# Supplementary material for: Integrated multi-omics single cell atlas of the human retina
Source: Research Square preprint supplement (doi:10.21203/rs.3.rs-3471275/v1), 2023-11-16
Supplement: Supplementary file 1 [file 357ea11b00bce82cd5f3ecd9.xlsx]

## Sheet: Top genes
Table S7. Top ranked genes of GB and BB using snRNA-seq and scRNA-seq datasets
group	names	logfoldchanges	pvals	pvals_adj	scores
snRNA_BB	AFF3	4.09563	0	0	73.9716
snRNA_BB	ANK1	6.18041	0	0	65.8253
snRNA_BB	SOX5	4.04223	0	0	65.812
snRNA_BB	ADARB2	4.58449	0	0	65.6975
snRNA_BB	SORCS3	9.39751	0	0	63.1932
snRNA_BB	TAFA1	9.69319	0	0	61.9895
snRNA_BB	ASTN2	3.8092	0	0	59.6494
snRNA_BB	CSMD1	2.48589	0	0	59.2951
snRNA_BB	SLC7A11	3.85061	0	0	57.5174
snRNA_BB	KIF13A	2.33994	0	0	56.1032
snRNA_BB	KIAA1217	2.8328	0	0	54.1438
snRNA_BB	AC110772.2	10.674	0	0	52.9478
snRNA_BB	PTPN3	4.15632	0	0	52.3703
snRNA_BB	SKOR2	6.00622	0	0	52.1949
snRNA_BB	TMEM108	2.74213	0	0	52.0766
snRNA_BB	TRPM1	2.26831	0	0	50.5018
snRNA_BB	SGCD	2.44599	0	0	50.3846
snRNA_BB	SGK1	3.49598	0	0	49.7654
snRNA_BB	PCDH11X	4.27519	0	0	48.1554
snRNA_BB	SYN2	2.23278	0	0	47.0263
snRNA_BB	COL4A2	4.04013	0	0	46.0367
snRNA_BB	LEMD1	3.06839	0	0	44.4608
snRNA_BB	EIF2AK3	2.7352	0	0	44.3727
snRNA_BB	GPC3	6.58768	0	0	43.7825
snRNA_BB	CTNNA3	5.61522	0	0	43.6422
snRNA_BB	TRAF3	1.8651	0	0	43.5674
snRNA_BB	PCDH15	2.16346	0	0	42.6716
snRNA_BB	CALD1	2.06187	0	0	42.5586
snRNA_BB	NRIP1	2.53062	0	0	42.1501
snRNA_BB	TENM1	2.70252	0	0	42.0787
snRNA_BB	SLC12A2	1.70021	0	0	42.0039
snRNA_BB	NAV3	3.57579	0	0	41.9731
snRNA_BB	PHACTR1	1.90885	0	0	41.5089
snRNA_BB	MEG3	1.88614	0	0	41.0068
snRNA_BB	LRMDA	3.24398	0	0	40.7657
snRNA_BB	THSD7B	6.9187	0	0	40.732
snRNA_BB	TAOK3	2.10713	0	0	40.5342
snRNA_BB	MYT1L	2.18802	0	0	40.3097
snRNA_BB	LRRTM3	6.06918	0	0	39.8347
snRNA_BB	SVIL	2.18921	0	0	39.5982
snRNA_BB	PCP4L1	2.83468	0	0	38.0072
snRNA_BB	RHOBTB3	2.21804	0	0	37.8172
snRNA_BB	HS3ST4	1.95238	0	1.87313e-307	37.6147
snRNA_BB	ZEB2	1.64244	3.08095e-307	4.59844e-305	37.4678
snRNA_BB	DCLK2	1.87663	1.78721e-305	2.59016e-303	37.3594
snRNA_BB	IL1RAPL1	4.04803	1.31698e-303	1.8814e-301	37.2442
snRNA_BB	PBX1	2.28368	4.16746e-297	5.70885e-295	36.8404
snRNA_BB	GAB2	2.65623	1.11295e-288	1.50399e-286	36.3103
snRNA_BB	AL355612.1	2.33861	1.69738e-283	2.26317e-281	35.9804
snRNA_BB	CDH12	1.5845	5.91055e-283	7.77704e-281	35.9457
snRNA_BB	NTM	1.5276	2.38124e-281	3.09252e-279	35.8428
snRNA_BB	CACNA1C	1.55163	1.30575e-277	1.65285e-275	35.602
snRNA_BB	RIMS1	1.1929	1.23106e-274	1.51983e-272	35.4092
snRNA_BB	DLGAP1	1.59802	1.32201e-274	1.61221e-272	35.4072
snRNA_BB	PLCE1	4.42752	5.64035e-272	6.7956e-270	35.2359
snRNA_BB	KLHL2	2.45078	8.26792e-270	9.84276e-268	35.0942
snRNA_BB	SORBS2	1.28444	5.46251e-266	6.42649e-264	34.8429
snRNA_BB	AC104117.3	1.55931	7.20723e-266	8.3805e-264	34.8349
snRNA_BB	KCNIP4	1.52413	9.93709e-264	1.14219e-261	34.6933
snRNA_BB	ZNF608	1.46191	1.50046e-260	1.70507e-258	34.4819
snRNA_BB	KLF12	1.7665	9.38524e-260	1.05452e-257	34.4287
snRNA_BB	GRM6	1.46287	8.32224e-256	9.24693e-254	34.1639
snRNA_BB	LSAMP	1.44833	5.26165e-252	5.71918e-250	33.907
snRNA_BB	SRGAP3	1.33867	5.62578e-252	6.04923e-250	33.905
snRNA_BB	NTRK3	1.97289	1.17027e-244	1.23187e-242	33.4047
snRNA_BB	PRICKLE1	1.48122	3.56407e-238	3.63681e-236	32.9552
snRNA_BB	STARD13	2.56157	2.74455e-237	2.74455e-235	32.8933
snRNA_BB	AC009562.1	1.66666	8.85617e-236	8.76849e-234	32.7876
snRNA_BB	LEMD1-DT	5.54533	3.09168e-228	3.00163e-226	32.254
snRNA_BB	LINC00200	3.07055	4.94455e-226	4.75438e-224	32.0964
snRNA_BB	DISC1	1.64384	1.86014e-223	1.77157e-221	31.9113
snRNA_BB	AP003086.1	2.5055	4.2953e-222	4.0143e-220	31.8129
snRNA_BB	PRKD3	1.57623	3.11117e-221	2.85428e-219	31.7506
snRNA_BB	SLC29A4	6.29653	2.33896e-216	2.12633e-214	31.3954
snRNA_BB	INTS6L	3.26675	3.3015e-215	2.97433e-213	31.311
snRNA_BB	STX18	2.05413	1.84981e-205	1.637e-203	30.5865
snRNA_BB	EHBP1	1.02651	4.38355e-205	3.84522e-203	30.5583
snRNA_BB	LIMS1	1.43302	2.25678e-202	1.96242e-200	30.3535
snRNA_BB	TENM3-AS1	2.12281	4.476e-201	3.85862e-199	30.2551
snRNA_BB	ARHGAP28	4.37459	1.3071e-196	1.0984e-194	29.9137
snRNA_BB	ANO3	5.19314	2.51163e-188	2.04197e-186	29.2698
snRNA_BB	PEAK1	1.42994	7.40342e-188	5.9705e-186	29.2329
snRNA_BB	ZMAT4	1.91898	1.38229e-186	1.09705e-184	29.1327
snRNA_BB	NRXN1	1.21887	2.76083e-186	2.17389e-184	29.109
snRNA_BB	FAM13B	1.54798	8.91407e-181	6.80464e-179	28.6705
snRNA_BB	CIT	3.61447	1.3644e-180	1.03363e-178	28.6556
snRNA_BB	FEZ2	1.82871	5.35931e-180	4.02956e-178	28.6079
snRNA_BB	MCTP1	4.15838	1.5608e-179	1.16477e-177	28.5705
snRNA_BB	PFKFB3	2.0585	2.96666e-173	2.18137e-171	28.0606
snRNA_BB	PSD3	1.21263	1.96671e-170	1.42515e-168	27.8284
snRNA_BB	COL4A1	4.7417	1.725e-169	1.24101e-167	27.7504
snRNA_BB	JPH4	1.5462	1.3326e-165	9.45104e-164	27.4263
snRNA_BB	CACNA1A	1.25488	3.74722e-165	2.62043e-163	27.3886
snRNA_BB	PLPPR4	2.7968	2.76599e-164	1.92082e-162	27.3156
snRNA_BB	LNPEP	1.57448	1.13455e-162	7.77089e-161	27.1795
snRNA_BB	KIAA0825	1.59037	2.00249e-162	1.36224e-160	27.1586
snRNA_BB	CTNNAL1	2.98208	6.67361e-162	4.5092e-160	27.1143
snRNA_BB	REPS2	1.113	6.05736e-161	4.06535e-159	27.033
snRNA_BB	SCN3A	3.71042	2.33643e-157	1.55762e-155	26.7262
snRNA_BB	COL25A1	5.02773	3.4429e-156	2.28007e-154	26.6255
snRNA_BB	SYBU	1.31664	1.72876e-155	1.13734e-153	26.5649
snRNA_BB	DNER	1.57771	2.26515e-152	1.47088e-150	26.2937
snRNA_BB	ATP11A	1.16106	5.1745e-152	3.33838e-150	26.2623
snRNA_BB	SEZ6	1.97693	1.36048e-151	8.72102e-150	26.2255
snRNA_BB	LINC01414	1.08683	4.85825e-149	3.09443e-147	26.0007
snRNA_BB	GNAO1	0.990648	7.35668e-149	4.65613e-147	25.9848
snRNA_BB	AC021683.3	2.22979	2.00461e-147	1.25288e-145	25.8575
snRNA_BB	CTTNBP2	1.50229	5.71665e-147	3.55071e-145	25.817
snRNA_BB	SDHC	1.80228	5.18761e-145	3.20223e-143	25.642
snRNA_BB	LDLRAD4	1.63474	8.60697e-144	5.28035e-142	25.5324
snRNA_BB	LINC01104	10.2294	2.97984e-142	1.80597e-140	25.3934
snRNA_BB	PCSK6	3.01222	2.33479e-140	1.39808e-138	25.2214
snRNA_BB	TMEM176B	1.30439	1.37682e-139	8.09893e-138	25.151
snRNA_BB	FLT1	1.53881	2.52544e-138	1.47686e-136	25.0353
snRNA_BB	AC092691.1	1.42016	7.09738e-138	4.12638e-136	24.994
snRNA_BB	CCDC92	1.38372	3.77928e-137	2.172e-135	24.9271
snRNA_BB	PLCB1	3.20433	1.00099e-134	5.65531e-133	24.7027
snRNA_BB	ANKRD34C-AS1	6.61532	1.34485e-133	7.55532e-132	24.5975
snRNA_BB	TCAIM	1.56771	1.3008e-129	7.22664e-128	24.2221
snRNA_BB	NME7	1.5962	3.57522e-127	1.94305e-125	23.9895
snRNA_BB	NSG1	1.12468	4.03154e-126	2.17921e-124	23.8885
snRNA_BB	CARMIL1	1.08179	4.70483e-126	2.52948e-124	23.8821
snRNA_BB	CEP126	2.08759	1.7243e-124	9.17181e-123	23.731
snRNA_BB	BMP7	6.24345	7.25147e-124	3.81656e-122	23.6706
snRNA_BB	SHANK2	0.967406	3.03468e-122	1.56427e-120	23.5126
snRNA_BB	SLC2A3	2.03193	6.95401e-122	3.56616e-120	23.4773
snRNA_BB	RANBP17	0.938661	4.81692e-121	2.45761e-119	23.3949
snRNA_BB	MARCH1	1.11825	8.38011e-120	4.23238e-118	23.2727
snRNA_BB	DIPK1A	2.20848	3.84579e-119	1.92289e-117	23.2073
snRNA_BB	PDE1A	1.08861	6.67181e-119	3.31931e-117	23.1836
snRNA_BB	CUX2	1.93124	2.14079e-117	1.05458e-115	23.0337
snRNA_BB	AC127526.2	4.86762	1.14035e-116	5.56268e-115	22.9611
snRNA_BB	ADARB2-AS1	2.94324	1.34998e-116	6.55329e-115	22.9538
snRNA_BB	PDGFC	1.94231	3.05131e-116	1.47406e-114	22.9183
snRNA_BB	SYTL2	2.47258	5.00584e-111	2.29626e-109	22.3893
snRNA_BB	CCNG2	1.15879	5.44105e-111	2.4845e-109	22.3856
snRNA_BB	HUNK	3.22285	7.17132e-111	3.25969e-109	22.3733
snRNA_BB	ZFHX4	1.04612	1.07008e-110	4.84201e-109	22.3554
snRNA_BB	PDIA5	1.5246	6.88846e-110	3.10291e-108	22.2721
snRNA_BB	APBA2	2.32541	4.05912e-109	1.82023e-107	22.1925
snRNA_BB	LINC00513	1.28665	1.4455e-108	6.45315e-107	22.1353
snRNA_BB	DUOX1	1.5172	4.40075e-107	1.94724e-105	21.9808
snRNA_BB	LINC00877	2.96581	5.764e-107	2.53921e-105	21.9685
snRNA_BB	ANKRD44	2.09869	2.97302e-106	1.29826e-104	21.8939
snRNA_BB	SREBF2	1.11615	7.04081e-106	3.06122e-104	21.8545
snRNA_BB	NPTX1	3.51704	8.37122e-106	3.6239e-104	21.8466
snRNA_BB	AC017101.1	1.17981	1.22554e-105	5.28248e-104	21.8292
snRNA_BB	DLG1	1.02206	6.60129e-104	2.80906e-102	21.6462
snRNA_BB	KCNN2	2.07835	9.18615e-104	3.89243e-102	21.631
snRNA_BB	GPC6	0.985784	1.51911e-103	6.40974e-102	21.6077
snRNA_BB	CDH22	2.01449	2.68708e-102	1.1243e-100	21.4747
snRNA_BB	PITPNC1	1.41085	8.23212e-102	3.43005e-100	21.4226
snRNA_BB	PTPRG	1.00385	1.8735e-101	7.77387e-100	21.3842
snRNA_BB	ATP2A2	1.29785	3.46406e-101	1.42554e-99	21.3555
snRNA_BB	KLHL3	1.85648	8.03222e-99	3.27846e-97	21.0995
snRNA_BB	RGS17	2.09124	1.26111e-98	5.08512e-97	21.0782
snRNA_BB	MIR100HG	3.39098	4.06567e-98	1.62627e-96	21.0227
snRNA_BB	SND1	1.12472	2.38624e-97	9.46921e-96	20.9385
snRNA_BB	LINC02649	1.78071	2.46065e-97	9.72588e-96	20.9371
snRNA_BB	AC004540.1	1.20904	3.5641e-97	1.40319e-95	20.9194
snRNA_BB	AC110296.1	0.864567	2.01269e-95	7.86209e-94	20.7261
snRNA_BB	SLC16A10	2.03242	5.31325e-95	2.06741e-93	20.6794
snRNA_BB	MTSS1	1.40118	5.90136e-95	2.28735e-93	20.6743
snRNA_BB	ARHGEF3	1.87091	1.70902e-94	6.59853e-93	20.6229
snRNA_BB	AGBL4	1.15874	1.33421e-92	5.05384e-91	20.411
snRNA_BB	SLC8A1	0.830188	2.3819e-91	8.9545e-90	20.2697
snRNA_BB	AC016831.7	1.73556	1.76115e-89	6.47482e-88	20.0568
snRNA_BB	CCNJL	4.70737	2.13099e-88	7.80584e-87	19.9324
snRNA_BB	PRDM8	0.95519	1.20653e-87	4.3715e-86	19.8454
snRNA_BB	AC020687.1	3.92077	1.40478e-87	5.0714e-86	19.8378
snRNA_BB	ASTN1	1.24539	1.85862e-87	6.68567e-86	19.8237
snRNA_BB	LIFR	3.08957	8.42504e-87	3.01973e-85	19.7475
snRNA_BB	TMEM51	9.02548	2.02816e-86	7.24343e-85	19.7031
snRNA_BB	ZNF208	2.41474	2.63604e-86	9.38092e-85	19.6898
snRNA_BB	XYLT1	1.30307	2.87538e-85	1.01964e-83	19.5684
snRNA_BB	CRIM1	3.23753	1.95552e-84	6.86148e-83	19.4704
snRNA_BB	ANKS1B	0.830564	3.50241e-84	1.22035e-82	19.4406
snRNA_BB	PROM1	3.49515	4.2461e-84	1.47434e-82	19.4307
snRNA_BB	RALGAPA2	0.786281	2.10581e-82	7.18705e-81	19.2293
snRNA_BB	FAM153CP	3.50359	2.54746e-82	8.66483e-81	19.2194
snRNA_BB	DPYSL3	3.05297	3.43525e-82	1.16449e-80	19.2039
snRNA_BB	MYO16	1.60339	1.00512e-80	3.3616e-79	19.0277
snRNA_BB	ATP9A	1.12241	2.51999e-80	8.37206e-79	18.9795
snRNA_BB	AC110772.1	10.6708	8.60691e-80	2.84056e-78	18.9148
snRNA_BB	ACKR1	1.69955	1.00506e-76	3.29527e-75	18.5388
snRNA_BB	LINC00290	2.64153	1.23419e-76	4.03331e-75	18.5277
snRNA_BB	IGSF3	1.65567	7.02914e-76	2.28962e-74	18.4339
snRNA_BB	TRIM14	1.35012	1.41201e-75	4.58444e-74	18.3961
snRNA_BB	KAZN	1.04299	2.32455e-75	7.52281e-74	18.369
snRNA_BB	SHROOM3	0.996678	3.20608e-75	1.03422e-73	18.3516
snRNA_BB	PEX6	1.29994	1.32692e-74	4.26663e-73	18.2743
snRNA_BB	ABAT	1.84055	6.21222e-74	1.9911e-72	18.1898
snRNA_BB	MIR99AHG	0.705116	1.4507e-73	4.60539e-72	18.1433
snRNA_BB	MAPRE2	0.607206	8.54222e-73	2.66944e-71	18.0456
snRNA_BB	PLPPR5	1.83178	1.55913e-72	4.8571e-71	18.0123
snRNA_BB	EML1	2.78755	1.77259e-72	5.50495e-71	18.0052
snRNA_BB	GALNT14	3.21936	3.01443e-72	9.33261e-71	17.9758
snRNA_BB	VLDLR-AS1	1.52002	2.41157e-71	7.42022e-70	17.8601
snRNA_BB	SLC24A2	0.690706	3.11222e-71	9.54668e-70	17.8459
snRNA_BB	GRM7	0.655688	1.86346e-70	5.62978e-69	17.7456
snRNA_BB	NPAS2	1.39643	2.39285e-70	7.18574e-69	17.7316
snRNA_BB	CELF4	0.899166	4.96164e-70	1.48109e-68	17.6905
snRNA_BB	AL353784.1	2.21923	7.82402e-70	2.3148e-68	17.6648
snRNA_BB	LRIG2	1.27354	3.50384e-69	1.02752e-67	17.58
snRNA_BB	DGCR9	1.29363	2.11666e-67	6.15308e-66	17.3459
snRNA_BB	KDM1A	1.08744	6.39598e-67	1.84855e-65	17.2823
snRNA_BB	MYO9B	1.64022	7.76182e-67	2.23041e-65	17.2711
snRNA_BB	MMS22L	1.85439	5.88046e-65	1.66115e-63	17.0196
snRNA_BB	GREB1L	0.78349	9.92225e-64	2.77934e-62	16.8533
snRNA_BB	FSTL1	5.58377	2.7333e-63	7.61364e-62	16.7933
snRNA_BB	SLC22A8	2.95252	3.22731e-63	8.96474e-62	16.7834
snRNA_BB	C4orf47	1.40038	6.14092e-63	1.69171e-61	16.7452
snRNA_BB	C7	4.51155	3.22003e-61	8.75009e-60	16.5079
snRNA_BB	PDE8B	2.1401	4.02358e-61	1.0904e-59	16.4944
snRNA_BB	NKD1	3.17743	6.89374e-61	1.86317e-59	16.4619
snRNA_BB	PCDH11Y	3.69583	1.00852e-60	2.71839e-59	16.4388
snRNA_BB	GPM6B	0.959024	1.30741e-60	3.50512e-59	16.4231
snRNA_BB	AMBRA1	0.989875	7.73813e-60	2.0635e-58	16.3149
snRNA_BB	KLF3-AS1	1.13162	8.14538e-60	2.16632e-58	16.3117
snRNA_BB	ZNF676	2.41539	8.44909e-60	2.24114e-58	16.3095
snRNA_BB	SH3GL3	1.10572	1.60278e-59	4.24017e-58	16.2703
snRNA_BB	CSGALNACT2	1.4675	3.04796e-59	8.02095e-58	16.2309
snRNA_BB	AC007098.1	1.05123	5.00196e-58	1.30941e-56	16.0583
snRNA_BB	C1orf21	1.14602	1.77183e-57	4.59024e-56	15.9796
snRNA_BB	TMEM164	2.17657	2.14234e-57	5.53577e-56	15.9678
snRNA_BB	RYBP	1.07812	2.60565e-57	6.71559e-56	15.9556
snRNA_BB	HIVEP3	0.93282	5.38707e-57	1.38485e-55	15.9102
snRNA_BB	FRRS1L	1.04309	1.2274e-56	3.14718e-55	15.8585
snRNA_BB	TLCD4	3.3412	2.32086e-56	5.92056e-55	15.8185
snRNA_BB	BRINP1	1.60205	5.74733e-56	1.45502e-54	15.7613
snRNA_BB	SHISA6	2.11087	1.0577e-55	2.67097e-54	15.7227
snRNA_BB	KSR2	0.821941	2.10765e-55	5.2956e-54	15.6789
snRNA_BB	STK35	0.700952	2.69455e-55	6.75326e-54	15.6633
snRNA_BB	AC083870.1	1.36077	4.48731e-55	1.12183e-53	15.6309
snRNA_BB	TRAK1	1.01173	6.31166e-55	1.57398e-53	15.6091
snRNA_BB	CAMK2N1	1.03953	1.01421e-54	2.51666e-53	15.5788
snRNA_BB	TRNP1	0.919061	1.46922e-54	3.62769e-53	15.5551
snRNA_BB	WIPF2	1.12711	1.69402e-54	4.17247e-53	15.546
snRNA_BB	SRGAP2	0.728875	2.52557e-54	6.20532e-53	15.5204
snRNA_BB	GLRX	2.12012	8.53427e-54	2.08153e-52	15.4421
snRNA_BB	EXOC5	1.02494	1.39561e-53	3.3874e-52	15.4103
snRNA_BB	CHKA	1.61743	7.19107e-53	1.72862e-51	15.304
snRNA_BB	RYR3	2.30874	4.8268e-52	1.15474e-50	15.1796
snRNA_BB	CDH6	1.41601	5.82056e-51	1.37928e-49	15.0154
snRNA_BB	SH3KBP1	2.01871	9.03551e-51	2.13605e-49	14.9862
snRNA_BB	ZNF98	3.01038	1.46743e-50	3.44468e-49	14.954
snRNA_BB	PLCXD3	5.3883	1.68298e-50	3.94141e-49	14.9448
snRNA_BB	WARS2-AS1	1.37734	1.7946e-50	4.19299e-49	14.9406
snRNA_BB	MSMO1	1.55118	2.71044e-50	6.27418e-49	14.9131
snRNA_BB	THUMPD2	0.988419	3.98711e-50	9.20811e-49	14.8873
snRNA_BB	CCDC148	1.10538	1.2017e-49	2.74989e-48	14.8133
snRNA_BB	DDAH1	2.5059	1.07774e-48	2.44385e-47	14.6652
snRNA_BB	FNBP1	1.05348	1.61322e-48	3.64159e-47	14.6377
snRNA_BB	MIPOL1	0.878387	2.07013e-48	4.64154e-47	14.6208
snRNA_BB	PPP2R3A	1.80613	2.63501e-48	5.89489e-47	14.6043
snRNA_BB	PRKCB	0.559575	5.12504e-48	1.14398e-46	14.5589
snRNA_BB	STK38	1.30036	9.15352e-48	2.03865e-46	14.5192
snRNA_BB	NEXMIF	1.26172	1.0002e-47	2.22266e-46	14.5131
snRNA_BB	KCNJ6	1.85672	3.17264e-47	6.98819e-46	14.4338
snRNA_BB	EPHA10	2.96725	4.3788e-47	9.58161e-46	14.4115
snRNA_BB	CDR2	1.43924	4.67534e-47	1.02082e-45	14.407
snRNA_BB	PRMT8	1.32248	4.9527e-47	1.07902e-45	14.403
snRNA_BB	CDH10	2.91696	7.86516e-47	1.70242e-45	14.371
snRNA_BB	LANCL2	1.31034	2.31989e-46	4.96764e-45	14.2959
snRNA_BB	B3GALNT2	0.838619	2.52436e-46	5.39393e-45	14.29
snRNA_BB	RNF165	1.30663	5.73299e-46	1.22239e-44	14.2328
snRNA_BB	GARNL3	1.39845	6.04327e-46	1.2858e-44	14.2291
snRNA_BB	AL157829.1	4.11087	8.66461e-46	1.83962e-44	14.2039
snRNA_BB	ATP8A2	0.676753	1.1694e-45	2.47231e-44	14.1829
snRNA_BB	MEG8	1.30266	1.44698e-45	3.05269e-44	14.1679
snRNA_BB	SFMBT2	1.31701	2.36867e-45	4.9762e-44	14.1333
snRNA_BB	STARD13-AS	2.84411	1.8695e-44	3.87059e-43	13.9871
snRNA_BB	RAPGEF4	1.30643	2.3722e-44	4.90123e-43	13.9701
snRNA_BB	TULP1	1.06697	2.79965e-44	5.77248e-43	13.9583
snRNA_BB	CNTNAP2	0.507371	3.29382e-44	6.77741e-43	13.9467
snRNA_BB	TARSL2	0.896819	4.00038e-44	8.21433e-43	13.9329
snRNA_BB	AL137100.3	1.07099	1.12422e-43	2.28964e-42	13.8589
snRNA_BB	CHPT1	1.19431	4.79465e-43	9.74522e-42	13.7544
snRNA_BB	BCL6	1.73871	5.55692e-43	1.12716e-41	13.7437
snRNA_BB	KLHL8	1.43247	2.83698e-42	5.71971e-41	13.6252
snRNA_BB	YBX3	2.24644	1.33212e-41	2.67494e-40	13.5118
snRNA_BB	NARS2	1.10175	3.08029e-41	6.14828e-40	13.45
snRNA_BB	PTPRN2	0.863069	3.10181e-41	6.1789e-40	13.4494
snRNA_BB	MAP3K5	0.735353	1.11567e-40	2.21364e-39	13.3545
snRNA_BB	GABBR2	0.5695	1.42167e-40	2.81519e-39	13.3364
snRNA_BB	TMEM192	1.61085	1.88056e-40	3.71653e-39	13.3155
snRNA_BB	HIF1A	0.679409	1.94904e-40	3.84425e-39	13.3128
snRNA_BB	MMP2	0.8924	4.16639e-40	8.12162e-39	13.256
snRNA_BB	KCNV1	10.2289	4.84686e-40	9.42969e-39	13.2446
snRNA_BB	C14orf132	1.46236	3.61872e-39	6.99945e-38	13.0928
snRNA_BB	AL035587.1	1.49242	6.2875e-39	1.2138e-37	13.0508
snRNA_BB	GRK3	1.16789	6.66237e-39	1.28369e-37	13.0464
snRNA_BB	SLC26A4	3.03429	8.56489e-39	1.64393e-37	13.0272
snRNA_BB	AC107072.2	0.91149	9.72809e-39	1.86362e-37	13.0175
snRNA_BB	NWD2	3.32747	1.00624e-38	1.92397e-37	13.0149
snRNA_BB	ISL1	0.662433	1.64291e-38	3.13532e-37	12.9774
snRNA_BB	SLC4A8	0.579256	2.20789e-38	4.18954e-37	12.9548
snRNA_BB	FUT9	2.79209	7.52154e-38	1.41916e-36	12.8604
snRNA_BB	LEMD1-AS1	3.87982	9.49136e-38	1.78745e-36	12.8424
snRNA_BB	CNNM1	1.25559	1.25515e-37	2.3593e-36	12.8207
snRNA_BB	CDK6	6.78396	3.93509e-37	7.36909e-36	12.7318
snRNA_BB	LIMCH1	0.530867	8.19886e-37	1.52964e-35	12.6744
snRNA_BB	FBXL13	0.987758	1.06101e-36	1.97581e-35	12.6542
snRNA_BB	EEPD1	1.24477	1.65753e-36	3.0752e-35	12.6191
snRNA_BB	TSTD3	0.924691	2.52239e-36	4.65386e-35	12.586
snRNA_BB	SLC6A11	2.78565	2.97256e-36	5.47433e-35	12.573
snRNA_BB	PRICKLE2	0.489597	4.17124e-36	7.66771e-35	12.5462
snRNA_BB	MFSD11	0.826044	7.12234e-36	1.2997e-34	12.5037
snRNA_BB	FGF14	0.488674	1.06641e-35	1.94247e-34	12.4716
snRNA_BB	SDK2	1.18386	1.35357e-35	2.46104e-34	12.4526
snRNA_BB	SULT1A1	1.81518	2.35839e-35	4.27244e-34	12.4082
snRNA_BB	PREX2	1.42096	3.17432e-35	5.74019e-34	12.3844
snRNA_BB	RASSF2	1.14879	1.03753e-34	1.86605e-33	12.289
snRNA_BB	PRTFDC1	0.983656	1.04971e-34	1.88458e-33	12.2881
snRNA_BB	MMP2-AS1	1.24515	2.32131e-34	4.16005e-33	12.2237
snRNA_BB	LINC00159	2.06587	2.59378e-34	4.64004e-33	12.2147
snRNA_BB	LINC02798	1.82911	5.85477e-34	1.04363e-32	12.1483
snRNA_BB	NIM1K	1.1892	8.10247e-34	1.43916e-32	12.1217
snRNA_BB	SMYD3	0.489023	9.79654e-34	1.7339e-32	12.1062
snRNA_BB	NANS	1.08855	1.27383e-33	2.25058e-32	12.0846
snRNA_BB	CDK14	1.37852	2.08999e-33	3.67956e-32	12.0438
snRNA_BB	KCNIP2-AS1	1.228	2.3753e-33	4.17452e-32	12.0333
snRNA_BB	CACNA1B	0.939287	2.46383e-33	4.32251e-32	12.0303
snRNA_BB	USP45	0.92013	2.62109e-33	4.59035e-32	12.0252
snRNA_BB	IFT81	0.99695	4.06512e-33	7.0821e-32	11.9888
snRNA_BB	CHRM2	2.39368	1.05143e-32	1.81909e-31	11.9099
snRNA_BB	FAM210A	0.890775	1.56719e-32	2.70673e-31	11.8765
snRNA_BB	AL355916.1	1.00245	1.77412e-32	3.05884e-31	11.8662
snRNA_BB	MAN1C1	0.966415	1.94076e-32	3.34037e-31	11.8587
snRNA_BB	NIN	1.73462	3.20707e-32	5.51043e-31	11.8165
snRNA_BB	ZMIZ1	0.769994	4.96268e-32	8.49775e-31	11.7798
snRNA_BB	DYNC2H1	0.818538	5.33766e-32	9.1242e-31	11.7736
snRNA_BB	ARHGAP10	2.26092	6.1373e-32	1.04732e-30	11.7619
snRNA_BB	SFI1	0.723933	1.12073e-31	1.89954e-30	11.7109
snRNA_BB	DHRS3	3.84252	1.14286e-31	1.93378e-30	11.7092
snRNA_BB	REEP1	1.3234	1.58182e-31	2.672e-30	11.6817
snRNA_BB	ERO1B	1.21724	1.62217e-31	2.73553e-30	11.6795
snRNA_BB	AC112196.1	1.28596	2.16103e-31	3.63198e-30	11.6551
snRNA_BB	IRS1	1.70088	2.27275e-31	3.81334e-30	11.6508
snRNA_BB	QPCT	1.90947	2.39932e-31	4.01897e-30	11.6462
snRNA_BB	IMMP2L	0.535962	4.08168e-31	6.82555e-30	11.6008
snRNA_BB	AATK	0.861181	4.20181e-31	7.01471e-30	11.5983
snRNA_BB	TNNI3K	1.1562	6.6964e-31	1.11607e-29	11.5584
snRNA_BB	MMD2	1.48961	7.1638e-31	1.19198e-29	11.5526
snRNA_BB	LRRC4B	1.45539	9.44981e-31	1.56974e-29	11.5288
snRNA_BB	FHIT	1.00794	1.07052e-30	1.77533e-29	11.518
snRNA_BB	SRPK1	0.905803	1.08986e-30	1.8044e-29	11.5165
snRNA_BB	ABCC8	0.880146	1.34367e-30	2.22094e-29	11.4984
snRNA_BB	PALM2-AKAP2	4.40859	2.5419e-30	4.18764e-29	11.4432
snRNA_BB	GRK5	1.99487	2.77569e-30	4.56528e-29	11.4356
snRNA_BB	MTHFD1L	0.887317	3.82381e-30	6.27883e-29	11.4078
snRNA_BB	TRANK1	2.9892	4.49838e-30	7.36233e-29	11.3936
snRNA_BB	ARMC9	0.839903	5.29542e-30	8.65265e-29	11.3794
snRNA_BB	TCERG1L	1.6099	8.85225e-30	1.44174e-28	11.3345
snRNA_BB	TPST1	0.755048	9.5098e-30	1.5438e-28	11.3282
snRNA_BB	CHD5	0.795819	9.56114e-30	1.54962e-28	11.3278
snRNA_BB	AP004608.1	2.209	1.1556e-29	1.86688e-28	11.3112
snRNA_BB	PBX3	2.21706	1.77904e-29	2.86019e-28	11.2732
snRNA_BB	AC006115.2	1.1984	2.21012e-29	3.54185e-28	11.2541
snRNA_BB	ZNF516	0.832396	2.28039e-29	3.64862e-28	11.2514
snRNA_BB	IFNGR2	0.817893	2.38881e-29	3.81598e-28	11.2473
snRNA_BB	DAB1	0.471465	2.80658e-29	4.4762e-28	11.233
snRNA_BB	SLF1	0.9798	3.68138e-29	5.86208e-28	11.209
snRNA_BB	RTN4RL1	0.855014	3.88657e-29	6.17896e-28	11.2042
snRNA_BB	PDK1	0.766107	5.23903e-29	8.31592e-28	11.1778
snRNA_BB	FGF13	3.05176	5.2891e-29	8.38209e-28	11.1769
snRNA_BB	AL138999.2	3.24006	7.0018e-29	1.10613e-27	11.152
snRNA_BB	ASB13	0.734572	1.09448e-28	1.72088e-27	11.1122
snRNA_BB	FAM153A	2.19635	1.15877e-28	1.8191e-27	11.1071
snRNA_BB	CPLX1	1.23424	1.19533e-28	1.87356e-27	11.1043
snRNA_BB	AL031428.1	0.962939	1.20725e-28	1.88928e-27	11.1034
snRNA_BB	B3GAT1	2.21277	1.2806e-28	2.00093e-27	11.0982
snRNA_BB	MYRIP	0.761836	1.76864e-28	2.75919e-27	11.0693
snRNA_BB	GALNT13	0.3484	1.89963e-28	2.95893e-27	11.0628
snRNA_BB	ZMIZ1-AS1	1.18453	1.9753e-28	3.07201e-27	11.0593
snRNA_BB	C1orf115	2.59096	5.94035e-28	9.18137e-27	10.9601
snRNA_BB	MYO1B	4.63744	6.73453e-28	1.03928e-26	10.9488
snRNA_BB	ANTXR2	0.954156	9.0814e-28	1.39714e-26	10.9217
snRNA_BB	TECPR2	1.02673	1.0309e-27	1.58114e-26	10.9101
snRNA_BB	AP003393.1	0.809807	1.13822e-27	1.74307e-26	10.9011
snRNA_BB	VWA5B1	4.33784	1.98858e-27	3.036e-26	10.8503
snRNA_BB	AC104803.1	2.73215	2.84238e-27	4.33289e-26	10.8176
snRNA_BB	SLC2A13	0.926734	3.53204e-27	5.37601e-26	10.7976
snRNA_BB	ELL2	3.87727	5.932e-27	9.00151e-26	10.7499
snRNA_BB	CCDC134	2.23016	1.14796e-26	1.73408e-25	10.6888
snRNA_BB	RTN1	0.682428	1.81664e-26	2.73591e-25	10.6462
snRNA_BB	RYR1	1.36678	2.64149e-26	3.9662e-25	10.6113
snRNA_BB	AC091938.1	0.50484	2.77159e-26	4.15531e-25	10.6068
snRNA_BB	RAB3C	0.61584	2.80232e-26	4.1951e-25	10.6057
snRNA_BB	C11orf49	0.498598	2.8969e-26	4.3302e-25	10.6026
snRNA_BB	GPR137B	1.21712	3.36814e-26	5.01958e-25	10.5885
snRNA_BB	CABLES1	1.28608	4.88666e-26	7.261e-25	10.5536
snRNA_BB	AC112178.1	0.878925	9.79768e-26	1.44509e-24	10.4881
snRNA_BB	MMP16	1.28901	1.41662e-25	2.07889e-24	10.4532
snRNA_BB	INPP5B	0.967542	1.4178e-25	2.07889e-24	10.4531
snRNA_BB	TNIK	0.607421	1.58284e-25	2.31748e-24	10.4427
snRNA_BB	AC058791.1	1.15783	2.10834e-25	3.07338e-24	10.4154
snRNA_BB	AC019197.1	2.0402	2.36402e-25	3.44107e-24	10.4045
snRNA_BB	DOCK4	0.394289	2.41931e-25	3.51643e-24	10.4023
snRNA_BB	RIOK3	0.686785	3.69618e-25	5.34903e-24	10.3619
snRNA_BB	ME1	0.568755	5.29624e-25	7.65352e-24	10.3274
snRNA_BB	KIAA1614	0.831221	5.76434e-25	8.31795e-24	10.3193
snRNA_BB	RORA	0.176554	6.98744e-25	1.00684e-23	10.3008
snRNA_BB	DNAH14	0.602887	1.11689e-24	1.60243e-23	10.2556
snRNA_BB	AC009126.1	1.41054	2.88545e-24	4.12797e-23	10.1635
snRNA_BB	IGSF11	0.580985	3.10737e-24	4.43909e-23	10.1563
snRNA_BB	ANAPC5	0.741354	3.39528e-24	4.84348e-23	10.1476
snRNA_BB	CACNA1D	0.484637	3.96784e-24	5.6522e-23	10.1324
snRNA_BB	TMEM200C	3.20451	5.63687e-24	8.01831e-23	10.098
snRNA_BB	GCFC2	1.0092	7.3121e-24	1.03571e-22	10.0725
snRNA_BB	AL355881.1	3.50167	8.25939e-24	1.16823e-22	10.0605
snRNA_BB	SYNDIG1	1.48726	8.38406e-24	1.18419e-22	10.059
snRNA_BB	PWRN1	2.85818	1.51071e-23	2.12476e-22	10.0009
snRNA_BB	FDFT1	1.01216	2.69302e-23	3.77173e-22	9.94346
snRNA_BB	AF127577.2	2.45812	3.13139e-23	4.37344e-22	9.92843
snRNA_BB	PHTF1	0.823687	3.79001e-23	5.28593e-22	9.90938
snRNA_BB	DIXDC1	1.01844	3.92566e-23	5.46749e-22	9.90586
snRNA_BB	RGS7BP	1.71988	5.51282e-23	7.6567e-22	9.87187
snRNA_BB	RHBDL3	0.514473	5.80671e-23	8.05369e-22	9.86666
snRNA_BB	TUBGCP3	0.800271	9.70608e-23	1.34433e-21	9.81498
snRNA_BB	AC008771.1	0.492213	9.72411e-23	1.34497e-21	9.81479
snRNA_BB	AC092567.1	0.68969	1.00433e-22	1.3872e-21	9.81153
snRNA_BB	MEST	1.36856	1.09846e-22	1.51303e-21	9.80249
snRNA_BB	FHL1	1.25535	1.75508e-22	2.40752e-21	9.75505
snRNA_BB	LINC01184	0.449826	2.30469e-22	3.15711e-21	9.72737
snRNA_BB	TACC2	0.816915	2.42143e-22	3.3125e-21	9.72234
snRNA_BB	IFT172	0.866093	2.70733e-22	3.69349e-21	9.71098
snRNA_BB	RAD51B	0.745432	2.7319e-22	3.72193e-21	9.71006
snRNA_BB	KCNAB3	1.80103	2.73977e-22	3.72758e-21	9.70976
snRNA_BB	AC026991.2	2.06502	2.75641e-22	3.74513e-21	9.70914
snRNA_BB	CDC14B	0.949083	3.39558e-22	4.58862e-21	9.68786
snRNA_BB	PLCL2	0.897668	4.94242e-22	6.66094e-21	9.64944
snRNA_BB	FAT1	3.22867	6.93164e-22	9.30421e-21	9.61469
snRNA_BB	SNRPN	0.781893	7.42564e-22	9.95395e-21	9.6076
snRNA_BB	RFLNA	1.07109	8.5709e-22	1.14584e-20	9.59282
snRNA_BB	SEPTIN10	1.08082	9.03682e-22	1.20652e-20	9.58736
snRNA_BB	RTN4RL2	1.78782	9.26175e-22	1.23326e-20	9.58482
snRNA_BB	SPECC1	1.31373	9.9423e-22	1.32211e-20	9.5775
snRNA_BB	SLC16A1-AS1	0.945801	1.3616e-21	1.80584e-20	9.54496
snRNA_BB	IMPDH1	0.898505	1.62445e-21	2.14874e-20	9.52665
snRNA_BB	GLUL	0.773986	1.68789e-21	2.22971e-20	9.52267
snRNA_BB	ASIC1	3.36781	1.71104e-21	2.25731e-20	9.52125
snRNA_BB	IGDCC4	1.52087	1.99459e-21	2.62791e-20	9.50531
snRNA_BB	FPGT	1.0898	2.06344e-21	2.71506e-20	9.50177
snRNA_BB	CC2D2A	0.462409	2.42502e-21	3.18662e-20	9.48495
snRNA_BB	HMGCR	1.32865	3.61638e-21	4.73968e-20	9.44318
snRNA_BB	PCDH10	1.78075	3.88304e-21	5.08251e-20	9.43572
snRNA_BB	AL136171.2	1.15557	4.42651e-21	5.78629e-20	9.42198
snRNA_BB	SCG5	0.952602	5.19636e-21	6.77492e-20	9.40513
snRNA_BB	TLE2	0.802228	9.30266e-21	1.21128e-19	9.3437
snRNA_BB	NEK2	3.31818	9.94098e-21	1.29272e-19	9.33667
snRNA_BB	SRGAP2C	0.947121	1.12631e-20	1.46085e-19	9.32344
snRNA_BB	BBS9	0.610415	1.17309e-20	1.51955e-19	9.31912
snRNA_BB	SSH2	0.524978	1.35567e-20	1.75377e-19	9.30376
snRNA_BB	TP53BP1	0.627789	1.48211e-20	1.91239e-19	9.29428
snRNA_BB	HIF1A-AS3	0.639217	1.55493e-20	2.00377e-19	9.28917
snRNA_BB	CSPP1	0.77436	1.79214e-20	2.30649e-19	9.27405
snRNA_BB	BHLHE40	0.76717	2.52647e-20	3.23907e-19	9.23736
snRNA_BB	RPS6KA5	0.63386	3.04101e-20	3.88379e-19	9.2175
snRNA_BB	G2E3	0.754719	3.11899e-20	3.9783e-19	9.21479
snRNA_BB	ESYT2	0.599294	3.25597e-20	4.14773e-19	9.21017
snRNA_BB	NUP93	0.444274	3.52534e-20	4.47947e-19	9.20164
snRNA_BB	NPM2	1.12531	3.71025e-20	4.70844e-19	9.19614
snRNA_BB	EML6	0.452	5.15058e-20	6.51972e-19	9.16082
snRNA_BB	GPR180	1.21763	5.36542e-20	6.77452e-19	9.15641
snRNA_BB	AL445433.2	1.49155	6.24507e-20	7.86532e-19	9.14
snRNA_BB	ASTN2-AS1	3.4208	6.70576e-20	8.43492e-19	9.1323
snRNA_BB	DNM3	0.40498	7.40088e-20	9.29759e-19	9.12162
snRNA_BB	AUXG01000058.1	1.24964	9.03234e-20	1.12904e-18	9.10001
snRNA_BB	AL049828.1	1.15241	9.95398e-20	1.24114e-18	9.08945
snRNA_BB	GRK4	0.431572	1.1897e-19	1.48157e-18	9.07004
snRNA_BB	AC091885.2	3.18048	1.3138e-19	1.63205e-18	9.05923
snRNA_BB	DZIP1	0.63222	1.61671e-19	2.00336e-18	9.03657
snRNA_BB	AC092802.1	3.09968	1.66081e-19	2.05546e-18	9.03362
snRNA_BB	RAPGEF2	0.578187	1.69124e-19	2.09053e-18	9.03164
snRNA_BB	USP43	3.73668	2.0918e-19	2.57928e-18	9.00835
snRNA_BB	CDH13	2.73286	2.15079e-19	2.64875e-18	9.0053
snRNA_BB	AP001011.1	0.427518	2.17807e-19	2.67905e-18	9.00392
snRNA_BB	ADAM10	0.624134	2.65451e-19	3.25707e-18	8.98218
snRNA_BB	MATN2	2.01341	3.49143e-19	4.26304e-18	8.95199
snRNA_BB	RNF180	0.735799	4.74025e-19	5.77375e-18	8.91818
snRNA_BB	STAT3	0.553184	6.75278e-19	8.1654e-18	8.87889
snRNA_BB	P3H2	1.55868	6.85832e-19	8.28299e-18	8.87717
snRNA_BB	ATR	0.54245	8.57179e-19	1.02903e-17	8.85232
snRNA_BB	TMEM41B	0.69451	1.09825e-18	1.31527e-17	8.82463
snRNA_BB	MSRA	0.816256	1.18001e-18	1.4115e-17	8.81659
snRNA_BB	RRAS2	1.2454	1.2088e-18	1.44421e-17	8.81389
snRNA_BB	NHS	0.831059	1.42662e-18	1.70241e-17	8.7953
snRNA_BB	APP	0.775421	1.64803e-18	1.96194e-17	8.77909
snRNA_BB	AL596451.1	1.83528	1.92314e-18	2.28402e-17	8.76171
snRNA_BB	ANKUB1	0.459657	2.10127e-18	2.48966e-17	8.75172
snRNA_BB	SLC8A1-AS1	0.579006	2.18321e-18	2.58368e-17	8.7474
snRNA_BB	TMEM51-AS1	7.30061	2.34226e-18	2.76536e-17	8.73946
snRNA_BB	TMEM241	1.11435	2.39051e-18	2.81567e-17	8.73716
snRNA_BB	EGLN1	0.630726	2.64556e-18	3.11242e-17	8.72569
snRNA_BB	C2orf88	1.05141	2.72578e-18	3.20303e-17	8.72231
snRNA_BB	ZCCHC14	0.569156	3.11257e-18	3.65325e-17	8.70728
snRNA_BB	HMGCS1	1.2571	3.32032e-18	3.89252e-17	8.69995
snRNA_BB	FARS2	0.575457	3.60926e-18	4.2263e-17	8.69047
snRNA_BB	LEKR1	1.27571	3.81277e-18	4.45938e-17	8.68424
snRNA_BB	L3MBTL1	0.812488	3.93379e-18	4.59555e-17	8.68069
snRNA_BB	DHX32	0.700603	5.57198e-18	6.47152e-17	8.64101
snRNA_BB	KCNQ2	3.62613	6.3674e-18	7.38677e-17	8.62575
snRNA_BB	SOX4	1.45101	7.65832e-18	8.87407e-17	8.6046
snRNA_BB	RD3L	0.953862	7.69356e-18	8.90458e-17	8.60407
snRNA_BB	PTCH2	2.94142	1.06032e-17	1.22439e-16	8.5672
snRNA_BB	KCNIP4-IT1	0.6361	1.09276e-17	1.26037e-16	8.56373
snRNA_BB	ZNF131	0.605508	1.24459e-17	1.43221e-16	8.54872
snRNA_BB	CNST	0.722689	1.74128e-17	1.99688e-16	8.50987
snRNA_BB	ARHGAP35	0.638047	1.88492e-17	2.15913e-16	8.50067
snRNA_BB	AC116565.1	1.95427	2.36093e-17	2.7013e-16	8.4745
snRNA_BB	BBS2	0.908151	2.65349e-17	3.03256e-16	8.46089
snRNA_BB	TDRD9	1.15615	2.66835e-17	3.04259e-16	8.46024
snRNA_BB	AL357873.1	3.58677	2.67159e-17	3.04281e-16	8.4601
snRNA_BB	GAB1	1.09308	2.76984e-17	3.15113e-16	8.45588
snRNA_BB	ICA1	1.2413	2.80649e-17	3.1892e-16	8.45435
snRNA_BB	ARNT2	0.83791	2.83057e-17	3.21291e-16	8.45335
snRNA_BB	SPOCK1	1.13312	3.26974e-17	3.70299e-16	8.4365
snRNA_BB	KCTD1	1.18955	3.42757e-17	3.87735e-16	8.43099
snRNA_BB	ELMO2	1.19212	3.69925e-17	4.17522e-16	8.42206
snRNA_BB	ETV1	2.90649	4.29654e-17	4.8439e-16	8.40451
snRNA_BB	KCNB2	0.149236	4.91585e-17	5.53587e-16	8.38869
snRNA_BB	SIL1	0.777334	5.23069e-17	5.87059e-16	8.38139
snRNA_BB	AC098829.1	0.472042	7.57538e-17	8.46411e-16	8.33769
snRNA_BB	HSPA4L	0.605513	7.62973e-17	8.51532e-16	8.33685
snRNA_BB	RFTN1	1.83779	7.95952e-17	8.87349e-16	8.33184
snRNA_BB	AL078459.1	2.32273	8.30981e-17	9.25369e-16	8.32674
snRNA_BB	NPDC1	0.626319	9.37327e-17	1.04032e-15	8.31247
snRNA_BB	TXNDC11	1.01211	1.16657e-16	1.29045e-15	8.28647
snRNA_BB	ARHGAP8	3.86241	1.32156e-16	1.45707e-15	8.27162
snRNA_BB	ARHGAP21	0.287741	1.47147e-16	1.62056e-15	8.2588
snRNA_BB	GTDC1	0.441303	1.50382e-16	1.65437e-15	8.2562
snRNA_BB	ANXA6	1.43744	1.71125e-16	1.87843e-15	8.24076
snRNA_BB	CHCHD6	0.795408	1.94376e-16	2.12898e-15	8.2255
snRNA_BB	TRAPPC12	0.632648	2.08236e-16	2.27581e-15	8.21724
snRNA_BB	UPP1	1.15551	2.1559e-16	2.35104e-15	8.21308
snRNA_BB	MIAT	3.09784	2.83178e-16	3.08137e-15	8.18028
snRNA_BB	ACTL6B	1.04344	2.83684e-16	3.08352e-15	8.18007
snRNA_BB	CYP51A1	0.791458	3.73368e-16	4.04516e-15	8.1469
snRNA_BB	BBS5	0.805473	3.80459e-16	4.11753e-15	8.14462
snRNA_BB	LRRC28	0.577628	3.95716e-16	4.27801e-15	8.13987
snRNA_BB	ALDH7A1	0.740297	4.05359e-16	4.37752e-15	8.13695
snRNA_BB	CLSTN2	2.13629	4.2935e-16	4.63161e-15	8.12998
snRNA_BB	P4HA1	0.403376	5.19932e-16	5.59669e-15	8.10675
snRNA_BB	MAPK10	0.385974	6.65963e-16	7.14553e-15	8.0766
snRNA_BB	TLN2	1.16291	7.01589e-16	7.51971e-15	8.07024
snRNA_BB	ANKRD37	0.686117	7.09506e-16	7.59642e-15	8.06887
snRNA_BB	MACROD1	1.29824	7.82481e-16	8.36878e-15	8.05691
snRNA_BB	LINC00174	0.989595	8.13914e-16	8.69567e-15	8.05209
snRNA_BB	FHOD3	1.20145	8.19152e-16	8.74228e-15	8.05131
snRNA_BB	AC016821.1	1.93895	8.866e-16	9.44196e-15	8.04162
snRNA_BB	SQLE	1.37166	9.82738e-16	1.04436e-14	8.029
snRNA_BB	MAPKBP1	1.10089	1.3325e-15	1.41154e-14	7.99155
snRNA_BB	IFT122	0.949113	1.43269e-15	1.51607e-14	7.98261
snRNA_BB	PCSK1N	0.577425	1.83428e-15	1.93286e-14	7.95207
snRNA_BB	CDC42	0.539321	2.02268e-15	2.12914e-14	7.93995
snRNA_BB	UBR4	0.572708	2.18476e-15	2.29733e-14	7.93038
snRNA_BB	DHDDS	0.946684	2.22189e-15	2.33392e-14	7.92829
snRNA_BB	AC010478.1	0.580278	2.30098e-15	2.41193e-14	7.92394
snRNA_BB	MALT1	0.616193	2.33784e-15	2.448e-14	7.92197
snRNA_BB	NOX4	2.36107	2.61975e-15	2.73746e-14	7.9078
snRNA_BB	ERICH3	1.81457	3.88902e-15	4.05952e-14	7.85845
snRNA_BB	PDZD4	1.52621	4.14394e-15	4.3166e-14	7.8505
snRNA_BB	MTR	0.566934	4.30842e-15	4.4786e-14	7.84561
snRNA_BB	EFS	2.34867	4.51207e-15	4.68543e-14	7.83982
snRNA_BB	CHN1	0.46309	4.52296e-15	4.69186e-14	7.83951
snRNA_BB	KLHL29	1.47887	5.03698e-15	5.21967e-14	7.82599
snRNA_BB	ITGA1	2.89201	5.45475e-15	5.64674e-14	7.81596
snRNA_BB	ST3GAL3	0.585168	5.50726e-15	5.69521e-14	7.81475
snRNA_BB	AC100800.1	2.04162	5.53178e-15	5.71465e-14	7.81419
snRNA_BB	ACAT2	1.33912	5.89534e-15	6.07767e-14	7.80617
snRNA_BB	MVB12B	0.690182	5.96787e-15	6.13979e-14	7.80462
snRNA_BB	P3H3	0.815812	5.98646e-15	6.15258e-14	7.80423
snRNA_BB	IRAK1BP1	0.712596	6.35746e-15	6.52717e-14	7.79664
snRNA_BB	MIR3681HG	1.83946	7.40645e-15	7.58857e-14	7.77734
snRNA_BB	FDPS	0.788644	7.76537e-15	7.94817e-14	7.77135
snRNA_BB	SIMC1	0.558986	9.93507e-15	1.01378e-13	7.74008
snRNA_BB	AC073571.1	4.75724	1.09904e-14	1.12033e-13	7.72724
snRNA_BB	RCBTB1	1.15698	1.17031e-14	1.19176e-13	7.71923
snRNA_BB	MCU	0.889799	1.19319e-14	1.21259e-13	7.71677
snRNA_BB	SEC31B	0.751405	1.41668e-14	1.43825e-13	7.69484
snRNA_BB	ELOVL6	0.520713	1.71771e-14	1.7421e-13	7.67017
snRNA_BB	ANTXR1	2.46808	1.73035e-14	1.75314e-13	7.66923
snRNA_BB	POLH	1.25207	1.77182e-14	1.79153e-13	7.66619
snRNA_BB	TMTC2	0.267824	1.96365e-14	1.98348e-13	7.65299
snRNA_BB	FADS2	1.0479	2.20535e-14	2.22313e-13	7.63805
snRNA_BB	ZNF318	0.757113	2.81563e-14	2.82694e-13	7.60653
snRNA_BB	AC096747.1	2.45352	2.84815e-14	2.85672e-13	7.60504
snRNA_BB	TTC21B	0.533046	2.91891e-14	2.92476e-13	7.60187
snRNA_BB	LUZP1	0.997228	2.95535e-14	2.95831e-13	7.60026
snRNA_BB	PELI1	1.95021	3.45874e-14	3.44839e-13	7.57988
snRNA_BB	AC119673.2	0.450008	3.50172e-14	3.48777e-13	7.57828
snRNA_BB	DEPTOR	1.40246	3.60268e-14	3.58475e-13	7.57459
snRNA_BB	AC105383.1	2.128	3.63033e-14	3.60868e-13	7.5736
snRNA_BB	ECE2	3.80409	3.73363e-14	3.70768e-13	7.56995
snRNA_BB	CHKB-DT	0.819238	3.75723e-14	3.72741e-13	7.56913
snRNA_BB	NRSN1	0.542391	3.89805e-14	3.86328e-13	7.56435
snRNA_BB	MAST4	1.07265	4.38979e-14	4.34203e-13	7.54889
snRNA_BB	TM2D1	0.594159	5.33201e-14	5.25839e-13	7.52352
snRNA_BB	EIF2B3	0.638405	5.5519e-14	5.46985e-13	7.51824
snRNA_BB	KCND3	0.320141	5.79054e-14	5.69935e-13	7.51273
snRNA_BB	RAI2	1.00232	6.22172e-14	6.1117e-13	7.50333
snRNA_BB	CTNND1	0.533083	6.32604e-14	6.20808e-13	7.50115
snRNA_BB	CLCN4	0.593695	6.64193e-14	6.51169e-13	7.49476
snRNA_BB	CROT	1.19553	6.67526e-14	6.53796e-13	7.4941
snRNA_BB	TEX2	1.26141	6.96358e-14	6.80037e-13	7.48856
snRNA_BB	RAPGEF4-AS1	1.54041	9.08517e-14	8.85494e-13	7.45356
snRNA_BB	TMEM135	0.542123	9.12724e-14	8.88728e-13	7.45296
snRNA_BB	KAT6B	0.390323	1.01313e-13	9.85535e-13	7.43918
snRNA_BB	SEC22A	0.514561	1.0404e-13	1.01107e-12	7.43567
snRNA_BB	TMEM63C	0.880315	1.08049e-13	1.04902e-12	7.43067
snRNA_BB	LINC01303	0.958236	1.15457e-13	1.11986e-12	7.42189
snRNA_BB	NUP58	0.546756	1.29988e-13	1.25835e-12	7.40618
snRNA_BB	ADCY9	0.634241	1.32062e-13	1.2772e-12	7.40408
snRNA_BB	ALG1L9P	1.28835	1.4698e-13	1.41873e-12	7.38986
snRNA_BB	ZNF821	0.729687	1.61982e-13	1.56202e-12	7.37693
snRNA_BB	CALY	0.521914	1.72686e-13	1.66364e-12	7.3684
snRNA_BB	SERINC5	1.47265	1.79417e-13	1.72682e-12	7.3633
snRNA_BB	AC077690.1	0.439	2.35294e-13	2.26027e-12	7.32704
snRNA_BB	CPNE7	1.32445	2.46341e-13	2.36412e-12	7.32088
snRNA_BB	ZNF704	0.581615	2.88879e-13	2.76704e-12	7.29948
snRNA_BB	AC009264.1	2.28625	4.28398e-13	4.09167e-12	7.24627
snRNA_BB	HFM1	0.824417	4.46172e-13	4.25737e-12	7.24076
snRNA_BB	CCNC	0.61886	4.84279e-13	4.61218e-12	7.22964
snRNA_BB	RUFY2	0.55646	4.86367e-13	4.62766e-12	7.22905
snRNA_BB	RCOR1	0.803376	5.07681e-13	4.82128e-12	7.22323
snRNA_BB	NRG2	0.384503	7.21334e-13	6.82435e-12	7.17533
snRNA_BB	EMSY	0.478028	7.93147e-13	7.48958e-12	7.16233
snRNA_BB	SORD	1.26573	1.14024e-12	1.07368e-11	7.11242
snRNA_BB	PRXL2A	2.07304	1.7052e-12	1.59962e-11	7.05669
snRNA_BB	TSHZ3	0.384739	1.8215e-12	1.70393e-11	7.04751
snRNA_BB	ITGA8	1.00091	1.89973e-12	1.77379e-11	7.04165
snRNA_BB	MICAL3	0.641905	2.19256e-12	2.04339e-11	7.02165
snRNA_BB	AQP11	0.915967	2.31564e-12	2.15408e-11	7.01402
snRNA_BB	DOCK7	0.399151	2.70278e-12	2.50955e-11	6.99237
snRNA_BB	TTLL3	0.775116	2.81688e-12	2.61064e-11	6.98657
snRNA_BB	PTRH2	0.832029	3.02218e-12	2.79573e-11	6.97669
snRNA_BB	SHISA5	1.0552	3.29979e-12	3.04971e-11	6.96433
snRNA_BB	ZNF589	0.681434	3.41945e-12	3.15739e-11	6.95931
snRNA_BB	SLC16A2	1.40701	3.5427e-12	3.26817e-11	6.95432
snRNA_BB	AL645568.1	0.827397	4.33271e-12	3.99328e-11	6.92588
snRNA_BB	DEAF1	0.714242	4.44305e-12	4.09121e-11	6.92232
snRNA_BB	KIF27	1.44344	5.21329e-12	4.79603e-11	6.89964
snRNA_BB	ADAMTS10	3.27499	6.4046e-12	5.87039e-11	6.87035
snRNA_BB	CYP46A1	1.22807	6.72555e-12	6.15893e-11	6.86337
snRNA_BB	BANP	0.762589	7.03293e-12	6.43452e-11	6.85698
snRNA_BB	AC040168.1	1.20234	7.77331e-12	7.08597e-11	6.84267
snRNA_BB	JAK2	0.537702	7.83423e-12	7.135e-11	6.84155
snRNA_BB	ZNF350-AS1	1.00834	8.02787e-12	7.29807e-11	6.83805
snRNA_BB	PINX1	1.54437	8.1365e-12	7.3901e-11	6.83612
snRNA_BB	MGMT	0.911242	8.59876e-12	7.79579e-11	6.8282
snRNA_BB	B3GLCT	0.302712	1.14198e-11	1.03254e-10	6.78737
snRNA_BB	RAP1GAP	0.672492	1.21864e-11	1.10085e-10	6.77798
snRNA_BB	LARP4	0.50993	1.30532e-11	1.17809e-10	6.76805
snRNA_BB	MTAP	1.36573	1.35585e-11	1.22259e-10	6.76255
snRNA_BB	ARMCX4	0.529106	1.36029e-11	1.22549e-10	6.76208
snRNA_BB	USP37	0.490011	1.39642e-11	1.25691e-10	6.75828
snRNA_BB	STON2	3.285	1.45737e-11	1.31059e-10	6.75208
snRNA_BB	AC105402.3	0.972491	1.56564e-11	1.40668e-10	6.74168
snRNA_BB	LPCAT2	0.93453	1.67415e-11	1.49879e-10	6.73194
snRNA_BB	PPP2R2D	0.456948	1.69042e-11	1.51201e-10	6.73053
snRNA_BB	SEC14L2	0.72961	1.83848e-11	1.64281e-10	6.71831
snRNA_BB	GNAQ	0.322281	1.84159e-11	1.64281e-10	6.71806
snRNA_BB	TMED8	0.552369	1.88363e-11	1.67881e-10	6.71477
snRNA_BB	LONRF1	0.524483	2.07206e-11	1.84183e-10	6.70085
snRNA_BB	RAB30	1.0221	2.14907e-11	1.90859e-10	6.69552
snRNA_BB	CABIN1	0.433568	2.36579e-11	2.09919e-10	6.68146
snRNA_BB	PFKFB4	0.583512	2.40704e-11	2.1339e-10	6.67892
snRNA_BB	FAM171A1	0.850962	2.70253e-11	2.39162e-10	6.66193
snRNA_BB	CCDC30	1.19803	2.7133e-11	2.39902e-10	6.66135
snRNA_BB	SLC19A1	0.929773	2.80625e-11	2.47902e-10	6.6564
snRNA_BB	KLF3	0.686145	3.18537e-11	2.80649e-10	6.63774
snRNA_BB	INPP5F	0.764989	3.34352e-11	2.94324e-10	6.63059
snRNA_BB	DYNC2LI1	0.539605	3.53008e-11	3.10201e-10	6.62257
snRNA_BB	BBS7	0.761446	3.55298e-11	3.11938e-10	6.62161
snRNA_BB	H2AFZ	0.591255	3.62579e-11	3.18052e-10	6.61862
snRNA_BB	ATP8B2	4.88449	3.77469e-11	3.30823e-10	6.61266
snRNA_BB	NARF	0.648103	3.91149e-11	3.42213e-10	6.60739
snRNA_BB	TTLL5	0.593926	4.04101e-11	3.53235e-10	6.60257
snRNA_BB	CNTFR	1.04256	4.21662e-11	3.67942e-10	6.59626
snRNA_BB	ACAD11	0.641752	4.32703e-11	3.77248e-10	6.59242
snRNA_BB	SLAIN1	0.627769	4.57503e-11	3.98522e-10	6.58415
snRNA_BB	PFKP	0.451446	4.81137e-11	4.18744e-10	6.57666
snRNA_BB	EVI5L	0.830631	4.83742e-11	4.20645e-10	6.57586
snRNA_BB	OXCT1	0.863997	5.05251e-11	4.38967e-10	6.56938
snRNA_BB	SLC44A2	0.777515	5.2549e-11	4.56154e-10	6.56353
snRNA_BB	EYA3	0.469062	5.38669e-11	4.66784e-10	6.55984
snRNA_BB	ADD2	0.52749	5.74034e-11	4.96999e-10	6.55035
snRNA_BB	CCDC186	0.536141	6.00245e-11	5.18795e-10	6.54368
snRNA_BB	WDR17	0.480412	6.11013e-11	5.27645e-10	6.54102
snRNA_BB	TSPYL2	0.666905	6.1552e-11	5.31078e-10	6.53992
snRNA_BB	SGSM1	2.42143	6.34912e-11	5.47338e-10	6.53528
snRNA_BB	MVD	0.842146	7.1102e-11	6.1242e-10	6.51831
snRNA_BB	MDN1	0.524758	8.24135e-11	7.08628e-10	6.49613
snRNA_BB	SCD5	0.243967	8.30951e-11	7.13875e-10	6.49489
snRNA_BB	PDE4A	1.0211	8.35376e-11	7.17061e-10	6.49409
snRNA_BB	CCDC171	0.45383	8.57934e-11	7.35792e-10	6.49008
snRNA_BB	DDB1	0.525245	8.8374e-11	7.57275e-10	6.48561
snRNA_BB	ELP3	0.638776	8.86146e-11	7.58303e-10	6.4852
snRNA_BB	SYT7	1.62497	8.86456e-11	7.58303e-10	6.48515
snRNA_BB	NMNAT2	0.657465	9.38904e-11	8.01113e-10	6.47647
snRNA_BB	ENO1	0.41171	9.65209e-11	8.22855e-10	6.4723
snRNA_BB	TIAM2	0.611945	9.87911e-11	8.40775e-10	6.46879
snRNA_BB	CDON	0.612563	1.17974e-10	1.00318e-09	6.44192
snRNA_BB	RACGAP1	2.13987	1.19918e-10	1.01885e-09	6.43944
snRNA_BB	EPB41L1	0.7918	1.21505e-10	1.03145e-09	6.43744
snRNA_BB	LIFR-AS1	1.94828	1.33904e-10	1.13463e-09	6.42267
snRNA_BB	IFT74	0.633157	1.39737e-10	1.18221e-09	6.41618
snRNA_BB	RNF216	0.406931	1.39894e-10	1.18253e-09	6.41601
snRNA_BB	HMG20A	0.544451	1.42522e-10	1.20271e-09	6.41317
snRNA_BB	DNAAF4	1.66649	1.55384e-10	1.30794e-09	6.39999
snRNA_BB	SLC35E3	0.600934	1.7789e-10	1.49487e-09	6.37931
snRNA_BB	IDI1	0.803335	1.99884e-10	1.67688e-09	6.36143
snRNA_BB	PWRN4	1.33803	2.03792e-10	1.7068e-09	6.35846
snRNA_BB	MAMLD1	1.26063	2.13425e-10	1.78151e-09	6.35136
snRNA_BB	NPRL3	0.438837	2.13628e-10	1.78172e-09	6.35121
snRNA_BB	MSTN	2.72781	2.41807e-10	2.01506e-09	6.33212
snRNA_BB	FBXW7	0.406655	2.73151e-10	2.26681e-09	6.3133
snRNA_BB	NUDT5	0.733554	2.94197e-10	2.43944e-09	6.30181
snRNA_BB	NMD3	0.3879	2.98839e-10	2.47588e-09	6.29938
snRNA_BB	CTNNA1	1.03532	2.99736e-10	2.48126e-09	6.29892
snRNA_BB	INSR	0.389546	3.0006e-10	2.48189e-09	6.29875
snRNA_BB	NOL4L	0.618902	3.0629e-10	2.53132e-09	6.29556
snRNA_BB	ZNF708	0.595792	3.17633e-10	2.6229e-09	6.28992
snRNA_BB	SETX	0.455123	3.18363e-10	2.62676e-09	6.28956
snRNA_BB	AC127035.1	0.931155	3.2145e-10	2.65004e-09	6.28806
snRNA_BB	WDR93	1.62097	3.37703e-10	2.77944e-09	6.2804
snRNA_BB	AC105285.1	0.489996	3.53941e-10	2.9107e-09	6.27309
snRNA_BB	MT-ND4	0.358038	3.62309e-10	2.97707e-09	6.26946
snRNA_BB	RIMS3	2.66379	3.78978e-10	3.10893e-09	6.26245
snRNA_BB	AC011476.3	0.787629	4.10089e-10	3.35863e-09	6.25014
snRNA_BB	ERI3	0.673812	4.21147e-10	3.44638e-09	6.24598
snRNA_BB	AL096854.1	2.11131	4.32783e-10	3.5387e-09	6.24172
snRNA_BB	ZNF451-AS1	0.423522	4.61547e-10	3.77081e-09	6.23165
snRNA_BB	KCTD6	1.07348	4.65801e-10	3.80245e-09	6.23021
snRNA_BB	SCRG1	0.943545	4.6651e-10	3.80514e-09	6.22997
snRNA_BB	RPLP0	0.456091	4.70329e-10	3.83316e-09	6.2287
snRNA_BB	CCDC57	0.589932	4.7785e-10	3.88496e-09	6.22621
snRNA_BB	GNB2	1.91807	4.89261e-10	3.9745e-09	6.22251
snRNA_BB	AL133227.1	1.25484	4.9856e-10	4.04347e-09	6.21956
snRNA_BB	AC090578.1	1.54009	5.10172e-10	4.1343e-09	6.21594
snRNA_BB	TBC1D16	0.827645	5.21649e-10	4.22388e-09	6.21245
snRNA_BB	PPARA	0.810089	5.39111e-10	4.36174e-09	6.20728
snRNA_BB	LDAH	0.638857	5.3986e-10	4.36427e-09	6.20706
snRNA_BB	ACOX1	0.732016	5.84591e-10	4.71825e-09	6.19453
snRNA_BB	NPHP3	0.629138	5.87163e-10	4.73519e-09	6.19384
snRNA_BB	LIMA1	0.905626	6.26548e-10	5.04061e-09	6.1836
snRNA_BB	LARP1	0.485582	6.28066e-10	5.04876e-09	6.18322
snRNA_BB	LRIG2-DT	0.943816	6.30808e-10	5.06673e-09	6.18253
snRNA_BB	FOXO1	1.01965	6.36925e-10	5.11176e-09	6.18101
snRNA_BB	AC006148.1	0.395052	6.92257e-10	5.54249e-09	6.16785
snRNA_BB	KCNC1	0.438837	7.62417e-10	6.08959e-09	6.15256
snRNA_BB	RNF149	0.509031	8.94792e-10	7.1355e-09	6.12713
snRNA_BB	SEC14L1	0.752406	9.29111e-10	7.39955e-09	6.12113
snRNA_BB	ENTPD1-AS1	0.412929	1.08392e-09	8.60936e-09	6.09654
snRNA_BB	AC010735.2	2.08326	1.08942e-09	8.64616e-09	6.09573
snRNA_BB	AC096576.2	0.595874	1.10765e-09	8.7839e-09	6.09307
snRNA_BB	STX1B	2.09663	1.10892e-09	8.78698e-09	6.09289
snRNA_BB	AC092821.3	2.43791	1.18683e-09	9.38944e-09	6.08201
snRNA_BB	PKD2L2	1.50251	1.18903e-09	9.39942e-09	6.08172
snRNA_BB	PDE6B	0.741555	1.25144e-09	9.88496e-09	6.07351
snRNA_BB	UBP1	0.580877	1.29492e-09	1.02123e-08	6.06803
snRNA_BB	EIF1B-AS1	0.738307	1.32236e-09	1.04205e-08	6.06466
snRNA_BB	ECHDC2	0.633617	1.36486e-09	1.07426e-08	6.05957
snRNA_BB	PKIG	0.661172	1.37198e-09	1.0786e-08	6.05873
snRNA_BB	TENT4A	0.612655	1.64086e-09	1.28594e-08	6.02988
snRNA_BB	RAD9A	0.85113	1.71035e-09	1.33935e-08	6.02317
snRNA_BB	CTNNBL1	0.685936	1.76688e-09	1.38254e-08	6.01791
snRNA_BB	IARS	0.526979	1.77321e-09	1.3864e-08	6.01733
snRNA_BB	RNF144A	0.689901	1.78472e-09	1.39431e-08	6.01628
snRNA_BB	LRRIQ3	3.71512	1.86166e-09	1.45102e-08	6.00944
snRNA_BB	HM13	0.597426	1.95138e-09	1.51858e-08	6.0018
snRNA_BB	MED19	1.04986	2.00994e-09	1.56172e-08	5.997
snRNA_BB	YPEL2	0.49029	2.0398e-09	1.58369e-08	5.99461
snRNA_BB	TBC1D9B	0.763398	2.10706e-09	1.63212e-08	5.98933
snRNA_BB	AC027601.6	1.09243	2.25396e-09	1.74321e-08	5.97836
snRNA_BB	GNPTAB	0.629084	2.2584e-09	1.74529e-08	5.97804
snRNA_BB	FMNL3	0.968952	2.28405e-09	1.76103e-08	5.9762
snRNA_BB	CA5B	0.716261	2.34084e-09	1.80342e-08	5.97219
snRNA_BB	KCNH1	2.59752	2.36572e-09	1.82119e-08	5.97047
snRNA_BB	ZC3H7A	0.491386	2.37101e-09	1.82385e-08	5.97011
snRNA_BB	TTC28-AS1	0.417316	2.56874e-09	1.97141e-08	5.95702
snRNA_BB	PARP11	0.845521	2.68421e-09	2.05845e-08	5.94983
snRNA_BB	SLC39A10	0.74223	2.81996e-09	2.15923e-08	5.94175
snRNA_BB	ANKIB1	0.323106	3.25263e-09	2.48482e-08	5.91831
snRNA_BB	LGR5	4.67531	3.38771e-09	2.58604e-08	5.91161
snRNA_BB	ZIM2	1.56966	3.40424e-09	2.59668e-08	5.91081
snRNA_BB	CNTRL	0.516741	3.70739e-09	2.82576e-08	5.89675
snRNA_BB	MARCH5	0.767746	3.89814e-09	2.96888e-08	5.88846
snRNA_BB	ABLIM1	0.193972	3.93041e-09	2.99118e-08	5.8871
snRNA_BB	NUP153	0.4817	3.9728e-09	3.02114e-08	5.88532
snRNA_BB	FGF11	1.22049	4.0062e-09	3.04423e-08	5.88394
snRNA_BB	CCDC13	0.602041	4.45977e-09	3.38374e-08	5.86617
snRNA_BB	DAGLA	2.78714	4.64362e-09	3.51789e-08	5.85946
snRNA_BB	MFN1	0.498339	4.70761e-09	3.56367e-08	5.85719
snRNA_BB	ZKSCAN7-AS1	0.453435	4.73849e-09	3.58433e-08	5.85611
snRNA_BB	CRTC3	0.46797	5.05123e-09	3.81225e-08	5.84548
snRNA_BB	TAPT1	0.612516	6.15505e-09	4.63483e-08	5.81249
snRNA_BB	IGDCC3	2.23254	6.83147e-09	5.12873e-08	5.79502
snRNA_BB	FLNB	2.37418	7.3407e-09	5.5069e-08	5.78294
snRNA_BB	PTGFRN	1.26797	7.77138e-09	5.82126e-08	5.77334
snRNA_BB	UHRF2	0.424351	7.88014e-09	5.89831e-08	5.771
snRNA_BB	LNPK	0.355945	8.10894e-09	6.06502e-08	5.76618
snRNA_BB	CDKL2	0.850992	8.26834e-09	6.17963e-08	5.76289
snRNA_BB	DARS-AS1	1.19304	8.30011e-09	6.19874e-08	5.76225
snRNA_BB	IFNAR2	0.826041	8.86551e-09	6.61605e-08	5.75112
snRNA_BB	GTPBP2	0.961108	9.26695e-09	6.91047e-08	5.74363
snRNA_BB	AP000721.2	1.55331	9.69684e-09	7.22566e-08	5.73595
snRNA_BB	PTPN1	0.416678	9.71954e-09	7.23719e-08	5.73555
snRNA_BB	ZHX1	0.624121	1.03888e-08	7.72404e-08	5.72426
snRNA_BB	AZIN1-AS1	0.404455	1.09516e-08	8.11831e-08	5.71529
snRNA_BB	HDAC4	0.427378	1.09889e-08	8.13991e-08	5.71471
snRNA_BB	SLC18B1	1.24019	1.25131e-08	9.24155e-08	5.69258
snRNA_BB	CDC14A	1.72628	1.27004e-08	9.37296e-08	5.69005
snRNA_BB	ATF7IP2	0.433322	1.27496e-08	9.40233e-08	5.68939
snRNA_BB	LRRC23	0.970977	1.28912e-08	9.49978e-08	5.6875
snRNA_BB	HS6ST2	4.92011	1.3967e-08	1.02698e-07	5.67379
snRNA_BB	CERS5	0.389129	1.39794e-08	1.02714e-07	5.67364
snRNA_BB	PCOLCE	2.20898	1.4432e-08	1.05962e-07	5.66818
snRNA_BB	ANKRD13A	0.480203	1.48324e-08	1.08742e-07	5.66349
snRNA_BB	CACNG7	0.866146	1.51027e-08	1.10642e-07	5.66039
snRNA_BB	PLEKHA1	0.592504	1.55134e-08	1.13485e-07	5.65579
snRNA_BB	ABHD17C	1.64199	1.62735e-08	1.18958e-07	5.64757
snRNA_BB	PEX3	0.473438	1.69113e-08	1.2353e-07	5.64095
snRNA_BB	METTL6	0.56237	1.69289e-08	1.23569e-07	5.64077
snRNA_BB	TIAM1	1.75295	1.7089e-08	1.24647e-07	5.63915
snRNA_BB	NUBP1	0.861946	1.71673e-08	1.25126e-07	5.63836
snRNA_BB	TYR	2.52996	1.71911e-08	1.25209e-07	5.63813
snRNA_BB	EVA1C	0.734078	1.79159e-08	1.30297e-07	5.63101
snRNA_BB	CASTOR3	0.52073	1.7935e-08	1.30341e-07	5.63082
snRNA_BB	MAGI2-AS3	0.629755	1.83232e-08	1.3297e-07	5.62713
snRNA_BB	NBDY	0.675347	2.19981e-08	1.59291e-07	5.5955
snRNA_BB	NAB1	0.790348	2.20182e-08	1.59321e-07	5.59535
snRNA_BB	FAM153B	2.67418	2.29596e-08	1.66013e-07	5.58808
snRNA_BB	NRXN2	0.694054	2.32988e-08	1.68344e-07	5.58553
snRNA_BB	CEP63	0.407698	2.33357e-08	1.68489e-07	5.58526
snRNA_BB	BNIP3	0.392204	2.49115e-08	1.79478e-07	5.57389
snRNA_BB	NUP210L	0.658219	2.55914e-08	1.84111e-07	5.5692
snRNA_BB	HLCS	0.344836	2.72244e-08	1.95578e-07	5.55841
snRNA_BB	KIAA1324	1.46476	2.78827e-08	2.00163e-07	5.55424
snRNA_BB	ARFIP1	0.418129	2.83894e-08	2.03654e-07	5.55109
snRNA_BB	FAM76A	0.567832	2.94751e-08	2.11291e-07	5.54453
snRNA_BB	SLC13A3	1.24543	2.98822e-08	2.14056e-07	5.54213
snRNA_BB	DNAJC5	0.496428	2.99909e-08	2.1468e-07	5.54149
snRNA_BB	AC006460.1	1.90664	3.02013e-08	2.16033e-07	5.54027
snRNA_BB	PPP1R13L	2.25905	3.16777e-08	2.26431e-07	5.5319
snRNA_BB	SEPTIN11	0.442468	3.23997e-08	2.31426e-07	5.52795
snRNA_BB	SLC19A2	1.17229	3.31778e-08	2.36815e-07	5.52378
snRNA_BB	LARP1B	0.351407	3.58836e-08	2.55946e-07	5.51
snRNA_BB	TMEM245	0.423386	3.62835e-08	2.58614e-07	5.50805
snRNA_BB	SMAP2	0.496837	3.7847e-08	2.69374e-07	5.50061
snRNA_BB	NSG2	1.67912	3.87305e-08	2.7527e-07	5.49655
snRNA_BB	MAPK14	0.472685	4.01796e-08	2.85164e-07	5.49006
snRNA_BB	NLGN4X	0.302213	4.49232e-08	3.18604e-07	5.47032
snRNA_BB	HHATL	0.307074	4.56082e-08	3.23004e-07	5.46763
snRNA_BB	TXLNG	0.579709	4.56728e-08	3.23233e-07	5.46738
snRNA_BB	DTWD1	0.429056	4.58672e-08	3.24379e-07	5.46663
snRNA_BB	NUP98	0.392194	4.68417e-08	3.30803e-07	5.4629
snRNA_BB	ARHGEF4	1.42281	4.76116e-08	3.36002e-07	5.46001
snRNA_BB	NUP188	0.76472	4.86926e-08	3.43147e-07	5.45602
snRNA_BB	USPL1	0.610146	5.09524e-08	3.5882e-07	5.44795
snRNA_BB	HELLS	1.33863	5.20009e-08	3.65689e-07	5.44433
snRNA_BB	TBC1D19	0.465219	5.35057e-08	3.76006e-07	5.43925
snRNA_BB	AC007608.3	3.83236	5.36048e-08	3.76438e-07	5.43892
snRNA_BB	IFNLR1	2.25979	5.43808e-08	3.81619e-07	5.43636
snRNA_BB	AC005908.3	1.24983	5.44727e-08	3.81996e-07	5.43606
snRNA_BB	GOLM1	0.67326	5.49233e-08	3.84886e-07	5.43459
snRNA_BB	SLC22A17	0.577046	5.79857e-08	4.06062e-07	5.4249
snRNA_BB	RNF215	0.646576	5.84501e-08	4.09028e-07	5.42348
snRNA_BB	EFCAB11	0.617926	5.89894e-08	4.12225e-07	5.42184
snRNA_BB	RAD54L2	0.450642	6.08753e-08	4.25107e-07	5.41621
snRNA_BB	IDH1	0.990569	6.17077e-08	4.30439e-07	5.41378
snRNA_BB	SOGA3	0.529813	6.17249e-08	4.30439e-07	5.41373
snRNA_BB	CACNA2D2	1.10362	6.46996e-08	4.50554e-07	5.4053
snRNA_BB	NPL	0.566974	6.48884e-08	4.51555e-07	5.40478
snRNA_BB	ADIPOR2	0.768613	6.71323e-08	4.66845e-07	5.39868
snRNA_BB	ZNF566	0.633431	6.86367e-08	4.76975e-07	5.3947
snRNA_BB	ZNF730	0.992358	6.92907e-08	4.81185e-07	5.393
snRNA_BB	USP54	0.495461	7.10152e-08	4.92819e-07	5.38858
snRNA_BB	MLH3	0.429846	7.11754e-08	4.93588e-07	5.38818
snRNA_BB	SYNDIG1L	2.01079	7.15506e-08	4.95846e-07	5.38723
snRNA_BB	METTL9	0.638874	7.68617e-08	5.31915e-07	5.37434
snRNA_BB	AC110285.2	0.524988	7.74085e-08	5.35328e-07	5.37307
snRNA_BB	TMEM67	0.941236	7.96503e-08	5.50451e-07	5.36792
snRNA_BB	POLR1C	0.672605	8.16518e-08	5.63744e-07	5.36344
snRNA_BB	CHST15	1.56424	8.16865e-08	5.63744e-07	5.36336
snRNA_BB	SEPTIN6	0.573062	8.42976e-08	5.81363e-07	5.35768
snRNA_BB	FRMD4B	0.599333	8.6722e-08	5.97259e-07	5.35255
snRNA_BB	HEXD	0.762538	8.81192e-08	6.06464e-07	5.34966
snRNA_BB	MBNL3	2.49317	8.94299e-08	6.15061e-07	5.34699
snRNA_BB	ALG8	0.798886	9.36107e-08	6.42931e-07	5.33871
snRNA_BB	ULK3	0.378174	9.86857e-08	6.77321e-07	5.32913
snRNA_BB	FAM162A	0.439554	1.02478e-07	7.02389e-07	5.32227
snRNA_BB	G2E3-AS1	0.983857	1.0574e-07	7.23751e-07	5.31657
snRNA_BB	SPATA6L	1.18658	1.08966e-07	7.4481e-07	5.3111
snRNA_BB	OXNAD1	0.685695	1.09935e-07	7.50925e-07	5.30948
snRNA_BB	PNPT1	0.484422	1.11873e-07	7.63635e-07	5.3063
snRNA_BB	KLHDC1	0.452819	1.18944e-07	8.10798e-07	5.29511
snRNA_BB	AL592183.1	0.553563	1.20497e-07	8.20828e-07	5.29274
snRNA_BB	DLG3	0.747306	1.21653e-07	8.28135e-07	5.29099
snRNA_BB	UHRF1BP1	0.621985	1.2178e-07	8.28433e-07	5.2908
snRNA_BB	CTSF	0.43499	1.26001e-07	8.56566e-07	5.28457
snRNA_BB	PHTF2	0.473572	1.44875e-07	9.8021e-07	5.25896
snRNA_BB	LMTK3	0.750329	1.50298e-07	1.01484e-06	5.25219
snRNA_BB	SLC3A2	0.844189	1.54879e-07	1.04437e-06	5.24666
snRNA_BB	NECAB1	2.80577	1.58666e-07	1.06918e-06	5.24221
snRNA_BB	AC109439.2	0.820396	1.59375e-07	1.07323e-06	5.24139
snRNA_BB	ZNF10	0.392606	1.70472e-07	1.14642e-06	5.22895
snRNA_BB	AC004039.1	0.723885	1.71944e-07	1.15476e-06	5.22736
snRNA_BB	STX18-AS1	0.424691	1.76568e-07	1.18502e-06	5.22245
snRNA_BB	Z84485.1	0.769397	1.8008e-07	1.20697e-06	5.21881
snRNA_BB	SGCZ	3.24592	1.84137e-07	1.23334e-06	5.21468
snRNA_BB	SYNPR	1.04726	1.84744e-07	1.23657e-06	5.21407
snRNA_BB	GRB2	0.58023	1.88876e-07	1.26339e-06	5.20996
snRNA_BB	CNIH3	0.570419	1.90092e-07	1.26897e-06	5.20877
snRNA_BB	USP32	0.341857	1.92811e-07	1.28627e-06	5.20614
snRNA_BB	SMARCA4	0.377815	1.98942e-07	1.32628e-06	5.20032
snRNA_BB	AC011346.1	0.620445	2.02426e-07	1.34861e-06	5.1971
snRNA_BB	PODXL2	0.452893	2.04925e-07	1.36434e-06	5.19481
snRNA_BB	LEO1	0.730291	2.09762e-07	1.39469e-06	5.19047
snRNA_BB	CASKIN1	0.65717	2.1095e-07	1.40166e-06	5.18942
snRNA_BB	BMERB1	0.302365	2.14327e-07	1.42221e-06	5.18646
snRNA_BB	METTL16	0.407753	2.19001e-07	1.4513e-06	5.18244
snRNA_BB	HULC	0.599963	2.20656e-07	1.4613e-06	5.18104
snRNA_BB	HEATR5B	0.415798	2.21236e-07	1.46417e-06	5.18055
snRNA_BB	EFCAB7	0.521416	2.29827e-07	1.52002e-06	5.17344
snRNA_BB	WASHC4	0.410762	2.43372e-07	1.60748e-06	5.16273
snRNA_BB	LY6E-DT	2.63125	2.56155e-07	1.69079e-06	5.15314
snRNA_BB	RNF182	0.680146	2.79193e-07	1.84164e-06	5.13698
snRNA_BB	ASRGL1	0.750618	2.82058e-07	1.85809e-06	5.13506
snRNA_BB	DLGAP1-AS4	1.2858	2.84779e-07	1.87355e-06	5.13325
snRNA_BB	PXK	0.510676	2.85736e-07	1.87737e-06	5.13262
snRNA_BB	KPNA5	0.379029	2.92094e-07	1.91662e-06	5.12848
snRNA_BB	LINC02245	0.7454	2.94267e-07	1.92962e-06	5.12708
snRNA_BB	TVP23A	0.86188	3.01657e-07	1.97679e-06	5.12241
snRNA_BB	HSPA1A	0.821389	3.10428e-07	2.0316e-06	5.117
snRNA_BB	TUBE1	0.397025	3.28489e-07	2.14699e-06	5.10632
snRNA_BB	GRID1-AS1	1.29239	3.41191e-07	2.2271e-06	5.09915
snRNA_BB	CRYZL1	0.360405	3.47464e-07	2.26656e-06	5.0957
snRNA_BB	CEP70	0.443043	3.5204e-07	2.29492e-06	5.09322
snRNA_BB	PRDM2	0.363595	3.66564e-07	2.38804e-06	5.08555
snRNA_BB	BNIP3L	0.29938	3.71461e-07	2.41837e-06	5.08303
snRNA_BB	ZNF718	0.435285	3.79031e-07	2.46605e-06	5.0792
snRNA_BB	AP001347.1	0.563596	3.86411e-07	2.51079e-06	5.07553
snRNA_BB	GEM	0.959605	3.99194e-07	2.59217e-06	5.06934
snRNA_BB	AL603839.3	0.789638	4.19152e-07	2.72e-06	5.06005
snRNA_BB	TAFA5	0.947654	4.35345e-07	2.82039e-06	5.05281
snRNA_BB	FAM117A	0.684321	4.37649e-07	2.83268e-06	5.05181
snRNA_BB	KNDC1	1.72186	4.41705e-07	2.85708e-06	5.05005
snRNA_BB	AKAP8L	0.363108	4.45011e-07	2.87661e-06	5.04862
snRNA_BB	KCTD20	0.517908	4.5778e-07	2.95723e-06	5.04321
snRNA_BB	KATNAL1	0.562863	4.7812e-07	3.08384e-06	5.03489
snRNA_BB	FLRT2	3.58033	4.91915e-07	3.16956e-06	5.02944
snRNA_BB	TBCD	0.431517	4.9584e-07	3.19279e-06	5.02792
snRNA_BB	STAT2	0.591163	5.01447e-07	3.22681e-06	5.02576
snRNA_BB	BCL2L1	0.742099	5.1717e-07	3.32585e-06	5.01983
snRNA_BB	AL139260.1	0.532763	5.40106e-07	3.47112e-06	5.01149
snRNA_BB	LINC01170	1.82668	5.54096e-07	3.55874e-06	5.00657
snRNA_BB	SEC24D	1.31717	5.85001e-07	3.75482e-06	4.9961
snRNA_BB	CNOT10	0.527733	5.92346e-07	3.79709e-06	4.9937
snRNA_BB	AC084198.2	0.414117	5.99879e-07	3.84291e-06	4.99126
snRNA_BB	LINC00910	0.926994	6.03743e-07	3.86272e-06	4.99002
snRNA_BB	CAND2	0.874438	6.62331e-07	4.23215e-06	4.9721
snRNA_BB	TBC1D12	0.618255	6.66257e-07	4.25451e-06	4.97095
snRNA_BB	CEBPZOS	0.453491	7.10026e-07	4.52246e-06	4.9586
snRNA_BB	PARP16	0.468108	7.15277e-07	4.553e-06	4.95717
snRNA_BB	ZNF83	0.403218	7.45902e-07	4.7379e-06	4.94901
snRNA_BB	C20orf203	0.699902	7.46218e-07	4.7379e-06	4.94893
snRNA_BB	DNAJC17	0.525722	7.61626e-07	4.83265e-06	4.94495
snRNA_BB	MYCBP2-AS1	0.460797	8.00846e-07	5.07186e-06	4.93516
snRNA_BB	TMOD3	0.538276	8.0651e-07	5.10449e-06	4.93379
snRNA_BB	EIF2AK2	0.565334	8.21526e-07	5.19296e-06	4.93018
snRNA_BB	BBS1	0.606286	8.38443e-07	5.2932e-06	4.9262
snRNA_BB	LIPE-AS1	0.392333	8.72105e-07	5.49877e-06	4.9185
snRNA_BB	PTPRG-AS1	0.345991	8.90759e-07	5.61285e-06	4.91435
snRNA_BB	CDKL3	0.420742	8.98155e-07	5.65589e-06	4.91273
snRNA_BB	FAM117B	0.599698	9.40015e-07	5.91204e-06	4.9038
snRNA_BB	ZC3H8	0.410093	9.79998e-07	6.1519e-06	4.89561
snRNA_BB	FAM193B	0.58598	9.86728e-07	6.19026e-06	4.89427
snRNA_BB	MLLT3	0.366554	1.00726e-06	6.3151e-06	4.89022
snRNA_BB	SPINT2	1.0784	1.04342e-06	6.53772e-06	4.88327
snRNA_BB	KAZN-AS1	3.48905	1.04892e-06	6.56805e-06	4.88223
snRNA_BB	FBXL2	0.361928	1.07046e-06	6.69877e-06	4.87822
snRNA_BB	RPSA	0.360939	1.08101e-06	6.76054e-06	4.87629
snRNA_BB	ZNF512	0.492646	1.09291e-06	6.83068e-06	4.87413
snRNA_BB	NR2F1	0.708043	1.1017e-06	6.88132e-06	4.87254
snRNA_BB	MPP7	1.26689	1.10653e-06	6.90718e-06	4.87168
snRNA_BB	DPYSL4	0.543168	1.11543e-06	6.9584e-06	4.8701
snRNA_BB	AIM2	1.45513	1.11823e-06	6.97148e-06	4.8696
snRNA_BB	GALK2	0.51752	1.13326e-06	7.06046e-06	4.86696
snRNA_BB	MMAB	0.615428	1.18403e-06	7.36793e-06	4.85829
snRNA_BB	FAM204A	0.549277	1.1895e-06	7.39741e-06	4.85738
snRNA_BB	PRKAR2A	0.349357	1.20935e-06	7.51614e-06	4.8541
snRNA_BB	NME5	0.89013	1.23398e-06	7.65499e-06	4.8501
snRNA_BB	WDR11-AS1	0.524066	1.31606e-06	8.15405e-06	4.83731
snRNA_BB	UFSP2	0.472114	1.32254e-06	8.1891e-06	4.83634
snRNA_BB	ADK	0.244549	1.34858e-06	8.34518e-06	4.83246
snRNA_BB	NDST3	0.175573	1.35638e-06	8.38826e-06	4.83131
snRNA_BB	SETD3	0.460004	1.41069e-06	8.7187e-06	4.82349
snRNA_BB	RNF207	1.68598	1.45326e-06	8.97071e-06	4.81756
snRNA_BB	ZBTB40	0.711565	1.46161e-06	9.01673e-06	4.81641
snRNA_BB	ANKRD27	0.44362	1.46688e-06	9.04365e-06	4.8157
snRNA_BB	AC005037.1	0.535531	1.4732e-06	9.077e-06	4.81484
snRNA_BB	PTBP3	0.760482	1.50837e-06	9.288e-06	4.81012
snRNA_BB	PAGR1	0.377305	1.54139e-06	9.48547e-06	4.80579
snRNA_BB	LY6H	2.33076	1.58754e-06	9.76346e-06	4.79989
snRNA_BB	AC108169.1	1.94374	1.60245e-06	9.84909e-06	4.79802
snRNA_BB	C11orf74	0.779959	1.67971e-06	1.03113e-05	4.78857
snRNA_BB	AGBL3	0.472182	1.68877e-06	1.03605e-05	4.78749
snRNA_BB	CDCA8	2.18485	1.70002e-06	1.04232e-05	4.78616
snRNA_BB	OTUD4	0.488637	1.73408e-06	1.0619e-05	4.78217
snRNA_BB	CYB5D2	0.484725	1.74705e-06	1.06919e-05	4.78068
snRNA_BB	STOX2	0.36827	1.76026e-06	1.07661e-05	4.77916
snRNA_BB	CEP162	0.845425	1.76855e-06	1.08102e-05	4.77822
snRNA_BB	IVD	0.633364	1.80245e-06	1.10107e-05	4.7744
snRNA_BB	COPA	0.358285	1.81045e-06	1.10528e-05	4.77351
snRNA_BB	PTPN18	0.670162	1.83802e-06	1.12143e-05	4.77046
snRNA_BB	PIP4K2A	1.03605	1.87768e-06	1.14353e-05	4.76616
snRNA_BB	ITGA9-AS1	0.844536	1.88334e-06	1.14628e-05	4.76556
snRNA_BB	RASD1	0.833224	1.93878e-06	1.17859e-05	4.7597
snRNA_BB	LINC02246	2.33006	1.95473e-06	1.18612e-05	4.75805
snRNA_BB	LDB2	0.230294	1.97726e-06	1.19907e-05	4.75573
snRNA_BB	SMC1A	0.423091	2.01545e-06	1.22148e-05	4.75187
snRNA_BB	SALL4	4.26753	2.05116e-06	1.24162e-05	4.74832
snRNA_BB	CISD1	0.507792	2.05957e-06	1.24596e-05	4.74749
snRNA_BB	CFAP221	0.843362	2.09132e-06	1.2644e-05	4.74439
snRNA_BB	XIAP	0.460988	2.1193e-06	1.28054e-05	4.7417
snRNA_BB	UMAD1	0.279707	2.13278e-06	1.28791e-05	4.74042
snRNA_BB	AP003025.2	1.06623	2.16092e-06	1.30412e-05	4.73776
snRNA_BB	RAB11FIP3	0.401918	2.24369e-06	1.35325e-05	4.73014
snRNA_BB	AC079447.1	0.409993	2.25644e-06	1.36012e-05	4.72899
snRNA_BB	RCAN3	0.714131	2.27194e-06	1.36864e-05	4.7276
snRNA_BB	TACC1	0.668636	2.29109e-06	1.37935e-05	4.72589
snRNA_BB	IGF2BP3	3.80253	2.36714e-06	1.42256e-05	4.71925
snRNA_BB	AL589843.1	0.481198	2.56256e-06	1.53447e-05	4.70309
snRNA_BB	DDIT4	0.56464	2.60624e-06	1.55875e-05	4.69964
snRNA_BB	TRPM2	3.32296	2.61101e-06	1.56062e-05	4.69926
snRNA_BB	TASP1	0.337252	2.61369e-06	1.56062e-05	4.69905
snRNA_BB	PLOD1	1.20521	2.61404e-06	1.56062e-05	4.69903
snRNA_BB	AC092338.2	1.82385	2.68951e-06	1.60472e-05	4.69321
snRNA_BB	CTPS1	1.19062	2.70358e-06	1.61119e-05	4.69214
snRNA_BB	TTC9C	0.779311	2.71215e-06	1.61534e-05	4.6915
snRNA_BB	AC104365.1	0.544769	2.72212e-06	1.62031e-05	4.69075
snRNA_BB	AHCTF1	0.36811	2.73638e-06	1.62783e-05	4.68968
snRNA_BB	KYAT1	0.683077	2.76767e-06	1.64546e-05	4.68735
snRNA_BB	IFT80	0.490126	2.77693e-06	1.64999e-05	4.68666
snRNA_BB	DDHD2	0.374168	2.78161e-06	1.65179e-05	4.68632
snRNA_BB	GALNT8	1.26622	2.90662e-06	1.72398e-05	4.67731
snRNA_BB	HPCAL4	1.24399	2.9667e-06	1.75738e-05	4.67311
snRNA_BB	SCLY	0.648548	2.99691e-06	1.77332e-05	4.67103
snRNA_BB	AP003025.1	1.11632	3.00447e-06	1.77674e-05	4.67051
snRNA_BB	AP005901.5	0.597679	3.01189e-06	1.78007e-05	4.67001
snRNA_BB	HABP4	0.687534	3.17289e-06	1.86861e-05	4.6593
snRNA_BB	SPTLC2	0.521574	3.26089e-06	1.9193e-05	4.65366
snRNA_BB	AL356113.1	1.34417	3.41678e-06	2.00987e-05	4.64403
snRNA_BB	PHF21B	0.358231	3.56282e-06	2.09331e-05	4.63538
snRNA_BB	AC092691.3	1.48303	3.58332e-06	2.10412e-05	4.63419
snRNA_BB	TRMT10B	0.445328	3.91929e-06	2.29064e-05	4.61562
snRNA_BB	AC005480.1	0.519876	3.93393e-06	2.29786e-05	4.61484
snRNA_BB	HIPK1	0.478719	3.9908e-06	2.32836e-05	4.61186
snRNA_BB	PHYHD1	0.913942	4.13114e-06	2.40787e-05	4.60467
snRNA_BB	RYK	0.364076	4.1319e-06	2.40787e-05	4.60464
snRNA_BB	KDSR	0.530792	4.15367e-06	2.41915e-05	4.60354
snRNA_BB	MGA	0.461755	4.25367e-06	2.4745e-05	4.59859
snRNA_BB	ZFAND4	0.566769	4.2768e-06	2.48651e-05	4.59746
snRNA_BB	FAM66C	0.521568	4.30909e-06	2.50383e-05	4.59589
snRNA_BB	SMARCD3	1.24738	4.40379e-06	2.55737e-05	4.59135
snRNA_BB	RUBCN	0.619414	4.52551e-06	2.625e-05	4.58566
snRNA_BB	TSNARE1	0.624487	4.55014e-06	2.63776e-05	4.58453
snRNA_BB	XKR9	0.841171	4.70676e-06	2.7254e-05	4.57745
snRNA_BB	NDUFAF6	0.35943	4.73683e-06	2.74122e-05	4.57612
snRNA_BB	ELP1	0.377259	4.74146e-06	2.74232e-05	4.57591
snRNA_BB	UTP23	0.517989	4.79409e-06	2.77115e-05	4.5736
snRNA_BB	SPRED1	0.449434	4.79942e-06	2.77263e-05	4.57337
snRNA_BB	WDR45B	0.454716	4.88517e-06	2.82054e-05	4.56966
snRNA_BB	EPRS	0.453223	4.89267e-06	2.82323e-05	4.56934
snRNA_BB	PDE7B	1.49775	4.98649e-06	2.87571e-05	4.56536
snRNA_BB	MAATS1	1.49042	5.0629e-06	2.91642e-05	4.56216
snRNA_BB	FRS2	0.364265	5.10437e-06	2.93861e-05	4.56045
snRNA_BB	UBE4A	0.555982	5.30607e-06	3.05122e-05	4.55231
snRNA_BB	PPFIA1	0.320323	5.43744e-06	3.12496e-05	4.54716
snRNA_BB	EEFSEC	0.520456	5.52494e-06	3.17343e-05	4.5438
snRNA_BB	ZC2HC1A	0.517609	5.97081e-06	3.42756e-05	4.52742
snRNA_BB	LINC01278	0.274847	6.03415e-06	3.46194e-05	4.52519
snRNA_BB	CYP27A1	0.484119	6.09258e-06	3.49345e-05	4.52315
snRNA_BB	NR3C2	0.203798	6.13505e-06	3.51301e-05	4.52168
snRNA_BB	GRIN2D	1.29356	6.14744e-06	3.51684e-05	4.52125
snRNA_BB	NCDN	0.880109	6.25822e-06	3.57613e-05	4.51747
snRNA_BB	MIGA1	0.369907	6.38379e-06	3.6458e-05	4.51326
snRNA_BB	EML2	0.518009	6.61624e-06	3.77424e-05	4.50567
snRNA_BB	ACHE	1.2752	6.63108e-06	3.77861e-05	4.5052
snRNA_BB	ZNF627	0.869345	6.63477e-06	3.77861e-05	4.50508
snRNA_BB	ZNF480	1.19522	6.65108e-06	3.78547e-05	4.50456
snRNA_BB	FIP1L1	0.335546	6.70811e-06	3.81576e-05	4.50275
snRNA_BB	EFHC1	0.489221	6.76478e-06	3.84403e-05	4.50096
snRNA_BB	TFR2	0.83644	6.7655e-06	3.84403e-05	4.50094
snRNA_BB	AL138733.1	1.33932	6.78887e-06	3.85512e-05	4.5002
snRNA_BB	ZNF346	0.43126	6.83365e-06	3.87615e-05	4.4988
snRNA_BB	IL7	0.688248	6.90067e-06	3.90973e-05	4.49673
snRNA_BB	PHYKPL	0.480578	7.1142e-06	4.02615e-05	4.49024
snRNA_BB	NAALAD2	0.763865	7.28726e-06	4.11942e-05	4.48512
snRNA_BB	RETREG3	0.460815	7.38158e-06	4.17039e-05	4.48238
snRNA_BB	GNAL	0.852051	7.52031e-06	4.24158e-05	4.4784
snRNA_BB	REC8	1.01708	7.6625e-06	4.3169e-05	4.4744
snRNA_BB	RARS2	0.372274	7.72852e-06	4.34921e-05	4.47257
snRNA_BB	TIMP2	0.638258	7.72854e-06	4.34921e-05	4.47257
snRNA_BB	C8orf31	1.89392	7.76173e-06	4.36543e-05	4.47165
snRNA_BB	GPR158	1.05233	7.94787e-06	4.46259e-05	4.46658
snRNA_BB	NUDCD3	0.332105	7.96519e-06	4.4698e-05	4.46612
snRNA_BB	SMG1	0.357057	8.16166e-06	4.57749e-05	4.4609
snRNA_BB	FBXL18	0.65281	8.28243e-06	4.64262e-05	4.45775
snRNA_BB	FAM133B	0.349159	8.48004e-06	4.74806e-05	4.45269
snRNA_BB	FBXL4	0.475805	8.5571e-06	4.78853e-05	4.45075
snRNA_BB	PRPF40B	0.428492	8.85181e-06	4.95068e-05	4.44347
snRNA_BB	WDR61	0.403056	8.86912e-06	4.95481e-05	4.44305
snRNA_BB	AC113346.2	4.25594	8.90364e-06	4.97132e-05	4.44222
snRNA_BB	ABHD18	0.319717	8.91994e-06	4.97765e-05	4.44182
snRNA_BB	FADS1	0.511587	8.95167e-06	4.99256e-05	4.44106
snRNA_BB	JPH3	0.598428	8.96313e-06	4.99617e-05	4.44078
snRNA_BB	MRE11	0.645234	9.06518e-06	5.05024e-05	4.43835
snRNA_BB	CCDC47	0.503788	9.07134e-06	5.05086e-05	4.4382
snRNA_BB	PSMG2	0.42948	9.16438e-06	5.09698e-05	4.436
snRNA_BB	PTPN13	1.51104	9.2389e-06	5.13557e-05	4.43426
snRNA_BB	PTGES3	0.296255	9.46148e-06	5.25638e-05	4.42913
snRNA_BB	SUPT16H	0.525873	9.63068e-06	5.34444e-05	4.4253
snRNA_BB	AC016907.2	1.20239	9.71187e-06	5.38352e-05	4.42349
snRNA_BB	SECISBP2L	0.376636	9.95881e-06	5.51256e-05	4.41807
snRNA_BB	FAM185A	0.417179	9.9612e-06	5.51256e-05	4.41801
snRNA_BB	EPHA8	2.32245	1.02195e-05	5.63991e-05	4.41248
snRNA_BB	TMTC1	0.708892	1.06539e-05	5.87314e-05	4.40346
snRNA_BB	FLG-AS1	0.911884	1.08691e-05	5.98519e-05	4.39912
snRNA_BB	LINC01357	1.42584	1.11159e-05	6.111e-05	4.39424
snRNA_BB	WBP2NL	0.333677	1.119e-05	6.14836e-05	4.3928
snRNA_BB	AC113386.1	1.36058	1.12029e-05	6.15205e-05	4.39255
snRNA_BB	ETFA	0.553096	1.14065e-05	6.26042e-05	4.38863
snRNA_BB	MT-CO1	0.235407	1.16568e-05	6.39078e-05	4.38391
snRNA_BB	DCAF10	0.325743	1.16973e-05	6.40948e-05	4.38316
snRNA_BB	HDAC3	0.437808	1.17233e-05	6.4202e-05	4.38267
snRNA_BB	PTGR1	0.699979	1.20289e-05	6.58396e-05	4.37706
snRNA_BB	MAST1	0.32187	1.21385e-05	6.64033e-05	4.37509
snRNA_BB	URGCP	0.315058	1.22083e-05	6.67487e-05	4.37383
snRNA_BB	MRPL19	0.464939	1.22327e-05	6.68453e-05	4.3734
snRNA_BB	AC026803.3	1.23662	1.22902e-05	6.71227e-05	4.37238
snRNA_BB	CHURC1	0.387754	1.2329e-05	6.7298e-05	4.37169
snRNA_BB	AC005740.5	1.91733	1.28149e-05	6.98361e-05	4.36324
snRNA_BB	SPDYE3	0.3899	1.28872e-05	7.0192e-05	4.36201
snRNA_BB	MIR646HG	0.60962	1.29132e-05	7.02953e-05	4.36157
snRNA_BB	SRM	0.930163	1.38303e-05	7.52465e-05	4.34654
snRNA_BB	AC008115.2	1.10368	1.39101e-05	7.56396e-05	4.34527
snRNA_BB	SIAH2	1.01937	1.3945e-05	7.57878e-05	4.34473
snRNA_BB	DROSHA	0.312345	1.41074e-05	7.65874e-05	4.34218
snRNA_BB	NAAA	1.51904	1.42384e-05	7.72568e-05	4.34015
snRNA_BB	HACL1	0.431741	1.45167e-05	7.87241e-05	4.3359
snRNA_BB	AC104806.2	0.502914	1.46896e-05	7.96182e-05	4.33329
snRNA_BB	SORT1	0.574401	1.48603e-05	8.04998e-05	4.33075
snRNA_BB	TBC1D24	0.584462	1.51343e-05	8.18954e-05	4.32672
snRNA_BB	AC015878.1	0.544978	1.51543e-05	8.19593e-05	4.32643
snRNA_BB	ITGA9	1.05369	1.52834e-05	8.2524e-05	4.32456
snRNA_BB	ATF7	0.391419	1.55432e-05	8.38813e-05	4.32085
snRNA_BB	MTOR	0.382794	1.5614e-05	8.42179e-05	4.31984
snRNA_BB	BRI3	0.358595	1.57292e-05	8.4702e-05	4.31822
snRNA_BB	PIP4P2	0.873159	1.578e-05	8.49299e-05	4.31751
snRNA_BB	GACAT2	1.43999	1.61688e-05	8.68821e-05	4.31213
snRNA_BB	AP3S2	0.44152	1.6226e-05	8.7143e-05	4.31135
snRNA_BB	AC107068.2	0.526719	1.63004e-05	8.74956e-05	4.31034
snRNA_BB	P3H4	2.10481	1.63348e-05	8.76331e-05	4.30987
snRNA_BB	CERK	0.679602	1.66305e-05	8.91236e-05	4.30591
snRNA_BB	CHD8	0.442115	1.66675e-05	8.92741e-05	4.30541
snRNA_BB	CEP128	0.446285	1.68328e-05	9.01111e-05	4.30323
snRNA_BB	APPL1	0.317208	1.71856e-05	9.19508e-05	4.29863
snRNA_BB	RPGRIP1	2.9264	1.72783e-05	9.23973e-05	4.29744
snRNA_BB	IQCB1	0.477292	1.73542e-05	9.27538e-05	4.29647
snRNA_BB	AMOTL1	1.83438	1.73645e-05	9.27589e-05	4.29634
snRNA_BB	DLGAP1-AS5	1.12708	1.7521e-05	9.34856e-05	4.29434
snRNA_BB	EFCAB13	0.523382	1.75286e-05	9.34856e-05	4.29425
snRNA_BB	SLC26A11	0.685308	1.75816e-05	9.37183e-05	4.29358
snRNA_BB	A2ML1-AS1	0.563366	1.76531e-05	9.40494e-05	4.29268
snRNA_BB	ST8SIA1	0.509416	1.78766e-05	9.51227e-05	4.28988
snRNA_BB	CBWD1	0.343755	1.78831e-05	9.51227e-05	4.2898
snRNA_BB	AC087500.1	0.643597	1.7976e-05	9.55662e-05	4.28865
snRNA_BB	ATG9B	1.15255	1.82776e-05	9.71178e-05	4.28496
snRNA_BB	NDUFAF2	0.421142	1.83071e-05	9.72228e-05	4.2846
snRNA_BB	GRIN1	1.70951	1.83491e-05	9.73942e-05	4.28409
snRNA_BB	BTBD10	0.543198	1.84566e-05	9.79129e-05	4.28279
snRNA_BB	POLE2	0.528161	1.86642e-05	9.8962e-05	4.2803
snRNA_BB	H2AFY2	0.560363	1.9187e-05	0.00010168	4.27415
snRNA_BB	RECK	0.387654	1.94511e-05	0.000102916	4.2711
snRNA_BB	FAM151B	1.17644	1.94827e-05	0.000103028	4.27074
snRNA_BB	DPH6	0.220095	1.97578e-05	0.000104428	4.26761
snRNA_BB	MTHFD2L	0.430508	2.04428e-05	0.000107935	4.26
snRNA_BB	AC108519.1	0.490972	2.06661e-05	0.000109056	4.25757
snRNA_BB	ZNF429	0.457589	2.06926e-05	0.000109138	4.25728
snRNA_BB	AC096576.3	0.407018	2.112e-05	0.000111333	4.25271
snRNA_BB	WDR19	0.546173	2.12485e-05	0.000111952	4.25135
snRNA_BB	ZRANB3	0.285055	2.13538e-05	0.000112448	4.25024
snRNA_BB	GP6	0.763472	2.17053e-05	0.000114239	4.24658
snRNA_BB	JAKMIP3	1.08348	2.18221e-05	0.000114793	4.24538
snRNA_BB	TAZ	0.500225	2.21685e-05	0.000116492	4.24185
snRNA_BB	SNHG25	0.592241	2.23812e-05	0.000117548	4.23971
snRNA_BB	MTM1	0.56142	2.2477e-05	0.000117989	4.23875
snRNA_BB	ATP10A	2.82271	2.25644e-05	0.000118386	4.23788
snRNA_BB	ANKS3	0.50469	2.29445e-05	0.000120191	4.23412
snRNA_BB	TSBP1-AS1	1.53307	2.36496e-05	0.00012382	4.22732
snRNA_BB	AC104781.2	0.491331	2.37333e-05	0.000124193	4.22652
snRNA_BB	FBLN7	0.73888	2.40059e-05	0.000125554	4.22395
snRNA_BB	MAML3	0.303241	2.47279e-05	0.000129195	4.21727
snRNA_BB	AC091887.1	0.91692	2.47465e-05	0.000129225	4.2171
snRNA_BB	MPZL1	0.791096	2.4942e-05	0.000130109	4.21532
snRNA_BB	HIST1H2BD	1.0888	2.54308e-05	0.00013259	4.21094
snRNA_BB	SNX27	0.321166	2.58064e-05	0.000134479	4.20763
snRNA_BB	SULT1C4	1.45359	2.60894e-05	0.000135882	4.20516
snRNA_BB	AC025809.1	0.321718	2.6408e-05	0.00013747	4.20242
snRNA_BB	PPARG	1.44051	2.69862e-05	0.000140261	4.19751
snRNA_BB	AC018816.1	0.892917	2.72494e-05	0.000141555	4.19531
snRNA_BB	C1QTNF7	0.360628	2.75661e-05	0.000143052	4.19269
snRNA_BB	ATF1	0.618932	2.80908e-05	0.000145659	4.18842
snRNA_BB	C2orf72	3.25214	2.82959e-05	0.000146611	4.18676
snRNA_BB	TMEM220	1.42087	2.89168e-05	0.000149673	4.18183
snRNA_BB	STT3B	0.190629	2.91593e-05	0.000150772	4.17993
snRNA_BB	FNBP1L	0.41616	2.96019e-05	0.000152981	4.17651
snRNA_BB	AZIN2	0.789448	3.01283e-05	0.000155621	4.17249
snRNA_BB	CTDSPL	0.516506	3.07064e-05	0.000158444	4.16816
snRNA_BB	USP25	0.396965	3.07346e-05	0.000158508	4.16795
snRNA_BB	LINC00685	0.776046	3.09834e-05	0.000159626	4.16612
snRNA_BB	RNF213-AS1	0.767695	3.18571e-05	0.000163958	4.15977
snRNA_BB	C14orf39	1.75208	3.19812e-05	0.000164512	4.15888
snRNA_BB	AL158077.2	1.44297	3.21285e-05	0.000165185	4.15783
snRNA_BB	ARSB	0.673005	3.23449e-05	0.000166212	4.1563
snRNA_BB	LMNA	1.27462	3.33828e-05	0.000171457	4.14907
snRNA_BB	PIP5K1B	0.682068	3.37855e-05	0.000173437	4.14632
snRNA_BB	MT-ND5	0.384145	3.51797e-05	0.000180501	4.13705
snRNA_BB	EPG5	0.337199	3.63503e-05	0.000186108	4.12953
snRNA_BB	ZNF551	0.589626	3.63655e-05	0.000186108	4.12944
snRNA_BB	C12orf40	0.826085	3.6686e-05	0.000187652	4.12742
snRNA_BB	PIK3CA	0.337191	3.72698e-05	0.000190541	4.12378
snRNA_BB	MIR4527HG	3.59923	3.77153e-05	0.00019272	4.12105
snRNA_BB	TTLL11	0.64789	3.79871e-05	0.000194009	4.11939
snRNA_BB	FAM216A	0.740902	3.85982e-05	0.00019703	4.11571
snRNA_BB	GALNT17	0.651371	3.88636e-05	0.000198183	4.11413
snRNA_BB	RRAGD	0.619597	3.89843e-05	0.000198697	4.11342
snRNA_BB	L3MBTL4	1.58089	3.92732e-05	0.000200067	4.11171
snRNA_BB	SCAI	0.171278	3.93434e-05	0.000200323	4.1113
snRNA_BB	BCKDHB	0.360171	3.97928e-05	0.000202508	4.10868
snRNA_BB	DENND6A	0.303462	4.02372e-05	0.000204665	4.10611
snRNA_BB	PPFIA3	0.466998	4.1724e-05	0.00021212	4.09772
snRNA_BB	DCAKD	0.469278	4.17739e-05	0.000212266	4.09744
snRNA_BB	MAK	0.284634	4.22339e-05	0.000214494	4.09491
snRNA_BB	CEP95	0.312633	4.22788e-05	0.000214613	4.09466
snRNA_BB	NUP133	0.363599	4.3126e-05	0.000218803	4.09006
snRNA_BB	MFSD14A	0.443534	4.436e-05	0.000224721	4.08351
snRNA_BB	TEAD3	0.938477	4.48624e-05	0.000227152	4.0809
snRNA_BB	RABL6	0.348688	4.62813e-05	0.000234217	4.07365
snRNA_BB	ACER3	0.300581	4.67627e-05	0.000236533	4.07124
snRNA_BB	NOP58	0.35271	4.69245e-05	0.000237232	4.07044
snRNA_BB	LINC00960	0.453633	4.70049e-05	0.000237519	4.07004
snRNA_BB	AC139887.2	0.397441	4.75611e-05	0.000240086	4.0673
snRNA_BB	SV2A	0.351245	4.82742e-05	0.00024344	4.06383
snRNA_BB	NINL	0.758528	4.90276e-05	0.000247115	4.06021
snRNA_BB	AMN1	0.440802	5.06266e-05	0.000254789	4.05272
snRNA_BB	CEMIP	0.541729	5.11614e-05	0.000257351	4.05026
snRNA_BB	POLA1	0.279035	5.19177e-05	0.000261024	4.04682
snRNA_BB	RNASEL	1.3483	5.38114e-05	0.000270138	4.03842
snRNA_BB	AC022433.1	2.25737	5.46976e-05	0.000274448	4.03459
snRNA_BB	AP002336.2	0.368371	5.48976e-05	0.000275314	4.03373
snRNA_BB	SGF29	1.21211	5.52341e-05	0.000276863	4.0323
snRNA_BB	NUP210	0.583074	5.58595e-05	0.000279577	4.02965
snRNA_BB	ANKRD16	0.533131	5.66274e-05	0.000283278	4.02644
snRNA_BB	SLC22A15	1.18194	5.9709e-05	0.000297949	4.01396
snRNA_BB	HSP90B1	0.445736	6.08859e-05	0.00030367	4.00935
snRNA_BB	MT-ATP6	0.186264	6.10466e-05	0.000304171	4.00873
snRNA_BB	AC073475.1	0.901048	6.10471e-05	0.000304171	4.00873
snRNA_BB	CNTLN	0.587697	6.14018e-05	0.000305786	4.00736
snRNA_BB	OLFM1	1.00531	6.14837e-05	0.000306041	4.00704
snRNA_BB	GLYR1	0.334331	6.24711e-05	0.000310801	4.00328
snRNA_BB	GATAD1	0.345715	6.28046e-05	0.000312305	4.00202
snRNA_BB	AC090945.1	1.48457	6.40748e-05	0.000318147	3.99728
snRNA_BB	TMEM14B	0.222727	6.42849e-05	0.000319032	3.9965
snRNA_BB	ZCCHC7	0.179323	6.54735e-05	0.000324769	3.99216
snRNA_BB	IRF9	1.36413	6.56956e-05	0.000325709	3.99136
snRNA_BB	NT5C3A	0.429718	6.60539e-05	0.000327323	3.99007
snRNA_BB	DNAH10	1.29658	6.60931e-05	0.000327356	3.98993
snRNA_BB	FAM124A	0.557448	6.74876e-05	0.000334097	3.98497
snRNA_BB	SCP2	0.3113	6.8223e-05	0.000337571	3.9824
snRNA_BB	DPP8	0.388183	6.84086e-05	0.000338321	3.98175
snRNA_BB	SPG7	0.287697	6.84483e-05	0.00033835	3.98162
snRNA_BB	DIAPH1	0.606601	6.92592e-05	0.000341852	3.97882
snRNA_BB	AC097460.1	0.794959	7.18205e-05	0.00035397	3.97017
snRNA_BB	CRYL1	0.805469	7.31193e-05	0.000360194	3.9659
snRNA_BB	NME9	0.569786	7.36217e-05	0.00036249	3.96427
snRNA_BB	SUMF2	0.729425	7.61568e-05	0.000374603	3.95618
snRNA_BB	AC008543.1	0.955231	7.65178e-05	0.000376009	3.95505
snRNA_BB	SPICE1	0.689721	7.79982e-05	0.000382907	3.95047
snRNA_BB	MCCC1	0.39369	7.90152e-05	0.000387709	3.94737
snRNA_BB	TMEM243	1.30891	7.91677e-05	0.000388267	3.94691
snRNA_BB	SSH1	0.467116	8.04815e-05	0.000394517	3.94296
snRNA_BB	DFFB	1.00711	8.107e-05	0.000397207	3.94121
snRNA_BB	HBS1L	0.295635	8.14576e-05	0.000398911	3.94007
snRNA_BB	CCDC65	0.684945	8.3503e-05	0.000408727	3.93412
snRNA_BB	LINC02256	0.487787	8.3877e-05	0.000410357	3.93304
snRNA_BB	AC007566.1	0.4731	8.41364e-05	0.000411425	3.9323
snRNA_BB	SYCP3	1.37459	8.46374e-05	0.000413673	3.93087
snRNA_BB	RNF170	0.346357	8.46927e-05	0.000413741	3.93072
snRNA_BB	DHX57	0.428197	8.51266e-05	0.000415657	3.92949
snRNA_BB	MTMR12	0.430908	8.56718e-05	0.000417911	3.92795
snRNA_BB	ZNF350	0.806015	8.74911e-05	0.000426578	3.9229
snRNA_BB	DDX50	0.288891	8.79175e-05	0.000428448	3.92172
snRNA_BB	MOB1B	1.15696	8.83726e-05	0.000430456	3.92048
snRNA_BB	ARFGEF2	0.309547	8.93561e-05	0.000435035	3.91781
snRNA_BB	CLUAP1	0.558174	8.95725e-05	0.000435876	3.91723
snRNA_BB	TBC1D15	0.370628	8.98445e-05	0.000436928	3.9165
snRNA_BB	TMX2	0.339933	8.98761e-05	0.000436928	3.91641
snRNA_BB	NHLRC3	0.428964	9.02804e-05	0.00043868	3.91533
snRNA_BB	RAB34	3.70307	9.16439e-05	0.000445089	3.91171
snRNA_BB	YARS	0.434283	9.34003e-05	0.000453399	3.90713
snRNA_BB	MYO7A	0.583224	9.44957e-05	0.000458272	3.90431
snRNA_BB	TFAP2E	0.308713	9.47189e-05	0.00045891	3.90374
snRNA_BB	CCDC14	0.339623	9.54676e-05	0.000462093	3.90183
snRNA_BB	CCDC148-AS1	1.26257	9.99199e-05	0.000483171	3.89079
snRNA_BB	NCK1	0.581893	0.000100135	0.000483976	3.89027
snRNA_BB	PPP1R21	0.356398	0.000102209	0.000493526	3.88529
snRNA_BB	CMIP	0.279842	0.000102333	0.000493886	3.88499
snRNA_BB	APBA1	0.241263	0.000103755	0.000500026	3.88164
snRNA_BB	AC025682.1	0.418531	0.000106161	0.000511126	3.87606
snRNA_BB	NIPAL3	0.346429	0.000108421	0.000521745	3.87093
snRNA_BB	SHC2	1.16378	0.00010881	0.000523123	3.87006
snRNA_BB	JADE1	0.507153	0.000113895	0.000547047	3.85891
snRNA_BB	EPB41L2	0.226335	0.000114489	0.000549634	3.85764
snRNA_BB	GYS1	0.55666	0.000114916	0.000551419	3.85673
snRNA_BB	MED12L	0.298137	0.000115172	0.000552383	3.85618
snRNA_BB	ASAP1	0.202426	0.00011629	0.000557213	3.85382
snRNA_BB	PRRT2	0.273553	0.000117583	0.000563135	3.85111
snRNA_BB	ZBTB38	0.317987	0.000119424	0.000571681	3.8473
snRNA_BB	CHFR	0.337277	0.000120473	0.000576427	3.84516
snRNA_BB	TRNAU1AP	0.369339	0.000120711	0.00057729	3.84468
snRNA_BB	HSPA1B	1.43519	0.000121037	0.000578573	3.84402
snRNA_BB	SPAST	0.35213	0.000121245	0.000579288	3.8436
snRNA_BB	NDUFV2-AS1	0.662389	0.000121469	0.000580083	3.84314
snRNA_BB	USP28	0.317472	0.000121564	0.000580258	3.84295
snRNA_BB	KATNAL2	0.432641	0.000121758	0.000580908	3.84256
snRNA_BB	PDK3	0.377403	0.000121885	0.000581237	3.8423
snRNA_BB	PKNOX2	0.722494	0.000122127	0.000582113	3.84182
snRNA_BB	TRMT61B	0.514829	0.000123067	0.000586311	3.83994
snRNA_BB	PPFIBP2	1.27755	0.000123964	0.000590303	3.83815
snRNA_BB	ARPC2	0.375315	0.000126052	0.000599962	3.83405
snRNA_BB	DDX21	0.808035	0.000126129	0.000600044	3.8339
snRNA_BB	AC124852.1	0.757421	0.000126707	0.000602508	3.83277
snRNA_BB	SGK3	0.366929	0.000127229	0.000604701	3.83176
snRNA_BB	LINC00903	1.41105	0.000130829	0.000621218	3.82489
snRNA_BB	BAHCC1	0.324078	0.00013414	0.000636338	3.81873
snRNA_BB	AC104827.1	0.568406	0.000135888	0.000644322	3.81554
snRNA_BB	RAB11FIP4	2.04683	0.000139181	0.000659002	3.80962
snRNA_BB	UBXN2B	0.527504	0.00013937	0.000659315	3.80928
snRNA_BB	WDR73	0.381266	0.000139379	0.000659315	3.80927
snRNA_BB	HDHD5	0.702409	0.000141199	0.000666977	3.80606
snRNA_BB	CORO1C	0.89563	0.000142317	0.000671942	3.80411
snRNA_BB	RGPD4	0.920517	0.000145167	0.000684751	3.79919
snRNA_BB	CEP78	0.482158	0.00014616	0.000689111	3.7975
snRNA_BB	TAF1B	0.324778	0.000148916	0.000701442	3.79287
snRNA_BB	GPX4	0.26535	0.00015007	0.000706212	3.79095
snRNA_BB	AC073343.2	0.564579	0.000150942	0.000709982	3.78951
snRNA_BB	STEAP2	0.792028	0.000151708	0.000713249	3.78826
snRNA_BB	POR	0.500933	0.000157097	0.000737542	3.77957
snRNA_BB	PXN	0.713739	0.000157211	0.000737736	3.77939
snRNA_BB	KDM3A	0.354946	0.000158397	0.000742948	3.77752
snRNA_BB	C2orf27A	0.806723	0.000159271	0.0007467	3.77615
snRNA_BB	PRIM1	0.944574	0.000160453	0.000751889	3.77431
snRNA_BB	PITPNM1	0.772758	0.000164394	0.000769633	3.76825
snRNA_BB	PCGF3	0.483403	0.000166931	0.000780837	3.76443
snRNA_BB	PDIA3	0.335618	0.000166943	0.000780837	3.76441
snRNA_BB	DNAH9	1.14499	0.000170533	0.000797257	3.75909
snRNA_BB	DZANK1	0.641242	0.000172794	0.00080707	3.75579
snRNA_BB	SELENOI	0.383366	0.000173317	0.000809134	3.75504
snRNA_BB	YES1	0.670147	0.000174095	0.00081213	3.75391
snRNA_BB	CREBRF	0.35283	0.000174121	0.00081213	3.75388
snRNA_BB	SUGCT	0.625023	0.000174425	0.000813169	3.75344
snRNA_BB	ZNF569	0.398057	0.000175521	0.000817897	3.75187
snRNA_BB	CCDC149	0.611993	0.000179906	0.000837943	3.74568
snRNA_BB	ZFYVE26	0.565781	0.000184351	0.000857845	3.73955
snRNA_BB	MRNIP	0.479757	0.000188343	0.000876013	3.73416
snRNA_BB	GABRR2	0.0565138	0.000188505	0.000876361	3.73394
snRNA_BB	ADGRL3	0.484624	0.000190368	0.00088461	3.73147
snRNA_BB	FGF2	2.6394	0.000191275	0.000888411	3.73027
snRNA_BB	DAP3	0.308619	0.000192956	0.000894974	3.72806
snRNA_BB	SMARCAD1	0.304353	0.000194963	0.000903861	3.72546
snRNA_BB	MARCH4	0.892532	0.000196919	0.000912505	3.72294
snRNA_BB	SPIRE2	0.696114	0.00020417	0.00094567	3.7138
snRNA_BB	ATP13A2	0.614714	0.000206729	0.000957078	3.71065
snRNA_BB	AC068888.1	0.424662	0.000208212	0.000963499	3.70884
snRNA_BB	LRRC6	1.22934	0.000211358	0.000976252	3.70504
snRNA_BB	TEX9	0.448414	0.000212481	0.000980585	3.7037
snRNA_BB	SEC13	0.425159	0.000212493	0.000980585	3.70368
snRNA_BB	GXYLT2	2.17703	0.000212873	0.000981889	3.70323
snRNA_BB	ODR4	0.336381	0.000221781	0.00102062	3.69282
snRNA_BB	STK4	0.530054	0.000223602	0.00102853	3.69074
snRNA_BB	FBXO27	0.738165	0.000226784	0.00104221	3.68715
snRNA_BB	SSR1	0.297094	0.000227777	0.00104533	3.68603
snRNA_BB	ELMSAN1	0.710079	0.000240878	0.00110393	3.67177
snRNA_BB	MINAR1	3.01787	0.000241503	0.00110629	3.67111
snRNA_BB	ACTR10	0.29109	0.000242769	0.00111158	3.66977
snRNA_BB	CACNA1E	3.52693	0.000244636	0.00111962	3.66781
snRNA_BB	FAM27C	0.463987	0.000245607	0.00112354	3.6668
snRNA_BB	KHDC1	0.372165	0.000246003	0.00112435	3.66639
snRNA_BB	MRPS31	0.358418	0.000246007	0.00112435	3.66638
snRNA_BB	UBN1	0.407933	0.000248809	0.0011356	3.66348
snRNA_BB	GNS	0.515242	0.000251838	0.00114837	3.66038
snRNA_BB	CFAP36	0.39999	0.000252567	0.00115117	3.65964
snRNA_BB	SLC16A14	1.01138	0.000255686	0.00116432	3.6565
snRNA_BB	PARD6B	0.464557	0.00025612	0.00116577	3.65606
snRNA_BB	AC008731.1	0.501723	0.00025884	0.00117762	3.65335
snRNA_BB	AL117381.1	0.95404	0.000261559	0.0011889	3.65067
snRNA_BB	PLCXD1	1.16473	0.000262124	0.00119093	3.65011
snRNA_BB	AC006059.1	0.30324	0.000265758	0.00120525	3.64658
snRNA_BB	POU2F2	0.319143	0.000270891	0.00122686	3.64166
snRNA_BB	BRI3BP	0.753199	0.00027252	0.00123368	3.64011
snRNA_BB	RPL18	0.236877	0.000274954	0.00124414	3.63782
snRNA_BB	ZNF439	0.432261	0.000277437	0.0012548	3.6355
snRNA_BB	FAM106A	0.663017	0.000277708	0.00125546	3.63525
snRNA_BB	HCG17	0.315873	0.000279117	0.00126069	3.63395
snRNA_BB	BLZF1	0.513838	0.000280541	0.00126598	3.63264
snRNA_BB	LINC02693	0.598276	0.000283378	0.00127821	3.63004
snRNA_BB	STAC2	1.47437	0.000287199	0.00129427	3.62658
snRNA_BB	IFT140	0.901695	0.000291059	0.00131031	3.62313
snRNA_BB	RAB5A	0.404013	0.000294079	0.00132289	3.62046
snRNA_BB	CAMK4	0.155595	0.000294778	0.00132544	3.61985
snRNA_BB	PROS1	2.30337	0.000295484	0.00132802	3.61923
snRNA_BB	DCAF5	0.288551	0.000299975	0.0013476	3.61532
snRNA_BB	HLA-B	0.756795	0.000300759	0.00135051	3.61464
snRNA_BB	AFAP1	2.17337	0.000303351	0.00136102	3.61242
snRNA_BB	USP10	0.338693	0.000303371	0.00136102	3.6124
snRNA_BB	PCED1B	0.580256	0.000309787	0.00138918	3.60697
snRNA_BB	ARMCX5-GPRASP2	0.401348	0.000310961	0.00139382	3.60599
snRNA_BB	AC011455.6	1.03188	0.000311162	0.00139409	3.60583
snRNA_BB	LINC01289	1.24511	0.000311408	0.00139457	3.60562
snRNA_BB	XPNPEP3	0.388245	0.000316134	0.00141511	3.60171
snRNA_BB	ZMYM6	0.384168	0.000316656	0.00141681	3.60128
snRNA_BB	GPLD1	0.4812	0.000320332	0.00143202	3.59828
snRNA_BB	MT-ND3	0.215975	0.000320343	0.00143202	3.59827
snRNA_BB	TFB1M	0.271074	0.000320743	0.00143317	3.59794
snRNA_BB	TCTEX1D2	0.462605	0.000331902	0.00148237	3.58904
snRNA_BB	XPC	0.459274	0.000333173	0.00148738	3.58804
snRNA_BB	DACT3	1.36967	0.000336318	0.00150075	3.58559
snRNA_BB	SFXN5	0.492779	0.000337196	0.001504	3.58491
snRNA_BB	IL10RB	1.02186	0.000344582	0.00153595	3.57925
snRNA_BB	ITFG2	0.265747	0.000345465	0.00153882	3.57858
snRNA_BB	CA13	1.51959	0.000345997	0.0015405	3.57818
snRNA_BB	RCL1	0.690355	0.00034799	0.00154869	3.57668
snRNA_BB	SLC1A4	0.930871	0.000356281	0.00158488	3.57051
snRNA_BB	CLHC1	0.486735	0.00035806	0.00159208	3.56921
snRNA_BB	LINC01409	0.528192	0.000359839	0.00159928	3.56791
snRNA_BB	SRGAP2B	0.3743	0.000366552	0.00162767	3.56306
snRNA_BB	AC009899.1	0.768576	0.000368083	0.00163374	3.56197
snRNA_BB	SHOC1	0.286069	0.000371385	0.00164767	3.55963
snRNA_BB	AC011447.3	1.44443	0.000376699	0.0016705	3.55589
snRNA_BB	TENT4B	0.2443	0.000377806	0.00167454	3.55512
snRNA_BB	COL5A1	0.523413	0.000377944	0.00167454	3.55502
snRNA_BB	AL512662.2	0.778701	0.000383066	0.00169649	3.55148
snRNA_BB	ZC3H12B	0.514192	0.000383931	0.00169956	3.55089
snRNA_BB	CHCHD10	0.314761	0.000387165	0.00171236	3.54868
snRNA_BB	HPRT1	0.2529	0.00039095	0.00172757	3.54612
snRNA_BB	RAPGEFL1	0.898837	0.000393694	0.00173865	3.54427
snRNA_BB	ACOT9	1.28268	0.000393804	0.00173865	3.5442
snRNA_BB	UBAP2	0.379443	0.000394534	0.0017411	3.54371
snRNA_BB	CYB5B	0.565111	0.00039874	0.00175734	3.54092
snRNA_BB	RALY	0.366585	0.000401408	0.00176832	3.53916
snRNA_BB	AP001266.2	0.479469	0.000402208	0.00177106	3.53863
snRNA_BB	PIGZ	0.676351	0.000402726	0.00177256	3.53829
snRNA_BB	ZDHHC5	0.491226	0.000412077	0.00181212	3.53223
snRNA_BB	AC021231.1	0.498988	0.000413738	0.00181863	3.53116
snRNA_BB	EFCAB6	0.512448	0.000414668	0.00182192	3.53057
snRNA_BB	NSMAF	0.404424	0.000415158	0.00182327	3.53026
snRNA_BB	SLC9B2	0.555325	0.000417328	0.00183199	3.52888
snRNA_BB	ST13	0.315358	0.00041888	0.001838	3.52789
snRNA_BB	LRP11	0.491171	0.000423662	0.00185735	3.52489
snRNA_BB	GMCL1	0.479961	0.000426985	0.0018711	3.52282
snRNA_BB	AC117528.1	1.62382	0.00042994	0.0018824	3.52099
snRNA_BB	AL158055.1	1.02748	0.000434633	0.00190128	3.51811
snRNA_BB	RAB12	0.431911	0.00043676	0.00190975	3.51681
snRNA_BB	NQO2	0.463812	0.000438704	0.00191741	3.51563
snRNA_BB	AZIN1	0.357475	0.000441203	0.00192749	3.51413
snRNA_BB	STAP2	1.56383	0.00044412	0.00193939	3.51238
snRNA_BB	SLC9A5	1.61477	0.000446266	0.00194791	3.51109
snRNA_BB	RSBN1	0.387669	0.000449669	0.00196191	3.50907
snRNA_BB	RMDN2	0.697395	0.000454958	0.00198325	3.50596
snRNA_BB	RIMKLB	0.302434	0.000455206	0.00198347	3.50582
snRNA_BB	MT-CYB	0.184834	0.000458444	0.00199671	3.50393
snRNA_BB	AKR1E2	0.671571	0.000459343	0.00199975	3.50341
snRNA_BB	BBOF1	0.690658	0.000470357	0.00204503	3.49709
snRNA_BB	PLEKHA7	0.582357	0.000476484	0.00207077	3.49364
snRNA_BB	FARSB	0.370086	0.000478069	0.00207585	3.49275
snRNA_BB	BDH2	2.30471	0.000482566	0.00209266	3.49025
snRNA_BB	LRRCC1	1.69978	0.000483022	0.00209372	3.49
snRNA_BB	AACS	0.793511	0.000486309	0.00210615	3.48819
snRNA_BB	GABBR1	0.551927	0.000487363	0.0021098	3.48761
snRNA_BB	HAUS4	1.49971	0.000490874	0.00212407	3.48569
snRNA_BB	ATP11B	0.264378	0.000501303	0.00216826	3.48006
snRNA_BB	AC005670.3	0.29833	0.000509452	0.00220256	3.47574
snRNA_BB	WDR27	0.308839	0.000513181	0.00221772	3.47378
snRNA_BB	SMC6	0.414122	0.000520257	0.00224733	3.4701
snRNA_BB	SPATA7	0.342772	0.000521158	0.00225025	3.46964
snRNA_BB	MIR4435-2HG	0.984354	0.00052226	0.00225404	3.46907
snRNA_BB	RNF24	0.361239	0.000526303	0.00227051	3.467
snRNA_BB	SLC38A9	0.432387	0.000532565	0.00229406	3.46382
snRNA_BB	ESR2	1.42527	0.000532595	0.00229406	3.4638
snRNA_BB	POMGNT2	0.91223	0.000542323	0.00233458	3.45893
snRNA_BB	SYCP2L	0.559031	0.000544187	0.0023416	3.45801
snRNA_BB	SLC27A1	0.663504	0.000544875	0.00234314	3.45767
snRNA_BB	MCCC2	0.440815	0.000545015	0.00234314	3.4576
snRNA_BB	PHF6	0.464504	0.000548045	0.00235516	3.4561
snRNA_BB	AC010615.2	0.758411	0.00055296	0.00237322	3.4537
snRNA_BB	ASCC1	0.301434	0.000559755	0.00240135	3.4504
snRNA_BB	SENP1	0.578741	0.00056351	0.00241643	3.4486
snRNA_BB	RUFY1	0.324579	0.000565544	0.00242307	3.44762
snRNA_BB	TMEM107	1.00635	0.000567446	0.00243018	3.44672
snRNA_BB	DNAJC7	0.29577	0.000570811	0.00244354	3.44512
snRNA_BB	FBXO10	0.566479	0.000573098	0.00245228	3.44404
snRNA_BB	ARL5C	0.283327	0.000580194	0.00247946	3.44071
snRNA_BB	ZC3H7B	0.560452	0.000585028	0.0024984	3.43846
snRNA_BB	ZCWPW1	0.775675	0.000590995	0.00252131	3.43571
snRNA_BB	AC093158.1	1.55384	0.000597072	0.00254506	3.43294
snRNA_BB	FAM228B	0.279857	0.000598808	0.00255138	3.43215
snRNA_BB	GNG7	0.947415	0.000600586	0.00255786	3.43135
snRNA_BB	LINC02615	1.02229	0.000601457	0.00256048	3.43096
snRNA_BB	ZNF782	0.352889	0.000606614	0.00258024	3.42864
snRNA_BB	KCTD13	0.506033	0.000607338	0.00258222	3.42832
snRNA_BB	AL391152.1	1.61124	0.000611659	0.00259847	3.42639
snRNA_BB	KRIT1	0.295623	0.00061168	0.00259847	3.42638
snRNA_BB	USP20	0.546332	0.000614211	0.00260811	3.42526
snRNA_BB	ARMH4	0.276026	0.00061602	0.00261469	3.42446
snRNA_BB	ILKAP	0.27894	0.00062243	0.00263965	3.42165
snRNA_BB	NAT10	0.569702	0.000624386	0.00264683	3.42079
snRNA_BB	SLC16A3	0.469269	0.000637085	0.00269759	3.41531
snRNA_BB	ZNF410	0.487134	0.000637171	0.00269759	3.41528
snRNA_BB	TAGLN3	0.354308	0.00064091	0.00271227	3.41368
snRNA_BB	PRKAR1B	0.565431	0.00064368	0.00272284	3.41251
snRNA_BB	PPFIA4	0.552732	0.000646941	0.00273548	3.41113
snRNA_BB	AC068282.1	0.261952	0.00065481	0.00276758	3.40783
snRNA_BB	ATF2	0.259438	0.000661201	0.00279341	3.40518
snRNA_BB	SLC35F5	0.281786	0.000662395	0.00279727	3.40469
snRNA_BB	ITGA3	0.598244	0.000662825	0.00279791	3.40451
snRNA_BB	WNK3	0.387197	0.000664753	0.00280368	3.40372
snRNA_BB	ELOA-AS1	0.375206	0.000676219	0.00285084	3.39904
snRNA_BB	MEAK7	0.809753	0.000684301	0.00288369	3.39579
snRNA_BB	TMEM176A	0.781651	0.000686447	0.00289152	3.39494
snRNA_BB	NCOA3	0.300309	0.00068778	0.00289592	3.3944
snRNA_BB	CANX	0.250356	0.000692332	0.00291385	3.3926
snRNA_BB	ZNF618	0.493026	0.000692854	0.00291483	3.39239
snRNA_BB	XPO5	0.538622	0.000699181	0.0029402	3.3899
snRNA_BB	SMAD4	0.31652	0.0007002	0.00294304	3.3895
snRNA_BB	ZNF789	0.368247	0.000700443	0.00294304	3.38941
snRNA_BB	B9D1	0.767102	0.000701986	0.00294705	3.3888
snRNA_BB	PPA1	0.257145	0.000704459	0.00295619	3.38784
snRNA_BB	CEP76	0.645272	0.000714236	0.00299596	3.38406
snRNA_BB	EIF3B	0.341685	0.000715091	0.00299828	3.38373
snRNA_BB	SCRN1	0.295741	0.000717403	0.00300672	3.38284
snRNA_BB	DTX1	1.9993	0.000719644	0.00301485	3.38198
snRNA_BB	CD4	1.04047	0.000737421	0.00308287	3.37527
snRNA_BB	ZNF528-AS1	0.4721	0.00074081	0.00309574	3.37401
snRNA_BB	TXNRD1	0.435806	0.000758848	0.00316847	3.36738
snRNA_BB	TAMM41	0.338659	0.000766465	0.0031985	3.36463
snRNA_BB	MORN4	0.70926	0.00076668	0.0031985	3.36455
snRNA_BB	AC016590.1	0.431272	0.000770374	0.00321257	3.36323
snRNA_BB	EIF2S2	0.444618	0.000770923	0.00321352	3.36303
snRNA_BB	SAMD8	0.438754	0.000772192	0.00321747	3.36258
snRNA_BB	LRRIQ1	0.977557	0.000772562	0.00321767	3.36244
snRNA_BB	ZC4H2	0.416925	0.000773346	0.00321959	3.36216
snRNA_BB	SHPK	0.687235	0.000775414	0.00322686	3.36143
snRNA_BB	SLC25A23	0.722525	0.000776483	0.00322996	3.36104
snRNA_BB	ZNF337-AS1	0.340589	0.00077796	0.00323476	3.36052
snRNA_BB	MFSD8	0.319298	0.000780922	0.00324573	3.35947
snRNA_BB	SLC30A5	0.438692	0.000788789	0.0032757	3.3567
snRNA_BB	TSPOAP1-AS1	0.530469	0.000795444	0.00330197	3.35438
snRNA_BB	GTF2E2	0.526954	0.000806704	0.00334732	3.35048
snRNA_BB	AC007216.4	0.383685	0.00080904	0.00335562	3.34968
snRNA_BB	LINC02175	0.716751	0.000816027	0.0033832	3.3473
snRNA_BB	KLHL22	0.382289	0.000826556	0.00342543	3.34375
snRNA_BB	VKORC1	0.75421	0.000832827	0.00344999	3.34165
snRNA_BB	TMSB15B-AS1	2.70006	0.00084912	0.00351602	3.33627
snRNA_BB	FOXP2	3.24805	0.000856883	0.0035467	3.33373
snRNA_BB	ARHGAP44	0.221659	0.000860914	0.00356191	3.33243
snRNA_BB	B4GALNT4	0.575991	0.000862956	0.00356741	3.33177
snRNA_BB	SUCLG2-AS1	1.27191	0.000875161	0.00361487	3.32786
snRNA_BB	CARS	0.730386	0.000884148	0.00364898	3.32501
snRNA_BB	RPAP3	0.551481	0.000888061	0.00366258	3.32378
snRNA_BB	AARS	0.424899	0.000907426	0.00373888	3.31776
snRNA_BB	GEMIN5	0.617982	0.00090827	0.00374082	3.3175
snRNA_BB	ARMC2	0.350014	0.000921047	0.00379188	3.3136
snRNA_BB	ANKRD6	1.11126	0.000924136	0.00380303	3.31266
snRNA_BB	FAM182A	0.902309	0.000929848	0.00382496	3.31094
snRNA_BB	DGCR2	0.433201	0.000933709	0.00383926	3.30978
snRNA_BB	FBXO17	1.03981	0.00094706	0.00388941	3.3058
snRNA_BB	NCEH1	0.653275	0.000947071	0.00388941	3.3058
snRNA_BB	SPATA5	0.277896	0.000949049	0.00389593	3.30521
snRNA_BB	SCD	1.65079	0.00095287	0.00390965	3.30408
snRNA_BB	HILPDA	1.04608	0.000953173	0.00390965	3.304
snRNA_BB	SLF2	0.268758	0.000956993	0.00392371	3.30287
snRNA_BB	AC092674.1	2.37297	0.000959	0.00392914	3.30229
snRNA_BB	POM121C	0.265808	0.000959847	0.00392914	3.30204
snRNA_BB	AAMDC	0.287735	0.000959888	0.00392914	3.30203
snRNA_BB	LRP4	1.81725	0.000970973	0.00397289	3.29881
snRNA_BB	AGPAT5	0.409644	0.000974277	0.00398477	3.29785
snRNA_BB	DGLUCY	0.484034	0.000980632	0.00400913	3.29603
snRNA_BB	DHX34	0.612328	0.000995344	0.00406595	3.29184
snRNA_BB	MYL6B	0.473847	0.000997176	0.00406991	3.29132
snRNA_BB	CXCL13	2.29596	0.000997535	0.00406991	3.29122
snRNA_BB	SIRT2	0.493716	0.00101643	0.00414361	3.28594
snRNA_BB	ALOX12-AS1	0.567342	0.00102393	0.00417081	3.28387
snRNA_BB	NUBPL	0.250046	0.001034	0.00420837	3.28111
snRNA_BB	ALG13	0.237259	0.00104466	0.00424832	3.27821
snRNA_BB	DNAJC2	0.475152	0.00104536	0.00424942	3.27803
snRNA_BB	ABCB10	0.498639	0.00105982	0.00430645	3.27415
snRNA_BB	TAPT1-AS1	0.168467	0.0010619	0.00431317	3.27359
snRNA_BB	ESCO1	0.249184	0.00106672	0.00433099	3.27231
snRNA_BB	COG6	0.330919	0.00106717	0.00433106	3.27219
snRNA_BB	DIMT1	0.57998	0.00106769	0.00433138	3.27206
snRNA_BB	ARL13B	0.33548	0.00106893	0.00433468	3.27173
snRNA_BB	CCDC110	1.53015	0.0010804	0.00437941	3.26871
snRNA_BB	MCUB	0.139211	0.00108229	0.00438529	3.26821
snRNA_BB	RHBDL2	0.724351	0.00110599	0.00447586	3.26208
snRNA_BB	PKN1	0.489833	0.00111268	0.00450113	3.26037
snRNA_BB	PISD	0.349122	0.0011264	0.0045548	3.25689
snRNA_BB	ARL5A	0.367286	0.00112852	0.00456095	3.25636
snRNA_BB	C11orf80	0.218204	0.00113396	0.00457979	3.25499
snRNA_BB	KHDRBS1	0.244567	0.00115295	0.0046546	3.25027
snRNA_BB	ZFP82	0.524913	0.001159	0.00467715	3.24878
snRNA_BB	CA1	1.41458	0.00116338	0.00469295	3.24771
snRNA_BB	MPP5	0.464434	0.00116457	0.00469586	3.24742
snRNA_BB	TMX4	0.39134	0.00116615	0.0046985	3.24703
snRNA_BB	DUT	0.439339	0.00116955	0.00471023	3.2462
snRNA_BB	HMCES	0.514741	0.0011763	0.00473359	3.24457
snRNA_BB	STAT5B	0.271515	0.00117989	0.00474614	3.2437
snRNA_BB	ADGRB1	0.595251	0.00118356	0.00475897	3.24281
snRNA_BB	SLC25A37	0.356222	0.00119124	0.00478702	3.24097
snRNA_BB	SGSM2	0.334966	0.00119149	0.00478702	3.24091
snRNA_BB	LINC00240	0.480459	0.00119594	0.00480295	3.23985
snRNA_BB	CAPN1	0.903321	0.00120368	0.00483211	3.23801
snRNA_BB	EPC2	0.309923	0.0012129	0.00486716	3.23583
snRNA_BB	CCDC6	0.401941	0.00122012	0.00489364	3.23414
snRNA_BB	NIPSNAP1	0.60686	0.00122047	0.00489364	3.23405
snRNA_BB	G3BP2	0.302293	0.00122346	0.00490366	3.23335
snRNA_BB	ZNF362	0.488891	0.00123823	0.00495689	3.22992
snRNA_BB	TBC1D2B	0.551798	0.00124092	0.00496566	3.2293
snRNA_BB	AL445928.2	0.687184	0.00124956	0.00499825	3.22732
snRNA_BB	VSTM2L	1.67114	0.00125928	0.00503512	3.2251
snRNA_BB	AC008014.1	0.789129	0.00126663	0.00506247	3.22343
snRNA_BB	SLC7A6	0.530408	0.00128847	0.00514358	3.21854
snRNA_BB	SVOP	0.297918	0.00128969	0.0051464	3.21826
snRNA_BB	AC103876.1	0.508595	0.00130868	0.00521801	3.21407
snRNA_BB	CACUL1	0.294209	0.0013096	0.00521961	3.21387
snRNA_BB	DNAJC18	0.498063	0.0013107	0.00522193	3.21363
snRNA_BB	AC087280.2	2.72154	0.00131233	0.00522632	3.21327
snRNA_BB	RPTOR	0.265586	0.00133507	0.00531386	3.20833
snRNA_BB	NT5M	1.58331	0.00133537	0.00531386	3.20827
snRNA_BB	PNMA2	1.44128	0.00134357	0.00534222	3.20651
snRNA_BB	AGBL5	0.538096	0.00136124	0.00540818	3.20275
snRNA_BB	CAPS2	0.962585	0.00136241	0.00541067	3.2025
snRNA_BB	LINC00882	0.203121	0.00136944	0.00543428	3.20102
snRNA_BB	ANAPC1	0.379767	0.00137963	0.00547255	3.19888
snRNA_BB	SLC35A1	0.467518	0.00138469	0.00549045	3.19782
snRNA_BB	AC069133.1	0.996513	0.00139681	0.00553411	3.19531
snRNA_BB	IK	0.418911	0.00139742	0.00553433	3.19518
snRNA_BB	TRPC7	0.207415	0.00140748	0.00557196	3.19311
snRNA_BB	ZHX3	0.344485	0.00142	0.00561932	3.19055
snRNA_BB	SORBS1	0.303125	0.00144379	0.00570895	3.18575
snRNA_BB	ZBED4	0.386535	0.00145404	0.00574718	3.1837
snRNA_BB	ERICH3-AS1	1.73697	0.00146552	0.00579028	3.18143
snRNA_BB	SNAPC3	0.303907	0.00147447	0.00582105	3.17966
snRNA_BB	BTF3L4	0.392412	0.00147524	0.00582176	3.17951
snRNA_BB	LINGO1	0.58502	0.00148733	0.00586718	3.17714
snRNA_BB	LHFPL5	1.0069	0.00149064	0.00587792	3.1765
snRNA_BB	ZNF106	0.36647	0.00149821	0.00590313	3.17503
snRNA_BB	ACSM6	0.272848	0.00152728	0.0060129	3.16945
snRNA_BB	NEK4	0.42727	0.00152801	0.00601341	3.16931
snRNA_BB	SOGA1	0.401128	0.00153638	0.006044	3.16772
snRNA_BB	NUP88	0.332999	0.00154243	0.00606538	3.16658
snRNA_BB	PHACTR4	0.260576	0.0015632	0.00614466	3.16269
snRNA_BB	TM9SF2	0.289923	0.00156504	0.00614704	3.16235
snRNA_BB	TRIT1	0.555961	0.00157547	0.0061856	3.16041
snRNA_BB	ZNF197	0.366889	0.00158817	0.00622857	3.15807
snRNA_BB	CCDC138	0.217409	0.00159709	0.00626063	3.15644
snRNA_BB	ZNF423	0.51635	0.00160156	0.0062757	3.15562
snRNA_BB	FARP2	0.320217	0.00161468	0.00632463	3.15324
snRNA_BB	CABP1	0.0495613	0.00161541	0.00632504	3.15311
snRNA_BB	SRGAP2-AS1	1.00036	0.00161657	0.00632709	3.1529
snRNA_BB	LRRC58	0.579844	0.00161734	0.00632761	3.15276
snRNA_BB	SPDYE5	0.437153	0.00164236	0.00642047	3.14828
snRNA_BB	OPHN1	0.407801	0.00164301	0.0064205	3.14816
snRNA_BB	DHX40	0.806031	0.0016467	0.00642991	3.14751
snRNA_BB	GSPT1	0.269727	0.00165016	0.00644092	3.14689
snRNA_BB	KLC4	0.49947	0.00166979	0.00651243	3.14343
snRNA_BB	DGKZ	0.836544	0.00168408	0.00656305	3.14094
snRNA_BB	POGLUT1	0.641375	0.00171249	0.00666857	3.13604
snRNA_BB	PCCB	0.419596	0.00173371	0.0067486	3.13242
snRNA_BB	ZNF573	0.420719	0.00173644	0.00675397	3.13196
snRNA_BB	ARHGEF40	1.15249	0.00173851	0.00675938	3.13161
snRNA_BB	SENP5	0.225048	0.0017434	0.00677575	3.13078
snRNA_BB	ZNF766	0.830212	0.00175274	0.0068094	3.12921
snRNA_BB	NAV2	2.08845	0.00176285	0.00684603	3.12752
snRNA_BB	APC2	0.552937	0.00176546	0.00685348	3.12709
snRNA_BB	MT-ND1	0.191057	0.00177479	0.00688466	3.12554
snRNA_BB	LASP1	0.312059	0.00177487	0.00688466	3.12553
snRNA_BB	UIMC1	0.221141	0.00178711	0.00692945	3.12351
snRNA_BB	ABCA8	1.00557	0.00178893	0.00693383	3.12321
snRNA_BB	SLC9B1	0.665572	0.00181342	0.00702605	3.1192
snRNA_BB	PARG	0.246518	0.00182841	0.00707863	3.11678
snRNA_BB	AC097376.3	0.231407	0.00185386	0.00717159	3.1127
snRNA_BB	TMEM184C	0.527107	0.00185542	0.00717488	3.11245
snRNA_BB	SENP2	0.230943	0.00185865	0.00718458	3.11194
snRNA_BB	ACTN4	0.418272	0.00186805	0.00721385	3.11045
snRNA_BB	ABCC1	0.500397	0.00189502	0.00730822	3.10621
snRNA_BB	TRAF3IP2	0.371987	0.00189973	0.00732355	3.10548
snRNA_BB	POLI	0.533906	0.00190632	0.00734611	3.10445
snRNA_BB	GCSH	0.604078	0.00193404	0.00745007	3.10018
snRNA_BB	ZNF559	0.281089	0.00195131	0.00751058	3.09754
snRNA_BB	RABL2A	0.718755	0.001952	0.00751058	3.09744
snRNA_BB	AC104123.1	2.27468	0.00195394	0.00751517	3.09714
snRNA_BB	SYT16	3.54507	0.0019822	0.00761797	3.09289
snRNA_BB	CDYL	0.433578	0.00200126	0.00768828	3.09005
snRNA_BB	ZNF790-AS1	0.400072	0.00201044	0.00772057	3.08869
snRNA_BB	UBE3D	0.245603	0.0020255	0.00777544	3.08647
snRNA_BB	RMND1	0.353062	0.0020388	0.00782049	3.08452
snRNA_BB	LMLN	0.711394	0.00204519	0.007842	3.08359
snRNA_BB	SRBD1	0.397259	0.00205025	0.00785544	3.08285
snRNA_BB	GDPD1	0.864747	0.0020509	0.00785544	3.08276
snRNA_BB	ALG9	0.485189	0.00205105	0.00785544	3.08274
snRNA_BB	TTC21A	1.09263	0.00206586	0.00790608	3.0806
snRNA_BB	RBM27	0.269502	0.00210121	0.0080383	3.07554
snRNA_BB	STARD3NL	0.601193	0.00215006	0.00821888	3.06868
snRNA_BB	AGPS	0.334178	0.0021543	0.00823196	3.06809
snRNA_BB	THOC1	0.284709	0.00216018	0.00825124	3.06728
snRNA_BB	NFATC2IP	0.366592	0.00216114	0.00825178	3.06714
snRNA_BB	TSC2	0.220969	0.00216357	0.00825789	3.06681
snRNA_BB	DEPDC5	0.410825	0.00216748	0.00826965	3.06627
snRNA_BB	PIK3IP1	0.457327	0.00217976	0.00831336	3.06458
snRNA_BB	PPP3CC	0.158317	0.00218252	0.00832071	3.0642
snRNA_BB	CDC7	0.572518	0.00219244	0.00835534	3.06284
snRNA_BB	ZNF44	0.273332	0.00221534	0.00843941	3.05973
snRNA_BB	AC242426.2	0.55143	0.00223148	0.00849119	3.05756
snRNA_BB	CCP110	0.576868	0.0022445	0.00853421	3.05581
snRNA_BB	AC016705.2	1.0385	0.00224539	0.00853436	3.0557
snRNA_BB	SLC7A8	0.834732	0.00224948	0.00854665	3.05515
snRNA_BB	MCM3AP-AS1	0.630028	0.00225228	0.00855079	3.05478
snRNA_BB	PAXBP1-AS1	0.414452	0.00227888	0.00864194	3.05125
snRNA_BB	STARD4	0.706018	0.00228292	0.00865166	3.05072
snRNA_BB	ZNF717	0.399773	0.00228793	0.00866313	3.05006
snRNA_BB	MSI1	0.618366	0.00230671	0.00873092	3.04761
snRNA_BB	MGST3	0.239843	0.00231201	0.00874767	3.04692
snRNA_BB	GTPBP10	0.434448	0.00232317	0.00877661	3.04547
snRNA_BB	AC106897.1	0.624454	0.00233514	0.00881851	3.04392
snRNA_BB	TP53BP2	0.697002	0.00235209	0.00887916	3.04175
snRNA_BB	AC011933.4	0.625037	0.00235407	0.0088833	3.04149
snRNA_BB	WDR35	0.459807	0.00235598	0.00888715	3.04125
snRNA_BB	UBE2Q2	0.262651	0.00236698	0.00892188	3.03985
snRNA_BB	RAP1A	0.301198	0.00237444	0.00894666	3.0389
snRNA_BB	RAP2C-AS1	0.546361	0.00238146	0.00896971	3.03801
snRNA_BB	TRA2B	0.250082	0.00240166	0.00903898	3.03546
snRNA_BB	LYPD5	0.841241	0.00243948	0.00917099	3.03075
snRNA_BB	SHANK1	0.348482	0.00244702	0.00919588	3.02982
snRNA_BB	ITGB3BP	0.283094	0.00245708	0.00923019	3.02858
snRNA_BB	MCM9	0.39951	0.00246793	0.00926053	3.02725
snRNA_BB	ATP1B1	0.303074	0.00248145	0.00930776	3.02559
snRNA_BB	SLC2A11	0.35908	0.00249244	0.00934547	3.02426
snRNA_BB	EIF4ENIF1	0.298985	0.00249889	0.00936617	3.02348
snRNA_BB	SLC9A6	0.586846	0.00250551	0.00938743	3.02268
snRNA_BB	CTPS2	0.356244	0.00253774	0.00950465	3.0188
snRNA_BB	YWHAB	0.243251	0.00253995	0.00950936	3.01854
snRNA_BB	SPECC1L	0.215896	0.00255155	0.00953849	3.01716
snRNA_BB	AC022325.2	5.60987	0.00258466	0.00965865	3.01325
snRNA_BB	UXS1	0.471067	0.00259643	0.00969751	3.01187
snRNA_BB	SPEF2	0.359103	0.00262694	0.00980567	3.00832
snRNA_BB	BEND6	0.1532	0.00263189	0.00981682	3.00775
snRNA_BB	MARS	0.429438	0.00263385	0.00981682	3.00752
snRNA_BB	BCAT2	0.701264	0.00263814	0.00982619	3.00703
snRNA_BB	TECR	0.280101	0.00263833	0.00982619	3.00701
snRNA_BB	DENND4B	0.503388	0.00265525	0.00988097	3.00506
snRNA_BB	AC023424.3	0.426287	0.00265601	0.00988097	3.00498
snRNA_BB	SLC25A46	0.391799	0.00267533	0.00994916	3.00277
snRNA_BB	UNK	0.261846	0.00270366	0.0100508	2.99956
snRNA_BB	PDE3B	2.67763	0.00270805	0.0100634	2.99907
snRNA_BB	NUP50-DT	0.396631	0.00272167	0.0101102	2.99754
snRNA_BB	AC092835.1	0.809421	0.00272477	0.010118	2.99719
snRNA_BB	DCP1B	0.530174	0.00279053	0.0103506	2.98992
snRNA_BB	SHOC2	0.348647	0.00280269	0.0103919	2.98859
snRNA_BB	ZBTB1	0.664021	0.00280514	0.0103971	2.98832
snRNA_BB	WDR43	0.360224	0.00281523	0.0104268	2.98722
snRNA_BB	CCND2	1.48389	0.00281857	0.0104353	2.98686
snRNA_BB	AC092745.5	0.733839	0.00283042	0.0104753	2.98558
snRNA_BB	USP24	0.193145	0.0028488	0.0105355	2.9836
snRNA_BB	UTP18	0.38464	0.00285501	0.0105546	2.98293
snRNA_BB	SLC12A6	0.406227	0.00286223	0.0105773	2.98216
snRNA_BB	SLK	0.34869	0.0028646	0.0105822	2.98191
snRNA_BB	MRI1	0.670414	0.00286816	0.0105914	2.98153
snRNA_BB	LPIN1	0.288249	0.00291726	0.0107608	2.97632
snRNA_BB	FRG1-DT	0.608507	0.00293707	0.0108299	2.97425
snRNA_BB	NEK9	0.323594	0.00299212	0.0110248	2.96855
snRNA_BB	MSH5	1.06846	0.00299751	0.0110405	2.96799
snRNA_BB	FAM189A1	1.83121	0.00300459	0.0110625	2.96727
snRNA_BB	ARHGEF33	1.03599	0.00301016	0.011079	2.9667
snRNA_BB	GTF2H1	0.489968	0.00302144	0.0111123	2.96555
snRNA_BB	CD81	0.351674	0.00303578	0.011161	2.96409
snRNA_BB	RBL1	0.39663	0.00305892	0.0112378	2.96175
snRNA_BB	MT-CO2	0.150685	0.00308122	0.0113114	2.95952
snRNA_BB	EIF4E3	0.869888	0.00308271	0.0113127	2.95937
snRNA_BB	AC025043.1	0.363767	0.00308385	0.0113127	2.95925
snRNA_BB	AC073167.1	0.271704	0.00308671	0.011316	2.95897
snRNA_BB	ZNF577	0.501613	0.00309935	0.0113571	2.95771
snRNA_BB	ZNF790	0.298789	0.00312335	0.0114408	2.95533
snRNA_BB	MARK4	0.305936	0.00312515	0.0114433	2.95515
snRNA_BB	AC021127.1	0.477477	0.00313146	0.0114622	2.95453
snRNA_BB	HLA-A	0.550668	0.00314773	0.0115175	2.95293
snRNA_BB	TRPV1	0.555879	0.00315539	0.0115406	2.95218
snRNA_BB	AC006355.2	0.631579	0.00315636	0.0115406	2.95208
snRNA_BB	MT-CO3	0.157449	0.00316903	0.0115827	2.95085
snRNA_BB	SNX32	1.14808	0.00318405	0.0116333	2.94939
snRNA_BB	INTS4	0.335747	0.00322656	0.0117801	2.94529
snRNA_BB	LCORL	0.267692	0.00323046	0.01179	2.94491
snRNA_BB	LYRM2	0.671037	0.0032345	0.0118004	2.94453
snRNA_BB	PLIN2	1.85446	0.00324453	0.0118327	2.94357
snRNA_BB	TCHP	0.280004	0.00327614	0.0119436	2.94056
snRNA_BB	SLC1A1	1.22285	0.00331045	0.0120599	2.93734
snRNA_BB	HMGXB4	0.276952	0.00335336	0.0122118	2.93334
snRNA_BB	NOVA2	0.244302	0.003383	0.0123153	2.93061
snRNA_BB	AL390242.1	1.21335	0.00339375	0.0123499	2.92962
snRNA_BB	SNHG5	0.311098	0.00342738	0.0124677	2.92656
snRNA_BB	MRAS	1.38066	0.00343379	0.0124865	2.92597
snRNA_BB	HAVCR2	0.811168	0.00345373	0.0125544	2.92417
snRNA_BB	IFT43	0.320858	0.00348628	0.0126682	2.92125
snRNA_BB	AC034195.1	0.529341	0.00351683	0.0127745	2.91853
snRNA_BB	LRRN3	0.44027	0.00356733	0.0129533	2.91408
snRNA_BB	ICE2	0.382696	0.00357266	0.0129641	2.91362
snRNA_BB	RIN3	0.56025	0.00357292	0.0129641	2.9136
snRNA_BB	CEBPZ	0.341372	0.00357951	0.0129833	2.91302
snRNA_BB	CYB5R4	0.378127	0.0035826	0.0129898	2.91275
snRNA_BB	COL6A1	1.07521	0.00358402	0.0129903	2.91263
snRNA_BB	AC023509.6	0.317967	0.0035957	0.0130232	2.91161
snRNA_BB	FOXK1	0.350486	0.00360286	0.0130444	2.91099
snRNA_BB	WDR76	1.17181	0.0036062	0.0130518	2.9107
snRNA_BB	UACA	0.723458	0.00361617	0.0130831	2.90984
snRNA_BB	LPCAT3	0.515034	0.00361786	0.0130843	2.90969
snRNA_BB	PHF20L1	0.246797	0.00361928	0.0130843	2.90957
snRNA_BB	LONRF3	0.906623	0.00362369	0.0130914	2.90919
snRNA_BB	CUL4A	0.292223	0.00365865	0.0132034	2.90619
snRNA_BB	EPHA7	0.0793667	0.00366275	0.0132134	2.90583
snRNA_BB	AC016642.1	0.763595	0.00368287	0.0132716	2.90412
snRNA_BB	AC010260.1	1.81296	0.00368526	0.0132754	2.90392
snRNA_BB	ZNF846	0.845459	0.00369468	0.0132998	2.90312
snRNA_BB	METTL4	0.777388	0.00372137	0.013391	2.90086
snRNA_BB	PC	0.717002	0.00374047	0.0134549	2.89926
snRNA_BB	PAK2	0.283478	0.00375068	0.0134868	2.8984
snRNA_BB	RARS	0.385934	0.00382211	0.0137244	2.89248
snRNA_BB	ZNF793	0.462879	0.00382225	0.0137244	2.89247
snRNA_BB	NF2	0.457771	0.00382597	0.0137328	2.89217
snRNA_BB	TRIM24	0.352729	0.00383623	0.0137647	2.89132
snRNA_BB	BZW2	0.250984	0.00388975	0.0139518	2.88697
snRNA_BB	NDUFV3	0.272294	0.00391268	0.014029	2.88512
snRNA_BB	ATAD2	0.991047	0.00393644	0.0141091	2.88321
snRNA_BB	PIR	0.524582	0.0039428	0.0141235	2.8827
snRNA_BB	ODF2	0.448305	0.00394329	0.0141235	2.88266
snRNA_BB	ALK	0.64527	0.00396691	0.014203	2.88078
snRNA_BB	CNRIP1	0.269482	0.00397355	0.0142166	2.88025
snRNA_BB	SNAI3-AS1	1.31541	0.00401168	0.0143479	2.87724
snRNA_BB	AC004253.1	0.527108	0.00401536	0.0143508	2.87695
snRNA_BB	OGFOD1	0.569551	0.00403411	0.0144075	2.87548
snRNA_BB	TMEM87B	0.441547	0.00403827	0.0144173	2.87516
snRNA_BB	ARMC10	0.332586	0.00404554	0.0144381	2.87459
snRNA_BB	CCDC146	0.259512	0.00406283	0.0144894	2.87324
snRNA_BB	CXXC4-AS1	0.83462	0.00414867	0.0147721	2.86663
snRNA_BB	DCBLD2	0.495034	0.00418569	0.0148904	2.86382
snRNA_BB	XRCC1	0.474666	0.00419275	0.0149102	2.86328
snRNA_BB	C3orf14	0.442947	0.00419889	0.0149267	2.86282
snRNA_BB	TMEM45A	0.70516	0.00420227	0.0149334	2.86257
snRNA_BB	CCDC90B	0.426486	0.00422643	0.0150086	2.86075
snRNA_BB	ATPAF1	0.295314	0.0042496	0.0150802	2.85901
snRNA_BB	LCMT1	0.32955	0.00425984	0.0151044	2.85825
snRNA_BB	SCOC-AS1	1.13802	0.00426096	0.0151044	2.85817
snRNA_BB	RSPRY1	0.379583	0.00428237	0.0151749	2.85658
snRNA_BB	AC093849.4	0.842613	0.00432	0.0153029	2.8538
snRNA_BB	HEATR3	0.450736	0.00436225	0.0154416	2.8507
snRNA_BB	TNIP1	0.497481	0.0043907	0.0155368	2.84864
snRNA_BB	CBR4	0.217005	0.00439628	0.0155497	2.84823
snRNA_BB	AC019205.1	0.266454	0.00439745	0.0155497	2.84815
snRNA_BB	TEX10	0.559312	0.00440007	0.0155535	2.84796
snRNA_BB	NUP205	0.441519	0.00443944	0.0156871	2.84512
snRNA_BB	SARS	0.281564	0.00450385	0.0158866	2.84053
snRNA_BB	DBT	0.46895	0.00453702	0.0159923	2.83819
snRNA_BB	RMDN1	0.34399	0.00453938	0.015995	2.83802
snRNA_BB	AC021683.2	1.41467	0.00454662	0.0160149	2.83751
snRNA_BB	ABHD15-AS1	0.569457	0.0045726	0.0160931	2.8357
snRNA_BB	STAT1	0.837797	0.00457366	0.0160931	2.83562
snRNA_BB	PAAF1	0.270153	0.00459468	0.0161614	2.83416
snRNA_BB	TAC4	0.751602	0.0046131	0.0162205	2.83288
snRNA_BB	RBM23	0.30008	0.00462027	0.01624	2.83238
snRNA_BB	TCTN3	0.504881	0.00464557	0.0163232	2.83064
snRNA_BB	AC092100.1	1.38709	0.00466199	0.0163751	2.82951
snRNA_BB	IST1	0.274427	0.00467038	0.0163988	2.82893
snRNA_BB	TTC7B	0.21624	0.00470741	0.0165172	2.8264
snRNA_BB	RO60	0.319787	0.00471548	0.0165397	2.82585
snRNA_BB	SARM1	0.269286	0.00472258	0.0165588	2.82537
snRNA_BB	ANAPC10	0.250211	0.00473031	0.0165791	2.82485
snRNA_BB	SLC35G2	0.601074	0.00473168	0.0165791	2.82476
snRNA_BB	ZNF430	0.417211	0.00475038	0.0166356	2.82349
snRNA_BB	CHEK2	2.76564	0.00475114	0.0166356	2.82344
snRNA_BB	BEND7	0.36377	0.00476067	0.0166632	2.8228
snRNA_BB	LONP1	0.491402	0.00476741	0.0166809	2.82234
snRNA_BB	ECD	0.409439	0.00484249	0.0169377	2.81733
snRNA_BB	SHANK2-AS1	1.04683	0.00485278	0.0169678	2.81665
snRNA_BB	LINC00051	1.19545	0.00486243	0.0169956	2.81601
snRNA_BB	EIF1AX	0.288628	0.00490381	0.0171197	2.81329
snRNA_BB	NEDD4L	1.79835	0.0049048	0.0171197	2.81322
snRNA_BB	PPP2R3C	0.357279	0.00492995	0.0172015	2.81158
snRNA_BB	VMP1	0.24743	0.00494609	0.0172518	2.81052
snRNA_BB	TTC27	0.48067	0.00494791	0.0172521	2.81041
snRNA_BB	NCBP3	0.288024	0.00500375	0.0174347	2.80679
snRNA_BB	DPF1	0.810636	0.00504413	0.0175631	2.8042
snRNA_BB	RAD51C	0.489941	0.00512256	0.01783	2.79922
snRNA_BB	PIGL	0.268447	0.00516149	0.0179592	2.79678
snRNA_BB	STAG3	0.526544	0.00520717	0.0180993	2.79393
snRNA_BB	AGK	0.313429	0.00521655	0.0181256	2.79335
snRNA_BB	FANCA	0.856654	0.00523282	0.0181722	2.79234
snRNA_BB	FAM149B1	0.325872	0.00523359	0.0181722	2.79229
snRNA_BB	AS3MT	1.22465	0.00529052	0.0183635	2.78879
snRNA_BB	AC021752.1	0.467389	0.00529825	0.0183839	2.78832
snRNA_BB	NAA50	0.370863	0.00531402	0.0184259	2.78736
snRNA_BB	ZC3H18	0.423565	0.00532276	0.0184397	2.78682
snRNA_BB	ADAM12	1.66572	0.00532354	0.0184397	2.78678
snRNA_BB	NEK11	0.752428	0.00540504	0.018709	2.78185
snRNA_BB	KPNB1	0.211313	0.00542838	0.0187768	2.78045
snRNA_BB	HSD17B14	1.13889	0.00545551	0.0188576	2.77883
snRNA_BB	FEZ1	0.443542	0.00546471	0.0188829	2.77828
snRNA_BB	TRAP1	0.287927	0.00548887	0.0189533	2.77685
snRNA_BB	LRSAM1	0.416216	0.00550531	0.0189989	2.77588
snRNA_BB	RRBP1	0.701731	0.005543	0.0191204	2.77366
snRNA_BB	TGFB1	0.475236	0.00555809	0.0191658	2.77277
snRNA_BB	EBF4	0.642874	0.00558018	0.0192354	2.77148
snRNA_BB	SGK2	0.875994	0.00562678	0.0193893	2.76877
snRNA_BB	LSS	0.35848	0.00564744	0.0194538	2.76758
snRNA_BB	SEMA6D	1.83181	0.00565444	0.0194671	2.76717
snRNA_BB	SPDYA	0.824923	0.00565519	0.0194671	2.76713
snRNA_BB	PARVB	0.600804	0.00570115	0.019605	2.76449
snRNA_BB	AL031280.1	0.815307	0.00570767	0.0196207	2.76412
snRNA_BB	GALNT1	0.221388	0.00573853	0.01972	2.76236
snRNA_BB	CNPY2	0.236819	0.00574621	0.0197396	2.76192
snRNA_BB	HDAC2	0.417637	0.00576264	0.0197893	2.76099
snRNA_BB	GTF2IRD2	0.490974	0.00580229	0.0199186	2.75875
snRNA_BB	HMX1	0.270399	0.0058156	0.0199575	2.758
snRNA_BB	ADCYAP1R1	2.47647	0.00582003	0.0199658	2.75775
snRNA_BB	USP40	0.254228	0.00582283	0.0199685	2.7576
snRNA_BB	MXD4	0.312289	0.00584794	0.0200478	2.75619
snRNA_BB	GCLC	0.410439	0.00586238	0.0200904	2.75538
snRNA_BB	SLC36A4	0.233839	0.00587478	0.020126	2.75469
snRNA_BB	SLAIN2	0.30315	0.00590058	0.0202006	2.75326
snRNA_BB	LRRC8B	0.179645	0.005974	0.0204449	2.7492
snRNA_BB	LINC01122	1.36501	0.00598445	0.0204737	2.74863
snRNA_BB	ZBTB44	0.316799	0.00599373	0.0204984	2.74812
snRNA_BB	FUT10	0.770627	0.00600502	0.02053	2.74751
snRNA_BB	HS2ST1	0.187215	0.00603989	0.0206422	2.74561
snRNA_BB	ENKUR	1.37803	0.00607048	0.0207325	2.74395
snRNA_BB	ZCWPW2	0.422784	0.00614923	0.02098	2.73972
snRNA_BB	C8orf76	0.658655	0.00617372	0.0210564	2.73841
snRNA_BB	CHMP4A	0.594258	0.00618717	0.021095	2.73769
snRNA_BB	LACTBL1	0.419291	0.00624542	0.0212791	2.73461
snRNA_BB	AC007285.1	0.69664	0.00625044	0.021289	2.73435
snRNA_BB	LMO7	0.57105	0.0062601	0.0213146	2.73384
snRNA_BB	UBE4B	0.174745	0.00626678	0.0213228	2.73349
snRNA_BB	PCNT	0.663687	0.00631313	0.0214659	2.73106
snRNA_BB	AC069437.1	0.323514	0.00640654	0.0217761	2.72621
snRNA_BB	ACLY	0.709509	0.00645293	0.0219115	2.72383
snRNA_BB	NMNAT3	0.249449	0.00646422	0.0219424	2.72325
snRNA_BB	EIF2AK4	0.293569	0.00647076	0.0219571	2.72292
snRNA_BB	AL132780.1	1.32717	0.00652383	0.0221222	2.72022
snRNA_BB	PRMT7	0.378969	0.00653449	0.0221508	2.71968
snRNA_BB	COQ8A	0.732242	0.00656434	0.0222369	2.71817
snRNA_BB	LIX1L	0.480478	0.00671465	0.0227307	2.71067
snRNA_BB	ZNF827	0.290194	0.00674068	0.022811	2.70939
snRNA_BB	NCOA7	0.251566	0.00674292	0.022811	2.70928
snRNA_BB	VSIG10	0.58086	0.0068025	0.022997	2.70636
snRNA_BB	WWC2	1.30245	0.0068133	0.0230257	2.70583
snRNA_BB	CCNT1	0.462272	0.00682406	0.0230542	2.70531
snRNA_BB	DDI2	0.468321	0.00686736	0.0231849	2.70321
snRNA_BB	SNX4	0.279668	0.00688716	0.0232439	2.70225
snRNA_BB	SUCLG2	0.491131	0.00693049	0.0233822	2.70017
snRNA_BB	TBX5	0.927691	0.00700003	0.0236009	2.69684
snRNA_BB	IL6ST	0.217168	0.00701066	0.0236288	2.69634
snRNA_BB	ZNF30	0.408372	0.00704247	0.02372	2.69483
snRNA_BB	GPRIN1	0.689739	0.00718473	0.0241747	2.68816
snRNA_BB	KDM1B	0.652772	0.00719886	0.0242141	2.6875
snRNA_BB	CAAP1	0.441998	0.0072046	0.0242253	2.68724
snRNA_BB	TTC38	1.33255	0.00725305	0.0243718	2.685
snRNA_BB	TRAPPC8	0.184081	0.00734762	0.024673	2.68066
snRNA_BB	CFC1	0.95679	0.00737168	0.0247386	2.67957
snRNA_BB	AC091946.1	0.54005	0.0073721	0.0247386	2.67955
snRNA_BB	AP3M2	0.471195	0.00743241	0.0249326	2.67682
snRNA_BB	SLC35A5	0.442274	0.00743747	0.0249329	2.67659
snRNA_BB	AGBL1	0.483965	0.00744875	0.0249623	2.67609
snRNA_BB	BCCIP	0.304928	0.00746756	0.0250169	2.67524
snRNA_BB	AL359706.1	0.430015	0.00750124	0.0251047	2.67373
snRNA_BB	FKBP5	2.24384	0.00753668	0.0252147	2.67215
snRNA_BB	CKLF	0.528023	0.00760041	0.0254109	2.66932
snRNA_BB	SV2C	1.68046	0.00762995	0.0255012	2.66802
[truncated: 5,243 more rows]

## Sheet: cast_table
names	scRNA_BB	scRNA_GB	snRNA_BB	snRNA_GB
A2M	FALSE	FALSE	FALSE	TRUE
A2ML1-AS1	FALSE	TRUE	TRUE	TRUE
AACS	FALSE	FALSE	TRUE	FALSE
AAMDC	FALSE	TRUE	TRUE	TRUE
AARS	FALSE	TRUE	TRUE	TRUE
AASDH	FALSE	TRUE	TRUE	FALSE
AATK	FALSE	TRUE	TRUE	TRUE
ABAT	TRUE	TRUE	TRUE	TRUE
ABCA8	TRUE	FALSE	TRUE	TRUE
ABCB10	FALSE	FALSE	TRUE	FALSE
ABCB7	FALSE	FALSE	TRUE	FALSE
ABCC1	FALSE	FALSE	TRUE	TRUE
ABCC8	FALSE	FALSE	TRUE	FALSE
ABCD2	FALSE	TRUE	FALSE	FALSE
ABCD3	FALSE	TRUE	FALSE	TRUE
ABCF3	FALSE	TRUE	FALSE	FALSE
ABCG1	FALSE	TRUE	FALSE	FALSE
ABHD12	FALSE	TRUE	FALSE	FALSE
ABHD15-AS1	FALSE	FALSE	TRUE	FALSE
ABHD17C	FALSE	TRUE	TRUE	TRUE
ABHD18	FALSE	TRUE	TRUE	TRUE
ABHD2	FALSE	TRUE	FALSE	TRUE
ABHD8	FALSE	TRUE	FALSE	FALSE
ABI3BP	FALSE	FALSE	TRUE	TRUE
ABLIM1	FALSE	FALSE	TRUE	FALSE
ABLIM2	FALSE	TRUE	FALSE	TRUE
ABTB2	FALSE	FALSE	FALSE	TRUE
AC002070.1	FALSE	FALSE	FALSE	TRUE
AC004039.1	FALSE	FALSE	TRUE	TRUE
AC004053.1	FALSE	FALSE	FALSE	TRUE
AC004158.1	FALSE	FALSE	FALSE	TRUE
AC004253.1	FALSE	FALSE	TRUE	FALSE
AC004540.1	TRUE	TRUE	TRUE	TRUE
AC005037.1	FALSE	TRUE	TRUE	TRUE
AC005064.1	FALSE	TRUE	FALSE	TRUE
AC005480.1	FALSE	TRUE	TRUE	TRUE
AC005520.2	FALSE	FALSE	FALSE	TRUE
AC005670.3	FALSE	FALSE	TRUE	FALSE
AC005695.2	FALSE	FALSE	FALSE	TRUE
AC005740.5	FALSE	FALSE	TRUE	FALSE
AC005906.2	FALSE	TRUE	FALSE	TRUE
AC005908.3	FALSE	FALSE	TRUE	TRUE
AC006001.2	FALSE	TRUE	FALSE	TRUE
AC006059.1	FALSE	FALSE	TRUE	FALSE
AC006115.2	FALSE	TRUE	TRUE	TRUE
AC006148.1	FALSE	FALSE	TRUE	FALSE
AC006355.2	FALSE	FALSE	TRUE	TRUE
AC006387.1	FALSE	TRUE	FALSE	TRUE
AC006460.1	FALSE	TRUE	TRUE	TRUE
AC006460.2	FALSE	TRUE	FALSE	TRUE
AC006511.6	FALSE	FALSE	TRUE	TRUE
AC007038.1	FALSE	TRUE	FALSE	TRUE
AC007098.1	FALSE	TRUE	TRUE	TRUE
AC007114.2	FALSE	TRUE	FALSE	TRUE
AC007216.4	FALSE	TRUE	TRUE	FALSE
AC007262.2	FALSE	FALSE	FALSE	TRUE
AC007285.1	FALSE	FALSE	TRUE	TRUE
AC007349.2	FALSE	FALSE	FALSE	TRUE
AC007376.2	FALSE	FALSE	FALSE	TRUE
AC007563.2	FALSE	TRUE	FALSE	TRUE
AC007566.1	FALSE	FALSE	TRUE	TRUE
AC007608.3	FALSE	FALSE	TRUE	TRUE
AC007749.2	FALSE	FALSE	FALSE	TRUE
AC008014.1	FALSE	FALSE	TRUE	FALSE
AC008050.1	FALSE	FALSE	FALSE	TRUE
AC008115.2	FALSE	TRUE	TRUE	TRUE
AC008269.1	FALSE	TRUE	FALSE	TRUE
AC008543.1	FALSE	FALSE	TRUE	TRUE
AC008667.1	FALSE	FALSE	FALSE	TRUE
AC008731.1	FALSE	FALSE	TRUE	FALSE
AC008771.1	FALSE	FALSE	TRUE	FALSE
AC009053.3	FALSE	FALSE	FALSE	TRUE
AC009093.2	FALSE	FALSE	FALSE	TRUE
AC009120.2	FALSE	TRUE	FALSE	FALSE
AC009126.1	FALSE	FALSE	TRUE	TRUE
AC009227.1	FALSE	FALSE	FALSE	TRUE
AC009264.1	FALSE	FALSE	TRUE	FALSE
AC009318.1	FALSE	FALSE	FALSE	TRUE
AC009501.3	FALSE	FALSE	FALSE	TRUE
AC009522.1	FALSE	TRUE	FALSE	TRUE
AC009560.4	FALSE	FALSE	FALSE	TRUE
AC009562.1	FALSE	TRUE	TRUE	TRUE
AC009690.2	FALSE	TRUE	FALSE	TRUE
AC009899.1	FALSE	FALSE	TRUE	FALSE
AC009961.1	FALSE	TRUE	FALSE	TRUE
AC010168.1	FALSE	FALSE	FALSE	TRUE
AC010260.1	FALSE	FALSE	TRUE	TRUE
AC010478.1	FALSE	FALSE	TRUE	FALSE
AC010551.3	FALSE	TRUE	FALSE	TRUE
AC010615.2	FALSE	FALSE	TRUE	FALSE
AC010735.2	FALSE	FALSE	TRUE	TRUE
AC010976.1	FALSE	FALSE	FALSE	TRUE
AC011092.2	FALSE	FALSE	TRUE	FALSE
AC011346.1	FALSE	TRUE	TRUE	TRUE
AC011405.1	FALSE	FALSE	FALSE	TRUE
AC011447.3	FALSE	FALSE	TRUE	FALSE
AC011455.6	FALSE	FALSE	TRUE	TRUE
AC011476.3	FALSE	TRUE	TRUE	TRUE
AC011603.2	FALSE	TRUE	FALSE	TRUE
AC011933.4	FALSE	FALSE	TRUE	FALSE
AC012078.2	FALSE	FALSE	FALSE	TRUE
AC012404.1	FALSE	TRUE	FALSE	FALSE
AC013265.1	FALSE	FALSE	FALSE	TRUE
AC015878.1	FALSE	FALSE	TRUE	FALSE
AC016590.1	FALSE	FALSE	TRUE	FALSE
AC016642.1	FALSE	FALSE	TRUE	TRUE
AC016705.2	FALSE	FALSE	TRUE	FALSE
AC016723.1	FALSE	FALSE	FALSE	TRUE
AC016821.1	FALSE	TRUE	TRUE	TRUE
AC016831.7	TRUE	TRUE	TRUE	TRUE
AC016907.2	FALSE	FALSE	TRUE	TRUE
AC016987.1	FALSE	FALSE	FALSE	TRUE
AC017101.1	TRUE	TRUE	TRUE	TRUE
AC018462.1	FALSE	TRUE	FALSE	TRUE
AC018816.1	FALSE	TRUE	TRUE	TRUE
AC018832.1	FALSE	FALSE	FALSE	TRUE
AC019197.1	FALSE	FALSE	TRUE	TRUE
AC019205.1	FALSE	TRUE	TRUE	FALSE
AC020687.1	TRUE	TRUE	TRUE	TRUE
AC021127.1	FALSE	FALSE	TRUE	TRUE
AC021231.1	FALSE	FALSE	TRUE	TRUE
AC021683.2	FALSE	TRUE	TRUE	TRUE
AC021683.3	TRUE	TRUE	TRUE	TRUE
AC021683.5	FALSE	FALSE	TRUE	TRUE
AC021752.1	FALSE	FALSE	TRUE	FALSE
AC022126.1	FALSE	FALSE	FALSE	TRUE
AC022325.2	FALSE	FALSE	TRUE	FALSE
AC022433.1	FALSE	FALSE	TRUE	TRUE
AC022784.1	FALSE	FALSE	FALSE	TRUE
AC022893.1	FALSE	FALSE	FALSE	TRUE
AC023424.3	FALSE	FALSE	TRUE	TRUE
AC023480.1	FALSE	TRUE	FALSE	TRUE
AC023509.6	FALSE	FALSE	TRUE	FALSE
AC023906.5	FALSE	FALSE	FALSE	TRUE
AC024563.1	FALSE	FALSE	FALSE	TRUE
AC025043.1	FALSE	TRUE	TRUE	TRUE
AC025159.1	FALSE	TRUE	FALSE	TRUE
AC025164.1	FALSE	TRUE	FALSE	FALSE
AC025263.1	FALSE	FALSE	FALSE	TRUE
AC025434.1	FALSE	FALSE	TRUE	FALSE
AC025682.1	FALSE	TRUE	TRUE	FALSE
AC025809.1	FALSE	TRUE	TRUE	TRUE
AC026202.2	FALSE	FALSE	FALSE	TRUE
AC026803.3	FALSE	FALSE	TRUE	TRUE
AC026894.1	FALSE	FALSE	FALSE	TRUE
AC026991.2	FALSE	TRUE	TRUE	TRUE
AC027601.6	FALSE	TRUE	TRUE	TRUE
AC027682.4	FALSE	FALSE	FALSE	TRUE
AC034111.2	FALSE	FALSE	FALSE	TRUE
AC034195.1	FALSE	FALSE	TRUE	TRUE
AC037487.1	FALSE	FALSE	TRUE	FALSE
AC040168.1	FALSE	TRUE	TRUE	TRUE
AC051619.5	FALSE	FALSE	FALSE	TRUE
AC058791.1	FALSE	TRUE	TRUE	TRUE
AC063980.1	FALSE	TRUE	FALSE	FALSE
AC067773.1	FALSE	TRUE	FALSE	TRUE
AC068282.1	FALSE	TRUE	TRUE	FALSE
AC068533.3	FALSE	FALSE	FALSE	TRUE
AC068633.1	FALSE	FALSE	FALSE	TRUE
AC068888.1	FALSE	FALSE	TRUE	FALSE
AC069133.1	FALSE	TRUE	TRUE	TRUE
AC069437.1	FALSE	FALSE	TRUE	FALSE
AC073167.1	FALSE	FALSE	TRUE	TRUE
AC073343.2	FALSE	FALSE	TRUE	FALSE
AC073389.2	FALSE	FALSE	FALSE	TRUE
AC073475.1	FALSE	FALSE	TRUE	FALSE
AC073571.1	FALSE	FALSE	TRUE	TRUE
AC073878.1	FALSE	FALSE	FALSE	TRUE
AC074032.1	FALSE	TRUE	FALSE	FALSE
AC077690.1	FALSE	TRUE	TRUE	TRUE
AC079296.1	FALSE	FALSE	FALSE	TRUE
AC079447.1	FALSE	TRUE	TRUE	TRUE
AC079465.1	FALSE	TRUE	FALSE	TRUE
AC079781.5	FALSE	TRUE	FALSE	FALSE
AC083870.1	FALSE	FALSE	TRUE	TRUE
AC084198.2	FALSE	FALSE	TRUE	FALSE
AC084759.2	FALSE	FALSE	FALSE	TRUE
AC087280.2	FALSE	FALSE	TRUE	TRUE
AC087457.1	FALSE	TRUE	FALSE	FALSE
AC087500.1	FALSE	FALSE	TRUE	FALSE
AC087855.1	FALSE	TRUE	FALSE	TRUE
AC087855.2	FALSE	FALSE	FALSE	TRUE
AC090204.1	FALSE	FALSE	FALSE	TRUE
AC090578.1	FALSE	TRUE	TRUE	TRUE
AC090945.1	FALSE	FALSE	TRUE	TRUE
AC090993.1	FALSE	TRUE	FALSE	FALSE
AC091646.1	FALSE	FALSE	FALSE	TRUE
AC091826.2	FALSE	FALSE	FALSE	TRUE
AC091885.2	FALSE	FALSE	TRUE	FALSE
AC091887.1	FALSE	TRUE	TRUE	TRUE
AC091938.1	FALSE	TRUE	TRUE	TRUE
AC091946.1	FALSE	TRUE	TRUE	TRUE
AC092040.1	FALSE	TRUE	FALSE	FALSE
AC092100.1	FALSE	TRUE	TRUE	TRUE
AC092120.3	FALSE	FALSE	TRUE	FALSE
AC092338.2	FALSE	FALSE	TRUE	TRUE
AC092567.1	FALSE	TRUE	TRUE	TRUE
AC092674.1	FALSE	FALSE	TRUE	FALSE
AC092683.1	FALSE	TRUE	FALSE	FALSE
AC092691.1	TRUE	TRUE	TRUE	TRUE
AC092691.3	FALSE	FALSE	TRUE	TRUE
AC092745.5	FALSE	TRUE	TRUE	TRUE
AC092802.1	FALSE	TRUE	TRUE	TRUE
AC092821.3	FALSE	FALSE	TRUE	TRUE
AC092835.1	FALSE	FALSE	TRUE	FALSE
AC093158.1	FALSE	FALSE	TRUE	TRUE
AC093496.1	FALSE	TRUE	FALSE	FALSE
AC093849.4	FALSE	FALSE	TRUE	TRUE
AC093865.1	FALSE	FALSE	FALSE	TRUE
AC093879.1	FALSE	TRUE	TRUE	TRUE
AC096576.2	FALSE	FALSE	TRUE	TRUE
AC096576.3	FALSE	FALSE	TRUE	TRUE
AC096747.1	FALSE	TRUE	TRUE	TRUE
AC096751.2	FALSE	FALSE	FALSE	TRUE
AC097376.3	FALSE	TRUE	TRUE	TRUE
AC097460.1	FALSE	FALSE	TRUE	FALSE
AC097522.2	FALSE	FALSE	FALSE	TRUE
AC097534.2	FALSE	TRUE	FALSE	FALSE
AC098829.1	FALSE	TRUE	TRUE	TRUE
AC099788.1	FALSE	FALSE	FALSE	TRUE
AC099850.1	FALSE	FALSE	TRUE	FALSE
AC100793.2	FALSE	TRUE	FALSE	FALSE
AC100800.1	FALSE	TRUE	TRUE	TRUE
AC103876.1	FALSE	FALSE	TRUE	FALSE
AC103923.1	FALSE	FALSE	FALSE	TRUE
AC104117.3	TRUE	FALSE	TRUE	TRUE
AC104123.1	FALSE	FALSE	TRUE	FALSE
AC104365.1	FALSE	FALSE	TRUE	FALSE
AC104781.2	FALSE	TRUE	TRUE	TRUE
AC104803.1	FALSE	TRUE	TRUE	TRUE
AC104806.2	FALSE	FALSE	TRUE	TRUE
AC104827.1	FALSE	FALSE	TRUE	FALSE
AC105001.1	FALSE	FALSE	FALSE	TRUE
AC105206.2	FALSE	FALSE	FALSE	TRUE
AC105230.1	FALSE	TRUE	FALSE	TRUE
AC105285.1	FALSE	FALSE	TRUE	FALSE
AC105383.1	FALSE	FALSE	TRUE	FALSE
AC105402.3	FALSE	FALSE	TRUE	FALSE
AC105916.1	FALSE	FALSE	FALSE	TRUE
AC105942.1	FALSE	FALSE	FALSE	TRUE
AC106791.1	FALSE	TRUE	FALSE	TRUE
AC106897.1	FALSE	TRUE	TRUE	TRUE
AC107021.1	FALSE	TRUE	FALSE	TRUE
AC107068.2	FALSE	FALSE	TRUE	FALSE
AC107072.2	FALSE	TRUE	TRUE	FALSE
AC108047.1	FALSE	TRUE	FALSE	TRUE
AC108169.1	FALSE	TRUE	TRUE	TRUE
AC108519.1	FALSE	FALSE	TRUE	FALSE
AC109439.2	FALSE	FALSE	TRUE	FALSE
AC109441.1	FALSE	FALSE	FALSE	TRUE
AC110285.2	FALSE	TRUE	TRUE	TRUE
AC110296.1	FALSE	TRUE	TRUE	TRUE
AC110772.1	FALSE	FALSE	TRUE	FALSE
AC110772.2	FALSE	FALSE	TRUE	FALSE
AC112178.1	FALSE	FALSE	TRUE	FALSE
AC112196.1	TRUE	TRUE	TRUE	TRUE
AC112481.2	FALSE	TRUE	FALSE	TRUE
AC113346.2	FALSE	FALSE	TRUE	FALSE
AC113386.1	FALSE	FALSE	TRUE	FALSE
AC114316.1	FALSE	FALSE	FALSE	TRUE
AC114689.3	FALSE	FALSE	FALSE	TRUE
AC116099.1	FALSE	FALSE	FALSE	TRUE
AC116565.1	FALSE	FALSE	TRUE	TRUE
AC116616.1	FALSE	FALSE	FALSE	TRUE
AC117481.1	FALSE	TRUE	FALSE	TRUE
AC117528.1	FALSE	FALSE	TRUE	TRUE
AC119673.2	FALSE	TRUE	TRUE	TRUE
AC120193.1	FALSE	FALSE	FALSE	TRUE
AC124852.1	FALSE	FALSE	TRUE	FALSE
AC124854.1	FALSE	TRUE	FALSE	TRUE
AC126696.1	FALSE	FALSE	FALSE	TRUE
AC127035.1	FALSE	FALSE	TRUE	TRUE
AC127526.2	TRUE	FALSE	TRUE	FALSE
AC129803.1	FALSE	FALSE	FALSE	TRUE
AC131568.1	FALSE	FALSE	FALSE	TRUE
AC131934.1	FALSE	FALSE	TRUE	FALSE
AC137810.1	FALSE	FALSE	FALSE	TRUE
AC139887.2	FALSE	TRUE	TRUE	TRUE
AC211433.1	FALSE	TRUE	FALSE	FALSE
AC233296.1	FALSE	TRUE	FALSE	TRUE
AC242426.2	FALSE	FALSE	TRUE	FALSE
AC244033.2	FALSE	TRUE	FALSE	TRUE
ACAD11	FALSE	FALSE	TRUE	TRUE
ACAT1	FALSE	TRUE	FALSE	FALSE
ACAT2	FALSE	TRUE	TRUE	TRUE
ACBD3	FALSE	TRUE	FALSE	FALSE
ACBD5	FALSE	TRUE	FALSE	FALSE
ACD	FALSE	TRUE	FALSE	FALSE
ACER3	FALSE	FALSE	TRUE	FALSE
ACHE	TRUE	TRUE	TRUE	TRUE
ACIN1	FALSE	TRUE	FALSE	FALSE
ACKR1	TRUE	TRUE	TRUE	FALSE
ACLY	FALSE	FALSE	TRUE	FALSE
ACO2	FALSE	TRUE	FALSE	FALSE
ACOT11	FALSE	TRUE	FALSE	TRUE
ACOT9	FALSE	TRUE	TRUE	TRUE
ACOX1	FALSE	TRUE	TRUE	TRUE
ACP5	FALSE	TRUE	FALSE	FALSE
ACSL4	FALSE	TRUE	FALSE	FALSE
ACSM6	FALSE	FALSE	TRUE	FALSE
ACTB	FALSE	TRUE	FALSE	FALSE
ACTL6B	FALSE	TRUE	TRUE	TRUE
ACTN1	FALSE	TRUE	FALSE	TRUE
ACTN4	FALSE	FALSE	TRUE	FALSE
ACTR10	FALSE	FALSE	TRUE	FALSE
ACTR1A	FALSE	TRUE	FALSE	FALSE
ACVR1B	FALSE	TRUE	FALSE	FALSE
ACYP2	FALSE	TRUE	TRUE	TRUE
ADA2	FALSE	FALSE	FALSE	TRUE
ADAM10	FALSE	TRUE	TRUE	TRUE
ADAM12	FALSE	FALSE	TRUE	FALSE
ADAM19	FALSE	TRUE	FALSE	FALSE
ADAM28	FALSE	FALSE	FALSE	TRUE
ADAMTS10	FALSE	FALSE	TRUE	FALSE
ADAMTS2	FALSE	TRUE	FALSE	TRUE
ADAMTSL2	FALSE	FALSE	FALSE	TRUE
ADAMTSL3	FALSE	FALSE	FALSE	TRUE
ADAMTSL4-AS1	FALSE	TRUE	FALSE	FALSE
ADARB2	TRUE	TRUE	TRUE	TRUE
ADARB2-AS1	FALSE	TRUE	TRUE	TRUE
ADCY9	FALSE	FALSE	TRUE	FALSE
ADCYAP1R1	FALSE	FALSE	TRUE	FALSE
ADD1	FALSE	TRUE	FALSE	FALSE
ADD2	FALSE	FALSE	TRUE	FALSE
ADD3	FALSE	TRUE	FALSE	FALSE
ADGRB1	FALSE	FALSE	TRUE	FALSE
ADGRB3	FALSE	TRUE	FALSE	TRUE
ADGRL1	FALSE	FALSE	TRUE	FALSE
ADGRL2	FALSE	FALSE	FALSE	TRUE
ADGRL3	FALSE	FALSE	TRUE	TRUE
ADGRV1	FALSE	TRUE	FALSE	TRUE
ADHFE1	FALSE	FALSE	FALSE	TRUE
ADIPOR2	FALSE	TRUE	TRUE	TRUE
ADK	FALSE	TRUE	TRUE	TRUE
ADNP	FALSE	TRUE	FALSE	FALSE
ADTRP	FALSE	FALSE	FALSE	TRUE
AEBP2	FALSE	TRUE	FALSE	TRUE
AF127577.2	FALSE	FALSE	TRUE	TRUE
AF279873.3	FALSE	TRUE	FALSE	FALSE
AFAP1	FALSE	FALSE	TRUE	TRUE
AFF3	TRUE	TRUE	TRUE	TRUE
AFF4	FALSE	TRUE	FALSE	FALSE
AFTPH	FALSE	TRUE	FALSE	FALSE
AGBL1	FALSE	TRUE	TRUE	TRUE
AGBL1-AS1	FALSE	FALSE	FALSE	TRUE
AGBL3	FALSE	FALSE	TRUE	TRUE
AGBL4	TRUE	TRUE	TRUE	TRUE
AGBL5	FALSE	TRUE	TRUE	TRUE
AGK	FALSE	TRUE	TRUE	FALSE
AGO3	FALSE	TRUE	FALSE	FALSE
AGO4	FALSE	TRUE	FALSE	FALSE
AGPAT5	FALSE	FALSE	TRUE	FALSE
AGPS	FALSE	FALSE	TRUE	FALSE
AGTPBP1	FALSE	TRUE	FALSE	FALSE
AHCTF1	FALSE	FALSE	TRUE	FALSE
AHCYL1	FALSE	TRUE	FALSE	FALSE
AHI1	TRUE	TRUE	FALSE	FALSE
AIFM3	FALSE	TRUE	FALSE	FALSE
AIM2	FALSE	FALSE	TRUE	FALSE
AIPL1	FALSE	TRUE	FALSE	FALSE
AJ011931.2	FALSE	TRUE	FALSE	FALSE
AK1	FALSE	TRUE	FALSE	FALSE
AK2	FALSE	FALSE	FALSE	TRUE
AK4	FALSE	TRUE	FALSE	TRUE
AK8	FALSE	FALSE	FALSE	TRUE
AKAP1	FALSE	TRUE	FALSE	FALSE
AKAP11	FALSE	TRUE	FALSE	FALSE
AKAP8L	FALSE	TRUE	TRUE	FALSE
AKNA	FALSE	TRUE	FALSE	TRUE
AKR1A1	FALSE	TRUE	FALSE	FALSE
AKR1E2	FALSE	FALSE	TRUE	TRUE
AL020995.1	FALSE	FALSE	FALSE	TRUE
AL022097.1	FALSE	FALSE	TRUE	FALSE
AL022238.2	FALSE	TRUE	FALSE	TRUE
AL022724.3	FALSE	FALSE	FALSE	TRUE
AL024474.2	FALSE	FALSE	FALSE	TRUE
AL024508.1	FALSE	FALSE	FALSE	TRUE
AL031280.1	FALSE	FALSE	TRUE	FALSE
AL031428.1	FALSE	FALSE	TRUE	FALSE
AL031731.1	FALSE	FALSE	FALSE	TRUE
AL035458.2	FALSE	FALSE	FALSE	TRUE
AL035587.1	FALSE	FALSE	TRUE	TRUE
AL049828.1	FALSE	TRUE	TRUE	TRUE
AL050403.2	FALSE	TRUE	FALSE	TRUE
AL078459.1	FALSE	FALSE	TRUE	TRUE
AL096803.2	FALSE	FALSE	FALSE	TRUE
AL096854.1	FALSE	TRUE	TRUE	TRUE
AL109615.3	FALSE	FALSE	FALSE	TRUE
AL117336.2	FALSE	FALSE	TRUE	TRUE
AL117381.1	FALSE	FALSE	TRUE	TRUE
AL121933.2	FALSE	TRUE	FALSE	TRUE
AL132780.1	FALSE	FALSE	TRUE	TRUE
AL133227.1	FALSE	FALSE	TRUE	TRUE
AL133493.1	FALSE	TRUE	FALSE	TRUE
AL136171.2	FALSE	FALSE	TRUE	FALSE
AL136456.1	FALSE	FALSE	FALSE	TRUE
AL137100.3	FALSE	TRUE	TRUE	TRUE
AL138733.1	FALSE	FALSE	TRUE	TRUE
AL138999.2	FALSE	FALSE	TRUE	FALSE
AL139022.1	FALSE	TRUE	FALSE	FALSE
AL139260.1	FALSE	TRUE	TRUE	TRUE
AL157392.3	FALSE	TRUE	FALSE	FALSE
AL157829.1	TRUE	TRUE	TRUE	TRUE
AL158055.1	FALSE	FALSE	TRUE	TRUE
AL158068.2	FALSE	FALSE	FALSE	TRUE
AL158077.2	FALSE	TRUE	TRUE	TRUE
AL158801.3	FALSE	FALSE	FALSE	TRUE
AL160408.1	FALSE	FALSE	FALSE	TRUE
AL161443.1	FALSE	FALSE	FALSE	TRUE
AL161757.4	FALSE	TRUE	FALSE	TRUE
AL353689.3	FALSE	FALSE	FALSE	TRUE
AL353759.1	FALSE	TRUE	FALSE	FALSE
AL353784.1	FALSE	FALSE	TRUE	FALSE
AL353803.1	FALSE	FALSE	FALSE	TRUE
AL353803.2	FALSE	TRUE	FALSE	TRUE
AL354696.2	FALSE	FALSE	FALSE	TRUE
AL355076.2	FALSE	FALSE	FALSE	TRUE
AL355612.1	TRUE	TRUE	TRUE	TRUE
AL355881.1	FALSE	TRUE	TRUE	TRUE
AL355916.1	FALSE	TRUE	TRUE	TRUE
AL355999.1	FALSE	FALSE	FALSE	TRUE
AL356094.2	FALSE	FALSE	FALSE	TRUE
AL356113.1	FALSE	TRUE	TRUE	TRUE
AL356599.1	FALSE	TRUE	FALSE	FALSE
AL356737.2	FALSE	FALSE	FALSE	TRUE
AL357153.2	FALSE	TRUE	TRUE	TRUE
AL357873.1	FALSE	FALSE	TRUE	FALSE
AL359232.1	FALSE	FALSE	FALSE	TRUE
AL359513.1	FALSE	FALSE	FALSE	TRUE
AL359636.2	FALSE	FALSE	FALSE	TRUE
AL359706.1	FALSE	FALSE	TRUE	FALSE
AL365356.1	FALSE	TRUE	FALSE	TRUE
AL390242.1	FALSE	FALSE	TRUE	TRUE
AL390957.1	FALSE	FALSE	FALSE	TRUE
AL391152.1	FALSE	TRUE	TRUE	TRUE
AL391839.1	FALSE	FALSE	FALSE	TRUE
AL445248.1	FALSE	FALSE	FALSE	TRUE
AL445433.2	FALSE	TRUE	TRUE	TRUE
AL445928.2	FALSE	FALSE	TRUE	FALSE
AL512422.1	FALSE	TRUE	FALSE	FALSE
AL512662.2	FALSE	FALSE	TRUE	FALSE
AL513365.2	FALSE	FALSE	FALSE	TRUE
AL589843.1	FALSE	FALSE	TRUE	FALSE
AL591043.2	FALSE	FALSE	FALSE	TRUE
AL591519.1	FALSE	TRUE	FALSE	TRUE
AL592183.1	FALSE	TRUE	TRUE	TRUE
AL596451.1	FALSE	FALSE	TRUE	FALSE
AL603839.3	FALSE	FALSE	TRUE	TRUE
AL645568.1	FALSE	FALSE	TRUE	TRUE
AL683813.1	FALSE	FALSE	FALSE	TRUE
AL691403.1	FALSE	TRUE	FALSE	FALSE
AL731769.2	FALSE	FALSE	TRUE	FALSE
ALDH7A1	FALSE	TRUE	TRUE	TRUE
ALDOC	FALSE	TRUE	FALSE	FALSE
ALG13	FALSE	FALSE	TRUE	FALSE
ALG1L9P	FALSE	TRUE	TRUE	TRUE
ALG8	FALSE	FALSE	TRUE	FALSE
ALG9	FALSE	FALSE	TRUE	FALSE
ALK	FALSE	FALSE	TRUE	TRUE
ALKBH5	FALSE	FALSE	TRUE	FALSE
ALOX12-AS1	FALSE	FALSE	TRUE	FALSE
ALS2	FALSE	TRUE	FALSE	FALSE
AMBRA1	TRUE	TRUE	TRUE	TRUE
AMIGO1	FALSE	TRUE	FALSE	FALSE
AMN1	FALSE	FALSE	TRUE	FALSE
AMOTL1	FALSE	FALSE	TRUE	FALSE
AMPH	FALSE	TRUE	FALSE	FALSE
AMY2B	FALSE	TRUE	FALSE	FALSE
ANAPC1	FALSE	FALSE	TRUE	FALSE
ANAPC10	FALSE	FALSE	TRUE	FALSE
ANAPC5	FALSE	TRUE	TRUE	TRUE
ANGEL1	FALSE	FALSE	FALSE	TRUE
ANGPTL1	FALSE	TRUE	FALSE	TRUE
ANK1	TRUE	TRUE	TRUE	TRUE
ANKDD1A	FALSE	TRUE	FALSE	TRUE
ANKFY1	FALSE	FALSE	TRUE	TRUE
ANKIB1	FALSE	TRUE	TRUE	FALSE
ANKMY1	FALSE	FALSE	TRUE	FALSE
ANKMY2	FALSE	TRUE	FALSE	FALSE
ANKRD13A	FALSE	TRUE	TRUE	TRUE
ANKRD16	FALSE	FALSE	TRUE	TRUE
ANKRD23	FALSE	TRUE	FALSE	FALSE
ANKRD26	FALSE	TRUE	FALSE	FALSE
ANKRD27	FALSE	TRUE	TRUE	TRUE
ANKRD28	FALSE	TRUE	FALSE	FALSE
ANKRD34C-AS1	FALSE	FALSE	TRUE	TRUE
ANKRD36	FALSE	TRUE	FALSE	FALSE
ANKRD36B	FALSE	TRUE	FALSE	FALSE
ANKRD36C	FALSE	TRUE	FALSE	FALSE
ANKRD37	FALSE	TRUE	TRUE	TRUE
ANKRD42	FALSE	FALSE	TRUE	FALSE
ANKRD44	FALSE	TRUE	TRUE	TRUE
ANKRD6	FALSE	FALSE	TRUE	FALSE
ANKS1A	TRUE	TRUE	FALSE	FALSE
ANKS1B	TRUE	FALSE	TRUE	FALSE
ANKS3	FALSE	TRUE	TRUE	TRUE
ANKUB1	FALSE	FALSE	TRUE	TRUE
ANO3	TRUE	TRUE	TRUE	TRUE
ANTXR1	FALSE	FALSE	TRUE	FALSE
ANTXR2	FALSE	TRUE	TRUE	TRUE
ANXA6	FALSE	FALSE	TRUE	FALSE
ANXA7	FALSE	TRUE	FALSE	FALSE
AP000442.1	FALSE	TRUE	FALSE	FALSE
AP000721.2	FALSE	FALSE	TRUE	TRUE
AP000857.2	FALSE	TRUE	FALSE	TRUE
AP001011.1	FALSE	FALSE	TRUE	TRUE
AP001120.5	FALSE	FALSE	FALSE	TRUE
AP001172.1	FALSE	FALSE	FALSE	TRUE
AP001266.2	FALSE	FALSE	TRUE	TRUE
AP001341.1	FALSE	FALSE	FALSE	TRUE
AP001347.1	FALSE	FALSE	TRUE	FALSE
AP001442.1	FALSE	FALSE	FALSE	TRUE
AP001528.1	FALSE	FALSE	FALSE	TRUE
AP001825.1	FALSE	TRUE	FALSE	TRUE
AP001831.1	FALSE	TRUE	FALSE	TRUE
AP002336.2	FALSE	TRUE	TRUE	TRUE
AP002370.2	FALSE	TRUE	FALSE	TRUE
AP002381.2	FALSE	TRUE	FALSE	FALSE
AP002812.2	FALSE	TRUE	FALSE	TRUE
AP003025.1	FALSE	FALSE	TRUE	FALSE
AP003025.2	FALSE	FALSE	TRUE	FALSE
AP003086.1	TRUE	TRUE	TRUE	TRUE
AP003110.1	FALSE	FALSE	FALSE	TRUE
AP003393.1	FALSE	TRUE	TRUE	TRUE
AP004608.1	FALSE	TRUE	TRUE	TRUE
AP005131.1	FALSE	FALSE	FALSE	TRUE
AP005131.5	FALSE	FALSE	FALSE	TRUE
AP005901.5	FALSE	TRUE	TRUE	FALSE
AP1B1	FALSE	TRUE	FALSE	FALSE
AP1G1	FALSE	TRUE	FALSE	FALSE
AP2A1	FALSE	TRUE	FALSE	FALSE
AP2A2	FALSE	TRUE	FALSE	FALSE
AP3D1	FALSE	TRUE	FALSE	FALSE
AP3M1	FALSE	TRUE	FALSE	FALSE
AP3M2	FALSE	FALSE	TRUE	TRUE
AP3S2	FALSE	TRUE	TRUE	FALSE
AP4S1	FALSE	FALSE	TRUE	FALSE
AP5Z1	FALSE	FALSE	FALSE	TRUE
APAF1	FALSE	FALSE	TRUE	TRUE
APBA1	FALSE	FALSE	TRUE	FALSE
APBA2	TRUE	TRUE	TRUE	TRUE
APC2	FALSE	TRUE	TRUE	TRUE
APIP	FALSE	TRUE	TRUE	FALSE
APOLD1	FALSE	FALSE	FALSE	TRUE
APOO	FALSE	TRUE	FALSE	FALSE
APP	FALSE	TRUE	TRUE	TRUE
APPBP2	FALSE	TRUE	FALSE	FALSE
APPL1	FALSE	FALSE	TRUE	FALSE
APPL2	TRUE	TRUE	FALSE	FALSE
APTR	FALSE	TRUE	FALSE	FALSE
APTX	FALSE	TRUE	FALSE	FALSE
AQP11	FALSE	TRUE	TRUE	TRUE
AQR	FALSE	TRUE	FALSE	TRUE
ARF4	FALSE	TRUE	FALSE	FALSE
ARFGEF1	FALSE	TRUE	FALSE	FALSE
ARFGEF2	FALSE	TRUE	TRUE	TRUE
ARFIP1	FALSE	TRUE	TRUE	TRUE
ARHGAP1	FALSE	FALSE	FALSE	TRUE
ARHGAP10	FALSE	FALSE	TRUE	FALSE
ARHGAP19	FALSE	FALSE	FALSE	TRUE
ARHGAP21	FALSE	FALSE	TRUE	FALSE
ARHGAP24	FALSE	TRUE	FALSE	TRUE
ARHGAP28	TRUE	TRUE	TRUE	TRUE
ARHGAP29	FALSE	TRUE	FALSE	FALSE
ARHGAP32	FALSE	TRUE	FALSE	FALSE
ARHGAP33	FALSE	TRUE	FALSE	FALSE
ARHGAP35	FALSE	TRUE	TRUE	TRUE
ARHGAP44	FALSE	TRUE	TRUE	FALSE
ARHGAP8	FALSE	FALSE	TRUE	FALSE
ARHGEF11	FALSE	TRUE	FALSE	FALSE
ARHGEF2	FALSE	TRUE	FALSE	FALSE
ARHGEF3	FALSE	TRUE	TRUE	TRUE
ARHGEF33	FALSE	FALSE	TRUE	TRUE
ARHGEF4	FALSE	FALSE	TRUE	TRUE
ARHGEF40	FALSE	FALSE	TRUE	TRUE
ARID1A	FALSE	TRUE	FALSE	FALSE
ARIH1	FALSE	TRUE	FALSE	FALSE
ARIH2	FALSE	TRUE	FALSE	FALSE
ARL13B	FALSE	TRUE	TRUE	TRUE
ARL15	FALSE	TRUE	FALSE	TRUE
ARL17B	FALSE	TRUE	FALSE	FALSE
ARL4A	FALSE	TRUE	FALSE	FALSE
ARL4C	FALSE	TRUE	FALSE	FALSE
ARL5A	FALSE	TRUE	TRUE	TRUE
ARL5C	FALSE	FALSE	TRUE	FALSE
ARL6	FALSE	TRUE	FALSE	TRUE
ARL6IP6	FALSE	TRUE	FALSE	TRUE
ARL8A	FALSE	TRUE	FALSE	FALSE
ARMC10	FALSE	FALSE	TRUE	FALSE
ARMC2	FALSE	TRUE	TRUE	TRUE
ARMC8	FALSE	TRUE	FALSE	FALSE
ARMC9	TRUE	FALSE	TRUE	FALSE
ARMCX4	FALSE	TRUE	TRUE	TRUE
ARMCX5-GPRASP2	FALSE	FALSE	TRUE	FALSE
ARMH1	FALSE	FALSE	FALSE	TRUE
ARMH3	FALSE	TRUE	FALSE	FALSE
ARMH4	FALSE	FALSE	TRUE	FALSE
ARNT	FALSE	TRUE	FALSE	FALSE
ARNT2	FALSE	TRUE	TRUE	TRUE
ARNTL	FALSE	TRUE	FALSE	FALSE
ARPC1A	FALSE	TRUE	FALSE	FALSE
ARPC2	FALSE	FALSE	TRUE	TRUE
ARPC4	FALSE	TRUE	FALSE	FALSE
ARR3	FALSE	TRUE	FALSE	TRUE
ARRB1	FALSE	FALSE	TRUE	FALSE
ARRDC3	FALSE	TRUE	FALSE	TRUE
ARSB	FALSE	TRUE	TRUE	TRUE
AS3MT	FALSE	FALSE	TRUE	TRUE
ASAP1	FALSE	FALSE	TRUE	FALSE
ASB13	FALSE	FALSE	TRUE	TRUE
ASB14	FALSE	FALSE	FALSE	TRUE
ASCC1	FALSE	TRUE	TRUE	TRUE
ASIC1	FALSE	FALSE	TRUE	TRUE
ASL	FALSE	FALSE	TRUE	FALSE
ASPG	FALSE	FALSE	TRUE	TRUE
ASPHD1	FALSE	FALSE	TRUE	FALSE
ASRGL1	FALSE	TRUE	TRUE	TRUE
ASTN1	FALSE	FALSE	TRUE	FALSE
ASTN2	TRUE	TRUE	TRUE	TRUE
ASTN2-AS1	FALSE	FALSE	TRUE	TRUE
ASXL1	FALSE	TRUE	FALSE	FALSE
ASXL2	FALSE	TRUE	TRUE	FALSE
ATAD2	FALSE	FALSE	TRUE	FALSE
ATAD2B	FALSE	TRUE	FALSE	FALSE
ATF1	FALSE	TRUE	TRUE	FALSE
ATF2	FALSE	FALSE	TRUE	FALSE
ATF4	FALSE	TRUE	FALSE	FALSE
ATF6B	FALSE	TRUE	FALSE	FALSE
ATF7	FALSE	FALSE	TRUE	FALSE
ATF7IP	FALSE	TRUE	FALSE	FALSE
ATF7IP2	FALSE	TRUE	TRUE	TRUE
ATG13	FALSE	TRUE	FALSE	TRUE
ATG14	FALSE	FALSE	FALSE	TRUE
ATG16L2	FALSE	FALSE	FALSE	TRUE
ATG3	FALSE	FALSE	FALSE	TRUE
ATG4B	FALSE	TRUE	TRUE	FALSE
ATG4C	FALSE	FALSE	TRUE	FALSE
ATG5	FALSE	TRUE	FALSE	TRUE
ATG9B	FALSE	FALSE	TRUE	TRUE
ATL1	FALSE	TRUE	FALSE	FALSE
ATM	FALSE	TRUE	FALSE	FALSE
ATN1	FALSE	TRUE	FALSE	FALSE
ATOX1	FALSE	TRUE	FALSE	FALSE
ATP10A	FALSE	FALSE	TRUE	TRUE
ATP11A	TRUE	TRUE	TRUE	TRUE
ATP11B	FALSE	TRUE	TRUE	TRUE
ATP13A2	FALSE	FALSE	TRUE	FALSE
ATP1A1	FALSE	TRUE	FALSE	FALSE
ATP1B1	FALSE	FALSE	TRUE	TRUE
ATP1B3	FALSE	TRUE	FALSE	FALSE
ATP2A2	FALSE	TRUE	TRUE	TRUE
ATP2B1-AS1	FALSE	TRUE	FALSE	TRUE
ATP2B2	FALSE	TRUE	FALSE	FALSE
ATP2C1	FALSE	TRUE	FALSE	FALSE
ATP6V0A1	FALSE	TRUE	FALSE	FALSE
ATP6V1C1	FALSE	TRUE	FALSE	FALSE
ATP6V1D	FALSE	TRUE	FALSE	TRUE
ATP8A2	FALSE	TRUE	TRUE	TRUE
ATP8B2	FALSE	FALSE	TRUE	TRUE
ATP9A	TRUE	TRUE	TRUE	TRUE
ATPAF1	FALSE	FALSE	TRUE	TRUE
ATR	FALSE	TRUE	TRUE	TRUE
ATXN1	FALSE	TRUE	FALSE	FALSE
ATXN2L	FALSE	TRUE	FALSE	FALSE
ATXN7	FALSE	TRUE	FALSE	FALSE
AUP1	FALSE	TRUE	FALSE	FALSE
AUXG01000058.1	TRUE	TRUE	TRUE	FALSE
AVIL	FALSE	TRUE	FALSE	TRUE
AZI2	FALSE	TRUE	FALSE	FALSE
AZIN1	FALSE	TRUE	TRUE	FALSE
AZIN1-AS1	FALSE	FALSE	TRUE	FALSE
AZIN2	FALSE	FALSE	TRUE	FALSE
B2M	TRUE	FALSE	FALSE	FALSE
B3GALNT2	TRUE	TRUE	TRUE	TRUE
B3GALT2	FALSE	FALSE	FALSE	TRUE
B3GAT1	FALSE	TRUE	TRUE	TRUE
B3GLCT	FALSE	FALSE	TRUE	FALSE
B4GALNT1	FALSE	FALSE	TRUE	FALSE
B4GALNT4	FALSE	FALSE	TRUE	FALSE
B4GALT6	FALSE	TRUE	FALSE	FALSE
B9D1	FALSE	FALSE	TRUE	FALSE
BABAM2	FALSE	TRUE	FALSE	FALSE
BAG6	FALSE	TRUE	FALSE	FALSE
BAHCC1	FALSE	TRUE	TRUE	TRUE
BAIAP2	FALSE	TRUE	FALSE	FALSE
BANP	FALSE	TRUE	TRUE	TRUE
BAZ1B	FALSE	TRUE	FALSE	FALSE
BAZ2A	FALSE	TRUE	FALSE	FALSE
BAZ2B	FALSE	TRUE	FALSE	FALSE
BBC3	FALSE	TRUE	FALSE	FALSE
BBIP1	FALSE	TRUE	FALSE	FALSE
BBOF1	FALSE	FALSE	TRUE	FALSE
BBS1	FALSE	TRUE	TRUE	TRUE
BBS2	FALSE	TRUE	TRUE	TRUE
BBS5	FALSE	TRUE	TRUE	TRUE
BBS7	FALSE	TRUE	TRUE	TRUE
BBS9	FALSE	TRUE	TRUE	TRUE
BCAP31	FALSE	TRUE	FALSE	FALSE
BCAR1	FALSE	TRUE	FALSE	FALSE
BCAR3	FALSE	FALSE	FALSE	TRUE
BCAS4	FALSE	FALSE	FALSE	TRUE
BCAT1	FALSE	TRUE	FALSE	TRUE
BCAT2	FALSE	FALSE	TRUE	TRUE
BCCIP	FALSE	FALSE	TRUE	TRUE
BCKDHB	FALSE	FALSE	TRUE	TRUE
BCL2L1	TRUE	TRUE	TRUE	TRUE
BCL2L14	FALSE	FALSE	TRUE	FALSE
BCL6	TRUE	TRUE	TRUE	TRUE
BCL7C	FALSE	FALSE	TRUE	TRUE
BCO2	FALSE	FALSE	FALSE	TRUE
BDH2	FALSE	TRUE	TRUE	TRUE
BDP1	FALSE	TRUE	FALSE	FALSE
BEND6	FALSE	FALSE	TRUE	TRUE
BEND7	FALSE	TRUE	TRUE	TRUE
BEX5	FALSE	TRUE	FALSE	FALSE
BHLHE40	FALSE	TRUE	TRUE	TRUE
BHLHE40-AS1	FALSE	TRUE	FALSE	TRUE
BHMT	FALSE	FALSE	FALSE	TRUE
BHMT2	FALSE	FALSE	FALSE	TRUE
BICDL1	FALSE	TRUE	FALSE	FALSE
BICRAL	FALSE	TRUE	FALSE	FALSE
BLVRB	FALSE	FALSE	FALSE	TRUE
BLZF1	FALSE	TRUE	TRUE	TRUE
BMERB1	FALSE	FALSE	TRUE	FALSE
BMP2K	FALSE	FALSE	TRUE	FALSE
BMP7	FALSE	FALSE	TRUE	FALSE
BMPR1A	FALSE	TRUE	FALSE	TRUE
BMT2	FALSE	TRUE	FALSE	FALSE
BNIP3	FALSE	TRUE	TRUE	TRUE
BNIP3L	FALSE	FALSE	TRUE	FALSE
BORCS6	FALSE	TRUE	FALSE	FALSE
BRCA1	FALSE	FALSE	FALSE	TRUE
BRD2	FALSE	TRUE	FALSE	FALSE
BRD4	FALSE	TRUE	FALSE	FALSE
BRD7	FALSE	FALSE	FALSE	TRUE
BRD8	FALSE	TRUE	FALSE	FALSE
BRI3	FALSE	FALSE	TRUE	FALSE
BRI3BP	FALSE	FALSE	TRUE	TRUE
BRINP1	TRUE	TRUE	TRUE	TRUE
BRMS1L	FALSE	TRUE	FALSE	FALSE
BRWD1	FALSE	TRUE	FALSE	FALSE
BTAF1	FALSE	TRUE	FALSE	FALSE
BTBD10	FALSE	TRUE	TRUE	FALSE
BTBD7	FALSE	TRUE	FALSE	FALSE
BTD	FALSE	TRUE	FALSE	TRUE
BTF3L4	FALSE	FALSE	TRUE	TRUE
BTG2	FALSE	TRUE	FALSE	FALSE
BUD23	FALSE	TRUE	FALSE	FALSE
BZW1	FALSE	TRUE	FALSE	FALSE
BZW2	FALSE	TRUE	TRUE	TRUE
C11orf49	TRUE	TRUE	TRUE	TRUE
C11orf54	FALSE	TRUE	FALSE	TRUE
C11orf65	FALSE	FALSE	FALSE	TRUE
C11orf74	FALSE	TRUE	TRUE	TRUE
C11orf80	FALSE	TRUE	TRUE	TRUE
C12orf40	FALSE	FALSE	TRUE	TRUE
C12orf76	FALSE	FALSE	FALSE	TRUE
C14orf132	TRUE	TRUE	TRUE	TRUE
C14orf39	FALSE	FALSE	TRUE	FALSE
C16orf95	FALSE	FALSE	TRUE	FALSE
C16orf96	FALSE	FALSE	FALSE	TRUE
C19orf25	FALSE	TRUE	FALSE	FALSE
C1QTNF7	FALSE	FALSE	TRUE	TRUE
C1S	FALSE	FALSE	FALSE	TRUE
C1orf112	FALSE	FALSE	FALSE	TRUE
C1orf115	FALSE	FALSE	TRUE	TRUE
C1orf159	FALSE	FALSE	TRUE	FALSE
C1orf21	FALSE	FALSE	TRUE	FALSE
C2	FALSE	FALSE	TRUE	FALSE
C20orf194	FALSE	TRUE	FALSE	FALSE
C20orf203	FALSE	FALSE	TRUE	TRUE
C21orf62-AS1	FALSE	TRUE	FALSE	TRUE
C2CD6	FALSE	FALSE	FALSE	TRUE
C2orf27A	FALSE	FALSE	TRUE	FALSE
C2orf72	FALSE	FALSE	TRUE	TRUE
C2orf81	FALSE	FALSE	FALSE	TRUE
C2orf88	FALSE	TRUE	TRUE	TRUE
C3orf14	FALSE	FALSE	TRUE	FALSE
C3orf35	FALSE	FALSE	FALSE	TRUE
C4orf47	FALSE	TRUE	TRUE	TRUE
C6	FALSE	FALSE	TRUE	TRUE
C6orf62	FALSE	TRUE	FALSE	FALSE
C7	TRUE	TRUE	TRUE	TRUE
C8orf31	FALSE	TRUE	TRUE	TRUE
C8orf76	FALSE	FALSE	TRUE	FALSE
C9orf72	FALSE	TRUE	FALSE	FALSE
C9orf78	FALSE	TRUE	FALSE	FALSE
CA1	FALSE	FALSE	TRUE	FALSE
CA13	FALSE	FALSE	TRUE	FALSE
CA2	FALSE	TRUE	FALSE	FALSE
CA3	FALSE	FALSE	TRUE	FALSE
CA5B	FALSE	FALSE	TRUE	FALSE
CAAP1	FALSE	FALSE	TRUE	FALSE
CABIN1	FALSE	TRUE	TRUE	TRUE
CABLES1	FALSE	TRUE	TRUE	TRUE
CABP1	FALSE	FALSE	TRUE	FALSE
CABP2	FALSE	TRUE	FALSE	TRUE
CACNA1A	TRUE	FALSE	TRUE	FALSE
CACNA1B	FALSE	FALSE	TRUE	FALSE
CACNA1C	TRUE	TRUE	TRUE	TRUE
CACNA1C-AS1	FALSE	FALSE	FALSE	TRUE
CACNA1D	FALSE	FALSE	TRUE	FALSE
CACNA1E	FALSE	FALSE	TRUE	FALSE
CACNA1H	FALSE	TRUE	FALSE	TRUE
CACNA2D2	FALSE	TRUE	TRUE	TRUE
CACNA2D3	FALSE	TRUE	FALSE	TRUE
CACNA2D3-AS1	FALSE	FALSE	FALSE	TRUE
CACNG7	FALSE	TRUE	TRUE	TRUE
CACUL1	FALSE	FALSE	TRUE	FALSE
CALD1	TRUE	FALSE	TRUE	TRUE
CALML4	FALSE	TRUE	FALSE	FALSE
CALY	FALSE	FALSE	TRUE	FALSE
CAMK2N1	TRUE	TRUE	TRUE	TRUE
CAMK4	TRUE	FALSE	TRUE	FALSE
CAMKK1	FALSE	TRUE	FALSE	TRUE
CAMKK2	FALSE	FALSE	FALSE	TRUE
CAMKMT	FALSE	TRUE	FALSE	TRUE
CAND2	FALSE	FALSE	TRUE	FALSE
CANX	FALSE	TRUE	TRUE	FALSE
CAPN1	FALSE	FALSE	TRUE	FALSE
CAPN13	FALSE	FALSE	FALSE	TRUE
CAPN7	FALSE	TRUE	FALSE	FALSE
CAPRIN1	FALSE	TRUE	FALSE	TRUE
CAPS2	FALSE	FALSE	TRUE	TRUE
CARF	FALSE	TRUE	FALSE	FALSE
CARMIL1	FALSE	TRUE	TRUE	TRUE
CARNMT1	FALSE	TRUE	FALSE	FALSE
CARS	FALSE	TRUE	TRUE	TRUE
CASC15	FALSE	FALSE	TRUE	FALSE
CASC2	FALSE	FALSE	FALSE	TRUE
CASC3	FALSE	TRUE	FALSE	FALSE
CASC4	FALSE	TRUE	FALSE	FALSE
CASD1	FALSE	TRUE	FALSE	FALSE
CASK	FALSE	TRUE	FALSE	FALSE
CASKIN1	FALSE	FALSE	TRUE	TRUE
CASP6	FALSE	TRUE	FALSE	TRUE
CASP8AP2	FALSE	FALSE	TRUE	FALSE
CASTOR3	FALSE	FALSE	TRUE	TRUE
CATSPER2	FALSE	TRUE	FALSE	FALSE
CBFA2T2	FALSE	TRUE	FALSE	FALSE
CBR4	FALSE	FALSE	TRUE	FALSE
CBWD1	FALSE	TRUE	TRUE	FALSE
CBX6	FALSE	TRUE	FALSE	FALSE
CBX7	FALSE	TRUE	FALSE	FALSE
CC2D2A	FALSE	FALSE	TRUE	TRUE
CC2D2B	FALSE	FALSE	FALSE	TRUE
CCAR1	FALSE	TRUE	TRUE	TRUE
CCDC107	FALSE	TRUE	FALSE	FALSE
CCDC110	FALSE	FALSE	TRUE	TRUE
CCDC13	FALSE	FALSE	TRUE	FALSE
CCDC134	FALSE	FALSE	TRUE	TRUE
CCDC138	FALSE	FALSE	TRUE	FALSE
CCDC14	FALSE	FALSE	TRUE	FALSE
CCDC146	FALSE	TRUE	TRUE	TRUE
CCDC148	TRUE	FALSE	TRUE	FALSE
CCDC148-AS1	FALSE	FALSE	TRUE	FALSE
CCDC149	FALSE	FALSE	TRUE	TRUE
CCDC155	FALSE	TRUE	FALSE	FALSE
CCDC171	FALSE	FALSE	TRUE	FALSE
CCDC18	FALSE	FALSE	FALSE	TRUE
CCDC18-AS1	FALSE	TRUE	FALSE	TRUE
CCDC186	FALSE	TRUE	TRUE	TRUE
CCDC191	FALSE	FALSE	FALSE	TRUE
CCDC192	FALSE	FALSE	FALSE	TRUE
CCDC24	FALSE	FALSE	FALSE	TRUE
CCDC30	FALSE	TRUE	TRUE	TRUE
CCDC40	FALSE	FALSE	TRUE	FALSE
CCDC47	FALSE	FALSE	TRUE	TRUE
CCDC57	FALSE	FALSE	TRUE	TRUE
CCDC6	FALSE	TRUE	TRUE	TRUE
CCDC60	FALSE	FALSE	FALSE	TRUE
CCDC65	FALSE	FALSE	TRUE	FALSE
CCDC66	FALSE	TRUE	FALSE	FALSE
CCDC82	FALSE	TRUE	FALSE	FALSE
CCDC90B	FALSE	FALSE	TRUE	FALSE
CCDC92	TRUE	TRUE	TRUE	TRUE
CCNC	FALSE	TRUE	TRUE	TRUE
CCND2	FALSE	FALSE	TRUE	FALSE
CCNG2	TRUE	TRUE	TRUE	TRUE
CCNH	FALSE	TRUE	FALSE	FALSE
CCNI	TRUE	TRUE	FALSE	FALSE
CCNJL	FALSE	FALSE	TRUE	TRUE
CCNL1	FALSE	TRUE	FALSE	FALSE
CCNT1	FALSE	FALSE	TRUE	FALSE
CCNY	FALSE	TRUE	FALSE	FALSE
CCNYL1	FALSE	FALSE	FALSE	TRUE
CCP110	FALSE	TRUE	TRUE	FALSE
CCPG1	FALSE	TRUE	FALSE	FALSE
CD4	FALSE	FALSE	TRUE	TRUE
CD46	FALSE	TRUE	FALSE	FALSE
CD59	TRUE	TRUE	FALSE	FALSE
CD81	FALSE	FALSE	TRUE	FALSE
CDC14A	FALSE	FALSE	TRUE	FALSE
CDC14B	FALSE	FALSE	TRUE	FALSE
CDC27	FALSE	TRUE	FALSE	FALSE
CDC42	FALSE	FALSE	TRUE	FALSE
CDC42EP4	FALSE	TRUE	FALSE	TRUE
CDC42SE1	FALSE	TRUE	FALSE	FALSE
CDC7	FALSE	FALSE	TRUE	FALSE
CDC73	FALSE	TRUE	FALSE	FALSE
CDCA8	FALSE	FALSE	TRUE	FALSE
CDH10	FALSE	FALSE	TRUE	FALSE
CDH12	TRUE	TRUE	TRUE	TRUE
CDH13	FALSE	FALSE	TRUE	FALSE
CDH20	FALSE	TRUE	FALSE	TRUE
CDH22	TRUE	TRUE	TRUE	TRUE
CDH6	FALSE	TRUE	TRUE	TRUE
CDHR1	FALSE	TRUE	FALSE	TRUE
CDHR2	FALSE	FALSE	FALSE	TRUE
CDIP1	FALSE	TRUE	FALSE	FALSE
CDK11B	FALSE	TRUE	FALSE	FALSE
CDK13	FALSE	TRUE	FALSE	FALSE
CDK14	FALSE	FALSE	TRUE	FALSE
CDK18	FALSE	FALSE	FALSE	TRUE
CDK19	FALSE	FALSE	FALSE	TRUE
CDK5RAP2	FALSE	TRUE	FALSE	FALSE
CDK5RAP3	FALSE	TRUE	FALSE	FALSE
CDK6	FALSE	FALSE	TRUE	FALSE
CDK7	FALSE	FALSE	FALSE	TRUE
CDK8	FALSE	TRUE	FALSE	TRUE
CDKL2	FALSE	TRUE	TRUE	TRUE
CDKL3	FALSE	TRUE	TRUE	TRUE
CDKN2D	FALSE	TRUE	FALSE	FALSE
CDON	FALSE	FALSE	TRUE	TRUE
CDR2	FALSE	TRUE	TRUE	TRUE
CDRT4	FALSE	FALSE	TRUE	FALSE
CDYL	FALSE	FALSE	TRUE	FALSE
CEACAM1	FALSE	FALSE	FALSE	TRUE
CEBPB	FALSE	TRUE	FALSE	TRUE
CEBPB-AS1	FALSE	FALSE	FALSE	TRUE
CEBPZ	FALSE	TRUE	TRUE	FALSE
CEBPZOS	FALSE	FALSE	TRUE	TRUE
CELF1	FALSE	TRUE	FALSE	FALSE
CELF4	TRUE	FALSE	TRUE	FALSE
CELF5	TRUE	TRUE	FALSE	FALSE
CELF6	FALSE	TRUE	FALSE	FALSE
CEMIP	FALSE	FALSE	TRUE	TRUE
CENPC	FALSE	TRUE	FALSE	FALSE
CENPI	FALSE	FALSE	FALSE	TRUE
CENPT	FALSE	TRUE	FALSE	FALSE
CEP126	TRUE	TRUE	TRUE	TRUE
CEP128	FALSE	FALSE	TRUE	FALSE
CEP162	FALSE	TRUE	TRUE	TRUE
CEP350	FALSE	TRUE	FALSE	FALSE
CEP63	FALSE	FALSE	TRUE	FALSE
CEP70	FALSE	TRUE	TRUE	TRUE
CEP76	FALSE	FALSE	TRUE	FALSE
CEP78	FALSE	TRUE	TRUE	TRUE
CEP89	FALSE	FALSE	TRUE	TRUE
CEP95	FALSE	TRUE	TRUE	FALSE
CERK	FALSE	FALSE	TRUE	FALSE
CERNA1	FALSE	TRUE	FALSE	TRUE
CERS3	FALSE	TRUE	FALSE	TRUE
CERS3-AS1	FALSE	FALSE	FALSE	TRUE
CERS4	FALSE	TRUE	FALSE	FALSE
CERS5	FALSE	TRUE	TRUE	TRUE
CERT1	FALSE	TRUE	FALSE	FALSE
CFAP221	FALSE	TRUE	TRUE	TRUE
CFAP36	FALSE	TRUE	TRUE	TRUE
CFAP46	FALSE	FALSE	TRUE	TRUE
CFAP47	FALSE	FALSE	FALSE	TRUE
CFAP52	FALSE	FALSE	FALSE	TRUE
CFAP53	FALSE	FALSE	FALSE	TRUE
CFAP69	FALSE	FALSE	FALSE	TRUE
CFAP70	FALSE	FALSE	FALSE	TRUE
CFC1	FALSE	TRUE	TRUE	TRUE
CFI	FALSE	FALSE	FALSE	TRUE
CHAF1B	FALSE	FALSE	FALSE	TRUE
CHCHD10	FALSE	TRUE	TRUE	TRUE
CHCHD6	FALSE	FALSE	TRUE	FALSE
CHD3	FALSE	TRUE	FALSE	FALSE
CHD4	FALSE	TRUE	FALSE	FALSE
CHD5	FALSE	TRUE	TRUE	TRUE
CHD7	FALSE	TRUE	FALSE	TRUE
CHD8	FALSE	FALSE	TRUE	FALSE
CHEK2	FALSE	FALSE	TRUE	TRUE
CHFR	FALSE	TRUE	TRUE	TRUE
CHGA	FALSE	TRUE	FALSE	TRUE
CHIC2	FALSE	FALSE	TRUE	FALSE
CHKA	TRUE	TRUE	TRUE	TRUE
CHKB-DT	FALSE	TRUE	TRUE	TRUE
CHL1	FALSE	FALSE	FALSE	TRUE
CHM	FALSE	TRUE	FALSE	TRUE
CHMP4A	FALSE	FALSE	TRUE	FALSE
CHN1	TRUE	FALSE	TRUE	FALSE
CHORDC1	FALSE	TRUE	FALSE	FALSE
CHP1	FALSE	TRUE	FALSE	FALSE
CHPT1	FALSE	TRUE	TRUE	FALSE
CHRM2	FALSE	FALSE	TRUE	FALSE
CHST15	FALSE	FALSE	TRUE	FALSE
CHST2	FALSE	TRUE	FALSE	TRUE
CHUK	FALSE	TRUE	FALSE	FALSE
CHURC1	FALSE	TRUE	TRUE	FALSE
CIAO1	FALSE	TRUE	FALSE	FALSE
CIART	FALSE	TRUE	FALSE	TRUE
CISD1	FALSE	FALSE	TRUE	FALSE
CIT	TRUE	TRUE	TRUE	TRUE
CIZ1	FALSE	TRUE	FALSE	FALSE
CKAP2	FALSE	TRUE	FALSE	TRUE
CKLF	FALSE	FALSE	TRUE	FALSE
CKS2	FALSE	TRUE	FALSE	FALSE
CLASRP	FALSE	TRUE	FALSE	FALSE
CLCN4	FALSE	TRUE	TRUE	FALSE
CLCN5	FALSE	TRUE	FALSE	FALSE
CLCN7	FALSE	TRUE	FALSE	FALSE
CLDN20	FALSE	FALSE	FALSE	TRUE
CLEC11A	FALSE	TRUE	FALSE	FALSE
CLEC2D	FALSE	FALSE	FALSE	TRUE
CLHC1	FALSE	FALSE	TRUE	TRUE
CLIC4	FALSE	FALSE	FALSE	TRUE
CLIP4	FALSE	TRUE	FALSE	FALSE
CLK4	FALSE	TRUE	FALSE	FALSE
CLOCK	FALSE	TRUE	FALSE	FALSE
CLSTN2	FALSE	FALSE	TRUE	FALSE
CLTC	TRUE	TRUE	FALSE	FALSE
CLTCL1	FALSE	FALSE	FALSE	TRUE
CLU	FALSE	FALSE	FALSE	TRUE
CLUAP1	FALSE	FALSE	TRUE	TRUE
CMC2	FALSE	TRUE	FALSE	TRUE
CMIP	FALSE	FALSE	TRUE	FALSE
CMSS1	FALSE	TRUE	FALSE	TRUE
CMTM6	FALSE	TRUE	FALSE	TRUE
CMTM7	FALSE	TRUE	FALSE	TRUE
CNIH3	FALSE	FALSE	TRUE	TRUE
CNN3	FALSE	TRUE	TRUE	TRUE
CNNM1	TRUE	TRUE	TRUE	TRUE
CNNM2	FALSE	TRUE	FALSE	TRUE
CNOT10	FALSE	FALSE	TRUE	TRUE
CNOT7	FALSE	TRUE	FALSE	FALSE
CNPY2	FALSE	FALSE	TRUE	FALSE
CNRIP1	FALSE	FALSE	TRUE	FALSE
CNST	FALSE	TRUE	TRUE	TRUE
CNTFR	FALSE	TRUE	TRUE	TRUE
CNTFR-AS1	FALSE	FALSE	FALSE	TRUE
CNTLN	FALSE	TRUE	TRUE	TRUE
CNTN1	TRUE	TRUE	FALSE	FALSE
CNTNAP2	FALSE	FALSE	TRUE	FALSE
CNTRL	FALSE	TRUE	TRUE	TRUE
COG6	FALSE	TRUE	TRUE	FALSE
COL21A1	FALSE	FALSE	FALSE	TRUE
COL25A1	FALSE	FALSE	TRUE	TRUE
COL4A1	FALSE	TRUE	TRUE	TRUE
COL4A2	TRUE	TRUE	TRUE	TRUE
COL5A1	FALSE	FALSE	TRUE	FALSE
COL5A2	FALSE	FALSE	FALSE	TRUE
COL5A3	FALSE	TRUE	FALSE	FALSE
COL6A1	FALSE	FALSE	TRUE	FALSE
COL6A6	FALSE	FALSE	FALSE	TRUE
COMMD1	FALSE	TRUE	FALSE	TRUE
COMMD10	FALSE	TRUE	FALSE	FALSE
COMMD7	FALSE	TRUE	FALSE	FALSE
COP1	FALSE	TRUE	FALSE	FALSE
COPA	FALSE	TRUE	TRUE	FALSE
COPB2	FALSE	TRUE	FALSE	FALSE
COPG2	FALSE	TRUE	FALSE	FALSE
COQ10B	FALSE	TRUE	FALSE	FALSE
COQ4	FALSE	TRUE	FALSE	FALSE
COQ8A	FALSE	FALSE	TRUE	FALSE
CORIN	FALSE	FALSE	FALSE	TRUE
CORO1C	FALSE	FALSE	TRUE	FALSE
CORO7	FALSE	TRUE	FALSE	FALSE
COTL1	FALSE	TRUE	FALSE	TRUE
COX16	FALSE	TRUE	FALSE	FALSE
COX4I2	FALSE	FALSE	FALSE	TRUE
CPD	FALSE	TRUE	FALSE	TRUE
CPEB3	TRUE	TRUE	FALSE	FALSE
CPLX1	FALSE	TRUE	TRUE	TRUE
CPLX3	FALSE	TRUE	FALSE	TRUE
CPNE6	FALSE	TRUE	FALSE	FALSE
CPNE7	FALSE	TRUE	TRUE	TRUE
CPSF3	FALSE	TRUE	FALSE	FALSE
CPSF7	FALSE	TRUE	FALSE	FALSE
CRAT	FALSE	FALSE	FALSE	TRUE
CRCP	FALSE	TRUE	FALSE	TRUE
CREB1	FALSE	TRUE	FALSE	FALSE
CREBBP	FALSE	TRUE	FALSE	FALSE
CREBRF	FALSE	TRUE	TRUE	FALSE
CREBZF	FALSE	TRUE	FALSE	FALSE
CRELD1	FALSE	TRUE	FALSE	FALSE
CREM	FALSE	TRUE	FALSE	TRUE
CRIM1	FALSE	TRUE	TRUE	TRUE
CROCC	FALSE	TRUE	FALSE	FALSE
CROT	FALSE	TRUE	TRUE	TRUE
CRTC3	FALSE	TRUE	TRUE	FALSE
CRY1	FALSE	TRUE	FALSE	TRUE
CRY2	FALSE	TRUE	FALSE	FALSE
CRYBG3	FALSE	TRUE	FALSE	TRUE
CRYL1	FALSE	FALSE	TRUE	FALSE
CRYZ	FALSE	FALSE	FALSE	TRUE
CRYZL1	FALSE	TRUE	TRUE	TRUE
CS	FALSE	TRUE	FALSE	FALSE
CSGALNACT2	TRUE	TRUE	TRUE	TRUE
CSK	FALSE	FALSE	FALSE	TRUE
CSKMT	FALSE	TRUE	FALSE	FALSE
CSMD1	TRUE	TRUE	TRUE	TRUE
CSMD2	FALSE	TRUE	FALSE	TRUE
CSNK1G1	FALSE	TRUE	FALSE	TRUE
CSPG5	FALSE	TRUE	FALSE	FALSE
CSPP1	FALSE	TRUE	TRUE	TRUE
CSRNP3	TRUE	TRUE	FALSE	FALSE
CSTF3	FALSE	TRUE	FALSE	FALSE
CTCF	FALSE	TRUE	FALSE	FALSE
CTDSPL	FALSE	FALSE	TRUE	FALSE
CTDSPL2	FALSE	TRUE	FALSE	FALSE
CTNNA1	FALSE	TRUE	TRUE	TRUE
CTNNA3	TRUE	FALSE	TRUE	TRUE
CTNNAL1	TRUE	TRUE	TRUE	TRUE
CTNNBL1	FALSE	FALSE	TRUE	TRUE
CTNND1	FALSE	TRUE	TRUE	TRUE
CTNS	FALSE	FALSE	FALSE	TRUE
CTPS1	FALSE	TRUE	TRUE	TRUE
CTPS2	FALSE	FALSE	TRUE	FALSE
CTR9	FALSE	TRUE	FALSE	FALSE
CTSA	FALSE	TRUE	FALSE	FALSE
CTSB	FALSE	TRUE	FALSE	TRUE
CTSF	FALSE	FALSE	TRUE	TRUE
CTSK	FALSE	TRUE	FALSE	FALSE
CTSL	FALSE	TRUE	FALSE	FALSE
CTTNBP2	TRUE	TRUE	TRUE	TRUE
CTTNBP2NL	FALSE	TRUE	FALSE	FALSE
CUBN	FALSE	TRUE	FALSE	TRUE
CUEDC1	FALSE	TRUE	FALSE	TRUE
CUL1	FALSE	TRUE	FALSE	FALSE
CUL3	FALSE	TRUE	FALSE	FALSE
CUL4A	FALSE	FALSE	TRUE	FALSE
CUX2	FALSE	FALSE	TRUE	FALSE
CWC27	FALSE	TRUE	FALSE	FALSE
CX3CL1	FALSE	TRUE	FALSE	TRUE
CXCL13	FALSE	FALSE	TRUE	FALSE
CXXC4	FALSE	TRUE	TRUE	FALSE
CXXC4-AS1	FALSE	FALSE	TRUE	TRUE
CYB5A	FALSE	TRUE	FALSE	TRUE
CYB5B	FALSE	TRUE	TRUE	FALSE
CYB5D2	FALSE	TRUE	TRUE	FALSE
CYB5R1	FALSE	TRUE	FALSE	FALSE
CYB5R4	FALSE	FALSE	TRUE	FALSE
CYFIP2	TRUE	TRUE	FALSE	FALSE
CYHR1	FALSE	TRUE	FALSE	FALSE
CYLD	FALSE	TRUE	FALSE	FALSE
CYP20A1	FALSE	FALSE	FALSE	TRUE
CYP27A1	FALSE	TRUE	TRUE	TRUE
CYP2E1	FALSE	FALSE	FALSE	TRUE
CYP2R1	FALSE	TRUE	FALSE	FALSE
CYP46A1	FALSE	TRUE	TRUE	TRUE
CYP4V2	FALSE	TRUE	FALSE	FALSE
CYP51A1	FALSE	TRUE	TRUE	TRUE
CYTH1	FALSE	TRUE	FALSE	FALSE
DAAM1	FALSE	FALSE	FALSE	TRUE
DAB1	FALSE	TRUE	TRUE	TRUE
DACT3	FALSE	FALSE	TRUE	FALSE
DAGLA	FALSE	FALSE	TRUE	FALSE
DALRD3	FALSE	TRUE	FALSE	FALSE
DANCR	TRUE	TRUE	FALSE	FALSE
DAP3	FALSE	TRUE	TRUE	FALSE
DAPK1	FALSE	TRUE	FALSE	FALSE
DARS-AS1	FALSE	FALSE	TRUE	TRUE
DAZAP1	FALSE	TRUE	FALSE	FALSE
DBT	FALSE	FALSE	TRUE	FALSE
DCAF10	FALSE	TRUE	TRUE	FALSE
DCAF17	FALSE	FALSE	TRUE	FALSE
DCAF5	FALSE	FALSE	TRUE	FALSE
DCAF6	FALSE	TRUE	FALSE	FALSE
DCAF8	FALSE	TRUE	FALSE	FALSE
DCAKD	FALSE	TRUE	TRUE	TRUE
DCBLD2	FALSE	FALSE	TRUE	FALSE
DCLK2	TRUE	TRUE	TRUE	TRUE
DCLRE1C	FALSE	TRUE	FALSE	TRUE
DCN	FALSE	TRUE	FALSE	FALSE
DCP1A	FALSE	TRUE	FALSE	FALSE
DCP1B	FALSE	FALSE	TRUE	TRUE
DCP2	FALSE	TRUE	FALSE	TRUE
DCTN4	FALSE	TRUE	FALSE	FALSE
DCUN1D2	FALSE	FALSE	FALSE	TRUE
DCUN1D4	FALSE	TRUE	FALSE	FALSE
DDAH1	FALSE	FALSE	TRUE	TRUE
DDB1	FALSE	TRUE	TRUE	TRUE
DDHD2	FALSE	TRUE	TRUE	TRUE
DDI2	FALSE	FALSE	TRUE	FALSE
DDIT3	FALSE	TRUE	FALSE	TRUE
DDIT4	FALSE	TRUE	TRUE	TRUE
DDX19A	FALSE	FALSE	TRUE	FALSE
DDX20	FALSE	FALSE	TRUE	TRUE
DDX21	FALSE	TRUE	TRUE	FALSE
DDX31	FALSE	FALSE	TRUE	FALSE
DDX42	FALSE	TRUE	FALSE	FALSE
DDX50	FALSE	TRUE	TRUE	TRUE
DDX52	FALSE	TRUE	FALSE	FALSE
DEAF1	FALSE	FALSE	TRUE	FALSE
DEF8	FALSE	TRUE	FALSE	FALSE
DEGS1	FALSE	TRUE	FALSE	FALSE
DEK	FALSE	TRUE	FALSE	FALSE
DENND1B	FALSE	TRUE	FALSE	FALSE
DENND2A	FALSE	TRUE	FALSE	TRUE
DENND2C	FALSE	TRUE	FALSE	TRUE
DENND3	FALSE	FALSE	FALSE	TRUE
DENND4B	FALSE	FALSE	TRUE	FALSE
DENND4C	TRUE	TRUE	FALSE	FALSE
DENND6A	FALSE	FALSE	TRUE	FALSE
DENND6A-AS1	FALSE	FALSE	TRUE	FALSE
DEPDC5	FALSE	TRUE	TRUE	TRUE
DEPTOR	FALSE	FALSE	TRUE	FALSE
DFFB	FALSE	FALSE	TRUE	FALSE
DGCR2	FALSE	FALSE	TRUE	FALSE
DGCR9	FALSE	TRUE	TRUE	TRUE
DGKZ	FALSE	TRUE	TRUE	TRUE
DGLUCY	FALSE	FALSE	TRUE	FALSE
DHDDS	FALSE	TRUE	TRUE	TRUE
DHRS3	FALSE	TRUE	TRUE	TRUE
DHRS4-AS1	FALSE	TRUE	FALSE	TRUE
DHRS4L2	FALSE	TRUE	FALSE	TRUE
DHRS7B	FALSE	TRUE	FALSE	FALSE
DHX15	FALSE	TRUE	FALSE	FALSE
DHX32	FALSE	TRUE	TRUE	TRUE
DHX34	FALSE	FALSE	TRUE	FALSE
DHX40	FALSE	FALSE	TRUE	TRUE
DHX57	FALSE	TRUE	TRUE	TRUE
DHX8	FALSE	FALSE	TRUE	TRUE
DHX9	FALSE	TRUE	FALSE	FALSE
DIAPH1	FALSE	FALSE	TRUE	TRUE
DIMT1	FALSE	FALSE	TRUE	TRUE
DIO2-AS1	FALSE	FALSE	FALSE	TRUE
DIP2A	FALSE	TRUE	FALSE	FALSE
DIP2B	FALSE	TRUE	FALSE	FALSE
DIP2C	FALSE	TRUE	FALSE	FALSE
DIPK1A	TRUE	TRUE	TRUE	TRUE
DIRAS2	FALSE	TRUE	FALSE	FALSE
DIRC3	FALSE	FALSE	FALSE	TRUE
DIRC3-AS1	FALSE	FALSE	FALSE	TRUE
DIS3	FALSE	TRUE	FALSE	FALSE
DIS3L	FALSE	TRUE	FALSE	FALSE
DIS3L2	FALSE	TRUE	FALSE	FALSE
DISC1	TRUE	FALSE	TRUE	FALSE
DIXDC1	TRUE	FALSE	TRUE	FALSE
DLG1	FALSE	FALSE	TRUE	FALSE
DLG2	FALSE	TRUE	FALSE	TRUE
DLG3	FALSE	TRUE	TRUE	TRUE
DLG4	FALSE	TRUE	FALSE	FALSE
DLGAP1	FALSE	TRUE	TRUE	TRUE
DLGAP1-AS3	FALSE	FALSE	FALSE	TRUE
DLGAP1-AS4	FALSE	FALSE	TRUE	TRUE
DLGAP1-AS5	FALSE	FALSE	TRUE	TRUE
DLGAP4	FALSE	TRUE	FALSE	FALSE
DMBX1	FALSE	FALSE	FALSE	TRUE
DMGDH	FALSE	FALSE	FALSE	TRUE
DMXL1	FALSE	TRUE	FALSE	FALSE
DNAAF4	FALSE	TRUE	TRUE	TRUE
DNAH10	FALSE	FALSE	TRUE	FALSE
DNAH14	FALSE	FALSE	TRUE	FALSE
DNAH17	FALSE	TRUE	FALSE	TRUE
DNAH9	FALSE	FALSE	TRUE	TRUE
DNAJB1	FALSE	TRUE	FALSE	FALSE
DNAJB9	FALSE	TRUE	FALSE	FALSE
DNAJC1	FALSE	TRUE	FALSE	FALSE
DNAJC13	FALSE	FALSE	FALSE	TRUE
DNAJC15	FALSE	TRUE	FALSE	FALSE
DNAJC17	FALSE	FALSE	TRUE	TRUE
DNAJC18	FALSE	TRUE	TRUE	FALSE
DNAJC2	FALSE	FALSE	TRUE	TRUE
DNAJC3	FALSE	TRUE	FALSE	FALSE
DNAJC5	FALSE	TRUE	TRUE	TRUE
DNAJC7	FALSE	FALSE	TRUE	TRUE
DNAJC9	FALSE	TRUE	TRUE	TRUE
DNER	TRUE	TRUE	TRUE	TRUE
DNM1L	FALSE	TRUE	FALSE	FALSE
DNM2	FALSE	TRUE	FALSE	FALSE
DNM3	TRUE	TRUE	TRUE	TRUE
DNMT3A	FALSE	TRUE	FALSE	FALSE
DOCK10	FALSE	TRUE	FALSE	TRUE
DOCK4	FALSE	TRUE	TRUE	TRUE
DOCK7	FALSE	TRUE	TRUE	TRUE
DOCK9	FALSE	TRUE	FALSE	TRUE
DOP1A	FALSE	TRUE	FALSE	FALSE
DPF1	FALSE	TRUE	TRUE	TRUE
DPF2	FALSE	FALSE	TRUE	FALSE
DPH6	FALSE	FALSE	TRUE	TRUE
DPP7	TRUE	TRUE	FALSE	FALSE
DPP8	FALSE	TRUE	TRUE	TRUE
DPYSL3	TRUE	TRUE	TRUE	TRUE
DPYSL4	FALSE	TRUE	TRUE	FALSE
DRG1	FALSE	FALSE	FALSE	TRUE
DROSHA	FALSE	TRUE	TRUE	TRUE
DSE	FALSE	TRUE	TRUE	TRUE
DSEL	FALSE	TRUE	FALSE	TRUE
DSTYK	FALSE	TRUE	FALSE	FALSE
DTNBP1	FALSE	TRUE	FALSE	TRUE
DTWD1	FALSE	FALSE	TRUE	FALSE
DTX1	FALSE	FALSE	TRUE	TRUE
DUOX1	TRUE	TRUE	TRUE	TRUE
DUSP10	FALSE	FALSE	FALSE	TRUE
DUT	FALSE	TRUE	TRUE	FALSE
DYM	FALSE	TRUE	FALSE	FALSE
DYNC1I2	FALSE	TRUE	FALSE	FALSE
DYNC1LI1	FALSE	TRUE	FALSE	FALSE
DYNC2H1	FALSE	TRUE	TRUE	TRUE
DYNC2LI1	FALSE	TRUE	TRUE	TRUE
DYRK1A	FALSE	TRUE	FALSE	FALSE
DZANK1	FALSE	FALSE	TRUE	TRUE
DZIP1	FALSE	TRUE	TRUE	TRUE
EBF4	FALSE	FALSE	TRUE	FALSE
ECD	FALSE	TRUE	TRUE	FALSE
ECE2	FALSE	FALSE	TRUE	FALSE
ECHDC2	FALSE	TRUE	TRUE	TRUE
EDEM3	FALSE	TRUE	FALSE	FALSE
EDRF1	FALSE	FALSE	TRUE	FALSE
EEF1D	FALSE	TRUE	FALSE	FALSE
EEFSEC	FALSE	FALSE	TRUE	TRUE
EEPD1	TRUE	TRUE	TRUE	TRUE
EFCAB11	FALSE	TRUE	TRUE	TRUE
EFCAB13	FALSE	FALSE	TRUE	TRUE
EFCAB2	FALSE	TRUE	FALSE	TRUE
EFCAB6	FALSE	FALSE	TRUE	TRUE
EFCAB7	FALSE	FALSE	TRUE	TRUE
EFEMP2	FALSE	TRUE	FALSE	FALSE
EFHC1	FALSE	TRUE	TRUE	TRUE
EFNB2	FALSE	FALSE	FALSE	TRUE
EFS	FALSE	TRUE	TRUE	TRUE
EFTUD2	FALSE	TRUE	FALSE	FALSE
EGFLAM	FALSE	FALSE	FALSE	TRUE
EGLN1	FALSE	TRUE	TRUE	TRUE
EGR1	FALSE	TRUE	FALSE	FALSE
EHBP1	TRUE	TRUE	TRUE	TRUE
EHMT1	FALSE	TRUE	FALSE	FALSE
EIF1AX	FALSE	FALSE	TRUE	FALSE
EIF1B-AS1	FALSE	TRUE	TRUE	TRUE
EIF2AK2	FALSE	FALSE	TRUE	FALSE
EIF2AK3	TRUE	TRUE	TRUE	TRUE
EIF2AK4	FALSE	FALSE	TRUE	FALSE
EIF2B3	FALSE	TRUE	TRUE	TRUE
EIF2B5	FALSE	TRUE	FALSE	FALSE
EIF2S2	FALSE	TRUE	TRUE	TRUE
EIF3A	FALSE	TRUE	FALSE	FALSE
EIF3B	FALSE	TRUE	TRUE	FALSE
EIF3J	FALSE	TRUE	FALSE	FALSE
EIF3M	FALSE	TRUE	FALSE	FALSE
EIF4A3	FALSE	TRUE	FALSE	FALSE
EIF4E1B	FALSE	TRUE	FALSE	TRUE
EIF4E3	FALSE	FALSE	TRUE	FALSE
EIF4EBP1	FALSE	FALSE	FALSE	TRUE
EIF4EBP2	FALSE	TRUE	FALSE	FALSE
EIF4ENIF1	FALSE	TRUE	TRUE	TRUE
ELF2	FALSE	TRUE	FALSE	FALSE
ELFN2	FALSE	TRUE	FALSE	FALSE
ELK4	TRUE	TRUE	FALSE	FALSE
ELL2	FALSE	FALSE	TRUE	FALSE
ELMO2	FALSE	TRUE	TRUE	TRUE
ELMSAN1	FALSE	TRUE	TRUE	TRUE
ELOA-AS1	FALSE	FALSE	TRUE	FALSE
ELOVL4	FALSE	TRUE	FALSE	FALSE
ELOVL6	FALSE	FALSE	TRUE	FALSE
ELP1	FALSE	FALSE	TRUE	TRUE
ELP2	FALSE	TRUE	FALSE	FALSE
ELP3	FALSE	TRUE	TRUE	TRUE
EMC2	FALSE	TRUE	FALSE	FALSE
EMC3	FALSE	TRUE	FALSE	FALSE
EML1	TRUE	TRUE	TRUE	TRUE
EML2	FALSE	TRUE	TRUE	FALSE
EML4	FALSE	TRUE	FALSE	FALSE
EML5	TRUE	TRUE	FALSE	FALSE
EML6	TRUE	TRUE	TRUE	TRUE
EMSY	FALSE	FALSE	TRUE	FALSE
ENKUR	FALSE	FALSE	TRUE	FALSE
ENO1	FALSE	TRUE	TRUE	TRUE
ENO4	FALSE	FALSE	FALSE	TRUE
ENOSF1	TRUE	TRUE	FALSE	FALSE
ENOX1	FALSE	TRUE	FALSE	TRUE
ENPP2	FALSE	TRUE	FALSE	TRUE
ENTPD1-AS1	FALSE	TRUE	TRUE	TRUE
ENTPD3-AS1	FALSE	TRUE	FALSE	TRUE
ENY2	FALSE	TRUE	TRUE	FALSE
EP300	FALSE	TRUE	FALSE	FALSE
EPB41L1	FALSE	TRUE	TRUE	TRUE
EPB41L2	FALSE	FALSE	TRUE	TRUE
EPB41L5	FALSE	TRUE	FALSE	FALSE
EPC2	FALSE	FALSE	TRUE	FALSE
EPG5	FALSE	FALSE	TRUE	FALSE
EPHA1-AS1	FALSE	FALSE	FALSE	TRUE
EPHA10	FALSE	FALSE	TRUE	FALSE
EPHA7	FALSE	FALSE	TRUE	FALSE
EPHA8	FALSE	FALSE	TRUE	TRUE
EPHB1	FALSE	FALSE	TRUE	TRUE
EPM2A	FALSE	FALSE	TRUE	FALSE
EPM2AIP1	FALSE	TRUE	FALSE	FALSE
EPRS	FALSE	TRUE	TRUE	TRUE
ERAP1	FALSE	TRUE	FALSE	FALSE
ERC1	FALSE	TRUE	FALSE	FALSE
ERC2	FALSE	TRUE	FALSE	FALSE
ERCC1	FALSE	TRUE	FALSE	FALSE
ERG28	FALSE	TRUE	FALSE	FALSE
ERGIC2	FALSE	TRUE	FALSE	FALSE
ERI2	FALSE	FALSE	FALSE	TRUE
ERI3	FALSE	FALSE	TRUE	FALSE
ERICH3	FALSE	FALSE	TRUE	TRUE
ERICH3-AS1	FALSE	FALSE	TRUE	TRUE
ERO1A	FALSE	FALSE	FALSE	TRUE
ERO1B	FALSE	FALSE	TRUE	TRUE
ESCO1	FALSE	TRUE	TRUE	FALSE
ESR2	FALSE	FALSE	TRUE	FALSE
ESYT2	FALSE	TRUE	TRUE	TRUE
ETF1	FALSE	TRUE	FALSE	FALSE
ETFA	FALSE	FALSE	TRUE	FALSE
ETFDH	FALSE	TRUE	FALSE	FALSE
ETV1	FALSE	FALSE	TRUE	FALSE
ETV4	FALSE	FALSE	FALSE	TRUE
EVA1C	FALSE	FALSE	TRUE	FALSE
EVI5	FALSE	TRUE	FALSE	FALSE
EVI5L	FALSE	FALSE	TRUE	FALSE
EVL	FALSE	TRUE	FALSE	FALSE
EXD3	FALSE	TRUE	FALSE	TRUE
EXOC1	FALSE	TRUE	FALSE	FALSE
EXOC5	TRUE	TRUE	TRUE	TRUE
EXOC6	FALSE	TRUE	FALSE	FALSE
EXOC7	FALSE	TRUE	FALSE	FALSE
EXOSC1	FALSE	FALSE	TRUE	FALSE
EXT1	FALSE	TRUE	FALSE	TRUE
EXTL3	FALSE	TRUE	FALSE	TRUE
EYA2	FALSE	TRUE	FALSE	TRUE
EYA3	FALSE	TRUE	TRUE	FALSE
EYS	FALSE	TRUE	FALSE	TRUE
EZH1	FALSE	TRUE	FALSE	FALSE
EZH2	FALSE	TRUE	FALSE	TRUE
F10	FALSE	FALSE	FALSE	TRUE
FABP5	FALSE	TRUE	FALSE	FALSE
FADS1	FALSE	TRUE	TRUE	TRUE
FADS2	FALSE	TRUE	TRUE	TRUE
FAF2	FALSE	TRUE	FALSE	FALSE
FAM106A	FALSE	FALSE	TRUE	FALSE
FAM117A	FALSE	TRUE	TRUE	TRUE
FAM117B	FALSE	TRUE	TRUE	FALSE
FAM120A	FALSE	TRUE	FALSE	FALSE
FAM120B	FALSE	TRUE	FALSE	FALSE
FAM124A	FALSE	TRUE	TRUE	TRUE
FAM126B	FALSE	TRUE	FALSE	FALSE
FAM133B	FALSE	TRUE	TRUE	FALSE
FAM13B	TRUE	TRUE	TRUE	TRUE
FAM149B1	FALSE	FALSE	TRUE	TRUE
FAM151B	FALSE	FALSE	TRUE	FALSE
FAM153A	FALSE	FALSE	TRUE	TRUE
FAM153B	FALSE	FALSE	TRUE	TRUE
FAM153CP	FALSE	FALSE	TRUE	TRUE
FAM162A	FALSE	FALSE	TRUE	TRUE
FAM168A	FALSE	TRUE	FALSE	FALSE
FAM168B	FALSE	TRUE	FALSE	FALSE
FAM171A1	FALSE	TRUE	TRUE	TRUE
FAM174B	FALSE	TRUE	FALSE	FALSE
FAM177A1	FALSE	TRUE	FALSE	FALSE
FAM178B	FALSE	FALSE	FALSE	TRUE
FAM182A	FALSE	FALSE	TRUE	FALSE
FAM185A	FALSE	TRUE	TRUE	TRUE
FAM189A1	FALSE	FALSE	TRUE	FALSE
FAM193A	FALSE	TRUE	FALSE	FALSE
FAM193B	FALSE	FALSE	TRUE	FALSE
FAM204A	FALSE	TRUE	TRUE	TRUE
FAM210A	FALSE	TRUE	TRUE	TRUE
FAM214A	FALSE	TRUE	FALSE	TRUE
FAM215B	FALSE	TRUE	FALSE	FALSE
FAM216A	FALSE	FALSE	TRUE	TRUE
FAM222B	FALSE	TRUE	FALSE	TRUE
FAM228B	FALSE	TRUE	TRUE	FALSE
FAM229B	TRUE	TRUE	FALSE	FALSE
FAM27C	FALSE	FALSE	TRUE	FALSE
FAM3C	FALSE	TRUE	FALSE	FALSE
FAM49B	FALSE	TRUE	FALSE	FALSE
FAM50A	FALSE	TRUE	FALSE	FALSE
FAM66C	FALSE	FALSE	TRUE	TRUE
FAM76A	FALSE	FALSE	TRUE	FALSE
FAM78A	FALSE	TRUE	FALSE	FALSE
FAM81B	FALSE	FALSE	FALSE	TRUE
FANCA	FALSE	FALSE	TRUE	TRUE
FANCI	FALSE	FALSE	FALSE	TRUE
FANK1	FALSE	FALSE	TRUE	TRUE
FAR1	FALSE	TRUE	FALSE	FALSE
FAR2	FALSE	FALSE	FALSE	TRUE
FARP2	FALSE	TRUE	TRUE	TRUE
FARS2	FALSE	TRUE	TRUE	TRUE
FARSB	FALSE	FALSE	TRUE	FALSE
FASTK	FALSE	TRUE	FALSE	FALSE
FASTKD2	FALSE	TRUE	FALSE	FALSE
FAT1	FALSE	FALSE	TRUE	TRUE
FAT2	FALSE	FALSE	FALSE	TRUE
FAT3	FALSE	TRUE	FALSE	TRUE
FBF1	FALSE	FALSE	FALSE	TRUE
FBLN7	FALSE	FALSE	TRUE	TRUE
FBN1	FALSE	FALSE	TRUE	FALSE
FBXL13	FALSE	TRUE	TRUE	TRUE
FBXL18	FALSE	TRUE	TRUE	TRUE
FBXL2	FALSE	FALSE	TRUE	FALSE
FBXL20	FALSE	TRUE	FALSE	FALSE
FBXL4	FALSE	FALSE	TRUE	TRUE
FBXO10	FALSE	FALSE	TRUE	FALSE
FBXO11	FALSE	TRUE	FALSE	FALSE
FBXO16	FALSE	FALSE	TRUE	TRUE
FBXO17	FALSE	FALSE	TRUE	TRUE
FBXO21	FALSE	TRUE	FALSE	FALSE
FBXO25	FALSE	TRUE	FALSE	FALSE
FBXO27	FALSE	TRUE	TRUE	TRUE
FBXO28	FALSE	TRUE	FALSE	FALSE
FBXO33	FALSE	TRUE	FALSE	FALSE
FBXO34	FALSE	TRUE	FALSE	TRUE
FBXO36	FALSE	FALSE	FALSE	TRUE
FBXO9	FALSE	TRUE	FALSE	FALSE
FBXW7	TRUE	TRUE	TRUE	FALSE
FCHO2	FALSE	TRUE	TRUE	TRUE
FCHSD2	FALSE	TRUE	FALSE	FALSE
FDFT1	FALSE	TRUE	TRUE	TRUE
FDPS	FALSE	TRUE	TRUE	TRUE
FECH	FALSE	FALSE	FALSE	TRUE
FEZ1	FALSE	FALSE	TRUE	FALSE
FEZ2	TRUE	TRUE	TRUE	TRUE
FGD4	FALSE	TRUE	FALSE	TRUE
FGD5-AS1	FALSE	TRUE	FALSE	FALSE
FGD6	FALSE	FALSE	FALSE	TRUE
FGF1	FALSE	TRUE	FALSE	TRUE
FGF11	FALSE	FALSE	TRUE	TRUE
FGF13	TRUE	TRUE	TRUE	TRUE
FGF14	FALSE	FALSE	TRUE	FALSE
FGF2	FALSE	FALSE	TRUE	FALSE
FHIT	FALSE	FALSE	TRUE	TRUE
FHL1	FALSE	FALSE	TRUE	TRUE
FHOD3	FALSE	FALSE	TRUE	TRUE
FILIP1L	FALSE	TRUE	FALSE	TRUE
FIP1L1	FALSE	TRUE	TRUE	FALSE
FIS1	FALSE	TRUE	FALSE	FALSE
FKBP5	FALSE	FALSE	TRUE	FALSE
FLACC1	FALSE	TRUE	FALSE	TRUE
FLG-AS1	FALSE	FALSE	TRUE	FALSE
FLNB	FALSE	FALSE	TRUE	TRUE
FLRT2	FALSE	FALSE	TRUE	FALSE
FLT1	TRUE	FALSE	TRUE	FALSE
FLYWCH1	FALSE	TRUE	FALSE	FALSE
FMNL3	FALSE	FALSE	TRUE	FALSE
FMR1	FALSE	TRUE	FALSE	FALSE
FMR1NB	FALSE	FALSE	FALSE	TRUE
FN1	FALSE	FALSE	FALSE	TRUE
FN3K	FALSE	TRUE	FALSE	FALSE
FNBP1	FALSE	TRUE	TRUE	TRUE
FNBP1L	FALSE	TRUE	TRUE	TRUE
FNBP4	FALSE	TRUE	FALSE	FALSE
FNIP1	FALSE	TRUE	FALSE	FALSE
FNTB	FALSE	FALSE	FALSE	TRUE
FO393401.1	FALSE	FALSE	FALSE	TRUE
FOS	FALSE	TRUE	FALSE	TRUE
FOSB	FALSE	TRUE	FALSE	FALSE
FOXJ3	FALSE	TRUE	FALSE	FALSE
FOXK1	FALSE	TRUE	TRUE	TRUE
FOXK2	FALSE	TRUE	FALSE	FALSE
FOXO1	FALSE	FALSE	TRUE	TRUE
FOXO3	FALSE	TRUE	FALSE	FALSE
FOXP1	FALSE	FALSE	FALSE	TRUE
FOXP2	FALSE	FALSE	TRUE	TRUE
FPGT	FALSE	FALSE	TRUE	TRUE
FREM2	FALSE	FALSE	FALSE	TRUE
FRG1-DT	FALSE	FALSE	TRUE	FALSE
FRMD3	FALSE	TRUE	FALSE	TRUE
FRMD4A	TRUE	TRUE	FALSE	FALSE
FRMD4B	FALSE	FALSE	TRUE	FALSE
FRRS1L	FALSE	FALSE	TRUE	FALSE
FRS2	FALSE	TRUE	TRUE	TRUE
FSD1L	FALSE	TRUE	FALSE	TRUE
FSIP1	FALSE	FALSE	TRUE	TRUE
FSIP2-AS1	FALSE	FALSE	FALSE	TRUE
FSTL1	FALSE	FALSE	TRUE	FALSE
FUBP3	FALSE	TRUE	FALSE	TRUE
FUCA2	FALSE	FALSE	FALSE	TRUE
FUT10	FALSE	FALSE	TRUE	FALSE
FUT8	FALSE	TRUE	FALSE	TRUE
FUT9	FALSE	FALSE	TRUE	FALSE
FXR2	FALSE	TRUE	FALSE	FALSE
FYCO1	FALSE	TRUE	FALSE	FALSE
G2E3	FALSE	TRUE	TRUE	TRUE
G2E3-AS1	FALSE	FALSE	TRUE	TRUE
G3BP2	FALSE	TRUE	TRUE	FALSE
GAB1	FALSE	FALSE	TRUE	FALSE
GAB2	TRUE	TRUE	TRUE	TRUE
GABBR1	FALSE	FALSE	TRUE	FALSE
GABBR2	FALSE	TRUE	TRUE	TRUE
GABRB2	FALSE	TRUE	FALSE	FALSE
GABRG1	FALSE	FALSE	TRUE	FALSE
GABRR2	FALSE	TRUE	TRUE	TRUE
GACAT2	FALSE	TRUE	TRUE	TRUE
GAD2	FALSE	FALSE	FALSE	TRUE
GALK2	FALSE	TRUE	TRUE	FALSE
GALNT1	FALSE	TRUE	TRUE	FALSE
GALNT13	TRUE	TRUE	TRUE	TRUE
GALNT14	TRUE	TRUE	TRUE	TRUE
GALNT17	FALSE	FALSE	TRUE	FALSE
GALNT18	FALSE	FALSE	FALSE	TRUE
GALNT8	FALSE	FALSE	TRUE	FALSE
GAN	FALSE	TRUE	FALSE	FALSE
GANAB	FALSE	TRUE	FALSE	FALSE
GANC	FALSE	FALSE	FALSE	TRUE
GAPVD1	FALSE	TRUE	FALSE	FALSE
GAREM1	FALSE	TRUE	FALSE	TRUE
GARNL3	FALSE	TRUE	TRUE	TRUE
GARS	FALSE	TRUE	FALSE	TRUE
GART	FALSE	FALSE	FALSE	TRUE
GATAD1	FALSE	TRUE	TRUE	FALSE
GATAD2A	FALSE	TRUE	FALSE	FALSE
GATAD2B	FALSE	TRUE	FALSE	FALSE
GBA2	FALSE	TRUE	FALSE	FALSE
GBF1	FALSE	TRUE	FALSE	FALSE
GCFC2	FALSE	FALSE	TRUE	FALSE
GCLC	FALSE	FALSE	TRUE	FALSE
GCNT2	FALSE	FALSE	FALSE	TRUE
GCSH	FALSE	FALSE	TRUE	FALSE
GDF11	FALSE	TRUE	FALSE	FALSE
GDPD1	FALSE	TRUE	TRUE	TRUE
GDPD5	FALSE	TRUE	FALSE	FALSE
GEM	FALSE	TRUE	TRUE	FALSE
GEMIN5	FALSE	FALSE	TRUE	TRUE
GFM1	FALSE	TRUE	FALSE	FALSE
GFOD2	FALSE	TRUE	FALSE	TRUE
GFPT1	FALSE	FALSE	TRUE	FALSE
GGA2	FALSE	TRUE	FALSE	FALSE
GINM1	FALSE	TRUE	FALSE	TRUE
GIT2	FALSE	TRUE	FALSE	TRUE
GKAP1	FALSE	TRUE	FALSE	FALSE
GLRX	FALSE	TRUE	TRUE	TRUE
GLS	FALSE	TRUE	FALSE	FALSE
GLT1D1	FALSE	FALSE	TRUE	FALSE
GLT8D1	FALSE	TRUE	FALSE	TRUE
GLUL	TRUE	TRUE	TRUE	TRUE
GLYATL2	FALSE	FALSE	TRUE	FALSE
GLYR1	FALSE	TRUE	TRUE	TRUE
GMCL1	FALSE	FALSE	TRUE	FALSE
GNAI3	FALSE	TRUE	FALSE	TRUE
GNAL	FALSE	TRUE	TRUE	TRUE
GNAO1	FALSE	FALSE	TRUE	TRUE
GNAQ	FALSE	TRUE	TRUE	TRUE
GNAZ	FALSE	TRUE	FALSE	FALSE
GNB2	TRUE	TRUE	TRUE	TRUE
GNB3	TRUE	TRUE	FALSE	FALSE
GNG13	FALSE	TRUE	FALSE	FALSE
GNG7	FALSE	FALSE	TRUE	FALSE
GNPAT	FALSE	TRUE	FALSE	FALSE
GNPDA1	FALSE	TRUE	FALSE	FALSE
GNPDA2	TRUE	TRUE	FALSE	FALSE
GNPTAB	FALSE	TRUE	TRUE	TRUE
GNS	FALSE	TRUE	TRUE	TRUE
GOLGA1	FALSE	TRUE	FALSE	FALSE
GOLGA2	FALSE	TRUE	FALSE	FALSE
GOLGB1	FALSE	TRUE	FALSE	FALSE
GOLM1	FALSE	FALSE	TRUE	FALSE
GOLPH3	FALSE	TRUE	FALSE	FALSE
GON4L	FALSE	TRUE	FALSE	FALSE
GORASP2	FALSE	FALSE	TRUE	FALSE
GOT1	FALSE	TRUE	FALSE	TRUE
GP6	FALSE	FALSE	TRUE	TRUE
GPALPP1	FALSE	TRUE	TRUE	FALSE
GPATCH2L	FALSE	TRUE	FALSE	FALSE
GPBP1L1	FALSE	TRUE	FALSE	FALSE
GPC3	TRUE	TRUE	TRUE	TRUE
GPC5	FALSE	TRUE	FALSE	TRUE
GPC5-AS2	FALSE	FALSE	FALSE	TRUE
GPC6	FALSE	TRUE	TRUE	TRUE
GPC6-AS1	FALSE	TRUE	FALSE	TRUE
GPD1L	FALSE	FALSE	FALSE	TRUE
GPI	FALSE	TRUE	FALSE	FALSE
GPLD1	FALSE	TRUE	TRUE	TRUE
GPM6B	FALSE	TRUE	TRUE	TRUE
GPR107	FALSE	FALSE	FALSE	TRUE
GPR137	FALSE	TRUE	FALSE	FALSE
GPR137B	FALSE	TRUE	TRUE	TRUE
GPR158	FALSE	FALSE	TRUE	FALSE
GPR162	FALSE	TRUE	FALSE	FALSE
GPR180	FALSE	TRUE	TRUE	TRUE
GPR19	FALSE	FALSE	TRUE	TRUE
GPR85	FALSE	TRUE	FALSE	TRUE
GPRC5B	FALSE	TRUE	FALSE	FALSE
GPRIN1	FALSE	TRUE	TRUE	TRUE
GPS2	FALSE	TRUE	FALSE	FALSE
GPT2	FALSE	FALSE	FALSE	TRUE
GPX4	FALSE	FALSE	TRUE	FALSE
GRB2	FALSE	TRUE	TRUE	FALSE
GREB1L	FALSE	FALSE	TRUE	FALSE
GRHL1	FALSE	FALSE	FALSE	TRUE
GRID1	TRUE	TRUE	FALSE	FALSE
GRID1-AS1	FALSE	FALSE	TRUE	TRUE
GRIN1	FALSE	FALSE	TRUE	FALSE
GRIN2D	FALSE	FALSE	TRUE	FALSE
GRK3	TRUE	TRUE	TRUE	TRUE
GRK4	TRUE	TRUE	TRUE	TRUE
GRK5	FALSE	FALSE	TRUE	TRUE
GRM5	FALSE	TRUE	TRUE	TRUE
GRM6	TRUE	FALSE	TRUE	TRUE
GRM7	TRUE	TRUE	TRUE	TRUE
GRM8	FALSE	TRUE	FALSE	TRUE
GSN	FALSE	TRUE	FALSE	TRUE
GSPT1	FALSE	TRUE	TRUE	TRUE
GSTCD	FALSE	TRUE	FALSE	TRUE
GSTO2	FALSE	TRUE	TRUE	TRUE
GSTP1	FALSE	FALSE	FALSE	TRUE
GTDC1	FALSE	TRUE	TRUE	TRUE
GTF2B	FALSE	TRUE	FALSE	FALSE
GTF2E2	FALSE	FALSE	TRUE	FALSE
GTF2F2	FALSE	FALSE	TRUE	FALSE
GTF2H1	FALSE	FALSE	TRUE	FALSE
GTF2IRD2	FALSE	FALSE	TRUE	FALSE
GTF3C2	FALSE	TRUE	FALSE	FALSE
GTPBP10	FALSE	TRUE	TRUE	FALSE
GTPBP2	FALSE	FALSE	TRUE	TRUE
GUCA1B	FALSE	FALSE	FALSE	TRUE
GXYLT2	FALSE	TRUE	TRUE	TRUE
GYG1	FALSE	TRUE	FALSE	TRUE
GYS1	FALSE	TRUE	TRUE	TRUE
H2AFY2	FALSE	TRUE	TRUE	FALSE
H2AFZ	FALSE	FALSE	TRUE	FALSE
HABP4	FALSE	TRUE	TRUE	FALSE
HACL1	FALSE	TRUE	TRUE	TRUE
HADHA	FALSE	TRUE	FALSE	FALSE
HADHB	FALSE	TRUE	FALSE	FALSE
HAGHL	FALSE	TRUE	FALSE	FALSE
HAT1	FALSE	TRUE	FALSE	TRUE
HAUS4	FALSE	FALSE	TRUE	TRUE
HAVCR2	FALSE	FALSE	TRUE	TRUE
HBP1	FALSE	TRUE	FALSE	FALSE
HBS1L	FALSE	FALSE	TRUE	FALSE
HCG17	FALSE	TRUE	TRUE	TRUE
HCN1	FALSE	TRUE	FALSE	FALSE
HDAC2	FALSE	FALSE	TRUE	FALSE
HDAC3	FALSE	TRUE	TRUE	FALSE
HDAC4	FALSE	FALSE	TRUE	FALSE
HDAC8	FALSE	TRUE	FALSE	FALSE
HDAC9	TRUE	TRUE	FALSE	FALSE
HDDC2	FALSE	FALSE	TRUE	FALSE
HDHD5	FALSE	FALSE	TRUE	TRUE
HDLBP	FALSE	TRUE	FALSE	TRUE
HEATR3	FALSE	FALSE	TRUE	FALSE
HEATR5B	FALSE	FALSE	TRUE	TRUE
HECTD2	FALSE	TRUE	FALSE	TRUE
HECTD4	FALSE	TRUE	FALSE	FALSE
HECW2	FALSE	TRUE	FALSE	TRUE
HELLS	FALSE	FALSE	TRUE	FALSE
HELZ	FALSE	TRUE	FALSE	FALSE
HERC2	FALSE	TRUE	FALSE	FALSE
HERPUD1	FALSE	FALSE	FALSE	TRUE
HEXA	FALSE	FALSE	FALSE	TRUE
HEXD	FALSE	FALSE	TRUE	FALSE
HFM1	FALSE	TRUE	TRUE	FALSE
HGS	FALSE	TRUE	FALSE	FALSE
HGSNAT	FALSE	TRUE	FALSE	FALSE
HHATL	FALSE	TRUE	TRUE	FALSE
HIBADH	FALSE	TRUE	FALSE	FALSE
HID1	FALSE	TRUE	FALSE	FALSE
HIF1A	FALSE	TRUE	TRUE	TRUE
HIF1A-AS3	FALSE	TRUE	TRUE	TRUE
HILPDA	FALSE	FALSE	TRUE	TRUE
HIPK1	FALSE	TRUE	TRUE	TRUE
HIPK3	FALSE	TRUE	FALSE	FALSE
HIST1H2AC	FALSE	FALSE	TRUE	FALSE
HIST1H2BD	FALSE	TRUE	TRUE	TRUE
HIST1H2BG	FALSE	TRUE	FALSE	TRUE
HIST1H4C	FALSE	TRUE	FALSE	TRUE
HIST3H2A	FALSE	TRUE	FALSE	FALSE
HIVEP1	FALSE	TRUE	FALSE	TRUE
HIVEP3	TRUE	FALSE	TRUE	FALSE
HK2	FALSE	TRUE	FALSE	TRUE
HLA-A	TRUE	FALSE	TRUE	FALSE
HLA-B	FALSE	FALSE	TRUE	FALSE
HLCS	FALSE	FALSE	TRUE	FALSE
HM13	FALSE	TRUE	TRUE	FALSE
HMBOX1	FALSE	TRUE	FALSE	FALSE
HMCES	FALSE	TRUE	TRUE	FALSE
HMG20A	FALSE	TRUE	TRUE	FALSE
HMGCR	FALSE	TRUE	TRUE	TRUE
HMGCS1	FALSE	TRUE	TRUE	TRUE
HMGXB4	FALSE	FALSE	TRUE	FALSE
HMX1	FALSE	FALSE	TRUE	TRUE
HNRNPUL1	FALSE	TRUE	FALSE	FALSE
HOMER1	FALSE	TRUE	FALSE	TRUE
HOOK3	FALSE	TRUE	FALSE	FALSE
HPCAL4	FALSE	TRUE	TRUE	TRUE
HPGD	FALSE	TRUE	FALSE	TRUE
HPRT1	FALSE	FALSE	TRUE	TRUE
HPS4	FALSE	TRUE	FALSE	FALSE
HPS5	FALSE	TRUE	FALSE	FALSE
HS2ST1	FALSE	FALSE	TRUE	FALSE
HS3ST4	TRUE	TRUE	TRUE	TRUE
HS6ST2	FALSE	FALSE	TRUE	FALSE
HSD17B12	FALSE	TRUE	FALSE	FALSE
HSD17B14	FALSE	TRUE	TRUE	TRUE
HSP90B1	FALSE	FALSE	TRUE	TRUE
HSPA1A	FALSE	TRUE	TRUE	TRUE
HSPA1B	FALSE	TRUE	TRUE	TRUE
HSPA4L	FALSE	TRUE	TRUE	TRUE
HSPA5	FALSE	TRUE	FALSE	TRUE
HSPA9	FALSE	FALSE	FALSE	TRUE
HSPB11	FALSE	FALSE	FALSE	TRUE
HSPD1	FALSE	TRUE	FALSE	FALSE
HSPE1	FALSE	TRUE	FALSE	FALSE
HTR1E	FALSE	FALSE	TRUE	FALSE
HTT	FALSE	TRUE	FALSE	FALSE
HTT-AS	FALSE	FALSE	FALSE	TRUE
HULC	FALSE	FALSE	TRUE	TRUE
HUNK	FALSE	TRUE	TRUE	TRUE
HUWE1	FALSE	TRUE	FALSE	FALSE
IARS	FALSE	TRUE	TRUE	TRUE
ICA1	FALSE	FALSE	TRUE	FALSE
ICA1L	FALSE	TRUE	FALSE	FALSE
ICE2	FALSE	FALSE	TRUE	FALSE
ICK	FALSE	TRUE	FALSE	FALSE
IDE	FALSE	TRUE	FALSE	TRUE
IDH1	FALSE	FALSE	TRUE	TRUE
IDI1	FALSE	TRUE	TRUE	TRUE
IDI2-AS1	FALSE	TRUE	FALSE	TRUE
IER2	FALSE	TRUE	FALSE	FALSE
IFI27L2	FALSE	TRUE	FALSE	TRUE
IFIT3	FALSE	FALSE	FALSE	TRUE
IFNAR2	FALSE	FALSE	TRUE	FALSE
IFNGR1	FALSE	TRUE	FALSE	FALSE
IFNGR2	FALSE	TRUE	TRUE	TRUE
IFNLR1	FALSE	FALSE	TRUE	FALSE
IFT122	FALSE	TRUE	TRUE	TRUE
IFT140	FALSE	FALSE	TRUE	TRUE
IFT172	FALSE	TRUE	TRUE	TRUE
IFT22	FALSE	TRUE	FALSE	FALSE
IFT43	FALSE	FALSE	TRUE	TRUE
IFT52	FALSE	TRUE	FALSE	TRUE
IFT57	FALSE	TRUE	FALSE	TRUE
IFT74	FALSE	FALSE	TRUE	TRUE
IFT80	FALSE	FALSE	TRUE	FALSE
IFT81	FALSE	TRUE	TRUE	TRUE
IFT88	FALSE	TRUE	FALSE	FALSE
IGBP1	FALSE	TRUE	FALSE	FALSE
IGDCC3	FALSE	TRUE	TRUE	TRUE
IGDCC4	FALSE	TRUE	TRUE	TRUE
IGF2BP3	FALSE	FALSE	TRUE	TRUE
IGFBP5	FALSE	TRUE	FALSE	TRUE
IGFBP6	FALSE	TRUE	FALSE	FALSE
IGSF11	FALSE	TRUE	TRUE	TRUE
IGSF3	FALSE	FALSE	TRUE	FALSE
IGSF8	FALSE	TRUE	FALSE	FALSE
IK	FALSE	FALSE	TRUE	FALSE
IL10RB	FALSE	FALSE	TRUE	FALSE
IL1RAPL1	TRUE	FALSE	TRUE	FALSE
IL34	FALSE	FALSE	TRUE	TRUE
IL3RA	FALSE	TRUE	FALSE	FALSE
IL6ST	FALSE	TRUE	TRUE	FALSE
IL7	FALSE	FALSE	TRUE	TRUE
ILF2	FALSE	TRUE	FALSE	FALSE
ILF3	FALSE	TRUE	FALSE	FALSE
ILKAP	FALSE	FALSE	TRUE	FALSE
ILRUN	FALSE	TRUE	FALSE	FALSE
IMMP2L	FALSE	TRUE	TRUE	TRUE
IMMT	FALSE	TRUE	FALSE	FALSE
IMPAD1	FALSE	TRUE	FALSE	FALSE
IMPDH1	FALSE	TRUE	TRUE	TRUE
INA	FALSE	TRUE	FALSE	FALSE
ING4	FALSE	TRUE	TRUE	FALSE
INKA2	FALSE	FALSE	FALSE	TRUE
INO80	FALSE	TRUE	FALSE	FALSE
INPP1	FALSE	TRUE	FALSE	TRUE
INPP4A	FALSE	TRUE	FALSE	FALSE
INPP5B	FALSE	TRUE	TRUE	TRUE
INPP5F	FALSE	TRUE	TRUE	FALSE
INSIG1	FALSE	TRUE	FALSE	FALSE
INSIG2	FALSE	FALSE	FALSE	TRUE
INSR	FALSE	TRUE	TRUE	TRUE
INTS12	FALSE	TRUE	FALSE	TRUE
INTS4	FALSE	FALSE	TRUE	TRUE
INTS6	FALSE	TRUE	FALSE	TRUE
INTS6L	TRUE	FALSE	TRUE	TRUE
INTS8	FALSE	FALSE	TRUE	FALSE
IP6K1	FALSE	FALSE	TRUE	FALSE
IPMK	FALSE	TRUE	FALSE	FALSE
IPO7	FALSE	TRUE	FALSE	FALSE
IQCB1	FALSE	FALSE	TRUE	FALSE
IQCK	FALSE	TRUE	FALSE	FALSE
IQGAP2	FALSE	FALSE	FALSE	TRUE
IRAK1BP1	FALSE	TRUE	TRUE	TRUE
IRF2BP2	FALSE	TRUE	TRUE	TRUE
IRF2BPL	FALSE	TRUE	FALSE	FALSE
IRF9	TRUE	TRUE	TRUE	TRUE
IRS1	TRUE	TRUE	TRUE	TRUE
ISCU	FALSE	TRUE	FALSE	FALSE
ISL1	TRUE	FALSE	TRUE	TRUE
IST1	FALSE	TRUE	TRUE	FALSE
ITFG2	FALSE	FALSE	TRUE	FALSE
ITGA1	FALSE	FALSE	TRUE	TRUE
ITGA3	FALSE	FALSE	TRUE	FALSE
ITGA7	FALSE	FALSE	FALSE	TRUE
ITGA8	TRUE	TRUE	TRUE	TRUE
ITGA9	FALSE	TRUE	TRUE	TRUE
ITGA9-AS1	FALSE	TRUE	TRUE	TRUE
ITGB1BP1	FALSE	TRUE	FALSE	FALSE
ITGB3BP	FALSE	FALSE	TRUE	TRUE
ITPK1	FALSE	TRUE	FALSE	TRUE
ITPR1	FALSE	TRUE	FALSE	TRUE
ITSN1	FALSE	TRUE	FALSE	FALSE
IVD	FALSE	FALSE	TRUE	TRUE
IWS1	FALSE	TRUE	FALSE	FALSE
JADE1	FALSE	TRUE	TRUE	TRUE
JAK2	FALSE	FALSE	TRUE	FALSE
JAKMIP2	FALSE	TRUE	FALSE	FALSE
JAKMIP3	FALSE	FALSE	TRUE	FALSE
JAM3	FALSE	TRUE	FALSE	FALSE
JDP2	FALSE	TRUE	FALSE	FALSE
JMY	FALSE	TRUE	FALSE	FALSE
JPH3	FALSE	FALSE	TRUE	FALSE
JPH4	TRUE	TRUE	TRUE	TRUE
JUNB	FALSE	TRUE	FALSE	TRUE
KALRN	FALSE	TRUE	FALSE	FALSE
KANTR	FALSE	TRUE	FALSE	FALSE
KAT2B	FALSE	TRUE	FALSE	TRUE
KAT6A	FALSE	TRUE	FALSE	FALSE
KAT6B	FALSE	TRUE	TRUE	TRUE
KAT7	FALSE	TRUE	FALSE	FALSE
KATNAL1	FALSE	FALSE	TRUE	TRUE
KATNAL2	FALSE	TRUE	TRUE	TRUE
KAZN	FALSE	FALSE	TRUE	FALSE
KAZN-AS1	FALSE	FALSE	TRUE	FALSE
KBTBD12	FALSE	FALSE	FALSE	TRUE
KBTBD7	FALSE	TRUE	FALSE	FALSE
KCMF1	FALSE	TRUE	FALSE	FALSE
KCNA1	FALSE	TRUE	FALSE	FALSE
KCNAB1	FALSE	TRUE	FALSE	FALSE
KCNAB3	FALSE	TRUE	TRUE	TRUE
KCNB1	TRUE	TRUE	FALSE	FALSE
KCNB2	FALSE	FALSE	TRUE	FALSE
KCNC1	FALSE	FALSE	TRUE	FALSE
KCND3	FALSE	TRUE	TRUE	TRUE
KCNG4	FALSE	TRUE	FALSE	TRUE
KCNH1	FALSE	FALSE	TRUE	FALSE
KCNH5	FALSE	FALSE	FALSE	TRUE
KCNIP2-AS1	FALSE	TRUE	TRUE	TRUE
KCNIP4	TRUE	TRUE	TRUE	TRUE
KCNIP4-IT1	FALSE	TRUE	TRUE	TRUE
KCNJ6	TRUE	FALSE	TRUE	FALSE
KCNMA1-AS1	FALSE	TRUE	FALSE	FALSE
KCNMB2-AS1	FALSE	TRUE	FALSE	FALSE
KCNN2	FALSE	FALSE	TRUE	FALSE
KCNQ2	FALSE	FALSE	TRUE	FALSE
KCNV1	FALSE	FALSE	TRUE	FALSE
KCTD1	FALSE	FALSE	TRUE	FALSE
KCTD13	FALSE	FALSE	TRUE	FALSE
KCTD16	FALSE	TRUE	FALSE	TRUE
KCTD2	FALSE	TRUE	FALSE	TRUE
KCTD20	FALSE	FALSE	TRUE	FALSE
KCTD3	TRUE	FALSE	FALSE	FALSE
KCTD6	FALSE	FALSE	TRUE	FALSE
KCTD7	FALSE	TRUE	FALSE	FALSE
KCTD8	FALSE	FALSE	FALSE	TRUE
KDM1A	TRUE	FALSE	TRUE	FALSE
KDM1B	FALSE	FALSE	TRUE	FALSE
KDM2B	FALSE	TRUE	FALSE	TRUE
KDM2B-DT	FALSE	FALSE	FALSE	TRUE
KDM3A	FALSE	TRUE	TRUE	TRUE
KDM3B	FALSE	TRUE	FALSE	FALSE
KDM4A	FALSE	TRUE	FALSE	FALSE
KDM4A-AS1	FALSE	FALSE	TRUE	TRUE
KDM7A	FALSE	TRUE	FALSE	FALSE
KDSR	FALSE	TRUE	TRUE	TRUE
KHDC1	FALSE	FALSE	TRUE	FALSE
KHDC4	FALSE	TRUE	FALSE	FALSE
KHDRBS1	FALSE	FALSE	TRUE	TRUE
KHDRBS2	FALSE	TRUE	FALSE	TRUE
KHDRBS2-OT	FALSE	TRUE	FALSE	TRUE
KIAA0232	FALSE	TRUE	FALSE	FALSE
KIAA0586	FALSE	TRUE	FALSE	FALSE
KIAA0825	TRUE	TRUE	TRUE	TRUE
KIAA0895	FALSE	FALSE	FALSE	TRUE
KIAA1211	FALSE	TRUE	FALSE	FALSE
KIAA1217	TRUE	TRUE	TRUE	TRUE
KIAA1257	FALSE	FALSE	FALSE	TRUE
KIAA1324	FALSE	TRUE	TRUE	TRUE
KIAA1614	TRUE	TRUE	TRUE	TRUE
KIAA1958	FALSE	TRUE	FALSE	FALSE
KIAA2026	FALSE	TRUE	FALSE	FALSE
KIF13A	TRUE	TRUE	TRUE	TRUE
KIF13B	FALSE	FALSE	FALSE	TRUE
KIF16B	FALSE	TRUE	FALSE	FALSE
KIF21B	FALSE	TRUE	FALSE	FALSE
KIF22	FALSE	TRUE	FALSE	FALSE
KIF26B	FALSE	FALSE	FALSE	TRUE
KIF27	FALSE	FALSE	TRUE	TRUE
KIF2A	FALSE	TRUE	FALSE	FALSE
KIF3A	FALSE	TRUE	FALSE	FALSE
KIF4A	FALSE	FALSE	FALSE	TRUE
KIF9-AS1	FALSE	TRUE	FALSE	TRUE
KIZ	FALSE	TRUE	FALSE	FALSE
KLC4	FALSE	TRUE	TRUE	FALSE
KLF10	FALSE	TRUE	FALSE	FALSE
KLF12	TRUE	TRUE	TRUE	TRUE
KLF3	FALSE	FALSE	TRUE	TRUE
KLF3-AS1	FALSE	TRUE	TRUE	TRUE
KLF6	FALSE	TRUE	FALSE	FALSE
KLHDC1	FALSE	TRUE	TRUE	TRUE
KLHDC3	FALSE	TRUE	FALSE	FALSE
KLHDC8A	FALSE	TRUE	FALSE	TRUE
KLHL11	FALSE	TRUE	FALSE	FALSE
KLHL2	TRUE	FALSE	TRUE	FALSE
KLHL22	FALSE	TRUE	TRUE	FALSE
KLHL24	FALSE	TRUE	FALSE	FALSE
KLHL29	FALSE	TRUE	TRUE	TRUE
KLHL3	TRUE	FALSE	TRUE	TRUE
KLHL32	FALSE	FALSE	FALSE	TRUE
KLHL8	FALSE	FALSE	TRUE	FALSE
KMT5B	FALSE	TRUE	FALSE	FALSE
KNDC1	FALSE	FALSE	TRUE	TRUE
KPNA1	FALSE	TRUE	FALSE	FALSE
[truncated: 2,279 more rows]
