# Supplementary material for: Integrated multi-omics single cell atlas of the human retina
Source: Research Square preprint supplement (doi:10.21203/rs.3.rs-3471275/v1), 2023-11-16
Supplement: Supplementary file 2 [file 36e918690532a2cffa83ff13.xlsx]

## Sheet: Table S2
Table S2. Metadata information of sc/snRNA-seq samples
institute	study_PI	sampleid	dataset_name	donor	tissue	race	gender	age	disociation	library_platform	strand_sequence	sequencing_platform	cell_enrichment	reference_genome_build	reference_genome	reads_processing
Baylor College of Medicine	Rui Chen	Chen_a_10x3_Lobe_19_D003_NeuN	Chen_a	Chen_19_D003	lobe	Caucasian	Male	86	single nuclei	10x-3'-v3	3'	Illumina Novaseq 6000	NeuN	GRCh38	cellranger/GRCh38-2020-A	cellranger-7.0.1
Baylor College of Medicine	Rui Chen	Chen_a_10x3_Lobe_19_D003_Nu	Chen_a	Chen_19_D003	lobe	Caucasian	Male	86	single nuclei	10x-3'-v3	3'	Illumina Novaseq 6000	None	GRCh38	cellranger/GRCh38-2020-A	cellranger-7.0.1
Baylor College of Medicine	Rui Chen	Chen_a_10x3_Lobe_19_D005_NeuN	Chen_a	Chen_19_D005	lobe	Hispanic	Male	53	single nuclei	10x-3'-v3	3'	Illumina Novaseq 6000	NeuN	GRCh38	cellranger/GRCh38-2020-A	cellranger-7.0.1
Baylor College of Medicine	Rui Chen	Chen_a_10x3_Lobe_19_D005_Nu	Chen_a	Chen_19_D005	lobe	Hispanic	Male	53	single nuclei	10x-3'-v3	3'	Illumina Novaseq 6000	None	GRCh38	cellranger/GRCh38-2020-A	cellranger-7.0.1
Baylor College of Medicine	Rui Chen	Chen_a_10x3_Lobe_19_D006_NeuN	Chen_a	Chen_19_D006	lobe	Caucasian	Male	90	single nuclei	10x-3'-v3	3'	Illumina Novaseq 6000	NeuN	GRCh38	cellranger/GRCh38-2020-A	cellranger-7.0.1
Baylor College of Medicine	Rui Chen	Chen_a_10x3_Lobe_19_D006_Nu	Chen_a	Chen_19_D006	lobe	Caucasian	Male	90	single nuclei	10x-3'-v3	3'	Illumina Novaseq 6000	None	GRCh38	cellranger/GRCh38-2020-A	cellranger-7.0.1
Baylor College of Medicine	Rui Chen	Chen_a_10x3_Lobe_19_D007_NeuN	Chen_a	Chen_19_D007	lobe	Caucasian	Male	66	single nuclei	10x-3'-v3	3'	Illumina Novaseq 6000	NeuN	GRCh38	cellranger/GRCh38-2020-A	cellranger-7.0.1
Baylor College of Medicine	Rui Chen	Chen_a_10x3_Lobe_19_D007_Nu	Chen_a	Chen_19_D007	lobe	Caucasian	Male	66	single nuclei	10x-3'-v3	3'	Illumina Novaseq 6000	None	GRCh38	cellranger/GRCh38-2020-A	cellranger-7.0.1
Baylor College of Medicine	Rui Chen	Chen_a_10x3_Lobe_19_D008_NeuN	Chen_a	Chen_19_D008	lobe	Hispanic	Female	64	single nuclei	10x-3'-v3	3'	Illumina Novaseq 6000	NeuN	GRCh38	cellranger/GRCh38-2020-A	cellranger-7.0.1
Baylor College of Medicine	Rui Chen	Chen_a_10x3_Lobe_19_D008_Nu	Chen_a	Chen_19_D008	lobe	Hispanic	Female	64	single nuclei	10x-3'-v3	3'	Illumina Novaseq 6000	None	GRCh38	cellranger/GRCh38-2020-A	cellranger-7.0.1
Baylor College of Medicine	Rui Chen	Chen_a_10x3_Lobe_19_D009_NeuN	Chen_a	Chen_19_D009	lobe	Hispanic	Male	68	single nuclei	10x-3'-v3	3'	Illumina Novaseq 6000	NeuN	GRCh38	cellranger/GRCh38-2020-A	cellranger-7.0.1
Baylor College of Medicine	Rui Chen	Chen_a_10x3_Lobe_19_D009_Nu	Chen_a	Chen_19_D009	lobe	Hispanic	Male	68	single nuclei	10x-3'-v3	3'	Illumina Novaseq 6000	None	GRCh38	cellranger/GRCh38-2020-A	cellranger-7.0.1
Baylor College of Medicine	Rui Chen	Chen_a_10x3_Lobe_19_D010_NeuN	Chen_a	Chen_19_D010	lobe	Caucasian	Female	88	single nuclei	10x-3'-v3	3'	Illumina Novaseq 6000	NeuN	GRCh38	cellranger/GRCh38-2020-A	cellranger-7.0.1
Baylor College of Medicine	Rui Chen	Chen_a_10x3_Lobe_19_D010_Nu	Chen_a	Chen_19_D010	lobe	Caucasian	Female	88	single nuclei	10x-3'-v3	3'	Illumina Novaseq 6000	None	GRCh38	cellranger/GRCh38-2020-A	cellranger-7.0.1
Baylor College of Medicine	Rui Chen	Chen_a_10x3_Lobe_19_D011_NeuN	Chen_a	Chen_19_D011	lobe	Caucasian	Female	90	single nuclei	10x-3'-v3	3'	Illumina Novaseq 6000	NeuN	GRCh38	cellranger/GRCh38-2020-A	cellranger-7.0.1
Baylor College of Medicine	Rui Chen	Chen_a_10x3_Lobe_19_D011_Nu	Chen_a	Chen_19_D011	lobe	Caucasian	Female	90	single nuclei	10x-3'-v3	3'	Illumina Novaseq 6000	None	GRCh38	cellranger/GRCh38-2020-A	cellranger-7.0.1
Baylor College of Medicine	Rui Chen	Chen_a_10x3_Lobe_19_D019_NeuN	Chen_a	Chen_19_D019	lobe	Caucasian	Female	82	single nuclei	10x-3'-v3	3'	Illumina Novaseq 6000	NeuN	GRCh38	cellranger/GRCh38-2020-A	cellranger-7.0.1
Baylor College of Medicine	Rui Chen	Chen_a_10x3_Lobe_19_D019_Nu	Chen_a	Chen_19_D019	lobe	Caucasian	Female	82	single nuclei	10x-3'-v3	3'	Illumina Novaseq 6000	None	GRCh38	cellranger/GRCh38-2020-A	cellranger-7.0.1
Baylor College of Medicine	Rui Chen	Chen_a_10x3_Lobe_D005_13_NeuN	Chen_a	Chen_D005_13	lobe	Caucasian	Male	80	single nuclei	10x-3'-v3	3'	Illumina Novaseq 6000	NeuN	GRCh38	cellranger/GRCh38-2020-A	cellranger-7.0.1
Baylor College of Medicine	Rui Chen	Chen_a_10x3_Lobe_D005_13_Nu	Chen_a	Chen_D005_13	lobe	Caucasian	Male	80	single nuclei	10x-3'-v3	3'	Illumina Novaseq 6000	None	GRCh38	cellranger/GRCh38-2020-A	cellranger-7.0.1
Baylor College of Medicine	Rui Chen	Chen_a_10x3_Lobe_D009_13_NeuN	Chen_a	Chen_D009_13	lobe	Asian	Male	85	single nuclei	10x-3'-v3	3'	Illumina Novaseq 6000	NeuN	GRCh38	cellranger/GRCh38-2020-A	cellranger-7.0.1
Baylor College of Medicine	Rui Chen	Chen_a_10x3_Lobe_D009_13_Nu	Chen_a	Chen_D009_13	lobe	Asian	Male	85	single nuclei	10x-3'-v3	3'	Illumina Novaseq 6000	None	GRCh38	cellranger/GRCh38-2020-A	cellranger-7.0.1
Baylor College of Medicine	Rui Chen	Chen_a_10x3_Lobe_D013_13_NeuN	Chen_a	Chen_D013_13	lobe	Caucasian	Male	69	single nuclei	10x-3'-v3	3'	Illumina Novaseq 6000	NeuN	GRCh38	cellranger/GRCh38-2020-A	cellranger-7.0.1
Baylor College of Medicine	Rui Chen	Chen_a_10x3_Lobe_D013_13_Nu	Chen_a	Chen_D013_13	lobe	Caucasian	Male	69	single nuclei	10x-3'-v3	3'	Illumina Novaseq 6000	None	GRCh38	cellranger/GRCh38-2020-A	cellranger-7.0.1
Baylor College of Medicine	Rui Chen	Chen_a_10x_Lobe_D017_18_13_NeuN	Chen_a	Chen_mix_D017_13_D018_13	lobe	Caucasian	Male_Female	65_91	single nuclei	10x-3'-v3	3'	Illumina Novaseq 6000	NeuN	GRCh38	cellranger/GRCh38-2020-A	cellranger-7.0.1
Baylor College of Medicine	Rui Chen	Chen_a_10x_Lobe_D017_18_13_Nu	Chen_a	Chen_mix_D017_13_D018_13	lobe	Caucasian	Male_Female	65_91	single nuclei	10x-3'-v3	3'	Illumina Novaseq 6000	None	GRCh38	cellranger/GRCh38-2020-A	cellranger-7.0.1
Baylor College of Medicine	Rui Chen	Chen_a_10x_Lobe_D018_26_13_NeuN	Chen_a	Chen_mix_D018_13_D026_13	lobe	Caucasian	Male_Female	91_81	single nuclei	10x-3'-v3	3'	Illumina Novaseq 6000	NeuN	GRCh38	cellranger/GRCh38-2020-A	cellranger-7.0.1
Baylor College of Medicine	Rui Chen	Chen_a_10x_Lobe_D018_26_13_Nu	Chen_a	Chen_mix_D018_13_D026_13	lobe	Caucasian	Male_Female	91_81	single nuclei	10x-3'-v3	3'	Illumina Novaseq 6000	None	GRCh38	cellranger/GRCh38-2020-A	cellranger-7.0.1
Baylor College of Medicine	Rui Chen	Chen_a_10x_Lobe_D026_13_NeuN	Chen_a	Chen_D026_13	lobe	Caucasian	Male	81	single nuclei	10x-3'-v3	3'	Illumina Novaseq 6000	NeuN	GRCh38	cellranger/GRCh38-2020-A	cellranger-7.0.1
Baylor College of Medicine	Rui Chen	Chen_a_10x_Lobe_D026_13_Nu	Chen_a	Chen_D026_13	lobe	Caucasian	Male	81	single nuclei	10x-3'-v3	3'	Illumina Novaseq 6000	None	GRCh38	cellranger/GRCh38-2020-A	cellranger-7.0.1
Baylor College of Medicine	Rui Chen	Chen_a_10x_Lobe_D19_13_NeuN	Chen_a	Chen_D19_13	lobe	Caucasian	Male	82	single nuclei	10x-3'-v3	3'	Illumina Novaseq 6000	NeuN	GRCh38	cellranger/GRCh38-2020-A	cellranger-7.0.1
Baylor College of Medicine	Rui Chen	Chen_a_10x_Lobe_D19_13_Nu	Chen_a	Chen_D19_13	lobe	Caucasian	Male	82	single nuclei	10x-3'-v3	3'	Illumina Novaseq 6000	None	GRCh38	cellranger/GRCh38-2020-A	cellranger-7.0.1
Baylor College of Medicine	Rui Chen	Chen_a_10x_Lobe_D21_13_NeuN	Chen_a	Chen_D21_13	lobe	Caucasian	Male	86	single nuclei	10x-3'-v3	3'	Illumina Novaseq 6000	NeuN	GRCh38	cellranger/GRCh38-2020-A	cellranger-7.0.1
Baylor College of Medicine	Rui Chen	Chen_a_10x_Lobe_D21_13_Nu	Chen_a	Chen_D21_13	lobe	Caucasian	Male	86	single nuclei	10x-3'-v3	3'	Illumina Novaseq 6000	None	GRCh38	cellranger/GRCh38-2020-A	cellranger-7.0.1
Baylor College of Medicine	Rui Chen	Chen_a_10x_Lobe_D27_13_NeuN	Chen_a	Chen_D27_13	lobe	Caucasian	Male	77	single nuclei	10x-3'-v3	3'	Illumina Novaseq 6000	NeuN	GRCh38	cellranger/GRCh38-2020-A	cellranger-7.0.1
Baylor College of Medicine	Rui Chen	Chen_a_10x_Lobe_D27_13_Nu	Chen_a	Chen_D27_13	lobe	Caucasian	Male	77	single nuclei	10x-3'-v3	3'	Illumina Novaseq 6000	None	GRCh38	cellranger/GRCh38-2020-A	cellranger-7.0.1
Baylor College of Medicine	Rui Chen	Chen_a_10x_Lobe_D28_13_NeuN	Chen_a	Chen_D28_13	lobe	Caucasian	Male	67	single nuclei	10x-3'-v3	3'	Illumina Novaseq 6000	NeuN	GRCh38	cellranger/GRCh38-2020-A	cellranger-7.0.1
Baylor College of Medicine	Rui Chen	Chen_a_10x_Lobe_D28_13_Nu	Chen_a	Chen_D28_13	lobe	Caucasian	Male	67	single nuclei	10x-3'-v3	3'	Illumina Novaseq 6000	None	GRCh38	cellranger/GRCh38-2020-A	cellranger-7.0.1
Baylor College of Medicine	Rui Chen	Chen_a_10x_Lobe_D30_13_NeuN	Chen_a	Chen_D30_13	lobe	Caucasian	Female	73	single nuclei	10x-3'-v3	3'	Illumina Novaseq 6000	NeuN	GRCh38	cellranger/GRCh38-2020-A	cellranger-7.0.1
Baylor College of Medicine	Rui Chen	Chen_a_10x_Lobe_D30_13_Nu	Chen_a	Chen_D30_13	lobe	Caucasian	Female	73	single nuclei	10x-3'-v3	3'	Illumina Novaseq 6000	None	GRCh38	cellranger/GRCh38-2020-A	cellranger-7.0.1
Baylor College of Medicine	Rui Chen	Chen_b_17D013_lobe_NeuNT	Chen_b	Chen_17D013	lobe	Caucasian	Male	65	single nuclei	10x-3'-v3	3'	Illumina Novaseq 6000	NeuN	GRCh38	cellranger/GRCh38-2020-A	cellranger-7.0.1
Baylor College of Medicine	Rui Chen	Chen_b_19D013_fovea	Chen_b	Chen_19D013	fovea	Caucasian	Female	78	single nuclei	10x-3'-v3	3'	Illumina Novaseq 6000	None	GRCh38	cellranger/GRCh38-2020-A	cellranger-7.0.1
Baylor College of Medicine	Rui Chen	Chen_b_19D013_lobe_NeuNT	Chen_b	Chen_19D013	lobe	Caucasian	Female	78	single nuclei	10x-3'-v3	3'	Illumina Novaseq 6000	NeuN	GRCh38	cellranger/GRCh38-2020-A	cellranger-7.0.1
Baylor College of Medicine	Rui Chen	Chen_b_19D013_macular	Chen_b	Chen_19D013	macular	Caucasian	Female	78	single nuclei	10x-3'-v3	3'	Illumina Novaseq 6000	None	GRCh38	cellranger/GRCh38-2020-A	cellranger-7.0.1
Baylor College of Medicine	Rui Chen	Chen_b_19D014_fovea	Chen_b	Chen_19D014	fovea	Caucasian	Male	84	single nuclei	10x-3'-v3	3'	Illumina Novaseq 6000	None	GRCh38	cellranger/GRCh38-2020-A	cellranger-7.0.1
Baylor College of Medicine	Rui Chen	Chen_b_19D014_lobe_NeuNT	Chen_b	Chen_19D014	lobe	Caucasian	Male	84	single nuclei	10x-3'-v3	3'	Illumina Novaseq 6000	NeuN	GRCh38	cellranger/GRCh38-2020-A	cellranger-7.0.1
Baylor College of Medicine	Rui Chen	Chen_b_19D014_macular	Chen_b	Chen_19D014	macular	Caucasian	Male	84	single nuclei	10x-3'-v3	3'	Illumina Novaseq 6000	None	GRCh38	cellranger/GRCh38-2020-A	cellranger-7.0.1
Baylor College of Medicine	Rui Chen	Chen_b_19D015_fovea	Chen_b	Chen_19D015	fovea	Hispanic	Male	73	single nuclei	10x-3'-v3	3'	Illumina Novaseq 6000	None	GRCh38	cellranger/GRCh38-2020-A	cellranger-7.0.1
Baylor College of Medicine	Rui Chen	Chen_b_19D015_lobe_NeuNM	Chen_b	Chen_19D015	lobe	Hispanic	Male	73	single nuclei	10x-3'-v3	3'	Illumina Novaseq 6000	NeuN	GRCh38	cellranger/GRCh38-2020-A	cellranger-7.0.1
Baylor College of Medicine	Rui Chen	Chen_b_19D015_lobe_NeuNT	Chen_b	Chen_19D015	lobe	Hispanic	Male	73	single nuclei	10x-3'-v3	3'	Illumina Novaseq 6000	NeuN	GRCh38	cellranger/GRCh38-2020-A	cellranger-7.0.1
Baylor College of Medicine	Rui Chen	Chen_b_19D015_lobe_Nu	Chen_b	Chen_19D015	lobe	Hispanic	Male	73	single nuclei	10x-3'-v3	3'	Illumina Novaseq 6000	None	GRCh38	cellranger/GRCh38-2020-A	cellranger-7.0.1
Baylor College of Medicine	Rui Chen	Chen_b_19D015_macular	Chen_b	Chen_19D015	macular	Hispanic	Male	73	single nuclei	10x-3'-v3	3'	Illumina Novaseq 6000	None	GRCh38	cellranger/GRCh38-2020-A	cellranger-7.0.1
Baylor College of Medicine	Rui Chen	Chen_b_19D016_macular	Chen_b	Chen_19D016	macular	Caucasian	Male	83	single nuclei	10x-3'-v3	3'	Illumina Novaseq 6000	None	GRCh38	cellranger/GRCh38-2020-A	cellranger-7.0.1
Baylor College of Medicine	Rui Chen	Chen_b_D001-12_lobe_NeuNM	Chen_b	Chen_D001-12	lobe	Caucasian	Female	78	single nuclei	10x-3'-v3	3'	Illumina Novaseq 6000	NeuN	GRCh38	cellranger/GRCh38-2020-A	cellranger-7.0.1
Baylor College of Medicine	Rui Chen	Chen_b_D001-12_lobe_NeuNT	Chen_b	Chen_D001-12	lobe	Caucasian	Female	78	single nuclei	10x-3'-v3	3'	Illumina Novaseq 6000	NeuN	GRCh38	cellranger/GRCh38-2020-A	cellranger-7.0.1
Baylor College of Medicine	Rui Chen	Chen_c_10x3_19_D003	Chen_c	Chen_19_D003	macular	Caucasian	Male	86	single nuclei	10x-3'-v3	3'	Illumina Novaseq 6000	None	GRCh38	cellranger/GRCh38-2020-A	cellranger-7.0.1
Baylor College of Medicine	Rui Chen	Chen_c_10x3_19_D005	Chen_c	Chen_19_D005	macular	Hispanic	Male	53	single nuclei	10x-3'-v3	3'	Illumina Novaseq 6000	None	GRCh38	cellranger/GRCh38-2020-A	cellranger-7.0.1
Baylor College of Medicine	Rui Chen	Chen_c_10x3_19_D006	Chen_c	Chen_19_D006	macular	Caucasian	Male	90	single nuclei	10x-3'-v3	3'	Illumina Novaseq 6000	None	GRCh38	cellranger/GRCh38-2020-A	cellranger-7.0.1
Baylor College of Medicine	Rui Chen	Chen_c_10x3_19_D007	Chen_c	Chen_19_D007	macular	Caucasian	Male	66	single nuclei	10x-3'-v3	3'	Illumina Novaseq 6000	None	GRCh38	cellranger/GRCh38-2020-A	cellranger-7.0.1
Baylor College of Medicine	Rui Chen	Chen_c_10x3_19_D008	Chen_c	Chen_19_D008	macular	Hispanic	Female	64	single nuclei	10x-3'-v3	3'	Illumina Novaseq 6000	None	GRCh38	cellranger/GRCh38-2020-A	cellranger-7.0.1
Baylor College of Medicine	Rui Chen	Chen_c_10x3_19_D009	Chen_c	Chen_19_D009	macular	Hispanic	Male	68	single nuclei	10x-3'-v3	3'	Illumina Novaseq 6000	None	GRCh38	cellranger/GRCh38-2020-A	cellranger-7.0.1
Baylor College of Medicine	Rui Chen	Chen_c_10x3_19_D010	Chen_c	Chen_19_D010	macular	Caucasian	Female	88	single nuclei	10x-3'-v3	3'	Illumina Novaseq 6000	None	GRCh38	cellranger/GRCh38-2020-A	cellranger-7.0.1
Baylor College of Medicine	Rui Chen	Chen_c_10x3_19_D011	Chen_c	Chen_19_D011	macular	Caucasian	Female	90	single nuclei	10x-3'-v3	3'	Illumina Novaseq 6000	None	GRCh38	cellranger/GRCh38-2020-A	cellranger-7.0.1
Baylor College of Medicine	Rui Chen	Chen_c_10x3_19_D019	Chen_c	Chen_19_D019	macular	Caucasian	Female	82	single nuclei	10x-3'-v3	3'	Illumina Novaseq 6000	None	GRCh38	cellranger/GRCh38-2020-A	cellranger-7.0.1
Baylor College of Medicine	Rui Chen	Chen_c_10x3_D005_13	Chen_c	Chen_D005_13	macular	Caucasian	Male	80	single nuclei	10x-3'-v3	3'	Illumina Novaseq 6000	None	GRCh38	cellranger/GRCh38-2020-A	cellranger-7.0.1
Baylor College of Medicine	Rui Chen	Chen_c_10x3_D009_13	Chen_c	Chen_D009_13	macular	Asian	Male	85	single nuclei	10x-3'-v3	3'	Illumina Novaseq 6000	None	GRCh38	cellranger/GRCh38-2020-A	cellranger-7.0.1
Baylor College of Medicine	Rui Chen	Chen_c_10x3_D013_13	Chen_c	Chen_D013_13	macular	Caucasian	Male	69	single nuclei	10x-3'-v3	3'	Illumina Novaseq 6000	None	GRCh38	cellranger/GRCh38-2020-A	cellranger-7.0.1
Baylor College of Medicine	Rui Chen	Chen_c_10x3_D017_13	Chen_c	Chen_D017_13	macular	Caucasian	Male	65	single nuclei	10x-3'-v3	3'	Illumina Novaseq 6000	None	GRCh38	cellranger/GRCh38-2020-A	cellranger-7.0.1
Baylor College of Medicine	Rui Chen	Chen_c_10x3_D018_13	Chen_c	Chen_D018_13	macular	Caucasian	Female	91	single nuclei	10x-3'-v3	3'	Illumina Novaseq 6000	None	GRCh38	cellranger/GRCh38-2020-A	cellranger-7.0.1
Baylor College of Medicine	Rui Chen	Chen_c_10x3_D019_13	Chen_c	Chen_D19_13	macular	Caucasian	Male	82	single nuclei	10x-3'-v3	3'	Illumina Novaseq 6000	None	GRCh38	cellranger/GRCh38-2020-A	cellranger-7.0.1
Baylor College of Medicine	Rui Chen	Chen_c_10x3_D021_13	Chen_c	Chen_D21_13	macular	Caucasian	Male	86	single nuclei	10x-3'-v3	3'	Illumina Novaseq 6000	None	GRCh38	cellranger/GRCh38-2020-A	cellranger-7.0.1
Baylor College of Medicine	Rui Chen	Chen_c_10x3_D026_13	Chen_c	Chen_D026_13	macular	Caucasian	Male	81	single nuclei	10x-3'-v3	3'	Illumina Novaseq 6000	None	GRCh38	cellranger/GRCh38-2020-A	cellranger-7.0.1
Baylor College of Medicine	Rui Chen	Chen_c_10x3_D027_13	Chen_c	Chen_D27_13	macular	Caucasian	Male	77	single nuclei	10x-3'-v3	3'	Illumina Novaseq 6000	None	GRCh38	cellranger/GRCh38-2020-A	cellranger-7.0.1
Baylor College of Medicine	Rui Chen	Chen_c_10x3_D028_13	Chen_c	Chen_D28_13	macular	Caucasian	Male	67	single nuclei	10x-3'-v3	3'	Illumina Novaseq 6000	None	GRCh38	cellranger/GRCh38-2020-A	cellranger-7.0.1
Baylor College of Medicine	Rui Chen	Chen_c_10x3_D030_13_Macular	Chen_c	Chen_D30_13	macular	Caucasian	Female	73	single nuclei	10x-3'-v3	3'	Illumina Novaseq 6000	None	GRCh38	cellranger/GRCh38-2020-A	cellranger-7.0.1
Baylor College of Medicine	Rui Chen	Chen_rgc_10x3V31_19_D007_Macular_NeuN_T	Chen_rgc	Chen_19_D007	macular	Caucasian	Male	66	single nuclei	10x-3'-v3	3'	Illumina Novaseq 6000	NeuN	GRCh38	cellranger/GRCh38-2020-A	cellranger-7.0.1
Baylor College of Medicine	Rui Chen	Chen_rgc_10x3V31_19_D016_Macular_NeuN_T	Chen_rgc	Chen_19_D016	macular	Caucasian	Male	83	single nuclei	10x-3'-v3	3'	Illumina Novaseq 6000	NeuN	GRCh38	cellranger/GRCh38-2020-A	cellranger-7.0.1
Baylor College of Medicine	Rui Chen	Chen_rgc_10x3V31_19_D017_Macular_NeuN_T	Chen_rgc	Chen_19_D017	macular	Caucasian	Male	71	single nuclei	10x-3'-v3	3'	Illumina Novaseq 6000	NeuN	GRCh38	cellranger/GRCh38-2020-A	cellranger-7.0.1
Baylor College of Medicine	Rui Chen	Chen_rgc_10x3v31_19_D005_Macular_NeuN_T	Chen_rgc	Chen_19_D005	macular	Hispanic	Male	53	single nuclei	10x-3'-v3	3'	Illumina Novaseq 6000	NeuN	GRCh38	cellranger/GRCh38-2020-A	cellranger-7.0.1
Baylor College of Medicine	Rui Chen	Chen_rgc_10x3v31_19_D008_Mac_NeuN_T	Chen_rgc	Chen_19_D008	macular	Hispanic	Female	64	single nuclei	10x-3'-v3	3'	Illumina Novaseq 6000	NeuN	GRCh38	cellranger/GRCh38-2020-A	cellranger-7.0.1
Baylor College of Medicine	Rui Chen	Chen_rgc_10x3v31_19_D009_Mac_NeuN_T	Chen_rgc	Chen_19_D009	macular	Hispanic	Male	68	single nuclei	10x-3'-v3	3'	Illumina Novaseq 6000	NeuN	GRCh38	cellranger/GRCh38-2020-A	cellranger-7.0.1
Baylor College of Medicine	Rui Chen	Chen_rgc_10x3v31_19_D011_Macular_NeuN_T	Chen_rgc	Chen_19_D011	macular	Caucasian	Female	90	single nuclei	10x-3'-v3	3'	Illumina Novaseq 6000	NeuN	GRCh38	cellranger/GRCh38-2020-A	cellranger-7.0.1
Genentech Inc.	Jason A Hackney	Hackney_GSM3988006	Hackney	Hackney_109829	Unknown	Caucasian	Female	77	single nuclei				None	GRCh38	gencode v27	GSNAP
Genentech Inc.	Jason A Hackney	Hackney_GSM3988007	Hackney	Hackney_109829	Unknown	Caucasian	Female	77	single nuclei				None	GRCh38	gencode v27	GSNAP
Genentech Inc.	Jason A Hackney	Hackney_GSM3988008	Hackney	Hackney_120974	Unknown	Caucasian	Male	79	single nuclei				None	GRCh38	gencode v27	GSNAP
Genentech Inc.	Jason A Hackney	Hackney_GSM3988009	Hackney	Hackney_120974	Unknown	Caucasian	Male	79	single nuclei				None	GRCh38	gencode v27	GSNAP
Genentech Inc.	Jason A Hackney	Hackney_GSM3988010	Hackney	Hackney_120974	Unknown	Caucasian	Male	79	single nuclei				None	GRCh38	gencode v27	GSNAP
Genentech Inc.	Jason A Hackney	Hackney_GSM3988011	Hackney	Hackney_109373	Unknown	Caucasian	Male	70	single nuclei				None	GRCh38	gencode v27	GSNAP
Genentech Inc.	Jason A Hackney	Hackney_GSM3988012	Hackney	Hackney_109373	Unknown	Caucasian	Male	70	single nuclei				None	GRCh38	gencode v27	GSNAP
Genentech Inc.	Jason A Hackney	Hackney_GSM3988013	Hackney	Hackney_109373	Unknown	Caucasian	Male	70	single nuclei				None	GRCh38	gencode v27	GSNAP
Genentech Inc.	Jason A Hackney	Hackney_GSM3988014	Hackney	Hackney_110814	Unknown	Caucasian	Male	65	single nuclei				None	GRCh38	gencode v27	GSNAP
Genentech Inc.	Jason A Hackney	Hackney_GSM3988015	Hackney	Hackney_110814	Unknown	Caucasian	Male	65	single nuclei				None	GRCh38	gencode v27	GSNAP
Genentech Inc.	Jason A Hackney	Hackney_GSM3988016	Hackney	Hackney_110814	Unknown	Caucasian	Male	65	single nuclei				None	GRCh38	gencode v27	GSNAP
Yale School of Medicine	Brian Hafler	Hafler_GSM4081524	Hafler	Hafler_555	macular	NA (confidencial)	Male	68	single cell	10x-3'	3'	Illumina NextSeq 500	None	GRCh38	cellranger/GRCh38-2020-A	cellranger-7.0.1
Yale School of Medicine	Brian Hafler	Hafler_GSM4081525	Hafler	Hafler_555	periphery	NA (confidencial)	Male	68	single cell	10x-3'	3'	Illumina NextSeq 500	None	GRCh38	cellranger/GRCh38-2020-A	cellranger-7.0.1
Yale School of Medicine	Brian Hafler	Hafler_GSM4081526	Hafler	Hafler_574	macular	NA (confidencial)	Male	71	single cell	10x-3'	3'	Illumina NextSeq 500	None	GRCh38	cellranger/GRCh38-2020-A	cellranger-7.0.1
Yale School of Medicine	Brian Hafler	Hafler_GSM4081527	Hafler	Hafler_574	periphery	NA (confidencial)	Male	71	single cell	10x-3'	3'	Illumina NextSeq 500	None	GRCh38	cellranger/GRCh38-2020-A	cellranger-7.0.1
Yale School of Medicine	Brian Hafler	Hafler_GSM4081528	Hafler	Hafler_607	macular	NA (confidencial)	Male	86	single cell	10x-3'	3'	Illumina NextSeq 500	None	GRCh38	cellranger/GRCh38-2020-A	cellranger-7.0.1
Yale School of Medicine	Brian Hafler	Hafler_GSM4081529	Hafler	Hafler_607	periphery	NA (confidencial)	Male	86	single cell	10x-3'	3'	Illumina NextSeq 500	None	GRCh38	cellranger/GRCh38-2020-A	cellranger-7.0.1
Institute of Molecular and Clinical Ophthalmology Basel	Botond Roska	Roska_R-00646_01_Fovea_Retina_Right	Roska	Roska_R-00646_01	fovea	NA (confidencial)	Male	50-80	single cell	10x-3'	3'	Illumina HiSeq2500	None	GRCh38	cellranger/GRCh38-2020-A	cellranger-7.0.1
Institute of Molecular and Clinical Ophthalmology Basel	Botond Roska	Roska_R-00646_01_Periphery_ChoroidRPE_Left	Roska	Roska_R-00646_01	periphery	NA (confidencial)	Male	50-80	single cell	10x-3'	3'	Illumina HiSeq2500	None	GRCh38	cellranger/GRCh38-2020-A	cellranger-7.0.1
Institute of Molecular and Clinical Ophthalmology Basel	Botond Roska	Roska_R-00646_01_Periphery_Retina_Left	Roska	Roska_R-00646_01	periphery	NA (confidencial)	Male	50-80	single cell	10x-3'	3'	Illumina HiSeq2500	None	GRCh38	cellranger/GRCh38-2020-A	cellranger-7.0.1
Institute of Molecular and Clinical Ophthalmology Basel	Botond Roska	Roska_R-00646_01_Periphery_Retina_Right	Roska	Roska_R-00646_01	periphery	NA (confidencial)	Male	50-80	single cell	10x-3'	3'	Illumina HiSeq2500	None	GRCh38	cellranger/GRCh38-2020-A	cellranger-7.0.1
Institute of Molecular and Clinical Ophthalmology Basel	Botond Roska	Roska_R-00646_03_Fovea_Retina_Left	Roska	Roska_R-00646_03	fovea	NA (confidencial)	Female	50-80	single cell	10x-3'	3'	Illumina HiSeq2500	None	GRCh38	cellranger/GRCh38-2020-A	cellranger-7.0.1
Institute of Molecular and Clinical Ophthalmology Basel	Botond Roska	Roska_R-00646_03_Fovea_Retina_Right	Roska	Roska_R-00646_03	fovea	NA (confidencial)	Female	50-80	single cell	10x-3'	3'	Illumina HiSeq2500	None	GRCh38	cellranger/GRCh38-2020-A	cellranger-7.0.1
Institute of Molecular and Clinical Ophthalmology Basel	Botond Roska	Roska_R-00646_03_Periphery_Retina_Left	Roska	Roska_R-00646_03	periphery	NA (confidencial)	Female	50-80	single cell	10x-3'	3'	Illumina HiSeq2500	None	GRCh38	cellranger/GRCh38-2020-A	cellranger-7.0.1
Institute of Molecular and Clinical Ophthalmology Basel	Botond Roska	Roska_R-00646_03_Periphery_Retina_Right	Roska	Roska_R-00646_03	periphery	NA (confidencial)	Female	50-80	single cell	10x-3'	3'	Illumina HiSeq2500	None	GRCh38	cellranger/GRCh38-2020-A	cellranger-7.0.1
Institute of Molecular and Clinical Ophthalmology Basel	Botond Roska	Roska_R-00646_04_Fovea_Retina_Left	Roska	Roska_R-00646_04	fovea	NA (confidencial)	Female	50-80	single cell	10x-3'	3'	Illumina HiSeq2500	None	GRCh38	cellranger/GRCh38-2020-A	cellranger-7.0.1
Institute of Molecular and Clinical Ophthalmology Basel	Botond Roska	Roska_R-00646_04_Fovea_Retina_Right	Roska	Roska_R-00646_04	fovea	NA (confidencial)	Female	50-80	single cell	10x-3'	3'	Illumina HiSeq2500	None	GRCh38	cellranger/GRCh38-2020-A	cellranger-7.0.1
Institute of Molecular and Clinical Ophthalmology Basel	Botond Roska	Roska_R-00646_04_Periphery_Retina_Left	Roska	Roska_R-00646_04	periphery	NA (confidencial)	Female	50-80	single cell	10x-3'	3'	Illumina HiSeq2500	None	GRCh38	cellranger/GRCh38-2020-A	cellranger-7.0.1
Institute of Molecular and Clinical Ophthalmology Basel	Botond Roska	Roska_R-00646_04_Periphery_Retina_Right	Roska	Roska_R-00646_04	periphery	NA (confidencial)	Female	50-80	single cell	10x-3'	3'	Illumina HiSeq2500	None	GRCh38	cellranger/GRCh38-2020-A	cellranger-7.0.1
Institute of Molecular and Clinical Ophthalmology Basel	Botond Roska	Roska_R-00646_07_Periphery_ChoroidRPE	Roska	Roska_R-00646_07	periphery	NA (confidencial)	Male	50-80	single cell	10x-3'	3'	Illumina HiSeq2500	None	GRCh38	cellranger/GRCh38-2020-A	cellranger-7.0.1
Institute of Molecular and Clinical Ophthalmology Basel	Botond Roska	Roska_R-00646_07_Periphery_Retina	Roska	Roska_R-00646_07	periphery	NA (confidencial)	Male	50-80	single cell	10x-3'	3'	Illumina HiSeq2500	None	GRCh38	cellranger/GRCh38-2020-A	cellranger-7.0.1
Institute of Molecular and Clinical Ophthalmology Basel	Botond Roska	Roska_R-00646_07_Periphery_RetinaChoroidRPE	Roska	Roska_R-00646_07	periphery	NA (confidencial)	Male	50-80	single cell	10x-3'	3'	Illumina HiSeq2500	None	GRCh38	cellranger/GRCh38-2020-A	cellranger-7.0.1
Harvard University	Joshua R. Sanes	Sanes_H11FoveaS1	Sanes	Sanes_H11	fovea	Caucasian	Male	65	single cell	10x-3'	3'	Illumina HiSeq2500	None	GRCh38	cellranger/GRCh38-2020-A	cellranger-7.0.1
Harvard University	Joshua R. Sanes	Sanes_H1CD73dpS1	Sanes	Sanes_H1	periphery	Caucasian	Male	74	single cell	10x-v2	3'	Illumina HiSeq2500	None	GRCh38	cellranger/GRCh38-2020-A	cellranger-7.0.1
Harvard University	Joshua R. Sanes	Sanes_H1CD90S1	Sanes	Sanes_H1	periphery	Caucasian	Male	74	single cell	10x-v2	3'	Illumina HiSeq2500	None	GRCh38	cellranger/GRCh38-2020-A	cellranger-7.0.1
Harvard University	Joshua R. Sanes	Sanes_H2Fovea1S1	Sanes	Sanes_H2	fovea	Caucasian	Male	78	single cell	10x-v2	3'	Illumina HiSeq2500	None	GRCh38	cellranger/GRCh38-2020-A	cellranger-7.0.1
Harvard University	Joshua R. Sanes	Sanes_H2Fovea2S1	Sanes	Sanes_H2	fovea	Caucasian	Male	78	single cell	10x-v2	3'	Illumina HiSeq2500	None	GRCh38	cellranger/GRCh38-2020-A	cellranger-7.0.1
Harvard University	Joshua R. Sanes	Sanes_H3CD73dpS1	Sanes	Sanes_H3	periphery	Caucasian	Male	60	single cell	10x-v2	3'	Illumina HiSeq2500	None	GRCh38	cellranger/GRCh38-2020-A	cellranger-7.0.1
Harvard University	Joshua R. Sanes	Sanes_H3CD73dpS2	Sanes	Sanes_H3	periphery	Caucasian	Male	60	single cell	10x-v2	3'	Illumina HiSeq2500	None	GRCh38	cellranger/GRCh38-2020-A	cellranger-7.0.1
Harvard University	Joshua R. Sanes	Sanes_H3CD90S1	Sanes	Sanes_H3	periphery	Caucasian	Male	60	single cell	10x-v2	3'	Illumina HiSeq2500	None	GRCh38	cellranger/GRCh38-2020-A	cellranger-7.0.1
Harvard University	Joshua R. Sanes	Sanes_H3CD90S2	Sanes	Sanes_H3	periphery	Caucasian	Male	60	single cell	10x-v2	3'	Illumina HiSeq2500	None	GRCh38	cellranger/GRCh38-2020-A	cellranger-7.0.1
Harvard University	Joshua R. Sanes	Sanes_H3FoveaS1	Sanes	Sanes_H3	fovea	Caucasian	Male	60	single cell	10x-v2	3'	Illumina HiSeq2500	None	GRCh38	cellranger/GRCh38-2020-A	cellranger-7.0.1
Harvard University	Joshua R. Sanes	Sanes_H3FoveaS2	Sanes	Sanes_H3	fovea	Caucasian	Male	60	single cell	10x-v2	3'	Illumina HiSeq2500	None	GRCh38	cellranger/GRCh38-2020-A	cellranger-7.0.1
Harvard University	Joshua R. Sanes	Sanes_H3FoveaS3	Sanes	Sanes_H3	fovea	Caucasian	Male	60	single cell	10x-v2	3'	Illumina HiSeq2500	None	GRCh38	cellranger/GRCh38-2020-A	cellranger-7.0.1
Harvard University	Joshua R. Sanes	Sanes_H4FoveaS1	Sanes	Sanes_H4	fovea	Caucasian	Male	64	single cell	10x-v2	3'	Illumina HiSeq2500	None	GRCh38	cellranger/GRCh38-2020-A	cellranger-7.0.1
Harvard University	Joshua R. Sanes	Sanes_H5FoveaS1	Sanes	Sanes_H5	fovea	Caucasian	Male	69	single cell	10x-v2	3'	Illumina HiSeq2500	None	GRCh38	cellranger/GRCh38-2020-A	cellranger-7.0.1
Harvard University	Joshua R. Sanes	Sanes_H5FoveaS2	Sanes	Sanes_H5	fovea	Caucasian	Male	69	single cell	10x-v2	3'	Illumina HiSeq2500	None	GRCh38	cellranger/GRCh38-2020-A	cellranger-7.0.1
Harvard University	Joshua R. Sanes	Sanes_H5FoveaS3	Sanes	Sanes_H5	fovea	Caucasian	Male	69	single cell	10x-v2	3'	Illumina HiSeq2500	None	GRCh38	cellranger/GRCh38-2020-A	cellranger-7.0.1
Harvard University	Joshua R. Sanes	Sanes_H5FoveaS4	Sanes	Sanes_H5	fovea	Caucasian	Male	69	single cell	10x-v2	3'	Illumina HiSeq2500	None	GRCh38	cellranger/GRCh38-2020-A	cellranger-7.0.1
Harvard University	Joshua R. Sanes	Sanes_H5FoveaS5	Sanes	Sanes_H5	fovea	Caucasian	Male	69	single cell	10x-v2	3'	Illumina HiSeq2500	None	GRCh38	cellranger/GRCh38-2020-A	cellranger-7.0.1
Harvard University	Joshua R. Sanes	Sanes_H9FoveaS1	Sanes	Sanes_H9	fovea	Caucasian	Female	53	single cell	10x-v2	3'	Illumina HiSeq2500	None	GRCh38	cellranger/GRCh38-2020-A	cellranger-7.0.1
The University of Iowa	T.E. Scheetz	Scheetz_GSM3745992	Scheetz	Scheetz_Donor1	fovea	Caucasian	Male	89	single cell	10x-3'	3'	Illumina HiSeq 4000	None	GRCh38	cellranger/GRCh38-2020-A	cellranger-7.0.1
The University of Iowa	T.E. Scheetz	Scheetz_GSM3745993	Scheetz	Scheetz_Donor2	fovea	Caucasian	Male	54	single cell	10x-3'	3'	Illumina HiSeq 4000	None	GRCh38	cellranger/GRCh38-2020-A	cellranger-7.0.1
The University of Iowa	T.E. Scheetz	Scheetz_GSM3745994	Scheetz	Scheetz_Donor3	fovea	Caucasian	Female	82	single cell	10x-3'	3'	Illumina HiSeq 4000	None	GRCh38	cellranger/GRCh38-2020-A	cellranger-7.0.1
The University of Iowa	T.E. Scheetz	Scheetz_GSM3745995	Scheetz	Scheetz_Donor1	periphery	Caucasian	Male	89	single cell	10x-3'	3'	Illumina HiSeq 4000	None	GRCh38	cellranger/GRCh38-2020-A	cellranger-7.0.1
The University of Iowa	T.E. Scheetz	Scheetz_GSM3745996	Scheetz	Scheetz_Donor2	periphery	Caucasian	Male	54	single cell	10x-3'	3'	Illumina HiSeq 4000	None	GRCh38	cellranger/GRCh38-2020-A	cellranger-7.0.1
The University of Iowa	T.E. Scheetz	Scheetz_GSM3745997	Scheetz	Scheetz_Donor3	periphery	Caucasian	Female	82	single cell	10x-3'	3'	Illumina HiSeq 4000	None	GRCh38	cellranger/GRCh38-2020-A	cellranger-7.0.1
University of Melbourne	Raymond CB Wong	Wong_Retina_1	Wong	Wong_Donor_1	Unknown	Caucasian	Female	80	single cell	10x-v2	3'	Illumina HiSeq2500	None	GRCh38	cellranger/GRCh38-2020-A	cellranger-7.0.1
University of Melbourne	Raymond CB Wong	Wong_Retina_2A	Wong	Wong_Donor_2	Unknown	Caucasian	Male	42	single cell	10x-v2	3'	Illumina HiSeq2500	None	GRCh38	cellranger/GRCh38-2020-A	cellranger-7.0.1
University of Melbourne	Raymond CB Wong	Wong_Retina_2B	Wong	Wong_Donor_2	Unknown	Caucasian	Male	42	single cell	10x-v2	3'	Illumina HiSeq2500	None	GRCh38	cellranger/GRCh38-2020-A	cellranger-7.0.1
University of Melbourne	Raymond CB Wong	Wong_Retina_3A	Wong	Wong_Donor_3	Unknown	Caucasian	Female	53	single cell	10x-v2	3'	Illumina HiSeq2500	None	GRCh38	cellranger/GRCh38-2020-A	cellranger-7.0.1
University of Melbourne	Raymond CB Wong	Wong_Retina_3B	Wong	Wong_Donor_3	Unknown	Caucasian	Female	53	single cell	10x-v2	3'	Illumina HiSeq2500	None	GRCh38	cellranger/GRCh38-2020-A	cellranger-7.0.1
