# Supplementary material for: Integrated multi-omics single cell atlas of the human retina
Source: Research Square preprint supplement (doi:10.21203/rs.3.rs-3471275/v1), 2023-11-16
Supplement: Supplementary file 3 [file 466d2616d77b574fb9e58d10.xlsx]

## Sheet: FritscheLG AMD
Table S20. Fine-mapped genetic variants for seven GWAS traits
LD block	GWAS variant	Z score	functional PIP	uniform PIP	genomic annotation	linked or nearby gene	overlapped eQTL
chr10:123900545-125869346_7	chr10:124217632:rs2014307:G:T	-29.8518	1	1	peak|	gene;var:HTRA1|
chr10:123900545-125869346_5	chr10:124219275:rs3793917:G:C	37.5295	1	1	peak|	gene;var:HTRA1|
chr10:123900545-125869346_2	chr10:124223944:rs2248799:T:C	36.4524	1	1		gene;var:HTRA1|
chr10:123900545-125869346_6	chr10:124224916:rs2248929:T:G	-27.9161	1	1	DAR|peak|	gene;var:HTRA1|
chr10:123900545-125869346_1	chr10:124226215:rs2249049:G:A	-21.3833	1	1	peak|	gene;var:HTRA1|
chr10:123900545-125869346_3	chr10:124234604:rs2672590:C:A	-20.6365	1	1	peak|	gene;var:HTRA1|
chr10:123900545-125869346_4	chr10:124234988:rs2672589:A:G	-26.9352	1	1	peak|	gene;var:HTRA1|
chr10:123900545-125869346_8	chr10:124226630:rs2284665:T:G	37.5295	1	1		gene;var:HTRA1|
chr1:194107442-196176201_2	chr1:196118341:rs12119733:C:G	-11.0044	1	1		gene;var:KCNT2|
chr1:194107442-196176201_5	chr1:196069691:rs116370134:A:G	-5.69552	0.999915	0.999918		gene;var:KCNT2|
chr1:194107442-196176201_1	chr1:196175301:rs78726513:A:G	-11.6494	0.996694	0.99665		gene;var:KCNT2|
chr1:194107442-196176201_7	chr1:196087110:rs11588705:T:C	6.13455	0.933355	0.933364		gene;var:KCNT2|
chr1:194107442-196176201_6	chr1:196026853:rs76071329:A:C	-6.32393	0.739202	0.738524		gene;var:KCNT2|
chr1:194107442-196176201_3	chr1:196166502:rs78471505:C:A	7.14981	0.611473	0.611472		gene;var:KCNT2|
chr1:194107442-196176201_10	chr1:196154791:rs76329085:C:A	-9.78469	0.542529	0.543007		gene;var:KCNT2|
chr1:194107442-196176201_9	chr1:196086337:rs186642772:A:G	5.59549	0.506825	0.507255		gene;var:KCNT2|
chr1:194107442-196176201_9	chr1:196095929:rs141817299:C:T	5.57893	0.472693	0.473096		gene;var:KCNT2|
chr1:194107442-196176201_4	chr1:195993031:rs115672988:G:C	5.69005	0.396189	0.396213		gene;var:KCNT2|
chr1:194107442-196176201_3	chr1:196118466:rs75179624:A:G	7.08405	0.388717	0.388719		gene;var:KCNT2|
chr1:194107442-196176201_10	chr1:196059008:rs79001184:C:T	-9.46957	0.230691	0.230427		gene;var:KCNT2|
chr1:194107442-196176201_6	chr1:196172288:rs147065121:A:G	-6.45253	0.217138	0.217705		gene;var:KCNT2|
chr1:194107442-196176201_4	chr1:195978645:rs77604464:G:C	5.71454	0.202431	0.202412		gene;var:KCNT2|
chr1:194107442-196176201_4	chr1:195978714:rs115263666:G:T	5.713	0.2008	0.200781		gene;var:KCNT2|
chr1:194107442-196176201_10	chr1:196046115:rs79157236:C:A	-9.42977	0.192421	0.192204		gene;var:KCNT2|
chr1:194107442-196176201_4	chr1:195987823:rs79791044:A:G	5.68088	0.169708	0.169694		gene;var:KCNT2|
chr1:194107442-196176201_7	chr1:196005564:rs2123079:G:A	5.8785	0.0612041	0.0613786		gene;var:KCNT2|
chr1:196176201-197311514_3	chr1:196680814:rs1831281:T:C	-32.3352	1	1		gene;var:CFHR4|
chr1:196176201-197311514_2	chr1:196710916:rs16840522:C:T	-36.5186	1	1		gene;var:CFHR3|
chr1:196176201-197311514_4	chr1:196811860:rs146093852:C:T	32.0953	1	1		gene;var:CFHR1|
chr1:196176201-197311514_6	chr1:196815708:rs71524421:G:C	26.8266	1	1		gene;var:CFHR1|
chr1:196176201-197311514_10	chr1:196819109:rs1754448:G:A	-26.0966	1	1		gene;var:CFHR1|
chr1:196176201-197311514_1	chr1:196842574:rs2336502:C:T	-28.0674	1	1		gene;var:CFHR4|
chr1:196176201-197311514_7	chr1:197042842:rs149742942:G:A	-5.71609	1	1		gene;var:F13B|
chr1:196176201-197311514_9	chr1:196702810:rs1329428:T:C	-37.5295	0.5	0.5		gene;var:CFHR3|
chr1:196176201-197311514_9	chr1:196704559:rs1329427:T:C	-37.5295	0.5	0.5		gene;var:CFHR3|
chr1:197311514-199239884_9	chr1:197317238:rs10922199:A:G	-7.60632	1	1		gene;var:CRB1|
chr1:197311514-199239884_4	chr1:197431246:rs79963913:C:T	7.90267	1	1		gene;var:CRB1|
chr1:197311514-199239884_10	chr1:197508901:rs4915551:A:G	-5.67585	1	1		gene;var:DENND1B|
chr1:197311514-199239884_3	chr1:197341587:rs74760246:T:A	11.8027	2.12052e-05	0.999592		gene;var:CRB1|
chr1:197311514-199239884_6	chr1:197741951:rs2477067:A:C	-6.38716	0.947423	0.999547	peak|	gene;var:DENND1B|
chr1:197311514-199239884_1	chr1:197769365:rs12145913:G:A	13.0117	4.31958e-09	0.999334		gene;var:DENND1B|
chr1:197311514-199239884_2	chr1:197646544:rs12751508:T:C	7.68753	0.983244	0.963009		gene;var:DENND1B|
chr1:197311514-199239884_8	chr1:197326492:rs150045102:T:A	-7.79002	0.989704	0.951585	3_UTR|peak|	gene;var:CRB1|
chr1:197311514-199239884_5	chr1:197333957:rs141403303:A:G	-7.78983	0.936293	0.926173		gene;var:CRB1|
chr1:197311514-199239884_7	chr1:197764997:rs140472630:T:A	-10.2337	0.653573	0.671495		gene;var:DENND1B|
chr1:197311514-199239884_7	chr1:197592166:rs148823964:T:C	-10.1822	0.0939043	0.0919565		gene;var:DENND1B|
chr1:197311514-199239884_7	chr1:197766291:rs6693395:G:A	-10.2351	0.091837	0.0896099		gene;var:DENND1B|
chr1:197311514-199239884_7	chr1:197653854:rs78823478:G:A	-10.1682	0.0421251	0.0410265		gene;var:DENND1B|
chr1:197311514-199239884_7	chr1:197697093:rs116252612:C:T	-10.1584	0.03761	0.0366191		gene;var:DENND1B|
chr1:197311514-199239884_5	chr1:197385847:rs182013226:A:T	-7.89049	0.0316223	0.0362143		gene;var:CRB1|
chr1:197311514-199239884_7	chr1:197604580:rs142570636:T:C	-10.1366	0.0166332	0.0236711		gene;var:DENND1B|
chr12:110336719-113263518_1	chr12:112545374:rs56143183:G:A	5.54858	0.765296	0.795778		gene;var:NAA25|
chr12:110336719-113263518_1	chr12:111867293:rs61944375:C:A	5.59948	0.0160694	0.617621	DAR|peak|	gene;var:SH2B3|
chr12:110336719-113263518_1	chr12:112132610:rs61941274:A:G	6.0986	0.559947	0.607573		gene;var:ACAD10|
chr12:110336719-113263518_1	chr12:112116776:rs61941272:A:C	6.09418	0.55873	0.606421		gene;var:BRAP|
chr12:110336719-113263518_1	chr12:112118204:rs73203678:T:C	6.09418	0.55873	0.606421		gene;var:BRAP|
chr12:110336719-113263518_1	chr12:112330305:rs61941287:G:A	6.0674	0.551542	0.599618		gene;var:ADAM1A|
chr12:110336719-113263518_1	chr12:112357085:rs73205633:T:C	6.0578	0.549041	0.597252		gene;var:ADAM1A|
chr12:110336719-113263518_1	chr12:112242736:rs61941278:G:A	6.04117	0.544806	0.593246		gene;var:MAPKAPK5-AS1|
chr12:110336719-113263518_1	chr12:112461191:rs61941310:C:A	5.45563	0.503169	0.559788		gene;var:ERP29|
chr12:110336719-113263518_1	chr12:112080669:rs73203613:C:T	5.57893	0.953957	0.556399	3_UTR|peak|	gene;var:BRAP|
chr12:110336719-113263518_1	chr12:112170040:rs61941275:G:A	5.54144	0.493942	0.550582		gene;var:ACAD10|
chr12:55665837-57548860_1	chr12:56115778:rs3138141:A:C	5.87222	0.839087	0.74317	3_UTR|	gene;var:RDH5|
chr12:55665837-57548860_1	chr12:56115585:rs3138142:T:C	5.83374	0.810951	0.716084	3_UTR|	gene;var:RDH5|
chr12:55665837-57548860_1	chr12:56213297:rs56108400:T:G	5.5833	0.313758	0.646806		gene;var:ORMDL2|
chr13:30483267-32301815_3	chr13:31821240:rs9564692:T:C	-6.28352	0.690721	0.683284		gene;var:B3GLCT|
chr13:30483267-32301815_3	chr13:31819391:rs7981280:T:C	-6.22881	0.609245	0.599229		gene;var:B3GLCT|
chr13:30483267-32301815_3	chr13:31819384:rs7989761:C:A	-6.20702	0.53659	0.525324		gene;var:B3GLCT|
chr13:30483267-32301815_3	chr13:31826541:rs147567958:A:G	-5.59707	0.488951	0.474079		gene;var:B3GLCT|
chr13:30483267-32301815_3	chr13:31836367:rs4943290:T:G	-5.47279	0.472449	0.458062		gene;var:B3GLCT|
chr13:30483267-32301815_3	chr13:31824374:rs9805270:G:A	-5.67096	0.46777	0.453412		gene;var:B3GLCT|
chr13:30483267-32301815_3	chr13:31824650:rs9805284:T:C	-5.67217	0.46732	0.452974		gene;var:B3GLCT|
chr13:30483267-32301815_3	chr13:31825401:rs9572561:C:T	-5.67339	0.466872	0.452537		gene;var:B3GLCT|
chr13:30483267-32301815_3	chr13:31826394:rs148420384:G:C	-5.6771	0.465555	0.451247		gene;var:B3GLCT|
chr13:30483267-32301815_3	chr13:31828509:rs2313818:C:T	-5.67835	0.465095	0.450806		gene;var:B3GLCT|
chr13:30483267-32301815_3	chr13:31829126:rs9572689:G:A	-5.67835	0.465095	0.450806		gene;var:B3GLCT|
chr13:30483267-32301815_3	chr13:31834582:rs9564839:T:G	-5.67961	0.34022	0.450377	Promoter|	gene;var:B3GLCT|
chr13:30483267-32301815_3	chr13:31832054:rs2181967:G:A	-5.68088	0.464217	0.449951		gene;var:B3GLCT|
chr13:30483267-32301815_3	chr13:31835375:rs4943289:A:G	-5.74522	0.326399	0.433707	Promoter|peak|	gene;var:B3GLCT|
chr13:30483267-32301815_3	chr13:31821505:rs2137075:G:A	-5.77754	0.442824	0.429224		gene;var:B3GLCT|
chr13:30483267-32301815_3	chr13:31839274:rs9572914:A:G	-5.57397	0.436614	0.422947		gene;var:B3GLCT|
chr14:67992317-71131957_2	chr14:68177579:rs11624933:G:T	6.3276	0.692228	0.694344		gene;var:RDH12|
chr14:67992317-71131957_3	chr14:68878582:rs17105571:G:A	5.72245	0.933977	0.608406		gene;var:ZFP36L1|
chr14:67992317-71131957_3	chr14:68880753:rs4545737:G:A	5.67835	0.014237	0.454537	DAR|peak|	gene;var:ZFP36L1|
chr14:67992317-71131957_2	chr14:68205375:rs72723171:C:A	6.06617	0.381429	0.392562		gene;var:RDH12|
chr14:67992317-71131957_6	chr14:68740924:rs7148882:G:A	-6.20557	0.119103	0.145047		gene;var:RAD51B|
chr14:67992317-71131957_6	chr14:68739301:rs8015139:T:G	-6.20328	0.118855	0.144732		gene;var:RAD51B|
chr14:67992317-71131957_6	chr14:68747868:rs7148416:T:A	-6.21661	0.118773	0.144611		gene;var:RAD51B|
chr14:67992317-71131957_6	chr14:68743307:rs10131490:G:A	-6.12585	0.11879	0.144122		gene;var:RAD51B|
chr14:67992317-71131957_6	chr14:68728425:rs28498223:T:C	-6.06133	0.247859	0.127666	peak|	gene;var:RAD51B|
chr14:67992317-71131957_6	chr14:68749927:rs3784099:A:G	-6.28541	0.245693	0.126542	peak|	gene;var:RAD51B|
chr14:67992317-71131957_6	chr14:68729224:rs1957570:C:A	-6.05548	0.102886	0.124289		gene;var:RAD51B|
chr14:67992317-71131957_6	chr14:68799787:rs1956526:C:A	-6.39082	0.101262	0.117634		gene;var:ZFP36L1|
chr14:67992317-71131957_6	chr14:68760141:rs1950897:T:C	-6.242	0.230918	0.117525	peak|	gene;var:RAD51B|
chr14:67992317-71131957_6	chr14:68728479:rs17105278:C:T	-5.9772	0.229102	0.1165	peak|	gene;var:RAD51B|
chr14:67992317-71131957_6	chr14:68753593:rs911263:T:C	-6.15432	0.227152	0.115432	peak|	gene;var:RAD51B|
chr14:67992317-71131957_6	chr14:68727506:rs1957569:G:A	-5.73073	0.0943966	0.112304		gene;var:RAD51B|
chr14:67992317-71131957_6	chr14:68754695:rs1885013:A:G	-6.16251	0.0915236	0.109641		gene;var:RAD51B|
chr14:67992317-71131957_6	chr14:68754417:rs2104047:C:T	-6.15729	0.0912537	0.109291		gene;var:RAD51B|
chr14:67992317-71131957_6	chr14:68769199:rs61985136:T:C	-6.39939	0.0918198	0.10695		gene;var:RAD51B|
chr14:67992317-71131957_6	chr14:68752643:rs8008961:T:C	-5.9891	0.0884346	0.105416		gene;var:RAD51B|
chr14:67992317-71131957_6	chr14:68757759:rs7155473:T:A	-6.30564	0.0901876	0.105233		gene;var:RAD51B|
chr14:67992317-71131957_6	chr14:68753287:rs2208397:G:T	-5.98305	0.0881657	0.105066		gene;var:RAD51B|
chr14:67992317-71131957_6	chr14:68781593:rs12890109:A:C	-6.3301	0.0883907	0.102996		gene;var:ZFP36L1|
chr14:67992317-71131957_6	chr14:68781614:rs12890124:A:C	-6.32393	0.08812	0.102678		gene;var:ZFP36L1|
chr14:67992317-71131957_6	chr14:68783791:rs12881502:C:A	-6.31857	0.209152	0.102407	peak|	gene;var:ZFP36L1|
chr14:67992317-71131957_6	chr14:68760986:rs2877455:G:C	-6.30403	0.0874945	0.10195		gene;var:RAD51B|
chr14:67992317-71131957_6	chr14:68773469:rs3784104:G:A	-6.30891	0.0874791	0.101927		gene;var:RAD51B|
chr14:67992317-71131957_6	chr14:68781595:rs12890110:T:C	-6.3051	0.0873203	0.10174		gene;var:ZFP36L1|
chr14:67992317-71131957_6	chr14:68785077:rs8017304:A:G	-6.29775	0.206828	0.101125	peak|	gene;var:ZFP36L1|
chr14:67992317-71131957_6	chr14:68782317:rs11628825:T:C	-6.28877	0.0866569	0.100961		gene;var:ZFP36L1|
chr14:67992317-71131957_6	chr14:68786993:rs11626138:G:A	-6.28828	0.0864709	0.100684		gene;var:ZFP36L1|
chr14:67992317-71131957_6	chr14:68769195:rs61985135:T:C	-6.34391	0.0865336	0.100673		gene;var:RAD51B|
chr14:67992317-71131957_6	chr14:68773353:rs2180770:A:G	-6.27663	0.0863856	0.100648		gene;var:RAD51B|
chr14:67992317-71131957_6	chr14:68788924:rs1956529:T:C	-6.28493	0.08634	0.100531		gene;var:ZFP36L1|
chr14:67992317-71131957_6	chr14:68783274:rs1956532:C:T	-6.27618	0.0860033	0.100137		gene;var:ZFP36L1|
chr14:67992317-71131957_6	chr14:68787881:rs7146850:C:A	-6.27528	0.0859694	0.100097		gene;var:ZFP36L1|
chr14:67992317-71131957_6	chr14:68788968:rs1956528:C:T	-6.27351	0.0859023	0.100018		gene;var:ZFP36L1|
chr14:67992317-71131957_6	chr14:68793704:rs7150988:T:C	-6.26162	0.0856556	0.0997339		gene;var:ZFP36L1|
chr14:67992317-71131957_6	chr14:68795149:rs12878627:A:G	-6.2604	0.0856104	0.0996809		gene;var:ZFP36L1|
chr14:67992317-71131957_6	chr14:68796465:rs12884901:A:G	-6.25918	0.0855656	0.0996285		gene;var:ZFP36L1|
chr14:67992317-71131957_6	chr14:68789683:rs3784108:C:T	-6.26244	0.0855768	0.0995974		gene;var:ZFP36L1|
chr14:67992317-71131957_6	chr14:68792926:rs11626195:A:G	-6.25247	0.085321	0.0993418		gene;var:ZFP36L1|
chr14:67992317-71131957_6	chr14:68782604:rs11628954:T:C	-6.25481	0.0852146	0.0992128		gene;var:ZFP36L1|
chr14:67992317-71131957_6	chr14:68782300:rs11628890:A:G	-6.22649	0.0850708	0.0990074		gene;var:ZFP36L1|
chr14:67992317-71131957_6	chr14:68796799:rs7147852:T:C	-6.24237	0.084961	0.0989197		gene;var:ZFP36L1|
chr14:67992317-71131957_6	chr14:68796930:rs2145423:G:A	-6.24237	0.084961	0.0989197		gene;var:ZFP36L1|
chr14:67992317-71131957_6	chr14:68797169:rs2145422:C:G	-6.23985	0.0848728	0.0988163		gene;var:ZFP36L1|
chr14:67992317-71131957_6	chr14:68772610:rs1108590:G:A	-6.31452	0.0848037	0.0987899		gene;var:RAD51B|
chr14:67992317-71131957_6	chr14:68770031:rs12885750:G:T	-6.31395	0.0847839	0.0987667		gene;var:RAD51B|
chr14:67992317-71131957_6	chr14:68764254:rs12880842:G:A	-6.28211	0.202106	0.0987259	peak|	gene;var:RAD51B|
chr14:67992317-71131957_6	chr14:68776060:rs11158729:C:T	-6.31169	0.084706	0.0986749		gene;var:ZFP36L1|
chr14:67992317-71131957_6	chr14:68810217:rs12883719:T:G	-6.22847	0.0844827	0.0983587		gene;var:ZFP36L1|
chr14:67992317-71131957_6	chr14:68774854:rs12889949:G:T	-6.30297	0.201372	0.0983258	peak|	gene;var:ZFP36L1|
chr14:67992317-71131957_6	chr14:68809564:rs11627646:A:T	-6.22781	0.0842832	0.098121		gene;var:ZFP36L1|
chr14:67992317-71131957_6	chr14:68807298:rs2064911:C:T	-6.22068	0.0841873	0.0980578		gene;var:ZFP36L1|
chr14:67992317-71131957_6	chr14:68812330:rs7158493:G:C	-6.22227	0.0841011	0.0979073		gene;var:ZFP36L1|
chr14:67992317-71131957_6	chr14:68800393:rs1956524:A:G	-6.21416	0.0838395	0.0976004		gene;var:ZFP36L1|
chr14:67992317-71131957_6	chr14:68786797:rs12878858:A:G	-6.20046	0.0838953	0.0975806		gene;var:ZFP36L1|
chr14:67992317-71131957_6	chr14:68807132:rs2064912:G:A	-6.19741	0.0833195	0.0969898		gene;var:ZFP36L1|
chr14:67992317-71131957_6	chr14:68789911:rs3784109:G:T	-6.27132	0.0832606	0.0969266		gene;var:ZFP36L1|
chr14:67992317-71131957_6	chr14:68778913:rs12892777:G:T	-6.24164	0.0829591	0.0965388		gene;var:ZFP36L1|
chr14:67992317-71131957_6	chr14:68790579:rs3825730:A:G	-6.15495	0.0825356	0.0959947		gene;var:ZFP36L1|
chr14:67992317-71131957_6	chr14:68777042:rs7148073:C:T	-6.17539	0.0820636	0.0954741		gene;var:ZFP36L1|
chr14:67992317-71131957_6	chr14:68770819:rs12886238:A:G	-6.20702	0.082005	0.0954197		gene;var:RAD51B|
chr14:67992317-71131957_6	chr14:68776170:rs10141370:A:G	-6.16951	0.0819111	0.0952954		gene;var:ZFP36L1|
chr14:67992317-71131957_6	chr14:68808824:rs10483807:G:A	-6.12834	0.0818293	0.09517		gene;var:ZFP36L1|
chr14:67992317-71131957_6	chr14:68812756:rs11158730:C:T	-6.12656	0.0817843	0.0951175		gene;var:ZFP36L1|
chr14:67992317-71131957_6	chr14:68813032:rs12880109:T:C	-6.12638	0.0817799	0.0951123		gene;var:ZFP36L1|
chr14:67992317-71131957_6	chr14:68812662:rs12896939:C:T	-6.12603	0.081771	0.0951019		gene;var:ZFP36L1|
chr14:67992317-71131957_6	chr14:68805323:rs911254:A:T	-6.11911	0.0815993	0.0949012		gene;var:ZFP36L1|
chr14:67992317-71131957_6	chr14:68805451:rs2013413:G:C	-6.11911	0.0815993	0.0949012		gene;var:ZFP36L1|
chr14:67992317-71131957_6	chr14:68799859:rs1956525:A:G	-6.03804	0.0808459	0.0939972		gene;var:ZFP36L1|
chr14:67992317-71131957_6	chr14:68799102:rs2180769:T:A	-6.08294	0.0799049	0.0929372		gene;var:ZFP36L1|
chr14:67992317-71131957_6	chr14:68815261:rs1028577:A:G	-5.97792	0.079194	0.0921363		gene;var:ZFP36L1|
chr15:58441366-59694116_1	chr15:58680638:rs2414577:C:T	-7.84557	0.571417	0.587147		gene;var:LIPC|
chr15:58441366-59694116_1	chr15:58680639:rs2414578:C:T	-7.84269	0.562297	0.578244		gene;var:LIPC|
chr15:58441366-59694116_2	chr15:58723939:rs2070895:A:G	-6.67874	0.418008	0.497147	Promoter|	gene;var:LIPC|
chr15:58441366-59694116_2	chr15:58723675:rs1800588:T:C	-6.63568	0.356624	0.435681	Promoter|	gene;var:LIPC|
chr15:58441366-59694116_2	chr15:58723426:rs1077835:G:A	-6.50752	0.21948	0.297246	Promoter|	gene;var:LIPC|
chr15:58441366-59694116_2	chr15:58723479:rs1077834:C:T	-6.50576	0.204928	0.283093	Promoter|	gene;var:LIPC|
chr15:58441366-59694116_2	chr15:58731153:rs261342:C:G	-6.09418	0.203405	0.220745		gene;var:LIPC|
chr16:55903774-57664330_1	chr16:57006378:rs11076175:G:A	-8.85131	0.341698	0.353927		gene;var:CETP|
chr16:55903774-57664330_1	chr16:57006590:rs7499892:T:C	-8.84002	0.326478	0.339937		gene;var:CETP|
chr16:55903774-57664330_1	chr16:57000696:rs8045855:A:T	-8.86256	0.314484	0.333233		gene;var:CETP|
chr16:55903774-57664330_1	chr16:57000885:rs12720922:A:G	-8.81103	0.293822	0.308377		gene;var:CETP|
chr16:55903774-57664330_2	chr16:56994528:rs17231506:T:C	8.74757	0.259799	0.292546		gene;var:CETP|
chr16:55903774-57664330_2	chr16:56987369:rs56156922:C:T	8.69204	0.246007	0.277776		gene;var:CETP|
chr16:55903774-57664330_2	chr16:56991363:rs183130:T:C	8.67908	0.227848	0.257464		gene;var:CETP|
chr16:55903774-57664330_2	chr16:56987015:rs12446515:T:C	8.69014	0.224409	0.254774		gene;var:CETP|
chr16:55903774-57664330_2	chr16:56990716:rs247617:A:C	8.65755	0.194894	0.223243		gene;var:CETP|
chr16:55903774-57664330_2	chr16:56989590:rs247616:T:C	8.63505	0.18358	0.211262		gene;var:CETP|
chr16:55903774-57664330_2	chr16:56993886:rs821840:G:A	8.61474	0.173713	0.201397		gene;var:CETP|
chr16:55903774-57664330_2	chr16:56993324:rs3764261:A:C	8.57733	0.369036	0.189696	peak|	gene;var:CETP|
chr16:55903774-57664330_1	chr16:57002732:rs9939224:G:T	-8.72465	0.13607	0.164055		gene;var:CETP|
chr17:21290357-27334244_2	chr17:26649724:rs11080055:C:A	5.72407	0.388898	0.475193		gene;var:TMEM97|
chr17:21290357-27334244_2	chr17:26633616:rs241777:T:C	5.69276	0.27739	0.471139	Promoter|	gene;var:KRT18P55|
chr17:21290357-27334244_2	chr17:26716821:rs4795433:T:C	-5.70846	0.382424	0.466384		gene;var:SARM1|
chr17:21290357-27334244_2	chr17:26612996:rs614877:T:C	-5.49852	0.380989	0.464531		gene;var:KRT18P55|
chr17:21290357-27334244_2	chr17:26716917:rs4795434:T:G	-5.69276	0.379126	0.462865		gene;var:SARM1|
chr17:21290357-27334244_2	chr17:26717268:rs4794828:A:G	-5.69005	0.377383	0.461167		gene;var:SARM1|
chr17:21290357-27334244_2	chr17:26631336:rs241779:A:C	-5.48139	0.375743	0.458944		gene;var:KRT18P55|
chr17:21290357-27334244_2	chr17:26718177:rs6505079:A:T	-5.67339	0.374114	0.457662		gene;var:SARM1|
chr17:21290357-27334244_2	chr17:26718592:rs9913833:T:C	-5.67217	0.373881	0.457412		gene;var:SARM1|
chr17:21290357-27334244_2	chr17:26703682:rs7212510:A:T	-5.67096	0.37365	0.457164		gene;var:SARM1|
chr17:21290357-27334244_2	chr17:26713970:rs967645:T:C	-5.61114	0.365549	0.448671		gene;var:SARM1|
chr17:21290357-27334244_2	chr17:26671196:rs733914:G:C	-5.59948	0.688975	0.443916	peak|	gene;var:TNFAIP1|
chr17:21290357-27334244_2	chr17:26670627:rs3093692:A:G	-5.59867	0.68882	0.443783	peak|	gene;var:TNFAIP1|
chr17:21290357-27334244_2	chr17:26706946:rs2027993:T:G	-5.52419	0.357948	0.440471		gene;var:SARM1|
chr17:21290357-27334244_2	chr17:26688663:rs708100:A:G	5.57327	0.255214	0.44027	Promoter|peak|	gene;var:MIR4723|
chr17:21290357-27334244_2	chr17:26676135:rs13469:T:C	-5.54438	0.84517	0.440256	Exon|	gene;var:POLDIP2|	17:26676135:T:C:POLDIP2|
chr17:21290357-27334244_1	chr17:26678960:rs2073867:C:G	-5.5535	0.353387	0.43686		gene;var:POLDIP2|
chr19:44744108-46102697_1	chr19:45411941:rs429358:C:T	-13.6377	1	1	Exon|peak|	gene;var:APOE|
chr19:44744108-46102697_2	chr19:45416178:rs483082:T:G	-7.42242	0.0113225	0.499183	CRE|DAR|peak|	gene;var:APOC1|cre:BCAM|cre:APOE|cre:CBLC|cre:NECTIN2|cre:APOC1|cre:CLPTM1|
chr19:44744108-46102697_2	chr19:45416741:rs438811:T:C	-7.42474	0.0751073	0.491999	Promoter|	gene;var:APOC1|
chr19:44744108-46102697_2	chr19:45418790:rs5117:C:T	-7.30708	0.0725766	0.336253	Promoter|	gene;var:APOC1|
chr19:5811852-6684885_2	chr19:6683622:rs11569547:T:C	6.36602	0.999998	0.999999		gene;var:TNFSF14|
chr19:610729-2098396_2	chr19:1026318:rs10422209:G:C	5.55793	0.428192	0.805828	Promoter|	gene;var:CNN2|	19:1026318:G:C:CNN2|
chr19:610729-2098396_1	chr19:1031438:rs67538026:T:C	-5.56778	0.768241	0.735228	peak|	gene;var:CNN2|
chr19:610729-2098396_2	chr19:1038289:rs3087680:C:A	5.46728	0.923026	0.734698	3_UTR|DAR|peak|	gene;var:ABCA7|
chr19:610729-2098396_1	chr19:1031550:rs113772652:T:C	-5.45746	0.623333	0.587197	peak|	gene;var:CNN2|
chr19:6684885-8347513_2	chr19:6716279:rs11569415:A:G	17.2929	1	1		gene;var:C3|
chr19:6684885-8347513_1	chr19:6718387:rs2230199:C:G	-17.5759	1	1	Exon|peak|	gene;var:C3|
chr20:42680176-44839056_1	chr20:44632367:rs6065912:A:G	-6.22914	0.433487	0.611164		gene;var:MMP9|
chr20:42680176-44839056_1	chr20:44623967:rs1888235:T:C	-6.33137	0.764047	0.598392	peak|	gene;var:MMP9|
chr20:42680176-44839056_1	chr20:44630653:rs6073984:G:A	-6.27935	0.401157	0.576264		gene;var:MMP9|
chr20:42680176-44839056_1	chr20:44635735:rs3918241:A:T	-6.2479	0.390255	0.562754		gene;var:MMP9|
chr20:42680176-44839056_1	chr20:44635976:rs3918242:T:C	-6.23913	0.388079	0.560294		gene;var:MMP9|
chr20:42680176-44839056_1	chr20:44639692:rs2274755:T:G	-6.1316	0.36722	0.536208		gene;var:MMP9|
chr20:42680176-44839056_1	chr20:44640575:rs2236416:G:A	-6.11247	0.695313	0.532767	peak|	gene;var:MMP9|
chr20:42680176-44839056_1	chr20:44643592:rs3918261:G:A	-6.10625	0.364141	0.532731		gene;var:MMP9|
chr20:42680176-44839056_1	chr20:44643111:rs17577:A:G	-6.10162	0.853889	0.531938	Exon|CRE|DAR|peak|	gene;var:MMP9|cre:WFDC3|cre:ZSWIM1|cre:NCOA5|
chr20:42680176-44839056_1	chr20:44650318:rs10432735:T:A	-6.08024	0.258453	0.528491	Promoter|CRE|peak|	gene;var:SLC12A5|cre:WFDC3|cre:ZSWIM1|cre:CD40|cre:NCOA5|
chr20:42680176-44839056_1	chr20:44645593:rs3918271:A:G	-6.07891	0.360601	0.528288		gene;var:SLC12A5|
chr20:42680176-44839056_1	chr20:44645339:rs3918270:A:G	-6.07628	0.360287	0.52789		gene;var:SLC12A5|
chr20:42680176-44839056_1	chr20:44644965:rs13925:A:G	-6.06373	0.849105	0.526063	Exon|	gene;var:SLC12A5|
chr20:56447959-58406572_10	chr20:56584276:rs77125533:G:C	-6.78387	0.268645	0.303799		gene;var:NA|
chr20:56447959-58406572_10	chr20:56585036:rs6092587:G:A	-6.7174	0.260441	0.294049		gene;var:NA|
chr20:56447959-58406572_10	chr20:56645200:rs57619911:T:G	-7.55496	0.193834	0.239428		gene;var:C20orf85|
chr20:56447959-58406572_10	chr20:56655147:rs117441184:A:G	-8.15437	0.190644	0.225695		gene;var:C20orf85|
chr20:56447959-58406572_10	chr20:56652781:rs117739907:T:A	-8.16516	0.19676	0.224458		gene;var:C20orf85|
chr20:56447959-58406572_10	chr20:56653111:rs140611615:C:T	-8.1611	0.195112	0.223055		gene;var:C20orf85|
chr20:56447959-58406572_10	chr20:56653122:rs145616409:A:G	-8.15965	0.194537	0.222562		gene;var:C20orf85|
chr20:56447959-58406572_10	chr20:56651542:rs7266392:G:A	-8.15334	0.192097	0.220454		gene;var:C20orf85|
chr20:56447959-58406572_10	chr20:56654978:rs74468975:T:G	-8.15198	0.191585	0.220008		gene;var:C20orf85|
chr20:56447959-58406572_10	chr20:56651310:rs7266321:T:C	-8.15064	0.422336	0.219569	peak|	gene;var:C20orf85|
chr20:56447959-58406572_10	chr20:56655625:rs34559944:C:T	-8.13294	0.183407	0.21865		gene;var:C20orf85|
chr20:56447959-58406572_10	chr20:56650604:rs141945849:A:G	-8.1435	0.416524	0.217751	peak|	gene;var:C20orf85|
chr20:56447959-58406572_10	chr20:56650019:rs77280782:T:C	-8.1079	0.00373911	0.207467	DAR|peak|	gene;var:C20orf85|
chr20:56447959-58406572_10	chr20:56659939:rs78727216:C:T	-8.03419	0.166152	0.201008		gene;var:C20orf85|
chr20:56447959-58406572_10	chr20:56648114:rs4625977:A:G	-6.36681	0.201131	0.197888		gene;var:C20orf85|
chr20:56447959-58406572_10	chr20:56659429:rs117022982:T:C	-8.04521	0.165793	0.197039		gene;var:C20orf85|
chr20:56447959-58406572_10	chr20:56591367:rs6092588:T:C	-6.6303	0.168384	0.192811		gene;var:NA|
chr20:56447959-58406572_10	chr20:56632192:rs8125204:T:C	-7.22832	0.165131	0.192674		gene;var:C20orf85|
chr20:56447959-58406572_9	chr20:56660359:rs78257941:A:G	-8.0197	0.362972	0.191779	peak|	gene;var:C20orf85|
chr20:56447959-58406572_10	chr20:56668368:rs76592054:G:C	-7.92508	0.153242	0.189253		gene;var:C20orf85|
chr20:56447959-58406572_10	chr20:56634106:rs74446810:A:G	-7.15172	0.160707	0.186529		gene;var:C20orf85|
chr20:56447959-58406572_10	chr20:56642592:rs8121142:T:C	-7.15108	0.160652	0.186457		gene;var:C20orf85|
chr20:56447959-58406572_10	chr20:56641928:rs60113574:G:A	-7.15012	0.16057	0.186349		gene;var:C20orf85|
chr20:56447959-58406572_9	chr20:56664535:rs137926706:A:G	-7.96897	0.153971	0.186041		gene;var:C20orf85|
chr20:56447959-58406572_10	chr20:56650729:rs915042:G:T	-6.48471	0.414005	0.185579	peak|	gene;var:C20orf85|
chr20:56447959-58406572_10	chr20:56666165:rs6099921:T:C	-7.94968	0.153911	0.184817		gene;var:C20orf85|
chr20:56447959-58406572_10	chr20:56649659:rs78230701:T:A	-7.98371	0.00321561	0.182975	DAR|peak|	gene;var:C20orf85|
chr20:56447959-58406572_10	chr20:56649534:rs6092601:A:G	-7.98284	0.153853	0.182845		gene;var:C20orf85|
chr20:56447959-58406572_10	chr20:56649497:rs6092600:T:C	-7.98198	0.153759	0.182716		gene;var:C20orf85|
chr20:56447959-58406572_10	chr20:56667588:rs79057200:A:C	-7.93412	0.152296	0.18241		gene;var:C20orf85|
chr20:56447959-58406572_10	chr20:56649270:rs6092599:T:C	-7.97944	0.153485	0.182337		gene;var:C20orf85|
chr20:56447959-58406572_10	chr20:56662709:rs118013387:T:C	-7.96221	0.347843	0.181985	peak|	gene;var:C20orf85|
chr20:56447959-58406572_10	chr20:56663846:rs117420707:A:C	-7.95101	0.152576	0.180368		gene;var:C20orf85|
chr20:56447959-58406572_10	chr20:56668141:rs117692416:A:T	-7.91767	0.150786	0.180049		gene;var:C20orf85|
chr20:56447959-58406572_10	chr20:56629244:rs61267550:C:T	-7.07265	0.154488	0.178315		gene;var:C20orf85|
chr20:56447959-58406572_10	chr20:56656419:rs6015187:T:G	-5.70404	0.168515	0.173592		gene;var:C20orf85|
chr20:56447959-58406572_10	chr20:56650279:rs16981665:C:G	-6.58141	0.326832	0.166276	peak|	gene;var:C20orf85|
chr20:56447959-58406572_10	chr20:56591605:rs6099884:T:A	-6.27219	0.143532	0.162062		gene;var:NA|
chr20:56447959-58406572_10	chr20:56618975:rs6099900:T:G	-5.91946	0.324352	0.160421	peak|	gene;var:C20orf85|
chr20:56447959-58406572_10	chr20:56615697:rs16981631:T:C	-6.04223	0.0029513	0.160283	DAR|peak|	gene;var:C20orf85|
chr20:56447959-58406572_10	chr20:56655159:rs6026016:T:A	-6.53932	0.139316	0.159704		gene;var:C20orf85|
chr20:56447959-58406572_10	chr20:56655297:rs1334108:C:T	-6.53385	0.13922	0.159475		gene;var:C20orf85|
chr20:56447959-58406572_10	chr20:56655360:rs1334109:G:T	-6.53199	0.139188	0.159398		gene;var:C20orf85|
chr20:56447959-58406572_10	chr20:56658128:rs6026022:A:G	-6.43192	0.138829	0.158388		gene;var:C20orf85|
chr20:56447959-58406572_10	chr20:56627259:rs117889306:A:T	-7.15204	0.147804	0.158355		gene;var:C20orf85|
chr20:56447959-58406572_10	chr20:56641761:rs78734365:A:G	-7.182	0.14635	0.157558		gene;var:C20orf85|
chr20:56447959-58406572_10	chr20:56674034:rs874430:G:A	-6.1634	0.137936	0.15465		gene;var:C20orf85|
chr22:32664986-34494914_1	chr22:33105817:rs5754227:C:T	-10.2597	0.796875	0.833245		gene;var:TIMP3|
chr22:32664986-34494914_2	chr22:33104058:rs5754223:C:T	-8.98922	0.541283	0.356097	peak|	gene;var:TIMP3|
chr22:32664986-34494914_2	chr22:33074351:rs5754206:T:C	-9.14744	0.227562	0.315452		gene;var:TIMP3|
chr22:32664986-34494914_1	chr22:33091812:rs7289865:C:A	-10.1221	0.216411	0.26189		gene;var:TIMP3|
chr22:32664986-34494914_2	chr22:33104103:rs5754224:T:C	-9.12266	0.430374	0.258077	peak|	gene;var:TIMP3|
chr22:32664986-34494914_2	chr22:33104168:rs5754225:C:G	-9.09544	0.415149	0.248509	peak|	gene;var:TIMP3|
chr22:32664986-34494914_2	chr22:33103455:rs5754221:C:T	-9.14379	0.181768	0.238119		gene;var:TIMP3|
chr22:32664986-34494914_2	chr22:33106947:rs5749498:T:G	-9.17371	0.194987	0.234932		gene;var:TIMP3|
chr22:32664986-34494914_2	chr22:33097419:rs74406464:G:A	-9.09672	0.1717	0.221563		gene;var:TIMP3|
chr22:32664986-34494914_2	chr22:33117736:rs9619302:C:A	-9.14166	0.17649	0.215566		gene;var:TIMP3|
chr22:32664986-34494914_2	chr22:33105227:rs756481:G:A	-9.2117	0.160152	0.194249		gene;var:TIMP3|
chr22:32664986-34494914_2	chr22:33111247:rs12170368:T:C	-9.09498	0.159592	0.192981		gene;var:TIMP3|
chr22:32664986-34494914_1	chr22:33103968:rs5754222:C:T	-9.96046	0.363928	0.19288	peak|	gene;var:TIMP3|
chr3:63669286-65273538_10	chr3:64715155:rs62247658:T:C	7.66632	0.343058	0.330697		gene;var:MIR548A2|
chr3:63669286-65273538_10	chr3:64710850:rs7428936:C:T	7.66488	0.342096	0.329747		gene;var:MIR548A2|
chr3:63669286-65273538_10	chr3:64714182:rs17727064:A:G	7.6579	0.340224	0.327888		gene;var:MIR548A2|
chr3:63669286-65273538_10	chr3:64719091:rs6445425:C:G	7.65521	0.335374	0.323205		gene;var:MIR548A2|
chr3:63669286-65273538_10	chr3:64722611:rs13096392:T:G	7.55652	0.289698	0.278111		gene;var:MIR548A2|
chr3:63669286-65273538_10	chr3:64705365:rs6795735:T:C	7.55683	0.203897	0.277304	Promoter|	gene;var:MIR548A2|
chr3:63669286-65273538_10	chr3:64730121:rs17676309:C:T	7.49129	0.287375	0.276099		gene;var:MIR548A2|
chr3:63669286-65273538_10	chr3:64724632:rs6775974:T:C	7.51994	0.283792	0.272415		gene;var:MIR548A2|
chr3:63669286-65273538_10	chr3:64710253:rs918466:A:G	7.37207	0.255328	0.244422		gene;var:MIR548A2|
chr3:63669286-65273538_10	chr3:64707269:rs9311910:A:G	7.36739	0.254397	0.243503		gene;var:MIR548A2|
chr3:63669286-65273538_10	chr3:64708600:rs9870517:C:A	7.3121	0.24516	0.234455		gene;var:MIR548A2|
chr3:63669286-65273538_10	chr3:64720023:rs4688508:C:T	7.31159	0.245085	0.234381		gene;var:MIR548A2|
chr3:63669286-65273538_9	chr3:64722045:rs12108088:A:G	7.28033	0.241583	0.23093		gene;var:MIR548A2|
chr3:63669286-65273538_10	chr3:64723072:rs7638565:G:A	7.23692	0.239916	0.229255		gene;var:MIR548A2|
chr3:63669286-65273538_10	chr3:64704891:rs9864077:C:T	6.45672	0.168278	0.228555	Promoter|	gene;var:MIR548A2|
chr3:63669286-65273538_10	chr3:64704860:rs4422297:G:A	6.45531	0.168182	0.228432	Promoter|	gene;var:MIR548A2|
chr3:63669286-65273538_10	chr3:64699445:rs4611812:T:C	7.26214	0.233716	0.223041		gene;var:MIR548A2|
chr3:63669286-65273538_10	chr3:64729892:rs7638389:A:G	5.58627	0.232792	0.221631		gene;var:MIR548A2|
chr3:63669286-65273538_10	chr3:64701387:rs4368494:A:G	6.32575	0.232803	0.221393		gene;var:MIR548A2|
chr3:63669286-65273538_10	chr3:64718258:rs2371767:C:G	6.00699	0.232107	0.221028		gene;var:MIR548A2|
chr3:63669286-65273538_10	chr3:64703394:rs66815886:T:G	6.00785	0.231886	0.22077		gene;var:MIR548A2|
chr3:63669286-65273538_10	chr3:64704322:rs67311847:A:G	5.69276	0.231971	0.220747		gene;var:MIR548A2|
chr3:63669286-65273538_10	chr3:64725485:rs2194091:A:G	5.66738	0.231659	0.220558		gene;var:MIR548A2|
chr3:63669286-65273538_10	chr3:64717575:rs6445424:A:C	5.65705	0.231338	0.220175		gene;var:MIR548A2|
chr3:63669286-65273538_10	chr3:64729712:rs6793651:A:G	5.56914	0.230097	0.219054		gene;var:MIR548A2|
chr3:63669286-65273538_10	chr3:64705181:rs6770866:G:A	5.67462	0.160154	0.218235	Promoter|	gene;var:MIR548A2|
chr3:63669286-65273538_10	chr3:64702275:rs4616635:G:C	5.96677	0.229079	0.218133		gene;var:MIR548A2|
chr3:63669286-65273538_10	chr3:64701146:rs9860730:G:A	6.28072	0.229185	0.21799		gene;var:MIR548A2|
chr3:63669286-65273538_10	chr3:64700799:rs9860221:G:A	6.27573	0.228894	0.217719		gene;var:MIR548A2|
chr3:63669286-65273538_10	chr3:64701890:rs4504165:C:T	6.26661	0.228378	0.217237		gene;var:MIR548A2|
chr3:63669286-65273538_10	chr3:64711904:rs4607103:T:C	5.63604	0.228278	0.217229		gene;var:MIR548A2|
chr3:63669286-65273538_10	chr3:64705108:rs67701463:T:C	5.65264	0.159068	0.216815	Promoter|	gene;var:MIR548A2|
chr3:63669286-65273538_10	chr3:64701436:rs4615073:T:C	5.56577	0.226683	0.215769		gene;var:MIR548A2|
chr3:63669286-65273538_10	chr3:64700425:rs6772129:G:A	6.21114	0.224599	0.213743		gene;var:MIR548A2|
chr3:63669286-65273538_10	chr3:64708114:rs4132228:T:C	5.97577	0.221872	0.21129		gene;var:MIR548A2|
chr3:63669286-65273538_10	chr3:64706499:rs9870322:C:T	6.02039	0.154497	0.210986	Promoter|peak|	gene;var:MIR548A2|
chr3:63669286-65273538_10	chr3:64706820:rs9816778:G:A	6.00958	0.221373	0.210845		gene;var:MIR548A2|
chr3:98215950-99373762_1	chr3:99180668:rs140647181:C:T	6.76211	0.793021	0.793021		gene;var:COL8A1|
chr3:98215950-99373762_1	chr3:99201587:rs17826006:G:A	6.67104	0.66647	0.66647		gene;var:COL8A1|
chr3:98215950-99373762_1	chr3:99245919:rs116675086:A:T	6.68495	0.645504	0.645504		gene;var:COL8A1|
chr3:98215950-99373762_1	chr3:99051114:rs17823383:G:A	5.56644	0.630625	0.630625		gene;var:COL8A1|
chr3:98215950-99373762_1	chr3:99268860:rs115407994:A:G	6.70897	0.586992	0.586992		gene;var:COL8A1|
chr3:98215950-99373762_1	chr3:99347410:rs17776773:C:G	6.43807	0.58246	0.58246		gene;var:COL8A1|
chr3:98215950-99373762_1	chr3:99320824:rs114191043:C:G	6.47016	0.574608	0.574608		gene;var:COL8A1|
chr3:98215950-99373762_1	chr3:99295938:rs115760848:G:C	6.5093	0.552179	0.552179		gene;var:COL8A1|
chr3:98215950-99373762_1	chr3:99301357:rs115486367:T:C	6.50615	0.551595	0.551595		gene;var:COL8A1|
chr3:98215950-99373762_1	chr3:99291489:rs114148032:C:T	6.50098	0.550644	0.550644		gene;var:COL8A1|
chr3:98215950-99373762_1	chr3:99342207:rs17833244:C:T	6.47047	0.545264	0.545264		gene;var:COL8A1|
chr3:99373762-100592217_4	chr3:99466531:rs56339461:G:A	-5.95822	0.908044	0.904769		gene;var:COL8A1|
chr3:99373762-100592217_2	chr3:99491751:rs78245803:A:G	5.64623	0.812466	0.613449	peak|	gene;var:COL8A1|
chr3:99373762-100592217_2	chr3:99483298:rs141338168:T:C	5.58702	0.26896	0.460115		gene;var:COL8A1|
chr3:99373762-100592217_3	chr3:99570761:rs7626245:C:G	5.61114	0.146793	0.169617		gene;var:FILIP1L|
chr3:99373762-100592217_3	chr3:99640716:rs6791889:C:A	5.55041	0.138684	0.160891		gene;var:MIR3921|
chr3:99373762-100592217_3	chr3:99621726:rs13100490:G:A	5.56982	0.137509	0.159377		gene;var:FILIP1L|
chr3:99373762-100592217_3	chr3:99632259:rs13096116:C:T	5.56846	0.137041	0.158855		gene;var:FILIP1L|
chr3:99373762-100592217_3	chr3:99652024:rs34174004:T:C	5.54085	0.135421	0.157235		gene;var:MIR3921|
chr3:99373762-100592217_3	chr3:99585125:rs13097830:A:T	5.58256	0.123558	0.144296		gene;var:FILIP1L|
chr3:99373762-100592217_3	chr3:99592716:rs35098023:G:A	5.57821	0.288075	0.142934	peak|	gene;var:FILIP1L|
chr3:99373762-100592217_3	chr3:99603697:rs13063594:T:C	5.56982	0.282947	0.140378	peak|	gene;var:FILIP1L|
chr3:99373762-100592217_3	chr3:99604167:rs13095282:C:T	5.56982	0.12009	0.140378		gene;var:FILIP1L|
chr3:99373762-100592217_4	chr3:99584630:rs13320057:T:G	-5.52795	0.118882	0.138219		gene;var:FILIP1L|
chr3:99373762-100592217_3	chr3:99634854:rs34571898:A:G	5.55226	0.115627	0.13533		gene;var:FILIP1L|
chr3:99373762-100592217_3	chr3:99635193:rs13082013:C:T	5.55226	0.00234831	0.13533	DAR|peak|	gene;var:FILIP1L|
chr3:99373762-100592217_3	chr3:99697401:rs13089461:G:A	5.45893	0.114768	0.134298		gene;var:MIR3921|
chr3:99373762-100592217_3	chr3:99678943:rs62283538:T:C	5.49352	0.101298	0.119066		gene;var:MIR3921|
chr4:108815348-111256567_1	chr4:110659067:rs10033900:C:T	8.37873	0.961914	0.964339		gene;var:PLA2G12A|
chr4:108815348-111256567_3	chr4:110600996:rs75852942:T:C	-5.49898	0.361249	0.366914		gene;var:CASP6|
chr4:108815348-111256567_3	chr4:110600997:rs79540995:G:A	-5.49898	0.361249	0.366914		gene;var:CASP6|
chr4:108815348-111256567_3	chr4:110600992:rs34176512:C:G	-5.49944	0.340984	0.346818		gene;var:CASP6|
chr4:108815348-111256567_4	chr4:110569592:rs726583:T:A	-6.21477	0.251423	0.258209		gene;var:CASP6|
chr4:108815348-111256567_4	chr4:110570095:rs9996730:T:G	-6.21386	0.226719	0.233763		gene;var:CASP6|
chr4:108815348-111256567_4	chr4:110570180:rs9996648:A:C	-6.21234	0.191814	0.199216		gene;var:CASP6|
chr4:108815348-111256567_4	chr4:110570619:rs1029450:A:C	-6.20966	0.144521	0.152393		gene;var:CASP6|
chr4:108815348-111256567_2	chr4:110564530:rs34925690:T:G	-7.36139	0.100324	0.136885		gene;var:CASP6|
chr4:108815348-111256567_4	chr4:110570966:rs1029451:G:A	-6.20848	0.128458	0.136484		gene;var:CASP6|
chr4:108815348-111256567_2	chr4:110567181:rs35838666:T:C	-7.35706	0.0977549	0.133293		gene;var:CASP6|
chr4:108815348-111256567_4	chr4:110567798:rs10010159:G:A	-6.20673	0.108724	0.116934		gene;var:CASP6|
chr4:108815348-111256567_2	chr4:110579003:rs3756256:A:C	-7.31944	0.0791182	0.107198		gene;var:CASP6|
chr4:108815348-111256567_2	chr4:110575040:rs76120516:A:C	-7.3152	0.0773764	0.104755		gene;var:CASP6|
chr4:108815348-111256567_2	chr4:110579493:rs12511995:G:A	-7.31313	0.186389	0.103594	peak|	gene;var:CASP6|
chr4:108815348-111256567_2	chr4:110580985:rs11098039:T:C	-7.30177	0.0722762	0.097598		gene;var:CASP6|
chr4:108815348-111256567_2	chr4:110581363:rs4698744:A:T	-7.29804	0.261691	0.0957495	Exon|	gene;var:CASP6|
chr4:108815348-111256567_2	chr4:110579836:rs2107051:G:T	-7.2953	0.170711	0.0944331	peak|	gene;var:CASP6|
chr4:108815348-111256567_4	chr4:110568711:rs9990765:T:C	-6.20385	0.0846864	0.0931105		gene;var:CASP6|
chr4:108815348-111256567_2	chr4:110580916:rs12646055:T:C	-7.28868	0.0678492	0.0913788		gene;var:CASP6|
chr4:108815348-111256567_2	chr4:110581012:rs11098040:T:C	-7.2857	0.0669101	0.0900586		gene;var:CASP6|
chr4:108815348-111256567_2	chr4:110582425:rs12647060:T:C	-7.28155	0.065643	0.0882768		gene;var:CASP6|
chr4:108815348-111256567_2	chr4:110579786:rs2107050:T:C	-7.24993	0.151342	0.0833641	peak|	gene;var:CASP6|
chr4:108815348-111256567_4	chr4:110569091:rs9993532:A:G	-6.20158	0.0711977	0.0797343		gene;var:CASP6|
chr4:108815348-111256567_2	chr4:110590557:rs59207576:T:C	-7.22612	0.0524694	0.0697051		gene;var:CASP6|
chr4:108815348-111256567_2	chr4:110593600:rs28850086:T:A	-7.21841	0.0510923	0.0677569		gene;var:CASP6|
chr4:108815348-111256567_2	chr4:110593460:rs13103167:C:A	-7.21815	0.0510477	0.0676938		gene;var:CASP6|
chr4:108815348-111256567_2	chr4:110591274:rs28892996:A:G	-7.203	0.0486039	0.064232		gene;var:CASP6|
chr4:108815348-111256567_2	chr4:110600024:rs116436004:T:C	-7.203	0.0486039	0.064232		gene;var:CASP6|
chr4:108815348-111256567_2	chr4:110588957:rs763370:T:C	-7.1581	0.0451191	0.0594567		gene;var:CASP6|
chr4:108815348-111256567_2	chr4:110600568:rs4698747:A:G	-7.13902	0.0430022	0.0564326		gene;var:CASP6|
chr4:108815348-111256567_2	chr4:110590821:rs4698776:A:G	-7.13051	0.0421654	0.0552343		gene;var:CASP6|
chr6:28917608-29737971_1	chr6:29606794:rs3131857:C:T	-5.73765	0.999964	0.999964		gene;var:GABBR1|
chr6:28917608-29737971_2	chr6:29713080:rs28359996:T:C	-5.52419	0.696706	0.696706		gene;var:HLA-F-AS1|
chr6:28917608-29737971_2	chr6:29699863:rs28359995:G:A	-5.48307	0.636827	0.636827		gene;var:HLA-F|
chr6:29737971-30798168_1	chr6:30782205:rs886423:C:G	5.82128	1	1	Exon|DAR|peak|	gene;var:DDR1|
chr6:29737971-30798168_2	chr6:30789647:rs1264352:C:G	-5.92254	1	1		gene;var:DDR1|
chr6:30798168-31571218_2	chr6:31112602:rs1265078:C:G	-5.6331	1	1	Exon|	gene;var:PSORS1C2|
chr6:30798168-31571218_1	chr6:31109946:rs2523834:A:T	5.66503	0.96875	0.96875		gene;var:PSORS1C2|
chr6:30798168-31571218_1	chr6:31109947:rs2523833:T:C	5.66503	0.96875	0.96875		gene;var:PSORS1C2|
chr6:31571218-32682664_2	chr6:31902289:rs635348:G:C	16.7088	1	1	3_UTR|	gene;var:C2|
chr6:31571218-32682664_1	chr6:31904306:rs488755:A:G	-17.0859	1	1	Promoter|	gene;var:C2|
chr6:32682664-33236497_5	chr6:33125742:rs9296088:G:A	-5.96015	0.742554	0.794385		gene;var:COL11A2|
chr6:32682664-33236497_2	chr6:32799157:rs28724897:G:A	5.53569	0.628132	0.702162		gene;var:TAP2|
chr6:32682664-33236497_4	chr6:32683011:rs3873446:G:A	-5.96542	0.616065	0.687125		gene;var:HLA-DQA2|
chr6:32682664-33236497_4	chr6:32683012:rs3873447:A:G	-5.96476	0.61453	0.685872		gene;var:HLA-DQA2|
chr6:32682664-33236497_2	chr6:32803408:rs28724898:A:T	5.47807	0.509284	0.612892		gene;var:TAP2|
chr6:32682664-33236497_3	chr6:32800221:rs2856992:T:C	-5.74357	0.82874	0.579662	Exon|	gene;var:TAP2|
chr6:32682664-33236497_3	chr6:32790641:rs139345337:C:T	-5.46192	0.346859	0.560081		gene;var:HLA-DOB|
chr6:32682664-33236497_5	chr6:33110901:rs79249189:G:C	-5.68217	0.375496	0.490469		gene;var:HLA-DPB2|
chr6:32682664-33236497_2	chr6:32741844:rs28724890:A:G	5.46496	0.353002	0.479437		gene;var:HLA-DQB2|
chr6:32682664-33236497_3	chr6:32798243:rs241435:A:G	-5.54438	0.306577	0.472734		gene;var:TAP2|
chr6:32682664-33236497_5	chr6:33101064:rs4434456:C:G	-5.55102	0.350802	0.464222		gene;var:HLA-DPB2|
chr6:32682664-33236497_3	chr6:32823948:rs241419:A:G	-5.46306	0.752224	0.448343	Exon|	gene;var:PSMB9|
chr6:32682664-33236497_3	chr6:32827356:rs241418:A:G	-5.45418	0.75001	0.445938	3_UTR|	gene;var:PSMB9|
chr6:33236497-35455756_1	chr6:33580403:rs140650994:C:G	-5.58853	0.741599	0.741599		gene;var:ITPR3|
chr6:33236497-35455756_1	chr6:33559706:rs418453:A:G	-5.56246	0.721327	0.721327		gene;var:LINC00336|
chr6:33236497-35455756_1	chr6:33565100:rs115542012:C:T	-5.48477	0.642853	0.642853		gene;var:LINC00336|
chr7:104159525-105682905_6	chr7:104756326:rs1142:T:C	6.06133	0.214644	0.322566		gene;var:KMT2E|
chr7:104159525-105682905_6	chr7:104756355:rs1144:C:T	6.0578	0.214043	0.32205		gene;var:KMT2E|
chr7:104159525-105682905_6	chr7:104761741:rs2003506:G:A	5.83129	0.176077	0.270634		gene;var:SRPK2|
chr7:104159525-105682905_6	chr7:104771857:rs2299304:C:T	5.78619	0.378006	0.261197	peak|	gene;var:SRPK2|
chr7:104159525-105682905_6	chr7:104653265:rs2192932:G:A	5.75353	0.514577	0.253679	Exon|	gene;var:KMT2E-AS1|
chr7:104159525-105682905_6	chr7:104643230:rs3213742:A:C	5.74339	0.161659	0.252106		gene;var:KMT2E-AS1|
chr7:104159525-105682905_6	chr7:104664879:rs6948885:T:C	5.73124	0.1599	0.249156		gene;var:KMT2E|
chr7:104159525-105682905_6	chr7:104662862:rs4727618:A:G	5.75333	0.34535	0.247807	peak|	gene;var:KMT2E|
chr7:104159525-105682905_6	chr7:104624626:rs3823752:T:C	5.713	0.503929	0.247579	Exon|CRE|peak|	gene;var:LINC01004|cre:LHFPL3-AS2|cre:LHFPL3-AS1|
chr7:104159525-105682905_6	chr7:104770386:rs6950620:A:G	5.68871	0.159109	0.247395		gene;var:SRPK2|
chr7:104159525-105682905_6	chr7:104741842:rs10953468:T:A	5.6771	0.108175	0.244551	Promoter|	gene;var:KMT2E|
chr7:104159525-105682905_6	chr7:104649037:rs111595825:G:A	5.75353	0.149953	0.244163		gene;var:KMT2E-AS1|
chr7:104159525-105682905_6	chr7:104646178:rs12705296:G:A	5.74838	0.339452	0.243461	peak|	gene;var:KMT2E-AS1|
chr7:104159525-105682905_6	chr7:104769415:rs7797912:C:T	5.67217	0.156123	0.243319		gene;var:SRPK2|
chr7:104159525-105682905_6	chr7:104646899:rs6466035:T:C	5.75065	0.339384	0.243318	peak|	gene;var:KMT2E-AS1|
chr7:104159525-105682905_6	chr7:104652671:rs6950894:A:G	5.74857	0.481159	0.243038	Exon|	gene;var:KMT2E-AS1|
chr7:104159525-105682905_6	chr7:104643470:rs11978288:T:C	5.74212	0.149339	0.243015		gene;var:KMT2E-AS1|
chr7:104159525-105682905_6	chr7:104711711:rs11760317:C:T	5.66738	0.15452	0.24166		gene;var:KMT2E|
chr7:104159525-105682905_6	chr7:104641241:rs12534212:G:C	5.7326	0.336832	0.241356	peak|	gene;var:LINC01004|
chr7:104159525-105682905_6	chr7:104639583:rs6947388:C:G	5.72904	0.336252	0.24089	peak|	gene;var:LINC01004|
chr7:104159525-105682905_6	chr7:104744041:rs6967587:T:C	5.66503	0.153811	0.240486		gene;var:KMT2E|
chr7:104159525-105682905_6	chr7:104636940:rs6980244:C:T	5.72571	0.147454	0.240031		gene;var:LINC01004|
chr7:104159525-105682905_6	chr7:104632980:rs6976394:G:A	5.71454	0.146788	0.239032		gene;var:LINC01004|
chr7:104159525-105682905_6	chr7:104626690:rs888086:A:G	5.713	0.474424	0.238838	Exon|peak|	gene;var:LINC01004|
chr7:104159525-105682905_6	chr7:104715490:rs10808141:G:T	5.62735	0.104218	0.236866	Promoter|	gene;var:KMT2E|
chr7:104159525-105682905_6	chr7:104721374:rs6963395:C:T	5.68346	0.331911	0.236838	peak|	gene;var:KMT2E|
chr7:104159525-105682905_6	chr7:104671659:rs10263499:G:T	5.68871	0.330046	0.235125	peak|	gene;var:KMT2E|
chr7:104159525-105682905_6	chr7:104681649:rs9918494:A:T	5.67339	0.0997301	0.234993	Promoter|peak|	gene;var:KMT2E|
chr7:104159525-105682905_6	chr7:104673462:rs11981882:C:T	5.68738	0.14477	0.234969		gene;var:KMT2E|
chr7:104159525-105682905_6	chr7:104725105:rs2097942:A:G	5.62178	0.141634	0.229703		gene;var:KMT2E|
chr7:104159525-105682905_6	chr7:104691505:rs10228174:T:C	5.61374	0.141115	0.228867		gene;var:KMT2E|
chr7:104159525-105682905_6	chr7:104692291:rs10247691:C:T	5.60773	0.140733	0.228252		gene;var:KMT2E|
chr7:104159525-105682905_6	chr7:104694071:rs10252714:G:T	5.60689	0.321519	0.228167	peak|	gene;var:KMT2E|
chr7:104159525-105682905_6	chr7:104731338:rs7784126:A:T	5.60438	0.140087	0.227615		gene;var:KMT2E|
chr7:104159525-105682905_1	chr7:104698848:rs1029596:G:C	5.5833	0.13893	0.225472		gene;var:KMT2E|
chr7:98715474-100196651_10	chr7:99956436:rs11771799:C:T	5.82504	0.0596568	0.1154	Promoter|	gene;var:PILRB|	7:99956436:C:T:PILRB|
chr7:98715474-100196651_10	chr7:99956439:rs35986051:C:T	5.82504	0.0596568	0.1154	Promoter|	gene;var:PILRB|	7:99956439:C:T:PILRB|
chr7:98715474-100196651_10	chr7:100098296:rs6974286:T:C	5.79285	0.122908	0.0690359	peak|	gene;var:NYAP1|
chr7:98715474-100196651_10	chr7:100098295:rs6974282:T:C	5.78273	0.122044	0.0685397	peak|	gene;var:NYAP1|
chr7:98715474-100196651_10	chr7:99976703:rs1964242:A:G	5.78925	0.0494548	0.0682451		gene;var:PILRA|
chr7:98715474-100196651_10	chr7:99991548:rs7803454:T:C	5.85535	0.049827	0.0682216		gene;var:ZCWPW1|
chr7:98715474-100196651_10	chr7:99973402:rs6965458:A:G	5.78204	0.120221	0.0679036	peak|	gene;var:PILRA|
chr7:98715474-100196651_10	chr7:100080013:rs6972167:T:G	5.71609	0.120025	0.0673053	peak|	gene;var:NYAP1|
chr7:98715474-100196651_10	chr7:99998607:rs11769886:A:G	5.82888	0.181328	0.0670001	3_UTR|peak|	gene;var:ZCWPW1|	7:99998607:A:G:ZCWPW1|
chr7:98715474-100196651_10	chr7:99987805:rs7783550:T:C	5.82769	0.0488796	0.0669468		gene;var:PILRA|
chr7:98715474-100196651_10	chr7:99988403:rs11771419:G:A	5.8268	0.0488502	0.0669072		gene;var:PILRA|
chr7:98715474-100196651_10	chr7:100083078:rs67040465:A:G	5.78273	0.00488882	0.0667059	CRE|DAR|peak|	gene;var:NYAP1|cre:C7orf61|cre:PCOLCE-AS1|cre:TSC22D4|	7:100083078:A:G:TSC22D4|
chr7:98715474-100196651_10	chr7:100000274:rs35111986:A:C	5.82185	0.0486872	0.0666879		gene;var:ZCWPW1|
chr7:98715474-100196651_10	chr7:100017454:rs7783159:A:G	5.80207	0.0329401	0.0665269	Promoter|	gene;var:ZCWPW1|	7:100017454:A:G:ZCWPW1|
chr7:98715474-100196651_10	chr7:99937942:rs11766917:G:A	5.66156	0.0480565	0.066308		gene;var:PMS2P1|
chr7:98715474-100196651_10	chr7:100095349:rs6948699:G:C	5.74801	0.0483315	0.0662792		gene;var:NYAP1|
chr7:98715474-100196651_10	chr7:99937941:rs7797025:G:A	5.64941	0.0480394	0.0662365		gene;var:PMS2P1|
chr7:98715474-100196651_10	chr7:100095664:rs6953107:T:C	5.71766	0.0482884	0.0662116		gene;var:NYAP1|
chr7:98715474-100196651_10	chr7:100091215:rs73405353:A:G	5.74578	0.00484446	0.066183	CRE|DAR|peak|	gene;var:NYAP1|cre:SPDYE3|cre:PILRA|cre:TFR2|	7:100091215:A:G:PILRA|
chr7:98715474-100196651_10	chr7:100090049:rs11769700:C:T	5.73175	0.0481929	0.0660944		gene;var:NYAP1|
chr7:98715474-100196651_10	chr7:99979564:rs112386097:G:C	5.73924	0.047823	0.0659903		gene;var:PILRA|
chr7:98715474-100196651_10	chr7:100096742:rs60644673:T:G	5.74085	0.0481045	0.0659727		gene;var:NYAP1|
chr7:98715474-100196651_10	chr7:99994785:rs11771241:A:G	5.80131	0.0480309	0.0658051		gene;var:ZCWPW1|
chr7:98715474-100196651_10	chr7:100068936:rs7794485:C:T	5.78045	0.117405	0.0657949	peak|	gene;var:C7orf61|
chr7:98715474-100196651_10	chr7:100089385:rs7787825:G:A	5.72407	0.117257	0.0657688	peak|	gene;var:NYAP1|
chr7:98715474-100196651_10	chr7:99965285:rs705866:C:T	5.7309	0.176646	0.065639	3_UTR|	gene;var:PILRA|	7:99965285:C:T:PILRA|
chr7:98715474-100196651_10	chr7:100089860:rs6979335:C:T	5.72084	0.0478517	0.0656334		gene;var:NYAP1|
chr7:98715474-100196651_10	chr7:99977582:rs73401443:G:T	5.71924	0.0475477	0.0655644		gene;var:PILRA|
chr7:98715474-100196651_10	chr7:99964789:rs11765869:G:T	5.72904	0.116219	0.0655617	peak|	gene;var:PILRA|
chr7:98715474-100196651_10	chr7:99974968:rs6975563:A:G	5.72904	0.0475129	0.0655617		gene;var:PILRA|
chr7:98715474-100196651_10	chr7:100053690:rs2406255:C:T	5.7825	0.047825	0.0655304		gene;var:C7orf61|
chr7:98715474-100196651_10	chr7:99973351:rs6965207:T:C	5.72737	0.116101	0.0654925	peak|	gene;var:PILRA|
chr7:98715474-100196651_10	chr7:100078754:rs11760536:T:C	5.77446	0.0477436	0.0654454		gene;var:TSC22D4|
chr7:98715474-100196651_10	chr7:99952828:rs76798830:T:C	5.7055	0.17591	0.0653747	Exon|peak|	gene;var:PILRB|	7:99952828:T:C:PILRB|
chr7:98715474-100196651_10	chr7:99975266:rs6975660:G:A	5.71454	0.0474069	0.0653703		gene;var:PILRA|
chr7:98715474-100196651_10	chr7:100049742:rs111493473:G:A	5.77037	0.0476939	0.0653117		gene;var:C7orf61|
chr7:98715474-100196651_10	chr7:100089234:rs7787620:G:A	5.72407	0.047587	0.0652737		gene;var:NYAP1|
chr7:98715474-100196651_10	chr7:99981775:rs6945952:G:A	5.72084	0.115642	0.0652246	peak|	gene;var:PILRA|
chr7:98715474-100196651_10	chr7:99981859:rs73401450:C:G	5.71924	0.115532	0.0651598	peak|	gene;var:PILRA|
chr7:98715474-100196651_10	chr7:100089017:rs60478351:T:C	5.72084	0.0474896	0.0651422		gene;var:NYAP1|
chr7:98715474-100196651_10	chr7:100065443:rs7811142:T:A	5.77294	0.0475348	0.06514		gene;var:C7orf61|
chr7:98715474-100196651_10	chr7:99981895:rs73401451:C:T	5.71766	0.115422	0.0650959	peak|	gene;var:PILRA|
chr7:98715474-100196651_10	chr7:99972122:rs7792525:G:A	5.71609	0.175122	0.0650327	Exon|	gene;var:PILRA|	7:99972122:G:A:PILRA|
chr7:98715474-100196651_10	chr7:100088640:rs2897358:G:C	5.71766	0.176041	0.065014	Exon|	gene;var:NYAP1|
chr7:98715474-100196651_10	chr7:100078226:rs4463351:A:G	5.74121	0.11582	0.0648682	peak|	gene;var:TSC22D4|
chr7:98715474-100196651_10	chr7:99980104:rs2108269:C:T	5.70115	0.000932747	0.0648292	DAR|peak|	gene;var:PILRA|
chr7:98715474-100196651_10	chr7:100077273:rs2406253:G:A	5.73942	0.032064	0.0647971	Promoter|	gene;var:TSC22D4|	7:100077273:G:A:TSC22D4|
chr7:98715474-100196651_10	chr7:100076614:rs11559117:G:A	5.73853	0.0320462	0.0647619	Promoter|	gene;var:TSC22D4|	7:100076614:G:A:TSC22D4|
chr7:98715474-100196651_10	chr7:99954393:rs6946768:A:G	5.70846	0.174356	0.0647285	5_UTR|	gene;var:PILRB|	7:99954393:A:G:PILRB|
chr7:98715474-100196651_10	chr7:99972403:rs7792959:T:C	5.69831	0.114847	0.0647166	peak|	gene;var:PILRA|
chr7:98715474-100196651_10	chr7:100004577:rs3900792:C:G	5.77229	0.0471566	0.0646296		gene;var:ZCWPW1|
chr7:98715474-100196651_10	chr7:100081186:rs113459328:A:G	5.74689	0.0319737	0.0646173	Promoter|	gene;var:NYAP1|
chr7:98715474-100196651_10	chr7:100005720:rs2003507:T:C	5.76994	0.0470883	0.0645378		gene;var:ZCWPW1|
chr7:98715474-100196651_10	chr7:100039815:rs11761725:T:C	5.76804	0.0470334	0.064464		gene;var:PPP1R35|
chr7:98715474-100196651_10	chr7:100009985:rs67471932:G:C	5.76574	0.0469674	0.0643753		gene;var:ZCWPW1|
chr7:98715474-100196651_10	chr7:100009994:rs73161759:C:T	5.76574	0.0469674	0.0643753		gene;var:ZCWPW1|
chr7:98715474-100196651_10	chr7:100069088:rs111972532:C:T	5.74302	0.114766	0.0642928	peak|	gene;var:C7orf61|
chr7:98715474-100196651_10	chr7:100000941:rs6953749:T:C	5.76103	0.0468334	0.0641952		gene;var:ZCWPW1|
chr7:98715474-100196651_10	chr7:100002772:rs76913697:G:A	5.75983	0.0467993	0.0641494		gene;var:ZCWPW1|
chr7:98715474-100196651_10	chr7:99947657:rs75636500:G:C	5.69276	0.0464699	0.06412		gene;var:PILRB|
chr7:98715474-100196651_10	chr7:99935097:rs3873746:A:G	5.66503	0.0465014	0.0641166		gene;var:PMS2P1|
chr7:98715474-100196651_10	chr7:100097895:rs34989573:T:C	5.67961	0.114291	0.0640976	peak|	gene;var:NYAP1|
chr7:98715474-100196651_10	chr7:100004543:rs1000215:C:T	5.75141	0.0467872	0.0640939		gene;var:ZCWPW1|
chr7:98715474-100196651_10	chr7:99946385:rs113979344:G:C	5.6914	0.0464326	0.0640684		gene;var:PILRB|
chr7:98715474-100196651_10	chr7:100014313:rs6957928:A:G	5.75685	0.0316708	0.0640367	Promoter|	gene;var:ZCWPW1|	7:100014313:A:G:ZCWPW1|
chr7:98715474-100196651_10	chr7:100073292:rs11766752:G:A	5.71924	0.114322	0.0640171	peak|	gene;var:TSC22D4|
chr7:98715474-100196651_10	chr7:100099466:rs4385401:C:T	5.6771	0.0466273	0.0640023		gene;var:NYAP1|
chr7:98715474-100196651_10	chr7:100014846:rs73161762:T:C	5.71766	0.0316432	0.0640022	Promoter|	gene;var:ZCWPW1|	7:100014846:T:C:ZCWPW1|
chr7:98715474-100196651_10	chr7:100006493:rs68116612:A:G	5.7482	0.0316581	0.0639727	Promoter|	gene;var:ZCWPW1|	7:100006493:A:G:ZCWPW1|
chr7:98715474-100196651_10	chr7:99934192:rs190448056:C:T	5.68871	0.0314276	0.0639669	Promoter|peak|	gene;var:PMS2P1|	7:99934192:C:T:PMS2P1|
chr7:98715474-100196651_10	chr7:100015124:rs67315960:G:A	5.75276	0.031593	0.0638835	Promoter|	gene;var:ZCWPW1|	7:100015124:G:A:ZCWPW1|
chr7:98715474-100196651_10	chr7:100098680:rs6978739:G:C	5.67339	0.11388	0.0638628	peak|	gene;var:NYAP1|
chr7:98715474-100196651_10	chr7:99970188:rs6948685:T:C	5.68738	0.0313817	0.0638569	Promoter|DAR|peak|	gene;var:PILRA|	7:99970188:T:C:PILRA|
chr7:98715474-100196651_10	chr7:99983135:rs10085549:T:C	5.67217	0.0462074	0.0637165		gene;var:PILRA|
chr7:98715474-100196651_10	chr7:100080474:rs60844404:T:A	5.72245	0.113746	0.0636887	peak|	gene;var:NYAP1|
chr7:98715474-100196651_10	chr7:100074020:rs66958101:A:G	5.72904	0.00465714	0.0636767	CRE|peak|	gene;var:TSC22D4|cre:GNB2|
chr7:98715474-100196651_10	chr7:99967737:rs11768933:T:C	5.67961	0.0461142	0.0636282		gene;var:PILRA|
chr7:98715474-100196651_10	chr7:99894971:rs142473518:G:A	5.66042	0.0460858	0.0635838		gene;var:SPDYE3|
chr7:98715474-100196651_10	chr7:100045885:rs6967277:G:A	5.72407	0.0463616	0.0635252		gene;var:PPP1R35|
chr7:98715474-100196651_10	chr7:100016844:rs11763414:G:C	5.74284	0.0314075	0.0635185	Promoter|	gene;var:ZCWPW1|	7:100016844:G:C:ZCWPW1|
chr7:98715474-100196651_10	chr7:100081944:rs11763511:A:G	5.71609	0.0313833	0.0634564	Promoter|CRE|peak|	gene;var:NYAP1|cre:PCOLCE|cre:NYAP1|cre:TFR2|cre:ACTL6B|cre:ZCWPW1|cre:SPDYE3|cre:PILRA|cre:GIGYF1|	7:100081944:A:G:ZCWPW1|7:100081944:A:G:PILRA|
chr7:98715474-100196651_10	chr7:99967644:rs11768967:A:G	5.66503	0.0460172	0.0634543		gene;var:PILRA|
chr7:98715474-100196651_10	chr7:100018904:rs66632384:A:G	5.73996	0.0462519	0.063414		gene;var:ZCWPW1|
chr7:98715474-100196651_10	chr7:100081306:rs113738841:T:C	5.713	0.0313264	0.0633447	Promoter|CRE|DAR|peak|	gene;var:NYAP1|cre:GNB2|cre:PCOLCE-AS1|cre:PCOLCE|cre:NYAP1|cre:TFR2|cre:C7orf61|cre:ACTL6B|cre:ZCWPW1|cre:SPDYE3|cre:MOSPD3|cre:PILRA|cre:GIGYF1|cre:AGFG2|	7:100081306:T:C:ZCWPW1|7:100081306:T:C:PILRA|
chr7:98715474-100196651_10	chr7:100056220:rs6975514:C:T	5.738	0.0461995	0.0633436		gene;var:C7orf61|
chr7:98715474-100196651_10	chr7:100056166:rs6955362:T:C	5.73783	0.0461948	0.0633372		gene;var:C7orf61|
chr7:98715474-100196651_10	chr7:99964661:rs11769057:G:A	5.67096	0.0458864	0.0633132		gene;var:PILRA|
chr7:98715474-100196651_10	chr7:100044754:rs28578163:G:A	5.71924	0.0461262	0.0632285		gene;var:PPP1R35|
chr7:98715474-100196651_10	chr7:100043055:rs11764818:A:G	5.72245	0.0461079	0.0632222		gene;var:PPP1R35|
chr7:98715474-100196651_10	chr7:100073069:rs11773661:C:G	5.72571	0.0460874	0.0632007		gene;var:TSC22D4|
chr7:98715474-100196651_10	chr7:99934453:rs182703269:A:G	5.61816	0.0310378	0.0631516	Promoter|peak|	gene;var:PMS2P1|	7:99934453:A:G:PMS2P1|
chr7:98715474-100196651_10	chr7:99962096:rs77861211:C:T	5.66503	0.0457332	0.0631013		gene;var:PILRB|
chr7:98715474-100196651_10	chr7:100046504:rs67239991:G:A	5.71148	0.0460245	0.0630736		gene;var:PPP1R35|
chr7:98715474-100196651_10	chr7:100021679:rs6970828:G:A	5.72904	0.0459625	0.0630254		gene;var:ZCWPW1|
chr7:98715474-100196651_10	chr7:100021618:rs6970806:C:A	5.72737	0.0459189	0.0629668		gene;var:ZCWPW1|
chr7:98715474-100196651_10	chr7:99961194:rs6955367:G:A	5.65048	0.0456403	0.0629345		gene;var:PILRB|
chr7:98715474-100196651_10	chr7:100024153:rs73403312:C:T	5.72407	0.112244	0.062852	peak|	gene;var:ZCWPW1|
chr7:98715474-100196651_10	chr7:100044551:rs28629346:C:T	5.70404	0.0458304	0.0628137		gene;var:PPP1R35|
chr7:98715474-100196651_10	chr7:100023838:rs67163493:T:C	5.72245	0.0457916	0.0627958		gene;var:ZCWPW1|
chr7:98715474-100196651_10	chr7:100016354:rs111757992:C:A	5.71454	0.0457931	0.0627621		gene;var:ZCWPW1|
chr7:98715474-100196651_10	chr7:100037690:rs111265471:C:T	5.72084	0.112047	0.0627404	peak|	gene;var:PPP1R35|
chr7:98715474-100196651_10	chr7:99956893:rs11761426:T:A	5.65373	0.0454476	0.0627063		gene;var:PILRB|
chr7:98715474-100196651_10	chr7:100038945:rs7800667:T:C	5.71924	0.0457095	0.0626856		gene;var:PPP1R35|
chr7:98715474-100196651_10	chr7:99950408:rs7795805:G:A	5.62735	0.0308177	0.0626546	Promoter|	gene;var:PILRB|	7:99950408:G:A:PILRB|
chr7:98715474-100196651_10	chr7:99950427:rs7799894:T:G	5.62735	0.0308177	0.0626546	Promoter|	gene;var:PILRB|	7:99950427:T:G:PILRB|
chr7:98715474-100196651_10	chr7:100070758:rs4472444:C:T	5.70259	0.0456969	0.0626405		gene;var:TSC22D4|
chr7:98715474-100196651_10	chr7:100043173:rs112317829:G:A	5.69831	0.0456834	0.0626168		gene;var:PPP1R35|
chr7:98715474-100196651_10	chr7:99955364:rs3087502:A:G	5.65048	0.0307502	0.0625947	Promoter|peak|	gene;var:PILRB|	7:99955364:A:G:PILRB|
chr7:98715474-100196651_10	chr7:99955866:rs61735533:A:G	5.65048	0.0307502	0.0625947	Promoter|	gene;var:PILRB|	7:99955866:A:G:PILRB|
chr7:98715474-100196651_10	chr7:100072767:rs1962269:T:C	5.70115	0.0456603	0.0625915		gene;var:TSC22D4|
chr7:98715474-100196651_10	chr7:100026780:rs60257855:C:G	5.70115	0.0309163	0.0625737	Promoter|CRE|peak|	gene;var:ZCWPW1|cre:SAP25|	7:100026780:C:G:ZCWPW1|
chr7:98715474-100196651_10	chr7:99954457:rs41280971:T:G	5.64941	0.168883	0.0625581	5_UTR|	gene;var:PILRB|	7:99954457:T:G:PILRB|
chr7:98715474-100196651_10	chr7:99937803:rs113261079:G:A	5.6302	0.0453332	0.0625563		gene;var:PMS2P1|
chr7:98715474-100196651_10	chr7:100072031:rs7809801:C:T	5.69831	0.169749	0.0624951	Exon|	gene;var:TSC22D4|	7:100072031:C:T:TSC22D4|
chr7:98715474-100196651_10	chr7:99952970:rs78256546:G:A	5.64623	0.0452625	0.0624504		gene;var:PILRB|
chr7:98715474-100196651_10	chr7:100032288:rs4989959:C:T	5.71148	0.111486	0.0624224	peak|	gene;var:PPP1R35|
chr7:98715474-100196651_10	chr7:100020982:rs28490152:A:G	5.70404	0.0455265	0.0624052		gene;var:ZCWPW1|
chr7:98715474-100196651_10	chr7:99950297:rs7795656:T:A	5.64415	0.0306443	0.0623801	Promoter|	gene;var:PILRB|	7:99950297:T:A:PILRB|
chr7:98715474-100196651_10	chr7:99951315:rs7341507:G:A	5.64415	0.110771	0.0623801	peak|	gene;var:PILRB|
chr7:98715474-100196651_10	chr7:100032665:rs4074838:A:G	5.70996	0.0454757	0.0623718		gene;var:PPP1R35|
chr7:98715474-100196651_10	chr7:99950508:rs7799932:C:G	5.64107	0.0305934	0.0622769	Promoter|	gene;var:PILRB|	7:99950508:C:G:PILRB|
chr7:98715474-100196651_10	chr7:100031612:rs1073:A:G	5.70698	0.169096	0.0622723	3_UTR|peak|	gene;var:PPP1R35|
chr7:98715474-100196651_10	chr7:100039970:rs11761784:T:C	5.69973	0.045419	0.0622613		gene;var:PPP1R35|
chr7:98715474-100196651_10	chr7:100027339:rs74460138:G:C	5.70115	0.0306764	0.0620807	Promoter|peak|	gene;var:MEPCE|	7:100027339:G:C:MEPCE|
chr7:98715474-100196651_10	chr7:99947897:rs77370288:T:A	5.63213	0.0449241	0.0619822		gene;var:PILRB|
chr7:98715474-100196651_8	chr7:100028187:rs6975729:T:C	5.69691	0.0306063	0.0619428	Promoter|	gene;var:MEPCE|	7:100028187:T:C:MEPCE|
chr7:98715474-100196651_10	chr7:99937481:rs112345649:G:A	5.62925	0.0448564	0.0618887		gene;var:PMS2P1|
chr7:98715474-100196651_10	chr7:99950450:rs7799901:A:G	5.61906	0.030413	0.0618759	Promoter|	gene;var:PILRB|	7:99950450:A:G:PILRB|
chr7:98715474-100196651_10	chr7:99943583:rs28495773:T:A	5.57258	0.166959	0.0618176	Exon|	gene;var:PILRB|	7:99943583:T:A:PILRB|
chr7:98715474-100196651_10	chr7:99934008:rs7786844:G:T	5.61638	0.0303703	0.0617896	Promoter|peak|	gene;var:PMS2P1|	7:99934008:G:T:PMS2P1|
chr7:98715474-100196651_8	chr7:100031758:rs67483801:T:G	5.68346	0.0450244	0.0617333		gene;var:PPP1R35|
chr7:98715474-100196651_8	chr7:100025564:rs67196635:C:T	5.68088	0.030475	0.061652	Promoter|peak|	gene;var:ZCWPW1|	7:100025564:C:T:ZCWPW1|
chr7:98715474-100196651_8	chr7:100028484:rs6962151:C:T	5.67096	0.166757	0.0613432	5_UTR|peak|	gene;var:MEPCE|	7:100028484:C:T:MEPCE|
chr7:98715474-100196651_8	chr7:99906300:rs111689538:T:C	5.55102	0.0300405	0.0611851	Promoter|	gene;var:SPDYE3|
chr7:98715474-100196651_8	chr7:99943283:rs11771936:G:A	5.58183	0.10835	0.0609714	peak|	gene;var:PILRB|
chr7:98715474-100196651_8	chr7:99936427:rs3991564:C:T	5.59314	0.164374	0.0607763	Exon|	gene;var:PMS2P1|	7:99936427:C:T:PMS2P1|
chr7:98715474-100196651_10	chr7:99901602:rs3958484:C:T	5.5833	0.0438469	0.0604918		gene;var:SPDYE3|
chr7:98715474-100196651_10	chr7:99939321:rs11761253:T:C	5.5833	0.0438469	0.0604918		gene;var:PMS2P1|
chr7:98715474-100196651_10	chr7:99940630:rs6979910:C:A	5.57327	0.0438634	0.0604837		gene;var:PMS2P1|
chr7:98715474-100196651_10	chr7:99938864:rs1636980:A:G	5.58183	0.0438167	0.06045		gene;var:PMS2P1|
chr7:98715474-100196651_10	chr7:100023308:rs28660238:T:C	5.62641	0.0437696	0.0600572		gene;var:ZCWPW1|
chr7:98715474-100196651_10	chr7:99912929:rs148853830:T:A	5.55226	0.0432353	0.0596453		gene;var:SPDYE3|
chr7:98715474-100196651_10	chr7:99930447:rs1063945:T:C	5.53854	0.0291234	0.0592952	Promoter|	gene;var:PMS2P1|	7:99930447:T:C:PMS2P1|
chr7:98715474-100196651_10	chr7:99917416:rs112622797:A:G	5.46458	0.158279	0.0583895	Exon|	gene;var:SPDYE3|
chr7:98715474-100196651_10	chr7:99913146:rs113387325:T:G	5.45274	0.0421682	0.058178		gene;var:SPDYE3|
chr7:98715474-100196651_10	chr7:99905475:rs28680963:G:C	5.4793	0.0284593	0.0579463	Promoter|	gene;var:SPDYE3|
chr7:98715474-100196651_10	chr7:99905684:rs28401739:G:A	5.4708	0.0284281	0.0578719	Promoter|	gene;var:SPDYE3|
chr7:98715474-100196651_10	chr7:99904969:rs3991498:G:A	5.46689	0.0283362	0.0576961	Promoter|	gene;var:SPDYE3|
chr7:98715474-100196651_10	chr7:99905325:rs111312383:T:C	5.46612	0.0283287	0.0576809	Promoter|	gene;var:SPDYE3|
chr7:98715474-100196651_10	chr7:99895309:rs111344110:G:C	5.45893	0.0417165	0.0575415		gene;var:SPDYE3|
chr7:98715474-100196651_10	chr7:99897475:rs147248866:T:C	5.45746	0.0416962	0.0575133		gene;var:SPDYE3|
chr8:22897057-24674718_2	chr8:23082971:rs13278062:T:G	-6.5866	0.987332	0.991718	Promoter|	gene;var:LOC389641|
chr8:22897057-24674718_2	chr8:23088984:rs11777697:G:C	-5.75314	0.661842	0.584671		gene;var:LOC389641|
chr8:22897057-24674718_2	chr8:23083836:rs13254617:A:C	-5.73607	0.657405	0.580193		gene;var:LOC389641|
chr8:22897057-24674718_2	chr8:23083546:rs13255394:C:T	-5.73209	0.49155	0.579107	Promoter|	gene;var:LOC389641|
chr9:101592859-104624437_8	chr9:101864510:rs10819635:T:A	-6.24979	0.228568	0.252152		gene;var:TGFBR1|
chr9:101592859-104624437_8	chr9:101864607:rs10760667:A:C	-6.2453	0.227287	0.250829		gene;var:TGFBR1|
chr9:101592859-104624437_8	chr9:101923372:rs1626340:A:G	-6.26121	0.20902	0.233508		gene;var:TGFBR1|
chr9:101592859-104624437_8	chr9:101925077:rs401186:T:C	-6.2517	0.450007	0.231215	peak|	gene;var:TGFBR1|
chr9:101592859-104624437_8	chr9:101924993:rs367568:C:G	-6.24866	0.206173	0.230494		gene;var:TGFBR1|
chr9:101592859-104624437_8	chr9:101873532:rs7031302:G:A	-6.21025	0.196895	0.219741		gene;var:TGFBR1|
chr9:101592859-104624437_8	chr9:101869278:rs6478972:A:G	-6.20644	0.0210998	0.21939	CRE|peak|	gene;var:TGFBR1|cre:TGFBR1|
chr9:101592859-104624437_8	chr9:101869789:rs7031309:A:G	-6.20615	0.196626	0.219331		gene;var:TGFBR1|
chr9:101592859-104624437_8	chr9:101872163:rs10760670:A:G	-6.2013	0.020926	0.21795	CRE|DAR|peak|	gene;var:TGFBR1|cre:TGFBR1|
chr9:101592859-104624437_8	chr9:101879263:rs2026811:A:C	-6.18149	0.421438	0.214162	peak|	gene;var:TGFBR1|
chr9:101592859-104624437_8	chr9:101883749:rs1571589:A:G	-6.16141	0.00400953	0.210918	DAR|peak|	gene;var:TGFBR1|
chr9:101592859-104624437_8	chr9:101930249:rs44466:G:C	-6.0913	0.185482	0.209714		gene;var:TGFBR1|
chr9:101592859-104624437_8	chr9:101909286:rs334355:A:G	-6.12656	0.182765	0.204823		gene;var:TGFBR1|
chr9:101592859-104624437_8	chr9:101862688:rs13286149:T:G	-5.88966	0.174362	0.197555		gene;var:TGFBR1|
chr9:101592859-104624437_8	chr9:101864098:rs12346650:A:G	-5.89797	0.172209	0.193805		gene;var:TGFBR1|
chr9:101592859-104624437_6	chr9:101882199:rs10739779:A:C	-5.93105	0.165558	0.187932		gene;var:TGFBR1|
chr9:101592859-104624437_7	chr9:101860776:rs10988703:T:C	-5.9115	0.165107	0.187367		gene;var:TGFBR1|
chr9:101592859-104624437_8	chr9:101860076:rs10819634:T:C	-5.82592	0.165577	0.186762		gene;var:TGFBR1|
chr9:101592859-104624437_8	chr9:101873465:rs10819637:A:C	-5.91844	0.16453	0.186746		gene;var:TGFBR1|
chr9:101592859-104624437_8	chr9:101914873:rs420549:C:G	-5.90671	0.517515	0.186338	3_UTR|	gene;var:TGFBR1|
chr9:101592859-104624437_8	chr9:101868075:rs10760668:G:A	-5.92048	0.112473	0.183803	Promoter|peak|	gene;var:TGFBR1|
chr9:101592859-104624437_8	chr9:101883808:rs1571590:G:A	-5.8773	0.1613	0.182819		gene;var:TGFBR1|
chr9:101592859-104624437_8	chr9:101923565:rs1699413:C:T	-5.90252	0.161432	0.182615		gene;var:TGFBR1|
chr9:101592859-104624437_8	chr9:101911656:rs868:G:A	-5.86212	0.50981	0.182349	3_UTR|	gene;var:TGFBR1|
chr9:101592859-104624437_8	chr9:101926594:rs334362:A:G	-5.88544	0.160758	0.181721		gene;var:TGFBR1|
chr9:101592859-104624437_8	chr9:101869281:rs6478973:G:A	-5.88337	0.0168844	0.180804	CRE|peak|	gene;var:TGFBR1|cre:TGFBR1|
chr9:101592859-104624437_8	chr9:101870302:rs10988706:C:T	-5.88011	0.0168634	0.180602	CRE|peak|	gene;var:TGFBR1|cre:TGFBR1|
chr9:101592859-104624437_8	chr9:101869068:rs7874221:C:T	-5.8781	0.159778	0.18048		gene;var:TGFBR1|
chr9:101592859-104624437_8	chr9:101869961:rs10760669:G:C	-5.87494	0.0168308	0.180289	CRE|peak|	gene;var:TGFBR1|cre:TGFBR1|
chr9:101592859-104624437_8	chr9:101872674:rs10760671:A:G	-5.87533	0.359396	0.180178	peak|	gene;var:TGFBR1|
chr9:101592859-104624437_8	chr9:101884880:rs10988714:T:C	-5.83937	0.158888	0.180049		gene;var:TGFBR1|
chr9:101592859-104624437_8	chr9:101884337:rs1013186:T:C	-5.83873	0.158855	0.18001		gene;var:TGFBR1|
chr9:101592859-104624437_8	chr9:101878622:rs10760673:A:G	-5.86139	0.0167951	0.179983	CRE|peak|	gene;var:TGFBR1|cre:TGFBR1|
chr9:101592859-104624437_8	chr9:101874314:rs10819638:T:C	-5.86067	0.357912	0.179349	peak|	gene;var:TGFBR1|
chr9:101592859-104624437_8	chr9:101883028:rs7043624:C:G	-5.76533	0.158797	0.179321		gene;var:TGFBR1|
chr9:101592859-104624437_8	chr9:101920599:rs334350:T:C	-5.81928	0.158078	0.179234		gene;var:TGFBR1|
chr9:101592859-104624437_8	chr9:101873407:rs10760672:T:C	-5.83684	0.158056	0.178627		gene;var:TGFBR1|
chr9:101592859-104624437_8	chr9:101922412:rs385057:T:C	-5.81127	0.157528	0.178447		gene;var:TGFBR1|
chr9:101592859-104624437_8	chr9:101922279:rs789675:A:G	-5.8102	0.355471	0.178391	peak|	gene;var:TGFBR1|
chr9:101592859-104624437_8	chr9:101905643:rs10283455:T:G	-5.80233	0.15714	0.177988		gene;var:TGFBR1|
chr9:101592859-104624437_8	chr9:101909753:rs334357:T:A	-5.79481	0.156831	0.177619		gene;var:TGFBR1|
chr9:101592859-104624437_8	chr9:101909372:rs334356:T:C	-5.79432	0.156811	0.177596		gene;var:TGFBR1|
chr9:101592859-104624437_8	chr9:101910613:rs334358:T:G	-5.79407	0.156801	0.177584		gene;var:TGFBR1|
chr9:101592859-104624437_8	chr9:101886816:rs10988716:G:A	-5.81648	0.156893	0.177321		gene;var:TGFBR1|
chr9:101592859-104624437_8	chr9:101917790:rs597457:A:C	-5.80105	0.156355	0.176811		gene;var:TGFBR1|
chr9:101592859-104624437_8	chr9:101908915:rs334354:A:G	-5.79803	0.156167	0.176535		gene;var:TGFBR1|
chr9:101592859-104624437_8	chr9:101902346:rs10733709:A:G	-5.74449	0.154792	0.175014		gene;var:TGFBR1|
chr9:76203946-76973081_3	chr9:76503064:rs10781159:T:C	-5.66387	0.373206	0.430411		gene;var:RORB|
chr9:76203946-76973081_3	chr9:76593011:rs10781177:T:C	-5.6662	0.331502	0.390676		gene;var:RORB|
chr9:76203946-76973081_3	chr9:76600134:rs11143745:T:C	-5.64941	0.326055	0.384186		gene;var:RORB|
chr9:76203946-76973081_3	chr9:76622068:rs11143754:A:C	-5.59159	0.623457	0.368867	peak|	gene;var:RORB|
chr9:76203946-76973081_3	chr9:76617720:rs10781182:G:T	5.95568	0.229152	0.253875		gene;var:RORB|
chr9:76203946-76973081_3	chr9:76615662:rs10781180:T:C	5.95505	0.229057	0.253772		gene;var:RORB|
chr9:76203946-76973081_3	chr9:76618077:rs11143753:C:T	5.94233	0.22715	0.251717		gene;var:RORB|
chr9:76203946-76973081_3	chr9:76615780:rs10781181:C:A	5.94117	0.226978	0.251531		gene;var:RORB|
chr9:76203946-76973081_3	chr9:76614862:rs985034:A:T	5.93887	0.226638	0.251166		gene;var:RORB|
chr9:76203946-76973081_3	chr9:76615432:rs10735630:A:G	5.93887	0.226638	0.251166		gene;var:RORB|
chr9:76203946-76973081_3	chr9:76614550:rs985032:T:C	5.91494	0.2232	0.247459		gene;var:RORB|
chr9:76203946-76973081_3	chr9:76625716:rs1388360:A:G	5.89797	0.220858	0.244936		gene;var:RORB|
chr9:76203946-76973081_3	chr9:76592874:rs10781176:G:A	5.89094	0.218321	0.242497		gene;var:RORB|
chr9:76203946-76973081_3	chr9:76588328:rs10746934:T:C	5.88669	0.217769	0.241899		gene;var:RORB|
chr9:76203946-76973081_3	chr9:76565484:rs10781171:A:C	5.85817	0.217499	0.241645		gene;var:RORB|
chr9:76203946-76973081_3	chr9:76564465:rs4014108:T:C	5.85711	0.214118	0.237978		gene;var:RORB|
chr9:76203946-76973081_3	chr9:76555517:rs10781168:C:T	5.84388	0.212529	0.236259		gene;var:RORB|
chr9:76203946-76973081_3	chr9:76546716:rs1379915:T:C	5.69005	0.211392	0.234224		gene;var:RORB|
chr9:76203946-76973081_3	chr9:76553709:rs11143733:G:T	5.82185	0.210497	0.23412		gene;var:RORB|
chr9:76203946-76973081_3	chr9:76584416:rs10781174:T:G	5.82445	0.21022	0.233732		gene;var:RORB|
chr9:76203946-76973081_3	chr9:76583896:rs7023062:T:C	5.82387	0.210154	0.23366		gene;var:RORB|
chr9:76203946-76973081_3	chr9:76574007:rs10781172:A:G	5.80543	0.451748	0.231532	peak|	gene;var:RORB|
chr9:76203946-76973081_3	chr9:76535756:rs1379914:C:T	5.63704	0.196906	0.219015		gene;var:RORB|
chr9:76203946-76973081_3	chr9:76528962:rs10781160:C:A	5.6227	0.196429	0.218439		gene;var:RORB|
chr9:76203946-76973081_3	chr9:76519640:rs1379908:T:C	5.63213	0.196184	0.218202		gene;var:RORB|
chr9:76203946-76973081_3	chr9:76537890:rs10746929:C:T	5.63116	0.196106	0.21812		gene;var:RORB|
chr9:76203946-76973081_3	chr9:76531239:rs10746928:C:A	5.61996	0.428547	0.217549	peak|	gene;var:RORB|
chr9:76203946-76973081_3	chr9:76537737:rs10781164:C:T	5.62362	0.195507	0.217482		gene;var:RORB|
chr9:76203946-76973081_3	chr9:76523676:rs10869294:A:G	5.6155	0.194876	0.21681		gene;var:RORB|
chr9:76203946-76973081_3	chr9:76515398:rs11143724:C:T	5.59628	0.194362	0.21624		gene;var:RORB|
chr9:76203946-76973081_3	chr9:76512888:rs10117508:G:C	5.55793	0.191614	0.213325		gene;var:RORB|
chr9:76203946-76973081_3	chr9:76500498:rs10781158:C:T	5.51189	0.188702	0.210249		gene;var:RORB|
chr9:76203946-76973081_3	chr9:76496757:rs10123612:G:A	5.48997	0.187459	0.208941		gene;var:RORB|
chr9:76203946-76973081_3	chr9:76497305:rs11143719:T:C	5.48953	0.187222	0.208666		gene;var:RORB|

## Sheet: Hysi Myopia refraction error
LD block	GWAS variant	Z score	functional PIP	uniform PIP	genomic annotation	linked or nearby gene	overlapped eQTL
chr10:100668400-102949239_1	chr10:102812719:rs811068:A:G	7.5063	0.349578	0.986341	peak|	gene;var:KAZALD1|
chr10:100668400-102949239_4	chr10:102095069:rs10883461:T:C	-5.55232	0.57397	0.601446		gene;var:PKD2L1|
chr10:100668400-102949239_4	chr10:102097006:rs12261282:T:G	-5.45698	0.428667	0.432625		gene;var:PKD2L1|
chr10:100668400-102949239_2	chr10:102648860:rs1408345:A:G	7.05072	0.108202	0.198384		gene;var:SLF2|
chr10:100668400-102949239_3	chr10:102633091:rs10883552:C:G	-6.00001	0.103639	0.163549		gene;var:SLF2|
chr10:100668400-102949239_3	chr10:102633551:rs11190733:T:C	-6.04159	0.385465	0.135168	DAR|peak|	gene;var:SLF2|
chr10:100668400-102949239_3	chr10:102632622:rs7902564:A:G	-5.98417	0.0921929	0.134929		gene;var:SLF2|
chr10:100668400-102949239_3	chr10:102630000:rs912476:T:G	-5.85931	0.0557663	0.132578		gene;var:SLF2|
chr10:100668400-102949239_2	chr10:102633779:rs80325284:C:G	7.02374	0.374233	0.131223	DAR|peak|	gene;var:SLF2|
chr10:100668400-102949239_3	chr10:102631263:rs10883549:A:G	-5.82153	0.0549984	0.126599		gene;var:SLF2|
chr10:100668400-102949239_2	chr10:102697376:rs73336293:T:G	6.6675	0.0840766	0.104633		gene;var:SLF2|
chr10:100668400-102949239_2	chr10:102741669:rs111783512:T:G	6.86857	0.0656632	0.09922		gene;var:MRPL43|
chr10:100668400-102949239_2	chr10:102677376:rs11190752:T:C	6.67753	0.0750615	0.0988543		gene;var:SLF2|
chr10:100668400-102949239_2	chr10:102701412:rs73336294:A:G	6.66744	0.0729195	0.0957489		gene;var:SLF2|
chr10:100668400-102949239_2	chr10:102699360:rs113470732:A:G	6.67693	0.068205	0.0951717		gene;var:SLF2|
chr10:100668400-102949239_3	chr10:102626578:rs4917915:T:C	-5.91799	0.299041	0.0949662	DAR|peak|	gene;var:SLF2|
chr10:100668400-102949239_2	chr10:102745321:rs11190781:A:T	6.85415	0.369571	0.0948408	3_UTR|	gene;var:MRPL43|
chr10:100668400-102949239_3	chr10:102626047:rs4919505:C:G	-5.70921	0.0845311	0.094229	peak|	gene;var:SLF2|
chr10:100668400-102949239_2	chr10:102664649:rs11190747:T:C	6.66109	0.0716264	0.0938791		gene;var:SLF2|
chr10:100668400-102949239_3	chr10:102633284:rs11190732:C:G	-5.93264	0.0612899	0.0935252		gene;var:SLF2|
chr10:100668400-102949239_3	chr10:102628737:rs2863071:A:G	-5.90082	0.0626557	0.0910437		gene;var:SLF2|
chr10:100668400-102949239_2	chr10:102673842:rs73336283:T:C	6.72155	0.111904	0.0879024	peak|	gene;var:SLF2|
chr10:100668400-102949239_3	chr10:102627011:rs9919402:T:C	-5.91764	0.0597668	0.086437		gene;var:SLF2|
chr10:100668400-102949239_3	chr10:102629868:rs10736151:A:G	-5.69565	0.045217	0.0859679		gene;var:SLF2|
chr10:100668400-102949239_2	chr10:102649525:rs11190739:T:G	6.65651	0.108572	0.0836012	peak|	gene;var:SLF2|
chr10:100668400-102949239_2	chr10:102642195:rs74154232:T:G	6.51372	0.064218	0.083234		gene;var:SLF2|
chr10:100668400-102949239_3	chr10:102632291:rs7898809:T:C	-5.83075	0.260008	0.0767827	DAR|peak|	gene;var:SLF2|
chr10:100668400-102949239_2	chr10:102646602:rs11190737:A:G	6.62413	0.056456	0.0766368		gene;var:SLF2|
chr10:100668400-102949239_2	chr10:102711762:rs12359673:A:G	6.77408	0.0529117	0.0757508		gene;var:SEMA4G|
chr10:100668400-102949239_2	chr10:102646515:rs11190736:A:G	6.60673	0.054388	0.0733655		gene;var:SLF2|
chr10:100668400-102949239_3	chr10:102631522:rs7897748:C:G	-5.81388	0.0506359	0.0681194		gene;var:SLF2|
chr10:100668400-102949239_2	chr10:102652802:rs7912847:A:C	6.64075	0.0544875	0.0672696		gene;var:SLF2|
chr10:100668400-102949239_2	chr10:102642118:rs74154231:A:G	6.56813	0.0503913	0.0671138		gene;var:SLF2|
chr10:100668400-102949239_3	chr10:102631644:rs7914607:T:G	-5.79165	0.0489762	0.0655495		gene;var:SLF2|
chr10:100668400-102949239_3	chr10:102626032:rs4917914:A:G	-5.78048	0.08758	0.0648493	peak|	gene;var:SLF2|
chr10:100668400-102949239_3	chr10:102632973:rs10883550:T:C	-5.76655	0.0473807	0.0646189		gene;var:SLF2|
chr10:100668400-102949239_3	chr10:102630683:rs912475:T:C	-5.76526	0.047218	0.0628072		gene;var:SLF2|
chr10:100668400-102949239_3	chr10:102627228:rs10883547:T:C	-5.77394	0.0827414	0.0608331	peak|	gene;var:SLF2|
chr10:102949239-104380410_2	chr10:104221529:rs17114534:T:C	-5.62934	0.508808	0.45547	Promoter|peak|	gene;var:MFSD13A|
chr10:102949239-104380410_2	chr10:104220576:rs4917968:T:C	-5.57474	0.465589	0.412822	Promoter|CRE|peak|	gene;var:MFSD13A|cre:PSD|
chr10:102949239-104380410_2	chr10:104222377:rs4919643:C:G	-5.55741	0.342038	0.370379	peak|	gene;var:MFSD13A|
chr10:102949239-104380410_1	chr10:104030201:rs2479551:A:G	-5.98749	0.102995	0.155648		gene;var:GBF1|
chr10:102949239-104380410_1	chr10:104053595:rs1081655:T:C	-5.9987	0.102138	0.154486		gene;var:GBF1|
chr10:102949239-104380410_1	chr10:103992569:rs7923183:A:G	-5.98208	0.176373	0.152318	peak|	gene;var:ELOVL3|
chr10:102949239-104380410_1	chr10:103992964:rs3758552:T:C	-5.98025	0.175921	0.151943	peak|	gene;var:ELOVL3|
chr10:102949239-104380410_1	chr10:104029803:rs772018:T:C	-5.98268	0.0996573	0.150914		gene;var:GBF1|
chr10:102949239-104380410_1	chr10:103998258:rs4919620:A:G	-5.96383	0.174435	0.150673	peak|	gene;var:PITX3|
chr10:102949239-104380410_1	chr10:104012941:rs4919622:T:C	-5.96349	0.0994231	0.150608		gene;var:GBF1|
chr10:102949239-104380410_1	chr10:103996576:rs733283:A:T	-5.95549	0.0983452	0.149089		gene;var:PITX3|
chr10:102949239-104380410_1	chr10:104013092:rs4919623:C:G	-5.95713	0.0976159	0.148012		gene;var:GBF1|
chr10:102949239-104380410_1	chr10:104034087:rs2485371:T:C	-5.94784	0.170858	0.147709	peak|	gene;var:GBF1|
chr10:102949239-104380410_1	chr10:104008280:rs7080055:A:C	-5.94557	0.0970832	0.147312		gene;var:GBF1|
chr10:102949239-104380410_1	chr10:104012677:rs11191245:T:C	-5.95367	0.0960547	0.145898		gene;var:GBF1|
chr10:102949239-104380410_1	chr10:103998671:rs4919621:A:T	-5.90761	0.165218	0.143041	peak|	gene;var:PITX3|
chr10:102949239-104380410_1	chr10:104140602:rs3781295:A:G	-5.46767	0.0911789	0.138569		gene;var:NFKB2|
chr10:102949239-104380410_1	chr10:104114328:rs3802681:T:C	-5.86527	0.158663	0.137647	peak|	gene;var:NFKB2|
chr10:102949239-104380410_1	chr10:104049150:rs2485374:A:G	-5.88817	0.0898126	0.137133		gene;var:GBF1|
chr10:102949239-104380410_1	chr10:104112737:rs11191267:T:C	-5.85675	0.0895477	0.136737		gene;var:NFKB2|
chr10:102949239-104380410_1	chr10:104036008:rs772022:A:G	-5.86245	0.0891523	0.136194		gene;var:GBF1|
chr10:102949239-104380410_1	chr10:104117009:rs10786665:T:C	-5.84787	0.0889071	0.135845		gene;var:NFKB2|
chr10:102949239-104380410_1	chr10:104002409:rs3758551:A:G	-5.86013	0.0885913	0.135421		gene;var:PITX3|
chr10:102949239-104380410_1	chr10:104031289:rs772016:T:C	-5.84003	0.0883738	0.135103		gene;var:GBF1|
chr10:102949239-104380410_1	chr10:104036449:rs772021:A:T	-5.86483	0.0881712	0.134844		gene;var:GBF1|
chr10:102949239-104380410_1	chr10:104049966:rs2485375:T:C	-5.85651	0.0876483	0.134117		gene;var:GBF1|
chr10:102949239-104380410_1	chr10:104060529:rs1796765:T:C	-5.82539	0.0874531	0.133826		gene;var:GBF1|
chr10:102949239-104380410_1	chr10:104025383:rs2479555:A:G	-5.81252	0.0873145	0.133613		gene;var:GBF1|
chr10:102949239-104380410_1	chr10:103991381:rs2281983:A:G	-5.85739	0.465963	0.133305	Exon|peak|	gene;var:ELOVL3|
chr10:102949239-104380410_1	chr10:103993689:rs3808938:C:G	-5.84045	0.427915	0.133283	CRE|DAR|peak|	gene;var:PITX3|cre:GBF1|cre:RPARP-AS1|cre:C10orf95|cre:PSD|cre:FBXL15|
chr10:102949239-104380410_1	chr10:104050006:rs2485376:A:G	-5.84618	0.0870412	0.133275		gene;var:GBF1|
chr10:102949239-104380410_1	chr10:104081349:rs72845663:T:C	-5.81886	0.0864765	0.132486		gene;var:NFKB2|
chr10:102949239-104380410_1	chr10:104008751:rs4244350:A:G	-5.82139	0.152013	0.132233	peak|	gene;var:GBF1|
chr10:102949239-104380410_1	chr10:104036355:rs812799:A:G	-5.83026	0.0861925	0.132102		gene;var:GBF1|
chr10:102949239-104380410_1	chr10:104072327:rs772029:T:C	-5.81033	0.0860463	0.131894		gene;var:GBF1|
chr10:102949239-104380410_1	chr10:103992599:rs3758553:T:C	-5.83646	0.151451	0.131763	peak|	gene;var:ELOVL3|
chr10:102949239-104380410_1	chr10:104066117:rs796427:A:C	-5.79673	0.0859145	0.131704		gene;var:GBF1|
chr10:102949239-104380410_1	chr10:104008870:rs4244351:C:G	-5.80179	0.150427	0.130952	peak|	gene;var:GBF1|
chr10:102949239-104380410_1	chr10:103997645:rs1541047:T:C	-5.77488	0.0852236	0.130713		gene;var:PITX3|
chr10:102949239-104380410_1	chr10:104015818:rs7916262:T:G	-5.79693	0.0851527	0.130665		gene;var:GBF1|
chr10:102949239-104380410_1	chr10:103992122:rs1854291:T:C	-5.8149	0.0849924	0.130423		gene;var:ELOVL3|
chr10:102949239-104380410_1	chr10:104079091:rs56115161:A:C	-5.77525	0.084966	0.130407		gene;var:GBF1|
chr10:102949239-104380410_1	chr10:104064885:rs772010:C:G	-5.7744	0.149694	0.13036	peak|	gene;var:GBF1|
chr10:102949239-104380410_1	chr10:104005386:rs1541046:A:G	-5.78229	0.186931	0.129871	Promoter|	gene;var:GBF1|
chr10:102949239-104380410_1	chr10:104000307:rs9664049:T:C	-5.78045	0.186789	0.129779	Promoter|peak|	gene;var:PITX3|
chr10:102949239-104380410_1	chr10:104028507:rs2479552:A:C	-5.80362	0.0842081	0.129306		gene;var:GBF1|
chr10:102949239-104380410_1	chr10:104076025:rs772023:A:G	-5.72116	0.146138	0.127568	peak|	gene;var:GBF1|
chr10:102949239-104380410_1	chr10:104078760:rs2993089:C:G	-5.7231	0.0827022	0.127407		gene;var:GBF1|
chr10:102949239-104380410_1	chr10:104063367:rs772012:A:G	-5.68606	0.410109	0.127213	CRE|peak|	gene;var:GBF1|cre:GBF1|cre:C10orf95|cre:PSD|
chr10:102949239-104380410_1	chr10:104102331:rs4331020:A:G	-5.7036	0.145605	0.127171	peak|	gene;var:NFKB2|
chr10:102949239-104380410_1	chr10:104067023:rs772008:A:G	-5.67885	0.0822048	0.126785		gene;var:GBF1|
chr10:102949239-104380410_1	chr10:104075541:rs772026:T:G	-5.67388	0.144976	0.126731	peak|	gene;var:GBF1|
chr10:102949239-104380410_1	chr10:104098949:rs11814894:A:G	-5.70639	0.0821574	0.126662		gene;var:NFKB2|
chr10:110317705-112561493_1	chr10:111855439:rs2501571:T:G	7.18103	0.352387	0.733585		gene;var:ADD3|
chr10:110317705-112561493_1	chr10:111792819:rs67781842:A:C	6.98751	0.757779	0.30842	CRE|DAR|peak|	gene;var:ADD3-AS1|cre:ADD3|
chr10:112561493-115328432_1	chr10:114801488:rs72826094:A:T	-11.0845	0.316488	0.374158		gene;var:TCF7L2|
chr10:112561493-115328432_1	chr10:114788436:rs56299331:T:C	-11.0205	0.408458	0.273137	peak|	gene;var:TCF7L2|
chr10:112561493-115328432_1	chr10:114795256:rs4367880:C:G	-11.0278	0.20948	0.253932		gene;var:TCF7L2|
chr10:112561493-115328432_1	chr10:114806697:rs61872786:A:G	-10.8523	0.142529	0.185036		gene;var:TCF7L2|
chr10:112561493-115328432_3	chr10:114808072:rs10885409:T:C	-9.56363	0.0581153	0.0717644		gene;var:TCF7L2|
chr10:112561493-115328432_3	chr10:114794719:rs7919152:T:C	-9.58809	0.0519128	0.064365		gene;var:TCF7L2|
chr10:112561493-115328432_3	chr10:114807047:rs11196205:C:G	-9.52693	0.0529931	0.0625354		gene;var:TCF7L2|
chr10:112561493-115328432_3	chr10:114801938:rs11196200:C:G	-9.55332	0.0508781	0.0624305		gene;var:TCF7L2|
chr10:112561493-115328432_3	chr10:114762064:rs6585197:T:G	-9.47828	0.0496829	0.06121		gene;var:TCF7L2|
chr10:112561493-115328432_3	chr10:114789077:rs7077039:T:C	-9.50718	0.0486097	0.0584934		gene;var:TCF7L2|
chr10:112561493-115328432_3	chr10:114765171:rs6585199:A:G	-9.45144	0.0480381	0.0581648		gene;var:TCF7L2|
chr10:112561493-115328432_3	chr10:114793451:rs12359102:A:G	-9.5373	0.0485644	0.0580508		gene;var:TCF7L2|
chr10:112561493-115328432_3	chr10:114801525:rs7895340:A:G	-9.53492	0.0484203	0.0577961		gene;var:TCF7L2|
chr10:112561493-115328432_3	chr10:114762237:rs6585198:A:G	-9.43971	0.0473468	0.056928		gene;var:TCF7L2|
chr10:112561493-115328432_3	chr10:114793823:rs7900150:A:T	-9.52272	0.0476924	0.0565256		gene;var:TCF7L2|
chr10:112561493-115328432_3	chr10:114768783:rs6585201:A:G	-9.52604	0.0470524	0.0564855		gene;var:TCF7L2|
chr10:112561493-115328432_3	chr10:114787012:rs7924080:T:C	-9.45961	0.0465944	0.0557052		gene;var:TCF7L2|
chr10:112561493-115328432_3	chr10:114761697:rs10885402:A:C	-9.40276	0.046384	0.0553631		gene;var:TCF7L2|
chr10:112561493-115328432_3	chr10:114793237:rs7086857:A:G	-9.50466	0.0466467	0.0547482		gene;var:TCF7L2|
chr10:112561493-115328432_3	chr10:114787090:rs7907610:A:G	-9.44784	0.0459342	0.0545668		gene;var:TCF7L2|
chr10:112561493-115328432_3	chr10:114796048:rs7100927:A:G	-9.52199	0.0465365	0.05454		gene;var:TCF7L2|
chr10:112561493-115328432_3	chr10:114810240:rs12265291:T:C	-9.4278	0.0479278	0.0541996		gene;var:TCF7L2|
chr10:112561493-115328432_3	chr10:114786154:rs4128597:A:G	-9.4342	0.045626	0.0538489		gene;var:TCF7L2|
chr10:112561493-115328432_3	chr10:114783838:rs11196193:T:C	-9.44832	0.0450563	0.0529174		gene;var:TCF7L2|
chr10:112561493-115328432_3	chr10:114768609:rs6585200:A:G	-9.43002	0.0447116	0.0527659		gene;var:TCF7L2|
chr10:112561493-115328432_3	chr10:114777396:rs7918599:T:C	-9.43899	0.0445596	0.0521069		gene;var:TCF7L2|
chr10:112561493-115328432_3	chr10:114785939:rs4128598:A:G	-9.43719	0.0444652	0.0519544		gene;var:TCF7L2|
chr10:112561493-115328432_3	chr10:114785278:rs4309084:A:G	-9.43343	0.0442682	0.0516377		gene;var:TCF7L2|
chr10:112561493-115328432_3	chr10:114778252:rs11196190:A:G	-9.43118	0.0441513	0.0514508		gene;var:TCF7L2|
chr10:112561493-115328432_3	chr10:114773927:rs7904519:A:G	-9.4196	0.0438885	0.0508105		gene;var:TCF7L2|
chr10:112561493-115328432_3	chr10:114781698:rs12258200:T:C	-9.41914	0.0779483	0.0504759	peak|	gene;var:TCF7L2|
chr10:112561493-115328432_3	chr10:114791388:rs10885408:A:G	-9.42323	0.0438256	0.0504463		gene;var:TCF7L2|
chr10:112561493-115328432_3	chr10:114764661:rs10787471:A:G	-8.84936	0.0451405	0.0500854		gene;var:TCF7L2|
chr10:112561493-115328432_3	chr10:114783586:rs6585204:C:G	-9.43002	0.0431845	0.0498876		gene;var:TCF7L2|
chr10:112561493-115328432_3	chr10:114783403:rs6585203:C:G	-9.40125	0.0426431	0.0491066		gene;var:TCF7L2|
chr10:112561493-115328432_3	chr10:114777724:rs10885406:A:G	-9.39323	0.0422539	0.0485221		gene;var:TCF7L2|
chr10:112561493-115328432_3	chr10:114811316:rs11196208:T:C	-9.35691	0.0440001	0.0484235		gene;var:TCF7L2|
chr10:112561493-115328432_3	chr10:114777670:rs10885405:T:C	-9.40986	0.0421967	0.0483952		gene;var:TCF7L2|
chr10:112561493-115328432_3	chr10:114782803:rs6585202:T:C	-9.40837	0.0421251	0.0482892		gene;var:TCF7L2|
chr10:112561493-115328432_3	chr10:114781400:rs10787473:A:C	-9.38697	0.0751653	0.0480785	peak|	gene;var:TCF7L2|
chr10:112561493-115328432_3	chr10:114780633:rs11196191:A:C	-9.37953	0.194981	0.0475639	DAR|peak|	gene;var:TCF7L2|
chr10:112561493-115328432_3	chr10:114812071:rs7077247:T:C	-9.35951	0.0431876	0.0473015		gene;var:TCF7L2|
chr10:112561493-115328432_3	chr10:114813041:rs4077527:T:C	-9.35667	0.042954	0.0469327		gene;var:TCF7L2|
chr10:112561493-115328432_3	chr10:114781297:rs10787472:A:C	-9.36615	0.0409846	0.0466748		gene;var:TCF7L2|
chr10:112561493-115328432_3	chr10:114813047:rs12718338:T:C	-9.34627	0.0424444	0.0462637		gene;var:TCF7L2|
chr10:112561493-115328432_3	chr10:114779538:rs7899529:A:G	-9.35387	0.0404311	0.0458978		gene;var:TCF7L2|
chr10:112561493-115328432_3	chr10:114783333:rs7921525:T:C	-9.34348	0.0399731	0.045268		gene;var:TCF7L2|
chr10:112561493-115328432_3	chr10:114746580:rs4073980:C:G	-9.1912	0.040061	0.0425261		gene;var:TCF7L2|
chr10:116421406-119523934_1	chr10:117842360:rs4751949:T:C	-6.01974	0.989404	0.989404		gene;var:GFRA1|
chr10:116421406-119523934_2	chr10:117784999:rs117353919:A:T	-5.57106	0.982201	0.982201		gene;var:GFRA1|
chr10:123900545-125869346_2	chr10:124238949:rs760337:A:G	6.08679	0.19115	0.38562		gene;var:HTRA1|
chr10:123900545-125869346_2	chr10:124238710:rs760336:T:C	6.07681	0.77388	0.374277	DAR|peak|	gene;var:HTRA1|	10:124238710:T:C:HTRA1|
chr10:123900545-125869346_2	chr10:124238997:rs760338:T:C	6.05433	0.175386	0.350332		gene;var:HTRA1|
chr10:123900545-125869346_1	chr10:124234037:rs2142308:C:G	-9.76752	0.49991	0.207687	DAR|peak|	gene;var:HTRA1|
chr10:123900545-125869346_1	chr10:124235355:rs2672587:C:G	-9.45007	0.23302	0.20188	peak|	gene;var:HTRA1|
chr10:123900545-125869346_1	chr10:124214976:rs36212731:T:G	-9.66232	0.22035	0.164237	Promoter|peak|	gene;var:ARMS2|
chr10:123900545-125869346_1	chr10:124215421:rs3750847:T:C	-9.67989	0.0965665	0.158324		gene;var:ARMS2|
chr10:123900545-125869346_1	chr10:124231464:rs932275:A:G	-9.71001	0.0932968	0.1541		gene;var:HTRA1|
chr10:123900545-125869346_1	chr10:124215198:rs36212732:A:G	-9.66491	0.163657	0.150989	peak|	gene;var:ARMS2|
chr10:123900545-125869346_1	chr10:124230024:rs58077526:A:C	-9.69253	0.16139	0.149158	peak|	gene;var:HTRA1|
chr10:123900545-125869346_1	chr10:124215315:rs3750848:T:G	-9.65614	0.160222	0.147019	peak|	gene;var:ARMS2|
chr10:123900545-125869346_1	chr10:124215565:rs3750846:T:C	-9.65427	0.159516	0.146204	peak|	gene;var:ARMS2|
chr10:123900545-125869346_1	chr10:124215211:rs36212733:T:C	-9.64449	0.155938	0.14209	peak|	gene;var:ARMS2|
chr10:123900545-125869346_1	chr10:124214448:rs10490924:T:G	-9.63454	0.191335	0.138167	Promoter|peak|	gene;var:ARMS2|
chr10:123900545-125869346_1	chr10:124213046:rs61871747:T:C	-9.61507	0.14638	0.131198	peak|	gene;var:ARMS2|
chr10:123900545-125869346_1	chr10:124212913:rs61871746:T:C	-9.58861	0.0786839	0.123036		gene;var:ARMS2|
chr10:123900545-125869346_1	chr10:124209684:rs11200630:T:C	-9.52986	0.0725092	0.110746		gene;var:ARMS2|
chr10:123900545-125869346_1	chr10:124211536:rs11200632:A:G	-9.51927	0.0713976	0.108681		gene;var:ARMS2|
chr10:123900545-125869346_1	chr10:124210369:rs61871745:A:G	-9.48898	0.0685775	0.103491		gene;var:ARMS2|
chr10:123900545-125869346_1	chr10:124226630:rs2284665:T:G	-9.49029	0.0680194	0.103311		gene;var:HTRA1|
chr10:123900545-125869346_2	chr10:124238153:rs11200645:T:C	-6.5093	0.0646915	0.096784		gene;var:HTRA1|
chr10:123900545-125869346_1	chr10:124211596:rs11200633:T:C	-9.40843	0.0631401	0.0937445		gene;var:ARMS2|
chr10:123900545-125869346_2	chr10:124241557:rs2253755:A:G	-6.1964	0.0625461	0.0919193		gene;var:HTRA1|
chr10:125869346-128001098_2	chr10:126843661:rs1693655:T:C	-6.823	0.991828	0.977362	peak|	gene;var:CTBP2|
chr10:125869346-128001098_1	chr10:126810140:rs1254701:A:G	-7.82724	0.577536	0.770743		gene;var:CTBP2|
chr10:125869346-128001098_1	chr10:126808877:rs1254702:A:C	-7.88328	0.797389	0.724961	peak|	gene;var:CTBP2|
chr10:29783692-30458838_10	chr10:30316872:rs3739996:T:C	-7.9116	0.621437	0.306797	Exon|DAR|peak|	gene;var:JCAD|
chr10:29783692-30458838_10	chr10:30317826:rs7920682:A:G	-7.56048	0.60984	0.299447	Exon|DAR|peak|	gene;var:JCAD|
chr10:29783692-30458838_10	chr10:30317838:rs7920686:A:G	-7.50383	0.584535	0.280775	Exon|DAR|peak|	gene;var:JCAD|
chr10:29783692-30458838_10	chr10:30327392:rs943439:T:C	-7.73136	0.213335	0.271422	peak|	gene;var:JCAD|
chr10:29783692-30458838_10	chr10:30300895:rs61841112:A:G	-7.68383	0.549821	0.26965	CRE|peak|	gene;var:JCAD|cre:JCAD|
chr10:29783692-30458838_10	chr10:30326776:rs10826753:T:C	-7.52687	0.127408	0.268951		gene;var:JCAD|
chr10:29783692-30458838_10	chr10:30312970:rs61841113:T:C	-7.74039	0.116446	0.266988		gene;var:JCAD|
chr10:29783692-30458838_10	chr10:30319861:rs10826751:T:C	-7.44186	0.11191	0.262326		gene;var:JCAD|
chr10:29783692-30458838_10	chr10:30313117:rs11007864:T:C	-7.33862	0.101849	0.231238		gene;var:JCAD|
chr10:29783692-30458838_10	chr10:30316208:rs2185724:T:C	-7.41856	0.503117	0.22804	Exon|DAR|peak|	gene;var:JCAD|
chr10:29783692-30458838_10	chr10:30322865:rs2066332:A:G	-7.64589	0.101096	0.224173		gene;var:JCAD|
chr10:29783692-30458838_10	chr10:30311507:rs4572040:A:C	-7.51685	0.0949361	0.207876		gene;var:JCAD|
chr10:29783692-30458838_10	chr10:30335422:rs7089816:A:T	-7.39738	0.0942506	0.207221		gene;var:JCAD|
chr10:29783692-30458838_10	chr10:30335361:rs7071848:A:G	-7.39661	0.0941905	0.207081		gene;var:JCAD|
chr10:29783692-30458838_10	chr10:30327316:rs943440:A:G	-7.43098	0.164252	0.20439	peak|	gene;var:JCAD|
chr10:29783692-30458838_10	chr10:30334804:rs7071112:A:G	-7.3664	0.0918818	0.201724		gene;var:JCAD|
chr10:29783692-30458838_10	chr10:30313786:rs12784436:A:G	-7.1822	0.0892079	0.200409		gene;var:JCAD|
chr10:29783692-30458838_10	chr10:30310120:rs2014144:T:C	-7.14551	0.0889676	0.193456		gene;var:JCAD|
chr10:29783692-30458838_10	chr10:30323410:rs11007869:T:C	-7.29072	0.149192	0.191774	peak|	gene;var:JCAD|
chr10:29783692-30458838_10	chr10:30333025:rs61841115:T:C	-7.18688	0.0851966	0.186313		gene;var:JCAD|
chr10:29783692-30458838_10	chr10:30322878:rs2066333:T:C	-7.09484	0.0842588	0.184901		gene;var:JCAD|
chr10:29783692-30458838_10	chr10:30323189:rs2066334:A:G	-7.1942	0.0792989	0.177833		gene;var:JCAD|
chr10:29783692-30458838_10	chr10:30332618:rs4749524:C:G	-7.19511	0.40563	0.177832	CRE|peak|	gene;var:JCAD|cre:JCAD|
chr10:29783692-30458838_10	chr10:30332445:rs4749523:A:G	-7.117	0.404549	0.177777	CRE|peak|	gene;var:JCAD|cre:JCAD|
chr10:29783692-30458838_10	chr10:30307661:rs7071535:T:C	-7.17673	0.141002	0.177765	peak|	gene;var:JCAD|
chr10:29783692-30458838_10	chr10:30292474:rs12780390:T:C	-6.16654	0.0891919	0.173497		gene;var:JCAD|
chr10:29783692-30458838_10	chr10:30304918:rs1063205:T:C	-7.13978	0.425884	0.168531	3_UTR|	gene;var:JCAD|
chr10:29783692-30458838_10	chr10:30313663:rs55885169:T:C	-7.07739	0.133618	0.166448	peak|	gene;var:JCAD|
chr10:29783692-30458838_10	chr10:30327735:rs943438:T:C	-6.98948	0.132894	0.165259	peak|	gene;var:JCAD|
chr10:29783692-30458838_10	chr10:30293816:rs10826747:T:G	-6.08118	0.0829758	0.162904		gene;var:JCAD|
chr10:29783692-30458838_10	chr10:30298078:rs1418278:A:G	-6.34282	0.0797927	0.159409		gene;var:JCAD|
chr10:29783692-30458838_10	chr10:30292570:rs61841111:A:G	-6.17592	0.0743314	0.151128		gene;var:JCAD|
chr10:29783692-30458838_10	chr10:30292597:rs11007851:T:C	-5.92792	0.0761034	0.150915		gene;var:JCAD|
chr10:29783692-30458838_10	chr10:30292293:rs12779954:A:T	-5.90455	0.0752513	0.149604		gene;var:JCAD|
chr10:29783692-30458838_10	chr10:30291173:rs12251253:C:G	-5.48084	0.0735386	0.148766		gene;var:JCAD|
chr10:29783692-30458838_10	chr10:30300420:rs17294968:A:G	-6.34767	0.0717137	0.148662		gene;var:JCAD|
chr10:29783692-30458838_10	chr10:30298522:rs10826749:T:C	-6.15992	0.0728752	0.146764		gene;var:JCAD|
chr10:29783692-30458838_10	chr10:30297785:rs1418275:A:C	-6.34774	0.070267	0.146451		gene;var:JCAD|
chr10:29783692-30458838_10	chr10:30297987:rs1418276:T:C	-6.12179	0.0717083	0.144754		gene;var:JCAD|
chr10:29783692-30458838_10	chr10:30299477:rs9787674:T:C	-6.32236	0.123732	0.143688	peak|	gene;var:JCAD|
chr10:29783692-30458838_10	chr10:30298047:rs1418277:A:G	-6.2496	0.0687611	0.141552		gene;var:JCAD|
chr10:29783692-30458838_10	chr10:30298560:rs11815861:C:G	-6.25942	0.06855	0.141145		gene;var:JCAD|
chr10:29783692-30458838_10	chr10:30296358:rs4749520:A:G	-5.99838	0.0693139	0.140617		gene;var:JCAD|
chr10:29783692-30458838_4	chr10:30298563:rs11815882:A:G	-6.24226	0.0682569	0.140554		gene;var:JCAD|
chr10:29783692-30458838_3	chr10:30294555:rs1832864:A:G	-6.04751	0.0676781	0.139074		gene;var:JCAD|
chr10:29783692-30458838_10	chr10:30297128:rs11815283:T:C	-6.18169	0.345885	0.138811	CRE|DAR|peak|	gene;var:JCAD|cre:JCAD|
chr10:29783692-30458838_10	chr10:30300079:rs12259037:A:G	-6.10562	0.0669428	0.137771		gene;var:JCAD|
chr10:29783692-30458838_10	chr10:30296648:rs4749521:T:C	-6.10951	0.0667705	0.137502		gene;var:JCAD|
chr10:44730075-48760450_2	chr10:48301766:rs1217168:A:G	-5.88206	0.798597	0.815307		gene;var:ANXA8|
chr10:44730075-48760450_2	chr10:48300663:rs925587:T:C	-5.80481	0.694624	0.719977		gene;var:ANXA8|
chr10:44730075-48760450_1	chr10:45415209:rs10793568:A:G	-6.22884	0.602144	0.647942		gene;var:TMEM72|
chr10:44730075-48760450_1	chr10:45415207:rs10793567:T:C	-6.22279	0.598535	0.644198		gene;var:TMEM72|
chr10:44730075-48760450_1	chr10:45411453:rs4948929:C:G	-6.17014	0.57983	0.625361		gene;var:TMEM72|
chr10:44730075-48760450_1	chr10:45411165:rs10793566:C:G	-6.15966	0.574913	0.620231		gene;var:TMEM72|
chr10:44730075-48760450_1	chr10:45409244:rs6593449:T:C	-6.14491	0.804997	0.614746	peak|	gene;var:TMEM72|	10:45409244:T:C:TMEM72|
chr10:48760450-50840915_1	chr10:49408240:rs74130191:A:T	-10.9246	1	1		gene;var:FRMPD2|
chr10:48760450-50840915_2	chr10:49445540:rs11101268:A:G	-9.34277	0.984397	0.929967	CRE|DAR|peak|	gene;var:FRMPD2|cre:FRMPD2|	10:49445540:A:G:FRMPD2|10:49445540:A:G:FRMPD2|
chr10:48760450-50840915_4	chr10:49454324:rs280614:T:C	-7.50869	0.339762	0.438308	peak|	gene;var:FRMPD2|	10:49454324:T:C:FRMPD2|
chr10:48760450-50840915_3	chr10:49483894:rs7091218:T:C	-6.34809	0.459407	0.344696	Promoter|peak|	gene;var:FRMPD2|	10:49483894:T:C:FRMPD2|
chr10:48760450-50840915_3	chr10:49484698:rs7071413:A:G	-6.33354	0.189801	0.32035		gene;var:FRMPD2|
chr10:48760450-50840915_4	chr10:49450781:rs280613:A:G	-7.52114	0.127958	0.261306		gene;var:FRMPD2|
chr10:48760450-50840915_4	chr10:49452271:rs166816:C:G	-7.40106	0.130058	0.251515		gene;var:FRMPD2|
chr10:48760450-50840915_3	chr10:49484476:rs7092085:T:G	-6.26269	0.135562	0.227941		gene;var:FRMPD2|
chr10:48760450-50840915_3	chr10:49484481:rs7081140:C:G	-6.10438	0.0833995	0.138446		gene;var:FRMPD2|
chr10:48760450-50840915_2	chr10:49643359:rs76626172:A:T	-8.99167	0.0537286	0.119858		gene;var:ARHGAP22|
chr10:48760450-50840915_3	chr10:49483439:rs2002545:T:C	-5.59964	0.135539	0.102923	Promoter|	gene;var:FRMPD2|	10:49483439:T:C:FRMPD2|
chr10:48760450-50840915_4	chr10:49445800:rs733955:T:C	-7.64503	0.297763	0.0995404	CRE|DAR|peak|	gene;var:FRMPD2|cre:FRMPD2|
chr10:48760450-50840915_4	chr10:49445608:rs11101269:C:G	-7.65362	0.289467	0.0965926	CRE|DAR|peak|	gene;var:FRMPD2|cre:FRMPD2|
chr10:48760450-50840915_3	chr10:49479768:rs17009551:T:C	-5.74743	0.268473	0.0836078	CRE|peak|	gene;var:FRMPD2|cre:FRMPD2|	10:49479768:T:C:FRMPD2|10:49479768:T:C:FRMPD2|
chr10:58959528-60289987_2	chr10:60285134:rs12784328:T:C	-8.77686	1	1		gene;var:BICC1|
chr10:58959528-60289987_5	chr10:60271824:rs7069916:A:G	-10.2526	0.999731	0.997895	CRE|peak|	gene;var:BICC1|cre:BICC1|
chr10:58959528-60289987_4	chr10:60264741:rs2033149:A:T	-10.7001	0.240487	0.275414		gene;var:BICC1|
chr10:58959528-60289987_4	chr10:60271940:rs7095501:T:C	-11.0747	0.157501	0.0855935	Promoter|CRE|peak|	gene;var:BICC1|cre:BICC1|
chr10:58959528-60289987_4	chr10:60272248:rs7074778:T:C	-11.0775	0.154509	0.0839808	Promoter|	gene;var:BICC1|
chr10:58959528-60289987_3	chr10:60264047:rs7917952:A:G	-7.8769	0.077474	0.0807923		gene;var:BICC1|
chr10:58959528-60289987_4	chr10:60271987:rs7073504:A:G	-11.0841	0.147746	0.0803234	Promoter|	gene;var:BICC1|
chr10:58959528-60289987_3	chr10:60264002:rs7907007:T:C	-7.87458	0.0768163	0.0800961		gene;var:BICC1|
chr10:58959528-60289987_3	chr10:60261306:rs7081545:T:C	-7.81057	0.0614936	0.0639822		gene;var:BICC1|
chr10:58959528-60289987_3	chr10:60262769:rs7086027:C:G	-7.78915	0.0574026	0.0597205		gene;var:BICC1|
chr10:58959528-60289987_1	chr10:60287300:rs1658488:C:G	-11.2717	0.0569535	0.0593336		gene;var:BICC1|
chr10:58959528-60289987_3	chr10:60262734:rs7074076:A:T	-7.78067	0.055905	0.0581658		gene;var:BICC1|
chr10:58959528-60289987_3	chr10:60260729:rs1427210:T:C	-7.7768	0.0552435	0.05748		gene;var:BICC1|
chr10:58959528-60289987_3	chr10:60262983:rs6481398:A:G	-7.77323	0.0546442	0.0568593		gene;var:BICC1|
chr10:58959528-60289987_3	chr10:60260562:rs7901933:T:C	-7.77103	0.0542811	0.0564834		gene;var:BICC1|
chr10:58959528-60289987_3	chr10:60260405:rs7917834:A:G	-7.77093	0.0542651	0.0564668		gene;var:BICC1|
chr10:58959528-60289987_3	chr10:60261778:rs7922642:A:G	-7.769	0.053949	0.0561398		gene;var:BICC1|
chr10:58959528-60289987_3	chr10:60258315:rs7092553:T:C	-7.75588	0.0518907	0.054014		gene;var:BICC1|
chr10:58959528-60289987_3	chr10:60258685:rs1593669:A:G	-7.75583	0.0518819	0.054005		gene;var:BICC1|
chr10:58959528-60289987_3	chr10:60258376:rs7091667:A:G	-7.75402	0.0516091	0.0537237		gene;var:BICC1|
chr10:58959528-60289987_3	chr10:60261875:rs7894660:A:G	-7.7527	0.0514117	0.0535204		gene;var:BICC1|
chr10:58959528-60289987_3	chr10:60258995:rs7895732:A:G	-7.75237	0.0513635	0.0534707		gene;var:BICC1|
chr10:58959528-60289987_3	chr10:60261882:rs7909847:T:C	-7.75215	0.05133	0.0534362		gene;var:BICC1|
chr10:58959528-60289987_4	chr10:60271531:rs7087998:A:G	-11.0686	0.237438	0.053348	CRE|peak|	gene;var:BICC1|cre:BICC1|
chr10:58959528-60289987_3	chr10:60257318:rs10763549:C:G	-7.75057	0.0510964	0.0531956		gene;var:BICC1|
chr10:58959528-60289987_1	chr10:60289551:rs1658478:T:C	-11.2516	0.0499194	0.05311		gene;var:BICC1|
chr10:58959528-60289987_4	chr10:60273977:rs10763552:T:C	-11.1076	0.0439503	0.0522271		gene;var:BICC1|
chr10:58959528-60289987_4	chr10:60289607:rs1658477:A:G	-11.2468	0.0485687	0.0519225		gene;var:BICC1|
chr10:58959528-60289987_4	chr10:60289695:rs1649089:T:C	-11.2465	0.048479	0.0518438		gene;var:BICC1|
chr10:58959528-60289987_4	chr10:60287635:rs1346300:C:G	-11.2465	0.0484691	0.0518351		gene;var:BICC1|
chr10:58959528-60289987_3	chr10:60256916:rs11006165:C:G	-7.74025	0.049616	0.0516731		gene;var:BICC1|
chr10:58959528-60289987_4	chr10:60286028:rs1649021:T:C	-11.2444	0.0479204	0.0513542		gene;var:BICC1|
chr10:58959528-60289987_4	chr10:60288933:rs1658483:T:C	-11.2439	0.0477998	0.0512486		gene;var:BICC1|
chr10:58959528-60289987_4	chr10:60285820:rs1649023:A:G	-11.2437	0.0477446	0.0512003		gene;var:BICC1|
chr10:58959528-60289987_3	chr10:60256616:rs12240644:T:C	-7.73649	0.049096	0.0511392		gene;var:BICC1|
chr10:58959528-60289987_4	chr10:60268783:rs6481400:T:C	-11.0334	0.0419473	0.051111		gene;var:BICC1|
chr10:58959528-60289987_3	chr10:60258221:rs7079612:T:C	-7.73599	0.0490282	0.0510696		gene;var:BICC1|
chr10:58959528-60289987_4	chr10:60274213:rs10826199:T:C	-11.0983	0.0431805	0.0506967		gene;var:BICC1|
chr10:58959528-60289987_4	chr10:60269100:rs7917717:A:C	-11.0355	0.0415231	0.0505773		gene;var:BICC1|
chr10:58959528-60289987_4	chr10:60268880:rs6481401:A:C	-11.036	0.0414326	0.0504633		gene;var:BICC1|
chr10:58959528-60289987_4	chr10:60268977:rs6481402:T:C	-11.036	0.0414187	0.0504458		gene;var:BICC1|
chr10:58959528-60289987_4	chr10:60268398:rs717453:T:C	-11.0363	0.041363	0.0503756		gene;var:BICC1|
chr10:58959528-60289987_3	chr10:60259025:rs7916229:T:C	-7.73065	0.0483094	0.0503326		gene;var:BICC1|
chr10:58959528-60289987_4	chr10:60269755:rs1427201:T:G	-11.0365	0.0413281	0.0503317		gene;var:BICC1|
chr10:58959528-60289987_4	chr10:60269738:rs36097682:A:G	-11.037	0.0412306	0.0502088		gene;var:BICC1|
chr10:58959528-60289987_4	chr10:60266839:rs1863664:A:G	-11.0372	0.0411887	0.0501561		gene;var:BICC1|
chr10:58959528-60289987_4	chr10:60265957:rs12250013:A:C	-11.0373	0.0411608	0.0501209		gene;var:BICC1|
chr10:58959528-60289987_4	chr10:60269326:rs11006169:A:T	-11.0374	0.0411469	0.0501034		gene;var:BICC1|
chr10:58959528-60289987_4	chr10:60265404:rs7084402:A:G	-11.0376	0.041119	0.0500682		gene;var:BICC1|
chr10:58959528-60289987_4	chr10:60267917:rs1427202:A:T	-11.0376	0.041119	0.0500682		gene;var:BICC1|
chr10:58959528-60289987_4	chr10:60273155:rs7079648:A:C	-11.1183	0.095853	0.0499741	Promoter|CRE|DAR|peak|	gene;var:BICC1|cre:BICC1|
chr10:58959528-60289987_4	chr10:60273898:rs10763551:A:G	-11.1186	0.0957639	0.0499226	Promoter|	gene;var:BICC1|
chr10:58959528-60289987_3	chr10:60256327:rs7083014:C:G	-7.7254	0.0476235	0.0496303		gene;var:BICC1|
chr10:58959528-60289987_4	chr10:60269691:rs34774248:A:G	-11.0394	0.0407561	0.0496105		gene;var:BICC1|
chr10:58959528-60289987_4	chr10:60286816:rs9416705:T:C	-11.2359	0.0458635	0.0495613		gene;var:BICC1|
chr10:58959528-60289987_4	chr10:60268270:rs717452:A:G	-11.0398	0.0406862	0.0495223		gene;var:BICC1|
chr10:58959528-60289987_4	chr10:60274606:rs7897298:T:C	-11.1052	0.0422175	0.0494854		gene;var:BICC1|
chr10:58959528-60289987_4	chr10:60275150:rs1427197:A:G	-11.1053	0.0421977	0.0494603		gene;var:BICC1|
chr10:58959528-60289987_4	chr10:60286159:rs2577393:T:C	-11.2353	0.0457193	0.0494363		gene;var:BICC1|
chr10:58959528-60289987_4	chr10:60289031:rs1649015:A:G	-11.2352	0.0457121	0.0494301		gene;var:BICC1|
chr10:58959528-60289987_1	chr10:60280153:rs1658495:A:C	-11.2287	0.0453868	0.0494183		gene;var:BICC1|
chr10:58959528-60289987_4	chr10:60282078:rs1632584:T:C	-11.2349	0.0456482	0.0493748		gene;var:BICC1|
chr10:58959528-60289987_4	chr10:60270235:rs7921207:T:G	-11.0406	0.0405254	0.0493193		gene;var:BICC1|
chr10:58959528-60289987_4	chr10:60270260:rs7910442:T:G	-11.0406	0.0405254	0.0493193		gene;var:BICC1|
chr10:58959528-60289987_4	chr10:60288331:rs1658485:A:G	-11.2341	0.0454734	0.0492236		gene;var:BICC1|
chr10:58959528-60289987_4	chr10:60267137:rs1346302:A:G	-11.0412	0.0404135	0.049178		gene;var:BICC1|
chr10:58959528-60289987_4	chr10:60273430:rs7078900:A:G	-11.1225	0.0944708	0.0491725	Promoter|CRE|DAR|peak|	gene;var:BICC1|cre:BICC1|
chr10:58959528-60289987_4	chr10:60285867:rs1649022:A:G	-11.2336	0.0453502	0.0491171		gene;var:BICC1|
chr10:58959528-60289987_4	chr10:60289440:rs1649091:A:T	-11.233	0.0452357	0.0490182		gene;var:BICC1|
chr10:58959528-60289987_4	chr10:60285924:rs1658489:A:G	-11.233	0.0452291	0.0490125		gene;var:BICC1|
chr10:58959528-60289987_4	chr10:60274182:rs10826198:T:C	-11.1089	0.0417387	0.0488753		gene;var:BICC1|
chr10:58959528-60289987_4	chr10:60281090:rs1658493:T:C	-11.2318	0.0449865	0.0488034		gene;var:BICC1|
chr10:58959528-60289987_4	chr10:60268599:rs4113952:T:C	-11.0391	0.0399716	0.0487419		gene;var:BICC1|
chr10:58959528-60289987_4	chr10:60280911:rs1649027:T:G	-11.2314	0.0448969	0.0487262		gene;var:BICC1|
chr10:58959528-60289987_4	chr10:60280323:rs1658494:T:C	-11.2313	0.0448779	0.0487099		gene;var:BICC1|
chr10:58959528-60289987_4	chr10:60281354:rs1658491:T:C	-11.2312	0.0448526	0.0486881		gene;var:BICC1|
chr10:58959528-60289987_3	chr10:60262042:rs7894822:A:T	-7.70921	0.0464488	0.0483868		gene;var:BICC1|
chr10:58959528-60289987_1	chr10:60279324:rs1649034:A:G	-11.2343	0.0440454	0.048316		gene;var:BICC1|
chr10:58959528-60289987_4	chr10:60266640:rs1863665:T:C	-11.045	0.0397127	0.0482916		gene;var:BICC1|
chr10:58959528-60289987_3	chr10:60262046:rs7909982:T:C	-7.7084	0.0463499	0.0482859		gene;var:BICC1|
chr10:58959528-60289987_4	chr10:60281267:rs1658492:T:C	-11.2286	0.044331	0.0482404		gene;var:BICC1|
chr10:58959528-60289987_1	chr10:60289339:rs1658481:A:G	-11.2392	0.0446144	0.0481515		gene;var:BICC1|
chr10:58959528-60289987_4	chr10:60272369:rs11817440:T:C	-11.1173	0.091341	0.0480735	Promoter|CRE|DAR|peak|	gene;var:BICC1|cre:BICC1|
chr10:58959528-60289987_4	chr10:60280428:rs1649028:A:G	-11.2275	0.0441192	0.0480593		gene;var:BICC1|
chr10:58959528-60289987_4	chr10:60279742:rs1649031:A:G	-11.2274	0.0441023	0.0480449		gene;var:BICC1|
chr10:58959528-60289987_4	chr10:60288111:rs1649019:T:C	-11.227	0.0440242	0.0479783		gene;var:BICC1|
chr10:58959528-60289987_4	chr10:60288150:rs1649018:T:G	-11.227	0.0440242	0.0479783		gene;var:BICC1|
chr10:58959528-60289987_4	chr10:60288081:rs1658486:A:T	-11.2269	0.0440132	0.0479688		gene;var:BICC1|
chr10:58959528-60289987_4	chr10:60266555:rs12257983:A:C	-11.0477	0.0392348	0.0476861		gene;var:BICC1|
chr10:58959528-60289987_4	chr10:60276369:rs11006170:T:C	-11.118	0.0407305	0.0475661		gene;var:BICC1|
chr10:58959528-60289987_4	chr10:60278140:rs12264028:T:C	-11.1202	0.0405127	0.0472774		gene;var:BICC1|
chr10:58959528-60289987_1	chr10:60279909:rs1658496:A:G	-11.2387	0.0433268	0.0471111		gene;var:BICC1|
chr10:58959528-60289987_4	chr10:60276291:rs1896243:T:C	-11.1216	0.0403748	0.0470931		gene;var:BICC1|
chr10:58959528-60289987_4	chr10:60276083:rs1896245:T:G	-11.1228	0.0402643	0.0469447		gene;var:BICC1|
chr10:58959528-60289987_4	chr10:60276829:rs7094882:T:C	-11.1232	0.0402263	0.0468933		gene;var:BICC1|
chr10:58959528-60289987_4	chr10:60277249:rs2170779:A:G	-11.1245	0.0401143	0.0467416		gene;var:BICC1|
chr10:58959528-60289987_4	chr10:60277549:rs1365740:A:C	-11.1249	0.0400836	0.0466998		gene;var:BICC1|
chr10:58959528-60289987_4	chr10:60276068:rs1896246:A:G	-11.1263	0.0399665	0.0465397		gene;var:BICC1|
chr10:58959528-60289987_1	chr10:60281400:rs1649026:A:G	-11.2303	0.0425252	0.0460091		gene;var:BICC1|
chr10:58959528-60289987_4	chr10:60278255:rs12248958:A:G	-11.1315	0.0395651	0.0459796		gene;var:BICC1|
chr10:58959528-60289987_4	chr10:60277489:rs1365741:T:C	-11.1326	0.0394866	0.0458675		gene;var:BICC1|
chr10:58959528-60289987_4	chr10:60271372:rs7091440:A:T	-11.1007	0.037482	0.0457474		gene;var:BICC1|
chr10:58959528-60289987_4	chr10:60265622:rs7088421:T:C	-11.057	0.0376742	0.0457012		gene;var:BICC1|
chr10:58959528-60289987_4	chr10:60266152:rs12259315:T:C	-11.0588	0.0373905	0.0453392		gene;var:BICC1|
chr10:58959528-60289987_1	chr10:60279830:rs1649030:A:G	-11.2274	0.0409849	0.0449727		gene;var:BICC1|
chr10:58959528-60289987_1	chr10:60281616:rs1658490:A:G	-11.2281	0.0407759	0.0446745		gene;var:BICC1|
chr10:58959528-60289987_4	chr10:60278573:rs1427196:T:C	-11.1486	0.0386812	0.0446085		gene;var:BICC1|
chr10:58959528-60289987_1	chr10:60279701:rs1649032:T:C	-11.2235	0.0402853	0.0443387		gene;var:BICC1|
chr10:58959528-60289987_4	chr10:60278967:rs1427195:T:C	-11.1684	0.0384937	0.0439089		gene;var:BICC1|
chr10:58959528-60289987_1	chr10:60286071:rs6481404:C:G	-11.225	0.0396155	0.0437441		gene;var:BICC1|
chr10:58959528-60289987_1	chr10:60289398:rs1658479:A:C	-11.2256	0.0387439	0.0426197		gene;var:BICC1|
chr10:58959528-60289987_4	chr10:60274928:rs1427200:T:C	-11.1065	0.036289	0.0425865		gene;var:BICC1|
chr10:58959528-60289987_3	chr10:60257577:rs982323:A:G	-7.65933	0.0404618	0.0423663		gene;var:BICC1|
chr10:58959528-60289987_4	chr10:60279634:rs1649033:T:C	-11.2086	0.0380639	0.0423539		gene;var:BICC1|
chr10:58959528-60289987_4	chr10:60276906:rs7098326:T:C	-11.1097	0.0360107	0.042219		gene;var:BICC1|
chr10:58959528-60289987_4	chr10:60276915:rs7098329:T:C	-11.11	0.0359922	0.042194		gene;var:BICC1|
chr10:58959528-60289987_4	chr10:60274049:rs10763553:A:C	-11.1102	0.0359018	0.0420657		gene;var:BICC1|
chr10:58959528-60289987_3	chr10:60256077:rs1427212:C:G	-7.71331	0.0400758	0.0419931		gene;var:BICC1|
chr10:58959528-60289987_4	chr10:60274970:rs1427198:T:G	-11.1204	0.0353004	0.0412317		gene;var:BICC1|
chr10:58959528-60289987_4	chr10:60274941:rs1427199:T:C	-11.1228	0.0351664	0.04104		gene;var:BICC1|
chr10:58959528-60289987_4	chr10:60278487:rs11006171:T:C	-11.1375	0.0347615	0.0403343		gene;var:BICC1|
chr10:58959528-60289987_4	chr10:60276182:rs1896244:A:G	-11.13	0.0347098	0.0400243		gene;var:BICC1|
chr10:58959528-60289987_1	chr10:60289374:rs1658480:C:G	-11.2054	0.0355174	0.0395717		gene;var:BICC1|
chr10:58959528-60289987_4	chr10:60273121:rs7100474:T:C	-11.1376	0.0765374	0.039014	Promoter|CRE|DAR|peak|	gene;var:BICC1|cre:BICC1|
chr10:58959528-60289987_3	chr10:60255562:rs6481396:C:G	-7.66141	0.0361081	0.0380421		gene;var:BICC1|
chr10:58959528-60289987_4	chr10:60267640:rs1427204:A:C	-11.0513	0.0314472	0.0376464		gene;var:BICC1|
chr10:58959528-60289987_4	chr10:60267310:rs1346301:A:G	-11.0609	0.0305374	0.0364571		gene;var:BICC1|
chr10:58959528-60289987_4	chr10:60277089:rs7098606:T:C	-11.1341	0.0315468	0.0362629		gene;var:BICC1|
chr10:58959528-60289987_4	chr10:60277055:rs7097576:A:G	-11.134	0.0315449	0.0362619		gene;var:BICC1|
chr10:73508512-75422550_10	chr10:74086652:rs9415063:T:C	-7.40627	0.156381	0.237721	peak|	gene;var:DNAJB12|	10:74086652:T:C:DNAJB12|
chr10:73508512-75422550_10	chr10:74125582:rs9416019:A:G	-7.3951	0.134486	0.193844	peak|	gene;var:DNAJB12|	10:74125582:A:G:DNAJB12|
chr10:73508512-75422550_10	chr10:74127853:rs4262652:A:G	-7.35979	0.403641	0.163664	3_UTR|	gene;var:DNAJB12|	10:74127853:A:G:DNAJB12|
chr10:73508512-75422550_10	chr10:74113333:rs9415068:T:C	-7.26917	0.0439245	0.100648		gene;var:DNAJB12|
chr10:73508512-75422550_10	chr10:74091924:rs9415066:T:C	-7.20932	0.207749	0.0804174	CRE|DAR|peak|	gene;var:DNAJB12|cre:SPOCK2|
chr10:73508512-75422550_10	chr10:74091950:rs9416016:T:C	-7.13071	0.159243	0.0563775	CRE|DAR|peak|	gene;var:DNAJB12|cre:SPOCK2|
chr10:73508512-75422550_10	chr10:74078627:rs2394861:T:C	-7.00528	0.0420375	0.0423631	peak|	gene;var:DNAJB12|
chr10:73508512-75422550_10	chr10:74078408:rs4596994:T:G	-6.97086	0.0383758	0.037354	peak|	gene;var:DNAJB12|
chr10:73508512-75422550_10	chr10:74077308:rs4747245:A:T	-6.95249	0.0209821	0.0359913		gene;var:DNAJB12|
chr10:73508512-75422550_10	chr10:74083427:rs7895933:A:G	-6.95174	0.0207266	0.0357757		gene;var:DNAJB12|
chr10:73508512-75422550_10	chr10:74077393:rs4747246:T:C	-6.94709	0.0203693	0.034881		gene;var:DNAJB12|
chr10:73508512-75422550_10	chr10:74082212:rs9416013:A:G	-6.94588	0.036525	0.0345418	peak|	gene;var:DNAJB12|
chr10:73508512-75422550_10	chr10:74048745:rs28843406:A:G	-6.68667	0.0345974	0.0286629	peak|	gene;var:DDIT4|
chr10:73508512-75422550_10	chr10:74046212:rs10762505:T:C	-6.59937	0.0943901	0.0281426	DAR|peak|	gene;var:DDIT4|
chr10:73508512-75422550_10	chr10:74045917:rs10509767:A:C	-6.57986	0.0920302	0.0271596	DAR|peak|	gene;var:DDIT4|
chr10:73508512-75422550_10	chr10:74046191:rs10740398:C:G	-6.56472	0.0907836	0.0266023	DAR|peak|	gene;var:DDIT4|
chr10:73508512-75422550_10	chr10:74100642:rs9416018:A:G	-6.85559	0.0181346	0.0262804		gene;var:DNAJB12|
chr10:73508512-75422550_10	chr10:74042995:rs4746112:A:G	-6.54456	0.0329788	0.0259116	peak|	gene;var:DDIT4|
chr10:73508512-75422550_10	chr10:74037193:rs4747242:A:C	-6.53345	0.0181686	0.0256973		gene;var:DDIT4|
chr10:73508512-75422550_10	chr10:74031569:rs10465978:A:C	-6.53204	0.0327981	0.0256525	peak|	gene;var:DDIT4|
chr10:73508512-75422550_10	chr10:74043874:rs12768834:A:G	-6.53505	0.0180977	0.0256048		gene;var:DDIT4|
chr10:73508512-75422550_10	chr10:74039335:rs10762504:A:C	-6.52184	0.0180902	0.0255017		gene;var:DDIT4|
chr10:73508512-75422550_10	chr10:74089364:rs9415064:T:C	-6.8273	0.0863665	0.0254544	DAR|peak|	gene;var:DNAJB12|
chr10:73508512-75422550_10	chr10:74039762:rs10740397:A:G	-6.52564	0.0326213	0.0254529	peak|	gene;var:DDIT4|
chr10:73508512-75422550_10	chr10:74039074:rs10733886:A:C	-6.52522	0.0326099	0.02544	peak|	gene;var:DDIT4|
chr10:73508512-75422550_10	chr10:74040034:rs10823911:A:C	-6.52201	0.103257	0.0253418	CRE|DAR|peak|	gene;var:DDIT4|cre:DDIT4|
chr10:73508512-75422550_10	chr10:74038181:rs7898235:A:C	-6.52132	0.0179827	0.0253209		gene;var:DDIT4|
chr10:73508512-75422550_10	chr10:74048669:rs11596656:A:G	-6.60356	0.0319453	0.0252932	peak|	gene;var:DDIT4|
chr10:73508512-75422550_10	chr10:74035041:rs1053639:A:T	-6.50976	0.113773	0.0249787	3_UTR|	gene;var:DDIT4|
chr10:73508512-75422550_10	chr10:74031208:rs4405230:T:G	-6.4992	0.0322649	0.0249678	peak|	gene;var:DDIT4|
chr10:73508512-75422550_10	chr10:74073037:rs7081608:A:G	-6.7672	0.0167495	0.0248352		gene;var:DDIT4|
chr10:73508512-75422550_10	chr10:74036429:rs4747241:T:C	-6.48186	0.0174216	0.0241759		gene;var:DDIT4|
chr10:73508512-75422550_10	chr10:74069782:rs4074609:T:C	-6.74072	0.0297484	0.0240002	peak|	gene;var:DDIT4|
chr10:73508512-75422550_2	chr10:74072136:rs4746116:T:C	-6.73265	0.0162873	0.0236473		gene;var:DDIT4|
chr10:73508512-75422550_10	chr10:74047616:rs6480614:A:T	-6.55033	0.0168477	0.0235604		gene;var:DDIT4|
chr10:73508512-75422550_10	chr10:74035297:rs8316:T:C	-6.51411	0.105738	0.0228123	3_UTR|	gene;var:DDIT4|
chr10:73508512-75422550_10	chr10:74039563:rs6480610:A:G	-6.51448	0.0298243	0.022779	peak|	gene;var:DDIT4|
chr10:73508512-75422550_2	chr10:74069445:rs11596698:C:G	-6.69841	0.0288599	0.022736	peak|	gene;var:DDIT4|
chr10:73508512-75422550_10	chr10:74046370:rs7086698:A:G	-6.51191	0.0296664	0.0226324	peak|	gene;var:DDIT4|
chr10:73508512-75422550_10	chr10:74043334:rs6480611:T:C	-6.49035	0.0162449	0.0222658		gene;var:DDIT4|
chr10:73508512-75422550_10	chr10:74143756:rs7071040:A:T	-6.38077	0.0172585	0.0222211		gene;var:DNAJB12|
chr10:73508512-75422550_10	chr10:74067715:rs10733887:T:C	-6.6478	0.0156009	0.0218643		gene;var:DDIT4|
chr10:73508512-75422550_10	chr10:74065949:rs4451633:T:C	-6.61066	0.0152931	0.0210375		gene;var:DDIT4|
chr10:73508512-75422550_10	chr10:74071178:rs4746113:A:G	-6.30175	0.0157747	0.0206015		gene;var:DDIT4|
chr10:73508512-75422550_10	chr10:74576831:rs7092031:T:G	-6.16935	0.0160062	0.0205359		gene;var:OIT3|
chr10:73508512-75422550_10	chr10:74158593:rs11000286:T:C	-6.22195	0.0159899	0.0204861		gene;var:DNAJB12|
chr10:73508512-75422550_10	chr10:74575354:rs11000420:T:C	-6.07216	0.0159918	0.0204712		gene;var:OIT3|
chr10:73508512-75422550_10	chr10:74520474:rs12762766:T:C	-5.66892	0.0159581	0.0204127		gene;var:MIR4676|
chr10:73508512-75422550_10	chr10:74050503:rs7090673:T:C	-6.54044	0.0150196	0.0202908		gene;var:DDIT4|
chr10:73508512-75422550_10	chr10:74574063:rs12146246:T:C	-6.09002	0.0158579	0.0202893		gene;var:OIT3|
chr10:73508512-75422550_10	chr10:74573355:rs6480644:T:C	-5.71102	0.0157761	0.0202557		gene;var:OIT3|
chr10:73508512-75422550_10	chr10:73992227:rs7913505:A:G	-5.68567	0.0155869	0.0202236		gene;var:ASCC1|
chr10:73508512-75422550_10	chr10:74433626:rs4268436:A:G	-6.08595	0.0157348	0.020147		gene;var:MCU|
chr10:73508512-75422550_10	chr10:74576436:rs10823943:T:C	-6.07039	0.0156812	0.0200876		gene;var:OIT3|
chr10:73508512-75422550_10	chr10:74547033:rs7081970:T:C	-6.12196	0.0156517	0.0200837		gene;var:MIR4676|
chr10:73508512-75422550_10	chr10:74575228:rs10823942:A:G	-6.07242	0.0156642	0.0200636		gene;var:OIT3|
chr10:73508512-75422550_10	chr10:74050218:rs7074233:A:T	-6.5155	0.0149292	0.0200476		gene;var:DDIT4|
chr10:73508512-75422550_10	chr10:74569797:rs7897773:T:C	-6.06325	0.0156316	0.0200252		gene;var:OIT3|
chr10:73508512-75422550_10	chr10:74574690:rs11000419:A:T	-6.05733	0.0156231	0.0199959		gene;var:OIT3|
chr10:73508512-75422550_10	chr10:74581597:rs2121097:A:T	-6.10946	0.0155659	0.0199745		gene;var:OIT3|
chr10:73508512-75422550_10	chr10:74574702:rs4353194:A:G	-6.05479	0.0155741	0.0199531		gene;var:OIT3|
chr10:73508512-75422550_10	chr10:74100279:rs9416017:T:C	-6.54012	0.0272923	0.0199529	peak|	gene;var:DNAJB12|
chr10:73508512-75422550_10	chr10:74434736:rs10762518:T:G	-6.07089	0.0155664	0.0199517		gene;var:MCU|
chr10:73508512-75422550_10	chr10:74053313:rs7088870:T:C	-6.50352	0.0268923	0.0198926	peak|	gene;var:DDIT4|
chr10:73508512-75422550_10	chr10:74337491:rs12777811:A:T	-5.57693	0.035741	0.0198912	Promoter|	gene;var:MIR1256|
chr10:73508512-75422550_10	chr10:74430595:rs7920193:A:G	-6.05354	0.0155127	0.0198688		gene;var:MCU|
chr10:73508512-75422550_10	chr10:74568071:rs1900133:T:G	-6.03928	0.0155027	0.0198457		gene;var:OIT3|
chr10:73508512-75422550_10	chr10:74422321:rs3009562:A:G	-6.05005	0.0154901	0.0198405		gene;var:MCU|
chr10:73508512-75422550_10	chr10:74399868:rs3000975:A:C	-6.04022	0.0154275	0.0197623		gene;var:MICU1|
chr10:73508512-75422550_10	chr10:74567969:rs2395008:T:C	-6.02849	0.0154044	0.0197403		gene;var:OIT3|
chr10:73508512-75422550_10	chr10:74560343:rs11000417:C:G	-6.02578	0.0154167	0.0197387		gene;var:MIR4676|
chr10:73508512-75422550_10	chr10:74053751:rs10762506:T:C	-6.48478	0.0147996	0.0197311		gene;var:DDIT4|
chr10:73508512-75422550_10	chr10:74568353:rs2395007:T:C	-6.03598	0.0153857	0.0197224		gene;var:OIT3|
chr10:73508512-75422550_10	chr10:74417501:rs9416026:T:C	-6.03466	0.0153929	0.019719		gene;var:MICU1|
chr10:73508512-75422550_10	chr10:73999157:rs4999044:T:C	-5.94297	0.0274946	0.0197102	peak|	gene;var:ASCC1|
chr10:73508512-75422550_10	chr10:74422262:rs3009563:T:C	-6.02859	0.0153558	0.0196728		gene;var:MCU|
chr10:73508512-75422550_10	chr10:74363573:rs5013011:A:C	-6.0434	0.0153491	0.0196701		gene;var:MICU1|
chr10:73508512-75422550_10	chr10:74054871:rs3998462:T:C	-6.47539	0.0267251	0.0196526	peak|	gene;var:DDIT4|
chr10:73508512-75422550_10	chr10:73998720:rs9415059:A:G	-5.93297	0.0151382	0.019628		gene;var:ASCC1|
chr10:73508512-75422550_10	chr10:74425755:rs4746121:T:G	-6.02908	0.0153035	0.0196213		gene;var:MCU|
chr10:73508512-75422550_10	chr10:74451195:rs3009558:A:C	-6.03174	0.0353217	0.0196212	Promoter|peak|	gene;var:MCU|
chr10:73508512-75422550_10	chr10:74146932:rs10823918:T:G	-6.37141	0.0152229	0.0195921		gene;var:DNAJB12|
chr10:73508512-75422550_10	chr10:74417164:rs9415071:T:C	-6.0158	0.0152799	0.0195782		gene;var:MICU1|
chr10:73508512-75422550_10	chr10:74410169:rs3000978:T:C	-6.01553	0.0152784	0.0195762		gene;var:MICU1|
chr10:73508512-75422550_10	chr10:74400990:rs3009570:T:C	-6.01266	0.0152618	0.0195556		gene;var:MICU1|
chr10:73508512-75422550_10	chr10:74588887:rs11000423:A:T	-5.98394	0.0152514	0.019547		gene;var:OIT3|
chr10:73508512-75422550_10	chr10:74575762:rs11000421:A:C	-6.00217	0.0152478	0.0195443		gene;var:OIT3|
chr10:73508512-75422550_10	chr10:74420880:rs7078570:A:G	-6.01257	0.0152339	0.0195363		gene;var:MCU|
chr10:73508512-75422550_10	chr10:74169872:rs1029207:T:C	-6.38068	0.0151589	0.0195279		gene;var:DNAJB12|
chr10:73508512-75422550_10	chr10:74412460:rs3000981:T:C	-6.00854	0.0152382	0.0195263		gene;var:MICU1|
chr10:73508512-75422550_10	chr10:74060530:rs10740400:C:G	-6.46073	0.0266379	0.0195237	peak|	gene;var:DDIT4|
chr10:73508512-75422550_10	chr10:74133120:rs11000274:A:C	-6.47334	0.0150404	0.0195167		gene;var:DNAJB12|
chr10:73508512-75422550_10	chr10:74598947:rs11000425:T:C	-5.99451	0.0152308	0.0195078		gene;var:OIT3|
chr10:73508512-75422550_10	chr10:74145346:rs9664616:A:T	-6.38375	0.0151473	0.0195046		gene;var:DNAJB12|
chr10:73508512-75422550_10	chr10:74588300:rs12783338:A:G	-5.99237	0.0152188	0.0194929		gene;var:OIT3|
chr10:73508512-75422550_10	chr10:74410581:rs3000979:A:T	-6.00242	0.0152038	0.0194834		gene;var:MICU1|
chr10:73508512-75422550_10	chr10:74420144:rs3009565:T:G	-6.00906	0.0151894	0.0194783		gene;var:MCU|
chr10:73508512-75422550_10	chr10:74559839:rs12779026:T:C	-5.99667	0.0151917	0.0194722		gene;var:MIR4676|
chr10:73508512-75422550_10	chr10:74402802:rs3000976:A:G	-6.00326	0.015182	0.0194711		gene;var:MICU1|
chr10:73508512-75422550_10	chr10:74168136:rs1977683:A:G	-6.37272	0.0151136	0.019467		gene;var:DNAJB12|
chr10:73508512-75422550_10	chr10:74149857:rs12762148:T:C	-6.37836	0.0151166	0.0194636		gene;var:DNAJB12|
chr10:73508512-75422550_10	chr10:74442817:rs3009560:C:G	-5.99862	0.0151912	0.0194607		gene;var:MCU|
chr10:73508512-75422550_10	chr10:74395496:rs3009522:C:G	-5.99748	0.0151766	0.0194496		gene;var:MICU1|
chr10:73508512-75422550_10	chr10:74455876:rs3009556:T:C	-5.82122	0.0151533	0.0194457		gene;var:MCU|
chr10:73508512-75422550_10	chr10:74165198:rs7909498:T:C	-6.39802	0.0150553	0.0194428		gene;var:DNAJB12|
chr10:73508512-75422550_10	chr10:74583782:rs7919738:A:C	-5.98734	0.0151651	0.0194412		gene;var:OIT3|
chr10:73508512-75422550_10	chr10:74420798:rs7075049:C:G	-6.00284	0.0151554	0.0194358		gene;var:MCU|
chr10:73508512-75422550_10	chr10:74131542:rs7897548:A:G	-6.13047	0.0150832	0.0194357		gene;var:DNAJB12|
chr10:73508512-75422550_10	chr10:74010785:rs7092573:A:G	-5.87922	0.0864131	0.0194303	CRE|DAR|peak|	gene;var:DDIT4|cre:ANAPC16|cre:DNAJB12|
chr10:73508512-75422550_10	chr10:74417792:rs3000985:T:C	-5.99716	0.0151488	0.0194296		gene;var:MICU1|
chr10:73508512-75422550_10	chr10:74395897:rs9416025:A:G	-5.99611	0.0151432	0.0194226		gene;var:MICU1|
chr10:73508512-75422550_10	chr10:74019707:rs4746110:T:C	-5.91708	0.0270031	0.0194169	peak|	gene;var:DDIT4|
chr10:73508512-75422550_10	chr10:74414774:rs3000984:T:C	-5.99993	0.0151398	0.0194162		gene;var:MICU1|
chr10:73508512-75422550_10	chr10:74412184:rs3000980:C:G	-5.99985	0.0151393	0.0194157		gene;var:MICU1|
chr10:73508512-75422550_10	chr10:74401810:rs3009569:T:C	-5.99969	0.0151385	0.0194146		gene;var:MICU1|
chr10:73508512-75422550_10	chr10:74409482:rs3000977:A:G	-5.99919	0.0151358	0.0194113		gene;var:MICU1|
chr10:73508512-75422550_10	chr10:74413074:rs3000982:A:G	-5.99748	0.0151267	0.0193999		gene;var:MICU1|
chr10:73508512-75422550_10	chr10:74058511:rs10762508:A:G	-6.44163	0.0146743	0.019396		gene;var:DDIT4|
chr10:73508512-75422550_10	chr10:74421198:rs3009564:T:C	-5.99595	0.0151186	0.0193898		gene;var:MCU|
chr10:73508512-75422550_10	chr10:74172286:rs7075632:T:C	-6.36173	0.0150533	0.0193863		gene;var:DNAJB12|
chr10:73508512-75422550_10	chr10:74414516:rs3000983:A:G	-5.99483	0.0151127	0.0193824		gene;var:MICU1|
chr10:73508512-75422550_10	chr10:74588940:rs11000424:T:C	-5.97836	0.015117	0.0193812		gene;var:OIT3|
chr10:73508512-75422550_10	chr10:74397787:rs3009520:A:G	-5.98949	0.0151081	0.0193787		gene;var:MICU1|
chr10:73508512-75422550_10	chr10:74611992:rs6480645:A:C	-5.97728	0.0151113	0.0193741		gene;var:OIT3|
chr10:73508512-75422550_10	chr10:74149244:rs9663480:T:C	-6.31259	0.0150651	0.0193619		gene;var:DNAJB12|
chr10:73508512-75422550_10	chr10:74057642:rs6480615:A:C	-6.43411	0.0847869	0.0193596	CRE|peak|	gene;var:DDIT4|cre:ANAPC16|cre:DDIT4|
chr10:73508512-75422550_10	chr10:74398699:rs3009516:T:C	-5.9865	0.0273104	0.0193592	peak|	gene;var:MICU1|	10:74398699:T:C:MICU1|
chr10:73508512-75422550_10	chr10:74057844:rs6480616:T:C	-6.43386	0.084785	0.0193584	CRE|peak|	gene;var:DDIT4|cre:ANAPC16|cre:DDIT4|
chr10:73508512-75422550_10	chr10:74588110:rs4085324:A:G	-5.97358	0.015092	0.0193501		gene;var:OIT3|
chr10:73508512-75422550_10	chr10:74533664:rs2121094:A:G	-6.0396	0.015066	0.0193433		gene;var:MIR4676|
chr10:73508512-75422550_10	chr10:74570913:rs7097134:A:G	-5.97211	0.0150844	0.0193406		gene;var:OIT3|
chr10:73508512-75422550_10	chr10:74607272:rs12357952:C:G	-5.97114	0.0150794	0.0193344		gene;var:OIT3|
chr10:73508512-75422550_10	chr10:74510086:rs1900134:A:T	-6.04149	0.015058	0.0193342		gene;var:MIR4676|
chr10:73508512-75422550_10	chr10:74152283:rs12778141:T:C	-6.38562	0.0149901	0.0193277		gene;var:DNAJB12|
chr10:73508512-75422550_10	chr10:74567059:rs2166334:A:G	-5.96596	0.0150768	0.0193172		gene;var:MIR4676|
chr10:73508512-75422550_10	chr10:74587845:rs4085325:T:C	-5.96819	0.0150643	0.0193156		gene;var:OIT3|
chr10:73508512-75422550_10	chr10:74448833:rs12765740:T:G	-5.98231	0.0150714	0.0193143		gene;var:MCU|
chr10:73508512-75422550_10	chr10:74584314:rs7923659:A:G	-5.96609	0.0150537	0.0193024		gene;var:OIT3|
chr10:73508512-75422550_10	chr10:74144842:rs11000282:C:G	-6.30366	0.0271769	0.0193014	peak|	gene;var:DNAJB12|
chr10:73508512-75422550_10	chr10:74450319:rs3009559:A:C	-5.96874	0.0150508	0.0192988		gene;var:MCU|
chr10:73508512-75422550_10	chr10:74149236:rs9663479:T:G	-6.3027	0.0150136	0.019295		gene;var:DNAJB12|
chr10:73508512-75422550_10	chr10:74442258:rs3009561:A:G	-5.97309	0.015056	0.0192934		gene;var:MCU|
chr10:73508512-75422550_10	chr10:74605905:rs12784503:A:C	-5.96449	0.0150456	0.0192923		gene;var:OIT3|
chr10:73508512-75422550_10	chr10:74581126:rs7910161:T:G	-5.96389	0.0150426	0.0192886		gene;var:OIT3|
chr10:73508512-75422550_10	chr10:74398411:rs3009517:T:C	-5.97436	0.0150308	0.019282		gene;var:MICU1|
chr10:73508512-75422550_10	chr10:74398140:rs3009518:A:G	-5.97908	0.015032	0.0192817		gene;var:MICU1|
chr10:73508512-75422550_10	chr10:74451485:rs2921446:A:C	-5.99977	0.0346654	0.0192808	Promoter|	gene;var:MCU|
chr10:73508512-75422550_10	chr10:74600066:rs7076278:A:T	-5.95861	0.0150395	0.0192712		gene;var:OIT3|
chr10:73508512-75422550_10	chr10:74022606:rs12219429:A:G	-5.89734	0.0268293	0.0192699	peak|	gene;var:DDIT4|
chr10:73508512-75422550_10	chr10:74568683:rs10823940:C:G	-5.96061	0.0150262	0.0192682		gene;var:OIT3|
chr10:73508512-75422550_10	chr10:74586245:rs3849961:A:G	-5.96502	0.0150258	0.0192658		gene;var:OIT3|
chr10:73508512-75422550_10	chr10:74201276:rs7474900:A:G	-5.45897	0.0148897	0.0192642		gene;var:MICU1|
chr10:73508512-75422550_10	chr10:74601256:rs7097558:A:G	-5.96442	0.0150229	0.0192621		gene;var:OIT3|
chr10:73508512-75422550_10	chr10:74604441:rs1996906:C:G	-5.95931	0.0150198	0.0192602		gene;var:OIT3|
chr10:73508512-75422550_10	chr10:74464138:rs3009551:A:C	-5.97821	0.0150286	0.0192594		gene;var:MCU|
chr10:73508512-75422550_10	chr10:74384015:rs3000971:T:C	-5.9699	0.0271598	0.0192546	peak|	gene;var:MICU1|	10:74384015:T:C:MICU1|
chr10:73508512-75422550_10	chr10:74564098:rs12764759:T:C	-5.95796	0.0150131	0.019252		gene;var:MIR4676|
chr10:73508512-75422550_10	chr10:74216323:rs4486543:C:G	-5.46238	0.0269189	0.0192437	peak|	gene;var:MICU1|	10:74216323:C:G:MICU1|
chr10:73508512-75422550_10	chr10:74059363:rs10762509:A:G	-6.40436	0.0264828	0.0192424	peak|	gene;var:DDIT4|
chr10:73508512-75422550_10	chr10:74147400:rs10762515:T:C	-6.29455	0.0149726	0.019242		gene;var:DNAJB12|
chr10:73508512-75422550_10	chr10:74446792:rs2166335:T:C	-5.978	0.015003	0.0192411		gene;var:MCU|
chr10:73508512-75422550_10	chr10:74397932:rs3009519:A:G	-5.97218	0.0149981	0.0192394		gene;var:MICU1|
chr10:73508512-75422550_10	chr10:74618014:rs7069276:T:G	-5.96054	0.0150038	0.0192384		gene;var:OIT3|
chr10:73508512-75422550_10	chr10:74060201:rs10740399:A:G	-6.40047	0.0146366	0.0192369		gene;var:DDIT4|
chr10:73508512-75422550_10	chr10:74214256:rs34176386:A:G	-5.46462	0.0148652	0.0192303		gene;var:MICU1|
chr10:73508512-75422550_10	chr10:74209487:rs4456180:T:C	-5.46662	0.0148566	0.0192185		gene;var:MICU1|
chr10:73508512-75422550_10	chr10:74621874:rs12773264:C:G	-5.94978	0.014996	0.0192176		gene;var:OIT3|
chr10:73508512-75422550_10	chr10:74181058:rs12769094:C:G	-6.36134	0.014894	0.0192035		gene;var:DNAJB12|
chr10:73508512-75422550_10	chr10:74606261:rs12785228:T:C	-5.94911	0.0149703	0.0191988		gene;var:OIT3|
chr10:73508512-75422550_10	chr10:74233155:rs7079960:A:G	-5.47076	0.0148391	0.0191944		gene;var:MICU1|
chr10:73508512-75422550_10	chr10:74138489:rs7090153:T:C	-6.30963	0.0149169	0.0191929		gene;var:DNAJB12|
chr10:73508512-75422550_10	chr10:74230380:rs2395233:C:G	-5.47136	0.0148366	0.0191909		gene;var:MICU1|
chr10:73508512-75422550_10	chr10:74405459:rs3009568:T:G	-5.56378	0.0149378	0.019187		gene;var:MICU1|
chr10:73508512-75422550_10	chr10:74081183:rs9415061:T:G	-6.44645	0.0847329	0.0191808	CRE|peak|	gene;var:DNAJB12|cre:SPOCK2|
chr10:73508512-75422550_10	chr10:74209093:rs7083517:T:C	-5.47367	0.0148269	0.0191776		gene;var:MICU1|
chr10:73508512-75422550_10	chr10:74515798:rs12765210:A:G	-5.95951	0.0149592	0.0191758		gene;var:MIR4676|
chr10:73508512-75422550_10	chr10:74149787:rs12357282:A:G	-6.28385	0.0149209	0.0191751		gene;var:DNAJB12|
chr10:73508512-75422550_10	chr10:74179814:rs12416491:T:C	-6.35591	0.0148689	0.0191694		gene;var:DNAJB12|
chr10:73508512-75422550_10	chr10:74459930:rs3009554:A:G	-5.9631	0.0149554	0.0191692		gene;var:MCU|
chr10:73508512-75422550_10	chr10:74285466:rs2065806:A:T	-5.9708	0.0149364	0.0191687		gene;var:MICU1|
chr10:73508512-75422550_10	chr10:74058471:rs10762507:C:G	-5.99993	0.0148273	0.0191652		gene;var:DDIT4|
chr10:73508512-75422550_10	chr10:74603520:rs12764943:A:C	-5.94321	0.0149425	0.0191643		gene;var:OIT3|
chr10:73508512-75422550_10	chr10:74209676:rs3957143:A:G	-5.47622	0.0148164	0.0191631		gene;var:MICU1|
chr10:73508512-75422550_10	chr10:74542189:rs11000414:T:C	-5.94024	0.0149505	0.0191615		gene;var:MIR4676|
chr10:73508512-75422550_10	chr10:74179829:rs7072132:T:C	-6.35443	0.0148622	0.0191603		gene;var:DNAJB12|
chr10:73508512-75422550_10	chr10:74389764:rs3009527:A:G	-5.95873	0.0149343	0.01916		gene;var:MICU1|
chr10:73508512-75422550_10	chr10:74345889:rs7905583:C:G	-6.1926	0.0148752	0.0191564		gene;var:MIR1256|
chr10:73508512-75422550_10	chr10:74392066:rs3009525:A:G	-5.95739	0.0149281	0.0191522		gene;var:MICU1|
chr10:73508512-75422550_10	chr10:74021558:rs10762503:A:G	-5.89285	0.0147379	0.0191397		gene;var:DDIT4|
chr10:73508512-75422550_10	chr10:74151947:rs7082028:T:G	-6.27613	0.014885	0.0191289		gene;var:DNAJB12|
chr10:73508512-75422550_10	chr10:74602966:rs10823944:A:G	-5.93654	0.0149118	0.0191263		gene;var:OIT3|
chr10:73508512-75422550_10	chr10:74139200:rs11000276:T:G	-6.29826	0.0859206	0.019124	CRE|DAR|peak|	gene;var:DNAJB12|cre:ANAPC16|cre:DNAJB12|
chr10:73508512-75422550_10	chr10:74017476:rs4625377:T:G	-5.88644	0.0147293	0.0191209		gene;var:DDIT4|
chr10:73508512-75422550_10	chr10:74059472:rs10823912:A:T	-6.33771	0.0264961	0.0191201	peak|	gene;var:DDIT4|
chr10:73508512-75422550_10	chr10:74514615:rs7086453:T:C	-5.94929	0.0149119	0.0191175		gene;var:MIR4676|
chr10:73508512-75422550_10	chr10:74562541:rs7904565:A:T	-5.93463	0.0149032	0.0191156		gene;var:MIR4676|
chr10:73508512-75422550_10	chr10:74392021:rs3009526:A:G	-5.95064	0.0148974	0.0191141		gene;var:MICU1|
chr10:73508512-75422550_10	chr10:74210392:rs11000310:T:C	-5.48533	0.0147796	0.0191123		gene;var:MICU1|
chr10:73508512-75422550_10	chr10:74180583:rs12411456:A:G	-6.27241	0.0148682	0.0191071		gene;var:DNAJB12|
chr10:73508512-75422550_10	chr10:74389715:rs3009528:A:G	-5.94923	0.0148911	0.0191063		gene;var:MICU1|
chr10:73508512-75422550_10	chr10:74514899:rs6480639:T:C	-5.94972	0.0148922	0.0191053		gene;var:MIR4676|
chr10:73508512-75422550_10	chr10:74388823:rs3000973:T:C	-5.94373	0.0148866	0.0191024		gene;var:MICU1|
chr10:73508512-75422550_10	chr10:74163894:rs11000289:T:C	-6.27028	0.0148586	0.0190948		gene;var:DNAJB12|
chr10:73508512-75422550_10	chr10:74592184:rs7904238:A:G	-5.9357	0.0148878	0.0190948		gene;var:OIT3|
chr10:73508512-75422550_10	chr10:74137774:rs7067565:A:G	-6.29314	0.0148417	0.0190941		gene;var:DNAJB12|
chr10:73508512-75422550_10	chr10:74164242:rs11000291:T:G	-6.27011	0.0148579	0.0190939		gene;var:DNAJB12|
chr10:73508512-75422550_10	chr10:74235232:rs915433:T:G	-5.5645	0.0147888	0.0190924		gene;var:MICU1|
chr10:73508512-75422550_10	chr10:74501835:rs7474728:A:C	-5.94409	0.0148885	0.0190887		gene;var:MIR4676|
chr10:73508512-75422550_10	chr10:74179071:rs12357181:A:G	-6.33587	0.0147985	0.0190777		gene;var:DNAJB12|
chr10:73508512-75422550_10	chr10:74227745:rs10823928:C:G	-5.49174	0.0147545	0.0190776		gene;var:MICU1|
chr10:73508512-75422550_10	chr10:74460226:rs9416029:A:G	-5.9467	0.0148806	0.0190772		gene;var:MCU|
chr10:73508512-75422550_10	chr10:74399783:rs3000974:T:C	-5.9379	0.0148609	0.0190705		gene;var:MICU1|
chr10:73508512-75422550_10	chr10:74151574:rs7094058:T:C	-6.26422	0.014832	0.0190606		gene;var:DNAJB12|
chr10:73508512-75422550_10	chr10:74159776:rs10823919:C:G	-6.26418	0.0148318	0.0190603		gene;var:DNAJB12|
chr10:73508512-75422550_10	chr10:74183251:rs7069357:A:G	-5.46069	0.0147258	0.0190541		gene;var:DNAJB12|
chr10:73508512-75422550_10	chr10:74233409:rs7080400:C:G	-5.49709	0.0147341	0.0190493		gene;var:MICU1|
chr10:73508512-75422550_10	chr10:74221205:rs7906117:A:T	-5.49746	0.0147327	0.0190473		gene;var:MICU1|
chr10:73508512-75422550_10	chr10:74493475:rs1010906:A:C	-5.92905	0.0148456	0.0190472		gene;var:MIR4676|
chr10:73508512-75422550_10	chr10:74139683:rs11000277:T:C	-6.28422	0.0148032	0.0190437		gene;var:DNAJB12|
chr10:73508512-75422550_10	chr10:74463863:rs3009552:A:G	-5.94315	0.0148434	0.0190432		gene;var:MCU|
chr10:73508512-75422550_10	chr10:74230994:rs7070240:T:C	-5.49861	0.0147284	0.0190414		gene;var:MICU1|
chr10:73508512-75422550_10	chr10:74224319:rs2065813:A:G	-5.49921	0.0147261	0.0190382		gene;var:MICU1|
chr10:73508512-75422550_10	chr10:74462808:rs3009553:T:C	-5.93927	0.0148481	0.0190374		gene;var:MCU|
chr10:73508512-75422550_10	chr10:74024873:rs10733885:T:G	-5.9021	0.0265469	0.0190357	peak|	gene;var:DDIT4|
chr10:73508512-75422550_10	chr10:74393912:rs3009524:A:T	-5.93127	0.0148325	0.0190352		gene;var:MICU1|
chr10:73508512-75422550_10	chr10:74482908:rs9415074:T:C	-5.92064	0.0148284	0.0190231		gene;var:MIR4676|
chr10:73508512-75422550_10	chr10:74177257:rs7922485:A:T	-6.33054	0.0147602	0.0190217		gene;var:DNAJB12|
chr10:73508512-75422550_10	chr10:74595005:rs7093820:A:G	-5.91449	0.0148354	0.0190204		gene;var:OIT3|
chr10:73508512-75422550_10	chr10:74228211:rs11000318:A:T	-5.51727	0.0147156	0.0190194		gene;var:MICU1|
chr10:73508512-75422550_10	chr10:74175415:rs1034289:T:C	-6.25481	0.014792	0.0190093		gene;var:DNAJB12|
chr10:73508512-75422550_10	chr10:74481952:rs2921447:A:G	-5.52088	0.0148017	0.019008		gene;var:MIR4676|
chr10:73508512-75422550_10	chr10:74159165:rs11000287:T:C	-6.2543	0.0147899	0.0190065		gene;var:DNAJB12|
chr10:73508512-75422550_10	chr10:74178677:rs11000293:T:C	-6.32729	0.0147472	0.0190042		gene;var:DNAJB12|
chr10:73508512-75422550_10	chr10:74482123:rs3009547:T:C	-5.93193	0.014817	0.0189993		gene;var:MIR4676|
chr10:73508512-75422550_10	chr10:74533652:rs2121095:T:G	-5.92327	0.0148132	0.0189953		gene;var:MIR4676|
chr10:73508512-75422550_10	chr10:74172909:rs7904455:T:C	-6.25132	0.0147776	0.0189908		gene;var:DNAJB12|
chr10:73508512-75422550_10	chr10:74140000:rs11593719:A:T	-6.27439	0.0267167	0.0189907	peak|	gene;var:DNAJB12|
chr10:73508512-75422550_10	chr10:74581534:rs2166336:A:G	-5.91598	0.0148033	0.0189905		gene;var:OIT3|
chr10:73508512-75422550_10	chr10:74454083:rs3009557:A:G	-5.93297	0.0148007	0.0189905		gene;var:MCU|
chr10:73508512-75422550_10	chr10:73992040:rs7913447:A:C	-5.68646	0.0266659	0.0189856	peak|	gene;var:ASCC1|
chr10:73508512-75422550_10	chr10:74241524:rs2152477:T:C	-5.51219	0.0146789	0.0189727		gene;var:MICU1|
chr10:73508512-75422550_10	chr10:74138665:rs4322309:A:T	-6.36119	0.0146994	0.0189703		gene;var:DNAJB12|
chr10:73508512-75422550_10	chr10:74142143:rs11000279:T:C	-6.26882	0.0147518	0.0189695		gene;var:DNAJB12|
chr10:73508512-75422550_10	chr10:74173379:rs6415906:T:C	-6.32441	0.0147203	0.0189688		gene;var:DNAJB12|
chr10:73508512-75422550_10	chr10:74173864:rs10823921:A:G	-6.24618	0.0147569	0.0189642		gene;var:DNAJB12|
chr10:73508512-75422550_10	chr10:74377776:rs3000963:T:G	-5.92991	0.0147807	0.018964		gene;var:MICU1|
chr10:73508512-75422550_10	chr10:74141852:rs12777437:T:C	-6.26733	0.0147459	0.0189618		gene;var:DNAJB12|
chr10:73508512-75422550_10	chr10:74473287:rs3009549:T:C	-5.92447	0.0147863	0.0189618		gene;var:MIR4676|
chr10:73508512-75422550_10	chr10:74225006:rs7923595:T:C	-5.5157	0.0146666	0.0189556		gene;var:MICU1|
chr10:73508512-75422550_10	chr10:74015776:rs11000235:A:G	-5.85711	0.0264547	0.0189459	peak|	gene;var:DDIT4|
chr10:73508512-75422550_10	chr10:74246613:rs7908177:T:G	-5.51773	0.0146596	0.0189458		gene;var:MICU1|
chr10:73508512-75422550_10	chr10:74165815:rs12783613:A:T	-6.24157	0.0147387	0.0189409		gene;var:DNAJB12|
chr10:73508512-75422550_10	chr10:74386300:rs3009529:A:C	-5.91663	0.0340283	0.0189372	Promoter|peak|	gene;var:MICU1|	10:74386300:A:C:MICU1|
chr10:73508512-75422550_10	chr10:74240537:rs3998175:T:C	-5.52099	0.0146484	0.0189302		gene;var:MICU1|
chr10:73508512-75422550_10	chr10:74245381:rs11816882:T:C	-5.5212	0.0146477	0.0189293		gene;var:MICU1|
chr10:73508512-75422550_10	chr10:74371894:rs3009535:A:G	-5.92353	0.0147462	0.0189254		gene;var:MICU1|
chr10:73508512-75422550_10	chr10:74163040:rs7075517:T:C	-6.23708	0.0147214	0.0189188		gene;var:DNAJB12|
chr10:73508512-75422550_10	chr10:74161285:rs10823920:A:G	-6.31299	0.014678	0.0189115		gene;var:DNAJB12|
chr10:73508512-75422550_10	chr10:74182917:rs10823922:T:C	-5.49045	0.0146212	0.0189067		gene;var:DNAJB12|
chr10:73508512-75422550_10	chr10:74522959:rs1867651:A:G	-5.89757	0.0147302	0.0189007		gene;var:MIR4676|
chr10:73508512-75422550_10	chr10:74363613:rs5013010:C:G	-5.91749	0.0147048	0.0188945		gene;var:MICU1|
chr10:73508512-75422550_10	chr10:74051642:rs4747244:C:G	-6.00579	0.026491	0.0188939	peak|	gene;var:DDIT4|
chr10:73508512-75422550_10	chr10:74379740:rs3000967:T:C	-5.91529	0.0147236	0.0188939		gene;var:MICU1|
chr10:73508512-75422550_10	chr10:74357917:rs3009544:T:C	-5.91504	0.0147226	0.0188927		gene;var:MIR1256|
chr10:73508512-75422550_10	chr10:74290074:rs1034292:A:G	-5.92182	0.0147126	0.018889		gene;var:MICU1|
chr10:73508512-75422550_10	chr10:74186249:rs4427488:A:G	-5.49487	0.0146069	0.0188864		gene;var:DNAJB12|
chr10:73508512-75422550_10	chr10:74366759:rs3009536:T:C	-5.91633	0.0147092	0.0188862		gene;var:MICU1|
chr10:73508512-75422550_10	chr10:74366699:rs3009537:T:C	-5.91618	0.0147086	0.0188855		gene;var:MICU1|
chr10:73508512-75422550_10	chr10:74176311:rs12771888:A:G	-6.30716	0.0146574	0.0188837		gene;var:DNAJB12|
chr10:73508512-75422550_10	chr10:74458302:rs3009555:A:G	-5.90714	0.0147186	0.0188792		gene;var:MCU|
chr10:73508512-75422550_10	chr10:74177771:rs12779570:T:C	-6.22784	0.0146869	0.0188747		gene;var:DNAJB12|
chr10:73508512-75422550_10	chr10:74364772:rs3009538:T:C	-5.91311	0.0146887	0.0188744		gene;var:MICU1|
chr10:73508512-75422550_10	chr10:74197019:rs3998173:T:G	-5.49285	0.0145989	0.0188737		gene;var:DNAJB12|
chr10:73508512-75422550_10	chr10:74188126:rs36077116:T:C	-5.49912	0.0145934	0.0188672		gene;var:DNAJB12|
chr10:73508512-75422550_10	chr10:74360439:rs3009542:T:C	-5.90479	0.0146848	0.0188464		gene;var:MIR1256|
chr10:73508512-75422550_10	chr10:74378202:rs3000964:A:G	-5.91223	0.0146776	0.0188458		gene;var:MICU1|
chr10:73508512-75422550_10	chr10:74303430:rs2152476:A:G	-5.90353	0.0146802	0.0188408		gene;var:MICU1|
chr10:73508512-75422550_10	chr10:74184400:rs7073943:A:G	-5.50826	0.0145653	0.0188272		gene;var:DNAJB12|
chr10:73508512-75422550_10	chr10:74185144:rs7096539:T:C	-5.50938	0.0263557	0.0188225	peak|	gene;var:DNAJB12|
chr10:73508512-75422550_10	chr10:74031694:rs6480608:T:C	-6.08931	0.0145359	0.018814		gene;var:DDIT4|
chr10:73508512-75422550_10	chr10:74246258:rs6415909:T:C	-5.54725	0.0145647	0.0188131		gene;var:MICU1|
chr10:73508512-75422550_10	chr10:74052013:rs7099642:C:G	-6.028	0.0145746	0.0188117		gene;var:DDIT4|
chr10:73508512-75422550_10	chr10:74343366:rs7909573:T:C	-5.89761	0.0146424	0.0188038		gene;var:MIR1256|
chr10:73508512-75422550_10	chr10:74282872:rs12781793:A:T	-5.89681	0.0337656	0.0188004	Promoter|peak|	gene;var:MICU1|	10:74282872:A:T:MICU1|
chr10:73508512-75422550_10	chr10:74301725:rs915434:T:C	-5.89228	0.0146409	0.0187928		gene;var:MICU1|
chr10:73508512-75422550_10	chr10:74291131:rs11000340:A:G	-5.8918	0.0146393	0.0187908		gene;var:MICU1|
chr10:73508512-75422550_10	chr10:74281184:rs10823934:C:G	-5.87778	0.0146258	0.0187853		gene;var:MICU1|
chr10:73508512-75422550_10	chr10:74368093:rs3000959:A:G	-5.89237	0.0264686	0.018782	peak|	gene;var:MICU1|	10:74368093:A:G:MICU1|
chr10:73508512-75422550_10	chr10:74374429:rs3009533:A:G	-5.89561	0.0146204	0.0187753		gene;var:MICU1|
chr10:73508512-75422550_10	chr10:74539882:rs11000411:A:G	-5.86136	0.0146329	0.0187742		gene;var:MIR4676|
chr10:73508512-75422550_10	chr10:74373274:rs3009534:A:G	-5.89363	0.0146139	0.0187673		gene;var:MICU1|
chr10:73508512-75422550_10	chr10:74369665:rs11598543:T:C	-5.88787	0.0146099	0.0187638		gene;var:MICU1|
chr10:73508512-75422550_2	chr10:74142159:rs11000280:T:C	-6.22362	0.0145916	0.0187629		gene;var:DNAJB12|
chr10:73508512-75422550_10	chr10:74285299:rs7901986:T:C	-5.89189	0.0264232	0.0187614	peak|	gene;var:MICU1|	10:74285299:T:C:MICU1|
chr10:73508512-75422550_10	chr10:74276793:rs11000336:A:C	-5.87517	0.0146068	0.0187593		gene;var:MICU1|
chr10:73508512-75422550_10	chr10:74379602:rs3000966:T:G	-5.88581	0.0146033	0.0187556		gene;var:MICU1|
chr10:73508512-75422550_10	chr10:74187061:rs34995195:T:C	-5.52628	0.0145137	0.0187534		gene;var:DNAJB12|
chr10:73508512-75422550_10	chr10:74054590:rs7075993:C:G	-6.0585	0.0262887	0.0187506	peak|	gene;var:DDIT4|
chr10:73508512-75422550_10	chr10:74248908:rs11000327:T:C	-5.55388	0.014521	0.0187481		gene;var:MICU1|
chr10:73508512-75422550_10	chr10:74284729:rs2065810:T:C	-5.88067	0.0336804	0.018746	Promoter|	gene;var:MICU1|	10:74284729:T:C:MICU1|
chr10:73508512-75422550_10	chr10:74380211:rs3000968:T:C	-5.87015	0.014601	0.0187433		gene;var:MICU1|
chr10:73508512-75422550_10	chr10:74497403:rs3009548:A:G	-5.87782	0.0145991	0.0187431		gene;var:MIR4676|
chr10:73508512-75422550_10	chr10:74068978:rs4495815:T:G	-6.19412	0.0144803	0.0187431		gene;var:DDIT4|
chr10:73508512-75422550_10	chr10:74148130:rs4623817:A:G	-6.27921	0.0145552	0.0187424		gene;var:DNAJB12|
chr10:73508512-75422550_10	chr10:74354848:rs10823936:T:C	-5.88202	0.0145911	0.0187407		gene;var:MIR1256|
chr10:73508512-75422550_10	chr10:74181312:rs12769504:T:C	-6.07944	0.0145889	0.0187398		gene;var:DNAJB12|
chr10:73508512-75422550_10	chr10:74069126:rs4409753:T:C	-6.1378	0.0144899	0.0187369		gene;var:DDIT4|
chr10:73508512-75422550_10	chr10:74541515:rs7071796:T:C	-5.85445	0.014595	0.0187369		gene;var:MIR4676|
chr10:73508512-75422550_10	chr10:74175883:rs7917682:A:C	-6.26703	0.0145446	0.0187306		gene;var:DNAJB12|
chr10:73508512-75422550_10	chr10:74287741:rs1972252:A:G	-5.87842	0.0145799	0.0187269		gene;var:MICU1|
chr10:73508512-75422550_10	chr10:74268031:rs3793927:T:C	-5.88983	0.0145841	0.0187264		gene;var:MICU1|
chr10:73508512-75422550_10	chr10:74387198:rs3000972:T:C	-5.89142	0.0263905	0.0187245	peak|	gene;var:MICU1|	10:74387198:T:C:MICU1|
chr10:73508512-75422550_10	chr10:74281703:rs1889797:T:C	-5.876	0.0145724	0.0187177		gene;var:MICU1|
chr10:73508512-75422550_10	chr10:74042601:rs11000248:A:G	-6.07838	0.014478	0.0187144		gene;var:DDIT4|
chr10:73508512-75422550_10	chr10:74284025:rs7897114:T:C	-5.87506	0.0336052	0.0187142	Promoter|	gene;var:MICU1|	10:74284025:T:C:MICU1|
chr10:73508512-75422550_10	chr10:74283057:rs11815614:T:C	-5.87478	0.0336033	0.0187132	Promoter|peak|	gene;var:MICU1|	10:74283057:T:C:MICU1|
chr10:73508512-75422550_10	chr10:74235897:rs11000323:A:G	-5.54635	0.0144926	0.0187098		gene;var:MICU1|
chr10:73508512-75422550_10	chr10:74067312:rs10762511:T:C	-6.17398	0.0144635	0.0187086		gene;var:DDIT4|
chr10:73508512-75422550_10	chr10:74378437:rs10823937:A:T	-5.49732	0.0145606	0.0187083		gene;var:MICU1|
chr10:73508512-75422550_10	chr10:74067344:rs10823913:A:G	-6.17472	0.0144626	0.0187075		gene;var:DDIT4|
chr10:73508512-75422550_10	chr10:74539534:rs12359667:A:C	-5.82533	0.0145777	0.0187068		gene;var:MIR4676|
chr10:73508512-75422550_10	chr10:74177199:rs12358554:A:G	-6.25959	0.0145243	0.0187035		gene;var:DNAJB12|
chr10:73508512-75422550_10	chr10:74176218:rs7918099:A:G	-6.25951	0.0145241	0.0187032		gene;var:DNAJB12|
chr10:73508512-75422550_10	chr10:74068696:rs4300326:T:C	-6.19194	0.0144509	0.0186947		gene;var:DDIT4|
chr10:73508512-75422550_10	chr10:74068076:rs3924190:C:G	-6.22629	0.014435	0.0186876		gene;var:DDIT4|
chr10:73508512-75422550_10	chr10:74195601:rs7893607:A:G	-5.53941	0.014468	0.0186864		gene;var:DNAJB12|
chr10:73508512-75422550_10	chr10:74254605:rs997969:A:C	-5.55748	0.0144683	0.0186849		gene;var:MICU1|
chr10:73508512-75422550_2	chr10:74181368:rs11812792:T:C	-6.07001	0.0145438	0.018683		gene;var:DNAJB12|
chr10:73508512-75422550_10	chr10:74174903:rs12354649:A:G	-6.25337	0.0145082	0.0186818		gene;var:DNAJB12|
chr10:73508512-75422550_10	chr10:74151885:rs7081900:T:C	-6.2577	0.0145079	0.0186784		gene;var:DNAJB12|
chr10:73508512-75422550_10	chr10:74251138:rs10823929:A:G	-5.57285	0.0144715	0.0186783		gene;var:MICU1|
chr10:73508512-75422550_10	chr10:74284719:rs2065811:T:C	-5.86988	0.033539	0.0186777	Promoter|	gene;var:MICU1|	10:74284719:T:C:MICU1|
chr10:73508512-75422550_10	chr10:74068998:rs4433500:A:G	-6.20485	0.0144327	0.0186744		gene;var:DDIT4|
chr10:73508512-75422550_10	chr10:74142952:rs4350287:T:C	-6.28469	0.0144884	0.0186696		gene;var:DNAJB12|
chr10:73508512-75422550_10	chr10:74297976:rs4601686:A:C	-5.86747	0.0145336	0.0186692		gene;var:MICU1|
chr10:73508512-75422550_10	chr10:74274216:rs12412460:T:C	-5.87691	0.0145306	0.0186691		gene;var:MICU1|
chr10:73508512-75422550_10	chr10:74068151:rs4275534:T:C	-6.24592	0.0144172	0.0186691		gene;var:DDIT4|
chr10:73508512-75422550_10	chr10:74235771:rs11000322:A:G	-5.58567	0.0144613	0.0186669		gene;var:MICU1|
chr10:73508512-75422550_10	chr10:74067286:rs10762510:T:C	-6.22215	0.0144222	0.0186667		gene;var:DDIT4|
chr10:73508512-75422550_10	chr10:74184015:rs7091516:T:C	-5.55047	0.0144523	0.0186646		gene;var:DNAJB12|
chr10:73508512-75422550_10	chr10:74604210:rs10823945:C:G	-5.46367	0.0145311	0.0186643		gene;var:OIT3|
chr10:73508512-75422550_10	chr10:74291244:rs11000341:A:G	-5.86082	0.0145276	0.0186631		gene;var:MICU1|
chr10:73508512-75422550_2	chr10:74300244:rs7921296:A:C	-5.86527	0.0145274	0.0186616		gene;var:MICU1|
chr10:73508512-75422550_10	chr10:74235910:rs7917451:A:G	-5.63694	0.0144712	0.018657		gene;var:MICU1|
chr10:73508512-75422550_10	chr10:74153278:rs6480619:A:G	-6.25078	0.0262273	0.0186558	peak|	gene;var:DNAJB12|
chr10:73508512-75422550_10	chr10:74251884:rs7919788:C:G	-5.57404	0.0144563	0.0186558		gene;var:MICU1|
chr10:73508512-75422550_2	chr10:74285263:rs7902196:A:G	-5.86332	0.0262834	0.018655	peak|	gene;var:MICU1|	10:74285263:A:G:MICU1|
chr10:73508512-75422550_2	chr10:74302168:rs915435:T:C	-5.86303	0.0145211	0.018654		gene;var:MICU1|
chr10:73508512-75422550_2	chr10:74302584:rs6480626:A:C	-5.85813	0.0262803	0.0186539	peak|	gene;var:MICU1|	10:74302584:A:C:MICU1|
chr10:73508512-75422550_10	chr10:74534174:rs6480643:T:C	-5.83147	0.0145258	0.0186532		gene;var:MIR4676|
chr10:73508512-75422550_10	chr10:74255475:rs7902569:T:G	-5.58227	0.014449	0.0186463		gene;var:MICU1|
chr10:73508512-75422550_2	chr10:74463401:rs2395013:A:G	-5.84677	0.0145071	0.0186317		gene;var:MCU|
chr10:73508512-75422550_10	chr10:74318562:rs6480627:A:T	-5.50914	0.026265	0.0186312	peak|	gene;var:MICU1|	10:74318562:A:T:MICU1|
chr10:73508512-75422550_10	chr10:74041547:rs4747243:A:T	-6.05733	0.0144247	0.0186286		gene;var:DDIT4|
chr10:73508512-75422550_2	chr10:74287125:rs7086765:T:G	-5.85472	0.0144984	0.0186265		gene;var:MICU1|
chr10:73508512-75422550_10	chr10:74234817:rs915432:T:C	-5.67425	0.0144456	0.0186231		gene;var:MICU1|
chr10:73508512-75422550_2	chr10:74279477:rs1414533:A:G	-5.85337	0.0144948	0.0186222		gene;var:MICU1|
chr10:73508512-75422550_2	chr10:74279525:rs7342059:A:T	-5.85337	0.0144948	0.0186222		gene;var:MICU1|
chr10:73508512-75422550_2	chr10:74271553:rs10823933:T:C	-5.86758	0.0144925	0.0186216		gene;var:MICU1|
chr10:73508512-75422550_2	chr10:74293584:rs10509343:A:T	-5.85231	0.014492	0.0186188		gene;var:MICU1|
chr10:73508512-75422550_2	chr10:74302649:rs7899516:C:G	-5.84667	0.0262246	0.0186164	peak|	gene;var:MICU1|	10:74302649:C:G:MICU1|
chr10:73508512-75422550_2	chr10:74292575:rs11000344:T:C	-5.85152	0.01449	0.0186163		gene;var:MICU1|
chr10:73508512-75422550_2	chr10:74292273:rs11815645:C:G	-5.84631	0.0144883	0.0186152		gene;var:MICU1|
chr10:73508512-75422550_2	chr10:74294284:rs7095187:A:G	-5.84624	0.0144881	0.018615		gene;var:MICU1|
chr10:73508512-75422550_2	chr10:74278115:rs2184666:T:G	-5.85091	0.0144884	0.0186143		gene;var:MICU1|
chr10:73508512-75422550_2	chr10:74376424:rs3000962:A:C	-5.84463	0.0144839	0.01861		gene;var:MICU1|
chr10:73508512-75422550_2	chr10:74271590:rs11000335:A:C	-5.85675	0.0144765	0.0186032		gene;var:MICU1|
chr10:73508512-75422550_2	chr10:74293601:rs11818304:A:T	-5.84631	0.0144766	0.0186001		gene;var:MICU1|
chr10:73508512-75422550_10	chr10:74299666:rs7917643:T:C	-5.84562	0.0144748	0.018598		gene;var:MICU1|
chr10:73508512-75422550_2	chr10:74484114:rs3009546:T:C	-5.83334	0.0144845	0.0185979		gene;var:MIR4676|
chr10:73508512-75422550_10	chr10:74276088:rs7093346:A:G	-5.85956	0.014472	0.0185966		gene;var:MICU1|
chr10:73508512-75422550_2	chr10:74531544:rs6480642:T:G	-5.8169	0.0144747	0.0185907		gene;var:MIR4676|
chr10:73508512-75422550_10	chr10:74250792:rs7912170:A:G	-5.59731	0.0144052	0.018583		gene;var:MICU1|
chr10:73508512-75422550_10	chr10:74299749:rs7902964:T:G	-5.83845	0.0144572	0.0185767		gene;var:MICU1|
chr10:73508512-75422550_10	chr10:74530207:rs6480640:A:G	-5.81009	0.0144578	0.0185707		gene;var:MIR4676|
chr10:73508512-75422550_10	chr10:74340303:rs2050527:T:C	-5.8305	0.0144491	0.018568		gene;var:MIR1256|
chr10:73508512-75422550_10	chr10:74491809:rs2921449:A:G	-5.84979	0.01445	0.0185654		gene;var:MIR4676|
chr10:73508512-75422550_10	chr10:74222847:rs11000313:A:G	-5.57836	0.0143838	0.0185631		gene;var:MICU1|
chr10:73508512-75422550_10	chr10:74418234:rs3009566:T:G	-5.80913	0.0144475	0.0185577		gene;var:MICU1|
chr10:73508512-75422550_10	chr10:74269791:rs7350413:T:C	-5.84558	0.0144386	0.0185563		gene;var:MICU1|
chr10:73508512-75422550_10	chr10:74224647:rs4561121:T:C	-5.5819	0.0143773	0.0185534		gene;var:MICU1|
chr10:73508512-75422550_10	chr10:74252017:rs7919938:C:G	-5.59059	0.0143792	0.0185452		gene;var:MICU1|
chr10:73508512-75422550_10	chr10:74347719:rs7896365:T:G	-5.99595	0.0144201	0.0185431		gene;var:MIR1256|
chr10:73508512-75422550_10	chr10:74201126:rs11000299:C:G	-5.58619	0.0143697	0.0185419		gene;var:MICU1|
chr10:73508512-75422550_10	chr10:74375734:rs3009532:A:G	-5.81556	0.0144261	0.0185347		gene;var:MICU1|
chr10:73508512-75422550_10	chr10:74314296:rs12412815:T:C	-5.99308	0.0144168	0.0185335		gene;var:MICU1|
chr10:73508512-75422550_10	chr10:74243076:rs7894048:T:C	-5.59074	0.0259954	0.0185301	peak|	gene;var:MICU1|	10:74243076:T:C:MICU1|
chr10:73508512-75422550_10	chr10:74206576:rs11000301:A:G	-5.59082	0.0143617	0.01853		gene;var:MICU1|
chr10:73508512-75422550_10	chr10:74320189:rs7093530:T:C	-5.99143	0.0144133	0.018529		gene;var:MICU1|
chr10:73508512-75422550_10	chr10:74210239:rs11000309:T:C	-5.5926	0.0143588	0.0185255		gene;var:MICU1|
chr10:73508512-75422550_10	chr10:74201671:rs2105082:T:C	-5.59907	0.0143556	0.0185214		gene;var:MICU1|
chr10:73508512-75422550_10	chr10:74254610:rs997423:A:C	-5.61313	0.0143555	0.0185193		gene;var:MICU1|
chr10:73508512-75422550_10	chr10:74347059:rs11000361:T:C	-5.98643	0.0144002	0.0185172		gene;var:MIR1256|
chr10:73508512-75422550_10	chr10:74136946:rs10823917:C:G	-6.13372	0.0143942	0.0185121		gene;var:DNAJB12|
chr10:73508512-75422550_10	chr10:74201938:rs59612669:A:G	-5.60347	0.0143486	0.0185107		gene;var:MICU1|
chr10:73508512-75422550_10	chr10:74319511:rs2152473:A:T	-5.96731	0.0143922	0.0185054		gene;var:MICU1|
chr10:73508512-75422550_10	chr10:74224125:rs2065812:T:C	-5.60355	0.0143415	0.0184992		gene;var:MICU1|
chr10:73508512-75422550_10	chr10:74224441:rs2065814:A:C	-5.60355	0.0143415	0.0184992		gene;var:MICU1|
chr10:73508512-75422550_10	chr10:74485709:rs1123641:A:C	-5.79873	0.0143944	0.0184977		gene;var:MIR4676|
chr10:73508512-75422550_10	chr10:74347269:rs7910380:A:T	-5.96623	0.0143857	0.0184963		gene;var:MIR1256|
chr10:73508512-75422550_10	chr10:74154894:rs28840397:A:G	-6.13351	0.0143722	0.0184901		gene;var:DNAJB12|
chr10:73508512-75422550_10	chr10:74204929:rs1004256:A:G	-5.61243	0.0143352	0.0184901		gene;var:MICU1|
chr10:73508512-75422550_10	chr10:74182400:rs11000295:A:G	-5.59439	0.0143319	0.0184849		gene;var:DNAJB12|
chr10:73508512-75422550_10	chr10:74259515:rs7071469:T:C	-5.63664	0.0143375	0.0184842		gene;var:MICU1|
chr10:73508512-75422550_10	chr10:74141039:rs7903091:T:C	-6.14919	0.0259952	0.0184833	peak|	gene;var:DNAJB12|
chr10:73508512-75422550_10	chr10:74321498:rs7905119:A:G	-5.97163	0.014368	0.0184748		gene;var:MICU1|
chr10:73508512-75422550_10	chr10:74228838:rs34727046:T:C	-5.61479	0.0143257	0.0184747		gene;var:MICU1|
chr10:73508512-75422550_10	chr10:74486318:rs1900135:T:C	-5.78563	0.0143697	0.0184692		gene;var:MIR4676|
chr10:73508512-75422550_10	chr10:74162204:rs7910744:A:C	-6.11886	0.0143525	0.0184655		gene;var:DNAJB12|
chr10:73508512-75422550_10	chr10:74326047:rs10823935:A:G	-5.73371	0.0143562	0.018452		gene;var:MIR1256|
chr10:73508512-75422550_10	chr10:74248959:rs11000328:A:C	-5.63184	0.0143108	0.01845		gene;var:MICU1|
chr10:73508512-75422550_10	chr10:74459274:rs7100909:A:G	-5.77542	0.0143524	0.0184492		gene;var:MCU|
chr10:73508512-75422550_10	chr10:74346781:rs7923315:T:C	-5.95796	0.0143457	0.0184458		gene;var:MIR1256|
chr10:73508512-75422550_10	chr10:74317852:rs1034290:T:G	-5.95561	0.0143422	0.0184412		gene;var:MICU1|
chr10:73508512-75422550_10	chr10:74320510:rs6480628:T:C	-5.95292	0.0143416	0.0184409		gene;var:MICU1|
chr10:73508512-75422550_10	chr10:74325858:rs12784366:A:G	-5.71766	0.0143378	0.0184317		gene;var:MIR1256|
chr10:73508512-75422550_10	chr10:74143137:rs7070518:A:G	-6.07707	0.0143176	0.0184221		gene;var:DNAJB12|
chr10:73508512-75422550_10	chr10:74350344:rs12783297:A:G	-5.70433	0.0143256	0.0184147		gene;var:MIR1256|
chr10:73508512-75422550_10	chr10:74314665:rs12412887:A:G	-5.93733	0.0143221	0.0184127		gene;var:MICU1|
chr10:73508512-75422550_10	chr10:74350282:rs34906646:A:G	-5.68805	0.0143197	0.0184074		gene;var:MIR1256|
chr10:73508512-75422550_10	chr10:74382898:rs3000970:A:G	-5.75222	0.0143062	0.0184006		gene;var:MICU1|
chr10:73508512-75422550_10	chr10:74350129:rs11000363:T:C	-5.68593	0.0143026	0.0183902		gene;var:MIR1256|
chr10:73508512-75422550_10	chr10:74310651:rs11812132:A:G	-5.5798	0.0329256	0.0183832	Promoter|	gene;var:MICU1|	10:74310651:A:G:MICU1|
chr10:73508512-75422550_10	chr10:74357096:rs3000986:T:C	-5.68037	0.0142918	0.0183814		gene;var:MIR1256|
chr10:73508512-75422550_10	chr10:74353076:rs56280550:A:G	-5.67961	0.014291	0.0183806		gene;var:MIR1256|
chr10:73508512-75422550_10	chr10:74351250:rs7914278:C:G	-5.67885	0.0142903	0.0183799		gene;var:MIR1256|
chr10:73508512-75422550_10	chr10:74256975:rs7086396:A:G	-5.71224	0.0142716	0.0183785		gene;var:MICU1|
chr10:73508512-75422550_10	chr10:74328058:rs3929848:A:G	-5.66632	0.0142895	0.0183782		gene;var:MIR1256|
chr10:73508512-75422550_10	chr10:74312272:rs11000348:A:G	-5.58315	0.014268	0.0183754		gene;var:MICU1|
chr10:73508512-75422550_10	chr10:74261629:rs12359933:A:T	-5.71042	0.0142689	0.0183747		gene;var:MICU1|
chr10:73508512-75422550_10	chr10:74306164:rs7077100:T:C	-5.67314	0.0142828	0.0183726		gene;var:MICU1|
chr10:73508512-75422550_10	chr10:74327657:rs1414532:A:G	-5.6655	0.0142829	0.0183706		gene;var:MIR1256|
chr10:73508512-75422550_10	chr10:74262555:rs12783031:A:G	-5.71988	0.0142679	0.0183703		gene;var:MICU1|
chr10:73508512-75422550_10	chr10:74355869:rs61864370:A:C	-5.6669	0.0142802	0.0183698		gene;var:MIR1256|
chr10:73508512-75422550_10	chr10:74350307:rs7909759:A:G	-5.66168	0.0142813	0.0183696		gene;var:MIR1256|
chr10:73508512-75422550_10	chr10:74351467:rs7914437:A:T	-5.66655	0.0142799	0.0183695		gene;var:MIR1256|
chr10:73508512-75422550_10	chr10:74262133:rs10823932:T:C	-5.72229	0.0142679	0.0183695		gene;var:MICU1|
chr10:73508512-75422550_10	chr10:74261963:rs10823931:A:C	-5.72358	0.0142679	0.0183691		gene;var:MICU1|
chr10:73508512-75422550_10	chr10:74262900:rs11000331:T:C	-5.72407	0.0142679	0.018369		gene;var:MICU1|
chr10:73508512-75422550_10	chr10:74262292:rs11597525:T:C	-5.72571	0.0142679	0.0183685		gene;var:MICU1|
chr10:73508512-75422550_10	chr10:74324837:rs10762516:A:G	-5.66387	0.014278	0.0183676		gene;var:MIR1256|
chr10:73508512-75422550_10	chr10:74326898:rs7899897:C:G	-5.66375	0.0142779	0.0183676		gene;var:MIR1256|
chr10:73508512-75422550_10	chr10:74265325:rs12778889:A:C	-5.72654	0.0142688	0.0183645		gene;var:MICU1|
chr10:73508512-75422550_10	chr10:74308804:rs11815867:T:C	-5.6015	0.0142619	0.0183627		gene;var:MICU1|
chr10:73508512-75422550_10	chr10:74349913:rs7894619:T:C	-5.65616	0.0142704	0.0183607		gene;var:MIR1256|
chr10:73508512-75422550_10	chr10:74337058:rs7097413:A:G	-5.61166	0.0329001	0.0183603	Promoter|	gene;var:MIR1256|
chr10:73508512-75422550_10	chr10:74338696:rs6480632:T:C	-5.64952	0.0142692	0.0183599		gene;var:MIR1256|
chr10:73508512-75422550_10	chr10:74309215:rs56084598:T:G	-5.60807	0.0258137	0.0183598	peak|	gene;var:MICU1|	10:74309215:T:G:MICU1|
chr10:73508512-75422550_10	chr10:74337923:rs12781837:A:C	-5.61435	0.0142609	0.0183593		gene;var:MIR1256|
chr10:73508512-75422550_10	chr10:74352636:rs6480634:A:G	-5.64655	0.0142678	0.0183588		gene;var:MIR1256|
chr10:73508512-75422550_10	chr10:74332472:rs6480631:A:G	-5.612	0.0142606	0.0183584		gene;var:MIR1256|
chr10:73508512-75422550_10	chr10:74334123:rs2065815:A:C	-5.61852	0.0258132	0.0183579	peak|	gene;var:MIR1256|
chr10:73508512-75422550_10	chr10:74323545:rs950688:T:G	-5.61879	0.0142607	0.0183578		gene;var:MICU1|
chr10:73508512-75422550_10	chr10:74354645:rs12415449:A:G	-5.64781	0.0142665	0.0183577		gene;var:MIR1256|
chr10:73508512-75422550_10	chr10:74309719:rs7082882:T:C	-5.62014	0.0142607	0.0183575		gene;var:MICU1|
chr10:73508512-75422550_10	chr10:74329742:rs12358098:T:C	-5.64158	0.0142657	0.0183574		gene;var:MIR1256|
chr10:73508512-75422550_10	chr10:74329570:rs12770378:A:G	-5.64137	0.0142641	0.0183564		gene;var:MIR1256|
chr10:73508512-75422550_10	chr10:74330725:rs11592595:A:T	-5.63585	0.0142637	0.0183563		gene;var:MIR1256|
chr10:73508512-75422550_10	chr10:74342328:rs7096575:A:C	-5.63585	0.0142637	0.0183563		gene;var:MIR1256|
chr10:73508512-75422550_10	chr10:74353488:rs6480635:A:G	-5.64056	0.0142639	0.0183563		gene;var:MIR1256|
chr10:73508512-75422550_10	chr10:74334758:rs6415911:A:G	-5.62251	0.0258137	0.0183561	peak|	gene;var:MIR1256|
chr10:73508512-75422550_10	chr10:74336731:rs7077828:T:C	-5.63242	0.0329038	0.0183559	Promoter|	gene;var:MIR1256|
chr10:73508512-75422550_10	chr10:74307517:rs953806:T:C	-5.6251	0.0142613	0.0183559		gene;var:MICU1|
chr10:73508512-75422550_10	chr10:74330026:rs7081876:T:C	-5.63575	0.0142626	0.0183558		gene;var:MIR1256|
chr10:73508512-75422550_10	chr10:74309485:rs12778560:T:G	-5.62669	0.0142615	0.0183558		gene;var:MICU1|
chr10:73508512-75422550_10	chr10:74310206:rs7070976:A:T	-5.62735	0.0329031	0.0183554	Promoter|	gene;var:MICU1|	10:74310206:A:T:MICU1|
chr10:73508512-75422550_10	chr10:74352092:rs6480633:A:G	-5.62538	0.014262	0.0183554		gene;var:MIR1256|
chr10:73508512-75422550_10	chr10:74430848:rs11000385:T:C	-5.54791	0.0142663	0.0183429		gene;var:MCU|
chr10:73508512-75422550_10	chr10:74279254:rs7342140:T:C	-5.52036	0.0142471	0.0183248		gene;var:MICU1|
chr10:75422550-78706814_1	chr10:77828085:rs10509363:C:G	6.9837	0.0939444	0.119287		gene;var:LRMDA|
chr10:75422550-78706814_1	chr10:77827155:rs7909137:T:G	6.95925	0.085335	0.108386		gene;var:LRMDA|
chr10:75422550-78706814_1	chr10:77830893:rs2007753:C:G	6.92656	0.072836	0.0925138		gene;var:LRMDA|
chr10:75422550-78706814_1	chr10:77819565:rs1898063:T:C	6.91762	0.0709385	0.0901597		gene;var:LRMDA|
chr10:75422550-78706814_1	chr10:77818035:rs1898082:A:G	6.91282	0.0699066	0.0888459		gene;var:LRMDA|
chr10:75422550-78706814_1	chr10:77819537:rs1898064:T:C	6.91084	0.0694895	0.0883146		gene;var:LRMDA|
chr10:75422550-78706814_2	chr10:75886512:rs7073435:T:C	5.69524	0.0639183	0.0862843		gene;var:AP3M1|
chr10:75422550-78706814_1	chr10:77807027:rs1898071:T:C	6.87701	0.387814	0.0861801	Exon|	gene;var:LRMDA|
chr10:75422550-78706814_1	chr10:77819030:rs2117792:A:G	6.89757	0.11878	0.0847741	peak|	gene;var:LRMDA|
chr10:75422550-78706814_1	chr10:77819631:rs1898062:A:G	6.89491	0.06635	0.0843134		gene;var:LRMDA|
chr10:75422550-78706814_1	chr10:77818699:rs7893490:A:G	6.88881	0.0652408	0.0828986		gene;var:LRMDA|
chr10:75422550-78706814_1	chr10:77818594:rs7924288:T:C	6.8819	0.06404	0.081366		gene;var:LRMDA|
chr10:75422550-78706814_1	chr10:77819200:rs3943749:A:C	6.88187	0.114014	0.0813608	peak|	gene;var:LRMDA|
chr10:75422550-78706814_1	chr10:77818984:rs2117793:T:C	6.89185	0.113374	0.0809307	peak|	gene;var:LRMDA|
chr10:75422550-78706814_2	chr10:75884964:rs7067855:T:C	5.6508	0.0600069	0.0807602		gene;var:AP3M1|
chr10:75422550-78706814_2	chr10:75892904:rs7919821:A:G	5.65494	0.0591892	0.079111		gene;var:AP3M1|
chr10:75422550-78706814_1	chr10:77828701:rs12256171:A:G	6.92851	0.0616236	0.0789529		gene;var:LRMDA|
chr10:75422550-78706814_2	chr10:75853796:rs10824069:T:C	5.58234	0.102076	0.076625	peak|	gene;var:AP3M1|	10:75853796:T:C:AP3M1|
chr10:75422550-78706814_2	chr10:75867633:rs1874150:T:C	5.55127	0.0572563	0.0765354		gene;var:AP3M1|
chr10:75422550-78706814_2	chr10:75861664:rs7912297:A:C	5.59337	0.101614	0.0758643	peak|	gene;var:AP3M1|	10:75861664:A:C:AP3M1|
chr10:75422550-78706814_1	chr10:77829115:rs1898059:A:T	6.90541	0.058374	0.0747064		gene;var:LRMDA|
chr10:75422550-78706814_2	chr10:75942734:rs4745741:T:C	5.59731	0.0555492	0.0738623		gene;var:ADK|
chr10:75422550-78706814_1	chr10:77817389:rs1898066:A:G	6.84124	0.0580724	0.0737338		gene;var:LRMDA|
chr10:75422550-78706814_2	chr10:75903081:rs6480719:T:G	5.61825	0.0990272	0.0735307	peak|	gene;var:AP3M1|	10:75903081:T:G:AP3M1|
chr10:75422550-78706814_2	chr10:75864372:rs2131959:C:G	5.55863	0.0551585	0.0734109		gene;var:AP3M1|
chr10:75422550-78706814_2	chr10:75939921:rs10733895:T:C	5.58975	0.0979784	0.072911	peak|	gene;var:ADK|	10:75939921:T:C:ADK|
chr10:75422550-78706814_2	chr10:76001229:rs7092741:T:C	5.50489	0.0550866	0.0729099		gene;var:ADK|
chr10:75422550-78706814_1	chr10:77829033:rs1898060:A:G	6.90293	0.0565968	0.0724082		gene;var:LRMDA|
chr10:75422550-78706814_2	chr10:75896601:rs10762576:A:C	5.58952	0.0541445	0.0717586		gene;var:AP3M1|
chr10:75422550-78706814_2	chr10:75936611:rs10824095:T:C	5.57397	0.12106	0.0710553	Promoter|	gene;var:ADK|	10:75936611:T:C:ADK|
chr10:75422550-78706814_2	chr10:75868114:rs3793921:T:C	5.50599	0.0954336	0.0707666	peak|	gene;var:AP3M1|	10:75868114:T:C:AP3M1|
chr10:75422550-78706814_2	chr10:75992453:rs7914783:A:G	5.48658	0.0536519	0.0707637		gene;var:ADK|
chr10:75422550-78706814_2	chr10:75884820:rs7080130:A:C	5.58845	0.0533564	0.0703322		gene;var:AP3M1|
chr10:75422550-78706814_2	chr10:75917833:rs7082003:A:T	5.55501	0.053437	0.0702538		gene;var:ADK|
chr10:75422550-78706814_2	chr10:75983842:rs10762586:T:C	5.50537	0.0529236	0.0697456		gene;var:ADK|
chr10:75422550-78706814_2	chr10:75997024:rs6480724:A:G	5.46986	0.0524637	0.0689924		gene;var:ADK|
chr10:75422550-78706814_2	chr10:75984756:rs10762587:A:G	5.46794	0.0523344	0.0687999		gene;var:ADK|
chr10:75422550-78706814_2	chr10:75999090:rs4451661:A:G	5.46751	0.0523057	0.0687573		gene;var:ADK|
chr10:75422550-78706814_2	chr10:76020096:rs6480728:T:C	5.52135	0.0520556	0.0685241		gene;var:ADK|
chr10:75422550-78706814_2	chr10:75879511:rs703258:A:T	5.56839	0.305088	0.0682774	3_UTR|	gene;var:AP3M1|	10:75879511:A:T:AP3M1|
chr10:75422550-78706814_2	chr10:75986541:rs2395078:T:C	5.46249	0.0519745	0.0682648		gene;var:ADK|
chr10:75422550-78706814_2	chr10:75985424:rs10824120:A:G	5.4623	0.0519622	0.0682466		gene;var:ADK|
chr10:75422550-78706814_2	chr10:75924605:rs7894143:C:G	5.54521	0.0517212	0.0680811		gene;var:ADK|
chr10:75422550-78706814_2	chr10:75961229:rs7895587:T:C	5.51861	0.0517597	0.0680131		gene;var:ADK|
chr10:75422550-78706814_2	chr10:75984006:rs10824119:C:G	5.45938	0.0517739	0.0679668		gene;var:ADK|
chr10:75422550-78706814_1	chr10:77829010:rs1898061:A:G	6.85519	0.0529199	0.0675648		gene;var:LRMDA|
chr10:75422550-78706814_2	chr10:75916861:rs6480721:A:G	5.5557	0.0919538	0.0674632	peak|	gene;var:ADK|	10:75916861:A:G:ADK|
chr10:75422550-78706814_2	chr10:75881676:rs6688:A:G	5.51343	0.301646	0.0673518	3_UTR|	gene;var:AP3M1|	10:75881676:A:G:AP3M1|
chr10:75422550-78706814_2	chr10:75989610:rs11000934:T:C	5.45267	0.0513528	0.0673418		gene;var:ADK|
chr10:75422550-78706814_2	chr10:75989752:rs10762589:T:C	5.4526	0.0513484	0.0673353		gene;var:ADK|
chr10:75422550-78706814_2	chr10:75956027:rs7087290:T:C	5.53496	0.0510924	0.0671366		gene;var:ADK|
chr10:75422550-78706814_2	chr10:75961136:rs7910153:C:G	5.5028	0.0509077	0.0668069		gene;var:ADK|
chr10:75422550-78706814_2	chr10:75949930:rs7915999:T:C	5.52109	0.0898507	0.0659472	peak|	gene;var:ADK|	10:75949930:T:C:ADK|
chr10:75422550-78706814_1	chr10:77806354:rs11001598:T:C	6.76808	0.0518788	0.0657995		gene;var:LRMDA|
chr10:75422550-78706814_1	chr10:77810890:rs7923665:T:C	6.7777	0.0516668	0.0655568		gene;var:LRMDA|
chr10:75422550-78706814_2	chr10:76018982:rs12243059:T:C	5.48779	0.0500644	0.065549		gene;var:ADK|
chr10:75422550-78706814_2	chr10:75969917:rs10128407:A:G	5.51444	0.0499405	0.0654106		gene;var:ADK|
chr10:75422550-78706814_1	chr10:77809660:rs1898068:A:C	6.76371	0.0514676	0.0652655		gene;var:LRMDA|
chr10:75422550-78706814_2	chr10:75871735:rs2131956:C:G	5.48993	0.293605	0.065053	Exon|DAR|peak|	gene;var:AP3M1|	10:75871735:C:G:AP3M1|
chr10:75422550-78706814_1	chr10:77833675:rs1898058:T:C	6.8426	0.0509369	0.0649766		gene;var:LRMDA|
chr10:75422550-78706814_2	chr10:75855842:rs4746172:T:C	5.50575	0.0497205	0.0649221		gene;var:AP3M1|
chr10:75422550-78706814_1	chr10:77829420:rs10824359:T:C	6.82898	0.0507725	0.0647456		gene;var:LRMDA|
chr10:75422550-78706814_2	chr10:75948420:rs10762581:A:C	5.50508	0.0494597	0.064692		gene;var:ADK|
chr10:75422550-78706814_2	chr10:75951509:rs7097778:A:G	5.50313	0.049363	0.0645475		gene;var:ADK|
chr10:75422550-78706814_2	chr10:75952903:rs7090732:T:C	5.50266	0.0493397	0.0645127		gene;var:ADK|
chr10:75422550-78706814_1	chr10:77827397:rs10824358:T:C	6.83389	0.0502646	0.0640899		gene;var:LRMDA|
chr10:75422550-78706814_1	chr10:77827934:rs10509362:A:G	6.82205	0.0502707	0.0640859		gene;var:LRMDA|
chr10:75422550-78706814_2	chr10:76016686:rs9971034:T:G	5.46325	0.0488364	0.0637236		gene;var:ADK|
chr10:75422550-78706814_1	chr10:77830523:rs754254:A:G	6.82912	0.0499341	0.0636543		gene;var:LRMDA|
chr10:75422550-78706814_1	chr10:77834448:rs11001605:T:C	6.82773	0.0498689	0.0635722		gene;var:LRMDA|
chr10:75422550-78706814_2	chr10:76013219:rs11000939:T:C	5.46035	0.0487028	0.0635255		gene;var:ADK|
chr10:75422550-78706814_2	chr10:75959024:rs7094239:T:G	5.48783	0.0486407	0.0634702		gene;var:ADK|
chr10:75422550-78706814_2	chr10:75880754:rs6480718:C:G	5.46393	0.287719	0.0633721	3_UTR|peak|	gene;var:AP3M1|	10:75880754:C:G:AP3M1|
chr10:75422550-78706814_2	chr10:76006039:rs4323810:T:C	5.45705	0.0485538	0.0633047		gene;var:ADK|
chr10:75422550-78706814_2	chr10:76006634:rs7099494:T:G	5.45295	0.0483725	0.0630362		gene;var:ADK|
chr10:75422550-78706814_2	chr10:75860098:rs17743339:A:G	5.48001	0.0483491	0.0629635		gene;var:AP3M1|
chr10:75422550-78706814_2	chr10:75965255:rs7896617:A:G	5.47786	0.0482049	0.0628215		gene;var:ADK|
chr10:75422550-78706814_1	chr10:77836459:rs7086995:T:G	6.81892	0.0492895	0.0628096		gene;var:LRMDA|
chr10:75422550-78706814_1	chr10:77836329:rs7068681:A:G	6.81603	0.049108	0.0625705		gene;var:LRMDA|
chr10:75422550-78706814_1	chr10:77835095:rs12252552:T:C	6.80578	0.0484943	0.0617618		gene;var:LRMDA|
chr10:75422550-78706814_1	chr10:77823501:rs2164368:A:G	6.80536	0.0483963	0.0616169		gene;var:LRMDA|
chr10:75422550-78706814_1	chr10:77823872:rs4348834:A:C	6.79199	0.0483135	0.0615046		gene;var:LRMDA|
chr10:75422550-78706814_1	chr10:77800223:rs12765860:T:C	6.74399	0.0478755	0.060627		gene;var:LRMDA|
chr10:75422550-78706814_1	chr10:77815540:rs4431971:T:G	6.77247	0.0468124	0.0595256		gene;var:LRMDA|
chr10:75422550-78706814_1	chr10:77823833:rs2894321:T:C	6.77224	0.0468024	0.0595123		gene;var:LRMDA|
chr10:75422550-78706814_1	chr10:77816170:rs2082853:A:G	6.76775	0.0466097	0.0592562		gene;var:LRMDA|
chr10:75422550-78706814_1	chr10:77840894:rs4746354:T:C	6.77316	0.0463308	0.0589027		gene;var:LRMDA|
chr10:75422550-78706814_1	chr10:77798926:rs4746349:T:C	6.71274	0.0464616	0.0587619		gene;var:LRMDA|
chr10:75422550-78706814_1	chr10:77814981:rs4237285:T:C	6.75978	0.0462204	0.0587433		gene;var:LRMDA|
chr10:75422550-78706814_1	chr10:77810088:rs11001599:T:C	6.68603	0.0820685	0.0580718	peak|	gene;var:LRMDA|
chr10:75422550-78706814_1	chr10:77803747:rs1865636:A:G	6.68331	0.0455617	0.0579261		gene;var:LRMDA|
chr10:75422550-78706814_1	chr10:77834666:rs11001606:A:G	6.74877	0.0454375	0.0577118		gene;var:LRMDA|
chr10:75422550-78706814_1	chr10:77836502:rs7087016:T:C	6.73735	0.0450122	0.0571538		gene;var:LRMDA|
chr10:75422550-78706814_1	chr10:77832333:rs7083638:C:G	6.71677	0.0448664	0.0569272		gene;var:LRMDA|
chr10:75422550-78706814_1	chr10:77803692:rs1865634:C:G	6.66098	0.0447865	0.056895		gene;var:LRMDA|
chr10:75422550-78706814_1	chr10:77803388:rs1865633:A:G	6.65895	0.0447223	0.0568095		gene;var:LRMDA|
chr10:78706814-80876749_1	chr10:79083871:rs10824526:T:C	-14.3161	0.354854	0.388257		gene;var:KCNMA1|
chr10:78706814-80876749_1	chr10:79085683:rs7923107:T:C	-14.1663	0.0981046	0.114434		gene;var:KCNMA1|
chr10:78706814-80876749_1	chr10:79084781:rs7919150:A:G	-14.1662	0.0839669	0.0985086		gene;var:KCNMA1|
chr10:78706814-80876749_1	chr10:79072453:rs10824523:C:G	-14.1856	0.083211	0.0975346		gene;var:KCNMA1|
chr10:78706814-80876749_1	chr10:79079748:rs11002117:A:T	-14.1815	0.0810519	0.0952043		gene;var:KCNMA1|
chr10:78706814-80876749_1	chr10:79099713:rs10824531:A:C	-14.1215	0.0754011	0.0897357		gene;var:KCNMA1|
chr10:78706814-80876749_1	chr10:79080984:rs11002118:T:C	-14.1639	0.0725684	0.0860336		gene;var:KCNMA1|
chr10:78706814-80876749_1	chr10:79077271:rs10824525:T:C	-14.1614	0.127731	0.0848164	peak|	gene;var:KCNMA1|
chr10:78706814-80876749_1	chr10:79090112:rs17486753:A:T	-14.1127	0.0680373	0.0815734		gene;var:KCNMA1|
chr10:78706814-80876749_1	chr10:79099120:rs10509387:T:C	-14.0854	0.0583829	0.0709973		gene;var:KCNMA1|
chr10:78706814-80876749_1	chr10:79087031:rs11002120:T:C	-14.0773	0.100166	0.0683185	peak|	gene;var:KCNMA1|
chr10:78706814-80876749_1	chr10:79086958:rs10509386:T:C	-14.0731	0.0980583	0.067015	peak|	gene;var:KCNMA1|
chr10:78706814-80876749_1	chr10:79088922:rs11002123:T:C	-14.0418	0.04717	0.0586405		gene;var:KCNMA1|
chr10:85458703-87937577_1	chr10:86067700:rs4933320:A:T	-6.88399	1	1		gene;var:CCSER2|
chr10:85458703-87937577_3	chr10:85991083:rs7909901:A:G	-12.1944	0.999928	0.999999		gene;var:LRIT2|
chr10:85458703-87937577_7	chr10:86006013:rs6585849:A:G	-11.0716	0.999994	0.999011	peak|	gene;var:RGR|	10:86006013:A:G:RGR|
chr10:85458703-87937577_6	chr10:86155786:rs35501257:A:G	-8.25892	0.847582	0.850364		gene;var:CCSER2|
chr10:85458703-87937577_5	chr10:86086860:rs12255083:A:G	-5.56272	0.777004	0.658033	peak|	gene;var:CCSER2|
chr10:85458703-87937577_5	chr10:86101032:rs12777928:T:C	-5.56364	0.418221	0.563495		gene;var:CCSER2|
chr10:85458703-87937577_6	chr10:86200645:rs71487110:A:G	-8.25144	0.355435	0.353184		gene;var:CCSER2|
chr10:85458703-87937577_6	chr10:86164340:rs17103434:T:C	-8.25121	0.344738	0.342335		gene;var:CCSER2|
chr10:85458703-87937577_5	chr10:86087334:rs7906260:T:C	-5.56914	0.244244	0.193279	peak|	gene;var:CCSER2|
chr10:85458703-87937577_5	chr10:86084284:rs4933322:T:C	-5.57147	0.0847309	0.118541		gene;var:CCSER2|
chr10:85458703-87937577_5	chr10:86090369:rs10082518:T:C	-5.57292	0.0621795	0.0869587		gene;var:CCSER2|
chr10:89127064-91013381_1	chr10:90042154:rs3781196:T:G	9.33199	0.133657	0.244999		gene;var:RNLS|
chr10:89127064-91013381_1	chr10:90036367:rs999951:C:G	9.31698	0.123581	0.224308		gene;var:RNLS|
chr10:89127064-91013381_1	chr10:90034039:rs7922058:A:G	9.30667	0.662131	0.212049	3_UTR|DAR|peak|	gene;var:RNLS|
chr10:89127064-91013381_1	chr10:90042774:rs3781197:T:G	9.23875	0.0754561	0.124848		gene;var:RNLS|
chr10:89127064-91013381_1	chr10:90036912:rs7094781:A:G	9.19136	0.0701976	0.11443		gene;var:RNLS|
chr10:89127064-91013381_1	chr10:90022399:rs9665166:A:G	9.16144	0.0627931	0.0983674		gene;var:RNLS|
chr10:89127064-91013381_1	chr10:90051317:rs60888743:A:G	9.07002	0.114489	0.0942079	peak|	gene;var:RNLS|
chr10:89127064-91013381_1	chr10:90051035:rs7068821:T:G	9.06029	0.0619751	0.0888835		gene;var:RNLS|
chr10:89127064-91013381_1	chr10:90024599:rs166976:A:G	9.03005	0.061379	0.0862952		gene;var:RNLS|
chr10:89127064-91013381_1	chr10:90031903:rs17110523:A:G	9.03757	0.0859293	0.0687259	peak|	gene;var:RNLS|
chr10:93335047-95396368_2	chr10:94950273:rs12778014:A:G	8.11012	0.999294	0.994666	DAR|peak|	gene;var:CYP26A1|
chr10:93335047-95396368_1	chr10:94946123:rs7919934:T:C	-7.93208	0.121592	0.128975		gene;var:CYP26A1|
chr10:93335047-95396368_1	chr10:94943890:rs10882172:A:G	-7.89831	0.116129	0.120901		gene;var:CYP26A1|
chr10:93335047-95396368_1	chr10:94946268:rs7903804:T:G	-7.91009	0.114435	0.120513		gene;var:CYP26A1|
chr10:93335047-95396368_1	chr10:94945557:rs57346439:A:G	-7.88942	0.111124	0.116956		gene;var:CYP26A1|
chr10:93335047-95396368_1	chr10:94945620:rs4918883:A:G	-7.88929	0.111097	0.116925		gene;var:CYP26A1|
chr10:93335047-95396368_1	chr10:94943788:rs10882171:T:C	-7.88099	0.10933	0.114926		gene;var:CYP26A1|
chr10:93335047-95396368_1	chr10:94947318:rs12360392:T:G	-7.88049	0.109226	0.114809		gene;var:CYP26A1|
chr10:93335047-95396368_1	chr10:94962714:rs7894625:T:G	-7.87283	0.107928	0.112359		gene;var:CYP26A1|
chr10:93335047-95396368_1	chr10:94949808:rs7920484:A:C	-7.88569	0.107588	0.112228		gene;var:CYP26A1|
chr10:93335047-95396368_1	chr10:94956241:rs72815186:T:G	-7.88493	0.107438	0.112062		gene;var:CYP26A1|
chr10:93335047-95396368_1	chr10:94963391:rs72815193:A:G	-7.88304	0.107063	0.111648		gene;var:CYP26A1|
chr10:93335047-95396368_1	chr10:94954808:rs72815184:T:C	-7.87859	0.106196	0.110691		gene;var:CYP26A1|
chr10:93335047-95396368_1	chr10:94944863:rs11187315:A:C	-7.85829	0.104892	0.109953		gene;var:CYP26A1|
chr10:93335047-95396368_1	chr10:94953258:rs17382981:T:C	-7.87476	0.105468	0.10989		gene;var:CYP26A1|
chr10:93335047-95396368_1	chr10:94950713:rs17108260:A:G	-7.85527	0.10199	0.106089		gene;var:CYP26A1|
chr10:93335047-95396368_1	chr10:94942676:rs55744367:T:G	-7.83389	0.101063	0.105313		gene;var:CYP26A1|
chr10:93335047-95396368_1	chr10:94943013:rs4918865:C:G	-7.82623	0.0995067	0.104018		gene;var:CYP26A1|
chr10:93335047-95396368_1	chr10:94941927:rs7916761:T:C	-7.66409	0.0902536	0.0933235		gene;var:CYP26A1|
chr10:93335047-95396368_1	chr10:94940825:rs11187314:C:G	-7.64186	0.0900723	0.093106		gene;var:CYP26A1|
chr10:93335047-95396368_1	chr10:94940767:rs11187313:T:C	-7.62726	0.0886142	0.0916322		gene;var:CYP26A1|
chr10:93335047-95396368_1	chr10:94941813:rs7916838:A:G	-7.65179	0.08667	0.089974		gene;var:CYP26A1|
chr10:93335047-95396368_1	chr10:94938228:rs6583867:T:C	-7.53872	0.0810829	0.0843599		gene;var:CYP26A1|
chr10:93335047-95396368_1	chr10:94926189:rs56871408:A:G	-7.48343	0.0802407	0.0833382		gene;var:CYP26A1|
chr10:93335047-95396368_1	chr10:94936806:rs7078476:T:G	-7.51149	0.079849	0.0832374		gene;var:CYP26A1|
chr10:93335047-95396368_1	chr10:94937675:rs12357177:C:G	-7.50474	0.079581	0.0830011		gene;var:CYP26A1|
chr10:93335047-95396368_1	chr10:94939602:rs10882169:A:G	-7.49519	0.0792256	0.0826931		gene;var:CYP26A1|
chr10:93335047-95396368_1	chr10:94931398:rs4918757:A:G	-7.47848	0.0786681	0.0822253		gene;var:CYP26A1|
chr10:93335047-95396368_1	chr10:94929116:rs10882167:T:C	-7.45428	0.0779988	0.0816988		gene;var:CYP26A1|
chr10:93335047-95396368_1	chr10:94936644:rs7078310:A:T	-7.3195	0.0767173	0.0814114		gene;var:CYP26A1|
chr10:93335047-95396368_1	chr10:94936623:rs7078201:T:G	-7.41405	0.0772122	0.0811783		gene;var:CYP26A1|
chr10:93335047-95396368_1	chr10:94928179:rs117531235:A:G	-7.38323	0.0768572	0.0810467		gene;var:CYP26A1|
chr10:93335047-95396368_1	chr10:94927739:rs11187304:A:C	-7.38858	0.0769046	0.0808553		gene;var:CYP26A1|
chr10:93335047-95396368_1	chr10:94924324:rs10882165:A:T	-7.39882	0.0766509	0.0799271		gene;var:CYP26A1|
chr10:93335047-95396368_1	chr10:94944718:rs10882173:T:G	-7.66002	0.0739225	0.0766521		gene;var:CYP26A1|
chr10:93335047-95396368_1	chr10:94912649:rs10882157:A:G	-7.12955	0.0738582	0.0764571		gene;var:CYP26A1|
chr10:93335047-95396368_1	chr10:94917413:rs12358810:A:G	-7.12274	0.0737333	0.0763807		gene;var:CYP26A1|
chr10:93335047-95396368_1	chr10:94916264:rs10882162:A:G	-7.11927	0.0738808	0.0762762		gene;var:CYP26A1|
chr1:106087842-108409665_2	chr1:107617707:rs1730859:A:G	5.55041	0.237964	0.2451		gene;var:PRMT6|
chr1:106087842-108409665_2	chr1:107616641:rs9435341:T:C	5.61629	0.224143	0.23083		gene;var:PRMT6|
chr1:106087842-108409665_2	chr1:107624563:rs1335055:A:G	5.60077	0.211071	0.217932		gene;var:PRMT6|
chr1:106087842-108409665_2	chr1:107614003:rs1730862:A:G	5.52644	0.206282	0.213706		gene;var:PRMT6|
chr1:106087842-108409665_2	chr1:107613923:rs1762484:A:C	5.52579	0.20597	0.213396		gene;var:PRMT6|
chr1:106087842-108409665_2	chr1:107627697:rs1762486:A:G	5.56584	0.191352	0.198937		gene;var:PRMT6|
chr1:106087842-108409665_2	chr1:107622823:rs1335053:T:C	5.49577	0.188546	0.196096		gene;var:PRMT6|
chr1:106087842-108409665_2	chr1:107625056:rs1762485:T:C	5.5185	0.18528	0.192868		gene;var:PRMT6|
chr1:106087842-108409665_2	chr1:107619244:rs1730858:T:C	5.54515	0.158676	0.16657		gene;var:PRMT6|
chr1:106087842-108409665_1	chr1:108085902:rs663431:T:C	-7.81287	0.151755	0.163532		gene;var:VAV3|
chr1:106087842-108409665_1	chr1:108087825:rs501057:A:G	-7.80759	0.257618	0.161285	peak|	gene;var:VAV3|
chr1:106087842-108409665_2	chr1:107596443:rs1730851:A:G	5.4576	0.153038	0.160944		gene;var:PRMT6|
chr1:106087842-108409665_1	chr1:108085859:rs560683:T:C	-7.78885	0.144679	0.155828		gene;var:VAV3|
chr1:106087842-108409665_1	chr1:108086692:rs1752681:A:G	-7.78608	0.140289	0.151042		gene;var:VAV3|
chr1:106087842-108409665_1	chr1:108085984:rs12032660:T:C	-7.779	0.138715	0.149328		gene;var:VAV3|
chr1:106087842-108409665_1	chr1:108087386:rs504806:A:G	-7.76927	0.1367	0.147132		gene;var:VAV3|
chr1:106087842-108409665_1	chr1:108085209:rs566923:A:G	-7.7472	0.135294	0.145606		gene;var:VAV3|
chr1:106087842-108409665_1	chr1:108087250:rs505822:A:G	-7.76182	0.135265	0.145569		gene;var:VAV3|
chr1:106087842-108409665_1	chr1:108091849:rs643908:A:C	-7.7775	0.13521	0.1455		gene;var:VAV3|
chr1:106087842-108409665_1	chr1:108081910:rs494696:C:G	-7.75936	0.134811	0.145074		gene;var:VAV3|
chr1:106087842-108409665_1	chr1:108087358:rs504881:A:G	-7.75776	0.134522	0.144759		gene;var:VAV3|
chr1:106087842-108409665_1	chr1:108086243:rs6702592:A:G	-7.75046	0.133248	0.143371		gene;var:VAV3|
chr1:106087842-108409665_1	chr1:108086041:rs12035053:C:G	-7.74837	0.132898	0.142989		gene;var:VAV3|
chr1:106087842-108409665_1	chr1:108091354:rs494152:T:C	-7.74772	0.13279	0.142871		gene;var:VAV3|
chr1:106087842-108409665_1	chr1:108089900:rs549903:A:G	-7.74155	0.1318	0.141792		gene;var:VAV3|
chr1:106087842-108409665_1	chr1:108088010:rs499227:T:C	-7.74138	0.228056	0.141763	peak|	gene;var:VAV3|
chr1:106087842-108409665_1	chr1:108088171:rs476157:A:G	-7.74083	0.227914	0.141669	peak|	gene;var:VAV3|
chr1:106087842-108409665_1	chr1:108086666:rs666956:T:C	-7.73525	0.130841	0.140747		gene;var:VAV3|
chr1:106087842-108409665_1	chr1:108086097:rs11185132:T:C	-7.73439	0.130715	0.140609		gene;var:VAV3|
chr1:106087842-108409665_1	chr1:108086146:rs6665028:A:G	-7.73317	0.130537	0.140415		gene;var:VAV3|
chr1:106087842-108409665_1	chr1:108088866:rs580075:A:G	-7.72923	0.129975	0.139802		gene;var:VAV3|
chr1:106087842-108409665_1	chr1:108080945:rs680867:A:T	-7.72817	0.129828	0.139641		gene;var:VAV3|
chr1:106087842-108409665_1	chr1:108082212:rs580995:A:G	-7.72736	0.129715	0.139518		gene;var:VAV3|
chr1:106087842-108409665_1	chr1:108088547:rs472527:C:G	-7.72644	0.129588	0.13938		gene;var:VAV3|
chr1:106087842-108409665_1	chr1:108088334:rs475072:A:C	-7.72427	0.129295	0.13906		gene;var:VAV3|
chr1:106087842-108409665_1	chr1:108088144:rs586180:A:C	-7.71894	0.222816	0.1383	peak|	gene;var:VAV3|
chr1:106087842-108409665_1	chr1:108081883:rs494757:A:G	-7.7154	0.128154	0.137816		gene;var:VAV3|
chr1:106087842-108409665_1	chr1:108080793:rs525842:T:C	-7.71467	0.128063	0.137716		gene;var:VAV3|
chr1:106087842-108409665_1	chr1:108080714:rs526733:A:G	-7.71446	0.128037	0.137688		gene;var:VAV3|
chr1:106087842-108409665_1	chr1:108084777:rs515202:A:G	-7.71393	0.127973	0.137618		gene;var:VAV3|
chr1:106087842-108409665_1	chr1:108081346:rs499513:A:G	-7.71063	0.127577	0.137186		gene;var:VAV3|
chr1:106087842-108409665_1	chr1:108079638:rs557778:A:G	-7.69599	0.127461	0.137069		gene;var:VAV3|
chr1:106087842-108409665_1	chr1:108080046:rs666461:T:G	-7.70911	0.127398	0.136991		gene;var:VAV3|
chr1:106087842-108409665_1	chr1:108080040:rs666460:T:G	-7.70901	0.127387	0.136978		gene;var:VAV3|
chr1:106087842-108409665_1	chr1:108081785:rs684624:A:G	-7.70881	0.127363	0.136953		gene;var:VAV3|
chr1:106087842-108409665_1	chr1:108079857:rs555337:T:G	-7.67665	0.125343	0.134757		gene;var:VAV3|
chr11:104873284-106520894_1	chr11:105692052:rs1002191:C:G	-10.8576	0.595791	0.26787	CRE|peak|	gene;var:GRIA4|cre:GRIA4|
chr11:104873284-106520894_1	chr11:105600358:rs10895869:A:C	-10.7609	0.0521623	0.119671		gene;var:GRIA4|
chr11:104873284-106520894_1	chr11:105567758:rs12790131:A:G	-10.7753	0.0489932	0.108734		gene;var:GRIA4|
chr11:104873284-106520894_1	chr11:105599318:rs2096714:A:G	-10.747	0.0479176	0.10725		gene;var:GRIA4|
chr11:104873284-106520894_1	chr11:105673104:rs630880:T:C	-10.7415	0.0477863	0.106412		gene;var:GRIA4|
chr11:104873284-106520894_1	chr11:105617054:rs10791771:A:G	-10.7338	0.0439545	0.0955892		gene;var:GRIA4|
chr11:104873284-106520894_1	chr11:105699048:rs11226856:A:G	-10.7296	0.232508	0.0881644	CRE|peak|	gene;var:GRIA4|cre:GRIA4|
chr11:104873284-106520894_1	chr11:105699600:rs11226857:T:C	-10.7273	0.0418635	0.086866		gene;var:GRIA4|
chr11:104873284-106520894_1	chr11:105638530:rs2155045:A:C	-10.7165	0.0405636	0.0836042		gene;var:GRIA4|
chr11:104873284-106520894_1	chr11:105580112:rs685374:T:C	-10.7272	0.0400678	0.0836009		gene;var:GRIA4|
chr11:104873284-106520894_1	chr11:105641981:rs1938958:T:C	-10.7103	0.218317	0.0816734	CRE|peak|	gene;var:GRIA4|cre:GRIA4|
chr11:104873284-106520894_1	chr11:105596885:rs1954761:T:C	-10.7048	0.0386659	0.080533		gene;var:GRIA4|
chr11:104873284-106520894_1	chr11:105632364:rs2000523:C:G	-10.6976	0.0383716	0.0793397		gene;var:GRIA4|
chr11:104873284-106520894_1	chr11:105699677:rs11226858:T:C	-10.7057	0.0380238	0.07638		gene;var:GRIA4|
chr11:104873284-106520894_1	chr11:105575774:rs495498:T:C	-10.6946	0.0351063	0.0697825		gene;var:GRIA4|
chr11:104873284-106520894_1	chr11:105661240:rs7934866:A:G	-10.6625	0.033812	0.0664503		gene;var:GRIA4|
chr11:116383348-117747110_1	chr11:117671489:rs3819132:A:G	10.0306	0.965694	0.959896	CRE|peak|	gene;var:DSCAML1|cre:DSCAML1|
chr11:116383348-117747110_2	chr11:117653350:rs7940750:T:C	-8.19428	0.699735	0.915281		gene;var:DSCAML1|
chr11:116383348-117747110_2	chr11:117655063:rs7124184:T:C	-7.85644	0.0971001	0.16375	peak|	gene;var:DSCAML1|
chr11:116383348-117747110_2	chr11:117675286:rs12364667:T:G	-8.58935	0.0623914	0.155359		gene;var:DSCAML1|
chr11:116383348-117747110_2	chr11:117672225:rs2298649:A:G	-8.55217	0.10505	0.151706	peak|	gene;var:DSCAML1|
chr11:116383348-117747110_2	chr11:117674355:rs10892175:A:G	-8.54028	0.0535686	0.14731		gene;var:DSCAML1|
chr11:117747110-119215476_7	chr11:118713180:rs2187490:T:G	5.87257	0.45473	0.592534		gene;var:CXCR5|
chr11:117747110-119215476_7	chr11:118550841:rs79699220:C:G	6.30228	0.626429	0.555381	Promoter|	gene;var:TREH|
chr11:117747110-119215476_7	chr11:118312870:rs74422681:A:G	5.82846	0.644024	0.329346	DAR|peak|	gene;var:KMT2A|
chr11:117747110-119215476_7	chr11:118314849:rs2017122:T:C	5.72391	0.24298	0.248565	peak|	gene;var:KMT2A|
chr11:117747110-119215476_7	chr11:118322488:rs73615909:T:C	5.66585	0.138437	0.243679		gene;var:KMT2A|
chr11:117747110-119215476_7	chr11:118346599:rs9332781:A:G	5.63135	0.136197	0.240317		gene;var:KMT2A|
chr11:117747110-119215476_6	chr11:118349247:rs7941217:T:C	5.59174	0.13563	0.238902		gene;var:KMT2A|
chr11:117747110-119215476_7	chr11:118326445:rs112900272:T:C	5.63634	0.13412	0.236795		gene;var:KMT2A|
chr11:117747110-119215476_7	chr11:118316006:rs76651078:A:G	5.6302	0.134038	0.236669		gene;var:KMT2A|
chr11:117747110-119215476_7	chr11:118354458:rs9332793:A:G	5.61665	0.133704	0.235913		gene;var:KMT2A|
chr11:117747110-119215476_7	chr11:118354505:rs9332794:T:G	5.61656	0.133699	0.235904		gene;var:KMT2A|
chr11:117747110-119215476_7	chr11:118389440:rs9332857:T:C	5.62464	0.133225	0.235512		gene;var:TTC36|
chr11:117747110-119215476_7	chr11:118341649:rs7948661:T:C	5.57106	0.132282	0.233573		gene;var:KMT2A|
chr11:117747110-119215476_7	chr11:118355642:rs9332801:A:C	5.58234	0.626326	0.232376	Exon|	gene;var:KMT2A|
chr11:117747110-119215476_7	chr11:118354750:rs9332796:A:T	5.56279	0.130623	0.230526		gene;var:KMT2A|
chr11:117747110-119215476_7	chr11:118361472:rs9332809:A:G	5.59478	0.130221	0.229607		gene;var:KMT2A|
chr11:117747110-119215476_7	chr11:118335147:rs113566564:A:G	5.55078	0.1294	0.228466		gene;var:KMT2A|
chr11:117747110-119215476_7	chr11:118333537:rs113028342:A:G	5.54261	0.129026	0.227789		gene;var:KMT2A|
chr11:117747110-119215476_7	chr11:118365168:rs2276045:A:G	5.55927	0.12861	0.226703		gene;var:KMT2A|
chr11:117747110-119215476_7	chr11:118367669:rs7103001:A:T	5.54779	0.12814	0.225844		gene;var:KMT2A|
chr11:117747110-119215476_7	chr11:118328052:rs111901186:A:G	5.51534	0.127673	0.225121		gene;var:KMT2A|
chr11:117747110-119215476_7	chr11:118377523:rs9332846:A:G	5.53445	0.127626	0.224893		gene;var:TTC36|
chr11:117747110-119215476_7	chr11:118373861:rs2071702:T:C	5.5298	0.613161	0.224574	Exon|	gene;var:KMT2A|
chr11:117747110-119215476_7	chr11:118379096:rs7113959:A:T	5.4955	0.12719	0.224572		gene;var:TTC36|
chr11:117747110-119215476_7	chr11:118368665:rs7107305:A:G	5.52654	0.612792	0.224354	Exon|	gene;var:KMT2A|
chr11:117747110-119215476_7	chr11:118368822:rs7123835:T:G	5.52308	0.127214	0.224124		gene;var:KMT2A|
chr11:117747110-119215476_7	chr11:118358152:rs148643334:T:C	5.48953	0.12715	0.224082		gene;var:KMT2A|
chr11:117747110-119215476_7	chr11:118371025:rs7116876:C:G	5.51768	0.127026	0.223771		gene;var:KMT2A|
chr11:117747110-119215476_7	chr11:118333510:rs112636863:T:C	5.49307	0.126841	0.223594		gene;var:KMT2A|
chr11:117747110-119215476_7	chr11:118382327:rs7113994:A:G	5.4981	0.126617	0.223449		gene;var:TTC36|
chr11:117747110-119215476_7	chr11:118365263:rs9332819:T:C	5.50992	0.126593	0.222815		gene;var:KMT2A|
chr11:117747110-119215476_7	chr11:118364404:rs9332816:T:G	5.47299	0.12637	0.222502		gene;var:KMT2A|
chr11:117747110-119215476_7	chr11:118381069:rs9332852:T:C	5.49054	0.12576	0.221565		gene;var:TTC36|
chr11:117747110-119215476_7	chr11:118393856:rs9332871:T:G	5.4557	0.606519	0.220928	3_UTR|peak|	gene;var:TTC36|
chr11:119215476-120766806_3	chr11:119314980:rs117141137:A:G	6.5476	0.999992	0.999997		gene;var:THY1|
chr11:119215476-120766806_2	chr11:119217633:rs45509899:T:C	6.99361	0.922317	0.967863	Promoter|peak|	gene;var:MFRP|
chr11:119215476-120766806_1	chr11:119240071:rs677008:A:G	7.45736	0.902611	0.851041	CRE|peak|	gene;var:USP2|cre:USP2|cre:ABCG4|
chr11:119215476-120766806_1	chr11:119239689:rs680268:T:C	7.12577	0.543131	0.36355	CRE|DAR|peak|	gene;var:USP2|cre:HINFP|cre:NLRX1|cre:USP2|cre:ABCG4|cre:CBL|
chr11:122591910-123500117_1	chr11:123421402:rs1029278:A:G	-8.20186	0.929695	0.727623	CRE|DAR|peak|	gene;var:GRAMD1B|cre:GRAMD1B|
chr11:122591910-123500117_1	chr11:123418749:rs2856250:A:G	-8.08752	0.398335	0.642285	peak|	gene;var:GRAMD1B|
chr11:122591910-123500117_1	chr11:123417621:rs2673331:T:C	-8.05425	0.375161	0.60555	peak|	gene;var:GRAMD1B|
chr11:128188537-130342575_3	chr11:128328913:rs8705:A:G	-6.18334	0.996958	0.979659	3_UTR|	gene;var:ETS1|
chr11:128188537-130342575_2	chr11:128691920:rs654169:A:G	-6.04319	0.515294	0.520057		gene;var:KCNJ1|
chr11:128188537-130342575_2	chr11:128691976:rs571856:T:C	-6.0368	0.497492	0.502379		gene;var:KCNJ1|
chr11:131074612-133000046_2	chr11:132962859:rs1346977:A:G	-6.96174	0.328902	0.343715		gene;var:OPCML|
chr11:131074612-133000046_3	chr11:131920067:rs58795:A:G	-6.59464	0.300611	0.332665	peak|	gene;var:NTM|
chr11:131074612-133000046_3	chr11:131920875:rs504027:A:T	-6.5817	0.687142	0.320085	DAR|peak|	gene;var:NTM|
chr11:131074612-133000046_3	chr11:131920593:rs533902:A:C	-6.53954	0.149952	0.283318		gene;var:NTM|
chr11:131074612-133000046_1	chr11:131928971:rs1790165:A:C	7.64979	0.310582	0.257136	peak|	gene;var:NTM|
chr11:131074612-133000046_2	chr11:132964596:rs10791280:C:G	-6.94232	0.207138	0.222121		gene;var:OPCML|
chr11:131074612-133000046_1	chr11:131936494:rs7937152:T:C	7.53689	0.156436	0.21799		gene;var:NTM|
chr11:131074612-133000046_2	chr11:132968796:rs12294492:T:C	-6.87537	0.199696	0.215521		gene;var:OPCML|
chr11:131074612-133000046_3	chr11:131891216:rs10894485:A:T	-5.82796	0.12833	0.211985		gene;var:NTM|
chr11:131074612-133000046_2	chr11:132969839:rs4290236:A:G	-6.89897	0.195261	0.211675		gene;var:OPCML|
chr11:131074612-133000046_2	chr11:132963191:rs1346978:A:T	-6.92512	0.188583	0.205586		gene;var:OPCML|
chr11:131074612-133000046_1	chr11:131933482:rs1015054:C:G	7.60168	0.247643	0.203959	peak|	gene;var:NTM|
chr11:131074612-133000046_1	chr11:131931531:rs1793639:A:G	7.55032	0.248102	0.203513	peak|	gene;var:NTM|
chr11:131074612-133000046_1	chr11:131933511:rs1015053:A:T	7.61897	0.235985	0.193819	peak|	gene;var:NTM|
chr11:131074612-133000046_1	chr11:131931753:rs1793638:A:G	7.57742	0.221769	0.180793	peak|	gene;var:NTM|
chr11:131074612-133000046_3	chr11:131874317:rs2846129:C:G	-5.64729	0.120711	0.160255		gene;var:NTM|
chr11:131074612-133000046_1	chr11:131935863:rs1790172:T:G	7.52977	0.111073	0.15606		gene;var:NTM|
chr11:131074612-133000046_2	chr11:132969436:rs4936183:C:G	-6.84393	0.126808	0.143405		gene;var:OPCML|
chr11:131074612-133000046_3	chr11:131901805:rs948039:A:G	-5.65616	0.0785004	0.106994		gene;var:NTM|
chr11:131074612-133000046_3	chr11:131885234:rs2846326:T:C	-6.00233	0.0731511	0.100767		gene;var:NTM|
chr1:113273306-114873845_2	chr1:114668503:rs17032409:T:G	-6.4287	0.125814	0.250307		gene;var:SYT6|
chr1:113273306-114873845_2	chr1:114669174:rs11581857:T:C	-6.43338	0.492641	0.189326	CRE|DAR|peak|	gene;var:SYT6|cre:SYT6|
chr1:113273306-114873845_2	chr1:114669859:rs3897268:T:G	-6.4267	0.0917366	0.183473		gene;var:SYT6|
chr1:113273306-114873845_2	chr1:114668299:rs7546417:A:C	-6.38962	0.0875598	0.17441		gene;var:SYT6|
chr1:113273306-114873845_2	chr1:114668196:rs7556594:A:G	-6.40711	0.146393	0.164973	peak|	gene;var:SYT6|
chr1:113273306-114873845_2	chr1:114667933:rs7546240:T:C	-6.39381	0.143864	0.15993	peak|	gene;var:SYT6|
chr1:113273306-114873845_2	chr1:114669775:rs4307568:T:C	-6.37844	0.075602	0.148185		gene;var:SYT6|
chr1:113273306-114873845_2	chr1:114669237:rs11581861:T:C	-6.37447	0.34075	0.123871	CRE|DAR|peak|	gene;var:SYT6|cre:SYT6|
chr11:17578402-19569535_1	chr11:18758431:rs7950091:A:T	7.97563	0.93755	0.745725	CRE|peak|	gene;var:IGSF22|cre:PTPN5|
chr11:17578402-19569535_1	chr11:18751041:rs1550870:T:C	7.89432	0.946948	0.694685	Exon|peak|	gene;var:IGSF22|
chr11:17578402-19569535_1	chr11:18750886:rs1550871:A:G	7.81505	0.478684	0.633251	peak|	gene;var:IGSF22|
chr11:28481593-30141357_1	chr11:30027074:rs524373:A:G	12.8414	0.126474	0.198361		gene;var:KCNA4|
chr11:28481593-30141357_1	chr11:30029948:rs511217:A:T	12.8018	0.0869232	0.130724		gene;var:KCNA4|
chr11:28481593-30141357_2	chr11:28695181:rs4271375:A:T	-6.4498	0.173338	0.120381	peak|	gene;var:METTL15|
chr11:28481593-30141357_1	chr11:30053914:rs612114:A:G	12.8026	0.080437	0.11286		gene;var:KCNA4|
chr11:28481593-30141357_1	chr11:30011104:rs521565:A:G	12.8061	0.339808	0.10806	DAR|peak|	gene;var:KCNA4|	11:30011104:A:G:KCNA4|
chr11:28481593-30141357_1	chr11:30054023:rs482476:T:C	12.7977	0.0772282	0.107929		gene;var:KCNA4|
chr11:28481593-30141357_2	chr11:28599880:rs11030381:A:T	-7.02928	0.0910456	0.0931479		gene;var:METTL15|
chr11:28481593-30141357_1	chr11:30054610:rs7944541:T:G	12.837	0.0633533	0.0878031		gene;var:KCNA4|
chr11:28481593-30141357_2	chr11:28679914:rs73437096:T:C	-6.40047	0.0652931	0.0800297		gene;var:METTL15|
chr11:28481593-30141357_2	chr11:28674592:rs4391802:A:G	-6.3753	0.0620507	0.0761319		gene;var:METTL15|
chr11:28481593-30141357_2	chr11:28591587:rs7127383:T:C	-6.99851	0.069854	0.0761178		gene;var:METTL15|
chr11:28481593-30141357_2	chr11:28591168:rs11030380:A:T	-6.98351	0.0670233	0.0734667		gene;var:METTL15|
chr11:28481593-30141357_2	chr11:28623873:rs7931440:T:G	-7.05992	0.0702985	0.0723623		gene;var:METTL15|
chr11:28481593-30141357_1	chr11:30002602:rs522774:A:C	12.7281	0.0501985	0.0709332		gene;var:KCNA4|
chr11:28481593-30141357_2	chr11:28666727:rs11529859:T:C	-6.33061	0.056928	0.069924		gene;var:METTL15|
chr11:28481593-30141357_1	chr11:30054361:rs7943861:A:G	12.7701	0.0513083	0.068355		gene;var:KCNA4|
chr11:28481593-30141357_1	chr11:30054177:rs576833:T:C	12.6888	0.0468721	0.0614449		gene;var:KCNA4|
chr11:28481593-30141357_1	chr11:30023175:rs569724:T:C	12.7064	0.239628	0.0594263	CRE|peak|	gene;var:KCNA4|cre:KCNA4|	11:30023175:T:C:KCNA4|11:30023175:T:C:KCNA4|
chr11:28481593-30141357_2	chr11:28612392:rs4520584:A:G	-6.99466	0.0521769	0.0568501		gene;var:METTL15|
chr11:28481593-30141357_2	chr11:28615384:rs2585814:A:G	-6.98923	0.0514986	0.0562272		gene;var:METTL15|
chr11:28481593-30141357_2	chr11:28615700:rs2582897:T:C	-6.98771	0.0513122	0.0560557		gene;var:METTL15|
chr11:28481593-30141357_2	chr11:28617622:rs4244537:A:C	-6.98587	0.0510866	0.0558479		gene;var:METTL15|
chr11:28481593-30141357_1	chr11:30014764:rs516484:A:C	12.695	0.040675	0.0550964		gene;var:KCNA4|
chr11:28481593-30141357_2	chr11:28618411:rs2585811:A:G	-6.97375	0.0496496	0.054519		gene;var:METTL15|
chr11:28481593-30141357_1	chr11:30001500:rs2476610:A:G	12.6897	0.0717608	0.0541972	peak|	gene;var:KCNA4|	11:30001500:A:G:KCNA4|
chr11:28481593-30141357_2	chr11:28618043:rs10835361:C:G	-6.95591	0.0476633	0.0526662		gene;var:METTL15|
chr11:28481593-30141357_2	chr11:28608730:rs4378371:C:G	-6.9532	0.0473744	0.0523951		gene;var:METTL15|
chr11:28481593-30141357_2	chr11:28615699:rs2582896:A:G	-6.95308	0.0473619	0.0523833		gene;var:METTL15|
chr11:28481593-30141357_2	chr11:28607245:rs7952220:T:C	-6.94831	0.0468613	0.0519126		gene;var:METTL15|
chr11:28481593-30141357_1	chr11:30050401:rs496683:A:G	12.7359	0.0396184	0.0514143		gene;var:KCNA4|
chr11:28481593-30141357_1	chr11:30049013:rs566012:C:G	12.7355	0.0395278	0.0512773		gene;var:KCNA4|
chr11:28481593-30141357_2	chr11:28616251:rs10742196:T:C	-6.9409	0.0461046	0.0511984		gene;var:METTL15|
chr11:28481593-30141357_1	chr11:30008463:rs489640:A:C	12.6422	0.0681649	0.0504823	peak|	gene;var:KCNA4|	11:30008463:A:C:KCNA4|
chr11:28481593-30141357_2	chr11:28607774:rs4923546:A:G	-6.9521	0.0453031	0.0503815		gene;var:METTL15|
chr11:28481593-30141357_1	chr11:30047720:rs593864:T:C	12.7295	0.038337	0.0494784		gene;var:KCNA4|
chr11:28481593-30141357_2	chr11:28614490:rs2585813:A:T	-6.93338	0.0437616	0.0491645		gene;var:METTL15|
chr11:28481593-30141357_2	chr11:28618756:rs10767727:A:G	-6.91749	0.043859	0.0490607		gene;var:METTL15|
chr11:28481593-30141357_1	chr11:30045529:rs545118:A:T	12.7241	0.0373121	0.0479333		gene;var:KCNA4|
chr11:28481593-30141357_2	chr11:28602173:rs2582895:A:C	-6.93914	0.0417441	0.0468179		gene;var:METTL15|
chr11:28481593-30141357_2	chr11:28606699:rs10835360:T:C	-6.86071	0.0392277	0.0445544		gene;var:METTL15|
chr11:28481593-30141357_2	chr11:28691134:rs10767740:A:G	-7.034	0.0370897	0.0434694		gene;var:METTL15|
chr11:28481593-30141357_2	chr11:28602221:rs2585817:A:G	-6.89352	0.0382805	0.0434439		gene;var:METTL15|
chr11:28481593-30141357_2	chr11:28604477:rs11030382:T:C	-6.89196	0.038173	0.0433378		gene;var:METTL15|
chr11:28481593-30141357_2	chr11:28603669:rs7128734:A:G	-6.89106	0.0381111	0.0432767		gene;var:METTL15|
chr11:28481593-30141357_2	chr11:28690352:rs4579914:C:G	-7.02446	0.036568	0.0428888		gene;var:METTL15|
chr11:28481593-30141357_2	chr11:28691287:rs7119404:T:C	-7.1957	0.0362225	0.0414876		gene;var:METTL15|
chr11:28481593-30141357_2	chr11:28653488:rs6484377:T:G	-7.23518	0.0348001	0.0392831		gene;var:METTL15|
chr11:28481593-30141357_2	chr11:28642381:rs10767734:T:C	-6.72641	0.0326414	0.0386082		gene;var:METTL15|
chr11:28481593-30141357_2	chr11:28653630:rs7124523:T:C	-7.22719	0.0328467	0.0373361		gene;var:METTL15|
chr11:28481593-30141357_2	chr11:28654026:rs4290216:T:C	-7.21999	0.032508	0.0369954		gene;var:METTL15|
chr11:28481593-30141357_2	chr11:28680143:rs2356013:T:C	-7.02387	0.0316799	0.0369343		gene;var:METTL15|
chr11:28481593-30141357_2	chr11:28653727:rs7124653:T:G	-7.21794	0.0324131	0.0368997		gene;var:METTL15|
chr11:28481593-30141357_2	chr11:28686052:rs2356009:T:C	-6.87466	0.055624	0.0363485	peak|	gene;var:METTL15|
chr11:28481593-30141357_2	chr11:28687766:rs4923556:T:C	-6.86754	0.0306668	0.0360597		gene;var:METTL15|
chr11:28481593-30141357_2	chr11:28679856:rs11030403:A:G	-7.19692	0.0314814	0.0359553		gene;var:METTL15|
chr11:28481593-30141357_2	chr11:28655672:rs4244538:T:G	-7.19608	0.0314457	0.035919		gene;var:METTL15|
chr11:28481593-30141357_2	chr11:28655058:rs7938026:A:C	-7.1952	0.0314085	0.035881		gene;var:METTL15|
chr11:28481593-30141357_2	chr11:28654868:rs7935241:A:G	-7.1551	0.0313588	0.0358805		gene;var:METTL15|
chr11:28481593-30141357_2	chr11:28654541:rs10835384:A:G	-7.19394	0.0313552	0.0358267		gene;var:METTL15|
chr11:28481593-30141357_2	chr11:28680723:rs7947218:A:C	-6.96099	0.0304407	0.0356003		gene;var:METTL15|
chr11:28481593-30141357_2	chr11:28660818:rs7937781:A:G	-7.18808	0.0311111	0.0355775		gene;var:METTL15|
chr11:28481593-30141357_2	chr11:28688407:rs7129601:A:G	-7.04793	0.0305528	0.0353429		gene;var:METTL15|
chr11:28481593-30141357_2	chr11:28666059:rs11030397:C:G	-7.18182	0.0308563	0.0353165		gene;var:METTL15|
chr11:28481593-30141357_2	chr11:28654287:rs12282355:A:G	-7.17985	0.0307771	0.0352354		gene;var:METTL15|
chr11:28481593-30141357_2	chr11:28656009:rs7928893:T:G	-7.17868	0.0307305	0.0351875		gene;var:METTL15|
chr11:28481593-30141357_2	chr11:28667816:rs4534569:A:G	-7.1779	0.0306997	0.0351558		gene;var:METTL15|
chr11:28481593-30141357_2	chr11:28648185:rs7931459:T:C	-6.97082	0.0299809	0.0351001		gene;var:METTL15|
chr11:28481593-30141357_2	chr11:28644626:rs11030391:A:G	-7.0538	0.0303583	0.0350177		gene;var:METTL15|
chr11:28481593-30141357_2	chr11:28659602:rs3935074:A:T	-7.11801	0.0302035	0.0346935		gene;var:METTL15|
chr11:28481593-30141357_2	chr11:28666064:rs11030398:A:G	-7.16396	0.0301607	0.0346005		gene;var:METTL15|
chr11:28481593-30141357_2	chr11:28658030:rs12577364:A:G	-7.16366	0.0301495	0.034589		gene;var:METTL15|
chr11:28481593-30141357_2	chr11:28657250:rs4344470:A:G	-7.16302	0.0301253	0.034564		gene;var:METTL15|
chr11:28481593-30141357_2	chr11:28648378:rs7931884:C:G	-6.95268	0.0293813	0.0344252		gene;var:METTL15|
chr11:28481593-30141357_2	chr11:28660205:rs4337023:T:C	-7.1591	0.0299791	0.0344128		gene;var:METTL15|
chr11:28481593-30141357_2	chr11:28655898:rs6484378:C:G	-7.15851	0.0299573	0.0343902		gene;var:METTL15|
chr11:28481593-30141357_2	chr11:28667671:rs2883826:A:G	-7.15774	0.0299289	0.0343607		gene;var:METTL15|
chr11:28481593-30141357_2	chr11:28667940:rs4372430:T:C	-7.15669	0.0298904	0.0343208		gene;var:METTL15|
chr11:28481593-30141357_2	chr11:28670122:rs6484387:A:T	-7.15458	0.0298133	0.0342409		gene;var:METTL15|
chr11:28481593-30141357_2	chr11:28693531:rs4923557:T:G	-7.0191	0.0295153	0.0342315		gene;var:METTL15|
chr11:28481593-30141357_2	chr11:28670117:rs6484386:T:G	-7.15406	0.0297944	0.0342212		gene;var:METTL15|
chr11:28481593-30141357_2	chr11:28670769:rs2356016:A:G	-7.1488	0.0296052	0.0340247		gene;var:METTL15|
chr11:28481593-30141357_2	chr11:28651894:rs7951682:C:G	-7.11514	0.0293862	0.0340208		gene;var:METTL15|
chr11:28481593-30141357_2	chr11:28676170:rs11030402:A:G	-7.1475	0.0295592	0.0339768		gene;var:METTL15|
chr11:28481593-30141357_2	chr11:28658957:rs6484379:A:G	-7.14464	0.0294583	0.0338717		gene;var:METTL15|
chr11:28481593-30141357_2	chr11:28666340:rs11030399:A:C	-7.14332	0.0294121	0.0338237		gene;var:METTL15|
chr11:28481593-30141357_2	chr11:28648330:rs7931585:A:T	-6.9348	0.0288242	0.0337948		gene;var:METTL15|
chr11:28481593-30141357_2	chr11:28668416:rs6484385:T:C	-7.16117	0.0293214	0.0337358		gene;var:METTL15|
chr11:28481593-30141357_2	chr11:28676737:rs4923552:A:G	-7.13886	0.0292574	0.0336622		gene;var:METTL15|
chr11:28481593-30141357_2	chr11:28684221:rs7934432:A:G	-6.80016	0.0285366	0.0336051		gene;var:METTL15|
chr11:28481593-30141357_2	chr11:28656234:rs7942417:A:C	-6.93314	0.0285742	0.0334626		gene;var:METTL15|
chr11:28481593-30141357_2	chr11:28676861:rs4923555:A:G	-6.89214	0.0285282	0.0334392		gene;var:METTL15|
chr11:28481593-30141357_2	chr11:28625357:rs11030384:A:T	-6.96742	0.0284711	0.0334318		gene;var:METTL15|
chr11:28481593-30141357_2	chr11:28669964:rs7942414:T:C	-7.13131	0.0290016	0.0333947		gene;var:METTL15|
chr11:28481593-30141357_2	chr11:28677264:rs7942482:T:C	-7.13023	0.0289658	0.0333571		gene;var:METTL15|
chr11:28481593-30141357_2	chr11:28671134:rs2356015:T:C	-7.129	0.0289249	0.0333142		gene;var:METTL15|
chr11:28481593-30141357_2	chr11:28671200:rs2356014:C:G	-7.12886	0.0289204	0.0333095		gene;var:METTL15|
chr11:28481593-30141357_2	chr11:28672350:rs10835388:C:G	-7.12873	0.0289159	0.0333048		gene;var:METTL15|
chr11:28481593-30141357_2	chr11:28676139:rs11030401:A:G	-7.12418	0.0287667	0.0331481		gene;var:METTL15|
chr11:28481593-30141357_2	chr11:28678870:rs10767739:A:G	-6.92061	0.028214	0.0330534		gene;var:METTL15|
chr11:28481593-30141357_2	chr11:28656064:rs7942078:A:T	-6.91898	0.0281682	0.0330013		gene;var:METTL15|
chr11:28481593-30141357_2	chr11:28625664:rs4442537:T:C	-6.95034	0.0281392	0.0329847		gene;var:METTL15|
chr11:28481593-30141357_2	chr11:28650406:rs4350350:T:C	-7.13946	0.0284936	0.0328869		gene;var:METTL15|
chr11:28481593-30141357_2	chr11:28668284:rs7481939:A:G	-6.91273	0.0279949	0.0328038		gene;var:METTL15|
chr11:28481593-30141357_2	chr11:28642653:rs4636654:A:G	-6.9045	0.027952	0.0327783		gene;var:METTL15|
chr11:28481593-30141357_2	chr11:28671629:rs10835387:C:G	-6.90592	0.0278098	0.0325925		gene;var:METTL15|
chr11:28481593-30141357_2	chr11:28676762:rs4923553:C:G	-6.89292	0.0274679	0.0322012		gene;var:METTL15|
chr11:28481593-30141357_2	chr11:28676505:rs10835389:T:C	-6.89193	0.0274426	0.0321722		gene;var:METTL15|
chr11:28481593-30141357_2	chr11:28694440:rs10835391:C:G	-7.03837	0.0276425	0.0321321		gene;var:METTL15|
chr11:28481593-30141357_2	chr11:28670469:rs7105480:A:G	-6.88929	0.0273752	0.0320949		gene;var:METTL15|
chr11:28481593-30141357_2	chr11:28676838:rs4923554:A:G	-6.87676	0.0270626	0.0317355		gene;var:METTL15|
chr11:28481593-30141357_2	chr11:28639130:rs12221661:T:C	-6.86372	0.026977	0.0316906		gene;var:METTL15|
chr11:28481593-30141357_2	chr11:28650182:rs4575255:A:G	-7.09743	0.0272618	0.0315749		gene;var:METTL15|
chr11:28481593-30141357_2	chr11:28629115:rs11030385:A:G	-6.86205	0.0268836	0.0315709		gene;var:METTL15|
chr11:28481593-30141357_2	chr11:28627653:rs10835364:A:G	-6.90066	0.0268467	0.0315116		gene;var:METTL15|
chr11:28481593-30141357_2	chr11:28631248:rs11030386:A:C	-6.90025	0.0268368	0.0315003		gene;var:METTL15|
chr11:28481593-30141357_2	chr11:28644292:rs73434729:A:C	-7.05695	0.0271483	0.0314888		gene;var:METTL15|
chr11:28481593-30141357_2	chr11:28649870:rs7121736:A:G	-7.0941	0.027172	0.0314783		gene;var:METTL15|
chr11:28481593-30141357_2	chr11:28648737:rs11030393:A:G	-7.09357	0.0271578	0.0314631		gene;var:METTL15|
chr11:28481593-30141357_2	chr11:28647955:rs4290215:T:G	-7.09199	0.0271157	0.0314177		gene;var:METTL15|
chr11:28481593-30141357_2	chr11:28644885:rs10835382:T:C	-7.08991	0.0270606	0.0313585		gene;var:METTL15|
chr11:28481593-30141357_2	chr11:28643942:rs10835373:T:C	-7.05181	0.0270129	0.0313422		gene;var:METTL15|
chr11:28481593-30141357_2	chr11:28642320:rs10767733:A:G	-6.81435	0.026698	0.0313419		gene;var:METTL15|
chr11:28481593-30141357_2	chr11:28660862:rs7938122:T:G	-7.06562	0.0270495	0.0313231		gene;var:METTL15|
chr11:28481593-30141357_2	chr11:28666538:rs7933262:T:C	-6.86131	0.0266945	0.0313108		gene;var:METTL15|
chr11:28481593-30141357_2	chr11:28644027:rs10835375:A:G	-7.04625	0.026869	0.0311861		gene;var:METTL15|
chr11:28481593-30141357_2	chr11:28644038:rs10767736:T:G	-7.04625	0.026869	0.0311861		gene;var:METTL15|
chr11:28481593-30141357_2	chr11:28630051:rs10835365:A:G	-6.88377	0.0264529	0.0310583		gene;var:METTL15|
chr11:28481593-30141357_2	chr11:28645819:rs10767737:T:G	-7.07833	0.0267613	0.0310353		gene;var:METTL15|
chr11:28481593-30141357_2	chr11:28650096:rs4471400:T:C	-7.07805	0.0267541	0.0310275		gene;var:METTL15|
chr11:28481593-30141357_2	chr11:28646611:rs4351802:A:T	-7.07748	0.0267397	0.0310119		gene;var:METTL15|
chr11:28481593-30141357_2	chr11:28645698:rs4274191:A:G	-7.07644	0.0267136	0.0309837		gene;var:METTL15|
chr11:28481593-30141357_2	chr11:28648671:rs11030392:A:G	-7.0757	0.0266949	0.0309634		gene;var:METTL15|
chr11:28481593-30141357_2	chr11:28644830:rs10835381:A:G	-7.03638	0.0266764	0.0309591		gene;var:METTL15|
chr11:28481593-30141357_2	chr11:28651358:rs10835383:A:C	-7.0744	0.0266624	0.0309281		gene;var:METTL15|
chr11:28481593-30141357_2	chr11:28650536:rs4568992:A:G	-7.07412	0.0266554	0.0309207		gene;var:METTL15|
chr11:28481593-30141357_2	chr11:28650910:rs6484376:A:G	-7.07403	0.0266531	0.0309182		gene;var:METTL15|
chr11:28481593-30141357_2	chr11:28643971:rs10835374:A:G	-7.03241	0.0265229	0.0308095		gene;var:METTL15|
chr11:28481593-30141357_2	chr11:28645584:rs4267058:T:C	-7.06976	0.0265476	0.0308037		gene;var:METTL15|
chr11:28481593-30141357_2	chr11:28647156:rs4434991:A:T	-7.06763	0.0264955	0.0307471		gene;var:METTL15|
chr11:28481593-30141357_2	chr11:28646472:rs4576808:T:C	-7.05876	0.0262828	0.0305156		gene;var:METTL15|
chr11:28481593-30141357_2	chr11:28667089:rs7130649:T:C	-7.034	0.0262628	0.0304722		gene;var:METTL15|
chr11:28481593-30141357_2	chr11:28645341:rs4268495:C:G	-7.05452	0.0261836	0.0304074		gene;var:METTL15|
chr11:28481593-30141357_2	chr11:28644602:rs12576604:A:G	-6.90623	0.0260515	0.0303532		gene;var:METTL15|
chr11:28481593-30141357_2	chr11:28644112:rs11030388:T:G	-7.0143	0.0260956	0.0303416		gene;var:METTL15|
chr11:28481593-30141357_2	chr11:28643299:rs10835368:T:C	-6.98254	0.0254667	0.029686		gene;var:METTL15|
chr11:28481593-30141357_2	chr11:28643877:rs10835371:A:G	-6.97772	0.0253129	0.0294761		gene;var:METTL15|
chr11:30141357-32276901_1	chr11:30251041:rs34224414:T:G	8.44009	1	1		gene;var:FSHB|
chr11:30141357-32276901_4	chr11:30285085:rs11031017:A:T	6.03939	1	1		gene;var:FSHB|
chr11:30141357-32276901_2	chr11:31815896:rs2239789:A:T	-5.86118	0.825684	0.570235	CRE|peak|	gene;var:PAX6|cre:PAX6|cre:PAUPAR|
chr11:30141357-32276901_2	chr11:31813509:rs3026390:T:C	-5.78445	0.0921491	0.37853		gene;var:PAX6|
chr11:30141357-32276901_2	chr11:31809322:rs12421026:T:C	-5.46927	0.0873894	0.0526996	3_UTR|	gene;var:PAX6|
chr11:39382003-42310003_3	chr11:40215678:rs11035730:C:G	-6.58967	0.575949	0.713396		gene;var:LRRC4C|
chr11:39382003-42310003_1	chr11:40149300:rs11606250:A:G	-21.5027	0.714343	0.703969	peak|	gene;var:LRRC4C|
chr11:39382003-42310003_1	chr11:40149305:rs11602008:A:T	-21.487	0.368665	0.356171	peak|	gene;var:LRRC4C|
chr11:39382003-42310003_3	chr11:40218057:rs10837363:A:G	-6.42799	0.487028	0.344393	peak|	gene;var:LRRC4C|
chr11:39382003-42310003_2	chr11:40710758:rs11036020:A:C	-6.17954	0.195079	0.210626		gene;var:LRRC4C|
chr11:39382003-42310003_2	chr11:40710263:rs11036019:A:G	-6.19678	0.176925	0.192136		gene;var:LRRC4C|
chr11:39382003-42310003_2	chr11:40716823:rs11036026:A:C	-6.15149	0.175419	0.190701		gene;var:LRRC4C|
chr11:39382003-42310003_2	chr11:40717352:rs7926792:A:G	-6.11779	0.153771	0.169536		gene;var:LRRC4C|
chr11:39382003-42310003_2	chr11:40709693:rs11036018:A:G	-6.23967	0.143841	0.158298		gene;var:LRRC4C|
chr11:39382003-42310003_2	chr11:40709637:rs11036017:T:C	-6.22801	0.138334	0.152744		gene;var:LRRC4C|
chr11:39382003-42310003_2	chr11:40717193:rs7926567:C:G	-6.08348	0.119247	0.134257		gene;var:LRRC4C|
chr11:39382003-42310003_2	chr11:40717439:rs7926912:A:G	-5.99684	0.10538	0.120185		gene;var:LRRC4C|
chr11:39382003-42310003_2	chr11:40708653:rs34339418:A:T	-6.08874	0.0842388	0.0983279		gene;var:LRRC4C|
chr11:39382003-42310003_2	chr11:40715609:rs7947151:A:T	-6.13167	0.138174	0.0921924	peak|	gene;var:LRRC4C|
chr11:42310003-44693799_1	chr11:43290063:rs2172998:A:C	7.76783	0.450869	0.251861	Promoter|CRE|peak|	gene;var:HNRNPKP3|cre:TTC17|
chr11:42310003-44693799_1	chr11:43287716:rs7103863:T:G	7.7754	0.20087	0.238868		gene;var:HNRNPKP3|
chr11:42310003-44693799_1	chr11:43300039:rs10838091:T:G	7.76129	0.164865	0.194515		gene;var:HNRNPKP3|
chr11:42310003-44693799_1	chr11:43293940:rs7124481:A:G	7.75917	0.159586	0.188118		gene;var:HNRNPKP3|
chr11:42310003-44693799_1	chr11:43296794:rs11037404:T:C	7.74219	0.152353	0.179378		gene;var:HNRNPKP3|
chr11:42310003-44693799_1	chr11:43295407:rs12800533:A:G	7.72381	0.145178	0.170699		gene;var:HNRNPKP3|
chr11:42310003-44693799_1	chr11:43298130:rs12807758:T:C	7.7154	0.142105	0.166978		gene;var:HNRNPKP3|
chr11:42310003-44693799_1	chr11:43298263:rs11037407:T:C	7.71032	0.140309	0.164803		gene;var:HNRNPKP3|
chr11:44693799-47006137_2	chr11:45687366:rs55681357:T:C	-5.62953	0.999999	0.999997	Promoter|CRE|peak|	gene;var:CHST1|cre:CHST1|cre:CRY2|
chr11:47006137-49866050_2	chr11:47396654:rs4752829:A:G	-6.66576	0.0615592	0.116929		gene;var:SPI1|
chr11:47006137-49866050_1	chr11:47392114:rs7928419:A:G	7.31678	0.0485863	0.0864839		gene;var:SPI1|
chr11:47006137-49866050_2	chr11:47449544:rs7105122:T:C	-6.45672	0.0772999	0.0785746	peak|	gene;var:PSMC3|	11:47449544:T:C:PSMC3|
chr11:47006137-49866050_2	chr11:47450318:rs7105907:A:T	-6.46044	0.0427832	0.0781943		gene;var:PSMC3|
chr11:47006137-49866050_2	chr11:47447955:rs7948705:C:G	-6.45363	0.0962216	0.0771	Promoter|CRE|peak|	gene;var:PSMC3|cre:ARFGAP2|cre:MADD|	11:47447955:C:G:PSMC3|
chr11:47006137-49866050_2	chr11:47451517:rs9734013:T:G	-6.44448	0.0415845	0.0756792		gene;var:PSMC3|
chr11:47006137-49866050_2	chr11:47456202:rs4282946:A:G	-6.44073	0.22822	0.0751787	CRE|DAR|peak|	gene;var:PSMC3|cre:PACSIN3|	11:47456202:A:G:PSMC3|
chr11:47006137-49866050_2	chr11:47451623:rs9919526:T:C	-6.43984	0.0412508	0.0749816		gene;var:PSMC3|
chr11:47006137-49866050_2	chr11:47454701:rs10742805:A:G	-6.4372	0.0411279	0.074654		gene;var:PSMC3|
chr11:47006137-49866050_2	chr11:47449378:rs7101772:A:G	-6.43228	0.0407207	0.0738758		gene;var:PSMC3|
chr11:47006137-49866050_2	chr11:47456226:rs10742806:A:T	-6.42624	0.222885	0.0730787	CRE|DAR|peak|	gene;var:PSMC3|cre:PACSIN3|	11:47456226:A:T:PSMC3|
chr11:47006137-49866050_2	chr11:47454271:rs4237544:A:C	-6.42473	0.0402687	0.0728685		gene;var:PSMC3|
chr11:47006137-49866050_2	chr11:47453722:rs7108143:T:G	-6.39571	0.0397194	0.0717243		gene;var:PSMC3|
chr11:47006137-49866050_2	chr11:47468545:rs12419342:T:C	-6.28422	0.0403125	0.0715065		gene;var:RAPSN|
chr11:47006137-49866050_2	chr11:47465955:rs4752837:A:G	-6.38806	0.0392956	0.0708494		gene;var:RAPSN|
chr11:47006137-49866050_2	chr11:47452321:rs7130693:T:C	-6.40898	0.0392442	0.0707499		gene;var:PSMC3|
chr11:47006137-49866050_2	chr11:47465095:rs4752836:T:C	-6.38643	0.039193	0.0706376		gene;var:RAPSN|
chr11:47006137-49866050_2	chr11:47460306:rs7126210:A:G	-6.39802	0.229876	0.067005	Exon|	gene;var:RAPSN|
chr11:47006137-49866050_2	chr11:47453518:rs7107853:T:C	-6.37264	0.0371239	0.0664061		gene;var:PSMC3|
chr11:47006137-49866050_2	chr11:47460098:rs10769267:T:C	-6.37002	0.226894	0.0661201	3_UTR|	gene;var:RAPSN|
chr11:47006137-49866050_2	chr11:47462115:rs7104366:A:G	-6.36625	0.0367836	0.0657145		gene;var:RAPSN|
chr11:47006137-49866050_2	chr11:47457789:rs7117277:A:G	-6.36491	0.0367133	0.0655718		gene;var:PSMC3|
chr11:47006137-49866050_1	chr11:47432303:rs755553:A:G	7.18883	0.0673871	0.064089	peak|	gene;var:SLC39A13|
chr11:47006137-49866050_1	chr11:47419301:rs896815:T:G	7.19581	0.0369765	0.0637636		gene;var:SLC39A13|
chr11:47006137-49866050_2	chr11:47453828:rs80241400:T:C	-6.33911	0.0354358	0.0629928		gene;var:PSMC3|
chr11:47006137-49866050_2	chr11:47452744:rs11820680:T:C	-6.3364	0.0353096	0.0627396		gene;var:PSMC3|
chr11:47006137-49866050_1	chr11:47448497:rs11600581:T:C	7.2041	0.0825642	0.0621666	Promoter|	gene;var:PSMC3|
chr11:47006137-49866050_2	chr11:47468820:rs3740684:T:C	-6.32569	0.0348254	0.0617702		gene;var:RAPSN|
chr11:47006137-49866050_1	chr11:47442893:rs3781626:A:T	7.20647	0.0658057	0.0616501	peak|	gene;var:PSMC3|
chr11:47006137-49866050_1	chr11:47379407:rs2084946:T:C	7.18754	0.0653619	0.0613725	peak|	gene;var:SLC39A13|
chr11:47006137-49866050_2	chr11:47460005:rs12282783:T:C	-6.3174	0.0344655	0.0610524		gene;var:RAPSN|
chr11:47006137-49866050_1	chr11:47440283:rs2293580:A:T	7.17949	0.0643366	0.0608739	peak|	gene;var:PSMC3|
chr11:47006137-49866050_2	chr11:47469439:rs7111873:A:G	-6.32016	0.211482	0.0607274	Exon|	gene;var:RAPSN|
chr11:47006137-49866050_1	chr11:47376363:rs3740686:A:G	7.18099	0.0815879	0.0606226	Promoter|peak|	gene;var:SLC39A13|
chr11:47006137-49866050_1	chr11:47439938:rs10742803:A:G	7.1665	0.0353086	0.0601634		gene;var:PSMC3|
chr11:47006137-49866050_1	chr11:47380061:rs10734557:A:C	7.17095	0.216172	0.0595968	3_UTR|	gene;var:SLC39A13|
chr11:47006137-49866050_1	chr11:47449101:rs60075622:T:G	7.18463	0.0347832	0.0594529		gene;var:PSMC3|
chr11:47006137-49866050_2	chr11:47461480:rs7119556:T:C	-6.29647	0.0604484	0.0593624	peak|	gene;var:RAPSN|
chr11:47006137-49866050_1	chr11:47379615:rs1542321:A:G	7.16947	0.0625487	0.0590529	peak|	gene;var:SLC39A13|
chr11:47006137-49866050_2	chr11:47468791:rs3740685:T:C	-6.12759	0.0330149	0.0581857		gene;var:RAPSN|
chr11:47006137-49866050_1	chr11:47437202:rs2293577:T:C	7.15096	0.210788	0.0581653	3_UTR|peak|	gene;var:SLC39A13|
chr11:47006137-49866050_1	chr11:47432034:rs755554:C:G	7.12418	0.0598115	0.0561737	peak|	gene;var:SLC39A13|
chr11:47006137-49866050_1	chr11:47384597:rs11039203:A:G	7.12792	0.033064	0.0557096		gene;var:SLC39A13|
chr11:47006137-49866050_1	chr11:47383275:rs7105851:T:C	7.13102	0.032742	0.0555036		gene;var:SLC39A13|
chr11:47006137-49866050_1	chr11:47376448:rs1057233:A:G	7.1379	0.0751827	0.0553761	Promoter|peak|	gene;var:SLC39A13|
chr11:47006137-49866050_2	chr11:47468569:rs3824867:A:G	-6.08987	0.0315443	0.0552186		gene;var:RAPSN|
chr11:47006137-49866050_1	chr11:47375193:rs11039195:A:G	7.11245	0.0747957	0.0547823	Promoter|peak|	gene;var:MYBPC3|
chr11:47006137-49866050_1	chr11:47379212:rs11039199:C:G	7.11077	0.0326662	0.0546112		gene;var:SLC39A13|
chr11:47006137-49866050_1	chr11:47385194:rs67116452:A:G	7.11354	0.0322545	0.0542438		gene;var:SLC39A13|
chr11:47006137-49866050_1	chr11:47386073:rs10838699:T:C	7.11306	0.0317772	0.0537358		gene;var:SLC39A13|
chr11:47006137-49866050_1	chr11:47385923:rs10838698:A:G	7.11149	0.0316977	0.053591		gene;var:SLC39A13|
chr11:47006137-49866050_1	chr11:47428565:rs4752999:T:C	7.10793	0.0716085	0.0530908	Promoter|	gene;var:SLC39A13|
chr11:47006137-49866050_1	chr11:47424400:rs11039219:T:C	7.10572	0.0563973	0.0530636	peak|	gene;var:SLC39A13|
chr11:47006137-49866050_1	chr11:47419129:rs7924485:A:G	7.10343	0.0311634	0.0528039		gene;var:SLC39A13|
chr11:47006137-49866050_1	chr11:47379646:rs11039200:A:C	7.09188	0.0567488	0.0527795	peak|	gene;var:SLC39A13|
chr11:47006137-49866050_1	chr11:47374998:rs2856661:A:G	7.09074	0.0717987	0.0526897	Promoter|peak|	gene;var:MYBPC3|
chr11:47006137-49866050_1	chr11:47426956:rs112060627:A:G	7.10118	0.0310242	0.0525094		gene;var:SLC39A13|
chr11:47006137-49866050_1	chr11:47389223:rs35996350:A:G	7.11902	0.0310998	0.052472		gene;var:SPI1|
chr11:47006137-49866050_1	chr11:47430458:rs7937331:T:C	7.08564	0.0709257	0.0523884	Promoter|	gene;var:SLC39A13|
chr11:47006137-49866050_1	chr11:47389676:rs4752827:C:G	7.11576	0.0308897	0.0521612		gene;var:SPI1|
chr11:47006137-49866050_1	chr11:47395240:rs7940536:A:G	7.11526	0.0308673	0.0521211		gene;var:SPI1|
chr11:47006137-49866050_1	chr11:47391879:rs7928163:A:G	7.10828	0.0305585	0.0515687		gene;var:SPI1|
chr11:47006137-49866050_1	chr11:47394338:rs896816:T:C	7.10781	0.189217	0.0515326	5_UTR|	gene;var:SPI1|
chr11:47006137-49866050_1	chr11:47434777:rs6485756:A:G	7.06719	0.0304011	0.0510595		gene;var:SLC39A13|
chr11:47006137-49866050_1	chr11:47466006:rs4752838:A:G	7.10445	0.0302428	0.0509552		gene;var:RAPSN|
chr11:47006137-49866050_1	chr11:47410951:rs4752993:T:C	7.07514	0.0301714	0.0508287		gene;var:SPI1|
chr11:47006137-49866050_1	chr11:47418306:rs12802273:T:C	7.0815	0.0299626	0.0505774		gene;var:SLC39A13|
chr11:47006137-49866050_1	chr11:47410200:rs6485753:T:C	7.07486	0.0300255	0.0504965		gene;var:SPI1|
chr11:47006137-49866050_1	chr11:47411581:rs10769262:A:G	7.07986	0.0298981	0.0504632		gene;var:SPI1|
chr11:47006137-49866050_1	chr11:47446292:rs55927797:A:T	7.09178	0.0299417	0.0504522		gene;var:PSMC3|
chr11:47006137-49866050_1	chr11:47458765:rs7106956:T:C	7.09167	0.0298801	0.0504098		gene;var:PSMC3|
chr11:47006137-49866050_1	chr11:47454972:rs2868459:C:G	7.08991	0.0536613	0.0502876	peak|	gene;var:PSMC3|
chr11:47006137-49866050_1	chr11:47391039:rs10769258:T:C	7.08888	0.029768	0.0501688		gene;var:SPI1|
chr11:47006137-49866050_1	chr11:47411065:rs4752994:A:T	7.07551	0.0297304	0.0501669		gene;var:SPI1|
chr11:47006137-49866050_1	chr11:47429245:rs7107726:A:T	7.06151	0.0672222	0.0495893	Promoter|peak|	gene;var:SLC39A13|
chr11:47006137-49866050_1	chr11:47450338:rs35496532:T:C	7.07644	0.0293607	0.049426		gene;var:PSMC3|
chr11:47006137-49866050_1	chr11:47443080:rs3781625:T:C	7.07338	0.0526614	0.0492342	peak|	gene;var:PSMC3|
chr11:47006137-49866050_1	chr11:47393638:rs4992357:T:C	7.07192	0.0291514	0.049093		gene;var:SPI1|
chr11:47006137-49866050_1	chr11:47387599:rs935914:T:C	7.08073	0.0290161	0.0487421		gene;var:SLC39A13|
chr11:47006137-49866050_1	chr11:47390692:rs4752987:A:G	7.05992	0.0287535	0.0484073		gene;var:SPI1|
chr11:47006137-49866050_1	chr11:47416636:rs55876153:A:G	7.04178	0.137351	0.0481547	DAR|peak|	gene;var:SLC39A13|
chr11:47006137-49866050_1	chr11:47423553:rs4752832:A:G	7.01036	0.0283307	0.0476329		gene;var:SLC39A13|
chr11:47006137-49866050_1	chr11:47419757:rs1317164:T:G	7.02433	0.028266	0.0476088		gene;var:SLC39A13|
chr11:47006137-49866050_1	chr11:47439444:rs2053979:A:G	7.04046	0.0505046	0.0471495	peak|	gene;var:PSMC3|
chr11:47006137-49866050_1	chr11:47466790:rs7925389:A:T	7.02433	0.0279927	0.0471255		gene;var:RAPSN|
chr11:47006137-49866050_1	chr11:47391745:rs67472071:A:G	7.02888	0.0280828	0.0470646		gene;var:SPI1|
chr11:47006137-49866050_1	chr11:47393303:rs11039212:A:T	7.00308	0.0272529	0.0458453		gene;var:SPI1|
chr11:47006137-49866050_1	chr11:47410393:rs4752990:A:G	6.9837	0.0488405	0.0456608	peak|	gene;var:SPI1|
chr11:47006137-49866050_1	chr11:47413475:rs12803525:A:G	6.98273	0.0488041	0.0456281	peak|	gene;var:SPI1|
chr11:47006137-49866050_1	chr11:47397714:rs55677087:C:G	6.99122	0.0270011	0.0454418		gene;var:SPI1|
chr11:47006137-49866050_1	chr11:47401060:rs11607981:T:G	6.96207	0.0618578	0.0454034	Promoter|	gene;var:SPI1|
chr11:47006137-49866050_1	chr11:47401058:rs11601173:A:G	6.9602	0.0617705	0.0453421	Promoter|	gene;var:SPI1|
chr11:47006137-49866050_1	chr11:47418465:rs58965622:C:G	6.96997	0.0268359	0.0452236		gene;var:SLC39A13|
chr11:47006137-49866050_1	chr11:47459963:rs35705029:A:T	6.9743	0.0266648	0.0448902		gene;var:RAPSN|
chr11:47006137-49866050_1	chr11:47424717:rs10838704:T:C	6.94656	0.0480655	0.044859	peak|	gene;var:SLC39A13|
chr11:47006137-49866050_1	chr11:47457539:rs11604680:A:G	6.95692	0.0476336	0.0443366	peak|	gene;var:PSMC3|
chr1:148361253-151538881_2	chr1:150612361:rs4970969:T:C	-5.54852	0.416131	0.459986		gene;var:ENSA|
chr1:148361253-151538881_2	chr1:150614535:rs12067556:A:G	-5.73022	0.109312	0.125789		gene;var:ENSA|
chr1:148361253-151538881_2	chr1:150600181:rs2280078:T:C	-5.60405	0.0723789	0.0838914		gene;var:ENSA|
chr1:148361253-151538881_2	chr1:150611957:rs10888386:A:G	-5.58944	0.0692187	0.0803044		gene;var:ENSA|
chr1:148361253-151538881_2	chr1:150563483:rs6695123:T:C	-5.5408	0.0644431	0.0749047		gene;var:MCL1|
chr1:148361253-151538881_2	chr1:150586971:rs6681426:A:G	-5.55288	0.0620912	0.0722137		gene;var:ENSA|
chr1:148361253-151538881_2	chr1:150546865:rs6587756:A:T	-5.50079	0.108131	0.0695137	peak|	gene;var:MCL1|
chr1:148361253-151538881_2	chr1:150555588:rs35967040:A:C	-5.48333	0.102904	0.0662342	peak|	gene;var:MCL1|
chr1:148361253-151538881_2	chr1:150554458:rs11204671:T:C	-5.48231	0.102611	0.0660508	peak|	gene;var:MCL1|
chr1:148361253-151538881_2	chr1:150542128:rs6655975:A:G	-5.46132	0.0407503	0.0477202		gene;var:MCL1|
chr1:154770403-156336133_2	chr1:154977929:rs4845402:A:G	-5.83057	0.822619	0.904075		gene;var:ZBTB7B|
chr1:154770403-156336133_4	chr1:155103147:rs6665822:A:C	6.41875	0.48327	0.448732	peak|	gene;var:EFNA1|
chr1:154770403-156336133_2	chr1:154981708:rs4845700:T:C	-5.95003	0.38602	0.299678	peak|	gene;var:ZBTB7B|
chr1:154770403-156336133_4	chr1:155076505:rs11264313:A:G	-6.13082	0.186621	0.267721		gene;var:EFNA1|
chr1:154770403-156336133_4	chr1:155075888:rs11264312:T:C	-6.14331	0.184028	0.264558		gene;var:EFNA1|
chr1:154770403-156336133_4	chr1:155074903:rs6427158:T:G	-6.14077	0.659065	0.264044	DAR|peak|	gene;var:EFNA3|
chr1:154770403-156336133_4	chr1:155070862:rs56112907:A:C	-6.13202	0.182262	0.262286		gene;var:EFNA3|
chr1:154770403-156336133_4	chr1:155076043:rs4625273:T:C	-6.12686	0.181468	0.261263		gene;var:EFNA1|
chr1:154770403-156336133_4	chr1:155072055:rs10796938:A:C	-6.12291	0.180866	0.260487		gene;var:EFNA3|
chr1:154770403-156336133_4	chr1:155068748:rs7365544:A:C	-6.11424	0.179558	0.258802		gene;var:EFNA3|
chr1:154770403-156336133_4	chr1:155076734:rs7366355:T:C	-6.11031	0.177208	0.255567		gene;var:EFNA1|
chr1:154770403-156336133_4	chr1:155083717:rs11264318:A:T	-6.15731	0.177052	0.255328		gene;var:EFNA1|
chr1:154770403-156336133_4	chr1:155087188:rs7364869:A:G	-6.14233	0.176297	0.254394		gene;var:EFNA1|
chr1:154770403-156336133_4	chr1:155082527:rs7546746:A:G	-6.13975	0.174556	0.252113		gene;var:EFNA1|
chr1:154770403-156336133_4	chr1:155078423:rs11264314:C:G	-6.09273	0.172751	0.249777		gene;var:EFNA1|
chr1:154770403-156336133_4	chr1:155065159:rs7534162:A:G	-5.61505	0.17287	0.249436		gene;var:EFNA3|
chr1:154770403-156336133_4	chr1:155083942:rs11264319:T:C	-6.10315	0.172079	0.248663		gene;var:EFNA1|
chr1:154770403-156336133_4	chr1:155082298:rs7548955:T:C	-6.11953	0.171786	0.248544		gene;var:EFNA1|
chr1:154770403-156336133_4	chr1:155094271:rs34815285:T:C	6.03476	0.16247	0.245198		gene;var:EFNA1|
chr1:154770403-156336133_4	chr1:155081940:rs6693477:T:C	-6.09216	0.168208	0.243929		gene;var:EFNA1|
chr1:154770403-156336133_4	chr1:155082158:rs11581730:A:T	-6.09216	0.168208	0.243929		gene;var:EFNA1|
chr1:154770403-156336133_4	chr1:155085270:rs11583762:A:G	-6.05861	0.166331	0.24127		gene;var:EFNA1|
chr1:154770403-156336133_4	chr1:155080090:rs7368345:A:G	-6.0647	0.164811	0.239545		gene;var:EFNA1|
chr1:154770403-156336133_4	chr1:155095124:rs11264328:A:G	5.94622	0.156847	0.23701		gene;var:EFNA1|
chr1:154770403-156336133_4	chr1:155100265:rs11264331:A:G	5.93486	0.327011	0.236361	Promoter|CRE|DAR|peak|	gene;var:EFNA1|cre:EFNA3|cre:TRIM46|
chr1:154770403-156336133_4	chr1:155106054:rs4390169:A:G	5.69372	0.66988	0.230735	Exon|peak|	gene;var:SLC50A1|
chr1:154770403-156336133_4	chr1:155095300:rs12040970:T:C	5.93024	0.148475	0.224732		gene;var:EFNA1|
chr1:154770403-156336133_4	chr1:155095158:rs11264329:A:G	5.91951	0.147565	0.223409		gene;var:EFNA1|
chr1:154770403-156336133_4	chr1:155095601:rs9330263:A:G	5.91297	0.147021	0.222617		gene;var:EFNA1|
chr1:154770403-156336133_4	chr1:155106227:rs4745:A:T	5.6187	0.651018	0.219205	Exon|peak|	gene;var:SLC50A1|
chr1:154770403-156336133_4	chr1:155128717:rs4971077:T:C	5.5184	0.134017	0.208974		gene;var:DPM3|
chr1:154770403-156336133_4	chr1:155127749:rs7535292:T:C	5.5038	0.132379	0.206042		gene;var:DPM3|
chr1:158027412-159913048_2	chr1:158037320:rs7368400:A:G	8.50739	0.211635	0.480301		gene;var:KIRREL1|
chr1:158027412-159913048_1	chr1:158039425:rs17420551:A:T	-11.2555	0.744635	0.470577	CRE|DAR|peak|	gene;var:KIRREL1|cre:KIRREL1|
chr1:158027412-159913048_2	chr1:158036740:rs1886389:T:C	8.5134	0.340709	0.452817	peak|	gene;var:KIRREL1|
chr1:158027412-159913048_1	chr1:158039865:rs7547456:A:G	-11.2442	0.16611	0.44478		gene;var:KIRREL1|
chr1:158027412-159913048_2	chr1:158039623:rs11264894:A:G	8.57394	0.776359	0.429284	CRE|DAR|peak|	gene;var:KIRREL1|cre:KIRREL1|
chr1:158027412-159913048_1	chr1:158038598:rs34536198:A:G	-11.1923	0.609679	0.345305	CRE|peak|	gene;var:KIRREL1|cre:KIRREL1|
chr1:158027412-159913048_2	chr1:158033331:rs9787108:T:C	-10.3699	0.155189	0.310697		gene;var:KIRREL1|
chr1:158027412-159913048_1	chr1:158036373:rs17420502:A:G	-11.1208	0.194517	0.260428	peak|	gene;var:KIRREL1|
chr1:158027412-159913048_1	chr1:158029021:rs7552600:A:C	-11.0558	0.113541	0.25702		gene;var:KIRREL1|
chr1:158027412-159913048_1	chr1:158037073:rs7547120:A:T	-11.1113	0.109927	0.256253		gene;var:KIRREL1|
chr11:58780549-62223771_1	chr11:61505168:rs198444:A:G	-7.67015	0.849866	0.563548	Exon|peak|	gene;var:MYRF|
chr11:58780549-62223771_1	chr11:61505696:rs198443:T:G	-7.63604	0.183483	0.340041	peak|	gene;var:MYRF|
chr11:58780549-62223771_1	chr11:61506468:rs198442:T:C	-7.62386	0.171707	0.312814	peak|	gene;var:MYRF|
chr11:58780549-62223771_2	chr11:61551356:rs174535:T:C	-6.66515	0.559282	0.269334	Exon|	gene;var:MYRF|
chr11:58780549-62223771_2	chr11:61593005:rs174567:A:G	-6.43583	0.0739357	0.185943		gene;var:FADS2|
chr11:58780549-62223771_2	chr11:61551927:rs174536:A:C	-6.57701	0.128657	0.184304	peak|	gene;var:MYRF|
chr11:58780549-62223771_2	chr11:61592362:rs174566:A:G	-6.39429	0.120758	0.169845	peak|	gene;var:FADS2|	11:61592362:A:G:FADS2|
chr11:58780549-62223771_2	chr11:61596633:rs99780:T:C	-6.35268	0.147745	0.164134	Promoter|CRE|peak|	gene;var:FADS2|cre:RAB3IL1|cre:FTH1|cre:FADS3|	11:61596633:T:C:FADS2|
chr11:58780549-62223771_2	chr11:61557803:rs102275:T:C	-6.3618	0.116737	0.163648	peak|	gene;var:MIR611|
chr11:58780549-62223771_2	chr11:61588305:rs174564:A:G	-6.36265	0.0599654	0.147864		gene;var:FADS1|
chr11:58780549-62223771_2	chr11:61585144:rs174562:A:G	-6.38269	0.132778	0.146073	Promoter|peak|	gene;var:FADS1|	11:61585144:A:G:FADS1|
chr11:58780549-62223771_2	chr11:61569306:rs174545:C:G	-6.37547	0.327667	0.138921	3_UTR|peak|	gene;var:FEN1|
chr11:58780549-62223771_2	chr11:61575158:rs174553:A:G	-6.35762	0.0556391	0.136216		gene;var:FADS1|
chr11:58780549-62223771_2	chr11:61569830:rs174546:T:C	-6.35101	0.321365	0.13529	3_UTR|	gene;var:FEN1|
chr11:58780549-62223771_2	chr11:61593816:rs174568:T:C	-6.31282	0.097914	0.134027	peak|	gene;var:FADS2|
chr11:58780549-62223771_2	chr11:61571478:rs174550:T:C	-6.33798	0.0547426	0.133573		gene;var:FADS1|
chr11:58780549-62223771_2	chr11:61597972:rs1535:A:G	-6.29319	0.289001	0.133459	CRE|peak|	gene;var:FADS2|cre:DAGLA|
chr11:58780549-62223771_2	chr11:61579463:rs174554:A:G	-6.33048	0.0544917	0.132946		gene;var:FADS1|
chr11:58780549-62223771_2	chr11:61570783:rs174547:T:C	-6.3329	0.0545303	0.132941		gene;var:FADS1|
chr11:58780549-62223771_2	chr11:61549025:rs174533:A:G	-6.30776	0.0952263	0.129505	peak|	gene;var:MYRF|
chr11:58780549-62223771_2	chr11:61557826:rs102274:T:C	-6.30738	0.0951189	0.129468	peak|	gene;var:MIR611|
chr11:58780549-62223771_2	chr11:61552680:rs174537:T:G	-6.29028	0.0521311	0.125497		gene;var:MIR611|
chr11:58780549-62223771_2	chr11:61600342:rs174574:A:C	-6.0674	0.271938	0.122664	CRE|DAR|peak|	gene;var:FADS2|cre:FADS2|cre:DAGLA|	11:61600342:A:C:FADS2|11:61600342:A:C:FADS2|
chr11:58780549-62223771_2	chr11:61606642:rs174580:A:G	-6.02387	0.050479	0.121211		gene;var:FADS2|
chr11:58780549-62223771_2	chr11:61606683:rs174581:A:G	-6.02282	0.0504617	0.121158		gene;var:FADS2|
chr11:58780549-62223771_2	chr11:61605499:rs174578:A:T	-6.04159	0.0504349	0.121018		gene;var:FADS2|
chr11:58780549-62223771_2	chr11:61609750:rs174583:T:C	-6.04828	0.229206	0.118753	DAR|peak|	gene;var:FADS2|	11:61609750:T:C:FADS2|
chr11:58780549-62223771_2	chr11:61604814:rs174577:A:C	-5.97183	0.266432	0.118498	CRE|peak|	gene;var:FADS2|cre:FADS2|cre:DAGLA|	11:61604814:A:C:FADS2|11:61604814:A:C:FADS2|
chr11:58780549-62223771_2	chr11:61543499:rs174528:T:C	-6.17802	0.0487359	0.117022		gene;var:MYRF|
chr1:162346721-165191702_1	chr1:164213686:rs1556867:T:C	-10.9475	0.655287	0.736928		gene;var:PBX1|
chr1:162346721-165191702_1	chr1:164214985:rs10917958:T:C	-10.7955	0.295207	0.177789	peak|	gene;var:PBX1|
chr1:162346721-165191702_1	chr1:164194299:rs6672382:A:G	-10.5386	0.0615468	0.0635786		gene;var:PBX1|
chr1:162346721-165191702_1	chr1:164194843:rs782852:T:C	-10.5197	0.0588852	0.0607387		gene;var:PBX1|
chr1:162346721-165191702_1	chr1:164187793:rs148840644:A:C	-10.4471	0.0527156	0.0541458		gene;var:PBX1|
chr1:162346721-165191702_1	chr1:164188254:rs140548670:A:G	-10.4616	0.0525784	0.0540152		gene;var:PBX1|
chr1:162346721-165191702_1	chr1:164208213:rs57382675:A:T	-10.423	0.0519042	0.0532914		gene;var:PBX1|
chr1:162346721-165191702_1	chr1:164180204:rs1591645:A:G	-10.3827	0.049356	0.0505705		gene;var:PBX1|
chr1:162346721-165191702_1	chr1:164191393:rs61802992:A:C	-10.4178	0.0492436	0.0504635		gene;var:PBX1|
chr1:162346721-165191702_1	chr1:164194143:rs1337362:C:G	-10.4162	0.049139	0.0503521		gene;var:PBX1|
chr1:170557776-173097907_10	chr1:170798444:rs10753823:A:G	5.7709	0.377456	0.402071		gene;var:MROH9|
chr1:170557776-173097907_10	chr1:170774874:rs1555067:C:G	6.05072	0.257397	0.282177		gene;var:MROH9|
chr1:170557776-173097907_10	chr1:170771306:rs10919475:A:G	6.10578	0.254859	0.281502		gene;var:MROH9|
chr1:170557776-173097907_10	chr1:170762680:rs10919470:A:G	5.67253	0.254554	0.277889		gene;var:PRRX1|
chr1:170557776-173097907_10	chr1:170769979:rs7523880:T:C	6.03588	0.243896	0.270047		gene;var:MROH9|
chr1:170557776-173097907_10	chr1:170773521:rs10737554:T:C	5.98305	0.245778	0.269764		gene;var:MROH9|
chr1:170557776-173097907_10	chr1:170763553:rs10919471:A:G	6.0232	0.243229	0.269433		gene;var:PRRX1|
chr1:170557776-173097907_10	chr1:170772776:rs2206310:A:G	5.97677	0.244779	0.268696		gene;var:MROH9|
chr1:170557776-173097907_10	chr1:170773031:rs2143109:A:G	5.9726	0.244123	0.267993		gene;var:MROH9|
chr1:170557776-173097907_10	chr1:170781171:rs113131691:T:G	5.66526	0.243835	0.265539		gene;var:MROH9|
chr1:170557776-173097907_10	chr1:170771935:rs10919476:T:C	5.95417	0.240674	0.264448		gene;var:MROH9|
chr1:170557776-173097907_10	chr1:170764907:rs10800541:A:G	5.99112	0.238431	0.26414		gene;var:PRRX1|
chr1:170557776-173097907_10	chr1:170767519:rs763770:T:C	6.00001	0.237422	0.263222		gene;var:PRRX1|
chr1:170557776-173097907_10	chr1:170777858:rs6660781:T:C	5.6425	0.240329	0.26189		gene;var:MROH9|
chr1:170557776-173097907_10	chr1:170789861:rs10919482:A:C	5.61391	0.236157	0.257547		gene;var:MROH9|
chr1:170557776-173097907_10	chr1:170763636:rs10753820:A:G	5.95187	0.230926	0.256014		gene;var:PRRX1|
chr1:170557776-173097907_10	chr1:170780433:rs12022507:A:T	5.59691	0.233794	0.255087		gene;var:MROH9|
chr1:170557776-173097907_10	chr1:170764915:rs10800542:T:G	5.92797	0.227955	0.252709		gene;var:PRRX1|
chr1:170557776-173097907_10	chr1:170741090:rs7527200:T:C	5.82858	0.226995	0.251012		gene;var:PRRX1|
chr1:170557776-173097907_10	chr1:170765768:rs10800543:T:C	5.9101	0.745084	0.250352	DAR|peak|	gene;var:PRRX1|
chr1:170557776-173097907_10	chr1:170715110:rs6679313:A:G	5.75671	0.224929	0.248902		gene;var:PRRX1|
chr1:170557776-173097907_10	chr1:170716460:rs7528424:T:C	5.75417	0.224639	0.248581		gene;var:PRRX1|
chr1:170557776-173097907_10	chr1:170756257:rs10919468:T:C	5.82808	0.222957	0.246775		gene;var:PRRX1|
chr1:170557776-173097907_10	chr1:170742228:rs1029320:A:G	5.78413	0.219269	0.242641		gene;var:PRRX1|
chr1:170557776-173097907_10	chr1:170748276:rs10733057:C:G	5.76962	0.217021	0.240185		gene;var:PRRX1|
chr1:170557776-173097907_10	chr1:170777292:rs10919478:T:C	5.70936	0.21571	0.237108		gene;var:MROH9|
chr1:170557776-173097907_10	chr1:170791811:rs6683847:A:G	5.7036	0.215191	0.236557		gene;var:MROH9|
chr1:170557776-173097907_10	chr1:170788655:rs7544590:A:T	5.68423	0.213507	0.234767		gene;var:MROH9|
chr1:170557776-173097907_10	chr1:170780316:rs2103639:T:C	5.68294	0.213398	0.23465		gene;var:MROH9|
chr1:170557776-173097907_10	chr1:170785586:rs12059356:A:G	5.62944	0.211861	0.232972		gene;var:MROH9|
chr1:170557776-173097907_10	chr1:170782683:rs10919480:C:G	5.64086	0.210066	0.231108		gene;var:MROH9|
chr1:170557776-173097907_4	chr1:170790119:rs10919483:A:G	5.63754	0.20982	0.230847		gene;var:MROH9|
chr1:170557776-173097907_10	chr1:170780958:rs112469079:A:C	5.62944	0.209233	0.230223		gene;var:MROH9|
chr1:170557776-173097907_10	chr1:170757471:rs10919469:T:G	5.63955	0.206853	0.228802		gene;var:PRRX1|
chr1:178954470-181144121_10	chr1:179896885:rs505789:A:G	6.32194	0.121975	0.211178		gene;var:CEP350|
chr1:178954470-181144121_10	chr1:179897264:rs530369:C:G	6.07958	0.103574	0.181677		gene;var:CEP350|
chr1:178954470-181144121_10	chr1:179862404:rs1298477:A:C	6.07799	0.102113	0.178432		gene;var:TOR1AIP1|
chr1:178954470-181144121_10	chr1:179894001:rs2762858:T:C	6.08888	0.101914	0.177559		gene;var:CEP350|
chr1:178954470-181144121_10	chr1:179879185:rs600553:T:C	6.09549	0.0989083	0.174198		gene;var:TOR1AIP1|
chr1:178954470-181144121_10	chr1:179879604:rs480377:A:T	6.09288	0.0987134	0.173885		gene;var:TOR1AIP1|
chr1:178954470-181144121_10	chr1:179896410:rs501300:C:G	6.08582	0.0984599	0.173575		gene;var:CEP350|
chr1:178954470-181144121_10	chr1:179871712:rs505837:A:G	6.08917	0.0984396	0.173446		gene;var:TOR1AIP1|
chr1:178954470-181144121_10	chr1:179892125:rs1298479:T:C	6.05756	0.0988408	0.172914		gene;var:CEP350|
chr1:178954470-181144121_10	chr1:179888228:rs549650:C:G	6.08444	0.509078	0.172892	3_UTR|	gene;var:CEP350|
chr1:178954470-181144121_10	chr1:179879039:rs600046:T:C	6.07878	0.0976866	0.172237		gene;var:TOR1AIP1|
chr1:178954470-181144121_10	chr1:179858444:rs2245425:A:G	5.9832	0.0983211	0.171065		gene;var:TOR1AIP1|
chr1:178954470-181144121_10	chr1:179895764:rs474258:A:G	6.0368	0.0975229	0.170819		gene;var:CEP350|
chr1:178954470-181144121_10	chr1:179880917:rs12062341:A:C	6.06531	0.0967397	0.170717		gene;var:TOR1AIP1|
chr1:178954470-181144121_10	chr1:179893810:rs2777909:C:G	6.03742	0.0973731	0.170618		gene;var:CEP350|
chr1:178954470-181144121_10	chr1:179895861:rs475233:T:C	6.03224	0.0971994	0.170313		gene;var:CEP350|
chr1:178954470-181144121_10	chr1:179876988:rs609521:C:G	6.08917	0.499243	0.17012	Exon|	gene;var:TOR1AIP1|
chr1:178954470-181144121_10	chr1:179885433:rs599185:A:G	6.08065	0.0950262	0.169203		gene;var:TOR1AIP1|
chr1:178954470-181144121_10	chr1:179863922:rs514421:T:C	5.95505	0.0963159	0.168001		gene;var:TOR1AIP1|
chr1:178954470-181144121_10	chr1:179863796:rs475434:A:C	5.95113	0.0960482	0.167592		gene;var:TOR1AIP1|
chr1:178954470-181144121_10	chr1:179854797:rs538512:A:G	6.03435	0.0947152	0.167448		gene;var:TOR1AIP1|
chr1:178954470-181144121_10	chr1:179870919:rs547776:A:C	6.05932	0.0936978	0.166999		gene;var:TOR1AIP1|
chr1:178954470-181144121_10	chr1:179885939:rs612215:A:G	6.05652	0.0935291	0.166719		gene;var:TOR1AIP1|
chr1:178954470-181144121_10	chr1:179881004:rs12062383:A:C	6.05433	0.0933984	0.166502		gene;var:TOR1AIP1|
chr1:178954470-181144121_10	chr1:179847635:rs2249346:T:C	6.04664	0.205118	0.166454	Promoter|peak|	gene;var:TOR1AIP2|
chr1:178954470-181144121_10	chr1:179892028:rs644412:A:G	6.01789	0.0929694	0.165025		gene;var:CEP350|
chr1:178954470-181144121_10	chr1:179887788:rs531814:T:C	5.58308	0.475149	0.163792	3_UTR|	gene;var:CEP350|
chr1:178954470-181144121_10	chr1:179850543:rs2007148:C:G	6.01771	0.201691	0.163705	Promoter|peak|	gene;var:TOR1AIP1|
chr1:178954470-181144121_8	chr1:179807938:rs2794582:A:T	5.91946	0.0912093	0.163006		gene;var:TOR1AIP2|
chr1:178954470-181144121_9	chr1:179863237:rs486906:T:G	5.89882	0.0927269	0.162533		gene;var:TOR1AIP1|
chr1:178954470-181144121_10	chr1:179859333:rs553830:A:G	5.93002	0.0918874	0.162316		gene;var:TOR1AIP1|
chr1:178954470-181144121_10	chr1:179852552:rs605807:T:G	6.00648	0.387927	0.162221	DAR|peak|	gene;var:TOR1AIP1|
chr1:178954470-181144121_10	chr1:179806890:rs2647227:A:G	5.89328	0.0902125	0.161208		gene;var:TOR1AIP2|
chr1:178954470-181144121_10	chr1:179824405:rs1281429:A:G	5.97239	0.0897025	0.160395		gene;var:TOR1AIP2|
chr1:178954470-181144121_10	chr1:179891092:rs522534:T:C	5.98597	0.0896953	0.160352		gene;var:CEP350|
chr1:178954470-181144121_10	chr1:179824377:rs1281430:T:C	5.96976	0.0895741	0.160181		gene;var:TOR1AIP2|
chr1:178954470-181144121_10	chr1:179826030:rs1281413:A:G	5.96839	0.0895077	0.160071		gene;var:TOR1AIP2|
chr1:178954470-181144121_10	chr1:179842107:rs479094:T:C	5.89681	0.0904002	0.159987		gene;var:TOR1AIP2|
chr1:178954470-181144121_10	chr1:179858333:rs1300068:T:C	5.90073	0.090304	0.15983		gene;var:TOR1AIP1|
chr1:178954470-181144121_10	chr1:179861079:rs502036:T:C	5.46527	0.0881997	0.159564		gene;var:TOR1AIP1|
chr1:178954470-181144121_10	chr1:179853096:rs480498:C:G	5.8906	0.15789	0.15902	peak|	gene;var:TOR1AIP1|
chr1:178954470-181144121_10	chr1:179893352:rs2777908:T:C	5.8973	0.088898	0.158789		gene;var:CEP350|
chr1:178954470-181144121_10	chr1:179817654:rs1281432:A:G	5.94327	0.0886424	0.158733		gene;var:TOR1AIP2|
chr1:178954470-181144121_10	chr1:179813499:rs1281408:A:G	5.93795	0.470417	0.15833	3_UTR|	gene;var:TOR1AIP2|
chr1:178954470-181144121_10	chr1:179883494:rs555270:A:G	5.89734	0.0873097	0.156838		gene;var:TOR1AIP1|
chr1:178954470-181144121_10	chr1:179813352:rs2794583:T:C	5.91608	0.466516	0.156741	3_UTR|	gene;var:TOR1AIP2|
chr1:178954470-181144121_10	chr1:179820868:rs1148815:T:C	5.91058	0.0873608	0.156565		gene;var:TOR1AIP2|
chr1:178954470-181144121_10	chr1:179887681:rs530854:C:G	5.88378	0.463661	0.155897	3_UTR|	gene;var:CEP350|
chr1:178954470-181144121_10	chr1:179807281:rs2777917:A:G	5.68911	0.0861829	0.15463		gene;var:TOR1AIP2|
chr1:178954470-181144121_10	chr1:179852074:rs1281378:T:C	5.89137	0.189739	0.15416	Promoter|	gene;var:TOR1AIP1|
chr1:178954470-181144121_10	chr1:179857781:rs518774:A:G	5.78059	0.0863288	0.154012		gene;var:TOR1AIP1|
chr1:178954470-181144121_10	chr1:179839548:rs2794585:A:T	5.76225	0.0856127	0.15394		gene;var:TOR1AIP2|
chr1:178954470-181144121_10	chr1:179823825:rs1148812:C:G	5.81928	0.0847042	0.152401		gene;var:TOR1AIP2|
chr1:178954470-181144121_10	chr1:179845022:rs589780:A:G	5.81249	0.0844862	0.15203		gene;var:TOR1AIP2|
chr1:178954470-181144121_10	chr1:179814457:rs1281411:A:C	5.76901	0.449736	0.150247	3_UTR|	gene;var:TOR1AIP2|
chr1:178954470-181144121_10	chr1:179818132:rs1281412:A:G	5.79434	0.0833196	0.149857		gene;var:TOR1AIP2|
chr11:84381272-86619301_1	chr11:84634790:rs2155413:A:C	-11.0006	0.962808	0.922888	Promoter|peak|	gene;var:DLG2|
chr11:84381272-86619301_2	chr11:84610503:rs12284441:T:C	-6.2895	0.340428	0.244339	peak|	gene;var:DLG2|
chr11:84381272-86619301_2	chr11:84610561:rs12290572:A:G	-6.20356	0.24141	0.173793	peak|	gene;var:DLG2|
chr11:84381272-86619301_2	chr11:84610102:rs17147795:T:C	-6.18023	0.116303	0.14861		gene;var:DLG2|
chr11:84381272-86619301_2	chr11:84609813:rs11603955:T:C	-6.16211	0.107766	0.13752		gene;var:DLG2|
chr11:84381272-86619301_2	chr11:84608960:rs17159857:A:G	-6.15584	0.104999	0.133924		gene;var:DLG2|
chr11:84381272-86619301_2	chr11:84608798:rs11601217:T:C	-6.15101	0.102932	0.131237		gene;var:DLG2|
chr11:84381272-86619301_2	chr11:84608642:rs11605352:A:C	-6.14307	0.0996494	0.126969		gene;var:DLG2|
chr11:84381272-86619301_1	chr11:84638165:rs2374576:T:C	10.6622	0.0522667	0.0818322		gene;var:DLG2|
chr1:197311514-199239884_1	chr1:198830746:rs17704988:A:T	-7.27466	0.292221	0.410419		gene;var:MIR181A1|
chr1:197311514-199239884_1	chr1:198833047:rs17705018:T:C	-7.25996	0.288393	0.404635		gene;var:MIR181A1|
chr1:197311514-199239884_1	chr1:198825249:rs17755872:T:C	-7.25355	0.286751	0.402177		gene;var:MIR181B1|
chr1:197311514-199239884_1	chr1:198839807:rs17705190:A:G	-7.18822	0.280519	0.402112		gene;var:MIR181A1|
chr1:197311514-199239884_1	chr1:198845149:rs17756214:A:G	-7.17362	0.879428	0.39671	CRE|peak|	gene;var:MIR181A1|cre:MIR181A1HG|
chr1:197311514-199239884_1	chr1:198835152:rs17705094:A:G	-7.23695	0.282584	0.396003		gene;var:MIR181A1|
chr1:197311514-199239884_1	chr1:198835379:rs74838206:T:C	-7.21239	0.27663	0.387341		gene;var:MIR181A1|
chr1:197311514-199239884_1	chr1:198823324:rs78078089:A:G	-7.10969	0.254293	0.356614		gene;var:MIR181B1|
chr1:197311514-199239884_1	chr1:198823215:rs77733063:A:G	-7.10537	0.253438	0.355497		gene;var:MIR181B1|
chr1:197311514-199239884_1	chr1:198822774:rs112018479:T:C	-7.01286	0.23665	0.334551		gene;var:MIR181B1|
chr1:199239884-200137649_3	chr1:200060706:rs56340031:A:G	-6.91793	0.960044	0.959988		gene;var:NR5A2|
chr1:199239884-200137649_1	chr1:200097648:rs2258280:A:G	7.31385	0.233015	0.239476		gene;var:NR5A2|
chr1:199239884-200137649_1	chr1:200092448:rs2737683:A:G	7.28114	0.204999	0.210639		gene;var:NR5A2|
chr1:199239884-200137649_1	chr1:200093253:rs2821333:A:C	7.00488	0.131268	0.13488		gene;var:NR5A2|
chr1:199239884-200137649_2	chr1:199716262:rs11484858:T:C	-5.59652	0.128698	0.132394		gene;var:NR5A2|
chr1:199239884-200137649_2	chr1:199785169:rs265447:A:G	-5.71148	0.128736	0.132367		gene;var:NR5A2|
chr1:199239884-200137649_1	chr1:200091864:rs2737681:T:C	7.00135	0.123899	0.127326		gene;var:NR5A2|
chr1:199239884-200137649_1	chr1:200091548:rs2258675:C:G	6.99076	0.120505	0.123852		gene;var:NR5A2|
chr1:199239884-200137649_1	chr1:200094347:rs2737686:T:C	6.96751	0.118769	0.122082		gene;var:NR5A2|
chr1:199239884-200137649_1	chr1:200088559:rs2737680:A:C	7.04633	0.104601	0.107618		gene;var:NR5A2|
chr1:199239884-200137649_2	chr1:199768077:rs12411015:A:G	-5.72342	0.103902	0.107012		gene;var:NR5A2|
chr1:199239884-200137649_1	chr1:200085714:rs2821332:A:T	7.04003	0.10321	0.106195		gene;var:NR5A2|
chr1:199239884-200137649_1	chr1:200095935:rs1986405:C:G	6.8265	0.101836	0.104904		gene;var:NR5A2|
chr1:199239884-200137649_2	chr1:199751611:rs2052914:T:C	-5.65505	0.101116	0.104114		gene;var:NR5A2|
chr1:199239884-200137649_1	chr1:200086074:rs2260033:A:G	7.02915	0.100918	0.103851		gene;var:NR5A2|
chr1:199239884-200137649_2	chr1:199769249:rs12401355:A:C	-5.7003	0.0988071	0.101812		gene;var:NR5A2|
chr1:199239884-200137649_1	chr1:200084743:rs2816973:C:G	7.0191	0.0989191	0.101808		gene;var:NR5A2|
chr1:199239884-200137649_2	chr1:199784809:rs265448:A:T	-5.5688	0.0986312	0.101587		gene;var:NR5A2|
chr1:199239884-200137649_2	chr1:199714953:rs2435231:A:G	-5.73264	0.0976435	0.100629		gene;var:NR5A2|
chr1:199239884-200137649_1	chr1:200086839:rs2737676:T:C	6.84729	0.0967347	0.0995663		gene;var:NR5A2|
chr1:199239884-200137649_2	chr1:199759017:rs4915183:A:G	-5.66773	0.0956447	0.0985949		gene;var:NR5A2|
chr1:199239884-200137649_2	chr1:199776405:rs265453:T:C	-5.59005	0.095676	0.098565		gene;var:NR5A2|
chr1:199239884-200137649_2	chr1:199766184:rs79662541:T:C	-5.64508	0.0950503	0.09799		gene;var:NR5A2|
chr1:199239884-200137649_2	chr1:199755538:rs2502123:T:C	-5.68818	0.0929153	0.0957987		gene;var:NR5A2|
chr1:199239884-200137649_2	chr1:199715370:rs1030519:A:G	-5.68449	0.0922988	0.0951696		gene;var:NR5A2|
chr1:199239884-200137649_2	chr1:199777749:rs2553737:C:G	-5.62744	0.0919992	0.0948727		gene;var:NR5A2|
chr1:199239884-200137649_2	chr1:199756999:rs2435222:T:C	-5.6455	0.0917768	0.0946471		gene;var:NR5A2|
chr1:199239884-200137649_2	chr1:199770930:rs79896626:T:C	-5.65997	0.0914686	0.0943246		gene;var:NR5A2|
chr1:199239884-200137649_2	chr1:199708021:rs2502132:A:G	-5.67376	0.0905804	0.0934163		gene;var:NR5A2|
chr1:199239884-200137649_1	chr1:200088041:rs2737678:T:C	6.80967	0.159548	0.09327	peak|	gene;var:NR5A2|
chr1:199239884-200137649_2	chr1:199755408:rs2502124:C:G	-5.67217	0.0903361	0.093167		gene;var:NR5A2|
chr1:199239884-200137649_2	chr1:199782481:rs9427689:C:G	-5.50427	0.0902582	0.0930591		gene;var:NR5A2|
chr1:199239884-200137649_2	chr1:199777330:rs265452:A:T	-5.6155	0.0900995	0.0929334		gene;var:NR5A2|
chr1:199239884-200137649_2	chr1:199748106:rs2435238:T:G	-5.66856	0.0897894	0.0926093		gene;var:NR5A2|
chr1:199239884-200137649_2	chr1:199749441:rs2435237:A:G	-5.6669	0.0895422	0.092357		gene;var:NR5A2|
chr1:199239884-200137649_2	chr1:199731106:rs2502120:A:G	-5.68359	0.157255	0.0920312	peak|	gene;var:NR5A2|
chr1:199239884-200137649_1	chr1:200082464:rs2821330:A:G	6.79879	0.0890067	0.0916792		gene;var:NR5A2|
chr1:199239884-200137649_1	chr1:200083184:rs2363572:A:G	6.79462	0.0884329	0.0910941		gene;var:NR5A2|
chr1:199239884-200137649_1	chr1:200093887:rs2821334:T:G	6.79689	0.0879672	0.0906788		gene;var:NR5A2|
chr1:199239884-200137649_1	chr1:200081710:rs2737673:T:C	6.78953	0.0877511	0.0903989		gene;var:NR5A2|
chr1:199239884-200137649_1	chr1:200078773:rs2816978:A:G	6.79435	0.0866882	0.089297		gene;var:NR5A2|
chr1:199239884-200137649_2	chr1:199722676:rs2435215:A:G	-5.59803	0.0851	0.0878331		gene;var:NR5A2|
chr1:199239884-200137649_2	chr1:199721587:rs2502125:A:G	-5.59596	0.0848519	0.08758		gene;var:NR5A2|
chr1:199239884-200137649_2	chr1:199707512:rs2502134:A:G	-5.62622	0.0842162	0.0869234		gene;var:NR5A2|
chr1:199239884-200137649_2	chr1:199742457:rs2502116:C:G	-5.61754	0.0832467	0.0859345		gene;var:NR5A2|
chr1:199239884-200137649_2	chr1:199742199:rs2435226:A:G	-5.61727	0.0832177	0.0859049		gene;var:NR5A2|
chr1:199239884-200137649_2	chr1:199746995:rs2502114:T:C	-5.61656	0.0831408	0.0858265		gene;var:NR5A2|
chr1:199239884-200137649_2	chr1:199779779:rs265450:T:C	-5.507	0.0830744	0.0857702		gene;var:NR5A2|
chr1:199239884-200137649_2	chr1:199742676:rs2435227:A:G	-5.62848	0.0824502	0.085121		gene;var:NR5A2|
chr1:200137649-201589975_2	chr1:200841534:rs12120209:A:G	-6.07115	0.937724	0.870546	Promoter|	gene;var:GPR25|
chr1:200137649-201589975_1	chr1:200336075:rs2808510:T:C	-12.1684	0.110427	0.148326		gene;var:LINC00862|
chr1:200137649-201589975_1	chr1:200343081:rs2808514:A:G	-12.193	0.240932	0.143267	Promoter|peak|	gene;var:LINC00862|
chr1:200137649-201589975_1	chr1:200346324:rs2808515:A:G	-12.1911	0.10466	0.140764		gene;var:LINC00862|
chr1:200137649-201589975_1	chr1:200336096:rs2808511:T:C	-12.1606	0.102712	0.137905		gene;var:LINC00862|
chr1:200137649-201589975_1	chr1:200324163:rs12086509:T:C	-12.1801	0.0865376	0.11741		gene;var:LINC00862|
chr1:200137649-201589975_1	chr1:200332551:rs2790141:A:G	-12.1751	0.148393	0.112431	peak|	gene;var:LINC00862|
chr1:200137649-201589975_2	chr1:200702431:rs12025389:T:C	-6.55116	0.0800229	0.112347		gene;var:CAMSAP2|
chr1:200137649-201589975_1	chr1:200326361:rs2790132:T:C	-12.1742	0.0823213	0.111617		gene;var:LINC00862|
chr1:200137649-201589975_1	chr1:200319194:rs2808485:T:C	-12.1717	0.0806024	0.109255		gene;var:LINC00862|
chr1:200137649-201589975_1	chr1:200318170:rs2808484:T:C	-12.1696	0.0791965	0.107323		gene;var:LINC00862|
chr1:200137649-201589975_1	chr1:200326511:rs2808492:C:G	-12.1643	0.0757981	0.102653		gene;var:LINC00862|
chr1:200137649-201589975_2	chr1:200704754:rs10494819:T:C	-6.46292	0.0632266	0.0844913		gene;var:CAMSAP2|
chr1:200137649-201589975_2	chr1:200703434:rs10494820:A:T	-6.44073	0.0605847	0.0803874		gene;var:CAMSAP2|
chr1:203334734-204681068_1	chr1:204449157:rs6692377:A:G	-5.85574	0.668647	0.375897	CRE|peak|	gene;var:PIK3C2B|cre:PIK3C2B|
chr1:203334734-204681068_1	chr1:204450482:rs938125:A:G	-5.55152	0.298071	0.36107	peak|	gene;var:PIK3C2B|
chr1:203334734-204681068_1	chr1:204450467:rs938126:T:C	-5.53993	0.295187	0.357991	peak|	gene;var:PIK3C2B|
chr1:203334734-204681068_1	chr1:204449952:rs7519417:T:C	-5.51388	0.688413	0.351285	CRE|peak|	gene;var:PIK3C2B|cre:PIK3C2B|
chr1:203334734-204681068_1	chr1:204451495:rs4951382:T:C	-5.52209	0.28823	0.349696	peak|	gene;var:PIK3C2B|
chr1:203334734-204681068_1	chr1:204456282:rs4951387:A:G	-5.49646	0.169717	0.349175		gene;var:PIK3C2B|
chr1:203334734-204681068_1	chr1:204453784:rs11240749:A:C	-5.48261	0.166423	0.344087		gene;var:PIK3C2B|
chr1:203334734-204681068_1	chr1:204451086:rs10900590:T:C	-5.47307	0.165073	0.341819		gene;var:PIK3C2B|
chr1:203334734-204681068_1	chr1:204454165:rs4951385:T:C	-5.46428	0.163848	0.339759		gene;var:PIK3C2B|
chr1:203334734-204681068_1	chr1:204449434:rs6594014:A:G	-5.69817	0.138797	0.321902		gene;var:PIK3C2B|
chr1:203334734-204681068_1	chr1:204494283:rs3789052:T:C	5.67848	0.291738	0.310584	Promoter|peak|	gene;var:MDM4|	1:204494283:T:C:MDM4|
chr1:203334734-204681068_1	chr1:204494436:rs3789051:T:C	5.67772	0.291614	0.310449	Promoter|peak|	gene;var:MDM4|	1:204494436:T:C:MDM4|
chr1:203334734-204681068_1	chr1:204492784:rs35666383:T:C	5.65199	0.134361	0.305955		gene;var:MDM4|
chr1:203334734-204681068_1	chr1:204477525:rs12034564:A:T	5.6162	0.226957	0.299157	peak|	gene;var:MDM4|	1:204477525:A:T:MDM4|
chr1:203334734-204681068_1	chr1:204530502:rs12756329:C:G	5.56778	0.129141	0.295348		gene;var:MDM4|
chr1:203334734-204681068_1	chr1:204548132:rs12730457:A:C	5.55507	0.222158	0.293482	peak|	gene;var:MDM4|	1:204548132:A:C:MDM4|
chr1:203334734-204681068_1	chr1:204505487:rs10458588:T:C	5.56477	0.128011	0.292339		gene;var:MDM4|
chr1:203334734-204681068_1	chr1:204509305:rs12047467:T:C	5.53378	0.126902	0.290469		gene;var:MDM4|
chr1:203334734-204681068_1	chr1:204530924:rs12030639:T:C	5.52654	0.126448	0.289476		gene;var:MDM4|
chr1:203334734-204681068_1	chr1:204546987:rs34812029:A:G	5.52563	0.126391	0.289352		gene;var:MDM4|
chr1:203334734-204681068_1	chr1:204519187:rs4252745:C:G	5.51891	0.608043	0.288446	3_UTR|peak|	gene;var:MDM4|	1:204519187:C:G:MDM4|
chr1:203334734-204681068_1	chr1:204510528:rs4252713:A:G	5.53586	0.12617	0.288352		gene;var:MDM4|
chr1:203334734-204681068_1	chr1:204525568:rs10900598:T:G	5.51239	0.606758	0.287579	3_UTR|	gene;var:MDM4|	1:204525568:T:G:MDM4|
chr1:203334734-204681068_1	chr1:204532659:rs12032618:T:C	5.51046	0.606381	0.287325	Exon|	gene;var:MDM4|	1:204532659:T:C:MDM4|
chr1:203334734-204681068_1	chr1:204526721:rs12118859:A:G	5.50561	0.60544	0.286692	3_UTR|	gene;var:MDM4|	1:204526721:A:G:MDM4|
chr1:203334734-204681068_1	chr1:204513402:rs4252726:A:G	5.4829	0.123873	0.283819		gene;var:MDM4|
chr1:204681068-206073265_1	chr1:205312280:rs7549293:C:G	5.50384	0.321832	0.768957		gene;var:KLHDC8A|
chr1:204681068-206073265_1	chr1:205315242:rs11590464:C:G	5.47148	0.968888	0.7304	CRE|peak|	gene;var:KLHDC8A|cre:MFSD4A|cre:KLHDC8A|
chr1:206073265-208410364_1	chr1:207488004:rs1858001:C:G	-13.797	1	1		gene;var:CD55|
chr1:206073265-208410364_5	chr1:207510596:rs10746463:A:G	-12.6595	1	1		gene;var:CD55|
chr1:206073265-208410364_9	chr1:207394983:rs6540874:T:C	8.9186	0.850541	0.85073		gene;var:CD55|
chr1:206073265-208410364_6	chr1:207443571:rs6703860:A:C	-13.4061	0.825671	0.825686		gene;var:CD55|
chr1:206073265-208410364_7	chr1:207378841:rs7543002:A:G	-12.8688	0.657154	0.657658		gene;var:C4BPA|
chr1:206073265-208410364_4	chr1:207454596:rs6660557:C:G	9.26781	0.334815	0.33594		gene;var:CD55|
chr1:206073265-208410364_7	chr1:207387766:rs1346720:T:C	-12.861	0.30659	0.307067		gene;var:CD55|
chr1:206073265-208410364_3	chr1:206606078:rs2987936:C:G	-5.81408	0.134809	0.289611		gene;var:SRGAP2|
chr1:206073265-208410364_4	chr1:207465437:rs2782850:A:T	9.2616	0.178682	0.17951		gene;var:CD55|
chr1:206073265-208410364_9	chr1:207390204:rs6673080:T:C	8.939	0.150663	0.15133		gene;var:CD55|
chr1:206073265-208410364_3	chr1:206623866:rs11809494:T:C	-5.86464	0.0680746	0.128484		gene;var:IKBKE|
chr1:206073265-208410364_4	chr1:207464041:rs2564970:A:C	9.25713	0.114038	0.114808		gene;var:CD55|
chr1:206073265-208410364_3	chr1:206624362:rs4127124:A:C	-5.83813	0.0587831	0.110895		gene;var:IKBKE|
chr1:206073265-208410364_3	chr1:206620173:rs2336939:A:T	-5.82739	0.329061	0.104508	CRE|DAR|peak|	gene;var:IKBKE|cre:SRGAP2|
chr1:206073265-208410364_4	chr1:207457147:rs7521457:A:G	9.25602	0.101994	0.10276		gene;var:CD55|
chr1:206073265-208410364_3	chr1:206622288:rs10779631:T:C	-5.81676	0.0950107	0.0985627	peak|	gene;var:IKBKE|
chr1:206073265-208410364_6	chr1:207410965:rs7522701:T:C	-13.3859	0.095973	0.0968062		gene;var:CD55|
chr1:206073265-208410364_2	chr1:208131050:rs7519724:A:C	-8.28786	0.125696	0.0936142	peak|	gene;var:CD34|
chr1:206073265-208410364_4	chr1:207465062:rs2782851:T:C	9.25333	0.0779809	0.0787458		gene;var:CD55|
chr1:206073265-208410364_3	chr1:206624643:rs3860302:C:G	-5.77298	0.0411883	0.0775983		gene;var:IKBKE|
chr1:206073265-208410364_4	chr1:207460308:rs10494889:T:C	9.25279	0.0739014	0.0746673		gene;var:CD55|
chr1:206073265-208410364_4	chr1:207459191:rs6668683:T:C	9.25023	0.0573012	0.0580757		gene;var:CD55|
chr1:206073265-208410364_3	chr1:206621028:rs61817176:A:C	-5.77987	0.158281	0.0492241	CRE|DAR|peak|	gene;var:IKBKE|cre:SRGAP2|
chr1:206073265-208410364_6	chr1:207440851:rs6540896:T:C	-13.3786	0.0445439	0.0454031		gene;var:CD55|
chr1:206073265-208410364_2	chr1:208131044:rs7522233:T:C	-8.62299	0.0571464	0.044235	peak|	gene;var:CD34|
chr1:206073265-208410364_4	chr1:207458906:rs6658718:T:G	9.2463	0.0388717	0.039666		gene;var:CD55|
chr1:206073265-208410364_2	chr1:208127473:rs1074328:T:C	-8.52607	0.0283321	0.0390609		gene;var:CD34|
chr1:206073265-208410364_2	chr1:208131582:rs35649338:T:G	-8.1829	0.0294848	0.0387572		gene;var:CD34|
chr1:206073265-208410364_2	chr1:208140828:rs11118964:T:C	-8.15586	0.0261861	0.0344917		gene;var:CD34|
chr1:206073265-208410364_2	chr1:208130656:rs11579168:A:G	-8.16652	0.0470705	0.0339167	peak|	gene;var:CD34|
chr1:206073265-208410364_3	chr1:206616101:rs11120291:A:G	-5.76802	0.0176793	0.0326775		gene;var:IKBKE|
chr1:206073265-208410364_2	chr1:208126812:rs11580286:T:C	-8.60278	0.0428127	0.0326223	peak|	gene;var:CD34|
chr1:206073265-208410364_2	chr1:208136930:rs12753391:A:C	-8.19949	0.0414319	0.0293654	peak|	gene;var:CD34|
chr1:206073265-208410364_3	chr1:206618799:rs2336938:A:C	-5.74497	0.0157527	0.0290929		gene;var:IKBKE|
chr1:206073265-208410364_3	chr1:206625695:rs963893:A:G	-5.7401	0.0153769	0.0283937		gene;var:IKBKE|
chr1:206073265-208410364_3	chr1:206618875:rs11579993:A:G	-5.73464	0.0149669	0.0276308		gene;var:IKBKE|
chr1:206073265-208410364_2	chr1:208130627:rs11579568:T:G	-8.17725	0.0202961	0.0263393		gene;var:CD34|
chr1:206073265-208410364_2	chr1:208109185:rs12095883:A:G	-8.29775	0.0197911	0.0261571		gene;var:CD34|
chr1:206073265-208410364_2	chr1:208125773:rs1932825:A:T	-8.57009	0.0182803	0.0251174		gene;var:CD34|
chr1:206073265-208410364_2	chr1:208131281:rs11581407:A:G	-8.55055	0.0178261	0.0246124		gene;var:CD34|
chr1:206073265-208410364_2	chr1:208131076:rs11579609:A:G	-8.5453	0.0311243	0.0236165	peak|	gene;var:CD34|
chr1:206073265-208410364_2	chr1:208131441:rs34461385:T:C	-8.54228	0.0167342	0.0230634		gene;var:CD34|
chr1:206073265-208410364_2	chr1:208116590:rs11118957:T:C	-8.19688	0.0322958	0.0228196	peak|	gene;var:CD34|
chr1:206073265-208410364_2	chr1:208131663:rs35899323:A:G	-8.53654	0.0160201	0.0220528		gene;var:CD34|
chr1:206073265-208410364_2	chr1:208128855:rs11579848:A:G	-8.54694	0.0153256	0.0209566		gene;var:CD34|
chr1:206073265-208410364_2	chr1:208133497:rs11580769:A:G	-8.52761	0.0272178	0.0205774	peak|	gene;var:CD34|
chr1:206073265-208410364_2	chr1:208134887:rs11583119:A:G	-8.52546	0.0147346	0.0202391		gene;var:CD34|
chr1:206073265-208410364_2	chr1:208133887:rs11118961:A:T	-8.52433	0.026554	0.0200629	peak|	gene;var:CD34|
chr1:206073265-208410364_2	chr1:208134934:rs11581797:A:C	-8.52209	0.0143662	0.0197206		gene;var:CD34|
chr1:206073265-208410364_2	chr1:208130720:rs7519609:T:C	-8.52077	0.0258545	0.0195215	peak|	gene;var:CD34|
chr1:206073265-208410364_2	chr1:208129604:rs35935287:A:G	-8.51881	0.0139833	0.0193614		gene;var:CD34|
chr1:206073265-208410364_2	chr1:208130905:rs7552993:T:C	-8.51499	0.0247634	0.0186783	peak|	gene;var:CD34|
chr1:206073265-208410364_2	chr1:208125926:rs1932824:A:C	-8.52901	0.0134007	0.0182656		gene;var:CD34|
chr1:206073265-208410364_2	chr1:208129444:rs35100559:T:C	-8.52886	0.0133851	0.0182439		gene;var:CD34|
chr1:206073265-208410364_2	chr1:208127490:rs1074327:A:C	-8.52854	0.013354	0.0182006		gene;var:CD34|
chr1:206073265-208410364_2	chr1:208130682:rs11584869:T:C	-8.51056	0.02396	0.0180585	peak|	gene;var:CD34|
chr1:206073265-208410364_2	chr1:208129065:rs11578508:A:G	-8.52531	0.0130374	0.0177598		gene;var:CD34|
chr1:206073265-208410364_2	chr1:208134272:rs11118962:T:C	-8.50667	0.0128079	0.0175348		gene;var:CD34|
chr1:206073265-208410364_2	chr1:208129688:rs12065224:T:C	-8.52209	0.0127305	0.0173329		gene;var:CD34|
chr1:206073265-208410364_2	chr1:208129553:rs35356517:A:G	-8.52077	0.0126068	0.0171611		gene;var:CD34|
chr1:206073265-208410364_2	chr1:208129132:rs35149591:T:C	-8.51123	0.011754	0.0159783		gene;var:CD34|
chr1:206073265-208410364_2	chr1:208128822:rs11578506:T:C	-8.50922	0.0115833	0.015742		gene;var:CD34|
chr1:206073265-208410364_2	chr1:208132904:rs2785632:C:G	-8.17837	0.0238512	0.0155226	peak|	gene;var:CD34|
chr1:206073265-208410364_2	chr1:208135969:rs507920:T:C	-8.17791	0.0130861	0.0154726		gene;var:CD34|
chr1:206073265-208410364_2	chr1:208130219:rs12066542:T:C	-8.06225	0.0117078	0.0150926		gene;var:CD34|
chr1:206073265-208410364_2	chr1:208128008:rs11118960:A:G	-8.50135	0.0109391	0.0148519		gene;var:CD34|
chr1:206073265-208410364_2	chr1:208130418:rs11579530:T:C	-8.48256	0.0107381	0.0146517		gene;var:CD34|
chr1:206073265-208410364_2	chr1:208127073:rs7517152:A:G	-8.49944	0.0107895	0.0146456		gene;var:CD34|
chr1:206073265-208410364_2	chr1:208130245:rs13374332:A:G	-8.48166	0.010669	0.014556		gene;var:CD34|
chr1:206073265-208410364_2	chr1:208128618:rs11578041:A:G	-8.49781	0.010663	0.0144713		gene;var:CD34|
chr1:206073265-208410364_2	chr1:208130104:rs12066493:T:C	-8.48072	0.010597	0.0144561		gene;var:CD34|
chr1:206073265-208410364_2	chr1:208129880:rs12079386:T:C	-8.48031	0.0105654	0.0144123		gene;var:CD34|
chr1:206073265-208410364_2	chr1:208128205:rs13374460:T:G	-8.49596	0.010522	0.0142771		gene;var:CD34|
chr1:206073265-208410364_2	chr1:208128373:rs11579772:A:G	-8.49356	0.0103421	0.0140294		gene;var:CD34|
chr1:206073265-208410364_2	chr1:208126139:rs11579778:A:T	-8.53671	0.00874761	0.011603		gene;var:CD34|
chr1:208410364-210787750_2	chr1:210321043:rs11119421:A:G	-7.07138	0.381131	0.65335		gene;var:SYT14|
chr1:208410364-210787750_2	chr1:210322929:rs7516843:A:G	-7.02895	0.366802	0.632695		gene;var:SYT14|
chr1:208410364-210787750_2	chr1:210322825:rs11119422:T:C	-7.01334	0.362614	0.626645		gene;var:SYT14|
chr1:208410364-210787750_2	chr1:210335066:rs4609425:A:G	-7.00297	0.968345	0.623025	3_UTR|	gene;var:SYT14|
chr1:208410364-210787750_2	chr1:210324957:rs12029138:A:G	-6.99818	0.56161	0.621457	peak|	gene;var:SYT14|
chr1:208410364-210787750_2	chr1:210331585:rs4537554:T:C	-6.98802	0.356856	0.618322		gene;var:SYT14|
chr1:208410364-210787750_2	chr1:210335028:rs4271216:T:C	-6.98557	0.96659	0.617607	3_UTR|	gene;var:SYT14|
chr1:208410364-210787750_2	chr1:210330160:rs7527845:T:C	-6.97517	0.354374	0.614732		gene;var:SYT14|
chr1:208410364-210787750_2	chr1:210333776:rs7535045:A:G	-6.85058	0.341682	0.596306		gene;var:SYT14|
chr1:208410364-210787750_2	chr1:210302043:rs12739243:T:C	-5.75829	0.330959	0.578445		gene;var:SYT14|
chr1:208410364-210787750_2	chr1:210280845:rs10863810:A:T	-5.77969	0.329758	0.577133		gene;var:SYT14|
chr12:101862690-102964986_1	chr12:102838128:rs11111274:A:G	5.58619	0.79939	0.79939		gene;var:IGF1|
chr12:101862690-102964986_1	chr12:102797293:rs1520222:A:G	5.51378	0.700443	0.700443		gene;var:IGF1|
chr12:106436213-106958748_1	chr12:106683319:rs76584958:T:C	-6.15315	0.767947	0.8145		gene;var:TCP11L2|
chr12:106436213-106958748_1	chr12:106716441:rs17218455:T:C	-6.31203	0.747094	0.796757		gene;var:TCP11L2|
chr12:106436213-106958748_1	chr12:106696557:rs10861574:C:G	-5.75785	0.867703	0.672799	Promoter|	gene;var:TCP11L2|
chr12:106436213-106958748_1	chr12:106698334:rs904614:A:C	-5.73525	0.556457	0.668323		gene;var:TCP11L2|
chr12:106436213-106958748_1	chr12:106697802:rs17217845:A:G	-5.88762	0.824007	0.602479	Promoter|peak|	gene;var:TCP11L2|
chr12:106436213-106958748_1	chr12:106693710:rs35816179:T:C	-5.83829	0.489606	0.576924		gene;var:TCP11L2|
chr12:106436213-106958748_1	chr12:106682917:rs12831519:A:G	-5.75299	0.485497	0.57568		gene;var:TCP11L2|
chr12:106436213-106958748_1	chr12:106694988:rs2279759:T:C	-5.79344	0.482406	0.569006		gene;var:TCP11L2|
chr12:106436213-106958748_1	chr12:106686260:rs7314289:A:C	-5.77857	0.481489	0.567808		gene;var:TCP11L2|
chr12:106436213-106958748_1	chr12:106688576:rs10861572:T:C	-5.4527	0.452165	0.534809		gene;var:TCP11L2|
chr12:119754110-122007651_1	chr12:121364503:rs10849818:A:T	-5.49227	0.759216	0.759216		gene;var:SPPL3|
chr12:119754110-122007651_1	chr12:121363724:rs6489785:T:C	-5.47223	0.740623	0.740623		gene;var:SPPL3|
chr12:12733528-15241484_1	chr12:14043113:rs61914291:A:T	-10.3626	0.721928	0.982184		gene;var:GRIN2B|
chr12:12733528-15241484_2	chr12:12869936:rs36228499:A:C	-5.51408	0.885205	0.795988	Promoter|peak|	gene;var:CDKN1B|	12:12869936:A:C:CDKN1B|
chr12:12733528-15241484_4	chr12:13940848:rs2268127:T:C	-5.69019	0.166827	0.649962		gene;var:GRIN2B|
chr12:12733528-15241484_2	chr12:12866901:rs2080747:A:C	5.89202	0.111242	0.201963		gene;var:CDKN1B|
chr12:12733528-15241484_2	chr12:12864389:rs2417223:A:G	5.79488	0.152997	0.151423	peak|	gene;var:CDKN1B|
chr12:12733528-15241484_3	chr12:13991914:rs12319253:A:G	5.97358	0.401587	0.133087	CRE|peak|	gene;var:GRIN2B|cre:GRIN2B|
chr12:12733528-15241484_4	chr12:13994720:rs2284426:T:G	-6.07654	0.0741947	0.116532		gene;var:GRIN2B|
chr12:12733528-15241484_4	chr12:13960399:rs220582:A:G	-5.52057	0.405075	0.112342	CRE|DAR|peak|	gene;var:GRIN2B|cre:GRIN2B|
chr12:12733528-15241484_3	chr12:13993896:rs73055666:T:C	5.95373	0.0671434	0.109689		gene;var:GRIN2B|
chr12:12733528-15241484_3	chr12:13987785:rs73055660:A:C	5.95039	0.0600319	0.104437		gene;var:GRIN2B|
chr12:12733528-15241484_3	chr12:13988916:rs11608471:A:G	5.93083	0.316586	0.101399	CRE|DAR|peak|	gene;var:GRIN2B|cre:GRIN2B|
chr12:12733528-15241484_3	chr12:13988493:rs12317299:A:G	5.90141	0.0544151	0.0928364		gene;var:GRIN2B|
chr12:12733528-15241484_3	chr12:13994087:rs12318431:A:G	5.86777	0.0541166	0.0912999		gene;var:GRIN2B|
chr12:12733528-15241484_3	chr12:14005095:rs2193513:A:C	5.88602	0.0951867	0.0893435	peak|	gene;var:GRIN2B|
chr12:12733528-15241484_4	chr12:14024906:rs7959821:T:C	-6.85045	0.0621174	0.0884693		gene;var:GRIN2B|
chr12:12733528-15241484_4	chr12:14020737:rs10845847:A:C	-6.86793	0.0607387	0.0847128		gene;var:GRIN2B|
chr12:12733528-15241484_3	chr12:14000589:rs12303170:A:G	5.87226	0.0852994	0.0794153	peak|	gene;var:GRIN2B|
chr12:12733528-15241484_3	chr12:13960809:rs11615752:A:G	5.83659	0.083708	0.0768368	peak|	gene;var:GRIN2B|
chr12:12733528-15241484_3	chr12:13998919:rs73055679:A:G	5.83775	0.0475191	0.0738724		gene;var:GRIN2B|
chr12:12733528-15241484_3	chr12:13985189:rs10492138:A:G	5.81068	0.0452714	0.0735394		gene;var:GRIN2B|
chr12:12733528-15241484_3	chr12:13972365:rs73055639:A:T	5.80611	0.0449274	0.0727966		gene;var:GRIN2B|
chr12:12733528-15241484_3	chr12:13982424:rs12298994:T:C	5.86176	0.0444258	0.0727102		gene;var:GRIN2B|
chr12:12733528-15241484_3	chr12:13983882:rs73055652:A:G	5.80585	0.044141	0.0711657		gene;var:GRIN2B|
chr12:12733528-15241484_3	chr12:13981727:rs2160733:A:C	5.80538	0.0441081	0.0710944		gene;var:GRIN2B|
chr12:12733528-15241484_3	chr12:13975692:rs7964929:T:C	5.80235	0.0438987	0.0706401		gene;var:GRIN2B|
chr12:12733528-15241484_3	chr12:13958722:rs12317483:A:G	5.79002	0.0432164	0.0693061		gene;var:GRIN2B|
chr12:12733528-15241484_3	chr12:13962791:rs73055630:A:G	5.73797	0.0772561	0.0691111	peak|	gene;var:GRIN2B|
chr12:12733528-15241484_3	chr12:13952650:rs11055624:A:T	5.78783	0.043076	0.0689983		gene;var:GRIN2B|
chr12:12733528-15241484_3	chr12:13968405:rs12300851:T:C	5.77165	0.0426206	0.0677529		gene;var:GRIN2B|
chr12:12733528-15241484_3	chr12:13947499:rs73053682:T:C	5.77167	0.042094	0.0668298		gene;var:GRIN2B|
chr12:12733528-15241484_3	chr12:13966421:rs10845842:T:C	5.76207	0.0420634	0.0665136		gene;var:GRIN2B|
chr12:12733528-15241484_4	chr12:13996606:rs4764036:A:G	-5.82852	0.0661228	0.0597876		gene;var:GRIN2B|
chr12:12733528-15241484_4	chr12:13996273:rs2193509:T:C	-5.82855	0.0661202	0.059785		gene;var:GRIN2B|
chr12:12733528-15241484_4	chr12:13958363:rs10845841:C:G	-5.51011	0.063053	0.0561966		gene;var:GRIN2B|
chr12:12733528-15241484_4	chr12:13948270:rs12826365:A:G	-7.71949	0.0501857	0.0546468		gene;var:GRIN2B|
chr12:12733528-15241484_4	chr12:13959441:rs34487084:T:C	-7.87664	0.0425542	0.0472252		gene;var:GRIN2B|
chr1:212842330-214578266_3	chr1:214125854:rs2075425:A:G	5.81366	0.539833	0.570698		gene;var:LINC00538|
chr1:212842330-214578266_3	chr1:214135660:rs6700065:T:G	5.7931	0.453663	0.486619		gene;var:PROX1|
chr1:212842330-214578266_3	chr1:214135997:rs12733434:A:C	5.74902	0.444702	0.477301		gene;var:PROX1|
chr1:212842330-214578266_3	chr1:214135922:rs6697742:A:G	5.74383	0.442757	0.47536		gene;var:PROX1|
chr1:212842330-214578266_3	chr1:214137496:rs6666781:C:G	5.73951	0.441889	0.474464		gene;var:PROX1|
chr1:212842330-214578266_3	chr1:214137475:rs6658055:T:C	5.7379	0.441568	0.474133		gene;var:PROX1|
chr1:212842330-214578266_3	chr1:214134626:rs6696610:T:C	5.73183	0.440379	0.472908		gene;var:PROX1|
chr1:212842330-214578266_3	chr1:214138105:rs12089247:A:G	5.65188	0.435006	0.467939		gene;var:PROX1|
chr1:212842330-214578266_3	chr1:214129126:rs340869:T:C	5.69331	0.434344	0.466655		gene;var:LINC00538|
chr1:212842330-214578266_3	chr1:214133468:rs7548778:T:C	5.69845	0.654274	0.466651	peak|	gene;var:PROX1|
chr1:212842330-214578266_3	chr1:214128908:rs340870:T:C	5.69222	0.434157	0.466463		gene;var:LINC00538|
chr1:212842330-214578266_3	chr1:214126621:rs7526703:A:C	5.69181	0.434088	0.466392		gene;var:LINC00538|
chr1:212842330-214578266_3	chr1:214142447:rs17762752:A:G	5.60951	0.649259	0.462855	peak|	gene;var:PROX1|
chr1:212842330-214578266_3	chr1:214127887:rs340840:T:G	5.65549	0.427612	0.459783		gene;var:LINC00538|
chr1:212842330-214578266_3	chr1:214128188:rs10494974:T:C	5.65395	0.427395	0.45956		gene;var:LINC00538|
chr1:212842330-214578266_3	chr1:214129213:rs35589948:A:C	5.59715	0.420444	0.452465		gene;var:LINC00538|
chr12:130377921-131786751_2	chr12:130941761:rs61935898:T:C	6.43325	0.513802	0.352491	DAR|peak|	gene;var:RIMBP2|
chr12:130377921-131786751_2	chr12:130941473:rs1356082:T:C	6.41065	0.462801	0.302886	DAR|peak|	gene;var:RIMBP2|
chr12:130377921-131786751_2	chr12:130941150:rs2277361:C:G	6.39325	0.487375	0.2354	5_UTR|	gene;var:RIMBP2|
chr12:130377921-131786751_2	chr12:130940960:rs2277360:T:C	6.3252	0.0866905	0.225394		gene;var:RIMBP2|
chr12:130377921-131786751_2	chr12:130941338:rs1356081:A:G	6.28179	0.0730486	0.176142		gene;var:RIMBP2|
chr12:130377921-131786751_2	chr12:130939908:rs2048777:A:G	6.14884	0.0626999	0.135163		gene;var:RIMBP2|
chr12:130377921-131786751_2	chr12:130936872:rs10848103:A:G	6.1344	0.0598044	0.12501		gene;var:RIMBP2|
chr12:132807034-133841511_1	chr12:133684321:rs905224:T:G	6.43084	0.139259	0.310433		gene;var:ZNF891|
chr12:132807034-133841511_1	chr12:133683261:rs905226:T:C	6.42177	0.714552	0.291154	3_UTR|	gene;var:ZNF891|
chr12:132807034-133841511_1	chr12:133687251:rs11147233:A:G	6.4183	0.128979	0.287522		gene;var:ZNF891|
chr12:132807034-133841511_1	chr12:133730500:rs7970687:T:C	6.21258	0.065924	0.14286		gene;var:ZNF10|
chr12:132807034-133841511_1	chr12:133683628:rs1025:A:T	5.87416	0.266689	0.0885199	3_UTR|	gene;var:ZNF891|
chr12:132807034-133841511_1	chr12:133708887:rs10870583:T:C	5.798	0.0435927	0.0851842		gene;var:ZNF10|
chr12:132807034-133841511_1	chr12:133704270:rs7138056:T:C	5.7521	0.0425705	0.0825908		gene;var:ZNF891|
chr12:132807034-133841511_1	chr12:133683750:rs1026:A:C	5.70259	0.2526	0.0807381	3_UTR|	gene;var:ZNF891|
chr12:132807034-133841511_1	chr12:133702160:rs7314723:T:C	5.68528	0.0420404	0.0805841		gene;var:ZNF891|
chr12:132807034-133841511_1	chr12:133702615:rs2062719:A:G	5.68515	0.0420394	0.0805805		gene;var:ZNF891|
chr12:132807034-133841511_1	chr12:133693142:rs11147238:T:C	5.69482	0.0420405	0.0805255		gene;var:ZNF891|
chr12:132807034-133841511_1	chr12:133710824:rs7305166:A:G	5.65727	0.0412459	0.0793112		gene;var:ZNF10|
chr12:132807034-133841511_1	chr12:133682655:rs710945:A:G	5.63714	0.250826	0.0793068	Exon|	gene;var:ZNF891|
chr12:132807034-133841511_1	chr12:133706512:rs11147248:T:C	5.67181	0.0935006	0.0792201	Promoter|peak|	gene;var:ZNF891|
chr12:132807034-133841511_1	chr12:133736662:rs7957365:T:C	5.65582	0.0411768	0.0791453		gene;var:ZNF268|
chr12:132807034-133841511_1	chr12:133710501:rs7305560:A:T	5.64941	0.0411665	0.0790996		gene;var:ZNF10|
chr12:132807034-133841511_1	chr12:133683280:rs905225:A:T	5.6206	0.25068	0.0790662	3_UTR|	gene;var:ZNF891|
chr12:132807034-133841511_1	chr12:133692329:rs12422899:T:C	5.61915	0.0417309	0.0790474		gene;var:ZNF891|
chr12:132807034-133841511_1	chr12:133694626:rs7967886:A:G	5.61019	0.0417249	0.0789381		gene;var:ZNF891|
chr12:132807034-133841511_1	chr12:133737311:rs10870587:C:G	5.65253	0.0410676	0.0788504		gene;var:ZNF268|
chr12:132807034-133841511_1	chr12:133721817:rs11147254:T:C	5.63704	0.0409403	0.0784934		gene;var:ZNF10|
chr12:132807034-133841511_1	chr12:133713921:rs10870584:A:C	5.63535	0.0409275	0.078457		gene;var:ZNF10|
chr12:132807034-133841511_1	chr12:133718507:rs11147252:A:C	5.63252	0.0409065	0.0783965		gene;var:ZNF10|
chr12:132807034-133841511_1	chr12:133717054:rs59272889:A:G	5.63193	0.0409022	0.0783843		gene;var:ZNF10|
chr12:132807034-133841511_1	chr12:133714791:rs12313498:A:T	5.62735	0.0408696	0.0782898		gene;var:ZNF10|
chr12:132807034-133841511_1	chr12:133716904:rs55864270:T:C	5.62519	0.0408548	0.0782465		gene;var:ZNF10|
chr12:132807034-133841511_1	chr12:133722268:rs10083052:A:G	5.60232	0.0408423	0.0781902		gene;var:ZNF10|
chr12:132807034-133841511_1	chr12:133717204:rs12305745:A:G	5.62041	0.0408232	0.0781531		gene;var:ZNF10|
chr12:132807034-133841511_1	chr12:133715587:rs10870585:T:G	5.61313	0.0407779	0.0780173		gene;var:ZNF10|
chr12:132807034-133841511_1	chr12:133726842:rs6560922:T:G	5.60314	0.0407544	0.077964		gene;var:ZNF10|
chr12:132807034-133841511_1	chr12:133726921:rs6560923:T:C	5.60069	0.0407398	0.0779199		gene;var:ZNF10|
chr12:132807034-133841511_1	chr12:133726712:rs6560921:A:G	5.60714	0.0407435	0.0779117		gene;var:ZNF10|
chr12:132807034-133841511_1	chr12:133713440:rs11147250:A:G	5.5962	0.040687	0.0777325		gene;var:ZNF10|
chr12:132807034-133841511_1	chr12:133726951:rs6560924:A:G	5.58308	0.0406467	0.0776291		gene;var:ZNF10|
chr1:216243634-218705513_2	chr1:218594920:rs1934852:T:G	-5.65016	0.72594	0.447855	CRE|peak|	gene;var:TGFB2-AS1|cre:TGFB2-AS1|cre:TGFB2|
chr1:216243634-218705513_2	chr1:218596461:rs6657275:A:G	-5.64508	0.184898	0.446491		gene;var:TGFB2-AS1|
chr1:216243634-218705513_2	chr1:218596641:rs6668651:T:G	-5.64488	0.184872	0.446436		gene;var:TGFB2-AS1|
chr1:216243634-218705513_2	chr1:218617900:rs6683598:T:C	-5.64137	0.765376	0.445521	3_UTR|	gene;var:TGFB2-AS1|
chr1:216243634-218705513_2	chr1:218617543:rs6704255:A:G	-5.6227	0.760658	0.44099	3_UTR|	gene;var:TGFB2-AS1|
chr1:216243634-218705513_2	chr1:218597044:rs6671370:A:G	-5.62215	0.18228	0.440865		gene;var:TGFB2-AS1|
chr1:216243634-218705513_2	chr1:218597297:rs12048049:C:G	-5.61843	0.181894	0.440033		gene;var:TGFB2-AS1|
chr1:216243634-218705513_2	chr1:218619646:rs1342590:T:C	-5.6162	0.717006	0.439544	CRE|peak|	gene;var:TGFB2-AS1|cre:TGFB2|
chr1:216243634-218705513_2	chr1:218598484:rs4846481:T:C	-5.61028	0.181082	0.438282		gene;var:TGFB2-AS1|
chr1:216243634-218705513_2	chr1:218591623:rs11466399:A:G	-5.58322	0.178684	0.433149		gene;var:TGFB2-AS1|
chr1:216243634-218705513_2	chr1:218605609:rs10482795:A:G	-5.579	0.178385	0.432441		gene;var:TGFB2-AS1|
chr1:216243634-218705513_2	chr1:218610254:rs1418553:T:C	-5.57327	0.177958	0.431512		gene;var:TGFB2-AS1|
chr1:216243634-218705513_2	chr1:218615451:rs991967:A:C	-5.57133	0.750528	0.431207	3_UTR|	gene;var:TGFB2-AS1|
chr1:216243634-218705513_2	chr1:218609702:rs6684205:A:G	-5.56378	0.177293	0.430062		gene;var:TGFB2-AS1|
chr1:216243634-218705513_2	chr1:218617135:rs1046017:C:G	-5.53935	0.746059	0.426823	3_UTR|	gene;var:TGFB2-AS1|
chr1:216243634-218705513_2	chr1:218620199:rs12032375:T:C	-5.5213	0.174921	0.424851		gene;var:TGFB2-AS1|
chr1:216243634-218705513_2	chr1:218631452:rs6604614:C:G	-5.48139	0.172731	0.420384		gene;var:TGFB2-AS1|
chr1:216243634-218705513_2	chr1:218629029:rs1318580:T:C	-5.47943	0.172662	0.420231		gene;var:TGFB2-AS1|
chr1:218705513-219590571_10	chr1:218858427:rs28394788:A:T	5.98635	0.208534	0.236172		gene;var:TGFB2-AS1|
chr1:218705513-219590571_10	chr1:218855367:rs28627122:A:G	5.74304	0.184117	0.210347		gene;var:TGFB2-AS1|
chr1:218705513-219590571_10	chr1:218855636:rs6696363:T:C	5.69181	0.177558	0.202851		gene;var:TGFB2-AS1|
chr1:218705513-219590571_10	chr1:218854635:rs28463616:T:C	5.66964	0.172658	0.197342		gene;var:TGFB2-AS1|
chr1:218705513-219590571_10	chr1:218855281:rs28536777:A:G	5.84841	0.175427	0.195622		gene;var:TGFB2-AS1|
chr1:218705513-219590571_10	chr1:218860456:rs17505236:A:C	5.81999	0.173857	0.194056		gene;var:TGFB2-AS1|
chr1:218705513-219590571_10	chr1:218857697:rs17505041:A:C	5.83202	0.173109	0.193144		gene;var:TGFB2-AS1|
chr1:218705513-219590571_10	chr1:218826557:rs1825120:T:C	6.06169	0.157751	0.17982		gene;var:TGFB2-AS1|
chr1:218705513-219590571_10	chr1:218838553:rs17505020:A:G	5.85427	0.583903	0.179618	DAR|peak|	gene;var:TGFB2-AS1|
chr1:218705513-219590571_10	chr1:218859416:rs6674686:A:G	6.07759	0.156718	0.179071		gene;var:TGFB2-AS1|
chr1:218705513-219590571_10	chr1:218821843:rs74999470:T:G	6.01571	0.155229	0.177109		gene;var:TGFB2-AS1|
chr1:218705513-219590571_10	chr1:218858014:rs922716:T:C	6.07191	0.154903	0.176756		gene;var:TGFB2-AS1|
chr1:218705513-219590571_10	chr1:218823915:rs28865709:T:C	6.02349	0.154827	0.176686		gene;var:TGFB2-AS1|
chr1:218705513-219590571_10	chr1:218843060:rs28742268:C:G	5.82165	0.151162	0.175898		gene;var:TGFB2-AS1|
chr1:218705513-219590571_10	chr1:218843595:rs4846274:A:G	5.81257	0.150359	0.174913		gene;var:TGFB2-AS1|
chr1:218705513-219590571_10	chr1:218838876:rs4558049:T:C	6.0417	0.579546	0.174443	DAR|peak|	gene;var:TGFB2-AS1|
chr1:218705513-219590571_10	chr1:218853571:rs28734002:A:T	6.02986	0.152152	0.17387		gene;var:TGFB2-AS1|
chr1:218705513-219590571_10	chr1:218839734:rs746672:T:G	6.03395	0.151871	0.173644		gene;var:TGFB2-AS1|
chr1:218705513-219590571_10	chr1:218822450:rs114529222:T:C	5.98142	0.152003	0.173456		gene;var:TGFB2-AS1|
chr1:218705513-219590571_10	chr1:218840868:rs28407684:A:G	6.04469	0.15172	0.173244		gene;var:TGFB2-AS1|
chr1:218705513-219590571_10	chr1:218860068:rs993925:T:C	6.0233	0.151508	0.1729		gene;var:TGFB2-AS1|
chr1:218705513-219590571_10	chr1:218852147:rs28631481:T:C	5.79417	0.148402	0.172417		gene;var:TGFB2-AS1|
chr1:218705513-219590571_9	chr1:218842912:rs28394360:C:G	6.01391	0.150122	0.171647		gene;var:TGFB2-AS1|
chr1:218705513-219590571_9	chr1:218823061:rs145750618:A:G	5.96185	0.149278	0.170397		gene;var:TGFB2-AS1|
chr1:218705513-219590571_10	chr1:218841966:rs28591343:T:C	6.00924	0.1487	0.169816		gene;var:TGFB2-AS1|
chr1:218705513-219590571_10	chr1:218851318:rs28447116:A:C	6.00351	0.148237	0.169291		gene;var:TGFB2-AS1|
chr1:218705513-219590571_10	chr1:218846303:rs28698170:T:C	5.98268	0.147367	0.168278		gene;var:TGFB2-AS1|
chr1:218705513-219590571_10	chr1:218843627:rs4846498:A:G	5.99026	0.147194	0.168107		gene;var:TGFB2-AS1|
chr1:218705513-219590571_10	chr1:218844618:rs1159266:T:C	5.98643	0.146898	0.167771		gene;var:TGFB2-AS1|
chr1:218705513-219590571_10	chr1:218842766:rs28527460:T:C	5.98432	0.146737	0.167588		gene;var:TGFB2-AS1|
chr1:218705513-219590571_10	chr1:218844695:rs1159267:A:C	5.97974	0.146389	0.167195		gene;var:TGFB2-AS1|
chr1:218705513-219590571_10	chr1:218844086:rs6671148:A:G	5.97872	0.146313	0.167108		gene;var:TGFB2-AS1|
chr1:218705513-219590571_10	chr1:218845843:rs28444613:A:G	5.97288	0.145878	0.166614		gene;var:TGFB2-AS1|
chr1:218705513-219590571_10	chr1:218845697:rs28397204:T:G	5.97267	0.145863	0.166597		gene;var:TGFB2-AS1|
chr1:218705513-219590571_10	chr1:218844133:rs6671163:A:G	5.97183	0.145801	0.166527		gene;var:TGFB2-AS1|
chr1:218705513-219590571_10	chr1:218846065:rs28758260:A:C	5.94409	0.14541	0.166047		gene;var:TGFB2-AS1|
chr1:218705513-219590571_10	chr1:218847421:rs60991969:T:C	5.95354	0.145181	0.1658		gene;var:TGFB2-AS1|
chr1:218705513-219590571_10	chr1:218844436:rs28375267:A:G	5.96231	0.145108	0.165741		gene;var:TGFB2-AS1|
chr1:218705513-219590571_10	chr1:218846530:rs28642350:T:C	5.9507	0.144977	0.165568		gene;var:TGFB2-AS1|
chr1:218705513-219590571_10	chr1:218846884:rs55897955:A:G	5.94712	0.144722	0.16528		gene;var:TGFB2-AS1|
chr1:218705513-219590571_10	chr1:218844906:rs1159268:A:G	5.95656	0.144698	0.165276		gene;var:TGFB2-AS1|
chr1:218705513-219590571_10	chr1:218844505:rs28446878:A:C	5.93996	0.144353	0.164873		gene;var:TGFB2-AS1|
chr1:218705513-219590571_10	chr1:218844470:rs28729240:A:G	5.95125	0.144326	0.164854		gene;var:TGFB2-AS1|
chr1:218705513-219590571_10	chr1:218850034:rs12037944:A:T	5.94936	0.144194	0.164704		gene;var:TGFB2-AS1|
chr1:218705513-219590571_10	chr1:218851189:rs28557010:A:G	5.9407	0.143602	0.164033		gene;var:TGFB2-AS1|
chr1:218705513-219590571_10	chr1:218848717:rs72742465:A:T	5.93739	0.143379	0.16378		gene;var:TGFB2-AS1|
chr1:218705513-219590571_10	chr1:218848654:rs72742464:T:C	5.9333	0.143107	0.163472		gene;var:TGFB2-AS1|
chr1:218705513-219590571_10	chr1:218858746:rs1481361:T:C	5.91749	0.142527	0.162746		gene;var:TGFB2-AS1|
chr1:218705513-219590571_10	chr1:218856502:rs28635651:A:G	5.6858	0.142718	0.162726		gene;var:TGFB2-AS1|
chr1:218705513-219590571_10	chr1:218842201:rs28478455:A:C	5.91819	0.14213	0.162363		gene;var:TGFB2-AS1|
chr1:218705513-219590571_10	chr1:218817845:rs61822529:T:C	5.78524	0.138815	0.158526		gene;var:TGFB2-AS1|
chr1:218705513-219590571_10	chr1:218817532:rs55750150:A:G	5.76264	0.137642	0.157203		gene;var:TGFB2-AS1|
chr1:218705513-219590571_10	chr1:218843473:rs4846275:T:G	5.73848	0.134001	0.153246		gene;var:TGFB2-AS1|
chr1:219590571-221858231_3	chr1:219785593:rs11803401:T:G	-9.62623	1	1		gene;var:RNU5F-1|
chr1:219590571-221858231_2	chr1:219795761:rs59888912:A:G	7.82329	0.951873	0.952636		gene;var:RNU5F-1|
chr1:219590571-221858231_4	chr1:219787214:rs10746387:A:G	-11.295	0.925747	0.926502		gene;var:RNU5F-1|
chr1:219590571-221858231_5	chr1:219776217:rs116153184:A:G	7.90807	0.642163	0.654839		gene;var:RNU5F-1|
chr1:219590571-221858231_5	chr1:219787413:rs10779364:C:G	8.40026	0.200037	0.198968		gene;var:RNU5F-1|
chr1:219590571-221858231_1	chr1:219777721:rs11118357:A:C	-10.546	0.147456	0.183726		gene;var:RNU5F-1|
chr1:219590571-221858231_5	chr1:219775119:rs139056007:T:G	8.29142	0.160858	0.165168		gene;var:RNU5F-1|
chr1:219590571-221858231_1	chr1:219776496:rs12033783:A:G	-10.4843	0.117408	0.143795		gene;var:RNU5F-1|
chr1:219590571-221858231_1	chr1:219766732:rs6682581:A:G	-10.4239	0.112833	0.137295		gene;var:RNU5F-1|
chr1:219590571-221858231_1	chr1:219766469:rs12025671:T:C	-10.3922	0.101744	0.122871		gene;var:RNU5F-1|
chr1:219590571-221858231_1	chr1:219778959:rs148795524:T:G	-10.4257	0.0971353	0.117267		gene;var:RNU5F-1|
chr1:219590571-221858231_5	chr1:219777110:rs11118356:T:C	8.36161	0.112937	0.117077		gene;var:RNU5F-1|
chr1:219590571-221858231_1	chr1:219768131:rs72629670:A:G	-10.3751	0.0932552	0.11196		gene;var:RNU5F-1|
chr1:219590571-221858231_4	chr1:219787322:rs10746388:A:T	-11.26	0.101551	0.107393		gene;var:RNU5F-1|
chr1:219590571-221858231_1	chr1:219769141:rs113522281:T:C	-10.3233	0.083609	0.0995854		gene;var:RNU5F-1|
chr1:219590571-221858231_1	chr1:219754982:rs6677960:A:G	-9.96665	0.0853918	0.0950565		gene;var:RNU5F-1|
chr1:219590571-221858231_1	chr1:219768280:rs55727452:A:G	-10.2868	0.0745704	0.0881704		gene;var:RNU5F-1|
chr1:219590571-221858231_1	chr1:219748588:rs7526373:T:G	-9.877	0.0752567	0.0833792		gene;var:RNU5F-1|
chr1:219590571-221858231_1	chr1:219751408:rs11806200:T:C	-9.92239	0.0749026	0.0831358		gene;var:RNU5F-1|
chr1:219590571-221858231_1	chr1:219759682:rs4373767:T:C	-9.91189	0.33011	0.0812271	DAR|peak|	gene;var:RNU5F-1|
chr1:219590571-221858231_1	chr1:219744848:rs2050594:A:T	-9.82049	0.0659746	0.073241		gene;var:RNU5F-1|
chr1:219590571-221858231_1	chr1:219741333:rs12046004:C:G	-9.8595	0.115965	0.0723939	peak|	gene;var:RNU5F-1|
chr1:219590571-221858231_1	chr1:219742744:rs10779361:T:C	-9.84731	0.063916	0.0711023		gene;var:RNU5F-1|
chr1:219590571-221858231_1	chr1:219762139:rs10863467:T:C	-9.82257	0.0633655	0.0705151		gene;var:RNU5F-1|
chr1:219590571-221858231_1	chr1:219739907:rs11118343:T:G	-9.82999	0.062373	0.0694496		gene;var:RNU5F-1|
chr12:20863943-23820634_2	chr12:22514833:rs11046387:A:C	-5.99659	1	1		gene;var:ST8SIA1|
chr12:20863943-23820634_1	chr12:22536964:rs10842007:A:G	-8.2168	1	1		gene;var:ST8SIA1|
[truncated: 8,424 more rows]

## Sheet: Gharahkhani POAG
LD block	GWAS variant	Z score	functional PIP	uniform PIP	genomic annotation	linked or nearby gene	overlapped eQTL
chr10:10249396-12586797_4	chr10:10840849:rs6602453:A:C	5.91184	0.439197	0.45959		gene;var:SFTA1P|
chr10:10249396-12586797_4	chr10:10841055:rs6602454:A:G	5.90261	0.433171	0.453593		gene;var:SFTA1P|
chr10:10249396-12586797_4	chr10:10840162:rs9329333:A:T	5.80468	0.422757	0.442649		gene;var:SFTA1P|
chr10:10249396-12586797_4	chr10:10846617:rs2031143:A:G	5.79542	0.402596	0.422435		gene;var:SFTA1P|
chr10:10249396-12586797_4	chr10:10859419:rs4749990:C:G	5.77242	0.400348	0.420982		gene;var:SFTA1P|
chr10:10249396-12586797_4	chr10:10846873:rs1475185:A:G	5.78	0.399538	0.419306		gene;var:SFTA1P|
chr10:10249396-12586797_4	chr10:10847865:rs7075064:A:G	5.77921	0.399387	0.419151		gene;var:SFTA1P|
chr10:10249396-12586797_4	chr10:10850258:rs7088716:A:G	5.76693	0.398137	0.417909		gene;var:SFTA1P|
chr10:10249396-12586797_4	chr10:10848955:rs7083737:T:G	5.76647	0.397079	0.416882		gene;var:SFTA1P|
chr10:10249396-12586797_4	chr10:10859187:rs7911696:A:G	5.74698	0.395562	0.416007		gene;var:SFTA1P|
chr10:10249396-12586797_4	chr10:10846404:rs2031142:T:C	5.76205	0.395726	0.415477		gene;var:SFTA1P|
chr10:10249396-12586797_4	chr10:10866579:rs7897651:A:G	5.71148	0.687667	0.414907	peak|	gene;var:SFTA1P|
chr10:10249396-12586797_4	chr10:10870241:rs7069558:T:C	5.69059	0.393271	0.414158		gene;var:SFTA1P|
chr10:10249396-12586797_4	chr10:10842639:rs2181444:A:G	5.69958	0.388053	0.407514		gene;var:SFTA1P|
chr10:10249396-12586797_4	chr10:10871297:rs6602457:T:G	5.674	0.386479	0.406602		gene;var:SFTA1P|
chr10:10249396-12586797_4	chr10:10859733:rs2399575:T:C	5.66065	0.382943	0.402869		gene;var:SFTA1P|
chr10:10249396-12586797_4	chr10:10868418:rs6602455:A:G	5.58672	0.377894	0.398018		gene;var:SFTA1P|
chr10:10249396-12586797_4	chr10:10844573:rs7913127:T:G	5.50899	0.375683	0.394758		gene;var:SFTA1P|
chr10:10249396-12586797_4	chr10:10871259:rs6602456:A:G	5.48844	0.369399	0.38901		gene;var:SFTA1P|
chr10:115328432-116421406_1	chr10:115546535:rs72837408:A:G	5.74152	0.476982	0.715367		gene;var:MIR4483|
chr10:115328432-116421406_1	chr10:115538498:rs7092758:A:G	5.62178	0.770621	0.576305	Promoter|	gene;var:MIR4483|
chr10:115328432-116421406_1	chr10:115538588:rs7092914:C:G	5.59859	0.768353	0.575102	Promoter|	gene;var:MIR4483|
chr10:115328432-116421406_1	chr10:115539310:rs7917250:A:C	5.59337	0.324619	0.571754		gene;var:MIR4483|
chr10:115328432-116421406_1	chr10:115540311:rs11196482:T:G	5.59565	0.594902	0.57083	peak|	gene;var:MIR4483|
chr10:115328432-116421406_1	chr10:115539670:rs7920700:T:C	5.59229	0.323555	0.570159		gene;var:MIR4483|
chr10:115328432-116421406_1	chr10:115540652:rs3750900:T:C	5.58762	0.754222	0.569242	3_UTR|	gene;var:MIR4483|
chr10:115328432-116421406_1	chr10:115539154:rs4918869:A:C	5.57994	0.321805	0.567764		gene;var:MIR4483|
chr10:115328432-116421406_1	chr10:115537960:rs2900990:T:C	5.55697	0.757981	0.563579	Promoter|	gene;var:MIR4483|
chr10:115328432-116421406_1	chr10:115535426:rs7899829:A:G	5.52849	0.315483	0.558877		gene;var:MIR4483|
chr10:115328432-116421406_1	chr10:115540411:rs11196483:T:C	5.50513	0.740699	0.555415	3_UTR|peak|	gene;var:MIR4483|
chr10:115328432-116421406_1	chr10:115539835:rs11196481:T:C	5.49976	0.312599	0.55467		gene;var:MIR4483|
chr10:58959528-60289987_1	chr10:60281530:rs57396248:T:G	6.43895	1	1		gene;var:BICC1|
chr10:58959528-60289987_2	chr10:60286159:rs2577393:T:C	9.21516	1	1		gene;var:BICC1|
chr10:60289987-61891409_1	chr10:60314729:rs2114564:T:C	9.26341	1	1		gene;var:BICC1|
chr10:60289987-61891409_9	chr10:60323021:rs1658441:C:G	7.42116	1	1		gene;var:BICC1|
chr10:60289987-61891409_1	chr10:60327734:rs1621227:C:G	9.21338	1	1		gene;var:BICC1|
chr10:60289987-61891409_3	chr10:60329183:rs2577392:A:G	7.34687	1	1		gene;var:BICC1|
chr10:60289987-61891409_1	chr10:60335090:rs6481407:T:C	-9.52162	0.781364	0.800395		gene;var:BICC1|
chr10:60289987-61891409_2	chr10:60396065:rs920259:A:G	6.0772	0.419779	0.420198		gene;var:FAM133CP|
chr10:60289987-61891409_2	chr10:60377347:rs6481410:A:G	5.98477	0.28762	0.288089		gene;var:FAM133CP|
chr10:60289987-61891409_2	chr10:60377348:rs6481411:A:C	5.96133	0.260396	0.260812		gene;var:FAM133CP|
chr10:60289987-61891409_1	chr10:60326910:rs1658436:A:G	9.62895	0.00901288	0.00929551		gene;var:BICC1|
chr10:60289987-61891409_1	chr10:60333847:rs10826200:T:C	-8.77169	0.00879013	0.00887676		gene;var:BICC1|
chr10:60289987-61891409_1	chr10:60321487:rs1649053:T:C	-8.66072	0.0074471	0.00745733		gene;var:BICC1|
chr10:60289987-61891409_1	chr10:60339098:rs4948523:A:C	9.55944	0.00715881	0.00737783		gene;var:BICC1|
chr10:60289987-61891409_1	chr10:60341934:rs10763558:T:G	9.54185	0.00649802	0.00669387		gene;var:BICC1|
chr10:60289987-61891409_1	chr10:60343638:rs11006192:T:C	9.51091	0.00570181	0.00586855		gene;var:BICC1|
chr10:60289987-61891409_1	chr10:60331627:rs1658423:T:G	9.49294	0.00563344	0.00581432		gene;var:BICC1|
chr10:60289987-61891409_1	chr10:60331547:rs1658425:C:G	9.46942	0.00547095	0.00564468		gene;var:BICC1|
chr10:60289987-61891409_1	chr10:60334002:rs1982173:T:G	-8.64206	0.00409414	0.00412455		gene;var:BICC1|
chr10:60289987-61891409_1	chr10:60333383:rs11006187:A:G	-8.64035	0.00912499	0.00408638	peak|	gene;var:BICC1|
chr10:60289987-61891409_1	chr10:60334939:rs10740730:T:C	-8.62033	0.00404746	0.00407442		gene;var:BICC1|
chr10:60289987-61891409_1	chr10:60292402:rs1658469:A:G	9.49567	0.00391399	0.00400506		gene;var:BICC1|
chr10:60289987-61891409_1	chr10:60335179:rs7912792:T:C	-8.63536	0.00394067	0.0039678		gene;var:BICC1|
chr10:60289987-61891409_1	chr10:60333471:rs11006188:C:G	-8.62861	0.00856192	0.00383332	peak|	gene;var:BICC1|
chr10:60289987-61891409_1	chr10:60335389:rs7912116:C:G	-8.61607	0.00354979	0.00357287		gene;var:BICC1|
chr10:60289987-61891409_1	chr10:60334575:rs4948522:T:C	-8.60539	0.0033571	0.00337956		gene;var:BICC1|
chr10:60289987-61891409_1	chr10:60351224:rs4948524:A:C	9.39231	0.00294869	0.00302216		gene;var:BICC1|
chr10:60289987-61891409_1	chr10:60360423:rs10763564:A:C	9.36674	0.00278421	0.00285207		gene;var:BICC1|
chr10:60289987-61891409_1	chr10:60352896:rs10763561:T:C	-8.53882	0.0026498	0.00265702		gene;var:BICC1|
chr10:60289987-61891409_1	chr10:60359091:rs10826202:T:C	9.35053	0.00255662	0.00261783		gene;var:BICC1|
chr10:60289987-61891409_1	chr10:60320446:rs1623568:T:C	9.40799	0.00226324	0.00231053		gene;var:BICC1|
chr10:60289987-61891409_1	chr10:60320664:rs1621811:T:C	9.40781	0.00226102	0.00230826		gene;var:BICC1|
chr10:60289987-61891409_1	chr10:60295342:rs1649074:T:G	9.40636	0.00224402	0.00229082		gene;var:BICC1|
chr10:60289987-61891409_1	chr10:60320045:rs1649055:A:T	9.40393	0.0022157	0.00226177		gene;var:BICC1|
chr10:60289987-61891409_1	chr10:60352888:rs10740732:A:G	9.33489	0.0021814	0.00223239		gene;var:BICC1|
chr10:60289987-61891409_1	chr10:60318897:rs1658442:A:G	9.3962	0.00212799	0.00217181		gene;var:BICC1|
chr10:60289987-61891409_1	chr10:60324282:rs1649048:A:G	9.39335	0.00209665	0.00213968		gene;var:BICC1|
chr10:60289987-61891409_1	chr10:60294379:rs1593672:T:C	9.38845	0.0020438	0.00208548		gene;var:BICC1|
chr10:60289987-61891409_1	chr10:60314275:rs1620186:A:G	9.37938	0.00194975	0.00198905		gene;var:BICC1|
chr10:60289987-61891409_1	chr10:60311527:rs1658451:A:T	9.37429	0.00189898	0.00193701		gene;var:BICC1|
chr10:60289987-61891409_1	chr10:60315643:rs1820542:T:C	9.35035	0.00992867	0.00165223	CRE|DAR|peak|	gene;var:BICC1|cre:BICC1|
chr10:60289987-61891409_1	chr10:60293320:rs1649078:A:C	-9.22635	0.00151399	0.00153875		gene;var:BICC1|
chr10:60289987-61891409_1	chr10:60374898:rs2393455:A:C	9.16327	0.00148562	0.00150712		gene;var:FAM133CP|
chr10:60289987-61891409_1	chr10:60310480:rs1649060:C:G	9.30287	0.00127283	0.00129569		gene;var:BICC1|
chr10:60289987-61891409_1	chr10:60365755:rs4245599:A:G	9.22337	0.00120452	0.00122829		gene;var:BICC1|
chr10:60289987-61891409_1	chr10:60304864:rs1649068:A:C	9.27346	0.00120171	0.0012223		gene;var:BICC1|
chr10:60289987-61891409_1	chr10:60331758:rs1658422:T:G	9.203	0.00117604	0.00120447		gene;var:BICC1|
chr10:60289987-61891409_1	chr10:60292434:rs1649082:A:C	9.26165	0.00115706	0.00117666		gene;var:BICC1|
chr10:60289987-61891409_1	chr10:60341398:rs10763556:A:G	9.21127	0.00114026	0.00116441		gene;var:BICC1|
chr10:60289987-61891409_1	chr10:60329125:rs3001717:A:G	9.18957	0.00109943	0.00112558		gene;var:BICC1|
chr10:60289987-61891409_1	chr10:60328209:rs1649043:T:C	9.18941	0.00109853	0.00112465		gene;var:BICC1|
chr10:60289987-61891409_1	chr10:60331928:rs1658421:A:T	9.18055	0.00105095	0.00107567		gene;var:BICC1|
chr10:60289987-61891409_1	chr10:60341515:rs10763557:T:C	9.18919	0.00102169	0.00104268		gene;var:BICC1|
chr10:60289987-61891409_1	chr10:60327830:rs1620404:A:G	9.17005	0.000997434	0.00102058		gene;var:BICC1|
chr10:60289987-61891409_1	chr10:60331504:rs1658427:A:G	9.14942	0.000985632	0.00100825		gene;var:BICC1|
chr10:60289987-61891409_1	chr10:60328756:rs1658434:C:G	9.14788	0.000971285	0.000993164		gene;var:BICC1|
chr10:60289987-61891409_1	chr10:60328088:rs1626606:T:C	9.16083	0.000952852	0.000974708		gene;var:BICC1|
chr10:60289987-61891409_1	chr10:60292444:rs1649081:A:G	9.22296	0.000954508	0.0009697		gene;var:BICC1|
chr10:60289987-61891409_1	chr10:60327527:rs1658435:A:G	9.20493	0.000921264	0.000939789		gene;var:BICC1|
chr10:60289987-61891409_1	chr10:60329069:rs1658432:C:G	9.15088	0.000907165	0.000927704		gene;var:BICC1|
chr10:60289987-61891409_1	chr10:60330917:rs1658428:T:C	9.1495	0.000900982	0.000921344		gene;var:BICC1|
chr10:60289987-61891409_1	chr10:60329230:rs2842083:A:C	9.14936	0.000900396	0.000920741		gene;var:BICC1|
chr10:60289987-61891409_1	chr10:60328782:rs1649041:T:C	9.14725	0.000891082	0.000911161		gene;var:BICC1|
chr10:60289987-61891409_1	chr10:60292383:rs1658470:A:G	9.22408	0.000894246	0.000908658		gene;var:BICC1|
chr10:60289987-61891409_1	chr10:60329525:rs1658431:T:C	9.14639	0.000887291	0.000907262		gene;var:BICC1|
chr10:60289987-61891409_1	chr10:60329617:rs1649040:T:C	9.14639	0.000887291	0.000907262		gene;var:BICC1|
chr10:60289987-61891409_1	chr10:60328663:rs1649042:T:C	9.14591	0.000885214	0.000905125		gene;var:BICC1|
chr10:60289987-61891409_1	chr10:60371606:rs10826205:A:G	-8.16033	0.000906028	0.000897826		gene;var:BICC1|
chr10:75422550-78706814_1	chr10:78282063:rs2637250:T:C	-5.46378	0.75419	0.75419		gene;var:KCNMA1|
chr10:75422550-78706814_1	chr10:78274818:rs2130800:T:C	5.45574	0.745777	0.745777		gene;var:KCNMA1|
chr10:93335047-95396368_1	chr10:94929116:rs10882167:T:C	6.90086	0.314536	1		gene;var:CYP26A1|
chr10:93335047-95396368_2	chr10:94936644:rs7078310:A:T	5.97857	0.133261	1		gene;var:CYP26A1|
chr10:95396368-96221243_2	chr10:96071561:rs2077218:A:G	5.90924	0.997591	0.998683		gene;var:PLCE1-AS1|
chr10:95396368-96221243_1	chr10:96023077:rs57866767:T:C	7.56886	0.440093	0.582141		gene;var:PLCE1|
chr10:95396368-96221243_1	chr10:96014622:rs10786156:C:G	7.52645	0.406572	0.53185		gene;var:PLCE1|
chr10:95396368-96221243_1	chr10:96039597:rs2274224:C:G	7.53371	0.866406	0.531405	Exon|	gene;var:PLCE1|
chr10:95396368-96221243_1	chr10:96015793:rs3891783:C:G	7.52796	0.401218	0.524764		gene;var:PLCE1|
chr11:101331121-103959636_1	chr11:102064834:rs7120067:A:C	5.6508	0.509793	0.706305		gene;var:YAP1|
chr11:101331121-103959636_1	chr11:102066240:rs12421242:T:G	5.64655	0.479181	0.679529		gene;var:YAP1|
chr11:101331121-103959636_1	chr11:102066226:rs12420287:T:G	5.60314	0.46453	0.664343		gene;var:YAP1|
chr11:101331121-103959636_1	chr11:102084940:rs10895277:A:G	5.55053	0.991695	0.656546	CRE|peak|	gene;var:YAP1|cre:YAP1|
chr11:101331121-103959636_1	chr11:102066955:rs12795624:T:C	5.48567	0.441109	0.642059		gene;var:YAP1|
chr11:101331121-103959636_1	chr11:102085782:rs7122907:T:G	5.49451	0.433431	0.638086		gene;var:YAP1|
chr11:101331121-103959636_1	chr11:102083069:rs10895274:A:C	5.45245	0.424262	0.629193		gene;var:YAP1|
chr11:114830666-116383348_1	chr11:115039683:rs10444329:A:G	5.5833	0.781505	0.781505	peak|	gene;var:CADM1|
chr11:114830666-116383348_1	chr11:115048420:rs4468381:T:C	5.53581	0.717669	0.717669	peak|	gene;var:CADM1|
chr11:119215476-120766806_4	chr11:120222211:rs12787285:T:C	6.99545	1	1		gene;var:ARHGEF12|
chr11:119215476-120766806_1	chr11:120218243:rs4539328:T:C	8.73808	1	1	peak|	gene;var:ARHGEF12|
chr11:119215476-120766806_6	chr11:120180657:rs717051:T:C	6.17597	0.925907	0.92957		gene;var:POU2F3|
chr11:119215476-120766806_2	chr11:120337712:rs80040504:A:G	8.78826	0.833257	0.833777		gene;var:GRIK4|
chr11:119215476-120766806_3	chr11:120275039:rs76181827:C:G	5.8309	0.172611	0.350394		gene;var:ARHGEF12|
chr11:119215476-120766806_3	chr11:120357341:rs79425731:A:G	5.83991	0.55665	0.327933	3_UTR|	gene;var:GRIK4|
chr11:119215476-120766806_1	chr11:120198093:rs1893261:A:G	9.1793	0.215411	0.198138	Exon|peak|	gene;var:TLCD5|
chr11:119215476-120766806_1	chr11:120203628:rs12806740:A:G	9.13458	0.183339	0.168535	3_UTR|	gene;var:ARHGEF12|
chr11:119215476-120766806_2	chr11:120311157:rs77216358:A:G	8.66021	0.166743	0.166223		gene;var:ARHGEF12|
chr11:119215476-120766806_1	chr11:120196433:rs36011588:C:G	9.14586	0.178489	0.160145	Promoter|	gene;var:TLCD5|
chr11:119215476-120766806_1	chr11:120203559:rs34298380:A:G	9.12566	0.166204	0.152863	3_UTR|	gene;var:ARHGEF12|
chr11:119215476-120766806_3	chr11:120347586:rs76034797:T:C	5.82915	0.0621285	0.125267		gene;var:GRIK4|
chr11:119215476-120766806_3	chr11:120305873:rs77657279:A:G	5.71439	0.0512957	0.103626		gene;var:ARHGEF12|
chr11:119215476-120766806_1	chr11:120202099:rs11217821:T:C	9.10565	0.111926	0.103239	3_UTR|peak|	gene;var:ARHGEF12|
chr11:119215476-120766806_3	chr11:120356832:rs79820276:A:G	5.70375	0.157315	0.0927805	3_UTR|	gene;var:GRIK4|
chr11:119215476-120766806_1	chr11:120207405:rs7126413:A:G	9.03263	0.0574016	0.0516704	Promoter|peak|	gene;var:ARHGEF12|
chr11:119215476-120766806_1	chr11:120199924:rs61898351:T:C	9.02759	0.0129746	0.0412246		gene;var:TLCD5|
chr11:119215476-120766806_6	chr11:120180479:rs717052:A:G	6.43633	0.0346805	0.0342969		gene;var:POU2F3|
chr11:119215476-120766806_1	chr11:120216906:rs12417581:A:T	8.81094	0.012136	0.0170435	peak|	gene;var:ARHGEF12|
chr11:119215476-120766806_1	chr11:120211212:rs7932658:A:G	8.83411	0.00964432	0.0135829	peak|	gene;var:ARHGEF12|
chr11:119215476-120766806_1	chr11:120220268:rs10790378:T:C	8.73685	0.00888626	0.0124003	peak|	gene;var:ARHGEF12|
chr11:119215476-120766806_1	chr11:120208257:rs4938799:T:G	8.8066	0.0124698	0.0112652	Promoter|peak|	gene;var:ARHGEF12|
chr11:119215476-120766806_1	chr11:120223399:rs4938801:T:C	8.72512	0.00342998	0.0108222		gene;var:ARHGEF12|
chr11:128188537-130342575_1	chr11:128380742:rs7924522:A:C	-7.64247	0.755292	0.770705		gene;var:ETS1|
chr11:128188537-130342575_4	chr11:130287469:rs4936100:A:G	-6.07589	0.385007	0.504664		gene;var:ADAMTS8|
chr11:128188537-130342575_2	chr11:130273230:rs11222084:A:T	-5.5966	0.563681	0.472195	peak|	gene;var:ADAMTS8|
chr11:128188537-130342575_4	chr11:130289608:rs765386:T:C	-5.98424	0.356557	0.466272		gene;var:ADAMTS8|
chr11:128188537-130342575_3	chr11:128490382:rs12791015:A:G	5.74587	0.387421	0.41222		gene;var:ETS1|
chr11:128188537-130342575_2	chr11:130266117:rs10894192:A:T	-5.75604	0.26257	0.375004		gene;var:ADAMTS8|
chr11:128188537-130342575_3	chr11:128492549:rs7127911:T:G	6.12219	0.281181	0.3682		gene;var:ETS1|
chr11:128188537-130342575_3	chr11:128486751:rs7125157:A:G	5.68752	0.301661	0.345964		gene;var:ETS1|
chr11:128188537-130342575_1	chr11:128381867:rs7108992:A:C	-7.44886	0.301553	0.343502		gene;var:ETS1|
chr11:128188537-130342575_4	chr11:130284344:rs7106106:T:C	-5.80809	0.512867	0.340031	peak|	gene;var:ADAMTS8|
chr11:128188537-130342575_2	chr11:130280725:rs4936099:A:C	-6.02606	0.209692	0.311149		gene;var:ADAMTS8|
chr11:128188537-130342575_3	chr11:128487069:rs7121743:T:C	5.58507	0.24759	0.298969		gene;var:ETS1|
chr11:128188537-130342575_3	chr11:128495100:rs12272896:T:C	5.47025	0.233388	0.284437		gene;var:ETS1|
chr11:128188537-130342575_3	chr11:128488793:rs12802052:T:C	5.57743	0.220086	0.275544		gene;var:ETS1|
chr11:128188537-130342575_3	chr11:128487469:rs60674472:A:G	5.48993	0.213377	0.267502		gene;var:ETS1|
chr11:128188537-130342575_1	chr11:128387422:rs7946009:T:C	-7.34018	0.218676	0.266257		gene;var:ETS1|
chr11:128188537-130342575_2	chr11:130278210:rs3740888:T:C	-6.04447	0.735713	0.260733	CRE|peak|	gene;var:ADAMTS8|cre:ADAMTS15|cre:ADAMTS8|
chr11:128188537-130342575_3	chr11:128495106:rs7932045:T:C	5.79244	0.185358	0.252808		gene;var:ETS1|
chr11:128188537-130342575_4	chr11:130284183:rs7120276:T:C	-5.78295	0.37496	0.247856	peak|	gene;var:ADAMTS8|
chr11:128188537-130342575_2	chr11:130268147:rs4937515:C:G	-5.79567	0.174255	0.247402		gene;var:ADAMTS8|
chr11:128188537-130342575_2	chr11:130280667:rs4936098:A:G	-5.91834	0.164305	0.225533		gene;var:ADAMTS8|
chr11:128188537-130342575_2	chr11:130276427:rs6590455:T:C	-5.96054	0.161528	0.222392		gene;var:ADAMTS8|
chr11:128188537-130342575_2	chr11:130282078:rs2875238:T:C	-6.21851	0.470316	0.22073	Promoter|	gene;var:ADAMTS8|
chr11:128188537-130342575_2	chr11:130271647:rs747249:A:G	-5.79223	0.159044	0.216344		gene;var:ADAMTS8|
chr11:15742552-17578402_2	chr11:17011176:rs4141194:A:C	6.58549	0.896067	0.715315	CRE|DAR|peak|	gene;var:PLEKHA7|cre:RPS13|cre:PLEKHA7|	11:17011176:A:C:PLEKHA7|11:17011176:A:C:PLEKHA7|
chr11:15742552-17578402_2	chr11:17008605:rs11024102:T:C	6.57337	0.891287	0.707204	CRE|peak|	gene;var:PLEKHA7|cre:PLEKHA7|	11:17008605:T:C:PLEKHA7|11:17008605:T:C:PLEKHA7|
chr11:15742552-17578402_2	chr11:17014882:rs10766368:C:G	6.4723	0.489274	0.657126	peak|	gene;var:PLEKHA7|	11:17014882:C:G:PLEKHA7|
chr11:15742552-17578402_2	chr11:17019317:rs12575487:T:C	6.43325	0.481656	0.645725	peak|	gene;var:PLEKHA7|	11:17019317:T:C:PLEKHA7|
chr11:15742552-17578402_2	chr11:17005544:rs11024101:T:C	6.38509	0.475448	0.636279	peak|	gene;var:PLEKHA7|	11:17005544:T:C:PLEKHA7|
chr11:15742552-17578402_2	chr11:17004090:rs7127818:C:G	6.37472	0.850003	0.634604	CRE|DAR|peak|	gene;var:PLEKHA7|cre:PLEKHA7|	11:17004090:C:G:PLEKHA7|11:17004090:C:G:PLEKHA7|
chr11:15742552-17578402_2	chr11:17002985:rs7123383:A:G	6.34085	0.241711	0.629867		gene;var:PLEKHA7|
chr11:15742552-17578402_2	chr11:17001427:rs34927905:T:C	6.2978	0.239209	0.624503		gene;var:PLEKHA7|
chr11:44693799-47006137_1	chr11:46969281:rs17790204:C:G	5.6508	0.730056	0.607056	peak|	gene;var:C11orf49|
chr11:44693799-47006137_1	chr11:46981646:rs6485716:A:G	5.6993	0.427078	0.602138		gene;var:C11orf49|
chr11:44693799-47006137_1	chr11:46949601:rs78744550:T:C	5.67351	0.421154	0.595373		gene;var:C11orf49|
chr11:44693799-47006137_1	chr11:46923168:rs11039024:T:C	5.70187	0.97645	0.587148	CRE|DAR|peak|	gene;var:LRP4|cre:C11orf49|	11:46923168:T:C:LRP4|
chr11:44693799-47006137_1	chr11:46911781:rs2306037:C:G	5.69441	0.407901	0.585699		gene;var:LRP4|
chr11:44693799-47006137_1	chr11:46905838:rs11039017:A:G	5.62763	0.414252	0.584981		gene;var:LRP4|
chr11:44693799-47006137_1	chr11:46730639:rs11602537:C:G	5.48874	0.412234	0.581328		gene;var:ZNF408|
chr11:44693799-47006137_1	chr11:46967415:rs11039035:T:G	5.60069	0.40869	0.581207		gene;var:C11orf49|
chr11:44693799-47006137_1	chr11:46893769:rs58389391:T:C	5.5498	0.402395	0.571047		gene;var:LRP4|
chr11:44693799-47006137_1	chr11:46915562:rs2867219:T:C	5.46393	0.39326	0.566415		gene;var:LRP4|
chr11:44693799-47006137_1	chr11:46906706:rs10838628:A:T	5.47005	0.396439	0.564363		gene;var:LRP4|
chr11:44693799-47006137_1	chr11:46931941:rs11606992:A:T	5.46057	0.663271	0.542942	peak|	gene;var:LRP4|	11:46931941:A:T:LRP4|
chr11:47006137-49866050_1	chr11:47469439:rs7111873:A:G	7.54972	0.445721	0.288818	Exon|	gene;var:RAPSN|
chr11:47006137-49866050_1	chr11:47468791:rs3740685:T:C	7.33471	0.049809	0.10178		gene;var:RAPSN|
chr11:47006137-49866050_1	chr11:47465955:rs4752837:A:G	7.2754	0.0420778	0.0862834		gene;var:RAPSN|
chr11:47006137-49866050_1	chr11:47468820:rs3740684:T:C	7.23885	0.0389608	0.0796686		gene;var:RAPSN|
chr11:47006137-49866050_1	chr11:47460306:rs7126210:A:G	7.20884	0.126844	0.0786458	Exon|	gene;var:RAPSN|
chr11:47006137-49866050_1	chr11:47465095:rs4752836:T:C	7.24432	0.0384641	0.0782673		gene;var:RAPSN|
chr11:47006137-49866050_1	chr11:47462115:rs7104366:A:G	7.20539	0.0356129	0.072137		gene;var:RAPSN|
chr11:47006137-49866050_1	chr11:47460098:rs10769267:T:C	7.20438	0.117764	0.0719296	3_UTR|	gene;var:RAPSN|
chr11:47006137-49866050_1	chr11:47461480:rs7119556:T:C	7.20151	0.0780263	0.0713459	peak|	gene;var:RAPSN|
chr11:47006137-49866050_1	chr11:47468569:rs3824867:A:G	7.20874	0.0354851	0.0709856		gene;var:RAPSN|
chr11:47006137-49866050_1	chr11:47454701:rs10742805:A:G	7.19665	0.0348351	0.0703766		gene;var:PSMC3|
chr11:47006137-49866050_1	chr11:47460005:rs12282783:T:C	7.19586	0.0347662	0.0702206		gene;var:RAPSN|
chr11:47006137-49866050_1	chr11:47457789:rs7117277:A:G	7.18795	0.0340966	0.0687012		gene;var:PSMC3|
chr11:47006137-49866050_1	chr11:47456202:rs4282946:A:G	7.18534	0.194216	0.0682125	CRE|DAR|peak|	gene;var:PSMC3|cre:PACSIN3|	11:47456202:A:G:PSMC3|
chr11:47006137-49866050_1	chr11:47456226:rs10742806:A:T	7.18534	0.194216	0.0682125	CRE|DAR|peak|	gene;var:PSMC3|cre:PACSIN3|	11:47456226:A:T:PSMC3|
chr11:47006137-49866050_1	chr11:47454271:rs4237544:A:C	7.18164	0.0335822	0.0675316		gene;var:PSMC3|
chr11:47006137-49866050_1	chr11:47396654:rs4752829:A:G	7.00896	0.0254496	0.0488621		gene;var:SPI1|
chr11:47006137-49866050_1	chr11:47468545:rs12419342:T:C	6.91911	0.0243487	0.0466442		gene;var:RAPSN|
chr1:162346721-165191702_1	chr1:162679145:rs4542196:A:G	6.01454	0.467626	0.655249		gene;var:DDR2|
chr1:162346721-165191702_1	chr1:162665075:rs10737486:A:G	5.46899	0.451562	0.621202		gene;var:DDR2|
chr1:162346721-165191702_1	chr1:162673946:rs11805556:A:G	5.89752	0.389651	0.576599		gene;var:DDR2|
chr1:162346721-165191702_1	chr1:162676698:rs6689396:T:C	5.76227	0.957293	0.542579	CRE|DAR|peak|	gene;var:DDR2|cre:HSD17B7|
chr1:162346721-165191702_1	chr1:162668008:rs4411113:T:G	5.75157	0.825341	0.533352	DAR|peak|	gene;var:DDR2|
chr1:162346721-165191702_1	chr1:162667331:rs10737487:A:G	5.74024	0.640786	0.531125	peak|	gene;var:DDR2|
chr1:162346721-165191702_1	chr1:162669006:rs10753585:T:C	5.73891	0.357187	0.530866		gene;var:DDR2|
chr1:162346721-165191702_1	chr1:162644411:rs10799862:T:C	5.55545	0.366368	0.53011		gene;var:DDR2|
chr1:162346721-165191702_1	chr1:162645571:rs4233392:T:C	5.54665	0.364828	0.528421		gene;var:DDR2|
chr1:162346721-165191702_1	chr1:162670541:rs4477251:A:G	5.70001	0.354955	0.527429		gene;var:DDR2|
chr1:162346721-165191702_1	chr1:162644317:rs4657222:C:G	5.51778	0.360001	0.523125		gene;var:DDR2|
chr1:162346721-165191702_1	chr1:162644912:rs6691289:A:G	5.50097	0.357344	0.52021		gene;var:DDR2|
chr1:162346721-165191702_1	chr1:162651672:rs11577330:A:T	5.53311	0.353222	0.517283		gene;var:DDR2|
chr11:63804569-65898631_1	chr11:65225717:rs12785585:T:G	-7.1334	0.290432	0.570359	peak|	gene;var:NEAT1|	11:65225717:T:G:NEAT1|
chr11:63804569-65898631_1	chr11:65337251:rs1346:A:T	-7.22403	0.40955	0.283599	Promoter|peak|	gene;var:ZNRD2-AS1|
chr11:63804569-65898631_1	chr11:65326154:rs12789028:A:G	-6.98454	0.317932	0.189011	Promoter|	gene;var:LTBP3|
chr11:63804569-65898631_1	chr11:65227632:rs7935551:A:G	-6.81928	0.0906067	0.183915		gene;var:NEAT1|
chr11:63804569-65898631_1	chr11:65232345:rs12788055:T:C	-6.75968	0.0823467	0.170402		gene;var:MALAT1|
chr11:63804569-65898631_1	chr11:65224560:rs34512931:A:G	-6.69143	0.174762	0.149468	peak|	gene;var:NEAT1|	11:65224560:A:G:NEAT1|
chr11:63804569-65898631_1	chr11:65257527:rs11227206:C:G	-6.72491	0.390519	0.148946	CRE|peak|	gene;var:MALAT1|cre:LTBP3|cre:NEAT1|cre:SCYL1|	11:65257527:C:G:NEAT1|
chr11:63804569-65898631_1	chr11:65314830:rs58621819:A:T	-6.54744	0.253404	0.146984	Promoter|peak|	gene;var:LTBP3|
chr11:63804569-65898631_1	chr11:65228278:rs12364730:T:C	-6.6327	0.0759798	0.141449		gene;var:MALAT1|
chr11:63804569-65898631_1	chr11:65225319:rs12808303:C:G	-6.62545	0.0755139	0.140629		gene;var:NEAT1|
chr11:63804569-65898631_1	chr11:65227700:rs35292734:T:C	-6.62421	0.162487	0.140493	peak|	gene;var:NEAT1|	11:65227700:T:C:NEAT1|
chr11:63804569-65898631_1	chr11:65263895:rs4102217:C:G	-6.70022	0.373517	0.139652	CRE|peak|	gene;var:MALAT1|cre:NEAT1|	11:65263895:C:G:NEAT1|
chr11:63804569-65898631_1	chr11:65245829:rs10896007:A:T	-6.4517	0.174594	0.137749	peak|	gene;var:MALAT1|
chr11:63804569-65898631_1	chr11:65229828:rs2508710:T:G	-6.56268	0.0742332	0.13757		gene;var:MALAT1|
chr11:63804569-65898631_1	chr11:65220206:rs34582634:A:G	-6.58981	0.158131	0.137168	peak|	gene;var:NEAT1|	11:65220206:A:G:NEAT1|
chr11:63804569-65898631_1	chr11:65217626:rs57311037:A:T	-6.55605	0.163611	0.134447	peak|	gene;var:NEAT1|	11:65217626:A:T:NEAT1|
chr11:63804569-65898631_1	chr11:65226551:rs10896005:A:T	-6.54762	0.070927	0.134134		gene;var:NEAT1|
chr11:63804569-65898631_1	chr11:65226479:rs10896004:A:G	-6.44619	0.0668121	0.129745		gene;var:NEAT1|
chr11:63804569-65898631_1	chr11:65256164:rs11227205:A:G	-6.39485	0.330089	0.127637	CRE|DAR|peak|	gene;var:MALAT1|cre:LTBP3|cre:NEAT1|	11:65256164:A:G:NEAT1|
chr11:63804569-65898631_1	chr11:65242315:rs11227200:C:G	-6.34606	0.130826	0.12694	peak|	gene;var:MALAT1|
chr11:63804569-65898631_1	chr11:65232087:rs12269965:T:C	-6.33924	0.0599912	0.126884		gene;var:MALAT1|
chr11:63804569-65898631_1	chr11:65232166:rs35469818:A:G	-6.32326	0.0595263	0.126797		gene;var:MALAT1|
chr11:63804569-65898631_1	chr11:65234922:rs11227196:A:G	-6.30793	0.0590981	0.12677		gene;var:MALAT1|
chr1:165191702-166460517_1	chr1:165737704:rs2790053:C:G	21.2634	1	1	Promoter|	gene;var:TMCO1|
chr1:165191702-166460517_2	chr1:165699408:rs113635272:A:C	16.7213	0.936361	0.968036		gene;var:LOC440700|
chr1:165191702-166460517_2	chr1:165699410:rs71519271:A:C	16.7213	0.936361	0.968036		gene;var:LOC440700|
chr1:170557776-173097907_1	chr1:171500221:rs183469250:A:G	12.9958	1	1		gene;var:PRRC2C|
chr1:170557776-173097907_3	chr1:172447077:rs141560510:A:G	5.90704	0.995816	0.996916		gene;var:PIGC|
chr1:170557776-173097907_2	chr1:171822625:rs55702618:A:T	5.74308	0.921715	0.761538	peak|	gene;var:DNM3|
chr1:170557776-173097907_2	chr1:171894757:rs114780788:T:G	5.68818	0.506323	0.654064		gene;var:DNM3|
chr11:84381272-86619301_3	chr11:86363569:rs2510498:T:G	5.57397	1	1		gene;var:ME3|
chr11:84381272-86619301_1	chr11:86368106:rs10792871:T:C	8.07979	1	1		gene;var:ME3|
chr11:84381272-86619301_2	chr11:86490580:rs12786875:A:G	6.39735	0.280728	0.282957		gene;var:PRSS23|
chr11:84381272-86619301_2	chr11:86490519:rs12787853:T:C	6.41118	0.20585	0.207482		gene;var:PRSS23|
chr11:84381272-86619301_2	chr11:86486121:rs11234806:A:C	6.40027	0.177506	0.178912		gene;var:PRSS23|
chr11:84381272-86619301_2	chr11:86510182:rs2105587:A:C	6.24749	0.0419231	0.0422545		gene;var:PRSS23|
chr11:84381272-86619301_2	chr11:86505072:rs2000538:C:G	6.17749	0.026537	0.0267467		gene;var:PRSS23|
chr11:84381272-86619301_2	chr11:86502292:rs750789:T:C	6.18112	0.0236587	0.0238456		gene;var:PRSS23|
chr11:84381272-86619301_2	chr11:86503107:rs754490:A:G	6.14826	0.0219558	0.0221293		gene;var:PRSS23|
chr11:84381272-86619301_2	chr11:86504356:rs12799567:A:G	6.13902	0.0206841	0.0208476		gene;var:PRSS23|
chr11:84381272-86619301_2	chr11:86505012:rs2000537:C:G	6.15304	0.0197316	0.0198874		gene;var:PRSS23|
chr11:84381272-86619301_2	chr11:86500201:rs11606902:T:C	6.10438	0.0144319	0.0145459		gene;var:PRSS23|
chr11:84381272-86619301_2	chr11:86510340:rs872619:T:G	6.08011	0.0141621	0.014274		gene;var:PRSS23|
chr11:84381272-86619301_2	chr11:86509031:rs1939118:T:C	6.06604	0.0129441	0.0130463		gene;var:PRSS23|
chr11:84381272-86619301_2	chr11:86506987:rs2186617:A:T	6.05468	0.0120386	0.0121337		gene;var:PRSS23|
chr11:84381272-86619301_2	chr11:86485689:rs10898535:T:C	5.99198	0.00971252	0.00978932		gene;var:PRSS23|
chr11:84381272-86619301_2	chr11:86502853:rs12788554:T:C	6.01562	0.00939236	0.00946657		gene;var:PRSS23|
chr11:84381272-86619301_2	chr11:86484642:rs12793595:A:G	5.98061	0.00903758	0.00910905		gene;var:PRSS23|
chr11:84381272-86619301_2	chr11:86480072:rs67313042:A:G	6.05263	0.00717182	0.00722835		gene;var:PRSS23|
chr11:84381272-86619301_2	chr11:86508928:rs12805405:T:C	5.96976	0.00703154	0.00708709		gene;var:PRSS23|
chr11:84381272-86619301_2	chr11:86483432:rs12362094:T:G	5.91258	0.00588879	0.00593534		gene;var:PRSS23|
chr11:84381272-86619301_2	chr11:86480916:rs67588995:T:C	5.99531	0.00500818	0.00504766		gene;var:PRSS23|
chr11:84381272-86619301_2	chr11:86479027:rs11234799:T:C	5.97663	0.0048409	0.00487907		gene;var:PRSS23|
chr11:84381272-86619301_2	chr11:86479407:rs11234800:C:G	5.98597	0.00478571	0.00482343		gene;var:PRSS23|
chr11:84381272-86619301_2	chr11:86500316:rs11602721:A:C	5.92706	0.00471037	0.00474756		gene;var:PRSS23|
chr11:84381272-86619301_2	chr11:86485390:rs7128805:C:G	5.98432	0.00467671	0.00471357		gene;var:PRSS23|
chr12:106958748-109025901_1	chr12:107284460:rs4964494:A:G	-5.71392	0.709431	0.709431		gene;var:TMEM263|
chr12:106958748-109025901_1	chr12:107077172:rs1922433:A:G	-5.66585	0.670808	0.670808		gene;var:RFX4|
chr12:106958748-109025901_1	chr12:107285751:rs989560:T:C	-5.61807	0.666484	0.666484		gene;var:TMEM263|
chr12:106958748-109025901_1	chr12:107219308:rs1037013:A:G	-5.73388	0.665639	0.665639		gene;var:RIC8B|
chr12:106958748-109025901_1	chr12:107107334:rs7959062:T:G	-5.53768	0.639139	0.639139		gene;var:LOC100505978|
chr12:106958748-109025901_1	chr12:107259470:rs7977247:T:C	-5.59932	0.63485	0.63485		gene;var:RIC8B|
chr12:106958748-109025901_1	chr12:107071130:rs10861645:T:C	-5.51154	0.633503	0.633503		gene;var:RFX4|
chr12:106958748-109025901_1	chr12:107074410:rs10778500:A:T	-5.50845	0.632855	0.632855		gene;var:RFX4|
chr12:106958748-109025901_1	chr12:107211325:rs11113122:T:C	-5.58125	0.629823	0.629823		gene;var:RIC8B|
chr12:106958748-109025901_1	chr12:107083031:rs9804754:A:G	-5.4526	0.621825	0.621825		gene;var:LOC100505978|
chr12:110336719-113263518_6	chr12:111932800:rs7137828:T:C	-6.28286	0.969932	0.996527		gene;var:ATXN2|
chr12:110336719-113263518_6	chr12:111904371:rs4766578:A:T	-5.52936	0.699168	0.747692		gene;var:ATXN2|
chr12:110336719-113263518_6	chr12:112007756:rs653178:T:C	-5.9371	0.626973	0.719772		gene;var:ATXN2|
chr12:110336719-113263518_6	chr12:111973358:rs597808:A:G	-5.83211	0.631392	0.710291		gene;var:ATXN2|
chr12:110336719-113263518_6	chr12:111865049:rs7310615:C:G	-5.97756	0.603395	0.709623		gene;var:SH2B3|
chr12:110336719-113263518_6	chr12:111884608:rs3184504:T:C	-6.12893	0.893938	0.528457	Exon|	gene;var:SH2B3|	12:111884608:T:C:SH2B3|
chr12:110336719-113263518_6	chr12:111910219:rs10774625:A:G	-5.73983	0.389206	0.433903		gene;var:ATXN2|
chr12:110336719-113263518_6	chr12:111833788:rs10774624:A:G	-5.79601	0.269132	0.292415		gene;var:SH2B3|
chr1:218705513-219590571_6	chr1:219156010:rs11118187:A:G	-5.45356	0.66802	0.633431		gene;var:LYPLAL1-DT|
chr1:218705513-219590571_6	chr1:219127037:rs715685:C:G	-6.38518	0.283058	0.362405		gene;var:LYPLAL1-DT|
chr1:218705513-219590571_2	chr1:219486989:rs10863446:A:G	-5.95242	0.321647	0.330528		gene;var:LYPLAL1|
chr1:218705513-219590571_6	chr1:219106404:rs10779334:A:G	-6.08609	0.308038	0.319375		gene;var:LYPLAL1-DT|
chr1:218705513-219590571_6	chr1:219126770:rs3885898:T:C	-6.3625	0.491516	0.311661	peak|	gene;var:LYPLAL1-DT|
chr1:218705513-219590571_6	chr1:219127338:rs6691014:T:C	-6.3605	0.48659	0.307735	peak|	gene;var:LYPLAL1-DT|
chr1:218705513-219590571_6	chr1:219159834:rs6697647:A:G	-6.45461	0.238949	0.293442		gene;var:LYPLAL1-DT|
chr1:218705513-219590571_2	chr1:219497096:rs11118275:T:C	-5.88703	0.259443	0.270717		gene;var:LYPLAL1|
chr1:218705513-219590571_2	chr1:219494339:rs8179452:A:G	-5.88337	0.25642	0.267801		gene;var:LYPLAL1|
chr1:218705513-219590571_6	chr1:219111028:rs73103335:A:C	-6.38199	0.218898	0.261701		gene;var:LYPLAL1-DT|
chr1:218705513-219590571_6	chr1:219160601:rs6693640:A:C	-5.53969	0.24921	0.257028		gene;var:LYPLAL1-DT|
chr1:218705513-219590571_6	chr1:219110621:rs631060:T:C	-5.89819	0.228406	0.242312		gene;var:LYPLAL1-DT|
chr1:218705513-219590571_6	chr1:219182657:rs1700871:T:C	-5.68307	0.213597	0.218546		gene;var:LYPLAL1-DT|
chr1:218705513-219590571_6	chr1:219122116:rs619228:T:C	-5.84667	0.201398	0.216931		gene;var:LYPLAL1-DT|
chr1:218705513-219590571_6	chr1:219182679:rs1700872:T:C	-5.6641	0.206489	0.212066		gene;var:LYPLAL1-DT|
chr1:218705513-219590571_6	chr1:219203397:rs12087006:T:C	-6.46747	0.18011	0.206485		gene;var:LYPLAL1-DT|
chr1:218705513-219590571_6	chr1:219182808:rs1764871:A:C	-5.7742	0.201118	0.201556		gene;var:LYPLAL1-DT|
chr1:218705513-219590571_6	chr1:219106316:rs7540811:A:C	-5.48975	0.174317	0.189605		gene;var:LYPLAL1-DT|
chr1:218705513-219590571_6	chr1:219134267:rs586038:T:C	-5.74808	0.170744	0.186859		gene;var:LYPLAL1-DT|
chr1:218705513-219590571_6	chr1:219134231:rs622796:T:C	-5.74462	0.169777	0.185905		gene;var:LYPLAL1-DT|
chr1:218705513-219590571_6	chr1:219215137:rs6667536:A:G	-6.54083	0.166248	0.183382		gene;var:LYPLAL1-DT|
chr1:218705513-219590571_6	chr1:219128928:rs608082:A:G	-5.72887	0.165475	0.181654		gene;var:LYPLAL1-DT|
chr1:218705513-219590571_6	chr1:219107206:rs642053:T:C	-5.64188	0.173287	0.180691		gene;var:LYPLAL1-DT|
chr1:218705513-219590571_6	chr1:219127046:rs589217:A:G	-5.65638	0.172898	0.179642		gene;var:LYPLAL1-DT|
chr1:218705513-219590571_6	chr1:219182858:rs1700874:A:G	-5.70173	0.171075	0.178418		gene;var:LYPLAL1-DT|
chr1:218705513-219590571_6	chr1:219106550:rs10746381:A:G	-5.51095	0.161443	0.175811		gene;var:LYPLAL1-DT|
chr1:218705513-219590571_6	chr1:219167752:rs6702023:C:G	-5.51964	0.157847	0.171817		gene;var:LYPLAL1-DT|
chr1:218705513-219590571_6	chr1:219181936:rs1700870:T:C	-5.67	0.162959	0.171289		gene;var:LYPLAL1-DT|
chr1:218705513-219590571_6	chr1:219175366:rs11118195:T:C	-5.64046	0.156684	0.165943		gene;var:LYPLAL1-DT|
chr1:218705513-219590571_6	chr1:219122393:rs618205:A:T	-5.63281	0.1553	0.164806		gene;var:LYPLAL1-DT|
chr1:218705513-219590571_6	chr1:219169426:rs6696616:T:G	-5.62454	0.153932	0.16371		gene;var:LYPLAL1-DT|
chr1:218705513-219590571_6	chr1:219173488:rs28438493:A:T	-5.61488	0.152519	0.162624		gene;var:LYPLAL1-DT|
chr1:218705513-219590571_6	chr1:219174033:rs12061363:A:G	-5.60446	0.15125	0.161717		gene;var:LYPLAL1-DT|
chr1:218705513-219590571_6	chr1:219150103:rs639036:A:G	-5.62205	0.14443	0.160242		gene;var:LYPLAL1-DT|
chr1:218705513-219590571_6	chr1:219222850:rs73111535:A:C	-6.45914	0.295088	0.157452	peak|	gene;var:LYPLAL1-DT|
chr1:218705513-219590571_2	chr1:219477443:rs6671444:T:C	-5.85413	0.138445	0.15642		gene;var:LYPLAL1|
chr1:218705513-219590571_2	chr1:219482376:rs6685647:A:G	-5.85327	0.138135	0.156105		gene;var:LYPLAL1|
chr1:218705513-219590571_6	chr1:219111758:rs676386:C:G	-5.49303	0.137952	0.152031		gene;var:LYPLAL1-DT|
chr1:218705513-219590571_6	chr1:219113227:rs659478:A:G	-5.53975	0.135071	0.145052		gene;var:LYPLAL1-DT|
chr1:218705513-219590571_6	chr1:219112335:rs659302:A:T	-5.46287	0.123699	0.136445		gene;var:LYPLAL1-DT|
chr1:218705513-219590571_2	chr1:219468225:rs1938586:A:T	-5.78154	0.117816	0.135631		gene;var:LYPLAL1|
chr1:218705513-219590571_6	chr1:219182998:rs75995975:T:C	-6.12049	0.0902103	0.103315		gene;var:LYPLAL1-DT|
chr1:218705513-219590571_6	chr1:219153142:rs10495119:T:C	-6.02048	0.082714	0.0957168		gene;var:LYPLAL1-DT|
chr12:83502666-84303844_1	chr12:84065780:rs7961422:T:G	-5.45245	1	1		gene;var:TMTC2|
chr12:83502666-84303844_2	chr12:84079909:rs7968147:T:G	-7.70602	1	1		gene;var:TMTC2|
chr13:22242174-23594702_3	chr13:22673870:rs4769194:A:G	8.00061	0.633174	0.642366		gene;var:LINC00424|
chr13:22242174-23594702_3	chr13:22679011:rs6490697:T:G	7.98198	0.549908	0.558543		gene;var:LINC00424|
chr13:22242174-23594702_3	chr13:22661290:rs1570455:T:C	5.76932	0.351256	0.368336		gene;var:LINC00424|
chr13:22242174-23594702_3	chr13:22664108:rs2320805:C:G	6.65873	0.282836	0.300126		gene;var:LINC00424|
chr13:22242174-23594702_3	chr13:22682423:rs4769196:A:G	7.68677	0.26237	0.277433		gene;var:LINC00424|
chr13:22242174-23594702_3	chr13:22665145:rs9552592:C:G	6.51252	0.256575	0.273767		gene;var:LINC00424|
chr13:22242174-23594702_3	chr13:22669707:rs7332465:A:G	6.35792	0.250156	0.26708		gene;var:LINC00424|
chr13:22242174-23594702_3	chr13:22666400:rs17075835:A:G	6.60519	0.249669	0.266499		gene;var:LINC00424|
chr13:22242174-23594702_3	chr13:22669833:rs17075864:A:T	6.90487	0.249275	0.266189		gene;var:LINC00424|
chr13:22242174-23594702_3	chr13:22666786:rs61056805:T:G	5.90652	0.237481	0.254406		gene;var:LINC00424|
chr13:22242174-23594702_3	chr13:22655235:rs1077674:T:C	6.27515	0.23639	0.251968		gene;var:LINC00424|
chr13:22242174-23594702_3	chr13:22660658:rs4770242:A:G	6.98577	0.235328	0.251452		gene;var:LINC00424|
chr13:22242174-23594702_3	chr13:22667582:rs17075847:A:G	7.03624	0.235174	0.251284		gene;var:LINC00424|
chr13:22242174-23594702_3	chr13:22658291:rs9634379:A:G	6.35073	0.234871	0.250432		gene;var:LINC00424|
chr13:22242174-23594702_3	chr13:22670054:rs6490695:T:C	7.40658	0.232863	0.248526		gene;var:LINC00424|
chr13:22242174-23594702_3	chr13:22657130:rs7335868:A:C	7.22741	0.232197	0.248062		gene;var:LINC00424|
chr13:22242174-23594702_3	chr13:22659753:rs56364596:T:C	6.2415	0.232424	0.247948		gene;var:LINC00424|
chr13:22242174-23594702_3	chr13:22683159:rs4770245:A:C	7.38903	0.231931	0.247568		gene;var:LINC00424|
chr13:22242174-23594702_3	chr13:22685153:rs73166780:C:G	5.8172	0.450965	0.24635	peak|	gene;var:LINC00424|
chr13:22242174-23594702_2	chr13:22669058:rs17075855:A:G	7.31939	0.230454	0.246116		gene;var:LINC00424|
chr13:22242174-23594702_3	chr13:22668807:rs1570457:A:G	7.31047	0.230338	0.246003		gene;var:LINC00424|
chr13:22242174-23594702_3	chr13:22668605:rs1570456:A:G	7.2895	0.230159	0.245834		gene;var:LINC00424|
chr13:22242174-23594702_3	chr13:22658495:rs9552591:A:G	7.29956	0.230084	0.245746		gene;var:LINC00424|
chr13:22242174-23594702_3	chr13:22675890:rs9552595:T:C	5.81227	0.229587	0.245607		gene;var:LINC00424|
chr13:22242174-23594702_3	chr13:22658399:rs9552590:T:C	6.3988	0.229447	0.245012		gene;var:LINC00424|
chr13:22242174-23594702_3	chr13:22658646:rs9550811:A:G	7.21133	0.449436	0.244989	peak|	gene;var:LINC00424|
chr13:22242174-23594702_3	chr13:22665146:rs9552593:A:G	5.86739	0.229057	0.244978		gene;var:LINC00424|
chr13:22242174-23594702_3	chr13:22662315:rs9509993:T:C	5.90761	0.229057	0.244878		gene;var:LINC00424|
chr13:22242174-23594702_3	chr13:22654608:rs73166743:T:C	7.15266	0.229158	0.244847		gene;var:LINC00424|
chr13:22242174-23594702_3	chr13:22665512:rs7999220:T:C	6.00759	0.228796	0.244399		gene;var:LINC00424|
chr13:22242174-23594702_3	chr13:22670379:rs9552594:T:G	5.89815	0.228685	0.2443		gene;var:LINC00424|
chr1:34799758-37549183_3	chr1:36598214:rs6700737:A:G	-6.33386	1	1		gene;var:TRAPPC3|
chr1:34799758-37549183_3	chr1:36612955:rs4652902:A:C	-6.72163	1	1	peak|	gene;var:TRAPPC3|
chr1:34799758-37549183_3	chr1:36579215:rs4653159:A:G	-5.67072	0.403403	0.526218		gene;var:COL8A2|
chr1:34799758-37549183_3	chr1:36611287:rs6425966:A:G	-6.69491	0.323841	0.50022		gene;var:TRAPPC3|
chr1:34799758-37549183_3	chr1:36608414:rs1033890:T:C	-6.42894	0.259977	0.40548		gene;var:TRAPPC3|
chr1:34799758-37549183_3	chr1:36613380:rs7522400:A:G	-6.42473	0.499148	0.404263	peak|	gene;var:TRAPPC3|
chr1:34799758-37549183_3	chr1:36621186:rs737381:C:G	-5.48576	0.641481	0.400684	Promoter|	gene;var:TRAPPC3|
chr1:34799758-37549183_3	chr1:36606620:rs6664296:A:G	-6.40732	0.255974	0.399305		gene;var:TRAPPC3|
chr1:34799758-37549183_3	chr1:36614713:rs10752586:C:G	-6.34739	0.653676	0.394075	Promoter|DAR|peak|	gene;var:TRAPPC3|
chr1:34799758-37549183_3	chr1:36579648:rs11263853:A:G	-5.51259	0.278033	0.389822		gene;var:COL8A2|
chr1:34799758-37549183_3	chr1:36600311:rs12033825:T:C	-6.30318	0.472851	0.382463	peak|	gene;var:TRAPPC3|
chr1:34799758-37549183_3	chr1:36595664:rs274120:A:G	-6.31008	0.246151	0.382287		gene;var:TRAPPC3|
chr1:34799758-37549183_3	chr1:36608402:rs1033891:A:G	-6.09374	0.221375	0.342936		gene;var:TRAPPC3|
chr1:34799758-37549183_3	chr1:36610722:rs3767708:A:C	-6.03244	0.427709	0.334097	peak|	gene;var:TRAPPC3|
chr1:34799758-37549183_3	chr1:36602943:rs2231318:T:C	-5.96663	0.419101	0.328033	peak|	gene;var:TRAPPC3|
chr13:71526791-73934089_1	chr13:73624990:rs7325460:A:G	-5.54701	0.656094	0.749691		gene;var:KLF5|
chr13:71526791-73934089_1	chr13:73625133:rs7325844:A:G	-5.62773	0.589577	0.695728		gene;var:KLF5|
chr13:71526791-73934089_1	chr13:73639371:rs9530143:A:G	-5.9974	0.835205	0.665745	peak|	gene;var:KLF5|
chr13:71526791-73934089_1	chr13:73645996:rs4885062:T:G	-5.9801	0.520964	0.657412		gene;var:KLF5|
chr13:71526791-73934089_1	chr13:73637457:rs9592879:C:G	-5.94784	0.509507	0.645562		gene;var:KLF5|
chr13:71526791-73934089_1	chr13:73646672:rs73220655:A:G	-5.91799	0.50181	0.63784		gene;var:KLF5|
chr13:71526791-73934089_1	chr13:73644893:rs17285550:A:G	-5.84241	0.481029	0.616206		gene;var:KLF5|
chr13:71526791-73934089_1	chr13:73634051:rs73220641:T:C	-5.51886	0.880553	0.553512	Promoter|CRE|DAR|peak|	gene;var:KLF5|cre:KLF5|
chr1:37549183-38731847_1	chr1:38076621:rs10908363:T:C	-5.45545	0.403847	0.752404		gene;var:GNL2|
chr1:37549183-38731847_1	chr1:38078300:rs4652964:A:G	-5.45192	0.948069	0.747596	3_UTR|	gene;var:GNL2|
chr13:75670143-77410555_1	chr13:76258720:rs9544024:A:G	-6.79108	1	1		gene;var:LMO7|
chr13:75670143-77410555_2	chr13:76259070:rs9530460:T:C	-6.09741	1	1		gene;var:LMO7|
chr14:51493572-53474383_1	chr14:53386836:rs8009633:C:G	-5.57679	0.732173	0.813013		gene;var:FERMT2|
chr14:51493572-53474383_1	chr14:53418233:rs28365937:A:C	-5.90549	0.955486	0.677084	Promoter|	gene;var:FERMT2|
chr14:51493572-53474383_1	chr14:53420358:rs35413927:A:G	-5.89919	0.519529	0.674961		gene;var:FERMT2|
chr14:51493572-53474383_1	chr14:53415359:rs17125973:A:G	-5.83488	0.494102	0.645866		gene;var:FERMT2|
chr14:51493572-53474383_1	chr14:53424200:rs8004365:T:C	-5.56955	0.452235	0.591081		gene;var:FERMT2|
chr14:51493572-53474383_1	chr14:53413208:rs12885689:A:C	-5.46367	0.395463	0.524102		gene;var:FERMT2|
chr14:53474383-53997831_10	chr14:53953850:rs61986158:T:C	-5.47315	0.194937	0.266863		gene;var:DDHD1|
chr14:53474383-53997831_10	chr14:53975570:rs1959830:T:C	-5.46226	0.193501	0.263186		gene;var:DDHD1|
chr14:53474383-53997831_10	chr14:53989447:rs2251171:A:G	-6.13312	0.188174	0.248924		gene;var:DDHD1|
chr14:53474383-53997831_10	chr14:53960089:rs12433661:A:G	-6.28843	0.233918	0.246087		gene;var:DDHD1|
chr14:53474383-53997831_10	chr14:53945519:rs1959825:T:C	-6.13731	0.186794	0.245847		gene;var:DDHD1|
chr14:53474383-53997831_10	chr14:53971199:rs4901428:A:G	-6.28843	0.235285	0.245289		gene;var:DDHD1|
chr14:53474383-53997831_10	chr14:53958972:rs1954317:A:G	-6.27676	0.452808	0.242942	peak|	gene;var:DDHD1|
chr14:53474383-53997831_10	chr14:53989952:rs11623384:T:C	-5.537	0.525776	0.23774	DAR|peak|	gene;var:DDHD1|
chr14:53474383-53997831_10	chr14:53975404:rs1959829:A:T	-6.24364	0.217748	0.237302		gene;var:DDHD1|
chr14:53474383-53997831_10	chr14:53960047:rs11157972:A:G	-6.23871	0.215105	0.237186		gene;var:DDHD1|
chr14:53474383-53997831_10	chr14:53967531:rs7157758:A:T	-6.20936	0.207244	0.232887		gene;var:DDHD1|
chr14:53474383-53997831_10	chr14:53982026:rs61987596:T:C	-5.49614	0.175918	0.230898		gene;var:DDHD1|
chr14:53474383-53997831_10	chr14:53977064:rs1959832:A:G	-5.48653	0.175332	0.22937		gene;var:DDHD1|
chr14:53474383-53997831_10	chr14:53969963:rs7141330:A:T	-6.18669	0.202046	0.228222		gene;var:DDHD1|
chr14:53474383-53997831_10	chr14:53962624:rs2185821:A:T	-6.17751	0.19937	0.227624		gene;var:DDHD1|
chr14:53474383-53997831_10	chr14:53975331:rs1959828:T:C	-6.17914	0.199908	0.227039		gene;var:DDHD1|
chr14:53474383-53997831_10	chr14:53979243:rs12433314:A:C	-5.46076	0.173845	0.225418		gene;var:DDHD1|
chr14:53474383-53997831_10	chr14:53962563:rs17253291:A:G	-6.15778	0.195321	0.224734		gene;var:DDHD1|
chr14:53474383-53997831_10	chr14:53955742:rs12147440:A:G	-6.12913	0.190378	0.219875		gene;var:DDHD1|
chr14:53474383-53997831_10	chr14:53970675:rs10130556:C:G	-6.0854	0.184601	0.214501		gene;var:DDHD1|
chr14:53474383-53997831_9	chr14:53948214:rs1954311:T:C	-6.0564	0.18153	0.212404		gene;var:DDHD1|
chr14:53474383-53997831_9	chr14:53989595:rs2243562:T:C	-6.03496	0.17935	0.2119		gene;var:DDHD1|
chr14:53474383-53997831_10	chr14:53983233:rs1343920:A:G	-6.01535	0.177877	0.209725		gene;var:DDHD1|
chr14:53474383-53997831_10	chr14:53944929:rs1959824:A:G	-6.03486	0.179709	0.209103		gene;var:DDHD1|
chr14:53474383-53997831_10	chr14:53976945:rs1959831:A:G	-6.00067	0.176934	0.208166		gene;var:DDHD1|
chr14:53474383-53997831_10	chr14:53979814:rs4901431:A:G	-5.99277	0.176478	0.20735		gene;var:DDHD1|
chr14:53474383-53997831_10	chr14:53987457:rs2250947:A:G	-5.99214	0.176443	0.207286		gene;var:DDHD1|
chr14:53474383-53997831_10	chr14:53976012:rs9672027:T:G	-6.01418	0.178392	0.206958		gene;var:DDHD1|
chr14:53474383-53997831_10	chr14:53984191:rs2247779:T:C	-5.97908	0.175772	0.205977		gene;var:DDHD1|
chr14:53474383-53997831_10	chr14:53952004:rs12437319:A:G	-5.99813	0.177528	0.204527		gene;var:DDHD1|
chr14:53474383-53997831_10	chr14:53988050:rs2251069:T:C	-5.94001	0.174283	0.202325		gene;var:DDHD1|
chr14:53474383-53997831_10	chr14:53944960:rs4592573:C:G	-5.96476	0.175952	0.202293		gene;var:DDHD1|
chr14:53474383-53997831_10	chr14:53990568:rs2251294:A:G	-5.89319	0.172333	0.201137		gene;var:DDHD1|
chr14:53474383-53997831_10	chr14:53948967:rs10136411:A:G	-5.87663	0.175097	0.194903		gene;var:DDHD1|
chr14:53474383-53997831_10	chr14:53992930:rs2251589:A:G	-5.79913	0.172229	0.194511		gene;var:DDHD1|
chr14:53474383-53997831_10	chr14:53940700:rs1954308:A:G	-5.82668	0.175176	0.192686		gene;var:DDHD1|
chr14:53474383-53997831_10	chr14:53938972:rs4898805:T:C	-5.82076	0.175297	0.192354		gene;var:DDHD1|
chr14:53474383-53997831_10	chr14:53930172:rs12433714:A:G	-5.76399	0.514675	0.192131	DAR|peak|	gene;var:DDHD1|
chr14:53474383-53997831_10	chr14:53937426:rs1954307:A:G	-5.80476	0.355139	0.191981	peak|	gene;var:DDHD1|
chr14:53474383-53997831_10	chr14:53939120:rs4901426:A:G	-5.80271	0.175734	0.191389		gene;var:DDHD1|
chr14:53474383-53997831_10	chr14:53938083:rs7140673:A:G	-5.76964	0.176171	0.190193		gene;var:DDHD1|
chr14:59448336-61680424_8	chr14:60806759:rs7493429:A:C	13.9299	1	1		gene;var:PPM1A|
chr14:59448336-61680424_1	chr14:60806976:rs6573308:T:C	16.1504	1	1		gene;var:PPM1A|
chr14:59448336-61680424_2	chr14:60808002:rs4436712:T:G	12.9423	1	1		gene;var:PPM1A|
chr14:59448336-61680424_3	chr14:60808553:rs201472303:C:G	10.4247	1	1		gene;var:PPM1A|
chr14:59448336-61680424_4	chr14:60827812:rs7150130:T:C	10.8419	1	1		gene;var:PPM1A|
chr14:59448336-61680424_10	chr14:60842391:rs1254268:A:G	12.8802	0	1		gene;var:C14orf39|
chr14:59448336-61680424_5	chr14:60865653:rs199627051:A:G	9.88873	1	1		gene;var:C14orf39|
chr14:59448336-61680424_6	chr14:60976537:rs33912345:A:C	16.6697	1	1	Promoter|CRE|DAR|peak|	gene;var:SIX6|cre:SIX4|cre:C14orf39|cre:MNAT1|cre:SIX6|
chr14:59448336-61680424_7	chr14:61005625:rs1010053:A:G	12.3325	0	0.491207		gene;var:SIX6|
chr14:59448336-61680424_7	chr14:61006889:rs12883754:T:C	12.3368	0	0.377072		gene;var:SIX6|
chr14:59448336-61680424_7	chr14:61012559:rs12589689:A:T	12.3636	0	0.0728983		gene;var:SIX6|
chr14:59448336-61680424_7	chr14:61007104:rs10146342:A:G	12.3681	0	0.0555507		gene;var:SIX6|
chr14:72889615-76444767_1	chr14:75084829:rs754458:A:G	-6.29455	0.556578	0.270058	DAR|peak|	gene;var:LTBP2|
chr14:72889615-76444767_1	chr14:75097431:rs754634:T:C	-6.17056	0.11749	0.183185		gene;var:LTBP2|
chr14:72889615-76444767_1	chr14:75098313:rs11159096:A:G	-6.18392	0.109587	0.170034		gene;var:LTBP2|
chr14:72889615-76444767_1	chr14:75101307:rs2098499:A:G	-6.16053	0.101805	0.156787		gene;var:LTBP2|
chr14:72889615-76444767_1	chr14:75083881:rs4903249:T:C	-6.153	0.100915	0.1537		gene;var:LTBP2|
chr14:72889615-76444767_1	chr14:75098519:rs11622388:C:G	-6.14178	0.0963653	0.147509		gene;var:LTBP2|
chr14:72889615-76444767_1	chr14:75098696:rs11627134:T:C	-6.08105	0.0859826	0.129843		gene;var:LTBP2|
chr14:72889615-76444767_1	chr14:75100485:rs4903254:T:C	-6.07511	0.081614	0.122258		gene;var:LTBP2|
chr14:72889615-76444767_1	chr14:75099883:rs11159097:T:C	-6.06543	0.0799585	0.119413		gene;var:LTBP2|
chr14:72889615-76444767_1	chr14:75079704:rs2165197:T:C	6.06802	0.23727	0.107007	Promoter|CRE|peak|	gene;var:LTBP2|cre:LTBP2|
chr14:72889615-76444767_1	chr14:75079819:rs2165198:A:T	6.06157	0.234939	0.105681	Promoter|	gene;var:LTBP2|
chr14:72889615-76444767_1	chr14:75101982:rs11852134:A:G	-5.98297	0.0711207	0.104204		gene;var:LTBP2|
chr14:95750867-96262415_1	chr14:95956875:rs72692789:T:C	-5.48005	0.754145	0.754145		gene;var:SYNE3|
chr14:95750867-96262415_1	chr14:95959897:rs72692790:T:C	-5.474	0.745855	0.745855		gene;var:SYNE3|
chr1:51713726-54226262_2	chr1:54038523:rs11206174:C:G	5.83693	1	1	CRE|DAR|peak|	gene;var:DMRTB1|cre:LRP8|cre:LINC01771|
chr1:51713726-54226262_3	chr1:54135078:rs1465037:A:C	6.03701	0.15977	0.168096		gene;var:GLIS1|
chr1:51713726-54226262_3	chr1:54131753:rs4927025:T:C	6.01338	0.156939	0.164237		gene;var:GLIS1|
chr1:51713726-54226262_3	chr1:54133723:rs67319173:A:T	6.01063	0.148843	0.15595		gene;var:GLIS1|
chr1:51713726-54226262_3	chr1:54158762:rs11206193:C:G	6.04096	0.143218	0.154878		gene;var:GLIS1|
chr1:51713726-54226262_3	chr1:54135334:rs1554750:T:C	6.00699	0.147433	0.154392		gene;var:GLIS1|
chr1:51713726-54226262_3	chr1:54161087:rs6665257:T:C	6.03244	0.14019	0.151355		gene;var:GLIS1|
chr1:51713726-54226262_3	chr1:54165624:rs11206196:A:G	6.02917	0.139059	0.150042		gene;var:GLIS1|
chr1:51713726-54226262_3	chr1:54167688:rs7523018:A:G	6.00958	0.132559	0.142017		gene;var:GLIS1|
chr1:51713726-54226262_3	chr1:54129732:rs12405835:C:G	5.88808	0.126794	0.12967		gene;var:GLIS1|
chr1:51713726-54226262_3	chr1:54127969:rs11206187:A:G	5.61037	0.0959297	0.0977333		gene;var:GLIS1|
chr1:51713726-54226262_3	chr1:54126754:rs12026298:A:T	5.66122	0.0927449	0.094743		gene;var:GLIS1|
chr1:51713726-54226262_3	chr1:54125615:rs28743002:A:G	5.65439	0.0918357	0.0938642		gene;var:GLIS1|
chr1:51713726-54226262_3	chr1:54178501:rs12080993:T:G	5.76001	0.0877633	0.0924098		gene;var:GLIS1|
chr1:51713726-54226262_3	chr1:54163251:rs7519965:A:G	5.71813	0.0868873	0.0919219		gene;var:GLIS1|
chr1:51713726-54226262_3	chr1:54165541:rs1615037:T:C	5.91708	0.0898849	0.0918595		gene;var:GLIS1|
chr1:51713726-54226262_3	chr1:54166790:rs6588487:A:G	5.75424	0.0865696	0.0916499		gene;var:GLIS1|
chr1:51713726-54226262_3	chr1:54158155:rs7555617:A:C	5.71316	0.0864507	0.0914743		gene;var:GLIS1|
chr1:51713726-54226262_3	chr1:54158475:rs7544346:T:C	5.70683	0.0859139	0.0909259		gene;var:GLIS1|
chr1:51713726-54226262_3	chr1:54169455:rs4927029:C:G	5.70302	0.183402	0.0906069	peak|	gene;var:GLIS1|
chr1:51713726-54226262_3	chr1:54178270:rs12080903:A:G	5.74237	0.0851202	0.0898714		gene;var:GLIS1|
chr1:51713726-54226262_3	chr1:54173551:rs17109178:C:G	5.72671	0.083879	0.0886191		gene;var:GLIS1|
chr1:51713726-54226262_3	chr1:54158102:rs11206191:A:G	5.70921	0.0831469	0.088193		gene;var:GLIS1|
chr1:51713726-54226262_3	chr1:54175548:rs17109200:A:G	5.75347	0.0829843	0.0877803		gene;var:GLIS1|
chr1:51713726-54226262_3	chr1:54158220:rs7555711:A:G	5.69817	0.0824451	0.0875014		gene;var:GLIS1|
chr1:51713726-54226262_3	chr1:54171981:rs55786134:T:C	5.69181	0.176169	0.0871287	peak|	gene;var:GLIS1|
chr1:51713726-54226262_3	chr1:54160235:rs10888803:T:C	5.68925	0.0819146	0.0869838		gene;var:GLIS1|
chr1:51713726-54226262_3	chr1:54160812:rs6673378:T:G	5.68699	0.0817853	0.0868584		gene;var:GLIS1|
chr1:51713726-54226262_3	chr1:54162471:rs6661728:A:G	5.68672	0.0817703	0.0868439		gene;var:GLIS1|
chr1:51713726-54226262_3	chr1:54165910:rs11206198:A:C	5.68397	0.081616	0.0866947		gene;var:GLIS1|
chr1:51713726-54226262_3	chr1:54158462:rs7555908:A:G	5.68333	0.08158	0.08666		gene;var:GLIS1|
chr1:51713726-54226262_3	chr1:54164998:rs6658053:A:T	5.68294	0.0815586	0.0866393		gene;var:GLIS1|
chr1:51713726-54226262_3	chr1:54159198:rs6694399:T:C	5.68114	0.0814599	0.0865443		gene;var:GLIS1|
chr1:51713726-54226262_3	chr1:54158690:rs11206192:A:G	5.6781	0.0812959	0.0863868		gene;var:GLIS1|
chr1:51713726-54226262_3	chr1:54159005:rs6658245:T:C	5.67697	0.081236	0.0863295		gene;var:GLIS1|
chr1:51713726-54226262_3	chr1:54159079:rs6691833:C:G	5.67573	0.0811705	0.0862668		gene;var:GLIS1|
chr1:51713726-54226262_3	chr1:54160709:rs61184814:T:G	5.67036	0.0808942	0.0860037		gene;var:GLIS1|
chr1:51713726-54226262_3	chr1:54168545:rs11206200:T:C	5.66773	0.0807631	0.0858794		gene;var:GLIS1|
chr1:51713726-54226262_3	chr1:54161545:rs4927028:T:C	5.6662	0.0806877	0.0858082		gene;var:GLIS1|
chr1:51713726-54226262_3	chr1:54161112:rs6695509:A:G	5.65716	0.0802603	0.0854075		gene;var:GLIS1|
chr1:51713726-54226262_3	chr1:54168609:rs12040081:A:G	5.65671	0.0802399	0.0853886		gene;var:GLIS1|
chr1:51713726-54226262_3	chr1:54164799:rs6657830:A:G	5.65242	0.0800481	0.0852107		gene;var:GLIS1|
chr1:51713726-54226262_3	chr1:54166777:rs6588486:A:G	5.64813	0.0798624	0.0850398		gene;var:GLIS1|
chr1:51713726-54226262_3	chr1:54156624:rs12082358:A:C	5.58998	0.0799595	0.0849269		gene;var:GLIS1|
chr1:51713726-54226262_3	chr1:54170801:rs12097598:C:G	5.64477	0.0797215	0.0849109		gene;var:GLIS1|
chr1:51713726-54226262_3	chr1:54170963:rs11206201:A:C	5.64046	0.0795461	0.0847516		gene;var:GLIS1|
chr1:51713726-54226262_3	chr1:54133345:rs6658469:A:C	5.67462	0.0808474	0.0846551		gene;var:GLIS1|
chr1:51713726-54226262_3	chr1:54162635:rs59020945:A:G	5.63516	0.0793392	0.0845656		gene;var:GLIS1|
chr1:51713726-54226262_3	chr1:54163207:rs7512093:T:G	5.63155	0.0792037	0.0844448		gene;var:GLIS1|
chr1:51713726-54226262_3	chr1:54163128:rs7554633:A:G	5.62688	0.0790346	0.0842955		gene;var:GLIS1|
chr1:51713726-54226262_3	chr1:54165831:rs11206197:A:G	5.62547	0.078985	0.0842521		gene;var:GLIS1|
chr1:51713726-54226262_3	chr1:54164165:rs12041221:A:G	5.62215	0.0788703	0.0841521		gene;var:GLIS1|
chr1:51713726-54226262_3	chr1:54175360:rs12025857:T:C	5.67735	0.0788199	0.0837778		gene;var:GLIS1|
chr1:51713726-54226262_3	chr1:54175971:rs1879733:T:C	5.65242	0.0778977	0.0829579		gene;var:GLIS1|
chr1:51713726-54226262_3	chr1:54180287:rs2186041:A:G	5.61852	0.0780535	0.0829389		gene;var:GLIS1|
chr1:51713726-54226262_3	chr1:54175861:rs1879731:A:G	5.65156	0.0778691	0.0829333		gene;var:GLIS1|
chr1:51713726-54226262_3	chr1:54175629:rs12043690:T:C	5.64888	0.077782	0.0828585		gene;var:GLIS1|
chr1:51713726-54226262_1	chr1:54157742:rs12076192:A:G	5.5775	0.0773019	0.082838		gene;var:GLIS1|
chr1:51713726-54226262_3	chr1:54175909:rs1879732:T:C	5.64771	0.0777448	0.0828268		gene;var:GLIS1|
chr1:51713726-54226262_1	chr1:54164156:rs11206195:T:C	5.59298	0.0770712	0.0822751		gene;var:GLIS1|
chr1:51713726-54226262_1	chr1:54174607:rs11206202:A:G	5.59478	0.0764643	0.0818336		gene;var:GLIS1|
chr1:51713726-54226262_1	chr1:54182502:rs56087009:A:C	5.52547	0.0763894	0.0814898		gene;var:GLIS1|
chr1:51713726-54226262_1	chr1:54181942:rs1526911:C:G	5.52135	0.0762982	0.0814219		gene;var:GLIS1|
chr15:55136269-56901773_1	chr15:56843099:rs1384126:A:T	5.95205	0.875735	0.875735		gene;var:ZNF280D|
chr15:55136269-56901773_2	chr15:56889952:rs2128174:C:G	6.05582	0.8318	0.8318		gene;var:ZNF280D|
chr15:55136269-56901773_2	chr15:56870145:rs12913729:T:C	5.78944	0.497637	0.497637		gene;var:ZNF280D|
chr15:55136269-56901773_2	chr15:56844967:rs3912292:T:C	5.76197	0.491124	0.491124		gene;var:ZNF280D|
chr15:55136269-56901773_2	chr15:56846054:rs12907686:T:G	5.68978	0.48285	0.48285		gene;var:ZNF280D|
chr15:55136269-56901773_1	chr15:56841967:rs12903746:T:C	5.97316	0.469045	0.469045		gene;var:MNS1|
chr15:55136269-56901773_1	chr15:56828094:rs1715896:A:G	5.8946	0.457029	0.457029		gene;var:MNS1|
chr15:55136269-56901773_1	chr15:56848479:rs12591616:A:G	5.88927	0.43237	0.43237		gene;var:ZNF280D|
chr15:61265836-63215222_1	chr15:61947280:rs12438742:C:G	-6.1725	0.732059	0.732059		gene;var:VPS13C|
chr15:61265836-63215222_1	chr15:61966724:rs2253095:A:C	5.46631	0.725391	0.725391		gene;var:VPS13C|
chr15:61265836-63215222_1	chr15:61936356:rs56187701:T:C	-5.74995	0.719158	0.719158		gene;var:VPS13C|
chr15:61265836-63215222_1	chr15:61951235:rs4775427:T:C	-5.95286	0.651232	0.651232		gene;var:VPS13C|
chr15:61265836-63215222_1	chr15:61957236:rs3848125:A:G	-5.88632	0.638866	0.638866		gene;var:VPS13C|
chr15:61265836-63215222_1	chr15:61946574:rs4775425:A:G	-5.88611	0.628853	0.628853		gene;var:VPS13C|
chr15:61265836-63215222_1	chr15:61958029:rs2249195:A:C	-5.48627	0.558198	0.558198		gene;var:VPS13C|
chr15:61265836-63215222_1	chr15:61951110:rs4775426:T:C	-5.48047	0.553784	0.553784		gene;var:VPS13C|
chr15:65104668-67094767_3	chr15:67034276:rs1078407:A:G	5.92915	0.21799	0.331344		gene;var:SMAD6|
chr15:65104668-67094767_3	chr15:66989515:rs11857194:T:C	6.40136	0.154531	0.31776		gene;var:SMAD6|
chr15:65104668-67094767_3	chr15:66990159:rs7497064:T:C	6.33118	0.147167	0.301953		gene;var:SMAD6|
chr15:65104668-67094767_3	chr15:67020568:rs7167440:T:C	5.86332	0.189225	0.297117		gene;var:SMAD6|
chr15:65104668-67094767_3	chr15:67035153:rs755450:A:G	5.7854	0.183539	0.289813		gene;var:SMAD6|
chr15:65104668-67094767_3	chr15:67034918:rs755452:A:G	5.78521	0.183503	0.289769		gene;var:SMAD6|
chr15:65104668-67094767_3	chr15:67025403:rs2439386:T:C	6.45433	0.144364	0.288551		gene;var:SMAD6|
chr15:65104668-67094767_3	chr15:67024951:rs2439387:T:C	6.44579	0.143323	0.286543		gene;var:SMAD6|
chr15:65104668-67094767_3	chr15:67022470:rs11853853:T:G	5.75999	0.178718	0.283836		gene;var:SMAD6|
chr15:65104668-67094767_3	chr15:67026217:rs2053423:T:C	6.4229	0.140616	0.281303		gene;var:SMAD6|
chr15:65104668-67094767_3	chr15:67023845:rs2469077:A:G	6.42019	0.29062	0.280697	peak|	gene;var:SMAD6|
chr15:65104668-67094767_3	chr15:67026566:rs2469148:T:G	6.3799	0.605424	0.27201	CRE|DAR|peak|	gene;var:SMAD6|cre:SMAD6|
chr15:65104668-67094767_3	chr15:67026861:rs2439385:T:G	6.37853	0.604981	0.271724	CRE|DAR|peak|	gene;var:SMAD6|cre:SMAD6|
chr15:65104668-67094767_3	chr15:66995323:rs4776822:A:G	6.1948	0.388091	0.268096	Promoter|CRE|peak|	gene;var:SMAD6|cre:SMAD6|
chr15:65104668-67094767_3	chr15:66999095:rs62005623:T:C	6.18171	0.578663	0.265497	CRE|DAR|peak|	gene;var:SMAD6|cre:SMAD6|
chr15:65104668-67094767_3	chr15:66998857:rs76912608:T:C	6.17518	0.576815	0.264221	CRE|DAR|peak|	gene;var:SMAD6|cre:SMAD6|
chr15:65104668-67094767_3	chr15:66997087:rs17264185:A:G	6.06507	0.119065	0.246822		gene;var:SMAD6|
chr15:65104668-67094767_3	chr15:66998069:rs57092023:A:G	6.07615	0.118751	0.246664		gene;var:SMAD6|
chr15:65104668-67094767_3	chr15:67029307:rs11636413:T:C	5.59691	0.148095	0.246346		gene;var:SMAD6|
chr15:65104668-67094767_3	chr15:66997596:rs62005620:A:C	6.07229	0.248703	0.246043	peak|	gene;var:SMAD6|
chr15:65104668-67094767_3	chr15:67029247:rs11636377:T:C	5.59067	0.147287	0.245346		gene;var:SMAD6|
chr15:65104668-67094767_3	chr15:66992157:rs4776314:T:C	6.06641	0.118869	0.24406		gene;var:SMAD6|
chr15:65104668-67094767_3	chr15:66998881:rs111321700:T:C	6.05944	0.547119	0.244011	CRE|DAR|peak|	gene;var:SMAD6|cre:SMAD6|
chr15:65104668-67094767_3	chr15:66997673:rs62005621:A:G	6.02606	0.242612	0.238968	peak|	gene;var:SMAD6|
chr15:65104668-67094767_3	chr15:67028795:rs4567655:T:C	5.48512	0.280535	0.230182	peak|	gene;var:SMAD6|
chr15:65104668-67094767_3	chr15:67000123:rs3809571:C:G	5.83603	0.328061	0.21607	Promoter|CRE|DAR|peak|	gene;var:SMAD6|cre:SMAD6|
chr15:65104668-67094767_3	chr15:67005714:rs111369636:A:G	5.7403	0.216031	0.205985	peak|	gene;var:SMAD6|
chr15:65104668-67094767_3	chr15:66992715:rs8041981:A:C	5.691	0.101783	0.205108		gene;var:SMAD6|
chr15:65104668-67094767_3	chr15:67007697:rs4776315:A:T	5.69468	0.10037	0.20002		gene;var:SMAD6|
chr15:65104668-67094767_1	chr15:67007813:rs4776316:A:G	5.58929	0.0987713	0.195764		gene;var:SMAD6|
chr15:65104668-67094767_1	chr15:67022403:rs2469081:T:C	5.64781	0.0988721	0.195729		gene;var:SMAD6|
chr15:65104668-67094767_3	chr15:67014742:rs893902:T:C	5.62205	0.09869	0.195253		gene;var:SMAD6|
chr15:65104668-67094767_3	chr15:67020437:rs2469087:T:C	5.59779	0.0985948	0.194847		gene;var:SMAD6|
chr15:65104668-67094767_3	chr15:67019948:rs2469090:C:G	5.56031	0.098378	0.194129		gene;var:SMAD6|
chr15:65104668-67094767_3	chr15:67019313:rs2439391:A:C	5.54641	0.209001	0.194013	peak|	gene;var:SMAD6|
chr15:73628714-76398624_2	chr15:74230660:rs59755145:A:G	6.56013	0.365868	0.680447		gene;var:LOXL1-AS1|
chr15:73628714-76398624_1	chr15:74221298:rs1550437:T:C	-7.83698	0.653908	0.402917	Promoter|peak|	gene;var:LOXL1-AS1|
chr15:73628714-76398624_1	chr15:74222028:rs8034403:A:G	-7.65089	0.197889	0.341618		gene;var:LOXL1-AS1|
chr15:73628714-76398624_1	chr15:74222987:rs1078967:T:C	-7.63842	0.390447	0.333113	peak|	gene;var:LOXL1-AS1|
chr15:73628714-76398624_1	chr15:74221313:rs6495085:C:G	-7.63041	0.540388	0.327909	Promoter|peak|	gene;var:LOXL1-AS1|
chr15:73628714-76398624_1	chr15:74223716:rs28522673:C:G	-7.52438	0.350587	0.27887	peak|	gene;var:LOXL1-AS1|
chr15:73628714-76398624_1	chr15:74222043:rs8034017:A:G	-7.49753	0.165565	0.269423		gene;var:LOXL1-AS1|
chr15:73628714-76398624_2	chr15:74229065:rs893817:A:G	5.98788	0.217751	0.267575		gene;var:LOXL1-AS1|
chr15:73628714-76398624_2	chr15:74231451:rs72745365:C:G	5.98061	0.226609	0.257035		gene;var:LOXL1-AS1|
chr15:73628714-76398624_2	chr15:74231179:rs66481504:A:G	5.96569	0.223221	0.253611		gene;var:LOXL1-AS1|
chr15:73628714-76398624_2	chr15:74228391:rs4077284:A:G	5.89245	0.198468	0.243456		gene;var:LOXL1-AS1|
chr15:73628714-76398624_1	chr15:74223646:rs74026308:T:G	-7.36594	0.30509	0.232583	peak|	gene;var:LOXL1-AS1|
chr15:73628714-76398624_1	chr15:74219582:rs3825942:A:G	-7.35565	0.430628	0.232144	Promoter|CRE|DAR|peak|	gene;var:LOXL1-AS1|cre:LOXL1-AS1|
chr15:73628714-76398624_2	chr15:74239871:rs72745372:T:C	5.55998	0.203545	0.23183		gene;var:LOXL1-AS1|
chr15:73628714-76398624_2	chr15:74235847:rs28758267:A:G	5.83349	0.196814	0.229807		gene;var:LOXL1-AS1|
chr15:73628714-76398624_1	chr15:74225106:rs8041642:A:G	-7.34075	0.145368	0.228306		gene;var:LOXL1-AS1|
chr15:73628714-76398624_2	chr15:74239307:rs67182653:A:G	5.47864	0.18759	0.221008		gene;var:LOXL1-AS1|
chr15:73628714-76398624_2	chr15:74242383:rs66473812:A:T	5.47684	0.37716	0.220815	peak|	gene;var:LOXL1-AS1|
chr15:73628714-76398624_2	chr15:74231733:rs66497556:A:G	5.60588	0.348464	0.212026	peak|	gene;var:LOXL1-AS1|
chr15:73628714-76398624_2	chr15:74229477:rs67173550:A:G	5.59478	0.146169	0.210734		gene;var:LOXL1-AS1|
chr15:73628714-76398624_2	chr15:74229195:rs893818:A:G	5.59353	0.14607	0.210717		gene;var:LOXL1-AS1|
chr15:73628714-76398624_2	chr15:74226145:rs58270968:A:G	5.58345	0.145283	0.210594		gene;var:LOXL1-AS1|
chr15:73628714-76398624_2	chr15:74229791:rs4886785:A:G	5.58337	0.145277	0.210593		gene;var:LOXL1-AS1|
chr16:49007926-52035823_8	chr16:51619863:rs117039551:T:C	5.78636	0.359256	0.405261		gene;var:SALL1|
chr16:49007926-52035823_8	chr16:51620053:rs115131972:A:G	5.77516	0.347377	0.393072		gene;var:SALL1|
chr16:49007926-52035823_8	chr16:51623190:rs116735759:T:C	5.70906	0.328992	0.374407		gene;var:SALL1|
chr16:49007926-52035823_8	chr16:51633241:rs118081127:T:C	5.69775	0.326077	0.371438		gene;var:SALL1|
chr16:49007926-52035823_8	chr16:51601948:rs114367221:T:C	5.97915	0.311291	0.360958		gene;var:SALL1|
chr16:49007926-52035823_8	chr16:51587989:rs4783831:A:G	5.89757	0.306871	0.354371		gene;var:SALL1|
chr16:49007926-52035823_8	chr16:51579060:rs16949932:T:G	5.87966	0.303183	0.350487		gene;var:SALL1|
chr16:49007926-52035823_8	chr16:51590885:rs116257475:T:C	5.90087	0.302837	0.350306		gene;var:SALL1|
chr16:49007926-52035823_8	chr16:51591798:rs75220267:A:G	5.89614	0.301894	0.34931		gene;var:SALL1|
chr16:49007926-52035823_8	chr16:51586315:rs74805457:A:T	5.86383	0.300045	0.347177		gene;var:SALL1|
chr16:49007926-52035823_8	chr16:51583695:rs117336047:A:G	5.82407	0.292658	0.339363		gene;var:SALL1|
chr16:49007926-52035823_7	chr16:51590298:rs115011309:T:C	5.75596	0.278312	0.32421		gene;var:SALL1|
chr16:49007926-52035823_8	chr16:51602314:rs76019747:T:G	5.74769	0.272448	0.31883		gene;var:SALL1|
chr16:49007926-52035823_8	chr16:51600239:rs8048126:T:G	5.73434	0.270862	0.317079		gene;var:SALL1|
chr16:49007926-52035823_8	chr16:51610561:rs16950037:A:G	5.73431	0.270858	0.317074		gene;var:SALL1|
chr16:49007926-52035823_8	chr16:51616373:rs78185011:A:T	5.69803	0.26687	0.312653		gene;var:SALL1|
chr16:49007926-52035823_8	chr16:51602640:rs75093893:A:G	5.68646	0.265696	0.311346		gene;var:SALL1|
chr16:49007926-52035823_8	chr16:51602992:rs77632101:A:T	5.68063	0.265122	0.310706		gene;var:SALL1|
chr16:49007926-52035823_8	chr16:51605913:rs78846980:T:C	5.6761	0.264684	0.310218		gene;var:SALL1|
chr16:49007926-52035823_8	chr16:51611660:rs74659078:A:G	5.67412	0.692857	0.310007	DAR|peak|	gene;var:SALL1|
chr16:49007926-52035823_8	chr16:51615809:rs74853977:A:G	5.67388	0.264471	0.309981		gene;var:SALL1|
chr16:49007926-52035823_8	chr16:51611916:rs78526715:T:C	5.66856	0.691985	0.309421	DAR|peak|	gene;var:SALL1|
chr16:49007926-52035823_8	chr16:51603096:rs118174072:A:G	5.66714	0.263838	0.309273		gene;var:SALL1|
chr16:49007926-52035823_8	chr16:51617014:rs16950059:T:G	5.65895	0.263089	0.308435		gene;var:SALL1|
chr16:49007926-52035823_8	chr16:51614300:rs10451121:A:G	5.56076	0.255819	0.300212		gene;var:SALL1|
chr16:63691589-65938566_3	chr16:65067443:rs12447201:T:C	-5.87537	0.117735	0.192931		gene;var:CDH11|
chr16:63691589-65938566_3	chr16:65055840:rs257336:T:G	-5.85934	0.116095	0.18975		gene;var:CDH11|
chr16:63691589-65938566_3	chr16:65034726:rs35189:A:T	-5.56063	0.117401	0.187752		gene;var:CDH11|
chr16:63691589-65938566_3	chr16:65076929:rs1879260:T:C	-5.85591	0.240735	0.187399	peak|	gene;var:CDH11|	16:65076929:T:C:CDH11|
chr16:63691589-65938566_3	chr16:65073920:rs77117097:T:C	-5.82108	0.110306	0.180715		gene;var:CDH11|
chr16:63691589-65938566_3	chr16:65060817:rs878359:A:G	-5.80515	0.107831	0.176384		gene;var:CDH11|
chr16:63691589-65938566_3	chr16:65080739:rs1874458:A:G	-5.80271	0.22703	0.175871	peak|	gene;var:CDH11|	16:65080739:A:G:CDH11|
chr16:63691589-65938566_3	chr16:65072278:rs1520230:T:C	-5.80072	0.51159	0.175502	CRE|peak|	gene;var:CDH11|cre:CDH11|	16:65072278:T:C:CDH11|16:65072278:T:C:CDH11|
chr16:63691589-65938566_3	chr16:65071826:rs12920174:T:C	-5.7974	0.510272	0.174906	CRE|DAR|peak|	gene;var:CDH11|cre:CDH11|	16:65071826:T:C:CDH11|16:65071826:T:C:CDH11|
chr16:63691589-65938566_3	chr16:65090019:rs1520234:C:G	-5.78131	0.105376	0.172514		gene;var:CDH11|
chr16:63691589-65938566_3	chr16:65086581:rs1356823:T:C	-5.77251	0.221274	0.171102	peak|	gene;var:CDH11|	16:65086581:T:C:CDH11|
chr16:63691589-65938566_3	chr16:64990771:rs35140:A:G	-5.72654	0.100938	0.164957		gene;var:CDH11|
chr16:63691589-65938566_3	chr16:65023581:rs35198:T:G	-5.72407	0.100706	0.164527		gene;var:CDH11|
chr16:63691589-65938566_3	chr16:65009466:rs35224:A:G	-5.71501	0.100177	0.163688		gene;var:CDH11|
chr16:63691589-65938566_3	chr16:65007916:rs35226:T:C	-5.70936	0.0998266	0.163103		gene;var:CDH11|
chr16:63691589-65938566_3	chr16:65025718:rs35195:A:G	-5.70817	0.305298	0.162854	Exon|	gene;var:CDH11|	16:65025718:A:G:CDH11|
chr16:63691589-65938566_3	chr16:65053447:rs257487:A:G	-5.70419	0.099521	0.162546		gene;var:CDH11|
chr16:63691589-65938566_3	chr16:65022577:rs35199:T:C	-5.70288	0.0993911	0.162337		gene;var:CDH11|
chr16:63691589-65938566_3	chr16:65026603:rs35193:T:C	-5.69845	0.0991405	0.16192		gene;var:CDH11|
chr16:63691589-65938566_3	chr16:65065307:rs62042237:A:G	-5.69733	0.0990318	0.161788		gene;var:CDH11|
chr16:63691589-65938566_3	chr16:65018195:rs35204:A:G	-5.69413	0.210083	0.161525	peak|	gene;var:CDH11|	16:65018195:A:G:CDH11|
chr16:63691589-65938566_2	chr16:65057129:rs257335:A:G	-5.69276	0.0988302	0.161402		gene;var:CDH11|
chr16:63691589-65938566_3	chr16:64991772:rs35139:A:G	-5.68992	0.0987203	0.161255		gene;var:CDH11|
chr16:63691589-65938566_3	chr16:65048729:rs35177:T:C	-5.68938	0.0986585	0.161118		gene;var:CDH11|
chr16:63691589-65938566_1	chr16:65017973:rs35206:A:G	-5.67548	0.208206	0.159956	peak|	gene;var:CDH11|	16:65017973:A:G:CDH11|
chr16:63691589-65938566_3	chr16:65015908:rs35214:C:G	-5.66976	0.299926	0.159551	Exon|	gene;var:CDH11|	16:65015908:C:G:CDH11|
chr16:63691589-65938566_3	chr16:65011324:rs35219:T:G	-5.6688	0.0976861	0.159523		gene;var:CDH11|
chr16:63691589-65938566_3	chr16:65017568:rs35208:T:C	-5.66928	0.0977019	0.159516		gene;var:CDH11|
chr16:63691589-65938566_3	chr16:65011855:rs35218:T:C	-5.6655	0.0975372	0.159239		gene;var:CDH11|
chr16:63691589-65938566_3	chr16:64995269:rs257497:T:C	-5.65974	0.0972919	0.158862		gene;var:CDH11|
chr16:63691589-65938566_3	chr16:65015699:rs35215:T:C	-5.65918	0.298704	0.158794	Exon|	gene;var:CDH11|	16:65015699:T:C:CDH11|
chr16:63691589-65938566_3	chr16:64994228:rs462735:T:C	-5.65839	0.0972355	0.158767		gene;var:CDH11|
chr16:63691589-65938566_3	chr16:64995150:rs257498:A:C	-5.65417	0.0970635	0.158478		gene;var:CDH11|
chr16:63691589-65938566_3	chr16:65035020:rs35188:A:G	-5.64446	0.0966358	0.157735		gene;var:CDH11|
chr16:63691589-65938566_3	chr16:65051641:rs257490:T:C	-5.64312	0.0966123	0.157689		gene;var:CDH11|
chr16:63691589-65938566_3	chr16:65029640:rs35192:T:G	-5.64076	0.0965464	0.157578		gene;var:CDH11|
chr16:63691589-65938566_3	chr16:64997013:rs257341:T:C	-5.62288	0.095965	0.156624		gene;var:CDH11|
chr16:63691589-65938566_3	chr16:65031935:rs35191:A:C	-5.62196	0.0959803	0.156606		gene;var:CDH11|
chr16:63691589-65938566_3	chr16:65063629:rs1520229:A:G	-5.6096	0.468829	0.156029	CRE|DAR|peak|	gene;var:CDH11|cre:CDH11|	16:65063629:A:G:CDH11|16:65063629:A:G:CDH11|
chr16:63691589-65938566_3	chr16:64986175:rs35144:A:C	-5.61028	0.0956052	0.156013		gene;var:CDH11|
chr16:63691589-65938566_3	chr16:65063262:rs4967882:T:C	-5.60621	0.0955578	0.155884		gene;var:CDH11|
chr16:63691589-65938566_3	chr16:64985093:rs35145:A:G	-5.59731	0.0952808	0.15546		gene;var:CDH11|
chr16:63691589-65938566_3	chr16:65018449:rs35203:A:G	-5.58249	0.0950472	0.155002		gene;var:CDH11|
chr16:63691589-65938566_3	chr16:65018175:rs35205:A:G	-5.5798	0.202169	0.154849	peak|	gene;var:CDH11|	16:65018175:A:G:CDH11|
chr16:63691589-65938566_3	chr16:65016870:rs35210:T:G	-5.57729	0.292424	0.154839	Exon|	gene;var:CDH11|	16:65016870:T:G:CDH11|
chr16:63691589-65938566_3	chr16:65021544:rs35200:A:C	-5.57643	0.0948795	0.154745		gene;var:CDH11|
chr16:63691589-65938566_3	chr16:65055144:rs257337:A:C	-5.57285	0.0948186	0.154639		gene;var:CDH11|
chr16:63691589-65938566_3	chr16:65016884:rs35209:T:C	-5.56537	0.291918	0.154508	Exon|	gene;var:CDH11|	16:65016884:T:C:CDH11|
chr16:63691589-65938566_3	chr16:65014909:rs40115:T:C	-5.55207	0.0945951	0.154202		gene;var:CDH11|
chr16:63691589-65938566_3	chr16:65015491:rs35216:T:G	-5.54907	0.291372	0.154142	Exon|	gene;var:CDH11|	16:65015491:T:G:CDH11|
chr16:63691589-65938566_3	chr16:65014865:rs40116:T:C	-5.54761	0.0945466	0.154114		gene;var:CDH11|
chr16:63691589-65938566_3	chr16:65041770:rs35178:A:G	-5.52388	0.0941178	0.153442		gene;var:CDH11|
chr16:63691589-65938566_3	chr16:65041588:rs35179:A:C	-5.49406	0.0940012	0.153206		gene;var:CDH11|
chr16:63691589-65938566_3	chr16:65041337:rs35180:A:G	-5.49147	0.093999	0.153198		gene;var:CDH11|
chr16:63691589-65938566_3	chr16:64983881:rs35146:T:C	-5.50958	0.0939626	0.153165		gene;var:CDH11|
chr16:63691589-65938566_3	chr16:65074595:rs12935145:A:C	-5.47533	0.0925537	0.15084		gene;var:CDH11|
chr16:63691589-65938566_3	chr16:65075704:rs1874459:C:G	-5.47211	0.197348	0.150788	peak|	gene;var:CDH11|	16:65075704:C:G:CDH11|
chr17:1928731-3702312_2	chr17:2176181:rs7223161:A:G	-5.94978	0.0638018	0.0838424		gene;var:SMG6|
chr17:1928731-3702312_2	chr17:2175768:rs9910849:T:C	-5.9291	0.0622626	0.081882		gene;var:SMG6|
chr17:1928731-3702312_2	chr17:2044789:rs7211019:A:G	-5.50806	0.0643225	0.0816807		gene;var:SMG6|
chr17:1928731-3702312_2	chr17:2030507:rs2641431:C:G	-5.63774	0.0618418	0.0787798		gene;var:SMG6|
chr17:1928731-3702312_2	chr17:2069179:rs56209296:A:G	-5.56154	0.0604801	0.077456		gene;var:SMG6|
chr17:1928731-3702312_2	chr17:2047670:rs9902945:T:C	-5.45389	0.0599186	0.076357		gene;var:SMG6|
chr17:1928731-3702312_2	chr17:2192839:rs12103726:T:C	-5.93248	0.0569215	0.0752309		gene;var:SMG6|
chr17:1928731-3702312_2	chr17:2139654:rs2273984:C:G	-5.99903	0.173485	0.0741861	Promoter|	gene;var:SMG6|
chr17:1928731-3702312_2	chr17:2095954:rs1563966:A:G	-6.12016	0.0956676	0.0599816	peak|	gene;var:SMG6|
chr17:1928731-3702312_2	chr17:2196150:rs216205:T:C	-5.72654	0.0449354	0.0598314		gene;var:SMG6|
chr17:1928731-3702312_2	chr17:2066150:rs11869619:C:G	-6.01204	0.0440605	0.0595698		gene;var:SMG6|
chr17:1928731-3702312_2	chr17:2125131:rs1231208:A:G	-5.53632	0.0449747	0.0595411		gene;var:SMG6|
chr17:1928731-3702312_2	chr17:2146586:rs4790318:C:G	-5.63417	0.0900111	0.0547031	peak|	gene;var:SMG6|
chr17:1928731-3702312_2	chr17:2071097:rs9900587:A:G	-6.001	0.0367965	0.0498716		gene;var:SMG6|
chr17:1928731-3702312_2	chr17:2157774:rs12943566:A:G	-6.26109	0.0362012	0.0497901		gene;var:SMG6|
chr17:1928731-3702312_2	chr17:2199846:rs216200:T:C	-6.25255	0.0360245	0.0495197		gene;var:SMG6|
chr17:1928731-3702312_2	chr17:2158094:rs4790070:C:G	-5.49541	0.0368399	0.0493918		gene;var:SMG6|
chr17:1928731-3702312_2	chr17:2201944:rs216197:A:G	-6.29495	0.0356566	0.0490345		gene;var:SMG6|
chr17:1928731-3702312_2	chr17:2191428:rs395566:T:C	-6.2946	0.0356465	0.0490206		gene;var:SMG6|
chr17:1928731-3702312_2	chr17:2160581:rs35691028:T:C	-6.26818	0.0781664	0.0487494	peak|	gene;var:SMG6|
chr17:1928731-3702312_2	chr17:2197502:rs170044:C:G	-6.27916	0.0352119	0.0484241		gene;var:SMG6|
chr17:1928731-3702312_2	chr17:2073272:rs58187837:C:G	-5.96349	0.0356782	0.0483902		gene;var:SMG6|
chr17:1928731-3702312_2	chr17:2074303:rs1565764:A:G	-5.95809	0.0353516	0.0479807		gene;var:SMG6|
chr17:1928731-3702312_2	chr17:2209888:rs4548913:A:G	-5.89824	0.0349281	0.0479576		gene;var:SRR|
chr17:1928731-3702312_2	chr17:2061101:rs7219693:A:C	-6.09652	0.0349603	0.0478944		gene;var:SMG6|
chr17:1928731-3702312_2	chr17:2036162:rs2641443:A:G	-5.93336	0.077605	0.0476491	peak|	gene;var:SMG6|
chr17:1928731-3702312_2	chr17:2055300:rs1565763:T:C	-5.91058	0.0349956	0.0474019		gene;var:SMG6|
chr17:1928731-3702312_2	chr17:2063117:rs8070272:A:G	-6.05756	0.0345264	0.0473292		gene;var:SMG6|
chr17:1928731-3702312_2	chr17:2196088:rs216206:T:C	-6.25477	0.0343883	0.0472879		gene;var:SMG6|
chr17:1928731-3702312_2	chr17:2055109:rs903159:T:C	-5.90479	0.0348384	0.0471946		gene;var:SMG6|
chr17:1928731-3702312_2	chr17:2070698:rs9894215:A:G	-5.93013	0.0346939	0.0470804		gene;var:SMG6|
chr17:1928731-3702312_2	chr17:2194028:rs452363:T:C	-6.24764	0.0342042	0.0470351		gene;var:SMG6|
chr17:1928731-3702312_2	chr17:2133205:rs9896535:T:C	-6.25465	0.034351	0.0470123		gene;var:SMG6|
chr17:1928731-3702312_2	chr17:2168509:rs216176:C:G	-6.24678	0.115446	0.0470048	Promoter|	gene;var:SMG6|
chr17:1928731-3702312_2	chr17:2129210:rs9906500:A:C	-6.28413	0.0342499	0.0468716		gene;var:SMG6|
chr17:1928731-3702312_2	chr17:2040963:rs4349181:A:G	-5.92468	0.076331	0.0468648	peak|	gene;var:SMG6|
chr17:1928731-3702312_2	chr17:2025544:rs2172593:C:G	-5.91131	0.0763143	0.0468623	peak|	gene;var:SMG6|
chr17:1928731-3702312_2	chr17:2025458:rs2131702:T:C	-5.91107	0.0763004	0.0468539	peak|	gene;var:SMG6|
chr17:1928731-3702312_2	chr17:2162049:rs422632:A:G	-6.21736	0.0340319	0.0468281		gene;var:SMG6|
chr17:1928731-3702312_2	chr17:2071058:rs9894613:T:C	-6.0515	0.0341794	0.0468203		gene;var:SMG6|
chr17:1928731-3702312_2	chr17:2041369:rs9889861:A:G	-5.90428	0.034412	0.0466188		gene;var:SMG6|
chr17:1928731-3702312_2	chr17:2043818:rs8077597:T:C	-5.90298	0.0343781	0.0465742		gene;var:SMG6|
chr17:1928731-3702312_2	chr17:2147291:rs216219:T:C	-6.23153	0.191655	0.0465625	CRE|peak|	gene;var:SMG6|cre:OVCA2|
chr17:1928731-3702312_2	chr17:2189324:rs11078024:T:C	-6.22981	0.0337555	0.046419		gene;var:SMG6|
chr17:1928731-3702312_2	chr17:2190318:rs410378:T:C	-6.22911	0.0337382	0.0463952		gene;var:SMG6|
chr17:1928731-3702312_2	chr17:2157925:rs7406247:A:G	-6.20813	0.0337054	0.046344		gene;var:SMG6|
chr17:1928731-3702312_2	chr17:2025360:rs2131703:T:G	-5.89561	0.0754299	0.0463236	peak|	gene;var:SMG6|
chr17:1928731-3702312_2	chr17:2159982:rs12450354:T:C	-6.20716	0.0743347	0.0463115	peak|	gene;var:SMG6|
chr17:1928731-3702312_2	chr17:2160214:rs12453323:T:C	-6.20713	0.033681	0.0463105		gene;var:SMG6|
chr17:1928731-3702312_2	chr17:2069003:rs9906467:T:C	-5.90312	0.0341193	0.0463018		gene;var:SMG6|
chr17:1928731-3702312_2	chr17:2015612:rs2641436:T:C	-5.67685	0.0342081	0.0462337		gene;var:SMG6|
chr17:1928731-3702312_2	chr17:2155948:rs216223:T:C	-6.20279	0.0335749	0.0461649		gene;var:SMG6|
chr17:1928731-3702312_2	chr17:2191000:rs404392:A:G	-6.22176	0.0335585	0.0461483		gene;var:SMG6|
chr17:1928731-3702312_2	chr17:2198800:rs216201:T:C	-6.221	0.0335399	0.0461228		gene;var:SMG6|
chr17:1928731-3702312_2	chr17:2199754:rs375245:A:G	-6.221	0.0335399	0.0461228		gene;var:SMG6|
chr17:1928731-3702312_2	chr17:2197387:rs216202:T:C	-6.22055	0.0335292	0.0461081		gene;var:SMG6|
chr17:1928731-3702312_2	chr17:2199749:rs394752:A:C	-6.22046	0.0335269	0.0461049		gene;var:SMG6|
chr17:1928731-3702312_2	chr17:2191681:rs1675698:A:C	-6.21929	0.0334987	0.0460661		gene;var:SMG6|
chr17:1928731-3702312_2	chr17:2197637:rs177567:T:C	-6.21904	0.0334926	0.0460578		gene;var:SMG6|
chr17:1928731-3702312_2	chr17:2197185:rs12949991:A:G	-6.21097	0.0334819	0.046048		gene;var:SMG6|
chr17:1928731-3702312_2	chr17:2134214:rs216212:T:C	-6.15167	0.0740895	0.0460406	peak|	gene;var:SMG6|
chr17:1928731-3702312_2	chr17:2196659:rs216204:A:G	-6.21832	0.0334752	0.046034		gene;var:SMG6|
chr17:1928731-3702312_2	chr17:2160854:rs12938295:A:G	-6.21714	0.0738262	0.0459948	peak|	gene;var:SMG6|
chr17:1928731-3702312_2	chr17:2039733:rs9909515:T:C	-5.8839	0.0338915	0.0459332		gene;var:SMG6|
chr17:1928731-3702312_2	chr17:2063550:rs9899427:A:T	-6.03649	0.0334953	0.0459081		gene;var:SMG6|
chr17:1928731-3702312_2	chr17:2156910:rs12950555:C:G	-6.19461	0.0333776	0.045894		gene;var:SMG6|
chr17:1928731-3702312_2	chr17:2156917:rs9899193:A:G	-6.19461	0.0333776	0.045894		gene;var:SMG6|
chr17:1928731-3702312_2	chr17:2045375:rs9907384:A:C	-5.88304	0.0338061	0.0458433		gene;var:SMG6|
chr17:1928731-3702312_2	chr17:2190767:rs441750:T:C	-6.20975	0.0332704	0.0457525		gene;var:SMG6|
chr17:1928731-3702312_2	chr17:2196905:rs170045:A:G	-6.20945	0.0332634	0.0457429		gene;var:SMG6|
chr17:1928731-3702312_2	chr17:2050445:rs9913789:C:G	-5.87272	0.0336725	0.0456502		gene;var:SMG6|
chr17:1928731-3702312_2	chr17:2196826:rs216203:T:C	-6.20508	0.0331604	0.0456014		gene;var:SMG6|
chr17:1928731-3702312_2	chr17:2131773:rs7219004:A:G	-6.17756	0.0332423	0.0455612		gene;var:SMG6|
chr17:1928731-3702312_2	chr17:2145090:rs216217:A:G	-6.18603	0.0331099	0.0455212		gene;var:SMG6|
chr17:1928731-3702312_2	chr17:2191260:rs403553:A:G	-6.19807	0.0329973	0.0453774		gene;var:SMG6|
chr17:1928731-3702312_2	chr17:2130592:rs4790887:A:C	-6.17009	0.0330673	0.0453232		gene;var:SMG6|
chr17:1928731-3702312_2	chr17:2044645:rs7503141:T:C	-5.86461	0.0334184	0.0453101		gene;var:SMG6|
chr17:1928731-3702312_2	chr17:2063612:rs9916322:T:C	-6.01689	0.0329631	0.0451791		gene;var:SMG6|
chr17:1928731-3702312_2	chr17:2063714:rs9906705:T:G	-6.01689	0.0329631	0.0451791		gene;var:SMG6|
chr17:1928731-3702312_2	chr17:2145329:rs216218:A:G	-6.19119	0.0725115	0.0451608	peak|	gene;var:SMG6|
chr17:1928731-3702312_2	chr17:2168840:rs216178:T:C	-6.18946	0.110955	0.0451067	Promoter|	gene;var:SMG6|
chr17:1928731-3702312_2	chr17:2126003:rs9893573:A:G	-6.15622	0.0328959	0.0450947		gene;var:SMG6|
chr17:1928731-3702312_2	chr17:2168878:rs216179:A:T	-6.18886	0.110911	0.045088	Promoter|	gene;var:SMG6|
chr17:1928731-3702312_2	chr17:2047214:rs9303251:T:C	-5.85293	0.0331964	0.0450229		gene;var:SMG6|
chr17:1928731-3702312_2	chr17:2042393:rs7212589:A:G	-5.85504	0.0331909	0.0450105		gene;var:SMG6|
chr17:1928731-3702312_2	chr17:2062591:rs9912385:T:G	-6.00742	0.0327471	0.0448852		gene;var:SMG6|
chr17:1928731-3702312_2	chr17:2136065:rs7217226:T:G	-6.12613	0.0326759	0.0448016		gene;var:SMG6|
chr17:1928731-3702312_2	chr17:2134225:rs216213:A:G	-6.11016	0.0719972	0.0447235	peak|	gene;var:SMG6|
chr17:1928731-3702312_2	chr17:2036653:rs2760736:A:G	-5.8444	0.0329432	0.0446844		gene;var:SMG6|
chr17:1928731-3702312_2	chr17:2060353:rs8068642:T:C	-5.99635	0.032605	0.0446652		gene;var:SMG6|
chr17:1928731-3702312_2	chr17:2035071:rs2641442:T:C	-5.84264	0.0329028	0.0446311		gene;var:SMG6|
chr17:1928731-3702312_2	chr17:2096441:rs2169357:T:C	-6.23956	0.0325935	0.0446131		gene;var:SMG6|
chr17:1928731-3702312_2	chr17:2155430:rs216221:A:G	-6.15219	0.0324081	0.0445623		gene;var:SMG6|
chr17:1928731-3702312_2	chr17:2052704:rs6503302:T:C	-5.82645	0.0328355	0.0445493		gene;var:SMG6|
chr17:1928731-3702312_2	chr17:2034806:rs2760746:C:G	-5.83778	0.032792	0.0444853		gene;var:SMG6|
chr17:1928731-3702312_2	chr17:2036835:rs2760735:A:G	-5.83681	0.0327699	0.0444562		gene;var:SMG6|
chr17:1928731-3702312_2	chr17:2037402:rs2641444:T:C	-5.83653	0.0327635	0.0444478		gene;var:SMG6|
chr17:1928731-3702312_2	chr17:2135980:rs7212249:A:T	-6.11316	0.032389	0.044411		gene;var:SMG6|
chr17:1928731-3702312_2	chr17:2061334:rs7208638:C:G	-5.9912	0.114564	0.0443956	DAR|peak|	gene;var:SMG6|
chr17:1928731-3702312_2	chr17:2070529:rs4790315:T:C	-5.97163	0.032384	0.0443656		gene;var:SMG6|
chr17:1928731-3702312_2	chr17:2030155:rs2984942:T:C	-5.83026	0.0326752	0.0443364		gene;var:SMG6|
chr17:1928731-3702312_2	chr17:2074977:rs4790316:T:C	-5.97211	0.114312	0.0442897	DAR|peak|	gene;var:SMG6|
chr17:1928731-3702312_2	chr17:2155343:rs8082546:A:G	-6.13511	0.0321746	0.0442458		gene;var:SMG6|
chr17:1928731-3702312_2	chr17:2186455:rs216188:A:G	-6.14632	0.0321739	0.0442433		gene;var:SMG6|
chr17:1928731-3702312_2	chr17:2035591:rs2760745:T:C	-5.82828	0.0325786	0.0442043		gene;var:SMG6|
chr17:1928731-3702312_2	chr17:2188639:rs216191:T:C	-6.14134	0.0321291	0.044181		gene;var:SMG6|
chr17:1928731-3702312_2	chr17:2187457:rs216190:T:C	-6.1441	0.0321266	0.0441783		gene;var:SMG6|
chr17:1928731-3702312_2	chr17:2121566:rs9897160:A:G	-6.13182	0.032213	0.0441609		gene;var:SMG6|
chr17:1928731-3702312_2	chr17:2126504:rs216172:C:G	-6.11614	0.071082	0.0441159	peak|	gene;var:SMG6|
chr17:1928731-3702312_2	chr17:2148821:rs216220:T:G	-6.15597	0.0320676	0.0440996		gene;var:SMG6|
chr17:1928731-3702312_2	chr17:2027182:rs2641440:C:G	-5.82231	0.114766	0.0440305	DAR|peak|	gene;var:SMG6|
chr17:1928731-3702312_2	chr17:2100512:rs6503324:A:G	-6.1588	0.0320708	0.0439612		gene;var:SMG6|
chr17:1928731-3702312_2	chr17:2121745:rs9897624:A:G	-6.12473	0.0320623	0.0439558		gene;var:SMG6|
chr17:1928731-3702312_2	chr17:2047624:rs8068508:A:G	-5.81827	0.0323583	0.0439142		gene;var:SMG6|
chr17:1928731-3702312_2	chr17:2187401:rs216189:A:G	-6.13272	0.031888	0.0438504		gene;var:SMG6|
chr17:1928731-3702312_2	chr17:2132324:rs143499:T:C	-6.11943	0.0319513	0.0438048		gene;var:SMG6|
chr17:1928731-3702312_2	chr17:2187931:rs8074850:A:C	-6.1229	0.0318143	0.0437532		gene;var:SMG6|
chr17:1928731-3702312_2	chr17:2165340:rs7213232:A:G	-6.14262	0.0317901	0.0437181		gene;var:SMG6|
chr17:1928731-3702312_2	chr17:2059569:rs7213346:A:C	-5.96022	0.0705031	0.0437115	peak|	gene;var:SMG6|
chr17:1928731-3702312_2	chr17:2060407:rs8082485:A:G	-5.95944	0.031897	0.0436896		gene;var:SMG6|
chr17:1928731-3702312_2	chr17:2192085:rs4790325:T:C	-6.13945	0.0317253	0.0436289		gene;var:SMG6|
chr17:1928731-3702312_2	chr17:2191960:rs432200:A:G	-6.10766	0.0316947	0.0435495		gene;var:SMG6|
chr17:1928731-3702312_2	chr17:2168772:rs9897772:A:C	-6.13114	0.106905	0.0433988	Promoter|	gene;var:SMG6|
chr17:1928731-3702312_2	chr17:2172416:rs216180:C:G	-6.12814	0.0314982	0.0433167		gene;var:SMG6|
chr17:1928731-3702312_2	chr17:2175210:rs11657644:C:G	-6.12055	0.0314721	0.0432847		gene;var:SMG6|
chr17:1928731-3702312_2	chr17:2031507:rs923864:T:C	-5.79567	0.0318782	0.0432823		gene;var:SMG6|
chr17:1928731-3702312_2	chr17:2029559:rs2476355:A:G	-5.79481	0.0318603	0.0432589		gene;var:SMG6|
chr17:1928731-3702312_2	chr17:2099931:rs8076939:A:C	-6.13329	0.0315473	0.0432492		gene;var:SMG6|
chr17:1928731-3702312_2	chr17:2173923:rs216183:A:G	-6.12494	0.0694653	0.0432294	peak|	gene;var:SMG6|
chr17:1928731-3702312_2	chr17:2123200:rs12602764:A:T	-6.09593	0.0314739	0.0431552		gene;var:SMG6|
chr17:1928731-3702312_2	chr17:2031382:rs923862:A:C	-5.79054	0.0317725	0.0431433		gene;var:SMG6|
chr17:1928731-3702312_2	chr17:2031387:rs923863:A:G	-5.79054	0.0317725	0.0431433		gene;var:SMG6|
chr17:1928731-3702312_2	chr17:2176528:rs11872068:A:G	-6.10071	0.0313695	0.0431414		gene;var:SMG6|
chr17:1928731-3702312_2	chr17:2030135:rs2984943:T:C	-5.7903	0.0317676	0.0431369		gene;var:SMG6|
chr17:1928731-3702312_2	chr17:2077493:rs9906968:C:G	-5.9448	0.0692549	0.0429832	peak|	gene;var:SMG6|
chr17:1928731-3702312_2	chr17:2161633:rs9909895:A:G	-6.11169	0.0311777	0.0428758		gene;var:SMG6|
chr17:1928731-3702312_2	chr17:2180823:rs8065650:T:C	-6.09667	0.0311707	0.042864		gene;var:SMG6|
chr17:1928731-3702312_2	chr17:2101134:rs9900379:A:G	-6.1136	0.0311629	0.0427263		gene;var:SMG6|
chr17:1928731-3702312_2	chr17:2017079:rs2760743:A:C	-5.90615	0.0312122	0.0427211		gene;var:SMG6|
chr17:1928731-3702312_2	chr17:2180709:rs7405464:C:G	-6.09002	0.0310444	0.0426903		gene;var:SMG6|
chr17:1928731-3702312_2	chr17:2124972:rs1231209:A:G	-6.06507	0.0310265	0.0425622		gene;var:SMG6|
chr17:1928731-3702312_2	chr17:2164210:rs9893527:A:C	-6.09505	0.0308654	0.0424461		gene;var:SMG6|
chr17:1928731-3702312_2	chr17:2031543:rs2984941:A:G	-5.89189	0.0309423	0.0423563		gene;var:SMG6|
chr17:1928731-3702312_2	chr17:2085653:rs7223390:T:C	-5.92033	0.0682466	0.0423503	peak|	gene;var:SMG6|
chr17:1928731-3702312_2	chr17:2017029:rs2760744:T:C	-5.88983	0.030904	0.0423044		gene;var:SMG6|
chr17:1928731-3702312_2	chr17:2181591:rs4790322:A:G	-6.07293	0.0307288	0.0422562		gene;var:SMG6|
chr17:1928731-3702312_2	chr17:2180968:rs8066372:A:G	-6.07191	0.0307104	0.0422308		gene;var:SMG6|
chr17:1928731-3702312_2	chr17:2076352:rs9898819:A:G	-5.89699	0.0307817	0.0422204		gene;var:SMG6|
chr17:1928731-3702312_2	chr17:2176209:rs7223296:C:G	-6.06914	0.0306966	0.0422117		gene;var:SMG6|
chr17:1928731-3702312_2	chr17:2177732:rs9905529:T:C	-6.07089	0.0306921	0.0422057		gene;var:SMG6|
chr17:1928731-3702312_2	chr17:2171197:rs1984664:A:C	-6.07772	0.0306641	0.0421729		gene;var:SMG6|
chr17:1928731-3702312_2	chr17:2186100:rs749240:T:C	-6.06939	0.10151	0.0421683	Exon|	gene;var:SMG6|
chr17:1928731-3702312_2	chr17:2091308:rs11078855:T:C	-5.86879	0.0678561	0.0421674	peak|	gene;var:SMG6|
chr17:1928731-3702312_2	chr17:2085185:rs898749:A:G	-5.90914	0.108717	0.0420723	DAR|peak|	gene;var:SMG6|
chr17:1928731-3702312_2	chr17:2143460:rs10852932:T:G	-6.06703	0.0675974	0.0420583	peak|	gene;var:SMG6|
chr17:1928731-3702312_2	chr17:2176705:rs6502154:A:G	-6.06397	0.0305683	0.0420354		gene;var:SMG6|
chr17:1928731-3702312_2	chr17:2085598:rs7214741:A:G	-5.90704	0.0677219	0.042021	peak|	gene;var:SMG6|
chr17:1928731-3702312_2	chr17:2125605:rs1231206:A:G	-6.05139	0.030635	0.0420133		gene;var:SMG6|
chr17:1928731-3702312_2	chr17:2084565:rs9892754:T:G	-5.90619	0.0306165	0.0420003		gene;var:SMG6|
chr17:1928731-3702312_2	chr17:2176964:rs6502155:A:G	-6.05861	0.0304738	0.0419053		gene;var:SMG6|
chr17:1928731-3702312_2	chr17:2083881:rs1994883:A:T	-5.8991	0.0304906	0.0418287		gene;var:SMG6|
chr17:1928731-3702312_2	chr17:2023081:rs7220358:A:G	-5.86882	0.0305238	0.0417904		gene;var:SMG6|
chr17:1928731-3702312_2	chr17:2084305:rs7212342:A:G	-5.89359	0.0672064	0.0416976	peak|	gene;var:SMG6|
chr17:1928731-3702312_2	chr17:2173184:rs4790071:A:G	-6.07254	0.0303158	0.0416737		gene;var:SMG6|
chr17:1928731-3702312_2	chr17:2024647:rs2760737:T:C	-5.86387	0.0304368	0.0416728		gene;var:SMG6|
chr17:1928731-3702312_2	chr17:2024030:rs2957926:T:C	-5.86358	0.0304316	0.0416659		gene;var:SMG6|
chr17:1928731-3702312_2	chr17:2184555:rs8077545:A:G	-6.04664	0.0302669	0.0416205		gene;var:SMG6|
chr17:1928731-3702312_2	chr17:2102453:rs9908888:C:G	-6.06839	0.0303414	0.0416199		gene;var:SMG6|
chr17:1928731-3702312_2	chr17:2105299:rs4790884:C:G	-6.05582	0.0303409	0.0416045		gene;var:SMG6|
chr17:1928731-3702312_2	chr17:2024217:rs2760739:T:C	-5.86053	0.0303786	0.0415942		gene;var:SMG6|
chr17:1928731-3702312_2	chr17:2173499:rs4790321:T:C	-6.05606	0.0302309	0.041566		gene;var:SMG6|
chr17:1928731-3702312_2	chr17:2085475:rs898748:T:G	-5.88657	0.0669437	0.0415328	peak|	gene;var:SMG6|
chr17:1928731-3702312_2	chr17:2023965:rs2984939:T:C	-5.85644	0.0303081	0.0414988		gene;var:SMG6|
chr17:1928731-3702312_2	chr17:2173497:rs4790072:A:G	-6.05072	0.030141	0.0414423		gene;var:SMG6|
chr17:1928731-3702312_2	chr17:2081419:rs9910413:A:G	-5.88149	0.0301872	0.0414152		gene;var:SMG6|
chr17:1928731-3702312_2	chr17:2084008:rs1994884:A:G	-5.88136	0.0667517	0.0414124	peak|	gene;var:SMG6|
chr17:1928731-3702312_2	chr17:2081647:rs9895342:T:C	-5.88071	0.0667279	0.0413974	peak|	gene;var:SMG6|
chr17:1928731-3702312_2	chr17:2023825:rs2984940:A:G	-5.84948	0.0301896	0.0413387		gene;var:SMG6|
chr17:1928731-3702312_2	chr17:2088838:rs28505924:C:G	-5.82918	0.0300822	0.0413176		gene;var:SMG6|
chr17:1928731-3702312_2	chr17:2176532:rs11869805:A:G	-6.03274	0.030034	0.0412999		gene;var:SMG6|
chr17:1928731-3702312_2	chr17:2023089:rs7225168:T:G	-5.84515	0.0301169	0.0412403		gene;var:SMG6|
chr17:1928731-3702312_2	chr17:2021490:rs8081921:A:C	-5.83991	0.0300297	0.0411225		gene;var:SMG6|
chr17:1928731-3702312_2	chr17:2170858:rs1122645:A:G	-6.03939	0.0299033	0.0411218		gene;var:SMG6|
chr17:1928731-3702312_2	chr17:2093511:rs7213715:A:T	-5.82378	0.0661794	0.0411094	peak|	gene;var:SMG6|
chr17:1928731-3702312_2	chr17:2108578:rs4790885:A:G	-6.03783	0.0299415	0.0410678		gene;var:SMG6|
chr17:1928731-3702312_2	chr17:2112720:rs62069332:A:G	-6.04191	0.0299008	0.0410089		gene;var:SMG6|
chr17:1928731-3702312_2	chr17:2208899:rs4523957:T:G	-5.71042	0.0298456	0.0409929		gene;var:SRR|
chr17:1928731-3702312_2	chr17:2017786:rs2641438:C:G	-5.83236	0.0299061	0.0409554		gene;var:SMG6|
chr17:1928731-3702312_2	chr17:2020989:rs2760740:T:C	-5.83072	0.0298796	0.0409195		gene;var:SMG6|
chr17:1928731-3702312_2	chr17:2017561:rs2641439:C:G	-5.83026	0.0660717	0.0409097	peak|	gene;var:SMG6|
chr17:1928731-3702312_2	chr17:2119101:rs11655813:T:C	-6.0592	0.105651	0.0408144	DAR|peak|	gene;var:SMG6|
chr17:1928731-3702312_2	chr17:2024600:rs2760738:A:G	-5.82571	0.0297992	0.0408109		gene;var:SMG6|
chr17:1928731-3702312_2	chr17:2090507:rs11867782:T:G	-5.80575	0.0656069	0.0407338	peak|	gene;var:SMG6|
chr17:1928731-3702312_2	chr17:2112567:rs12603057:T:C	-6.09002	0.0296158	0.0405851		gene;var:SMG6|
chr17:1928731-3702312_2	chr17:2138016:rs2169356:A:T	-6.01881	0.0295365	0.0405231		gene;var:SMG6|
chr17:1928731-3702312_2	chr17:2019037:rs2760742:A:G	-5.80796	0.0295218	0.0404359		gene;var:SMG6|
chr17:1928731-3702312_2	chr17:2020443:rs2760741:T:C	-5.80616	0.0294945	0.040399		gene;var:SMG6|
chr17:1928731-3702312_2	chr17:2117945:rs2281727:A:G	-6.00871	0.029384	0.0403154		gene;var:SMG6|
chr17:1928731-3702312_2	chr17:2112431:rs12601834:T:C	-5.9983	0.0292317	0.0400983		gene;var:SMG6|
chr17:1928731-3702312_2	chr17:2115922:rs9895551:C:G	-5.97577	0.102714	0.0396655	DAR|peak|	gene;var:SMG6|
chr17:1928731-3702312_2	chr17:2059408:rs7217108:C:G	-5.75345	0.0637062	0.0394428	peak|	gene;var:SMG6|
chr17:1928731-3702312_2	chr17:2203453:rs216193:A:G	-5.6729	0.0934145	0.0387721	Exon|	gene;var:SMG6|
chr17:1928731-3702312_2	chr17:2030234:rs8067895:A:G	-5.56691	0.0284151	0.0387433		gene;var:SMG6|
chr17:1928731-3702312_2	chr17:2059385:rs7220685:A:G	-5.70375	0.062267	0.038547	peak|	gene;var:SMG6|
chr17:1928731-3702312_4	chr17:2048611:rs6503293:A:G	-5.56597	0.0281905	0.0384447		gene;var:SMG6|
chr1:7247335-9365199_3	chr1:8495590:rs172531:A:G	5.61861	0.222604	0.414606		gene;var:RERE|
chr1:7247335-9365199_3	chr1:8495945:rs301801:T:C	5.61514	0.615995	0.413685	DAR|peak|	gene;var:RERE|	1:8495945:T:C:RERE|
chr1:7247335-9365199_3	chr1:8436802:rs6678140:T:C	5.6011	0.433409	0.410359	peak|	gene;var:SLC45A1|
chr1:7247335-9365199_3	chr1:8490320:rs302719:T:G	5.59795	0.219416	0.409401		gene;var:RERE|
chr1:7247335-9365199_3	chr1:8486131:rs302714:A:C	5.58808	0.21799	0.406959		gene;var:RERE|
chr1:7247335-9365199_3	chr1:8473331:rs1763838:A:G	5.58679	0.217951	0.406854		gene;var:RERE|
chr1:7247335-9365199_3	chr1:8473336:rs1763839:A:G	5.58088	0.217175	0.40559		gene;var:RERE|
chr1:7247335-9365199_3	chr1:8484228:rs159961:T:C	5.57857	0.587554	0.404969	Promoter|peak|	gene;var:RERE|	1:8484228:T:C:RERE|
chr1:7247335-9365199_3	chr1:8469284:rs301790:C:G	5.57154	0.426435	0.4036	peak|	gene;var:RERE|	1:8469284:C:G:RERE|
chr1:7247335-9365199_3	chr1:8467353:rs301795:A:G	5.56089	0.42436	0.401609	peak|	gene;var:RERE|	1:8467353:A:G:RERE|
chr1:7247335-9365199_2	chr1:8468372:rs301791:A:T	5.56063	0.601352	0.401562	DAR|peak|	gene;var:RERE|	1:8468372:A:T:RERE|
chr1:7247335-9365199_3	chr1:8466730:rs301796:T:C	5.54931	0.213513	0.399608		gene;var:RERE|
chr1:7247335-9365199_3	chr1:8486341:rs301808:C:G	5.54302	0.421152	0.398558	peak|	gene;var:RERE|	1:8486341:C:G:RERE|
chr1:7247335-9365199_3	chr1:8469337:rs301789:A:G	5.54068	0.420836	0.398224	peak|	gene;var:RERE|	1:8469337:A:G:RERE|
chr1:7247335-9365199_3	chr1:8487323:rs301797:A:C	5.53194	0.789113	0.39688	CRE|peak|	gene;var:RERE|cre:SLC45A1|	1:8487323:A:C:RERE|
chr1:7247335-9365199_3	chr1:8488565:rs301798:A:G	5.51479	0.210246	0.394408		gene;var:RERE|
chr1:7247335-9365199_3	chr1:8468278:rs301792:A:G	5.47339	0.587505	0.39022	DAR|peak|	gene;var:RERE|	1:8468278:A:G:RERE|
chr1:7247335-9365199_3	chr1:8439625:rs2708633:A:C	5.47529	0.207635	0.390032		gene;var:RERE|
chr1:7247335-9365199_3	chr1:8498680:rs301803:A:T	5.47602	0.207537	0.389973		gene;var:RERE|
chr1:7247335-9365199_3	chr1:8490983:rs159962:T:C	5.45443	0.206404	0.388144		gene;var:RERE|
chr17:43056905-45876022_1	chr17:44025888:rs242559:A:C	6.12987	0.756429	0.666582	peak|	gene;var:STH|
chr17:43056905-45876022_2	chr17:45612906:rs35794672:A:G	5.72654	0.363081	0.55303		gene;var:NPEPPS|
chr17:43056905-45876022_5	chr17:44087500:rs41543317:A:G	-6.00571	0.431345	0.441742	peak|	gene;var:STH|
chr17:43056905-45876022_3	chr17:44947757:rs61619946:T:C	-5.67217	0.398459	0.429688		gene;var:WNT9B|
chr17:43056905-45876022_3	chr17:44947756:rs60372268:A:G	-5.65417	0.375737	0.407774		gene;var:WNT9B|
chr17:43056905-45876022_3	chr17:44947821:rs57986961:A:G	-5.6729	0.359325	0.392298		gene;var:WNT9B|
chr17:43056905-45876022_2	chr17:45786452:rs4794057:T:C	5.63774	0.62381	0.316337	Exon|peak|	gene;var:TBKBP1|	17:45786452:T:C:TBKBP1|
chr17:43056905-45876022_4	chr17:45329682:rs2317385:A:G	-5.61807	0.193431	0.273083		gene;var:ITGB3|
chr17:43056905-45876022_2	chr17:45701731:rs7223029:T:C	5.56805	0.165712	0.254933		gene;var:NPEPPS|
chr17:43056905-45876022_4	chr17:45330759:rs7208170:A:G	-5.56331	0.516061	0.242755	Promoter|	gene;var:ITGB3|
chr17:43056905-45876022_2	chr17:45580138:rs140734195:T:C	5.67072	0.156045	0.242727		gene;var:MRPL45P2|
chr17:43056905-45876022_4	chr17:45328718:rs2037150:A:G	-5.56187	0.168614	0.242048		gene;var:ITGB3|
chr17:43056905-45876022_4	chr17:45330066:rs3809861:A:G	-5.5618	0.168589	0.242016		gene;var:ITGB3|
chr17:43056905-45876022_4	chr17:45329770:rs2317384:A:G	-5.55831	0.16724	0.240325		gene;var:ITGB3|
chr17:43056905-45876022_4	chr17:45328029:rs67544603:A:G	-5.53969	0.160395	0.231733		gene;var:ITGB3|
chr17:43056905-45876022_4	chr17:45328041:rs35125273:A:G	-5.53592	0.159075	0.230074		gene;var:ITGB3|
chr17:43056905-45876022_1	chr17:43804317:rs9897399:A:G	5.88324	0.133236	0.227223		gene;var:CRHR1|
chr17:43056905-45876022_5	chr17:44098797:rs916896:T:C	-5.85483	0.263333	0.225121	peak|	gene;var:KANSL1|	17:44098797:T:C:KANSL1|
chr17:43056905-45876022_1	chr17:44026548:rs242561:T:C	5.85313	0.262972	0.208646	peak|	gene;var:STH|
chr17:43056905-45876022_1	chr17:43756969:rs1635288:A:G	5.75366	0.114941	0.190045		gene;var:LINC02210|
chr17:43056905-45876022_1	chr17:44773783:rs199441:A:G	5.65616	0.110756	0.173538		gene;var:NSF|
chr17:43056905-45876022_5	chr17:44105395:rs7521:A:G	-5.67229	0.32947	0.169957	3_UTR|	gene;var:KANSL1|	17:44105395:A:G:KANSL1|
chr17:43056905-45876022_5	chr17:44119051:rs7213077:T:C	-5.5545	0.293364	0.154875	Promoter|peak|	gene;var:KANSL1|	17:44119051:T:C:KANSL1|
chr17:43056905-45876022_5	chr17:44116843:rs16940845:A:C	-5.58702	0.0908547	0.153249		gene;var:KANSL1|
chr17:43056905-45876022_5	chr17:44140748:rs6503455:T:C	-5.58418	0.0906619	0.152883		gene;var:KANSL1|
chr17:43056905-45876022_5	chr17:44131096:rs11654745:A:G	-5.55934	0.0898139	0.150962		gene;var:KANSL1|
chr17:43056905-45876022_5	chr17:44125466:rs8078067:A:G	-5.54202	0.0891965	0.149415		gene;var:KANSL1|
chr17:43056905-45876022_5	chr17:44119987:rs10514899:C:G	-5.53328	0.282933	0.14848	Promoter|	gene;var:KANSL1|	17:44119987:C:G:KANSL1|
chr17:43056905-45876022_5	chr17:44109474:rs7220988:A:G	-5.54208	0.275082	0.148078	Exon|peak|	gene;var:KANSL1|	17:44109474:A:G:KANSL1|
chr17:43056905-45876022_5	chr17:44172812:rs60521849:A:G	-5.64634	0.0857493	0.143031		gene;var:KANSL1|
chr17:43056905-45876022_5	chr17:44119367:rs8064986:A:G	-5.4712	0.284164	0.140088	Promoter|peak|	gene;var:KANSL1|	17:44119367:A:G:KANSL1|
chr17:43056905-45876022_5	chr17:44161581:rs11079732:T:C	-5.46313	0.0885828	0.139333		gene;var:KANSL1|
chr17:43056905-45876022_5	chr17:44189270:rs56807059:A:C	-5.61235	0.0824056	0.138013		gene;var:KANSL1|
chr17:43056905-45876022_5	chr17:44247017:rs560699746:A:C	-5.64644	0.178286	0.138002	peak|	gene;var:KANSL1|	17:44247017:A:C:KANSL1|
chr17:43056905-45876022_5	chr17:44185479:rs8070420:T:G	-5.60934	0.0825986	0.137725		gene;var:KANSL1|
chr17:43056905-45876022_5	chr17:44175489:rs8065825:A:G	-5.5874	0.0827637	0.137592		gene;var:KANSL1|
chr17:43056905-45876022_5	chr17:44186952:rs9904766:T:C	-5.61969	0.0855766	0.135034		gene;var:KANSL1|
chr17:57487512-59312755_2	chr17:59067005:rs111287200:A:C	6.36721	0.692294	0.372992	Promoter|	gene;var:BCAS3|
chr17:57487512-59312755_2	chr17:59108885:rs116872185:T:C	6.37281	0.187451	0.338164		gene;var:BCAS3|
chr17:57487512-59312755_1	chr17:59239221:rs11868441:A:G	6.74907	0.565512	0.319784	CRE|peak|	gene;var:BCAS3|cre:TBX2|cre:TBX2-AS1|
chr17:57487512-59312755_1	chr17:59239149:rs2378816:A:T	6.74713	0.560882	0.316746	CRE|peak|	gene;var:BCAS3|cre:TBX2|cre:TBX2-AS1|
chr17:57487512-59312755_2	chr17:59206412:rs111581093:A:C	6.24485	0.135861	0.230832		gene;var:BCAS3|
chr17:57487512-59312755_1	chr17:59242764:rs8079951:A:T	6.60286	0.0766701	0.215677		gene;var:BCAS3|
chr17:57487512-59312755_2	chr17:59230325:rs113070432:A:G	6.08945	0.0856427	0.138113		gene;var:BCAS3|
chr17:57487512-59312755_1	chr17:59237499:rs2159373:A:G	6.40195	0.047297	0.0863698		gene;var:BCAS3|
chr17:57487512-59312755_1	chr17:59237216:rs2041302:A:G	6.37674	0.102318	0.0815898	peak|	gene;var:BCAS3|
chr17:57487512-59312755_2	chr17:58932209:rs112377773:T:C	5.96636	0.0542626	0.0809432		gene;var:BCAS3|
chr17:57487512-59312755_1	chr17:59237013:rs1476098:A:C	6.26084	0.092974	0.0700749	peak|	gene;var:BCAS3|
chr17:57487512-59312755_1	chr17:59236766:rs1476099:A:G	6.23058	0.0425811	0.066709		gene;var:BCAS3|
chr17:57487512-59312755_1	chr17:59241768:rs8073611:A:C	5.72621	0.0623566	0.0632846		gene;var:BCAS3|
chr17:57487512-59312755_1	chr17:59239754:rs11079418:T:G	5.75879	0.059644	0.0612717		gene;var:BCAS3|
chr17:57487512-59312755_1	chr17:59244101:rs4968534:A:C	6.00967	0.106756	0.0583209	peak|	gene;var:BCAS3|
chr17:57487512-59312755_1	chr17:59236155:rs8075455:T:G	5.89394	0.048621	0.0559579		gene;var:BCAS3|
chr17:57487512-59312755_1	chr17:59240473:rs6504021:T:C	5.96942	0.0439562	0.0558668		gene;var:BCAS3|
chr17:57487512-59312755_1	chr17:59240651:rs8068584:T:G	5.89389	0.0459268	0.0553457		gene;var:BCAS3|
chr17:57487512-59312755_1	chr17:59243878:rs4968532:A:C	5.88611	0.100092	0.0550049	peak|	gene;var:BCAS3|
chr17:57487512-59312755_1	chr17:59244051:rs4968533:A:G	5.80596	0.0991991	0.0546456	peak|	gene;var:BCAS3|
chr17:57487512-59312755_1	chr17:59222069:rs983817:T:C	6.10101	0.0375708	0.0535172		gene;var:BCAS3|
chr17:57487512-59312755_1	chr17:59232365:rs11655024:T:C	6.02368	0.0403669	0.0528345		gene;var:BCAS3|
chr17:57487512-59312755_1	chr17:59249497:rs9903205:A:G	5.91895	0.0369003	0.0518797		gene;var:BCAS3|
chr17:57487512-59312755_1	chr17:59196065:rs1012383:T:G	5.89224	0.0360198	0.0509504		gene;var:BCAS3|
chr17:57487512-59312755_1	chr17:59220844:rs4968427:T:C	5.94344	0.0387292	0.0507161		gene;var:BCAS3|
chr17:57487512-59312755_1	chr17:59262040:rs2204928:T:C	5.82695	0.0367118	0.0503909		gene;var:BCAS3|
chr17:57487512-59312755_1	chr17:59196064:rs1012384:A:G	5.85351	0.0361701	0.0502021		gene;var:BCAS3|
chr17:57487512-59312755_1	chr17:59265918:rs1558259:A:G	5.81515	0.0368109	0.0502004		gene;var:BCAS3|
chr17:57487512-59312755_1	chr17:59247395:rs11658810:C:G	5.74639	0.0389403	0.0497278		gene;var:BCAS3|
chr17:57487512-59312755_1	chr17:59248829:rs4968428:T:C	5.73326	0.039159	0.049719		gene;var:BCAS3|
chr17:57487512-59312755_1	chr17:59250013:rs4640250:A:T	5.78222	0.0376767	0.0494079		gene;var:BCAS3|
chr17:57487512-59312755_1	chr17:59260643:rs12940510:A:G	5.58117	0.0398074	0.0493883		gene;var:BCAS3|
chr17:57487512-59312755_1	chr17:59247676:rs11871955:T:C	5.69372	0.0381901	0.0493109		gene;var:BCAS3|
chr17:57487512-59312755_1	chr17:59263369:rs8077544:A:G	5.56758	0.0397294	0.049285		gene;var:BCAS3|
chr17:57487512-59312755_1	chr17:59254883:rs12951741:A:G	5.6266	0.0386827	0.0489979		gene;var:BCAS3|
chr17:57487512-59312755_1	chr17:59260792:rs12940125:A:T	5.58154	0.0388667	0.0488992		gene;var:BCAS3|
chr17:57487512-59312755_1	chr17:59028366:rs11079406:T:C	5.8965	0.0354599	0.0485312		gene;var:BCAS3|
chr17:8306425-9965921_1	chr17:9840707:rs3786113:T:C	6.51268	0.841335	0.721326	peak|	gene;var:GAS7|
chr17:8306425-9965921_1	chr17:9842264:rs8064739:A:C	6.5149	0.533173	0.714353		gene;var:GAS7|
chr17:8306425-9965921_1	chr17:9840501:rs10852918:A:G	6.45757	0.829149	0.707439	peak|	gene;var:GAS7|
chr17:8306425-9965921_1	chr17:9835462:rs6503274:A:C	-5.92765	0.479375	0.633466		gene;var:RCVRN|
chr17:8306425-9965921_1	chr17:9834894:rs11078823:A:G	-5.87978	0.782192	0.630603	peak|	gene;var:RCVRN|
chr17:8306425-9965921_1	chr17:9835951:rs7221937:T:C	-5.91238	0.474256	0.627938		gene;var:GAS7|
chr17:8306425-9965921_1	chr17:9838605:rs8072109:A:G	6.05422	0.398984	0.559062		gene;var:GAS7|
chr17:9965921-11102815_1	chr17:10031183:rs9913911:A:G	-14.692	0.974788	0.908227	DAR|peak|	gene;var:GAS7|	17:10031183:A:G:GAS7|
chr17:9965921-11102815_2	chr17:10075497:rs2904908:T:C	6.40086	0.494834	0.574627		gene;var:GAS7|
chr17:9965921-11102815_2	chr17:10075514:rs2953453:A:C	6.24817	0.291631	0.340655		gene;var:GAS7|
chr17:9965921-11102815_2	chr17:10075385:rs2904909:A:G	6.19149	0.163602	0.203095		gene;var:GAS7|
chr17:9965921-11102815_1	chr17:10031090:rs12150284:T:C	-14.518	0.0940393	0.202687		gene;var:GAS7|
chr17:9965921-11102815_2	chr17:10074301:rs2904910:T:C	6.04938	0.0925175	0.140579		gene;var:GAS7|
chr17:9965921-11102815_2	chr17:10073324:rs2904911:A:G	6.0132	0.0882041	0.137385		gene;var:GAS7|
chr17:9965921-11102815_2	chr17:10076945:rs2953455:T:C	6.3503	0.0821157	0.128445		gene;var:GAS7|
chr1:91886317-93536459_1	chr1:92068967:rs1192404:A:G	6.09302	0.7206	0.7206		gene;var:CDC7|
chr1:91886317-93536459_1	chr1:92077097:rs1192415:A:G	6.21876	0.705368	0.705368		gene;var:CDC7|
chr1:91886317-93536459_1	chr1:92080059:rs1192419:A:G	6.10131	0.667999	0.667999		gene;var:CDC7|
chr1:91886317-93536459_1	chr1:92077409:rs4658101:A:G	6.09801	0.663342	0.663342		gene;var:CDC7|
chr1:91886317-93536459_1	chr1:92069892:rs1192408:T:C	5.89982	0.648301	0.648301		gene;var:CDC7|
chr1:91886317-93536459_1	chr1:92075134:rs1192414:A:G	5.96396	0.622621	0.622621		gene;var:CDC7|
chr1:91886317-93536459_1	chr1:92073707:rs2136115:T:C	5.93013	0.61568	0.61568		gene;var:CDC7|
chr1:91886317-93536459_1	chr1:92073665:rs2840239:T:C	5.90914	0.611675	0.611675		gene;var:CDC7|
chr1:91886317-93536459_1	chr1:92072897:rs1192413:A:G	5.85382	0.609611	0.609611		gene;var:CDC7|
chr20:36909530-38436761_10	chr20:38017102:rs2179443:C:G	-5.72555	0.130927	0.138044		gene;var:LINC01734|
chr20:36909530-38436761_10	chr20:38074218:rs6101546:T:C	6.16761	0.127935	0.135745		gene;var:LINC01734|
chr20:36909530-38436761_10	chr20:38072560:rs2179444:A:C	6.13103	0.123958	0.131529		gene;var:LINC01734|
chr20:36909530-38436761_10	chr20:37967302:rs2868999:A:G	6.11879	0.255132	0.129455	peak|	gene;var:LINC01734|
chr20:36909530-38436761_10	chr20:38074017:rs11086752:T:C	6.10594	0.1214	0.128815		gene;var:LINC01734|
chr20:36909530-38436761_10	chr20:37958258:rs6129261:T:G	-5.66214	0.118616	0.125196		gene;var:LINC01734|
chr20:36909530-38436761_10	chr20:37984144:rs4812380:T:G	6.05354	0.117148	0.124489		gene;var:LINC01734|
chr20:36909530-38436761_10	chr20:38071770:rs13036616:A:C	6.04523	0.117051	0.123929		gene;var:LINC01734|
chr20:36909530-38436761_10	chr20:38080979:rs2869011:T:G	6.04839	0.116059	0.122863		gene;var:LINC01734|
chr20:36909530-38436761_10	chr20:38092232:rs2869013:A:G	5.90733	0.115744	0.122398		gene;var:LINC01734|
chr20:36909530-38436761_10	chr20:38134207:rs2869015:A:C	5.54226	0.114724	0.120947		gene;var:LINC01734|
chr20:36909530-38436761_10	chr20:38135687:rs6028473:A:G	5.55152	0.114313	0.120508		gene;var:LINC01734|
chr20:36909530-38436761_10	chr20:38080917:rs2223545:T:C	6.02095	0.113719	0.120392		gene;var:LINC01734|
chr20:36909530-38436761_10	chr20:38030323:rs4474940:A:G	6.01983	0.11279	0.119893		gene;var:LINC01734|
chr20:36909530-38436761_10	chr20:38068475:rs6129316:A:T	5.9983	0.112829	0.119453		gene;var:LINC01734|
chr20:36909530-38436761_10	chr20:37988454:rs6129277:C:G	-5.57085	0.112876	0.119198		gene;var:LINC01734|
chr20:36909530-38436761_10	chr20:38030340:rs4474941:A:G	6.01055	0.112049	0.1191		gene;var:LINC01734|
chr20:36909530-38436761_10	chr20:38054942:rs2143214:A:T	6.0082	0.111548	0.118509		gene;var:LINC01734|
chr20:36909530-38436761_10	chr20:38065613:rs6093178:T:C	5.99732	0.111815	0.11838		gene;var:LINC01734|
chr20:36909530-38436761_10	chr20:38056316:rs2903983:T:C	6.00545	0.111407	0.118357		gene;var:LINC01734|
chr20:36909530-38436761_10	chr20:37961412:rs4239688:A:G	-5.55876	0.111897	0.118173		gene;var:LINC01734|
chr20:36909530-38436761_10	chr20:38029177:rs4812385:A:G	5.99555	0.110884	0.117853		gene;var:LINC01734|
chr20:36909530-38436761_10	chr20:38143156:rs4810270:A:G	5.48818	0.111658	0.117739		gene;var:LINC01734|
chr20:36909530-38436761_10	chr20:38156052:rs6028484:T:C	5.51504	0.11153	0.117619		gene;var:LINC01734|
chr20:36909530-38436761_10	chr20:38079606:rs11086753:A:G	5.98275	0.110689	0.11719		gene;var:LINC01734|
chr20:36909530-38436761_10	chr20:38071003:rs6101540:A:C	5.97879	0.11039	0.116873		gene;var:LINC01734|
chr20:36909530-38436761_10	chr20:37959995:rs4810261:A:T	-5.50276	0.110303	0.116478		gene;var:LINC01734|
chr20:36909530-38436761_10	chr20:38080893:rs6129326:T:C	5.97246	0.109917	0.116373		gene;var:LINC01734|
chr20:36909530-38436761_10	chr20:38142828:rs4810269:T:C	5.47108	0.110324	0.116349		gene;var:LINC01734|
chr20:36909530-38436761_10	chr20:38128424:rs6129346:T:C	5.56089	0.10948	0.115541		gene;var:LINC01734|
chr20:36909530-38436761_10	chr20:37950180:rs1008350:C:G	5.90386	0.108632	0.115387		gene;var:LINC01734|
chr20:36909530-38436761_10	chr20:37962356:rs6129265:A:G	-5.53294	0.109446	0.115363		gene;var:LINC01734|
chr20:36909530-38436761_10	chr20:38057290:rs4812389:T:C	5.95796	0.107916	0.114622		gene;var:LINC01734|
chr20:36909530-38436761_10	chr20:38036511:rs2143213:A:G	5.95663	0.107742	0.114223		gene;var:LINC01734|
chr20:36909530-38436761_10	chr20:38022572:rs6101503:A:T	5.9467	0.107354	0.114069		gene;var:LINC01734|
chr20:36909530-38436761_10	chr20:38024936:rs909874:A:G	5.95273	0.107461	0.113929		gene;var:LINC01734|
chr20:36909530-38436761_10	chr20:38058101:rs6101526:T:G	5.94291	0.107138	0.113823		gene;var:LINC01734|
chr20:36909530-38436761_10	chr20:38146438:rs723892:A:G	5.46431	0.107509	0.113419		gene;var:LINC01734|
chr20:36909530-38436761_10	chr20:38005344:rs6129282:A:G	5.92306	0.10662	0.11326		gene;var:LINC01734|
chr20:36909530-38436761_10	chr20:37958191:rs6129260:T:C	-5.45875	0.107097	0.113121		gene;var:LINC01734|
chr20:36909530-38436761_10	chr20:37957395:rs4812376:T:C	-5.49098	0.106868	0.112903		gene;var:LINC01734|
chr20:36909530-38436761_10	chr20:37963721:rs4810262:T:G	-5.49272	0.106581	0.112381		gene;var:LINC01734|
chr20:36909530-38436761_10	chr20:38131089:rs1467400:T:C	5.5432	0.106372	0.112293		gene;var:LINC01734|
chr20:36909530-38436761_10	chr20:37963182:rs6124140:A:C	-5.48645	0.106158	0.111941		gene;var:LINC01734|
chr20:36909530-38436761_10	chr20:38060546:rs2206443:C:G	5.89919	0.104889	0.111251		gene;var:LINC01734|
chr20:36909530-38436761_10	chr20:38025235:rs909876:A:G	5.90671	0.104687	0.111006		gene;var:LINC01734|
chr20:36909530-38436761_10	chr20:37989844:rs12625021:A:T	-5.47877	0.105204	0.110948		gene;var:LINC01734|
chr20:36909530-38436761_10	chr20:37990272:rs1534975:T:G	-5.45868	0.103932	0.109624		gene;var:LINC01734|
chr20:36909530-38436761_10	chr20:38057457:rs4812390:A:G	5.87416	0.102843	0.109211		gene;var:LINC01734|
chr20:36909530-38436761_10	chr20:38058382:rs6101527:A:G	5.87346	0.333075	0.109168	DAR|peak|	gene;var:LINC01734|
chr20:36909530-38436761_10	chr20:38031489:rs6129297:A:G	5.87568	0.217925	0.109033	peak|	gene;var:LINC01734|
chr20:36909530-38436761_10	chr20:38016660:rs1569609:A:C	5.86657	0.102617	0.108943		gene;var:LINC01734|
chr20:36909530-38436761_10	chr20:38057531:rs4812391:T:C	5.86579	0.102368	0.1087		gene;var:LINC01734|
chr20:36909530-38436761_10	chr20:38023014:rs1569611:A:G	5.87233	0.102452	0.108594		gene;var:LINC01734|
chr20:36909530-38436761_10	chr20:38011627:rs3920504:T:C	5.85859	0.102339	0.108475		gene;var:LINC01734|
chr20:36909530-38436761_10	chr20:38064459:rs4812392:A:G	5.85728	0.102427	0.108441		gene;var:LINC01734|
chr20:36909530-38436761_10	chr20:38035964:rs6124149:C:G	5.84747	0.102305	0.108435		gene;var:LINC01734|
chr20:36909530-38436761_9	chr20:38047957:rs1980481:A:C	5.84571	0.10127	0.107473		gene;var:LINC01734|
chr20:36909530-38436761_9	chr20:38024009:rs6129290:T:C	5.80403	0.099669	0.105648		gene;var:LINC01734|
chr20:36909530-38436761_9	chr20:38055015:rs2143215:A:C	5.80616	0.0990484	0.1051		gene;var:LINC01734|
chr20:36909530-38436761_9	chr20:38024040:rs5022136:A:G	5.7988	0.0988446	0.104762		gene;var:LINC01734|
chr20:36909530-38436761_10	chr20:38030479:rs4474942:A:G	5.74504	0.0980623	0.104079		gene;var:LINC01734|
chr20:36909530-38436761_10	chr20:38100604:rs1569605:T:C	5.6424	0.0978753	0.103547		gene;var:LINC01734|
chr20:36909530-38436761_10	chr20:37949055:rs6101464:A:G	5.67339	0.0975848	0.103538		gene;var:LINC01734|
chr20:36909530-38436761_10	chr20:37994182:rs932385:A:G	5.74944	0.097102	0.102887		gene;var:LINC01734|
chr20:36909530-38436761_10	chr20:38101545:rs6028446:A:T	5.65439	0.0972134	0.102826		gene;var:LINC01734|
chr20:36909530-38436761_10	chr20:38009616:rs2206438:A:C	5.73259	0.0963465	0.102065		gene;var:LINC01734|
chr20:36909530-38436761_10	chr20:37992741:rs2206437:A:T	5.7356	0.0961763	0.101885		gene;var:LINC01734|
chr20:36909530-38436761_10	chr20:37940011:rs8123586:A:G	5.47914	0.0952459	0.100975		gene;var:LINC01734|
chr20:36909530-38436761_10	chr20:38093948:rs1111448:A:T	5.56272	0.0954238	0.100946		gene;var:LINC01734|
chr20:36909530-38436761_10	chr20:38105055:rs6101567:A:G	5.56128	0.0953269	0.100841		gene;var:LINC01734|
chr20:36909530-38436761_10	chr20:37962422:rs6129266:A:C	5.68436	0.0951271	0.100752		gene;var:LINC01734|
chr20:36909530-38436761_10	chr20:38038383:rs2223550:A:G	5.70668	0.0949443	0.100548		gene;var:LINC01734|
chr20:36909530-38436761_10	chr20:38093425:rs6129333:A:G	5.55966	0.0949799	0.100478		gene;var:LINC01734|
chr20:36909530-38436761_10	chr20:37948298:rs1008351:C:G	5.45167	0.0942287	0.0998544		gene;var:LINC01734|
chr20:36909530-38436761_10	chr20:37994003:rs932384:T:G	5.66225	0.0939211	0.0994626		gene;var:LINC01734|
chr20:36909530-38436761_10	chr20:37994859:rs1158923:A:G	5.65616	0.0937322	0.0992583		gene;var:LINC01734|
chr20:36909530-38436761_10	chr20:38073575:rs4812393:T:C	5.60739	0.0931432	0.0986197		gene;var:LINC01734|
chr20:36909530-38436761_10	chr20:37995874:rs6101488:A:G	5.63585	0.0929759	0.0984467		gene;var:LINC01734|
chr20:36909530-38436761_10	chr20:37977945:rs2869003:T:C	5.58861	0.0926066	0.0980923		gene;var:LINC01734|
chr20:36909530-38436761_10	chr20:37958043:rs6028390:A:T	5.51239	0.0915752	0.0969569		gene;var:LINC01734|
chr20:36909530-38436761_10	chr20:37948756:rs6101463:T:C	5.47993	0.0914412	0.0968398		gene;var:LINC01734|
chr20:36909530-38436761_10	chr20:37958704:rs932552:A:G	5.48554	0.0910135	0.096338		gene;var:LINC01734|
chr20:36909530-38436761_10	chr20:38082252:rs877313:T:C	5.50214	0.0907483	0.0959554		gene;var:LINC01734|
chr20:36909530-38436761_10	chr20:38078495:rs6124156:T:C	5.46589	0.0899074	0.0950353		gene;var:LINC01734|
chr20:38436761-39610856_1	chr20:38563245:rs2145943:A:G	-6.00562	0.896335	0.896335		gene;var:LINC01734|
chr20:38436761-39610856_1	chr20:38538768:rs6065171:T:C	5.50855	0.60629	0.60629		gene;var:LINC01734|
chr20:38436761-39610856_1	chr20:38566077:rs6129447:A:C	5.55902	0.554999	0.554999		gene;var:LINC01734|
chr20:44839056-47199980_1	chr20:45534053:rs6124885:A:G	5.55457	0.941087	0.791564	DAR|peak|	gene;var:EYA2|
chr20:44839056-47199980_1	chr20:45541630:rs6012072:T:C	5.48944	0.482652	0.655938		gene;var:EYA2|
chr20:44839056-47199980_1	chr20:45543676:rs6122536:T:C	5.48818	0.472261	0.647603		gene;var:EYA2|
chr20:5477850-7084073_2	chr20:6495414:rs6133328:A:C	-6.50541	0.992367	1		gene;var:BMP2|
chr20:5477850-7084073_8	chr20:6558282:rs6107837:A:C	-7.88332	4.57046e-06	1		gene;var:BMP2|
chr20:5477850-7084073_1	chr20:6578556:rs6054374:T:C	-7.84609	1	1	DAR|peak|	gene;var:BMP2|
chr20:5477850-7084073_4	chr20:6578629:rs6054375:T:G	-6.51444	1	1	DAR|peak|	gene;var:BMP2|
chr20:5477850-7084073_6	chr20:6578633:rs6140036:T:G	-6.59991	1	1	DAR|peak|	gene;var:BMP2|
chr20:5477850-7084073_5	chr20:6583718:rs6054382:T:C	-7.96148	0	1		gene;var:BMP2|
chr20:5477850-7084073_9	chr20:6542370:rs6140028:T:G	-7.59893	0	1		gene;var:BMP2|
chr20:5477850-7084073_3	chr20:6500352:rs6117315:A:T	-9.06579	3.04047e-07	0.956203		gene;var:BMP2|
chr2:110572432-113921856_1	chr2:111638775:rs9308689:T:C	-6.40215	1	1		gene;var:ACOXL|
chr2:110572432-113921856_2	chr2:111641686:rs11123221:A:G	-5.45374	1	1		gene;var:ACOXL|
chr21:38711704-40482902_1	chr21:40425414:rs2836863:A:G	5.71392	0.695334	0.695334		gene;var:PSMG1|
chr21:38711704-40482902_1	chr21:40407051:rs13050893:C:G	5.78703	0.661047	0.661047		gene;var:PSMG1|
chr21:38711704-40482902_1	chr21:40404143:rs6517503:A:C	5.96583	0.658379	0.658379		gene;var:PSMG1|
chr21:38711704-40482902_1	chr21:40413101:rs9974632:A:G	5.87427	0.602769	0.602769		gene;var:PSMG1|
chr21:38711704-40482902_1	chr21:40425034:rs9984498:T:C	5.62096	0.600973	0.600973		gene;var:PSMG1|
chr21:38711704-40482902_1	chr21:40406630:rs13050568:A:G	6.07127	0.599692	0.599692		gene;var:PSMG1|
chr21:38711704-40482902_1	chr21:40404973:rs722792:T:C	6.05617	0.596175	0.596175		gene;var:PSMG1|
chr21:38711704-40482902_1	chr21:40415371:rs2836855:T:C	5.98253	0.589774	0.589774		gene;var:PSMG1|
chr21:38711704-40482902_1	chr21:40404559:rs9974440:A:C	5.98275	0.580426	0.580426		gene;var:PSMG1|
chr21:38711704-40482902_1	chr21:40403534:rs35474192:A:G	5.78143	0.58004	0.58004		gene;var:PSMG1|
chr21:38711704-40482902_1	chr21:40448610:rs445346:A:G	5.65895	0.574478	0.574478		gene;var:PSMG1|
chr2:152486782-154005056_1	chr2:153364527:rs1579050:A:G	-8.78291	0.251079	0.361489		gene;var:FMNL2|
chr2:152486782-154005056_1	chr2:153357541:rs6434068:C:G	-8.77646	0.392194	0.262429	peak|	gene;var:FMNL2|
chr2:152486782-154005056_1	chr2:153361700:rs55882252:T:C	-8.6954	0.169579	0.252725		gene;var:FMNL2|
chr2:152486782-154005056_1	chr2:153357383:rs6714213:A:C	-8.72542	0.314341	0.209718	peak|	gene;var:FMNL2|
chr2:152486782-154005056_1	chr2:153359512:rs62180804:T:G	-8.59123	0.113318	0.167076		gene;var:FMNL2|
chr2:152486782-154005056_1	chr2:153366827:rs12471183:T:C	-8.47259	0.08497	0.12458		gene;var:FMNL2|
chr2:152486782-154005056_1	chr2:153362979:rs2346206:A:G	-8.42777	0.0772372	0.113262		gene;var:FMNL2|
chr22:18296088-19912358_2	chr22:19871097:rs13057374:C:G	-6.71858	1	1		gene;var:TXNRD2|
chr22:18296088-19912358_1	chr22:19871553:rs5993851:T:C	-8.53431	1	1		gene;var:TXNRD2|
chr22:27834752-29651799_4	chr22:29127412:rs9613667:A:C	-5.82297	0.938254	0.960869		gene;var:CHEK2|
chr22:27834752-29651799_2	chr22:29616265:rs132384:A:G	6.00768	0.817521	0.774624		gene;var:EMID1|
chr22:27834752-29651799_3	chr22:29108229:rs5752776:A:G	-7.31588	0.832921	0.649391	peak|	gene;var:CHEK2|
chr22:27834752-29651799_3	chr22:28782187:rs134530:T:C	-5.47765	0.286423	0.574406		gene;var:TTC28|
chr22:27834752-29651799_1	chr22:29115066:rs4822983:T:C	-7.2962	0.217564	0.354323		gene;var:CHEK2|
chr22:27834752-29651799_2	chr22:29620325:rs9608740:A:C	6.20345	0.264234	0.329611		gene;var:EMID1|
chr22:27834752-29651799_3	chr22:29110759:rs2078555:C:G	-7.2188	0.127719	0.169985		gene;var:CHEK2|
chr22:27834752-29651799_3	chr22:29130012:rs738722:T:C	-5.86281	0.463038	0.169023	Promoter|	gene;var:CHEK2|
chr22:27834752-29651799_3	chr22:29100711:rs1547014:T:C	-6.96271	0.156619	0.167996		gene;var:TTC28|
chr22:27834752-29651799_3	chr22:29107195:rs5752775:A:G	-7.01705	0.135286	0.139514		gene;var:CHEK2|
chr22:27834752-29651799_3	chr22:29105610:rs5752774:T:C	-7.27284	0.105838	0.131819		gene;var:CHEK2|
chr22:27834752-29651799_3	chr22:29105415:rs5752773:C:G	-7.08445	0.115244	0.125565		gene;var:CHEK2|
chr22:27834752-29651799_3	chr22:29101357:rs6005840:A:G	-7.23492	0.100393	0.118691		gene;var:TTC28|
chr22:27834752-29651799_3	chr22:29131129:rs1807609:T:C	-6.05571	0.350119	0.114435	Promoter|	gene;var:CHEK2|
chr22:27834752-29651799_3	chr22:28856760:rs695272:T:C	-6.07654	0.102314	0.113092		gene;var:TTC28|
chr22:27834752-29651799_3	chr22:28886805:rs2346397:T:C	-6.08389	0.101662	0.112024		gene;var:TTC28|
chr22:27834752-29651799_3	chr22:29131788:rs4352308:T:C	-6.07115	0.106608	0.108341		gene;var:CHEK2|
chr22:27834752-29651799_3	chr22:28657013:rs134196:T:C	-5.86296	0.210379	0.106947	peak|	gene;var:TTC28-AS1|
chr22:27834752-29651799_3	chr22:29102967:rs743184:A:G	-5.92105	0.116459	0.104393		gene;var:TTC28|
chr22:27834752-29651799_3	chr22:29100977:rs5762752:C:G	-5.8742	0.113584	0.101663		gene;var:TTC28|
[truncated: 685 more rows]

## Sheet: Currant OST
LD block	GWAS variant	Z score	functional PIP	uniform PIP	genomic annotation	linked or nearby gene	overlapped eQTL
[truncated: 841 more rows]

[truncated: 3 more sheets: Currant ONL, Currant IST, Jiang Diabetic retinopathy]
