# Supplementary material for: Integrated multi-omics single cell atlas of the human retina
Source: Research Square preprint supplement (doi:10.21203/rs.3.rs-3471275/v1), 2023-11-16
Supplement: Supplementary file 4 [file 4b1233df6d993499ae14b345.xlsx]

## Sheet: KEGG_age_gsea_up
Table S17. Gene set enrichment results for age-, gender-, interaction between age and gender- dependent genes
	Rod	BC	RGC	AC
Antigen processing and presentation	6.01822e-05	0.00194401	1	1
Neuroactive ligand-receptor interaction	6.01822e-05	1	1	1
Protein digestion and absorption	0.000485504	0.0735116	1	1
Cholinergic synapse	0.000610323	1	1	1
Rap1 signaling pathway	0.000610323	1	1	1
MAPK signaling pathway	0.000765357	1	1	1
Hematopoietic cell lineage	0.000887998	0.00989336	1	0.0466469
Parathyroid hormone synthesis, secretion and action	0.000887998	0.0802473	1	1
Cytokine-cytokine receptor interaction	0.00129067	1	1	1
Cell adhesion molecules	0.00129067	1	1	1
Pancreatic secretion	0.00151531	1	1	1
Steroid hormone biosynthesis	0.00233613	0.00948699	0.0460139	1
Mineral absorption	0.00240822	0.00189738	1	1
Calcium signaling pathway	0.00240822	1	1	1
Salivary secretion	0.00342999	1	1	1
Estrogen signaling pathway	0.00380574	1	1	1
Gastric acid secretion	0.00523796	1	1	1
Gap junction	0.00882408	1	1	1
Dopaminergic synapse	0.00882408	1	1	1
Type I diabetes mellitus	0.0097655	0.0124548	1	1
Endocrine and other factor-regulated calcium reabsorption	0.0100538	1	1	1
Adrenergic signaling in cardiomyocytes	0.0100538	1	1	1
Bile secretion	0.0101051	0.0629762	1	1
Chemical carcinogenesis - receptor activation	0.0114221	1	1	1
Malaria	0.0127125	0.00298779	1	1
Autoimmune thyroid disease	0.0127125	0.00948699	1	0.020016
Cocaine addiction	0.0127125	1	1	1
GABAergic synapse	0.0127125	1	1	1
Graft-versus-host disease	0.0127631	0.0183783	1	1
Ras signaling pathway	0.012813	1	1	1
Morphine addiction	0.014373	1	1	1
Allograft rejection	0.0156406	0.0109024	1	0.020016
Aldosterone-regulated sodium reabsorption	0.0168051	1	1	1
Alanine, aspartate and glutamate metabolism	0.0180985	1	1	1
Oxytocin signaling pathway	0.0180985	1	1	1
Glutamatergic synapse	0.0181126	1	1	1
Aldosterone synthesis and secretion	0.0185664	1	1	1
Alcoholism	0.0256664	1	1	1
Viral myocarditis	0.0302704	0.0223832	1	1
Circadian entrainment	0.0343643	1	1	1
Nicotine addiction	0.0344544	1	1	1
Cholesterol metabolism	0.0357027	1	1	1
Fluid shear stress and atherosclerosis	0.0357027	1	1	1
Sphingolipid metabolism	0.036384	1	1	1
cAMP signaling pathway	0.036384	1	1	1
Thyroid hormone synthesis	0.0396781	1	1	1
Phagosome	0.0396781	0.00189738	1	1
Amphetamine addiction	0.0451426	1	1	1
African trypanosomiasis	0.0510221	1	1	1
Relaxin signaling pathway	0.0515329	1	1	1
Growth hormone synthesis, secretion and action	0.0532425	1	1	1
Starch and sucrose metabolism	0.054076	1	1	1
Leishmaniasis	0.054076	0.0603212	1	1
Focal adhesion	0.05526	1	1	1
Complement and coagulation cascades	0.0563481	0.00189738	1	9.54596e-05
Pathways in cancer	0.061769	1	1	1
Signaling pathways regulating pluripotency of stem cells	0.0688348	1	1	1
Proximal tubule bicarbonate reclamation	0.0745362	0.0583331	1	1
Staphylococcus aureus infection	1	0.00274983	1	1
Arginine and proline metabolism	1	0.00281061	1	1
Galactose metabolism	1	0.0223832	1	1
Rheumatoid arthritis	1	0.0223832	1	1
Biosynthesis of amino acids	1	0.0286729	1	1
PPAR signaling pathway	1	0.0414791	1	1
Arachidonic acid metabolism	1	0.0477784	1	1
Human T-cell leukemia virus 1 infection	1	0.0477784	1	1
Nitrogen metabolism	1	0.05672	1	1
Biosynthesis of cofactors	1	0.0583331	1	1
Chemical carcinogenesis - DNA adducts	1	0.0598469	1	1
Epstein-Barr virus infection	1	0.0603212	1	1
Inflammatory bowel disease	1	0.0629762	1	1
Carbon metabolism	1	0.0802473	1	1
Glyoxylate and dicarboxylate metabolism	1	0.0834459	1	1
Pentose and glucuronate interconversions	1	1	0.0478431	1
Phototransduction	1	1	1	4.18249e-06

## Sheet: KEGG_age_gsea_down
	Rod	BC	RGC	AC
Ribosome	2.11514e-15	1	2.10455e-31	1
Coronavirus disease - COVID-19	1.51573e-08	1	1.15444e-26	1
Herpes simplex virus 1 infection	0.00882408	1	1	1
Polycomb repressive complex	0.0357027	0.0477784	1	1
Circadian rhythm	1	0.0103985	1	1
Ubiquitin mediated proteolysis	1	0.0275876	1	0.020016
Long-term depression	1	0.0508556	1	1
Wnt signaling pathway	1	0.0749517	1	1
Parkinson disease	1	1	1.20491e-17	1
Prion disease	1	1	1.53814e-14	1
Pathways of neurodegeneration - multiple diseases	1	1	8.64636e-14	1
Alzheimer disease	1	1	4.10556e-13	1
Oxidative phosphorylation	1	1	2.49203e-11	1
Amyotrophic lateral sclerosis	1	1	6.90959e-10	1
Huntington disease	1	1	1.76345e-08	1
Diabetic cardiomyopathy	1	1	4.3398e-08	1
Chemical carcinogenesis - reactive oxygen species	1	1	5.66172e-08	1
Thermogenesis	1	1	1.9259e-06	1
Non-alcoholic fatty liver disease	1	1	6.79388e-05	1
Salmonella infection	1	1	0.000337088	1
Necroptosis	1	1	0.00613023	1
Carbon metabolism	1	1	0.0122812	1
Glycolysis / Gluconeogenesis	1	1	0.014623	1
Phagosome	1	1	0.014623	1
Glucagon signaling pathway	1	1	0.0258019	1
Fluid shear stress and atherosclerosis	1	1	0.0265454	1
Cardiac muscle contraction	1	1	0.03105	1
Human immunodeficiency virus 1 infection	1	1	0.0460139	1
Cysteine and methionine metabolism	1	1	0.0478431	1
Axon guidance	1	1	0.0525676	0.020016
Vibrio cholerae infection	1	1	0.0613592	1
Long-term potentiation	1	1	0.0647347	9.54596e-05
Retrograde endocannabinoid signaling	1	1	0.0656686	1
Adrenergic signaling in cardiomyocytes	1	1	0.0661495	1
Olfactory transduction	1	1	1	0.000867426
Phosphatidylinositol signaling system	1	1	1	0.0335353
Growth hormone synthesis, secretion and action	1	1	1	0.0335353

## Sheet: GO_BP_age_gsea_up
	Rod	Cone	BC	RGC	AC
regulation of ion transport	2.55143e-11	1	1	1	1
regulation of trans-synaptic signaling	1.32394e-09	1	1	1	1
regulation of membrane potential	2.06923e-08	1	1	1	1
G protein-coupled receptor signaling pathway	3.30429e-08	1	1	1	1
neurotransmitter transport	4.9532e-08	1	0.0131117	1	1
chemotaxis	3.46691e-07	1	1	1	1
regulation of neurotransmitter transport	5.8112e-07	1	1	1	1
regulation of neurotransmitter secretion	1.23771e-06	1	1	1	1
regulation of neurotransmitter levels	3.28784e-06	1	0.0146814	1	1
axon development	4.34687e-06	1	1	1	1
catecholamine secretion	4.67564e-06	1	1	1	1
regulation of nervous system development	4.67564e-06	1	1	1	1
regulated exocytosis	4.74541e-06	1	1	1	1
chemical synaptic transmission, postsynaptic	6.18617e-06	1	1	1	1
signal release	6.89225e-06	1	0.0738443	1	1
import into cell	7.14564e-06	1	1	0.0834971	1
regulation of cell activation	7.50853e-06	1	0.0023959	1	1
regulation of catecholamine secretion	9.26921e-06	1	0.0165896	1	1
gliogenesis	9.26921e-06	1	1	1	1
regulation of cation transmembrane transport	1.13804e-05	1	1	1	1
blood vessel morphogenesis	1.48746e-05	1	1	1	1
circulatory system process	1.72758e-05	1	1	1	1
response to wounding	2.1007e-05	1	0.000226005	1	0.0838193
regulation of secretion by cell	5.61447e-05	1	0.0237488	1	1
behavior	5.9242e-05	1	1	1	1
hemostasis	6.7868e-05	1	1	1	1
regulation of neurogenesis	6.7868e-05	1	1	1	1
positive regulation of locomotion	6.7868e-05	1	1	1	1
positive regulation of cell motility	6.80162e-05	1	1	1	1
regulation of transporter activity	8.2255e-05	1	1	1	1
response to metal ion	0.000107734	1	1	1	1
inflammatory response	0.000120019	1	0.00131573	1	0.0838193
positive regulation of cell development	0.000127292	1	1	1	1
blood coagulation	0.000130132	1	0.00188826	1	0.0511418
regulation of cell-cell adhesion	0.000132785	1	1	1	1
regeneration	0.000146217	1	0.00424085	1	1
coagulation	0.000154262	1	0.00145444	1	0.0550615
cellular response to metal ion	0.000157565	1	1	1	1
diencephalon development	0.000201196	1	1	1	1
leukocyte differentiation	0.000207406	1	1	1	1
positive regulation of viral life cycle	0.000216803	1	0.0716082	1	1
calcium ion transport	0.000225964	1	1	1	1
cell chemotaxis	0.000251347	1	1	1	1
negative regulation of immune system process	0.000257794	1	1	1	1
cell-cell adhesion via plasma-membrane adhesion molecules	0.000258549	1	1	1	1
import across plasma membrane	0.000274751	1	1	1	1
positive regulation of immune system process	0.000299503	1	1	1	1
vesicle-mediated transport in synapse	0.000349173	1	1	1	1
gland morphogenesis	0.000439139	1	1	1	1
multicellular organismal signaling	0.000439139	1	1	1	1
myeloid leukocyte activation	0.000455797	1	0.00687721	1	1
extracellular structure organization	0.000470704	1	1	1	1
regulation of small molecule metabolic process	0.000552068	1	0.0147291	1	1
central nervous system neuron differentiation	0.000572001	1	1	1	1
relaxation of muscle	0.000626316	1	1	1	1
positive regulation of cytokine production	0.000693339	1	0.00861259	1	1
cellular response to fatty acid	0.000717745	1	0.0140059	1	1
regulation of hormone levels	0.000717745	1	1	1	1
negative regulation of cell population proliferation	0.00077205	1	0.00430485	1	1
membrane raft organization	0.000782766	0.0356492	0.0423338	1	1
divalent inorganic cation homeostasis	0.000796034	1	1	1	1
leukocyte activation involved in inflammatory response	0.00089752	1	1	1	1
plasma membrane organization	0.00111476	1	0.0113681	1	1
cardiac muscle cell action potential involved in contraction	0.00111693	1	1	1	1
inorganic cation import across plasma membrane	0.0012005	1	1	1	1
inorganic ion import across plasma membrane	0.0012005	1	1	1	1
regulation of system process	0.0012005	1	1	1	1
skeletal muscle cell proliferation	0.00120363	1	1	1	1
adult locomotory behavior	0.0013073	1	1	1	1
sensory perception of pain	0.00137115	1	1	1	1
immune effector process	0.00137115	1	0.000958913	1	0.0554898
intermediate filament organization	0.00139364	3.08115e-05	0.00131573	1	0.0038676
epithelial cell proliferation	0.00143645	1	1	1	1
homotypic cell-cell adhesion	0.00146487	1	0.0108244	1	1
small molecule biosynthetic process	0.00146487	1	0.00515558	1	1
regulation of neuron death	0.00183762	1	1	1	1
positive regulation of myeloid leukocyte differentiation	0.00188794	1	1	1	1
regulation of coagulation	0.00188794	1	0.000473119	1	1
response to nicotine	0.00206823	1	1	1	1
cellular response to growth factor stimulus	0.00209045	1	1	1	1
vascular transport	0.00213365	1	1	1	1
transport across blood-brain barrier	0.00213365	1	1	1	1
regulation of blood coagulation	0.00217198	1	0.00092575	1	1
sodium ion transport	0.00222171	1	1	1	1
peptidyl-tyrosine modification	0.00273435	1	1	1	1
reproductive structure development	0.00280353	1	1	1	1
regulation of inflammatory response	0.00280353	1	1	1	1
positive regulation of receptor recycling	0.00306287	1	0.0077367	1	1
positive regulation of response to external stimulus	0.00323636	1	0.0217776	1	1
antigen processing and presentation of endogenous antigen	0.00361293	1	0.00766813	1	1
response to alcohol	0.0038865	1	1	1	1
neuron death	0.0039049	1	1	1	1
response to amine	0.00394661	1	1	1	1
response to corticosterone	0.00428484	1	0.0152722	1	1
mesenchymal cell proliferation	0.00430314	1	1	1	1
response to toxic substance	0.00430314	1	0.000171854	1	1
response to steroid hormone	0.00433232	1	1	1	1
learning or memory	0.00436356	1	1	1	1
sodium ion transmembrane transport	0.00441727	1	1	1	1
leukocyte cell-cell adhesion	0.00441727	1	0.0301417	1	1
positive regulation of protein phosphorylation	0.00446423	1	1	1	1
positive regulation of developmental growth	0.00479751	1	1	1	1
cellular divalent inorganic cation homeostasis	0.0048834	1	1	1	1
inositol phosphate biosynthetic process	0.00490814	1	1	1	1
response to fatty acid	0.00493282	1	0.0228809	1	1
regulation of microglial cell activation	0.00497664	1	1	1	1
calcium ion transmembrane transport	0.00499854	1	1	1	1
regulation of chemotaxis	0.00502379	1	1	1	1
synapse organization	0.00504017	1	1	1	1
regulation of skeletal muscle cell proliferation	0.00515835	1	1	1	1
positive regulation of ERK1 and ERK2 cascade	0.00523531	1	1	1	1
regulation of MAP kinase activity	0.00545599	1	1	1	1
cell activation involved in immune response	0.0054723	1	1	1	1
cytokine production	0.0055019	1	0.0184028	1	1
muscle tissue development	0.00567286	1	1	1	1
response to temperature stimulus	0.00601761	1	1	1	1
regulation of peptidase activity	0.006141	1	0.0484335	1	1
regulation of mononuclear cell proliferation	0.00621767	1	1	1	1
protein localization to synapse	0.00639696	1	1	1	1
response to xenobiotic stimulus	0.00651944	1	0.0452445	1	1
neuromuscular process controlling balance	0.00668131	1	1	1	1
regulation of cellular ketone metabolic process	0.00738055	1	0.00750616	1	1
negative regulation of response to external stimulus	0.00745754	1	1	1	0.0550615
tissue migration	0.00746408	1	1	1	1
response to bacterium	0.00746408	1	0.00105194	1	1
transmission of nerve impulse	0.00785308	1	1	1	1
regulation of smooth muscle cell migration	0.00830344	1	1	1	1
positive regulation of T cell activation	0.00850444	1	1	1	1
intermediate filament-based process	0.00871909	0.0356492	0.00255619	1	0.048346
positive regulation of smooth muscle cell proliferation	0.00871909	1	1	1	1
chaperone-mediated autophagy	0.0087739	1	0.0660516	1	1
response to acetylcholine	0.0087739	1	1	1	1
protein transport along microtubule	0.00901217	1	1	1	1
microtubule-based protein transport	0.00901217	1	1	1	1
endothelial cell migration	0.00901715	1	1	1	1
regulation of morphogenesis of an epithelium	0.00934631	1	1	1	1
actin-mediated cell contraction	0.00977556	1	1	1	1
regulation of vesicle fusion	0.00982722	1	0.0471031	1	1
synaptic transmission, glutamatergic	0.00982722	1	1	1	1
sex differentiation	0.0102296	1	1	1	1
positive regulation of alcohol biosynthetic process	0.0104936	1	1	1	1
receptor internalization	0.0106627	1	0.0512873	1	1
viral entry into host cell	0.0110689	1	0.0234514	1	1
regulation of lipase activity	0.0116763	1	0.0183162	1	1
ERK1 and ERK2 cascade	0.0118075	1	1	1	1
smooth muscle cell migration	0.0119375	1	1	1	1
negative regulation of signal transduction in absence of ligand	0.012055	1	1	1	1
negative regulation of extrinsic apoptotic signaling pathway in absence of ligand	0.012055	1	1	1	1
positive regulation of stem cell proliferation	0.012055	1	1	1	1
response to organophosphorus	0.0123698	1	0.0450062	1	1
alcohol metabolic process	0.0129158	1	1	1	1
protein refolding	0.0130629	1	0.00188826	1	1
collagen metabolic process	0.0132889	1	0.0528347	1	1
response to purine-containing compound	0.0140453	1	0.0565064	1	1
export across plasma membrane	0.0140607	1	1	1	1
T cell mediated cytotoxicity	0.0143243	1	0.0269208	1	1
positive regulation of animal organ morphogenesis	0.0145336	1	1	1	1
reflex	0.0156119	1	1	1	1
leukocyte proliferation	0.0158161	1	0.00409512	1	1
hormone transport	0.0158815	1	0.0820316	1	1
AMP metabolic process	0.0160462	1	1	1	1
response to mechanical stimulus	0.0161874	1	1	1	1
regulation of glutamate secretion	0.0163023	1	1	1	1
response to hypoxia	0.0163023	1	1	1	1
regulation of smooth muscle contraction	0.0164763	1	0.0786281	1	1
neural retina development	0.0166392	1	0.0701496	1	0.0678283
response to fibroblast growth factor	0.0167532	1	0.0811107	1	1
chaperone cofactor-dependent protein refolding	0.0168128	1	1	1	1
plasminogen activation	0.0174351	1	0.00720995	1	0.00153366
neuron migration	0.0176815	1	1	1	1
anterograde axonal transport	0.0178486	1	1	1	1
cerebellar granular layer development	0.0181883	1	1	1	1
positive regulation of kinase activity	0.0182969	1	1	1	1
positive regulation of endothelial cell chemotaxis	0.0183113	1	1	1	1
cytokine production involved in immune response	0.0183113	1	0.0140059	1	1
regulation of cytokine production involved in immune response	0.0183113	1	0.0140059	1	1
organic acid biosynthetic process	0.0183631	1	1	1	1
synapse assembly	0.0191212	1	1	1	1
neuron recognition	0.0194043	1	1	1	1
regulation of postsynaptic membrane neurotransmitter receptor levels	0.0194998	1	1	1	1
cellular ketone metabolic process	0.0196714	1	0.00861259	1	1
regulation of postsynaptic density assembly	0.0209027	1	1	1	1
mast cell migration	0.0209231	1	1	1	1
mature B cell differentiation involved in immune response	0.0226198	1	1	1	1
regulation of excitatory synapse assembly	0.0226212	1	1	1	1
positive regulation of transporter activity	0.0227463	1	1	1	1
heterotypic cell-cell adhesion	0.0228394	1	1	1	1
neuron projection extension	0.0235171	1	1	1	1
axis elongation	0.0238698	1	1	1	1
outflow tract septum morphogenesis	0.0241925	1	1	1	1
regulation of development, heterochronic	0.0241925	1	1	1	1
ossification	0.0242313	1	1	1	1
negative regulation of bone mineralization	0.0244772	1	1	1	1
regulation of cell division	0.0252446	1	1	1	1
cellular response to acetylcholine	0.0255646	1	1	1	1
mating behavior	0.0257186	1	1	1	1
regulation of morphogenesis of a branching structure	0.0258121	1	1	1	1
cranial nerve morphogenesis	0.0258769	1	1	1	1
positive regulation of cell killing	0.0260813	1	1	1	1
positive regulation of leukocyte mediated cytotoxicity	0.0263177	1	1	1	1
protein localization to postsynaptic membrane	0.026578	1	1	1	1
neuron cellular homeostasis	0.0271275	1	1	1	1
neurotransmitter receptor internalization	0.0271429	1	1	1	1
regulation of growth	0.0271429	1	1	1	1
negative regulation of peptidase activity	0.0280333	1	1	1	1
response to ischemia	0.0280345	1	1	1	1
response to amyloid-beta	0.0282818	1	1	1	1
cell fate commitment	0.030061	1	1	1	1
regulation of T cell mediated cytotoxicity	0.0302242	1	0.0321656	1	1
cellular response to nitrogen compound	0.0302242	1	1	1	1
multi-organism reproductive process	0.0305332	1	0.00131573	1	1
response to prostaglandin	0.0307271	1	1	1	1
regulation of response to wounding	0.0308183	1	0.024964	1	1
lymphocyte proliferation	0.030965	1	0.0158988	1	1
IMP biosynthetic process	0.0311716	1	1	1	1
cell recognition	0.0311716	1	1	1	1
regulation of plasminogen activation	0.0313115	1	0.0131117	1	0.00388029
negative regulation of neuron apoptotic process	0.0314081	1	1	1	1
regulation of organelle transport along microtubule	0.0314755	1	1	1	1
ovulation cycle	0.031516	1	1	1	1
biological process involved in interaction with host	0.031516	1	0.0600057	1	1
regulation of neuroblast proliferation	0.0318538	1	1	1	1
positive regulation of striated muscle contraction	0.0318883	1	1	1	1
negative regulation of hydrolase activity	0.0320675	1	1	1	1
positive regulation of cell projection organization	0.0320814	1	1	1	1
negative regulation of lymphocyte mediated immunity	0.0321543	1	1	1	1
neurotransmitter receptor transport	0.0321593	1	1	1	1
negative regulation of protein polymerization	0.0321593	1	1	1	1
kidney morphogenesis	0.0321833	1	1	1	1
regulation of timing of cell differentiation	0.032563	1	1	1	1
ganglion development	0.0333237	1	1	1	1
dopamine receptor signaling pathway	0.0333237	1	1	1	1
chaperone-mediated protein folding	0.0336745	1	1	1	1
multi-multicellular organism process	0.0340174	1	0.00170426	1	1
regulation of presynapse organization	0.034062	1	1	1	1
potassium ion transport	0.0346978	1	1	1	1
cellular response to organic cyclic compound	0.0347793	1	1	1	1
amine catabolic process	0.0350696	1	1	1	1
anatomical structure arrangement	0.0350696	1	1	1	1
regulation of postsynaptic density organization	0.0350808	1	1	1	1
regulation of tube size	0.0350808	1	1	1	1
regulation of tube diameter	0.0350808	1	1	1	1
blood vessel diameter maintenance	0.0350808	1	1	1	1
positive regulation of cell junction assembly	0.0355206	1	1	1	1
alpha-amino acid catabolic process	0.0355215	1	0.0471728	1	1
regulation of mesenchymal cell proliferation	0.0355729	1	1	1	1
negative regulation of muscle tissue development	0.0357949	1	1	1	1
movement in host	0.0360464	1	0.0643698	1	1
regulation of leukocyte migration	0.0368117	1	0.0825052	1	1
humoral immune response	0.037298	1	0.0239765	1	0.0618761
organic cation transport	0.037541	1	1	1	1
biomineralization	0.0379297	1	1	1	1
regulation of steroid metabolic process	0.0392759	1	1	1	1
protein complex oligomerization	0.0393137	1	1	1	1
regulation of ossification	0.0397218	1	1	1	1
membrane fusion	0.0399848	1	1	1	1
modulation by symbiont of entry into host	0.0402891	1	0.0301011	1	1
immune response-regulating signaling pathway	0.0405193	1	1	1	1
steroid metabolic process	0.0414417	1	0.0317505	1	1
regulation of miRNA metabolic process	0.0417662	1	1	1	1
negative regulation of biomineralization	0.0425925	1	1	1	1
calcium ion transmembrane import into cytosol	0.0428019	1	1	1	1
positive regulation of natural killer cell mediated immunity	0.043016	1	1	1	1
cellular response to cytokine stimulus	0.0430856	1	0.0281692	1	1
inner ear morphogenesis	0.0430887	1	1	1	1
amine metabolic process	0.0431373	1	0.0181823	1	1
negative regulation of transcription from RNA polymerase II promoter in response to stress	0.0433246	1	1	1	1
metanephros development	0.0433246	1	1	1	1
morphogenesis of a branching structure	0.0434547	1	1	1	1
inclusion body assembly	0.0435938	1	1	1	1
plasma membrane repair	0.0438017	1	0.00145444	1	1
establishment of skin barrier	0.0439916	1	1	1	1
regulation of neurotransmitter receptor activity	0.0445309	1	1	1	1
developmental cell growth	0.0458062	1	1	1	1
neural precursor cell proliferation	0.0465691	1	1	1	1
synaptic membrane adhesion	0.0466114	1	1	1	1
bone mineralization	0.0466114	1	1	1	1
organic hydroxy compound biosynthetic process	0.0469324	1	0.0392552	1	1
regulation of carbohydrate biosynthetic process	0.0470014	1	1	1	1
cardiac cell development	0.0470138	1	1	1	1
response to estradiol	0.047308	1	1	1	1
regulation of immune response	0.0473613	1	1	1	1
indole-containing compound metabolic process	0.0480675	1	1	1	1
cellular response to organonitrogen compound	0.0481138	1	1	1	1
positive regulation of hydrolase activity	0.0487448	1	1	1	1
developmental growth	0.0487448	1	1	1	1
mast cell mediated immunity	0.049563	1	1	1	1
striated muscle cell differentiation	0.0497851	1	1	1	1
negative regulation of oxidoreductase activity	0.0502205	1	1	1	1
stem cell proliferation	0.0513135	1	1	1	1
leukocyte apoptotic process	0.0513744	1	1	1	1
adaptive immune response	0.0514072	1	0.0525039	1	0.0734658
detection of stimulus involved in sensory perception of pain	0.05165	1	1	1	1
positive regulation of fat cell differentiation	0.0516642	1	0.0153986	1	1
regulation of myeloid cell apoptotic process	0.0520378	1	1	1	1
cell junction assembly	0.0520687	1	1	1	1
negative regulation of microtubule polymerization	0.0526744	1	1	1	1
cardiac muscle cell development	0.0528533	1	1	1	1
thyroid hormone metabolic process	0.0529362	1	1	1	0.0530911
cellular response to estradiol stimulus	0.0529418	1	1	1	1
neural nucleus development	0.0539158	1	1	1	1
regulation of synapse structure or activity	0.0540158	1	1	1	1
cell communication by electrical coupling	0.0546637	1	1	1	1
progesterone metabolic process	0.0549637	1	1	1	1
cellular amine metabolic process	0.0561954	1	0.0228809	1	1
cardiac muscle tissue development	0.0561954	1	1	1	1
dicarboxylic acid catabolic process	0.0571172	1	1	1	1
steroid biosynthetic process	0.0573826	1	1	1	1
mast cell degranulation	0.0585159	1	0.0217776	1	1
behavioral fear response	0.0590738	1	1	1	1
fear response	0.0597927	1	1	1	1
cell-substrate adhesion	0.0597973	1	1	1	1
regulation of circadian sleep/wake cycle	0.0599764	1	1	1	1
regulation of Wnt signaling pathway, planar cell polarity pathway	0.0602233	1	1	1	1
skeletal muscle organ development	0.0610363	1	1	1	1
negative regulation of cyclase activity	0.061166	1	1	1	1
carbohydrate metabolic process	0.0628711	1	1	1	1
chondrocyte proliferation	0.0633826	1	1	1	1
negative regulation of phosphate metabolic process	0.06472	1	1	1	1
regulation of lipoprotein particle clearance	0.0649584	1	1	1	1
negative regulation of T cell mediated immunity	0.0650799	1	1	1	1
axon ensheathment in central nervous system	0.0671182	1	1	1	1
regulation of miRNA transcription	0.0673375	1	1	1	1
aging	0.067564	1	1	1	1
animal organ regeneration	0.0680325	1	1	1	1
regulation of collagen metabolic process	0.0680417	1	1	1	1
miRNA transcription	0.0680618	1	1	1	1
epidermis development	0.0680618	1	0.0654939	1	1
melanocyte differentiation	0.0684613	1	1	1	1
regulation of leukocyte apoptotic process	0.0687011	1	1	1	1
myeloid cell apoptotic process	0.0690658	1	1	1	1
regulation of fatty acid metabolic process	0.0694124	1	0.0742876	1	1
muscle structure development	0.070494	1	0.0424654	1	1
postsynaptic specialization organization	0.0705759	1	1	1	1
antifungal innate immune response	0.0711233	1	1	1	0.0318334
positive regulation of dendrite extension	0.0713751	1	1	1	1
regulation of purine nucleotide metabolic process	0.0721315	1	0.0607879	1	1
epithelial tube branching involved in lung morphogenesis	0.073184	1	1	1	1
secretory granule localization	0.073766	1	1	1	1
glycoside metabolic process	0.0746044	1	0.0269208	1	1
olefinic compound metabolic process	0.0755244	1	0.00687721	1	1
negative regulation of inclusion body assembly	0.0769555	1	1	1	1
positive regulation of synapse assembly	0.0770563	1	1	1	1
positive regulation of stem cell differentiation	0.0780576	1	1	1	1
astrocyte differentiation	1	0.0270331	1	1	1
regulation of hemostasis	1	1	0.000702698	1	1
organic acid transport	1	1	0.000702698	1	0.0632603
cellular response to cadmium ion	1	1	0.000846886	1	1
leukocyte activation involved in immune response	1	1	0.00105194	1	0.0618761
positive regulation of cell death	1	1	0.00184295	1	1
neurotransmitter uptake	1	1	0.00232161	1	1
stress response to metal ion	1	1	0.0023959	1	1
detoxification of copper ion	1	1	0.0023959	1	1
stress response to copper ion	1	1	0.0023959	1	1
osteoclast differentiation	1	1	0.0023959	1	1
myeloid leukocyte differentiation	1	1	0.0023959	1	1
regulation of extrinsic apoptotic signaling pathway via death domain receptors	1	1	0.00313484	1	1
regulation of lipid biosynthetic process	1	1	0.00313484	1	1
cellular hormone metabolic process	1	1	0.00314588	1	1
positive regulation of inflammatory response	1	1	0.00417746	1	1
metanephric nephron development	1	1	0.00501196	1	1
cell killing	1	1	0.00520487	1	1
steroid hormone biosynthetic process	1	1	0.00554728	1	1
regulation of B cell differentiation	1	1	0.00833633	1	0.00419946
nitric oxide metabolic process	1	1	0.00861259	1	1
positive regulation of glial cell proliferation	1	1	0.00867606	1	1
response to corticosteroid	1	1	0.00867606	1	1
gland development	1	1	0.00867606	1	1
reactive nitrogen species metabolic process	1	1	0.00964497	1	1
cellular transition metal ion homeostasis	1	1	0.0108244	1	1
innate immune response	1	1	0.0108244	1	1
neuron projection regeneration	1	1	0.0112899	1	1
transition metal ion homeostasis	1	1	0.0112899	1	1
negative regulation of homotypic cell-cell adhesion	1	1	0.0117217	1	1
regulation of leukocyte proliferation	1	1	0.0120171	1	1
regulation of immune effector process	1	1	0.0122119	1	1
primary alcohol metabolic process	1	1	0.0124537	1	0.0772852
leukocyte degranulation	1	1	0.0125901	1	1
neutral lipid metabolic process	1	1	0.0140059	1	1
regulation of cell killing	1	1	0.0157797	1	1
epithelial cell differentiation	1	1	0.0157797	1	1
negative regulation of amyloid fibril formation	1	1	0.0171058	1	1
regulation of glial cell proliferation	1	1	0.018129	1	1
carboxylic acid biosynthetic process	1	1	0.018129	1	1
positive regulation of protein processing	1	1	0.0181823	1	1
type B pancreatic cell proliferation	1	1	0.0181823	1	1
B cell mediated immunity	1	1	0.0181823	1	1
immunoglobulin mediated immune response	1	1	0.0181823	1	1
cellular detoxification	1	1	0.0185391	1	1
negative regulation of bone remodeling	1	1	0.0186126	1	1
immunological memory process	1	1	0.019997	1	1
response to ketone	1	1	0.0230962	1	1
ion homeostasis	1	1	0.0230962	1	1
regulation of cyclin-dependent protein serine/threonine kinase activity	1	1	0.0244111	1	1
regulation of leukocyte mediated cytotoxicity	1	1	0.0269208	1	1
leukocyte mediated cytotoxicity	1	1	0.0269208	1	1
prostanoid metabolic process	1	1	0.0282482	1	1
prostaglandin metabolic process	1	1	0.0282482	1	1
skeletal muscle cell differentiation	1	1	0.0295824	1	1
MHC protein complex assembly	1	1	0.0301011	1	1
peptide antigen assembly with MHC protein complex	1	1	0.0301011	1	1
nitric oxide biosynthetic process	1	1	0.0301011	1	1
oxidative phosphorylation	1	1	0.0303125	1	1
sodium ion export across plasma membrane	1	1	0.0313036	1	1
regulation of epithelial cell differentiation	1	1	0.0313861	1	1
proton transmembrane transport	1	1	0.0336786	1	1
metanephric tubule development	1	1	0.0337085	1	1
metanephric epithelium development	1	1	0.0337085	1	1
metanephric nephron tubule development	1	1	0.0337085	1	1
metanephric nephron epithelium development	1	1	0.0337085	1	1
lipid catabolic process	1	1	0.0341219	1	1
digestive tract development	1	1	0.0343124	1	1
fat cell differentiation	1	1	0.036268	1	1
protein-lipid complex remodeling	1	1	0.0365031	1	1
plasma lipoprotein particle remodeling	1	1	0.0365031	1	1
production of molecular mediator of immune response	1	1	0.0378319	1	1
purinergic nucleotide receptor signaling pathway	1	1	0.0380135	1	1
small molecule catabolic process	1	1	0.0384702	1	1
B cell differentiation	1	1	0.0392552	1	1
prostaglandin biosynthetic process	1	1	0.0396541	1	1
prostanoid biosynthetic process	1	1	0.0396541	1	1
fatty acid transport	1	1	0.0396541	1	1
regulation of calcium ion import	1	1	0.0397362	0.00712391	0.0128637
positive regulation of keratinocyte differentiation	1	1	0.0404632	1	1
fat-soluble vitamin metabolic process	1	1	0.0414673	1	1
vascular process in circulatory system	1	1	0.0424581	1	1
negative regulation of neuron differentiation	1	1	0.0444481	1	1
cellular modified amino acid metabolic process	1	1	0.0449538	1	1
sensory perception of light stimulus	1	1	0.0468875	1	1
integrated stress response signaling	1	1	0.0492564	1	1
negative regulation of MAP kinase activity	1	1	0.0501365	1	1
hydrogen peroxide catabolic process	1	1	0.0504924	1	1
cranial nerve development	1	1	0.0504953	1	1
regulation of nitric oxide metabolic process	1	1	0.0505503	1	1
generation of precursor metabolites and energy	1	1	0.0510534	1	1
retinol metabolic process	1	1	0.052204	1	0.0612905
lysosome localization	1	1	0.052204	1	1
vacuolar localization	1	1	0.052204	1	1
prostate gland morphogenesis	1	1	0.054628	1	1
prostate gland epithelium morphogenesis	1	1	0.054628	1	1
regulation of monooxygenase activity	1	1	0.0556092	1	1
regulation of sterol transport	1	1	0.0556092	1	1
regulation of cholesterol transport	1	1	0.0556092	1	1
positive regulation of endocytosis	1	1	0.0556092	1	1
organic hydroxy compound metabolic process	1	1	0.0556092	1	1
morphogenesis of embryonic epithelium	1	1	0.0565064	1	1
receptor recycling	1	1	0.0629012	1	1
cell migration involved in heart development	1	1	0.0635572	1	1
nucleoside phosphate metabolic process	1	1	0.0639006	1	1
aerobic respiration	1	1	0.0643698	1	1
ATP metabolic process	1	1	0.0685945	1	1
positive regulation of immune response	1	1	0.0692893	1	1
positive regulation of antigen receptor-mediated signaling pathway	1	1	0.0712818	1	1
positive regulation of phospholipase C activity	1	1	0.0728485	1	1
response to electrical stimulus	1	1	0.0730918	1	1
amyloid fibril formation	1	1	0.0742876	1	1
regulation of plasma lipoprotein particle levels	1	1	0.0742876	1	1
midbrain development	1	1	0.0763092	1	1
transition metal ion transport	1	1	0.0786281	1	1
regulation of nitric oxide biosynthetic process	1	1	0.0826032	1	1
visual perception	1	1	1	0.00699912	5.75608e-12
metanephric nephron morphogenesis	1	1	1	0.0190642	1
extracellular transport	1	1	1	0.0358481	1
epithelial cilium movement involved in extracellular fluid movement	1	1	1	0.0497686	1
regulation of urine volume	1	1	1	0.0507483	1
multicellular organismal homeostasis	1	1	1	0.0616274	1
xenobiotic transport	1	1	1	0.0867906	1
regulation of humoral immune response	1	1	1	0.0879819	1
negative regulation of lipase activity	1	1	1	0.0880636	1
phototransduction	1	1	1	1	6.19263e-11
detection of light stimulus	1	1	1	1	4.13926e-09
detection of abiotic stimulus	1	1	1	1	8.99507e-08
detection of external stimulus	1	1	1	1	1.93606e-07
negative regulation of blood coagulation	1	1	1	1	0.000188118
negative regulation of hemostasis	1	1	1	1	0.000188118
negative regulation of coagulation	1	1	1	1	0.00022016
detection of stimulus	1	1	1	1	0.000287556
defense response to Gram-positive bacterium	1	1	1	1	0.00244428
positive regulation of tyrosine phosphorylation of STAT protein	1	1	1	1	0.00388029
terpenoid metabolic process	1	1	1	1	0.00520477
negative regulation of response to wounding	1	1	1	1	0.00739435
regulation of hepatocyte proliferation	1	1	1	1	0.00906301
response to interferon-gamma	1	1	1	1	0.0290737
aminoglycan catabolic process	1	1	1	1	0.0313644
calcium ion import	1	1	1	1	0.0451614
water transport	1	1	1	1	0.046684
macrophage migration	1	1	1	1	0.047791
superoxide anion generation	1	1	1	1	0.0511418
monocarboxylic acid transport	1	1	1	1	0.0511418
triglyceride metabolic process	1	1	1	1	0.0595668
regulation of defense response	1	1	1	1	0.0617198
cellular response to light stimulus	1	1	1	1	0.0618761
response to light stimulus	1	1	1	1	0.0618761
detoxification	1	1	1	1	0.0632603
animal organ formation	1	1	1	1	0.0732495
phenol-containing compound metabolic process	1	1	1	1	0.0772852
monocyte differentiation	1	1	1	1	0.083245
interleukin-6 production	1	1	1	1	0.0895373
regulation of interleukin-6 production	1	1	1	1	0.0895373

## Sheet: GO_BP_age_gsea_down
	Rod	BC	RGC	MG	AC
cytoplasmic translation	1.32423e-10	0.000958913	2.43303e-20	1	1
ribonucleoprotein complex biogenesis	5.8112e-07	1	1	1	1
ncRNA processing	3.92777e-05	1	1	1	1
mitochondrial gene expression	0.000176507	1	5.04847e-05	1	1
rRNA metabolic process	0.000455797	1	0.0138619	1	1
ribosome assembly	0.00067477	1	5.89561e-05	1	1
ribonucleoprotein complex assembly	0.00191508	1	0.00349378	1	1
RNA destabilization	0.00520773	1	1	1	1
mitochondrial respiratory chain complex assembly	0.00593166	1	0.000165027	1	1
nuclear-transcribed mRNA catabolic process	0.0077521	1	1	1	1
modulation by host of viral genome replication	0.0158815	1	1	1	1
ribonucleoprotein complex subunit organization	0.0161874	1	0.00381793	1	1
U2-type prespliceosome assembly	0.0165177	1	1	1	1
intracellular protein transmembrane transport	0.0212269	1	1	1	1
aerobic electron transport chain	0.0253983	1	1	1	1
mitochondrial ATP synthesis coupled electron transport	0.0314081	1	1	1	1
positive regulation of lamellipodium assembly	0.0465706	1	1	1	1
membrane fission	0.0493055	1	1	1	1
histone deubiquitination	0.0512694	1	1	1	1
protein insertion into ER membrane	0.053699	1	1	1	1
regulation of heterochromatin formation	0.0595987	1	1	1	1
regulation of heterochromatin organization	0.0595987	1	1	1	1
detection of chemical stimulus involved in sensory perception	0.0650799	1	1	1	1
positive regulation of chromosome organization	0.0674189	1	1	1	1
homophilic cell adhesion via plasma membrane adhesion molecules	1	0.0140059	1	1	1
Golgi organization	1	0.0192735	1	1	0.0511418
histone H3-K9 modification	1	0.0228809	1	1	1
roof of mouth development	1	0.0228809	1	1	1
negative regulation of nuclear-transcribed mRNA catabolic process, deadenylation-dependent decay	1	0.0259197	1	1	1
neuron projection arborization	1	0.0281692	1	1	1
histone lysine methylation	1	0.0289612	1	1	1
negative regulation of translational initiation	1	0.0318125	1	1	1
synapse assembly	1	0.0396541	1	1	1
activin receptor signaling pathway	1	0.0404632	1	1	1
vocalization behavior	1	0.0450062	1	1	1
negative chemotaxis	1	0.0471031	1	1	1
neuron cell-cell adhesion	1	0.0471728	1	1	1
alternative mRNA splicing, via spliceosome	1	0.0471728	1	1	1
positive regulation of potassium ion transport	1	0.0472627	1	1	1
striatum development	1	0.0489063	1	1	1
post-Golgi vesicle-mediated transport	1	0.0512211	1	1	0.0428812
regulation of alternative mRNA splicing, via spliceosome	1	0.0595735	1	1	1
neuronal action potential	1	0.0619061	1	1	1
phosphatidylinositol phosphate biosynthetic process	1	0.0662867	1	1	1
positive regulation of neuron migration	1	0.0716082	1	1	1
nuclear-transcribed mRNA poly(A) tail shortening	1	0.0724527	1	1	1
RNA polyadenylation	1	0.0750977	1	1	1
clathrin-dependent endocytosis	1	0.0785841	1	1	1
energy derivation by oxidation of organic compounds	1	1	1.22678e-06	1	1
oxidative phosphorylation	1	1	1.50471e-06	1	1
purine nucleoside triphosphate metabolic process	1	1	1.64693e-06	1	1
ribonucleoside triphosphate metabolic process	1	1	1.64693e-06	1	1
ATP metabolic process	1	1	2.59594e-06	1	1
proton motive force-driven ATP synthesis	1	1	8.10052e-06	1	1
synapse organization	1	1	1.18462e-05	1	0.0361226
ribosomal large subunit biogenesis	1	1	1.81216e-05	1	1
axon development	1	1	3.24611e-05	1	1
proton transmembrane transport	1	1	0.000199088	1	1
regulation of apoptotic signaling pathway	1	1	0.000199088	1	1
negative regulation of protein modification process	1	1	0.000244012	1	1
mitochondrion organization	1	1	0.000296955	1	1
regulation of supramolecular fiber organization	1	1	0.000474212	1	1
protein localization to nucleoplasm	1	1	0.000495646	1	1
negative regulation of phosphorus metabolic process	1	1	0.000595419	1	1
regulation of membrane potential	1	1	0.000595419	1	1
ribose phosphate biosynthetic process	1	1	0.000903938	1	1
regulation of intracellular transport	1	1	0.000908946	1	1
regulation of protein localization to Cajal body	1	1	0.000950415	1	1
positive regulation of protein localization to Cajal body	1	1	0.000950415	1	1
neural nucleus development	1	1	0.00101631	1	1
regulation of neuron apoptotic process	1	1	0.00103815	1	1
chaperone-mediated protein folding	1	1	0.00109998	1	0.0895373
neuron apoptotic process	1	1	0.00125124	1	1
regulation of signal transduction by p53 class mediator	1	1	0.0013017	1	1
positive regulation of organelle organization	1	1	0.00211437	1	1
negative regulation of transferase activity	1	1	0.00240038	1	1
regulation of synapse organization	1	1	0.00259702	1	1
positive regulation of establishment of protein localization	1	1	0.00347627	1	1
regulation of cardiac muscle contraction by calcium ion signaling	1	1	0.00386063	1	1
regulation of establishment of protein localization to telomere	1	1	0.00386063	1	1
establishment of protein localization to membrane	1	1	0.00386891	1	1
regulation of trans-synaptic signaling	1	1	0.00621016	1	1
positive regulation of cell-substrate junction organization	1	1	0.00628222	1	1
neuron death	1	1	0.00647692	1	1
microtubule polymerization	1	1	0.00736627	1	1
regulation of synapse assembly	1	1	0.00871465	1	1
protein targeting	1	1	0.00995214	1	1
regulation of synapse structure or activity	1	1	0.00998255	1	1
regulation of cardiac muscle contraction by regulation of the release of sequestered calcium ion	1	1	0.0107132	1	1
rRNA processing	1	1	0.0112933	1	1
protein-containing complex localization	1	1	0.0116379	1	1
mitochondrial transport	1	1	0.0120206	1	1
regulation of actin filament bundle assembly	1	1	0.0125726	1	1
regulation of autophagy	1	1	0.0128014	1	1
regulation of ubiquitin protein ligase activity	1	1	0.0129831	1	1
protein localization to mitochondrion	1	1	0.0155645	1	1
positive regulation of telomerase RNA localization to Cajal body	1	1	0.0156611	1	1
regulation of microtubule polymerization	1	1	0.0156611	1	1
microtubule polymerization or depolymerization	1	1	0.0156611	1	1
layer formation in cerebral cortex	1	1	0.0157773	1	1
cell junction disassembly	1	1	0.0165725	1	1
cellular component maintenance	1	1	0.0171818	1	1
positive regulation of inflammatory response	1	1	0.0173522	1	1
neutrophil chemotaxis	1	1	0.0187787	1	1
learning or memory	1	1	0.0189485	1	1
negative regulation of catabolic process	1	1	0.0189485	1	1
regulation of protein transport	1	1	0.0189485	1	1
regulation of neuron differentiation	1	1	0.0190176	1	1
regulation of proteolysis involved in protein catabolic process	1	1	0.0190176	1	1
positive regulation of response to external stimulus	1	1	0.0192262	1	1
apoptotic mitochondrial changes	1	1	0.0196581	1	1
positive regulation of cellular component biogenesis	1	1	0.0216477	1	1
regulation of signaling receptor activity	1	1	0.0237698	1	1
behavior	1	1	0.0248896	1	1
response to acetylcholine	1	1	0.0294611	1	1
regulation of protein stability	1	1	0.0304485	1	1
regulation of hydrogen peroxide-induced cell death	1	1	0.0328644	1	1
midbrain development	1	1	0.035579	1	1
establishment of protein localization to mitochondrial membrane	1	1	0.0368161	1	1
positive regulation of mitochondrial translation	1	1	0.0368875	1	1
regulation of T cell receptor signaling pathway	1	1	0.0394711	1	1
positive regulation of cation channel activity	1	1	0.0405558	1	1
segmentation	1	1	0.0415592	1	1
neuron projection organization	1	1	0.0415592	1	1
autophagy	1	1	0.0416662	1	1
process utilizing autophagic mechanism	1	1	0.0416662	1	1
regulation of striated muscle contraction	1	1	0.0421255	1	1
chemotaxis	1	1	0.0423135	1	1
cellular cation homeostasis	1	1	0.0426769	1	1
positive regulation of focal adhesion assembly	1	1	0.0449039	1	1
regulation of binding	1	1	0.0449039	1	1
regulation of protein catabolic process	1	1	0.0450237	1	1
acetylcholine receptor signaling pathway	1	1	0.0462424	1	1
regulation of protein polymerization	1	1	0.0466092	1	1
actin filament bundle assembly	1	1	0.0466793	1	1
dopamine secretion	1	1	0.0466822	1	1
regulation of dopamine secretion	1	1	0.0466822	1	1
nucleosome assembly	1	1	0.0475447	1	1
negative regulation of cellular catabolic process	1	1	0.0479671	1	1
negative regulation of response to reactive oxygen species	1	1	0.0504677	1	1
telomerase RNA localization	1	1	0.0507483	1	1
RNA localization to nucleus	1	1	0.0507483	1	1
cellular response to organic cyclic compound	1	1	0.0507483	1	1
neutrophil migration	1	1	0.0523749	1	1
regulation of ion transport	1	1	0.0563393	1	1
thymus development	1	1	0.0572701	1	1
receptor recycling	1	1	0.062006	1	1
somitogenesis	1	1	0.062006	1	1
regulation of synaptic vesicle exocytosis	1	1	0.062006	1	1
establishment of protein localization to telomere	1	1	0.0623402	1	1
RNA 5'-end processing	1	1	0.0623402	1	1
glutathione metabolic process	1	1	0.0632906	1	1
regulation of transmembrane transport	1	1	0.0633912	1	1
response to cocaine	1	1	0.0636877	1	1
regulation of mitochondrial membrane permeability	1	1	0.0651642	1	1
regulation of type B pancreatic cell proliferation	1	1	0.0653616	1	1
cochlea development	1	1	0.0653616	1	1
regulation of secretion by cell	1	1	0.0694165	1	1
ganglion development	1	1	0.0758143	1	1
cellular response to toxic substance	1	1	0.0758143	1	1
NADH regeneration	1	1	0.077868	1	1
canonical glycolysis	1	1	0.077868	1	1
glucose catabolic process to pyruvate	1	1	0.077868	1	1
hepatocyte growth factor receptor signaling pathway	1	1	0.077868	1	1
vesicle-mediated transport in synapse	1	1	0.077868	1	1
regulation of cell junction assembly	1	1	0.0779386	1	1
DNA methylation involved in gamete generation	1	1	0.0783833	1	1
cell recognition	1	1	0.0792465	1	1
regulation of feeding behavior	1	1	0.0800163	1	1
cellular response to growth factor stimulus	1	1	0.0803983	1	1
vacuolar acidification	1	1	0.0805262	1	1
negative regulation of amyloid fibril formation	1	1	0.0813714	1	1
response to hydrogen peroxide	1	1	0.0813714	1	1
receptor localization to synapse	1	1	0.082523	1	1
cellular response to monoamine stimulus	1	1	0.082523	1	1
cellular response to catecholamine stimulus	1	1	0.082523	1	1
negative regulation of transport	1	1	0.0834971	1	1
protein localization to extracellular region	1	1	0.0863824	1	1
regulation of membrane permeability	1	1	0.0867906	1	1
regulation of neutrophil chemotaxis	1	1	0.0884076	1	1
diol biosynthetic process	1	1	0.0884583	1	1
response to monoamine	1	1	0.0884583	1	1
response to catecholamine	1	1	0.0884583	1	1
response to growth factor	1	1	0.0884583	1	1
negative regulation of insulin secretion	1	1	1	0.016866	1
negative regulation of peptide secretion	1	1	1	0.0275203	1
detection of chemical stimulus involved in sensory perception of smell	1	1	1	1	0.000299662
dendrite morphogenesis	1	1	1	1	0.00439289
regulation of microtubule cytoskeleton organization	1	1	1	1	0.00638062
regulation of GTPase activity	1	1	1	1	0.0100605
chromatin organization	1	1	1	1	0.012045
osteoblast differentiation	1	1	1	1	0.0224643
regulation of protein modification by small protein conjugation or removal	1	1	1	1	0.0280507
DNA-templated transcription elongation	1	1	1	1	0.0362299
presynapse assembly	1	1	1	1	0.0511418
positive regulation of catabolic process	1	1	1	1	0.0530911
adherens junction organization	1	1	1	1	0.0632603
regulation of potassium ion transport	1	1	1	1	0.0710588
regulation of potassium ion transmembrane transport	1	1	1	1	0.0734658
cellular senescence	1	1	1	1	0.0734658
regulation of cAMP-mediated signaling	1	1	1	1	0.0743469
peptidyl-lysine modification	1	1	1	1	0.0755149
modulation of chemical synaptic transmission	1	1	1	1	0.0755149
commissural neuron axon guidance	1	1	1	1	0.083245
protein polyubiquitination	1	1	1	1	0.0838193
regulation of translational initiation in response to stress	1	1	1	1	0.0873566
small GTPase mediated signal transduction	1	1	1	1	0.0873566

## Sheet: KEGG_gender_gsea_up
	Rod	Cone	MG
Neuroactive ligand-receptor interaction	9.86407e-05	8.79279e-05	1
Calcium signaling pathway	0.000206431	0.0113943	1
Morphine addiction	0.00153464	0.0169679	1
Glutamatergic synapse	0.00153464	8.79279e-05	1
Nicotine addiction	0.0055778	0.0415138	0.0417075
Salivary secretion	0.0156089	1	1
GABAergic synapse	0.0156089	0.0113943	1
Circadian entrainment	0.0156089	0.000966903	1
Retrograde endocannabinoid signaling	0.0156089	0.0199655	1
Cholinergic synapse	0.0172607	0.0415138	1
Renin secretion	0.0340959	1	1
Protein digestion and absorption	0.0340959	0.075153	1
Dopaminergic synapse	0.0395539	0.0248221	1
Gap junction	0.0558396	0.0253561	1
Malaria	0.0566787	1	1
Mineral absorption	0.0566787	0.0415138	1
Pancreatic secretion	0.0566787	1	1
African trypanosomiasis	0.0695324	1	1
Aldosterone synthesis and secretion	0.0695324	1	1
Cell adhesion molecules	0.0695324	1	1
Oxytocin signaling pathway	0.0695324	1	1
cGMP-PKG signaling pathway	0.0695324	1	1
cAMP signaling pathway	0.0695324	0.0354002	1
Endocrine and other factor-regulated calcium reabsorption	0.0702297	1	1
Gastric acid secretion	0.0702297	1	1
Serotonergic synapse	0.0702297	0.0415138	1
Alcoholism	1	0.0238792	1
Ras signaling pathway	1	0.0248221	1
Phototransduction	1	0.0415138	0.0355789
Phospholipase D signaling pathway	1	0.0415138	1
Focal adhesion	1	0.0794604	1

## Sheet: KEGG_gender_gsea_down
	MG
Herpes simplex virus 1 infection	7.42581e-09
Cytokine-cytokine receptor interaction	2.81492e-07
TNF signaling pathway	0.000329245
NF-kappa B signaling pathway	0.000553602
NOD-like receptor signaling pathway	0.000553602
Viral protein interaction with cytokine and cytokine receptor	0.0346102
Alcoholic liver disease	0.0346102
JAK-STAT signaling pathway	0.039578
C-type lectin receptor signaling pathway	0.0417075
Transcriptional misregulation in cancer	0.0417075
MicroRNAs in cancer	0.0417075
Epstein-Barr virus infection	0.0417075
Proteoglycans in cancer	0.0417075
Human papillomavirus infection	0.0467704
Lipid and atherosclerosis	0.0467929
Human T-cell leukemia virus 1 infection	0.0704434
Kaposi sarcoma-associated herpesvirus infection	0.075703
Pathways in cancer	0.075703
RIG-I-like receptor signaling pathway	0.0790999
Basal cell carcinoma	0.0790999
IL-17 signaling pathway	0.0790999
Osteoclast differentiation	0.0790999
Influenza A	0.0790999

## Sheet: GO_BP_gender_gsea_up
	Rod	Cone	BC	MG	AC
behavior	5.47368e-07	2.58745e-05	1	0.0265821	1
regulation of membrane potential	1.64186e-06	0.000981339	1	0.0766336	1
modulation of chemical synaptic transmission	1.64186e-06	4.57858e-06	1	0.0395699	1
regulation of ion transport	7.98162e-06	0.00296248	1	1	1
synapse organization	5.84143e-05	0.00296248	1	0.0317482	1
G protein-coupled receptor signaling pathway	0.000178066	4.57858e-06	1	1	1
cell morphogenesis involved in neuron differentiation	0.000221199	0.0225303	1	1	1
regulation of ion transmembrane transport	0.000236535	1	1	1	1
taxis	0.000713586	1	1	1	1
synapse assembly	0.000753475	1	1	1	1
regulation of synapse organization	0.000943625	1	1	1	1
regulation of synapse structure or activity	0.00103042	1	1	1	1
synaptic transmission, glutamatergic	0.00162838	0.00296383	1	1	1
central nervous system neuron differentiation	0.00162838	0.0127155	1	1	1
learning	0.00175952	1	1	1	1
potassium ion transmembrane transport	0.00217007	1	1	1	1
potassium ion transport	0.00238499	1	1	1	1
reproductive behavior	0.00271264	1	1	1	1
sensory perception	0.00333939	0.00548204	1	1	1
calcium ion transport	0.00520022	1	1	1	1
blood circulation	0.00640011	1	1	1	1
multicellular organismal signaling	0.00674246	1	1	1	1
cell-cell adhesion via plasma-membrane adhesion molecules	0.0070584	1	1	1	1
regulation of nervous system development	0.0070584	1	1	1	1
blood vessel morphogenesis	0.00980458	1	1	1	1
calcium ion transmembrane transport	0.0169646	1	1	1	1
divalent inorganic cation homeostasis	0.0173014	1	1	1	1
metal ion homeostasis	0.0173014	1	1	1	1
chemical synaptic transmission, postsynaptic	0.0223947	0.0789291	1	1	1
regulation of system process	0.0261479	1	1	1	1
protein demethylation	0.0270436	0.0117538	1	0.0371244	0.0587734
protein dealkylation	0.0270436	0.0117538	1	0.0371244	0.0587734
forebrain development	0.0270436	0.0556355	1	1	1
cell junction assembly	0.0270436	0.0225303	1	1	1
adult behavior	0.0302499	1	1	1	1
cellular divalent inorganic cation homeostasis	0.0382827	1	1	1	1
outflow tract septum morphogenesis	0.0425305	1	1	1	1
transmission of nerve impulse	0.0530093	1	1	1	1
cellular response to copper ion	0.0533586	1	1	1	1
sodium ion transport	0.0533586	1	1	1	1
neuromuscular process	0.0538873	1	1	1	1
positive regulation of axonogenesis	0.0546436	1	1	1	1
cell recognition	0.0546436	1	1	1	1
sodium ion transmembrane transport	0.0546436	1	1	1	1
muscle contraction	0.0560408	1	1	1	1
regulation of neurotransmitter levels	0.0618723	1	1	1	1
oligodendrocyte differentiation	0.063794	1	1	1	1
neurotransmitter transport	0.0651454	1	1	1	1
chloride transport	0.0672533	1	1	1	1
positive regulation of cell projection organization	0.0766072	1	1	1	1
neuron migration	0.0808989	0.0401906	1	1	1
negative regulation of vascular permeability	0.0865464	1	1	1	1
regulation of smooth muscle contraction	0.0901331	1	1	1	1
positive regulation of cell junction assembly	0.0901331	1	1	1	1
regulation of trans-synaptic signaling	1	4.57858e-06	1	1	1
cognition	1	0.00296383	1	1	1
detoxification of copper ion	1	0.00548204	1	1	1
stress response to copper ion	1	0.00548204	1	1	1
regulation of ion transmembrane transporter activity	1	0.00675511	1	1	1
cellular response to cadmium ion	1	0.0117538	1	1	1
regulation of neuron apoptotic process	1	0.014575	1	1	1
demethylation	1	0.0261225	1	0.0461261	1
detoxification of inorganic compound	1	0.0308147	1	1	1
neuron apoptotic process	1	0.0308147	1	1	1
regulation of transporter activity	1	0.0308147	1	1	1
sensory perception of light stimulus	1	1	0.07761	1	1
visual perception	1	1	0.07761	0.000155797	1
detection of light stimulus	1	1	1	0.000182973	1
phototransduction	1	1	1	0.00127811	1
detection of external stimulus	1	1	1	0.0140306	1
detection of abiotic stimulus	1	1	1	0.0314185	1
regulation of androgen receptor signaling pathway	1	1	1	0.0417068	1
postsynaptic membrane organization	1	1	1	0.0561869	1
detection of stimulus	1	1	1	0.0562705	1
postsynaptic membrane assembly	1	1	1	0.0579348	1
synaptic vesicle cycle	1	1	1	0.0643832	1
response to light stimulus	1	1	1	0.0673408	1
histone demethylation	1	1	1	1	0.0587734
histone lysine demethylation	1	1	1	1	0.0587734

## Sheet: GO_BP_gender_gsea_down
	Rod	Cone	BC	MG	HC
dosage compensation	0.00333939	9.89798e-05	0.00754117	1	1
dosage compensation by inactivation of X chromosome	0.00333939	9.89798e-05	0.00754117	1	1
constitutive heterochromatin formation	1	0.0523538	1	0.0684111	1
cytokine-mediated signaling pathway	1	1	1	9.94426e-07	1
innate immune response	1	1	1	1.41247e-06	1
inflammatory response	1	1	1	1.98717e-06	1
cellular response to biotic stimulus	1	1	1	7.94952e-06	1
epigenetic regulation of gene expression	1	1	1	2.87162e-05	0.00280638
cellular response to molecule of bacterial origin	1	1	1	3.78078e-05	1
response to tumor necrosis factor	1	1	1	6.00357e-05	1
viral process	1	1	1	0.000155766	1
regulation of cell activation	1	1	1	0.00017455	1
lymphocyte activation	1	1	1	0.00017455	1
NIK/NF-kappaB signaling	1	1	1	0.000265979	1
leukocyte differentiation	1	1	1	0.000433554	1
ossification	1	1	1	0.000539883	1
epithelial cell development	1	1	1	0.0005429	1
positive regulation of cell adhesion	1	1	1	0.00094448	1
blood vessel development	1	1	1	0.00094448	1
positive regulation of epithelial cell proliferation	1	1	1	0.00100695	1
connective tissue development	1	1	1	0.00127811	1
entry into host	1	1	1	0.00128596	1
G1/S transition of mitotic cell cycle	1	1	1	0.00166251	1
skeletal system development	1	1	1	0.00166251	1
movement in host	1	1	1	0.00173118	1
regulation of defense response	1	1	1	0.00179304	1
cell-cell signaling by wnt	1	1	1	0.00182843	1
positive regulation of locomotion	1	1	1	0.00185059	1
cartilage development	1	1	1	0.00201967	1
leukocyte cell-cell adhesion	1	1	1	0.00220135	1
positive regulation of T cell activation	1	1	1	0.00221029	1
positive regulation of cell migration	1	1	1	0.00221029	1
negative regulation of cell differentiation	1	1	1	0.00221029	1
osteoblast differentiation	1	1	1	0.00231576	1
epithelial cell proliferation	1	1	1	0.0026527	1
tissue morphogenesis	1	1	1	0.0027258	1
cell cycle G1/S phase transition	1	1	1	0.00288322	1
Wnt signaling pathway	1	1	1	0.00299039	1
wound healing	1	1	1	0.00371021	1
positive regulation of immune response	1	1	1	0.00371021	1
skin development	1	1	1	0.00386486	1
negative regulation of immune system process	1	1	1	0.00423684	1
chordate embryonic development	1	1	1	0.00423684	1
cytokine production	1	1	1	0.00440322	1
leukocyte migration	1	1	1	0.00442373	1
cellular response to peptide	1	1	1	0.0046127	1
response to peptide	1	1	1	0.00568019	1
negative regulation of cell cycle	1	1	1	0.00913761	1
cellular response to external stimulus	1	1	1	0.00966046	1
regulation of cytokine production	1	1	1	0.0117044	1
regulation of viral process	1	1	1	0.0199445	1
cellular response to mechanical stimulus	1	1	1	0.0200522	1
regulation of response to biotic stimulus	1	1	1	0.0201754	1
leukocyte chemotaxis	1	1	1	0.0255117	1
regulation of leukocyte proliferation	1	1	1	0.0255117	1
transmembrane receptor protein tyrosine kinase signaling pathway	1	1	1	0.0260792	1
apoptotic signaling pathway	1	1	1	0.0273249	1
negative regulation of G1/S transition of mitotic cell cycle	1	1	1	0.030128	1
epidermis development	1	1	1	0.030128	1
leukocyte proliferation	1	1	1	0.0301966	1
endothelium development	1	1	1	0.0308278	1
heterochromatin organization	1	1	1	0.0314185	1
signal transduction in response to DNA damage	1	1	1	0.0314185	1
negative regulation of cell adhesion	1	1	1	0.0314185	1
regulation of leukocyte differentiation	1	1	1	0.0314185	1
immune response-regulating signaling pathway	1	1	1	0.0317482	1
chemotaxis	1	1	1	0.0334583	1
embryo implantation	1	1	1	0.0371244	1
leukocyte mediated cytotoxicity	1	1	1	0.0371244	1
lipid localization	1	1	1	0.0371244	1
positive regulation of transferase activity	1	1	1	0.0395699	1
lipid transport	1	1	1	0.0400594	1
lymphocyte proliferation	1	1	1	0.0406821	1
epithelial to mesenchymal transition	1	1	1	0.0408551	1
positive regulation of lymphocyte differentiation	1	1	1	0.0418361	1
response to oxygen levels	1	1	1	0.0440229	1
cell killing	1	1	1	0.0446554	1
morphogenesis of a branching structure	1	1	1	0.0449708	1
heterochromatin formation	1	1	1	0.0461359	1
tissue remodeling	1	1	1	0.0461359	1
cell activation involved in immune response	1	1	1	0.0480384	1
positive regulation of kinase activity	1	1	1	0.0485197	1
humoral immune response	1	1	1	0.0561869	1
ribonucleoprotein complex biogenesis	1	1	1	0.0561869	1
response to nutrient	1	1	1	0.0562705	1
regulation of DNA-templated transcription elongation	1	1	1	0.0562705	1
odontogenesis	1	1	1	0.0568215	1
regulation of response to cytokine stimulus	1	1	1	0.0589609	1
positive regulation of protein kinase activity	1	1	1	0.0619049	1
response to extracellular stimulus	1	1	1	0.0623859	1
skin epidermis development	1	1	1	0.0629533	1
midbrain dopaminergic neuron differentiation	1	1	1	0.0629533	1
formation of primary germ layer	1	1	1	0.0629533	1
cell surface receptor signaling pathway involved in heart development	1	1	1	0.0638646	1
T cell mediated cytotoxicity	1	1	1	0.0643832	1
fibroblast proliferation	1	1	1	0.0664259	1
muscle cell proliferation	1	1	1	0.0678973	1
toll-like receptor signaling pathway	1	1	1	0.072365	1
regulation of protein stability	1	1	1	0.0727103	1
regulation of fibroblast proliferation	1	1	1	0.0731155	1
regulation of animal organ morphogenesis	1	1	1	0.0759405	1
regulation of cellular macromolecule biosynthetic process	1	1	1	0.0759405	1
positive regulation of immune effector process	1	1	1	0.0768148	1
regulation of leukocyte mediated cytotoxicity	1	1	1	0.0779247	1
regulation of cell killing	1	1	1	0.0779247	1
positive regulation of response to external stimulus	1	1	1	0.0779247	1
positive regulation of transcription from RNA polymerase II promoter in response to stress	1	1	1	0.0786383	1
regulation of mitotic cell cycle	1	1	1	0.0793403	1
response to interleukin-1	1	1	1	0.0795405	1
negative regulation of viral entry into host cell	1	1	1	0.0802056	1
negative regulation of epithelial cell apoptotic process	1	1	1	0.083002	1
regulation of endocrine process	1	1	1	0.083002	1
regulation of ossification	1	1	1	0.083002	1
response to interferon-beta	1	1	1	0.0836953	1
protein-DNA complex subunit organization	1	1	1	0.0836953	1

## Sheet: KEGG_ageGender_gsea_up
	Rod	Cone	BC	RGC	MG	AC
Ribosome	5.09183e-34	2.92643e-12	1.08786e-17	1	2.88209e-14	1
Coronavirus disease - COVID-19	3.57688e-27	8.24357e-08	5.3564e-10	1	2.80539e-05	1
Retrograde endocannabinoid signaling	8.38036e-05	1	1	1	0.000351845	1
Type II diabetes mellitus	0.000839356	1	1	0.0346577	1	1
Diabetic cardiomyopathy	0.000839356	1	1	1	0.00135766	0.0411017
Oxidative phosphorylation	0.00226039	1	0.000574002	1	1.45558e-06	0.00138141
Fructose and mannose metabolism	0.00477694	0.00787027	1	1	1	0.0736574
Huntington disease	0.00477694	1	0.0406031	1	0.000351845	0.0736707
Thermogenesis	0.0097726	1	0.0170672	1	0.00168966	1
Parkinson disease	0.0128054	1	0.0835582	1	4.35594e-06	0.00237869
Morphine addiction	0.0159051	1	1	1	0.0140511	1
GABAergic synapse	0.0171852	1	1	1	1	1
Glycolysis / Gluconeogenesis	0.0603871	0.0264869	1	1	1	1
Spliceosome	0.0603871	1	0.0373781	1	1	0.0546083
Prion disease	0.0603871	1	1	0.0346577	3.679e-05	0.022289
Inflammatory mediator regulation of TRP channels	0.0646458	1	1	0.0346577	1	1
Protein processing in endoplasmic reticulum	0.0646458	0.0603112	0.0164839	1	1	0.000238859
Taste transduction	0.0756099	1	1	1	0.0397455	1
Legionellosis	1	0.0282552	1	1	1	1
Insulin signaling pathway	1	0.0282552	1	1	1	1
HIF-1 signaling pathway	1	0.048158	1	1	1	1
Longevity regulating pathway - multiple species	1	0.0852233	1	1	1	1
Endocytosis	1	0.0877521	1	0.0186986	1	1
Ribosome biogenesis in eukaryotes	1	1	0.0145187	1	1	0.0484458
Phototransduction	1	1	0.0200055	1	0.00135766	1
Antigen processing and presentation	1	1	1	0.0156124	1	1
Kaposi sarcoma-associated herpesvirus infection	1	1	1	0.0156124	1	1
Neuroactive ligand-receptor interaction	1	1	1	0.0156124	1	1
Human papillomavirus infection	1	1	1	0.0156124	1	1
MAPK signaling pathway	1	1	1	0.0156124	1	1
Cushing syndrome	1	1	1	0.0165532	1	1
Viral carcinogenesis	1	1	1	0.0165532	1	1
Cortisol synthesis and secretion	1	1	1	0.0186986	1	1
Human cytomegalovirus infection	1	1	1	0.0186986	1	1
Aldosterone synthesis and secretion	1	1	1	0.0203486	1	1
Phagosome	1	1	1	0.0240945	1	1
PI3K-Akt signaling pathway	1	1	1	0.0343822	1	1
Type I diabetes mellitus	1	1	1	0.0346577	1	1
p53 signaling pathway	1	1	1	0.0346577	1	1
Cytokine-cytokine receptor interaction	1	1	1	0.0346577	1	1
Circadian entrainment	1	1	1	0.0346577	1	1
Estrogen signaling pathway	1	1	1	0.0346577	1	1
Autophagy - animal	1	1	1	0.0346577	1	0.0673602
Graft-versus-host disease	1	1	1	0.0370608	1	1
Epstein-Barr virus infection	1	1	1	0.0370608	1	1
Rap1 signaling pathway	1	1	1	0.0370608	1	1
Melanoma	1	1	1	0.0417296	1	1
Oxytocin signaling pathway	1	1	1	0.0417296	1	1
Pathways of neurodegeneration - multiple diseases	1	1	1	0.0436838	0.000109307	0.0736707
Cellular senescence	1	1	1	0.0465838	1	1
MicroRNAs in cancer	1	1	1	0.0684195	1	1
EGFR tyrosine kinase inhibitor resistance	1	1	1	0.0735271	1	1
GnRH secretion	1	1	1	0.0761377	0.0667035	1
Measles	1	1	1	0.0761377	1	1
Alzheimer disease	1	1	1	1	2.80539e-05	1
Chemical carcinogenesis - reactive oxygen species	1	1	1	1	0.0023966	1
Serotonergic synapse	1	1	1	1	0.00426774	1
Chemokine signaling pathway	1	1	1	1	0.0100469	1
Amyotrophic lateral sclerosis	1	1	1	1	0.0187739	0.0863957
Melanogenesis	1	1	1	1	0.0336127	1
Cholinergic synapse	1	1	1	1	0.0397455	1
Arrhythmogenic right ventricular cardiomyopathy	1	1	1	1	0.0825914	1
Hippo signaling pathway	1	1	1	1	0.0825914	1
Olfactory transduction	1	1	1	1	0.0837656	1
Cell cycle	1	1	1	1	1	0.0513095
RNA degradation	1	1	1	1	1	0.0562521
Non-alcoholic fatty liver disease	1	1	1	1	1	0.0890287

## Sheet: KEGG_ageGender_gsea_down
	Rod	Cone	BC	RGC	MG	AC
Chemical carcinogenesis - DNA adducts	0.00477694	1	1	1	1	1
Drug metabolism - cytochrome P450	0.00918616	1	1	1	1	1
Bile secretion	0.0603871	1	1	1	1	0.0536173
ECM-receptor interaction	0.0603871	1	1	1	0.0186486	1
Steroid hormone biosynthesis	0.0611653	1	1	1	1	1
Intestinal immune network for IgA production	0.0742266	1	0.0200055	1	1	1
One carbon pool by folate	0.0756099	1	1	1	1	1
Metabolism of xenobiotics by cytochrome P450	0.0824799	1	1	1	1	1
Complement and coagulation cascades	1	0.0264869	1	1	1	0.00237869
Nicotine addiction	1	0.048158	1	1	1	1
Inflammatory bowel disease	1	0.0603112	0.024076	1	1	1
Graft-versus-host disease	1	0.0891145	1	1	1	1
Cytokine-cytokine receptor interaction	1	1	0.0170672	1	1	1
Hematopoietic cell lineage	1	1	0.0200055	1	0.0242544	1
Vascular smooth muscle contraction	1	1	0.0229864	1	1	1
Rheumatoid arthritis	1	1	0.0312196	1	1	1
Protein digestion and absorption	1	1	0.0373781	1	1	0.0736707
Systemic lupus erythematosus	1	1	0.0835582	1	1	1
Leukocyte transendothelial migration	1	1	0.0835582	1	1	1
Olfactory transduction	1	1	1	0.0156124	1	1
ABC transporters	1	1	1	0.0393366	1	0.022289
Osteoclast differentiation	1	1	1	1	0.000236342	1
Amphetamine addiction	1	1	1	1	0.0140511	1
Proximal tubule bicarbonate reclamation	1	1	1	1	0.0210271	1
Viral myocarditis	1	1	1	1	0.0397604	1
Parathyroid hormone synthesis, secretion and action	1	1	1	1	0.0409532	1
PI3K-Akt signaling pathway	1	1	1	1	0.0602215	1

[truncated: 2 more sheets: GO_BP_ageGender_gsea_up, GO_BP_ageGender_gsea_down]
