# Supplementary material for: Integrated multi-omics single cell atlas of the human retina
Source: Research Square preprint supplement (doi:10.21203/rs.3.rs-3471275/v1), 2023-11-16
Supplement: Supplementary file 5 [file 4c3826e51d595251a4aa048a.xlsx]

## Sheet: Rod age gender interaction DEG
Table S19. Results of differential gene expression analysis of interaction between aging and gender by LMM
	logFC	AveExpr	t	P.Value	adj.P.Val	B	z.std	qval
RBCK1	0.305648	4.74519	7.58348	1.10287e-11	1.39656e-07	16.1046	6.79239	7.51054e-08
SP110	-1.02215	3.25115	-7.59991	1.55148e-11	1.39656e-07	15.9531	-6.743	7.51054e-08
KCNMB2	-1.17713	3.32598	-7.46661	2.52946e-11	1.51793e-07	15.3744	-6.67165	8.16322e-08
LINGO1	0.570098	4.24385	6.93091	2.82147e-10	1.26987e-06	13.007	6.30828	6.82921e-07
CBFA2T3	0.755482	1.23482	6.74622	6.98145e-10	2.51374e-06	12.0493	6.16651	1.35186e-06
EVA1C	-0.926256	3.02056	-6.66786	1.02379e-09	3.07187e-06	11.813	-6.10566	1.65201e-06
AC008080.4	-1.08763	0.293026	-6.6597	1.24292e-09	3.1966e-06	10.9782	-6.07461	1.71909e-06
GMDS	0.794093	3.7915	6.57154	1.64016e-09	3.41332e-06	11.3296	6.02994	1.83564e-06
AC077690.1	-0.908375	4.43056	-6.57735	1.70637e-09	3.41332e-06	11.333	-6.02355	1.83564e-06
LINC02221	-1.44405	-0.0622385	-6.5076	2.45436e-09	4.41859e-06	10.0532	-5.96447	2.37626e-06
AC009950.1	-0.759983	3.73601	-6.47005	2.80826e-09	4.5961e-06	10.8541	-5.94243	2.47172e-06
CEMIP	-0.82141	5.15996	-6.4063	4.29637e-09	6.44563e-06	10.5264	-5.87236	3.46638e-06
BTD	-0.473946	8.28801	-6.2276	9.51306e-09	1.31741e-05	9.6174	-5.73919	7.08487e-06
NIPAL4	-0.996645	1.8278	-6.21468	1.05952e-08	1.36246e-05	9.50324	-5.72092	7.32715e-06
DIRAS3	-0.606481	2.55154	-6.16439	1.24965e-08	1.49983e-05	9.39291	-5.69281	8.06589e-06
SP140	-0.825955	4.24631	-6.13987	1.38365e-08	1.54847e-05	9.3726	-5.6754	8.32747e-06
KCNMB2-AS1	-0.919516	4.66987	-6.10322	1.54749e-08	1.54847e-05	9.21963	-5.65621	8.32747e-06
SP140L	-1.08409	2.18967	-6.1095	1.54821e-08	1.54847e-05	9.1389	-5.65613	8.32747e-06
MED16	0.641595	3.36991	6.09649	1.67557e-08	1.58765e-05	9.16842	5.64254	8.53816e-06
AC103808.4	-1.21933	-0.308172	-6.08348	1.88298e-08	1.66565e-05	8.39171	-5.62242	8.95767e-06
UBE2Z	0.235695	4.57717	6.0515	2.01609e-08	1.66565e-05	8.95007	5.61062	8.95767e-06
LINC01844	-0.529418	5.92357	-6.06842	2.03546e-08	1.66565e-05	8.97852	-5.60896	8.95767e-06
FRMD4B	-0.376884	9.08171	-6.0331	2.31337e-08	1.81076e-05	8.72256	-5.58677	9.73805e-06
LINC01798	-1.05587	5.89486	-6.00496	2.6204e-08	1.96563e-05	8.7311	-5.56507	1.05709e-05
C7orf33	-1.10724	1.8941	-5.8773	4.37448e-08	3.15015e-05	8.1949	-5.47503	1.69411e-05
ADRB2	-0.980991	0.918238	-5.87849	4.87892e-08	3.37828e-05	7.99554	-5.45567	1.81679e-05
AC007218.1	-1.64501	0.583465	-5.79259	6.64346e-08	4.42971e-05	7.52122	-5.40056	2.38224e-05
EIPR1	0.304091	5.57822	5.76416	7.49689e-08	4.82023e-05	7.6506	5.37884	2.59226e-05
SH3TC2-DT	-0.680134	6.82355	-5.77746	7.83983e-08	4.86691e-05	7.6772	-5.37078	2.61736e-05
MIR2052HG	-1.46193	3.64629	-5.73528	8.55416e-08	5.13335e-05	7.64503	-5.35503	2.76065e-05
SLC5A9	-0.849316	1.57316	-5.70691	9.7563e-08	5.66589e-05	7.37012	-5.33121	3.04704e-05
SCAT8	-0.912823	1.79063	-5.60085	1.66806e-07	9.38443e-05	6.96447	-5.23297	5.04682e-05
AC138649.1	0.412102	4.64598	5.57062	1.86e-07	9.77839e-05	6.86701	5.21281	5.25869e-05
LINC02112	-1.37773	2.85371	-5.5691	1.88325e-07	9.77839e-05	6.8976	-5.21051	5.25869e-05
FAAP20	0.404393	4.08676	5.56804	1.90104e-07	9.77839e-05	6.87452	5.20876	5.25869e-05
C3orf18	0.351246	3.52654	5.55356	1.96283e-07	9.81579e-05	6.84579	5.20282	5.2788e-05
AC005229.5	-1.0988	3.74378	-5.51693	2.2712e-07	0.000104046	6.73625	-5.17565	5.59544e-05
AC006974.2	-1.38901	-0.644336	-5.51801	2.27152e-07	0.000104046	6.03116	-5.17562	5.59544e-05
GRIN2A	-1.39663	3.84408	-5.5284	2.29519e-07	0.000104046	6.75606	-5.17369	5.59544e-05
AGL	0.606037	6.20975	5.52631	2.31174e-07	0.000104046	6.58308	5.17235	5.59544e-05
TRMT11	-0.301851	7.70358	-5.50767	2.50817e-07	0.000110133	6.46517	-5.15709	5.92281e-05
PPP1R16A	0.333889	4.91498	5.50455	2.57181e-07	0.000110239	6.56913	5.15239	5.92849e-05
TAF1C	0.525255	2.84635	5.44265	3.13116e-07	0.000131094	6.41612	5.11538	7.05004e-05
HTR4	-0.970671	4.4334	-5.44022	3.2575e-07	0.000133284	6.34664	-5.10791	7.16781e-05
CYP2C8	-0.717469	2.53033	-5.42875	3.46801e-07	0.000138743	6.34312	-5.09606	7.46143e-05
AC061958.1	-1.10879	3.48819	-5.41417	3.55654e-07	0.000139192	6.3158	-5.09128	7.48556e-05
CLPTM1L	0.456058	2.90043	5.38558	4.03864e-07	0.000154697	6.16135	5.06713	8.31941e-05
SEMA6A-AS2	-0.948839	-0.297737	-5.36569	4.46009e-07	0.000167072	5.59967	-5.04819	8.98492e-05
AL590807.1	-0.662646	2.88755	-5.3767	4.62925e-07	0.000167072	6.10816	-5.04107	8.98492e-05
AL392086.3	-0.815014	7.45693	-5.36261	4.64012e-07	0.000167072	5.89169	-5.04063	8.98492e-05
AC104688.1	-1.04646	1.68941	-5.35761	4.84005e-07	0.000169228	5.94793	-5.03255	9.10088e-05
MFSD4B	-0.275031	7.5408	-5.36029	4.88801e-07	0.000169228	5.84766	-5.03066	9.10088e-05
IRF3	0.547645	4.81687	5.32805	5.2181e-07	0.000174209	5.849	5.01811	9.3687e-05
AC010333.2	-0.593864	3.54068	-5.34753	5.22538e-07	0.000174209	5.98031	-5.01785	9.3687e-05
DNAJB2	0.412678	5.0706	5.33893	5.3576e-07	0.000175063	5.86655	5.01304	9.41465e-05
AC073111.4	0.517147	1.88085	5.32307	5.44549e-07	0.000175063	5.92862	5.00991	9.41465e-05
UBXN6	0.389854	4.13663	5.30437	6.04457e-07	0.000190112	5.77543	4.98979	0.00010224
SLC7A13	-1.09265	-0.346056	-5.30772	6.12482e-07	0.000190112	5.38157	-4.98724	0.00010224
KCNH8	-1.24694	4.86857	-5.27696	6.5119e-07	0.000198701	5.68411	-4.97538	0.000106859
AL157834.1	-0.641077	4.67627	-5.27916	6.89044e-07	0.000206748	5.64396	-4.96443	0.000111186
DDX55	0.357652	4.84158	5.2489	7.34842e-07	0.000216875	5.53233	4.95192	0.000116632
MPP4	-0.441732	9.78319	-5.2506	7.58553e-07	0.000220262	5.3428	-4.94574	0.000118454
AL049828.1	-0.480811	6.10438	-5.23848	7.87032e-07	0.000224904	5.40309	-4.93856	0.00012095
LINC02096	-0.909102	2.27199	-5.22153	8.46208e-07	0.000238036	5.4868	-4.9244	0.000128012
GLIPR1L1	-0.808645	2.51795	-5.22094	8.95509e-07	0.000245021	5.48724	-4.91331	0.000131769
NXPH2	-1.07718	1.67456	-5.20238	8.98259e-07	0.000245021	5.4254	-4.91271	0.000131769
ELFN1	0.400186	5.07516	5.18596	9.6911e-07	0.000260401	5.23331	4.89781	0.00014004
RBPMS	-0.913168	3.16022	-5.17101	1.02866e-06	0.00026925	5.35286	-4.88608	0.000144799
IFT27	0.305053	4.58769	5.18035	1.03195e-06	0.00026925	5.24073	4.88545	0.000144799
GLIPR1L2	0.938377	2.02384	5.15891	1.10033e-06	0.000280561	5.27784	4.87279	0.000150882
LRRC3B	-1.05474	2.12268	-5.15411	1.10647e-06	0.000280561	5.26201	-4.87169	0.000150882
AC024560.1	1.66937	-0.773701	5.1506	1.12336e-06	0.000280887	4.78256	4.8687	0.000151057
RXRA	0.451353	3.81798	5.14326	1.16717e-06	0.000287843	5.14801	4.86113	0.000154798
HEMK1	0.354629	3.49731	5.14677	1.20213e-06	0.00029042	5.16304	4.85529	0.000156184
SPATC1L	1.038	-0.037956	5.13336	1.20988e-06	0.00029042	5.05969	4.85401	0.000156184
SAYSD1	0.534636	1.57489	5.12443	1.2901e-06	0.000302075	5.09112	4.84127	0.000162452
LINC01797	-1.48375	0.551116	-5.13576	1.292e-06	0.000302075	4.88982	-4.84098	0.000162452
PSG8	-0.667416	2.1465	-5.12875	1.32993e-06	0.000306106	5.11959	-4.83523	0.00016462
ADM5	0.711278	1.21811	5.11199	1.34324e-06	0.000306106	5.0354	4.83325	0.00016462
HDAC7	0.57921	2.30374	5.09857	1.42942e-06	0.000321672	5.04554	4.82086	0.000172991
AP000844.2	-0.580289	4.87224	-5.10723	1.50087e-06	0.000333583	4.95687	-4.81112	0.000179396
AL137182.1	-0.520987	2.73833	-5.08871	1.62444e-06	0.000356645	4.95662	-4.79528	0.000191799
ARNT	-0.218908	7.15978	-5.07755	1.65674e-06	0.000359352	4.69638	-4.79134	0.000193255
CENPV	0.38807	3.6226	5.0523	1.75364e-06	0.000375842	4.7815	4.77992	0.000202123
LTB4R	0.540574	3.10958	5.04219	1.87991e-06	0.000398165	4.76271	4.76592	0.000214128
LINC01828	-1.41573	-0.701896	-5.02387	2.02323e-06	0.000423537	4.18547	-4.75109	0.000227773
DAZAP1	0.264101	4.60637	5.00656	2.11586e-06	0.000437837	4.53975	4.74203	0.000235463
LYZL4	1.81425	1.37895	5.00212	2.15862e-06	0.000441609	4.62113	4.73798	0.000237492
AP002370.2	-0.838608	3.50977	-5.00519	2.19626e-06	0.000444262	4.63267	-4.73447	0.000238918
PCBP4	0.440759	8.00843	4.98127	2.41182e-06	0.000478812	4.2724	4.71545	0.000257499
TMEM185A	0.292794	2.84079	4.97565	2.42026e-06	0.000478812	4.54671	4.71473	0.000257499
AC115837.2	-1.59365	-0.344568	-4.96095	2.52184e-06	0.000493485	4.19315	-4.70636	0.00026539
ANTXR2	-1.3259	5.26712	-4.95367	2.62455e-06	0.000508062	4.34068	-4.69821	0.000273229
CAPN5	1.42632	0.490799	4.94687	2.67607e-06	0.000512525	4.38636	4.69423	0.000275629
PCCA-DT	-0.396686	5.23343	-4.94843	2.71099e-06	0.000513747	4.30031	-4.69158	0.000276287
INTS11	0.253034	4.6026	4.92512	3.02398e-06	0.00056709	4.21833	4.66918	0.000304973
TYMSOS	-0.688586	4.99896	-4.91003	3.12538e-06	0.000580063	4.20158	-4.6624	0.00031195
PUM3	-0.653817	8.27411	-4.91709	3.23241e-06	0.000593807	4.02893	-4.65547	0.000319341
OR2M4	-0.987555	-0.182123	-4.89651	3.34648e-06	0.000608552	3.99891	-4.64832	0.000327271
KLC2	0.339004	4.19304	4.88896	3.57722e-06	0.000640561	4.10802	4.63455	0.000344485
LINC00707	-1.07201	2.6843	-4.89391	3.59366e-06	0.000640561	4.21339	-4.6336	0.000344485
AC100791.1	1.00757	0.61842	4.86743	3.86962e-06	0.000678712	4.09781	4.61826	0.000365002
AC067956.1	-1.1701	0.103452	-4.85974	3.91854e-06	0.000678712	3.91061	-4.61566	0.000365002
HNRNPH1	0.497556	7.33685	4.86153	3.92079e-06	0.000678712	3.81137	4.61554	0.000365002
FMO5	-0.61717	3.38152	-4.85995	4.11668e-06	0.000705835	4.04544	-4.6054	0.000379589
AL109838.1	-0.720453	2.15692	-4.85311	4.23339e-06	0.000713269	4.05293	-4.59958	0.000383587
AP000317.1	-0.702112	1.12732	-4.84303	4.23928e-06	0.000713269	3.95157	-4.59929	0.000383587
XPO1	0.28016	7.66095	4.83084	4.50511e-06	0.000750976	3.68099	4.58661	0.000403865
AC027808.2	-0.632578	2.19329	-4.81671	4.85896e-06	0.000796661	3.91885	-4.57079	0.000428433
AP001107.5	1.38148	-0.351208	4.80418	4.86767e-06	0.000796661	3.61185	4.57041	0.000428433
LHFPL3-AS1	-0.479654	7.46232	-4.81203	5.0255e-06	0.000808565	3.63376	-4.56372	0.000434836
R3HDM4	0.324447	2.56846	4.79975	5.05029e-06	0.000808565	3.84534	4.56269	0.000434836
PPEF2	-0.603753	10.2321	-4.8023	5.07515e-06	0.000808565	3.52465	-4.56166	0.000434836
ACSM3	-0.545197	2.11495	-4.7934	5.35869e-06	0.00084625	3.82483	-4.55023	0.000455102
RSRP1	-0.350221	6.95188	-4.78043	5.50714e-06	0.000862131	3.52941	-4.54448	0.000463642
AC093010.2	-1.02278	-0.610452	-4.77095	5.58987e-06	0.000867539	3.4509	-4.54134	0.000466551
AC079177.1	-0.681574	3.24423	-4.77426	5.66026e-06	0.000870955	3.73315	-4.5387	0.000468388
LINC00499	-1.03211	0.659549	-4.76197	5.97647e-06	0.000911817	3.62341	-4.52722	0.000490363
SMIM2-AS1	0.923561	0.91344	4.74466	6.21903e-06	0.00094085	3.63517	4.5188	0.000505977
ADAM19	-0.2994	7.92244	-4.74404	6.54501e-06	0.000981914	3.34733	-4.50797	0.000528061
AL353052.1	-0.796722	0.237456	-4.7288	6.77268e-06	0.00100767	3.40671	-4.50071	0.000541914
WAKMAR2	-0.538057	6.2966	-4.72535	6.98672e-06	0.00100999	3.34278	-4.49409	0.000543157
MOB2	0.297921	4.0517	4.71642	6.99607e-06	0.00100999	3.43526	4.49381	0.000543157
MTHFD1	-0.44692	4.23151	-4.71527	7.00491e-06	0.00100999	3.47408	-4.49354	0.000543157
C9orf92	-1.18023	1.3938	-4.71497	7.01262e-06	0.00100999	3.53994	-4.49331	0.000543157
AL355488.1	0.463884	2.12291	4.70592	7.34287e-06	0.00104916	3.49271	4.4835	0.000564222
ASIC4	0.684999	1.5472	4.69443	7.62696e-06	0.00108117	3.50319	4.4754	0.000581437
CDHR3	2.08923	-0.0895484	4.67001	8.57647e-06	0.00119675	3.28073	4.45026	0.000643599
COQ4	0.273653	5.48619	4.66471	8.60943e-06	0.00119675	3.16457	4.44944	0.000643599
TOB2	0.286013	6.94711	4.66552	8.64179e-06	0.00119675	3.07178	4.44863	0.000643599
AC005592.2	-0.878778	-0.473826	-4.66334	8.89796e-06	0.00122282	3.05261	-4.44236	0.000657618
AP000844.1	-0.599445	3.67356	-4.66544	9.05597e-06	0.00123179	3.29846	-4.43857	0.000662438
ARFGAP1	0.404158	3.94648	4.65828	9.10001e-06	0.00123179	3.2241	4.43752	0.000662438
AC068051.1	-0.711935	4.65719	-4.65675	9.34147e-06	0.00125503	3.18117	-4.43188	0.00067494
CHODL-AS1	-0.920433	0.865173	-4.65496	9.47443e-06	0.00126347	3.28433	-4.42883	0.000679476
AC012464.1	-0.574543	3.46867	-4.63385	1.03721e-05	0.00137301	3.16692	-4.40927	0.000738387
NPIPA5	0.534808	1.19905	4.61461	1.08483e-05	0.00141122	3.19903	4.39954	0.000758934
AC093766.1	-1.058	-0.563823	-4.60916	1.10553e-05	0.00141122	2.90259	-4.39543	0.000758934
PUDP	-0.252446	6.19403	-4.61565	1.10732e-05	0.00141122	2.91632	-4.39508	0.000758934
AL121935.1	-0.747144	2.17467	-4.6125	1.11178e-05	0.00141122	3.16263	-4.39421	0.000758934
AL121601.1	0.59953	1.14574	4.60642	1.11243e-05	0.00141122	3.11681	4.39408	0.000758934
NUDT7	0.445565	3.15642	4.6003	1.11854e-05	0.00141122	3.07193	4.39289	0.000758934
ARHGAP45	0.666252	5.57171	4.60056	1.12095e-05	0.00141122	2.88852	4.39242	0.000758934
CCDC198	-0.73507	0.426876	-4.6041	1.1573e-05	0.00144687	3.04777	-4.38548	0.000778105
AC099788.1	-0.524023	5.03657	-4.60127	1.17998e-05	0.00146504	2.93181	-4.38126	0.00078788
TATDN1	0.237991	4.86213	4.58227	1.20273e-05	0.00148307	2.87585	4.37709	0.000797576
PRR34-AS1	0.680817	1.62203	4.58912	1.21215e-05	0.00148363	3.05895	4.37539	0.000797878
DUT	0.325827	5.02878	4.58409	1.22706e-05	0.00148363	2.86276	4.37272	0.000797878
AC090518.1	-0.553502	4.38799	-4.58689	1.23337e-05	0.00148363	2.93175	-4.3716	0.000797878
AC108448.3	1.27037	-0.0523844	4.57716	1.23615e-05	0.00148363	2.99724	4.37111	0.000797878
PLD6	0.575358	0.668184	4.57925	1.26621e-05	0.00150964	2.98801	4.36587	0.000811862
AC103808.1	-1.05173	1.10348	-4.56864	1.29485e-05	0.00153363	2.93773	-4.36097	0.000824765
CCNB3	-0.512893	1.91181	-4.57504	1.30548e-05	0.00153612	3.01927	-4.35918	0.000826104
C7orf69	-0.66548	0.259089	-4.55666	1.33225e-05	0.00155687	2.89574	-4.35474	0.000837265
AC003035.2	-0.861356	1.93252	-4.55361	1.34869e-05	0.00155687	2.97721	-4.35205	0.000837265
PI15	-1.23216	-0.888738	-4.55679	1.34906e-05	0.00155687	2.61865	-4.35199	0.000837265
ARVCF	0.291017	2.8928	4.55021	1.38027e-05	0.00157588	2.89157	4.34698	0.000847485
GOLM1	-0.359789	4.08624	-4.54828	1.38304e-05	0.00157588	2.83497	-4.34654	0.000847485
LINC00457	-1.71428	3.71859	-4.54337	1.40515e-05	0.001591	2.83301	-4.34306	0.000855617
PIP4K2C	-0.263586	4.64097	-4.54753	1.43612e-05	0.0016159	2.76863	-4.33826	0.000869012
TYMS	-0.404593	2.5759	-4.52756	1.52462e-05	0.00169801	2.84228	-4.3251	0.000913169
CMTM2	-0.744855	1.4255	-4.53036	1.52796e-05	0.00169801	2.85091	-4.32462	0.000913169
GNG12-AS1	-0.493192	8.02783	-4.52527	1.57926e-05	0.00174426	2.5153	-4.31733	0.000938038
OMG	-0.596838	4.78849	-4.51632	1.63453e-05	0.00179429	2.6687	-4.30973	0.000964948
MRPL23	0.776296	2.09292	4.51424	1.64953e-05	0.00179979	2.79685	4.30771	0.000967904
SH3TC2	-0.48133	7.76875	-4.49891	1.70495e-05	0.00184905	2.41793	-4.30039	0.000994392
AC007681.1	-0.399393	6.24314	-4.4945	1.74642e-05	0.00188268	2.47241	-4.29507	0.00101248
SGO2	0.57328	2.77552	4.4863	1.76444e-05	0.00189078	2.67233	4.29279	0.00101684
AL357507.1	-0.668143	0.399739	-4.48354	1.79031e-05	0.00189633	2.61121	-4.28956	0.00101982
NEDD9	-0.57976	4.77966	-4.49068	1.79068e-05	0.00189633	2.55168	-4.28951	0.00101982
TMEM260	0.24001	5.87904	4.48158	1.86104e-05	0.00195932	2.42166	4.28094	0.0010537
CCR6	-0.425629	2.2626	-4.47369	1.87661e-05	0.00196422	2.65622	-4.27909	0.00105633
SLC1A7	0.245199	7.15487	4.47008	1.92507e-05	0.00199921	2.31497	4.27341	0.00107515
VEPH1	-0.819554	1.29068	-4.47334	1.94021e-05	0.00199921	2.63707	-4.27166	0.00107515
MIIP	0.343284	3.52197	4.46474	1.94335e-05	0.00199921	2.54784	4.2713	0.00107515
LTBP3	0.398855	2.91476	4.45655	1.99354e-05	0.00200598	2.56317	4.26561	0.00107879
TBPL2	-0.90978	0.897586	-4.45479	1.99922e-05	0.00200598	2.56888	-4.26498	0.00107879
AC008700.1	-0.763646	3.2177	-4.46559	2.01802e-05	0.00200598	2.58061	-4.26289	0.00107879
TRPC5	-0.745332	1.63765	-4.45923	2.03328e-05	0.00200598	2.60136	-4.2612	0.00107879
KCNIP2	0.434559	2.5583	4.44905	2.04538e-05	0.00200598	2.54049	4.25988	0.00107879
HAR1A	0.819815	0.857111	4.45346	2.04903e-05	0.00200598	2.56062	4.25948	0.00107879
LINC02352	0.705488	-0.0585212	4.4488	2.05439e-05	0.00200598	2.44814	4.2589	0.00107879
TRIM41	0.292012	3.62022	4.44727	2.05964e-05	0.00200598	2.4682	4.25833	0.00107879
NCAPH2	0.339505	3.16901	4.44632	2.07375e-05	0.00200598	2.5026	4.2568	0.00107879
PLCH2	0.397635	6.67375	4.44835	2.07548e-05	0.00200598	2.25729	4.25661	0.00107879
AC091946.1	-0.494005	5.81494	-4.46542	2.08086e-05	0.00200598	2.41051	-4.25603	0.00107879
INPP4B	-0.774443	3.73937	-4.45617	2.08365e-05	0.00200598	2.49	-4.25573	0.00107879
C2orf88	-0.49354	5.46272	-4.44402	2.11891e-05	0.00201638	2.34601	-4.25198	0.00108438
AC114763.1	0.328407	5.48627	4.43977	2.13789e-05	0.00201638	2.29211	4.24998	0.00108438
CDC14B	-0.280617	6.24526	-4.44431	2.13891e-05	0.00201638	2.28454	-4.24987	0.00108438
NCKAP5	-1.03743	4.50853	-4.43767	2.13925e-05	0.00201638	2.4018	-4.24984	0.00108438
SLC38A10	0.307981	3.69607	4.43195	2.18819e-05	0.00205177	2.40348	4.24477	0.00110341
PPDPF	0.758918	4.07528	4.42963	2.25579e-05	0.00210419	2.38346	4.23794	0.00113161
NOP9	0.381625	2.16424	4.42102	2.29796e-05	0.00212926	2.4546	4.23378	0.00114509
LINC00310	-0.579022	1.11932	-4.41875	2.31075e-05	0.00212926	2.4666	-4.23253	0.00114509
MESD	-0.269192	6.15297	-4.42056	2.31814e-05	0.00212926	2.19905	-4.23181	0.00114509
JAKMIP2	-0.685877	6.15941	-4.42958	2.33683e-05	0.00213553	2.27622	-4.23001	0.00114846
KIAA0087	-0.837084	1.34533	-4.4222	2.37767e-05	0.00215125	2.46948	-4.22611	0.00115691
AC108058.1	-0.45166	2.04971	-4.41507	2.3879e-05	0.00215125	2.4441	-4.22514	0.00115691
LINC02153	1.27085	1.08061	4.40954	2.38988e-05	0.00215125	2.4559	4.22496	0.00115691
B4GALT2	0.298887	3.17576	4.40345	2.48105e-05	0.00222221	2.33759	4.21652	0.00119507
ABHD15	0.699877	-0.0381544	4.40083	2.50692e-05	0.00222835	2.32426	4.21418	0.00119838
BIN1	0.325251	6.59416	4.40087	2.51266e-05	0.00222835	2.08062	4.21366	0.00119838
CUL5	-0.175558	7.28468	-4.40415	2.53717e-05	0.00223861	2.0755	-4.21147	0.00120389
YJEFN3	0.451363	3.57708	4.39394	2.5491e-05	0.00223861	2.26631	4.21041	0.00120389
AC004112.1	-0.488453	3.40617	-4.38994	2.58112e-05	0.00225573	2.32612	-4.20759	0.0012131
FAM106C	1.30529	0.540121	4.38507	2.65819e-05	0.00231185	2.32032	4.20093	0.00124328
BCL9L	0.423273	2.02581	4.38068	2.69226e-05	0.00233022	2.32254	4.19805	0.00125316
VEZT	-0.211443	7.91235	-4.3802	2.74547e-05	0.00236156	1.96457	-4.19361	0.00127001
TTC9	-0.513036	2.93825	-4.37358	2.75469e-05	0.00236156	2.26794	-4.19285	0.00127001
ANKRD31	0.42409	3.15302	4.3709	2.78174e-05	0.00236297	2.21738	4.19064	0.00127078
ALDOC	0.49309	7.30532	4.3802	2.79904e-05	0.00236297	1.99957	4.18923	0.00127078
AL035416.1	-0.53649	2.30909	-4.37667	2.80555e-05	0.00236297	2.29602	-4.1887	0.00127078
SGO1-AS1	-0.556709	1.50173	-4.36982	2.80884e-05	0.00236297	2.29827	-4.18844	0.00127078
AC051619.6	0.720091	0.911176	4.36712	2.82228e-05	0.00236323	2.31018	4.18735	0.00127092
AC007279.2	-0.888311	1.94191	-4.36244	2.87428e-05	0.00239563	2.29528	-4.1832	0.00128834
TPD52L2	0.215176	4.93448	4.36742	2.90521e-05	0.00241026	2.08056	4.18077	0.0012962
SLC7A2	-0.257458	6.99131	-4.35787	2.99156e-05	0.00246936	1.91867	-4.17411	0.00132799
HMGB2	0.444396	5.86377	4.35986	3.00389e-05	0.00246936	1.98677	4.17317	0.00132799
RWDD4	0.245739	3.61807	4.34628	3.07852e-05	0.00251921	2.09835	4.16758	0.0013548
RPL8	0.63454	7.12967	4.34542	3.21144e-05	0.00261609	1.89503	4.15793	0.0014069
RPL35	0.629816	6.57415	4.34224	3.24859e-05	0.00262078	1.90741	4.1553	0.00140942
AC092111.1	0.615522	-0.0228833	4.33085	3.2588e-05	0.00262078	2.10546	4.15458	0.00140942
RPL36	0.710232	6.21755	4.33958	3.28252e-05	0.00262078	1.91984	4.15293	0.00140942
ANXA11	-1.65612	-0.120897	-4.3292	3.28357e-05	0.00262078	2.00543	-4.15285	0.00140942
RPL34-AS1	-0.257452	5.82278	-4.33627	3.30369e-05	0.00262078	1.91764	-4.15145	0.00140942
WDR1	0.255252	4.29754	4.33625	3.3119e-05	0.00262078	2.01332	4.15089	0.00140942
IZUMO4	0.357723	2.39604	4.32661	3.3191e-05	0.00262078	2.11817	4.15039	0.00140942
TMX4	-0.299878	6.61984	-4.33236	3.34454e-05	0.00262933	1.8479	-4.14864	0.00141402
AC004076.2	-0.646968	2.32172	-4.32105	3.37842e-05	0.00264442	2.12512	-4.14633	0.00142213
PIEZO1	0.451987	2.45055	4.31837	3.41336e-05	0.00265635	2.07858	4.14398	0.00142855
BET1L	0.294113	3.42022	4.32155	3.44419e-05	0.00265635	2.02967	4.14191	0.00142855
MYLK	-0.356326	5.1543	-4.31538	3.45211e-05	0.00265635	1.88776	-4.14139	0.00142855
CDCA7L	1.29643	2.88389	4.31535	3.45268e-05	0.00265635	2.01109	4.14135	0.00142855
AC008676.1	-0.502427	2.98223	-4.31365	3.48451e-05	0.00266943	2.05601	-4.13924	0.00143559
PPP3CB-AS1	-0.406993	2.62773	-4.32181	3.5108e-05	0.00267476	2.09653	-4.13752	0.00143845
DEF8	0.337024	4.06588	4.31267	3.54356e-05	0.00267476	1.93714	4.13539	0.00143845
ZMAT1	0.308974	6.37636	4.31025	3.55429e-05	0.00267476	1.75944	4.13469	0.00143845
SLC44A5	-0.888876	5.82398	-4.30887	3.56008e-05	0.00267476	1.86177	-4.13432	0.00143845
LINC00970	-0.755308	1.21582	-4.30705	3.56575e-05	0.00267476	2.08912	-4.13395	0.00143845
AL357375.1	-0.69297	3.71418	-4.31648	3.58332e-05	0.00267679	1.97744	-4.13282	0.00143954
AC008080.3	-0.890748	1.43603	-4.3015	3.64293e-05	0.00271007	2.08012	-4.12903	0.00145744
EEF1G	0.531694	6.13437	4.31118	3.65892e-05	0.00271077	1.81838	4.12802	0.00145781
AL157893.2	-0.590608	2.59539	-4.29572	3.73185e-05	0.00275346	2.02666	-4.12348	0.00148078
AC008537.2	-0.698732	0.645257	-4.29365	3.77229e-05	0.00277194	1.98661	-4.121	0.00149071
MRRF	-0.20916	6.07401	-4.29877	3.80912e-05	0.00278763	1.75871	-4.11876	0.00149915
SMYD5	0.377642	1.9583	4.28661	3.87531e-05	0.00282459	1.9987	4.11479	0.00151902
AC007218.2	-1.27895	0.355376	-4.30077	3.92865e-05	0.00285191	1.95834	-4.11164	0.00153372
FOXP4	0.341409	1.66435	4.27933	3.97008e-05	0.00287042	1.96952	4.10921	0.00154367
ERI1	-0.213054	7.11633	-4.28228	4.04949e-05	0.00291612	1.63858	-4.10464	0.00156825
AC008443.5	0.604621	2.5016	4.26674	4.21029e-05	0.00300879	1.90645	4.09563	0.00161809
SH3PXD2A	-0.555266	5.45778	-4.27162	4.22059e-05	0.00300879	1.73057	-4.09506	0.00161809
ACSM6	-0.697835	5.9467	-4.26716	4.24226e-05	0.00300879	1.67554	-4.09387	0.00161809
SLC26A5	-0.372145	4.82607	-4.26645	4.24503e-05	0.00300879	1.72254	-4.09372	0.00161809
AC092966.1	1.45952	0.624203	4.2579	4.32506e-05	0.00305349	1.89995	4.08939	0.00164213
C6orf99	-0.856424	1.89401	-4.25394	4.37654e-05	0.00306886	1.91673	-4.08665	0.00165039
TMEM132A	0.399936	4.9795	4.26066	4.38092e-05	0.00306886	1.68129	4.08641	0.00165039
MGAT3	0.766653	1.39134	4.24906	4.45939e-05	0.00311172	1.87985	4.08229	0.00167344
EVI2B	-0.527307	3.09192	-4.24983	4.63899e-05	0.00322455	1.79994	-4.07311	0.00173412
SLC25A28	0.27416	4.84173	4.24014	4.72353e-05	0.00326584	1.60753	4.0689	0.00175633
AC109927.1	-0.82523	3.75782	-4.23349	4.73468e-05	0.00326584	1.71074	-4.06835	0.00175633
RPL13	0.597851	7.78762	4.24197	4.77394e-05	0.00328035	1.48482	4.06643	0.00176413
ARHGAP28	1.04483	0.588461	4.23176	4.79682e-05	0.00328354	1.78821	4.06531	0.00176584
TBX15	-1.02085	-0.438103	-4.23025	4.85316e-05	0.00330258	1.62776	-4.06259	0.00177608
CSK	0.327501	2.5311	4.22873	4.86132e-05	0.00330258	1.75484	4.0622	0.00177608
AL078581.4	-0.492382	3.3136	-4.23208	4.90231e-05	0.00331103	1.72945	-4.06024	0.00178063
CCDC144A	0.507223	6.73698	4.22591	4.91791e-05	0.00331103	1.4374	4.05949	0.00178063
AC046134.2	-0.199224	8.09433	-4.23346	4.92893e-05	0.00331103	1.42548	-4.05897	0.00178063
AC128707.1	-0.498552	7.95828	-4.22914	5.01963e-05	0.00335942	1.42636	-4.05471	0.00180665
AC084128.1	-0.860455	0.697283	-4.2222	5.05857e-05	0.00337294	1.75887	-4.0529	0.00181392
PIGB	-0.385803	5.47712	-4.22217	5.13385e-05	0.00341051	1.52483	-4.04945	0.00183413
AC107068.1	0.305412	1.8293	4.21214	5.21036e-05	0.00344077	1.73209	4.04598	0.0018504
TNPO1	-0.261208	8.88247	-4.21373	5.21763e-05	0.00344077	1.32591	-4.04566	0.0018504
PCDH12	-0.757595	0.670452	-4.20771	5.24144e-05	0.00344386	1.69799	-4.04459	0.00185206
NFYA	0.289386	3.80752	4.20423	5.2945e-05	0.00345412	1.5532	4.04223	0.00185758
HIST2H2BE	0.539044	3.26191	4.21116	5.29795e-05	0.00345412	1.65518	4.04208	0.00185758
TOMM7	0.570337	5.9492	4.21283	5.31462e-05	0.00345412	1.47134	4.04134	0.00185758
ATAD3A	0.279751	2.94328	4.20488	5.38256e-05	0.00348329	1.64909	4.03836	0.00187327
AL583808.1	-0.557352	6.50185	-4.20907	5.43545e-05	0.00348329	1.42881	-4.03607	0.00187327
OTX2-AS1	-0.348503	10.0285	-4.20289	5.45851e-05	0.00348329	1.26965	-4.03507	0.00187327
STK25	0.257077	4.42768	4.19729	5.48596e-05	0.00348329	1.49584	4.0339	0.00187327
SCNN1D	0.518101	0.82747	4.19472	5.50652e-05	0.00348329	1.69658	4.03302	0.00187327
RTL10	0.308373	2.37512	4.20027	5.50758e-05	0.00348329	1.6692	4.03297	0.00187327
LINC02593	0.92775	0.608519	4.19711	5.50941e-05	0.00348329	1.70609	4.03289	0.00187327
EIF4EBP3	0.512975	1.48602	4.19433	5.53058e-05	0.00348329	1.68271	4.03199	0.00187327
TARDBP	0.197285	5.70819	4.20006	5.53771e-05	0.00348329	1.40837	4.03169	0.00187327
AL161716.1	-1.40079	3.43566	-4.19178	5.55299e-05	0.00348329	1.55561	-4.03104	0.00187327
C1QTNF6	0.487046	0.736123	4.18867	5.61953e-05	0.00351279	1.665	4.02824	0.00188913
FAM245B	-0.972263	0.571566	-4.19542	5.67117e-05	0.00353281	1.61314	-4.02609	0.0018999
Z94721.1	0.397117	3.89322	4.18108	5.81099e-05	0.00360742	1.47402	4.02036	0.00194002
AC023194.3	-1.07569	3.7458	-4.16937	6.04512e-05	0.00371626	1.56631	-4.01104	0.00199856
CASC2	0.251687	6.46596	4.17333	6.05697e-05	0.00371626	1.26569	4.01058	0.00199856
AL357153.1	-1.11649	1.52783	-4.17003	6.06844e-05	0.00371626	1.61249	-4.01013	0.00199856
RBM15-AS1	-0.418722	3.57334	-4.16834	6.06889e-05	0.00371626	1.50857	-4.01012	0.00199856
KDM3B	-0.207338	6.67584	-4.17608	6.11499e-05	0.0037318	1.27888	-4.00833	0.00200691
EGLN2	0.364979	2.77571	4.1714	6.15272e-05	0.00374214	1.54918	4.00688	0.00201247
TRIM7	0.708107	0.546679	4.1649	6.2014e-05	0.00375905	1.5637	4.00501	0.00202157
NREP-AS1	-1.12998	2.34573	-4.15724	6.32966e-05	0.00382392	1.54834	-4.00017	0.00205645
RFPL3S	0.486794	1.158	4.15579	6.38305e-05	0.00384328	1.55679	3.99818	0.00206686
Z99127.1	-0.437103	2.59211	-4.15354	6.48029e-05	0.00388882	1.53694	-3.9946	0.00209136
SIRT5	0.243901	3.69451	4.1549	6.50897e-05	0.00388901	1.41345	3.99356	0.00209146
TRMT10A	0.296717	3.17579	4.15797	6.5238e-05	0.00388901	1.49529	3.99302	0.00209146
AKT1	0.28395	3.40563	4.15318	6.54849e-05	0.00389084	1.42809	3.99212	0.00209244
AC020913.1	-0.436762	4.90938	-4.15619	6.6213e-05	0.00392116	1.33453	-3.9895	0.00210875
ARMH4	-0.174034	6.03753	-4.14866	6.7165e-05	0.0039645	1.21844	-3.98611	0.00213205
C12orf57	0.442319	4.76108	4.14153	6.95976e-05	0.0040865	1.27991	3.97766	0.00219767
RPS27	0.737372	7.12137	4.14099	6.9686e-05	0.0040865	1.16078	3.97736	0.00219767
RPS6KB2	0.29938	3.82041	4.13293	7.05903e-05	0.0041261	1.32402	3.97429	0.00221896
AP003170.3	-0.454037	1.6868	-4.12984	7.08867e-05	0.00413001	1.46887	-3.97329	0.00222107
NOP53	0.529036	5.22557	4.13268	7.2044e-05	0.0041839	1.23731	3.96943	0.00225004
C20orf187	-0.62838	4.08047	-4.12242	7.30262e-05	0.00420624	1.2899	-3.9662	0.00226206
B3GNT5	-0.473926	5.89795	-4.12882	7.31616e-05	0.00420624	1.16428	-3.96576	0.00226206
MGP	-2.31444	0.123996	-4.12774	7.33528e-05	0.00420624	1.43482	-3.96514	0.00226206
KCNK12	-0.552582	3.02732	-4.12073	7.33633e-05	0.00420624	1.37273	-3.96511	0.00226206
RPS16	0.598275	6.98323	4.12649	7.37974e-05	0.0042177	1.11184	3.9637	0.00226822
AC087741.1	0.393822	2.23661	4.11446	7.47062e-05	0.00425072	1.37295	3.96078	0.00228598
ATP1B2	0.309845	7.187	4.12161	7.48474e-05	0.00425072	1.06116	3.96033	0.00228598
SLC26A6	0.584065	2.28845	4.11121	7.53087e-05	0.00426347	1.37015	3.95886	0.00229284
AC090579.1	-0.552205	9.31386	-4.11934	7.55545e-05	0.00426397	1.0026	-3.95808	0.00229311
AL139147.1	-0.682737	5.95017	-4.10856	7.6062e-05	0.0042792	1.12698	-3.95648	0.0023013
AC007389.1	-1.07166	5.94663	-4.10849	7.68028e-05	0.00430742	1.13741	-3.95416	0.00231647
MOB3B	-0.539857	3.87607	-4.10669	7.75016e-05	0.00433311	1.2446	-3.952	0.00233029
RPS29	0.610464	6.71413	4.11079	7.80897e-05	0.00435247	1.06923	3.95019	0.0023407
NR2F6	0.303839	4.12745	4.10627	7.92136e-05	0.00440149	1.21328	3.94677	0.00236706
AC044840.1	-0.529012	3.20687	-4.09917	8.00374e-05	0.00441036	1.30963	-3.94429	0.00237183
SBF1	0.339242	2.57465	4.09721	8.00932e-05	0.00441036	1.3019	3.94412	0.00237183
RPS9	0.625902	7.05273	4.10409	8.01083e-05	0.00441036	1.02745	3.94408	0.00237183
KANSL1L	-0.284432	6.75561	-4.10017	8.03567e-05	0.00441055	1.01193	-3.94333	0.00237194
RPL13A	0.590275	7.52079	4.09906	8.16509e-05	0.00446797	0.991741	3.9395	0.00240281
LRRC20	0.354308	2.09102	4.08979	8.2005e-05	0.00447375	1.31152	3.93846	0.00240592
ITGA9	-0.72632	1.60808	-4.08895	8.23247e-05	0.00447491	1.33803	-3.93753	0.00240655
AL590432.1	-0.534865	0.365436	-4.09587	8.26123e-05	0.00447491	1.338	-3.93669	0.00240655
GPM6B	-0.375645	8.94971	-4.09344	8.27721e-05	0.00447491	0.898345	-3.93623	0.00240655
LYSMD4	0.243281	3.85766	4.08772	8.31464e-05	0.00448169	1.14581	3.93515	0.00241019
ABLIM3	-0.263387	9.26123	-4.09021	8.44076e-05	0.00453609	0.882307	-3.93153	0.00243945
LRRC45	0.457798	1.25217	4.08422	8.5329e-05	0.00457196	1.31078	3.92892	0.00245874
AC018832.1	-0.535788	4.02072	-4.08965	8.5806e-05	0.00458387	1.16434	-3.92758	0.00246515
SLC16A14	-0.556877	3.25698	-4.08292	8.65086e-05	0.00460774	1.22701	-3.92561	0.00247798
ATAD3B	0.263116	3.89347	4.07867	8.68013e-05	0.00460969	1.13166	3.9248	0.00247903
DNAH11	1.02639	1.78881	4.07031	8.77856e-05	0.00464825	1.24539	3.92209	0.00249977
AC007221.1	-0.908303	5.91545	-4.07181	8.88207e-05	0.00468926	0.973846	-3.91926	0.00252182
CCDC155	-0.475095	3.28527	-4.06695	8.94099e-05	0.00470657	1.16969	-3.91767	0.00253113
FAM120B	0.197987	6.6564	4.06881	8.99826e-05	0.00472291	0.883753	3.91613	0.00253992
KMT5A	0.237729	4.56857	4.06792	9.0681e-05	0.00473413	1.03017	3.91426	0.00254595
LINC02343	-2.20943	4.27933	-4.06172	9.07223e-05	0.00473413	1.05754	-3.91415	0.00254595
AC007389.3	-1.29965	2.52126	-4.05523	9.28686e-05	0.00483212	1.22729	-3.90851	0.00259865
LINC02296	-1.6212	1.65939	-4.0554	9.4643e-05	0.00490203	1.21862	-3.90393	0.00263625
AC019211.1	-1.15798	0.422788	-4.05135	9.50781e-05	0.00490203	1.18762	-3.90282	0.00263625
AL138716.1	-0.64912	1.10319	-4.05022	9.52384e-05	0.00490203	1.20737	-3.90241	0.00263625
LRRC53	-0.713794	-0.00490739	-4.05429	9.55635e-05	0.00490203	1.165	-3.90159	0.00263625
AC109454.3	-0.531784	4.92395	-4.05115	9.55736e-05	0.00490203	0.988157	-3.90156	0.00263625
CAPN15	0.306964	2.83949	4.04715	9.59056e-05	0.00490508	1.09952	3.90072	0.00263789
LINC01195	-0.907487	1.93757	-4.05135	9.6184e-05	0.00490538	1.19923	-3.90002	0.00263805
AL049779.4	-0.395934	4.55175	-4.04724	9.72568e-05	0.00494608	1.00994	-3.89734	0.00265994
RPL41	0.583627	7.7821	4.05043	9.78558e-05	0.00496253	0.809401	3.89585	0.00266878
ABI3BP	-0.845844	5.1871	-4.03991	9.83222e-05	0.00496576	0.961615	-3.8947	0.00267052
CTBP1	0.257863	4.25367	4.04228	9.84711e-05	0.00496576	0.952383	3.89433	0.00267052
NEU3	0.259571	3.40445	4.03972	9.8888e-05	0.00496792	1.03449	3.8933	0.00267168
P2RY11	0.440697	1.97813	4.03799	9.90658e-05	0.00496792	1.12364	3.89287	0.00267168
AF127577.2	-0.479886	3.62346	-4.04032	0.000100659	0.00503378	1.06501	-3.889	0.0027071
AC006348.1	-0.825749	-0.117124	-4.03284	0.000101527	0.00506311	1.07288	-3.88691	0.00272287
CACTIN	0.358298	1.8762	4.02824	0.000103407	0.00513342	1.12283	3.88246	0.00276069
BLM	0.470159	5.22908	4.02708	0.000103641	0.00513342	0.820499	3.88191	0.00276069
AC068286.2	-0.635721	2.06623	-4.02965	0.000103792	0.00513342	1.1157	-3.88155	0.00276069
PSKH2	-0.969008	4.0759	-4.02414	0.000104251	0.00514202	0.961509	-3.88048	0.00276531
SLC25A37	0.256017	5.94711	4.03096	0.000104877	0.00515876	0.809088	3.87902	0.00277431
TACR1	-0.602995	7.21831	-4.02859	0.000105963	0.00519794	0.760942	-3.87652	0.00279538
AC104237.1	-0.855602	0.071431	-4.02194	0.000106471	0.0052087	1.10461	-3.87535	0.00280117
RPS21	0.65527	5.53655	4.02604	0.000106891	0.00521215	0.84169	3.87439	0.00280303
AC022762.2	0.401032	0.909325	4.01917	0.000107121	0.00521215	1.09724	3.87387	0.00280303
RPS19	0.584565	6.7846	4.02089	0.000109173	0.00529169	0.749145	3.86925	0.0028458
PLCL2	-1.01838	2.86906	-4.01141	0.000109343	0.00529169	0.986581	-3.86886	0.0028458
LRRN3	-0.45084	3.63542	-4.01898	0.000110014	0.00530985	0.961888	-3.86737	0.00285557
INTS3	0.245636	4.70039	4.00496	0.000111924	0.00537533	0.789361	3.86317	0.00289078
GRM4	0.925309	0.0509591	4.0059	0.000111967	0.00537533	1.03022	3.86308	0.00289078
FAM66C	0.32975	3.53326	4.00504	0.000112424	0.00537773	0.908163	3.86208	0.00289207
CLUL1	-0.354415	8.228	-4.00296	0.000112757	0.00537773	0.620797	-3.86136	0.00289207
BMPER	-0.863869	3.622	-4.00436	0.000113052	0.00537773	0.927443	-3.86072	0.00289207
PALLD	-0.500218	3.60772	-4.01055	0.000113212	0.00537773	0.948812	-3.86038	0.00289207
HSCB	0.24969	3.79048	3.99983	0.000114162	0.00539364	0.866433	3.85834	0.00290063
AC016931.1	-0.639034	0.388272	-3.99907	0.000114422	0.00539364	1.02352	-3.85778	0.00290063
AL354696.2	-0.286846	3.89	-3.99893	0.000114446	0.00539364	0.885745	-3.85773	0.00290063
CLEC19A	-1.09434	0.176993	-3.99708	0.000115233	0.00541656	1.02159	-3.85605	0.00291295
ST3GAL3	-0.327233	9.64139	-4.00062	0.000116965	0.00548365	0.564245	-3.8524	0.00294904
KPNA3	-0.193054	8.38138	-3.99614	0.000118197	0.00552702	0.57373	-3.84984	0.00297236
MIR181A2HG	-0.246599	6.69087	-3.99543	0.000118656	0.00553409	0.647735	-3.84889	0.00297616
AC009690.2	-0.277588	7.80357	-3.99471	0.000119045	0.0055379	0.593967	-3.84808	0.00297821
AC091045.1	-0.575465	3.95902	-3.9882	0.000119704	0.00555423	0.86766	-3.84673	0.00298699
AC117386.2	-0.937979	0.0988068	-3.98892	0.000120284	0.00555691	0.930412	-3.84555	0.00298843
CEL	0.377366	0.781175	3.98862	0.00012038	0.00555691	1.01405	3.84535	0.00298843
BCO2	-0.244301	8.87705	-3.98446	0.000121007	0.00557157	0.521489	-3.84408	0.00299631
OSBPL11	-0.163403	5.3671	-3.98646	0.000123237	0.00564546	0.691232	-3.8396	0.00303605
LINC00276	-0.780997	1.66114	-3.97887	0.000123239	0.00564546	0.981202	-3.83959	0.00303605
LINC02208	-0.660765	-0.423071	-3.977	0.000125293	0.00572499	0.900045	-3.83553	0.00307882
AC137810.1	-0.560125	4.37972	-3.98245	0.000125634	0.00572604	0.776412	-3.83486	0.00307939
ETV4	-0.643913	2.56009	-3.97103	0.000126843	0.00575588	0.950103	-3.83251	0.00309543
CENPX	0.443214	3.91743	3.97702	0.000126928	0.00575588	0.784267	3.83234	0.00309543
C8orf37-AS1	-0.440433	2.5586	-3.97819	0.000127762	0.00577914	0.916331	-3.83073	0.00310795
PTP4A3	0.447953	7.47235	3.97199	0.000128559	0.00580063	0.515354	3.8292	0.0031195
U2SURP	0.19836	7.5738	3.96923	0.000129039	0.00580772	0.499506	3.82829	0.00312332
PLXNB1	0.34634	2.32882	3.96503	0.000130887	0.00584248	0.849484	3.82478	0.00314201
AC106791.1	0.246465	4.78766	3.96329	0.000130938	0.00584248	0.651947	3.82469	0.00314201
ERF	0.382587	3.1069	3.96626	0.000131455	0.00584248	0.827871	3.82372	0.00314201
MYT1L	1.62074	1.97815	3.96195	0.000132059	0.00584248	0.878532	3.82259	0.00314201
AC012313.8	0.487958	1.31241	3.96503	0.000132258	0.00584248	0.917161	3.82222	0.00314201
ZNF580	0.370065	3.3646	3.96546	0.000132319	0.00584248	0.794094	3.8221	0.00314201
CZIB	0.376192	3.81819	3.9618	0.000132335	0.00584248	0.723077	3.82207	0.00314201
TCTEX1D2	0.228092	5.63655	3.95934	0.000132407	0.00584248	0.576029	3.82194	0.00314201
EPRS	0.211933	5.84723	3.95702	0.000133691	0.00587117	0.544135	3.81956	0.00315744
AF130417.1	-0.811389	1.56059	-3.9645	0.00013371	0.00587117	0.911176	-3.81952	0.00315744
ESR2	-0.440752	7.96964	-3.96418	0.000134591	0.00587431	0.499546	-3.8179	0.00315912
MAPK11	0.388513	3.14493	3.95564	0.000134645	0.00587431	0.767857	3.8178	0.00315912
NEMP2	-0.444616	1.47506	-3.95596	0.00013476	0.00587431	0.898555	-3.81759	0.00315912
FBXW12	-0.61638	0.539101	-3.9539	0.000135166	0.00587778	0.890263	-3.81685	0.00316099
ARMCX4	-0.301099	5.5991	-3.95733	0.000138136	0.00598535	0.586438	-3.81148	0.00321884
PLXNA1	0.484283	0.702295	3.94725	0.000138413	0.00598535	0.874514	3.81099	0.00321884
AC105001.1	-0.565047	3.23628	-3.95415	0.000138638	0.00598535	0.783107	-3.81059	0.00321884
RPL37A	0.644218	7.12804	3.95377	0.000139335	0.00600108	0.509881	3.80935	0.0032273
CCDC192	-0.741236	1.96153	-3.9421	0.000141272	0.00606808	0.851685	-3.80593	0.00326333
DNAJC18	-0.257379	4.5478	-3.94329	0.000141565	0.00606808	0.624416	-3.80542	0.00326333
AC007277.1	-0.458217	4.82891	-3.94568	0.000141958	0.00606933	0.616948	-3.80473	0.00326401
ORC1	-0.461975	0.535249	-3.94165	0.000142561	0.00606933	0.839445	-3.80368	0.00326401
TMEM129	0.311503	3.37619	3.94339	0.000142895	0.00606933	0.719335	3.8031	0.00326401
USF2	0.272778	4.46891	3.94393	0.000143287	0.00606933	0.623404	3.80243	0.00326401
CERK	0.206756	3.66745	3.93735	0.000143577	0.00606933	0.660663	3.80192	0.00326401
SNTG2	-0.735822	6.00505	-3.94471	0.000144025	0.00606933	0.555311	-3.80115	0.00326401
MYO1H	-0.655561	1.61186	-3.93619	0.000144124	0.00606933	0.841411	-3.80098	0.00326401
SH3KBP1	-0.62087	2.38255	-3.93868	0.000144291	0.00606933	0.792796	-3.80069	0.00326401
DVL1	0.394801	3.1559	3.93481	0.000144858	0.00607897	0.69896	3.79972	0.00326919
TP53I13	0.411173	1.84726	3.93651	0.000146597	0.00613421	0.810441	3.79676	0.0032989
HEXA	-0.326493	7.05396	-3.94045	0.000146856	0.00613421	0.450702	-3.79633	0.0032989
AL162394.1	-0.763231	-0.49752	-3.92947	0.000151414	0.00630996	0.725743	-3.78874	0.00339341
A1CF	-0.71575	1.26196	-3.92021	0.000152784	0.00634839	0.801027	-3.7865	0.00341408
C7orf50	0.165833	5.94375	3.92486	0.000153162	0.00634839	0.443419	3.78589	0.00341408
LINC02067	-0.69552	-0.0599053	-3.92052	0.000153394	0.00634839	0.74421	-3.78551	0.00341408
AC097467.3	-0.504317	2.57418	-3.92528	0.000155159	0.00640671	0.699684	-3.78266	0.00344544
HAGHL	0.687073	1.32403	3.91513	0.000155986	0.00641086	0.756356	3.78134	0.00344768
PLEKHH3	0.35707	3.01805	3.91528	0.000156107	0.00641086	0.648985	3.78115	0.00344768
RPARP-AS1	0.349572	3.65154	3.91962	0.000156328	0.00641086	0.617341	3.7808	0.00344768
TSPAN17	0.28631	4.09486	3.91431	0.000156725	0.00641182	0.542554	3.78016	0.00344819
CSTF2	-0.242341	3.20698	-3.91903	0.000157394	0.00641182	0.66238	-3.7791	0.00344819
HAR1B	0.769746	-0.157173	3.91104	0.000157976	0.00641182	0.749721	3.77818	0.00344819
AC018616.1	-0.519921	6.74727	-3.91295	0.000157989	0.00641182	0.379894	-3.77816	0.00344819
TET3	-0.302394	5.97199	-3.91216	0.000158132	0.00641182	0.393823	-3.77794	0.00344819
AC007218.3	-1.08622	0.660703	-3.91127	0.000158729	0.00642159	0.757274	-3.777	0.00345344
WDR63	-0.657553	2.88638	-3.90696	0.000160335	0.00647199	0.658221	-3.77449	0.00348055
LINC00992	0.4363	2.42094	3.90759	0.000160757	0.00647451	0.664653	3.77384	0.00348191
SNHG10	0.343938	4.02144	3.91112	0.000161933	0.00650733	0.547308	3.77202	0.00349956
NFE2L3	-0.581199	2.8405	-3.90345	0.000163773	0.00656473	0.68321	-3.7692	0.00353042
AGBL2	-0.569617	-0.297427	-3.90066	0.000164091	0.00656473	0.685501	-3.76871	0.00353042
AC017083.1	0.417464	2.35692	3.90135	0.000165575	0.00656581	0.664796	3.76647	0.003531
SCRIB	0.341218	3.09202	3.89783	0.00016575	0.00656581	0.570381	3.7662	0.003531
CDC42SE1	0.261225	4.31573	3.8984	0.000166382	0.00656581	0.479786	3.76525	0.003531
ADAM21	-0.568173	1.11141	-3.90438	0.00016656	0.00656581	0.726114	-3.76498	0.003531
PCID2	0.187563	5.08317	3.89598	0.000166862	0.00656581	0.388878	3.76453	0.003531
CTNND1	-0.207367	6.39086	-3.90431	0.000167002	0.00656581	0.352263	-3.76432	0.003531
RPL21	0.521653	7.67659	3.90402	0.00016701	0.00656581	0.310886	3.76431	0.003531
RPL3	0.589762	7.92861	3.904	0.000167035	0.00656581	0.313126	3.76427	0.003531
HACD4	-0.740964	0.246575	-3.8948	0.000167702	0.00657763	0.692997	-3.76328	0.00353736
ZNF841	0.365134	2.3804	3.89017	0.000171086	0.0066958	0.588248	3.75828	0.00360091
RPS28	0.599484	7.15216	3.8915	0.000174535	0.00680534	0.289814	3.75328	0.00365982
AP001062.1	0.443684	1.27479	3.88451	0.000174641	0.00680534	0.657677	3.75313	0.00365982
CSGALNACT1	-0.760693	0.471735	-3.88618	0.000176506	0.0068514	0.65849	-3.75047	0.00368459
ALG1	0.288315	3.5198	3.88113	0.000176585	0.0068514	0.481419	3.75035	0.00368459
FAM200B	0.53593	3.65744	3.87896	0.000180372	0.00698331	0.471263	3.74503	0.00375553
PACRG-AS3	-0.467665	3.15956	-3.87616	0.000182504	0.00705067	0.549313	-3.74208	0.00379176
ASIC2	1.56258	3.44275	3.86867	0.000185088	0.0071352	0.434654	3.73855	0.00383721
CUL9	0.213254	3.92588	3.86599	0.000187393	0.00720761	0.386817	3.73543	0.00387616
TARBP2	0.389725	2.85708	3.86525	0.000188278	0.00720761	0.497199	3.73425	0.00387616
NBPF9	0.291007	4.69901	3.86277	0.000188426	0.00720761	0.294321	3.73405	0.00387616
AC073648.7	-0.736546	2.37422	-3.86226	0.000188593	0.00720761	0.547219	-3.73383	0.00387616
PHC3	-0.269049	8.15338	-3.86947	0.000188968	0.00720761	0.155764	-3.73333	0.00387616
ADAMTS16	-0.634896	1.8471	-3.86208	0.000190074	0.00723063	0.597127	-3.73186	0.00388854
AC011478.1	-0.79705	0.0243082	-3.86145	0.000190375	0.00723063	0.553452	-3.73146	0.00388854
DGCR6	1.07665	-0.576713	3.86055	0.000190861	0.00723385	0.470776	3.73081	0.00389027
AP003071.2	-0.868744	2.08219	-3.85798	0.000191469	0.00724164	0.589641	-3.73001	0.00389446
PZP	-0.446597	3.68729	-3.86153	0.000195074	0.00736251	0.435219	-3.72531	0.00395946
DAAM2	-0.640495	-0.491682	-3.85515	0.000196653	0.00740657	0.49785	-3.72328	0.00398316
LINC01266	0.313571	5.73489	3.84876	0.000198153	0.00743631	0.183291	3.72136	0.00399915
RPL4	0.481169	5.58253	3.85617	0.000198269	0.00743631	0.261775	3.72121	0.00399915
TTC21B-AS1	-0.480056	3.35196	-3.84956	0.000202161	0.00756655	0.382363	-3.7163	0.00406919
VPS26B	0.183736	5.00133	3.84029	0.000204063	0.00761164	0.212645	3.71393	0.00409344
TMUB1	0.33327	2.99084	3.84496	0.000204212	0.00761164	0.420431	3.71375	0.00409344
CPTP	0.473032	1.10558	3.84502	0.000205527	0.00764486	0.537236	3.71212	0.0041113
STAM-AS1	0.438477	2.28001	3.83856	0.000207349	0.00769672	0.459581	3.70989	0.0041392
EFCAB2	-0.60687	6.33304	-3.83419	0.000208914	0.00773252	0.175399	-3.70799	0.00415845
LPGAT1	-0.210484	7.64186	-3.83611	0.000209173	0.00773252	0.0530271	-3.70767	0.00415845
FLACC1	-0.954485	2.54751	-3.83568	0.00020963	0.00773354	0.447657	-3.70712	0.004159
SLC4A7	-0.251283	9.86805	-3.83385	0.000211558	0.00777327	-0.0149133	-3.7048	0.00418036
RNF169	-0.283574	6.06463	-3.83619	0.000211842	0.00777327	0.141899	-3.70446	0.00418036
SAP25	0.360609	4.63177	3.83123	0.000212863	0.00777327	0.225691	3.70324	0.00418036
CLASP2	-0.193219	9.84417	-3.83319	0.000212933	0.00777327	-0.015404	-3.70316	0.00418036
FGF7	-0.491514	1.62762	-3.83659	0.000213051	0.00777327	0.495898	-3.70302	0.00418036
UTS2	-0.487809	1.07176	-3.82853	0.000213297	0.00777327	0.498429	-3.70272	0.00418036
FAM229A	0.3903	1.67778	3.82901	0.000215058	0.00782158	0.459024	3.70064	0.00420634
ATP1A1	-0.230671	6.97456	-3.82929	0.000216568	0.00786062	0.0794353	-3.69886	0.00422734
SEPTIN4-AS1	-0.440059	3.14543	-3.82338	0.000219094	0.00790902	0.345768	-3.69592	0.00425337
ZNF850	-0.335486	2.43101	-3.82081	0.000219515	0.00790902	0.405847	-3.69543	0.00425337
AC023644.1	-0.53238	4.07328	-3.8231	0.000220107	0.00790902	0.240394	-3.69475	0.00425337
BRSK2	0.274252	4.42709	3.81891	0.000220406	0.00790902	0.196412	3.6944	0.00425337
AC087521.2	-0.656261	3.19649	-3.81876	0.000220463	0.00790902	0.340252	-3.69434	0.00425337
TEX22	0.350089	3.33129	3.82233	0.00022089	0.00790902	0.312548	3.69384	0.00425337
SNHG25	0.776628	4.58988	3.81811	0.000220986	0.00790902	0.165203	3.69373	0.00425337
NPAS2	1.47937	-0.579729	3.81799	0.000221416	0.00790902	0.405122	3.69324	0.00425337
CHRM5	-0.523599	3.76338	-3.82336	0.000222903	0.0079464	0.296329	-3.69154	0.00427347
AP002433.1	-0.466765	2.57301	-3.81531	0.000224245	0.00797842	0.388431	-3.69001	0.00429069
UBE2V1	0.201498	5.31747	3.81587	0.000225544	0.00800883	0.112294	3.68854	0.00430704
AL512603.2	-0.778991	0.787973	-3.80915	0.000230575	0.00817132	0.423934	-3.68292	0.00439443
LRRN1	-0.507399	2.94992	-3.80705	0.000235498	0.0083294	0.346862	-3.67754	0.00447944
AC015802.3	0.724629	3.16124	3.79709	0.000239742	0.00846289	0.222323	3.67298	0.00455123
GLUD1	-0.203603	7.77946	-3.80005	0.000240314	0.00846527	-0.0629328	-3.67237	0.00455251
DLG4	0.203119	7.26049	3.79795	0.00024075	0.00846527	-0.0689404	3.6719	0.00455251
ZNF263	0.229524	3.57667	3.79845	0.000242434	0.00850786	0.20264	3.67012	0.00457541
AC003005.2	0.97724	-0.374407	3.78926	0.00024498	0.00858051	0.368898	3.66745	0.00461448
TBX6	0.362299	1.43305	3.78866	0.000245588	0.00858511	0.362194	3.66682	0.00461696
ART4	-0.613347	3.97286	-3.79722	0.0002487	0.00867704	0.215976	-3.66359	0.0046664
CPT1B	0.360957	3.75049	3.78388	0.000249722	0.00869582	0.139387	3.66255	0.0046765
MAGI1-AS1	-0.488954	2.79283	-3.78742	0.000252361	0.00875376	0.241079	-3.65985	0.00470765
HMGA1	0.405652	3.91134	3.78454	0.000252819	0.00875376	0.146815	3.65939	0.00470765
PWWP2B	0.315506	2.60355	3.78246	0.000252844	0.00875376	0.253343	3.65936	0.00470765
GRM3	-0.67785	1.38063	-3.78391	0.00025347	0.0087585	0.344115	-3.65873	0.0047102
AL162718.1	-0.63663	0.690391	-3.78307	0.000254652	0.0087585	0.349852	-3.65754	0.0047102
TCF7L2	-0.714832	3.50563	-3.77824	0.000254897	0.0087585	0.137395	-3.65729	0.0047102
SYNE3	-0.291329	6.17042	-3.78288	0.000254927	0.0087585	-0.0481526	-3.65726	0.0047102
SEMA6C	0.277503	3.00446	3.7835	0.00025592	0.00877586	0.210818	3.65626	0.00471954
AC019185.2	-0.629091	1.00122	-3.77996	0.000256723	0.00878665	0.337282	-3.65546	0.00472535
LHFPL3-AS2	-0.399157	6.21659	-3.77728	0.000258128	0.00881799	-0.038897	-3.65406	0.0047422
WAS	0.550245	-0.192242	3.77278	0.000259783	0.00884314	0.322705	3.65242	0.00475572
DNAJC1	-0.220262	8.63438	-3.77505	0.000259847	0.00884314	-0.183544	-3.65235	0.00475572
GRIPAP1	-0.249495	6.81241	-3.776	0.00026242	0.00891195	-0.0979574	-3.64982	0.00479273
EIF1B-AS1	0.182827	7.251	3.7747	0.000262859	0.00891195	-0.136209	3.6494	0.00479273
NAA10	0.40055	3.39198	3.77346	0.0002639	0.00893045	0.156644	3.64838	0.00480268
FAM66A	0.992889	0.756115	3.76765	0.000264646	0.00893889	0.297924	3.64765	0.00480721
SERPINE3	-0.697541	2.86315	-3.77222	0.000266901	0.00899816	0.265206	-3.64547	0.00483909
RPL18A	0.733788	6.77869	3.77136	0.000268106	0.00902188	-0.0764143	3.64431	0.00485185
WNT5B	-0.405815	4.13324	-3.75938	0.000272898	0.00916165	0.0693398	-3.63975	0.00492702
UNC79	-0.627392	5.22047	-3.75823	0.000273548	0.00916165	-0.0727432	-3.63914	0.00492702
AC139887.2	0.304221	6.05341	3.75973	0.000273786	0.00916165	-0.135954	3.63892	0.00492702
DNASE1L2	0.549472	0.180833	3.75677	0.000274964	0.00918399	0.28369	3.63781	0.00493903
Z97832.2	0.35472	1.69443	3.75615	0.000276086	0.00919984	0.219007	3.63676	0.00494755
AHNAK2	-1.08843	1.49299	-3.7587	0.00027646	0.00919984	0.24059	-3.63641	0.00494755
AC018946.1	-0.525879	0.604253	-3.75815	0.000278643	0.00925536	0.268937	-3.63439	0.00497741
UBE2I	0.180123	5.0436	3.7529	0.000281048	0.00931807	-0.0777352	3.63217	0.00501114
C3	0.830188	1.41544	3.74968	0.000282846	0.00934172	0.227453	3.63052	0.00502385
AC022182.1	-0.773975	0.882947	-3.74959	0.000283867	0.00934172	0.246942	-3.62959	0.00502385
AFAP1L2	-1.17347	0.62018	-3.74785	0.000284202	0.00934172	0.232991	-3.62929	0.00502385
NRTN	0.392318	4.66865	3.75132	0.000285308	0.00934172	-0.043689	3.62829	0.00502385
AL355334.2	0.532086	0.326635	3.74617	0.000285481	0.00934172	0.251776	3.62813	0.00502385
CALML4	-0.303097	3.01752	-3.74627	0.000285918	0.00934172	0.110277	-3.62774	0.00502385
TYR	-0.77865	1.87673	-3.75062	0.000286533	0.00934172	0.225845	-3.62718	0.00502385
IGDCC3	0.458446	2.40037	3.74601	0.000287218	0.00934172	0.146948	3.62656	0.00502385
INTS1	0.306247	4.42328	3.74439	0.000287285	0.00934172	-0.0628958	3.6265	0.00502385
NXF5	-0.778512	0.563094	-3.74446	0.000287682	0.00934172	0.233045	-3.62615	0.00502385
RMC1	-0.206864	6.05672	-3.74756	0.000288132	0.00934172	-0.141616	-3.62574	0.00502385
MXD4	0.222523	5.31471	3.74842	0.000288281	0.00934172	-0.0946958	3.62561	0.00502385
Z98884.1	-0.453699	4.33543	-3.7473	0.000288507	0.00934172	0.00486915	-3.62541	0.00502385
DRG1	-0.181755	6.11465	-3.74598	0.000289432	0.00934197	-0.158379	-3.62458	0.00502399
AL627171.2	0.653595	2.53194	3.74851	0.000289553	0.00934197	0.170818	3.62447	0.00502399
TMEM14B	-0.427459	9.33289	-3.74339	0.00029383	0.00946302	-0.296796	-3.62068	0.00508909
FKBP2	0.667965	1.42223	3.73711	0.000298069	0.00958239	0.19604	3.61697	0.00515328
CARMIL3	0.447421	1.12619	3.73258	0.000299593	0.0096142	0.174437	3.61565	0.00517039
UPK1B	-0.679707	0.0247568	-3.72788	0.000304896	0.00976699	0.170556	-3.6111	0.00525256
AC008474.1	-0.537675	1.38169	-3.73345	0.000305671	0.00976705	0.175561	-3.61045	0.00525259
CCDC81	0.396268	1.71946	3.72762	0.000306217	0.00976705	0.123017	3.60998	0.00525259
WASHC1	0.470425	4.70397	3.72603	0.000306526	0.00976705	-0.144317	3.60972	0.00525259
RPL38	0.629248	5.94049	3.73187	0.000307509	0.00977511	-0.170724	3.60889	0.00525692
C19orf81	0.455858	3.4653	3.72992	0.000307922	0.00977511	0.0189549	3.60854	0.00525692
SLC3A1	-0.382453	5.02116	-3.72811	0.000308408	0.00977511	-0.126812	-3.60813	0.00525692
AL451123.1	-0.531324	1.08951	-3.72398	0.000309531	0.00977849	0.164839	-3.60719	0.00525874
TRIM14	-0.632397	1.68965	-3.73005	0.0003096	0.00977849	0.168751	-3.60713	0.00525874
TOMM40L	0.309585	2.2746	3.72703	0.000311446	0.00981954	0.106461	3.60559	0.00528082
LINC01619	-0.937188	3.07989	-3.72217	0.000312897	0.00984804	0.102747	-3.60438	0.00529614
HM13	0.183276	5.35589	3.72129	0.000315658	0.00990296	-0.195033	3.6021	0.00532568
AC109322.1	0.595178	0.595352	3.71898	0.000315742	0.00990296	0.150748	3.60203	0.00532568
YAF2	-0.174683	7.82755	-3.71682	0.000321378	0.0100622	-0.351941	-3.59743	0.00541133
AC079949.2	0.491292	0.56663	3.7158	0.000323213	0.010089	0.141988	3.59595	0.00542574
AC004477.1	0.466934	1.5142	3.71595	0.000323355	0.010089	0.121726	3.59583	0.00542574
AC061975.8	-0.469879	3.60168	-3.70863	0.000325884	0.0101503	-0.0790028	-3.5938	0.00545872
FGF2	-0.800021	2.03913	-3.71165	0.000326615	0.0101555	0.0971653	-3.59322	0.00546152
SEC16A	0.169593	4.3875	3.70703	0.000328407	0.0101928	-0.171198	3.5918	0.00548153
AC106795.3	-0.548464	1.89807	-3.70598	0.000328945	0.0101928	0.0694308	-3.59137	0.00548153
RPS10	0.561093	5.14195	3.71179	0.000330341	0.0102184	-0.180755	3.59027	0.00549534
EDDM13	-0.469686	4.55181	-3.71022	0.000333094	0.0102859	-0.122201	-3.5881	0.00553163
NECTIN1-AS1	-0.439658	3.32018	-3.70692	0.000333673	0.0102862	-0.041829	-3.58765	0.00553176
C21orf91-OT1	-0.837893	1.46992	-3.70689	0.000335913	0.0103362	0.0901578	-3.5859	0.00555866
ZNF442	0.561585	1.62115	3.69969	0.000336899	0.0103362	0.077927	3.58514	0.00555866
AC025178.1	-0.302542	2.38229	-3.69915	0.000337018	0.0103362	0.00999681	-3.58505	0.00555866
RPL18	0.537529	6.5943	3.70333	0.000340316	0.0104196	-0.304848	3.5825	0.00560351
C2CD6	-0.494048	5.96331	-3.69737	0.000341044	0.0104241	-0.307967	-3.58195	0.00560595
SLC2A4RG	0.529618	2.97468	3.69258	0.000345221	0.0105187	-0.0616292	3.57877	0.00565682
SLC27A3	0.559286	-0.0385974	3.69171	0.000345845	0.0105187	0.0689957	3.57829	0.00565682
TET1	-0.312711	5.56351	-3.69287	0.000345891	0.0105187	-0.30881	-3.57826	0.00565682
ZNF451-AS1	-0.29301	6.18467	-3.69654	0.00034658	0.0105219	-0.311696	-3.57774	0.00565854
AC023480.1	-0.443548	4.61177	-3.69788	0.000347223	0.0105237	-0.188258	-3.57725	0.00565949
NEIL2	0.337869	2.94481	3.69345	0.000348235	0.0105366	-0.0395456	3.57649	0.00566644
FES	0.369411	1.64501	3.6881	0.000351232	0.0106094	0.00417172	3.57425	0.00570561
SLC27A2	0.443648	3.16949	3.68639	0.000352323	0.0106234	-0.125853	3.57344	0.00571314
RPS5	0.606367	6.38904	3.69301	0.000352875	0.0106234	-0.3173	3.57303	0.00571314
AL355073.1	-0.928216	0.679361	-3.68768	0.000355987	0.0106992	0.0595313	-3.57073	0.00575391
C17orf113	0.45157	0.976873	3.68755	0.000357493	0.0107187	0.0504187	3.56962	0.00576438
ST6GALNAC6	0.405255	1.83472	3.68378	0.000358147	0.0107187	0.00890911	3.56915	0.00576438
TMEM108-AS1	-0.557893	3.49183	-3.68879	0.000358422	0.0107187	-0.148735	-3.56895	0.00576438
DDX56	0.24883	3.60837	3.68303	0.000363211	0.0108439	-0.158235	3.56547	0.00583172
ITPK1-AS1	-0.486697	1.8293	-3.67883	0.000365337	0.0108893	-0.0127894	-3.56393	0.00585615
GLRA1	-0.386487	3.37538	-3.67963	0.00036968	0.0110006	-0.131158	-3.56083	0.00591596
SGTA	0.243914	5.21999	3.67499	0.000373	0.011081	-0.331542	3.55849	0.00595924
RGS6	-0.655877	1.20605	-3.67116	0.000374044	0.0110938	0.00300088	-3.55775	0.00596608
AL031772.1	-0.413052	1.7215	-3.6704	0.000374934	0.0111019	-0.0204158	-3.55713	0.00597043
PPP1R3F	0.288279	3.844	3.6726	0.000375766	0.0111082	-0.213053	3.55654	0.00597386
AC092574.2	-0.477591	4.18237	-3.66664	0.000377526	0.011142	-0.247117	-3.55532	0.005992
ZNF518A	0.192814	6.44671	3.66728	0.000378326	0.0111473	-0.456183	3.55476	0.00599487
CADM2-AS1	-0.395795	5.6044	-3.67126	0.000381188	0.0112133	-0.377855	-3.55278	0.00603036
AC087623.2	0.573565	-0.144915	3.66272	0.000382936	0.0112463	-0.0294318	3.55157	0.00604812
DENND2C	-0.305446	4.17826	-3.66758	0.000384868	0.0112846	-0.267553	-3.55025	0.00606873
CPEB1-AS1	-0.429379	5.09968	-3.66638	0.000386967	0.0113015	-0.337434	-3.54882	0.0060778
DCXR	0.538669	3.37305	3.66576	0.000387239	0.0113015	-0.176992	3.54863	0.0060778
PIK3C2G	-1.00853	0.506375	-3.66221	0.000387326	0.0113015	-0.0385901	-3.54857	0.0060778
APCDD1L	-0.62057	2.03273	-3.66041	0.000388118	0.0113063	-0.0565923	-3.54803	0.00608037
AL135978.2	-0.328422	4.40837	-3.65645	0.000394092	0.0114618	-0.297644	-3.54401	0.00616398
ABHD17A	0.396746	3.62382	3.65572	0.000394855	0.0114655	-0.239999	3.5435	0.00616597
CCDC154	0.297907	3.0472	3.65483	0.000396239	0.0114871	-0.179624	3.54258	0.00617762
UBE2J2	0.177638	4.90903	3.65622	0.000397069	0.0114927	-0.37408	3.54202	0.0061806
AL158071.1	-0.548158	4.40222	-3.65766	0.000397835	0.0114963	-0.319701	-3.54152	0.00618258
AC008525.1	-0.8178	0.650683	-3.6524	0.000400626	0.0115373	-0.0507401	-3.53967	0.00620459
RBMX2	0.349693	3.01601	3.65101	0.000401415	0.0115373	-0.199542	3.53915	0.00620459
EEF1A1	0.507989	8.35706	3.65513	0.000402445	0.0115373	-0.534148	3.53848	0.00620459
AC009065.1	0.496829	0.272399	3.65442	0.000402521	0.0115373	-0.0468907	3.53843	0.00620459
C1QTNF4	0.56701	2.85187	3.65302	0.000403046	0.0115373	-0.174058	3.53808	0.00620459
AL133334.1	-0.378683	3.51013	-3.65626	0.000403564	0.0115373	-0.244172	-3.53774	0.00620459
AL139423.1	-0.397642	6.02936	-3.65265	0.000403926	0.0115373	-0.436008	-3.53751	0.00620459
AC023389.1	-0.395743	4.86981	-3.65255	0.000404378	0.0115373	-0.342428	-3.53721	0.00620459
C2orf73	0.523032	2.48539	3.64637	0.000406259	0.0115376	-0.193398	3.53598	0.00620476
AL022328.2	0.44301	0.3346	3.64653	0.00040639	0.0115376	-0.0687879	3.5359	0.00620476
CA11	0.353119	4.09116	3.64801	0.000407311	0.0115376	-0.308305	3.5353	0.00620476
AC079760.1	-0.791181	0.717551	-3.64767	0.000407873	0.0115376	-0.0651636	-3.53494	0.00620476
BAIAP2	0.213015	4.26277	3.64759	0.000408098	0.0115376	-0.341512	3.53479	0.00620476
AC005592.1	-0.331213	1.695	-3.64496	0.000408413	0.0115376	-0.113717	-3.53459	0.00620476
ZFAND5	0.227354	5.21614	3.64925	0.000408875	0.0115376	-0.429452	3.53429	0.00620476
STS	-0.479904	3.29654	-3.64467	0.000413095	0.0116384	-0.242349	-3.53157	0.00625899
GAK	0.221457	4.97891	3.64101	0.000415167	0.0116785	-0.440837	3.53025	0.00628056
TMEFF1	0.389076	2.34167	3.6391	0.000416088	0.0116862	-0.214509	3.52966	0.00628466
IP6K2	-0.139611	6.48469	-3.64096	0.000417084	0.0116959	-0.528585	-3.52903	0.0062899
TLE5	0.282705	5.22714	3.64199	0.000418212	0.0117012	-0.428714	3.52832	0.00629275
SMCO4	0.475454	1.24452	3.63747	0.000418679	0.0117012	-0.127494	3.52802	0.00629275
SLC25A25-AS1	0.274104	3.71995	3.6367	0.000419223	0.0117012	-0.343727	3.52768	0.00629275
RPL36A	0.470514	5.10973	3.64145	0.000421333	0.0117413	-0.412068	3.52635	0.00631429
AC010319.5	0.463325	3.27858	3.63829	0.000421963	0.0117413	-0.291982	3.52595	0.00631429
AC011625.1	-0.717809	3.64295	-3.63672	0.000423015	0.0117524	-0.222588	-3.52529	0.00632027
LINC02259	-0.47368	1.2527	-3.63855	0.000425253	0.0117846	-0.100484	-3.52389	0.00633762
STK31	-0.609256	2.3138	-3.6322	0.000425486	0.0117846	-0.178371	-3.52375	0.00633762
DAW1	-0.967827	-0.890905	-3.63125	0.000426886	0.0118053	-0.186555	-3.52288	0.00634872
MAP3K11	0.215917	4.31923	3.63477	0.000427857	0.011814	-0.37322	3.52228	0.0063534
AL513534.2	-0.410038	1.30291	-3.62829	0.000432045	0.0119058	-0.137821	-3.51969	0.00640277
C2orf74	0.28998	4.48117	3.6289	0.000432505	0.0119058	-0.421332	3.51941	0.00640277
PRKN	-0.229964	8.31714	-3.62771	0.000440224	0.0120819	-0.650384	-3.51472	0.00649748
NUTM2A-AS1	-0.237271	6.91004	-3.62257	0.000440486	0.0120819	-0.61194	-3.51456	0.00649748
RPS15	0.547116	7.10124	3.62872	0.000440916	0.0120819	-0.563307	3.5143	0.00649748
MBOAT1	0.549638	0.676321	3.61904	0.000445308	0.0121837	-0.141499	3.51167	0.00655224
CYP3A4	-0.719794	-0.485512	-3.62098	0.000446487	0.0121974	-0.1877	-3.51096	0.00655962
PRCD	0.432578	8.27783	3.61903	0.000448002	0.0122203	-0.692887	3.51006	0.00657189
ADRA1A	-0.93253	-0.0996556	-3.61498	0.000451607	0.0123	-0.159583	-3.50793	0.00661476
JPX	-0.129832	8.18341	-3.61983	0.000454966	0.0123557	-0.680183	-3.50596	0.00664472
SPTSSB	-0.850284	0.607022	-3.61525	0.000455025	0.0123557	-0.167652	-3.50592	0.00664472
PDAP1	0.280107	5.28694	3.61644	0.000457531	0.012405	-0.523091	3.50446	0.00667125
PELI3	0.298883	2.16204	3.61383	0.000459415	0.0124374	-0.239967	3.50337	0.00668865
FZR1	0.207712	3.78144	3.60998	0.000463516	0.0125109	-0.40327	3.501	0.00672821
LINC01640	-1.02437	1.16413	-3.60711	0.00046403	0.0125109	-0.170689	-3.5007	0.00672821
LINC02284	-0.792284	3.22567	-3.60906	0.000464217	0.0125109	-0.316893	-3.5006	0.00672821
AP001505.1	0.380474	2.05958	3.60671	0.000467833	0.0125895	-0.267851	3.49853	0.00677048
LINC01089	0.373862	3.90624	3.61004	0.000469356	0.0126018	-0.435005	3.49766	0.00677706
TMEM175	0.21034	5.06351	3.60578	0.000470395	0.0126018	-0.550349	3.49707	0.00677706
CSRNP3	-0.242129	6.85146	-3.60708	0.000470999	0.0126018	-0.666718	-3.49673	0.00677706
MANEA	0.254268	3.64035	3.60347	0.000471536	0.0126018	-0.434226	3.49643	0.00677706
RPL39	0.607461	6.01421	3.60868	0.000472016	0.0126018	-0.558555	3.49615	0.00677706
SNHG29	0.375352	6.13382	3.6085	0.000472487	0.0126018	-0.586256	3.49589	0.00677706
AC109441.1	-0.554136	-0.0265769	-3.60417	0.000473695	0.0126153	-0.200648	-3.49521	0.00678433
C6orf132	-0.572481	2.26232	-3.60539	0.0004765	0.012664	-0.229709	-3.49363	0.00681054
AC132803.1	-1.02192	4.3847	-3.59915	0.000476932	0.012664	-0.504321	-3.49339	0.00681054
CELSR3	0.338867	2.72169	3.59776	0.000479239	0.0127065	-0.378974	3.4921	0.00683341
CCDC80	-1.31787	-0.413764	-3.59714	0.000482114	0.0127316	-0.250899	-3.4905	0.00684688
RPS14	0.588815	6.86823	3.60233	0.000482147	0.0127316	-0.639329	3.49048	0.00684688
NAALADL2-AS3	-0.611488	-0.452441	-3.60109	0.000482306	0.0127316	-0.231554	-3.4904	0.00684688
AC005343.4	-0.547351	0.979895	-3.60264	0.000483396	0.0127417	-0.203955	-3.48979	0.00685232
RPL34	0.539139	6.87682	3.59934	0.000487629	0.0128345	-0.641597	3.48746	0.00690221
TEX53	-0.562991	0.0454286	-3.59346	0.000492885	0.0129539	-0.232955	-3.48459	0.00696642
AC027682.6	0.322837	3.45719	3.592	0.000494361	0.0129737	-0.433283	3.48379	0.0069771
AC068481.1	-0.671731	4.92133	-3.59839	0.000496309	0.0130059	-0.507314	-3.48274	0.0069944
EXOC1	0.183102	5.94396	3.58475	0.000501518	0.0131233	-0.693323	3.47994	0.00705754
RERGL	-0.898542	0.718583	-3.58313	0.000505301	0.0132031	-0.270841	-3.47793	0.00710045
ZFP30	-0.195078	5.40072	-3.58549	0.000510839	0.0133285	-0.618603	-3.47501	0.00716787
AC124290.1	1.03788	0.805076	3.57764	0.00051352	0.013353	-0.338494	3.4736	0.00718108
AC108159.1	-0.445345	2.5305	-3.58269	0.000513983	0.013353	-0.357981	-3.47336	0.00718108
CBR4	0.140601	6.38701	3.57851	0.000514006	0.013353	-0.729552	3.47335	0.00718108
AC010491.2	-0.491435	0.510942	-3.58166	0.000516142	0.0133725	-0.263683	-3.47224	0.00719154
CLEC4D	0.871115	0.163117	3.5761	0.00051624	0.0133725	-0.263681	3.47219	0.00719154
KLHL3	0.291564	3.28005	3.57705	0.000518109	0.0134001	-0.476704	3.47122	0.00720637
C12orf75	-1.19336	0.905379	-3.57632	0.000518793	0.0134001	-0.275193	-3.47086	0.00720637
TRAF7	0.316921	2.95959	3.57426	0.000520359	0.0134212	-0.444613	3.47005	0.00721776
FBXO15	0.266761	5.39223	3.57243	0.000522856	0.0134522	-0.69777	3.46877	0.00723444
AJ239328.1	0.405995	1.27526	3.57213	0.000523428	0.0134522	-0.344952	3.46847	0.00723444
HIST1H2BE	0.677416	0.527736	3.57504	0.000523803	0.0134522	-0.283035	3.46828	0.00723444
FBXL15	0.356488	4.08462	3.57576	0.000526222	0.0134951	-0.538947	3.46704	0.0072575
TMEM134	0.284155	3.66783	3.5718	0.000530289	0.0135801	-0.506995	3.46497	0.00730319
ACYP2	-0.222906	8.83544	-3.5713	0.000531583	0.013581	-0.85018	-3.46432	0.00730367
HYOU1	0.377963	2.65729	3.56742	0.000531833	0.013581	-0.448767	3.46419	0.00730367
LINC01494	-0.44802	2.60968	-3.57043	0.000532774	0.0135857	-0.380951	-3.46371	0.00730623
LMTK3	-0.647516	6.91166	-3.56781	0.000535283	0.013624	-0.728957	-3.46245	0.00732682
LINC02177	-0.675725	4.37174	-3.57126	0.000535789	0.013624	-0.577034	-3.46219	0.00732682
MPP5	-0.189256	6.87363	-3.56779	0.000537401	0.0136332	-0.779582	-3.46139	0.00733175
RAB1B	0.345268	3.2232	3.56755	0.000538398	0.0136332	-0.487099	3.46089	0.00733175
MYCBP2-AS1	-0.273179	4.88699	-3.57112	0.000538421	0.0136332	-0.646593	-3.46088	0.00733175
HSD11B2	-0.858201	-0.182112	-3.56519	0.000541218	0.0136774	-0.3207	-3.45948	0.00735555
AC083870.1	-0.42819	3.68369	-3.56503	0.000541689	0.0136774	-0.507521	-3.45925	0.00735555
AC090772.1	-0.575842	6.49315	-3.56003	0.000545451	0.0137531	-0.740822	-3.45738	0.00739626
AC102953.2	0.405401	0.381395	3.56009	0.000548056	0.0137995	-0.324279	3.4561	0.00742119
WDR47	-0.194544	6.5024	-3.56272	0.000549171	0.0138083	-0.780617	-3.45555	0.00742591
ACKR4	-0.361163	2.41807	-3.56238	0.000553688	0.0139024	-0.444296	-3.45334	0.00747654
BRAF	-0.166852	8.33482	-3.55517	0.000563103	0.0141191	-0.889806	-3.44879	0.00759309
CLCC1	0.198274	3.55633	3.55022	0.000564301	0.0141295	-0.592656	3.44822	0.00759865
AL031602.2	-0.432502	4.28457	-3.54992	0.000565322	0.0141354	-0.61639	-3.44773	0.00760183
ZNF532	0.803728	5.37608	3.54867	0.000567303	0.0141449	-0.760182	3.44678	0.00760695
THOP1	0.187219	4.70579	3.54919	0.00056778	0.0141449	-0.700264	3.44656	0.00760695
DDX59-AS1	0.539552	0.109712	3.55257	0.000568572	0.0141449	-0.350383	3.44618	0.00760695
CDC16	0.164262	5.64537	3.54798	0.000568845	0.0141449	-0.788874	3.44605	0.00760695
AP003025.2	-0.482787	7.42758	-3.55372	0.000570546	0.0141676	-0.822617	-3.44524	0.00761917
BX255925.3	0.447046	1.94623	3.54333	0.000578707	0.0143505	-0.467961	3.4414	0.00771751
CLDN2	-0.666331	-0.500239	-3.542	0.000580984	0.0143663	-0.410123	-3.44034	0.00772599
NABP2	0.335127	2.89957	3.54474	0.00058268	0.0143663	-0.507335	3.43955	0.00772599
AC044810.2	-0.512395	10.6139	-3.54395	0.000583135	0.0143663	-0.969175	-3.43934	0.00772599
AC007364.1	-0.458563	2.35756	-3.54106	0.00058369	0.0143663	-0.469391	-3.43908	0.00772599
MED25	0.216564	5.3247	3.54209	0.000584317	0.0143663	-0.772462	3.43879	0.00772599
RBP2	-0.601615	3.4835	-3.54644	0.000584327	0.0143663	-0.557504	-3.43879	0.00772599
LINC02398	-1.32721	-1.15648	-3.54311	0.000584929	0.0143663	-0.435638	-3.43851	0.00772599
RBM12	0.311261	3.29322	3.54111	0.000587618	0.0144126	-0.612603	3.43727	0.00775093
AC010531.6	0.432913	1.65879	3.54147	0.000589377	0.0144269	-0.423509	3.43646	0.00775862
RAD21L1	-0.667766	2.93193	-3.54565	0.000589803	0.0144269	-0.486647	-3.43626	0.00775862
NQO2	0.33288	4.24048	3.53576	0.0005925	0.0144733	-0.704158	3.43502	0.00778352
KDM4A-AS1	-0.205808	6.71794	-3.53566	0.000595656	0.0145301	-0.880432	-3.43358	0.00781408
F10	-0.685352	2.15177	-3.53381	0.000596441	0.0145301	-0.431544	-3.43323	0.00781408
AL163541.1	-0.728239	0.56325	-3.53387	0.000598653	0.0145642	-0.398238	-3.43222	0.00783246
MSRA	0.320214	5.22693	3.53345	0.000599786	0.0145721	-0.80831	3.43171	0.0078367
GPATCH8	0.149012	8.64645	3.53682	0.000601383	0.0145912	-0.957033	3.43099	0.00784697
ZNF100	0.303312	3.52964	3.53085	0.000604006	0.014625	-0.658572	3.42981	0.00786513
AP003721.2	-1.0772	1.87751	-3.53011	0.000604553	0.014625	-0.412561	-3.42956	0.00786513
AC009065.4	0.334341	0.919793	3.52952	0.000605212	0.014625	-0.42532	3.42927	0.00786513
ABCA9-AS1	-0.593695	2.64671	-3.53438	0.000610958	0.0147441	-0.519697	-3.4267	0.00792917
AP000857.2	-0.407556	3.8094	-3.53147	0.000614543	0.0148107	-0.661921	-3.42511	0.00796501
CDK2AP2	0.420618	3.59999	3.52802	0.000618946	0.0148969	-0.650285	3.42317	0.00801136
MAP3K15	-0.472228	2.29958	-3.52282	0.00062085	0.0149083	-0.508525	-3.42234	0.0080175
AC005052.2	-0.375053	3.31593	-3.52354	0.000621077	0.0149083	-0.592441	-3.42224	0.0080175
AP004609.3	0.579147	0.737725	3.52391	0.000622304	0.0149179	-0.433241	3.4217	0.00802265
AP002026.1	0.425158	2.66021	3.51822	0.000628878	0.0150365	-0.617283	3.41884	0.00808642
SMCO3	-0.493065	0.732525	-3.52231	0.000628922	0.0150365	-0.444183	-3.41882	0.00808642
MCF2L	0.215989	4.7969	3.515	0.000637565	0.015191	-0.832371	3.41511	0.0081695
PDK2	0.286629	2.82282	3.51511	0.000638564	0.015191	-0.614643	3.41468	0.0081695
MROH6	0.641408	-0.161169	3.51507	0.000639206	0.015191	-0.456602	3.41441	0.0081695
UNC5A	0.331664	3.48405	3.51511	0.000639624	0.015191	-0.697641	3.41423	0.0081695
GPLD1	-0.395432	3.96766	-3.51293	0.000640297	0.015191	-0.700598	-3.41394	0.0081695
AC110015.1	-0.534289	3.30827	-3.51718	0.000640648	0.015191	-0.648974	-3.41379	0.0081695
INPP5K	0.211355	3.92284	3.51635	0.000641289	0.015191	-0.695037	3.41352	0.0081695
SERPINB9P1	-0.995626	0.100852	-3.51436	0.000643864	0.0152319	-0.470661	-3.41243	0.00819152
AC232271.1	0.33608	0.415511	3.51227	0.000647521	0.0152983	-0.466481	3.41089	0.00822723
C6orf201	-0.380462	2.16483	-3.51425	0.000656093	0.0154617	-0.545056	-3.4073	0.00831509
PLXNB2	0.341627	2.31318	3.50545	0.000656664	0.0154617	-0.618081	3.40706	0.00831509
AC099344.1	-0.679421	0.917363	-3.50529	0.000657012	0.0154617	-0.47635	-3.40692	0.00831509
AC008629.1	0.324933	3.45615	3.5043	0.00065943	0.0154983	-0.720469	3.40591	0.00833479
PRPF19	0.269572	3.91453	3.50775	0.00066094	0.0155035	-0.742183	3.40529	0.00833757
PSMC3IP	0.287444	2.60747	3.50623	0.000661372	0.0155035	-0.618213	3.40511	0.00833757
SLC9A3-AS1	0.811809	1.27522	3.50385	0.000663745	0.0155389	-0.512869	3.40413	0.00835661
MSH3	0.161349	6.55335	3.50248	0.000667242	0.0156005	-0.984797	3.4027	0.00838973
AC024257.4	0.600482	-0.507679	3.49839	0.00067253	0.0156758	-0.511903	3.40054	0.00843021
DGAT1	0.267874	3.43224	3.49855	0.000672853	0.0156758	-0.738674	3.40041	0.00843021
AC010261.2	-0.422893	3.77905	-3.51174	0.000673074	0.0156758	-0.697549	-3.40032	0.00843021
GPD1	-0.560952	1.41171	-3.49714	0.000675351	0.0157085	-0.511102	-3.3994	0.0084478
TCAP	0.467761	-0.0751192	3.49736	0.000678231	0.0157551	-0.507814	3.39823	0.00847287
PIAS4	0.293759	4.16599	3.49476	0.000680817	0.0157948	-0.828057	3.39719	0.00849422
OR6J1	-0.678534	1.25719	-3.49647	0.000683287	0.0158317	-0.53661	-3.3962	0.00851407
EEF1D	0.316347	5.17927	3.49854	0.000684427	0.0158377	-0.876985	3.39574	0.00851731
GRM7-AS1	-0.815267	0.0176576	-3.49464	0.000685364	0.015839	-0.533	-3.39537	0.00851802
CPLX4	-0.19647	7.79239	-3.49625	0.000687502	0.0158681	-1.04495	-3.39452	0.00853364
AC004233.2	0.402336	0.618696	3.49133	0.000690898	0.015926	-0.532767	3.39317	0.00856481
AF107885.2	-0.389983	5.95484	-3.49624	0.000692535	0.0159434	-0.929883	-3.39252	0.00857413
AL138760.1	-0.608715	3.14074	-3.49546	0.000695308	0.0159868	-0.715575	-3.39142	0.00859747
LRRC59	0.314544	2.87339	3.49206	0.000698146	0.0160315	-0.663744	3.39031	0.00862155
SVIP	0.262911	5.23853	3.4888	0.000700596	0.0160673	-0.928785	3.38935	0.00864078
FGF1	-0.464067	8.41257	-3.49016	0.000703834	0.0160797	-1.07034	-3.38808	0.00864743
USO1	-0.12572	7.07626	-3.49042	0.000703929	0.0160797	-1.0308	-3.38804	0.00864743
PTPN22	-0.524942	2.58767	-3.48475	0.000704307	0.0160797	-0.640164	-3.3879	0.00864743
MTIF3	0.166829	6.98937	3.49028	0.000704708	0.0160797	-1.03736	3.38774	0.00864743
AP003025.1	-0.420949	7.27719	-3.48983	0.000706664	0.0161039	-1.03296	-3.38698	0.00866046
AC013472.1	-0.402494	1.61725	-3.48593	0.000709637	0.0161512	-0.567961	-3.38583	0.0086859
AL592430.1	-0.45489	3.75019	-3.4864	0.000716738	0.0162922	-0.786498	-3.3831	0.00876174
AC024575.1	0.545223	0.0225494	3.47819	0.000719907	0.0163252	-0.548757	3.38188	0.00877946
KRBOX1	-0.263214	2.67157	-3.48315	0.000720002	0.0163252	-0.663657	-3.38185	0.00877946
SCAF1	0.227496	3.67198	3.48144	0.000723126	0.0163754	-0.797962	3.38066	0.00880647
SLC6A8	0.380103	3.90199	3.47577	0.000725807	0.0163786	-0.847728	3.37964	0.00880821
POLD2	0.207377	4.75477	3.47929	0.000725926	0.0163786	-0.907633	3.3796	0.00880821
BTBD8	0.295556	6.50018	3.47568	0.000725999	0.0163786	-1.07513	3.37957	0.00880821
EIF3F	0.303662	5.37343	3.47872	0.000732844	0.0165124	-0.963761	3.37699	0.00888014
LONRF2	0.440977	4.92383	3.4731	0.000735589	0.0165535	-0.938789	3.37596	0.00890226
AC073263.1	0.294251	3.36156	3.47491	0.000737696	0.0165802	-0.801187	3.37517	0.00891662
C21orf91	-0.353468	3.99048	-3.47389	0.000739052	0.016581	-0.863993	-3.37467	0.00891704
DGKE	-0.18772	7.59919	-3.47465	0.000740096	0.016581	-1.10582	-3.37428	0.00891704
ELOVL1	0.321209	2.75444	3.4698	0.000740495	0.016581	-0.758536	3.37413	0.00891704
RAI14	-0.688977	4.51694	-3.46928	0.000741781	0.0165892	-0.91847	-3.37365	0.00892143
RNASET2	0.345917	2.82794	3.47269	0.000743252	0.0166014	-0.740418	3.37311	0.00892803
PALM	0.52577	1.54614	3.4663	0.000751911	0.0167328	-0.647625	3.36992	0.0089987
CLVS1	-0.578686	1.74666	-3.46628	0.000752575	0.0167328	-0.622165	-3.36967	0.0089987
RPL32	0.521659	7.00317	3.47097	0.000752776	0.0167328	-1.05525	3.3696	0.0089987
RIPOR3	-0.432347	1.23321	-3.46539	0.000753357	0.0167328	-0.610313	-3.36939	0.0089987
ATAD3C	0.685935	-0.0273288	3.46486	0.000753782	0.0167328	-0.588272	3.36923	0.0089987
ZNHIT1	0.316756	3.95274	3.46712	0.000756398	0.0167702	-0.860341	3.36828	0.00901881
MYBL1	0.226839	3.95471	3.46253	0.000759025	0.0168078	-0.907728	3.36732	0.00903901
C2orf49	0.267953	5.03499	3.46427	0.000760654	0.0168232	-0.98043	3.36673	0.00904727
ZDHHC11	0.419796	2.43145	3.45935	0.000767978	0.0168998	-0.77974	3.36409	0.00908847
NPIPB2	0.766146	3.23285	3.4599	0.000768069	0.0168998	-0.80656	3.36405	0.00908847
RPL28	0.467213	6.95113	3.46486	0.000768244	0.0168998	-1.0805	3.36399	0.00908847
LYG1	-0.344938	2.84853	-3.45869	0.000768609	0.0168998	-0.771409	-3.36386	0.00908847
CYBC1	0.478364	3.22127	3.45862	0.000768811	0.0168998	-0.835103	3.36379	0.00908847
C1orf159	0.277505	4.56805	3.46062	0.000770931	0.0169047	-0.967169	3.36303	0.00909114
PPP5C	0.174162	4.6963	3.46188	0.000771218	0.0169047	-0.977277	3.36292	0.00909114
BTBD18	-0.462126	2.71317	-3.45856	0.000771854	0.0169047	-0.736054	-3.3627	0.00909114
ANAPC2	0.342236	2.53227	3.46148	0.00077407	0.0169327	-0.734705	3.3619	0.00910616
AC004884.2	-0.484869	1.08092	-3.46182	0.000776757	0.0169708	-0.654501	-3.36095	0.00912668
AC093797.1	-0.369421	2.66605	-3.46072	0.000779616	0.0169989	-0.81815	-3.35993	0.00914176
TAC4	-0.499638	3.00011	-3.45433	0.000779929	0.0169989	-0.738276	-3.35982	0.00914176
LMLN	0.160266	5.38664	3.45302	0.000791298	0.0172258	-1.06237	3.35582	0.0092638
PAPPA	-0.794011	1.23498	-3.44923	0.000793339	0.0172494	-0.66098	-3.35511	0.00927648
AL008721.2	0.999575	0.301557	3.4485	0.000795274	0.0172706	-0.652583	3.35443	0.0092879
AC015853.2	0.726145	0.319505	3.44664	0.000800873	0.0173712	-0.648296	3.35249	0.00934202
VPS53	0.178782	7.27399	3.44872	0.000802184	0.0173787	-1.18387	3.35204	0.00934605
AP3B1	0.174768	6.79041	3.44998	0.000803294	0.0173818	-1.16156	3.35166	0.00934773
ADD1	-0.210725	9.77965	-3.44706	0.000808029	0.0174633	-1.25902	-3.35003	0.00939154
AC015802.5	0.463294	3.09513	3.44295	0.00081025	0.0174702	-0.899693	3.34927	0.00939525
AMH	0.881086	0.00649259	3.44291	0.000810289	0.0174702	-0.650597	3.34926	0.00939525
RAB41	1.50535	-1.13949	3.44237	0.00081305	0.0175088	-0.716931	3.34831	0.00941599
SLC17A6	-1.3989	-0.0395565	-3.44421	0.00081435	0.0175158	-0.656698	-3.34787	0.00941977
LLGL1	0.473018	0.582494	3.43987	0.000821042	0.0176387	-0.680597	3.3456	0.00948586
RHBDD1	0.159947	6.31531	3.44001	0.000825845	0.0177207	-1.16449	3.34398	0.00952997
AC015982.2	0.49719	1.72271	3.43678	0.000831224	0.0178149	-0.753805	3.34218	0.00958063
LINC01238.1	0.567153	-0.0710457	3.43519	0.00083261	0.0178234	-0.681076	3.34172	0.00958519
CTDNEP1	0.304263	3.61464	3.43756	0.000837281	0.0179021	-0.908666	3.34017	0.00962751
TWIST1	-0.673577	-0.416702	-3.43136	0.000842107	0.0179839	-0.694185	-3.33857	0.00967152
TELO2	0.307109	3.23115	3.43182	0.000843898	0.0179886	-0.899148	3.33798	0.00967401
PRC1	0.32465	1.95503	3.43073	0.000844323	0.0179886	-0.775932	3.33784	0.00967401
MALSU1	0.263896	5.09053	3.43378	0.000845648	0.0179955	-1.08319	3.3374	0.00967775
AC008277.1	-0.514418	2.93836	-3.43504	0.000848189	0.0180065	-0.887931	-3.33657	0.00968365
AC132872.1	0.434612	1.81355	3.43042	0.00084891	0.0180065	-0.786161	3.33633	0.00968365
SAXO2	0.236916	4.7372	3.43245	0.000849687	0.0180065	-1.07086	3.33608	0.00968365
CHCHD6	0.154085	5.73761	3.43085	0.000850165	0.0180065	-1.15343	3.33592	0.00968365
AL109761.1	-0.593221	1.92291	-3.42955	0.000858447	0.0181169	-0.75869	-3.33323	0.00974303
KRCC1	0.297752	4.35258	3.42547	0.000858792	0.0181169	-1.07671	3.33312	0.00974303
KIAA2012	-0.415679	0.929445	-3.42536	0.000859418	0.0181169	-0.715825	-3.33291	0.00974303
HHLA3	0.455777	2.30609	3.42529	0.000860889	0.0181169	-0.837262	3.33244	0.00974303
RAB11B	0.317936	4.38655	3.42806	0.000861456	0.0181169	-1.0321	3.33225	0.00974303
RPL9	0.474537	6.90568	3.43023	0.000861624	0.0181169	-1.17952	3.3322	0.00974303
AC024560.5	-0.326522	3.84176	-3.42832	0.000862422	0.0181169	-0.96855	-3.33194	0.00974303
C9orf131	-0.734195	-0.720092	-3.42643	0.000863675	0.0181221	-0.73271	-3.33154	0.00974581
RPS8	0.439908	6.43324	3.42795	0.000868157	0.0181746	-1.16437	3.3301	0.00977406
AC099521.1	0.435655	-0.181643	3.42527	0.000868198	0.0181746	-0.715565	3.33008	0.00977406
AL121929.2	-0.437207	4.98654	-3.42192	0.000872876	0.0182155	-1.09269	-3.32859	0.00979606
AC022784.5	-0.417129	1.92206	-3.42365	0.000872911	0.0182155	-0.773998	-3.32858	0.00979606
UTP23	0.251084	5.07138	3.4249	0.000873187	0.0182155	-1.12723	3.32849	0.00979606
AP001107.9	0.267417	3.68341	3.42408	0.00087456	0.018223	-0.977897	3.32805	0.00980011
ARRDC3	0.496593	6.22576	3.41911	0.000877189	0.0182567	-1.22249	3.32721	0.0098182
ANGPTL1	-0.447652	7.44273	-3.42109	0.000878605	0.0182626	-1.23873	-3.32676	0.00982139
SLC38A4	-0.644906	0.930482	-3.42311	0.000879503	0.0182626	-0.728227	-3.32648	0.00982139
AL136295.7	0.39793	0.559836	3.41897	0.000883321	0.0183208	-0.737023	3.32527	0.00985267
SEPTIN1	0.306088	3.33949	3.42037	0.000885559	0.0183461	-0.920261	3.32457	0.00986627
AP000779.1	-0.645533	2.54902	-3.42097	0.000889431	0.018398	-0.886722	-3.32335	0.00989418
NBPF15	0.204755	5.23197	3.41444	0.000892205	0.018398	-1.17575	3.32248	0.00989418
PRPSAP1	0.173927	4.83459	3.41398	0.000892243	0.018398	-1.13581	3.32247	0.00989418
L3MBTL4	1.17964	-0.779796	3.41391	0.000892849	0.018398	-0.751937	3.32228	0.00989418
RPS3	0.482655	6.82404	3.41951	0.000893174	0.018398	-1.20244	3.32218	0.00989418
NR6A1	-0.19979	7.61366	-3.41564	0.000895657	0.018428	-1.29608	-3.3214	0.00991034
AC016583.2	-0.98247	1.79515	-3.41119	0.000900579	0.0185081	-0.805436	-3.31987	0.00995342
TSR2	0.30898	4.51423	3.41542	0.000903642	0.0185499	-1.06608	3.31893	0.0099759
NFXL1	0.18682	5.07319	3.40917	0.000907763	0.0185983	-1.17433	3.31766	0.0100019
MGAT5B	0.491068	1.44749	3.40893	0.000908067	0.0185983	-0.830971	3.31756	0.0100019
ZNF444	0.168955	3.91436	3.4129	0.000909523	0.018607	-1.03698	3.31711	0.0100066
MED9	-0.200718	4.00774	-3.40845	0.000917343	0.0187396	-1.04769	-3.31472	0.0100779
CA3	-0.323923	3.43504	-3.40583	0.000918088	0.0187396	-1.00896	-3.3145	0.0100779
PBX2	0.265464	1.79394	3.40494	0.000923714	0.0188331	-0.837679	3.31279	0.0101282
WDR18	0.361841	3.18042	3.40523	0.000928705	0.0189066	-0.964593	3.31128	0.0101677
MACROD1	0.235347	5.23173	3.40284	0.000930269	0.0189066	-1.19678	3.31081	0.0101677
WBP2	0.441187	6.42378	3.40397	0.000931251	0.0189066	-1.26447	3.31051	0.0101677
AC067852.2	0.491562	0.31815	3.40431	0.000931659	0.0189066	-0.773853	3.31039	0.0101677
KIF26B	-0.41136	2.92965	-3.4011	0.000932571	0.0189066	-0.921544	-3.31012	0.0101677
ZNF706	0.186445	5.62112	3.40409	0.000934825	0.018931	-1.22443	3.30944	0.0101808
AC126773.3	-0.508175	0.684518	-3.40114	0.000939173	0.0189941	-0.782066	-3.30814	0.0102148
FAT2	-0.59886	-0.39646	-3.40046	0.000940692	0.0189941	-0.793064	-3.30769	0.0102148
KBTBD11-OT1	0.413136	2.21749	3.39785	0.000941544	0.0189941	-0.930259	3.30744	0.0102148
C20orf96	0.21789	3.5859	3.39784	0.00094216	0.0189941	-1.04549	3.30725	0.0102148
AL109824.1	-0.330244	6.10921	-3.40035	0.000950477	0.0191403	-1.24193	-3.30479	0.0102934
ST3GAL6	-0.350325	2.55384	-3.40022	0.000952487	0.0191422	-0.953559	-3.3042	0.0102944
AC022001.3	-0.559932	0.155025	-3.39409	0.000953044	0.0191422	-0.793526	-3.30403	0.0102944
AC005703.4	-0.441182	0.331735	-3.39484	0.000953758	0.0191422	-0.798001	-3.30382	0.0102944
CCDC61	0.31806	1.45839	3.39239	0.000958443	0.0191947	-0.863262	3.30245	0.0103227
DMAC1	0.433435	3.24892	3.39498	0.00095851	0.0191947	-1.01534	3.30243	0.0103227
AC018695.9	-0.45154	6.17729	-3.39609	0.000961689	0.019222	-1.2465	-3.3015	0.0103373
COL6A6	-0.567098	4.61273	-3.39126	0.000962006	0.019222	-1.16491	-3.30141	0.0103373
SLC16A9	0.779213	1.69907	3.39056	0.000964256	0.0192328	-0.923797	3.30075	0.0103432
RGP1	0.190792	3.52675	3.39355	0.00096518	0.0192328	-1.05125	3.30048	0.0103432
AC002310.1	0.435864	1.08967	3.39482	0.000965754	0.0192328	-0.822834	3.30032	0.0103432
AC092142.1	-0.426375	2.59216	-3.39036	0.000968774	0.0192716	-0.950642	-3.29944	0.010364
AC079145.1	0.369024	1.39416	3.38879	0.000973111	0.0192996	-0.847959	3.29819	0.010379
BRD3OS	0.30814	3.28009	3.39233	0.000973187	0.0192996	-1.03156	3.29817	0.010379
AP001107.1	-0.485065	1.16167	-3.3921	0.000974744	0.0192996	-0.830411	-3.29772	0.010379
CCDC92	0.228004	5.67042	3.39016	0.000975055	0.0192996	-1.27707	3.29763	0.010379
AL133480.1	-0.390017	4.91245	-3.39002	0.000975537	0.0192996	-1.17316	-3.29749	0.010379
NUP210	0.25478	4.95031	3.38628	0.000978261	0.0193322	-1.23744	3.29671	0.0103966
AL353784.1	-0.564053	9.3304	-3.38768	0.000987801	0.0194993	-1.41798	-3.29398	0.0104865
HTT-AS	-0.445555	2.53726	-3.38729	0.000993269	0.0195713	-0.938814	-3.29243	0.0105252
TPRG1L	0.343808	3.49634	3.38604	0.000993622	0.0195713	-1.04663	3.29233	0.0105252
AL157834.2	-0.530974	2.60236	-3.38359	0.00100067	0.0196886	-0.96487	-3.29034	0.0105883
LINC02802	0.468231	1.18045	3.37978	0.00100209	0.019695	-0.861018	3.28994	0.0105917
RPS11	0.498695	6.25172	3.38249	0.00100807	0.0197799	-1.30195	3.28827	0.0106374
ZNF214	0.148456	4.1698	3.38257	0.00100861	0.0197799	-1.14986	3.28811	0.0106374
RAB40C	0.267302	3.07152	3.37456	0.0010181	0.0199443	-1.06493	3.28548	0.0107258
NCK1-DT	0.172269	3.94694	3.37564	0.00102499	0.0199881	-1.15	3.28358	0.0107493
ENTPD6	0.188626	3.43511	3.372	0.0010253	0.0199881	-1.12958	3.28349	0.0107493
AC004982.2	-0.253938	4.82213	-3.37173	0.00102614	0.0199881	-1.25079	-3.28326	0.0107493
SNHG19	0.500552	2.87749	3.3761	0.00102698	0.0199881	-1.02299	3.28303	0.0107493
AP000880.1	0.502057	0.151801	3.37108	0.00102878	0.0199881	-0.864015	3.28253	0.0107493
RPS25	0.47674	6.70662	3.37628	0.00102964	0.0199881	-1.33615	3.2823	0.0107493
AL589765.6	0.458884	-0.238684	3.37256	0.00102984	0.0199881	-0.859809	3.28224	0.0107493
TEDC1	0.412382	1.16015	3.37141	0.00102988	0.0199881	-0.89433	3.28224	0.0107493
AC118555.1	-0.503093	2.4334	-3.37554	0.00103033	0.0199881	-0.987901	-3.28211	0.0107493
INPPL1	0.328616	3.50331	3.36829	0.00103791	0.0201078	-1.17079	3.28004	0.0108137
NPEPL1	-0.391812	2.41605	-3.36834	0.00103971	0.0201078	-0.993726	-3.27955	0.0108137
AL160159.1	-0.607215	-0.80208	-3.37306	0.00103985	0.0201078	-0.863118	-3.27952	0.0108137
LINC02012	0.477697	0.0564817	3.36849	0.0010428	0.0201118	-0.867705	3.27872	0.0108159
GRTP1-AS1	-0.4372	3.92513	-3.36711	0.00104407	0.0201118	-1.14206	-3.27837	0.0108159
AL354733.2	-0.258418	3.00134	-3.36967	0.00104441	0.0201118	-1.06012	-3.27828	0.0108159
EDEM3	0.17093	5.71409	3.36658	0.00104452	0.0201118	-1.35695	3.27825	0.0108159
TTC39A	-0.749055	1.18339	-3.36779	0.00104628	0.0201242	-0.890359	-3.27778	0.0108225
REEP3	-0.164116	7.09354	-3.36651	0.00105144	0.0202017	-1.41305	-3.27639	0.0108642
MACROD2-AS1	-0.499505	3.25227	-3.36771	0.00105307	0.0202115	-1.05213	-3.27595	0.0108695
KNDC1	0.709939	0.19171	3.3613	0.001062	0.0203612	-0.897706	3.27357	0.01095
AC034195.1	-0.422905	5.65957	-3.36139	0.00106731	0.0204412	-1.33667	-3.27216	0.010993
CCDC91	-0.175583	8.63655	-3.36304	0.00107048	0.0204788	-1.4893	-3.27132	0.0110132
AC110491.3	-0.394899	3.18423	-3.36333	0.00107201	0.0204788	-1.12449	-3.27091	0.0110132
MELTF-AS1	0.439209	2.12093	3.35842	0.00107268	0.0204788	-1.03872	3.27074	0.0110132
AC073167.1	-0.391704	5.19924	-3.363	0.00107574	0.0205131	-1.28218	-3.26993	0.0110317
CDC34	0.311597	4.33242	3.36104	0.00107676	0.0205131	-1.22731	3.26966	0.0110317
CENPE	0.468638	1.50691	3.3564	0.0010791	0.0205191	-0.95455	3.26905	0.0110349
TMEM86B	0.419466	0.982661	3.3576	0.00107991	0.0205191	-0.931539	3.26884	0.0110349
LINC00599	0.216053	8.90423	3.36017	0.00108049	0.0205191	-1.50913	3.26868	0.0110349
OSBPL7	0.261394	2.76508	3.35565	0.00108375	0.0205592	-1.11226	3.26783	0.0110565
NR1D1	0.468935	3.55213	3.35539	0.0010873	0.0205619	-1.15569	3.26691	0.0110579
AP000842.2	-0.446579	2.83548	-3.3542	0.00108732	0.0205619	-1.07901	-3.2669	0.0110579
KLHL26	0.27856	1.53781	3.35538	0.00108828	0.0205619	-0.96864	3.26665	0.0110579
SCAF11	0.17491	8.14586	3.35435	0.00108858	0.0205619	-1.51762	3.26657	0.0110579
LINC00609	-0.770797	-0.624492	-3.35304	0.00109133	0.0205619	-0.91859	-3.26586	0.0110579
AC005670.3	0.126382	5.84691	3.359	0.00109205	0.0205619	-1.37016	3.26567	0.0110579
THAP2	0.249866	3.8463	3.35722	0.00109349	0.0205619	-1.19813	3.2653	0.0110579
CBR3-AS1	-0.478798	0.901573	-3.35226	0.00109387	0.0205619	-0.913191	-3.2652	0.0110579
XRCC5	0.111663	7.46528	3.35305	0.00109418	0.0205619	-1.49081	3.26512	0.0110579
CTTN	0.174553	5.45492	3.3521	0.00109562	0.0205619	-1.37422	3.26475	0.0110579
LINC01843	-0.49362	2.36524	-3.35293	0.00109666	0.0205619	-1.01879	-3.26448	0.0110579
TRPV4	-0.521247	1.08777	-3.35122	0.00109759	0.0205619	-0.933609	-3.26424	0.0110579
AP001178.3	-0.381109	4.32556	-3.35382	0.00110189	0.0206209	-1.22472	-3.26313	0.0110896
PDCD6	0.142318	5.14836	3.35036	0.00110632	0.0206824	-1.35106	3.26199	0.0111227
RPLP2	0.438768	5.95146	3.35314	0.00110945	0.0206979	-1.3624	3.26119	0.011131
RNPEPL1	0.314606	1.63296	3.34794	0.00110945	0.0206979	-1.02366	3.26119	0.011131
ATXN7L1	0.674586	1.83644	3.34741	0.00111139	0.0207126	-1.03408	3.2607	0.0111389
TSPEAR	2.49279	0.748106	3.34691	0.00111321	0.0207162	-0.982041	3.26023	0.0111409
LINC01694	0.655717	-0.187105	3.34788	0.00111388	0.0207162	-0.924976	3.26006	0.0111409
GUCY1A2	-0.432036	3.62231	-3.34469	0.00112311	0.0208591	-1.2106	-3.25772	0.0112177
NAALADL2-AS2	-0.514271	0.460668	-3.34637	0.00112389	0.0208591	-0.933423	-3.25752	0.0112177
RPS13	0.523703	6.6993	3.34557	0.00113798	0.0210935	-1.42736	3.25399	0.0113438
AC006378.1	-0.45933	1.58289	-3.34283	0.00113904	0.0210935	-1.00876	-3.25372	0.0113438
KIF13A	-0.285583	7.80292	-3.34341	0.00114003	0.0210935	-1.51459	-3.25347	0.0113438
TBC1D25	-0.225559	4.10728	-3.34385	0.00114536	0.0211703	-1.23555	-3.25215	0.0113851
RPL37	0.40359	6.08225	3.34249	0.0011476	0.02119	-1.41611	3.25159	0.0113957
ARG1	-0.61369	1.60655	-3.34292	0.00115281	0.0212511	-0.980462	-3.25031	0.0114286
SPRED2	-0.727724	5.9664	-3.33668	0.00115327	0.0212511	-1.39265	-3.25019	0.0114286
EPN1	0.176968	4.54267	3.33741	0.00115903	0.0213354	-1.31615	3.24878	0.0114739
ZNF337-AS1	-0.155572	5.82047	-3.33978	0.0011616	0.0213405	-1.41248	-3.24814	0.0114766
CLEC11A	0.350073	3.65774	3.3372	0.00116168	0.0213405	-1.24138	3.24813	0.0114766
MIR3659HG	0.527828	2.91049	3.33209	0.00116891	0.0214514	-1.1651	3.24636	0.0115363
WDR20	-0.161594	7.743	-3.3333	0.00117257	0.0214967	-1.55323	-3.24547	0.0115606
AC084361.1	-0.428142	6.21823	-3.33596	0.00117457	0.0215105	-1.44954	-3.24498	0.0115681
CACNA1G	1.53772	-0.598218	3.33085	0.00117571	0.0215105	-0.987131	3.24471	0.0115681
AC010082.1	-0.430216	-0.44613	-3.33468	0.00117913	0.0215441	-0.969857	-3.24388	0.0115862
DTYMK	0.320995	3.21986	3.33108	0.00118076	0.0215441	-1.20555	3.24349	0.0115862
MTCP1	-0.38265	5.01262	-3.33289	0.00118197	0.0215441	-1.36796	-3.24319	0.0115862
DNMBP-AS1	-0.386637	4.26891	-3.33099	0.00118234	0.0215441	-1.30747	-3.24311	0.0115862
NSUN6	0.196171	5.5422	3.32926	0.00118504	0.0215716	-1.44845	3.24246	0.0116009
GNA11	0.241003	3.26225	3.32717	0.00118889	0.0216059	-1.23212	3.24153	0.0116194
ZNF641	0.223392	4.27314	3.32536	0.00119471	0.0216059	-1.34989	3.24014	0.0116194
AC018511.2	-0.448291	2.06487	-3.32915	0.0011965	0.0216059	-1.06357	-3.23971	0.0116194
LZTR1	0.204348	3.98698	3.32576	0.00119682	0.0216059	-1.31017	3.23964	0.0116194
ARRB2	0.306432	2.49983	3.32483	0.00119696	0.0216059	-1.14766	3.2396	0.0116194
AC005856.1	-0.387752	3.02409	-3.3304	0.00119722	0.0216059	-1.19609	-3.23954	0.0116194
AL355112.1	-0.66475	-0.44181	-3.32984	0.00119774	0.0216059	-0.982623	-3.23942	0.0116194
AC010175.1	-0.566728	-0.297345	-3.32434	0.00119848	0.0216059	-0.986264	-3.23924	0.0116194
C12orf50	-0.600992	-0.380831	-3.32472	0.00119921	0.0216059	-0.991889	-3.23907	0.0116194
EIF2D	0.164301	4.25293	3.32486	0.00119946	0.0216059	-1.33979	3.23901	0.0116194
INO80E	0.202473	3.702	3.3239	0.00120015	0.0216059	-1.29877	3.23884	0.0116194
RWDD3	0.20247	4.01266	3.32742	0.00120235	0.0216059	-1.30363	3.23832	0.0116194
NUDT14	0.353287	3.19193	3.32596	0.00120253	0.0216059	-1.19357	3.23828	0.0116194
MAPK8IP1	0.287507	2.97878	3.32213	0.00121158	0.0217468	-1.19177	3.23614	0.0116951
AC107294.2	0.412933	1.01972	3.31976	0.00121714	0.0218249	-1.05011	3.23483	0.0117371
AC003956.1	0.583186	-0.0425712	3.31927	0.00121975	0.021847	-0.997588	3.23422	0.011749
EFR3A	0.205684	8.0944	3.3197	0.0012208	0.021847	-1.61854	3.23397	0.011749
AL139317.5	-0.265255	6.24965	-3.32214	0.00122334	0.0218707	-1.4947	-3.23338	0.0117617
RPL35A	0.48301	6.41797	3.32215	0.00122831	0.0219226	-1.47666	3.23222	0.0117897
TRPM6	-0.58683	2.22011	-3.3214	0.00122966	0.0219226	-1.08713	-3.23191	0.0117897
RNF111	-0.147587	7.34056	-3.32172	0.0012299	0.0219226	-1.56477	-3.23185	0.0117897
AC005070.3	-0.301843	2.41788	-3.31706	0.00123697	0.0220189	-1.12935	-3.23022	0.0118415
UNC13D	0.570329	4.52965	3.31443	0.00123774	0.0220189	-1.4183	3.23004	0.0118415
TLCD3B	0.311314	6.452	3.31732	0.00124064	0.0220486	-1.53314	3.22937	0.0118575
ATP2C2	-0.399171	3.38341	-3.31581	0.00124417	0.0220591	-1.22064	-3.22856	0.0118631
KRBA1	0.25104	1.70277	3.31259	0.00124527	0.0220591	-1.10774	3.2283	0.0118631
CDKL5	-0.181129	6.80456	-3.31356	0.00124549	0.0220591	-1.57299	-3.22825	0.0118631
AC138024.1	-0.539079	0.990825	-3.31777	0.00124613	0.0220591	-1.086	-3.22811	0.0118631
SCD	-0.933745	0.626303	-3.31329	0.00125012	0.0221011	-1.03166	-3.22719	0.0118857
GNG10	0.251211	3.85424	3.31514	0.00125096	0.0221011	-1.30911	3.227	0.0118857
AC016134.1	-0.511441	0.227107	-3.30857	0.00126719	0.022366	-1.03351	-3.22331	0.0120281
NUMBL	0.298286	1.96231	3.30451	0.0012783	0.0225347	-1.18676	3.22081	0.0121188
AL109955.1	-0.661297	0.327147	-3.30428	0.00127925	0.0225347	-1.03705	-3.22059	0.0121188
RPL29	0.489959	6.21628	3.30867	0.0012831	0.0225803	-1.50296	3.21973	0.0121434
AL049552.1	-0.480772	4.09047	-3.30895	0.00128613	0.0226116	-1.36965	-3.21906	0.0121602
AL807761.4	-0.466588	2.87721	-3.30677	0.00129055	0.0226671	-1.27896	-3.21807	0.01219
RPA2	0.171138	4.46362	3.30451	0.00129325	0.0226743	-1.40884	3.21747	0.0121939
GET4	0.520445	0.0757254	3.30045	0.00129622	0.0226743	-1.06214	3.21681	0.0121939
AL031428.1	-0.342926	4.91944	-3.30463	0.00129728	0.0226743	-1.44667	-3.21658	0.0121939
CRELD2	0.284556	3.66951	3.30003	0.00129808	0.0226743	-1.34275	3.2164	0.0121939
METTL5	0.195377	4.18368	3.30353	0.00129834	0.0226743	-1.37825	3.21635	0.0121939
RPL27	0.533607	5.66366	3.30445	0.0013003	0.0226743	-1.48748	3.21591	0.0121939
ARL6IP4	0.293878	5.61641	3.30195	0.00130096	0.0226743	-1.51698	3.21577	0.0121939
LINC02320	-0.415469	4.7013	-3.30102	0.00130103	0.0226743	-1.41569	-3.21575	0.0121939
FAM193B	0.186609	5.61212	3.29896	0.00130321	0.0226903	-1.5528	3.21527	0.0122025
MTHFD2	-0.465472	2.45992	-3.2989	0.00130528	0.0227043	-1.18135	-3.21482	0.0122101
ABTB1	0.252971	4.44315	3.30098	0.00130973	0.0227597	-1.42863	3.21384	0.0122399
TMEM63A	-0.552891	0.893301	-3.29681	0.0013111	0.0227616	-1.07786	-3.21354	0.0122409
C5orf24	0.208077	4.57823	3.29919	0.00131565	0.0228104	-1.44654	3.21254	0.0122671
USP12-AS1	-0.447819	3.12187	-3.29807	0.00131645	0.0228104	-1.24691	-3.21237	0.0122671
AC005393.1	0.449868	1.46003	3.29501	0.00132058	0.0228327	-1.15138	3.21147	0.0122791
PSG9	-0.897931	-0.583782	-3.29597	0.0013213	0.0228327	-1.07726	-3.21131	0.0122791
TMEM150C	-0.598552	2.6401	-3.29444	0.00132154	0.0228327	-1.22444	-3.21126	0.0122791
CEBPZ	0.223776	6.26608	3.29537	0.00132395	0.0228525	-1.59421	3.21074	0.0122898
IMPDH2	0.360645	2.5083	3.29388	0.0013295	0.0229262	-1.21045	3.20953	0.0123294
AC005540.1	-0.56975	-0.4835	-3.29439	0.00133359	0.0229444	-1.07801	-3.20865	0.0123392
EDC4	0.237822	2.99888	3.29143	0.00133369	0.0229444	-1.3274	3.20863	0.0123392
CAP2	-0.670443	1.6676	-3.29326	0.00133438	0.0229444	-1.11656	-3.20848	0.0123392
GP1BB	0.830277	0.269097	3.28922	0.00134464	0.0230988	-1.09745	3.20628	0.0124222
C5orf22	-0.17544	4.57902	-3.29058	0.00134832	0.0231115	-1.45933	-3.20549	0.012429
ZNF629	0.235075	2.31299	3.29169	0.00134856	0.0231115	-1.21238	3.20544	0.012429
SOCS5	0.383043	2.18965	3.28989	0.00134923	0.0231115	-1.23343	3.2053	0.012429
IGSF21	1.27183	2.66527	3.28747	0.00135219	0.0231403	-1.28379	3.20467	0.0124445
TRNP1	0.649695	3.85595	3.28676	0.00135683	0.0231801	-1.3781	3.20368	0.012466
AC093835.1	0.328671	0.496909	3.28959	0.00135815	0.0231801	-1.09202	3.2034	0.012466
F2RL2	-0.278456	3.91348	-3.29142	0.001359	0.0231801	-1.38976	-3.20322	0.012466
TRIM28	0.322554	3.70823	3.28905	0.00136077	0.0231801	-1.36851	3.20285	0.012466
DGCR6L	0.358902	3.07498	3.28818	0.00136354	0.0231801	-1.29771	3.20226	0.012466
RPL17	0.429798	7.28872	3.28965	0.00136375	0.0231801	-1.62683	3.20222	0.012466
AC048382.5	-0.252755	4.28729	-3.2863	0.0013645	0.0231801	-1.42123	-3.20206	0.012466
PPP1R9B	0.545959	0.380439	3.28556	0.00136482	0.0231801	-1.10277	3.20199	0.012466
HOGA1	-0.41944	0.114766	-3.28395	0.00136639	0.0231848	-1.09238	-3.20166	0.0124685
AKR1E2	-0.306709	4.49595	-3.28536	0.00136853	0.0231994	-1.45367	-3.20121	0.0124763
AC069029.1	-0.400246	1.3124	-3.28697	0.00137205	0.0232222	-1.14658	-3.20047	0.0124886
P3H3	0.319063	5.17965	3.28225	0.00137391	0.0232222	-1.57251	3.20008	0.0124886
TNIP3	0.601172	1.59348	3.28346	0.00137396	0.0232222	-1.21925	3.20007	0.0124886
ANGPT2	-0.480401	3.78308	-3.28493	0.00137504	0.0232222	-1.38021	-3.19984	0.0124886
Z69706.1	0.484242	0.178029	3.28444	0.00137694	0.0232325	-1.10439	3.19944	0.0124941
AC116099.1	-0.728414	-0.561351	-3.28251	0.00137842	0.0232357	-1.10674	-3.19913	0.0124958
SLC1A2	-0.27515	9.00658	-3.28243	0.00138403	0.0233084	-1.74153	-3.19796	0.0125349
EIF2S3	-0.14916	5.93145	-3.28173	0.00138746	0.0233296	-1.61693	-3.19725	0.0125463
EYA1	-0.850625	-0.433506	-3.27912	0.00138907	0.0233296	-1.12318	-3.19691	0.0125463
AL137139.2	-0.434614	2.26911	-3.28486	0.00138917	0.0233296	-1.20384	-3.19689	0.0125463
DIPK1A	-0.283635	4.82644	-3.27773	0.00140105	0.0234979	-1.54716	-3.19443	0.0126369
AL049637.1	-0.400005	2.40516	-3.28177	0.00140271	0.0234979	-1.26361	-3.19409	0.0126369
NSUN2	0.258212	4.49592	3.27575	0.00140311	0.0234979	-1.53589	3.19401	0.0126369
LINC00582	-0.505419	1.76664	-3.27607	0.0014065	0.0235326	-1.18075	-3.19331	0.0126555
PRR7	0.391495	3.03838	3.27758	0.00141106	0.0235709	-1.33117	3.19238	0.0126761
PAN2	0.24448	4.50179	3.27487	0.00141252	0.0235709	-1.54568	3.19208	0.0126761
AL160006.1	0.304498	1.81698	3.27368	0.00141314	0.0235709	-1.23899	3.19195	0.0126761
DOCK6	-0.415385	3.47707	-3.27553	0.00141402	0.0235709	-1.35594	-3.19177	0.0126761
BGLAP	0.457202	1.42802	3.27329	0.00141992	0.0236474	-1.1904	3.19057	0.0127172
ZNF883	-0.283273	4.90267	-3.27229	0.00142335	0.0236827	-1.55162	-3.18987	0.0127362
PARP6	0.158124	4.86318	3.27284	0.00142484	0.0236855	-1.56262	3.18957	0.0127378
AL118506.1	0.380857	0.749955	3.27163	0.00142747	0.0237074	-1.15382	3.18904	0.0127495
NTM-AS1	-0.37862	6.39392	-3.27439	0.00143492	0.0237943	-1.62969	-3.18753	0.0127963
AC096576.2	-0.535619	5.00204	-3.2736	0.00143535	0.0237943	-1.58017	-3.18745	0.0127963
RHOXF1-AS1	-0.413389	3.10826	-3.27276	0.00143694	0.0237988	-1.40005	-3.18713	0.0127987
AP3M1	-0.221952	4.94727	-3.26947	0.00144114	0.0238464	-1.55663	-3.18628	0.0128243
RTL9	-1.19113	1.33874	-3.26901	0.0014445	0.02388	-1.18011	-3.18561	0.0128423
CDK3	0.380929	1.20738	3.26619	0.001447	0.0238854	-1.22711	3.18511	0.0128452
RPLP0	0.480307	7.0977	3.27098	0.00144748	0.0238854	-1.6693	3.18501	0.0128452
SIK2	-0.210961	9.1158	-3.26732	0.00145781	0.0240338	-1.78914	-3.18295	0.012925
AC055855.2	0.434674	1.47414	3.26339	0.00146007	0.0240491	-1.24131	3.1825	0.0129333
TRADD	0.339962	1.36218	3.26561	0.00146186	0.0240565	-1.21027	3.18215	0.0129373
SGIP1	-0.266995	10.635	-3.26578	0.00146359	0.0240629	-1.8187	-3.18181	0.0129407
MED22	0.270942	2.30824	3.2639	0.00146836	0.0241194	-1.30082	3.18086	0.0129711
CHML	0.390397	1.5747	3.26392	0.00147205	0.024158	-1.23813	3.18014	0.0129918
NFASC	0.349241	8.72619	3.26054	0.00147558	0.0241776	-1.81817	3.17944	0.0130024
DHX16	-0.209261	5.47994	-3.26267	0.00147593	0.0241776	-1.61086	-3.17937	0.0130024
NEFM	-1.28319	2.85494	-3.26058	0.00147861	0.0241897	-1.29818	-3.17885	0.0130089
HS3ST1	-0.965118	0.767366	-3.26681	0.00147935	0.0241897	-1.15128	-3.1787	0.0130089
GIPR	0.341849	5.17354	3.25822	0.00148456	0.0242335	-1.62685	3.17769	0.0130324
AL139220.2	0.327197	4.21958	3.26088	0.00148473	0.0242335	-1.50825	3.17765	0.0130324
ZBTB20-AS3	-0.391897	1.84566	-3.26098	0.00149479	0.0243757	-1.24729	-3.17569	0.0131089
ANGPTL2	-0.396065	1.99923	-3.26096	0.00149793	0.0244042	-1.28486	-3.17508	0.0131243
AC010996.1	0.555556	-0.400618	3.25678	0.00149926	0.0244042	-1.17622	3.17483	0.0131243
TADA2B	0.224457	4.42773	3.25797	0.00150274	0.0244388	-1.56495	3.17415	0.0131429
STYXL1	0.292609	4.56872	3.25319	0.00150968	0.0245295	-1.58067	3.17282	0.0131916
AC100803.4	0.637699	5.30434	3.25153	0.00152293	0.0247028	-1.64054	3.17028	0.0132848
AL162171.2	-0.357342	2.80483	-3.25431	0.00152328	0.0247028	-1.35499	-3.17021	0.0132848
LOXL2	-0.380447	4.39463	-3.25141	0.00152446	0.0247028	-1.54983	-3.16999	0.0132848
RACK1	0.393419	6.41644	3.25414	0.00152771	0.0247301	-1.69759	3.16937	0.0132995
CTSA	0.357722	3.61949	3.24968	0.00152942	0.0247301	-1.48295	3.16904	0.0132995
IP6K1	-0.17876	6.67595	-3.25147	0.00153026	0.0247301	-1.73738	-3.16888	0.0132995
RC3H1	-0.191697	7.39099	-3.24967	0.00153218	0.0247389	-1.79179	-3.16852	0.0133042
ANKUB1	-0.323155	6.75501	-3.25257	0.00153462	0.0247561	-1.72407	-3.16806	0.0133135
SNPH	0.305824	3.66969	3.24755	0.00153941	0.0248111	-1.53022	3.16715	0.0133431
LINC00539	-0.345521	4.52591	-3.24734	0.00154096	0.0248138	-1.55595	-3.16686	0.0133445
LRFN2	-0.47229	5.44612	-3.2488	0.00155115	0.0249557	-1.65138	-3.16494	0.0134208
ALKBH3-AS1	-0.4572	0.863923	-3.24534	0.00156735	0.0251938	-1.24656	-3.16191	0.0135489
RPL10A	0.555603	5.84122	3.24555	0.00157004	0.0252076	-1.67199	3.16142	0.0135563
CAPN10	0.196444	3.33153	3.24165	0.00157101	0.0252076	-1.47159	3.16124	0.0135563
ADAP2	0.325453	4.38491	3.24092	0.00157303	0.0252176	-1.61314	3.16086	0.0135617
USF1	-0.249775	3.42522	-3.24169	0.00157902	0.0252779	-1.46032	-3.15975	0.0135941
CCDC32	-0.236839	5.18719	-3.23898	0.00157961	0.0252779	-1.66176	-3.15965	0.0135941
AC004828.1	-0.783657	0.448312	-3.23863	0.0015816	0.0252874	-1.22608	-3.15928	0.0135992
AC016526.1	-0.686932	0.114144	-3.23953	0.00158373	0.0252968	-1.21925	-3.15889	0.0136043
TMEM218	0.218258	3.70121	3.24119	0.001585	0.0252968	-1.51884	3.15865	0.0136043
HCG27	0.345326	2.09423	3.23904	0.00158761	0.0253057	-1.35077	3.15817	0.0136091
JAKMIP2-AS1	-0.501506	6.45857	-3.24299	0.00158837	0.0253057	-1.69288	-3.15803	0.0136091
AC026704.1	-0.386164	4.6052	-3.23867	0.00159263	0.0253511	-1.61363	-3.15725	0.0136335
ECHS1	0.323988	3.95424	3.23843	0.00160061	0.0254506	-1.54199	3.1558	0.013687
LNX1	-0.457571	1.48346	-3.23471	0.00160207	0.0254506	-1.28544	-3.15553	0.013687
AL161772.1	0.518425	1.65519	3.23613	0.00160424	0.0254506	-1.31283	3.15513	0.013687
LINC02763	-0.551505	1.58937	-3.23466	0.00160454	0.0254506	-1.3157	-3.15508	0.013687
LINC00051	-1.06122	0.832013	-3.23513	0.00160716	0.0254545	-1.23123	-3.1546	0.0136891
CA1	-0.43244	3.31669	-3.23666	0.00160761	0.0254545	-1.44623	-3.15452	0.0136891
XIST	-0.895709	1.32619	-3.23203	0.00161464	0.0255434	-1.2955	-3.15325	0.0137369
AL499604.1	-0.575701	0.427137	-3.2335	0.00161767	0.0255563	-1.24088	-3.1527	0.0137439
VAMP8	-0.34468	2.87957	-3.23169	0.00162023	0.0255563	-1.41018	-3.15224	0.0137439
SREBF2	-0.228074	6.42199	-3.23448	0.00162038	0.0255563	-1.76646	-3.15221	0.0137439
SPDYE6	-0.665175	1.29603	-3.2306	0.00162205	0.0255563	-1.29057	-3.15191	0.0137439
LINC00471	0.399339	2.57334	3.23176	0.00162256	0.0255563	-1.40072	3.15182	0.0137439
RPS6	0.417108	6.90598	3.23529	0.00162409	0.0255582	-1.76328	3.15154	0.0137448
AC010168.1	-0.460065	5.55868	-3.23297	0.00162635	0.0255703	-1.67592	-3.15114	0.0137514
MIR4458HG	0.45567	3.30804	3.23063	0.0016277	0.0255703	-1.49416	3.1509	0.0137514
AL049828.2	-0.759412	-0.533675	-3.23247	0.00162923	0.0255719	-1.24299	-3.15062	0.0137522
C12orf60	-0.276514	5.91966	-3.23004	0.00163425	0.025615	-1.73945	-3.14972	0.0137754
TARSL2	0.192328	5.80294	3.22897	0.00163482	0.025615	-1.74938	3.14962	0.0137754
E2F3	-0.389215	4.18359	-3.23121	0.00163656	0.0256199	-1.60678	-3.14931	0.0137781
AL353586.1	-0.513241	1.1585	-3.22731	0.0016392	0.025639	-1.27168	-3.14884	0.0137883
SPOUT1	0.26574	2.26956	3.22735	0.00164167	0.0256554	-1.41252	3.1484	0.0137971
AL157400.3	0.332914	2.6606	3.22712	0.00164899	0.0257474	-1.46063	3.1471	0.0138466
AL731533.2	0.643183	1.67389	3.22526	0.00165131	0.0257613	-1.36863	3.14669	0.0138541
CLEC4A	0.501188	1.61347	3.22409	0.00165614	0.0258142	-1.36739	3.14583	0.0138825
AC007405.3	0.429103	1.20856	3.22601	0.00166073	0.0258294	-1.29512	3.14502	0.0138907
NPC1	-0.2297	6.28186	-3.22496	0.00166146	0.0258294	-1.78352	-3.1449	0.0138907
NCDN	0.345462	2.69314	3.22283	0.0016628	0.0258294	-1.48733	3.14466	0.0138907
AC011632.1	-0.876917	-0.91325	-3.22271	0.00166344	0.0258294	-1.27667	-3.14455	0.0138907
CYP39A1	0.275857	3.95513	3.22257	0.00166428	0.0258294	-1.62996	3.1444	0.0138907
AC108449.1	-0.488019	4.38718	-3.22594	0.00166788	0.02586	-1.6348	-3.14377	0.0139072
WWC2	-0.173537	8.31463	-3.22522	0.00166933	0.02586	-1.89243	-3.14351	0.0139072
PLA2G4B	0.351631	1.6017	3.22137	0.00167056	0.02586	-1.37811	3.1433	0.0139072
IPO13	0.294883	2.77076	3.22099	0.00168045	0.0259526	-1.4847	3.14157	0.0139569
AL031714.1	-0.44704	1.09311	-3.22031	0.00168074	0.0259526	-1.30087	-3.14152	0.0139569
NFE4	-0.422158	3.09714	-3.22448	0.00168089	0.0259526	-1.55195	-3.14149	0.0139569
RBAK	0.230596	3.8027	3.21943	0.00168231	0.0259526	-1.63251	3.14125	0.0139569
THAP10	0.354994	2.29914	3.2208	0.00168685	0.0260003	-1.41214	3.14046	0.0139826
PSPN	0.3885	-0.295545	3.21825	0.00169141	0.0260482	-1.27855	3.13967	0.0140084
ADAMTSL4	0.625526	0.255108	3.2192	0.00169367	0.0260608	-1.29081	3.13927	0.0140151
AC078909.2	0.449458	0.772127	3.21676	0.00169534	0.0260643	-1.32685	3.13898	0.014017
PRTFDC1	-0.276446	5.75642	-3.22382	0.00169741	0.0260738	-1.74715	-3.13863	0.0140221
RPS24	0.429485	6.98153	3.22036	0.00170081	0.0261037	-1.81868	3.13804	0.0140382
GDPD5	0.194444	7.16281	3.21779	0.00170469	0.0261254	-1.87187	3.13737	0.0140499
AC024075.3	-0.408765	2.36596	-3.21686	0.00170529	0.0261254	-1.41045	-3.13727	0.0140499
HTR2B	-0.412293	1.69347	-3.21962	0.00170658	0.0261254	-1.42318	-3.13705	0.0140499
EBF4	0.524476	2.2015	3.21406	0.00171575	0.0262409	-1.45627	3.13548	0.014112
AC116616.1	-0.818615	1.80241	-3.21287	0.00171728	0.0262409	-1.34164	-3.13522	0.014112
SNHG32	0.400916	4.92227	3.21722	0.00171849	0.0262409	-1.68009	3.13501	0.014112
AC107982.2	-0.574995	-0.46865	-3.21373	0.00172779	0.0263605	-1.29452	-3.13342	0.0141763
AC122129.1	-0.401	1.30753	-3.21093	0.00173187	0.0264004	-1.33184	-3.13273	0.0141978
CD6	-0.977532	0.698842	-3.2106	0.00173601	0.0264411	-1.29331	-3.13203	0.0142197
LINC01505	-0.460516	3.83952	-3.20757	0.00174567	0.0265657	-1.63936	-3.1304	0.0142867
ZNF660	0.218025	4.07713	3.20645	0.00175492	0.0266654	-1.69344	3.12885	0.0143403
AC233723.1	0.396641	0.489692	3.20612	0.00175518	0.0266654	-1.32349	3.12881	0.0143403
NGEF	-0.899857	-1.1302	-3.20962	0.00176067	0.0267262	-1.32797	-3.12789	0.014373
TOLLIP	0.222061	3.71898	3.20519	0.0017635	0.0267467	-1.62046	3.12742	0.014384
A3GALT2	-0.624995	-0.436623	-3.20471	0.00176622	0.0267654	-1.31428	-3.12696	0.0143941
PKDCC	0.399331	6.47925	3.20302	0.00177173	0.026804	-1.8814	3.12605	0.0144148
AC069272.1	-0.413274	4.11711	-3.20419	0.00177175	0.026804	-1.64585	-3.12604	0.0144148
TKFC	0.257738	2.91523	3.2023	0.00177516	0.0268098	-1.549	3.12548	0.0144179
LINC01963	0.4618	1.03459	3.20514	0.00177544	0.0268098	-1.34485	3.12543	0.0144179
RPS12	0.563124	6.93846	3.20654	0.00177791	0.0268098	-1.84042	3.12502	0.0144179
C22orf39	0.308659	3.02477	3.20405	0.00177808	0.0268098	-1.52963	3.12499	0.0144179
ERCC4	0.167042	4.24493	3.20397	0.00178259	0.0268361	-1.68827	3.12425	0.0144321
CCDC136	0.91243	1.7458	3.20102	0.00178429	0.0268361	-1.39796	3.12397	0.0144321
ZNF10	-0.258217	5.97287	-3.20548	0.0017843	0.0268361	-1.82074	-3.12397	0.0144321
SLC6A6	-0.266938	9.88454	-3.20234	0.00179313	0.0269463	-1.9936	-3.12251	0.0144914
CELF5	1.26047	0.227742	3.19881	0.00179533	0.0269569	-1.33004	3.12215	0.014497
AC013460.1	-0.927654	0.356453	-3.19812	0.00179947	0.0269965	-1.3302	-3.12148	0.0145183
PPP1R12C	0.242353	3.55921	3.1976	0.0018028	0.027024	-1.65878	3.12093	0.0145331
DRD3	-0.54609	0.987765	-3.19765	0.00180632	0.0270542	-1.35489	-3.12036	0.0145494
NT5C2	-0.169246	7.6575	-3.19941	0.0018125	0.0271242	-1.94392	-3.11935	0.014587
AL442071.2	-0.42618	3.82416	-3.19472	0.00181869	0.027159	-1.63737	-3.11835	0.0146057
TBCD	0.230129	5.66584	3.1961	0.00181887	0.027159	-1.84689	3.11832	0.0146057
CARMIL1	-0.578274	5.47185	-3.19501	0.00181935	0.027159	-1.82639	-3.11824	0.0146057
POU4F1	-1.09131	-1.30194	-3.19714	0.0018231	0.0271776	-1.36792	-3.11763	0.0146158
ADAMTSL1	-0.75708	2.03657	-3.194	0.00182362	0.0271776	-1.45074	-3.11755	0.0146158
KRTAP10-4	2.4341	-0.616575	3.19365	0.00183012	0.0272398	-1.34509	3.1165	0.0146492
LMNB2	0.205817	3.1126	3.19242	0.00183214	0.0272398	-1.60015	3.11617	0.0146492
CFC1	0.468545	0.567892	3.19636	0.00183382	0.0272398	-1.35365	3.1159	0.0146492
NBPF3	0.210389	3.58337	3.19224	0.00183614	0.0272398	-1.69111	3.11553	0.0146492
RNF208	0.549386	1.63997	3.19308	0.00183693	0.0272398	-1.43047	3.1154	0.0146492
AL592528.1	-0.592499	1.57981	-3.19503	0.00183724	0.0272398	-1.40306	-3.11535	0.0146492
PCNX3	0.292499	2.54615	3.19124	0.00183988	0.0272398	-1.57062	3.11493	0.0146492
AC004830.2	-0.738464	2.55782	-3.19122	0.00184038	0.0272398	-1.53485	-3.11485	0.0146492
LINC02458	-0.448655	1.71698	-3.19172	0.00184248	0.0272398	-1.42687	-3.11451	0.0146492
EIF2AK3-DT	0.433155	0.907529	3.19054	0.00184292	0.0272398	-1.39326	3.11444	0.0146492
ZNF793-AS1	0.34629	2.66842	3.19069	0.00185598	0.0274103	-1.53528	3.11236	0.0147409
SRP14-AS1	0.194993	5.11872	3.18967	0.0018576	0.0274118	-1.82312	3.1121	0.0147417
ATP2C1	-0.188814	7.53547	-3.18715	0.00186274	0.0274652	-1.98509	-3.11129	0.0147704
TMEM187	0.353426	1.87094	3.18728	0.00186547	0.0274829	-1.46864	3.11085	0.0147799
TAPT1-AS1	0.225237	6.20125	3.18818	0.00186716	0.0274841	-1.91345	3.11059	0.0147806
SLC4A10	-0.747891	5.42015	-3.18626	0.00186914	0.0274841	-1.82666	-3.11027	0.0147806
AC129803.1	-0.337642	3.5939	-3.18601	0.00187013	0.0274841	-1.65094	-3.11012	0.0147806
AC068308.1	-0.386789	4.37364	-3.18968	0.0018754	0.0275009	-1.72367	-3.10929	0.0147896
AC012085.2	-0.471857	6.26067	-3.18929	0.00187739	0.0275009	-1.86945	-3.10897	0.0147896
AC009365.4	-0.40591	1.62417	-3.18917	0.00187769	0.0275009	-1.44314	-3.10893	0.0147896
AP003393.1	-0.777401	2.05182	-3.18649	0.00187793	0.0275009	-1.42734	-3.10889	0.0147896
KDM4D	0.231135	3.35315	3.18529	0.00187891	0.0275009	-1.65822	3.10873	0.0147896
AAAS	0.175206	3.74962	3.1839	0.00188459	0.0275444	-1.69799	3.10784	0.014813
FBXO36	-0.157691	6.42047	-3.18731	0.00188891	0.0275444	-1.90114	-3.10716	0.014813
CRADD	-0.233849	8.40403	-3.18503	0.00188936	0.0275444	-2.01498	-3.10709	0.014813
INTS6-AS1	0.281603	4.41949	3.18609	0.00188998	0.0275444	-1.74884	3.107	0.014813
ADCY1	0.267424	9.03022	3.18385	0.00189027	0.0275444	-2.04483	3.10695	0.014813
MC1R	0.382737	2.04173	3.18393	0.00189106	0.0275444	-1.51744	3.10683	0.014813
SEMA6A	-0.37425	4.4694	-3.18582	0.0019005	0.02764	-1.73828	-3.10536	0.0148644
CTSS	-0.304387	3.97175	-3.18648	0.0019007	0.02764	-1.71358	-3.10532	0.0148644
RELL1	-0.187774	5.01343	-3.18234	0.0019058	0.0276918	-1.81992	-3.10453	0.0148923
SCTR	-0.614419	2.37518	-3.18275	0.00191746	0.0278387	-1.49419	-3.10273	0.0149713
BCL2L12	0.46566	0.34852	3.17668	0.00192604	0.0279407	-1.4001	3.10141	0.0150261
AL136979.1	-0.418085	2.47917	-3.1779	0.00193344	0.0280256	-1.53727	-3.10027	0.0150718
SLC38A8	-0.849967	-0.460747	-3.17421	0.00194034	0.028103	-1.38958	-3.09921	0.0151134
SPACA6	0.669379	0.682732	3.17538	0.0019472	0.0281796	-1.40982	3.09817	0.0151546
CRY1	-0.232996	6.10283	-3.17555	0.00195244	0.0282304	-1.89662	-3.09737	0.0151819
FAM104A	-0.190037	4.83727	-3.17428	0.00195384	0.0282304	-1.8135	-3.09716	0.0151819
LINC02053	-0.480187	1.11222	-3.17385	0.00195652	0.0282464	-1.42622	-3.09675	0.0151905
AL512625.3	-0.385615	3.53567	-3.17398	0.00195846	0.0282517	-1.68518	-3.09646	0.0151934
STARD4-AS1	-0.372244	5.23106	-3.17323	0.00196388	0.0283073	-1.84846	-3.09564	0.0152233
AL136456.1	-0.44693	0.607305	-3.17085	0.00196603	0.0283156	-1.42228	-3.09532	0.0152278
IPO5	0.175833	4.52861	3.16991	0.00196857	0.0283295	-1.83346	3.09493	0.0152352
CHTF18	0.417273	1.60419	3.16921	0.00197122	0.0283342	-1.50246	3.09453	0.0152378
PSG8-AS1	-0.474943	0.306779	-3.1695	0.00197354	0.0283342	-1.41597	-3.09419	0.0152378
AL049552.2	-0.39701	3.37113	-3.1692	0.00197362	0.0283342	-1.64958	-3.09417	0.0152378
SEMA4B	0.264269	7.5477	3.16714	0.00198605	0.0284843	-2.04971	3.09231	0.0153185
AC073475.1	-0.238635	4.04512	-3.16822	0.00198829	0.0284843	-1.76382	-3.09198	0.0153185
CDK16	0.271215	3.0997	3.16689	0.00198882	0.0284843	-1.69421	3.0919	0.0153185
APH1B	-0.195412	5.3009	-3.17139	0.00199076	0.0284894	-1.86035	-3.09161	0.0153212
AC068633.1	-0.376123	1.1961	-3.16453	0.00200126	0.0286169	-1.4775	-3.09004	0.0153898
TP53BP1	-0.120568	7.20732	-3.16807	0.00200834	0.0286953	-2.00987	-3.089	0.015432
PRDM15	0.222576	2.99974	3.16261	0.00201318	0.0287417	-1.68645	3.08828	0.0154569
PPP1R37	0.202544	4.45925	3.1657	0.00201771	0.0287835	-1.79663	3.08761	0.0154794
RPS17	0.467952	4.89306	3.16418	0.00203028	0.0289246	-1.85938	3.08577	0.0155553
MAP3K7	0.178477	5.92766	3.16038	0.00203366	0.0289246	-1.97586	3.08527	0.0155553
TCFL5	0.182869	3.47126	3.15926	0.00203394	0.0289246	-1.75258	3.08523	0.0155553
GNRHR	-0.640593	0.272306	-3.16349	0.00203402	0.0289246	-1.43468	-3.08522	0.0155553
UBE2L6	0.478842	1.42987	3.16042	0.00203658	0.028938	-1.49768	3.08485	0.0155625
ENPP1	-0.917001	-0.806045	-3.16131	0.00203822	0.0289385	-1.43589	-3.08461	0.0155627
RBM47	-1.06523	0.0747802	-3.16037	0.00204128	0.0289591	-1.42737	-3.08416	0.0155738
AF165147.1	-0.375849	4.78373	-3.15755	0.00204571	0.028993	-1.87619	-3.08351	0.015592
MAP10	-0.428135	2.26487	-3.15857	0.00204688	0.028993	-1.59419	-3.08334	0.015592
POMZP3	-0.297956	4.16743	-3.1582	0.00205123	0.0290043	-1.77455	-3.08271	0.0155981
EIF2B1	0.220176	4.4869	3.15685	0.00205193	0.0290043	-1.85478	3.08261	0.0155981
DNAJB7	-0.451936	1.03408	-3.15901	0.00205311	0.0290043	-1.47009	-3.08244	0.0155981
GRHL1	0.265122	3.49994	3.15701	0.00205413	0.0290043	-1.75515	3.08229	0.0155981
FAM92A	-0.392803	1.8164	-3.15626	0.00206838	0.0291826	-1.52509	-3.08023	0.015694
EPM2A	-0.317334	5.25356	-3.15331	0.00207358	0.0292116	-1.9328	-3.07949	0.0157096
LIX1-AS1	-0.29412	3.55805	-3.15756	0.00207368	0.0292116	-1.76084	-3.07947	0.0157096
C20orf204	0.386596	0.768693	3.15349	0.00207902	0.0292639	-1.49109	3.07871	0.0157378
MTMR3	-0.139657	6.91771	-3.15562	0.00208222	0.029272	-2.0314	-3.07825	0.0157421
TMEM88	0.699906	0.514708	3.15109	0.0020869	0.029272	-1.49571	3.07758	0.0157421
GK-AS1	-0.362168	4.67457	-3.15381	0.00208738	0.029272	-1.84693	-3.07751	0.0157421
DHX8	-0.165863	5.44182	-3.15247	0.00208774	0.029272	-1.92801	-3.07746	0.0157421
FAM138C	1.02081	2.61724	3.15095	0.00208785	0.029272	-1.62791	3.07744	0.0157421
TESC-AS1	-0.505792	0.827004	-3.15416	0.00209055	0.029272	-1.46147	-3.07706	0.0157421
FERMT2	-0.120313	6.50549	-3.1527	0.00209097	0.029272	-2.01772	-3.077	0.0157421
LZTS2	0.368984	1.68276	3.15021	0.0020927	0.0292733	-1.58401	3.07675	0.0157428
OVCH2	-0.409472	8.18568	-3.15256	0.00209439	0.0292742	-2.09678	-3.07651	0.0157433
TMX1	-0.202319	6.10968	-3.15161	0.00210326	0.0293516	-1.98576	-3.07525	0.0157849
SPARC	-0.55058	5.85057	-3.14842	0.00210451	0.0293516	-1.98535	-3.07507	0.0157849
BANP	0.217117	5.9134	3.14848	0.00210613	0.0293516	-2.00776	3.07484	0.0157849
STRADB	-0.30682	5.82262	-3.1506	0.00210644	0.0293516	-1.98998	-3.0748	0.0157849
ASNSD1	0.393366	3.79042	3.15075	0.00211472	0.0294442	-1.80648	3.07363	0.0158347
VCPIP1	0.184445	4.03789	3.14904	0.00212148	0.0295154	-1.83233	3.07268	0.015873
LMBRD2	0.148632	4.69892	3.14588	0.00212479	0.0295234	-1.92327	3.07221	0.0158773
GPX4	0.441074	5.93324	3.14919	0.00212533	0.0295234	-1.96464	3.07214	0.0158773
PLPPR2	0.259036	2.62517	3.14481	0.00212846	0.0295441	-1.69851	3.0717	0.0158884
MAGT1	0.206216	3.95367	3.14651	0.00213968	0.0296769	-1.82021	3.07013	0.0159598
SGSM3	0.200969	4.35331	3.14317	0.00214215	0.0296884	-1.89865	3.06978	0.015966
NARF	0.331544	5.36454	3.14201	0.00214775	0.0297265	-1.97293	3.069	0.0159865
FTX	-0.143141	9.81034	-3.14586	0.00214968	0.0297265	-2.15593	-3.06873	0.0159865
AL022323.1	-0.433694	2.61536	-3.14562	0.00214985	0.0297265	-1.63643	-3.06871	0.0159865
AL157385.2	-0.570134	0.832525	-3.14283	0.00215154	0.029727	-1.48699	-3.06847	0.0159868
AKR1B1	0.238562	3.88128	3.14441	0.00215386	0.0297361	-1.80446	3.06815	0.0159917
RPL10	0.418322	7.6539	3.14502	0.00215754	0.0297642	-2.0645	3.06764	0.0160068
NPDC1	0.293534	4.80592	3.1402	0.00216008	0.0297763	-1.92469	3.06729	0.0160133
CLPX	0.164668	5.40738	3.13968	0.00216643	0.0298411	-1.9901	3.06641	0.0160481
SMIM17	-0.355871	1.08768	-3.1387	0.00216964	0.0298624	-1.53182	-3.06597	0.0160596
ADAM15	0.190021	3.91675	3.14123	0.00217555	0.0299045	-1.83116	3.06516	0.0160822
SLC18A2	-0.451763	1.1958	-3.13917	0.00217602	0.0299045	-1.52474	-3.06509	0.0160822
AMN1	-0.184175	7.54766	-3.14054	0.00217779	0.029906	-2.09817	-3.06485	0.0160831
AP000282.1	-0.783076	0.190962	-3.13736	0.00218205	0.0299105	-1.48545	-3.06427	0.0160855
SENP7	0.134765	6.83119	3.14012	0.00218294	0.0299105	-2.08449	3.06414	0.0160855
EEF2	0.362564	5.49535	3.14064	0.0021831	0.0299105	-1.96429	3.06412	0.0160855
LAMP3	-0.47081	0.639861	-3.13664	0.00218594	0.0299266	-1.52218	-3.06373	0.0160941
AC008610.1	0.352222	1.96396	3.13661	0.00218932	0.0299356	-1.63142	3.06327	0.016099
MAGI2-AS3	0.188968	5.58606	3.13685	0.00218993	0.0299356	-2.02017	3.06319	0.016099
SORCS3	0.69717	-0.282903	3.13498	0.00219652	0.030003	-1.49692	3.06229	0.0161352
BRCA1	0.166245	5.57303	3.13763	0.00219863	0.030009	-2.00658	3.062	0.0161384
ITGB1	0.155333	6.11047	3.13488	0.00220128	0.0300224	-2.05619	3.06164	0.0161456
ARRDC1-AS1	0.2238	3.35259	3.13306	0.00220868	0.0300543	-1.78886	3.06063	0.0161628
LYPLAL1-DT	-0.27791	3.00625	-3.13284	0.00220988	0.0300543	-1.75207	-3.06047	0.0161628
EIF4EBP2	0.148841	4.5071	3.13573	0.00221104	0.0300543	-1.91067	3.06032	0.0161628
AL137100.3	-0.609337	5.23804	-3.13839	0.00221123	0.0300543	-1.92526	-3.06029	0.0161628
CXorf40B	0.302853	1.62897	3.1359	0.00221196	0.0300543	-1.58064	3.06019	0.0161628
AL590822.1	0.533228	-0.488408	3.13421	0.00221533	0.0300688	-1.49987	3.05974	0.0161706
MAML2	-0.368215	7.84306	-3.13308	0.00221658	0.0300688	-2.15357	-3.05957	0.0161706
NRXN2	0.543352	3.59217	3.13333	0.00221804	0.0300688	-1.77464	3.05937	0.0161706
LURAP1L-AS1	-0.43369	3.91358	-3.12992	0.00223709	0.0303043	-1.83857	-3.05681	0.0162972
LINC01011	0.484332	2.47632	3.1276	0.002247	0.0304156	-1.70135	3.05548	0.0163571
NFYB	0.249877	4.61757	3.13033	0.00224991	0.0304321	-1.93268	3.05509	0.016366
RPS15A	0.409826	6.58185	3.13066	0.00225677	0.0304784	-2.04942	3.05418	0.0163909
NPL	0.254362	3.16684	3.12931	0.00225685	0.0304784	-1.76926	3.05417	0.0163909
ABCE1	0.147175	4.96393	3.12588	0.00225841	0.0304784	-2.01074	3.05396	0.0163909
RAD51C	0.150865	4.71427	3.12415	0.00227099	0.0306252	-1.98148	3.0523	0.0164698
COL10A1	-0.451804	3.18966	-3.12789	0.00227335	0.0306341	-1.83435	-3.05198	0.0164746
MRPL10	0.252265	3.44685	3.12733	0.00227768	0.0306682	-1.78684	3.05141	0.0164929
C8orf34	-0.545456	0.126498	-3.12574	0.00227929	0.0306682	-1.52732	-3.0512	0.0164929
ENSA	-0.190464	6.8512	-3.12489	0.00228204	0.0306822	-2.10383	-3.05084	0.0165005
AC108472.1	-0.409272	4.4428	-3.12626	0.00229137	0.0307847	-1.94846	-3.04961	0.0165556
RAB24	0.371198	2.31698	3.121	0.00230385	0.0309171	-1.71343	3.04798	0.0166268
ETNK1	-0.187595	6.73319	-3.11911	0.00230763	0.0309171	-2.1398	-3.04749	0.0166268
VAC14	0.180528	4.35067	3.11943	0.00231116	0.0309171	-1.94103	3.04703	0.0166268
KHSRP	0.215727	4.79676	3.12005	0.00231145	0.0309171	-1.98812	3.04699	0.0166268
ESRRB	-0.320293	9.32835	-3.12188	0.00231146	0.0309171	-2.21048	-3.04699	0.0166268
PTPN14	-0.575649	-0.336157	-3.11847	0.00231153	0.0309171	-1.53348	-3.04698	0.0166268
AC021613.1	0.828313	1.29755	3.11805	0.002315	0.0309406	-1.5917	3.04653	0.0166395
TTC33	-0.113576	5.83689	-3.1187	0.00232657	0.0310721	-2.08124	-3.04503	0.0167102
RPL11	0.415316	7.41797	3.12054	0.00232853	0.0310753	-2.12294	3.04478	0.0167119
LINC01772	-0.349139	3.5168	-3.1171	0.00233846	0.0311847	-1.81253	-3.0435	0.0167707
PDIA4	0.295871	2.53462	3.11419	0.0023423	0.0312127	-1.77328	3.043	0.0167858
RNF34	-0.162036	5.86962	-3.11603	0.0023444	0.0312177	-2.07336	-3.04273	0.0167885
AL353604.1	-0.891738	1.80416	-3.11759	0.00235218	0.031298	-1.59629	-3.04174	0.0168317
YARS2	-0.141138	5.03925	-3.11279	0.00235556	0.0313049	-2.01963	-3.0413	0.0168354
AP001825.1	-0.414847	5.74655	-3.11603	0.00235617	0.0313049	-2.04471	-3.04123	0.0168354
KLF16	0.314269	4.25768	3.11566	0.00235845	0.031312	-1.93621	3.04094	0.0168392
AL359915.1	-0.456703	1.39044	-3.11153	0.00236356	0.0313352	-1.62578	-3.04028	0.0168516
PURB	0.243785	5.24249	3.11546	0.00236367	0.0313352	-2.04528	3.04027	0.0168516
AL353807.5	0.38456	0.0229125	3.11068	0.00236815	0.0313531	-1.56369	3.0397	0.0168613
MEGF9	-0.148796	8.09064	-3.1144	0.00236939	0.0313531	-2.20265	-3.03954	0.0168613
AC007622.2	-0.46258	2.47082	-3.11361	0.00237188	0.0313531	-1.74079	-3.03922	0.0168613
UROS	0.160364	4.82641	3.11329	0.00237199	0.0313531	-1.99111	3.03921	0.0168613
MAP4K4	-0.54369	4.00032	-3.10847	0.00238495	0.0314658	-1.9413	-3.03757	0.0169219
KLC3	0.447795	0.659449	3.10833	0.00238546	0.0314658	-1.6052	3.0375	0.0169219
PARVA	-1.09024	0.0921515	-3.10857	0.00238576	0.0314658	-1.56099	-3.03747	0.0169219
OSTC	0.192668	4.58588	3.10856	0.00239109	0.0314968	-2.00954	3.03679	0.0169386
LINC01422	-0.730061	0.681037	-3.10794	0.00239161	0.0314968	-1.57771	-3.03673	0.0169386
CELF2-AS1	-0.548909	-0.695644	-3.10683	0.00241908	0.0318353	-1.56983	-3.03328	0.0171206
PDRG1	0.302597	2.9765	3.1052	0.00243031	0.0319552	-1.80636	3.03189	0.0171851
AC022634.2	-1.19923	-0.740083	-3.10378	0.00243174	0.0319552	-1.58919	-3.03171	0.0171851
AL627309.5	0.303422	1.2795	3.10163	0.00243578	0.0319849	-1.6786	3.03121	0.0172011
MARVELD3	-0.539721	3.83207	-3.10141	0.00243867	0.0319995	-1.90714	-3.03085	0.0172089
SLC25A33	-0.220803	6.3344	-3.10393	0.00244076	0.0320036	-2.13059	-3.03059	0.0172111
AC068282.1	-0.340008	6.53849	-3.10274	0.00244315	0.0320117	-2.13124	-3.03029	0.0172154
ABCG5	-0.438485	1.91117	-3.09993	0.00244859	0.0320596	-1.68676	-3.02962	0.0172413
CNTFR	0.563145	1.24301	3.0998	0.0024575	0.0321529	-1.66197	3.02853	0.0172914
AC005291.2	-0.450917	1.24402	-3.10201	0.00245977	0.0321593	-1.63387	-3.02825	0.0172948
POLR2L	0.487385	4.11063	3.10134	0.00246197	0.0321647	-1.94063	3.02798	0.0172977
SLC25A29	0.295902	7.23973	3.09829	0.00246634	0.0321983	-2.22787	3.02744	0.0173158
AP000763.3	-0.320016	2.11421	-3.09802	0.00247495	0.0322874	-1.73737	-3.02639	0.0173637
ZNF318	0.177173	5.07006	3.09471	0.00249011	0.0324615	-2.11297	3.02454	0.0174574
SOAT1	-0.178196	5.50014	-3.09552	0.00249729	0.0325317	-2.10009	-3.02367	0.0174951
ZNF503-AS2	0.250518	2.71565	3.09388	0.00250755	0.0326274	-1.8106	3.02243	0.0175466
FAU	0.494635	6.57528	3.09647	0.00250826	0.0326274	-2.14348	3.02234	0.0175466
HNRNPA3	0.157509	7.17267	3.09197	0.0025231	0.0327829	-2.24233	3.02056	0.0176302
DYRK4	0.226936	4.13645	3.09089	0.00252386	0.0327829	-2.01255	3.02047	0.0176302
DAB1	-0.520451	4.73735	-3.09008	0.00253106	0.0328527	-2.07455	-3.0196	0.0176677
AL137018.1	-0.537535	0.989452	-3.08854	0.00253678	0.0329032	-1.68432	-3.01892	0.0176949
LIME1	0.359492	2.07235	3.0901	0.00254444	0.0329787	-1.77733	3.01801	0.0177355
PSME2	0.348496	3.48714	3.08905	0.0025515	0.0330465	-1.91126	3.01717	0.017772
IGSF9B	0.380514	3.72972	3.08632	0.00255505	0.0330687	-2.00895	3.01674	0.0177839
KLC1	0.133157	6.78588	3.08799	0.00256282	0.0331275	-2.22119	3.01582	0.0178155
AL360270.1	-0.472009	2.09393	-3.0865	0.00256327	0.0331275	-1.76026	-3.01577	0.0178155
AC104248.1	-0.456797	0.535197	-3.08543	0.00256577	0.033136	-1.63454	-3.01548	0.0178201
SH3RF1	-0.583687	1.63794	-3.08708	0.00258214	0.0333147	-1.72572	-3.01355	0.0179162
AC105219.1	0.425369	-0.0202034	3.08258	0.00258387	0.0333147	-1.65257	3.01334	0.0179162
AC012370.2	-1.21296	2.42145	-3.0823	0.00258609	0.0333147	-1.70956	-3.01308	0.0179162
CEP63	0.114925	6.40465	3.08248	0.00258701	0.0333147	-2.22651	3.01297	0.0179162
SDCBP2	-0.323172	1.53447	-3.08168	0.00259103	0.0333309	-1.7123	-3.0125	0.0179249
CBLL1	-0.183268	4.45749	-3.08157	0.00259197	0.0333309	-2.0865	-3.01239	0.0179249
AL135937.1	-0.71782	3.33111	-3.07867	0.00261578	0.033613	-1.90903	-3.00962	0.0180766
TNFRSF6B	0.350096	1.55826	3.0776	0.00262397	0.0336942	-1.76894	3.00867	0.0181203
AC025188.1	-0.365488	3.10807	-3.08137	0.00262616	0.0336984	-1.88595	-3.00841	0.0181225
ABHD14B	0.330049	5.56385	3.07851	0.00263646	0.0338064	-2.14914	3.00722	0.0181806
CHST4	-0.36472	2.47909	-3.0763	0.00263835	0.0338065	-1.79776	-3.00701	0.0181807
CHRNA10	0.335843	0.470633	3.0753	0.0026432	0.0338446	-1.69484	3.00645	0.0182012
TUG1	0.229531	5.72395	3.07826	0.00264561	0.0338514	-2.19238	3.00617	0.0182049
CASTOR1	0.361032	1.26383	3.07496	0.00264804	0.0338584	-1.74096	3.00589	0.0182086
AL122035.1	-0.353763	4.19426	-3.0735	0.00265786	0.0339464	-2.03657	-3.00477	0.0182559
ALDH8A1	-0.438758	1.62585	-3.07373	0.00266037	0.0339464	-1.76949	-3.00448	0.0182559
RPS18	0.519493	7.00599	3.07729	0.00266057	0.0339464	-2.21975	3.00445	0.0182559
SOD2	-0.177881	6.12827	-3.07424	0.00266724	0.0340074	-2.20594	-3.00369	0.0182887
LINC00551	-0.558022	3.49139	-3.07447	0.00267087	0.0340295	-1.94132	-3.00328	0.0183006
SLAIN2	-0.179349	7.46701	-3.07018	0.00269057	0.0342501	-2.31614	-3.00104	0.0184192
PCDHA9	0.522097	-0.0453939	3.06931	0.00269199	0.0342501	-1.67345	3.00088	0.0184192
AC007619.1	-0.360248	2.34945	-3.07215	0.00269767	0.0342982	-1.81477	-3.00024	0.0184451
TAFA4	1.15688	0.80789	3.06817	0.0027019	0.0343277	-1.69165	2.99976	0.018461
RPL14	0.377115	6.63723	3.07215	0.00270383	0.034328	-2.22329	2.99954	0.0184611
AC092620.2	-0.569757	-0.222309	-3.0694	0.00270646	0.0343371	-1.66539	-2.99925	0.018466
LINC02080	-0.542466	0.985501	-3.06894	0.00271283	0.0343937	-1.73651	-2.99853	0.0184965
PRELP	-1.56027	-0.389578	-3.0666	0.00271593	0.0344088	-1.6646	-2.99818	0.0185046
SLC25A6	0.375589	6.24146	3.07025	0.00271883	0.0344213	-2.21062	2.99786	0.0185113
NAT14	0.366755	3.53779	3.06572	0.00274169	0.0346863	-1.98009	2.99531	0.0186538
HGSNAT	-0.175508	6.39225	-3.06737	0.0027446	0.0346988	-2.23781	-2.99498	0.0186606
CACNA2D1	-0.568602	6.49063	-3.06339	0.00274704	0.0347052	-2.29451	-2.99471	0.018664
LMF2	0.354516	3.18996	3.06216	0.00275281	0.0347332	-1.95987	2.99407	0.018679
AC004217.1	-0.430404	-0.0557955	-3.06394	0.00275311	0.0347332	-1.67924	-2.99404	0.018679
APOA1-AS	-0.3949	3.69769	-3.06572	0.00276017	0.0347979	-1.97888	-2.99326	0.0187138
MISP3	0.52532	0.969208	3.06134	0.00277183	0.0349204	-1.73463	2.99197	0.0187797
AL158214.2	-0.425991	0.536058	-3.06044	0.00279656	0.0352073	-1.72746	-2.98926	0.018934
RPSA	0.451635	6.48064	3.06038	0.00280115	0.0352232	-2.24527	2.98876	0.0189426
AC006946.2	0.334964	-0.105267	3.05741	0.00280174	0.0352232	-1.69711	2.98869	0.0189426
PITPNM1	0.257671	5.08304	3.05848	0.00280527	0.0352416	-2.18604	2.98831	0.0189525
SLC38A3	0.156228	6.22853	3.05885	0.00280931	0.0352416	-2.25678	2.98787	0.0189525
PSPH	0.378738	2.52035	3.05615	0.00281049	0.0352416	-1.92223	2.98774	0.0189525
SPATA21	-0.327407	2.97659	-3.05518	0.00281174	0.0352416	-1.93271	-2.9876	0.0189525
LINC01410	-0.526337	0.510039	-3.05566	0.00281409	0.0352416	-1.73064	-2.98735	0.0189525
AL022322.2	-0.406084	1.84939	-3.05666	0.00281877	0.0352416	-1.79476	-2.98684	0.0189525
MGST1	-0.536338	0.635303	-3.05473	0.00281928	0.0352416	-1.72993	-2.98678	0.0189525
AC012178.1	-0.560005	6.39001	-3.05906	0.00281944	0.0352416	-2.27782	-2.98677	0.0189525
ASF1A	0.217657	3.21402	3.05732	0.00282082	0.0352416	-1.97788	2.98662	0.0189525
FNBP4	-0.135186	7.30773	-3.05589	0.00283034	0.0353307	-2.32876	-2.98559	0.0190004
MKS1	0.177384	3.77562	3.05287	0.00283188	0.0353307	-2.06028	2.98542	0.0190004
ZFHX2	0.236608	4.25211	3.05506	0.00283858	0.0353899	-2.1089	2.9847	0.0190322
RPL15	0.44444	6.78516	3.05501	0.00284865	0.0354908	-2.27636	2.98361	0.0190865
LINC02631	-0.330591	5.40397	-3.05141	0.00285107	0.0354964	-2.23492	-2.98336	0.0190895
Z94721.3	0.381341	0.975097	3.05047	0.00285536	0.0355252	-1.77434	2.9829	0.019105
GRINA	0.339397	5.45887	3.05254	0.00286821	0.0356605	-2.2066	2.98152	0.0191777
OGFOD2	0.229587	2.23844	3.05124	0.00287538	0.0357058	-1.87141	2.98076	0.0192021
SURF6	0.233601	3.31896	3.04935	0.00287706	0.0357058	-2.00347	2.98058	0.0192021
DOCK4	-0.254936	7.17492	-3.04838	0.00287781	0.0357058	-2.34627	-2.9805	0.0192021
CIB1	0.382537	3.03519	3.05037	0.00288578	0.03578	-1.96943	2.97965	0.019242
MYO3B-AS1	-0.40428	5.15927	-3.05067	0.00288933	0.0357824	-2.19368	-2.97927	0.0192433
BRD9	0.282833	5.13639	3.04718	0.00289003	0.0357824	-2.20099	2.9792	0.0192433
RASSF8	-0.166915	5.78606	-3.04679	0.00289267	0.0357824	-2.27416	-2.97892	0.0192433
TMEM132C	1.32788	-0.394793	3.04674	0.00289442	0.0357824	-1.72099	2.97873	0.0192433
AC089999.1	-0.463768	-0.101194	-3.04581	0.00289742	0.0357824	-1.72148	-2.97842	0.0192433
SUMO3	0.372999	4.11322	3.04864	0.00289855	0.0357824	-2.10096	2.9783	0.0192433
RNASEH1-AS1	0.304089	2.80473	3.04531	0.00290183	0.0357824	-1.94986	2.97795	0.0192433
AF230666.1	-0.474574	-0.257258	-3.04863	0.00290307	0.0357824	-1.73272	-2.97782	0.0192433
AC004232.1	-0.578325	-0.577628	-3.04566	0.00290385	0.0357824	-1.7218	-2.97774	0.0192433
SEMA4F	0.178317	3.44325	3.04482	0.00290718	0.0357989	-2.07816	2.97739	0.0192522
UBA52	0.474476	5.3867	3.04804	0.00290959	0.0358041	-2.19725	2.97713	0.019255
HMGB1	0.147419	7.53834	3.04675	0.0029155	0.0358523	-2.36487	2.97651	0.0192809
SVOP	-0.268954	6.24947	-3.04482	0.00292334	0.0359241	-2.29428	-2.97569	0.0193195
LRRC17	-0.265442	3.61114	-3.04538	0.0029317	0.0360017	-2.03922	-2.97481	0.0193612
NLK	-0.232446	8.82437	-3.04336	0.00293485	0.0360017	-2.43176	-2.97448	0.0193612
AC120349.1	-0.483765	-0.136767	-3.04223	0.00293565	0.0360017	-1.73348	-2.9744	0.0193612
GALK1	0.447401	1.57246	3.04279	0.00293929	0.0360096	-1.80473	2.97402	0.0193655
ADNP	0.128417	7.34145	3.04317	0.00294169	0.0360096	-2.37804	2.97377	0.0193655
SIDT1	-0.618415	0.575362	-3.04024	0.00294366	0.0360096	-1.7414	-2.97356	0.0193655
INSL6	-0.409947	3.21321	-3.0404	0.00294429	0.0360096	-2.05073	-2.97349	0.0193655
YAP1	-0.915591	-0.302726	-3.03963	0.00295353	0.036098	-1.73419	-2.97253	0.019413
PEMT	0.223403	3.66575	3.04029	0.002958	0.0361011	-2.08412	2.97207	0.0194147
SEZ6L2	0.187942	5.9724	3.04074	0.00295874	0.0361011	-2.29177	2.97199	0.0194147
SLC15A4	-0.180991	5.48292	-3.04003	0.0029598	0.0361011	-2.25123	-2.97188	0.0194147
NSUN7	-0.494426	0.187388	-3.0372	0.00297119	0.0362155	-1.75139	-2.9707	0.0194762
GTPBP4	0.153565	4.40078	3.03785	0.00297376	0.0362223	-2.17298	2.97044	0.0194799
NUDT16	0.222748	2.86887	3.03936	0.00297726	0.0362404	-1.97911	2.97008	0.0194896
TET2-AS1	-0.419614	0.168681	-3.03793	0.00298298	0.0362796	-1.75464	-2.96949	0.0195107
FAM218A	0.360012	2.77111	3.03603	0.00298451	0.0362796	-2.02042	2.96933	0.0195107
AC023908.3	0.326825	0.447781	3.03547	0.00298758	0.0362924	-1.78695	2.96901	0.0195176
TMEM72-AS1	-0.458323	4.48707	-3.03609	0.00299084	0.0363076	-2.15892	-2.96868	0.0195257
RIMBP2	-0.246828	6.9635	-3.03429	0.00299776	0.0363132	-2.3895	-2.96797	0.0195287
AC127035.1	-0.334392	4.52209	-3.03579	0.00299917	0.0363132	-2.17337	-2.96782	0.0195287
AC073957.3	-0.462218	0.749914	-3.03671	0.00299949	0.0363132	-1.78804	-2.96779	0.0195287
MEX3A	0.391775	0.353162	3.03737	0.00300198	0.0363132	-1.76312	2.96753	0.0195287
PRMT6	0.365617	1.50198	3.03627	0.0030028	0.0363132	-1.84653	2.96745	0.0195287
MLXIPL	0.342603	2.22282	3.0337	0.00300341	0.0363132	-1.9402	2.96739	0.0195287
ARHGAP24	-0.687948	5.25923	-3.03298	0.00300984	0.0363467	-2.28543	-2.96673	0.0195468
NIPAL1	-0.331483	7.72554	-3.03652	0.00301022	0.0363467	-2.40174	-2.96669	0.0195468
LINC02021	0.543656	1.37165	3.03248	0.00301445	0.0363734	-1.8482	2.96626	0.0195611
AC016644.1	-0.426491	2.85814	-3.03627	0.0030197	0.0364124	-2.04185	-2.96573	0.0195821
GBF1	-0.157247	7.92857	-3.03339	0.003029	0.0364992	-2.42301	-2.96478	0.0196288
AL121992.1	0.321545	1.91496	3.03355	0.00303095	0.0364992	-1.88224	2.96458	0.0196288
GEMIN7	0.412374	1.13499	3.0319	0.0030423	0.0366113	-1.83374	2.96343	0.0196891
TESK1	0.281145	3.31242	3.02905	0.00304775	0.0366524	-2.11741	2.96288	0.0197112
CFAP410	0.339827	2.85943	3.02755	0.00306528	0.0368386	-2.01259	2.96111	0.0198113
AC013472.2	-0.350356	2.73612	-3.02946	0.00306836	0.03685	-1.99445	-2.96081	0.0198174
SH3GL1	0.184077	4.02959	3.02878	0.00307032	0.03685	-2.151	2.96061	0.0198174
GPCPD1	0.248183	6.1339	3.02709	0.00307761	0.0369129	-2.35382	2.95988	0.0198513
NETO1	1.35003	0.922487	3.02728	0.00308252	0.0369357	-1.841	2.95939	0.0198635
SLA2	-0.324655	2.15	-3.02611	0.00308362	0.0369357	-1.92794	-2.95928	0.0198635
TMEM249	0.327096	0.930261	3.02481	0.00309573	0.0370562	-1.83974	2.95807	0.0199283
AC008771.1	-0.234455	6.81585	-3.02686	0.00310036	0.0370869	-2.37638	-2.95761	0.0199448
AC008014.1	-0.328021	5.79837	-3.02364	0.00310704	0.0371422	-2.33931	-2.95694	0.0199746
SPARCL1	-1.45792	2.9477	-3.02186	0.00311377	0.0371893	-2.02447	-2.95628	0.0199999
SNHG9	0.578613	4.41708	3.02427	0.00311512	0.0371893	-2.20172	2.95614	0.0199999
SPRTN	-0.219179	4.46009	-3.02019	0.00313411	0.0373674	-2.22614	-2.95427	0.0200957
AC104365.1	-0.544685	5.05262	-3.0221	0.00313593	0.0373674	-2.23982	-2.95409	0.0200957
ERICH1	0.211661	5.03328	3.0201	0.00313627	0.0373674	-2.30841	2.95406	0.0200957
RORA-AS1	-0.315851	6.60929	-3.02203	0.00314759	0.0374587	-2.36792	-2.95294	0.0201448
ABHD17B	-0.236221	7.78252	-3.01941	0.00314815	0.0374587	-2.4609	-2.95289	0.0201448
ORC3	0.145999	7.03191	3.01865	0.00315017	0.0374587	-2.43604	2.95269	0.0201448
CLUH	0.270789	3.01636	3.01767	0.00315694	0.0375144	-2.1007	2.95203	0.0201747
LINC01309	-0.417997	1.22592	-3.01679	0.00316231	0.0375534	-1.86397	-2.9515	0.0201957
TENT5A	-0.393723	3.58946	-3.0197	0.00316729	0.0375878	-2.07558	-2.95102	0.0202142
AL139294.1	-0.353429	5.87909	-3.01784	0.00318071	0.0377223	-2.33757	-2.94971	0.0202865
ALG13-AS1	-0.400668	3.30507	-3.01625	0.00320888	0.0380313	-2.1331	-2.94699	0.0204527
ZBTB7C	-0.449679	5.30831	-3.01065	0.00323397	0.0382805	-2.32264	-2.94458	0.0205867
AC124852.1	-0.838587	1.62632	-3.00993	0.00323416	0.0382805	-1.9119	-2.94456	0.0205867
ZNF528	0.196327	4.73643	3.01045	0.00323753	0.0382952	-2.29646	2.94424	0.0205946
BNIP2	0.1642	5.51285	3.01148	0.00323988	0.0382979	-2.34746	2.94401	0.0205961
CD5	-0.710935	3.86088	-3.00859	0.00324349	0.0383104	-2.07782	-2.94367	0.0206028
TMPRSS11D	-0.723687	0.840871	-3.01162	0.00324723	0.0383104	-1.85372	-2.94331	0.0206028
AL136988.2	-0.373669	3.98757	-3.0095	0.0032487	0.0383104	-2.1641	-2.94317	0.0206028
AC022272.1	-0.481553	0.960535	-3.01117	0.00324946	0.0383104	-1.90338	-2.9431	0.0206028
PCF11	0.16875	5.83246	3.00955	0.0032563	0.0383626	-2.39038	2.94245	0.0206309
AC004784.1	-0.451675	2.47091	-3.0077	0.00325815	0.0383626	-2.02977	-2.94227	0.0206309
OGA	0.14091	7.77311	3.00915	0.00326453	0.0384126	-2.49259	2.94167	0.0206578
CETN2	0.328415	3.37563	3.00854	0.00327034	0.0384558	-2.08926	2.94111	0.020681
BCAR1	0.22496	3.11408	3.00531	0.00327479	0.0384831	-2.12626	2.94069	0.0206957
AC073195.1	0.39767	1.79355	3.00676	0.0032829	0.0385298	-1.95373	2.93993	0.0207208
ZFYVE19	0.219716	3.20089	3.00523	0.00328305	0.0385298	-2.12861	2.93991	0.0207208
MSN	-0.748066	-0.0337008	-3.00471	0.00329361	0.0386102	-1.82659	-2.93892	0.0207641
BACH1	-0.219989	5.93534	-3.00612	0.00329498	0.0386102	-2.39974	-2.93879	0.0207641
AC009884.1	-0.490242	0.420463	-3.00585	0.00329846	0.0386102	-1.85636	-2.93846	0.0207641
CNKSR2	-0.265059	9.23119	-3.00544	0.00329848	0.0386102	-2.54411	-2.93846	0.0207641
MAP7D3	0.451881	1.32618	3.00159	0.00331218	0.0387288	-1.92809	2.93717	0.0208279
SPESP1	0.211047	4.21666	3.00491	0.00331292	0.0387288	-2.23282	2.93711	0.0208279
WFDC11	-0.765913	0.520836	-3.00188	0.00331863	0.0387493	-1.84785	-2.93657	0.0208388
AP000892.1	-0.39767	6.75817	-3.00244	0.00331897	0.0387493	-2.41823	-2.93654	0.0208388
MAMDC4	0.348686	1.87728	3.00132	0.00333095	0.0388236	-2.0178	2.93542	0.0208788
AP003392.5	0.438123	1.30387	3.00125	0.00333118	0.0388236	-1.92461	2.9354	0.0208788
AC006581.1	-0.468298	-0.196075	-3.00325	0.0033318	0.0388236	-1.83359	-2.93534	0.0208788
CPE	-0.2147	8.86454	-3.00071	0.00333908	0.0388832	-2.54791	-2.93467	0.0209108
CALD1	-1.55186	1.91316	-2.99899	0.00335567	0.0390504	-1.97127	-2.93313	0.0210008
RPS27A	0.447767	7.55495	3.001	0.00335777	0.0390504	-2.46063	2.93293	0.0210008
SH3YL1	0.216023	4.38092	2.99689	0.00336664	0.0391258	-2.3146	2.93211	0.0210413
CACFD1	0.235245	2.69119	2.99897	0.00336868	0.0391258	-2.07319	2.93193	0.0210413
AC092567.1	-0.298703	3.94732	-3.00013	0.00337077	0.0391258	-2.21346	-2.93173	0.0210413
RBBP6	0.233342	6.73161	2.99674	0.00337501	0.0391442	-2.48246	2.93134	0.0210512
SRCIN1	0.463473	1.77813	2.99524	0.00337671	0.0391442	-2.00699	2.93119	0.0210512
JMJD4	0.242887	2.26686	2.99631	0.00338104	0.0391691	-2.01357	2.93079	0.0210646
SELENOH	0.271592	4.12545	2.99658	0.00338455	0.0391712	-2.23173	2.93047	0.0210658
AL161804.1	-0.380731	4.28381	-2.99416	0.00338751	0.0391712	-2.25144	-2.93019	0.0210658
RPL24	0.375555	6.87038	2.99785	0.00338957	0.0391712	-2.44024	2.93	0.0210658
AC093157.1	0.399256	3.14131	2.99407	0.00339182	0.0391712	-2.19981	2.9298	0.0210658
SAPCD1	0.365155	2.65524	2.99384	0.0033921	0.0391712	-2.12848	2.92977	0.0210658
RNASEH2B-AS1	-0.541175	0.325226	-2.99305	0.00340743	0.0392995	-1.86211	-2.92837	0.0211348
APBA3	0.212962	2.88414	2.99224	0.00340757	0.0392995	-2.12909	2.92836	0.0211348
PTPN9	-0.191347	6.24648	-2.99497	0.00341278	0.0393344	-2.43265	-2.92788	0.0211535
DUSP22	0.275853	2.71281	2.99095	0.00342128	0.0393843	-2.10603	2.92711	0.0211803
GNB3	0.359712	7.91206	2.99392	0.00342148	0.0393843	-2.53777	2.92709	0.0211803
STK16	0.279944	2.55794	2.99264	0.00343091	0.0394675	-2.04885	2.92624	0.0212251
MCRIP1	0.285561	4.4044	2.99139	0.00343569	0.0394935	-2.29788	2.9258	0.0212391
MCM8-AS1	0.339873	0.287074	2.98939	0.00343755	0.0394935	-1.88965	2.92563	0.0212391
TIGAR	0.222579	3.72302	2.99093	0.00344412	0.0395436	-2.21344	2.92504	0.021266
AL022328.1	0.414073	-0.21138	2.98807	0.00345126	0.0395764	-1.87347	2.9244	0.0212836
HCRTR1	-0.832451	-0.589722	-2.98792	0.00345218	0.0395764	-1.85879	-2.92431	0.0212836
GIPC2	-0.297843	4.06814	-2.9889	0.00345373	0.0395764	-2.2309	-2.92417	0.0212836
ADAMTS13	0.229152	2.1001	2.98789	0.00345576	0.0395764	-2.04108	2.92399	0.0212836
AP000676.5	-0.382936	4.9287	-2.98652	0.00346687	0.0396783	-2.37752	-2.92299	0.0213385
AC023590.1	-0.323797	6.54879	-2.99003	0.00347148	0.0397059	-2.46853	-2.92258	0.0213533
RPL26	0.435223	6.93897	2.98977	0.00347424	0.0397122	-2.45666	2.92233	0.0213567
SCAT2	-0.368834	3.15932	-2.98809	0.00348695	0.0398322	-2.15368	-2.92119	0.0214212
DIP2A-IT1	-0.507377	0.584649	-2.98639	0.00349128	0.0398564	-1.88739	-2.92081	0.0214342
WBP1	0.281958	4.47351	2.98691	0.00349784	0.039906	-2.30276	2.92022	0.0214609
AC007347.1	-0.394552	2.33767	-2.98689	0.00350631	0.039925	-2.11063	-2.91947	0.0214711
SURF1	0.339371	3.78586	2.98279	0.00350867	0.039925	-2.23872	2.91926	0.0214711
HDAC9	-0.238668	9.05574	-2.98329	0.00351001	0.039925	-2.6086	-2.91914	0.0214711
RPL7A	0.420531	6.7385	2.98618	0.00351257	0.039925	-2.45412	2.91891	0.0214711
LINC02197	-0.312485	7.67818	-2.98301	0.00351265	0.039925	-2.55665	-2.9189	0.0214711
PRDM6	-0.437345	1.18499	-2.98423	0.00351281	0.039925	-1.97294	-2.91889	0.0214711
C21orf58	0.185963	4.16077	2.9841	0.00351772	0.0399555	-2.28915	2.91845	0.0214876
ZNF91	0.124515	6.69002	2.98269	0.0035233	0.0399854	-2.52027	2.91796	0.0215036
POLDIP3	0.111743	4.54516	2.98229	0.00352479	0.0399854	-2.33611	2.91783	0.0215036
ASTN2-AS1	-0.355455	3.22042	-2.98372	0.00354119	0.0401251	-2.18522	-2.91638	0.0215787
AC006145.1	-0.72823	-0.112978	-2.98212	0.00354156	0.0401251	-1.90357	-2.91635	0.0215787
AC100763.1	-0.371581	4.80883	-2.98273	0.00354529	0.040142	-2.32539	-2.91602	0.0215878
APEH	0.344036	1.81668	2.97806	0.00356856	0.0403801	-2.02195	2.91398	0.0217159
NSUN5	0.228125	3.56063	2.97647	0.0035741	0.0403945	-2.24588	2.91349	0.0217236
CHCHD4	0.398789	1.44323	2.97808	0.00357432	0.0403945	-1.98306	2.91347	0.0217236
AFDN	0.149648	6.58538	2.97626	0.00357923	0.0403961	-2.53279	2.91304	0.0217245
ERI3	0.165533	5.59309	2.97673	0.00357962	0.0403961	-2.46163	2.91301	0.0217245
AC104982.2	-0.446456	0.955309	-2.97824	0.00358119	0.0403961	-1.93707	-2.91287	0.0217245
EXOG	-0.185499	5.65596	-2.97746	0.00359644	0.0405427	-2.43911	-2.91155	0.0218033
EVI2A	-0.438845	0.107685	-2.97766	0.00360027	0.0405605	-1.91375	-2.91121	0.0218129
AP005436.3	-0.434689	-0.217085	-2.977	0.00360521	0.0405907	-1.90334	-2.91079	0.0218291
EIF5A	0.524715	3.70784	2.97574	0.00361486	0.0406739	-2.21916	2.90995	0.0218739
BMI1	0.254292	4.37963	2.97557	0.00362171	0.0407115	-2.36498	2.90936	0.0218941
AC093866.1	-0.649799	-0.2057	-2.97206	0.00362764	0.0407115	-1.90588	-2.90885	0.0218941
RBM14	0.260261	5.39717	2.9725	0.00362796	0.0407115	-2.46575	2.90882	0.0218941
ZNF564	0.221671	4.1927	2.97361	0.00363004	0.0407115	-2.32141	2.90864	0.0218941
AF111167.2	0.28199	3.04176	2.97485	0.00363079	0.0407115	-2.19276	2.90858	0.0218941
ZNF599	0.254905	1.64112	2.97439	0.00363177	0.0407115	-2.03265	2.90849	0.0218941
PEX5	0.201912	3.80408	2.97014	0.00364265	0.0408081	-2.34585	2.90756	0.0219461
MDC1-AS1	-0.291713	3.88538	-2.9718	0.00364514	0.0408106	-2.24733	-2.90734	0.0219474
ZBTB20-AS1	-0.329413	3.65535	-2.97174	0.00366476	0.0410048	-2.25729	-2.90566	0.0220518
MIR3681HG	-0.477086	0.705072	-2.96775	0.00367029	0.0410411	-1.94977	-2.90519	0.0220714
AC012254.1	-0.48391	3.16555	-2.96749	0.00367768	0.0410927	-2.20413	-2.90456	0.0220991
C1orf146	-0.452661	0.293995	-2.9668	0.00367946	0.0410927	-1.93578	-2.90441	0.0220991
LRIG2	-0.147668	6.08986	-2.96987	0.00368194	0.0410948	-2.49704	-2.9042	0.0221002
TMPRSS11A	-0.672379	0.660271	-2.96686	0.00369947	0.0412422	-1.94402	-2.90271	0.0221795
RPL6	0.389743	6.82462	2.96855	0.00370158	0.0412422	-2.51852	2.90253	0.0221795
AL121987.2	-0.37658	2.51074	-2.96477	0.00370202	0.0412422	-2.13439	-2.9025	0.0221795
AC016571.1	-0.501448	0.365829	-2.96487	0.00371278	0.0413365	-1.94179	-2.90159	0.0222302
MYO3B	-0.231075	9.36307	-2.9658	0.00371744	0.0413515	-2.6554	-2.90119	0.0222383
RPN2	0.164616	5.90702	2.96324	0.00371909	0.0413515	-2.5269	2.90105	0.0222383
LINC01695	-0.921947	-0.554529	-2.96355	0.00372102	0.0413515	-1.92865	-2.90089	0.0222383
CEP126	0.168267	6.22388	2.96315	0.00372447	0.0413643	-2.55108	2.9006	0.0222452
SLC4A5	-0.163814	7.84613	-2.96462	0.0037415	0.0415279	-2.60847	-2.89917	0.0223332
KLHL28	-0.238843	6.86229	-2.96409	0.00374596	0.0415491	-2.56146	-2.8988	0.0223446
NUBP2	0.241987	3.9	2.96364	0.00374803	0.0415491	-2.30483	2.89862	0.0223446
RABL2A	0.157408	5.49042	2.96067	0.00375231	0.041571	-2.48999	2.89827	0.0223563
DZANK1	0.114039	6.00429	2.962	0.00375616	0.0415825	-2.52859	2.89795	0.0223625
AL022323.3	-0.394477	2.1901	-2.96293	0.00375984	0.0415825	-2.09954	-2.89764	0.0223625
REST	0.21647	5.28359	2.96072	0.00376028	0.0415825	-2.47186	2.8976	0.0223625
ZNF235	-0.145856	5.05662	-2.96122	0.00376422	0.0415971	-2.45078	-2.89727	0.0223704
AC124069.1	-0.330829	0.492639	-2.96002	0.00376622	0.0415971	-1.95223	-2.89711	0.0223704
STK11	0.167605	3.78863	2.96103	0.0037704	0.0416177	-2.31259	2.89676	0.0223814
RPE65	-0.660706	4.00653	-2.96253	0.00377952	0.0416577	-2.25681	-2.896	0.0224029
FAM169A	-0.200392	9.21544	-2.96015	0.00378219	0.0416577	-2.66731	-2.89578	0.0224029
ALDOA	0.525285	2.49001	2.95845	0.00378303	0.0416577	-2.11935	2.89571	0.0224029
HS1BP3	-0.219324	2.99312	-2.95863	0.00378445	0.0416577	-2.21662	-2.89559	0.0224029
NADK2	0.190807	4.36228	2.95735	0.00378575	0.0416577	-2.41939	2.89548	0.0224029
DIAPH2-AS1	-0.41831	4.51695	-2.95861	0.00378954	0.0416577	-2.35988	-2.89517	0.0224029
APBB3	0.274651	2.91729	2.95694	0.00379022	0.0416577	-2.23664	2.89511	0.0224029
BORCS8	0.291995	2.64791	2.95812	0.00379302	0.041663	-2.15553	2.89488	0.0224058
ZNF880	0.314853	3.78877	2.95599	0.00380103	0.0417256	-2.36742	2.89422	0.0224395
AL589740.1	0.445364	2.63979	2.95513	0.00381092	0.0418087	-2.22011	2.8934	0.0224842
AC011405.1	-0.259796	3.8063	-2.95824	0.00381634	0.0418427	-2.28727	-2.89296	0.0225024
SNCB	0.275006	5.41654	2.95496	0.00383287	0.0419767	-2.48211	2.8916	0.0225745
TTLL5	-0.167664	8.79348	-2.95584	0.00383323	0.0419767	-2.66736	-2.89157	0.0225745
AC011379.2	-0.85816	2.20843	-2.95151	0.00385253	0.0421624	-2.09449	-2.88999	0.0226744
USHBP1	-0.22992	3.85562	-2.95296	0.00385502	0.042164	-2.32251	-2.88979	0.0226752
DROSHA	0.131383	6.34319	2.95176	0.0038596	0.0421783	-2.57765	2.88941	0.0226829
AL353768.2	-0.375534	1.26756	-2.95108	0.00386101	0.0421783	-2.02098	-2.8893	0.0226829
AL139424.3	-0.399703	3.22341	-2.95262	0.00387078	0.0422593	-2.21238	-2.88851	0.0227265
AP000462.2	-0.46195	2.68812	-2.9535	0.00388007	0.0423351	-2.25855	-2.88775	0.0227672
AC015813.4	0.45367	0.5072	2.94893	0.00388346	0.0423464	-2.01699	2.88748	0.0227733
MLEC	0.15337	4.97925	2.94827	0.00389305	0.0424093	-2.50421	2.8867	0.0228072
ENPP6	-0.447595	-0.460819	-2.94795	0.00389394	0.0424093	-1.9593	-2.88663	0.0228072
SRP19	0.139588	6.05824	2.94758	0.00390088	0.0424465	-2.5801	2.88607	0.0228272
AL133297.2	-0.354681	3.72769	-2.94929	0.00390207	0.0424465	-2.30366	-2.88597	0.0228272
AL390957.1	-0.632089	4.78413	-2.94531	0.00393306	0.0427402	-2.41496	-2.88348	0.0229851
TRAF3IP2	-0.299223	3.74831	-2.94862	0.00393613	0.0427402	-2.3443	-2.88324	0.0229851
REX1BD	0.370166	4.55057	2.94661	0.00393619	0.0427402	-2.43397	2.88323	0.0229851
AL450384.2	-0.279764	7.46562	-2.94777	0.00394149	0.0427659	-2.6123	-2.88281	0.0229989
MAF1	0.318057	3.44545	2.94725	0.00394331	0.0427659	-2.26443	2.88266	0.0229989
AC243964.3	-0.480454	4.68777	-2.9432	0.00395085	0.0427975	-2.40248	-2.88206	0.0230159
UBA5	0.132592	4.69611	2.94382	0.00395098	0.0427975	-2.47961	2.88205	0.0230159
AC091271.1	0.361541	3.34535	2.94496	0.00395842	0.0428523	-2.27348	2.88146	0.0230454
AC073254.1	-0.493382	-0.00538638	-2.94176	0.00396688	0.0428773	-1.98189	-2.88078	0.0230588
ICE1	0.15327	6.18335	2.943	0.00396919	0.0428773	-2.59446	2.8806	0.0230588
GRK2	0.240082	3.05621	2.94213	0.00397132	0.0428773	-2.3211	2.88043	0.0230588
CYHR1	0.297286	4.52577	2.94283	0.00397233	0.0428773	-2.45812	2.88035	0.0230588
ANO10	0.224944	5.43972	2.94168	0.00397285	0.0428773	-2.54582	2.88031	0.0230588
DECR2	0.401004	0.625307	2.94185	0.00397604	0.0428773	-2.02204	2.88006	0.0230588
BCL2L14	-0.365443	5.46814	-2.94329	0.0039774	0.0428773	-2.51544	-2.87995	0.0230588
SRPK2	-0.143284	8.66924	-2.94326	0.00398018	0.0428817	-2.69829	-2.87973	0.0230612
POLB	0.161607	3.91417	2.93992	0.00398882	0.042938	-2.39523	2.87904	0.0230915
SETD7	-0.226484	5.11036	-2.94186	0.00399018	0.042938	-2.49928	-2.87894	0.0230915
RAC3	0.415568	1.74356	2.94053	0.00399329	0.0429451	-2.11665	2.87869	0.0230953
WDR34	0.199524	3.48565	2.94006	0.00399561	0.0429451	-2.32537	2.87851	0.0230953
ELK4	0.183706	4.52165	2.94222	0.00399803	0.0429454	-2.4543	2.87832	0.0230955
MIB2	0.220864	4.18612	2.93796	0.0040126	0.0430558	-2.43704	2.87717	0.0231548
NR1H2	0.158666	4.65096	2.9406	0.00401378	0.0430558	-2.44602	2.87708	0.0231548
CLCN2	0.242992	1.57017	2.93768	0.00401548	0.0430558	-2.14843	2.87694	0.0231548
ZNF607	0.217588	3.16257	2.93914	0.00402357	0.0431169	-2.32855	2.87631	0.0231877
PCED1A	0.311502	3.55925	2.93491	0.00404895	0.0433631	-2.40825	2.87432	0.0233201
PARM1	-0.724801	1.06682	-2.94098	0.00405192	0.0433691	-2.03182	-2.87409	0.0233233
SLC15A5	-0.693109	1.70638	-2.93622	0.00405855	0.0434136	-2.10105	-2.87358	0.0233473
EML2	-0.186036	7.6217	-2.93675	0.00406091	0.0434136	-2.66248	-2.87339	0.0233473
AC109322.2	-0.48929	-0.398643	-2.93627	0.00406355	0.043416	-1.9934	-2.87319	0.0233486
ALKBH1	-0.200276	4.56768	-2.9341	0.0040662	0.0434186	-2.46883	-2.87298	0.0233499
LINC00266-1	-0.422478	3.18607	-2.93229	0.0040807	0.0435231	-2.33234	-2.87185	0.0234061
MRTFA-AS1	-0.337587	2.63584	-2.93546	0.00408082	0.0435231	-2.25117	-2.87185	0.0234061
AC005343.1	-0.471313	0.487263	-2.93368	0.00409637	0.0436365	-2.04915	-2.87064	0.0234671
PPARGC1B	-0.259999	6.35296	-2.93236	0.00409898	0.0436365	-2.61777	-2.87044	0.0234671
TBKBP1	0.382343	1.8018	2.93067	0.00410103	0.0436365	-2.18485	2.87028	0.0234671
CLDN9	0.441039	0.961848	2.9306	0.00410424	0.0436365	-2.09357	2.87004	0.0234671
ACAT1	-0.149384	5.23612	-2.93136	0.0041051	0.0436365	-2.53102	-2.86997	0.0234671
PANX2	0.4393	1.65275	2.93202	0.00410599	0.0436365	-2.13952	2.8699	0.0234671
AC092650.1	-0.329668	2.5787	-2.92957	0.0041171	0.0437287	-2.23611	-2.86905	0.0235167
HCFC1	0.2284	3.07931	2.92891	0.00412703	0.0437901	-2.34753	2.86829	0.0235497
CCDC196	-0.885824	2.58176	-2.92846	0.00412774	0.0437901	-2.17455	-2.86823	0.0235497
AC140725.1	-0.281136	3.273	-2.92984	0.00413769	0.04385	-2.34031	-2.86747	0.0235819
NAPA	0.141923	6.20589	2.92871	0.00413826	0.04385	-2.61672	2.86743	0.0235819
ZNF285	0.279163	2.20327	2.92812	0.0041482	0.0439294	-2.24996	2.86667	0.0236247
AL596451.1	-0.961927	1.47515	-2.92789	0.00415099	0.0439309	-2.08741	-2.86645	0.0236255
GMPPA	0.315227	1.40782	2.92639	0.00415322	0.0439309	-2.15185	2.86628	0.0236255
ATG4A	0.168905	3.88822	2.92697	0.00415624	0.043937	-2.44861	2.86605	0.0236288
TRAC	0.297856	5.27397	2.92839	0.00417162	0.0440737	-2.54665	2.86488	0.0237023
FAM98C	0.17329	2.57253	2.92522	0.00418715	0.0442119	-2.25158	2.86371	0.0237766
AC106779.1	0.351172	2.29158	2.92361	0.00419247	0.0442421	-2.23965	2.86331	0.0237928
CHRNE	-0.398667	5.43682	-2.92355	0.00420811	0.0443811	-2.55132	-2.86212	0.0238676
FRS2	-0.137178	6.85689	-2.92356	0.00421534	0.0444119	-2.67697	-2.86158	0.0238841
E4F1	-0.219754	3.81814	-2.92323	0.00421596	0.0444119	-2.39802	-2.86153	0.0238841
AC024267.4	-0.311379	2.7712	-2.92441	0.00421872	0.0444149	-2.27822	-2.86133	0.0238858
NOC4L	0.316533	1.69217	2.92139	0.00422797	0.0444863	-2.1614	2.86063	0.0239242
ABCA2	0.312037	2.57527	2.92013	0.00423154	0.0444979	-2.30101	2.86036	0.0239304
COBLL1	-0.141314	9.16912	-2.92177	0.00423734	0.0445329	-2.77502	-2.85993	0.0239492
TRIM8	0.236168	5.05421	2.92042	0.00425412	0.0446831	-2.54799	2.85868	0.02403
AC018462.1	-0.353885	4.88747	-2.9222	0.00425913	0.0446883	-2.49285	-2.8583	0.0240328
KLHDC10	-0.18538	6.7223	-2.9196	0.00425958	0.0446883	-2.67197	-2.85827	0.0240328
HIST1H4C	0.821721	5.38789	2.92037	0.00427238	0.0447965	-2.52199	2.85732	0.024091
MEOX2	-0.419635	3.04188	-2.91868	0.00427553	0.0448035	-2.30827	-2.85708	0.0240947
NAPG	0.136993	5.38117	2.91673	0.00428246	0.04485	-2.60005	2.85657	0.0241197
AC011997.1	-0.408182	1.6567	-2.91678	0.00429122	0.0449109	-2.15442	-2.85592	0.0241525
AC092436.3	-0.404376	2.79804	-2.91781	0.00429326	0.0449109	-2.31977	-2.85577	0.0241525
DLEU1	-0.229576	6.94781	-2.91813	0.00430244	0.0449808	-2.67415	-2.85509	0.0241901
SON	0.217726	7.81129	2.91542	0.00431042	0.045038	-2.7519	2.8545	0.0242208
AC092944.1	-0.218209	4.63472	-2.91302	0.00432503	0.0451458	-2.52372	-2.85343	0.0242788
INTU	0.218956	7.92187	2.9142	0.00432575	0.0451458	-2.7608	2.85338	0.0242788
EHMT2-AS1	-0.388429	2.64748	-2.91533	0.0043289	0.0451524	-2.27918	-2.85314	0.0242824
LINC00624	-0.358285	4.20918	-2.91437	0.00433885	0.04523	-2.48452	-2.85241	0.0243241
INTS9-AS1	-0.371688	0.845812	-2.91376	0.00434166	0.0452331	-2.0934	-2.85221	0.0243258
INE1	-0.452781	0.894374	-2.91354	0.00435242	0.0453191	-2.11206	-2.85142	0.024372
AC005740.3	-0.540145	1.53188	-2.91186	0.00435736	0.0453442	-2.17071	-2.85106	0.0243855
ARRDC3-AS1	0.266602	4.05184	2.91181	0.00436137	0.0453597	-2.47055	2.85077	0.0243938
EPHA5	-0.787152	1.32864	-2.91119	0.00437366	0.0454383	-2.14719	-2.84987	0.0244361
CRYBG1	-0.393729	3.42703	-2.90951	0.00437397	0.0454383	-2.3616	-2.84985	0.0244361
NUTM2G	-0.470354	1.62299	-2.90875	0.00438057	0.0454558	-2.1658	-2.84937	0.0244455
AL079338.1	-0.478302	0.87456	-2.91181	0.0043807	0.0454558	-2.10767	-2.84936	0.0244455
TPTE2	-0.697886	2.74345	-2.90789	0.00439316	0.0455588	-2.29546	-2.84846	0.0245009
SPINK8	-0.384652	1.9234	-2.90944	0.00439627	0.0455648	-2.18224	-2.84823	0.0245041
ANAPC4	0.174094	4.81786	2.90756	0.00440046	0.045582	-2.60675	2.84793	0.0245134
RPL23A	0.446312	6.31895	2.91037	0.00440363	0.0455886	-2.63679	2.8477	0.024517
CRYZL1	-0.123554	6.32227	-2.909	0.00440733	0.0456007	-2.67346	-2.84743	0.0245234
PPM1D	-0.180564	6.17951	-2.90953	0.00441201	0.0456229	-2.65991	-2.8471	0.0245354
AL117335.1	0.25006	5.42654	2.90762	0.00441756	0.045654	-2.61559	2.8467	0.0245521
IL1RAPL2	-0.527345	1.50833	-2.90832	0.0044283	0.0457387	-2.21193	-2.84592	0.0245977
AC005332.5	0.304548	1.58594	2.90631	0.00444125	0.0458462	-2.20997	2.84499	0.0246555
NEUROD1	0.352883	7.42459	2.9065	0.00444906	0.0459005	-2.75227	2.84443	0.0246847
KCNK7	0.419226	-0.518524	2.90374	0.00445429	0.0459281	-2.07227	2.84406	0.0246995
PHEX	-0.453339	0.927498	-2.90268	0.00445736	0.0459335	-2.11138	-2.84384	0.0247024
TAGAP	-0.520649	0.064449	-2.90208	0.00446475	0.0459833	-2.07153	-2.84331	0.0247292
AC093158.1	-0.434886	1.73493	-2.90342	0.00449083	0.0462255	-2.22057	-2.84145	0.0248595
MBTPS2	-0.188389	4.7146	-2.89905	0.00450576	0.046343	-2.57579	-2.8404	0.0249227
AL008727.1	0.388508	-0.3196	2.89965	0.00450739	0.046343	-2.09059	2.84028	0.0249227
BAIAP2-DT	0.274592	2.2988	2.90016	0.00451064	0.0463499	-2.3018	2.84005	0.0249264
HGS	0.163401	4.58832	2.89842	0.00451339	0.0463517	-2.58749	2.83986	0.0249273
ATG14	-0.170832	5.90069	-2.89835	0.00452735	0.0464681	-2.67052	-2.83887	0.0249899
SMIM5	0.421266	0.383954	2.89873	0.00452988	0.0464681	-2.12979	2.83869	0.0249899
ACKR2	0.371098	0.834261	2.89663	0.00454021	0.0465243	-2.13829	2.83797	0.0250201
MAMDC2	-0.471968	1.90472	-2.89889	0.00454053	0.0465243	-2.22425	-2.83794	0.0250201
PSMB4	0.413209	3.88123	2.89799	0.00454685	0.0465584	-2.47766	2.8375	0.0250385
AC027018.1	-0.348116	5.44444	-2.89899	0.00454903	0.0465584	-2.62334	-2.83735	0.0250385
HSD11B1L	0.279793	2.63162	2.89689	0.00455189	0.0465612	-2.31482	2.83715	0.02504
FREM1	-0.542836	-0.158451	-2.89598	0.00455547	0.0465713	-2.09357	-2.83689	0.0250454
APCDD1L-DT	-0.525099	2.20168	-2.89496	0.00456142	0.0465909	-2.25168	-2.83648	0.025056
AL162586.1	0.370197	1.29195	2.89531	0.00456256	0.0465909	-2.21119	2.8364	0.025056
BTG2	-1.4855	1.5536	-2.89461	0.0045673	0.0466118	-2.16625	-2.83607	0.0250672
IRAK1BP1	0.162474	6.73425	2.89555	0.00457183	0.0466118	-2.75936	2.83575	0.0250672
FBXL7	-0.593278	5.32948	-2.89452	0.00457281	0.0466118	-2.6501	-2.83568	0.0250672
ELAC2	0.208135	3.70726	2.89447	0.00457496	0.0466118	-2.5149	2.83553	0.0250672
KIAA0319	-0.504613	3.29576	-2.89364	0.00457855	0.0466137	-2.4428	-2.83528	0.0250682
DGKZ	0.239689	2.3572	2.89389	0.00458146	0.0466137	-2.30598	2.83508	0.0250682
AC132219.1	-0.451426	0.8176	-2.89595	0.00458292	0.0466137	-2.15816	-2.83498	0.0250682
MCM6	0.435277	0.908214	2.89293	0.00458734	0.0466323	-2.17976	2.83467	0.0250782
LINC01237	0.392069	2.49849	2.89251	0.00459416	0.0466753	-2.40997	2.83419	0.0251013
KMT2E-AS1	0.337545	4.14623	2.89453	0.00460018	0.0467101	-2.52676	2.83377	0.0251201
AC073046.3	-0.33218	3.20737	-2.89349	0.00461312	0.0468151	-2.42242	-2.83288	0.0251766
PI4K2A	-0.189047	4.46643	-2.89221	0.00461586	0.0468165	-2.54997	-2.83269	0.0251773
AP3D1	0.17166	5.63523	2.89332	0.00462088	0.0468222	-2.6712	2.83234	0.0251803
PDXDC1	-0.233221	7.09179	-2.89352	0.00462162	0.0468222	-2.74977	-2.83229	0.0251803
C9orf163	0.416649	0.579633	2.89062	0.00462661	0.0468338	-2.15253	2.83194	0.0251866
AC011466.1	0.322657	0.712046	2.89064	0.00462914	0.0468338	-2.16821	2.83177	0.0251866
RFC4	0.190464	3.52965	2.89164	0.00463057	0.0468338	-2.46501	2.83167	0.0251866
CDCA8	0.262012	1.72002	2.88926	0.00463849	0.0468876	-2.2565	2.83112	0.0252155
AC074124.1	-0.43523	1.06128	-2.89278	0.00464202	0.0468969	-2.24659	-2.83088	0.0252205
AC139720.1	-0.976837	1.23097	-2.89251	0.00465023	0.0469535	-2.18744	-2.83031	0.025251
IQCH-AS1	-0.230877	5.68985	-2.89174	0.0046574	0.0469798	-2.66659	-2.82982	0.0252651
IFI27L2	0.389086	4.84798	2.89109	0.00465805	0.0469798	-2.5949	2.82978	0.0252651
AC022400.2	-0.342136	1.74321	-2.88869	0.00466242	0.0469975	-2.23066	-2.82948	0.0252747
LINC02848	0.379819	2.36137	2.88673	0.00467929	0.0471412	-2.37231	2.82832	0.0253519
AL353697.1	-0.371027	2.33382	-2.88912	0.00468437	0.047166	-2.35029	-2.82797	0.0253652
AL352984.1	-0.465855	0.827043	-2.8859	0.00469334	0.0472298	-2.1732	-2.82736	0.0253996
XPO6	0.160726	6.56349	2.88633	0.00470935	0.0473399	-2.75646	2.82627	0.0254588
HORMAD2-AS1	-0.496163	-0.308706	-2.88512	0.00470954	0.0473399	-2.11542	-2.82626	0.0254588
SCN3A	-0.527967	3.9183	-2.88543	0.00471887	0.0474073	-2.44192	-2.82562	0.025495
CENPS	0.170173	3.78497	2.88504	0.0047259	0.0474514	-2.50573	2.82515	0.0255188
MRTFA	-0.174614	8.11827	-2.88384	0.00473312	0.0474974	-2.84428	-2.82466	0.0255435
RANGAP1	0.201859	4.74639	2.88388	0.00474865	0.0476067	-2.61666	2.82361	0.0256023
AC112722.1	-0.323592	4.09606	-2.88232	0.0047493	0.0476067	-2.54977	-2.82356	0.0256023
AC145207.5	0.3255	1.53858	2.88099	0.0047523	0.0476101	-2.2725	2.82336	0.0256041
CLDN18	-0.35752	2.87668	-2.88415	0.00475493	0.0476101	-2.44282	-2.82318	0.0256041
AP000462.1	-0.513641	9.90236	-2.882	0.00475936	0.0476187	-2.86845	-2.82289	0.0256087
ADCY3	-0.529179	0.935324	-2.88142	0.00476107	0.0476187	-2.17619	-2.82277	0.0256087
ZNF541	0.464545	1.00078	2.88057	0.00477256	0.0477071	-2.2005	2.822	0.0256562
BRI3BP	0.18522	4.45402	2.87888	0.00478849	0.0478143	-2.62191	2.82093	0.0257139
GPR82	-0.360837	2.40599	-2.87947	0.0047907	0.0478143	-2.31455	-2.82078	0.0257139
VWC2	-0.391138	7.71554	-2.88848	0.00479126	0.0478143	-2.79318	-2.82074	0.0257139
SSH2	-0.188298	8.07438	-2.88017	0.00480738	0.0478942	-2.84277	-2.81966	0.0257569
CCDC148-AS1	-0.388592	4.45801	-2.88001	0.00480766	0.0478942	-2.59052	-2.81965	0.0257569
PPFIBP2	-0.446127	4.19198	-2.87708	0.00480791	0.0478942	-2.61894	-2.81963	0.0257569
MAD1L1	0.173713	5.55082	2.87829	0.0048099	0.0478942	-2.721	2.8195	0.0257569
WDR90	0.218706	4.01638	2.87637	0.00482045	0.0479727	-2.58029	2.81879	0.0257991
RBMXL1	0.231234	2.95165	2.87872	0.00482392	0.0479806	-2.42509	2.81856	0.0258034
MOSPD3	0.20991	2.47787	2.87739	0.00483372	0.0480516	-2.33202	2.81791	0.0258415
LINC02298	0.383773	0.957895	2.87509	0.00483811	0.0480687	-2.22751	2.81762	0.0258507
WWC3-AS1	-0.62759	0.263217	-2.87431	0.00484744	0.0481349	-2.15015	-2.817	0.0258863
Z69666.1	-0.444833	0.504312	-2.87521	0.00485038	0.0481375	-2.1681	-2.81681	0.0258877
MUC20	0.371712	4.40285	2.87364	0.00485722	0.0481788	-2.64446	2.81635	0.0259099
PSMD13	0.148692	4.77085	2.87252	0.00487286	0.0482636	-2.6726	2.81532	0.0259555
SLC1A1	-0.953893	0.281858	-2.87226	0.00487593	0.0482636	-2.17127	-2.81512	0.0259555
FRK	-0.668171	-0.478683	-2.87224	0.00487627	0.0482636	-2.14529	-2.8151	0.0259555
AL080317.2	-0.219455	2.36968	-2.8726	0.00487671	0.0482636	-2.38675	-2.81507	0.0259555
LENG9	-0.401719	4.63154	-2.8755	0.00487925	0.0482636	-2.6465	-2.8149	0.0259555
PEG10	0.414298	3.42386	2.87408	0.00488185	0.0482636	-2.44903	2.81473	0.0259555
LINC01931	-0.699891	-0.530681	-2.87129	0.00488983	0.0483159	-2.14112	-2.8142	0.0259836
ZFP82	-0.200419	4.59732	-2.871	0.00489402	0.0483217	-2.65963	-2.81393	0.0259868
AC053513.1	-0.424619	6.63302	-2.87434	0.00489579	0.0483217	-2.77905	-2.81381	0.0259868
ZBTB8A	-0.233505	3.85177	-2.87477	0.00490831	0.0484188	-2.52541	-2.81299	0.026039
AC245060.5	0.528577	3.76016	2.87036	0.00491122	0.0484209	-2.62164	2.8128	0.0260401
SLK	0.159964	5.2522	2.86993	0.00491478	0.0484296	-2.73488	2.81257	0.0260448
FNTA	-0.110754	6.65086	-2.87189	0.00493016	0.0485546	-2.79378	-2.81156	0.026112
HMGCS1	-0.229274	5.15625	-2.86799	0.00493858	0.0486109	-2.70585	-2.81101	0.0261423
AC128687.3	-0.328434	2.28797	-2.86798	0.00494557	0.048653	-2.3488	-2.81056	0.0261649
NTN4	-0.747181	0.105182	-2.86718	0.00494957	0.0486658	-2.17028	-2.8103	0.0261718
FBXO34	-0.168247	7.04963	-2.86835	0.00495844	0.0487013	-2.83401	-2.80972	0.0261909
PRMT1	0.237244	6.02363	2.8692	0.00496049	0.0487013	-2.75719	2.80959	0.0261909
CKS1B	0.484167	0.335551	2.86775	0.00496129	0.0487013	-2.17711	2.80954	0.0261909
BRD2	0.193296	4.901	2.86764	0.0049795	0.0488364	-2.68107	2.80836	0.0262636
MKNK2	0.214117	4.76212	2.86802	0.00498049	0.0488364	-2.63961	2.80829	0.0262636
OIP5-AS1	0.184929	6.47241	2.86724	0.00499292	0.0489317	-2.80003	2.80749	0.0263148
AC107375.1	0.262819	2.61588	2.86351	0.00500627	0.0490358	-2.42669	2.80663	0.0263708
AC048382.6	0.361542	-0.0878314	2.86323	0.00501213	0.0490665	-2.18108	2.80625	0.0263873
GIT1	0.195259	3.1642	2.86126	0.00504591	0.0493704	-2.51624	2.80409	0.0265507
FASTK	0.300765	4.22642	2.8601	0.00506667	0.0495465	-2.62059	2.80276	0.0266455
AC110296.1	-0.421556	6.08106	-2.86026	0.00508503	0.0496952	-2.77832	-2.8016	0.0267254
WDR91	0.190125	2.17335	2.85782	0.00508739	0.0496952	-2.4171	2.80145	0.0267254
ACSBG2	-0.378241	0.632097	-2.85772	0.0050963	0.0497553	-2.21573	-2.80088	0.0267577
DHDDS	-0.192603	6.67998	-2.85846	0.00511114	0.0498701	-2.82463	-2.79994	0.0268195
AC016722.2	-0.474436	0.815448	-2.85699	0.00511501	0.0498701	-2.21815	-2.7997	0.0268195
AC092343.1	-0.413209	2.61697	-2.85906	0.00511638	0.0498701	-2.37879	-2.79961	0.0268195
USP7	0.139566	5.77044	2.85573	0.00512147	0.0498845	-2.80737	2.79929	0.0268272
AC060765.2	-0.572754	0.461608	-2.85662	0.00512339	0.0498845	-2.23754	-2.79917	0.0268272
ORMDL3	0.302907	2.37446	2.85625	0.00513698	0.0499897	-2.4045	2.79832	0.0268838
DNHD1	-0.204236	6.46172	-2.85604	0.0051523	0.0501117	-2.82374	-2.79735	0.0269494
ZBTB20-AS5	-0.327047	6.15936	-2.85628	0.00516097	0.050169	-2.78174	-2.79681	0.0269802
CRB1	-0.165955	8.40165	-2.85548	0.00517256	0.0502372	-2.92539	-2.79609	0.0270169
TUSC2	0.363081	3.50242	2.85503	0.00517357	0.0502372	-2.52995	2.79602	0.0270169
CDC42SE2	-0.147344	5.08618	-2.85303	0.00518167	0.0502887	-2.72894	-2.79552	0.0270446
PRSS48	-0.3759	4.236	-2.85342	0.00520122	0.0504513	-2.64755	-2.7943	0.027132
CCDC153	0.407632	0.150123	2.84971	0.00520963	0.0505056	-2.22902	2.79378	0.0271613
ABHD18	-0.140435	6.8888	-2.85121	0.00521629	0.050543	-2.86557	-2.79336	0.0271813
L3MBTL2	0.123304	3.63871	2.84729	0.00524865	0.0508292	-2.60098	2.79136	0.0273352
EPHA8	0.820864	1.57591	2.84567	0.00527163	0.0510243	-2.42597	2.78995	0.0274402
CBR3	-0.56669	-0.308092	-2.84633	0.00528193	0.0510965	-2.20513	-2.78932	0.027479
AC010761.3	-0.455936	0.430237	-2.84277	0.00531649	0.0513899	-2.24641	-2.7872	0.0276368
SELENON	0.229126	2.4768	2.84269	0.00531797	0.0513899	-2.47459	2.78711	0.0276368
CREB3L4	0.332088	2.447	2.8426	0.00533078	0.051486	-2.43683	2.78633	0.0276885
AL713851.1	-0.60136	0.18472	-2.84161	0.00533459	0.0514952	-2.24446	-2.7861	0.0276935
BIN3	0.191246	5.05752	2.84121	0.0053438	0.0515385	-2.77938	2.78554	0.0277167
SDR39U1	0.278048	4.75402	2.84338	0.0053448	0.0515385	-2.72749	2.78548	0.0277167
GNAO1	0.429241	3.90705	2.84066	0.00535227	0.0515829	-2.62403	2.78503	0.0277406
ZMAT3	-0.164048	4.55877	-2.84033	0.00535778	0.0516084	-2.73046	-2.7847	0.0277543
MCM5	0.297543	1.51003	2.83959	0.00536628	0.051625	-2.36192	2.78418	0.0277632
AC089998.4	-0.570082	-0.363911	-2.84063	0.00536691	0.051625	-2.21939	-2.78414	0.0277632
LINC01033	-0.365833	-0.0173931	-2.84053	0.00536811	0.051625	-2.23664	-2.78407	0.0277632
POLE3	0.247031	3.05405	2.84114	0.00538275	0.0517382	-2.51199	2.78319	0.0278241
IDH1-AS1	0.56958	0.413987	2.83862	0.00539824	0.0518594	-2.2569	2.78226	0.0278893
GALNT14	-0.676032	2.86507	-2.83656	0.00541479	0.0519907	-2.54299	-2.78126	0.0279599
CNTRL	0.162053	6.76099	2.8368	0.00543139	0.0521223	-2.91813	2.78027	0.0280307
AC010201.3	-0.314249	4.41057	-2.83541	0.0054364	0.0521315	-2.68072	-2.77997	0.0280356
ENTPD3-AS1	0.194805	5.68066	2.83541	0.00543815	0.0521315	-2.82512	2.77986	0.0280356
AC092140.1	-0.357613	2.93364	-2.83429	0.00545058	0.0522229	-2.50383	-2.77912	0.0280848
RPS7	0.346798	7.36384	2.83733	0.00545669	0.0522536	-2.89378	2.77876	0.0281013
AL713852.1	-0.507605	0.120532	-2.83381	0.00546193	0.0522604	-2.24786	-2.77845	0.0281049
ATP6V1D	-0.13166	6.88627	-2.83329	0.00546568	0.0522604	-2.91752	-2.77822	0.0281049
WASF1	-0.182096	5.31832	-2.83436	0.00546885	0.0522604	-2.81474	-2.77804	0.0281049
CCDC9	0.175231	4.76768	2.83431	0.00546901	0.0522604	-2.74136	2.77803	0.0281049
GALNT17	1.16385	-0.0484101	2.83232	0.00548461	0.0523816	-2.25105	2.7771	0.0281701
AC002429.2	-0.344338	7.20279	-2.83507	0.005488	0.0523862	-2.90417	-2.7769	0.0281726
TEAD3	0.299476	5.18086	2.83197	0.0054996	0.0524691	-2.79434	2.77621	0.0282172
NME4	0.361293	1.67987	2.83174	0.00551163	0.0525264	-2.38849	2.7755	0.028248
KIZ	0.212658	6.50907	2.83072	0.00551429	0.0525264	-2.9217	2.77535	0.028248
PEX19	0.183681	3.13567	2.83263	0.00551436	0.0525264	-2.5621	2.77534	0.028248
DUSP26	0.201777	4.75156	2.83233	0.0055246	0.0525962	-2.75007	2.77474	0.0282855
AC104237.3	-0.426745	5.44853	-2.83122	0.00553158	0.0526348	-2.8069	-2.77433	0.0283063
SAMSN1	1.02354	1.10047	2.82897	0.00553504	0.0526399	-2.36783	2.77412	0.0283091
RCE1	0.308413	2.969	2.82983	0.00554371	0.0526945	-2.55006	2.77362	0.0283384
AL139095.4	-0.308532	3.84236	-2.83047	0.00555405	0.05273	-2.63077	-2.77301	0.0283575
AL158801.3	-0.385795	3.95839	-2.82776	0.00555584	0.05273	-2.66088	-2.7729	0.0283575
CHKB-DT	0.18248	4.71465	2.82921	0.00555623	0.05273	-2.76198	2.77288	0.0283575
ZNF805	0.171989	3.19983	2.82877	0.00558116	0.0529387	-2.58698	2.77142	0.0284697
AC006262.1	0.307552	2.38705	2.82678	0.00559663	0.0530575	-2.50866	2.77052	0.0285336
AL122003.2	-0.560803	-0.298408	-2.82414	0.00561972	0.0532483	-2.26433	-2.76918	0.0286362
AC023051.1	-0.364552	5.23545	-2.82662	0.00563177	0.0533344	-2.80586	-2.76848	0.0286826
AC084871.1	-0.459123	2.85042	-2.82442	0.00564165	0.0533591	-2.51871	-2.76791	0.0286958
TP53	0.28014	3.41053	2.82246	0.00564322	0.0533591	-2.62967	2.76782	0.0286958
AC005306.1	0.339003	2.09825	2.82255	0.00564326	0.0533591	-2.50684	2.76782	0.0286958
TIGD6	0.26572	2.04588	2.82419	0.00564804	0.0533762	-2.4474	2.76754	0.028705
ZNF655	0.129425	5.54392	2.82333	0.00565674	0.053412	-2.86938	2.76704	0.0287243
RPS4X	0.496271	6.3409	2.82467	0.00565776	0.053412	-2.85917	2.76698	0.0287243
EHD4-AS1	-0.502927	-0.539123	-2.82324	0.00566508	0.0534152	-2.26253	-2.76656	0.028726
PDCD11	0.178195	4.33898	2.82271	0.005666	0.0534152	-2.73603	2.76651	0.028726
AC023385.1	-0.405846	-0.0824338	-2.82378	0.005667	0.0534152	-2.28162	-2.76645	0.028726
AC011442.1	-0.423795	0.561342	-2.82307	0.00567483	0.053461	-2.30907	-2.766	0.0287506
ZMAT2	0.285551	3.38263	2.82117	0.00569475	0.0536206	-2.62838	2.76486	0.0288364
AC022540.1	-0.367656	2.56339	-2.82124	0.00571722	0.0537729	-2.56697	-2.76357	0.0289184
ADAM12	-0.360544	4.39542	-2.81878	0.00572145	0.0537729	-2.71164	-2.76333	0.0289184
ABTB2	0.490998	2.29382	2.81893	0.00572153	0.0537729	-2.47724	2.76333	0.0289184
GVQW2	0.372795	1.66617	2.81782	0.00572288	0.0537729	-2.42102	2.76325	0.0289184
DHX34	0.198904	4.61284	2.81776	0.00574514	0.053954	-2.78036	2.76198	0.0290157
POLR2I	0.521936	3.82469	2.81774	0.00576587	0.0541204	-2.66355	2.76081	0.0291052
PSG11	-0.649084	-0.463023	-2.81392	0.00578393	0.0542158	-2.2765	-2.75979	0.0291565
RBM5	0.15974	6.7598	2.81481	0.00578643	0.0542158	-2.96763	2.75964	0.0291565
PARD3	-0.218841	8.79382	-2.81413	0.00578669	0.0542158	-3.05646	-2.75963	0.0291565
SH3BP5-AS1	0.230223	4.23454	2.8156	0.00578808	0.0542158	-2.77784	2.75955	0.0291565
AC100830.1	-0.310455	3.16656	-2.8144	0.00582952	0.0545567	-2.64976	-2.75722	0.0293399
AC013726.1	-0.393241	1.26114	-2.81393	0.00583053	0.0545567	-2.37643	-2.75716	0.0293399
DNAL4	0.280196	2.65135	2.81336	0.0058375	0.0545736	-2.52527	2.75677	0.029349
VWC2L	-0.552481	1.56418	-2.81078	0.00583841	0.0545736	-2.44233	-2.75672	0.029349
ZNF540	-0.0976539	6.89987	-2.81326	0.00584549	0.0545937	-2.96005	-2.75632	0.0293598
H2AFY	0.151578	6.96521	2.81175	0.00584662	0.0545937	-2.98227	2.75626	0.0293598
RBM15B	0.285353	2.38082	2.81229	0.00585895	0.0546805	-2.49997	2.75557	0.0294064
SMIM13	-0.171108	5.18583	-2.80861	0.00587222	0.0547684	-2.88486	-2.75483	0.0294537
ANK1	-0.852175	2.67807	-2.80978	0.00587446	0.0547684	-2.5184	-2.75471	0.0294537
TNFAIP3	-0.225765	4.23803	-2.80989	0.00588251	0.0548152	-2.76358	-2.75426	0.0294789
AC090971.2	-0.357827	2.41494	-2.81008	0.00588614	0.0548206	-2.50851	-2.75406	0.0294818
CEP135	0.186637	5.45741	2.80681	0.00590326	0.0549516	-2.91898	2.75311	0.0295522
NDUFS7	0.267646	4.94007	2.80834	0.00591392	0.0550224	-2.83708	2.75252	0.0295903
ATE1	-0.135676	7.74685	-2.8085	0.00592776	0.0551227	-3.01928	-2.75175	0.0296442
RCAN3AS	-0.343403	3.30808	-2.80505	0.00593317	0.0551445	-2.65572	-2.75145	0.029656
SLC13A3	-0.374195	2.32164	-2.80563	0.00593836	0.0551643	-2.52224	-2.75117	0.0296666
SUGT1	0.195553	5.79702	2.80663	0.00595303	0.055272	-2.91853	2.75036	0.0297246
ANKRD36	0.22301	7.6015	2.80416	0.00596122	0.0553195	-3.04138	2.74991	0.0297501
MRI1	-0.251067	3.7044	-2.80468	0.00596551	0.0553308	-2.69986	-2.74967	0.0297562
ANKRD28	-0.14047	7.58773	-2.80366	0.005976	0.0553996	-3.03316	-2.7491	0.0297932
SNRPF	0.207369	4.48766	2.80458	0.00599338	0.0555321	-2.77705	2.74814	0.0298644
NCKAP5L	-0.209568	3.8368	-2.8012	0.00600657	0.0556208	-2.73663	-2.74742	0.0299121
BUD31	0.34511	3.44596	2.8029	0.00600914	0.0556208	-2.66592	2.74728	0.0299121
DNASE1	0.161317	4.99949	2.79923	0.00605732	0.056038	-2.8768	2.74466	0.0301365
ENO2	0.348833	8.84082	2.79965	0.00606362	0.0560617	-3.09043	2.74432	0.0301492
SMC4	0.167219	5.03363	2.79852	0.00606611	0.0560617	-2.89115	2.74419	0.0301492
LINC02427	-0.265742	1.56382	-2.79813	0.00607085	0.0560767	-2.46824	-2.74393	0.0301573
TOR2A	0.352585	2.17275	2.79881	0.00607803	0.0561142	-2.51476	2.74354	0.0301775
EIF4E	-0.106747	6.40927	-2.79891	0.00608235	0.0561254	-2.97191	-2.74331	0.0301835
GMFG	0.441478	0.596767	2.79829	0.00608954	0.0561629	-2.36085	2.74292	0.0302037
UBAC2-AS1	0.376577	0.333384	2.79534	0.00610212	0.0562501	-2.35571	2.74224	0.0302505
DNAJC4	0.318716	2.74184	2.79656	0.00610971	0.0562645	-2.58276	2.74183	0.0302583
MT3	0.702147	2.89362	2.79663	0.00610993	0.0562645	-2.58921	2.74182	0.0302583
OSER1-DT	0.221662	3.83717	2.79442	0.00613705	0.0564594	-2.75017	2.74037	0.0303631
CEP68	-0.180358	4.57711	-2.79329	0.00613837	0.0564594	-2.8569	-2.7403	0.0303631
SPRYD3	0.289038	3.36532	2.79382	0.00614051	0.0564594	-2.68708	2.74018	0.0303631
GPR37	-0.810623	2.02518	-2.79435	0.00614819	0.0564927	-2.46431	-2.73977	0.030381
TGFB1	-0.284323	5.22654	-2.79313	0.00615499	0.0564927	-2.87086	-2.73941	0.030381
AC004803.1	0.286793	0.86184	2.79361	0.00615592	0.0564927	-2.42364	2.73936	0.030381
AC007038.1	-0.221511	5.41036	-2.79319	0.00615668	0.0564927	-2.91461	-2.73932	0.030381
VPS9D1-AS1	-0.517685	-0.626345	-2.79265	0.00616259	0.056518	-2.32576	-2.739	0.0303946
AC139530.3	0.434846	0.0875131	2.79408	0.00616571	0.056518	-2.39078	2.73884	0.0303946
PDCD5	0.239257	4.49919	2.79365	0.00617555	0.0565667	-2.81714	2.73831	0.0304208
COBL	-0.319492	7.96473	-2.79283	0.00618561	0.0565667	-3.08009	-2.73778	0.0304208
RPS2	0.418892	6.48252	2.79384	0.00618574	0.0565667	-2.95547	2.73777	0.0304208
ZNF426	-0.180797	3.64126	-2.7915	0.00619011	0.0565667	-2.72274	-2.73754	0.0304208
SMC2-AS1	0.448461	1.12642	2.7928	0.00619146	0.0565667	-2.4162	2.73747	0.0304208
TMEM243	-0.393997	3.70541	-2.7907	0.00619392	0.0565667	-2.70939	-2.73733	0.0304208
UPK3BL2	-0.454269	-0.0922355	-2.79111	0.00619428	0.0565667	-2.35404	-2.73732	0.0304208
LINC01476	-0.372958	4.31382	-2.79451	0.00619617	0.0565667	-2.7493	-2.73722	0.0304208
TMEM42	0.268699	3.06875	2.78957	0.00620456	0.0565949	-2.68245	2.73677	0.030436
AC093297.2	0.313196	2.47991	2.7922	0.00620554	0.0565949	-2.61549	2.73672	0.030436
STX19	-0.439581	5.67306	-2.79056	0.00623997	0.0568801	-2.94123	-2.7349	0.0305893
MLLT6	0.145877	7.12239	2.78848	0.00624719	0.0568932	-3.04905	2.73452	0.0305964
SNTG2-AS1	-0.463745	2.67095	-2.79021	0.00624773	0.0568932	-2.53878	-2.73449	0.0305964
PTRH1	-0.258329	5.1738	-2.78922	0.00625903	0.0569673	-2.86452	-2.73389	0.0306363
SKIDA1	0.480716	1.05912	2.78719	0.0062642	0.0569855	-2.45109	2.73362	0.0306461
RASD1	-1.27157	1.49335	-2.7881	0.00627536	0.0570224	-2.42817	-2.73304	0.0306659
NALCN	-0.680008	3.8334	-2.78538	0.0062799	0.0570224	-2.74081	-2.7328	0.0306659
FAM3A	0.22023	3.60069	2.78609	0.00628084	0.0570224	-2.7296	2.73275	0.0306659
USH1C	0.907233	-0.442821	2.78626	0.00628092	0.0570224	-2.34112	2.73274	0.0306659
RNF166	0.25781	2.38275	2.78491	0.00628853	0.0570627	-2.6296	2.73234	0.0306875
MAPK8IP2	0.23056	3.60517	2.7838	0.00632104	0.0573288	-2.76928	2.73065	0.0308307
AC027288.3	-0.430717	7.55028	-2.78557	0.00632988	0.0573614	-3.03954	-2.73018	0.0308482
CACNA1H	0.592781	0.141824	2.78257	0.006331	0.0573614	-2.41933	2.73013	0.0308482
Z97055.2	0.352138	0.581673	2.78309	0.00633628	0.057376	-2.41749	2.72985	0.030856
UBOX5-AS1	-0.358234	4.22404	-2.78485	0.00633899	0.057376	-2.80019	-2.72971	0.030856
ATF4	0.27664	6.194	2.78412	0.00635419	0.0574847	-3.00408	2.72892	0.0309145
Z93930.2	0.250417	5.13071	2.78205	0.00637155	0.0576128	-2.92368	2.72802	0.0309834
CAMKV	0.969917	-0.22071	2.78026	0.00637647	0.0576283	-2.37199	2.72777	0.0309917
MIR646HG	-0.432704	8.03958	-2.77955	0.00639289	0.0577477	-3.12125	-2.72692	0.031056
MAZ	0.251013	4.47858	2.78027	0.0064146	0.0579148	-2.86107	2.7258	0.0311458
AC111152.2	-1.85683	-2.06978	-2.77815	0.00642937	0.058019	-2.37752	-2.72504	0.0312018
CLCN7	0.195206	4.20562	2.77671	0.00643858	0.058073	-2.87594	2.72457	0.0312309
AL022397.1	-0.482379	0.764672	-2.77865	0.00645414	0.0581496	-2.46583	-2.72377	0.0312721
AL691447.2	-0.700822	0.132885	-2.77699	0.00645538	0.0581496	-2.40118	-2.72371	0.0312721
[truncated: 16,005 more rows]

## Sheet: Cone age gender interaction DEG
	logFC	AveExpr	t	P.Value	adj.P.Val	B	z.std	qval
GNG12	2.22574	2.76526	7.21592	1.55186e-10	2.79382e-06	13.5013	6.40019	1.83617e-06
FGF12	-0.956287	6.83651	-6.69253	1.75581e-09	1.58049e-05	11.2892	-6.01892	1.03874e-05
KLRD1	-2.23934	4.65887	-6.3146	9.74841e-09	5.85002e-05	9.66061	-5.73505	3.8448e-05
GDPD5	0.388013	7.68184	6.17719	1.83093e-08	7.38944e-05	8.99231	5.62726	4.85655e-05
DLG4	0.343226	7.79194	6.15489	2.05228e-08	7.38944e-05	8.88591	5.60754	4.85655e-05
MED16	0.744259	2.935	6.07921	2.78453e-08	8.35498e-05	8.59933	5.55447	5.49113e-05
UNC5A	0.590147	3.31517	5.98061	4.30687e-08	0.000110767	8.24428	5.47778	7.2799e-05
SMIM2-AS1	1.11511	1.37766	5.8873	6.4821e-08	0.000145872	7.62567	5.40497	9.58709e-05
RXRA	0.636489	4.07196	5.71924	1.35782e-07	0.000271609	7.22433	5.27087	0.000178509
NRTN	0.638508	3.66996	5.56146	2.86812e-07	0.000516347	6.51756	5.13191	0.000339358
HMGCS1	-0.520946	5.03122	-5.3508	6.51903e-07	0.000989112	5.7699	-4.97517	0.000650072
ADAMTS13	0.657426	2.31524	5.35006	6.59298e-07	0.000989112	5.67332	4.97298	0.000650072
NUDT7	0.798178	1.26624	5.30836	7.76375e-07	0.00107516	5.33444	4.94121	0.000706625
JPX	-0.25459	8.25019	-5.28631	9.17952e-07	0.00111203	5.3054	-4.90846	0.000730856
MACROD1	0.440619	4.14903	5.2604	9.47035e-07	0.00111203	5.39769	4.90234	0.000730856
CLK3	0.473021	5.38931	5.25017	9.88305e-07	0.00111203	5.31335	4.89395	0.000730856
TRMT11	-0.39006	8.37699	-5.23144	1.07492e-06	0.00113834	5.0952	-4.8774	0.000748152
EVA1C	-0.917064	3.34178	-5.19282	1.27706e-06	0.00127727	5.12126	-4.84329	0.000839461
HIST1H2AC	1.10286	3.43452	5.16526	1.40831e-06	0.00133441	5.02564	4.82383	0.00087701
AC115837.2	-1.19375	2.25453	-5.08488	2.08259e-06	0.00187465	4.67216	-4.74524	0.00123207
RPL34-AS1	-0.449859	6.6698	-5.04226	2.37108e-06	0.00196342	4.44746	-4.71891	0.00129041
VEZT	-0.221009	7.2171	-5.03534	2.39933e-06	0.00196342	4.39041	-4.7165	0.00129041
CRELD1	0.453565	4.34372	5.01164	2.63953e-06	0.00198577	4.47819	4.69704	0.0013051
MOB2	0.439488	3.58866	5.00887	2.66946e-06	0.00198577	4.48858	4.69474	0.0013051
AC011632.1	-1.18285	1.29448	-5.00089	2.75755e-06	0.00198577	4.27853	-4.6881	0.0013051
CEMIP	-0.621702	5.34671	-4.99151	2.99883e-06	0.00207646	4.30018	-4.6709	0.00136471
NEDD9	-0.595597	5.7712	-4.95988	3.28231e-06	0.00211161	4.17387	-4.65231	0.00138781
PAXBP1	-0.242303	7.25891	-4.95858	3.4504e-06	0.00211161	4.08223	-4.64201	0.00138781
ADAP2	0.630303	3.3379	4.94843	3.46022e-06	0.00211161	4.25382	4.64142	0.00138781
TPD52L2	0.289927	4.35318	4.92542	3.74888e-06	0.00211161	4.11937	4.62484	0.00138781
HACD1	0.581837	3.41489	4.91826	3.85343e-06	0.00211161	4.15048	4.61913	0.00138781
ANKRD31	0.558448	2.00654	4.91182	3.95472e-06	0.00211161	4.08748	4.61375	0.00138781
AC015802.5	0.878704	2.05493	4.90987	3.98595e-06	0.00211161	4.09784	4.61211	0.00138781
ELFN1	0.461449	5.1555	4.91097	3.98793e-06	0.00211161	4.01678	4.61201	0.00138781
PIEZO1	0.539927	4.27261	4.88053	4.50938e-06	0.00228439	3.95145	4.58641	0.00150137
PI15	-1.13168	1.53515	-4.87598	4.56803e-06	0.00228439	3.88514	-4.58371	0.00150137
KLC3	1.339	0.0625968	4.85993	4.87385e-06	0.00235725	3.45409	4.57015	0.00154925
SHB	0.603802	4.37092	4.85479	4.97559e-06	0.00235725	3.83904	4.56581	0.00154925
FBXO15	0.445267	4.89214	4.82296	5.65217e-06	0.0025579	3.70497	4.539	0.00168112
TSPAN17	0.407778	3.98794	4.81529	5.85213e-06	0.0025579	3.72887	4.53166	0.00168112
CACFD1	0.496309	2.54402	4.81809	5.85225e-06	0.0025579	3.76276	4.53166	0.00168112
DNAJB2	0.384148	5.01167	4.81656	5.96744e-06	0.0025579	3.66855	4.52754	0.00168112
CYP3A4	-1.005	-0.0421664	-4.79932	6.20661e-06	0.00259855	3.1397	-4.51923	0.00170784
IRF3	0.45208	4.39561	4.78732	6.52626e-06	0.00267028	3.59164	4.50858	0.00175498
AC024560.5	-0.487677	4.13091	-4.78813	6.70266e-06	0.00268151	3.60215	-4.50292	0.00176237
AC055855.2	0.89668	0.378509	4.77147	6.93331e-06	0.00271349	3.30658	4.49573	0.00178338
TOB2	0.363043	6.49461	4.76735	7.10485e-06	0.00272146	3.41658	4.49052	0.00178862
RBPMS	-0.811749	4.59828	-4.71626	8.62635e-06	0.00317768	3.38286	-4.44902	0.00208846
LINC02334	-1.053	0.459044	-4.71563	8.64892e-06	0.00317768	3.07838	-4.44846	0.00208846
2023-03-01	0.752098	0.977698	4.70858	8.89169e-06	0.00320154	3.28484	4.44251	0.00210414
ARHGAP45	0.584567	5.16147	4.69985	9.24237e-06	0.00326256	3.21932	4.43418	0.00214424
AC010333.2	-0.632931	4.56794	-4.6807	9.92274e-06	0.0033783	3.23316	-4.41885	0.00222031
MTHFD1	-0.486493	4.46501	-4.68011	9.94556e-06	0.0033783	3.24897	-4.41835	0.00222031
SLC5A9	-0.775937	2.75637	-4.65317	1.11254e-05	0.00370559	3.13308	-4.39406	0.00243541
AP001505.1	0.641675	1.67163	4.65091	1.13473e-05	0.00370559	3.08528	4.38976	0.00243541
GRAMD2A	0.80191	-0.12536	4.64248	1.15266e-05	0.00370559	2.76968	4.38636	0.00243541
AC007336.2	1.1124	1.6164	4.61484	1.28412e-05	0.00403621	2.98259	4.36279	0.00265271
PRKCZ	0.355859	4.85699	4.61224	1.30034e-05	0.00403621	2.92046	4.36005	0.00265271
DAZAP1	0.296058	4.18096	4.6058	1.33012e-05	0.00405866	2.96707	4.35509	0.00266747
ETNK2	-1.27715	1.94717	-4.59873	1.37052e-05	0.00411225	2.8064	-4.34853	0.00270269
BTG3	-0.929901	0.735953	-4.54977	1.67163e-05	0.00471448	2.48938	-4.30476	0.00309849
NKAIN4	0.637979	1.8949	4.54884	1.69592e-05	0.00471448	2.67138	4.30157	0.00309849
ARMCX6	-0.643572	2.07138	-4.54556	1.70296e-05	0.00471448	2.68671	-4.30065	0.00309849
PAPPA	-1.08067	2.11562	-4.53936	1.72117e-05	0.00471448	2.73436	-4.2983	0.00309849
AC138649.1	0.421215	4.17225	4.54102	1.72658e-05	0.00471448	2.71003	4.2976	0.00309849
SMIM17	-0.691878	1.54223	-4.53782	1.74075e-05	0.00471448	2.6385	-4.29579	0.00309849
CCDC62	0.539171	2.87936	4.53481	1.75454e-05	0.00471448	2.7301	4.29404	0.00309849
NPSR1-AS1	-1.3996	5.6314	-4.53082	1.80662e-05	0.00477004	2.55979	-4.28754	0.003135
DSG2	-0.735946	1.37755	-4.53927	1.82821e-05	0.00477004	2.6167	-4.2849	0.003135
AL355334.2	1.07135	-0.347743	4.51326	1.90354e-05	0.00489564	2.16082	4.27591	0.00321755
AC091045.1	-0.691916	3.53314	-4.49411	2.05086e-05	0.00519367	2.60339	-4.25928	0.00341343
AC012629.2	1.04793	-1.13161	4.49597	2.07712e-05	0.00519367	2.19181	4.25644	0.00341343
AC008700.1	-0.663813	5.91347	-4.48401	2.1602e-05	0.00527617	2.40261	-4.24765	0.00346765
SH3BP1	0.900887	0.493342	4.47932	2.16873e-05	0.00527617	2.30811	4.24677	0.00346765
AC007279.2	-0.689757	2.98006	-4.4609	2.35746e-05	0.005543	2.46222	-4.22803	0.00364302
RNASET2	0.483459	2.44118	4.45666	2.37149e-05	0.005543	2.44539	4.2267	0.00364302
DDX11-AS1	0.867902	2.64096	4.45197	2.40819e-05	0.005543	2.47046	4.22324	0.00364302
POU6F2	0.951465	6.32095	4.4496	2.43184e-05	0.005543	2.25239	4.22103	0.00364302
DNAH9	0.578812	4.16919	4.44936	2.43236e-05	0.005543	2.4013	4.22099	0.00364302
UBXN6	0.398111	4.11169	4.43481	2.64823e-05	0.0059595	2.33937	4.20178	0.00391675
AL049779.4	-0.478699	4.95537	-4.42343	2.69085e-05	0.00598065	2.28009	-4.19817	0.00393065
INTS3	0.322289	4.5714	4.41741	2.74937e-05	0.00603621	2.24847	4.19329	0.00396717
LINC02343	-0.72699	9.88899	-4.40972	2.83795e-05	0.0060643	1.95567	-4.18609	0.00398563
SLC38A10	0.364344	3.59871	4.4071	2.85737e-05	0.0060643	2.29004	4.18455	0.00398563
E4F1	-0.398433	4.52868	-4.41129	2.86322e-05	0.0060643	2.23397	-4.18408	0.00398563
MIR2052HG	-0.887809	6.46843	-4.39981	2.94189e-05	0.0061551	2.0778	-4.17792	0.0040453
GRK2	0.463719	2.89235	4.39722	2.97447e-05	0.0061551	2.24565	4.17541	0.0040453
MSMO1	-0.70065	4.63084	-4.38282	3.1331e-05	0.00640968	2.17903	-4.16357	0.00421262
RIPK1	-0.425116	5.88849	-4.3809	3.17457e-05	0.00642156	2.03568	-4.16057	0.00422043
ARG1	-0.927629	1.35639	-4.36394	3.36516e-05	0.006667	2.07703	-4.14723	0.00438174
AC017083.1	0.548863	3.97176	4.3728	3.3802e-05	0.006667	2.14066	4.14621	0.00438174
TMEM150C	0.667743	4.59076	4.36067	3.40701e-05	0.006667	2.0593	4.1444	0.00438174
ACOX3	-0.418968	5.52049	-4.35173	3.55194e-05	0.00687588	1.9563	-4.13484	0.00451902
AGAP3	0.335102	4.0856	4.33559	3.74779e-05	0.00706364	1.98919	4.1225	0.00464243
AC103740.1	-0.597655	7.19392	-4.33518	3.75552e-05	0.00706364	1.81675	-4.12203	0.00464243
AC097468.2	0.489582	2.81237	4.33406	3.76665e-05	0.00706364	2.06189	4.12135	0.00464243
LY86-AS1	-1.59599	1.32741	-4.32567	3.90581e-05	0.00717734	1.88885	-4.11298	0.00471715
METTL2B	-0.253098	5.18907	-4.32635	3.90701e-05	0.00717734	1.89529	-4.11291	0.00471715
AC022634.2	-0.62012	4.02886	-4.32044	4.11181e-05	0.00747727	1.91889	-4.10111	0.00491427
NPIPB2	0.908946	2.95598	4.30847	4.18441e-05	0.0075332	1.96207	4.09705	0.00495103
MXD4	0.294234	4.90528	4.29787	4.32942e-05	0.00771708	1.81171	4.08916	0.00507188
LINC01797	-1.53545	-0.399183	-4.28796	4.47813e-05	0.00786975	1.42553	-4.08132	0.00517222
LINC02805	1.02646	-0.612306	4.29274	4.5025e-05	0.00786975	1.53077	4.08006	0.00517222
AC008459.1	1.2645	2.12289	4.27839	4.79762e-05	0.00830496	1.84559	4.06527	0.00545825
EPHB1	-0.607401	6.3926	-4.2613	4.94699e-05	0.00846349	1.64363	-4.05812	0.00556245
IRGQ	0.361789	2.80996	4.26184	4.98326e-05	0.00846349	1.78673	4.05641	0.00556245
C7orf50	0.228417	5.49896	4.25882	5.03024e-05	0.00846349	1.63295	4.05422	0.00556245
AC023154.1	-0.812342	0.449133	-4.23635	5.43566e-05	0.00906094	1.48258	-4.03606	0.00595511
UACA	0.541757	4.15147	4.22687	5.62282e-05	0.00928695	1.61277	4.0281	0.00610364
ZNF714	-0.373666	4.54078	-4.2101	5.98334e-05	0.00970777	1.553	-4.01347	0.00638022
USP7	0.221456	5.40226	4.2102	5.98546e-05	0.00970777	1.46333	4.01338	0.00638022
SLC1A1	-1.04924	4.41656	-4.1972	6.27835e-05	0.0100192	1.54506	-4.0021	0.00658493
C16orf95	-0.620704	3.64312	-4.20123	6.28881e-05	0.0100192	1.56571	-4.0017	0.00658493
AC012313.8	0.660453	1.18839	4.18978	6.47377e-05	0.0101698	1.51171	3.99484	0.00668389
KIAA0087	-0.866561	0.618098	-4.19927	6.4963e-05	0.0101698	1.49138	-3.99402	0.00668389
WIPF3	0.447422	4.42212	4.17977	6.69281e-05	0.0103871	1.43603	3.98695	0.00682671
STK25	0.328598	3.90149	4.17443	6.85266e-05	0.0105443	1.45322	3.98134	0.00693002
LINC00539	-0.462692	4.00741	-4.1677	7.03759e-05	0.0107371	1.4477	-3.97501	0.00705672
ALG14	-0.365306	4.45508	-4.15306	7.38458e-05	0.0111329	1.35383	-3.96354	0.00731688
AL359182.1	1.05503	-0.243254	4.1517	7.42072e-05	0.0111329	1.21172	3.96238	0.00731688
ERP27	-1.07975	-0.238152	-4.14988	7.52344e-05	0.0111527	1.1243	-3.95909	0.00732984
CLCN2	0.505392	1.7222	4.14672	7.55776e-05	0.0111527	1.43751	3.95801	0.00732984
AC106786.2	0.653022	0.890596	4.1425	7.67571e-05	0.0112346	1.37263	3.95431	0.0073837
A2M	-0.544057	4.36288	-4.1425	7.9548e-05	0.0115492	1.30791	-3.94576	0.00759047
AC006348.1	-0.989228	-0.367969	-4.12935	8.0578e-05	0.0116052	0.979392	-3.94267	0.00762724
LHFPL3-AS1	-0.375546	7.16821	-4.12283	8.30337e-05	0.0117754	1.05743	-3.93547	0.00773913
MFAP3L	0.359632	6.54607	4.11945	8.36766e-05	0.0117754	1.06397	3.93362	0.00773913
PAIP2B	0.331983	5.0428	4.13019	8.37223e-05	0.0117754	1.22434	3.93349	0.00773913
RBCK1	0.255951	4.30278	4.1115	8.59962e-05	0.0118318	1.2123	3.92704	0.00777616
LTB4R	0.564089	3.56971	4.11185	8.60494e-05	0.0118318	1.26756	3.9269	0.00777616
THOP1	0.275015	4.28976	4.11112	8.60945e-05	0.0118318	1.2213	3.92677	0.00777616
AC024560.1	1.39454	-0.142605	4.10812	8.71988e-05	0.0118927	1.00031	3.9237	0.00781623
AL589693.1	-1.21741	0.413531	-4.10826	8.85912e-05	0.0119918	1.12378	-3.91989	0.00788134
IFT27	0.275918	4.43546	4.08786	9.39715e-05	0.0125914	1.14117	3.90565	0.00827544
SMARCA1	-0.282894	5.40297	-4.08667	9.442e-05	0.0125914	1.04985	-3.9045	0.00827544
AC092966.1	1.41312	5.98688	4.06735	0.000100959	0.0133644	0.959307	3.88828	0.00878348
SCAT8	-0.525456	3.21972	-4.06616	0.000101927	0.0133941	1.13266	-3.88596	0.00880299
TBCD	0.364543	5.73402	4.05944	0.000104077	0.0135776	0.92398	3.88088	0.00892357
INTS6	0.281209	6.44954	4.05346	0.000106167	0.0137506	0.857629	3.87605	0.00903727
DDX59-AS1	0.788151	0.091744	4.04873	0.000108001	0.013888	0.960592	3.87188	0.00912758
BACH1	-0.347854	6.15059	-4.04442	0.000109699	0.013888	0.850403	-3.86807	0.00912758
ARHGEF33	0.32238	3.76291	4.04361	0.000110026	0.013888	1.01335	3.86735	0.00912758
AKR1B1	0.378006	3.13487	4.04633	0.000110314	0.013888	1.07536	3.86671	0.00912758
CNTFR	0.763662	1.62139	4.03892	0.000112248	0.0140334	1.06785	3.86247	0.00922314
AC067956.1	-1.14968	1.85097	-4.04016	0.000114087	0.0141426	1.02884	-3.8585	0.00929491
CCDC12	-0.243601	5.64142	-4.03013	0.00011592	0.0141426	0.853142	-3.8546	0.00929491
PHF21B	0.333252	6.77634	4.02824	0.000116322	0.0141426	0.747288	3.85375	0.00929491
TBX22	-0.922652	-0.327368	-4.02932	0.000116584	0.0141426	0.69074	-3.8532	0.00929491
COL6A6	-0.553524	5.54617	-4.02935	0.00011705	0.0141426	0.839955	-3.85222	0.00929491
AP001062.1	0.67491	1.53212	4.02588	0.000118652	0.0142406	1.0405	3.84889	0.00935934
PRCD	0.558499	7.20591	4.02024	0.000119784	0.0142813	0.696316	3.84657	0.00938605
LRRC3B	-0.85772	3.35049	-4.01389	0.000122466	0.0143907	0.976526	-3.84114	0.009458
KCNK12	-0.605252	4.34541	-4.01348	0.000122748	0.0143907	0.908383	-3.84057	0.009458
ACRBP	0.795536	0.107762	4.01089	0.000123824	0.0143907	0.77973	3.83843	0.009458
MSH6	-0.358675	5.11292	-4.01149	0.0001239	0.0143907	0.811359	-3.83828	0.009458
TENM2	-0.934024	7.63621	-4.00584	0.00012607	0.0143961	0.681969	-3.83401	0.00946155
PFKL	0.391734	5.89647	4.00553	0.000126204	0.0143961	0.744611	3.83375	0.00946155
SOX2-OT	0.454364	6.57556	4.00522	0.000126345	0.0143961	0.696931	3.83348	0.00946155
NINL	0.320806	6.48159	3.99692	0.000130734	0.0148026	0.661333	3.82507	0.00972868
UPP2	-0.410694	6.17761	-3.99501	0.000132758	0.0149378	0.690013	-3.82128	0.00981755
DCAF15	-0.445688	3.54786	-3.98806	0.000135543	0.0151552	0.879207	-3.81616	0.00996041
KCNH8	-2.17702	1.52529	-3.97965	0.000138477	0.0151552	0.869166	-3.81087	0.00996041
AC105001.1	-0.478564	3.048	-3.97979	0.000141265	0.0151552	0.853687	-3.80594	0.00996041
AC093382.1	0.596858	1.50881	3.97408	0.000141868	0.0151552	0.842202	3.80489	0.00996041
LRP4-AS1	-0.515957	5.91916	-3.97237	0.000142153	0.0151552	0.641238	-3.80439	0.00996041
ZNF366	-0.479094	7.34439	-3.97591	0.000142184	0.0151552	0.574298	-3.80434	0.00996041
AC010319.5	0.470212	3.26548	3.97231	0.000142237	0.0151552	0.821444	3.80424	0.00996041
PCDHA9	0.795078	-0.0639065	3.9719	0.000142373	0.0151552	0.671718	3.80401	0.00996041
LY86	-1.19747	0.727348	-3.97155	0.00014255	0.0151552	0.754769	-3.8037	0.00996041
AC026704.1	-0.469223	4.92381	-3.97366	0.000143108	0.0151552	0.716543	-3.80273	0.00996041
BTG3-AS1	-0.975056	-0.362068	-3.96833	0.000144268	0.0151886	0.533071	-3.80073	0.00998237
LINC01752	0.63199	0.144911	3.96464	0.000146528	0.0153301	0.663516	3.79688	0.0100754
AC015802.3	0.757557	1.51944	3.96275	0.000147315	0.0153301	0.823661	3.79555	0.0100754
AC068446.2	0.806773	1.73881	3.94819	0.000154943	0.0160313	0.799873	3.78301	0.0105362
AL133406.2	0.511071	1.76046	3.95137	0.000156759	0.0160907	0.787764	3.78011	0.0105752
UNC5D	1.8218	2.51175	3.94394	0.000157305	0.0160907	0.728904	3.77924	0.0105752
AL135923.2	1.80428	1.05215	3.9454	0.000158434	0.0161146	0.776502	3.77746	0.0105909
LINC00954	-1.04477	-0.363778	-3.9346	0.000162621	0.0164114	0.507319	-3.77096	0.0107861
LINC00222	0.497034	3.19327	3.9337	0.000163175	0.0164114	0.703949	3.77011	0.0107861
STRADB	-0.382149	8.67208	-3.9314	0.000164488	0.0164515	0.332241	-3.76811	0.0108124
AP001922.6	0.586264	1.56901	3.92219	0.000169946	0.0169035	0.705199	3.75995	0.0111095
PHLDB3	1.01196	0.132631	3.91472	0.000174509	0.017136	0.502364	3.75332	0.0112622
PPWD1	-0.22106	5.51695	-3.9189	0.000174723	0.017136	0.48963	-3.75301	0.0112622
MAP6	0.285169	8.34897	3.91371	0.000175138	0.017136	0.280614	3.75242	0.0112622
AC011824.2	-1.19179	3.72901	-3.91511	0.000176756	0.0172008	0.669816	-3.75011	0.0113048
MYCBP2-AS1	-0.321583	5.49085	-3.91607	0.000179114	0.0173365	0.469519	-3.74679	0.0113941
AC090518.1	-0.396316	4.45576	-3.9107	0.00018197	0.0173725	0.529822	-3.74281	0.0114177
SPATC1L	0.859445	0.931812	3.90536	0.000182597	0.0173725	0.609371	3.74195	0.0114177
AC011379.2	-1.02	2.21483	-3.90178	0.000182878	0.0173725	0.64243	-3.74157	0.0114177
BANP	0.39174	5.30573	3.90078	0.000183346	0.0173725	0.438223	3.74092	0.0114177
DMAC1	0.831452	3.8991	3.89679	0.000186142	0.0175451	0.535427	3.73712	0.0115311
CTBP2	0.220599	7.8373	3.89452	0.000188023	0.0176301	0.244504	3.73459	0.011587
TRAT1	-1.55931	3.30605	-3.89126	0.000189612	0.017687	0.623554	-3.73247	0.0116244
AC103808.1	-0.837783	1.6797	-3.89072	0.000191625	0.0177826	0.556508	-3.72981	0.0116872
SYNGR1	0.19075	5.27918	3.89279	0.00019297	0.0178156	0.427125	3.72805	0.0117089
MFSD4B	-0.243175	7.76453	-3.88675	0.000194794	0.0178364	0.24029	-3.72567	0.0117226
AC005393.1	0.58247	0.392052	3.88356	0.000195177	0.0178364	0.500314	3.72518	0.0117226
BTD	-0.213649	7.64332	-3.88036	0.000197073	0.0179187	0.22093	-3.72274	0.0117767
SLC36A4	-0.197573	5.87835	-3.8791	0.000198442	0.0179525	0.313285	-3.72099	0.0117989
EML2	-0.591968	5.35422	-3.87594	0.000200154	0.0179799	0.376127	-3.71882	0.0118169
ZNF721	-0.199741	6.786	-3.87624	0.000200742	0.0179799	0.256104	-3.71808	0.0118169
AC097662.1	-0.620725	8.51501	-3.87387	0.000201798	0.017985	0.163315	-3.71676	0.0118202
AL512625.3	-0.631612	3.25685	-3.87157	0.000204116	0.0180417	0.517339	-3.71387	0.0118575
KIF26B	-0.410492	4.65616	-3.87059	0.000204438	0.0180417	0.418853	-3.71347	0.0118575
RPARP-AS1	0.388306	3.65392	3.86789	0.00020994	0.0184368	0.486347	3.70675	0.0121172
ART4	-0.662524	4.75781	-3.86517	0.000211997	0.018453	0.39425	-3.70427	0.0121278
KCNMB2	-0.707829	3.49584	-3.86541	0.000212174	0.018453	0.464134	-3.70406	0.0121278
SLC25A28	0.299618	4.52796	3.85769	0.000214157	0.0185359	0.351713	3.7017	0.0121823
TENM3	-1.35156	3.50601	-3.83849	0.000228727	0.0196618	0.415464	-3.68497	0.0129223
ADAMTS16	-0.468429	2.69038	-3.83944	0.000229349	0.0196618	0.437894	-3.68428	0.0129223
AC007996.1	0.723293	-0.107406	3.83128	0.000234097	0.0199366	0.297827	3.67906	0.0131029
RPH3AL	0.604108	2.66835	3.83035	0.000235277	0.0199366	0.403516	3.67777	0.0131029
ANKRD20A3	0.677533	0.20848	3.82879	0.000236148	0.0199366	0.329444	3.67683	0.0131029
AL109811.1	-0.331221	3.96145	-3.82832	0.000236985	0.0199366	0.343625	-3.67593	0.0131029
FAM207A	0.435451	3.10661	3.82702	0.000238603	0.0199794	0.378598	3.67419	0.013131
TADA2B	0.322573	3.82513	3.82247	0.000241421	0.0200689	0.299207	3.67119	0.0131899
FAM153B	2.26261	0.575539	3.82577	0.000241902	0.0200689	0.402436	3.67068	0.0131899
AC023194.3	-0.573435	5.31203	-3.8175	0.000245645	0.020238	0.169053	-3.66676	0.013301
LINC01950	-1.22837	0.862561	-3.81825	0.000246188	0.020238	0.35145	-3.66619	0.013301
DLEU1	-0.296005	6.53776	-3.81289	0.000249848	0.0204455	0.0795607	-3.66242	0.0134374
AP003469.4	0.513793	2.34725	3.81517	0.000253185	0.0204571	0.358165	3.65902	0.013445
AC060780.1	0.251447	5.43404	3.80896	0.000253281	0.0204571	0.121218	3.65892	0.013445
SEMA7A	0.305673	5.37427	3.80535	0.000256275	0.0204571	0.117477	3.65591	0.013445
KIF24	-0.330499	2.9533	-3.80373	0.000257994	0.0204571	0.310405	-3.65419	0.013445
SLC25A34	0.741165	0.569406	3.8018	0.000259617	0.0204571	0.256863	3.65258	0.013445
POPDC3	0.933416	-0.536219	3.80011	0.000260986	0.0204571	0.161847	3.65123	0.013445
C3orf18	0.334003	2.59552	3.80385	0.000261127	0.0204571	0.320422	3.65109	0.013445
EWSAT1	0.743477	0.551548	3.79975	0.000261313	0.0204571	0.28913	3.65091	0.013445
LINC01572	0.420887	4.00135	3.80012	0.000261408	0.0204571	0.228064	3.65082	0.013445
ANKRD33B-AS1	0.773999	-0.60797	3.80537	0.000261543	0.0204571	0.147022	3.65068	0.013445
AL353699.1	-0.588569	1.09174	-3.80053	0.000263504	0.0204571	0.273714	-3.64876	0.013445
LMLN	0.211677	5.37531	3.79706	0.000263839	0.0204571	0.0866925	3.64844	0.013445
RMC1	-0.246423	5.35981	-3.79674	0.000264762	0.0204571	0.105871	-3.64754	0.013445
A1CF	-0.768396	3.16399	-3.79274	0.000268725	0.0205285	0.270122	-3.64372	0.0134919
LINC01798	-1.03972	4.78055	-3.79441	0.000268958	0.0205285	0.203733	-3.6435	0.0134919
EPN1	0.281067	4.43195	3.79135	0.000269106	0.0205285	0.167056	3.64336	0.0134919
DHX29	-0.160233	6.18369	-3.79451	0.000271136	0.0205396	0.0382163	-3.64142	0.0134992
AC004147.3	-0.937407	-0.117827	-3.79553	0.000271937	0.0205396	0.0505555	-3.64066	0.0134992
ZNF850	-0.385031	2.60673	-3.78988	0.000272675	0.0205396	0.282741	-3.63997	0.0134992
BIN1	0.333723	6.4319	3.78274	0.000277438	0.0207305	-0.0372827	3.6355	0.0136247
HMMR	0.691775	1.10021	3.78244	0.000277512	0.0207305	0.275736	3.63544	0.0136247
AC005291.2	-0.588361	1.93552	-3.78379	0.000279748	0.0208112	0.242052	-3.63337	0.0136777
GPD1	-0.660556	1.97691	-3.77617	0.000283629	0.0209901	0.260206	-3.62981	0.0137953
PAG1	-1.01923	2.13766	-3.77792	0.000286505	0.0209901	0.247711	-3.62721	0.0137953
Z97832.2	0.524646	1.80224	3.77348	0.000286669	0.0209901	0.253763	3.62706	0.0137953
NAALADL2-AS3	-0.581939	0.515628	-3.78038	0.000287734	0.0209901	0.208876	-3.6261	0.0137953
OMG	-0.443964	5.26584	-3.77622	0.000287983	0.0209901	0.0624427	-3.62588	0.0137953
AL354793.1	-0.991599	0.609976	-3.76802	0.00029211	0.0212051	0.147179	-3.6222	0.0139366
AC079336.5	-0.519017	3.57699	-3.7646	0.00029805	0.0215494	0.183208	-3.61699	0.0141629
LRIT2	-0.720611	1.94703	-3.76139	0.000306314	0.0220067	0.19102	-3.6099	0.0144635
AC010894.3	-0.371399	6.49749	-3.7541	0.000306821	0.0220067	-0.10163	-3.60947	0.0144635
CBFA2T3	0.654823	0.588597	3.75229	0.000308075	0.022009	0.126855	3.60841	0.0144649
HHATL	1.11866	1.06752	3.75239	0.000309501	0.0220235	0.125772	3.60721	0.0144745
SLC6A8	0.482048	5.35383	3.74696	0.00031397	0.0222054	-0.054064	3.60349	0.014594
AC097537.1	-1.22246	0.452434	-3.75055	0.000314524	0.0222054	0.0635326	-3.60303	0.014594
CRB1	-0.215671	8.29154	-3.74735	0.000316478	0.0222561	-0.248249	-3.60142	0.0146273
OR2AT4	-0.611946	3.34787	-3.74062	0.000320686	0.0224304	0.0783975	-3.59799	0.0147419
IQSEC3	0.696759	3.64199	3.74046	0.000321449	0.0224304	0.0924072	3.59737	0.0147419
AC092574.2	-0.503933	4.60774	-3.7374	0.000324341	0.0225448	-0.0059284	-3.59504	0.0148171
AL008721.2	0.827669	0.115252	3.73509	0.000326849	0.0226317	0.102329	3.59304	0.0148742
DAZAP2	-0.371862	3.51022	-3.73439	0.000329211	0.0226917	0.076027	-3.59116	0.0149137
GLIPR1L2	1.10689	1.12482	3.72985	0.0003328	0.0226917	0.122339	3.58833	0.0149137
FGF12-AS1	-0.463204	5.16251	-3.73001	0.000333013	0.0226917	-0.0918373	-3.58817	0.0149137
NR2F6	0.38128	4.82688	3.73638	0.000333758	0.0226917	-0.0334022	3.58758	0.0149137
NRG3	-0.343098	9.71326	-3.7291	0.000334017	0.0226917	-0.369273	-3.58738	0.0149137
AC078850.2	-0.801239	2.01069	-3.72655	0.000338229	0.0228915	0.105922	-3.58411	0.0150449
LEMD1-AS1	-1.30383	0.614287	-3.72011	0.000344396	0.0231654	0.000365984	-3.57939	0.0152249
BTG4	1.84948	2.23031	3.72088	0.00034485	0.0231654	0.0425332	3.57905	0.0152249
APCDD1L	-0.603265	3.04316	-3.7178	0.000346886	0.0232156	0.066047	-3.57751	0.0152579
F2RL2	-0.420145	3.56831	-3.70678	0.000360222	0.0239792	-0.0167495	-3.56763	0.0157598
SECISBP2	-0.229668	6.7672	-3.70772	0.000361151	0.0239792	-0.279533	-3.56696	0.0157598
OMA1	-0.300992	3.87189	-3.70428	0.000363661	0.0239792	-0.0705361	-3.56514	0.0157598
MGAT1	0.2259	5.57458	3.70409	0.00036468	0.0239792	-0.222636	3.56441	0.0157598
NOP9	0.4755	2.04008	3.70194	0.000366256	0.0239792	0.0273244	3.56328	0.0157598
TMEM44-AS1	-0.553259	3.48815	-3.70467	0.000366288	0.0239792	-0.00519472	-3.56325	0.0157598
SDSL	0.568416	1.44783	3.70068	0.000367942	0.0240002	0.0292607	3.56207	0.0157736
NUTM2A-AS1	-0.255873	6.913	-3.69804	0.000371167	0.0241232	-0.322188	-3.55978	0.0158544
C2orf73	0.427551	3.40444	3.69752	0.000379403	0.0244037	-0.0425774	3.55401	0.0160388
LINC01586	-1.18139	1.33183	-3.69104	0.000380154	0.0244037	-0.00909937	-3.55349	0.0160388
C1orf159	0.264192	4.2458	3.69126	0.000380886	0.0244037	-0.142695	3.55299	0.0160388
GSPT2	-0.692796	0.991194	-3.69047	0.000380905	0.0244037	-0.0450414	-3.55297	0.0160388
IDH1	-0.327298	3.89157	-3.68682	0.000385678	0.0246218	-0.110992	-3.54969	0.0161822
LMNA	0.234103	6.87276	3.68582	0.000390479	0.0248403	-0.35447	3.54644	0.0163257
EXPH5	0.442661	4.66896	3.68085	0.000393607	0.0249146	-0.223401	3.54433	0.0163746
SQLE	-0.539184	3.61373	-3.68025	0.000394416	0.0249146	-0.0913745	-3.54379	0.0163746
STK31	-0.757167	2.09547	-3.67726	0.00039852	0.0250859	-0.0358614	-3.54106	0.0164871
MLXIPL	0.460545	2.60969	3.67211	0.000406112	0.0254747	-0.0774234	3.53608	0.0167427
AC011369.1	-1.20609	2.75608	-3.66849	0.000410538	0.0256629	-0.0531782	-3.53322	0.0168664
POMGNT2	0.375621	2.30453	3.66702	0.000412601	0.0256722	-0.0778603	3.53189	0.0168725
IRS2	0.292774	6.12142	3.6664	0.000413539	0.0256722	-0.389821	3.53129	0.0168725
ADAMTSL4-AS1	-0.650865	2.61617	-3.66492	0.000417941	0.0258107	-0.0876067	-3.52849	0.0169635
CD83	0.940658	-0.173409	3.66275	0.000418638	0.0258107	-0.208931	3.52805	0.0169635
ARL13B	-0.177104	7.85872	-3.65594	0.00043465	0.0267065	-0.510451	-3.5181	0.0175522
AP003778.1	0.58917	0.894062	3.6455	0.000444143	0.027145	-0.161775	3.51236	0.0178404
GOLGA7B	0.637413	2.40575	3.64627	0.000444802	0.027145	-0.150141	3.51197	0.0178404
FSD2	-0.570357	2.8429	-3.64034	0.000452425	0.0275169	-0.166708	-3.50745	0.0180849
NARF	0.309251	5.37639	3.63709	0.000456731	0.0276853	-0.402236	3.50493	0.0181955
DSG2-AS1	-0.644669	1.0218	-3.63907	0.000460711	0.0278328	-0.171442	-3.50262	0.0182925
TCTEX1D2	0.24084	5.40304	3.63111	0.000466054	0.0279886	-0.435298	3.49954	0.0183949
NPAT	0.343104	4.70654	3.62921	0.000469331	0.0279886	-0.389795	3.49768	0.0183949
DMTN	0.335208	3.42323	3.6288	0.00046989	0.0279886	-0.257173	3.49736	0.0183949
PDIA3	0.317391	4.97981	3.62824	0.00047059	0.0279886	-0.405169	3.49696	0.0183949
SLC3A1	-0.468537	4.8323	-3.6242	0.000477435	0.0279886	-0.397799	-3.49311	0.0183949
DGCR6	0.613638	1.21473	3.62469	0.00047822	0.0279886	-0.202837	3.49267	0.0183949
PIAS4	0.309376	3.78348	3.62572	0.000478617	0.0279886	-0.311912	3.49245	0.0183949
AL008633.1	-0.786837	2.29334	-3.62329	0.000478623	0.0279886	-0.201866	-3.49244	0.0183949
SEMA5B	1.41393	0.215132	3.62321	0.000481179	0.0279886	-0.282153	3.49102	0.0183949
ALOX5	-0.778569	0.15153	-3.62107	0.000482126	0.0279886	-0.29835	-3.4905	0.0183949
SNTG2	-2.2843	0.943886	-3.61895	0.000486064	0.0279886	-0.271919	-3.48832	0.0183949
YJEFN3	0.610982	2.14881	3.6166	0.000489456	0.0279886	-0.227405	3.48646	0.0183949
EPB41L1	0.270679	8.61694	3.61538	0.000492325	0.0279886	-0.695628	3.4849	0.0183949
AL157893.2	-0.399759	3.23718	-3.6146	0.000492761	0.0279886	-0.271229	-3.48466	0.0183949
TLE1	0.288374	6.5762	3.61418	0.000493485	0.0279886	-0.579406	3.48427	0.0183949
DDHD2	-0.203144	5.4633	-3.61415	0.000493535	0.0279886	-0.480168	-3.48424	0.0183949
ARAP1	0.33959	4.83827	3.61381	0.00049408	0.0279886	-0.448237	3.48395	0.0183949
AL589740.1	0.553288	3.90915	3.61332	0.000494901	0.0279886	-0.342722	3.4835	0.0183949
KBTBD11-OT1	0.464467	2.62252	3.61364	0.000495439	0.0279886	-0.259631	3.48321	0.0183949
JHY	0.929869	-0.291121	3.61194	0.000499051	0.0279886	-0.28943	3.48127	0.0183949
AC069287.3	0.677449	1.09756	3.61072	0.000499261	0.0279886	-0.228652	3.48115	0.0183949
AL356234.2	-1.17135	1.49993	-3.60943	0.000501973	0.0279886	-0.247088	-3.4797	0.0183949
DLGAP1-AS1	-1.0559	-0.70108	-3.60904	0.000502454	0.0279886	-0.545194	-3.47944	0.0183949
AC016583.2	-0.724328	1.42482	-3.61276	0.000502878	0.0279886	-0.239868	-3.47922	0.0183949
TMEM187	0.647429	1.08359	3.60923	0.000504018	0.0279886	-0.269914	3.47861	0.0183949
AGL	0.452361	6.2796	3.61539	0.00050512	0.0279886	-0.563877	3.47803	0.0183949
ADPRM	-0.319416	4.22336	-3.60722	0.000505266	0.0279886	-0.394542	-3.47795	0.0183949
TMEM41B	-0.281242	6.12941	-3.60165	0.000514744	0.0283071	-0.564699	-3.47296	0.0186042
LYSMD4	0.3547	3.35071	3.60164	0.000515022	0.0283071	-0.354355	3.47282	0.0186042
VSTM2L	0.460223	2.952	3.60241	0.000515733	0.0283071	-0.305452	3.47245	0.0186042
TMEM106A	0.426757	2.78121	3.59857	0.000520093	0.0284597	-0.301235	3.47019	0.0187045
LINGO2	-1.27424	6.16252	-3.59755	0.000521875	0.0284707	-0.552572	-3.46927	0.0187117
DDAH2	0.446524	4.17328	3.59887	0.000527982	0.0287168	-0.384463	3.46614	0.0188735
ACOT2	-0.462	3.90355	-3.59063	0.000536721	0.0290069	-0.387374	-3.46173	0.0190641
MIR181A2HG	-0.268985	6.96088	-3.58988	0.000537157	0.0290069	-0.650531	-3.46151	0.0190641
PLXNA4	0.465803	7.13639	3.58785	0.000539606	0.0290069	-0.703403	3.46028	0.0190641
AC243829.1	0.840151	-0.483715	3.59107	0.000539796	0.0290069	-0.372954	3.46019	0.0190641
AC068051.1	-0.486882	6.89767	-3.59433	0.000541371	0.0290069	-0.643041	-3.4594	0.0190641
PPAT	-0.362421	3.00257	-3.58134	0.000551677	0.0294713	-0.368163	-3.45432	0.0193694
AP000842.2	-0.531105	2.86814	-3.57813	0.000557213	0.0296532	-0.359323	-3.45163	0.0194889
SLC26A5	-0.315048	4.41711	-3.57851	0.000559701	0.0296532	-0.490754	-3.45043	0.0194889
HMGCR	-0.405375	4.09698	-3.57653	0.000560022	0.0296532	-0.475899	-3.45027	0.0194889
ZFHX2	0.338005	4.48023	3.57564	0.000561698	0.0296547	-0.518678	3.44947	0.0194899
NQO2	0.372869	3.25004	3.57399	0.000564824	0.0297325	-0.410796	3.44797	0.019541
ABI3BP	-0.941053	5.5373	-3.56948	0.000573392	0.0300956	-0.551584	-3.4439	0.0197796
KDM3A	0.46302	6.3898	3.56665	0.000578952	0.0302695	-0.71625	3.44129	0.019894
LINC01562	0.451093	2.1507	3.56602	0.000580068	0.0302695	-0.376746	3.44077	0.019894
CCDC32	-0.332573	4.61885	-3.56427	0.000583693	0.0303706	-0.552595	-3.43908	0.0199604
MROH6	0.793897	-0.154776	3.56199	0.000587921	0.0304292	-0.424619	3.43713	0.019999
AC007952.4	1.02352	0.111711	3.56163	0.000588636	0.0304292	-0.412745	3.4368	0.019999
SLC26A6	0.493051	1.99546	3.56226	0.000591401	0.0304292	-0.374791	3.43553	0.019999
AC126118.1	0.753102	-0.0567869	3.56038	0.000591581	0.0304292	-0.468729	3.43545	0.019999
INPP5A	0.269235	4.35646	3.55609	0.000599651	0.0307564	-0.586414	3.43177	0.020214
AC005592.2	-0.776602	0.579237	-3.55463	0.00060255	0.0308173	-0.433793	-3.43046	0.020254
ARHGEF1	0.325779	3.91695	3.55198	0.000610324	0.0310724	-0.546102	3.42698	0.0204217
AC139887.2	0.394114	5.87889	3.55047	0.000610989	0.0310724	-0.733438	3.42669	0.0204217
AL596451.1	-0.57797	3.49973	-3.54277	0.000633824	0.0321429	-0.545963	-3.41671	0.0211252
AL356488.3	-0.711749	1.05073	-3.53609	0.000640928	0.0324118	-0.457607	-3.41368	0.021302
ITGA5	-0.638603	1.34332	-3.53582	0.000647667	0.0326609	-0.492674	-3.41082	0.0214657
ZNF451-AS1	-0.305207	6.43689	-3.53116	0.000653476	0.0327775	-0.798212	-3.40839	0.0215423
SLC43A2	0.561026	3.79821	3.53018	0.00065371	0.0327775	-0.585778	3.40829	0.0215423
ZNF318	0.226731	5.07121	3.52867	0.000656925	0.0327775	-0.741792	3.40695	0.0215423
CCNH	-0.186095	7.14512	-3.5286	0.000657261	0.0327775	-0.86894	-3.40681	0.0215423
ENTPD3-AS1	0.38384	5.31604	3.52635	0.000662925	0.0329686	-0.733616	3.40447	0.0216679
CCDC148-AS1	-0.371007	5.17395	-3.52798	0.000669461	0.0332019	-0.723139	-3.40179	0.0218212
EIF1B-AS1	0.259542	7.05916	3.51873	0.000681583	0.0337103	-0.886075	3.39688	0.0221553
ITGB1	0.221846	5.36819	3.51518	0.000687549	0.0337116	-0.792965	3.3945	0.0221562
PIP4K2C	-0.247011	5.18527	-3.51713	0.000687643	0.0337116	-0.747162	-3.39446	0.0221562
PSG8	-0.421668	4.25756	-3.5179	0.000687934	0.0337116	-0.672098	-3.39434	0.0221562
CCDC196	-0.556378	4.46518	-3.51614	0.000689529	0.0337116	-0.676959	-3.39371	0.0221562
SH3PXD2A	-0.653918	4.49905	-3.51254	0.000693003	0.0337116	-0.678198	-3.39233	0.0221562
SPARCL1	-1.47511	2.7296	-3.51209	0.000694045	0.0337116	-0.545213	-3.39192	0.0221562
AC126544.2	1.4871	-0.908928	3.51144	0.000695543	0.0337116	-0.698851	3.39133	0.0221562
SCN3A	-0.503998	8.48739	-3.51125	0.000697034	0.0337116	-0.949886	-3.39074	0.0221562
BRI3BP	0.286285	4.23299	3.51026	0.000699182	0.0337116	-0.681594	3.3899	0.0221562
AL109838.1	-0.467446	2.9516	-3.50974	0.000701606	0.0337116	-0.581301	-3.38895	0.0221562
LINC02151	-0.611427	3.52858	-3.50858	0.000702208	0.0337116	-0.623312	-3.38872	0.0221562
MESP2	-0.42093	4.28515	-3.5072	0.000705363	0.033773	-0.677364	-3.38749	0.0221966
AC012464.1	-0.38965	3.68588	-3.51131	0.000709056	0.0338598	-0.647162	-3.38605	0.0222536
IFT140	0.219061	6.05305	3.50457	0.000712737	0.0339455	-0.876321	3.38463	0.0223099
CRIP3	0.683836	-0.431861	3.50164	0.000718452	0.034019	-0.623604	3.38244	0.0223583
TTC23L	-0.414356	6.73477	-3.50098	0.000720065	0.034019	-0.918325	-3.38182	0.0223583
MIR3976HG	-0.479537	8.58738	-3.50028	0.000721676	0.034019	-1.05075	-3.38121	0.0223583
AL357375.1	-0.414131	4.98498	-3.50713	0.000721987	0.034019	-0.789933	-3.38109	0.0223583
C2orf88	-0.424232	6.08766	-3.49982	0.000723728	0.034019	-0.88354	-3.38043	0.0223583
TMPRSS11D	-0.657589	2.56495	-3.49806	0.000727003	0.034084	-0.592609	-3.37919	0.0224009
NKD1	0.452313	1.78303	3.49691	0.000729778	0.0340941	-0.559445	3.37814	0.0224076
TFDP1	0.21841	4.66956	3.49647	0.000731551	0.0340941	-0.776345	3.37747	0.0224076
ALDOC	0.610543	6.28191	3.50122	0.0007329	0.0340941	-0.836888	3.37697	0.0224076
BRSK2	0.282725	4.70343	3.48892	0.000749523	0.0347592	-0.798188	3.37079	0.0228447
LINC02660	-0.755381	4.00501	-3.48901	0.000754015	0.0347592	-0.736134	-3.36915	0.0228447
AC005695.2	-0.374208	4.43735	-3.48781	0.000755847	0.0347592	-0.757558	-3.36848	0.0228447
BTBD8	0.341047	6.09848	3.48622	0.000755939	0.0347592	-0.946638	3.36844	0.0228447
KCNJ6	-0.918457	2.27197	-3.50027	0.000756852	0.0347592	-0.559954	-3.36811	0.0228447
CBLL1	-0.287089	3.74337	-3.48184	0.000766991	0.0351352	-0.726465	-3.36444	0.0230919
MOGS	-0.479293	4.02499	-3.48098	0.000771375	0.0352464	-0.742147	-3.36287	0.0231649
LRRC20	0.498955	1.95335	3.47899	0.000774152	0.0352647	-0.611523	3.36187	0.023177
TTC21B-AS1	-0.470314	2.99442	-3.48122	0.000775695	0.0352647	-0.698217	-3.36132	0.023177
SGO1-AS1	-0.569459	2.04445	-3.4763	0.000781023	0.0353484	-0.626474	-3.35943	0.023232
AL160254.1	-1.17889	-0.696605	-3.4808	0.000781462	0.0353484	-0.795194	-3.35928	0.023232
LRRN2	0.834542	1.75377	3.4749	0.000784642	0.0353686	-0.621867	3.35816	0.0232453
AL442163.1	-1.29357	0.183058	-3.47443	0.000785839	0.0353686	-0.692681	-3.35774	0.0232453
FAM66C	0.877848	1.33281	3.46789	0.000803247	0.036062	-0.644176	3.35167	0.0237009
RBM14	0.377816	5.18222	3.46282	0.00081638	0.0364909	-0.945886	3.34718	0.0239829
MED19	-0.266568	4.50585	-3.46323	0.000818063	0.0364909	-0.832316	-3.34661	0.0239829
EBNA1BP2	-0.413868	3.92998	-3.46362	0.000821306	0.0364909	-0.795028	-3.34551	0.0239829
DRD3	-0.809453	3.29704	-3.4612	0.000822903	0.0364909	-0.724765	-3.34497	0.0239829
AC090735.1	-0.817441	-0.123854	-3.45996	0.000824086	0.0364909	-0.749373	-3.34458	0.0239829
ZFP90	0.205368	5.16572	3.45995	0.000824963	0.0364909	-0.934144	3.34428	0.0239829
LINC01309	-0.47685	1.78955	-3.46044	0.000830218	0.0365986	-0.670476	-3.34252	0.0240536
DIAPH2	-0.432545	8.28521	-3.45771	0.000831463	0.0365986	-1.1166	-3.3421	0.0240536
TTC5	-0.329345	3.69293	-3.45361	0.000841409	0.0367811	-0.814424	-3.3388	0.0241736
NKAIN2	-0.497503	4.51838	-3.4538	0.000841577	0.0367811	-0.890823	-3.33875	0.0241736
UNC119	0.331009	8.89603	3.45955	0.000841739	0.0367811	-1.16021	3.33869	0.0241736
AC092933.2	-2.24427	-0.829316	-3.45262	0.000846	0.0368778	-0.846966	-3.33729	0.0242371
AL078581.4	-0.356746	3.41846	-3.45269	0.000857807	0.0373022	-0.796592	-3.33343	0.024516
PLCH2	0.374003	5.31474	3.44479	0.000866052	0.03757	-0.999915	3.33077	0.024692
AL589645.1	-0.81564	3.94962	-3.44377	0.000868923	0.0375834	-0.845778	-3.32985	0.0247009
ZNF775	0.247419	3.57462	3.44417	0.000870537	0.0375834	-0.832721	3.32933	0.0247009
TEX264	0.281101	4.64462	3.44106	0.000885063	0.0381191	-0.919724	3.32472	0.0250529
AJ239328.1	0.589012	1.23705	3.43678	0.000889422	0.0381581	-0.73014	3.32335	0.0250786
FNBP4	-0.222707	7.66356	-3.43865	0.000890208	0.0381581	-1.16472	-3.32311	0.0250786
STARD7	-0.154624	6.51	-3.43238	0.000901864	0.0385659	-1.12764	-3.31948	0.0253466
AC087521.2	-0.501333	3.72462	-3.43479	0.000906057	0.0385877	-0.870736	-3.31818	0.0253609
ABHD15	0.602348	1.18485	3.43024	0.000908169	0.0385877	-0.737423	3.31753	0.0253609
SGO2	0.548511	2.76011	3.43088	0.000908804	0.0385877	-0.814568	3.31734	0.0253609
AGPAT3	0.19281	7.84277	3.42929	0.000914205	0.0387204	-1.21236	3.31568	0.0254481
ZGLP1	0.584533	0.446986	3.42753	0.000916231	0.0387204	-0.75556	3.31506	0.0254481
CAPN5	1.1096	0.228174	3.42653	0.000919204	0.0387551	-0.759936	3.31416	0.0254709
RCAN3AS	-0.279872	4.55761	-3.42413	0.000927175	0.0389998	-0.975805	-3.31174	0.0256318
NATD1	0.494944	1.17909	3.42335	0.000931939	0.0390899	-0.76007	3.31031	0.025691
NCK1-DT	0.249904	3.80354	3.42174	0.000933658	0.0390899	-0.905091	3.30979	0.025691
VEPH1	-0.477995	1.80207	-3.42675	0.000936619	0.0391229	-0.765027	-3.3089	0.0257127
Z94721.3	0.739519	-0.0538682	3.41698	0.000948594	0.0394629	-0.87187	3.30535	0.0259361
RNF14	-0.239104	4.08913	-3.41669	0.000949144	0.0394629	-0.961289	-3.30518	0.0259361
AL022345.4	0.847169	-0.954676	3.41324	0.000964094	0.03985	-1.0363	3.3008	0.0261905
LRP2	0.208869	7.91868	3.41136	0.000965723	0.03985	-1.28755	3.30033	0.0261905
PPARD	0.232983	4.66373	3.41372	0.000966789	0.03985	-1.02021	3.30002	0.0261905
HHLA3	0.460158	2.71657	3.41093	0.000967308	0.03985	-0.843215	3.29987	0.0261905
MFSD8	-0.232871	5.53072	-3.40935	0.000972046	0.0399537	-1.1195	-3.2985	0.0262587
UBE2J2	0.223262	4.51909	3.40766	0.000985856	0.0404231	-1.01624	3.29453	0.0265672
ATP2C2-AS1	0.43693	2.49158	3.40452	0.000987954	0.0404231	-0.874034	3.29393	0.0265672
CDH22	0.782108	5.31765	3.40107	0.00099851	0.040661	-1.13257	3.29095	0.0267236
AL160408.1	0.41291	3.10418	3.40073	0.0009996	0.040661	-0.927403	3.29064	0.0267236
AL450306.1	-0.605483	0.924995	-3.40078	0.00100055	0.040661	-0.847221	-3.29037	0.0267236
ERO1B	0.302544	4.382	3.39933	0.00100483	0.0406867	-1.04165	3.28917	0.0267405
TTC1	-0.148168	6.92747	-3.4006	0.0010057	0.0406867	-1.23119	-3.28893	0.0267405
AL139142.1	-0.661604	4.38095	-3.40079	0.00101215	0.0407104	-1.08118	-3.28713	0.026756
AC107884.1	0.360408	3.39972	3.39669	0.00101281	0.0407104	-0.99185	3.28694	0.026756
EFHD2	-0.606937	2.55139	-3.3966	0.00101307	0.0407104	-0.865896	-3.28687	0.026756
FNTA	-0.177572	6.62634	-3.39498	0.00101867	0.0408443	-1.23827	-3.28532	0.026844
MKNK2	0.328041	3.54613	3.39561	0.00102282	0.0409195	-0.941452	3.28417	0.0268935
PRPF19	0.318667	3.25765	3.39323	0.00103166	0.0411819	-0.928497	3.28175	0.0270659
EEF1G	0.476684	5.06864	3.39383	0.00104147	0.0414269	-1.07073	3.27908	0.0272269
SPDYE6	-0.772048	1.21524	-3.38666	0.00104619	0.0414269	-0.861998	-3.2778	0.0272269
C3orf67	0.477367	3.73067	3.38679	0.00104643	0.0414269	-1.02442	3.27774	0.0272269
ST6GALNAC1	0.894534	-0.29228	3.38685	0.00104701	0.0414269	-1.00777	3.27758	0.0272269
CXADR	-0.238684	5.56279	-3.3849	0.00105217	0.0414944	-1.17626	-3.27619	0.0272713
AL590822.1	0.591744	0.0485501	3.38458	0.00105332	0.0414944	-0.910913	3.27588	0.0272713
FAM153CP	1.89181	1.66856	3.38345	0.00105712	0.041502	-0.904829	3.27487	0.0272763
DEF8	0.269961	3.70076	3.38071	0.00106689	0.041502	-1.0341	3.27227	0.0272763
ZNF2	-0.309468	3.42689	-3.38142	0.00106909	0.041502	-0.991666	-3.27168	0.0272763
CA11	0.395721	4.04049	3.38026	0.00107004	0.041502	-1.03466	3.27143	0.0272763
SEMA6C	0.325403	3.90832	3.37961	0.00107078	0.041502	-1.05545	3.27124	0.0272763
MCRS1	-0.314414	3.56776	-3.38066	0.00107149	0.041502	-0.991818	-3.27105	0.0272763
CAMKK2	0.335868	2.19337	3.37851	0.00107552	0.041502	-0.913505	3.26999	0.0272763
ARL16	-0.344361	3.66148	-3.37825	0.00107571	0.041502	-0.993053	-3.26994	0.0272763
NAA60	0.225804	3.23236	3.37779	0.00107662	0.041502	-0.971822	3.2697	0.0272763
AC112719.2	-0.543501	1.22329	-3.37744	0.00107786	0.041502	-0.890497	-3.26937	0.0272763
ZNF790	-0.20183	5.62739	-3.37717	0.00108002	0.041502	-1.20144	-3.26881	0.0272763
BMP7	-0.964204	0.662923	-3.37628	0.00108372	0.041502	-0.954107	-3.26784	0.0272763
AP005899.1	-0.409484	4.69973	-3.37705	0.00108467	0.041502	-1.0874	-3.26759	0.0272763
NPTX1	0.285049	6.15432	3.37516	0.00108579	0.041502	-1.28227	3.2673	0.0272763
HHAT	0.383459	3.65503	3.3745	0.00108964	0.0415611	-1.07349	3.2663	0.0273151
APH1B	-0.279263	4.51848	-3.37302	0.0010933	0.0416124	-1.12714	-3.26535	0.0273488
CAMSAP1	0.172184	8.62993	3.37494	0.00109847	0.0417055	-1.41518	3.26401	0.02741
AL121821.2	-1.17701	1.29597	-3.37045	0.0011024	0.0417055	-0.908096	-3.263	0.02741
RBM12	0.321147	3.06265	3.37025	0.00110333	0.0417055	-1.0118	3.26276	0.02741
EEF2	0.393909	4.92136	3.37485	0.00110642	0.0417055	-1.1233	3.26197	0.02741
PROSER3	-0.290356	4.27864	-3.37355	0.00110733	0.0417055	-1.07276	-3.26173	0.02741
ADAM19	-0.194772	8.35362	-3.36701	0.00111774	0.0419323	-1.42125	-3.25908	0.0275591
POLR2F	0.253881	4.59644	3.36558	0.00111983	0.0419323	-1.14552	3.25855	0.0275591
LMO7-AS1	-0.449384	3.1591	-3.36925	0.00112034	0.0419323	-0.993287	-3.25842	0.0275591
RAB11FIP3	0.247261	5.67377	3.36507	0.00113006	0.0422086	-1.24623	3.25597	0.0277407
VPS53	0.180095	6.94381	3.36174	0.00113738	0.042394	-1.35503	3.25413	0.0278625
ABRAXAS2	-0.204966	4.24423	-3.361	0.00114104	0.0424424	-1.12622	-3.25322	0.0278944
PPP3CB	-0.150235	7.06906	-3.35985	0.00114529	0.0425126	-1.36274	-3.25217	0.0279405
GK-AS1	-0.350094	4.53011	-3.35889	0.00115384	0.0426658	-1.16153	-3.25005	0.0280412
LINC02694	-0.641191	1.41417	-3.3562	0.00115415	0.0426658	-0.942951	-3.24997	0.0280412
CFAP100	-0.457799	4.39688	-3.35481	0.00115932	0.0427691	-1.13493	-3.2487	0.0281091
AL355574.1	0.288513	5.29217	3.3508	0.00117441	0.043237	-1.28319	3.24502	0.0284166
HSPA1B	1.37124	2.7782	3.34928	0.00118012	0.043247	-0.996336	3.24364	0.0284231
LRRC74B	0.860866	1.54519	3.34914	0.00118122	0.043247	-0.970393	3.24338	0.0284231
AC107294.2	0.626867	0.981895	3.34846	0.00118318	0.043247	-0.961762	3.2429	0.0284231
SEPTIN4-AS1	-0.378413	3.5285	-3.34745	0.00118766	0.043247	-1.10955	-3.24183	0.0284231
RBM4	-0.234072	5.70658	-3.34708	0.00118875	0.043247	-1.30554	-3.24157	0.0284231
MALRD1	0.748217	0.402125	3.34814	0.00118909	0.043247	-0.998107	3.24148	0.0284231
AC008080.4	-0.724502	-0.0891289	-3.34897	0.00119205	0.043267	-1.03311	-3.24078	0.0284363
AC073111.4	0.488943	1.05056	3.34343	0.00120244	0.0435525	-0.97576	3.2383	0.0286239
WASHC1	0.441723	4.78219	3.34283	0.00120475	0.0435525	-1.24922	3.23775	0.0286239
MPRIP	0.205644	6.29152	3.34118	0.00121315	0.0436785	-1.38115	3.23577	0.0287067
AC105219.1	0.587511	-0.109279	3.33984	0.00121752	0.0436785	-1.04196	3.23474	0.0287067
AP3M1	-0.209523	5.07537	-3.34038	0.00121766	0.0436785	-1.26037	-3.23471	0.0287067
MAP2K2	0.277557	5.13798	3.34244	0.00121973	0.0436785	-1.25347	3.23423	0.0287067
NOP53	0.490088	4.13104	3.3443	0.00122037	0.0436785	-1.11941	3.23408	0.0287067
AC114811.2	0.328128	3.47608	3.33749	0.00122792	0.0438617	-1.11053	3.23231	0.0288271
ABL2	-0.258251	7.67306	-3.34066	0.00123476	0.0440186	-1.44747	-3.23073	0.0289303
LINC00276	-0.450767	3.95188	-3.33451	0.00123766	0.0440348	-1.19445	-3.23006	0.0289409
HIC2	0.339837	2.38201	3.33176	0.00124824	0.044222	-1.07514	3.22762	0.0290639
DHX16	-0.215039	5.45654	-3.33553	0.00124848	0.044222	-1.3048	-3.22757	0.0290639
SLC15A4	-0.226384	5.69513	-3.33303	0.0012524	0.044222	-1.32863	-3.22667	0.0290639
ZNF750	0.616161	0.477312	3.33175	0.00125481	0.044222	-1.04309	3.22612	0.0290639
HIST2H2BE	0.623454	2.27969	3.33121	0.0012552	0.044222	-1.04062	3.22603	0.0290639
ADAM21	-0.449868	1.82718	-3.33141	0.00126754	0.0444852	-1.03209	-3.22323	0.0292369
TBX1	1.19474	-0.654159	3.32583	0.00127211	0.0444852	-1.12672	3.2222	0.0292369
PLEC	0.323532	3.38222	3.32498	0.0012756	0.0444852	-1.16883	3.22141	0.0292369
AL359706.1	-0.385187	5.27918	-3.32695	0.00127616	0.0444852	-1.31005	-3.22129	0.0292369
KRCC1	0.40998	3.34396	3.32472	0.00127665	0.0444852	-1.16152	3.22118	0.0292369
USP9Y	0.913582	5.33842	3.32681	0.0012775	0.0444852	-1.03913	3.22099	0.0292369
CCDC38	-0.771573	0.762665	-3.32187	0.0012883	0.0447022	-1.05426	-3.21857	0.0293796
USF2	0.285532	3.8867	3.32343	0.00129058	0.0447022	-1.18789	3.21807	0.0293796
CPT1B	0.402935	3.40947	3.32048	0.00129406	0.0447022	-1.15748	3.21729	0.0293796
AL390195.1	-0.537612	0.436063	-3.3204	0.00129591	0.0447022	-1.07481	-3.21688	0.0293796
SFPQ	0.248104	6.8097	3.31997	0.00129615	0.0447022	-1.49551	3.21683	0.0293796
PIP5K1C	0.328433	5.66393	3.31827	0.00130458	0.0448778	-1.40773	3.21497	0.029495
CARMIL1	-1.89465	3.95737	-3.31719	0.0013077	0.0448778	-1.17888	-3.21429	0.029495
COPS7B	0.21234	4.39391	3.31747	0.00130872	0.0448778	-1.28152	3.21406	0.029495
CLDN15	0.372722	2.54236	3.31519	0.00131924	0.0451527	-1.10161	3.21176	0.0296756
PQBP1	-0.342946	4.22067	-3.31305	0.00133267	0.045459	-1.23155	-3.20885	0.0298769
TIMM22	-0.413405	3.28268	-3.31394	0.00133324	0.045459	-1.14702	-3.20873	0.0298769
LINC02096	-0.716251	5.91481	-3.3084	0.00134493	0.0457052	-1.41831	-3.20622	0.0300387
CD163	0.480322	1.13586	3.30828	0.00134554	0.0457052	-1.07864	3.20609	0.0300387
AC009139.1	0.380619	4.48921	3.30677	0.00135424	0.0457955	-1.31976	3.20423	0.0300981
ITPRIPL1	-1.02776	0.0801565	-3.30607	0.00135487	0.0457955	-1.12492	-3.2041	0.0300981
ZBTB46	0.203806	6.07488	3.30795	0.00135583	0.0457955	-1.45244	3.20389	0.0300981
AC127035.1	-0.33353	5.34219	-3.30385	0.00136471	0.0459909	-1.3847	-3.20201	0.0302265
LPCAT1	0.39508	7.24789	3.30344	0.00136672	0.0459909	-1.56505	3.20159	0.0302265
AL627309.1	0.640957	-0.106618	3.30083	0.00137764	0.0461825	-1.1274	3.1993	0.0303524
RNF187	0.494196	4.62524	3.30396	0.00138056	0.0461825	-1.28208	3.19869	0.0303524
HAR1A	0.637001	1.34446	3.30255	0.0013821	0.0461825	-1.10262	3.19836	0.0303524
DHCR24	-0.924338	1.22367	-3.29995	0.00138456	0.0461825	-1.10148	-3.19785	0.0303524
MTRR	-0.211307	5.21976	-3.30051	0.00138524	0.0461825	-1.41226	-3.19771	0.0303524
AP1B1	-0.193825	6.39589	-3.30093	0.00139002	0.0462003	-1.47959	-3.19671	0.0303641
AC093581.1	-0.392163	3.73922	-3.30268	0.00139429	0.0462003	-1.2835	-3.19583	0.0303641
AC023480.1	-0.460796	4.27143	-3.29953	0.00139465	0.0462003	-1.30439	-3.19576	0.0303641
POMZP3	-0.364337	4.28427	-3.29674	0.00139816	0.0462003	-1.28682	-3.19503	0.0303641
MATN2	-0.334714	7.20673	-3.29607	0.00139861	0.0462003	-1.58481	-3.19494	0.0303641
GPM6A	-0.744756	5.62353	-3.29444	0.00140587	0.0462762	-1.41272	-3.19344	0.030414
TMPRSS9	0.464683	2.13091	3.2944	0.00140605	0.0462762	-1.12152	3.19341	0.030414
ZNF132	-0.350138	2.193	-3.29444	0.00140937	0.0463011	-1.14018	-3.19272	0.0304304
CDC27	-0.173599	6.63134	-3.29397	0.00142167	0.0466199	-1.51998	-3.19022	0.0306399
AC099788.1	-0.391647	5.88749	-3.29502	0.00142606	0.0466788	-1.48763	-3.18932	0.0306786
NUDT14	0.449605	2.79576	3.28959	0.00143621	0.0469029	-1.16246	3.18727	0.0308259
EFCAB2	-0.529821	6.57122	-3.28709	0.00143947	0.0469029	-1.51225	-3.18662	0.0308259
UBN1	-0.196403	6.51195	-3.28954	0.00144072	0.0469029	-1.52638	-3.18637	0.0308259
ERBIN	0.205307	7.36852	3.28492	0.00145044	0.047134	-1.63548	3.18442	0.0309778
SNX8	-0.265479	4.76194	-3.28635	0.00145893	0.0473246	-1.39701	-3.18273	0.0311031
PLCH1-AS1	-0.696995	0.508177	-3.28269	0.00146581	0.0474108	-1.1541	-3.18137	0.0311597
PRC1-AS1	0.629084	0.41257	3.28105	0.00146685	0.0474108	-1.14843	3.18116	0.0311597
EFHC1	-0.142068	7.03723	-3.28319	0.0014699	0.0474239	-1.58806	-3.18056	0.0311684
AL121935.1	-0.620817	2.07779	-3.27791	0.00148153	0.0476345	-1.15626	-3.17828	0.0313068
AC004076.2	-0.732926	2.07903	-3.27787	0.00148172	0.0476345	-1.16025	-3.17824	0.0313068
ARL6IP1	0.458471	6.65847	3.28031	0.00148994	0.0478134	-1.55163	3.17664	0.0314243
FAM106C	0.968107	0.466924	3.27591	0.00149982	0.0480448	-1.19086	3.17472	0.0315764
SGTA	0.264766	4.82263	3.27156	0.00151483	0.0483718	-1.44131	3.17183	0.0317913
SYNE2	0.997127	7.35208	3.27048	0.00151713	0.0483718	-1.68697	3.17139	0.0317913
FAM66A	1.037	-0.188274	3.27053	0.00151808	0.0483718	-1.2087	3.1712	0.0317913
C4orf51	0.595486	0.146446	3.26788	0.00153517	0.0487279	-1.22635	3.16795	0.0320254
ABTB1	0.34484	3.17266	3.26606	0.00153844	0.0487279	-1.30764	3.16733	0.0320254
ECHS1	0.37222	3.68269	3.2683	0.00153969	0.0487279	-1.31552	3.1671	0.0320254
AGBL3	-0.301536	4.65193	-3.26587	0.00154009	0.0487279	-1.43348	-3.16702	0.0320254
HSPA1A	1.34072	4.0827	3.26513	0.00154287	0.0487304	-1.33747	3.1665	0.032027
AC007114.2	-0.354244	5.12366	-3.26237	0.00155619	0.0490648	-1.46692	-3.164	0.0322468
SRBD1	0.239542	5.5607	3.26343	0.00155927	0.0490761	-1.54702	3.16342	0.0322542
PCBP4	0.350527	8.39587	3.26043	0.0015657	0.0491926	-1.75541	3.16222	0.0323308
AFMID	0.502904	1.71464	3.25758	0.00157977	0.0495482	-1.2171	3.15962	0.0325645
IL1RAPL2	0.957281	0.595146	3.25475	0.00160211	0.0501025	-1.23248	3.15552	0.0329288
LDLRAP1	0.349406	3.80687	3.25294	0.00160301	0.0501025	-1.41692	3.15536	0.0329288
ZNF396	-0.385943	1.71793	-3.24984	0.00161877	0.0504799	-1.2354	-3.1525	0.0331768
SH3GL1	0.264308	4.19511	3.25119	0.0016207	0.0504799	-1.43589	3.15216	0.0331768
POLQ	-0.955999	3.62982	-3.24694	0.00163357	0.0507411	-1.38034	-3.14985	0.0333485
KLHL26	0.51053	0.907738	3.24748	0.00163472	0.0507411	-1.24138	3.14964	0.0333485
TMEM161A	0.291728	3.56458	3.24576	0.00164048	0.050749	-1.38	3.14861	0.0333536
ZDHHC11	0.598413	1.6147	3.24624	0.00164061	0.050749	-1.26877	3.14859	0.0333536
VAMP8	-0.535905	2.69537	-3.24444	0.00164659	0.0507805	-1.26889	-3.14752	0.0333744
RABEP2	-0.345184	5.11574	-3.24494	0.00164727	0.0507805	-1.54003	-3.1474	0.0333744
MDC1	-0.242417	4.6149	-3.24171	0.00166064	0.0510228	-1.52312	-3.14504	0.0335336
ARHGAP27	0.552585	1.57929	3.24129	0.00166286	0.0510228	-1.2664	3.14465	0.0335336
LINC02408	0.459829	4.24155	3.2408	0.00166567	0.0510228	-1.48553	3.14415	0.0335336
AC036103.1	-0.426485	2.08996	-3.24425	0.00166836	0.0510228	-1.2894	-3.14368	0.0335336
SLC16A14	-0.506237	3.851	-3.24095	0.0016693	0.0510228	-1.41519	-3.14352	0.0335336
SUMO3	0.442733	3.25696	3.24222	0.00167978	0.051196	-1.35408	3.14169	0.0336474
LINC02296	-0.933648	2.87195	-3.23841	0.00168065	0.051196	-1.3359	-3.14153	0.0336474
FAAP20	0.288137	3.6796	3.23735	0.00168821	0.0513394	-1.41144	3.14022	0.0337417
PLEKHH3	0.526805	1.45316	3.23329	0.00171448	0.0520503	-1.28287	3.13569	0.0342089
MED22	0.371922	1.8863	3.2305	0.00172012	0.0521175	-1.29531	3.13473	0.0342531
AP006261.1	0.472616	2.36078	3.23006	0.00172248	0.0521175	-1.34486	3.13433	0.0342531
LINC01362	-0.511133	3.05225	-3.23191	0.00172776	0.0521894	-1.38291	-3.13343	0.0343003
SLC9A3R2	0.87932	0.306952	3.22523	0.00174908	0.0526656	-1.36494	3.12983	0.0346133
AP001439.1	-0.920958	0.800407	-3.22547	0.00174938	0.0526656	-1.29316	-3.12978	0.0346133
CCR3	-0.869486	-0.330015	-3.22542	0.00175998	0.0528963	-1.30651	-3.128	0.034765
ACP6	0.762493	1.69265	3.22182	0.00176754	0.053035	-1.34537	3.12674	0.0348561
SRC	0.346161	2.78081	3.2212	0.00177297	0.0530398	-1.40721	3.12584	0.0348593
AL033380.1	0.422537	1.95339	3.22092	0.00177372	0.0530398	-1.35885	3.12572	0.0348593
RNF169	-0.199613	6.79684	-3.22336	0.00177654	0.0530398	-1.74399	-3.12525	0.0348593
MIR9-3HG	0.25789	4.97043	3.21974	0.00178709	0.0532666	-1.62287	3.12351	0.0350083
RUNDC3A	0.336805	3.16067	3.2165	0.00179726	0.053481	-1.4235	3.12184	0.0351492
CYP51A1	-0.351274	5.56235	-3.21462	0.00180975	0.0536969	-1.67635	-3.1198	0.0352911
FASTKD2	-0.262358	5.68432	-3.21478	0.00181048	0.0536969	-1.68855	-3.11968	0.0352911
MUC20	0.55014	4.58821	3.21301	0.00181688	0.0537981	-1.62191	3.11864	0.0353576
C1QTNF6	0.757367	-0.14201	3.21263	0.00182219	0.0538668	-1.37964	3.11778	0.0354028
GBA	-0.35355	2.58891	-3.2122	0.0018266	0.0539086	-1.37504	-3.11707	0.0354302
DPYSL4	0.356297	5.27536	3.20833	0.00184362	0.0543106	-1.67322	3.11433	0.0356944
SMIM5	0.769626	-0.261111	3.20755	0.0018487	0.0543106	-1.4013	3.11352	0.0356944
PCDH12	-0.581105	0.974999	-3.21252	0.00185005	0.0543106	-1.3399	-3.1133	0.0356944
SIMC1	0.233985	4.41886	3.20712	0.00185261	0.0543106	-1.60256	3.1129	0.0356944
NFKBIZ	-0.704649	0.759036	-3.20705	0.0018553	0.0543106	-1.35801	-3.11247	0.0356944
TOLLIP	0.325614	3.27065	3.20602	0.00185954	0.0543463	-1.46847	3.11179	0.0357179
AL627309.5	0.492212	1.3767	3.20594	0.00187073	0.0545848	-1.35001	3.11002	0.0358747
BEND7	0.247214	5.18279	3.20233	0.00187847	0.0547217	-1.70947	3.1088	0.0359647
FLRT1	0.564705	0.971539	3.20283	0.00188632	0.0548533	-1.36126	3.10757	0.0360511
CDK3	0.428611	1.57782	3.20052	0.00188908	0.0548533	-1.37653	3.10714	0.0360511
LINC02112	-0.867304	2.36637	-3.2066	0.00189371	0.0548992	-1.36405	-3.10642	0.0360813
NTHL1	0.586004	1.30823	3.19681	0.00191467	0.0554139	-1.37628	3.10316	0.0364195
CLCA4-AS1	0.532809	2.13122	3.19574	0.00191762	0.0554139	-1.42596	3.1027	0.0364195
KLRC2	0.825384	0.225994	3.19543	0.00192618	0.0554909	-1.41549	3.10138	0.0364702
AC004147.5	-0.815979	2.10013	-3.19276	0.00193525	0.0554909	-1.38176	-3.09999	0.0364702
AL136528.2	0.79411	1.69603	3.19308	0.00193537	0.0554909	-1.38615	3.09997	0.0364702
GRINA	0.350729	5.23939	3.19701	0.00193547	0.0554909	-1.6442	3.09996	0.0364702
DEAF1	0.236017	5.2261	3.19292	0.0019367	0.0554909	-1.71929	3.09977	0.0364702
SMAD2	-0.21647	8.95475	-3.19299	0.00194386	0.0554909	-1.95611	-3.09868	0.0364702
EBPL	0.304291	4.1395	3.19299	0.00194583	0.0554909	-1.59137	3.09838	0.0364702
AL592295.3	-0.522438	1.41325	-3.19105	0.00194621	0.0554909	-1.3839	-3.09832	0.0364702
CAMK2B	0.422427	4.86953	3.19265	0.00194836	0.0554909	-1.65916	3.09799	0.0364702
PPEF2	-0.395937	8.43016	-3.19088	0.00195207	0.0554909	-1.93554	-3.09743	0.0364702
RPS3	0.451592	6.03066	3.19496	0.00195419	0.0554909	-1.72523	3.09711	0.0364702
LINC00457	-0.341208	9.05833	-3.18814	0.00198085	0.0560592	-1.97381	-3.09309	0.0368437
LXN	-0.337784	3.62227	-3.18777	0.00198352	0.0560592	-1.56905	-3.09269	0.0368437
MATK	0.353405	3.37217	3.18503	0.00198354	0.0560592	-1.51328	3.09269	0.0368437
RSRP1	-0.302306	7.26706	-3.18464	0.00199014	0.0560597	-1.88344	-3.0917	0.036844
AC083798.2	-0.225092	4.69563	-3.18386	0.00199382	0.0560597	-1.66214	-3.09115	0.036844
FAM153A	1.78104	2.43009	3.18256	0.00199755	0.0560597	-1.55684	3.0906	0.036844
SOX10	0.511505	1.14829	3.18313	0.00200149	0.0560597	-1.41087	3.09001	0.036844
CPTP	0.542696	0.762896	3.18493	0.00200176	0.0560597	-1.4233	3.08997	0.036844
AC061975.8	-0.409722	3.41022	-3.18381	0.00200225	0.0560597	-1.55227	-3.0899	0.036844
ADM5	0.443873	1.68747	3.18179	0.00200995	0.056188	-1.43871	3.08876	0.0369283
NCDN	0.404475	2.52451	3.17928	0.00201822	0.0563318	-1.47652	3.08754	0.0370228
FBXL19	0.264326	3.18066	3.17874	0.00202374	0.0563985	-1.54792	3.08673	0.0370667
PDZK1	-0.539007	2.69477	-3.17718	0.00203234	0.0565048	-1.47365	-3.08547	0.0371365
AC018752.1	-0.423271	2.79093	-3.17683	0.00203493	0.0565048	-1.47599	-3.08509	0.0371365
AC005037.1	-0.321089	5.51894	-3.17638	0.00203697	0.0565048	-1.77174	-3.08479	0.0371365
AC008771.1	-0.294265	6.97074	-3.17503	0.0020541	0.0568923	-1.87912	-3.0823	0.0373912
AP002026.1	0.578336	1.53132	3.17281	0.0020597	0.0568985	-1.45183	3.08149	0.0373953
TLE5	0.284634	5.14596	3.1758	0.00206065	0.0568985	-1.72336	3.08135	0.0373953
KLHL32	0.314014	4.03965	3.17058	0.00207313	0.0570048	-1.67658	3.07955	0.0374651
AC051619.6	0.410288	2.22463	3.17077	0.00207501	0.0570048	-1.48584	3.07928	0.0374651
RBM39	-0.136178	8.23011	-3.17254	0.00207653	0.0570048	-1.96902	-3.07906	0.0374651
AL391261.2	-0.626821	1.8305	-3.17011	0.00207716	0.0570048	-1.44436	-3.07897	0.0374651
IL7	-0.450833	3.95363	-3.17337	0.00208339	0.0570887	-1.68564	-3.07808	0.0375203
AP002370.2	-0.390531	6.34913	-3.16815	0.00209102	0.0572108	-1.84671	-3.07699	0.0376006
CHID1	0.245024	4.21936	3.16593	0.00211179	0.057537	-1.66084	3.07404	0.037815
AC019211.1	-0.914185	2.44071	-3.16571	0.00211244	0.057537	-1.47684	-3.07395	0.037815
SH3BGR	0.440668	3.7427	3.16408	0.00211527	0.057537	-1.66845	3.07355	0.037815
SCRIB	0.354937	2.54831	3.16377	0.00211729	0.057537	-1.54318	3.07327	0.037815
AL136501.1	-1.06429	1.49879	-3.16326	0.00212063	0.057537	-1.45055	-3.0728	0.037815
DDX20	-0.24967	2.92887	-3.16303	0.00212212	0.057537	-1.58315	-3.07259	0.037815
SBF1	0.322206	2.33476	3.16055	0.00213878	0.0579015	-1.52836	3.07025	0.0380545
SLC38A5	0.644499	3.02891	3.15871	0.00215085	0.0579789	-1.57342	3.06857	0.0381054
AC104389.5	0.791788	0.879681	3.15872	0.00215092	0.0579789	-1.4684	3.06856	0.0381054
AC073167.1	-0.320205	5.21014	-3.16354	0.0021513	0.0579789	-1.77172	-3.06851	0.0381054
LYRM2	-0.315042	5.51783	-3.15797	0.00215557	0.058007	-1.84734	-3.06792	0.0381239
ZC3H3	0.230115	4.04369	3.15693	0.00216283	0.0581157	-1.7027	3.06691	0.0381953
CLDN2	-0.781933	-0.140866	-3.15431	0.00218078	0.0585107	-1.54399	-3.06444	0.0384549
LINC00863	-0.382728	2.89782	-3.15243	0.00219271	0.0587072	-1.60286	-3.06281	0.038584
CXXC5	0.303962	4.19057	3.15287	0.00219762	0.0587072	-1.7063	3.06214	0.038584
DIRAS3	-0.467247	2.46908	-3.1539	0.00219928	0.0587072	-1.51141	-3.06191	0.038584
MIR3659HG	0.438685	3.12219	3.15038	0.00220662	0.0587072	-1.65172	3.06091	0.038584
PARP16	0.245819	4.9465	3.15	0.00220927	0.0587072	-1.80152	3.06056	0.038584
AC079177.1	-0.423141	3.15852	-3.15075	0.00221216	0.0587072	-1.59012	-3.06016	0.038584
NDRG2	0.639539	1.99976	3.15143	0.00221413	0.0587072	-1.49653	3.0599	0.038584
ZBED3	-0.251726	4.77792	-3.15204	0.00221744	0.0587072	-1.74189	-3.05945	0.038584
CRYZL1	-0.163896	6.39263	-3.1506	0.00221989	0.0587072	-1.90467	-3.05912	0.038584
SRSF11	-0.153728	7.23371	-3.15025	0.00222104	0.0587072	-1.98472	-3.05896	0.038584
RFPL3S	0.63218	0.328844	3.1475	0.00222856	0.0587072	-1.49887	3.05795	0.038584
LRRN3	-0.355218	3.01349	-3.15286	0.00223046	0.0587072	-1.60168	-3.0577	0.038584
REV3L	-0.116629	8.33458	-3.14622	0.0022352	0.0587072	-2.07477	-3.05706	0.038584
RANGAP1	0.241429	4.23438	3.14632	0.00223647	0.0587072	-1.75528	3.05689	0.038584
DYNLL2	0.439988	3.36278	3.14682	0.00223703	0.0587072	-1.64742	3.05681	0.038584
RSPH3	-0.165489	5.4136	-3.14372	0.00225243	0.0589768	-1.87579	-3.05476	0.0387612
VIRMA	-0.151741	5.70176	-3.14358	0.00225385	0.0589768	-1.89189	-3.05457	0.0387612
SPATA6L	-0.586164	5.37751	-3.14304	0.00226061	0.0590147	-1.83678	-3.05367	0.0387861
PACS2	0.196719	5.06023	3.14379	0.00226185	0.0590147	-1.82727	3.0535	0.0387861
LINC02703	-0.496143	2.27196	-3.14541	0.00226842	0.0590981	-1.57238	-3.05263	0.038841
NCAPG2	0.321048	2.56461	3.14096	0.00227162	0.0590981	-1.59754	3.05221	0.038841
ZNF827	0.329531	5.08905	3.13999	0.00227838	0.0591886	-1.85076	3.05132	0.0389004
HMGN3	-0.238376	7.39801	-3.14024	0.00228212	0.0592003	-2.01237	-3.05083	0.0389081
AL157997.1	-0.574886	0.927171	-3.14176	0.00229119	0.0593162	-1.5179	-3.04964	0.0389843
AC104984.3	-0.3678	3.12787	-3.13834	0.00229318	0.0593162	-1.61588	-3.04938	0.0389843
LINC02221	-0.857408	-0.407227	-3.13811	0.00230105	0.0594346	-1.58791	-3.04835	0.0390621
RFTN1	-0.408601	3.25551	-3.13949	0.00230838	0.0595383	-1.66547	-3.04739	0.0391302
AL121768.1	-0.32307	4.34704	-3.13718	0.00231319	0.0595583	-1.72693	-3.04676	0.0391434
NUP210L	0.661137	2.29814	3.13662	0.00231727	0.0595583	-1.58505	3.04624	0.0391434
TMEM233	-0.681203	1.90973	-3.13423	0.00231908	0.0595583	-1.53469	-3.046	0.0391434
LINC02506	1.99392	0.362775	3.12983	0.00235114	0.0602957	-1.55846	3.04187	0.039628
UNC13D	0.462379	3.73278	3.12979	0.00235615	0.0603382	-1.72529	3.04123	0.0396559
ZC3HC1	-0.270301	4.20467	-3.12948	0.00236065	0.0603676	-1.76936	-3.04065	0.0396753
TRIM2	0.206642	6.33133	3.12664	0.00238063	0.0606637	-1.99605	3.03812	0.0398699
AC092944.1	-0.282389	4.66402	-3.12618	0.00238079	0.0606637	-1.8262	-3.0381	0.0398699
LINC02698	-0.411553	6.317	-3.12546	0.00238234	0.0606637	-1.9992	-3.0379	0.0398699
AC079760.2	-0.744177	0.897556	-3.12455	0.00240475	0.0611263	-1.56001	-3.03508	0.0401739
AL121929.2	-0.660694	3.76567	-3.12231	0.0024073	0.0611263	-1.72201	-3.03476	0.0401739
CHD7	0.200679	8.34086	3.12074	0.00241943	0.0613478	-2.14422	3.03324	0.0403195
STIP1	0.39812	4.11206	3.12013	0.0024245	0.0613899	-1.7975	3.03261	0.0403472
INPP1	-0.540013	2.85353	-3.11875	0.00243189	0.0614905	-1.70285	-3.03169	0.0404133
CLP1	-0.64551	0.468457	-3.11913	0.002447	0.061786	-1.58608	-3.02982	0.0406075
NFYB	0.264526	4.04105	3.11622	0.00245708	0.0619534	-1.80162	3.02858	0.0407175
LINC02848	0.524764	2.34387	3.11415	0.00246641	0.0621019	-1.65368	3.02743	0.0408151
PKM	0.429374	9.15779	3.11367	0.00247469	0.0622231	-2.18274	3.02642	0.0408948
NIPAL4	-0.534465	1.79155	-3.11271	0.00249401	0.0626216	-1.6132	-3.02407	0.0411567
MFSD6	-0.370712	4.44316	-3.10848	0.00250947	0.0628041	-1.90519	-3.0222	0.0412766
ANKRD24	0.412956	3.3935	3.10823	0.00251159	0.0628041	-1.74411	3.02194	0.0412766
PWRN1	-0.615232	2.38161	-3.10829	0.00251175	0.0628041	-1.67451	-3.02192	0.0412766
FAM168B	-0.185937	6.43514	-3.10697	0.00252169	0.0629654	-2.04469	-3.02073	0.0413826
USP54	-0.223607	5.83117	-3.11022	0.0025278	0.0630146	-1.9831	-3.01999	0.041415
CBX7	0.269877	3.94419	3.10557	0.00253189	0.0630146	-1.82815	3.0195	0.041415
SLC25A41	0.841154	0.456005	3.10527	0.00253417	0.0630146	-1.6052	3.01923	0.041415
CRELD2	0.335253	3.46175	3.10357	0.00254777	0.063149	-1.75523	3.01761	0.0415033
DAP	0.414625	3.99533	3.10336	0.00254941	0.063149	-1.86341	3.01741	0.0415033
AC130324.2	-0.276428	3.73514	-3.10334	0.00255009	0.063149	-1.80733	-3.01733	0.0415033
TUBA1C	0.464671	3.24245	3.10216	0.00256208	0.0633299	-1.76957	3.01591	0.0416222
FAM245B	-0.820557	0.646844	-3.10278	0.00256443	0.0633299	-1.62126	-3.01563	0.0416222
UBE2Z	0.197814	4.38151	3.10033	0.0025745	0.0634837	-1.87741	3.01445	0.0417233
ZNF302	-0.219421	6.47355	-3.10036	0.00257771	0.0634837	-2.06146	-3.01407	0.0417233
AL136169.1	-0.574669	2.07304	-3.09908	0.00258926	0.0636178	-1.64867	-3.01271	0.0418114
AC002094.4	-0.613616	0.317452	-3.09814	0.00259023	0.0636178	-1.6328	-3.0126	0.0418114
SLC25A37	0.259782	5.63144	3.09965	0.00259421	0.0636289	-1.98662	3.01213	0.0418187
ACAT2	-0.517651	3.50363	-3.0944	0.00261959	0.0640951	-1.79117	-3.00917	0.0421251
APBA3	0.305324	2.63605	3.09529	0.00262034	0.0640951	-1.71437	3.00909	0.0421251
SFXN5	0.218456	5.34773	3.09264	0.00263467	0.0643581	-2.01938	3.00743	0.042298
XPO1	0.266781	7.363	3.09176	0.00264076	0.0643841	-2.17523	3.00673	0.0423151
AC099344.1	-0.647963	1.84436	-3.0915	0.00264289	0.0643841	-1.64759	-3.00648	0.0423151
AL161725.1	-0.329811	4.23637	-3.09089	0.00265217	0.064523	-1.8871	-3.00542	0.0424063
ZNF571	-0.166586	5.44611	-3.09007	0.00265661	0.0645438	-2.02678	-3.00491	0.04242
TCERG1L	0.292993	5.41509	3.08772	0.00267987	0.064968	-2.02363	3.00226	0.0426988
LINC00886	0.33448	3.89206	3.08675	0.00268135	0.064968	-1.88869	3.00209	0.0426988
ATP13A5	-0.396366	4.76205	-3.08992	0.0026849	0.064968	-1.97611	-3.00169	0.0426988
LINC02360	-0.641231	0.878055	-3.08343	0.00270855	0.0654525	-1.65733	-2.99901	0.0430172
PPARGC1B	-0.220083	6.86191	-3.084	0.00271467	0.0655122	-2.13523	-2.99833	0.0430565
ASIC2	-0.783948	8.36782	-3.08076	0.00273058	0.0656623	-2.21933	-2.99655	0.0431551
TMEM231	-0.2794	5.08235	-3.08102	0.00273082	0.0656623	-1.995	-2.99652	0.0431551
PAFAH2	0.21133	5.08657	3.08084	0.00273183	0.0656623	-2.02048	2.99641	0.0431551
INTS1	0.285792	4.03039	3.07908	0.00274453	0.0658797	-1.90418	2.99499	0.043298
TRMT12	-0.225628	3.57206	-3.07738	0.00275878	0.0660739	-1.87788	-2.99341	0.0434256
AC006972.1	-0.647501	2.24749	-3.08121	0.00275996	0.0660739	-1.82526	-2.99328	0.0434256
TAF1C	0.406196	2.83829	3.07585	0.00277161	0.0662648	-1.80021	2.99199	0.0435511
NEPRO	-0.2409	4.05857	-3.07388	0.00278822	0.0665734	-1.94198	-2.99017	0.0437539
AC092720.1	0.287023	3.03442	3.07334	0.0027928	0.0665944	-1.81052	2.98967	0.0437677
HTRA1	0.474784	4.98389	3.07071	0.00281577	0.0670534	-2.05018	2.98717	0.0440694
NT5M	0.38783	2.47359	3.06789	0.00284839	0.0677405	-1.76825	2.98364	0.0445209
PKDCC	0.820131	3.20395	3.06593	0.00286638	0.068076	-1.83346	2.98172	0.0447415
ERICH1	0.253638	5.1696	3.0638	0.00287763	0.068076	-2.07263	2.98052	0.0447415
AC006504.2	-0.69	1.67163	-3.06397	0.00287805	0.068076	-1.72503	-2.98047	0.0447415
PTGR2	0.232038	4.51086	3.066	0.00287834	0.068076	-1.97093	2.98044	0.0447415
ARAF	-0.302583	3.77968	-3.0646	0.00288353	0.068076	-1.87844	-2.97989	0.0447415
NPIPB12	0.591587	0.236016	3.06258	0.00288531	0.068076	-1.70907	2.9797	0.0447415
MORN5	0.781083	1.39412	3.06219	0.00288897	0.068076	-1.71891	2.97931	0.0447415
NOMO1	0.257863	3.38923	3.06082	0.00290569	0.0683638	-1.86981	2.97754	0.0449306
ARHGEF5	-0.469332	2.01342	-3.05994	0.00291442	0.0683638	-1.75686	-2.97662	0.0449306
TMEM143	0.283694	3.46396	3.05908	0.00291601	0.0683638	-1.87945	2.97646	0.0449306
HRK	0.527449	2.27766	3.05972	0.00291637	0.0683638	-1.79362	2.97642	0.0449306
LRRC17	-0.25543	3.44784	-3.05819	0.00292525	0.0684006	-1.88257	-2.97549	0.0449548
TUSC1	-0.727853	1.07279	-3.05869	0.00292554	0.0684006	-1.72211	-2.97546	0.0449548
C1orf198	0.25107	2.62951	3.05732	0.00293612	0.0685589	-1.84193	2.97435	0.0450589
OIP5-AS1	0.213331	6.61235	3.05806	0.0029567	0.0689225	-2.18447	2.9722	0.0452978
AC109322.1	0.501481	0.76707	3.05458	0.0029616	0.0689225	-1.73382	2.9717	0.0452978
MXI1	0.484567	6.87151	3.05377	0.00296317	0.0689225	-2.25289	2.97153	0.0452978
GRK7	-0.203043	9.7398	-3.05341	0.00298209	0.0692729	-2.37607	-2.96958	0.0455281
CPNE3	-0.169701	5.0318	-3.05024	0.00299492	0.0693424	-2.10366	-2.96826	0.0455738
RUNX2	-0.39254	5.09196	-3.05418	0.00299665	0.0693424	-2.08127	-2.96808	0.0455738
ARMH4	-0.211484	5.61552	-3.05001	0.0030008	0.0693424	-2.14484	-2.96766	0.0455738
TRAPPC6A	0.293101	3.25214	3.05014	0.00300138	0.0693424	-1.84055	2.9676	0.0455738
UQCRFS1	-0.386657	4.94671	-3.05024	0.00301541	0.0693424	-2.03735	-2.96616	0.0455738
OSBPL11	-0.187682	4.81873	-3.04793	0.00301586	0.0693424	-2.08253	-2.96612	0.0455738
ACKR2	0.481049	1.21633	3.04853	0.00301644	0.0693424	-1.74474	2.96606	0.0455738
SKI	0.310665	3.77766	3.04759	0.00301955	0.0693424	-1.99079	2.96574	0.0455738
LINC02284	-0.610924	4.1371	-3.04762	0.00301975	0.0693424	-2.00151	-2.96572	0.0455738
PTPN22	-0.330751	3.33691	-3.04627	0.0030325	0.0694461	-1.91225	-2.96442	0.0456419
PKNOX2	0.951721	0.289872	3.046	0.00303515	0.0694461	-1.76176	2.96416	0.0456419
CCDC144A	0.352746	6.75894	3.04618	0.00303583	0.0694461	-2.25169	2.96409	0.0456419
ZBTB24	-0.296926	4.2991	-3.0452	0.0030532	0.0696954	-2.01248	-2.96233	0.0458058
SPATA21	-0.320742	2.76213	-3.04371	0.00305447	0.0696954	-1.85125	-2.9622	0.0458058
MC1R	0.478015	2.09485	3.04271	0.0030768	0.0698005	-1.81161	2.95996	0.0458749
AC117944.1	-0.924965	2.07206	-3.04118	0.00307912	0.0698005	-1.77333	-2.95973	0.0458749
MAP10	-0.593615	3.26145	-3.04075	0.00308207	0.0698005	-1.91814	-2.95943	0.0458749
ATF7IP2	0.245835	6.70189	3.04085	0.00308237	0.0698005	-2.2664	2.9594	0.0458749
TEX22	0.343403	2.775	3.0417	0.00308501	0.0698005	-1.84528	2.95914	0.0458749
MIRLET7BHG	0.324485	3.37993	3.04055	0.00308803	0.0698005	-1.96418	2.95884	0.0458749
KIZ	0.195129	6.05097	3.04015	0.00308898	0.0698005	-2.22557	2.95874	0.0458749
NPSR1	-0.816957	0.233365	-3.03933	0.00309675	0.0698005	-1.78509	-2.95797	0.0458749
AC127496.5	0.606942	0.94769	3.03894	0.00309958	0.0698005	-1.77457	2.95769	0.0458749
AC010168.2	0.331015	4.12187	3.03888	0.00310129	0.0698005	-2.01876	2.95752	0.0458749
PNCK	0.437869	6.1357	3.03866	0.00310173	0.0698005	-2.20366	2.95747	0.0458749
ZNF621	-0.334347	3.99512	-3.0354	0.00313241	0.070403	-2.00993	-2.95444	0.0462708
RMND5B	-0.200456	5.57325	-3.0365	0.00314117	0.0705118	-2.14686	-2.95357	0.0463423
ATAD3A	0.301853	2.92425	3.03418	0.00315279	0.0706845	-1.8885	2.95243	0.0464559
LINC02246	-0.455318	1.57044	-3.02987	0.0031874	0.0713717	-1.82759	-2.94906	0.0469075
AC138150.1	-0.399822	4.30006	-3.02729	0.00321439	0.0718865	-2.02586	-2.94646	0.0472458
AL137182.1	-0.353524	3.58649	-3.02801	0.00323114	0.0721715	-2.00693	-2.94485	0.0474332
TP53TG5	-0.319631	4.15968	-3.0235	0.00325914	0.0727068	-2.05282	-2.94218	0.0477849
MAPKAPK5-AS1	-0.390949	5.04848	-3.0212	0.0032692	0.072841	-2.16688	-2.94122	0.0478731
C19orf25	-0.256384	4.60001	-3.0191	0.0032992	0.0732679	-2.10664	-2.93839	0.0481537
B4GALT4-AS1	-0.44622	1.78671	-3.01846	0.00331175	0.0732679	-1.84965	-2.93721	0.0481537
PLOD1	0.587004	0.572933	3.01688	0.00331235	0.0732679	-1.82421	2.93716	0.0481537
AC027796.1	0.409663	1.382	3.01683	0.00331317	0.0732679	-1.84378	2.93708	0.0481537
OSER1-DT	0.352063	3.18076	3.0166	0.00331518	0.0732679	-1.98061	2.93689	0.0481537
HSPA1L	0.796598	-0.0669254	3.01699	0.00331633	0.0732679	-1.83567	2.93679	0.0481537
INSL6	-0.44644	4.0975	-3.0159	0.00332077	0.0732679	-2.08696	-2.93637	0.0481537
AC100810.1	-0.445797	2.56898	-3.01882	0.00332092	0.0732679	-1.87427	-2.93636	0.0481537
TBC1D30	0.351186	3.92463	3.01342	0.00334536	0.0736273	-2.06151	2.93408	0.04839
ATP6V1D	-0.177783	6.64231	-3.01369	0.00334594	0.0736273	-2.32771	-2.93403	0.04839
DICER1-AS1	0.201165	6.56583	3.01587	0.00335064	0.0736273	-2.29123	2.93359	0.04839
RAPH1	-0.291849	6.55811	-3.01246	0.00335603	0.0736273	-2.2898	-2.93309	0.04839
PEMT	0.288958	3.09352	3.01303	0.00336526	0.0736273	-1.98346	2.93224	0.04839
LPGAT1	-0.191397	6.57603	-3.01129	0.00336741	0.0736273	-2.3289	-2.93204	0.04839
CMTM2	-0.462467	1.85313	-3.01424	0.00336772	0.0736273	-1.85361	-2.93201	0.04839
ZNF451	-0.137115	6.7937	-3.01097	0.00336993	0.0736273	-2.35177	-2.93181	0.04839
RPF1	-0.239597	4.03957	-3.01038	0.00337585	0.0736672	-2.09051	-2.93126	0.0484162
HSD17B12	-0.298579	5.14695	-3.01052	0.003382	0.073712	-2.16896	-2.9307	0.0484456
LINC00582	-0.705444	0.255796	-3.00908	0.00339398	0.0738838	-1.8601	-2.9296	0.0485585
MYO15B	0.347956	4.86073	3.00723	0.00340801	0.0740994	-2.18103	2.92832	0.0487002
AC116552.1	0.58818	-0.148901	3.00681	0.00341743	0.0741972	-1.85371	2.92746	0.0487645
DNAJB1	0.337831	4.56285	3.00597	0.00342074	0.0741972	-2.13807	2.92716	0.0487645
AC009501.3	-0.280795	4.70792	-3.00695	0.00342834	0.0742726	-2.15942	-2.92647	0.048814
KHDRBS3	0.858674	2.51635	3.00245	0.00346156	0.0748424	-1.96518	2.92347	0.0491885
NEK6	0.481512	1.89437	3.00262	0.00346296	0.0748424	-1.90114	2.92334	0.0491885
RPL4	0.418146	4.49722	3.00523	0.00347028	0.0748704	-2.10621	2.92268	0.0492069
AC015982.2	0.543833	1.38702	3.00146	0.00347257	0.0748704	-1.87618	2.92248	0.0492069
ARHGEF9	-0.20955	8.73731	-3.00045	0.00349734	0.0753141	-2.4785	-2.92027	0.0494985
ABCA13	0.816361	1.32255	3.0035	0.00350252	0.0753355	-1.87	2.9198	0.0495126
AC132803.1	-0.518404	7.71222	-2.99678	0.00351582	0.0755314	-2.44403	-2.91862	0.0496414
ZNF541	0.509599	2.19973	2.99616	0.00353264	0.0757727	-1.92077	2.91713	0.0497999
AC008938.1	0.537735	3.91625	2.99507	0.00353547	0.0757727	-2.11555	2.91688	0.0497999
AC109630.1	-0.74407	0.255513	-2.99392	0.00354585	0.0759003	-1.87644	-2.91597	0.0498838
DND1	1.17636	1.06369	2.99354	0.00354986	0.0759003	-1.87499	2.91562	0.0498838
CCDC198	-0.571348	0.891113	-2.99478	0.0035655	0.0761444	-1.8841	-2.91424	0.0500442
ZNF561	-0.365861	3.27781	-2.99118	0.00357496	0.0761867	-2.05926	-2.91342	0.0500721
CCDC192	-0.678503	4.0248	-2.99109	0.00357595	0.0761867	-2.09691	-2.91333	0.0500721
AC092675.1	0.233457	6.81197	2.98975	0.00359061	0.0764086	-2.41632	2.91205	0.0502179
CNTN6	-0.445927	3.58855	-2.99167	0.00359671	0.0764481	-2.15433	-2.91152	0.0502438
AC011824.4	-0.748226	-0.457081	-2.99112	0.0036034	0.0765	-1.98586	-2.91094	0.0502779
AL355073.1	-0.747393	1.37391	-2.98692	0.0036236	0.0768382	-1.92846	-2.9092	0.0505003
PDIA4	0.382313	2.78064	2.98442	0.0036476	0.0772249	-2.04779	2.90713	0.0507544
TICAM2	0.373676	2.96129	2.98659	0.00365041	0.0772249	-2.0499	2.90689	0.0507544
CNNM3	0.227652	3.63587	2.98259	0.00366743	0.0774939	-2.15121	2.90543	0.0509312
ALKBH5	0.304044	5.54605	2.9826	0.00368537	0.0777815	-2.2965	2.90391	0.0511202
ATP9A	0.236476	4.83632	2.97938	0.00370266	0.078055	-2.26432	2.90244	0.0512999
XRCC2	0.480166	1.31145	2.97873	0.00370981	0.0781144	-1.93431	2.90184	0.051339
FAM124A	0.294879	6.53634	2.97709	0.00372794	0.0783695	-2.44371	2.90031	0.0515066
EIF2B4	-0.296916	4.21368	-2.97769	0.00373479	0.0783695	-2.17259	-2.89973	0.0515066
AC016907.2	0.477007	3.31888	2.97645	0.00373726	0.0783695	-2.10285	2.89953	0.0515066
NAALADL2-AS1	-0.51697	0.377408	-2.97637	0.00373934	0.0783695	-1.92257	-2.89935	0.0515066
FES	0.686613	-0.589383	2.97479	0.0037534	0.0784908	-1.94539	2.89818	0.0515864
ZNF154	-0.287209	3.11931	-2.97836	0.00375385	0.0784908	-2.07904	-2.89814	0.0515864
LAMTOR5-AS1	0.231762	4.21702	2.97346	0.00376828	0.0786431	-2.22307	2.89694	0.0516864
AC138028.1	0.49317	1.58561	2.97331	0.00376987	0.0786431	-1.94949	2.8968	0.0516864
HMGB2	0.489729	4.34288	2.97239	0.0037837	0.0788403	-2.20467	2.89565	0.0518161
UBXN4	-0.133698	8.43102	-2.971	0.0038127	0.0792807	-2.53341	-2.89326	0.0521055
EML2-AS1	-0.902658	3.10007	-2.97091	0.00381365	0.0792807	-2.02605	-2.89318	0.0521055
ZSCAN20	0.456464	0.956968	2.96953	0.00381959	0.0793126	-1.94599	2.89269	0.0521265
RABIF	-0.396082	2.23979	-2.96768	0.00383362	0.0794387	-2.00357	-2.89154	0.0522094
ZNF483	-0.258449	5.34594	-2.96757	0.00383573	0.0794387	-2.31667	-2.89136	0.0522094
KAT5	-0.226591	4.54365	-2.96719	0.0038389	0.0794387	-2.24211	-2.89111	0.0522094
ZNF10	-0.26942	5.81183	-2.96947	0.00384471	0.0794677	-2.36213	-2.89063	0.0522284
KMT2E-AS1	0.375817	4.03568	2.96706	0.00386906	0.0797916	-2.16734	2.88864	0.0524413
RNF34	-0.183433	5.58078	-2.96491	0.00386925	0.0797916	-2.35865	-2.88863	0.0524413
TECR	0.242076	6.02338	2.96524	0.0038825	0.0799733	-2.38263	2.88755	0.0525607
QSOX1	0.261724	3.35453	2.9622	0.00389606	0.0800377	-2.15846	2.88646	0.0526031
SLC4A2	0.370312	2.83234	2.96215	0.00389668	0.0800377	-2.07545	2.88641	0.0526031
SRXN1	0.554893	0.353388	2.96197	0.00390157	0.0800377	-1.9579	2.88601	0.0526031
PIK3C2A	-0.176841	7.34324	-2.96185	0.00390341	0.0800377	-2.50913	-2.88586	0.0526031
SMCO3	-0.527112	1.12446	-2.96239	0.00391853	0.0801871	-1.96468	-2.88465	0.0527012
FAM117B	0.205529	5.76075	2.95986	0.0039231	0.0801871	-2.42623	2.88428	0.0527012
BMPER	-0.684452	5.58134	-2.95955	0.00392774	0.0801871	-2.37544	-2.88391	0.0527012
LINC02613	0.559267	0.0332174	2.95945	0.00392851	0.0801871	-1.96232	2.88385	0.0527012
FAM193B	0.190564	5.18891	2.95848	0.00394292	0.0803032	-2.37306	2.88269	0.0527775
SUSD4	0.287839	4.7668	2.95852	0.00394312	0.0803032	-2.32661	2.88268	0.0527775
AL035681.1	-0.32414	3.12906	-2.95584	0.0039709	0.0807774	-2.10738	-2.88046	0.0530892
CLEC6A	0.653861	0.0494206	2.95374	0.00399519	0.0811799	-1.97577	2.87854	0.0533537
CAPN15	0.244014	3.09193	2.95252	0.00401022	0.0813935	-2.13338	2.87736	0.0534941
VPREB3	0.610081	0.913692	2.95472	0.00403097	0.0817225	-1.98104	2.87573	0.0537103
DLEU7	-0.730011	1.85872	-2.94946	0.00404552	0.0818738	-2.00164	-2.87459	0.0538098
PRKG1	-0.826774	5.76928	-2.94989	0.00404753	0.0818738	-2.42236	-2.87443	0.0538098
HEMK1	0.353264	2.83759	2.94857	0.00405613	0.0819557	-2.13431	2.87376	0.0538636
KCNQ4	-0.782466	0.216988	-2.94732	0.00407107	0.0821654	-1.99492	-2.8726	0.0540014
LINC02519	0.5524	0.533253	2.94666	0.00407974	0.082248	-1.99479	2.87193	0.0540557
B3GALT5	0.804602	5.11046	2.94589	0.00409498	0.082399	-2.38795	2.87075	0.054155
AC016644.1	-0.373696	2.76371	-2.94928	0.00409808	0.082399	-2.15563	-2.87051	0.054155
N4BP2L2	-0.110838	8.89924	-2.94523	0.0041087	0.082399	-2.63866	-2.86969	0.054155
BTBD18	-0.365638	3.03047	-2.94562	0.00410899	0.082399	-2.11975	-2.86967	0.054155
AC137494.1	-0.552551	4.1141	-2.94398	0.00411131	0.082399	-2.25461	-2.86949	0.054155
ZFP14	-0.198801	6.15383	-2.94378	0.00411469	0.082399	-2.4536	-2.86923	0.054155
SSX2IP	-0.391252	8.83888	-2.94287	0.00412482	0.0825101	-2.65309	-2.86846	0.054228
AL355488.1	0.500416	1.45703	2.9419	0.00414515	0.082758	-2.03124	2.8669	0.0543909
PPP1R3F	0.244312	3.78399	2.94095	0.00414821	0.082758	-2.24708	2.86667	0.0543909
NDEL1	-0.151492	5.56279	-2.9428	0.00415238	0.082758	-2.42008	-2.86635	0.0543909
SRP14-AS1	0.24916	4.53239	2.94016	0.004158	0.082758	-2.33303	2.86592	0.0543909
AC010491.1	0.529363	1.05522	2.94012	0.0041602	0.082758	-2.01447	2.86575	0.0543909
GINS3	-0.758691	1.38447	-2.93922	0.00417105	0.08283	-2.01958	-2.86493	0.0544382
TPCN2	0.270969	2.85912	2.93898	0.00417301	0.08283	-2.16165	2.86478	0.0544382
IFI27L1	0.199529	4.53391	2.94041	0.00417899	0.0828553	-2.31316	2.86432	0.0544548
CDRT1	0.609035	-0.0586076	2.93834	0.0041835	0.0828553	-2.01905	2.86398	0.0544548
ARRDC1	0.200527	5.32689	2.93836	0.0042095	0.0830048	-2.3908	2.86202	0.0545531
AC010996.1	0.677602	-0.297246	2.93534	0.00421728	0.0830048	-2.03212	2.86143	0.0545531
RRAGB	-0.142675	5.6111	-2.93533	0.00422068	0.0830048	-2.4402	-2.86118	0.0545531
SYT4	-0.646839	2.63324	-2.93771	0.00423102	0.0830048	-2.05272	-2.8604	0.0545531
AC012360.1	-0.601455	0.444807	-2.93419	0.00423333	0.0830048	-2.01747	-2.86023	0.0545531
WDR76	-0.325912	2.67165	-2.93407	0.00423595	0.0830048	-2.13466	-2.86003	0.0545531
LINC02539	-0.952649	1.89682	-2.93344	0.00424091	0.0830048	-2.03993	-2.85966	0.0545531
GCNA	0.390822	3.89707	2.93339	0.00424144	0.0830048	-2.30873	2.85962	0.0545531
VWA3B	-0.540173	5.89925	-2.93349	0.0042452	0.0830048	-2.4194	-2.85934	0.0545531
AL606807.1	-0.916553	-0.796575	-2.93309	0.00424524	0.0830048	-2.07616	-2.85934	0.0545531
AC010967.1	-0.875945	-0.37391	-2.93304	0.00424583	0.0830048	-2.03849	-2.8593	0.0545531
RARA	0.29052	4.01306	2.93613	0.00424666	0.0830048	-2.29559	2.85923	0.0545531
SCARB1	0.226945	6.57491	2.93281	0.00425506	0.0830048	-2.52946	2.85861	0.0545531
AP005059.1	-0.315315	5.05574	-2.93545	0.00425924	0.0830048	-2.35472	-2.8583	0.0545531
IMPDH2	0.382281	1.96778	2.9331	0.0042602	0.0830048	-2.06054	2.85822	0.0545531
ZBTB11	-0.181871	4.91444	-2.93735	0.00426606	0.083029	-2.37437	-2.85779	0.054569
AC073046.3	-0.371559	3.08555	-2.93293	0.0042845	0.0832979	-2.19394	-2.85642	0.0547457
QRICH1	-0.176221	6.10417	-2.93047	0.00430728	0.0836504	-2.48113	-2.85473	0.0549774
SORBS3	0.473385	3.20833	2.92898	0.00431826	0.0837734	-2.21668	2.85393	0.0550582
USP12-AS1	-0.349563	4.04004	-2.92712	0.00433224	0.083954	-2.28738	-2.8529	0.0551769
PUS1	0.288391	2.90957	2.92564	0.00433928	0.0840002	-2.18551	2.85238	0.0552073
EVI2B	-0.324594	3.5863	-2.92896	0.00435417	0.0841724	-2.26351	-2.85129	0.0553205
NAALADL2	-0.229849	8.67567	-2.92409	0.00436136	0.0841724	-2.68693	-2.85077	0.0553205
SUPT6H	-0.24118	6.22504	-2.92457	0.00436229	0.0841724	-2.51638	-2.8507	0.0553205
AL512328.1	0.277018	7.01478	2.92461	0.00436688	0.0841724	-2.59929	2.85037	0.0553205
NPIPA5	0.625405	0.11358	2.92265	0.00437736	0.0842842	-2.04347	2.8496	0.0553939
AL139021.1	-0.290602	5.66059	-2.923	0.00438503	0.0843415	-2.45291	-2.84905	0.0554316
GRIPAP1	-0.197023	7.22411	-2.92373	0.00439954	0.0843611	-2.58465	-2.848	0.0554445
PYY	0.725943	0.0175502	2.92225	0.00440193	0.0843611	-2.07259	2.84782	0.0554445
AC006213.2	0.529972	3.35195	2.92	0.00441168	0.0843611	-2.24966	2.84712	0.0554445
GAA	0.260633	3.5219	2.91893	0.00442538	0.0843611	-2.27277	2.84613	0.0554445
SLC35G1	0.406559	2.47305	2.9186	0.0044296	0.0843611	-2.22169	2.84583	0.0554445
ILF3-DT	-0.325181	5.09222	-2.92025	0.00443065	0.0843611	-2.39278	-2.84575	0.0554445
EDDM13	-0.335616	4.38503	-2.91947	0.00443177	0.0843611	-2.34602	-2.84567	0.0554445
PRNCR1	0.382385	2.08006	2.91853	0.00443226	0.0843611	-2.1341	2.84564	0.0554445
AC024610.1	-0.743594	0.586321	-2.91948	0.00443274	0.0843611	-2.06582	-2.8456	0.0554445
MRPL19	-0.15073	5.4849	-2.91889	0.00443291	0.0843611	-2.46797	-2.84559	0.0554445
RRP36	-0.201302	5.04443	-2.91863	0.00444255	0.0843635	-2.42066	-2.8449	0.0554461
AP003071.2	-0.846238	1.5084	-2.9172	0.00444778	0.0843635	-2.06452	-2.84452	0.0554461
DUSP22	0.398067	2.05196	2.91673	0.00445396	0.0843635	-2.13907	2.84408	0.0554461
DCTN4	-0.150657	6.42481	-2.91785	0.00445401	0.0843635	-2.54921	-2.84408	0.0554461
SCNN1D	0.415887	0.810968	2.91671	0.00445646	0.0843635	-2.07786	2.8439	0.0554461
ZNF273	0.532536	2.6641	2.9156	0.00446876	0.0844647	-2.19071	2.84302	0.0555126
ANXA5	-0.179251	5.35284	-2.91525	0.0044738	0.0844647	-2.48871	-2.84267	0.0555126
AC100800.1	-0.349588	4.93886	-2.91645	0.00447588	0.0844647	-2.41048	-2.84252	0.0555126
TYRO3	0.835047	1.00039	2.91392	0.00449073	0.0845778	-2.07657	2.84146	0.0555869
KLC1	0.132718	6.92431	2.91388	0.00449127	0.0845778	-2.62872	2.84142	0.0555869
C20orf204	0.558245	0.10274	2.91024	0.00454428	0.0854865	-2.07901	2.83768	0.0561842
LRRIQ4	0.34194	1.80343	2.90947	0.00454957	0.0854968	-2.13145	2.83731	0.0561909
SETMAR	-0.345202	2.67475	-2.91063	0.00455992	0.085532	-2.19512	-2.83658	0.0562141
HNRNPH1	0.224311	7.13092	2.90912	0.00456217	0.085532	-2.64643	2.83643	0.0562141
AL022097.1	-0.320711	3.94293	-2.91025	0.00456574	0.085532	-2.3378	-2.83618	0.0562141
ARRDC4	0.427263	1.56499	2.9079	0.00457045	0.085532	-2.14763	2.83585	0.0562141
CDK5RAP2	0.205318	5.43237	2.90716	0.00458085	0.0856377	-2.52517	2.83512	0.0562835
RARRES1	-0.280088	3.9016	-2.90793	0.00460208	0.0859453	-2.33608	-2.83364	0.0564857
PTPRD-AS1	-0.848931	-0.504045	-2.90388	0.00463003	0.0863777	-2.12701	-2.83171	0.0567699
SGCE	-0.181197	6.73373	-2.90065	0.00467403	0.0870661	-2.6343	-2.82868	0.0572223
AC034195.1	-0.375652	5.8102	-2.90011	0.00467661	0.0870661	-2.56108	-2.8285	0.0572223
SP2-AS1	-0.391437	3.7994	-2.90005	0.00468701	0.0871697	-2.35297	-2.82779	0.0572904
LINC01237	0.688221	0.338108	2.89732	0.00471382	0.0873491	-2.10758	2.82597	0.0574083
AL096869.2	-0.526531	0.410209	-2.89719	0.00471637	0.0873491	-2.10477	-2.82579	0.0574083
CCSAP	0.219143	5.14226	2.89765	0.00472071	0.0873491	-2.50605	2.8255	0.0574083
RASGRP1	-0.389554	3.79115	-2.89709	0.00473175	0.0873491	-2.32235	-2.82475	0.0574083
BCKDHA	0.366679	4.34519	2.89599	0.00473207	0.0873491	-2.41976	2.82473	0.0574083
AC097515.1	0.592889	2.88667	2.89587	0.00473613	0.0873491	-2.31487	2.82445	0.0574083
TCP11L2	0.307633	4.23506	2.89572	0.00474027	0.0873491	-2.43731	2.82417	0.0574083
CCN1	-1.47744	-1.08579	-2.89522	0.00474297	0.0873491	-2.20119	-2.82399	0.0574083
SLC15A2	0.434613	2.2034	2.89508	0.00474473	0.0873491	-2.21108	2.82387	0.0574083
ZFP82	-0.211879	4.56063	-2.89508	0.00474518	0.0873491	-2.43807	-2.82384	0.0574083
SLC17A5	-0.231205	7.00393	-2.89503	0.00476219	0.0873613	-2.65092	-2.82269	0.0574163
SSH3	0.735992	-0.183147	2.8935	0.00476753	0.0873613	-2.13708	2.82234	0.0574163
ALG13-AS1	-0.342907	3.30902	-2.89719	0.00477084	0.0873613	-2.33612	-2.82211	0.0574163
KANSL1L	-0.224969	7.6932	-2.89376	0.0047739	0.0873613	-2.70376	-2.82191	0.0574163
AC020892.2	-0.402759	2.47861	-2.89308	0.00477493	0.0873613	-2.21487	-2.82184	0.0574163
PRTFDC1	-0.867358	1.52836	-2.8942	0.00477495	0.0873613	-2.12241	-2.82184	0.0574163
USF1	-0.304576	3.21452	-2.89393	0.0047835	0.0873981	-2.28217	-2.82126	0.0574405
MPPED2	-0.267274	9.30809	-2.89272	0.00478674	0.0873981	-2.79996	-2.82105	0.0574405
SNHG5	0.267127	5.78975	2.8917	0.00479153	0.0873981	-2.59741	2.82072	0.0574405
ACVR2B	0.24409	3.97646	2.89116	0.00480655	0.0875834	-2.43084	2.81972	0.0575623
ADAM8	0.385441	1.95571	2.89045	0.00481231	0.0875996	-2.17764	2.81934	0.0575729
AP001120.5	-0.547422	1.58209	-2.89173	0.00481942	0.0876405	-2.17732	-2.81886	0.0575998
EIF5	-0.230237	5.74757	-2.88944	0.00482553	0.0876629	-2.57983	-2.81846	0.0576146
AC008708.2	-0.875377	1.57389	-2.88828	0.00483945	0.0876828	-2.12722	-2.81753	0.0576276
AC007622.2	-0.424047	2.2645	-2.8885	0.00484066	0.0876828	-2.22464	-2.81745	0.0576276
AC044849.1	-0.723089	0.125287	-2.88816	0.00484123	0.0876828	-2.13311	-2.81741	0.0576276
MFF	-0.150855	5.69462	-2.88819	0.00484663	0.0876924	-2.58308	-2.81705	0.0576339
CHMP6	0.244629	3.54223	2.88735	0.00485265	0.087713	-2.37753	2.81666	0.0576475
RPL3	0.536972	6.6025	2.89006	0.00487032	0.0878563	-2.58034	2.81549	0.0577416
SOGA1	0.290748	4.47861	2.88687	0.00487452	0.0878563	-2.43106	2.81521	0.0577416
LRFN5	-0.980049	4.85564	-2.88575	0.00487521	0.0878563	-2.46704	-2.81517	0.0577416
RIPOR1	0.198417	6.46434	2.88507	0.00488664	0.0879467	-2.66552	2.81441	0.0578011
GRM5	1.07536	2.85088	2.88472	0.00489	0.0879467	-2.30545	2.81419	0.0578011
MLEC	0.20289	4.73623	2.88317	0.00491376	0.0882821	-2.52134	2.81263	0.0580215
CYP46A1	-0.150678	6.57232	-2.88454	0.00492264	0.0882821	-2.65345	-2.81205	0.0580215
ZMYM5	-0.126659	6.14363	-2.8827	0.0049311	0.0882821	-2.62866	-2.8115	0.0580215
RLN2	0.647266	-0.123754	2.88241	0.00493272	0.0882821	-2.15799	2.8114	0.0580215
ARMC1	-0.177568	4.85927	-2.88168	0.00493317	0.0882821	-2.52793	-2.81137	0.0580215
FBXL14	0.234754	4.73997	2.88071	0.00494818	0.0884628	-2.51188	2.81039	0.0581403
WDR11-AS1	0.318785	5.93563	2.87903	0.00497275	0.0888138	-2.62675	2.80879	0.0583709
MAP3K13	-0.13077	8.06874	-2.8802	0.00498448	0.0889351	-2.75155	-2.80804	0.0584507
AP000721.2	0.422007	2.32911	2.87706	0.00500981	0.0892986	-2.23632	2.8064	0.0586896
CLVS2	-0.871809	1.23142	-2.87572	0.00502578	0.0894528	-2.1672	-2.80538	0.0587909
SRCIN1	0.493821	2.74786	2.87509	0.0050284	0.0894528	-2.31237	2.80521	0.0587909
ME3	-0.684421	3.64698	-2.87445	0.00503783	0.0895322	-2.39159	-2.8046	0.0588431
ZBTB44	0.142374	6.29678	2.87376	0.00505523	0.0897528	-2.69812	2.80349	0.0589881
ELFN2	0.900911	0.62619	2.87259	0.0050651	0.0898395	-2.16944	2.80286	0.059045
F10	-0.282182	4.24488	-2.8724	0.00507921	0.090001	-2.46485	-2.80197	0.0591512
ASB8	-0.195953	5.4521	-2.87055	0.00509651	0.0902188	-2.60229	-2.80087	0.0592943
HIST1H2BE	0.624495	0.219492	2.87059	0.0051066	0.0903086	-2.17424	2.80023	0.0593533
BX255925.3	0.398976	2.2915	2.86885	0.00512145	0.0904824	-2.29452	2.79929	0.0594676
GRM6	0.92585	0.782662	2.86809	0.00513153	0.0904902	-2.18047	2.79866	0.0594727
ULK2	0.192672	5.33428	2.86826	0.00513607	0.0904902	-2.59641	2.79837	0.0594727
GRM3	-0.589053	1.56791	-2.8697	0.00513926	0.0904902	-2.21407	-2.79817	0.0594727
H2AFX	0.490694	3.87372	2.86995	0.005142	0.0904902	-2.40418	2.798	0.0594727
MDC1-AS1	-0.331153	3.22207	-2.86676	0.00515129	0.0905651	-2.32061	-2.79742	0.0595219
AC005670.3	0.136078	5.93599	2.8678	0.00517466	0.0908482	-2.64348	2.79596	0.059708
ZNF628	-0.505885	0.0440084	-2.86512	0.00517748	0.0908482	-2.18716	-2.79578	0.059708
FAM167A	0.471401	5.41775	2.86377	0.00519605	0.0910852	-2.6144	2.79462	0.0598638
GRSF1	-0.141849	5.91391	-2.86293	0.00521241	0.0912831	-2.65603	-2.7936	0.0599938
BTBD9	-0.235228	8.71423	-2.86271	0.00522127	0.0913054	-2.84577	-2.79306	0.0600084
HIST2H2BF	0.517134	0.373851	2.86192	0.00522382	0.0913054	-2.18512	2.7929	0.0600084
MPP4	-0.158527	10.81	-2.86051	0.00524546	0.0915929	-2.96542	-2.79156	0.0601974
GNL3	-0.226231	4.93368	-2.86182	0.00525045	0.0915929	-2.55227	-2.79125	0.0601974
AC116535.1	-0.544077	0.928217	-2.86017	0.00525877	0.0916493	-2.19655	-2.79074	0.0602345
PRKACB	-0.182014	9.01318	-2.85944	0.00526981	0.0917094	-2.87296	-2.79006	0.060274
TMEM168	-0.172981	6.05074	-2.85864	0.00527693	0.0917094	-2.69003	-2.78962	0.060274
MRM2	-0.358265	2.62295	-2.8584	0.00527808	0.0917094	-2.31919	-2.78955	0.060274
AC104041.1	1.45182	1.5413	2.85805	0.0052826	0.0917094	-2.24392	2.78928	0.060274
ZNF667	0.252632	3.9489	2.85666	0.00530394	0.0919912	-2.50425	2.78797	0.0604592
AC068658.1	-0.759669	0.434553	-2.85548	0.00532264	0.0922266	-2.20351	-2.78683	0.0606139
CLDN9	0.574411	0.398752	2.85466	0.00533452	0.0923437	-2.205	2.78611	0.0606909
AL034417.2	0.618235	-0.0801095	2.85279	0.00536884	0.0927343	-2.2211	2.78403	0.0609476
POLR2E	0.289724	4.19289	2.85251	0.00537604	0.0927343	-2.47055	2.78359	0.0609476
AC013472.2	-0.341938	3.41026	-2.85355	0.00538134	0.0927343	-2.40938	-2.78327	0.0609476
AL109824.1	-0.270363	5.79008	-2.8533	0.00538397	0.0927343	-2.65538	-2.78312	0.0609476
ZFP37	-0.364876	3.51059	-2.85133	0.005386	0.0927343	-2.45253	-2.78299	0.0609476
JAZF1-AS1	0.473199	1.71316	2.85121	0.00538799	0.0927343	-2.29128	2.78287	0.0609476
KLHDC10	-0.176184	6.76217	-2.85115	0.00540855	0.0929992	-2.74294	-2.78164	0.0611217
FERMT2	-0.190544	5.94834	-2.84914	0.00542223	0.0931454	-2.70017	-2.78082	0.0612178
AL513327.1	-0.301606	6.13117	-2.84789	0.00544177	0.0933919	-2.70375	-2.77965	0.0613798
ZFAND5	0.225384	4.36322	2.84935	0.00544966	0.0934384	-2.53893	2.77918	0.0614103
RBM5	0.184211	7.0698	2.84713	0.00546248	0.093569	-2.79274	2.77842	0.0614962
PTRH2	-0.249461	5.34249	-2.84668	0.00550123	0.0941129	-2.64955	-2.77612	0.0618536
AP005131.6	0.476912	3.2816	2.84319	0.00551387	0.0941129	-2.4903	2.77537	0.0618536
GRM7	-0.381425	5.02489	-2.84343	0.00551473	0.0941129	-2.60856	-2.77532	0.0618536
ZNF430	-0.239581	3.96375	-2.84313	0.00551514	0.0941129	-2.50739	-2.7753	0.0618536
ITPK1	0.258837	5.54007	2.84201	0.00553329	0.0943332	-2.696	2.77423	0.0619985
THRAP3	-0.118072	6.56627	-2.84263	0.00554055	0.0943675	-2.75491	-2.7738	0.062021
C22orf39	0.288568	3.33954	2.84246	0.00554703	0.0943887	-2.40854	2.77342	0.0620349
AC003005.2	0.919346	0.386397	2.84048	0.00555709	0.0944145	-2.23809	2.77283	0.0620519
SPRYD7	0.256046	4.70956	2.84053	0.00555904	0.0944145	-2.61074	2.77272	0.0620519
AC011824.1	-0.738457	0.699764	-2.8404	0.00556658	0.0944535	-2.24389	-2.77228	0.0620775
EXTL1	0.491099	0.913304	2.83969	0.00557571	0.0945193	-2.25001	2.77174	0.0621207
AC004828.1	-0.560436	1.18435	-2.83895	0.00558252	0.0945457	-2.25168	-2.77135	0.0621381
HLA-DMA	0.409984	2.72511	2.83966	0.00560432	0.0947941	-2.3669	2.77008	0.0623014
AL499604.1	-0.681207	0.333188	-2.83703	0.00561246	0.0947941	-2.24194	-2.7696	0.0623014
AC114763.1	0.318149	4.24865	2.83736	0.00561298	0.0947941	-2.58096	2.76957	0.0623014
AC091100.1	0.538164	0.776921	2.83568	0.00563884	0.095076	-2.25401	2.76808	0.0624866
SLC17A6	-1.24543	-0.40225	-2.83664	0.00564024	0.095076	-2.26853	-2.76799	0.0624866
DNAH10OS	0.546198	0.964232	2.83677	0.00565314	0.0952043	-2.25542	2.76725	0.062571
POLD3	0.155395	4.59132	2.83407	0.00566084	0.0952449	-2.62219	2.76681	0.0625976
AC008080.3	-0.533563	1.30762	-2.83347	0.00567006	0.0953111	-2.27158	-2.76628	0.0626411
NFE4	-0.317945	3.02772	-2.83718	0.00568256	0.095432	-2.49042	-2.76556	0.0627206
GPR37	-0.984384	1.19831	-2.83289	0.00571421	0.0958741	-2.26049	-2.76375	0.0630111
FERMT1	-0.686362	-0.302779	-2.83035	0.00572102	0.095899	-2.2667	-2.76336	0.0630275
CYBC1	0.312223	2.51412	2.82894	0.00574501	0.0960836	-2.38375	2.76199	0.0631488
AL359979.1	0.702987	-0.17562	2.82868	0.00574859	0.0960836	-2.27023	2.76179	0.0631488
CCDC34	0.285229	3.43599	2.82887	0.00574938	0.0960836	-2.49773	2.76174	0.0631488
AC079226.2	-1.44829	0.0651381	-2.82839	0.00575338	0.0960836	-2.27248	-2.76152	0.0631488
KLRC1	0.704953	0.723066	2.82776	0.0057638	0.0961684	-2.27551	2.76092	0.0632046
LINC00599	0.17568	9.48788	2.82757	0.00577057	0.0961923	-2.98491	2.76054	0.0632203
MIR3681HG	-0.604671	1.4356	-2.82667	0.00578178	0.0962899	-2.28391	-2.75991	0.0632844
MTURN	0.341811	3.93283	2.82588	0.00579721	0.0964576	-2.57248	2.75904	0.0633947
ZNF81	-0.198294	4.74138	-2.82816	0.00581281	0.0966279	-2.63741	-2.75816	0.0635066
LINC01893	-0.738134	-0.257403	-2.82422	0.00582558	0.0966706	-2.28415	-2.75744	0.0635346
RC3H2	-0.168437	5.54819	-2.82416	0.00582611	0.0966706	-2.74018	-2.75741	0.0635346
PUM3	-0.537888	8.67019	-2.82296	0.00584357	0.0967169	-2.94863	-2.75643	0.063565
2023-03-03	-0.228121	6.89022	-2.82297	0.00584407	0.0967169	-2.84498	-2.7564	0.063565
AC016027.1	0.540426	0.0138342	2.82272	0.00584838	0.0967169	-2.28045	2.75616	0.063565
LRP2BP	-0.210582	6.66831	-2.82256	0.00585039	0.0967169	-2.8174	-2.75605	0.063565
AC090825.1	-1.18637	0.526436	-2.82196	0.00586031	0.0967919	-2.27637	-2.7555	0.0636143
PHC3	-0.170978	7.77412	-2.82023	0.00589145	0.097217	-2.91584	-2.75376	0.0638938
APBB3	0.31403	2.73343	2.81942	0.00590311	0.0972778	-2.42437	2.75312	0.0639337
ARFGAP1	0.271982	3.86847	2.81929	0.00590594	0.0972778	-2.57036	2.75296	0.0639337
CNGB3	0.196552	10.142	2.81893	0.00591834	0.097284	-3.04569	2.75227	0.0639378
FAM53B	0.292376	4.10083	2.81837	0.00592191	0.097284	-2.6234	2.75207	0.0639378
TYMSOS	-1.05489	0.351215	-2.8185	0.00592566	0.097284	-2.29158	-2.75187	0.0639378
LINC02055	0.815376	1.01647	2.81795	0.00592793	0.097284	-2.30943	2.75174	0.0639378
WBP2	0.256699	5.31194	2.8188	0.00594518	0.0974418	-2.68352	2.75079	0.0640415
SNRPA1	-0.214732	5.2287	-2.81677	0.00594837	0.0974418	-2.6961	-2.75061	0.0640415
BAG3	0.859743	-0.57012	2.81807	0.00596607	0.0975939	-2.32517	2.74964	0.0641414
AL009176.1	0.531206	0.614395	2.81579	0.0059685	0.0975939	-2.296	2.74951	0.0641414
MUSTN1	0.54701	-0.314422	2.81441	0.00599521	0.0978398	-2.32032	2.74804	0.064303
TYMP	-0.527653	0.802005	-2.81379	0.0059998	0.0978398	-2.30138	-2.74779	0.064303
ESRRB	-0.692603	4.4865	-2.81387	0.0060006	0.0978398	-2.62041	-2.74775	0.064303
CYREN	-0.29288	4.04244	-2.81346	0.00600527	0.0978398	-2.60021	-2.74749	0.064303
PPP3CB-AS1	-0.30811	2.85498	-2.81382	0.00601332	0.0978824	-2.42629	-2.74705	0.064331
MCMDC2	0.343564	2.74691	2.81238	0.00602316	0.0979539	-2.4587	2.74652	0.0643781
AC060809.1	0.789164	0.399485	2.81174	0.00603594	0.0980349	-2.30564	2.74582	0.0644313
TLCD2	0.245042	5.33925	2.81147	0.00603903	0.0980349	-2.74483	2.74565	0.0644313
CHST4	-0.325101	2.39077	-2.81074	0.00605462	0.0981231	-2.38205	-2.74481	0.0644893
AC079942.1	0.544074	-0.00856729	2.81145	0.00605575	0.0981231	-2.31342	2.74475	0.0644893
AL121987.2	-0.408082	1.27867	-2.80986	0.00606893	0.0981231	-2.333	-2.74403	0.0644893
NAPEPLD	-0.154585	6.39727	-2.81084	0.00606903	0.0981231	-2.82504	-2.74403	0.0644893
ZBED5	-0.202493	5.01875	-2.81118	0.00607172	0.0981231	-2.71784	-2.74388	0.0644893
AC061958.1	-1.04969	1.25279	-2.80905	0.0060807	0.0981801	-2.31445	-2.7434	0.0645268
SKAP2	0.241505	5.18101	2.80742	0.00610899	0.0982538	-2.76539	2.74187	0.0645752
PSKH2	-0.356586	6.0624	-2.80879	0.00610991	0.0982538	-2.81091	-2.74182	0.0645752
AC015987.1	-0.473744	1.23303	-2.8071	0.00611637	0.0982538	-2.33653	-2.74148	0.0645752
SEPTIN9	0.287206	4.27461	2.80693	0.00611764	0.0982538	-2.66525	2.74141	0.0645752
XKR7	-0.382026	4.05568	-2.80689	0.0061184	0.0982538	-2.55387	-2.74137	0.0645752
EIF4G1	0.21603	3.65218	2.80651	0.006125	0.0982538	-2.58394	2.74101	0.0645752
SH3GLB2	0.303588	2.60585	2.80729	0.00612659	0.0982538	-2.42523	2.74093	0.0645752
AL078602.1	0.486216	4.88086	2.80738	0.00612893	0.0982538	-2.67906	2.7408	0.0645752
AC002377.1	0.24498	3.98364	2.80488	0.00616009	0.0985263	-2.63832	2.73914	0.0647543
POU2AF1	1.57217	3.22692	2.80491	0.00616161	0.0985263	-2.62328	2.73905	0.0647543
GALNT16	0.47942	1.11182	2.80531	0.00616234	0.0985263	-2.34523	2.73902	0.0647543
PSRC1	-0.38207	3.33283	-2.80302	0.00618832	0.0986818	-2.56804	-2.73763	0.0648565
AL161757.4	-0.300926	9.41764	-2.80273	0.00619135	0.0986818	-3.03799	-2.73747	0.0648565
SPINK5	-0.654898	1.05323	-2.80384	0.00619147	0.0986818	-2.32907	-2.73747	0.0648565
ZNF565	-0.217954	6.11219	-2.80273	0.00619399	0.0986818	-2.80546	-2.73733	0.0648565
AL139147.1	-0.447825	5.90172	-2.80194	0.00620563	0.0987799	-2.79924	-2.73671	0.0649209
AC103808.4	-0.73318	0.183314	-2.80213	0.00623701	0.0990747	-2.32885	-2.73505	0.0651147
TCFL5	0.20407	3.46967	2.80013	0.00623734	0.0990747	-2.59879	2.73504	0.0651147
AL031768.2	-0.257659	4.41685	-2.79996	0.00624067	0.0990747	-2.64762	-2.73486	0.0651147
RAB33B	-0.289561	3.70809	-2.80049	0.00625129	0.0991559	-2.56203	-2.7343	0.065168
AL137017.1	-0.94967	0.308491	-2.79806	0.00627419	0.0994316	-2.33107	-2.7331	0.0653493
RASSF4	0.368953	3.53573	2.79831	0.00628397	0.0994551	-2.58219	2.73258	0.0653647
KLC2	0.299925	3.85994	2.79819	0.00628672	0.0994551	-2.58432	2.73244	0.0653647
DBP	0.311138	4.75377	2.79909	0.00630153	0.0996018	-2.67417	2.73166	0.0654611
MOAP1	0.295049	5.03759	2.79952	0.00631032	0.0996532	-2.68892	2.73121	0.0654949
TTC30B	-0.410004	1.925	-2.79419	0.00634937	0.100182	-2.43053	-2.72917	0.0658424
AL160269.1	0.551853	-0.0457477	2.79328	0.00636013	0.10019	-2.34927	2.72861	0.0658474
JPH3	0.234334	4.80229	2.79381	0.00636098	0.10019	-2.7358	2.72857	0.0658474
ENO1	0.552661	6.1248	2.79194	0.0063966	0.100663	-2.80188	2.72673	0.0661583
CCNT1	-0.192292	4.59318	-2.79031	0.00641514	0.100866	-2.72723	-2.72577	0.0662921
LAMC1	0.386623	4.34813	2.78844	0.00644828	0.101282	-2.72339	2.72407	0.0665651
AP003419.3	0.490143	-0.252777	2.78819	0.00645281	0.101282	-2.35236	2.72384	0.0665651
AC020913.1	-0.313836	6.0098	-2.7904	0.00647019	0.101454	-2.82944	-2.72295	0.0666781
NEMP2	-0.533683	1.67444	-2.78626	0.00648818	0.101454	-2.43077	-2.72203	0.0666781
SELENOI	-0.216884	5.57982	-2.78651	0.00648865	0.101454	-2.81119	-2.72201	0.0666781
BARD1	-0.690222	1.27045	-2.78706	0.00649114	0.101454	-2.41881	-2.72188	0.0666781
VMP1	-0.146365	6.82272	-2.78829	0.00649194	0.101454	-2.90589	-2.72184	0.0666781
NPC1	-0.211972	5.76743	-2.78592	0.00649836	0.101466	-2.83882	-2.72151	0.0666862
JPT1	0.342596	3.92148	2.78479	0.00651637	0.101583	-2.60952	2.7206	0.0667632
AC090971.2	-0.325838	3.37754	-2.78753	0.00651818	0.101583	-2.56361	-2.72051	0.0667632
RPE	-0.256061	5.61978	-2.7844	0.00652279	0.101583	-2.84435	-2.72027	0.0667632
AL354740.1	-0.247205	4.54757	-2.78618	0.00654051	0.101771	-2.7033	-2.71938	0.0668867
CPPED1	-0.289745	3.19301	-2.78411	0.00655638	0.10193	-2.56611	-2.71858	0.066991
AC118555.1	-0.357651	3.85174	-2.78426	0.00657025	0.10196	-2.64039	-2.71788	0.0670111
GTPBP8	-0.28973	3.21475	-2.78174	0.00657429	0.10196	-2.60314	-2.71767	0.0670111
RAB39A	0.485519	1.58285	2.78156	0.00657533	0.10196	-2.43382	2.71762	0.0670111
TAC4	-0.382689	3.5738	-2.78071	0.0065911	0.102074	-2.58183	-2.71683	0.0670861
SDC4	0.432385	3.95617	2.7828	0.00659404	0.102074	-2.64226	2.71668	0.0670861
GLRA1	-0.377841	3.08279	-2.77969	0.00661018	0.102153	-2.53588	-2.71587	0.0671381
AC099343.2	0.525416	0.440206	2.78031	0.0066105	0.102153	-2.37665	2.71585	0.0671381
AC108449.1	-0.331554	5.74831	-2.78145	0.00663513	0.10232	-2.8389	-2.71462	0.0672473
AL031658.1	-0.756026	0.778608	-2.77837	0.00663533	0.10232	-2.37832	-2.71461	0.0672473
CERK	0.248733	3.36185	2.77843	0.00663957	0.10232	-2.60675	2.7144	0.0672473
UBAC2-AS1	0.581682	0.311326	2.77797	0.00664398	0.10232	-2.38106	2.71418	0.0672473
ETNK1	-0.160733	7.01861	-2.77756	0.00665031	0.102329	-2.99605	-2.71387	0.0672538
CCDC92	0.164205	5.88115	2.77698	0.00666406	0.102454	-2.88251	2.71318	0.0673354
TMEM260	0.133631	5.5076	2.77537	0.00669158	0.102789	-2.87004	2.71182	0.0675558
HEATR4	-0.237124	4.38188	-2.77498	0.00669915	0.102817	-2.73657	-2.71144	0.0675744
AC008277.1	-0.425558	2.77868	-2.77732	0.00672003	0.102973	-2.55657	-2.71041	0.0676771
SOX5	-1.05289	4.80818	-2.77467	0.00672076	0.102973	-2.69767	-2.71037	0.0676771
AL592295.5	-0.455734	1.31678	-2.77262	0.00674393	0.103157	-2.42007	-2.70923	0.0677977
AL138799.4	-0.839294	1.50418	-2.77261	0.0067442	0.103157	-2.40891	-2.70922	0.0677977
ZNF555	-0.231593	3.33969	-2.77171	0.00681093	0.103861	-2.6069	-2.70595	0.0682607
CDC34	0.261339	3.81518	2.77026	0.00681115	0.103861	-2.6645	2.70594	0.0682607
ACVR1	0.206615	5.09457	2.76906	0.00681219	0.103861	-2.85562	2.70589	0.0682607
VPS37C	0.288806	6.94503	2.76905	0.00681333	0.103861	-2.99704	2.70583	0.0682607
ZNF197	-0.18588	5.69933	-2.76866	0.00682011	0.103877	-2.88977	-2.7055	0.0682708
RNF166	0.345397	2.12671	2.76791	0.00683438	0.10394	-2.51112	2.70481	0.068312
IP6K2	-0.144921	6.18765	-2.76819	0.00684145	0.10394	-2.9211	-2.70446	0.068312
ALDOA	0.503166	2.44251	2.76785	0.00684155	0.10394	-2.48328	2.70446	0.068312
PCGF2	0.228635	3.61878	2.76717	0.00684861	0.103959	-2.67785	2.70412	0.0683248
FMR1	0.159644	4.22798	2.76607	0.00687	0.104151	-2.77669	2.70308	0.0684512
MYO7A	0.230436	5.31228	2.76578	0.00687667	0.104151	-2.88659	2.70276	0.0684512
ACYP2	-0.184225	8.77169	-2.76562	0.00687863	0.104151	-3.10833	-2.70266	0.0684512
CNPY2	-0.264558	5.84877	-2.76414	0.00690787	0.104474	-2.90285	-2.70125	0.0686633
PFKP	0.623325	7.20224	2.76427	0.00691155	0.104474	-3.02881	2.70108	0.0686633
AC092428.1	0.47209	0.45624	2.76301	0.00692962	0.104659	-2.41638	2.70021	0.0687851
TDP1	0.245937	3.32206	2.76214	0.00694714	0.104836	-2.66722	2.69937	0.0689012
PRICKLE2-DT	-0.407186	2.16843	-2.76128	0.00697886	0.105227	-2.5276	-2.69785	0.0691578
AC023389.1	-0.252608	4.57226	-2.76181	0.00699487	0.10538	-2.75845	-2.69709	0.0692585
GABBR2	0.880687	3.37382	2.75853	0.00701779	0.105471	-2.7037	2.696	0.0693185
AL162586.1	0.398217	1.66407	2.75842	0.00702016	0.105471	-2.47923	2.69589	0.0693185
AC024588.1	-0.922984	0.682335	-2.75827	0.00702279	0.105471	-2.45202	-2.69576	0.0693185
ANK2	0.168506	10.2624	2.75808	0.0070308	0.105471	-3.2066	2.69538	0.0693185
AC006504.1	0.463671	0.0191515	2.75775	0.0070372	0.105471	-2.42275	2.69508	0.0693185
DGCR11	0.415103	0.825897	2.75729	0.00704508	0.105471	-2.44868	2.69471	0.0693185
UVRAG-DT	0.677233	-0.3364	2.75734	0.00704524	0.105471	-2.43277	2.6947	0.0693185
AC091978.1	0.245549	3.48147	2.75701	0.0070478	0.105471	-2.69221	2.69458	0.0693185
RNASEH1-AS1	0.331086	2.69815	2.75597	0.00706847	0.105692	-2.58492	2.6936	0.069464
ZNF624	-0.180054	3.38686	-2.75604	0.00708359	0.105831	-2.66549	-2.69289	0.0695548
ZNF706	0.209777	5.22733	2.75451	0.00713647	0.106343	-2.86966	2.69041	0.0698915
BX842242.1	0.450616	0.664546	2.75208	0.0071464	0.106343	-2.45062	2.68994	0.0698915
AC069277.1	-0.933267	-1.157	-2.75211	0.00715101	0.106343	-2.4759	-2.68973	0.0698915
ORMDL3	0.398464	2.13956	2.75168	0.00715452	0.106343	-2.51842	2.68957	0.0698915
AC073365.1	-0.593402	3.29491	-2.75213	0.00715491	0.106343	-2.60284	-2.68955	0.0698915
SSH1	0.16375	5.25684	2.75185	0.00716073	0.106343	-2.89547	2.68928	0.0698915
PEX1	-0.205424	5.86688	-2.7532	0.0071672	0.106343	-2.93866	-2.68897	0.0698915
ZNF502	-0.275445	3.42064	-2.74986	0.00719122	0.106343	-2.69521	-2.68786	0.0698915
AC096536.3	-0.939244	-0.985778	-2.75033	0.00719347	0.106343	-2.48448	-2.68775	0.0698915
XRRA1	-0.204548	7.53652	-2.74979	0.00719479	0.106343	-3.06814	-2.68769	0.0698915
ACSM6	-0.369501	4.969	-2.75096	0.0071984	0.106343	-2.83861	-2.68752	0.0698915
YRDC	-0.422	1.79362	-2.7497	0.00719897	0.106343	-2.49015	-2.6875	0.0698915
PHF3	-0.142956	7.10984	-2.75132	0.00720031	0.106343	-3.03845	-2.68744	0.0698915
GMEB2	-0.193057	2.94319	-2.74994	0.00720678	0.106343	-2.60544	-2.68714	0.0698915
MDGA1	0.305468	5.64153	2.74888	0.00721897	0.106343	-2.94119	2.68657	0.0698915
FAM104A	-0.209135	4.5466	-2.74929	0.00723601	0.106343	-2.8032	-2.68578	0.0698915
AC010336.8	-0.425837	1.34013	-2.74753	0.00723876	0.106343	-2.46445	-2.68566	0.0698915
DNASE1	0.16351	5.03697	2.74701	0.00724898	0.106343	-2.87231	2.68518	0.0698915
TMEM108-AS1	-0.373729	3.75241	-2.75029	0.00725024	0.106343	-2.7614	-2.68513	0.0698915
ZFYVE19	0.252703	3.58561	2.74716	0.00725707	0.106343	-2.71371	2.68481	0.0698915
RIIAD1	0.208336	5.79285	2.74742	0.00726086	0.106343	-2.9377	2.68464	0.0698915
ATP6V0C	0.448492	6.13297	2.74904	0.00726522	0.106343	-2.91671	2.68444	0.0698915
MYOM1	0.341771	4.63025	2.74797	0.00726609	0.106343	-2.84987	2.6844	0.0698915
TTC3-AS1	-0.315896	4.42511	-2.74713	0.00726691	0.106343	-2.77489	-2.68436	0.0698915
SYT14	-0.127644	7.38534	-2.74696	0.00727428	0.106343	-3.06716	-2.68402	0.0698915
ARVCF	0.324157	2.36231	2.7457	0.00727584	0.106343	-2.58495	2.68395	0.0698915
AC013652.1	-0.426187	3.91698	-2.74569	0.00727737	0.106343	-2.77849	-2.68388	0.0698915
CFAP53	0.283475	3.74626	2.74595	0.00728735	0.106402	-2.72314	2.68342	0.0699306
AP000857.2	-0.32662	6.47683	-2.74616	0.00730531	0.106578	-2.99437	-2.6826	0.0700462
LRRC27	0.180107	4.74179	2.7431	0.00733065	0.106802	-2.85943	2.68144	0.0701933
GEMIN4	0.5121	0.0393087	2.74261	0.0073393	0.106802	-2.45428	2.68104	0.0701933
PGAM1	0.438555	6.82482	2.74385	0.00734954	0.106802	-3.00283	2.68058	0.0701933
AP000676.5	-0.520384	2.25246	-2.74231	0.00735572	0.106802	-2.65351	-2.6803	0.0701933
LMF1	0.200642	4.46443	2.74176	0.00735876	0.106802	-2.82831	2.68016	0.0701933
DVL1	0.315008	2.78124	2.74133	0.00736569	0.106802	-2.64998	2.67984	0.0701933
LINC02175	0.290098	4.13223	2.74039	0.00738679	0.106802	-2.79679	2.67888	0.0701933
AL138760.1	-0.391537	3.67512	-2.74381	0.00738685	0.106802	-2.74792	-2.67888	0.0701933
AC117383.1	-0.310402	2.69045	-2.74027	0.00738753	0.106802	-2.65178	-2.67885	0.0701933
ADORA2A	0.470698	2.60217	2.74024	0.0073883	0.106802	-2.62409	2.67882	0.0701933
TMEM126B	-0.231207	4.61841	-2.74092	0.00739788	0.106802	-2.81641	-2.67838	0.0701933
FAM8A1	0.261994	3.49051	2.74199	0.00740466	0.106802	-2.70742	2.67807	0.0701933
RNF157	0.178596	7.56511	2.74069	0.00740511	0.106802	-3.08849	2.67805	0.0701933
AC007262.2	0.397493	4.39534	2.73922	0.00740947	0.106802	-2.88959	2.67786	0.0701933
GIHCG	-0.293198	4.02711	-2.74074	0.00741033	0.106802	-2.74124	-2.67782	0.0701933
TOP1	0.147303	6.77052	2.7392	0.00741558	0.106802	-3.04494	2.67758	0.0701933
AL627171.2	0.602332	1.37576	2.73804	0.00743672	0.106908	-2.49411	2.67663	0.0702631
AC127024.2	0.338774	2.91419	2.73806	0.00743936	0.106908	-2.65375	2.67651	0.0702631
ACO2	-0.15242	6.5294	-2.73859	0.00744332	0.106908	-3.00812	-2.67633	0.0702631
TAPT1-AS1	0.267357	6.50739	2.73748	0.0074467	0.106908	-3.05073	2.67618	0.0702631
RPS9	0.479481	5.79769	2.73977	0.00746452	0.107079	-2.91465	2.67538	0.0703751
GPI	0.459864	7.63362	2.73575	0.00748183	0.107241	-3.13199	2.6746	0.0704821
SLC25A29	0.306737	6.9634	2.73495	0.00749882	0.107338	-3.07739	2.67384	0.0705454
AP001972.4	-0.580286	0.960394	-2.73486	0.00750047	0.107338	-2.50896	-2.67377	0.0705454
ARL6IP5	0.295167	6.97223	2.73753	0.00750723	0.107349	-3.0344	2.67346	0.0705529
PSPH	0.369046	2.18185	2.73422	0.00751591	0.107388	-2.56509	2.67308	0.0705785
TTI1	0.160267	4.53562	2.73565	0.00752747	0.107468	-2.84756	2.67256	0.0706309
ABLIM2	0.366909	3.59482	2.73289	0.00754716	0.107651	-2.74629	2.67168	0.070751
HSPBP1	0.318053	2.96273	2.73244	0.00755223	0.107651	-2.66117	2.67146	0.070751
CSPG5	0.218603	3.56051	2.73137	0.00758355	0.107934	-2.74516	2.67007	0.0709372
AL353152.2	0.853909	-0.286295	2.73069	0.00758899	0.107934	-2.48056	2.66983	0.0709372
UBE2D2	-0.135208	6.63198	-2.73114	0.00760011	0.107934	-3.03946	-2.66934	0.0709372
AC004672.1	-0.524071	0.538415	-2.73008	0.0076018	0.107934	-2.48808	-2.66926	0.0709372
PPDPF	0.50841	3.38633	2.73152	0.00760776	0.107934	-2.64645	2.669	0.0709372
VPS11	-0.255934	3.1448	-2.72988	0.00760807	0.107934	-2.70327	-2.66899	0.0709372
DENND4B	0.301569	4.15596	2.72947	0.00761465	0.107942	-2.8382	2.6687	0.0709426
SELENOK	0.469548	5.73054	2.73164	0.00762282	0.107973	-2.93363	2.66833	0.0709629
NCOA7-AS1	-0.376162	2.06733	-2.7283	0.00764601	0.108216	-2.59158	-2.66731	0.0711228
FAXC	0.156059	5.42838	2.72765	0.00765793	0.108223	-2.97299	2.66679	0.0711272
KLF16	0.360684	3.62966	2.72742	0.00765851	0.108223	-2.77575	2.66677	0.0711272
TRAC	0.293659	4.76848	2.72798	0.00766862	0.108281	-2.8786	2.66632	0.0711653
LAMB2	0.825812	-0.64747	2.72655	0.00768283	0.108397	-2.5065	2.6657	0.0712413
NPEPL1	-0.292126	3.53339	-2.72606	0.00769562	0.10843	-2.73659	-2.66514	0.0712633
AGAP5	0.21257	3.63069	2.72563	0.00769725	0.10843	-2.78146	2.66507	0.0712633
DIPK1A	-0.196124	6.42908	-2.72611	0.00770481	0.108452	-3.05415	-2.66474	0.0712775
AL356379.2	-0.624046	0.336564	-2.72482	0.00771444	0.108502	-2.49273	-2.66432	0.0713109
ARL1	0.309286	4.4908	2.72507	0.00774452	0.10884	-2.84583	2.66301	0.071533
AC012146.1	0.667751	0.114192	2.7233	0.00775513	0.108905	-2.50331	2.66255	0.0715752
SREK1	-0.130145	6.52067	-2.7228	0.00777969	0.109094	-3.07196	-2.66148	0.0716994
AP000779.1	-0.345575	6.14049	-2.72436	0.00778199	0.109094	-3.02145	-2.66139	0.0716994
AC046158.1	-0.489113	3.44967	-2.72258	0.00778678	0.109094	-2.74101	-2.66118	0.0716994
MITF	0.365911	4.29545	2.72082	0.00780104	0.109209	-2.92006	2.66056	0.0717749
GTF2H1	-0.183231	5.01177	-2.71975	0.00782644	0.109479	-2.93872	-2.65947	0.0719526
FANCM	-0.371557	3.61819	-2.71929	0.00783442	0.109505	-2.81204	-2.65912	0.07197
AC019077.1	0.307715	3.81327	2.71913	0.00784291	0.109539	-2.83348	2.65876	0.0719922
CLN6	0.211695	4.11755	2.71838	0.00786349	0.109716	-2.85712	2.65788	0.0721083
AC002463.1	-0.3271	6.64111	-2.71932	0.00786775	0.109716	-3.05857	-2.65769	0.0721083
NAALADL2-AS2	-0.422071	1.41076	-2.71781	0.00787662	0.109755	-2.55301	-2.65731	0.0721338
B3GNT5	-0.290436	6.46438	-2.71871	0.00789249	0.109864	-3.06923	-2.65663	0.072206
CLEC4D	0.712043	-0.383944	2.71631	0.00789997	0.109864	-2.51309	2.65632	0.072206
TUBGCP4	-0.199901	4.81418	-2.71622	0.00790282	0.109864	-2.92685	-2.65619	0.072206
AC015802.4	0.394724	1.98494	2.71597	0.00792372	0.109994	-2.60947	2.6553	0.072291
SMU1	-0.159721	5.30207	-2.71525	0.00792434	0.109994	-2.97296	-2.65528	0.072291
AC008119.1	-0.307429	3.56586	-2.71741	0.00794056	0.110134	-2.7824	-2.65459	0.0723831
UBE2Q1	0.352262	2.43412	2.71411	0.00795081	0.110191	-2.67419	2.65415	0.0724208
IGFL2	0.563657	-0.0432794	2.71356	0.00796092	0.110246	-2.52137	2.65372	0.0724571
Z99496.2	-0.423823	1.84056	-2.71217	0.00799289	0.110604	-2.60448	-2.65237	0.0726921
ZUP1	-0.160822	4.92437	-2.71157	0.008005	0.110604	-2.97147	-2.65186	0.0726921
AL137100.3	-0.509513	6.8297	-2.71161	0.00800517	0.110604	-3.10441	-2.65185	0.0726921
RNF17	-1.02693	-1.20114	-2.7118	0.00801141	0.110605	-2.55384	-2.65159	0.072693
CRX	0.22325	8.33221	2.71094	0.00802023	0.110615	-3.22809	2.65122	0.0726991
USP53	0.168356	5.63915	2.7109	0.00802438	0.110615	-3.03519	2.65104	0.0726991
DCLK2	-0.460968	5.12963	-2.71144	0.00803748	0.110711	-2.99517	-2.65049	0.0727621
TMED9	0.417573	4.07659	2.71071	0.00805887	0.11092	-2.82032	2.64959	0.0729
REEP3	-0.16215	6.99129	-2.70901	0.0080703	0.110993	-3.12542	-2.64911	0.0729476
FGF1	-0.465518	8.62813	-2.70816	0.00808144	0.111061	-3.23274	-2.64865	0.0729926
SCAF1	0.242894	3.36276	2.70796	0.0080885	0.11107	-2.77167	2.64835	0.0729982
AL137802.2	-0.45877	1.57916	-2.70759	0.00809441	0.11107	-2.55292	-2.64811	0.0729982
RPL36	0.503421	5.07038	2.70972	0.00811002	0.111199	-2.91653	2.64745	0.0730834
NAGLU	-0.374258	2.41489	-2.70681	0.00811896	0.111237	-2.67335	-2.64708	0.0731082
UGDH	0.220758	4.81601	2.70702	0.00813198	0.111331	-2.95253	2.64654	0.0731697
LMOD1	0.200518	8.30705	2.70638	0.00813985	0.111354	-3.22822	2.64621	0.0731849
SERPINB9P1	-0.781272	1.5751	-2.70523	0.00815172	0.111432	-2.56978	-2.64572	0.073236
RNF122	0.450659	3.0681	2.70454	0.00816336	0.111506	-2.75228	2.64524	0.0732849
OSGEP	-0.261578	5.19199	-2.70417	0.00817374	0.111563	-2.99261	-2.64481	0.0733225
FBXO31	0.276333	7.33543	2.70362	0.00818431	0.111623	-3.18237	2.64437	0.0733616
GPR155	-0.16203	6.78128	-2.70235	0.00821309	0.111679	-3.15487	-2.64318	0.0733988
CCN5	-0.890807	-0.600307	-2.7021	0.00821884	0.111679	-2.55121	-2.64294	0.0733988
LUC7L	-0.201139	6.83071	-2.70282	0.0082224	0.111679	-3.13138	-2.6428	0.0733988
CREB1	0.118957	6.7479	2.70218	0.00822525	0.111679	-3.15327	2.64268	0.0733988
LINC01135	0.383473	4.78608	2.70145	0.0082338	0.111679	-3.00261	2.64233	0.0733988
SDHD	-0.22015	4.26283	-2.70189	0.00823399	0.111679	-2.8935	-2.64232	0.0733988
GLB1L2	0.323194	4.59727	2.7014	0.00823493	0.111679	-2.96817	2.64228	0.0733988
AC024270.5	0.308322	3.43803	2.70265	0.00823808	0.111679	-2.8095	2.64215	0.0733988
CBR4	0.126465	6.6762	2.70078	0.00824903	0.111744	-3.16273	2.6417	0.0734411
ZNF676	0.916513	-0.807658	2.69963	0.00827555	0.112014	-2.56826	2.64062	0.073619
VDAC1	0.412147	6.33635	2.70114	0.00828146	0.112014	-3.05902	2.64037	0.073619
CNKSR1	0.563031	0.0322969	2.69893	0.00829162	0.112068	-2.55136	2.63996	0.0736539
AC006157.1	0.804957	-0.0616883	2.69765	0.00832195	0.112297	-2.58542	2.63872	0.0738047
ABCG5	-0.518448	1.26758	-2.69716	0.00833247	0.112297	-2.58761	-2.63829	0.0738047
AC013731.1	0.551821	0.816542	2.69724	0.00834058	0.112297	-2.56613	2.63796	0.0738047
RPP38	0.226713	4.78044	2.69763	0.00834281	0.112297	-2.97326	2.63787	0.0738047
ZNF7	-0.207143	4.25425	-2.69644	0.00834906	0.112297	-2.90383	-2.63762	0.0738047
CSTF2	-0.270498	2.82731	-2.69774	0.0083493	0.112297	-2.72958	-2.63761	0.0738047
AQP1	-0.79341	-0.0219043	-2.69676	0.00835226	0.112297	-2.55812	-2.63749	0.0738047
SAXO2	0.192011	4.4205	2.69521	0.00837838	0.112541	-2.94845	2.63643	0.0739654
ARNT	-0.139582	6.94046	-2.69499	0.00838294	0.112541	-3.17356	-2.63624	0.0739654
AC005225.2	-0.285425	4.39233	-2.69426	0.00839983	0.112684	-2.91372	-2.63556	0.0740592
BGLAP	0.441827	0.812833	2.69383	0.00841024	0.11274	-2.58352	2.63514	0.0740957
IQSEC2	0.686309	0.42652	2.69368	0.00843762	0.113023	-2.56225	2.63404	0.0742817
AC090241.2	-0.361152	2.01449	-2.69321	0.00844984	0.113097	-2.65298	-2.63355	0.0743305
SLC66A2	0.22284	6.99049	2.69197	0.00845573	0.113097	-3.18519	2.63331	0.0743305
Z99127.1	-0.268864	3.72265	-2.69278	0.00846745	0.11317	-2.82142	-2.63284	0.0743783
COMMD2	-0.274511	5.85242	-2.69129	0.00848272	0.11329	-3.06925	-2.63223	0.0744571
HEXIM2	-0.381939	2.79567	-2.69011	0.00849709	0.113397	-2.73077	-2.63165	0.0745279
GUCY1A1	0.783385	2.0907	2.69004	0.00852246	0.113509	-2.72006	2.63064	0.0746016
DROSHA	0.122999	6.17545	2.68907	0.00852426	0.113509	-3.14896	2.63057	0.0746016
RNF111	-0.141796	7.47715	-2.68999	0.00853107	0.113509	-3.20762	-2.6303	0.0746016
AL022397.1	-0.509054	0.676991	-2.69137	0.00853216	0.113509	-2.59736	-2.63025	0.0746016
ABCF3	-0.24007	3.45709	-2.68913	0.00854131	0.113509	-2.82611	-2.62989	0.0746016
AC069228.1	-0.22407	9.12615	-2.68918	0.00854331	0.113509	-3.30122	-2.62981	0.0746016
SLK	0.172287	5.28203	2.68768	0.00855452	0.11355	-3.07744	2.62936	0.074628
SNX1	-0.142195	5.91095	-2.68803	0.00856122	0.11355	-3.09669	-2.6291	0.074628
INO80-AS1	-0.350672	3.30562	-2.6888	0.00856526	0.11355	-2.803	-2.62894	0.074628
ERBB3	-0.573607	-0.112646	-2.68633	0.00858641	0.113666	-2.57839	-2.6281	0.0747043
CASTOR3	0.226909	5.78197	2.68636	0.00858664	0.113666	-3.10862	2.62809	0.0747043
AC018695.9	-0.348579	6.21507	-2.68471	0.00862546	0.114073	-3.12243	-2.62655	0.0749718
PWWP2B	0.384606	1.37054	2.68456	0.00863006	0.114073	-2.634	2.62637	0.0749718
MSH4	0.776758	1.7511	2.68314	0.00866457	0.114354	-2.69847	2.62501	0.0751568
YIPF2	-0.218124	4.41979	-2.68394	0.00867039	0.114354	-2.93574	-2.62478	0.0751568
API5	-0.142767	5.15744	-2.68292	0.00867042	0.114354	-3.0594	-2.62478	0.0751568
GOLGA6L10	0.50664	2.0382	2.68382	0.00869838	0.114584	-2.71559	2.62369	0.0753075
RBM26-AS1	0.432583	2.09337	2.68154	0.00870119	0.114584	-2.68597	2.62358	0.0753075
GALNS	0.25549	2.88031	2.68159	0.0087069	0.114584	-2.77821	2.62335	0.0753075
RNFT1	-0.319208	5.33655	-2.68154	0.00871329	0.114584	-3.06534	-2.6231	0.0753077
AL354707.1	0.367355	3.02169	2.68176	0.00874389	0.114902	-2.75842	2.62191	0.0755171
TBXAS1	0.298162	5.78395	2.67936	0.00875358	0.114946	-3.14099	2.62153	0.0755456
TTC9	-0.865647	3.57173	-2.67885	0.00877386	0.114988	-2.82182	-2.62074	0.0755736
AC018754.1	-0.646803	0.541784	-2.67878	0.0087754	0.114988	-2.59593	-2.62068	0.0755736
LINC02362	-0.332959	1.8449	-2.67889	0.0087773	0.114988	-2.66025	-2.62061	0.0755736
TUBB6	-0.385244	2.17245	-2.67791	0.00878882	0.114988	-2.7205	-2.62016	0.0755736
PLA2G6	0.208524	4.0024	2.6776	0.00879665	0.114988	-2.92722	2.61986	0.0755736
METTL14	-0.137751	5.07666	-2.67747	0.00879989	0.114988	-3.07148	-2.61973	0.0755736
AC005740.3	-0.526953	1.70386	-2.67915	0.0088111	0.114988	-2.66418	-2.6193	0.0755736
TMEM14B	-0.29314	9.14554	-2.67773	0.00881317	0.114988	-3.31759	-2.61922	0.0755736
SELENOP	-0.976597	0.386518	-2.6784	0.00881491	0.114988	-2.59872	-2.61915	0.0755736
DNMBP-AS1	-0.255845	4.72243	-2.67782	0.00882963	0.114988	-3.01144	-2.61858	0.0755736
AL122035.1	-0.299942	4.33392	-2.67622	0.00882995	0.114988	-2.95352	-2.61857	0.0755736
GLYR1	-0.136385	6.57775	-2.6766	0.00884459	0.114988	-3.17437	-2.618	0.0755736
NOC4L	0.416345	1.36832	2.67529	0.00885278	0.114988	-2.63763	2.61769	0.0755736
AL162431.1	0.417612	2.19255	2.67582	0.00885613	0.114988	-2.7366	2.61756	0.0755736
B4GALNT4	0.712229	1.69672	2.67482	0.00886409	0.114988	-2.67588	2.61725	0.0755736
AC018462.1	-0.252313	5.011	-2.67651	0.00886819	0.114988	-3.02784	-2.61709	0.0755736
AC104316.1	-0.260589	4.27071	-2.67441	0.00887444	0.114988	-2.948	-2.61685	0.0755736
ZKSCAN2-DT	0.306682	3.67022	2.6743	0.00887693	0.114988	-2.90022	2.61676	0.0755736
ZNF880	0.308202	3.66873	2.67409	0.00888315	0.114988	-2.91467	2.61652	0.0755736
LUC7L2	-0.14184	7.15242	-2.67629	0.00888666	0.114988	-3.20315	-2.61638	0.0755736
AC012085.2	-0.289039	6.24738	-2.67635	0.00889095	0.114988	-3.15159	-2.61622	0.0755736
AL139120.1	-0.429545	0.815594	-2.67604	0.00891748	0.115249	-2.62705	-2.6152	0.0757447
IGSF9B	0.61042	2.93263	2.6725	0.0089263	0.11528	-2.83843	2.61486	0.0757652
TRAK1	0.135946	7.86326	2.67105	0.00896764	0.115731	-3.29	2.61329	0.0760615
TUT4	-0.118232	8.97114	-2.67006	0.00898878	0.11592	-3.35412	-2.61248	0.0761862
ARHGEF10	0.481035	4.09634	2.6695	0.00899522	0.11592	-2.97137	2.61224	0.0761862
SRSF4	-0.11693	7.04117	-2.66956	0.00901417	0.116082	-3.22082	-2.61152	0.0762921
PTPN3	-1.14915	-0.542769	-2.66796	0.00904111	0.116181	-2.64635	-2.6105	0.0763577
AP003059.1	-1.12952	-0.618875	-2.66764	0.00904153	0.116181	-2.62834	-2.61048	0.0763577
SNRNP25	0.455896	1.81437	2.66882	0.00904225	0.116181	-2.66465	2.61045	0.0763577
XXYLT1	0.234506	4.30154	2.66888	0.00904773	0.116181	-2.98619	2.61025	0.0763577
SLC25A16	-0.171441	6.49824	-2.66629	0.00907538	0.116453	-3.20632	-2.6092	0.0765365
RAI14	-0.291339	7.75184	-2.66509	0.00914015	0.117201	-3.29405	-2.60677	0.0770277
STYXL1	0.30955	4.43537	2.66308	0.0091559	0.117319	-2.99805	2.60618	0.0771056
EDEM2	0.193706	3.856	2.66278	0.0091675	0.117384	-2.96272	2.60574	0.0771483
NEURL2	-0.240414	3.04165	-2.66217	0.00917978	0.11742	-2.79536	-2.60529	0.0771718
AC006355.2	-0.305858	4.31964	-2.66199	0.00918333	0.11742	-2.99468	-2.60515	0.0771718
DENND6A-AS1	-0.207932	4.93051	-2.66286	0.00919736	0.117516	-3.05563	-2.60463	0.0772348
DHRS7B	-0.203727	4.86083	-2.66031	0.00922773	0.117794	-3.06003	-2.6035	0.0774178
PSG4	0.734721	1.33065	2.65976	0.00923972	0.117794	-2.67501	2.60305	0.0774178
WWC3-AS1	-0.577072	1.04884	-2.66004	0.00924007	0.117794	-2.66174	-2.60304	0.0774178
ZNF71	-0.24927	2.51933	-2.65959	0.00924532	0.117794	-2.78065	-2.60285	0.0774178
SMG1	0.146669	6.19625	2.65914	0.00925554	0.117841	-3.24077	2.60247	0.0774485
TBC1D9	-0.285078	3.6298	-2.65858	0.00927867	0.118049	-2.94371	-2.60161	0.0775853
AC024475.3	0.596618	0.027968	2.658	0.009285	0.118049	-2.64079	2.60138	0.0775853
SH3D21	0.881745	3.65828	2.65696	0.00933285	0.118427	-2.92589	2.59961	0.0778334
AC010547.3	-0.466641	1.45582	-2.65591	0.00933953	0.118427	-2.67618	-2.59937	0.0778334
AC019080.5	-0.524416	-0.12964	-2.65581	0.00934077	0.118427	-2.64074	-2.59932	0.0778334
HPRT1	0.235474	5.55399	2.6559	0.00934608	0.118427	-3.13838	2.59913	0.0778334
METTL17	-0.186458	4.72757	-2.65659	0.00935298	0.118427	-3.04503	-2.59888	0.0778334
CPNE6	0.823177	0.189324	2.65509	0.00935925	0.118427	-2.6469	2.59864	0.0778334
SEMA6A-AS1	0.237458	4.27438	2.65561	0.00936073	0.118427	-3.01789	2.59859	0.0778334
LATS1	-0.133886	6.16294	-2.65441	0.00939819	0.118817	-3.2111	-2.59722	0.07809
PRSS51	-0.537124	3.5166	-2.65274	0.00941984	0.119007	-2.99805	-2.59643	0.0782149
PCDH19	0.427944	1.183	2.65215	0.00943493	0.119114	-2.68862	2.59588	0.0782853
KLF7	0.420025	3.34815	2.65176	0.00944659	0.119125	-2.91591	2.59545	0.0782923
AL360270.1	-0.479254	1.36265	-2.65248	0.009449	0.119125	-2.7098	-2.59537	0.0782923
PIPOX	-0.22952	3.81926	-2.64998	0.009493	0.119448	-2.96309	-2.59377	0.0785047
RAB41	0.282941	8.29867	2.6499	0.00949408	0.119448	-3.386	2.59373	0.0785047
HMGB1	0.169919	7.28692	2.6514	0.00949455	0.119448	-3.2797	2.59371	0.0785047
PLXNB2	0.437757	1.72247	2.6482	0.00953787	0.119868	-2.75271	2.59215	0.0787806
AC108199.1	0.589709	2.58935	2.6488	0.00954123	0.119868	-2.81164	2.59203	0.0787806
AL132656.2	-0.62082	-0.491669	-2.64851	0.00954926	0.119885	-2.6666	-2.59174	0.0787919
XRCC1	-0.205436	4.13093	-2.64846	0.00957931	0.120153	-2.97038	-2.59066	0.078968
EMC1	-0.194062	3.93347	-2.64653	0.00958428	0.120153	-3.00241	-2.59048	0.078968
DST	0.195863	10.6695	2.64637	0.00959062	0.120153	-3.50652	2.59025	0.078968
PLD6	0.488056	0.71075	2.64544	0.00961029	0.120316	-2.69271	2.58954	0.0790749
YTHDF1	0.18872	4.0049	2.64498	0.00962232	0.120341	-3.03791	2.58911	0.0790916
AC034139.1	-0.34856	3.50734	-2.64486	0.00962569	0.120341	-2.93088	-2.58899	0.0790916
AC068282.1	-0.28346	6.80289	-2.64471	0.0096344	0.120366	-3.2597	-2.58868	0.0791082
ESPN	0.201787	6.99957	2.64444	0.00964589	0.12038	-3.29693	2.58827	0.0791173
SNX10	0.243815	4.51061	2.64402	0.00966081	0.12038	-3.05797	2.58774	0.0791173
TATDN3	-0.163757	5.28295	-2.64375	0.00966217	0.12038	-3.14785	-2.58769	0.0791173
CYSTM1	-0.255823	5.68806	-2.64344	0.00966522	0.12038	-3.18272	-2.58758	0.0791173
RASSF8-AS1	0.156373	5.78096	2.6433	0.00967283	0.12038	-3.19282	2.58731	0.0791173
C21orf91	-0.276827	4.12826	-2.64267	0.0096835	0.12038	-3.05266	-2.58693	0.0791173
COQ10A	-0.288412	4.79529	-2.64391	0.00969355	0.12038	-3.09517	-2.58657	0.0791173
BAIAP2-DT	0.439996	1.66762	2.6436	0.00969398	0.12038	-2.73376	2.58656	0.0791173
HES6	-0.496559	2.96548	-2.64325	0.0096984	0.12038	-2.88323	-2.5864	0.0791173
KLF10	0.964898	-0.647918	2.64216	0.00970237	0.12038	-2.67846	2.58626	0.0791173
AC025188.1	-0.328692	3.56153	-2.6436	0.00971355	0.120399	-2.94753	-2.58586	0.0791296
ARG2	-0.218631	5.72626	-2.64294	0.00971726	0.120399	-3.17056	-2.58573	0.0791296
CENPE	0.438662	1.34556	2.63643	0.00985021	0.121962	-2.72695	2.58104	0.0801572
C6orf201	-0.456072	0.650366	-2.63662	0.00986165	0.12202	-2.70168	-2.58064	0.0801951
APEX1	-0.350265	4.60853	-2.63542	0.00987753	0.122056	-3.08436	-2.58009	0.0802184
KLHL28	-0.235938	6.95085	-2.63713	0.00987808	0.122056	-3.30382	-2.58007	0.0802184
AC007533.1	-0.316552	4.04087	-2.63583	0.00991493	0.122363	-2.98935	-2.57878	0.0804205
UBE2QL1	0.339071	4.81559	2.63398	0.00991656	0.122363	-3.17576	2.57873	0.0804205
DIXDC1	0.219191	7.85284	2.63321	0.00993821	0.122546	-3.40066	2.57797	0.0805409
LINC01266	0.243059	6.15043	2.63198	0.00997635	0.122875	-3.29671	2.57665	0.0807571
AP003721.2	-1.11573	1.96592	-2.63166	0.00997962	0.122875	-2.72532	-2.57653	0.0807571
ZNF155	-0.213195	4.44793	-2.63154	0.00998631	0.122875	-3.12879	-2.5763	0.0807571
ELMO1	-0.414039	4.18503	-2.6315	0.00999384	0.122875	-3.04707	-2.57604	0.0807571
MED6	-0.187936	5.61305	-2.63113	0.0100004	0.122875	-3.18805	-2.57581	0.0807571
ZNF124	-0.259083	4.35589	-2.63073	0.0100104	0.122875	-3.10557	-2.57547	0.0807571
AC034231.1	0.61449	0.223231	2.63045	0.0100127	0.122875	-2.70018	2.57539	0.0807571
LRRIQ3	0.409865	3.55342	2.62975	0.0100318	0.123026	-3.02702	2.57473	0.0808561
RASAL2	-0.139712	9.78391	-2.63015	0.0100503	0.123169	-3.48658	-2.57409	0.0809503
SETD1A	-0.27486	3.0392	-2.62995	0.0100787	0.123433	-2.92533	-2.57312	0.0811234
BRIX1	-0.353282	3.57193	-2.62755	0.0100922	0.123471	-2.978	-2.57265	0.0811485
AC007823.1	0.502631	-0.122823	2.62732	0.0100985	0.123471	-2.70476	2.57244	0.0811485
ATP6V0E2	0.245376	5.43374	2.62981	0.0101023	0.123471	-3.16678	2.57231	0.0811485
SLIRP	-0.192012	6.51255	-2.62755	0.0101171	0.123567	-3.27793	-2.5718	0.081212
AC019068.1	-1.0816	0.628255	-2.62619	0.0101314	0.123648	-2.70705	-2.57131	0.0812651
OGFRP1	-0.343965	3.21747	-2.62598	0.0101375	0.123648	-2.90966	-2.5711	0.0812651
AL136979.1	-0.3008	2.51453	-2.62517	0.0101777	0.124012	-2.87114	-2.56973	0.0815042
AL138831.1	0.546471	2.79625	2.62444	0.0101811	0.124012	-2.82586	2.56962	0.0815042
LPP	-0.318108	7.32457	-2.62352	0.0102036	0.124203	-3.38626	-2.56885	0.0816295
ZKSCAN4	-0.362607	2.17822	-2.62259	0.0102317	0.124461	-2.8425	-2.5679	0.0817992
EVI2A	-0.461548	0.400789	-2.62493	0.0102496	0.124519	-2.72897	-2.56729	0.0818374
AC093849.4	0.327129	3.26153	2.62208	0.0102504	0.124519	-2.98885	2.56727	0.0818374
AC090772.1	-0.366764	3.09707	-2.62172	0.0102575	0.124521	-2.91115	-2.56703	0.0818388
ZNF41	-0.193333	4.27806	-2.62121	0.0102711	0.124579	-3.10337	-2.56656	0.0818766
ZNF649-AS1	-0.397716	1.41827	-2.62093	0.010276	0.124579	-2.76398	-2.5664	0.0818766
LINC00623	-0.532685	1.25527	-2.62088	0.0102927	0.124697	-2.74568	-2.56584	0.0819541
ACOT1	-0.489104	1.00825	-2.6195	0.0103188	0.124775	-2.74149	-2.56496	0.0820059
AC144521.1	0.329462	1.66806	2.61974	0.0103196	0.124775	-2.82331	2.56493	0.0820059
BCL2L14	-0.31686	5.56153	-2.6205	0.0103247	0.124775	-3.22787	-2.56476	0.0820059
MRPL23	0.523677	1.4352	2.622	0.0103299	0.124775	-2.73018	2.56458	0.0820059
RAB11B	0.28235	3.82921	2.62047	0.0103338	0.124775	-2.99057	2.56445	0.0820059
GEMIN7	0.378598	1.42788	2.61839	0.0103479	0.124862	-2.78279	2.56398	0.0820627
BUB3	0.25356	3.62746	2.61737	0.0103762	0.125111	-3.0249	2.56303	0.0822268
PDE6B	-0.343252	6.87523	-2.61677	0.0103943	0.125111	-3.34522	-2.56243	0.0822268
PHF19	0.264985	4.17695	2.6167	0.0103954	0.125111	-3.11515	2.56239	0.0822268
SP110	-0.525972	3.64419	-2.61646	0.0104019	0.125111	-2.98399	-2.56217	0.0822268
EPN2	0.171545	6.30339	2.6162	0.0104128	0.125111	-3.3261	2.56181	0.0822268
COL4A3	-0.289507	10.0131	-2.61642	0.0104155	0.125111	-3.52475	-2.56172	0.0822268
PRKCD	-0.900528	-0.991308	-2.61609	0.0104173	0.125111	-2.75363	-2.56166	0.0822268
TENT5A	-0.337603	3.9764	-2.61487	0.0104467	0.125381	-3.04518	-2.56068	0.0824039
MXRA7	0.272412	6.72028	2.61425	0.0104643	0.125509	-3.36512	2.5601	0.0824879
CWC25	-0.264904	6.12631	-2.61459	0.0104776	0.125525	-3.26854	-2.55966	0.0824982
AC009403.2	0.696684	1.55446	2.61371	0.0104795	0.125525	-2.80245	2.55959	0.0824982
AC007014.1	-0.248035	5.43542	-2.61482	0.0105018	0.125707	-3.21612	-2.55885	0.0826183
AC025178.1	-0.292492	2.26271	-2.61223	0.010522	0.125865	-2.89206	-2.55819	0.0827223
PLAGL2	-0.178205	4.38522	-2.61268	0.0105653	0.126286	-3.10742	-2.55676	0.082999
HYLS1	-0.265371	3.24759	-2.61048	0.010575	0.126286	-2.99048	-2.55644	0.082999
AC015871.1	0.250114	4.01142	2.61034	0.0105786	0.126286	-3.13424	2.55632	0.082999
AL157938.2	-0.336254	5.33661	-2.61276	0.0105852	0.126286	-3.22218	-2.5561	0.082999
SATB1-AS1	0.301754	5.1774	2.609	0.0106378	0.12676	-3.23644	2.55438	0.0833105
CALD1	-1.28193	2.54915	-2.60855	0.010645	0.12676	-2.89854	-2.55414	0.0833105
SIAH1	-0.171692	5.17889	-2.60794	0.0106461	0.12676	-3.22166	-2.55411	0.0833105
PTRH1	-0.317076	5.09499	-2.60738	0.0106613	0.126858	-3.19043	-2.55361	0.0833745
AC109454.3	-0.300802	5.69765	-2.607	0.0106726	0.126908	-3.25795	-2.55324	0.0834074
IFI27	0.273052	2.71232	2.60615	0.0107171	0.127353	-2.93775	2.55179	0.0836998
AC012636.1	-0.249679	5.30468	-2.60541	0.0107341	0.127471	-3.22982	-2.55124	0.0837778
FGF14-AS2	-0.377993	2.80899	-2.60454	0.0107547	0.127541	-2.91518	-2.55057	0.0838236
AC004233.2	0.468675	0.142467	2.60395	0.0107612	0.127541	-2.75429	2.55036	0.0838236
ERV3-1	0.296288	2.78131	2.60388	0.0107642	0.127541	-2.94795	2.55026	0.0838236
PYM1	-0.267184	3.29113	-2.60371	0.0107683	0.127541	-2.99084	-2.55013	0.0838236
MMGT1	0.340787	2.78591	2.60307	0.0107884	0.127695	-2.93785	2.54948	0.0839245
ZNF142	-0.340949	4.40591	-2.60244	0.010808	0.127764	-3.16915	-2.54885	0.0839702
LINS1	-0.245481	4.1726	-2.60215	0.0108138	0.127764	-3.15668	-2.54866	0.0839702
NOL4L	0.159688	6.37722	2.6025	0.0108216	0.127764	-3.34664	2.54841	0.0839702
TMPRSS11A	-0.579115	2.14017	-2.60185	0.0108332	0.127764	-2.88534	-2.54803	0.0839702
TARDBP	0.147257	5.46208	2.60223	0.0108393	0.127764	-3.26207	2.54784	0.0839702
TOMM7	0.447231	4.95188	2.60374	0.0108424	0.127764	-3.14444	2.54774	0.0839702
AF107885.2	-0.261056	6.07005	-2.60169	0.0108508	0.127764	-3.30567	-2.54747	0.0839702
MKS1	0.212395	3.72192	2.60089	0.010851	0.127764	-3.07281	2.54746	0.0839702
AC109811.1	-0.413146	1.39516	-2.60388	0.010868	0.127862	-2.85601	-2.54691	0.0840342
TACR1	-0.38241	6.5936	-2.60153	0.0108879	0.127862	-3.34753	-2.54628	0.0840342
AF111167.2	0.483243	0.685087	2.59922	0.0108999	0.127862	-2.81347	2.54589	0.0840342
CCDC77	-0.267976	3.59473	-2.59932	0.0109027	0.127862	-3.05522	-2.5458	0.0840342
NDUFS7	0.256419	4.90887	2.60124	0.0109037	0.127862	-3.16863	2.54577	0.0840342
RPA1	0.22973	4.59967	2.59897	0.0109073	0.127862	-3.20232	2.54565	0.0840342
AMH	0.789043	-0.375573	2.59891	0.010909	0.127862	-2.7598	2.5456	0.0840342
AF127577.2	-0.281627	3.94489	-2.59949	0.0109346	0.127999	-3.09376	-2.54478	0.0841245
ZNF791	-0.153139	5.23911	-2.59895	0.0109369	0.127999	-3.22763	-2.54471	0.0841245
EEF1A1	0.433179	7.43188	2.60066	0.0109421	0.127999	-3.38268	2.54454	0.0841245
AC090579.1	-0.391289	7.3035	-2.59877	0.0109688	0.128125	-3.39945	-2.54369	0.0842074
ABCC5-AS1	-0.329884	3.61668	-2.59761	0.0109704	0.128125	-3.0423	-2.54364	0.0842074
HECTD1	-0.106428	7.49087	-2.5984	0.0109742	0.128125	-3.43192	-2.54352	0.0842074
TRMO	-0.396228	2.5395	-2.59622	0.0109888	0.128212	-2.90908	-2.54305	0.0842648
AL139317.5	-0.204148	5.74197	-2.59637	0.011036	0.128528	-3.29924	-2.54156	0.0844723
PEPD	0.208701	4.09456	2.59465	0.0110361	0.128528	-3.13933	2.54155	0.0844723
LHFPL2	-0.477136	1.29531	-2.59672	0.0110373	0.128528	-2.84429	-2.54152	0.0844723
KIAA0319	-0.427163	1.18852	-2.59483	0.0110497	0.128589	-2.82634	-2.54112	0.0845124
PFDN1	-0.182891	5.1646	-2.59331	0.0110775	0.128701	-3.26689	-2.54024	0.0845862
SS18L1	0.220212	4.36796	2.59302	0.0110844	0.128701	-3.18555	2.54003	0.0845862
LMAN2	0.209709	4.10725	2.59287	0.0110901	0.128701	-3.11929	2.53985	0.0845862
AC092338.3	-0.236942	5.89836	-2.59277	0.0110954	0.128701	-3.29963	-2.53968	0.0845862
RNF139	-0.244508	3.16919	-2.59243	0.0111024	0.128701	-3.03406	-2.53946	0.0845862
OR2A1-AS1	0.315427	3.36695	2.59205	0.0111135	0.128701	-3.07569	2.53911	0.0845862
EHMT2-AS1	-0.372212	2.21113	-2.59428	0.0111307	0.128701	-2.92387	-2.53857	0.0845862
CHMP4A	-0.26251	4.29828	-2.59147	0.0111307	0.128701	-3.17222	-2.53857	0.0845862
DDX17	0.126853	9.00127	2.59135	0.0111373	0.128701	-3.55776	2.53836	0.0845862
ERGIC2	-0.127997	5.4278	-2.59125	0.0111374	0.128701	-3.31383	-2.53836	0.0845862
ZBTB4	0.200653	5.45482	2.59154	0.011138	0.128701	-3.31174	2.53834	0.0845862
RRH	-0.357891	2.18982	-2.59083	0.0111714	0.12887	-2.89349	-2.53729	0.0846968
PTP4A2	0.226715	4.5474	2.59058	0.0111725	0.12887	-3.19389	2.53726	0.0846968
MBTPS2	-0.183019	5.10593	-2.5904	0.011174	0.12887	-3.24904	-2.53721	0.0846968
DOC2B	0.233941	7.02766	2.589	0.0112124	0.12923	-3.4419	2.53601	0.0849336
RGR	-0.406433	4.21862	-2.58826	0.0112277	0.129323	-3.16263	-2.53553	0.084995
MEX3A	0.461143	0.622217	2.58777	0.0112426	0.129404	-2.80332	2.53507	0.0850481
KAT14	0.243727	2.75421	2.58755	0.0112491	0.129404	-3.01988	2.53486	0.0850481
PKP4-AS1	-0.371944	2.91296	-2.58733	0.0112839	0.129659	-2.99226	-2.53378	0.0852153
AC010157.1	-0.524719	-0.205469	-2.58949	0.0112856	0.129659	-2.78716	-2.53373	0.0852153
ALG11	-0.201506	3.6987	-2.58637	0.0113111	0.129868	-3.09949	-2.53294	0.0853529
Z95118.2	0.326164	4.58348	2.58471	0.0113395	0.13001	-3.25186	2.53206	0.0854462
AC034228.3	-0.345892	2.53019	-2.58709	0.0113425	0.13001	-2.99708	-2.53196	0.0854462
PRDM15	0.238768	2.67524	2.58429	0.0113486	0.13001	-3.02245	2.53178	0.0854462
HK2	0.651307	7.11061	2.58417	0.0113523	0.13001	-3.44847	2.53166	0.0854462
AC006974.2	-1.06512	1.0965	-2.58342	0.0113818	0.130265	-2.84821	-2.53075	0.0856137
PCNT	0.247423	3.48117	2.58175	0.0114386	0.130678	-3.11267	2.52901	0.0858851
TMEM129	0.273405	2.91147	2.58371	0.0114424	0.130678	-2.98251	2.52889	0.0858851
RCOR1	0.171936	5.57759	2.58115	0.0114453	0.130678	-3.36295	2.5288	0.0858851
ATP6V0A4	-0.556364	0.479925	-2.58073	0.0114581	0.130678	-2.82894	-2.52841	0.0858851
PHF14	-0.175632	7.42961	-2.58187	0.0114652	0.130678	-3.45946	-2.52819	0.0858851
JMJD6	0.410547	4.55753	2.5805	0.0114652	0.130678	-3.2278	2.52819	0.0858851
LYSMD3	-0.180098	4.5999	-2.58051	0.0114777	0.130678	-3.21435	-2.52781	0.0858851
MTERF1	-0.229467	5.49524	-2.58003	0.0114911	0.130678	-3.32173	-2.5274	0.0858851
SMG5	-0.147772	6.10681	-2.58073	0.0114914	0.130678	-3.36611	-2.52739	0.0858851
FAM53A	0.473251	0.0747636	2.57964	0.0114919	0.130678	-2.80477	2.52737	0.0858851
CIB1	0.356958	2.91622	2.58142	0.0115101	0.130678	-2.99115	2.52682	0.0858851
SYNM	0.389546	2.95541	2.57917	0.0115132	0.130678	-3.00895	2.52672	0.0858851
AC068286.2	-0.359958	3.55958	-2.57888	0.0115153	0.130678	-3.10074	-2.52666	0.0858851
AL049828.2	-0.373044	1.30796	-2.58112	0.0115261	0.130678	-2.87447	-2.52633	0.0858851
AC016766.1	1.03497	0.325075	2.57852	0.0115268	0.130678	-2.81545	2.52631	0.0858851
TTI2	-0.266689	4.27971	-2.57763	0.0115542	0.130907	-3.21843	-2.52547	0.0860357
TSGA10	0.311389	6.04686	2.57736	0.0115645	0.130941	-3.40952	2.52516	0.0860581
C17orf49	0.531113	1.98689	2.57742	0.0115723	0.130947	-2.8964	2.52493	0.0860618
FAM138C	0.796637	2.3752	2.5766	0.0115861	0.131021	-2.90863	2.52451	0.0861105
BEAN1	-0.503136	3.0536	-2.57623	0.0115979	0.131038	-2.97919	-2.52415	0.0861219
LHX4	0.289245	6.0903	2.57615	0.0116022	0.131038	-3.40397	2.52402	0.0861219
ARMCX4	-0.252543	5.47969	-2.57535	0.0116266	0.131231	-3.33292	-2.52328	0.0862489
DYSF	0.753239	3.11484	2.57481	0.0116423	0.131326	-3.01615	2.5228	0.0863111
DHRS12	0.148113	4.42675	2.57451	0.0116687	0.131542	-3.23369	2.52201	0.0864529
DOCK8-AS1	-0.543358	1.85844	-2.57401	0.0116783	0.131567	-2.90156	-2.52172	0.0864695
ZNF384	-0.22217	3.04411	-2.57423	0.0116984	0.131711	-3.0626	-2.52111	0.0865642
NFYA	0.299777	2.97044	2.57151	0.0117459	0.132163	-3.08707	2.51969	0.0868613
SF3B4	-0.322957	2.42257	-2.57122	0.0117551	0.132185	-2.97154	-2.51941	0.0868755
TMEM138	-0.245895	4.7425	-2.57091	0.0117651	0.132214	-3.27601	-2.51911	0.0868949
GOLGA8R	-0.598705	0.160322	-2.57033	0.011784	0.132343	-2.82281	-2.51855	0.0869798
RTL8C	-0.416011	4.19367	-2.57153	0.0117934	0.132358	-3.15744	-2.51827	0.0869894
IL21R	-0.665885	0.734451	-2.5699	0.0118	0.132358	-2.83259	-2.51807	0.0869894
JAM3	0.388236	6.15406	2.56733	0.0118802	0.133175	-3.44367	2.51568	0.0875264
ALOX12	0.324269	1.24353	2.56835	0.0118992	0.133305	-2.89201	2.51512	0.0876119
AC000068.2	0.584739	0.0480713	2.56564	0.0119326	0.133596	-2.83528	2.51413	0.0878031
EIPR1	0.175263	5.51752	2.5642	0.0119852	0.134095	-3.36988	2.51258	0.0881309
VANGL1	0.419723	5.67157	2.5634	0.0120047	0.134095	-3.3945	2.512	0.0881309
CLSTN2	-0.630826	2.43164	-2.56388	0.0120061	0.134095	-2.97504	-2.51196	0.0881309
ZC3H10	-0.275189	2.30755	-2.56319	0.0120115	0.134095	-2.97126	-2.51181	0.0881309
GP1BB	0.811026	0.813448	2.56312	0.0120199	0.134095	-2.86892	2.51156	0.0881309
PIGP	0.340615	4.24611	2.56455	0.0120218	0.134095	-3.19564	2.5115	0.0881309
AC024610.2	-0.580605	4.32641	-2.56526	0.0120342	0.13415	-3.16494	-2.51114	0.0881672
PSG11	-0.37969	1.92071	-2.56198	0.0120523	0.134221	-2.92602	-2.51061	0.0882139
PITPNM3	-0.394239	2.85152	-2.56183	0.0120555	0.134221	-3.00315	-2.51051	0.0882139
AC004039.1	-0.303894	5.87442	-2.56291	0.0120681	0.134278	-3.39449	-2.51015	0.0882514
AL160314.2	0.35087	3.3315	2.56091	0.0120852	0.134385	-3.10934	2.50965	0.0883216
AC004490.1	0.479766	0.186454	2.56005	0.0121128	0.134609	-2.85681	2.50884	0.0884688
KIF15	0.35848	0.95684	2.55979	0.0121367	0.134709	-2.90073	2.50815	0.0885345
AC099681.1	0.444018	1.05375	2.56195	0.0121368	0.134709	-2.89962	2.50814	0.0885345
ANKUB1	-0.273838	7.15725	-2.56041	0.012167	0.134948	-3.4879	-2.50726	0.0886919
AC104964.2	-0.94161	-0.0766152	-2.55918	0.0121773	0.134948	-2.8477	-2.50696	0.0886919
ZNF20	-0.265048	3.75043	-2.55869	0.0121808	0.134948	-3.18114	-2.50686	0.0886919
LMO1	0.443535	1.82614	2.5588	0.0121973	0.135012	-2.96437	2.50638	0.0887337
PLEKHG5	0.465713	1.03867	2.5579	0.0122016	0.135012	-2.87043	2.50626	0.0887337
CELF4	0.260638	5.24243	2.55721	0.0122098	0.13502	-3.36077	2.50602	0.088739
FRMPD2	-0.142162	8.65534	-2.55775	0.0122174	0.135021	-3.59918	-2.5058	0.0887395
PTS	-0.202231	6.13619	-2.5567	0.0122267	0.135042	-3.42883	-2.50553	0.0887531
RNF145	0.147966	6.90423	2.55611	0.0122522	0.135233	-3.53067	2.5048	0.0888787
SCAF11	0.136513	7.69653	2.55557	0.012259	0.135233	-3.57582	2.5046	0.0888787
C16orf86	-0.368713	2.70585	-2.55537	0.0122691	0.13526	-3.02031	-2.50431	0.0888968
NR1H2	0.15675	4.38146	2.55484	0.012369	0.136279	-3.22555	2.50144	0.0895664
NLGN4X	0.317159	8.23225	2.55175	0.012385	0.136371	-3.63405	2.50098	0.0896267
MKNK1	0.420005	1.2959	2.55132	0.0123999	0.136371	-2.92851	2.50056	0.0896268
THSD1	0.241561	3.41727	2.55325	0.0124001	0.136371	-3.1526	2.50055	0.0896268
PLCD3	0.193372	4.4944	2.55167	0.0124213	0.13652	-3.28418	2.49994	0.089725
PLGLB1	0.271333	2.85554	2.55041	0.0124467	0.136717	-3.09873	2.49922	0.0898541
AC004112.1	-0.316365	3.26316	-2.54925	0.012468	0.136757	-3.13568	-2.49861	0.0898809
MRPL27	-0.247558	4.43521	-2.54935	0.0124732	0.136757	-3.26648	-2.49847	0.0898809
SLC5A4-AS1	0.544026	1.00357	2.54941	0.0124732	0.136757	-2.92502	2.49847	0.0898809
CTDP1	0.214321	3.54964	2.54782	0.0125158	0.137102	-3.19922	2.49726	0.0901071
VPS26A	-0.144119	5.24954	-2.5477	0.0125199	0.137102	-3.38727	-2.49714	0.0901071
USP51	-0.49971	0.874145	-2.54587	0.0125861	0.137744	-2.87887	-2.49527	0.090529
AC013733.1	-0.673557	2.70143	-2.54543	0.0125961	0.137769	-3.0279	-2.49499	0.0905459
AC008537.2	-0.54597	0.176683	-2.54499	0.012611	0.137849	-2.87114	-2.49457	0.090598
C12orf60	-0.287337	6.45993	-2.5442	0.0126378	0.138047	-3.48426	-2.49382	0.0907286
PYGB	0.155474	6.87974	2.5439	0.0126475	0.138047	-3.53668	2.49354	0.0907286
MSH2	-0.156563	8.25154	-2.5443	0.0126522	0.138047	-3.61586	-2.49341	0.0907286
AL138966.2	-0.462177	0.903294	-2.54285	0.0126833	0.138302	-2.905	-2.49254	0.0908962
UBE2V1	0.165551	5.44107	2.54249	0.012707	0.138477	-3.39772	2.49188	0.0910109
ACTR2	-0.151646	6.22133	-2.54126	0.012737	0.13872	-3.49859	-2.49104	0.0911706
AC245123.1	0.779617	-0.960705	2.54072	0.0127567	0.13885	-2.88107	2.49049	0.0912564
AL359916.1	0.490792	0.234717	2.54061	0.0127654	0.138861	-2.89012	2.49025	0.0912635
MSN	-0.538131	1.44649	-2.53903	0.0128289	0.139371	-2.94	-2.48848	0.0915982
FOS	-1.8766	1.36031	-2.53911	0.0128311	0.139371	-2.89766	-2.48842	0.0915982
ANKRD36	0.201625	7.31694	2.53889	0.0128354	0.139371	-3.57736	2.4883	0.0915982
DGKQ	0.351551	1.27718	2.53748	0.0128659	0.139545	-2.95612	2.48746	0.0917127
DCDC2B	-0.309381	3.66197	-2.53732	0.0128715	0.139545	-3.17141	-2.48731	0.0917127
THOC3	0.265733	2.47422	2.53722	0.0128747	0.139545	-3.08599	2.48722	0.0917127
AP000355.1	-0.768121	0.790769	-2.53625	0.0129082	0.139764	-2.92249	-2.48629	0.0918566
UBE2G2	0.178619	6.07977	2.53618	0.0129105	0.139764	-3.50048	2.48623	0.0918566
EIF5A	0.457775	3.13363	2.53738	0.0129394	0.139993	-3.07199	2.48543	0.0920075
NONO	-0.195256	5.12248	-2.53278	0.0130312	0.140901	-3.40212	-2.48292	0.0926043
ZNF519	0.206523	3.20167	2.53154	0.0130708	0.141244	-3.18967	2.48184	0.0928296
AP000844.2	-0.279055	4.49253	-2.53086	0.0130948	0.14131	-3.31784	-2.48118	0.092873
STMN3	0.303123	4.57812	2.53154	0.0130992	0.14131	-3.29494	2.48106	0.092873
USP35	0.327457	1.26734	2.53093	0.0131004	0.14131	-2.99207	2.48103	0.092873
AC053513.1	-0.363116	6.64066	-2.53295	0.0131141	0.141373	-3.53191	-2.48066	0.0929141
PHETA1	0.420205	0.316382	2.53008	0.0131344	0.141455	-2.911	2.48011	0.0929679
KTI12	-0.586697	0.198299	-2.52974	0.0131473	0.141455	-2.90481	-2.47975	0.0929679
DNAL4	0.317112	2.32999	2.53121	0.0131491	0.141455	-3.01636	2.4797	0.0929679
CPHXL	-0.669299	3.07367	-2.52897	0.0131604	0.141455	-3.082	-2.4794	0.0929679
POP1	-0.243643	4.06138	-2.53086	0.0131611	0.141455	-3.28233	-2.47938	0.0929679
NTNG2	0.148269	7.7614	2.52984	0.0131688	0.141455	-3.62762	2.47917	0.0929679
AP000873.3	-0.372288	1.09554	-2.52949	0.0131812	0.141503	-2.95356	-2.47884	0.0929998
LINC00624	-0.252147	4.10548	-2.52976	0.0131993	0.141613	-3.30181	-2.47835	0.0930719
CEP57	-0.102795	7.02482	-2.52868	0.0132175	0.141724	-3.55623	-2.47785	0.0931451
NUDT12	-0.192892	3.88159	-2.52715	0.0132325	0.1418	-3.26203	-2.47745	0.0931951
RPUSD2	-0.331299	2.69571	-2.52761	0.0132421	0.141819	-3.0845	-2.47719	0.0932076
DTX1	0.521784	2.5983	2.5264	0.0132507	0.141826	-3.1778	2.47696	0.0932121
ITGA2B	0.430487	4.32345	2.52615	0.0132629	0.141837	-3.32484	2.47663	0.0932189
AL354949.1	-0.326519	4.58495	-2.52656	0.013272	0.141837	-3.29752	-2.47639	0.0932189
BX649632.1	0.506108	-0.0856623	2.5257	0.0132753	0.141837	-2.90862	2.4763	0.0932189
DUSP16	-0.327163	4.57581	-2.52548	0.0132831	0.141837	-3.36783	-2.47609	0.0932189
PHF11	-0.283345	3.52234	-2.52497	0.0133033	0.14189	-3.237	-2.47555	0.0932543
AL035071.2	-0.29088	4.43193	-2.52502	0.0133039	0.14189	-3.32448	-2.47553	0.0932543
ANKRD45	-0.374399	5.6398	-2.52373	0.0133449	0.142194	-3.50751	-2.47443	0.0934538
OGDHL	0.18752	4.09962	2.52374	0.0133482	0.142194	-3.29749	2.47434	0.0934538
RPL37A	0.499583	6.09338	2.52505	0.0133757	0.142268	-3.45469	2.47361	0.0935027
LINC01844	-0.34307	6.70357	-2.52334	0.0133795	0.142268	-3.53837	-2.47351	0.0935027
LRATD2	0.269618	5.37201	2.52348	0.0133847	0.142268	-3.44937	2.47337	0.0935027
COPS4	-0.149217	5.45827	-2.52258	0.0133868	0.142268	-3.45479	-2.47331	0.0935027
LINC00310	-0.493577	0.0714954	-2.52136	0.013448	0.142707	-2.9255	-2.47168	0.0937914
SUFU	0.167384	5.37675	2.52071	0.0134676	0.142707	-3.44759	2.47116	0.0937914
GPX4	0.462171	5.50514	2.52259	0.0134689	0.142707	-3.38842	2.47112	0.0937914
TMEM164	0.264106	5.54278	2.52045	0.0134712	0.142707	-3.50691	2.47106	0.0937914
AC023424.3	-0.288555	6.04504	-2.52213	0.0134774	0.142707	-3.50072	-2.4709	0.0937914
HIST1H2BG	0.832914	-0.981655	2.52136	0.0134878	0.142707	-2.9371	2.47062	0.0937914
C5orf24	0.207592	4.38278	2.51963	0.013498	0.142707	-3.34524	2.47035	0.0937914
FBXW2	-0.168383	4.66299	-2.51941	0.0134992	0.142707	-3.38748	-2.47032	0.0937914
AC009065.4	0.390129	1.1559	2.51905	0.0135117	0.142707	-3.00001	2.46999	0.0937914
SAV1	0.250468	4.098	2.51887	0.0135185	0.142707	-3.32934	2.46981	0.0937914
KCTD1	0.184268	5.51765	2.51879	0.0135224	0.142707	-3.4881	2.46971	0.0937914
CPEB1	-0.329948	3.48477	-2.51873	0.0135232	0.142707	-3.1845	-2.46968	0.0937914
CDH18	-1.2641	0.473658	-2.5185	0.0135315	0.142711	-2.94019	-2.46947	0.0937934
ENTPD7	-0.195844	3.86496	-2.51813	0.0135446	0.142766	-3.31027	-2.46912	0.0938297
P4HA3	-0.25574	5.04525	-2.5191	0.0135667	0.142915	-3.39399	-2.46854	0.0939276
MTOR-AS1	-0.355171	0.960635	-2.51861	0.01362	0.143373	-2.9647	-2.46713	0.094229
AC005786.3	0.359535	3.19593	2.51586	0.0136411	0.143373	-3.19	2.46658	0.094229
MTRF1L	-0.19269	4.5898	-2.51555	0.0136442	0.143373	-3.35838	-2.4665	0.094229
TLCD3B	0.268286	6.3207	2.5162	0.0136451	0.143373	-3.53438	2.46647	0.094229
CSNK1E	0.144303	5.1685	2.51496	0.0136602	0.143373	-3.46702	2.46608	0.094229
STON2	-0.205555	6.49954	-2.51502	0.0136644	0.143373	-3.56221	-2.46597	0.094229
AC079035.1	-0.475128	0.380561	-2.51484	0.013666	0.143373	-2.94658	-2.46593	0.094229
AC079385.1	-0.55134	1.70159	-2.51339	0.0137159	0.143813	-3.03007	-2.46462	0.0945183
PUS10	0.193974	3.77915	2.51253	0.0137502	0.144089	-3.28808	2.46372	0.0946991
STX19	-0.347576	4.84943	-2.51453	0.013778	0.144297	-3.43592	-2.463	0.0948358
ABCA2	0.342563	2.10273	2.51151	0.0137918	0.144315	-3.07339	2.46264	0.0948481
INSIG1	-0.465411	2.94689	-2.51119	0.0137958	0.144315	-3.15225	-2.46254	0.0948481
PNPO	0.425976	1.25552	2.51067	0.0138184	0.144467	-2.988	2.46195	0.0949479
OPA3	-0.246001	5.03497	-2.51208	0.0138523	0.144738	-3.42449	-2.46107	0.0951258
FAIM	0.226471	6.40519	2.51154	0.0138781	0.144923	-3.53851	2.4604	0.0952475
CTNS	0.228467	3.11588	2.50861	0.0139089	0.145143	-3.20099	2.45961	0.0953918
AC020779.2	-0.513089	0.194702	-2.5078	0.0139308	0.145143	-2.95	-2.45904	0.0953918
AFAP1	0.40067	3.30767	2.50801	0.013932	0.145143	-3.21684	2.45901	0.0953918
SRCAP	-0.181564	4.41856	-2.50759	0.0139377	0.145143	-3.39985	-2.45887	0.0953918
ACOT9	-0.246335	4.95523	-2.50727	0.0139394	0.145143	-3.46167	-2.45882	0.0953918
AQP11	-0.246854	4.6315	-2.50707	0.0139479	0.145147	-3.37074	-2.4586	0.0953948
TLE3	0.257194	4.78219	2.50686	0.0139734	0.145254	-3.44238	2.45795	0.0954651
AC114939.1	-0.438957	1.39558	-2.50661	0.0139826	0.145254	-3.02369	-2.45771	0.0954651
NREP	0.166253	6.6855	2.50586	0.0139918	0.145254	-3.61929	2.45747	0.0954651
AC006116.8	-0.242591	4.2713	-2.5064	0.0139979	0.145254	-3.35085	-2.45732	0.0954651
COX16	-0.14588	4.93756	-2.5071	0.0139985	0.145254	-3.41439	-2.4573	0.0954651
AC027018.1	-0.279816	6.20975	-2.50569	0.0140336	0.145534	-3.55271	-2.4564	0.0956492
IKBKB	0.147448	7.681	2.50485	0.0140518	0.145578	-3.66918	2.45594	0.0956779
MGST2	-0.246015	4.7503	-2.5042	0.014054	0.145578	-3.40261	-2.45588	0.0956779
PRKCQ	-1.76064	2.31236	-2.50325	0.0140883	0.145777	-3.01881	-2.455	0.0958087
AC092119.2	0.41828	0.679676	2.50394	0.0140894	0.145777	-2.9756	2.45498	0.0958087
ZNF32-AS3	-0.478071	0.315506	-2.50268	0.0141094	0.145883	-2.96013	-2.45447	0.0958782
AC004982.2	-0.262226	4.62599	-2.50261	0.0141159	0.145883	-3.41162	-2.4543	0.0958782
WIPI2	0.13563	5.42336	2.50214	0.0141306	0.145951	-3.50073	2.45393	0.0959232
USP16	-0.169387	6.29106	-2.50125	0.014163	0.146177	-3.58471	-2.4531	0.0960714
AC009554.1	-0.273728	5.50708	-2.5035	0.0141687	0.146177	-3.50156	-2.45296	0.0960714
TEX261	0.237831	3.74	2.50079	0.0141811	0.146221	-3.32053	2.45264	0.0961009
NDRG3	-0.159799	7.53096	-2.50058	0.0142272	0.146519	-3.65626	-2.45147	0.0962963
STRN4	0.21822	2.8804	2.49951	0.0142279	0.146519	-3.23296	2.45146	0.0962963
PDIA6	0.216359	4.75547	2.49905	0.0142452	0.146519	-3.45644	2.45102	0.0962963
FBL	0.278985	2.90688	2.4996	0.0142547	0.146519	-3.17685	2.45078	0.0962963
FBLN7	0.58809	2.37887	2.49867	0.0142615	0.146519	-3.16907	2.45061	0.0962963
B4GALT7	0.327017	2.14725	2.49852	0.0142654	0.146519	-3.09667	2.45051	0.0962963
AC128687.3	-0.272835	2.74804	-2.49898	0.014267	0.146519	-3.14415	-2.45047	0.0962963
MCEE	0.172298	4.14043	2.49822	0.0142767	0.146519	-3.37764	2.45023	0.0962963
AC010761.3	-0.584695	0.74372	-2.49804	0.0142832	0.146519	-2.98854	-2.45006	0.0962963
LMAN1	-0.137893	6.21919	-2.49748	0.0143138	0.146632	-3.60076	-2.44929	0.0963706
RING1	-0.195268	4.35681	-2.49792	0.0143141	0.146632	-3.37747	-2.44928	0.0963706
AC132872.1	0.458624	1.07465	2.49704	0.0143235	0.146632	-3.03518	2.44905	0.0963706
C1orf54	-0.428397	1.72167	-2.49688	0.0143268	0.146632	-3.03325	-2.44896	0.0963706
TFAP4	0.394546	1.39596	2.4965	0.0143415	0.146699	-3.05887	2.44859	0.0964148
WAKMAR2	-0.199722	8.44536	-2.49791	0.0143637	0.146842	-3.72241	-2.44804	0.0965087
DIRC3-AS1	-1.2235	-1.01915	-2.49658	0.0143737	0.146861	-2.97322	-2.44779	0.0965214
CA1	-0.304138	6.10849	-2.49513	0.0144013	0.14706	-3.55319	-2.44709	0.0966522
AL021878.2	0.584238	-0.155046	2.49474	0.0144115	0.14708	-2.97287	2.44684	0.0966653
BMI1	0.23047	4.01289	2.49405	0.014444	0.147288	-3.38857	2.44603	0.0968019
AC008728.1	-0.31483	4.62946	-2.49544	0.0144516	0.147288	-3.43405	-2.44584	0.0968019
AL353768.1	-0.335707	1.66393	-2.49574	0.0144595	0.147288	-3.06228	-2.44564	0.0968019
GNB3	0.189038	9.11176	2.49427	0.0144646	0.147288	-3.76321	2.44551	0.0968019
PRPSAP2	0.10571	6.19597	2.49193	0.0145149	0.147517	-3.60206	2.44426	0.0969522
AC117386.2	-0.494251	1.79482	-2.49449	0.0145153	0.147517	-3.06578	-2.44425	0.0969522
BCORL1	0.368793	1.77869	2.49207	0.0145158	0.147517	-3.12487	2.44424	0.0969522
AL591845.1	0.84069	-0.311542	2.49152	0.0145305	0.147517	-2.98216	2.44388	0.0969522
ZMIZ2	0.226544	3.69792	2.49146	0.0145328	0.147517	-3.33675	2.44382	0.0969522
AL391121.1	-0.417367	1.54677	-2.4911	0.0145475	0.147517	-3.04328	-2.44345	0.0969522
AL445526.1	-0.95294	1.48365	-2.49094	0.0145554	0.147517	-3.03175	-2.44326	0.0969522
AP001972.3	0.907135	0.201081	2.49075	0.0145602	0.147517	-2.98631	2.44314	0.0969522
STAM-AS1	0.464794	2.05004	2.49079	0.0145608	0.147517	-3.0949	2.44312	0.0969522
PPP5C	0.178736	4.69179	2.49011	0.0145848	0.147677	-3.47838	2.44253	0.0970574
AL161716.1	-0.254785	8.24903	-2.49011	0.0146301	0.148006	-3.73305	-2.44141	0.0972736
AL355773.1	0.545483	1.2479	2.48892	0.0146362	0.148006	-3.09829	2.44126	0.0972736
LINC01115	-1.09628	-0.122516	-2.48842	0.0146495	0.148006	-2.98429	-2.44093	0.0972736
C2CD6	-0.284254	5.63438	-2.48821	0.0146596	0.148006	-3.55825	-2.44068	0.0972736
AC020908.1	0.352017	1.33714	2.48849	0.0146607	0.148006	-3.03341	2.44065	0.0972736
ST3GAL3	-0.281205	9.55952	-2.48827	0.0146811	0.148006	-3.79151	-2.44015	0.0972736
IQUB	0.192499	3.90689	2.48805	0.0146824	0.148006	-3.36905	2.44012	0.0972736
FGD6	0.173733	5.07025	2.48742	0.0146882	0.148006	-3.53384	2.43998	0.0972736
AL161804.1	-0.416028	3.55058	-2.48734	0.0146912	0.148006	-3.27185	-2.4399	0.0972736
AC109927.1	-0.453966	2.56604	-2.487	0.0147042	0.148054	-3.24254	-2.43958	0.0973052
CCNYL1	-0.183132	5.0644	-2.4866	0.0147197	0.148127	-3.52002	-2.4392	0.0973534
DRAIC	0.437046	3.5985	2.48678	0.014744	0.148289	-3.30248	2.43861	0.0974595
NOTCH2NLC	0.223369	4.48585	2.48626	0.0147535	0.148301	-3.44081	2.43837	0.0974677
RNF208	0.409718	1.85123	2.48524	0.0147726	0.148389	-3.09463	2.43791	0.0975254
SLC39A11	-0.352599	5.25031	-2.48514	0.0147787	0.148389	-3.52884	-2.43776	0.0975254
ZBTB38	-0.17576	6.908	-2.48365	0.014842	0.148763	-3.6615	-2.43621	0.0977711
YARS	-0.201288	5.55877	-2.48386	0.0148487	0.148763	-3.53188	-2.43605	0.0977711
CBR3-AS1	-0.427823	2.408	-2.48308	0.0148567	0.148763	-3.12373	-2.43585	0.0977711
DCT	-0.480276	3.31	-2.48345	0.0148657	0.148763	-3.27623	-2.43564	0.0977711
ZBTB2	-0.270067	1.6557	-2.48325	0.0148698	0.148763	-3.12121	-2.43553	0.0977711
TBCC	-0.416645	4.59255	-2.48275	0.014874	0.148763	-3.43733	-2.43543	0.0977711
KCNMB2-AS1	-0.456862	4.72681	-2.48242	0.014883	0.148763	-3.48573	-2.43521	0.0977711
AC009686.2	0.411009	1.18077	2.4824	0.0148831	0.148763	-3.08472	2.43521	0.0977711
XIST	-0.630985	1.97537	-2.48209	0.0148952	0.148763	-3.05315	-2.43492	0.0977711
AC012358.3	-0.197161	4.23808	-2.482	0.0148986	0.148763	-3.41913	-2.43483	0.0977711
FBXO17	0.176689	5.4635	2.48207	0.0149353	0.149046	-3.54481	2.43395	0.0979574
RPL13A	0.465183	6.28104	2.48246	0.0149709	0.149319	-3.56376	2.43308	0.0981368
IQCH-AS1	-0.170927	5.83862	-2.47932	0.0150675	0.150199	-3.57999	-2.43075	0.0987152
AP001267.1	-0.495755	0.779034	-2.47716	0.0150948	0.150383	-3.03309	-2.4301	0.098836
AC027682.4	0.251786	2.83977	2.47753	0.0151028	0.150383	-3.23516	2.4299	0.098836
KCNV2	0.228999	8.96506	2.47924	0.015111	0.150383	-3.77947	2.42971	0.098836
AC092142.1	-0.29564	2.71387	-2.47597	0.0151444	0.150572	-3.23247	-2.42891	0.0989601
AL031714.1	-0.406978	0.718425	-2.47573	0.0151467	0.150572	-3.03992	-2.42885	0.0989601
GALNT14	-0.771511	0.925269	-2.47457	0.0151917	0.150936	-3.09673	-2.42778	0.0991995
AC006960.3	-0.437088	0.849595	-2.47358	0.0152346	0.151061	-3.04266	-2.42675	0.0992818
DDB2	0.367535	3.41158	2.47365	0.0152378	0.151061	-3.29893	2.42668	0.0992818
AC091133.1	-0.298186	2.74446	-2.47418	0.0152379	0.151061	-3.23732	-2.42668	0.0992818
SLC20A2	-0.170804	5.75737	-2.47357	0.0152474	0.151061	-3.58849	-2.42645	0.0992818
AL160408.3	0.606426	0.868311	2.47319	0.0152485	0.151061	-3.08439	2.42642	0.0992818
ANKRD50	-0.395728	1.14958	-2.47398	0.0152547	0.151061	-3.08458	-2.42628	0.0992818
LINC00910	-0.219934	4.84248	-2.47265	0.0152874	0.151302	-3.47787	-2.4255	0.0994402
KIAA0930	0.382936	1.29416	2.47173	0.0153049	0.151393	-3.10365	2.42508	0.0994995
NDUFAF6	-0.145382	6.79482	-2.47092	0.0153476	0.151731	-3.68105	-2.42407	0.0997218
SLC25A33	-0.200247	6.2988	-2.47097	0.0153747	0.151916	-3.63326	-2.42343	0.0998435
HDHD2	-0.150195	5.33317	-2.46968	0.0153872	0.151956	-3.58261	-2.42313	0.0998699
RAB1B	0.301663	3.19334	2.46985	0.0154105	0.152103	-3.27211	2.42259	0.0999661
QRICH2	0.242508	3.13964	2.46913	0.0154198	0.152111	-3.31541	2.42237	0.0999719
RPGR	0.225432	6.74479	2.46861	0.0154305	0.152133	-3.71593	2.42211	0.0999863
KIF1A	0.186847	6.22817	2.46858	0.0154455	0.152198	-3.66778	2.42176	0.100029
ARF4	-0.212485	4.81869	-2.46793	0.0154732	0.152303	-3.48281	-2.42111	0.100098
TPR	-0.192083	6.31949	-2.46961	0.0154791	0.152303	-3.65516	-2.42097	0.100098
RAB40C	0.268009	3.27714	2.46733	0.015485	0.152303	-3.31659	2.42083	0.100098
IDO1	-0.461047	0.932042	-2.46712	0.0154909	0.152303	-3.05744	-2.42069	0.100098
POLE	0.273992	2.8272	2.46693	0.0154985	0.152303	-3.30036	2.42052	0.100098
STAT2	-0.236093	5.15984	-2.46752	0.0155442	0.152669	-3.54178	-2.41945	0.100338
DACH1	-0.539445	4.95971	-2.46556	0.0155538	0.15268	-3.48744	-2.41922	0.100346
SLC35E3	0.164506	5.25632	2.46535	0.0155636	0.152693	-3.57279	2.41899	0.100354
NR1D1	0.440521	2.98276	2.46534	0.0155722	0.152694	-3.27132	2.41879	0.100355
BUD13	-0.183879	3.70569	-2.46393	0.0156297	0.153175	-3.39324	-2.41745	0.100671
IL17D	0.262403	2.50682	2.46319	0.0156504	0.153294	-3.26505	2.41697	0.100749
AP001922.5	0.269355	4.06781	2.46439	0.015666	0.153342	-3.45395	2.41661	0.100781
BET1L	0.227046	3.02818	2.46274	0.0156723	0.153342	-3.29218	2.41646	0.100781
TRPV1	0.17173	4.96048	2.46334	0.0156825	0.153358	-3.54121	2.41622	0.100791
PDGFRL	-0.839392	2.34209	-2.46254	0.0156976	0.153422	-3.11564	-2.41587	0.100833
AC242022.2	0.311638	3.45241	2.4611	0.0157364	0.153718	-3.37642	2.41497	0.101028
CCDC124	0.320573	2.72653	2.46129	0.0157654	0.153918	-3.22288	2.4143	0.101159
MMACHC	-0.329564	1.7958	-2.46011	0.0157788	0.153965	-3.15005	-2.41399	0.10119
PIGX	-0.117051	5.54841	-2.45983	0.0158477	0.154554	-3.5862	-2.4124	0.101577
AC023590.1	-0.288312	7.22047	-2.4594	0.0158814	0.154798	-3.72443	-2.41163	0.101738
AC110015.1	-0.31282	4.1033	-2.45909	0.0158968	0.154865	-3.45187	-2.41128	0.101782
DAB1	-0.290174	6.0698	-2.45756	0.0159117	0.154926	-3.66671	-2.41093	0.101822
PAPSS1	0.138463	5.39098	2.45648	0.0159268	0.154949	-3.63359	2.41059	0.101837
DDX6	-0.168925	5.78295	-2.45641	0.0159341	0.154949	-3.65227	-2.41042	0.101837
ADARB2	1.09707	-0.0483437	2.45672	0.0159399	0.154949	-3.06179	2.41029	0.101837
TSPOAP1-AS1	-0.248672	3.38053	-2.45556	0.0159663	0.155123	-3.34949	-2.40968	0.101951
HS3ST2	-0.816119	-0.500944	-2.45613	0.0159929	0.155297	-3.04424	-2.40908	0.102066
ATP2C1	-0.205936	7.63405	-2.45436	0.0160154	0.155431	-3.80205	-2.40856	0.102154
AL355304.1	0.566548	1.09761	2.45358	0.0160477	0.155651	-3.13421	2.40783	0.102298
AC010624.1	0.348201	1.07283	2.45313	0.0160664	0.155651	-3.13535	2.4074	0.102298
TBX6	0.332441	1.80338	2.45303	0.0160745	0.155651	-3.15936	2.40722	0.102298
SEPHS2	-0.389108	3.21347	-2.45381	0.0160773	0.155651	-3.30346	-2.40716	0.102298
PPARG	-0.675692	2.17017	-2.45395	0.0160812	0.155651	-3.14659	-2.40707	0.102298
CEP131	0.251791	2.67146	2.45238	0.0160977	0.155726	-3.31511	2.40669	0.102348
AOC2	0.506212	-0.0990271	2.45159	0.0161311	0.155945	-3.0603	2.40594	0.102492
AL133259.1	0.378707	3.96948	2.45402	0.016141	0.155945	-3.50746	2.40571	0.102492
TMEM91	0.162806	4.74044	2.45123	0.0161463	0.155945	-3.55846	2.40559	0.102492
ZNF692	0.24463	3.86758	2.45068	0.016173	0.156078	-3.45003	2.40499	0.102579
AL137003.1	0.484528	1.51731	2.45049	0.0161774	0.156078	-3.17788	2.40489	0.102579
EPRS	0.146017	5.4264	2.45065	0.01619	0.156116	-3.65235	2.4046	0.102604
CALB2	0.869826	2.56255	2.44979	0.016228	0.156284	-3.18209	2.40375	0.102714
MYH3	-0.377039	2.83693	-2.44937	0.0162288	0.156284	-3.29823	-2.40373	0.102714
AC092140.1	-0.266165	3.29586	-2.44921	0.0162334	0.156284	-3.34294	-2.40362	0.102714
AL136456.1	-0.405845	1.65336	-2.44956	0.0162533	0.156314	-3.17394	-2.40318	0.102734
LSM7	0.289996	4.35071	2.4493	0.016254	0.156314	-3.4883	2.40316	0.102734
RPL18A	0.49639	5.53948	2.45018	0.0162875	0.156553	-3.56358	2.40241	0.102891
M6PR	-0.202141	5.04446	-2.44729	0.0163229	0.15681	-3.55426	-2.40161	0.10306
AC011466.3	-0.483727	1.11799	-2.44658	0.0163486	0.156931	-3.12821	-2.40104	0.103139
PAK3	0.758847	0.760336	2.44656	0.016353	0.156931	-3.08499	2.40094	0.103139
MDP1	-0.292654	3.45326	-2.44395	0.0164565	0.157804	-3.37699	-2.39863	0.103713
FLACC1	-0.343555	5.64247	-2.44404	0.0164615	0.157804	-3.6523	-2.39852	0.103713
SVBP	-0.242044	3.62624	-2.44391	0.0164773	0.157871	-3.40825	-2.39817	0.103758
UBOX5-AS1	-0.263045	4.16681	-2.44467	0.0165089	0.15801	-3.46994	-2.39747	0.103848
MAML3	-0.224734	9.20463	-2.44271	0.0165092	0.15801	-3.90944	-2.39746	0.103848
CADM2-AS2	-0.273515	5.65766	-2.44164	0.0165862	0.158662	-3.63757	-2.39575	0.104277
FUNDC2	0.250786	3.88326	2.44123	0.0166105	0.158731	-3.44073	2.39522	0.104322
AC011921.1	0.348441	2.33918	2.44081	0.016611	0.158731	-3.24256	2.39521	0.104322
AC005343.4	-0.428572	0.86441	-2.44151	0.0166207	0.158739	-3.11169	-2.39499	0.104328
AP000873.2	-0.198927	4.28553	-2.43975	0.0166423	0.158797	-3.49199	-2.39452	0.104366
CEL	0.316568	1.02004	2.43931	0.0166636	0.158797	-3.1577	2.39405	0.104366
AF129075.3	-0.301575	2.25594	-2.43917	0.0166645	0.158797	-3.23531	-2.39403	0.104366
AP001825.1	-0.295588	8.42876	-2.43995	0.0166683	0.158797	-3.84318	-2.39394	0.104366
AL365318.1	-0.38488	1.12308	-2.43964	0.0166721	0.158797	-3.15693	-2.39386	0.104366
ADGRL2	-0.506872	6.63331	-2.43871	0.0166797	0.158797	-3.75261	-2.39369	0.104366
AC064852.1	-0.324978	2.10045	-2.43915	0.0166978	0.158828	-3.22289	-2.3933	0.104386
Z94721.1	0.294333	2.99675	2.43787	0.01672	0.158828	-3.36125	2.39281	0.104386
STK38	0.405144	3.68812	2.43822	0.0167208	0.158828	-3.4418	2.39279	0.104386
AC008610.1	0.345408	1.90339	2.43804	0.0167243	0.158828	-3.21059	2.39271	0.104386
LARGE-AS1	-0.298701	5.18677	-2.43798	0.0167364	0.158828	-3.59625	-2.39245	0.104386
AC007098.1	-0.30672	3.8436	-2.43875	0.0167508	0.158828	-3.46161	-2.39213	0.104386
ETV4	-0.58393	2.81877	-2.43705	0.016752	0.158828	-3.22725	-2.39211	0.104386
AC022150.4	-0.443297	1.78009	-2.43861	0.0167536	0.158828	-3.2044	-2.39207	0.104386
ANKRD13A	0.353245	3.84324	2.43638	0.0167807	0.159001	-3.52941	2.39148	0.1045
ENO2	0.322981	8.30609	2.43539	0.0168307	0.159326	-3.86954	2.39038	0.104714
ESCO1	-0.175457	4.96851	-2.43667	0.0168327	0.159326	-3.60468	-2.39034	0.104714
AP001347.1	0.268019	3.44459	2.43492	0.0168444	0.159354	-3.43916	2.39009	0.104732
AC006064.2	-0.297643	3.29278	-2.43464	0.0168712	0.159474	-3.38079	-2.3895	0.104811
ABHD17A	0.320577	3.14264	2.43455	0.0168748	0.159474	-3.33749	2.38942	0.104811
NEUROD1	0.254496	6.8431	2.4346	0.0169145	0.159566	-3.7654	2.38856	0.104871
TRAPPC12-AS1	0.688429	1.33972	2.43321	0.0169193	0.159566	-3.1886	2.38846	0.104871
CYFIP1	0.688472	0.748738	2.43313	0.0169242	0.159566	-3.13768	2.38835	0.104871
AC092338.2	0.246211	3.03837	2.433	0.0169285	0.159566	-3.36101	2.38826	0.104871
ADGRL1	0.2159	4.85243	2.43347	0.0169289	0.159566	-3.5901	2.38825	0.104871
SERPINB6	-0.200818	4.87332	-2.4335	0.0169715	0.159884	-3.60508	-2.38732	0.10508
RUSC2	-0.172502	6.16564	-2.43176	0.0169911	0.159984	-3.72335	-2.3869	0.105146
AC010201.1	0.442255	0.130504	2.43114	0.0170102	0.16008	-3.11399	2.38649	0.105209
AC096711.2	0.585641	2.16612	2.43242	0.0170281	0.160083	-3.27639	2.3861	0.105211
RGS9	0.135482	9.22749	2.43156	0.0170462	0.160083	-3.92798	2.38571	0.105211
MTMR3	-0.122559	7.17076	-2.43214	0.0170534	0.160083	-3.79501	-2.38555	0.105211
LIG4	0.296511	3.5858	2.43018	0.0170538	0.160083	-3.48643	2.38555	0.105211
UNKL	0.214901	4.18793	2.43031	0.0170548	0.160083	-3.5197	2.38552	0.105211
Z99758.1	-0.314698	3.40217	-2.43161	0.0170881	0.160311	-3.43814	-2.38481	0.105361
GDAP1	-0.316909	8.28128	-2.42897	0.017106	0.160395	-3.91779	-2.38442	0.105416
TSPAN11	0.60887	1.52748	2.42799	0.0171496	0.160714	-3.19998	2.38348	0.105626
SERP1	-0.181844	5.83762	-2.42796	0.0171578	0.160714	-3.68515	-2.38331	0.105626
AC018628.2	-0.287483	3.91621	-2.42769	0.0172055	0.161031	-3.4687	-2.38229	0.105834
PABPC4-AS1	-0.32786	1.85419	-2.42849	0.0172145	0.161031	-3.2408	-2.38209	0.105834
SYNGAP1-AS1	0.260278	3.0781	2.4264	0.0172354	0.161031	-3.36061	2.38165	0.105834
AC244093.5	-0.474469	0.816731	-2.42739	0.0172358	0.161031	-3.1399	-2.38164	0.105834
AC068389.1	0.288721	3.8567	2.42619	0.0172364	0.161031	-3.47166	2.38163	0.105834
AC009495.1	0.571434	0.884597	2.42526	0.0172707	0.16126	-3.17234	2.38089	0.105985
RELN	-0.943978	-0.299639	-2.42505	0.0172866	0.16126	-3.1085	-2.38055	0.105985
RAB23	0.265052	2.56888	2.42488	0.0172878	0.16126	-3.35954	2.38053	0.105985
IFT22	-0.221876	4.92422	-2.42527	0.017312	0.161295	-3.59537	-2.38001	0.106007
HMGA1	0.241443	3.49668	2.42458	0.0173319	0.161295	-3.41859	2.37959	0.106007
TRIOBP	0.37638	2.19718	2.42384	0.0173339	0.161295	-3.289	2.37955	0.106007
PEX5L-AS1	-0.288757	5.2806	-2.42656	0.0173356	0.161295	-3.66635	-2.37951	0.106007
RNF152	0.770339	0.75439	2.42364	0.0173433	0.161295	-3.18583	2.37935	0.106007
PDXK	0.180514	5.47779	2.42381	0.0173452	0.161295	-3.70064	2.37931	0.106007
STK35	0.28256	8.58778	2.42334	0.0173566	0.161306	-3.92558	2.37906	0.106015
PLEKHB1	0.21173	8.59987	2.42533	0.0173644	0.161306	-3.87971	2.3789	0.106015
AC012313.6	-0.248997	4.37317	-2.42393	0.0173846	0.161364	-3.54085	-2.37847	0.106053
DNM1L	-0.161236	7.1632	-2.42314	0.0173885	0.161364	-3.8134	-2.37839	0.106053
FSIP1	-0.253115	4.71019	-2.42179	0.0174714	0.162049	-3.61065	-2.37663	0.106503
AC244213.1	0.690321	1.6013	2.42114	0.0175094	0.162318	-3.11289	2.37583	0.10668
AC245100.1	0.557154	-0.24454	2.4193	0.0175382	0.162501	-3.11748	2.37523	0.1068
MMP2-AS1	0.611774	6.84031	2.41941	0.017557	0.162592	-3.8	2.37483	0.10686
MOV10	0.328927	1.60486	2.41839	0.0175926	0.162812	-3.25609	2.37408	0.107005
ASB7	0.164765	4.18473	2.41777	0.0176077	0.162812	-3.57374	2.37377	0.107005
AC004865.2	0.456662	0.625028	2.41789	0.0176079	0.162812	-3.15849	2.37376	0.107005
WDR1	0.214738	5.70161	2.41766	0.017632	0.162832	-3.72184	2.37326	0.107018
QRSL1	-0.134938	4.92194	-2.41814	0.0176337	0.162832	-3.62984	-2.37322	0.107018
NAAA	-0.393465	4.29299	-2.41712	0.0176372	0.162832	-3.55345	-2.37315	0.107018
PRSS48	-0.302914	4.11028	-2.41845	0.0176747	0.163095	-3.55345	-2.37236	0.107191
MTA3	0.551022	2.73711	2.4151	0.0177291	0.163281	-3.37196	2.37123	0.107313
AP001107.9	0.188213	4.4075	2.41538	0.0177415	0.163281	-3.58256	2.37097	0.107313
MNT	0.219309	3.03226	2.41562	0.0177438	0.163281	-3.40359	2.37092	0.107313
RGS6	-0.505615	1.45386	-2.41471	0.0177487	0.163281	-3.18776	-2.37082	0.107313
CEP68	-0.21306	4.02645	-2.41456	0.0177538	0.163281	-3.54576	-2.37071	0.107313
ACSL4	-0.247087	4.61823	-2.41447	0.0177582	0.163281	-3.6118	-2.37062	0.107313
AC079804.3	-0.466481	-0.0927609	-2.41446	0.0177584	0.163281	-3.13112	-2.37062	0.107313
RNF227	-0.462754	1.33638	-2.41429	0.017783	0.163359	-3.20363	-2.3701	0.107364
MYO6	0.12298	7.74494	2.41426	0.017798	0.163359	-3.88514	2.36979	0.107364
C1orf162	0.403358	1.82236	2.41364	0.0178046	0.163359	-3.29761	2.36966	0.107364
AC005699.1	-0.450528	2.83635	-2.4132	0.0178163	0.163359	-3.4475	-2.36941	0.107364
MMP23B	0.564132	-0.308086	2.41311	0.0178205	0.163359	-3.13299	2.36933	0.107364
AC090772.2	-0.30646	4.46714	-2.41467	0.0178214	0.163359	-3.57093	-2.36931	0.107364
APPL2	0.129454	5.85341	2.41298	0.0178414	0.16346	-3.75741	2.36889	0.10743
GHITM	0.375953	4.81841	2.41362	0.0178842	0.163768	-3.56618	2.36801	0.107633
OTUD5	0.149798	4.5895	2.41161	0.0178945	0.16378	-3.62538	2.36779	0.107641
USP20	0.175779	4.11095	2.41133	0.0179141	0.163868	-3.54328	2.36739	0.107698
ASB18	-1.05649	-0.171565	-2.41089	0.0179223	0.163868	-3.12983	-2.36722	0.107698
TTC21B	0.122462	5.88277	2.41024	0.017954	0.164074	-3.77548	2.36657	0.107834
AC084361.1	-0.300108	6.52663	-2.41196	0.0179913	0.164332	-3.79871	-2.3658	0.108004
HARS2	-0.243258	3.44199	-2.4089	0.0180335	0.164513	-3.46257	-2.36493	0.108122
AL133523.1	-0.346076	2.53163	-2.40932	0.0180343	0.164513	-3.32581	-2.36491	0.108122
AC027682.6	0.286673	3.72565	2.40851	0.0180385	0.164513	-3.52103	2.36483	0.108122
ARHGEF37	0.380748	2.83917	2.4066	0.0181212	0.165104	-3.42473	2.36313	0.108511
TTYH2	0.313778	1.91695	2.40659	0.0181217	0.165104	-3.30397	2.36312	0.108511
GYG1	0.205052	4.68355	2.40498	0.0182073	0.16564	-3.65385	2.36138	0.108864
AL390866.1	-0.518466	1.12266	-2.40449	0.0182196	0.16564	-3.25401	-2.36113	0.108864
MNS1	-0.192896	5.883	-2.40678	0.0182285	0.16564	-3.75572	-2.36094	0.108864
AL139294.1	-0.29976	5.94445	-2.40526	0.0182328	0.16564	-3.75025	-2.36086	0.108864
KBTBD8	-0.532831	-0.359297	-2.40408	0.0182392	0.16564	-3.15105	-2.36073	0.108864
ZMAT1	0.208064	5.93437	2.40407	0.0182414	0.16564	-3.80062	2.36068	0.108864
RAP1B	-0.161792	6.39829	-2.40401	0.0182472	0.16564	-3.82721	-2.36056	0.108864
HULC	0.18323	6.57249	2.40376	0.0182556	0.16564	-3.85913	2.36039	0.108864
AC019130.1	-0.321173	4.80681	-2.40508	0.0182634	0.16564	-3.64365	-2.36023	0.108864
AF230666.1	-0.624641	-0.324811	-2.40436	0.0182791	0.1657	-3.15589	-2.35991	0.108902
PSKH1	0.178919	4.04268	2.40288	0.0182953	0.165762	-3.58089	2.35959	0.108944
TRAF1	0.235312	4.20676	2.40287	0.0183075	0.165775	-3.60739	2.35934	0.108952
CEP152	0.402834	3.39293	2.4023	0.0183224	0.165775	-3.52678	2.35904	0.108952
FBXL2	-0.122622	7.04268	-2.40247	0.0183323	0.165775	-3.86074	-2.35884	0.108952
AL031428.1	-0.269252	4.88417	-2.40327	0.0183335	0.165775	-3.64906	-2.35881	0.108952
NOTCH2NLA	0.337893	1.99421	2.40182	0.0183618	0.165947	-3.34055	2.35824	0.109065
TRIM13	-0.175823	6.03848	-2.40131	0.0183763	0.165995	-3.76044	-2.35795	0.109097
AF121898.1	-1.13543	3.76906	-2.40021	0.0184218	0.166323	-3.44974	-2.35703	0.109312
FAM169A	-0.150787	8.1462	-2.40151	0.0184407	0.16641	-3.93072	-2.35665	0.109369
GUCY1B1	0.679847	2.63334	2.39976	0.0184545	0.166451	-3.45261	2.35637	0.109396
AC138024.1	-0.418581	1.04048	-2.4018	0.0184828	0.166584	-3.2863	-2.3558	0.109484
ZNF865	0.291187	1.97792	2.40009	0.0184878	0.166584	-3.27503	2.3557	0.109484
MDH1B	-0.207985	4.14619	-2.39856	0.0184998	0.166609	-3.6045	-2.35546	0.1095
[truncated: 16,004 more rows]

## Sheet: BC age gender interaction DEG
	logFC	AveExpr	t	P.Value	adj.P.Val	B	z.std	qval
GAL3ST1	1.15919	-0.116584	6.83496	4.65313e-10	6.08984e-06	11.6536	6.23038	3.70811e-06
DDX60L	0.778289	1.35918	6.76668	6.76536e-10	6.08984e-06	11.7871	6.17148	3.70811e-06
HEMK1	0.408954	3.23437	6.58596	1.57437e-09	9.44779e-06	11.3534	6.03656	5.75277e-06
AC069277.1	-1.47431	-0.810185	-5.99041	2.77601e-08	0.000107869	7.54322	-5.55501	6.56815e-05
AC017083.1	0.571535	2.06365	5.96881	2.99586e-08	0.000107869	8.45714	5.54168	6.56815e-05
SMIM2-AS1	0.946428	0.0354244	5.76595	7.42638e-08	0.000204371	7.12067	5.38054	0.000124442
AC010333.2	-0.631773	2.3488	-5.78268	7.94646e-08	0.000204371	7.67925	-5.36834	0.000124442
CLCA4-AS1	0.619797	1.63958	5.70765	9.67926e-08	0.00021782	7.4486	5.33264	0.00013263
GLIPR1L2	0.892986	3.92627	5.65844	1.34119e-07	0.000256312	7.27912	5.27313	0.000156069
NEDD9	-0.73468	3.68028	-5.62078	1.46694e-07	0.000256312	7.14667	-5.25666	0.000156069
AL157893.2	-0.629904	2.71808	-5.59952	1.58996e-07	0.000256312	7.02924	-5.24183	0.000156069
SMCO4	0.675682	1.37799	5.58185	1.70846e-07	0.000256312	6.83299	5.22855	0.000156069
LINC01791	-0.858388	1.33747	-5.51058	2.53346e-07	0.000350846	6.47068	-5.15521	0.00021363
GNAS-AS1	0.486859	1.6215	5.40333	3.78764e-07	0.000487064	6.18668	5.07933	0.000296573
AC012464.1	-0.549978	2.85518	-5.36565	4.92911e-07	0.000591591	6.05577	-5.02905	0.00036022
XIST	-1.20288	1.38216	-5.27722	6.7296e-07	0.000757206	5.63519	-4.96901	0.000461063
REC114	-0.545619	3.14775	-5.23304	7.96229e-07	0.000843207	5.59414	-4.93629	0.000513429
EIF1B-AS1	0.299913	5.43716	5.1108	1.40541e-06	0.00136628	4.97912	4.82424	0.000831926
GVQW2	0.430447	2.14065	5.09525	1.44194e-06	0.00136628	4.99812	4.81912	0.000831926
STAM-AS1	0.522508	2.31125	5.06514	1.66244e-06	0.0014592	4.85585	4.79065	0.000888507
FAM207A	0.34933	4.88646	5.06045	1.70212e-06	0.0014592	4.80527	4.78591	0.000888507
AC130650.1	-0.488528	2.79026	-5.02017	2.01367e-06	0.00164782	4.69801	-4.75205	0.00100336
LINC02231	-0.97537	1.60747	-4.99217	2.32727e-06	0.00175172	4.57394	-4.72271	0.00106663
DCAF15	-0.40407	3.82056	-4.98808	2.33524e-06	0.00175172	4.55758	-4.72201	0.00106663
AC012313.8	0.60289	0.374876	4.96862	2.47148e-06	0.00177976	4.32305	4.71047	0.0010837
C20orf96	0.56654	1.92034	4.95755	2.5907e-06	0.00179386	4.42039	4.70086	0.00109228
PLD6	0.512278	1.34466	4.93624	2.84429e-06	0.00182789	4.3571	4.68176	0.001113
AC023389.1	-0.402481	3.89112	-4.9393	2.88165e-06	0.00182789	4.36323	-4.67908	0.001113
DDX55	0.328988	4.5585	4.92521	2.98388e-06	0.00182789	4.28283	4.67193	0.001113
CCDC144NL	0.667316	1.52302	4.92288	3.04597e-06	0.00182789	4.29162	4.6677	0.001113
Z93930.2	0.349475	4.17486	4.91106	3.17019e-06	0.00184106	4.25212	4.65947	0.00112102
LINC00200	-0.554307	3.97754	-4.86805	3.88632e-06	0.00214574	4.06515	-4.61737	0.00130654
PDIA4	0.697974	2.38834	4.84562	4.12895e-06	0.00214574	4.04219	4.60478	0.00130654
AC004233.1	0.687675	0.954936	4.84363	4.18194e-06	0.00214574	3.93498	4.60213	0.00130654
DDX59-AS1	0.572125	1.05306	4.84193	4.23996e-06	0.00214574	3.97045	4.59926	0.00130654
FTCD	0.888015	0.11956	4.83636	4.29077e-06	0.00214574	3.83049	4.59678	0.00130654
AC108058.1	-0.495373	0.848404	-4.82256	4.64134e-06	0.00225833	3.80713	-4.58038	0.0013751
CLEC4A	0.623241	1.13673	4.80124	4.96251e-06	0.00235105	3.85566	4.56637	0.00143156
AC061958.1	-0.681894	3.54023	-4.7905	5.18769e-06	0.00236917	3.83929	-4.55705	0.00144259
DHRS12	0.259435	4.31722	4.78478	5.33809e-06	0.00236917	3.74585	4.55104	0.00144259
RBMX2	0.42784	3.59683	4.78835	5.39555e-06	0.00236917	3.79401	4.54879	0.00144259
LINC02389	-0.676049	3.34599	-4.75616	6.04156e-06	0.00258967	3.67799	-4.52493	0.00157685
AP001505.1	0.407395	3.65727	4.75155	6.29408e-06	0.00263517	3.63888	4.51626	0.00160456
AC010307.4	-0.538765	2.96445	-4.73815	6.6198e-06	0.00268069	3.61389	-4.50556	0.00163227
AC008083.2	-0.782137	0.807146	-4.72826	6.70061e-06	0.00268069	3.49206	-4.50298	0.00163227
TUT1	0.279204	3.36921	4.71548	7.06066e-06	0.00276333	3.54287	4.49185	0.00168259
LINC01289	-0.514978	2.62785	-4.71261	7.7104e-06	0.00295341	3.50412	-4.47307	0.00179833
OR2H2	-0.817203	1.02435	-4.68092	8.18799e-06	0.00307101	3.23374	-4.46021	0.00186994
AC109441.1	-0.644644	2.47353	-4.66544	8.90673e-06	0.00327241	3.35184	-4.44214	0.00199257
PTPN14	-0.645689	0.694123	-4.65391	9.11102e-06	0.00328051	3.16271	-4.43726	0.00199751
AC026991.2	-0.621791	3.0727	-4.63573	1.00441e-05	0.00354557	3.24312	-4.41622	0.0021589
AC024996.1	-1.06705	0.919502	-4.62972	1.02624e-05	0.00355295	3.16898	-4.41157	0.00216339
AL445526.1	-0.667699	3.87057	-4.59834	1.13684e-05	0.00386161	3.06556	-4.38936	0.00235134
GLT8D2	0.390771	1.70716	4.58248	1.21156e-05	0.00403921	3.05249	4.3755	0.00245948
AC022433.1	-1.31806	1.17799	-4.56606	1.2932e-05	0.00412105	2.96737	-4.36125	0.00250931
C1orf162	0.406143	2.07913	4.56195	1.32259e-05	0.00412105	3.00275	4.35633	0.00250931
CHRM2	1.0925	3.46786	4.55142	1.37133e-05	0.00412105	2.90098	4.3484	0.00250931
RBPMS	-0.732399	3.55876	-4.5495	1.40075e-05	0.00412105	2.91993	-4.34374	0.00250931
AC008700.1	-0.769182	4.04966	-4.55399	1.40151e-05	0.00412105	2.89593	-4.34362	0.00250931
NCKAP5L	-0.242894	5.0867	-4.55648	1.40736e-05	0.00412105	2.8381	-4.34271	0.00250931
AC004949.1	0.993599	-0.0351479	4.54513	1.40914e-05	0.00412105	2.81373	4.34243	0.00250931
AC007255.1	-0.561246	2.20425	-4.53707	1.4523e-05	0.00412105	2.91639	-4.3358	0.00250931
AC024560.5	-0.379011	3.4233	-4.54154	1.46502e-05	0.00412105	2.8733	-4.33388	0.00250931
MYO16-AS1	-0.749	0.632084	-4.54245	1.46502e-05	0.00412105	2.81886	-4.33388	0.00250931
TTC4	0.265291	4.03896	4.52993	1.49458e-05	0.00413952	2.81105	4.32949	0.00252056
Z98884.1	-0.393275	5.09	-4.51176	1.65132e-05	0.0044576	2.66991	-4.30747	0.00271424
USP12-AS1	-0.545342	2.03424	-4.50605	1.65894e-05	0.0044576	2.76814	-4.30645	0.00271424
AC004477.1	0.552972	1.82673	4.49483	1.72593e-05	0.00456941	2.72535	4.29768	0.00278231
PPP3CB-AS1	-0.342282	2.74615	-4.48548	1.82383e-05	0.00470574	2.69523	-4.28543	0.00286533
EIPR1	0.237226	5.5566	4.48061	1.84027e-05	0.00470574	2.53735	4.28344	0.00286533
MOV10	0.317903	1.8879	4.47547	1.85584e-05	0.00470574	2.67327	4.28156	0.00286533
SPDYE6	-0.811582	1.03121	-4.47011	1.8955e-05	0.00472658	2.62065	-4.27686	0.00287802
AC100763.1	-0.475781	3.29894	-4.47367	1.91657e-05	0.00472658	2.63481	-4.27439	0.00287802
AC092821.3	0.560295	2.45768	4.45694	1.99693e-05	0.00485821	2.61465	4.26523	0.00295817
ZNF99	0.492471	2.85604	4.4509	2.04902e-05	0.00491847	2.57217	4.25948	0.00299486
AC010307.2	-0.468745	2.49508	-4.45221	2.07868e-05	0.004924	2.57274	-4.25627	0.00299823
BTD	-0.213848	6.65279	-4.43354	2.21023e-05	0.00501626	2.34402	-4.24252	0.0030544
LARGE-AS1	-0.460364	4.28978	-4.43565	2.21179e-05	0.00501626	2.45248	-4.24236	0.0030544
AL157886.1	0.733847	0.78834	4.42908	2.22884e-05	0.00501626	2.49009	4.24064	0.0030544
LINC01364	-0.650313	1.89489	-4.43046	2.26194e-05	0.00501626	2.49544	-4.23733	0.0030544
LINC01116	-0.531521	3.3836	-4.42072	2.32002e-05	0.00501626	2.45034	-4.23163	0.0030544
MAGI1-AS1	-0.530689	2.41573	-4.42305	2.34594e-05	0.00501626	2.45844	-4.22913	0.0030544
AC106886.3	0.582761	0.13343	4.41149	2.38899e-05	0.00501626	2.38773	4.22504	0.0030544
AC114316.1	-0.554191	2.60695	-4.41581	2.4103e-05	0.00501626	2.42954	-4.22304	0.0030544
ASB18	-1.60738	0.295366	-4.40992	2.41705e-05	0.00501626	2.22468	-4.22241	0.0030544
CYFIP1	0.33236	2.6488	4.40789	2.4225e-05	0.00501626	2.41804	4.2219	0.0030544
SLC35F3	1.17979	-0.0122186	4.41121	2.42412e-05	0.00501626	2.23006	4.22175	0.0030544
KLC3	0.639831	0.220466	4.39539	2.54425e-05	0.00520501	2.30654	4.21084	0.00316933
NOP9	0.42091	1.58724	4.39543	2.58382e-05	0.00522657	2.36576	4.20735	0.00318246
RBAK	0.283322	3.62379	4.38356	2.66482e-05	0.00531529	2.28725	4.20037	0.00323648
AL589642.1	-0.846763	3.74677	-4.38147	2.68673e-05	0.00531529	2.29269	-4.19851	0.00323648
AC091045.1	-0.522526	3.07607	-4.3757	2.76334e-05	0.00540744	2.30973	-4.19214	0.00329259
AL096854.1	-0.480479	2.99743	-4.37494	2.81631e-05	0.00545184	2.27393	-4.18783	0.00331963
ZNF727	0.510338	5.09189	4.36053	2.91566e-05	0.00556218	2.12691	4.17996	0.00338682
AC016716.2	-0.548598	4.3051	-4.36021	2.93511e-05	0.00556218	2.20101	-4.17844	0.00338682
ANKRD31	0.362412	2.87222	4.355	2.97954e-05	0.00558757	2.21498	4.17502	0.00340227
AP001266.2	-0.425246	4.74445	-4.35646	3.01854e-05	0.00560234	2.14385	-4.17206	0.00341127
NCAPH2	0.365531	3.24038	4.31652	3.46425e-05	0.00620981	2.08404	4.14058	0.00378116
SERPINE3	-0.723298	3.82685	-4.31544	3.47706e-05	0.00620981	2.08688	-4.13974	0.00378116
AC005670.1	0.475834	0.923357	4.31484	3.48212e-05	0.00620981	2.10461	4.1394	0.00378116
TBX6	0.519223	0.565422	4.31284	3.50971e-05	0.00620981	2.02408	4.13759	0.00378116
NR6A1	-0.263634	7.63688	-4.31409	3.51831e-05	0.00620981	1.88874	-4.13703	0.00378116
RAB27A	0.356809	3.7526	4.30216	3.65763e-05	0.00639304	1.97456	4.12811	0.00389272
YES1	-0.227294	4.86323	-4.30027	3.73907e-05	0.00647254	1.91696	-4.12304	0.00394113
IFT27	0.267993	4.69933	4.30463	3.77924e-05	0.00647978	1.95016	4.12058	0.00394554
AP000857.2	-0.556753	6.73902	-4.29395	3.849e-05	0.00652394	1.84601	-4.11636	0.00397243
AC147651.1	-0.681813	0.683873	-4.28758	3.87747e-05	0.00652394	1.96113	-4.11466	0.00397243
RAD51AP1	0.326497	2.5399	4.28789	3.94217e-05	0.00657138	1.98851	4.11084	0.00400131
CYBC1	0.30262	3.27899	4.27724	4.03983e-05	0.00667239	1.94917	4.10519	0.00406282
AC007221.1	-0.918023	3.13554	-4.26913	4.15415e-05	0.0067575	1.89622	-4.09873	0.00411465
HIST1H2BN	0.581025	2.47239	4.26804	4.17164e-05	0.0067575	1.94372	4.09776	0.00411465
NUDT16	0.29145	3.74023	4.27294	4.20397e-05	0.0067575	1.89514	4.09597	0.00411465
NR2F2-AS1	-0.696435	2.82934	-4.26719	4.25404e-05	0.00677748	1.92487	-4.09323	0.00412681
CRLF3	-0.362142	7.96778	-4.26359	4.30433e-05	0.00679745	1.70821	-4.09051	0.00413897
C2orf74	0.484333	3.56025	4.25457	4.41864e-05	0.00691729	1.84398	4.08442	0.00421194
CHDH	-0.488527	2.95248	-4.24565	4.57823e-05	0.00710533	1.85025	-4.07618	0.00432644
NRSN2-AS1	-0.317615	4.90114	-4.23571	4.72707e-05	0.00727362	1.68488	-4.06873	0.00442891
SMYD5	0.387734	2.28164	4.21839	5.04597e-05	0.00767537	1.77675	4.05349	0.00467354
AC121334.3	-0.734845	3.88048	-4.21654	5.18265e-05	0.00767537	1.71093	-4.04723	0.00467354
AC012085.2	-0.438769	5.29872	-4.21809	5.18435e-05	0.00767537	1.60085	-4.04716	0.00467354
CCDC71	0.536858	1.43256	4.21367	5.19643e-05	0.00767537	1.73057	4.04661	0.00467354
MAN2B1	-0.286777	2.90529	-4.20836	5.28214e-05	0.00767537	1.71279	-4.04278	0.00467354
MTHFD1	-0.297043	4.61983	-4.20632	5.29994e-05	0.00767537	1.60435	-4.04199	0.00467354
AC073111.4	0.517304	1.78166	4.205	5.31189e-05	0.00767537	1.72206	4.04146	0.00467354
AL590062.1	0.455101	1.50404	4.20296	5.3582e-05	0.00767537	1.71574	4.03943	0.00467354
NPEPL1	-0.37359	3.65713	-4.20652	5.37187e-05	0.00767537	1.66034	-4.03883	0.00467354
TPD52L2	0.295077	4.48382	4.20392	5.42643e-05	0.00769228	1.59911	4.03646	0.00468383
AC004803.1	0.364671	1.29604	4.20198	5.53649e-05	0.00778698	1.69124	4.03174	0.0047415
B3GNT10	0.558014	0.252507	4.18955	5.63214e-05	0.00786011	1.63276	4.02772	0.00478602
FAM24B	0.232077	3.24467	4.1858	5.72208e-05	0.00788476	1.61188	4.02399	0.00480104
PKN2-AS1	-0.535325	4.96295	-4.19217	5.7374e-05	0.00788476	1.51875	-4.02336	0.00480104
RFPL3S	0.487294	1.09429	4.18176	5.80133e-05	0.00791222	1.66433	4.02075	0.00481776
FSIP1	0.344171	2.41846	4.18471	5.94785e-05	0.00799478	1.63254	4.01487	0.00486803
AC132192.2	0.507821	3.13423	4.17979	5.95068e-05	0.00799478	1.59508	4.01476	0.00486803
VWC2	-0.556154	7.87083	-4.17771	6.07482e-05	0.00803246	1.41118	-4.00989	0.00489097
KRTAP10-4	1.50445	-1.01367	4.16934	6.08131e-05	0.00803246	1.46446	4.00963	0.00489097
SGPP2	-0.459202	2.5482	-4.16744	6.12548e-05	0.00803246	1.59402	-4.00792	0.00489097
C6	-0.751766	0.0192539	-4.17149	6.15719e-05	0.00803246	1.48038	-4.0067	0.00489097
AL512358.1	-0.672709	0.089669	-4.17037	6.23838e-05	0.00807982	1.5085	-4.00361	0.00491981
AC117834.2	-0.600012	0.0442977	-4.16525	6.40976e-05	0.00824249	1.51132	-3.99719	0.00501886
PPL	-0.346952	4.12285	-4.15162	6.50351e-05	0.00830374	1.45018	-3.99375	0.00505615
STK17A	-0.351191	4.26341	-4.15272	6.63977e-05	0.00837047	1.41896	-3.98884	0.00509679
AC090241.2	-0.494104	1.88158	-4.15314	6.66092e-05	0.00837047	1.53843	-3.98808	0.00509679
EPHB1	0.411384	3.82038	4.14391	6.69526e-05	0.00837047	1.42064	3.98686	0.00509679
AC025569.1	-0.484492	3.261	-4.14372	6.75234e-05	0.00838361	1.47051	-3.98485	0.00510479
ZNF263	0.236453	3.60048	4.13757	6.86844e-05	0.00846936	1.41973	3.9808	0.005157
AC044840.1	-0.484434	2.22293	-4.13632	6.98658e-05	0.00854371	1.48878	-3.97674	0.00520227
AC007285.2	-0.484744	1.52505	-4.13918	7.02366e-05	0.00854371	1.49001	-3.97548	0.00520227
AP001462.1	-0.370448	2.89573	-4.12723	7.31674e-05	0.00884049	1.4402	-3.96574	0.00538298
AC233280.1	0.743522	1.20316	4.115	7.50399e-05	0.00889899	1.4004	3.95971	0.0054186
AC244517.11	-0.471765	3.99594	-4.12073	7.56936e-05	0.00889899	1.30224	-3.95764	0.0054186
ZNF7	-0.279873	4.52692	-4.11414	7.58158e-05	0.00889899	1.2889	-3.95726	0.0054186
EPN2-AS1	-0.388434	2.95376	-4.11209	7.6017e-05	0.00889899	1.37914	-3.95662	0.0054186
FAM245B	-0.9317	1.85266	-4.11577	7.61231e-05	0.00889899	1.39495	-3.95629	0.0054186
ERI1	-0.196162	6.50858	-4.09683	8.12523e-05	0.00940071	1.13471	-3.94068	0.0057241
AP002370.2	-0.583727	7.11064	-4.09197	8.21735e-05	0.00940071	1.11543	-3.93797	0.0057241
AC093765.2	-0.589444	3.2607	-4.09422	8.26822e-05	0.00940071	1.27798	-3.93649	0.0057241
SCOC-AS1	0.349274	3.48578	4.08633	8.34508e-05	0.00940071	1.25338	3.93427	0.0057241
SLC22A4	-0.293782	3.75983	-4.09119	8.37013e-05	0.00940071	1.23882	-3.93355	0.0057241
UBE2G2	0.181297	5.79973	4.0873	8.37843e-05	0.00940071	1.11444	3.93331	0.0057241
AC092155.1	-0.76763	3.90861	-4.08901	8.40702e-05	0.00940071	1.19484	-3.93249	0.0057241
CCDC155	-0.399747	5.57543	-4.07851	8.67795e-05	0.00959801	1.10183	-3.92486	0.00584423
GPR82	-0.423368	2.86555	-4.07544	8.69008e-05	0.00959801	1.27742	-3.92453	0.00584423
YIPF4	-0.145034	6.46852	-4.07065	8.93395e-05	0.00962828	1.04212	-3.91786	0.00586266
HSD17B7	0.418296	4.3425	4.06542	8.9883e-05	0.00962828	1.1392	3.91639	0.00586266
NBPF9	0.28355	3.29442	4.06511	9.01203e-05	0.00962828	1.17699	3.91576	0.00586266
C1QTNF6	0.515293	0.995028	4.05738	9.28104e-05	0.00962828	1.23799	3.90866	0.00586266
AL078581.4	-0.370793	3.58926	-4.06369	9.2868e-05	0.00962828	1.15112	-3.90851	0.00586266
LINC00471	0.549067	2.71892	4.05383	9.38582e-05	0.00962828	1.19993	3.90594	0.00586266
SPATC1L	0.7309	1.26041	4.054	9.39216e-05	0.00962828	1.20027	3.90578	0.00586266
C3orf18	0.249419	2.67031	4.05651	9.45805e-05	0.00962828	1.20269	3.90409	0.00586266
AC005291.2	-0.594023	1.67097	-4.05434	9.45866e-05	0.00962828	1.20673	-3.90407	0.00586266
AMOT	0.383452	1.20879	4.05094	9.48653e-05	0.00962828	1.224	3.90336	0.00586266
NSMCE1-DT	0.370191	3.70153	4.05041	9.52237e-05	0.00962828	1.11919	3.90245	0.00586266
MARVELD3	-0.640604	2.96042	-4.05097	9.54168e-05	0.00962828	1.1871	-3.90196	0.00586266
AC004076.2	-0.786641	1.94689	-4.04856	9.57089e-05	0.00962828	1.2169	-3.90122	0.00586266
AC011478.1	-0.596767	1.31173	-4.04742	9.61157e-05	0.00962828	1.20401	-3.90019	0.00586266
GIN1	0.216585	4.53941	4.0488	9.61797e-05	0.00962828	1.0411	3.90003	0.00586266
WWC3-AS1	-0.540325	0.823091	-4.04817	9.65176e-05	0.00962828	1.17045	-3.89918	0.00586266
PM20D1	-0.491391	3.00891	-4.05334	9.65504e-05	0.00962828	1.16896	-3.8991	0.00586266
AC008537.2	-0.468504	1.78377	-4.04507	9.77403e-05	0.00962828	1.18836	-3.89613	0.00586266
IQUB	0.46407	2.71845	4.04267	9.78283e-05	0.00962828	1.13804	3.89592	0.00586266
RAPGEFL1	-0.428438	3.18113	-4.04409	9.79068e-05	0.00962828	1.16059	-3.89572	0.00586266
MYRIP	0.285854	6.17744	4.04426	9.8406e-05	0.00962828	0.950524	3.89449	0.00586266
AC005695.2	-0.402534	4.01044	-4.04145	9.94046e-05	0.00967341	1.08211	-3.89204	0.00589014
COX15	0.244213	4.52417	4.02701	0.000103685	0.0100357	0.975059	3.8818	0.00611076
AC004112.1	-0.395666	3.0546	-4.01989	0.00010704	0.010305	1.06794	-3.87405	0.00627472
AL157400.3	0.319652	3.50239	4.01922	0.000108482	0.0103883	1.0077	3.87079	0.00632545
AC022613.2	-0.566098	0.878378	-4.01323	0.000109297	0.010411	1.03826	-3.86897	0.00633927
AC010148.1	0.86513	0.262385	4.00868	0.000110957	0.0105045	1.0466	3.86529	0.00639622
IRF3	0.320092	4.54687	4.00853	0.000111446	0.0105045	0.925722	3.86422	0.00639622
AL355073.1	-0.704836	0.813704	-4.01191	0.000113067	0.0106018	1.07501	-3.86069	0.00645541
AC079841.2	-0.552406	1.76347	-4.00764	0.000113828	0.0106178	1.04699	-3.85905	0.0064652
C2orf88	-0.309974	5.00914	-4.0044	0.000115133	0.0106843	0.866496	-3.85626	0.00650565
AC020558.1	0.500208	0.972567	3.99195	0.000118395	0.0109306	0.999368	3.84943	0.00665564
AC100793.3	-0.317127	3.16326	-3.98827	0.000119914	0.0110144	0.94655	-3.8463	0.00670665
SNX31	1.04843	1.15737	3.9839	0.000121579	0.0111105	1.00423	3.84292	0.00676522
CCDC148-AS1	-0.453632	3.05604	-3.98054	0.000123736	0.0112506	0.921671	-3.8386	0.00685049
AL160254.1	-0.530435	4.90849	-3.98311	0.000125122	0.0113195	0.795284	-3.83587	0.00689243
STARD13-AS	-0.519481	2.97763	-3.97595	0.000126249	0.0113387	0.909083	-3.83366	0.00690413
ADGRF3	0.399653	2.47431	3.97159	0.000127205	0.0113387	0.931941	3.83181	0.00690413
MOB1B	0.321415	3.30856	3.97534	0.000127224	0.0113387	0.866618	3.83177	0.00690413
LINC01266	0.512247	3.98374	3.9685	0.00012866	0.0114102	0.794299	3.82901	0.00694767
LINC00903	-0.446016	2.70194	-3.96668	0.000130193	0.0114895	0.912184	-3.82609	0.00699597
ZPLD1	-0.775397	0.438213	-3.96464	0.000132732	0.0116516	0.881291	-3.82133	0.00709467
AL161443.1	-0.607657	1.87002	-3.95879	0.000133324	0.0116516	0.919905	-3.82024	0.00709467
AL355581.1	-0.463051	1.29864	-3.94586	0.000140478	0.0122175	0.8642	-3.80733	0.00743923
AP000842.2	-0.408185	2.92724	-3.94361	0.000141175	0.0122191	0.801462	-3.8061	0.00744021
COQ4	0.201993	5.1564	3.93469	0.000145777	0.0124894	0.624406	3.79816	0.00760483
AC108471.2	0.292991	2.44241	3.93305	0.000146483	0.0124894	0.796208	3.79696	0.00760483
FCHO1	-0.359003	3.50771	-3.93687	0.00014673	0.0124894	0.751691	-3.79654	0.00760483
ZNF419	0.308685	2.31827	3.93333	0.000147086	0.0124894	0.805787	3.79594	0.00760483
AP003393.1	-0.52981	5.42673	-3.93496	0.000147767	0.0124894	0.620902	-3.79479	0.00760483
AC010491.1	0.441877	2.4101	3.9242	0.000151303	0.0127285	0.771434	3.78892	0.00775042
AL355999.1	-0.30429	3.64985	-3.92034	0.000154475	0.0129326	0.6887	-3.78376	0.00787469
BCL2L14	-0.442825	5.36036	-3.92195	0.000155166	0.0129326	0.578455	-3.78265	0.00787469
WARS2-IT1	-0.585457	0.0766087	-3.92106	0.000157089	0.0129991	0.729437	-3.77959	0.00791515
CAV3	-0.516241	2.61921	-3.91658	0.000157961	0.0129991	0.706567	-3.77821	0.00791515
ADAL	0.242488	4.96377	3.91223	0.000158428	0.0129991	0.564778	3.77747	0.00791515
HGSNAT	-0.201728	6.85656	-3.91562	0.000158851	0.0129991	0.504949	-3.77681	0.00791515
AC104461.1	-0.450392	3.30735	-3.91175	0.000162768	0.0132594	0.695574	-3.77073	0.00807364
AC119868.2	-0.517595	8.38545	-3.89752	0.00016809	0.0134498	0.431347	-3.7627	0.00818961
AP001977.1	-0.788973	0.144811	-3.89605	0.00016879	0.0134498	0.637544	-3.76166	0.00818961
AC117944.1	-0.550711	6.65906	-3.89672	0.000168798	0.0134498	0.454625	-3.76165	0.00818961
AC048382.5	-0.270798	3.95275	-3.89404	0.000169166	0.0134498	0.582065	-3.7611	0.00818961
MALSU1	0.264177	5.06631	3.89782	0.000169264	0.0134498	0.506899	3.76096	0.00818961
STK32C	0.255142	3.41039	3.89432	0.000169589	0.0134498	0.622546	3.76048	0.00818961
RNF214	-0.194732	5.26432	-3.89511	0.000172282	0.0135517	0.485131	-3.75654	0.00825161
SRP14-AS1	0.247404	4.00541	3.88828	0.000172378	0.0135517	0.554321	3.7564	0.00825161
RAB26	-0.334975	5.79972	-3.88353	0.000177789	0.0138844	0.438103	-3.74865	0.0084542
AC091820.2	-0.561931	1.74958	-3.88086	0.000178153	0.0138844	0.657563	-3.74814	0.0084542
RNF125	-0.466011	2.77972	-3.87928	0.000179534	0.0139098	0.62262	-3.7462	0.00846971
DOCK1	-0.423889	4.50311	-3.8737	0.000182049	0.0139098	0.453172	-3.74271	0.00846971
DLGAP1-AS3	-0.550547	1.30959	-3.87524	0.00018299	0.0139098	0.634737	-3.74141	0.00846971
RAD51C	0.173637	4.62647	3.87267	0.000183148	0.0139098	0.451692	3.74119	0.00846971
AC109439.2	-0.486402	4.41303	-3.87167	0.000183411	0.0139098	0.447121	-3.74083	0.00846971
AC007773.1	0.460021	0.621186	3.87094	0.000183537	0.0139098	0.635564	3.74066	0.00846971
SYN3	0.624592	2.95046	3.87214	0.000183888	0.0139098	0.571499	3.74018	0.00846971
SAMSN1-AS1	-0.50432	6.4075	-3.87099	0.000185718	0.0139895	0.380151	-3.73769	0.00851819
TXNL4B	0.314518	2.8225	3.86496	0.000187547	0.0140137	0.555793	3.73523	0.00853294
AC009562.1	-0.499873	6.80159	-3.86535	0.000187768	0.0140137	0.347442	-3.73493	0.00853294
AL627309.5	0.43724	0.933714	3.86385	0.000188375	0.0140137	0.605489	3.73412	0.00853294
GRM7-AS3	-0.558756	0.628822	-3.86202	0.000189541	0.0140424	0.588237	-3.73256	0.00855044
YTHDF1	0.24661	4.20395	3.86042	0.000191178	0.014073	0.422003	3.7304	0.00856905
ARHGEF7-AS2	-0.513455	0.485869	-3.85958	0.000191517	0.014073	0.572048	-3.72995	0.00856905
MFSD4B	-0.311588	7.51697	-3.86392	0.000192881	0.0141156	0.327361	-3.72816	0.008595
KCNMA1-AS1	-0.542492	7.14018	-3.85926	0.000195271	0.0142326	0.330065	-3.72506	0.00866625
PSKH2	-0.899769	-0.217714	-3.85797	0.000196389	0.0142564	0.540467	-3.72362	0.00868075
STRIP2	-0.333479	4.43419	-3.85012	0.000197988	0.0143148	0.385313	-3.72157	0.00871628
AC009137.1	-0.389239	3.15156	-3.85023	0.000201649	0.0144589	0.49606	-3.71694	0.00880406
NADK2	0.25135	4.23831	3.84322	0.000202813	0.0144589	0.356069	3.71549	0.00880406
RERGL	-0.766649	0.300017	-3.84406	0.000203519	0.0144589	0.47261	-3.71461	0.00880406
SLA	0.618139	2.17518	3.84136	0.000204179	0.0144589	0.516068	3.71379	0.00880406
TRPM8	0.743049	-0.37736	3.84122	0.000205129	0.0144589	0.408294	3.71261	0.00880406
LTBR	-0.600006	0.960055	-3.83996	0.000205316	0.0144589	0.508958	-3.71238	0.00880406
AL138787.2	-0.34329	3.91101	-3.8424	0.000205604	0.0144589	0.398628	-3.71203	0.00880406
AC108449.1	-0.346481	3.26688	-3.84262	0.000207742	0.0145525	0.427415	-3.70941	0.008861
FBXO36	-0.186632	4.6877	-3.84588	0.00020903	0.0145859	0.349994	-3.70785	0.00888137
MROH9	-1.19452	2.16497	-3.83187	0.000212383	0.0147422	0.5073	-3.70381	0.00897655
USP54	-0.220056	5.63021	-3.83236	0.000213365	0.0147422	0.259716	-3.70264	0.00897655
BTN3A3	0.435677	0.186735	3.82875	0.00021406	0.0147422	0.466134	3.70182	0.00897655
AC011092.2	-0.364428	5.05364	-3.83026	0.000214545	0.0147422	0.297597	-3.70124	0.00897655
AC011466.1	0.405294	1.01551	3.82451	0.000216947	0.0148505	0.4782	3.69842	0.00904249
AC003102.1	-0.435054	3.55484	-3.82321	0.000219296	0.0149545	0.376742	-3.69568	0.00910581
AC015849.3	-0.399473	5.5428	-3.82119	0.000221505	0.0150481	0.251471	-3.69314	0.00916281
RWDD4	0.227667	3.55794	3.81774	0.00022421	0.0151747	0.346221	3.69005	0.00923986
NOVA1	-0.205754	8.57937	-3.8156	0.000226799	0.0152924	0.148422	-3.68713	0.00931155
RFX4	-0.415257	2.36251	-3.8046	0.000233136	0.015661	0.404568	-3.68011	0.009536
AC110296.1	-0.4731	7.40261	-3.80459	0.000235965	0.0157921	0.137527	-3.67703	0.00961582
ZNF529-AS1	-0.167135	4.5821	-3.79745	0.000238935	0.0159316	0.190133	-3.67384	0.00970078
AC079177.1	-0.511797	0.743827	-3.79968	0.000240229	0.0159588	0.38707	-3.67246	0.00971735
AC097537.1	-0.483929	2.88114	-3.80138	0.000242129	0.0160259	0.286415	-3.67045	0.00975817
AC008443.5	0.532244	2.8288	3.79109	0.000247179	0.0163003	0.339845	3.66516	0.00992524
AL109824.1	-0.305135	5.51519	-3.79011	0.000248262	0.0163119	0.134203	-3.66405	0.00993232
IQSEC3	0.247838	5.67763	3.78504	0.000251029	0.0164337	0.101901	3.66121	0.0100065
AC008393.1	0.423854	1.64883	3.77577	0.000259531	0.0169253	0.321779	3.65267	0.0103058
KCNMB2	-0.42171	5.82656	-3.77633	0.000260418	0.0169253	0.0696542	-3.65179	0.0103058
SGO2	0.332423	3.38451	3.77159	0.000261958	0.0169641	0.198859	3.65028	0.0103295
CCNB1	0.414249	1.99938	3.76899	0.000264496	0.0170671	0.293653	3.6478	0.0103922
TAGAP	-0.534655	0.0745386	-3.77141	0.000267036	0.0171359	0.242844	-3.64534	0.0104341
LINC01476	-0.557592	1.20934	-3.76666	0.000267712	0.0171359	0.293393	-3.64469	0.0104341
AC092574.2	-0.362599	4.97212	-3.76476	0.000268418	0.0171359	0.0682863	-3.64402	0.0104341
ANKRD24	0.40911	1.97202	3.76157	0.000271863	0.0171997	0.256276	3.64073	0.0104729
FOXN3-AS2	-0.676995	0.0241171	-3.76325	0.000272259	0.0171997	0.267983	-3.64036	0.0104729
SIAH2-AS1	0.418585	2.33595	3.75819	0.000274708	0.0171997	0.242629	3.63805	0.0104729
GRM7-AS1	-0.339327	3.75966	-3.7639	0.000275202	0.0171997	0.140596	-3.63759	0.0104729
SPACA6P-AS	0.531158	0.872561	3.75522	0.000277605	0.0171997	0.276713	3.63535	0.0104729
TTI1	0.188944	4.1594	3.75526	0.000277976	0.0171997	0.084626	3.635	0.0104729
LINC01524	0.543335	0.946323	3.75416	0.000278795	0.0171997	0.255959	3.63425	0.0104729
IMPACT	0.182243	3.44233	3.75302	0.000279779	0.0171997	0.131006	3.63334	0.0104729
NBPF15	0.231864	4.08961	3.75353	0.000280337	0.0171997	0.0686759	3.63282	0.0104729
AL662844.4	0.571387	3.03553	3.7523	0.000280489	0.0171997	0.186505	3.63268	0.0104729
AC021915.1	-0.481848	0.757194	-3.75941	0.000281423	0.0171997	0.257447	-3.63183	0.0104729
FECH	0.21614	3.39056	3.75081	0.000282235	0.0171997	0.12815	3.63108	0.0104729
LINC00499	-0.56808	2.76541	-3.75718	0.000282396	0.0171997	0.177169	-3.63094	0.0104729
CENPK	0.51034	1.47165	3.74973	0.000283413	0.0171997	0.23566	3.63001	0.0104729
AC061975.8	-0.437616	2.48525	-3.74845	0.000284403	0.0171997	0.20536	-3.62911	0.0104729
CCDC90B	0.247005	5.10413	3.74903	0.000286219	0.0171997	0.013068	3.62746	0.0104729
RPS4Y1	0.931384	3.08237	3.75237	0.000287532	0.0171997	0.0250952	3.62628	0.0104729
SLC16A9	0.584171	3.74689	3.74499	0.00028788	0.0171997	0.0993078	3.62597	0.0104729
SEL1L2	0.457536	3.13246	3.74412	0.000288721	0.0171997	0.137183	3.62521	0.0104729
ZNF257	0.366861	2.45401	3.74658	0.000289829	0.0171997	0.194783	3.62423	0.0104729
DPP4	-0.533205	0.644849	-3.75064	0.000290044	0.0171997	0.240995	-3.62403	0.0104729
F2R	0.487713	0.927039	3.74209	0.0002908	0.0171997	0.234412	3.62336	0.0104729
AL137100.3	-0.49578	5.59946	-3.747	0.000291391	0.0171997	-0.00759835	-3.62284	0.0104729
ATF7IP2	0.220248	6.43154	3.74912	0.000292905	0.0172326	-0.0525606	3.6215	0.0104929
AC010168.1	-0.402174	4.89115	-3.74169	0.000297304	0.0174338	0.0181321	-3.61764	0.0106154
AL117379.1	0.566249	0.681958	3.73417	0.000299977	0.0174338	0.205468	3.61532	0.0106154
RNASET2	0.315486	3.38016	3.73522	0.000300125	0.0174338	0.113574	3.61519	0.0106154
DUSP15	0.597979	1.25264	3.73426	0.000300198	0.0174338	0.193963	3.61513	0.0106154
AC019068.1	-1.20693	1.2142	-3.7334	0.000301722	0.0174391	0.18792	-3.61382	0.0106187
RASA4	-0.387868	5.39323	-3.73637	0.000302228	0.0174391	-0.0338105	-3.61338	0.0106187
AP000779.1	-0.360023	3.81472	-3.7295	0.000309707	0.0178136	0.0178914	-3.60704	0.0108467
B3GNT5	-0.429125	5.21144	-3.72616	0.000312726	0.0178264	-0.0737044	-3.60452	0.0108545
SGTA	0.253294	4.53705	3.72464	0.000313975	0.0178264	-0.0198299	3.60349	0.0108545
DGKE	-0.289214	8.10919	-3.72025	0.000314854	0.0178264	-0.166025	-3.60276	0.0108545
AC018616.1	-0.859305	1.27818	-3.72096	0.000315727	0.0178264	0.154042	-3.60204	0.0108545
STRADB	-0.301045	6.64461	-3.7232	0.00031596	0.0178264	-0.122125	-3.60185	0.0108545
TARSL2	0.193802	6.17353	3.71992	0.000317112	0.0178264	-0.133188	3.6009	0.0108545
AC023509.6	-0.36369	5.30177	-3.71986	0.000317458	0.0178264	-0.087687	-3.60062	0.0108545
FGD1	-0.240472	2.90232	-3.72053	0.000317852	0.0178264	0.0894324	-3.6003	0.0108545
STARD4-AS1	-0.343003	6.64561	-3.71751	0.000321156	0.0179558	-0.131541	-3.59761	0.0109333
AC003005.2	1.10177	0.133095	3.71205	0.000323252	0.018017	0.129779	3.59592	0.0109706
ANKRD42	0.295693	2.74363	3.7116	0.000324602	0.0180365	0.0547259	3.59483	0.0109824
SNHG19	0.488583	3.50163	3.71221	0.000326899	0.0181082	0.0387755	3.59299	0.0110261
AC117834.1	-0.374835	4.85072	-3.71184	0.000329346	0.0181617	-0.0951827	-3.59105	0.0110587
C9orf129	-0.418597	2.36361	-3.71036	0.000329883	0.0181617	0.0773507	-3.59063	0.0110587
CHRM3-AS2	-0.366722	4.69878	-3.70713	0.000336395	0.0184015	-0.109248	-3.58553	0.0112047
C14orf28	0.275979	2.45742	3.70016	0.000337033	0.0184015	0.0416203	3.58503	0.0112047
AC106779.1	0.399338	1.62871	3.69999	0.000337429	0.0184015	0.0962268	3.58473	0.0112047
AC018653.4	-0.526085	1.49656	-3.70213	0.000338327	0.0184015	0.0981818	-3.58403	0.0112047
AP001267.3	-0.2947	3.67739	-3.70011	0.000340026	0.018432	-0.0136695	-3.58273	0.0112233
ANKRD36	0.289411	7.55631	3.69805	0.000340936	0.018432	-0.239749	3.58203	0.0112233
PPP1R3B	-0.470996	1.25727	-3.6946	0.000347359	0.0187231	0.0762536	-3.57715	0.0114005
CALU	-0.163456	5.59179	-3.69153	0.000349313	0.0187322	-0.200779	-3.57568	0.011406
WDR89	0.174876	4.10282	3.69597	0.00035016	0.0187322	-0.100036	3.57505	0.011406
NEMP2	-0.283812	2.69522	-3.69243	0.000350649	0.0187322	-0.0173887	-3.57469	0.011406
AL133367.1	0.444291	1.2437	3.68968	0.000351975	0.0187473	0.0601891	3.5737	0.0114153
AC139720.1	-0.445311	5.17933	-3.69002	0.000353252	0.0187599	-0.181814	-3.57275	0.0114229
EVI2B	-0.376497	3.01441	-3.68603	0.000362059	0.0191322	-0.0740423	-3.5663	0.0116496
AC073167.1	-0.381786	5.4525	-3.68283	0.000362389	0.0191322	-0.20489	-3.56606	0.0116496
CAPN5	0.524049	2.8155	3.67785	0.000364376	0.0191809	-0.0487417	3.56463	0.0116792
AC027287.2	0.504507	2.97999	3.67542	0.000368124	0.0193217	-0.0771223	3.56194	0.011765
AC046195.2	-0.502306	3.83433	-3.67548	0.000370176	0.0193509	-0.126431	-3.56048	0.0117828
AL121658.1	0.395835	1.11559	3.67591	0.000372215	0.0193509	0.0161378	3.55904	0.0117828
HIST2H2BE	0.411565	4.71517	3.6755	0.000372841	0.0193509	-0.168397	3.5586	0.0117828
CHMP4A	-0.185961	4.40399	-3.67239	0.000373826	0.0193509	-0.169506	-3.5579	0.0117828
FAM66A	0.770848	2.66592	3.67022	0.000374265	0.0193509	-0.0924127	3.5576	0.0117828
ZNF729	0.528938	0.218904	3.66912	0.000375764	0.0193509	-0.0225572	3.55655	0.0117828
CCZ1	-0.212362	4.74424	-3.67453	0.000376204	0.0193509	-0.204136	-3.55624	0.0117828
ZNF841	0.336368	2.0308	3.66336	0.000383307	0.0196601	-0.0638417	3.55132	0.011971
ZNF430	-0.166507	4.98768	-3.66347	0.000386548	0.0197699	-0.26154	-3.5491	0.0120379
GRM3	-0.361928	2.97914	-3.6626	0.000388416	0.0197712	-0.111979	-3.54783	0.0120387
HIST1H2AE	0.81895	1.50081	3.66233	0.000389269	0.0197712	-0.0244959	3.54725	0.0120387
DBF4	0.270422	3.65867	3.65802	0.000390439	0.0197712	-0.1876	3.54646	0.0120387
AF111167.2	0.367358	1.70985	3.65763	0.000390965	0.0197712	-0.0348495	3.54611	0.0120387
AC092171.4	0.380661	3.14315	3.65828	0.000394543	0.0198462	-0.137343	3.54371	0.0120844
C11orf74	0.194563	4.97551	3.65583	0.000395271	0.0198462	-0.282819	3.54322	0.0120844
POLD3	0.210588	4.87057	3.65462	0.000396062	0.0198462	-0.289795	3.54269	0.0120844
MFSD8	-0.19132	5.57696	-3.65493	0.000396859	0.0198462	-0.318495	-3.54216	0.0120844
AC064875.1	-0.4998	1.80495	-3.65064	0.000400663	0.019981	-0.0695366	-3.53965	0.0121664
ZNF670	0.280975	4.37498	3.64889	0.000403027	0.0200434	-0.265575	3.53809	0.0122044
NUDT7	0.47836	1.91197	3.64621	0.000406826	0.0201766	-0.0947089	3.53562	0.0122855
AC010307.3	-0.577194	1.6368	-3.64597	0.000410979	0.0202723	-0.0885084	-3.53293	0.0123438
ZNF880	0.386429	4.03972	3.64367	0.000411009	0.0202723	-0.264045	3.53291	0.0123438
CHCHD6	0.159895	5.72967	3.64359	0.000412388	0.0202788	-0.367153	3.53203	0.0123477
AC006064.2	-0.36112	3.62436	-3.64212	0.000414441	0.0202788	-0.222656	-3.53071	0.0123477
AC084361.1	-0.460568	5.53306	-3.64657	0.000414519	0.0202788	-0.335426	-3.53066	0.0123477
AC006270.1	-0.376126	3.13055	-3.6395	0.000421339	0.0205356	-0.16777	-3.52634	0.0125041
AL157385.2	-0.639018	0.307862	-3.63798	0.000423174	0.0205356	-0.111757	-3.52519	0.0125041
JPX	-0.152327	7.94197	-3.64164	0.000423191	0.0205356	-0.423538	-3.52518	0.0125041
IFI16	0.753965	0.404604	3.63319	0.000426429	0.0206371	-0.109536	3.52316	0.0125659
ITGA9	-0.339722	3.47099	-3.6306	0.000430062	0.0207034	-0.200616	-3.52091	0.0126063
MDC1-AS1	-0.35502	3.31117	-3.63419	0.000430099	0.0207034	-0.179279	-3.52089	0.0126063
AC097468.2	0.246784	2.48634	3.6293	0.00043186	0.0207327	-0.190617	3.51981	0.0126242
DLGAP1-AS4	-0.468855	3.24107	-3.62923	0.000436483	0.0207826	-0.27896	-3.51698	0.0126546
AC006480.2	-0.260171	3.91953	-3.62556	0.000439037	0.0207826	-0.301036	-3.51543	0.0126546
PCDHB7	0.444298	1.01089	3.62454	0.000441014	0.0207826	-0.136094	3.51424	0.0126546
AC007014.1	-0.375182	3.74313	-3.62478	0.00044152	0.0207826	-0.26724	-3.51394	0.0126546
MTA3	-0.171127	5.79032	-3.62751	0.00044282	0.0207826	-0.410139	-3.51315	0.0126546
LINC00534	-0.331129	2.67525	-3.62705	0.000444065	0.0207826	-0.211988	-3.51241	0.0126546
AC009264.1	0.89193	2.70006	3.62103	0.000444146	0.0207826	-0.203239	3.51236	0.0126546
LINC01494	-0.389998	4.4592	-3.62482	0.000444821	0.0207826	-0.352342	-3.51196	0.0126546
SLC25A15	-0.359776	2.62367	-3.62081	0.000445198	0.0207826	-0.210846	-3.51173	0.0126546
Z99758.1	-0.450908	1.76152	-3.62445	0.000446013	0.0207826	-0.146683	-3.51125	0.0126546
CCDC15	0.299754	3.8538	3.61952	0.000446219	0.0207826	-0.329262	3.51112	0.0126546
RAPH1	-0.264018	6.93903	-3.62102	0.000446752	0.0207826	-0.458894	-3.5108	0.0126546
ZMAT1	0.255014	5.79771	3.61662	0.000451507	0.020877	-0.460927	3.50799	0.012712
MMP25-AS1	-0.256451	4.2873	-3.61917	0.000453009	0.020877	-0.341526	-3.50711	0.012712
AC004834.1	0.34751	2.74578	3.61476	0.000453561	0.020877	-0.24951	3.50678	0.012712
AC092142.1	-0.434358	2.39303	-3.61468	0.000454256	0.020877	-0.216634	-3.50637	0.012712
RHOXF1-AS1	-0.344756	3.10699	-3.62079	0.000455075	0.020877	-0.325989	-3.5059	0.012712
AJ011931.1	0.387101	0.475704	3.6129	0.000456478	0.020877	-0.158282	3.50508	0.012712
ANKEF1	-0.503794	2.87319	-3.61287	0.000456898	0.020877	-0.229177	-3.50483	0.012712
CADM2-AS2	-0.403532	4.21393	-3.60922	0.000463777	0.0210817	-0.384898	-3.50085	0.0128367
CMTM2	-0.440897	1.51786	-3.61248	0.000463905	0.0210817	-0.178516	-3.50078	0.0128367
ERVMER61-1	-0.494496	0.969542	-3.61072	0.000466413	0.0210817	-0.179307	-3.49934	0.0128367
AL138799.4	-0.55745	5.81518	-3.60698	0.000466946	0.0210817	-0.464792	-3.49903	0.0128367
AL022345.4	0.707471	0.11418	3.60626	0.000467234	0.0210817	-0.239866	3.49887	0.0128367
AF127577.2	-0.344457	2.67203	-3.60705	0.000470128	0.0211593	-0.251305	-3.49722	0.0128839
AC097716.1	-0.54778	2.95875	-3.59936	0.000478273	0.0214112	-0.26193	-3.49264	0.0130373
AP001783.1	-0.491505	3.8906	-3.60182	0.000479546	0.0214112	-0.366657	-3.49193	0.0130373
CBR3	-0.664159	0.970806	-3.60021	0.000480675	0.0214112	-0.222833	-3.4913	0.0130373
LINC01697	-1.4176	1.03679	-3.59944	0.000481213	0.0214112	-0.224211	-3.491	0.0130373
CHKB	-0.217522	5.42581	-3.59991	0.000483713	0.0214112	-0.475696	-3.48962	0.0130373
THEM4	0.17306	5.36588	3.59861	0.000484013	0.0214112	-0.486194	3.48945	0.0130373
PKD2L2	-0.36101	3.34712	-3.59728	0.000485181	0.0214112	-0.326332	-3.48881	0.0130373
AL390242.1	-0.383608	2.42635	-3.59694	0.000485988	0.0214112	-0.262209	-3.48836	0.0130373
ASB14	-0.344555	4.07775	-3.59459	0.000489121	0.0214112	-0.389859	-3.48664	0.0130373
AC026304.1	0.465329	1.20755	3.59412	0.00049042	0.0214112	-0.226776	3.48594	0.0130373
AJ239328.1	0.517084	2.86201	3.59164	0.00049155	0.0214112	-0.354973	3.48532	0.0130373
NR3C1	0.220922	4.69927	3.60021	0.000492827	0.0214112	-0.44571	3.48463	0.0130373
TDP1	0.285878	3.19132	3.5907	0.000492997	0.0214112	-0.369253	3.48453	0.0130373
AC023632.2	0.226834	3.83929	3.59284	0.000493316	0.0214112	-0.404948	3.48436	0.0130373
OMG	-0.420598	4.81841	-3.59343	0.000493564	0.0214112	-0.460337	-3.48423	0.0130373
NPIPB12	0.474839	0.491712	3.58805	0.000497217	0.0215178	-0.23057	3.48225	0.0131022
AC099520.1	-0.543853	5.32625	-3.59048	0.000499552	0.021567	-0.507666	-3.481	0.0131322
GTF2IRD2	-0.319486	4.51508	-3.58511	0.000505858	0.021787	-0.448842	-3.47764	0.0132661
RBM26-AS1	0.313438	3.57653	3.58185	0.000508553	0.0217991	-0.40829	3.47621	0.0132735
AL592430.1	-0.383361	4.2567	-3.58759	0.000508923	0.0217991	-0.473124	-3.47602	0.0132735
CCNA2	0.360955	1.77899	3.58139	0.000509771	0.0217991	-0.296138	3.47557	0.0132735
SLFNL1-AS1	-0.318382	4.16439	-3.57704	0.00052055	0.0222052	-0.470353	-3.46995	0.0135208
AP001825.1	-0.525651	8.97295	-3.57657	0.000522019	0.0222052	-0.620851	-3.4692	0.0135208
AC131568.1	-0.387819	3.05347	-3.5738	0.000522969	0.0222052	-0.344271	-3.46871	0.0135208
RBMXL1	0.27941	3.16845	3.57552	0.000524517	0.0222186	-0.382598	3.46791	0.0135289
MEF2C	-0.431006	7.36601	-3.57059	0.000527893	0.022271	-0.632421	-3.46619	0.0135608
NPIPA5	0.411981	1.3175	3.56949	0.000529873	0.022271	-0.302207	3.46518	0.0135608
ITGA5	-0.430451	3.32475	-3.57073	0.000531082	0.022271	-0.383883	-3.46457	0.0135608
AL133334.1	-0.390937	3.65605	-3.57203	0.000532258	0.022271	-0.476784	-3.46397	0.0135608
LINC02848	0.422349	2.66728	3.56778	0.000532976	0.022271	-0.404427	3.46361	0.0135608
PPDPF	0.548541	4.94329	3.57166	0.000533809	0.022271	-0.491527	3.46319	0.0135608
AC016042.1	-0.520071	6.63137	-3.56865	0.000534953	0.022271	-0.614275	-3.46262	0.0135608
DUS4L	0.209498	3.23732	3.56673	0.000535652	0.022271	-0.41939	3.46226	0.0135608
ARMH4	-0.136034	6.01819	-3.56463	0.000538761	0.0223487	-0.622751	-3.46071	0.0136081
ANKRA2	0.166216	4.61595	3.56491	0.000542069	0.0224342	-0.540454	3.45906	0.0136602
AC002463.1	-0.387182	7.22449	-3.56316	0.000545811	0.0225372	-0.641323	-3.4572	0.0137229
DRAIC	0.71995	2.93544	3.56073	0.000547257	0.0225452	-0.418562	3.45649	0.0137278
CCDC22	-0.198656	3.29095	-3.55781	0.000551481	0.0226538	-0.425515	-3.45442	0.0137939
AC011466.3	-0.349585	1.96429	-3.5642	0.000553078	0.0226538	-0.343988	-3.45364	0.0137939
PRRT2	-0.23282	5.94694	-3.55742	0.000554453	0.0226538	-0.637852	-3.45297	0.0137939
EPRS	0.221353	5.8779	3.55565	0.00055553	0.0226538	-0.65162	3.45245	0.0137939
TTC19	-0.154677	7.23097	-3.56097	0.000556185	0.0226538	-0.660304	-3.45213	0.0137939
ANO8	-0.293527	2.74421	-3.55411	0.00055865	0.0227029	-0.422201	-3.45093	0.0138238
RHPN1	0.626517	0.0813144	3.55126	0.000564235	0.0228735	-0.376295	3.44825	0.0139277
AP000880.1	0.443304	0.765307	3.55042	0.000565844	0.0228735	-0.351387	3.44748	0.0139277
AL139807.1	-0.40219	3.20657	-3.55049	0.000566661	0.0228735	-0.498575	-3.44709	0.0139277
NAXD	0.193505	3.74001	3.54827	0.000570734	0.0229031	-0.529669	3.44515	0.0139457
SH3BGR	0.318113	2.64024	3.54792	0.000572241	0.0229031	-0.440804	3.44444	0.0139457
AC018511.2	-0.379841	1.77823	-3.5502	0.000572943	0.0229031	-0.376018	-3.44411	0.0139457
MIS18A-AS1	0.450198	0.79023	3.54833	0.000573136	0.0229031	-0.363557	3.44402	0.0139457
ARHGAP27	0.303294	1.92084	3.54853	0.000575461	0.0229031	-0.3989	3.44292	0.0139457
ZFYVE19	0.289468	2.86502	3.54789	0.000575477	0.0229031	-0.438998	3.44292	0.0139457
TCEANC	0.258568	2.67113	3.54613	0.000576298	0.0229031	-0.456783	3.44253	0.0139457
RECQL5	0.199777	3.10984	3.54403	0.00058049	0.0229665	-0.497174	3.44057	0.0139843
HOOK2	-0.190739	7.19446	-3.54526	0.00058169	0.0229665	-0.707319	-3.44001	0.0139843
ANO4	0.765049	0.703125	3.54567	0.000581722	0.0229665	-0.371973	3.44	0.0139843
POGLUT2	0.362725	2.2639	3.54076	0.000584645	0.0230314	-0.441386	3.43864	0.0140239
AC067750.1	0.404792	1.1689	3.54192	0.000588181	0.0230382	-0.380066	3.43701	0.014028
AC139887.2	0.265867	5.77592	3.53894	0.000588487	0.0230382	-0.700395	3.43687	0.014028
SCYL1	-0.217106	4.32212	-3.54052	0.000588657	0.0230382	-0.568212	-3.43679	0.014028
GTSE1	0.454501	0.181579	3.53808	0.000591504	0.0230555	-0.408495	3.43548	0.0140385
CNTN4-AS1	-0.450868	3.46993	-3.53734	0.000592703	0.0230555	-0.564116	-3.43493	0.0140385
AC132803.1	-0.544409	4.64851	-3.53762	0.00059294	0.0230555	-0.644655	-3.43482	0.0140385
ZMYM4-AS1	-0.327109	4.41522	-3.53795	0.000595949	0.0231171	-0.603838	-3.43345	0.014076
GPR156	-0.51806	0.698748	-3.54013	0.000597091	0.0231171	-0.388293	-3.43293	0.014076
AL035658.1	-0.365732	2.90965	-3.53482	0.000599438	0.0231581	-0.474952	-3.43187	0.014101
RHBDD1	0.193799	6.0064	3.53209	0.000605373	0.0233373	-0.730094	3.4292	0.0142101
HEY2	0.562933	0.368028	3.53073	0.000607409	0.0233484	-0.420757	3.42828	0.0142169
AC015802.5	0.522686	-0.0669698	3.5292	0.000608255	0.0233484	-0.420727	3.42791	0.0142169
FANCL	0.181475	5.74746	3.52827	0.000611027	0.0234049	-0.731733	3.42667	0.0142513
AC025043.1	-0.308469	4.96677	-3.52872	0.000614377	0.0234497	-0.668374	-3.42519	0.0142785
AC005064.1	-0.44005	2.82938	-3.53105	0.000614801	0.0234497	-0.537729	-3.425	0.0142785
AC034231.1	0.465388	0.824742	3.52439	0.000617936	0.0234707	-0.431837	3.42362	0.0142913
TMEM17	-0.523701	3.59787	-3.52346	0.000619858	0.0234707	-0.569324	-3.42277	0.0142913
AL354740.1	-0.2742	4.49055	-3.52708	0.000620262	0.0234707	-0.660633	-3.4226	0.0142913
AC011405.1	-0.337275	2.91849	-3.52522	0.000620565	0.0234707	-0.505592	-3.42246	0.0142913
SNHG10	0.285999	4.19017	3.52328	0.000625953	0.0236248	-0.629506	3.42011	0.0143852
LINC01011	0.451802	2.12889	3.51989	0.000627415	0.0236304	-0.462496	3.41948	0.0143886
ZNF599	0.291011	1.77079	3.5159	0.000638343	0.0239075	-0.481572	3.41478	0.0145573
AC006262.1	0.381503	2.64513	3.51472	0.000638433	0.0239075	-0.569388	3.41474	0.0145573
APCDD1L	-0.429802	2.14068	-3.51457	0.000638756	0.0239075	-0.498622	-3.4146	0.0145573
ASH1L-AS1	0.348852	2.5348	3.51319	0.000644528	0.0240735	-0.527308	3.41215	0.0146584
EIF2D	0.162957	3.89193	3.51142	0.000650195	0.0242349	-0.660102	3.40976	0.0147566
CUL5	-0.124702	6.93049	-3.51573	0.000653116	0.0242935	-0.800105	-3.40854	0.0147923
AL024498.1	0.387678	1.19475	3.50649	0.000657896	0.0244208	-0.483203	3.40655	0.0148699
AC007384.1	-0.335524	4.80767	-3.50531	0.000659547	0.0244318	-0.736556	-3.40587	0.0148765
AC022469.2	-0.4432	3.49316	-3.50964	0.000665505	0.0244603	-0.699963	-3.40341	0.0148939
LINC01821	-1.18546	1.15907	-3.5019	0.000666718	0.0244603	-0.5268	-3.40291	0.0148939
ICE1	0.190866	6.29971	3.50285	0.000667599	0.0244603	-0.832227	3.40255	0.0148939
AC009097.1	-0.361949	3.15525	-3.50135	0.000668792	0.0244603	-0.584677	-3.40206	0.0148939
AC140725.1	-0.277206	3.54978	-3.50345	0.000669178	0.0244603	-0.653374	-3.40191	0.0148939
LINC02177	-0.691771	1.59904	-3.50129	0.000670091	0.0244603	-0.517472	-3.40153	0.0148939
AC093297.1	-0.492004	3.00595	-3.50058	0.000670964	0.0244603	-0.697941	-3.40118	0.0148939
RACGAP1	0.346656	2.85795	3.49945	0.000672371	0.0244603	-0.610525	3.4006	0.0148939
LINC01951	-0.660845	0.635149	-3.5012	0.000672545	0.0244603	-0.494671	-3.40053	0.0148939
ZBTB20-AS2	-0.363221	3.77681	-3.50087	0.000675808	0.0245294	-0.69002	-3.39921	0.014936
OSBPL5	-0.291281	4.93604	-3.49379	0.000687622	0.0248618	-0.783197	-3.39447	0.0151384
REEP3	-0.175767	6.45162	-3.49559	0.000687728	0.0248618	-0.845493	-3.39443	0.0151384
ZNHIT6	0.189265	5.40541	3.4966	0.000689677	0.0248823	-0.811878	3.39365	0.0151508
SDHAF3	0.245251	4.76672	3.49194	0.000695193	0.0250311	-0.779269	3.39147	0.0152415
AL035416.1	-0.370547	1.29582	-3.48947	0.000698772	0.0250768	-0.534837	-3.39006	0.0152693
AC025165.1	-0.521967	0.46164	-3.49246	0.000699533	0.0250768	-0.522941	-3.38976	0.0152693
LINC01731	0.594939	0.11458	3.48718	0.00070064	0.0250768	-0.549266	3.38933	0.0152693
POLQ	-0.51162	1.89352	-3.48583	0.000703822	0.0250882	-0.58837	-3.38809	0.0152762
AC118555.1	-0.437754	1.60316	-3.48996	0.000704513	0.0250882	-0.55859	-3.38782	0.0152762
POTEJ	0.490618	0.416462	3.48528	0.000705139	0.0250882	-0.530448	3.38757	0.0152762
UBOX5-AS1	-0.289769	4.1297	-3.48818	0.000708097	0.0251437	-0.753514	-3.38642	0.01531
LINC02381	-0.615381	-0.143543	-3.48307	0.000710396	0.0251757	-0.575832	-3.38554	0.0153295
ZBTB24	-0.24797	4.31383	-3.48451	0.00071202	0.0251837	-0.774614	-3.38491	0.0153344
ENTPD3-AS1	0.256935	4.82373	3.48178	0.000713482	0.0251859	-0.813812	3.38435	0.0153357
AC011290.1	0.383722	2.16591	3.48066	0.000718205	0.025303	-0.605281	3.38253	0.015407
DOP1B	-0.314274	4.83058	-3.47781	0.000723902	0.0253989	-0.834049	-3.38036	0.0154654
H2AFY2	-0.170847	5.21868	-3.47889	0.000726101	0.0253989	-0.84804	-3.37953	0.0154654
SPINK8	-0.313019	2.4594	-3.47998	0.000726151	0.0253989	-0.614335	-3.37951	0.0154654
TYW3	0.233645	5.06202	3.47592	0.000727806	0.0253989	-0.852111	3.37888	0.0154654
BTLA	0.5258	0.363566	3.47492	0.000730125	0.0253989	-0.561146	3.37801	0.0154654
TTTY14	0.959541	4.29004	3.47717	0.000731331	0.0253989	-0.595393	3.37756	0.0154654
DUSP16	-0.248264	5.16488	-3.47409	0.000732165	0.0253989	-0.87251	-3.37724	0.0154654
AL138831.1	0.549433	1.74295	3.47399	0.000732755	0.0253989	-0.577942	3.37702	0.0154654
KDM4D	0.227515	3.46572	3.47361	0.000733625	0.0253989	-0.749524	3.37669	0.0154654
AP002433.1	-0.362005	2.48463	-3.47476	0.000739234	0.0255432	-0.642758	-3.3746	0.0155533
PPP5C	0.185268	4.75012	3.47106	0.000740629	0.0255432	-0.847774	3.37408	0.0155533
KDM4A-AS1	-0.323154	4.77735	-3.47236	0.000744554	0.0256295	-0.845974	-3.37262	0.0156058
AC007098.1	-0.372307	5.95014	-3.47303	0.000746927	0.0256607	-0.891222	-3.37175	0.0156248
METTL2B	-0.206262	5.11004	-3.468	0.000749118	0.0256607	-0.877331	-3.37094	0.0156248
MANEA	0.252658	3.76676	3.46688	0.00075094	0.0256607	-0.783992	3.37027	0.0156248
RHBDL2	-0.453295	3.8241	-3.46949	0.000751444	0.0256607	-0.768195	-3.37009	0.0156248
AC027018.1	-0.364743	5.64589	-3.46698	0.0007538	0.0256607	-0.901911	-3.36922	0.0156248
C5orf51	0.190073	3.97168	3.46775	0.000754015	0.0256607	-0.801336	3.36915	0.0156248
AC105383.1	0.402246	2.69926	3.46465	0.000757073	0.0256854	-0.722711	3.36803	0.0156398
AC116362.1	-0.526471	6.64793	-3.47071	0.000757729	0.0256854	-0.919444	-3.36779	0.0156398
NAGLU	-0.315588	3.73892	-3.46439	0.000759019	0.0256854	-0.79012	-3.36732	0.0156398
U91328.1	0.476278	0.386301	3.46125	0.000764462	0.0257346	-0.613359	3.36535	0.0156698
RASGRP1	-0.356483	4.52771	-3.46304	0.000765724	0.0257346	-0.863331	-3.3649	0.0156698
OR2M4	-0.561727	1.91499	-3.46115	0.000766289	0.0257346	-0.63716	-3.36469	0.0156698
FMO5	-0.327626	3.69613	-3.46665	0.000767184	0.0257346	-0.803659	-3.36437	0.0156698
AC005037.1	-0.224764	5.07425	-3.4629	0.000768957	0.0257346	-0.885455	-3.36373	0.0156698
RAB6A	-0.179539	6.89025	-3.45943	0.00076905	0.0257346	-0.972443	-3.3637	0.0156698
INE1	-0.483983	0.687492	-3.46165	0.000771547	0.0257702	-0.613913	-3.36281	0.0156915
SPATA4	0.570702	-0.0288108	3.4573	0.000774568	0.0258232	-0.630961	3.36173	0.0157238
AL160314.2	0.396814	4.0388	3.45448	0.000781951	0.0259685	-0.833206	3.35911	0.0158122
TTLL9	0.321056	3.05958	3.4547	0.000782402	0.0259685	-0.752544	3.35895	0.0158122
AC009090.6	-0.383297	0.999738	-3.45862	0.000784799	0.0259685	-0.634984	-3.3581	0.0158122
AL354949.1	-0.430602	3.81779	-3.45536	0.000785627	0.0259685	-0.776374	-3.35781	0.0158122
CADM2-AS1	-0.382756	3.80448	-3.45684	0.000788961	0.0259685	-0.850623	-3.35664	0.0158122
ITGB1-DT	0.277344	2.29043	3.45134	0.000790244	0.0259685	-0.708604	3.35619	0.0158122
HHLA3	0.410303	2.83499	3.45119	0.000790549	0.0259685	-0.736097	3.35608	0.0158122
EPC1	-0.116804	7.67677	-3.45173	0.000791333	0.0259685	-1.01544	-3.35581	0.0158122
AL161757.4	-0.394788	8.28181	-3.45335	0.000793435	0.0259685	-0.994033	-3.35507	0.0158122
AL138999.2	-0.585426	1.82669	-3.45017	0.000794736	0.0259685	-0.64162	-3.35462	0.0158122
TEK	0.593121	0.644409	3.44993	0.000794791	0.0259685	-0.637457	3.3546	0.0158122
SERPIND1	-0.418507	2.28295	-3.44747	0.000803057	0.026191	-0.713405	-3.35174	0.0159477
LINC01309	-0.540002	1.36872	-3.44577	0.000805371	0.026219	-0.653599	-3.35094	0.0159648
AC108156.1	-0.469518	0.457883	-3.45073	0.000807682	0.0262468	-0.643614	-3.35015	0.0159817
PIAS1	-0.209551	7.98915	-3.44398	0.000813192	0.0263782	-1.04412	-3.34827	0.0160617
AC245187.2	-0.641677	0.550554	-3.43829	0.000825354	0.0267245	-0.6658	-3.34415	0.0162726
VMA21	0.312924	4.20386	3.44041	0.00082937	0.0268051	-0.883529	3.3428	0.0163217
FOXP4	0.32966	2.1685	3.43631	0.000830821	0.0268051	-0.722001	3.34232	0.0163217
AC023480.1	-0.325552	4.3675	-3.43778	0.000833044	0.0268288	-0.931292	-3.34158	0.0163361
CBR3-AS1	-0.462705	2.59603	-3.43543	0.000835535	0.026861	-0.732314	-3.34075	0.0163557
CAPN3	0.306992	2.41661	3.43329	0.00083937	0.0269361	-0.803101	3.33947	0.0164014
AL136366.1	-0.439561	3.47617	-3.43429	0.000842885	0.0270008	-0.872794	-3.33831	0.0164408
AC007216.3	-0.342587	1.64432	-3.43202	0.000847992	0.0271162	-0.697018	-3.33664	0.016511
MALRD1	0.714762	2.53353	3.42826	0.000853404	0.0272408	-0.834236	3.33487	0.016587
JAKMIP2-AS1	-0.318012	4.66985	-3.42801	0.000858344	0.02735	-0.958655	-3.33326	0.0166534
ZNF597	0.310473	1.18741	3.42269	0.000869931	0.0276253	-0.736688	3.32953	0.0168211
UPK1B	-0.732779	0.632819	-3.42233	0.000870385	0.0276253	-0.711767	-3.32938	0.0168211
AL160291.1	0.564312	0.699026	3.42192	0.000871587	0.0276253	-0.720373	3.329	0.0168211
BOD1	0.361375	4.49008	3.42477	0.000875268	0.0276932	-0.940318	3.32783	0.0168624
AC092378.1	-0.706735	0.851731	-3.4225	0.000880485	0.02778	-0.737199	-3.32617	0.0169152
EXOSC2	0.189059	3.17834	3.41889	0.000881095	0.02778	-0.8797	3.32598	0.0169152
STPG1	0.157686	4.47875	3.41915	0.000885222	0.0278613	-0.985773	3.32467	0.0169648
AL451123.1	-0.470648	0.926608	-3.41625	0.000890542	0.0279107	-0.740406	-3.323	0.0169949
CEMIP	-0.444595	4.34717	-3.41935	0.000890785	0.0279107	-1.00354	-3.32293	0.0169949
FGF12-AS3	-0.467853	0.501122	-3.42053	0.000891444	0.0279107	-0.729806	-3.32272	0.0169949
ADAMTSL3	-0.414018	2.0115	-3.41271	0.000898832	0.0280383	-0.812469	-3.32042	0.0170726
RANBP3	0.184772	4.53144	3.41233	0.000899779	0.0280383	-1.01554	3.32012	0.0170726
SPATS2	-0.154777	7.3071	-3.41522	0.000902226	0.0280383	-1.11285	-3.31936	0.0170726
KIF15	0.242962	1.90877	3.41141	0.000902516	0.0280383	-0.813879	3.31927	0.0170726
MSH4	0.642115	2.08372	3.41115	0.000903307	0.0280383	-0.832705	3.31903	0.0170726
AC021915.2	-0.490188	3.34402	-3.41284	0.000907017	0.028105	-0.965849	-3.31789	0.0171132
MUC6	-0.520882	2.18394	-3.40815	0.0009163	0.0283439	-0.804615	-3.31504	0.0172586
AC009228.1	-0.287406	2.2268	-3.40516	0.000922092	0.0284742	-0.824001	-3.31328	0.0173379
RBM11	0.275428	3.49603	3.40653	0.000925546	0.0285319	-0.936351	3.31223	0.0173731
YAE1	0.198114	4.79025	3.40271	0.000935047	0.0287755	-1.05503	3.30937	0.0175214
AC008067.1	-0.397563	3.71651	-3.40027	0.000940746	0.0288701	-0.960872	-3.30767	0.017579
AC092119.2	0.406669	1.19129	3.3999	0.00094133	0.0288701	-0.789382	3.3075	0.017579
MEP1B	-0.300666	4.01492	-3.39878	0.000944004	0.0289029	-1.02344	-3.3067	0.017599
ZNF616	0.22783	3.23039	3.39477	0.000954814	0.0291702	-0.95766	3.30351	0.0177618
AL442071.2	-0.394227	1.68671	-3.39517	0.000958376	0.0291702	-0.819894	-3.30247	0.0177618
AC023136.1	-0.435	5.06617	-3.39516	0.000958764	0.0291702	-1.08651	-3.30236	0.0177618
Z97987.1	-0.455719	0.666743	-3.39831	0.000959216	0.0291702	-0.791278	-3.30222	0.0177618
PRSS23	-0.353059	3.17624	-3.39253	0.000961108	0.0291764	-0.926881	-3.30167	0.0177655
AP4B1	0.249892	3.40152	3.39192	0.00096266	0.0291764	-0.976449	3.30122	0.0177655
AC025034.1	-0.292789	3.23256	-3.39473	0.000968999	0.0293191	-1.00714	-3.29938	0.0178524
MYCBP2-AS1	-0.282135	5.64739	-3.39415	0.000973838	0.0294161	-1.12734	-3.29798	0.0179115
NR5A2	-0.63978	-0.0321794	-3.38986	0.000978528	0.0294632	-0.833906	-3.29663	0.0179402
AC106818.2	-0.307133	4.56653	-3.39012	0.000978937	0.0294632	-1.06139	-3.29651	0.0179402
FAM114A2	0.158999	3.86335	3.38642	0.000980307	0.0294632	-1.04016	3.29612	0.0179402
RPA2	0.212807	4.54537	3.38883	0.000984632	0.0295268	-1.0573	3.29488	0.0179789
HIST2H2AA4	1.23641	-0.359113	3.38495	0.000985703	0.0295268	-0.887327	3.29458	0.0179789
UBE2QL1	0.286172	4.36679	3.38535	0.000987974	0.0295457	-1.08758	3.29393	0.0179904
SF3A1	0.279339	3.8832	3.38535	0.000990473	0.0295713	-1.03277	3.29322	0.018006
EMG1	0.169716	3.75507	3.38293	0.000993186	0.0296032	-1.01398	3.29245	0.0180254
ZNF552	-0.268321	4.41477	-3.38329	0.000996261	0.0296458	-1.07009	-3.29158	0.0180513
LYG2	-0.34385	3.51575	-3.3826	0.00100012	0.0296499	-0.971392	-3.29049	0.0180538
AC069549.1	-0.413946	1.71854	-3.38402	0.00100105	0.0296499	-0.897776	-3.29023	0.0180538
AC107214.1	-0.191251	5.48913	-3.3814	0.00100183	0.0296499	-1.15626	-3.29001	0.0180538
PLN	-0.356752	2.12841	-3.381	0.00100372	0.0296499	-0.913305	-3.28948	0.0180538
AL591242.1	-0.400292	3.93526	-3.38161	0.00100464	0.0296499	-1.09249	-3.28923	0.0180538
SDF2L1	0.631093	1.7046	3.38113	0.00100796	0.0296994	-0.858157	3.2883	0.018084
SLC26A10	-0.316004	2.86108	-3.37783	0.00101062	0.029729	-0.979091	-3.28755	0.018102
LINC00106	-0.269294	4.58043	-3.37772	0.00101337	0.0297614	-1.11238	-3.28679	0.0181217
UCHL5	0.209076	5.19527	3.37582	0.00102181	0.0299286	-1.16335	3.28445	0.0182235
AC011997.2	-0.442229	1.18836	-3.37671	0.00102239	0.0299286	-0.88053	-3.28429	0.0182235
CCDC34	0.315561	2.96131	3.37152	0.00103235	0.0301712	-0.978623	3.28156	0.0183713
TIMMDC1	0.157008	4.97385	3.37407	0.00103408	0.0301726	-1.14812	3.28109	0.0183721
AL139021.1	-0.261978	4.23356	-3.37127	0.00103818	0.0302433	-1.10687	-3.27997	0.0184151
CLPTM1L	0.275771	2.7011	3.36556	0.00105011	0.0305129	-1.01248	3.27675	0.0185793
DMAC1	0.334645	4.18575	3.36824	0.00105083	0.0305129	-1.08217	3.27655	0.0185793
SFXN2	-0.307056	3.65	-3.364	0.00106179	0.0306975	-1.05246	-3.27362	0.0186917
AC138649.1	0.234434	3.64702	3.36368	0.00106224	0.0306975	-1.06916	3.2735	0.0186917
MCEE	0.171291	3.88425	3.36202	0.0010623	0.0306975	-1.11028	3.27349	0.0186917
AP000462.1	-0.466178	8.8393	-3.35979	0.00107525	0.0310219	-1.28426	-3.27006	0.0188893
FXN	0.164371	4.1411	3.35702	0.00107988	0.0311002	-1.14012	3.26884	0.0189369
TCF4-AS1	-0.359355	4.37792	-3.35732	0.00108141	0.0311002	-1.15256	-3.26844	0.0189369
OSMR	-0.390422	0.506249	-3.36119	0.0010855	0.031168	-0.896375	-3.26737	0.0189782
ACMSD	-0.342602	3.13096	-3.35633	0.00108902	0.0311915	-1.05161	-3.26646	0.0189925
DRP2	0.353197	2.88032	3.35486	0.00109043	0.0311915	-1.03102	3.26609	0.0189925
AC020913.1	-0.39891	1.6843	-3.35601	0.00109152	0.0311915	-0.936928	-3.26581	0.0189925
CHAC2	-0.339498	3.66587	-3.35342	0.00109618	0.0312338	-1.06783	-3.2646	0.0190183
AC108159.1	-0.412829	2.28527	-3.35218	0.00109867	0.0312338	-0.979272	-3.26396	0.0190183
CCDC59	0.360929	4.64356	3.35411	0.00109927	0.0312338	-1.18183	3.2638	0.0190183
CCDC192	-0.543253	2.62402	-3.35648	0.00109994	0.0312338	-1.00557	-3.26363	0.0190183
AC021205.3	0.329541	0.905043	3.3461	0.00111921	0.031731	-0.946198	3.25871	0.019321
AC069431.1	0.717107	-0.46	3.34486	0.00112433	0.0318258	-0.970827	3.25741	0.0193788
VPS26B	0.145903	4.82253	3.34415	0.0011282	0.0318854	-1.23284	3.25644	0.019415
NAALADL2-AS2	-0.442112	0.62333	-3.34435	0.0011343	0.0319638	-0.937153	-3.2549	0.0194628
BCL6	0.380784	4.78911	3.34255	0.00113463	0.0319638	-1.24774	3.25482	0.0194628
DPYD-AS1	-0.432208	4.21718	-3.34147	0.0011363	0.0319638	-1.20569	-3.2544	0.0194628
COX18	0.159004	3.79695	3.34304	0.00114078	0.0320029	-1.1528	3.25329	0.0194866
ST7-AS2	-0.439749	6.31844	-3.3417	0.00114137	0.0320029	-1.29778	-3.25314	0.0194866
WNT2B	-0.246528	3.75239	-3.33966	0.00114303	0.0320029	-1.15889	-3.25273	0.0194866
GTSCR1	-0.450747	1.35057	-3.34155	0.00114925	0.0320524	-0.970856	-3.25119	0.0195167
CHMP1A	0.376534	3.78403	3.33766	0.00115057	0.0320524	-1.13843	3.25086	0.0195167
AL356776.2	0.392059	1.03045	3.33739	0.00115152	0.0320524	-0.95237	3.25062	0.0195167
MTCP1	-0.300953	4.44526	-3.34251	0.00115191	0.0320524	-1.21621	-3.25053	0.0195167
DDX11-AS1	0.353596	1.78643	3.33548	0.00115876	0.0321631	-1.03223	3.24884	0.0195841
AC007262.2	0.433739	2.67331	3.33543	0.00115947	0.0321631	-1.11405	3.24867	0.0195841
ADAP2	0.295342	3.49273	3.33336	0.00116862	0.0323203	-1.15434	3.24643	0.0196798
AC069228.1	-0.455666	8.21411	-3.33426	0.00117024	0.0323203	-1.35305	-3.24604	0.0196798
KCNMB2-AS1	-0.330446	6.37568	-3.33568	0.0011736	0.0323203	-1.32704	-3.24522	0.0196798
INO80-AS1	-0.337249	3.18925	-3.33541	0.00117387	0.0323203	-1.10195	-3.24515	0.0196798
CENPE	0.25957	3.42753	3.33118	0.00117513	0.0323203	-1.16916	3.24485	0.0196798
RGMB	0.352885	1.98139	3.33582	0.0011759	0.0323203	-1.01413	3.24466	0.0196798
CCDC150	0.293962	2.42839	3.32805	0.00118718	0.0325806	-1.08869	3.24194	0.0198383
ZBTB21	0.314842	3.61415	3.32677	0.00119474	0.0326603	-1.19309	3.24013	0.0198869
AC104532.2	-0.344332	2.3399	-3.32593	0.00119625	0.0326603	-1.04134	-3.23977	0.0198869
AL645728.1	0.3992	1.42878	3.32523	0.00119821	0.0326603	-1.00349	3.23931	0.0198869
HORMAD2-AS1	-0.569256	0.137119	-3.3251	0.00119866	0.0326603	-0.995064	-3.2392	0.0198869
LEMD1-AS1	-0.551387	0.671546	-3.326	0.0011993	0.0326603	-0.988079	-3.23905	0.0198869
HIST1H1E	0.693036	2.31802	3.32884	0.00120097	0.0326603	-1.09325	3.23865	0.0198869
AC025917.1	-0.311985	2.4794	-3.32709	0.00120338	0.0326616	-1.07799	-3.23808	0.0198877
GABRA6	-0.505561	0.78337	-3.32374	0.00120608	0.0326616	-0.991672	-3.23744	0.0198877
AC114939.1	-0.479853	1.20823	-3.32485	0.00120646	0.0326616	-1.01421	-3.23735	0.0198877
AL022322.2	-0.381061	2.20129	-3.32388	0.00120895	0.0326799	-1.0471	-3.23676	0.0198988
TCF7	-0.356132	4.51092	-3.32142	0.00121327	0.0327473	-1.2318	-3.23574	0.0199398
CADPS2	-0.670029	4.458	-3.32224	0.00121773	0.0327731	-1.25157	-3.23469	0.0199555
PSPH	0.294971	3.15163	3.32025	0.00121786	0.0327731	-1.16225	3.23466	0.0199555
SV2C	-0.5979	2.61495	-3.32148	0.00122663	0.0329597	-1.11892	-3.23261	0.0200692
AJ006995.1	-1.35365	-1.51679	-3.31672	0.00123605	0.0331634	-1.10029	-3.23043	0.0201932
ALG10B	0.288478	3.36611	3.31756	0.00123942	0.0332043	-1.22159	3.22965	0.0202181
AC090579.1	-0.472244	7.79862	-3.31474	0.00125015	0.0334419	-1.39744	-3.22718	0.0203628
AC092338.2	-0.316832	2.38549	-3.31199	0.00125244	0.0334535	-1.07807	-3.22666	0.0203698
AC018697.1	-0.407875	2.72455	-3.31023	0.00125843	0.0335256	-1.19738	-3.22529	0.0204137
RASA4B	-0.365533	4.78462	-3.31256	0.00125886	0.0335256	-1.31654	-3.2252	0.0204137
AC008728.1	-0.358318	2.581	-3.31125	0.0012689	0.0336723	-1.17246	-3.22292	0.0205031
AL139317.1	-0.419716	0.50472	-3.30733	0.00126995	0.0336723	-1.03041	-3.22268	0.0205031
CALML3-AS1	0.461706	0.965842	3.3071	0.00127176	0.0336723	-1.04413	3.22228	0.0205031
SNRPB2	0.245399	4.59796	3.31255	0.00127185	0.0336723	-1.29324	3.22226	0.0205031
MAN2A1	0.481217	2.56909	3.30637	0.00127498	0.033675	-1.18096	3.22155	0.0205047
NPIPB2	0.619394	2.82213	3.30863	0.00127569	0.033675	-1.15369	3.22139	0.0205047
NT5DC3	0.499361	1.89172	3.30452	0.00128175	0.0337853	-1.09216	3.22003	0.0205719
AC068282.1	-0.353659	6.13958	-3.30159	0.00129415	0.0340378	-1.41802	-3.21727	0.0207257
LINC02284	-0.39395	4.07982	-3.30143	0.00129511	0.0340378	-1.32043	-3.21706	0.0207257
AC012178.1	-0.616169	3.57281	-3.29977	0.00130149	0.0341182	-1.31758	-3.21565	0.0207746
NAP1L4	0.16634	6.6297	3.3018	0.00130196	0.0341182	-1.44276	3.21555	0.0207746
BTBD18	-0.317707	2.45338	-3.2992	0.00130931	0.0342609	-1.15126	-3.21393	0.0208615
ZFAND5	0.280012	6.14149	3.30025	0.00131612	0.0343891	-1.43803	3.21244	0.0209396
ZNF518A	0.209079	7.37366	3.29453	0.00132379	0.0344633	-1.49135	3.21077	0.0209847
AC008537.4	-0.354853	2.05093	-3.29574	0.00132554	0.0344633	-1.11008	-3.21039	0.0209847
TRPM3	-0.322227	6.87135	-3.29483	0.00132615	0.0344633	-1.46565	-3.21026	0.0209847
PCDHA9	0.418462	1.3287	3.29373	0.00132774	0.0344633	-1.12318	3.20991	0.0209847
HPGD	0.459427	3.41146	3.29339	0.00133038	0.0344633	-1.26204	3.20934	0.0209847
ANAPC1	0.14431	5.15424	3.29356	0.00133044	0.0344633	-1.4147	3.20933	0.0209847
TTC21B-AS1	-0.399478	3.22831	-3.29462	0.00133464	0.0345152	-1.276	-3.20843	0.0210163
AC006504.2	-0.573109	1.50338	-3.29163	0.00133628	0.0345152	-1.10369	-3.20807	0.0210163
TRIM69	0.24905	3.46623	3.29263	0.00133923	0.0345417	-1.25251	3.20744	0.0210325
NUP50	0.179618	4.09098	3.29128	0.00134185	0.0345598	-1.34829	3.20688	0.0210435
AP001011.1	-0.381287	6.85401	-3.29117	0.00134888	0.0346805	-1.45255	-3.20537	0.021117
LIPT1	0.352268	2.02735	3.28984	0.00135039	0.0346805	-1.15151	3.20505	0.021117
AL031714.1	-0.471369	0.677287	-3.28909	0.00135456	0.034694	-1.08874	-3.20416	0.0211252
GTF3C3	0.176027	4.70255	3.28748	0.00135477	0.034694	-1.40952	3.20412	0.0211252
AC007036.1	-0.650981	-0.153119	-3.28683	0.00136047	0.0347905	-1.09926	-3.20291	0.021184
GRAMD2B	-0.413088	5.66028	-3.2876	0.00136264	0.0347965	-1.44112	-3.20245	0.0211876
TMEM168	-0.161298	6.7197	-3.28686	0.00136757	0.0348268	-1.48367	-3.20141	0.0212061
AC016642.1	-0.385713	3.75907	-3.28855	0.00137062	0.0348268	-1.33661	-3.20077	0.0212061
SCAT2	-0.352561	3.1017	-3.28524	0.00137314	0.0348268	-1.2562	-3.20024	0.0212061
PDRG1	0.305933	3.44849	3.28536	0.00137338	0.0348268	-1.25504	3.20019	0.0212061
AC019080.5	-0.44705	0.250243	-3.28555	0.0013735	0.0348268	-1.09854	-3.20016	0.0212061
MTUS2-AS2	-0.38788	2.50999	-3.28065	0.00138453	0.0350225	-1.21806	-3.19786	0.0213252
AL137017.1	-0.463596	5.06884	-3.28266	0.0013851	0.0350225	-1.43491	-3.19774	0.0213252
TSPEAR	1.43091	0.000304185	3.27996	0.00138773	0.0350397	-1.11117	3.19719	0.0213357
LINC01002	0.34163	1.41487	3.27889	0.00139268	0.0351154	-1.19337	3.19616	0.0213818
AC009501.3	-0.267745	4.20279	-3.28031	0.00139575	0.0351223	-1.39164	-3.19553	0.021386
SPATA17	0.451991	1.05706	3.27925	0.0013994	0.0351223	-1.12803	3.19478	0.021386
SMC2-AS1	0.482429	0.54528	3.27863	0.00140081	0.0351223	-1.11885	3.19448	0.021386
AC015795.1	-0.402873	1.85955	-3.281	0.00140098	0.0351223	-1.16341	-3.19445	0.021386
ARRDC3-AS1	0.334302	2.69462	3.27639	0.00140442	0.0351223	-1.24763	3.19374	0.021386
USP3-AS1	-0.257801	6.19902	-3.27861	0.00140466	0.0351223	-1.48783	-3.19369	0.021386
AC091271.1	0.376547	3.3284	3.27619	0.00141078	0.0352264	-1.28272	3.19244	0.0214494
AL157369.1	-0.430482	0.724829	-3.27438	0.0014133	0.0352406	-1.13427	-3.19192	0.021458
PIGY-DT	0.457003	0.391384	3.27494	0.00141732	0.0352919	-1.1307	3.1911	0.0214893
AC211433.1	-0.404635	7.08164	-3.2741	0.00142293	0.0353827	-1.50734	-3.18996	0.0215446
AC022679.2	-0.414267	2.25821	-3.27194	0.00142756	0.0354487	-1.20407	-3.18902	0.0215847
AC013733.1	-0.724416	-0.0158654	-3.2688	0.00144249	0.0357192	-1.1426	-3.18601	0.0217495
ENTPD7	-0.260801	2.68812	-3.26729	0.00144549	0.0357192	-1.27176	-3.18541	0.0217495
C6orf132	-0.626465	0.11379	-3.2685	0.0014458	0.0357192	-1.16246	-3.18535	0.0217495
CNPY2	-0.211179	5.89268	-3.27003	0.00144639	0.0357192	-1.50614	-3.18523	0.0217495
AC023790.2	0.431451	1.18435	3.26505	0.00145657	0.0359213	-1.16119	3.1832	0.0218725
CRACR2B	-0.558385	1.65828	-3.26559	0.00146082	0.0359769	-1.16259	-3.18236	0.0219063
AL355488.1	0.314949	1.81871	3.26363	0.00146637	0.0360644	-1.26105	3.18126	0.0219596
NSFL1C	0.167239	5.31963	3.26283	0.00148335	0.0363682	-1.49143	3.17792	0.0221446
FAM193B	0.153937	5.0777	3.25901	0.00148452	0.0363682	-1.52064	3.17769	0.0221446
AP003392.1	-0.334412	2.71111	-3.25979	0.00148479	0.0363682	-1.2837	-3.17764	0.0221446
ITGA4	0.329691	2.55364	3.25789	0.00149067	0.0364627	-1.30112	3.17649	0.0222021
TEX261	0.286977	2.9441	3.25655	0.00149631	0.0365312	-1.32542	3.1754	0.0222439
ASMTL	-0.243797	4.56221	-3.25636	0.00149753	0.0365312	-1.46679	-3.17516	0.0222439
HAAO	-0.433914	1.14244	-3.25683	0.00150052	0.0365547	-1.19535	-3.17458	0.0222582
GTPBP4	0.193367	4.60696	3.25362	0.00151193	0.0367458	-1.48075	3.17238	0.0223746
ACTR2	-0.149298	6.48898	-3.25392	0.00151245	0.0367458	-1.58028	-3.17228	0.0223746
MTHFSD	0.174474	3.26199	3.25247	0.00152153	0.0369138	-1.37737	3.17055	0.0224768
ZNF724	0.263734	1.84811	3.25327	0.00152347	0.0369138	-1.23907	3.17018	0.0224768
ZFAND4	-0.147388	5.26932	-3.25594	0.00152883	0.0369916	-1.51751	-3.16916	0.0225242
LINC00963	0.404105	1.71669	3.24945	0.00153079	0.0369916	-1.24501	3.16878	0.0225242
AL359878.1	0.238188	1.90641	3.25306	0.00154075	0.03715	-1.25012	3.1669	0.0226206
LINC01500	0.569082	2.82475	3.24728	0.00154147	0.03715	-1.33811	3.16676	0.0226206
ADGRB1	0.273917	3.84163	3.24725	0.00154367	0.0371533	-1.45199	3.16635	0.0226227
TMC4	-0.295001	2.89062	-3.24673	0.00154881	0.0372091	-1.32201	-3.16538	0.0226567
TMEM38B	0.191844	5.10967	3.24553	0.00155012	0.0372091	-1.55474	3.16513	0.0226567
TADA2B	0.247638	3.70996	3.24449	0.00155527	0.0372831	-1.46179	3.16417	0.0227017
WDR73	-0.235623	5.50108	-3.24856	0.0015595	0.0373114	-1.54583	-3.16338	0.0227189
TP53TG1	0.282727	3.06994	3.24604	0.0015606	0.0373114	-1.34125	3.16317	0.0227189
RBM14	0.309917	4.75424	3.24305	0.00156281	0.0373148	-1.52867	3.16276	0.022721
AC005692.3	-0.430608	1.34359	-3.2457	0.0015674	0.0373378	-1.28606	-3.16191	0.022735
DLEU1	-0.321076	6.57843	-3.24197	0.00156793	0.0373378	-1.61758	-3.16181	0.022735
PCDHGA11	0.34706	0.866661	3.24116	0.00157401	0.0374332	-1.25449	3.16068	0.0227931
CCDC62	0.270191	3.23519	3.23952	0.0015829	0.0375948	-1.42158	3.15904	0.0228915
UTP18	0.16299	5.05777	3.23754	0.00159031	0.0377211	-1.57394	3.15768	0.0229684
LINC00685	-0.33603	4.261	-3.23861	0.00160122	0.03793	-1.47296	-3.15568	0.0230956
SNAP25-AS1	-0.356088	9.21185	-3.23508	0.00160788	0.0380376	-1.66931	-3.15447	0.0231611
BANP	0.214024	5.38303	3.23314	0.00161339	0.0380388	-1.60494	3.15347	0.0231618
NUDT21	0.207537	4.8208	3.23402	0.00161373	0.0380388	-1.56027	3.15341	0.0231618
KMT2B	-0.196838	4.25551	-3.2365	0.00161427	0.0380388	-1.50867	-3.15332	0.0231618
FUT10	0.192865	3.85671	3.22903	0.0016349	0.0384261	-1.51511	3.14961	0.0233977
ANKRD7	0.238859	4.80105	3.22936	0.00163613	0.0384261	-1.59206	3.14939	0.0233977
PMM2	0.198197	4.08118	3.22971	0.00164035	0.0384261	-1.52186	3.14863	0.0233977
AL450306.1	-0.421423	1.48987	-3.22843	0.00164126	0.0384261	-1.28235	-3.14847	0.0233977
MCM2	0.355131	0.885494	3.22751	0.0016421	0.0384261	-1.25185	3.14832	0.0233977
AC009365.4	-0.366054	1.81731	-3.2314	0.00164351	0.0384261	-1.32095	-3.14807	0.0233977
AP001372.2	0.262684	3.43886	3.22662	0.00164731	0.0384651	-1.45677	3.1474	0.0234214
AC068051.1	-0.392995	5.3797	-3.22851	0.00165709	0.0386433	-1.61543	-3.14567	0.0235299
LUC7L2	-0.140645	7.27244	-3.22555	0.00166188	0.0386554	-1.67853	-3.14482	0.0235373
AL031768.2	-0.324162	3.8922	-3.22421	0.00166191	0.0386554	-1.48796	-3.14482	0.0235373
XBP1	0.402297	3.80917	3.22277	0.0016772	0.0389609	-1.4702	3.14214	0.0237233
SLC25A28	0.215356	4.45623	3.22002	0.00168847	0.039172	-1.57431	3.14018	0.0238518
AC092567.1	-0.290161	5.28156	-3.21848	0.0016964	0.039258	-1.62403	-3.1388	0.0239042
ZNF564	0.225521	3.78965	3.21704	0.00169832	0.039258	-1.52522	3.13847	0.0239042
NBPF1	0.262448	3.63704	3.21993	0.00169872	0.039258	-1.50825	3.1384	0.0239042
LRP3	0.242316	3.41247	3.21537	0.00170976	0.03941	-1.4848	3.1365	0.0239968
CCDC142	-0.214363	2.98415	-3.21589	0.00171061	0.03941	-1.44781	-3.13636	0.0239968
OSER1-DT	0.231705	3.40654	3.21543	0.00171258	0.03941	-1.47287	3.13602	0.0239968
AC068756.1	-0.694289	0.192325	-3.21657	0.00171405	0.03941	-1.28888	-3.13577	0.0239968
AL035587.1	-0.246264	4.90847	-3.21192	0.00173077	0.0397438	-1.62694	-3.13292	0.0242
LRRC27	0.176843	3.2222	3.20963	0.00174061	0.0398832	-1.47888	3.13125	0.0242849
NFYB	0.240751	4.66752	3.21228	0.00174128	0.0398832	-1.59598	3.13114	0.0242849
RIC1	-0.149284	6.3066	-3.20872	0.00174367	0.0398872	-1.70957	-3.13074	0.0242874
AC091646.1	-0.329605	3.91164	-3.21081	0.00175764	0.0401559	-1.58143	-3.12839	0.0244509
DAP3	-0.128335	6.1437	-3.20938	0.00176004	0.0401597	-1.69898	-3.12799	0.0244533
AC106873.1	-0.421767	0.675021	-3.20477	0.001768	0.0402756	-1.31321	-3.12667	0.0245238
GVQW3	0.161307	4.56003	3.20607	0.00176959	0.0402756	-1.62575	3.1264	0.0245238
CIPC	0.189518	4.69032	3.20525	0.00178795	0.0406419	-1.62969	3.12337	0.0247469
AC015845.2	0.435295	1.64953	3.19954	0.00179537	0.0407591	-1.40517	3.12215	0.0248182
ZNF285	0.239894	2.59675	3.20099	0.00179862	0.0407815	-1.45711	3.12162	0.0248319
TMEM213	-0.608865	1.19066	-3.1974	0.00180716	0.0409236	-1.33741	-3.12022	0.0249184
MRVI1-AS1	0.392329	2.16407	3.19653	0.00181219	0.040986	-1.43403	3.1194	0.0249564
IL1RAPL2	0.457061	1.31581	3.19713	0.00181646	0.0410221	-1.40108	3.11871	0.0249784
FAM222A-AS1	-0.422248	5.44858	-3.19654	0.00181834	0.0410221	-1.69364	-3.1184	0.0249784
FAM221B	-0.34369	1.66564	-3.19644	0.00182264	0.0410676	-1.39872	-3.11771	0.0250061
C7orf69	-0.39548	1.75527	-3.19474	0.00182822	0.0411417	-1.4047	-3.11681	0.0250512
TECPR2	-0.167992	5.46419	-3.19768	0.00183203	0.041176	-1.70042	-3.11619	0.0250721
HYOU1	0.288686	3.27426	3.18954	0.00185309	0.0415976	-1.54398	3.11282	0.0253288
STAT2	-0.196804	4.95548	-3.19092	0.00185649	0.0416219	-1.68663	-3.11228	0.0253436
ATG4C	0.22619	4.95507	3.18814	0.00186098	0.0416272	-1.71697	3.11157	0.0253469
[truncated: 17,199 more rows]

## Sheet: HC age gender interaction DEG
	logFC	AveExpr	t	P.Value	adj.P.Val	B	z.std	qval
[truncated: 18,003 more rows]

## Sheet: AC age gender interaction DEG
	logFC	AveExpr	t	P.Value	adj.P.Val	B	z.std	qval
[truncated: 18,003 more rows]

[truncated: 2 more sheets: RGC age gender interaction DEG, MG age gender interaction DEG]
