# Supplementary material for: Integrated multi-omics single cell atlas of the human retina
Source: Research Square preprint supplement (doi:10.21203/rs.3.rs-3471275/v1), 2023-11-16
Supplement: Supplementary file 7 [file 549cf5a761adde89bdd62e51.xlsx]

## Sheet: BC
Table S8. Identified markers for BC, AC, and RGC by binary classifications
no.	majorclass	celltype	marker
1	BC	RB	C16orf74
2	BC	RB	CDHR3
3	BC	RB	ANOS1
4	BC	FMB	GRIK2
5	BC	FMB	NKAIN3
6	BC	OFFx	ARHGAP6
7	BC	DB1	ADCY8
8	BC	DB1	EBF1	Known
9	BC	DB1	KIT
10	BC	DB1	LAMA3
11	BC	DB1	PEX5L
12	BC	DB2	COL5A1	Known
13	BC	DB2	AC112178.1
14	BC	DB2	LNX2
15	BC	DB3a	ADGRL3
16	BC	DB3a	CALB1
17	BC	DB3a	DPP6	Known
18	BC	DB3a	AC011990.1
19	BC	DB3a	LINC01798
20	BC	DB3a	TMEM132B
21	BC	DB3b	C8orf34
22	BC	DB3b	MEIS2	Known
23	BC	IMB	AL589740.1
24	BC	IMB	CDH9
25	BC	IMB	RELN
26	BC	IMB	SLC35F4	Known
27	BC	GB	AGBL1
28	BC	GB	UTRN
29	BC	GB	RFTN1
30	BC	GB	SYN3
31	BC	GB	UST
32	BC	BB	CTNNA3
33	BC	BB	GPC3
34	BC	BB	LRRTM3
35	BC	BB	SORCS3
36	BC	BB	THSD7B
37	BC	DB4a	DIRC3
38	BC	DB4a	KCNJ3
39	BC	DB4a	LINC01915
40	BC	DB4a	PTPRK
41	BC	DB4b	NOS1AP
42	BC	DB5	CDH18
43	BC	DB5	COL19A1
44	BC	DB5	DOK5
45	BC	DB5	HDAC2-AS2
46	BC	DB5	HS3ST5
47	BC	DB6	AC012409.2
48	BC	DB6	AC040174.1
49	BC	DB6	C4orf19
50	BC	DB6	DEPTOR
51	BC	DB6	HERC5
52	BC	DB6	LRRC4C	Known
53	BC	DB6	NR2F2-AS1
54	BC	DB6	SULT1C4
55	BC	DB6	SYK

## Sheet: AC
no	majorclass	cluster	marker
1	AC	HAC1	IGF2BP2
2	AC	HAC2	SLC12A7
3	AC	HAC3	AC090138.1
4	AC	HAC4	PDGFRA
5	AC	HAC5	AC105411.1
6	AC	HAC6	CACNA2D1
7	AC	HAC7	PCDH10
8	AC	HAC8	LINC01170
9	AC	HAC9	ACTN2
10	AC	HAC10	ADAMTS18
11	AC	HAC11	CHEK1
12	AC	HAC12	ALDH1A2
13	AC	HAC13	ERVMER61-1
14	AC	HAC14	FREM1
15	AC	HAC15	LINC02267
16	AC	HAC16	LTBP1
17	AC	HAC17	PROM1
18	AC	HAC18	PKD2L1
19	AC	HAC19	HTR2C
20	AC	HAC20	ADAMTSL1
21	AC	HAC21	NRGN
22	AC	HAC22	VIPR2
23	AC	HAC23	RNF220
24	AC	HAC24	LINC02055
25	AC	HAC25	ANKFN1
26	AC	HAC26	SLC24A4
27	AC	HAC27	PTCHD1-AS
28	AC	HAC28	VIP
29	AC	HAC29	LINC01933
30	AC	HAC30	MYO10
31	AC	HAC31	SGCZ
32	AC	HAC32	NKAIN2
33	AC	HAC33	ARHGAP18
34	AC	HAC34	FRAS1
35	AC	HAC35	IL1RAPL2
36	AC	HAC36	SYT10
37	AC	HAC37	EOMES
38	AC	HAC38	SEMA3D
39	AC	HAC39	GLIS3
40	AC	HAC40	LRIG3
41	AC	HAC41	AC109466.1
42	AC	HAC42	ENPP1
43	AC	HAC43	PHACTR2
44	AC	HAC44	DCN
45	AC	HAC45	DOCK8
46	AC	HAC46	CHODL
47	AC	HAC47	SGCD
48	AC	HAC48	SMOC2
49	AC	HAC49	CASZ1
50	AC	HAC50	NRP2
51	AC	HAC51	TMEM132D
52	AC	HAC52	AQP4-AS1
53	AC	HAC53	PLCXD3
54	AC	HAC54	TRPM1
55	AC	HAC55	PKN2-AS1
56	AC	HAC56	SPOCK1
57	AC	HAC57	AC010997.3
58	AC	HAC58	THSD4
59	AC	HAC59	CADPS2
60	AC	HAC60	ELAVL2
61	AC	HAC61	HKDC1
62	AC	HAC62	SYNDIG1
63	AC	HAC63	ADRA1A
64	AC	HAC64	CACHD1
65	AC	HAC65	LINC00871
66	AC	HAC66	ADAMTS16
67	AC	HAC67	RBPMS
68	AC	HAC68	RAB31
69	AC	HAC69	LDLRAD4
70	AC	HAC70	LINC01541
71	AC	HAC71	KIAA1217
72	AC	HAC72	MIR137HG
73	AC	HAC73	FSTL5
74	AC	HAC74	AC008415.1

## Sheet: RGC
no.	majorclass	cluster	celltype	marker
1	RGC	HRGC1	MG_OFF	ADAMTSL3
2	RGC	HRGC1	MG_OFF	LIFR
3	RGC	HRGC1	MG_OFF	MAML2
4	RGC	HRGC1	MG_OFF	NLGN1
5	RGC	HRGC1	MG_OFF	PYGL
6	RGC	HRGC1	MG_OFF	SORCS1
7	RGC	HRGC1	MG_OFF	SOX6
8	RGC	HRGC1	MG_OFF	SVEP1
9	RGC	HRGC2	MG_ON	ACSL1
10	RGC	HRGC2	MG_ON	CRNDE
11	RGC	HRGC2	MG_ON	EBF2
12	RGC	HRGC2	MG_ON	EOMES
13	RGC	HRGC2	MG_ON	KANK4
14	RGC	HRGC2	MG_ON	LINC01697
15	RGC	HRGC2	MG_ON	SLIT3
16	RGC	HRGC2	MG_ON	SPATC1
17	RGC	HRGC2	MG_ON	ZNF536
18	RGC	HRGC3	HRGC3	VAV2
19	RGC	HRGC4	HRGC4	ABCA7
20	RGC	HRGC4	HRGC4	MC1R
21	RGC	HRGC5	HRGC5	ABI3BP
22	RGC	HRGC5	HRGC5	AC009623.1
23	RGC	HRGC5	HRGC5	ARG2
24	RGC	HRGC5	HRGC5	C1QTNF7
25	RGC	HRGC5	HRGC5	CC2D2A
26	RGC	HRGC5	HRGC5	CDCA2
27	RGC	HRGC5	HRGC5	CREB5
28	RGC	HRGC5	HRGC5	FAM184B
29	RGC	HRGC5	HRGC5	KLRD1
30	RGC	HRGC6	PG_OFF	AIM2
31	RGC	HRGC6	PG_OFF	C8orf34
32	RGC	HRGC6	PG_OFF	CDH4
33	RGC	HRGC6	PG_OFF	CHSY3
34	RGC	HRGC6	PG_OFF	COL24A1
35	RGC	HRGC6	PG_OFF	FHOD3
36	RGC	HRGC6	PG_OFF	FLRT2
37	RGC	HRGC6	PG_OFF	GALNT14
38	RGC	HRGC6	PG_OFF	KCNIP1
39	RGC	HRGC6	PG_OFF	KCNQ5
40	RGC	HRGC6	PG_OFF	MCC
41	RGC	HRGC6	PG_OFF	MGAT5B
42	RGC	HRGC6	PG_OFF	PLCL1
43	RGC	HRGC6	PG_OFF	SORCS3
44	RGC	HRGC6	PG_OFF	STXBP6
45	RGC	HRGC6	PG_OFF	TESC
46	RGC	HRGC6	PG_OFF	USH2A
47	RGC	HRGC6	PG_OFF	WWC1
48	RGC	HRGC7	PG_ON	AC005208.1
49	RGC	HRGC7	PG_ON	AC007563.2
50	RGC	HRGC7	PG_ON	ADRA1A
51	RGC	HRGC7	PG_ON	ARPP21
52	RGC	HRGC7	PG_ON	CDH8
53	RGC	HRGC7	PG_ON	CHRNA2
54	RGC	HRGC7	PG_ON	COL4A2
55	RGC	HRGC7	PG_ON	CTNNA3
56	RGC	HRGC7	PG_ON	DOCK10
57	RGC	HRGC7	PG_ON	IGFBP5
58	RGC	HRGC7	PG_ON	LRRTM3
59	RGC	HRGC7	PG_ON	MAN1A1
60	RGC	HRGC7	PG_ON	MAP3K5
61	RGC	HRGC7	PG_ON	SLC6A1
62	RGC	HRGC8	HRGC8	CDH20
63	RGC	HRGC8	HRGC8	NCKAP5
64	RGC	HRGC8	HRGC8	NETO1
65	RGC	HRGC8	HRGC8	TCF4
66	RGC	HRGC9	HRGC9	ACTN2
67	RGC	HRGC9	HRGC9	ACVR1
68	RGC	HRGC9	HRGC9	ARHGAP10
69	RGC	HRGC9	HRGC9	CREB5
70	RGC	HRGC9	HRGC9	ELL2
71	RGC	HRGC9	HRGC9	FNIP2
72	RGC	HRGC9	HRGC9	GAP43
73	RGC	HRGC9	HRGC9	HOMER1
74	RGC	HRGC9	HRGC9	HS3ST2
75	RGC	HRGC9	HRGC9	LURAP1L-AS1
76	RGC	HRGC9	HRGC9	NREP
77	RGC	HRGC9	HRGC9	SLC35F2
78	RGC	HRGC10	OPN4	AL445433.2
79	RGC	HRGC10	OPN4	CAMK2A
80	RGC	HRGC10	OPN4	CDH6
81	RGC	HRGC10	OPN4	CHL1
82	RGC	HRGC10	OPN4	CPA6
83	RGC	HRGC10	OPN4	CPNE8
84	RGC	HRGC10	OPN4	DMD
85	RGC	HRGC10	OPN4	KIAA1217
86	RGC	HRGC10	OPN4	KIRREL3
87	RGC	HRGC10	OPN4	NDST4
88	RGC	HRGC10	OPN4	OPRM1
89	RGC	HRGC10	OPN4	PLPPR5
90	RGC	HRGC10	OPN4	RASGRP1
91	RGC	HRGC10	OPN4	TGFA
92	RGC	HRGC11	HRGC11	AFF2
93	RGC	HRGC11	HRGC11	AL109930.1
94	RGC	HRGC11	HRGC11	AL589740.1
95	RGC	HRGC11	HRGC11	COL25A1
96	RGC	HRGC11	HRGC11	FOXP2
97	RGC	HRGC11	HRGC11	NOS1AP
98	RGC	HRGC11	HRGC11	NRP1
99	RGC	HRGC11	HRGC11	PPFIBP1
100	RGC	HRGC11	HRGC11	PTPRR
101	RGC	HRGC11	HRGC11	RPH3A
102	RGC	HRGC11	HRGC11	SATB2
103	RGC	HRGC11	HRGC11	TSHZ2
104	RGC	HRGC12	HRGC12	GABRG3
105	RGC	HRGC12	HRGC12	GABRG3-AS1
106	RGC	HRGC12	HRGC12	GRM7
107	RGC	HRGC12	HRGC12	KCNH5
108	RGC	HRGC13	HRGC13	MIR1-1HG
109	RGC	HRGC13	HRGC13	MYO18A
110	RGC	HRGC13	HRGC13	SRRM1
111	RGC	HRGC14	HRGC14	C8orf34
112	RGC	HRGC14	HRGC14	PLCL1
113	RGC	HRGC14	HRGC14	USH2A
114	RGC	HRGC14	HRGC14	WWC1
115	RGC	HRGC15	HRGC15	AC007563.2
116	RGC	HRGC15	HRGC15	ADRA1A
117	RGC	HRGC15	HRGC15	ARPP21
118	RGC	HRGC15	HRGC15	CDH8
119	RGC	HRGC15	HRGC15	GSE1
120	RGC	HRGC15	HRGC15	PDXK
121	RGC	HRGC15	HRGC15	SORCS2
122	RGC	HRGC15	HRGC15	ZNF385B
