# Supplementary material for: Integrated multi-omics single cell atlas of the human retina
Source: Research Square preprint supplement (doi:10.21203/rs.3.rs-3471275/v1), 2023-11-16
Supplement: Supplementary file 8 [file 58be583052f3fb40f41f3975.xlsx]

## Sheet: BC
Table S9. Annotaton of BC, AC, and RGC cell types using cross-mapping
1. Label transferring for human clusters from mouse and macaque
no.	cluster	freq	BC_macaque_name	BC_fullname	BC_marker	BC_group1	BC_group2	BC_SATURN_mouse	BC_SATURN_macaque
1	HBC1	88418	FMB	flat midget biploar	SCG2	Cone_BC	OFF	mouse_BC1A	macaque_FMB
2	HBC2	61384	RB	rod bipolar	PRKCA	Rod_BC	Rod	mouse_RBC	macaque_RB
3	HBC3	46716	IMB	Invaginating midget bipolar	SLC35F4	Cone_BC	ON	mouse_BC7	macaque_IMB
4	HBC4	45356	DB2	diffuse bipolar 2	COL5A1	Cone_BC	OFF	mouse_BC4	macaque_DB2
5	HBC5	37701	DB5	diffuse bipolar 5	MYO16	Cone_BC	ON	mouse_BC5C	macaque_DB5
6	HBC6	33754	DB1	diffuse bipolar 1	EBF1	Cone_BC	OFF	mouse_BC2	macaque_DB1
7	HBC7	26778	DB4a	diffuse bipolar 4a	TTR	Cone_BC	ON	mouse_BC5A	macaque_DB4
8	HBC8	24074	DB3b	diffuse bipolar 3b	MEIS2	Cone_BC	OFF	mouse_BC3B	macaque_DB3b
9	HBC9	17026	GB	giant bipolar	AGBL1	Cone_BC	ON	mouse_BC8	macaque_BB/GB
10	HBC10	14221	DB6	diffuse bipolar 6	LRRC4C	Cone_BC	ON	mouse_BC6	macaque_DB6
11	HBC11	13296	OFFx	OFFx	FEZF1	Cone_BC	OFF	mouse_BC1B	macaque_OFFx
12	HBC12	9458	DB3a	diffuse bipolar 3a	DPP6	Cone_BC	OFF	mouse_BC3A	macaque_DB3a
13	HBC13	2351	DB4b	diffuse bipolar 4b	PRSS12	Cone_BC	ON	mouse_BC5D	macaque_DB4
14	HBC14	2009	BB	blue bipolar	SORCS3	Cone_BC	ON	mouse_BC9	macaque_BB/GB
	total	422542
Note:
A. Description of table columns
	Column1	no.	ID
	Column2	cluster	Cluster ID
	Column3	freq	The number of cells per cluster
	Column4	BC_macaque_name	The name of cell types. The naming is from macaque BC cell types.
	Column5	BC_fullname	The full name of cell types.
	Column6	BC_marker	The marker used per cell cluster/type.
	Column7	BC_group1	The first group for Rod bipolor (Rod_BC) or Cone bipolar (Cone_BC).
	Column8	BC_group2	The second group to split Cone_BC into Cone ON BC (ON) or Cone OFF BC (OFF)
	Column9	BC_SATURN_mouse	The corresponding mouse cell type by SATURN cross-species analysis
	Column10	BC_SATURN_macaque	The corresponding macaque cell type by SATURN cross-species analysis

## Sheet: BC_toprankedgene
group	names	logfoldchanges	pvals	pvals_adj	scores
HBC1	KIAA1217	4.2954	0	0	411.696
HBC1	SLC4A7	3.65718	0	0	399.71
HBC1	PTPRO	4.05219	0	0	399.312
HBC1	DMD	3.39274	0	0	372.142
HBC1	FRMD5	3.42261	0	0	363.159
HBC1	GRIK2	4.64868	0	0	351.736
HBC1	TENM3	2.97757	0	0	350.676
HBC1	DGKB	2.28168	0	0	339.355
HBC1	GRM7	2.00253	0	0	335.881
HBC1	NCKAP5	2.17064	0	0	325.802
HBC1	CACNA1A	2.8595	0	0	316.863
HBC1	SLC1A2	2.32773	0	0	314.022
HBC1	NRXN3	0.747315	0	0	312.946
HBC1	NKAIN3	4.17767	0	0	309.499
HBC1	NEBL	1.77273	0	0	301.509
HBC1	UNC5D	2.26896	0	0	298.395
HBC1	KCNQ3	3.18107	0	0	297.63
HBC1	DLGAP1	2.5837	0	0	295.074
HBC1	PRKCB	1.90087	0	0	294.673
HBC1	TTN	2.8414	0	0	292.222
HBC2	SDK1	5.52577	0	0	391.671
HBC2	PRKCA	5.65556	0	0	390.364
HBC2	CDH12	5.65269	0	0	387.56
HBC2	AL033504.1	5.38561	0	0	386.398
HBC2	SAMD5	5.33425	0	0	385.991
HBC2	RGS7	3.6026	0	0	384.812
HBC2	LRRTM4	3.94086	0	0	370.756
HBC2	PTPRM	3.88814	0	0	369.05
HBC2	DGKI	2.49579	0	0	360.727
HBC2	SASH1	4.68662	0	0	355.109
HBC2	PRKCA-AS1	5.13782	0	0	346.129
HBC2	MTUS2	2.21421	0	0	345.755
HBC2	PLCD4	3.13684	0	0	342.67
HBC2	ST6GALNAC5	3.44495	0	0	341.392
HBC2	KALRN	3.78693	0	0	341.323
HBC2	KIF21A	2.52755	0	0	338.842
HBC2	KCNH5	3.3099	0	0	338.263
HBC2	C16orf74	4.25806	0	0	337.814
HBC2	CDHR3	8.10244	0	0	335.694
HBC2	DAB1	2.76378	0	0	335.022
HBC3	DLG2	2.66437	0	0	332.462
HBC3	SLC35F4	5.20383	0	0	317.031
HBC3	GABRR2	2.85411	0	0	308.518
HBC3	HS3ST4	4.16768	0	0	299.652
HBC3	CARMIL1	3.24916	0	0	296.055
HBC3	SOX5	4.26046	0	0	290.491
HBC3	FRMD3	2.4584	0	0	285.532
HBC3	PTPRT	3.14398	0	0	282.676
HBC3	RALGAPA2	2.58122	0	0	277.182
HBC3	RELN	5.66427	0	0	274.618
HBC3	AP001825.1	2.43587	0	0	274.574
HBC3	VSX1	2.59789	0	0	260.02
HBC3	NCKAP5	2.15161	0	0	259.795
HBC3	ZNF804B	2.76063	0	0	255.659
HBC3	PRKG1	5.22824	0	0	253.704
HBC3	COL4A3	2.75111	0	0	252.453
HBC3	TRPM1	2.47113	0	0	248.543
HBC3	KCNH7	3.1283	0	0	247.243
HBC3	ADGRB3	1.89478	0	0	244.066
HBC3	TMTC2	2.04836	0	0	242.614
HBC4	DSCAM	5.98663	0	0	330.81
HBC4	DPP10	4.8167	0	0	317.539
HBC4	KCNIP4	3.10612	0	0	317.297
HBC4	SLC24A3	3.88107	0	0	299.846
HBC4	GRIK1	3.64852	0	0	293.511
HBC4	NRG1	3.20079	0	0	287.892
HBC4	ZPBP	2.50493	0	0	286.779
HBC4	CNTN4	3.07358	0	0	281.711
HBC4	ANKS1B	2.76759	0	0	275.321
HBC4	NFIB	3.09745	0	0	271.546
HBC4	CNTNAP2	3.24793	0	0	263.302
HBC4	AC112178.1	4.8533	0	0	257.904
HBC4	NUP93	2.8191	0	0	255.724
HBC4	TENM3	2.64336	0	0	249.249
HBC4	PDE4B	2.24876	0	0	242.138
HBC4	DISC1	2.97387	0	0	241.587
HBC4	AC110296.1	2.47507	0	0	232.917
HBC4	RIMS1	1.73143	0	0	232.788
HBC4	NFIA	2.678	0	0	229.133
HBC4	PDE1A	2.55013	0	0	227.559
HBC5	ADARB2	5.41766	0	0	297.086
HBC5	COL19A1	6.5523	0	0	285.645
HBC5	ST6GALNAC3	4.0472	0	0	274.649
HBC5	CACNA2D1	2.39239	0	0	267.804
HBC5	OLFM3	3.87782	0	0	263.784
HBC5	CCSER1	2.24973	0	0	262.387
HBC5	KCTD16	4.03549	0	0	260.542
HBC5	PLXDC2	2.44758	0	0	257.782
HBC5	DOK5	6.13998	0	0	254.996
HBC5	HS3ST5	5.7509	0	0	254.784
HBC5	CSMD3	3.34706	0	0	254.413
HBC5	ASIC2	3.06547	0	0	244.66
HBC5	PTPRG	2.27996	0	0	239.937
HBC5	KCNB2	3.81984	0	0	238.313
HBC5	PRELID2	3.0315	0	0	229.719
HBC5	SLCO3A1	3.19733	0	0	228.427
HBC5	PCDH7	3.93108	0	0	227.678
HBC5	TRPM3	3.48674	0	0	223.713
HBC5	PCDH15	2.87813	0	0	218.611
HBC5	LINC01322	3.33287	0	0	217.058
HBC6	FAM155A	5.11034	0	0	301.95
HBC6	GRID2	3.30949	0	0	282.554
HBC6	LAMA3	7.20768	0	0	278.767
HBC6	KAZN	4.515	0	0	272.947
HBC6	PCDH9	2.73805	0	0	272.849
HBC6	NTNG1	3.97676	0	0	268.791
HBC6	NXPH2	6.6439	0	0	264.096
HBC6	LRP1B	3.3449	0	0	264.04
HBC6	SLIT2	4.19205	0	0	263.791
HBC6	OXR1	2.6096	0	0	261.552
HBC6	ZMAT4	5.18097	0	0	254.979
HBC6	GALNT13	3.20573	0	0	250.621
HBC6	NETO1	1.97865	0	0	250.007
HBC6	EBF1	8.44547	0	0	248.952
HBC6	CDH8	3.71244	0	0	229.557
HBC6	LINC01091	4.35117	0	0	223.892
HBC6	ZFHX4	2.97035	0	0	222.071
HBC6	TENM2	2.75275	0	0	219.1
HBC6	NXPH1	5.08823	0	0	213.862
HBC6	MDGA2	1.32076	0	0	212.333
HBC7	KIRREL3	6.69658	0	0	267.679
HBC7	KCNH7	4.90762	0	0	253.802
HBC7	ADGRL2	2.66903	0	0	241.68
HBC7	NFIA	3.67267	0	0	227.243
HBC7	LINC00470	3.51024	0	0	226.069
HBC7	MEG3	3.10192	0	0	222.728
HBC7	LINC01915	8.04955	0	0	221.254
HBC7	SNTG1	2.67631	0	0	218.855
HBC7	SOX6	3.55875	0	0	213.875
HBC7	ROBO2	2.81585	0	0	213.239
HBC7	NFIA-AS2	3.77839	0	0	211.004
HBC7	CNTNAP2	3.31475	0	0	210.769
HBC7	ZNF804B	2.86388	0	0	206.284
HBC7	INPP4B	2.87048	0	0	203.588
HBC7	ADARB2	3.58073	0	0	200.658
HBC7	KCNB2	3.55495	0	0	198.66
HBC7	AL358335.2	2.64725	0	0	195.476
HBC7	SCN1A	2.98666	0	0	195.052
HBC7	CACNA1G	2.67046	0	0	194.319
HBC7	LMO4	2.84327	0	0	194.136
HBC8	MEIS2	5.54361	0	0	244.844
HBC8	NFIA	4.22818	0	0	239.384
HBC8	PDE4B	2.9821	0	0	233.394
HBC8	CNTNAP2	3.96562	0	0	232.703
HBC8	KCNIP4	3.01961	0	0	230.339
HBC8	DPP10	4.3938	0	0	228.744
HBC8	DISC1	3.85409	0	0	228.284
HBC8	KIRREL3	5.0736	0	0	226.225
HBC8	ABCA4	4.88274	0	0	221.884
HBC8	CTNND2	2.54194	0	0	220.418
HBC8	HCN1	3.58896	0	0	220.173
HBC8	NFIA-AS2	4.08001	0	0	216.632
HBC8	DSCAM	4.69554	0	0	215.61
HBC8	SOX6	3.52487	0	0	208.201
HBC8	GRIK1	3.31356	0	0	197.363
HBC8	CABP5	2.55922	0	0	197.062
HBC8	CNTN4	2.82187	0	0	195.718
HBC8	ZPBP	2.15931	0	0	188.213
HBC8	ABCB1	4.17992	0	0	187.054
HBC8	AC112493.1	4.40884	0	0	184.523
HBC9	MAP3K5	4.50951	0	0	206.555
HBC9	HS3ST4	4.51505	0	0	202.271
HBC9	GPC6	3.24279	0	0	188.115
HBC9	TMTC2	2.71409	0	0	187.096
HBC9	ADARB2	4.47658	0	0	185.283
HBC9	UTRN	8.194	0	0	179.734
HBC9	CSMD1	2.65912	0	0	178.24
HBC9	PCDH11X	6.78283	0	0	171.907
HBC9	KIAA1217	2.96155	0	0	160.654
HBC9	CDH12	3.46154	0	0	159.377
HBC9	OTX2-AS1	1.73455	0	0	153.382
HBC9	TRPM1	2.31766	0	0	149.358
HBC9	MCC	1.73788	0	0	149.083
HBC9	EIF2AK3	3.43713	0	0	147.289
HBC9	SOX5	3.17254	0	0	147.247
HBC9	SYN2	2.47965	0	0	145.608
HBC9	NTRK3	2.92739	0	0	140.377
HBC9	AGBL1	5.41231	0	0	139.071
HBC9	CARMIL1	2.25881	0	0	137.693
HBC9	DNER	2.86956	0	0	136.215
HBC10	ROBO1	5.49714	0	0	200.172
HBC10	RASGEF1B	3.7451	0	0	178.253
HBC10	SPOCK3	3.58334	0	0	177.906
HBC10	AC012409.2	9.88846	0	0	154.828
HBC10	ROBO2	2.73702	0	0	153.993
HBC10	LRRC4C	6.63195	0	0	153.801
HBC10	SLIT2	3.18062	0	0	151.359
HBC10	PTPRM	2.84076	0	0	150.704
HBC10	NTNG1	3.09386	0	0	148.518
HBC10	CDH8	3.29728	0	0	148.225
HBC10	RALYL	4.18936	0	0	146.708
HBC10	CTNNA2	2.09342	0	0	146.491
HBC10	B4GALT6	2.36114	0	0	142.497
HBC10	LIMS1	2.45933	0	0	135.693
HBC10	GRID2	2.17829	0	0	134.771
HBC10	TRPM1	2.21315	0	0	128.865
HBC10	PRICKLE1	2.24403	0	0	128.798
HBC10	NR2F2-AS1	9.09932	0	0	128.642
HBC10	MBOAT2	2.77954	0	0	128.126
HBC10	NPAS3	2.29437	0	0	126.47
HBC11	AC004852.2	5.75395	0	0	174.802
HBC11	NXPH1	5.42476	0	0	168.889
HBC11	PDZRN4	3.3658	0	0	163.419
HBC11	GREB1L	3.47787	0	0	162.698
HBC11	NTM	2.87998	0	0	161.104
HBC11	GRID2	2.78818	0	0	158.95
HBC11	FAM155A	3.35039	0	0	153.548
HBC11	SGCD	2.95033	0	0	147.728
HBC11	ERBB4	4.69156	0	0	143.947
HBC11	GALNT13	2.83574	0	0	143.576
HBC11	NAV3	5.30425	0	0	140.311
HBC11	ARHGAP6	5.01367	0	0	139.327
HBC11	NRG1	2.70883	0	0	139.098
HBC11	CNTNAP5	2.40934	0	0	138.032
HBC11	FEZF1-AS1	3.94252	0	0	135.649
HBC11	GRIA4	2.7161	0	0	135.601
HBC11	MDGA2	1.27739	0	0	130.166
HBC11	NTNG1	2.73959	0	0	127.018
HBC11	NEBL	1.6469	0	0	126.486
HBC11	SLC24A3	2.64828	0	0	126.103
HBC12	ERBB4	8.93866	0	0	166.278
HBC12	HCN1	4.34163	0	0	156.196
HBC12	KCNH7	4.83901	0	0	154.468
HBC12	EPHA3	4.01004	0	0	154.037
HBC12	FGF14	3.06033	0	0	150.895
HBC12	ESRRG	3.91291	0	0	147.568
HBC12	DPP6	6.56084	0	0	146.393
HBC12	SEMA3A	4.58077	0	0	145.59
HBC12	ADGRL3	5.89297	0	0	144.701
HBC12	KCNB2	4.31325	0	0	144.39
HBC12	LSAMP	3.08779	0	0	143.154
HBC12	SLIT2	3.96554	0	0	141.829
HBC12	LINC01798	5.55596	0	0	134.166
HBC12	NTM	2.59683	0	0	130.072
HBC12	AC011990.1	9.66869	0	0	129.819
HBC12	CNTNAP5	2.5972	0	0	128.25
HBC12	PCDH7	3.81482	0	0	126.001
HBC12	REPS2	2.38839	0	0	122.01
HBC12	SCN1A	2.91411	0	0	120.671
HBC12	AC092691.1	3.02959	0	0	119.458
HBC13	KCNB2	4.68966	0	0	76.3837
HBC13	PCDH7	5.36628	0	0	76.2789
HBC13	KIRREL3	5.37182	0	0	74.7118
HBC13	NFIA	3.85853	0	0	72.2238
HBC13	ESRRG	3.59978	0	0	68.8351
HBC13	ADARB2	4.17655	0	0	67.5486
HBC13	LAMA2	4.96791	0	0	66.6139
HBC13	PAM	3.98508	0	0	66.3058
HBC13	HCN1	3.2255	0	0	64.8495
HBC13	NFIA-AS2	3.59524	0	0	63.6569
HBC13	EPHA3	2.93346	0	0	62.2367
HBC13	AC004784.1	3.17659	0	0	61.6391
HBC13	KCTD16	3.17059	0	0	60.2538
HBC13	PRELID2	2.95123	0	0	59.685
HBC13	AL358335.2	2.47211	0	0	56.9562
HBC13	POU6F2	3.68588	0	0	55.7238
HBC13	CABP5	2.18634	0	0	54.6048
HBC13	SCN1A	2.55568	0	0	53.6114
HBC13	LMO4	2.46583	0	0	53.5168
HBC13	ADGRL2	1.87868	0	0	52.0103
HBC14	AFF3	4.09162	0	0	75.1074
HBC14	SOX5	4.05643	0	0	66.9632
HBC14	ADARB2	4.59741	0	0	66.7445
HBC14	ANK1	6.15655	0	0	66.7278
HBC14	SORCS3	9.25964	0	0	64.0891
HBC14	ASTN2	3.79915	0	0	60.7101
HBC14	CSMD1	2.47274	0	0	60.2388
HBC14	SLC7A11	3.88102	0	0	58.4156
HBC14	KIF13A	2.339	0	0	57.0805
HBC14	KIAA1217	2.8531	0	0	55.3471
HBC14	PTPN3	4.13074	0	0	53.0877
HBC14	SKOR2	6.00748	0	0	52.921
HBC14	TMEM108	2.7371	0	0	52.83
HBC14	SGCD	2.49227	0	0	51.8704
HBC14	TRPM1	2.23795	0	0	50.8781
HBC14	SGK1	3.51231	0	0	50.5927
HBC14	PCDH11X	4.27755	0	0	48.2195
HBC14	SYN2	2.22212	0	0	47.4263
HBC14	COL4A2	4.07275	0	0	47.093
HBC14	LEMD1	3.08579	0	0	45.4295

## Sheet: BC_note
1. Label transferring for human clusters from mouse and macaque
no.	clusterID	freq	Macaque_naming	Full name	Used marker	group1	group2	SATURN (mouse, 3way)	SATURN (macaque, 3way)	SATURN (mouse, 2way)	SATURN (macaque, 2way)
1	HBC1	88418	FMB	flat midget biploar	SCG2	Cone_BC	OFF	mouse_BC1A	macaque_FMB	mouse_BC1A	macaque_FMB
2	HBC2	61384	RB	rod bipolar	PRKCA	Rod_BC	Rod	mouse_RBC	macaque_RB	mouse_RBC	macaque_RB
3	HBC3	46716	IMB	Invaginating midget bipolar	SLC35F4	Cone_BC	ON	mouse_BC7	macaque_IMB	mouse_BC7	macaque_IMB
4	HBC4	45356	DB2	diffuse bipolar 2	COL5A1	Cone_BC	OFF	mouse_BC4	macaque_DB2	mouse_BC4	macaque_DB2
5	HBC5	37701	DB5	diffuse bipolar 5	MYO16	Cone_BC	ON	mouse_BC5C	macaque_DB5*	mouse_BC5C	macaque_DB5*
6	HBC6	33754	DB1	diffuse bipolar 1	EBF1	Cone_BC	OFF	mouse_BC2	macaque_DB1	mouse_BC2	macaque_DB1
7	HBC7	26778	DB4a	diffuse bipolar 4a	TTR	Cone_BC	ON	mouse_BC5A	Unassigned	mouse_BC5A	macaque_DB4
8	HBC8	24074	DB3b	diffuse bipolar 3b	MEIS2	Cone_BC	OFF	mouse_BC3B	macaque_DB3b	mouse_BC3B	macaque_DB3b
9	HBC9	17026	GB	giant bipolar	PCDH11X	Cone_BC	ON	mouse_BC8	macaque_BB/GB*	mouse_BC9	macaque_BB/GB*
10	HBC10	14221	DB6	diffuse bipolar 6	LRRC4C	Cone_BC	ON	mouse_BC6	macaque_DB6	mouse_BC8	macaque_DB6
11	HBC11	13296	OFFx		FEZF1	Cone_BC	OFF	mouse_BC1B	macaque_OFFx	mouse_BC1B	macaque_OFFx
12	HBC12	9458	DB3a	diffuse bipolar 3a	DPP6	Cone_BC	OFF	mouse_BC3A	macaque_DB3a	mouse_BC3A	macaque_DB3a
13	HBC13	2351	DB4b	diffuse bipolar 4b	PRSS12	Cone_BC	ON	mouse_BC5D	Unassigned	mouse_BC5D	macaque_DB4
14	HBC14	2009	BB	blue bipolar	PCDH11X	Cone_BC	ON	mouse_BC9	macaque_BB/GB*	mouse_BC1A	macaque_BB/GB*
	total	422542
2. Verification of mapping between macaque and mouse
2.1 Cell type mapping from macaque to mouse
no.	mouse					group1	group2	SATURN (macaque, 3way)	SATURN (macaque, 2way)
1	BC1A					Cone_BC	OFF	macaque_FMB	macaque_FMB
2	BC1B					Cone_BC	OFF	macaque_OFFx	macaque_OFFx
3	BC2					Cone_BC	OFF	macaque_DB1	macaque_DB1
4	BC3A					Cone_BC	OFF	macaque_DB3a	macaque_DB3a
5	BC3B					Cone_BC	OFF	macaque_DB3b	macaque_DB2
6	BC4					Cone_BC	OFF	macaque_DB2	macaque_OFFx
7	BC5A					Cone_BC	ON	Unassigned	macaque_DB4
8	BC5B					Cone_BC	ON	macaque_DB4	macaque_DB5*
9	BC5C					Cone_BC	ON	macaque_DB5*	macaque_DB5*
10	BC5D					Cone_BC	ON	Unassigned	macaque_DB3b
11	BC6					Cone_BC	ON	macaque_DB6	macaque_DB6
12	BC7					Cone_BC	ON	macaque_IMB	macaque_IMB
13	BC8					Cone_BC	ON	macaque_BB/GB*	Unassigned
14	BC9					Cone_BC	ON	macaque_BB/GB*	macaque_BB/GB*
15	RBC					Rod_BC	Rod	macaque_RB	macaque_RB
2.2 Cell type mapping from mouse to macaque
no.	macaque					group1	group2	SATURN (mouse, 3 way)	SATURN (mouse, 2 way)
1	BB/GB*					Cone_BC	ON	mouse_BC9	mouse_BC9
2	DB1					Cone_BC	OFF	mouse_BC2	mouse_BC2
3	DB2					Cone_BC	OFF	mouse_BC4	mouse_BC3B
4	DB3a					Cone_BC	OFF	mouse_BC3A	mouse_BC3A
5	DB3b					Cone_BC	OFF	mouse_BC3B	mouse_BC5D
6	DB4					Cone_BC	ON	mouse_BC5B	mouse_BC5A
7	DB5*					Cone_BC	ON	mouse_BC5C	mouse_BC5C
8	DB6					Cone_BC	ON	mouse_BC6	mouse_BC6
9	FMB					Cone_BC	OFF	mouse_BC1A	mouse_BC1A
10	IMB					Cone_BC	ON	mouse_BC7	mouse_BC7
11	OFFx					Cone_BC	OFF	mouse_BC1B	mouse_BC1B
12	RB					Rod_BC	Rod	mouse_RBC	mouse_RBC
3. Note
3.1 Cross-species analysis
a. 3-way cross-species analysis: Run SATURN on 3 species, i.e., human+mouse+macaque.
b. 2-way cross-species analysis: Run SATURN on two species, i.e., human+mouse, human+macaque, and macaque+mouse, respectively.
3.2 Macaque naming of biplor cell types
no	celltype		category	name	mouse(Ref)
1	FMB	OFF midget	OFF bipolar	flat midget biploar	BC1
2	DB1		OFF bipolar	diffuse bipolar 1	BC2
3	DB2		OFF bipolar	diffuse bipolar 2	BC4
4	DB3a		OFF bipolar	diffuse bipolar 3a	BC3A
5	DB3b		OFF bipolar	diffuse bipolar 3b
6	OFFx		OFF bipolar
7	IMB	ON midget	ON bipolar	Invaginating midget bipolar	BC7
8	DB4	DB4a + DB4b	ON bipolar	diffuse bipolar 4	BC5A
9	DB5		ON bipolar	diffuse bipolar 5
10	DB6		ON bipolar	diffuse bipolar 6	BC6
11	GB		ON bipolar	giant bipolar
12	BB		ON bipolar	blue bipolar
13	RB		Rod bipolar	rod bipolar	RBC
Ref:
1. https://doi.org/10.1016/j.preteyeres.2020.100844
2. https://doi.org/10.1016/j.cell.2019.01.004

## Sheet: AC
1. Label transferring for human clusters from mouse and macaque
no.	cluster	freq	AC_group1	AC_name_bymarker	AC_fullname_bymarker	AC_marker	AC_note_bymarker	AC_celltype_Sanes25	AC_mapping_Sanes25	AC_celltype_macaque34	AC_mapping_macaque34	AC_celltype_mouse63	AC_mapping_mouse63
1	HAC1	36104	Both					Gly7	100.0%Gly7	Gl7	99.4%Gl7	AC33	99.7%AC33
2	HAC2	34655	Glycinergic	AII	A2 amacrine cell 1	GJD2	AII	Gly2	100.0%Gly2	Gl8	99.7%Gl8	AC3	100.0%AC3
3	HAC3	29428	GABAergic					Gaba1	95.7%Gaba1		87.5%Unassigned+12.4%Gl4	AC6	99.9%AC6
4	HAC4	27247	GABAergic					Gaba8	100.0%Gaba8	Ga9	91.2%Ga9	AC23	99.4%AC23
5	HAC5	26167	GABAergic					Gaba7	100.0%Gaba7	Ga11	93.8%Ga11	AC2	90.1%AC2
6	HAC6	18452	Glycinergic	VG3	Vesicular Glutamate 3	SLC17A8		Gly4	100.0%Gly4		98.9%Unassigned	AC13	99.9%AC13
7	HAC7	18363	GABAergic					Gaba9	100.0%Gaba9	Ga9	98.9%Ga9	AC26	98.9%AC26
8	HAC8	17074	GABAergic					Gaba4	99.9%Gaba4		89.8%Unassigned+10.2%Ga11	AC2	97.9%AC2
9	HAC9	13741	GABAergic					Gaba1	99.4%Gaba1	Ga1	99.1%Ga1	AC8	99.9%AC8
10	HAC10	12198	GABAergic	ON-SAC	ON starburst amacrine cell	MEGF10		Gaba5	99.6%Gaba5		69.3%Ga23+30.6%Unassigned	AC17	99.9%AC17
11	HAC11	11096	GABAergic					Gaba7	99.8%Gaba7	Ga21	99.5%Ga21	AC14	99.8%AC14
12	HAC12	8458	Glycinergic					Gly3	100.0%Gly3	Gl2	99.9%Gl2	AC55	99.9%AC55
13	HAC13	7831	GABAergic						85.2%Gaba14+14.0%Unassigned	Ga22	99.2%Ga22	AC25	99.1%AC25
14	HAC14	7519	Glycinergic					Gly1	100.0%Gly1	Gl1	98.2%Gl1	AC10	99.5%AC10
15	HAC15	7393	Both					Gly7	100.0%Gly7		81.2%Unassigned+18.6%Gl6	AC19	100.0%AC19
16	HAC16	6936	GABAergic						88.1%Gaba7+10.2%Unassigned		92.8%Unassigned	AC1	99.6%AC1
17	HAC17	5618	Glycinergic	SEG	Satb2+Ebf3+GlyT1+ amacrine cell	PROM1		Gly6	100.0%Gly6	Gl3	99.8%Gl3	AC4	99.9%AC4
18	HAC18	5481	Glycinergic					Gly8	99.9%Gly8	Gl4	100.0%Gl4	AC12	99.9%AC12
19	HAC19	4864	GABAergic						41.6%Unassigned+29.5%Gaba4+28.7%Gaba10	Ga10	97.7%Ga10	AC21	97.9%AC21
20	HAC20	4326	GABAergic					Gaba11	99.9%Gaba11	Ga5	100.0%Ga5	AC46	99.8%AC46
21	HAC21	4122	GABAergic					Gaba3	100.0%Gaba3		80.0%Ga17+20.0%Unassigned	AC11	100.0%AC11
22	HAC22	4110	GABAergic						50.7%Unassigned+38.7%Gaba10+10.6%Gaba12	Ga8	99.3%Ga8		49.8%Unassigned+48.9%AC50
23	HAC23	4076	GABAergic					Gaba12	95.3%Gaba12		91.2%Unassigned		76.0%AC42+23.8%Unassigned
24	HAC24	3927	GABAergic					Gaba2	100.0%Gaba2		100.0%Unassigned	AC5	100.0%AC5
25	HAC25	3900	GABAergic						63.6%Unassigned+20.2%Gaba11+14.2%Gaba10	Ga12	99.4%Ga12		82.3%Unassigned+14.7%AC21
26	HAC26	3236	GABAergic	OFF-SAC	OFF starburst amacrine cell 1	TENM3	OFF-SAC	Gaba5	100.0%Gaba5		84.2%Ga23+13.6%Unassigned		91.4%Unassigned
27	HAC27	3168	GABAergic	PENK	Penk+ amacrine cell	PENK		Gaba4	98.8%Gaba4	Ga16	99.6%Ga16	AC7	100.0%AC7
28	HAC28	3168	GABAergic	VIP	Vip+ amacrine cell	VIP		Gaba16	92.5%Gaba16	Ga4	99.9%Ga4	AC22	100.0%AC22
29	HAC29	3143	GABAergic						78.1%Gaba11+21.8%Unassigned	Ga2	100.0%Ga2	AC49	94.2%AC49
30	HAC30	3036	GABAergic					Gaba6	98.3%Gaba6	Ga15	99.4%Ga15		91.4%Unassigned
31	HAC31	2952	Glycinergic					Gly4	96.7%Gly4		55.2%Unassigned+44.6%Gl6	AC9	100.0%AC9
32	HAC32	2942	GABAergic					Gaba4	97.9%Gaba4	Ga6	99.7%Ga6	AC39	99.5%AC39
33	HAC33	2924	Glycinergic					Gly5	100.0%Gly5		99.9%Unassigned	AC30	100.0%AC30
34	HAC34	2896	GABAergic						78.8%Gaba10+14.7%Unassigned	Ga8	99.7%Ga8	AC50	99.4%AC50
35	HAC35	2641	GABAergic						53.8%Unassigned+41.9%Gaba14	Ga19	99.5%Ga19	AC31	99.7%AC31
36	HAC36	2408	GABAergic					Gaba10	92.3%Gaba10		92.8%Unassigned	AC47	96.7%AC47
37	HAC37	2219	GABAergic						63.9%Unassigned+19.1%Gaba10+16.9%Gaba4	Ga14	98.6%Ga14	AC48	99.9%AC48
38	HAC38	2096	GABAergic					Gaba12	100.0%Gaba12	Ga24	98.2%Ga24	AC20	99.9%AC20
39	HAC39	1867	GABAergic	nNOS_1	Nos+ amacrine cell 1	NOS1	nNOS	Gaba13	99.8%Gaba13	Gl5	92.9%Gl5	AC37	99.7%AC37
40	HAC40	1739	GABAergic					Gaba4	98.7%Gaba4	Ga13	99.0%Ga13	AC32	99.5%AC32
41	HAC41	1717	Glycinergic					Gly5	99.8%Gly5		50.9%Unassigned+48.2%Ga23	AC24	99.9%AC24
42	HAC42	1692	GABAergic						72.1%Gaba17+27.2%Unassigned	Ga25	99.4%Ga25	AC45	99.5%AC45
43	HAC43	1506	GABAergic					Gaba6	99.7%Gaba6	Ga20	98.9%Ga20	AC38	99.3%AC38
44	HAC44	1453	GABAergic					Gaba13	100.0%Gaba13	Ga7	99.9%Ga7	AC40	97.5%AC40
45	HAC45	1442	GABAergic	CAII	Catecholaminergic amacrine cell 2	TH		Gaba15	99.9%Gaba15	Ga26	90.9%Ga26	AC54	90.9%AC54
46	HAC46	1380	GABAergic	nNOS_2	Nos+ amacrine cell 2	NOS1	nNOS		62.4%Unassigned+35.7%Gaba14		46.0%Unassigned+40.6%Gl8+13.1%Ga19	AC18	99.2%AC18
47	HAC47	1183	GABAergic						87.5%Gaba13+12.1%Unassigned	Ga21	99.9%Ga21	AC27	99.9%AC27
48	HAC48	1160	GABAergic						58.8%Unassigned+37.6%Gaba13		80.6%Gl8+17.2%Unassigned	AC36	99.2%AC36
49	HAC49	1109	GABAergic					Gaba1	97.6%Gaba1		48.4%Gl6+45.3%Unassigned	AC28	99.4%AC28
50	HAC50	1012	Both					Gly1	98.2%Gly1	Gl5	99.0%Gl5	AC15	98.7%AC15
51	HAC51	899	GABAergic					Gaba6	92.7%Gaba6	Ga3	99.6%Ga3	AC29	99.6%AC29
52	HAC52	894	GABAergic						80.4%Gaba4+16.4%Unassigned	Ga13	99.8%Ga13	AC32	91.6%AC32
53	HAC53	697	GABAergic						70.4%Gaba1+28.8%Unassigned		94.3%Unassigned	AC43	91.2%AC43
54	HAC54	670	Both						83.7%Gly4+15.2%Unassigned		53.0%Unassigned+28.5%Gl4+18.4%Gl6		93.3%Unassigned
55	HAC55	662	GABAergic						49.5%Unassigned+43.7%Gaba3		53.9%Ga25+41.7%Unassigned	AC41	96.2%AC41
56	HAC56	569	GABAergic						57.1%Unassigned+27.9%Gaba8+10.5%Gaba2	Ga9	92.1%Ga9		88.8%Unassigned
57	HAC57	513	GABAergic					Gaba1	98.6%Gaba1		66.3%Gl6+32.7%Unassigned		86.4%AC28+12.5%Unassigned
58	HAC58	470	GABAergic						75.7%Gaba1+24.3%Unassigned		92.3%Unassigned		74.7%AC53+22.8%Unassigned
59	HAC59	458	Glycinergic						65.3%Unassigned+32.5%Gly1	Gl6	94.5%Gl6	AC35	96.1%AC35
60	HAC60	453	GABAergic	nNOS_3	Nos+ amacrine cell 3	NOS1	nNOS		66.0%Gaba13+33.1%Unassigned	Ga18	94.7%Ga18	AC52	96.5%AC52
61	HAC61	429	Both						63.6%Unassigned+31.7%Gly2		89.3%Ga17+10.3%Unassigned		73.9%Unassigned+23.3%AC60
62	HAC62	414	Glycinergic	AII*	A2 amacrine cell 2	GJD2	AII	Gly2	95.4%Gly2		66.2%Unassigned+31.6%Gl5	AC16	97.3%AC16
63	HAC63	391	Both						80.8%Gaba10+17.6%Unassigned		88.0%Unassigned	AC51	100.0%AC51
64	HAC64	374	GABAergic						69.3%Unassigned+27.3%Gaba17		80.2%Unassigned+17.6%Ga2	AC49	97.6%AC49
65	HAC65	352	GABAergic						63.1%Gaba7+23.6%Unassigned+11.6%Gaba4		65.6%Unassigned+22.2%Ga11		70.7%Unassigned+28.4%AC16
66	HAC66	291	GABAergic						66.3%Gaba3+33.7%Unassigned		59.5%Ga25+40.5%Unassigned	AC56	92.8%AC56
67	HAC68	218	GABAergic					Gaba1	92.2%Gaba1		78.0%Unassigned+12.8%Gl6		50.5%Unassigned+42.7%AC45
68	HAC69	195	GABAergic						75.4%Gaba1+20.5%Unassigned		52.8%Gl6+30.3%Unassigned+12.8%Ga13		69.2%Unassigned+21.0%AC28
69	HAC70	195	GABAergic						79.5%Unassigned+10.3%Gaba2		79.0%Unassigned+13.8%Ga16		71.8%AC51+28.2%Unassigned
70	HAC71	161	GABAergic	OFF-SAC*	OFF starburst amacrine cell 2	TENM3	OFF-SAC	Gaba5	94.4%Gaba5		72.7%Ga23+26.1%Unassigned		95.0%Unassigned
71	HAC72	141	GABAergic	CAI	Catecholaminergic amacrine cell 1	TH, CHL1			51.1%Unassigned+48.9%Gaba15		95.7%Unassigned		51.1%AC57+48.9%Unassigned
72	HAC73	141	GABAergic						56.0%Gaba7+44.0%Unassigned		68.1%Unassigned+22.7%Ga21		73.8%Unassigned+25.5%AC14
73	HAC74	34	Both						76.5%Unassigned+20.6%Gly5		58.8%Unassigned+17.6%Gl6+14.7%Gl4		88.2%Unassigned
	total	387069
Note:
A. Description of table columns
	Column1	no.	ID
	Column2	cluster	Cluster ID
	Column3	freq	The number of cells per cluster
	Column4	AC_group1	The first level grouping of AC clusters, i.e., GABAergic, Glycinergic, Both, or nGnG.
	Column5	AC_name_bymarker	The cell type identified by markers
	Column6	AC_fullname_bymarker	The full name of the cell type
	Column7	AC_marker	The AC markers used to identify the cell type
	Column8	AC_note_bymarker	The note of markers. E.g., HAC67 is RGC-like.
	Column9	AC_celltype_Sanes25	The corresponding public cell type labeling from Sanes dataset by SATURN cross-species analysis
	Column10	AC_mapping_Sanes25	The cell proportions of public labeling predicted using SATURN co-embedding
	Column11	AC_celltype_macaque34	The corresponding macaque cell type by SATURN cross-species analysis
	Column12	AC_mapping_macaque34	The cell proportions of macaque cell types predicted using SATURN co-embedding
	Column13	AC_celltype_mouse63	The corresponding mouse cell type by SATURN cross-species analysis
	Column14	AC_mapping_mouse63	The cell proportions of mouse cell types predicted using SATURN co-embedding

## Sheet: AC_toprankedgene
group	names	logfoldchanges	pvals	pvals_adj	scores
HAC1	TSHZ2	5.41502	0	0	294.441
HAC1	TMEM132D	5.15779	0	0	288.231
HAC1	SYN2	3.59221	0	0	287.776
HAC1	GABRG3	4.04741	0	0	267.65
HAC1	CNTNAP2	2.33051	0	0	265.358
HAC1	NRXN1	1.95792	0	0	256.379
HAC1	NTNG1	4.08696	0	0	251.623
HAC1	TRPM3	2.73325	0	0	249.777
HAC1	CSMD1	3.30764	0	0	248.364
HAC1	AL109930.1	4.74176	0	0	244.877
HAC1	CHRM3	3.49689	0	0	242.42
HAC1	ADARB2	3.67414	0	0	242.142
HAC1	KALRN	2.65643	0	0	239.874
HAC1	KIRREL3	3.01366	0	0	234.089
HAC1	TMEM132C	3.81566	0	0	230.062
HAC1	ZFPM2	2.14063	0	0	219.532
HAC1	KIF13A	2.22392	0	0	217.021
HAC1	NXPH2	4.10941	0	0	215.408
HAC1	PLCB1	2.30574	0	0	214.138
HAC1	GABRG3-AS1	3.63253	0	0	212.741
HAC2	SDK1	4.77717	0	0	298.435
HAC2	AC073050.1	4.6901	0	0	295.814
HAC2	NFIA	5.63298	0	0	295.282
HAC2	SLC12A7	7.87481	0	0	293.968
HAC2	CDHR3	6.25043	0	0	288.717
HAC2	PLCL1	3.96265	0	0	285.642
HAC2	GLCE	4.99095	0	0	283.591
HAC2	SYNDIG1	4.10971	0	0	282.831
HAC2	THSD7B	5.25973	0	0	282.395
HAC2	KCNMA1	2.83021	0	0	282.151
HAC2	NFIA-AS2	5.8302	0	0	279.482
HAC2	TLL1	4.67267	0	0	279.262
HAC2	ST6GALNAC5	3.86862	0	0	278.843
HAC2	DSCAML1	3.60072	0	0	277.219
HAC2	CDH7	3.58238	0	0	274.824
HAC2	HSPA12A	2.9031	0	0	273.181
HAC2	TCERG1L	3.34999	0	0	270.153
HAC2	SLC6A6	3.40023	0	0	268.153
HAC2	PDE8A	3.94195	0	0	267.017
HAC2	VAV3	3.59677	0	0	266.626
HAC3	LRRC4C	5.06044	0	0	272.185
HAC3	FILIP1L	4.10052	0	0	266.225
HAC3	OLFM3	3.47494	0	0	264.372
HAC3	THSD4	4.33477	0	0	255.704
HAC3	CDH20	4.71908	0	0	252.074
HAC3	NEDD4L	2.44292	0	0	246.041
HAC3	RALYL	3.16779	0	0	241.584
HAC3	CMSS1	2.83774	0	0	235.505
HAC3	TJP1	2.22303	0	0	231.214
HAC3	ATRNL1	2.27309	0	0	228.565
HAC3	DSCAM	2.72384	0	0	228.015
HAC3	DCLK1	2.77645	0	0	227.903
HAC3	PDE1C	3.21783	0	0	227.175
HAC3	NAV2	2.64657	0	0	225.418
HAC3	FHOD3	2.40037	0	0	222.735
HAC3	MEIS2	2.94978	0	0	221.942
HAC3	UNC13C	2.52877	0	0	221.839
HAC3	CCDC85A	2.58606	0	0	220.672
HAC3	ESRRG	2.69158	0	0	219.531
HAC3	BRINP1	2.60127	0	0	218.705
HAC4	ROBO1	3.71916	0	0	258.505
HAC4	PTPRM	3.76604	0	0	242.132
HAC4	SPOCK1	3.48294	0	0	241.567
HAC4	PDGFRA	6.74792	0	0	235.076
HAC4	SLC1A2	3.50706	0	0	232.912
HAC4	KLF3-AS1	4.12001	0	0	230.168
HAC4	RYR3	2.70126	0	0	224.996
HAC4	GRID1	3.09974	0	0	215.345
HAC4	DOK5	2.69194	0	0	215.224
HAC4	THSD7A	2.66715	0	0	212.887
HAC4	ASTN2	2.43914	0	0	211.722
HAC4	LNX1	3.50577	0	0	211.142
HAC4	SPHKAP	2.92445	0	0	205.677
HAC4	PCDH9	2.83435	0	0	205.455
HAC4	KLHL5	2.15945	0	0	203.452
HAC4	UNC13C	2.30036	0	0	193.477
HAC4	SOX5	2.55388	0	0	192.804
HAC4	EGFR	4.03979	0	0	188.68
HAC4	THSD4	2.98	0	0	188.355
HAC4	SYN3	2.55218	0	0	185.611
HAC5	PEX5L	4.5587	0	0	249.205
HAC5	INPP4B	3.71638	0	0	244.94
HAC5	ZNF385D	2.9119	0	0	243.058
HAC5	AC105411.1	6.2649	0	0	242.262
HAC5	CUX2	3.41259	0	0	241.419
HAC5	PCDH7	3.74041	0	0	238.783
HAC5	XKR4	2.46303	0	0	228.031
HAC5	KAZN	3.3494	0	0	227.295
HAC5	LINC01170	4.6564	0	0	225.109
HAC5	SNTG1	2.95444	0	0	223.385
HAC5	GREB1L	2.83738	0	0	222.497
HAC5	LINC00871	4.72075	0	0	219.224
HAC5	TENM3	3.19555	0	0	218.331
HAC5	CDH12	3.09154	0	0	215.697
HAC5	CPNE5	3.5456	0	0	213.052
HAC5	PTPRO	2.59312	0	0	211.181
HAC5	TMEM117	2.47388	0	0	210.4
HAC5	PLXDC1	3.57557	0	0	209.238
HAC5	EPHA6	2.52838	0	0	205.952
HAC5	ZMAT4	2.83639	0	0	203.717
HAC6	CACNA2D1	6.01541	0	0	228.028
HAC6	CSMD3	4.84769	0	0	224.885
HAC6	ERBB4	5.76657	0	0	223.786
HAC6	CACNA2D3	4.93816	0	0	223.705
HAC6	PTPRT	5.75591	0	0	222.925
HAC6	NXPH1	8.12969	0	0	221.722
HAC6	BNC2	7.598	0	0	220.185
HAC6	AC109466.1	7.53313	0	0	218.821
HAC6	SGCZ	6.09699	0	0	217.283
HAC6	CDK14	3.46848	0	0	215.556
HAC6	NLGN1	3.73748	0	0	215.156
HAC6	GABRB2	3.94693	0	0	213.102
HAC6	AC008415.1	7.04422	0	0	208.893
HAC6	CA10	4.54207	0	0	208.736
HAC6	PTPRD	2.82282	0	0	207.751
HAC6	LRRC7	4.0747	0	0	205.576
HAC6	GABRA1	5.03411	0	0	204.626
HAC6	SHANK2	2.7233	0	0	203.115
HAC6	RYR2	2.78839	0	0	202.953
HAC6	RGS7	2.7242	0	0	200.223
HAC7	LRP1B	3.74187	0	0	206.11
HAC7	SOX5	3.04082	0	0	195.273
HAC7	GALNT13	2.40618	0	0	186.735
HAC7	CNTN3	3.5465	0	0	184.993
HAC7	CTTNBP2	2.45258	0	0	181.204
HAC7	PTPRM	3.16234	0	0	181.172
HAC7	EYA4	4.08754	0	0	178.091
HAC7	KLHL5	2.2988	0	0	176.708
HAC7	KLHL29	2.76005	0	0	170.809
HAC7	ANTXR1	3.01035	0	0	166.249
HAC7	PLXNA4	3.8412	0	0	165.382
HAC7	DAB1	2.21097	0	0	161.074
HAC7	GLRA3	3.434	0	0	155.189
HAC7	PLXDC2	2.13727	0	0	155.158
HAC7	NFIA	3.12724	0	0	153.987
HAC7	SAMD3	3.12612	0	0	150.561
HAC7	PCDH10	3.72805	0	0	148.693
HAC7	ST6GAL2	2.68413	0	0	146.659
HAC7	CLMP	2.26063	0	0	139.729
HAC7	SPHKAP	2.31673	0	0	139.402
HAC8	PCDH7	3.70779	0	0	192.774
HAC8	LINC01170	4.91675	0	0	192.487
HAC8	SLC4A4	3.87674	0	0	184.803
HAC8	CNTN5	3.43782	0	0	183.134
HAC8	PEX5L	3.76343	0	0	180.193
HAC8	CACNA1E	3.36393	0	0	176.006
HAC8	DACH2	3.31556	0	0	175.971
HAC8	CUX2	2.8744	0	0	173.967
HAC8	FBXL7	2.88778	0	0	168.313
HAC8	GALNT17	2.84897	0	0	168.053
HAC8	KCNJ3	2.59208	0	0	166.572
HAC8	CCDC171	2.50291	0	0	165.472
HAC8	CRIM1	2.77516	0	0	164.211
HAC8	KAZN	2.86371	0	0	162.782
HAC8	INPP4B	2.71716	0	0	161.348
HAC8	PTPRO	2.36401	0	0	158.027
HAC8	PCDH9	2.70223	0	0	157.326
HAC8	DAPK1	2.0615	0	0	154.318
HAC8	PTCHD1-AS	3.44586	0	0	152.423
HAC8	SCN1A	2.86697	0	0	146.826
HAC9	LRRC4C	4.83472	0	0	183.243
HAC9	RNF220	5.19623	0	0	182.4
HAC9	OLFM3	3.39868	0	0	180.009
HAC9	RALYL	3.3134	0	0	176.914
HAC9	AC073114.1	4.64125	0	0	169.607
HAC9	ACTN2	4.40973	0	0	167.071
HAC9	DSCAM	2.71459	0	0	161.318
HAC9	CARTPT	4.18574	0	0	158.426
HAC9	UNC13C	2.56992	0	0	158.362
HAC9	FILIP1L	3.23211	0	0	157.623
HAC9	SEMA6A	2.50046	0	0	152.479
HAC9	SLC44A5	3.15685	0	0	151.065
HAC9	ATRNL1	2.1225	0	0	149.914
HAC9	PRKCA	2.64616	0	0	147.778
HAC9	MEIS2	2.78249	0	0	147.681
HAC9	SOX5	2.62951	0	0	147.57
HAC9	DLGAP1	1.50507	0	0	147.312
HAC9	DCLK1	2.49633	0	0	147.294
HAC9	BRINP1	2.39866	0	0	145.353
HAC9	GABRG1	2.84087	0	0	144.214
HAC10	CCDC39	8.53091	0	0	186.421
HAC10	RBFOX1	4.68491	0	0	183.55
HAC10	KIAA1217	4.62199	0	0	183.387
HAC10	CACNA1B	3.09099	0	0	178.924
HAC10	SLC5A7	6.91799	0	0	177.668
HAC10	DOK5	3.60702	0	0	175.708
HAC10	FAM49B	2.72409	0	0	174.668
HAC10	ADAMTS18	5.43585	0	0	174.244
HAC10	SLC24A4	6.7025	0	0	172.028
HAC10	FLT1	7.31313	0	0	168.784
HAC10	MAML2	4.49736	0	0	166.196
HAC10	SORCS2	3.77301	0	0	165.853
HAC10	SLC35F4	4.80249	0	0	165.184
HAC10	MTUS2	3.04529	0	0	164.181
HAC10	POU6F2	3.36839	0	0	160.022
HAC10	B4GALT6	3.64839	0	0	158.825
HAC10	RBMS3	4.17472	0	0	157.957
HAC10	MED12L	3.19169	0	0	156.758
HAC10	LRP1B	3.42311	0	0	156.258
HAC10	SPOCK3	2.69987	0	0	156.1
HAC11	GREB1L	3.39031	0	0	164.56
HAC11	LMF1	4.25454	0	0	160.535
HAC11	DPP10	4.28851	0	0	157.37
HAC11	NPAS3	3.39054	0	0	154.37
HAC11	UTRN	3.65079	0	0	151.669
HAC11	ZFHX3	3.67161	0	0	150.894
HAC11	CPAMD8	4.38303	0	0	148.594
HAC11	PCDH11X	4.34037	0	0	148.439
HAC11	CDH12	3.1681	0	0	147.448
HAC11	VPS41	2.59498	0	0	145.169
HAC11	TENM3	3.02735	0	0	140.292
HAC11	CPNE8	3.2165	0	0	140.205
HAC11	PDGFD	5.62674	0	0	139.24
HAC11	ZNF385D	2.35604	0	0	138.927
HAC11	AC009041.2	5.20474	0	0	135.826
HAC11	PTPRR	2.49045	0	0	135.095
HAC11	ARHGAP24	3.27052	0	0	134.902
HAC11	ZFHX4	2.99756	0	0	134.776
HAC11	PEX5L	3.26492	0	0	134.679
HAC11	SLC4A4	3.19594	0	0	134.54
HAC12	NFIB	5.636	0	0	145.086
HAC12	ALDH1A2	6.39801	0	0	136.576
HAC12	CDH18	3.02916	0	0	135.187
HAC12	PCDH15	4.14013	0	0	133.978
HAC12	GPC6	4.08234	0	0	131.115
HAC12	TCF4	3.43744	0	0	129.943
HAC12	PREX2	4.1596	0	0	121.438
HAC12	NCKAP5	3.2333	0	0	117.112
HAC12	NRXN1	1.75773	0	0	115.298
HAC12	ZNF423	3.14821	0	0	115.085
HAC12	TSHZ2	3.501	0	0	113.599
HAC12	SEMA3A	2.88405	0	0	112.422
HAC12	TMTC2	2.38753	0	0	112.417
HAC12	NELL1	5.18309	0	0	112.338
HAC12	NOVA1	2.06591	0	0	108.392
HAC12	BRINP3	3.43398	0	0	108.223
HAC12	CACNA2D3	2.72228	0	0	106.092
HAC12	NFIX	5.16176	0	0	105.522
HAC12	FREM1	5.18767	0	0	104.989
HAC12	FAM135B	4.42149	0	0	104.871
HAC13	IL1RAPL2	6.31726	0	0	144.268
HAC13	CDH13	5.06331	0	0	135.284
HAC13	DMD	3.64935	0	0	134.725
HAC13	RASGRF2	4.05041	0	0	133.618
HAC13	ZFHX3	3.91927	0	0	132.809
HAC13	NTM	2.39044	0	0	132.496
HAC13	SORCS1	4.32869	0	0	132.424
HAC13	GALNTL6	4.80771	0	0	129.136
HAC13	NCAM2	4.01658	0	0	128.287
HAC13	ARHGAP24	3.87122	0	0	127.46
HAC13	RPH3A	3.85639	0	0	127.329
HAC13	DLGAP1	1.79605	0	0	126.622
HAC13	CSMD3	3.48252	0	0	125.701
HAC13	KLHL29	2.97334	0	0	124.115
HAC13	CDH4	3.41735	0	0	123.991
HAC13	PDZRN3	3.29316	0	0	121.881
HAC13	SORCS3	3.87206	0	0	119.311
HAC13	LINGO2	3.08985	0	0	119.308
HAC13	ROBO2	2.54987	0	0	115.881
HAC13	GREB1L	2.57422	0	0	115.432
HAC14	GRIK2	3.20357	0	0	137.205
HAC14	CDH18	3.27508	0	0	135.115
HAC14	NRXN1	2.26851	0	0	131.263
HAC14	GPC6	4.10452	0	0	126.041
HAC14	NCKAP5	3.62244	0	0	122.483
HAC14	CACNA2D3	3.61052	0	0	122.312
HAC14	NOVA1	2.55909	0	0	121.42
HAC14	ST6GALNAC3	3.20411	0	0	119.48
HAC14	PSD3	3.0181	0	0	116.769
HAC14	SLC24A3	2.91957	0	0	116.59
HAC14	NFIB	4.30066	0	0	116.157
HAC14	TCF4	3.1327	0	0	115.278
HAC14	TENM2	2.68739	0	0	112.801
HAC14	PREX2	3.84107	0	0	110.608
HAC14	KCND3	3.85593	0	0	105.532
HAC14	HS6ST3	2.91259	0	0	103.98
HAC14	NFIX	4.99331	0	0	103.749
HAC14	EBF1	3.67421	0	0	103.109
HAC14	GRID2	2.58939	0	0	102.699
HAC14	RHOBTB3	2.66107	0	0	100.815
HAC15	OPCML	3.8361	0	0	137.57
HAC15	TRHDE	4.76741	0	0	133.854
HAC15	TSHZ2	4.61449	0	0	129.395
HAC15	TRPM3	2.94267	0	0	126.181
HAC15	TCF4	3.39591	0	0	121.369
HAC15	MGAT4C	3.74314	0	0	120.942
HAC15	LINC02267	6.7893	0	0	119.09
HAC15	KIRREL3	3.11837	0	0	116.626
HAC15	GABRG3	3.35766	0	0	113.365
HAC15	AL109930.1	4.00132	0	0	112.65
HAC15	ZFPM2	2.30554	0	0	111.824
HAC15	LRRTM4	3.33006	0	0	108.587
HAC15	RBFOX3	2.55333	0	0	106.549
HAC15	NXPH2	3.66637	0	0	105.455
HAC15	UNC5C	3.11399	0	0	104.399
HAC15	RRBP1	3.55444	0	0	100.344
HAC15	SYNDIG1	2.7342	0	0	97.5759
HAC15	SLC35F1	2.56805	0	0	97.3349
HAC15	SGCZ	3.74637	0	0	96.5377
HAC15	CNIH3	2.96497	0	0	96.3342
HAC16	CHST9	4.88277	0	0	127.162
HAC16	INPP4B	3.57806	0	0	124.823
HAC16	GREB1L	3.08343	0	0	122.716
HAC16	TENM3	3.41359	0	0	121.101
HAC16	LRRC7	3.47184	0	0	118.382
HAC16	AQP4-AS1	3.93231	0	0	117.193
HAC16	ZFHX3	3.49355	0	0	115.578
HAC16	ZNF385D	2.41403	0	0	111.991
HAC16	GABBR2	2.63938	0	0	109.496
HAC16	ARHGAP24	3.32753	0	0	108.02
HAC16	PEX5L	3.2232	0	0	106.281
HAC16	ATRNL1	2.07109	0	0	104.238
HAC16	AC139720.1	3.21769	0	0	102.944
HAC16	PPFIBP1	2.66313	0	0	100.869
HAC16	SNTG1	2.51004	0	0	100.568
HAC16	ZFHX4	2.7725	0	0	98.4886
HAC16	FRAS1	3.58745	0	0	96.6322
HAC16	AC015878.1	2.86816	0	0	96.0649
HAC16	CADM1	2.03142	0	0	95.8569
HAC16	PBX1	2.13128	0	0	95.8114
HAC17	HS6ST3	4.9364	0	0	125.724
HAC17	NFIB	5.13845	0	0	114.729
HAC17	PROM1	7.6063	0	0	114.074
HAC17	GRIK2	2.94341	0	0	113.327
HAC17	CACNA2D3	4.03049	0	0	112.377
HAC17	DAB1	2.84828	0	0	112.36
HAC17	PREX2	4.65912	0	0	112.324
HAC17	EBF3	6.20203	0	0	111.973
HAC17	PSD3	3.40871	0	0	111.708
HAC17	SEMA3A	3.65539	0	0	111.106
HAC17	PTPRT	4.48113	0	0	110.934
HAC17	DLG1	3.81342	0	0	110.778
HAC17	NKAIN2	4.66936	0	0	109.914
HAC17	CDH18	2.92237	0	0	108.739
HAC17	ROBO2	2.91927	0	0	105.651
HAC17	PDE3B	4.62694	0	0	102.664
HAC17	TCF4	3.2221	0	0	101.815
HAC17	NRXN1	1.8526	0	0	99.1531
HAC17	TMTC2	2.52883	0	0	97.3981
HAC17	ZNF804A	2.71579	0	0	94.7831
HAC18	ROBO2	4.05853	0	0	122.554
HAC18	EBF1	4.84697	0	0	116.132
HAC18	SLC24A3	3.62065	0	0	115.045
HAC18	GPC6	4.31904	0	0	112.704
HAC18	GRM5	3.81612	0	0	111.498
HAC18	TENM2	3.08903	0	0	110.329
HAC18	PSD3	3.29645	0	0	109.665
HAC18	LINC00535	3.98514	0	0	108.755
HAC18	GABRB2	3.34427	0	0	108.585
HAC18	LDB2	3.07117	0	0	105.589
HAC18	TCF4	3.33608	0	0	104.945
HAC18	RGS6	3.62624	0	0	104.002
HAC18	AGBL4	2.84857	0	0	102.865
HAC18	SEMA3E	6.48344	0	0	102.593
HAC18	NKAIN4	6.61366	0	0	98.1332
HAC18	SAMD5	3.51528	0	0	97.9087
HAC18	PKD2L1	8.45573	0	0	97.0246
HAC18	ST18	4.01947	0	0	96.1246
HAC18	DACH1	2.38265	0	0	94.5461
HAC18	PCDH7	3.01521	0	0	93.8725
HAC19	NCAM2	4.9347	0	0	110.843
HAC19	SEMA6D	4.29254	0	0	103.23
HAC19	HTR2C	5.70689	0	0	100.564
HAC19	GALNTL6	4.9408	0	0	100.379
HAC19	CACNA1E	3.3999	0	0	98.8943
HAC19	PTPN13	3.06851	0	0	91.6254
HAC19	FRMD4A	1.8744	0	0	91.1725
HAC19	KHDRBS3	3.0373	0	0	89.2427
HAC19	DLGAP2	2.80287	0	0	88.589
HAC19	KHDRBS2	2.04498	0	0	84.5616
HAC19	SORBS2	2.91007	0	0	84.4064
HAC19	KLHL1	2.46494	0	0	81.3415
HAC19	GABBR2	2.19244	0	0	79.9464
HAC19	GRM3	2.52717	0	0	79.5933
HAC19	SCN3A	2.34751	0	0	76.0796
HAC19	DACH2	2.38353	0	0	75.7217
HAC19	ASAP2	2.50396	0	0	75.4457
HAC19	GRM5	2.45492	0	0	75.2144
HAC19	SYT10	4.66634	0	0	74.9108
HAC19	CRIM1	2.18993	0	0	74.5136
HAC20	FILIP1L	3.89996	0	0	101.297
HAC20	ESRRG	3.17851	0	0	99.1898
HAC20	BICD1	2.68294	0	0	98.2555
HAC20	RYR3	2.88667	0	0	98.0678
HAC20	RPH3A	3.97422	0	0	96.2377
HAC20	BICC1	3.63478	0	0	95.9302
HAC20	CDH12	3.27725	0	0	93.5221
HAC20	CCDC85A	2.79337	0	0	92.8698
HAC20	RYR2	2.48259	0	0	92.3586
HAC20	LINC01933	4.16679	0	0	92.2201
HAC20	KALRN	2.75861	0	0	92.1524
HAC20	FSTL4	2.65194	0	0	91.8569
HAC20	CALN1	3.19627	0	0	90.5941
HAC20	CDH7	2.85803	0	0	87.2075
HAC20	CMSS1	2.66457	0	0	86.1022
HAC20	ASTN2	2.36412	0	0	85.6885
HAC20	KHDRBS3	2.99733	0	0	84.6637
HAC20	DACH2	2.9361	0	0	84.6068
HAC20	PTPRK	2.59286	0	0	84.531
HAC20	TENM1	2.30716	0	0	84.4999
HAC21	PRKG1	4.91971	0	0	105.997
HAC21	VSTM2B	4.56395	0	0	103.051
HAC21	NFIA	5.22942	0	0	101.992
HAC21	CARTPT	5.73184	0	0	101.72
HAC21	PTPRM	3.95635	0	0	100.779
HAC21	PRKCB	2.42059	0	0	100.523
HAC21	SCG2	5.02182	0	0	100.318
HAC21	MAGI3	2.60414	0	0	99.5453
HAC21	SPOCK3	2.96877	0	0	99.5395
HAC21	KCNB2	3.86225	0	0	99.304
HAC21	GPC6	4.29872	0	0	97.356
HAC21	GAD1	2.91499	0	0	97.2891
HAC21	GRM5	3.74186	0	0	97.1047
HAC21	LRRTM4	4.23802	0	0	96.7812
HAC21	ARHGAP20	3.76859	0	0	95.8431
HAC21	RMST	4.35018	0	0	95.7604
HAC21	SEMA6D	4.25535	0	0	94.7351
HAC21	NFIA-AS2	4.73795	0	0	94.036
HAC21	SV2C	5.40376	0	0	93.7822
HAC21	PBX1	2.73652	0	0	90.648
HAC22	SLIT2	3.8756	0	0	102.45
HAC22	ADAMTS9-AS2	5.50324	0	0	101.989
HAC22	ADARB2	4.00717	0	0	95.247
HAC22	MAN1A1	4.15992	0	0	95.2428
HAC22	CBLN2	4.69253	0	0	90.5257
HAC22	LINGO2	3.16983	0	0	87.7188
HAC22	ZFHX3	3.39427	0	0	87.2617
HAC22	LDB2	2.82884	0	0	86.4937
HAC22	PPFIBP1	2.94991	0	0	84.5075
HAC22	ERBB4	3.75002	0	0	82.955
HAC22	POU6F2	2.86481	0	0	82.849
HAC22	CHST9	3.75739	0	0	80.2571
HAC22	NDST3	3.487	0	0	79.835
HAC22	KHDRBS2	2.0629	0	0	77.291
HAC22	KCNQ5	3.27283	0	0	74.8449
HAC22	AQP4-AS1	3.08615	0	0	73.684
HAC22	VIPR2	5.94375	0	0	72.4963
HAC22	COL4A4	2.7278	0	0	71.6027
HAC22	GRM7	2.18751	0	0	71.5072
HAC22	PTPRG	1.85884	0	0	70.0357
HAC23	RNF220	5.19223	0	0	99.5755
HAC23	ADAMTS9-AS2	5.39138	0	0	99.4385
HAC23	NRG1	4.03115	0	0	97.5688
HAC23	SORCS3	4.23977	0	0	89.1601
HAC23	ZFHX3	3.51137	0	0	89.1351
HAC23	PTPRM	3.00056	0	0	83.6821
HAC23	CTNNA2	2.28294	0	0	83.2487
HAC23	CNTNAP5	3.71435	0	0	82.9402
HAC23	SLIT2	2.85427	0	0	82.8943
HAC23	LRP2	4.5724	0	0	80.6226
HAC23	CCDC144A	2.91621	0	0	80.0756
HAC23	DMD	2.79069	0	0	79.5363
HAC23	POU6F2	2.66551	0	0	77.9717
HAC23	NDST3	3.40178	0	0	77.9067
HAC23	PAM	1.76806	0	0	76.9725
HAC23	PBX1	2.11498	0	0	72.4998
HAC23	SOX5	2.37643	0	0	72.2481
HAC23	KIRREL3	2.59137	0	0	72.093
HAC23	UNC5D	2.54002	0	0	69.9899
HAC23	PALLD	2.83849	0	0	69.8055
HAC24	CALN1	3.58257	0	0	91.6235
HAC24	GPC6	3.87773	0	0	88.7503
HAC24	CNTN3	3.40857	0	0	85.5238
HAC24	GLRA3	3.68766	0	0	81.8162
HAC24	OPCML	2.78574	0	0	81.6724
HAC24	AL589740.1	4.6338	0	0	81.1448
HAC24	PRKG1	3.36914	0	0	80.8127
HAC24	ERBB4	3.6782	0	0	80.6645
HAC24	AKAP13	2.73274	0	0	75.2904
HAC24	KCNB2	2.77453	0	0	74.6862
HAC24	FRMPD4	3.89258	0	0	73.488
HAC24	IQCA1	3.21351	0	0	72.8033
HAC24	PTPRT	3.20536	0	0	72.7848
HAC24	RAPGEF4	1.90856	0	0	71.1203
HAC24	LINC02055	6.81347	0	0	69.4149
HAC24	SOX5	2.31006	0	0	68.9409
HAC24	PTPRM	2.32493	0	0	66.7822
HAC24	CSMD3	2.29828	0	0	66.2451
HAC24	CNTN4	1.94115	0	0	65.41
HAC24	SIPA1L3	1.64864	0	0	64.9529
HAC25	GALNTL6	6.55279	0	0	104.389
HAC25	SLIT2	3.78687	0	0	99.6263
HAC25	PTPRG	2.87573	0	0	97.102
HAC25	MED12L	3.52227	0	0	95.9786
HAC25	ADGRL2	4.51746	0	0	95.2471
HAC25	BRINP3	4.14352	0	0	94.3884
HAC25	SEMA6D	4.28971	0	0	94.0246
HAC25	ZNF804B	4.90695	0	0	90.753
HAC25	PCDH15	3.66932	0	0	89.8106
HAC25	ANKFN1	4.80494	0	0	88.7851
HAC25	TENM3	3.20598	0	0	88.3138
HAC25	KHDRBS2	2.43339	0	0	87.6184
HAC25	UNC5D	3.07148	0	0	87.4313
HAC25	SH3RF3	3.49596	0	0	86.5542
HAC25	ERBB4	3.91562	0	0	85.8266
HAC25	FGF13	2.80333	0	0	85.6547
HAC25	CCDC85A	2.61547	0	0	84.8831
HAC25	DCLK1	2.64276	0	0	84.3069
HAC25	CNTNAP4	2.70929	0	0	84.0846
HAC25	TENM1	2.39356	0	0	83.7237
HAC26	ZFHX3	4.67311	0	0	94.6618
HAC26	CCDC39	6.88948	0	0	93.9147
HAC26	SLC5A7	6.2711	0	0	93.3265
HAC26	SLC24A4	6.38126	0	0	93.2713
HAC26	KIAA1217	4.4044	0	0	93.1252
HAC26	CACNA1B	3.0411	0	0	91.6855
HAC26	DOK5	3.4512	0	0	89.4334
HAC26	SLC35F4	4.78452	0	0	88.5966
HAC26	RBFOX1	4.1481	0	0	88.3481
HAC26	RBMS3	4.35447	0	0	86.0894
HAC26	ADAMTS18	4.61961	0	0	85.0801
HAC26	PAPPA2	4.37665	0	0	83.8745
HAC26	ZMAT4	3.26875	0	0	83.1365
HAC26	TENM2	2.98106	0	0	82.0031
HAC26	SLIT2	3.11181	0	0	79.8301
HAC26	WIF1	5.28627	0	0	78.884
HAC26	MTUS2	2.66062	0	0	77.4901
HAC26	GNG7	2.89176	0	0	76.8236
HAC26	GALNT7	2.96925	0	0	76.455
HAC26	PRICKLE2	2.35002	0	0	76.2805
HAC27	CACNA1E	3.82071	0	0	85.5924
HAC27	PTCHD1-AS	3.99212	0	0	80.3154
HAC27	PCDH9	3.0364	0	0	79.2537
HAC27	PCDH11X	4.06646	0	0	78.5407
HAC27	ROBO1	2.90148	0	0	77.9909
HAC27	CPNE8	3.31165	0	0	76.6228
HAC27	GALNT17	2.866	0	0	74.5716
HAC27	DPP10	3.48226	0	0	73.6046
HAC27	TRPM3	2.49628	0	0	72.2707
HAC27	SLC4A4	3.20335	0	0	71.6127
HAC27	CNTN5	2.94847	0	0	71.4294
HAC27	DACH2	2.90646	0	0	70.2837
HAC27	KCNJ3	2.33406	0	0	67.8137
HAC27	PTCHD4	2.78687	0	0	67.2327
HAC27	RGS6	3.04048	0	0	66.9216
HAC27	CADM1	2.08062	0	0	66.7043
HAC27	NTM	1.78497	0	0	65.136
HAC27	INPP4B	2.35014	0	0	64.0933
HAC27	AC006148.1	2.02116	0	0	64.0779
HAC27	SCN3A	2.54306	0	0	63.5746
HAC28	RMST	5.06804	0	0	91.6562
HAC28	RNF220	5.15386	0	0	88.7857
HAC28	NCAM2	4.5651	0	0	88.4783
HAC28	DGKB	5.75165	0	0	87.6548
HAC28	LRP1B	3.75758	0	0	86.779
HAC28	SERPINI1	3.93686	0	0	85.6904
HAC28	L3MBTL4	3.82926	0	0	81.8101
HAC28	DACH2	3.4067	0	0	80.898
HAC28	VIP	8.96059	0	0	80.407
HAC28	NRG1	3.09114	0	0	80.1996
HAC28	PCDH11X	4.20009	0	0	80.1565
HAC28	PLCXD3	5.66788	0	0	80.1552
HAC28	DLGAP2	3.13609	0	0	79.8487
HAC28	TENM3	3.19261	0	0	79.7053
HAC28	PDZRN4	5.04329	0	0	79.1006
HAC28	CTNNA2	2.39179	0	0	78.785
HAC28	GRM5	3.2533	0	0	78.4927
HAC28	KCNB2	3.19259	0	0	77.5361
HAC28	PTPRM	3.12513	0	0	77.3352
HAC28	CNTN6	3.4549	0	0	74.873
HAC29	LINC01933	4.82768	0	0	89.4388
HAC29	ASTN2	3.01744	0	0	87.3644
HAC29	PCDH15	4.25004	0	0	87.1094
HAC29	CNTNAP4	3.24108	0	0	86.0606
HAC29	CCDC85A	2.98194	0	0	83.8536
HAC29	FSTL4	2.82084	0	0	83.3184
HAC29	CACHD1	3.96945	0	0	83.1522
HAC29	ADARB2	3.93819	0	0	82.2453
HAC29	SH3RF3	3.62326	0	0	80.7403
HAC29	ESRRG	2.93125	0	0	80.3494
HAC29	MED12L	3.13644	0	0	80.3053
HAC29	SEMA6D	3.79071	0	0	80.2326
HAC29	NTRK2	2.29546	0	0	80.1383
HAC29	KCND2	3.71216	0	0	78.7124
HAC29	LCNL1	4.42581	0	0	78.1511
HAC29	CALN1	3.07517	0	0	77.6599
HAC29	KHDRBS3	3.20459	0	0	77.2566
HAC29	DCLK1	2.64852	0	0	76.356
HAC29	FMN1	2.91439	0	0	76.1454
HAC29	PTPRK	2.67646	0	0	75.3128
HAC30	PBX3	4.12702	0	0	84.2692
HAC30	AL133346.1	3.99714	0	0	82.1695
HAC30	SGCD	4.63948	0	0	81.879
HAC30	NTNG1	4.04006	0	0	81.7935
HAC30	CNTNAP5	3.84585	0	0	81.2943
HAC30	DCC	3.02155	0	0	79.7711
HAC30	PBX1	2.73421	0	0	78.9352
HAC30	PTPRT	3.98077	0	0	78.1747
HAC30	RYR3	2.68199	0	0	77.7628
HAC30	SEMA6D	3.77208	0	0	75.5787
HAC30	SNTG1	2.76884	0	0	73.8171
HAC30	MYOM1	3.41418	0	0	73.5721
HAC30	TMTC1	2.28954	0	0	73.2472
HAC30	PHACTR2	3.2278	0	0	72.7201
HAC30	GRIK1	3.96099	0	0	72.0709
HAC30	ERBB4	3.59507	0	0	68.6782
HAC30	LRP2	4.22925	0	0	68.6634
HAC30	NRG1	2.79464	0	0	67.8421
HAC30	CHST9	3.5987	0	0	67.6323
HAC30	LRP1B	2.56478	0	0	64.6266
HAC31	SGCZ	6.44558	0	0	91.646
HAC31	TRHDE	4.88106	0	0	87.9145
HAC31	GRM7	3.28747	0	0	82.4938
HAC31	DOCK4	2.65908	0	0	81.3498
HAC31	KIRREL3	3.41844	0	0	80.0305
HAC31	UNC5C	3.63994	0	0	79.3999
HAC31	TRPM3	2.86136	0	0	78.8854
HAC31	LINC00535	3.98235	0	0	78.6685
HAC31	CNTN3	3.54813	0	0	77.7864
HAC31	GLRA3	3.97384	0	0	77.2481
HAC31	MGAT4C	3.46279	0	0	75.9943
HAC31	TCF4	3.18787	0	0	74.3382
HAC31	LRRTM3	2.96714	0	0	73.787
HAC31	KCTD16	2.92153	0	0	73.7496
HAC31	CNTN4	2.5244	0	0	73.5822
HAC31	SYN3	2.89162	0	0	70.0415
HAC31	NFIA	3.45385	0	0	69.2412
HAC31	ZNF804A	2.61982	0	0	68.9377
HAC31	CDK14	2.33716	0	0	68.4375
HAC31	GRM5	2.89032	0	0	67.4973
HAC32	NRG1	3.57483	0	0	81.092
HAC32	LHFPL3	3.48225	0	0	75.5947
HAC32	SEMA6D	3.86778	0	0	74.6952
HAC32	PBX1	2.4947	0	0	71.7623
HAC32	ROBO1	2.72649	0	0	70.9243
HAC32	PCDH11X	4.09809	0	0	70.7879
HAC32	KHDRBS3	2.81818	0	0	66.2563
HAC32	AC019068.1	5.43193	0	0	65.3965
HAC32	SORCS3	3.34619	0	0	64.5144
HAC32	CDH18	2.34985	0	0	64.1226
HAC32	CACNA1E	2.61467	0	0	62.4001
HAC32	SH3RF3	2.77633	0	0	59.2051
HAC32	GAD2	2.0315	0	0	58.4078
HAC32	COL25A1	4.21421	0	0	57.3107
HAC32	LRRTM4	2.63428	0	0	56.8272
HAC32	PALLD	2.88378	0	0	55.9737
HAC32	ASB18	5.40973	0	0	55.2975
HAC32	NKAIN2	3.74429	0	0	54.19
HAC32	DAPL1	4.7627	0	0	53.4584
HAC32	DPP10	3.42834	0	0	53.398
HAC33	ROBO2	3.95487	0	0	88.7237
HAC33	EBF3	6.35488	0	0	86.8932
HAC33	AC109466.1	6.22951	0	0	86.809
HAC33	TENM2	3.37826	0	0	85.527
HAC33	GRIK2	3.12774	0	0	85.2207
HAC33	SLC24A3	3.59941	0	0	83.9393
HAC33	CNTN5	3.99901	0	0	83.8423
HAC33	GPC6	4.38253	0	0	83.2927
HAC33	AC008415.1	5.47383	0	0	82.2179
HAC33	ARHGAP18	8.6563	0	0	82.041
HAC33	LUZP2	3.47115	0	0	81.714
HAC33	CDH18	3.0472	0	0	81.2869
HAC33	MGAT4C	3.99957	0	0	80.6081
HAC33	CACNA2D3	3.79383	0	0	79.0968
HAC33	KCND3	4.05388	0	0	75.6712
HAC33	EBF1	4.00903	0	0	74.4935
HAC33	PTPRT	3.79272	0	0	74.0735
HAC33	ST18	4.33118	0	0	73.3204
HAC33	TCF4	3.07641	0	0	71.7969
HAC33	LINGO2	3.02294	0	0	71.0399
HAC34	GALNTL6	5.99651	0	0	86.6779
HAC34	CNTN5	3.56037	0	0	78.2331
HAC34	PPFIBP1	3.22304	0	0	77.4893
HAC34	ADARB2	3.80736	0	0	76.9695
HAC34	CCBE1	4.63115	0	0	72.7402
HAC34	GRM5	2.99063	0	0	70.9175
HAC34	LRP1B	2.94169	0	0	69.9828
HAC34	LINGO2	2.85965	0	0	69.3267
HAC34	ERBB4	3.53501	0	0	68.944
HAC34	PCDH11X	3.52842	0	0	68.5233
HAC34	CACNA1E	2.85358	0	0	67.8649
HAC34	SEMA6D	3.4039	0	0	67.1781
HAC34	TENM3	2.73623	0	0	66.7304
HAC34	FRAS1	3.65164	0	0	65.9166
HAC34	ELAVL2	3.92523	0	0	65.5824
HAC34	KAZN	2.63141	0	0	64.2988
HAC34	GABBR2	2.20011	0	0	63.0315
HAC34	LINC01090	3.39556	0	0	61.2219
HAC34	LTBP1	3.91131	0	0	61.0156
HAC34	POU6F2	2.32453	0	0	58.6906
HAC35	SORBS2	3.18086	0	0	72.0361
HAC35	PDE4B	2.72206	0	0	68.4752
HAC35	IL1RAPL1	2.1587	0	0	68.3121
HAC35	IL1RAPL2	4.93836	0	0	67.1672
HAC35	RALYL	2.82012	0	0	66.8571
HAC35	AL133346.1	3.23359	0	0	66.6155
HAC35	ZFHX3	3.19345	0	0	66.5759
HAC35	DLGAP1	1.59319	0	0	66.5639
HAC35	SYN3	2.78871	0	0	65.5113
HAC35	CNTN4	2.46829	0	0	65.3819
HAC35	DMD	2.84616	0	0	64.5923
HAC35	DGKH	2.56631	0	0	63.9854
HAC35	HS6ST3	3.07633	0	0	63.7417
HAC35	STXBP6	3.82047	0	0	60.6835
HAC35	PCDH11X	3.24134	0	0	59.8153
HAC35	PDZRN3	2.64295	0	0	59.282
HAC35	SORCS1	3.31408	0	0	58.9454
HAC35	RASGRF2	3.05324	0	0	58.1274
HAC35	DCC	2.30909	0	0	57.8755
HAC35	POU6F2	2.40933	0	0	57.6597
HAC36	ADARB2	4.51981	0	0	79.3939
HAC36	PTPRG	3.02239	0	0	77.6867
HAC36	GRM1	3.68306	0	0	73.4302
HAC36	SLIT2	3.21216	0	0	70.5597
HAC36	KHDRBS2	2.50768	0	0	69.9648
HAC36	SEMA6D	3.65836	0	0	65.3187
HAC36	CSMD1	3.02877	0	0	64.9426
HAC36	PPFIBP1	2.88698	0	0	64.5029
HAC36	FHIT	2.54828	0	0	63.3518
HAC36	ZFHX3	3.058	0	0	62.1285
HAC36	SYT10	4.98865	0	0	61.8971
HAC36	TMEM132D	3.25199	0	0	60.6161
HAC36	CNTNAP4	2.41509	0	0	59.1948
HAC36	GRM5	2.68026	0	0	58.4682
HAC36	LINC00200	3.57652	0	0	56.9073
HAC36	CDH20	3.02694	0	0	55.9779
HAC36	ASTN2	2.00459	0	0	55.4406
HAC36	CCDC85A	2.08035	0	0	55.1542
HAC36	UNC5D	2.35799	0	0	54.9303
HAC36	PCDH9	2.43981	0	0	54.3603
HAC37	GPC5	5.99775	0	0	76.853
HAC37	NELL1	5.79007	0	0	72.5889
HAC37	NCAM2	3.77395	0	0	66.7059
HAC37	DMD	3.13175	0	0	65.8799
HAC37	LRP1B	3.25732	0	0	65.4222
HAC37	LHFPL3	3.42164	0	0	64.7726
HAC37	CNTN5	3.30188	0	0	64.0847
HAC37	HDAC9	2.5198	0	0	63.4124
HAC37	GALNTL6	3.71015	0	0	62.2384
HAC37	SORCS3	4.57761	0	0	61.8608
HAC37	SLIT1	3.60189	0	0	61.85
HAC37	FSTL5	3.34022	0	0	59.3389
HAC37	KCNQ5	3.47237	0	0	58.0545
HAC37	FRMPD4	3.48621	0	0	57.2277
HAC37	KCNQ3	2.62005	0	0	55.4226
HAC37	CCBE1	4.32311	0	0	55.2268
HAC37	SLC44A5	2.75916	0	0	54.7577
HAC37	NDST3	2.83995	0	0	54.3325
HAC37	AC019068.1	4.94569	0	0	53.8024
HAC37	NRG1	2.42813	0	0	53.6363
HAC38	ADAMTS9-AS2	6.04127	0	0	75.8871
HAC38	SLIT2	3.91019	0	0	72.8919
HAC38	CSMD1	3.94273	0	0	72.7664
HAC38	MAN1A1	4.36243	0	0	70.5009
HAC38	PARD3	2.93341	0	0	66.702
HAC38	CPAMD8	4.3896	0	0	64.2701
HAC38	ADARB2	3.72691	0	0	63.9596
HAC38	LRP2	4.86365	0	0	63.0038
HAC38	ZFHX3	3.30993	0	0	61.48
HAC38	SEMA3D	5.39332	0	0	56.6868
HAC38	NTM	1.89937	0	0	56.2741
HAC38	NELL2	4.26242	0	0	56.0911
HAC38	CNTN5	2.83419	0	0	55.3312
HAC38	KCNB2	2.7105	0	0	54.3358
HAC38	EPHA6	2.26622	0	0	53.901
HAC38	CHST9	3.81072	0	0	53.6142
HAC38	TRPM3	2.18774	0	0	52.6057
HAC38	FSTL4	2.06962	0	0	51.8577
HAC38	DCC	2.33558	0	0	51.2938
HAC38	XKR4	1.84145	0	0	51.2657
HAC39	PCDH11X	5.55815	0	0	71.072
HAC39	PTPRD	3.1291	0	0	69.9844
HAC39	LHFPL3	4.31524	0	0	69.0094
HAC39	ROBO2	3.45662	0	0	66.0186
HAC39	NPAS3	3.23857	0	0	60.8744
HAC39	ROBO1	3.43789	0	0	60.6108
HAC39	GLIS3	4.51401	0	0	60.4135
HAC39	FRMD4A	2.03768	0	0	60.0766
HAC39	NOS1	5.65746	0	0	59.0506
HAC39	NXPH1	4.51882	0	0	58.5163
HAC39	GRIK1	4.17649	0	0	57.4736
HAC39	NDST4	5.30042	0	0	53.6663
HAC39	AL589740.1	4.25132	0	0	53.0502
HAC39	PTPRT	3.28325	0	0	52.8245
HAC39	FARP1	2.14999	0	0	52.6336
HAC39	EML6	2.54527	0	0	52.5437
HAC39	AC019068.1	5.63076	0	0	52.4354
HAC39	TSHZ2	3.20423	0	0	52.0791
HAC39	NECAB1	3.36411	0	0	49.7597
HAC39	CHL1	5.33683	0	0	49.2515
HAC40	CNTN5	4.08917	0	0	66.1332
HAC40	NRG1	3.11478	0	0	59.5291
HAC40	FBXL7	2.71383	0	0	53.2431
HAC40	SCN1A	2.98295	0	0	52.941
HAC40	KAZN	2.83755	0	0	52.7398
HAC40	SORCS3	3.63383	0	0	52.5365
HAC40	ZMAT4	2.68888	0	0	52.3958
HAC40	SORBS2	2.58693	0	0	51.5986
HAC40	ELMO1	2.14256	0	0	50.8931
HAC40	SLC4A4	2.99415	0	0	50.7415
HAC40	PCDH7	2.86671	0	0	50.7191
HAC40	CUX2	2.47704	0	0	50.4938
HAC40	RYR3	2.25084	0	0	50.4423
HAC40	GALNT17	2.6054	0	0	50.3295
HAC40	KHDRBS3	2.7459	0	0	49.6726
HAC40	NAV2	2.244	0	0	48.9047
HAC40	PTPN13	2.62364	0	0	48.7218
HAC40	ENOX1	2.12233	0	0	48.3822
HAC40	MAF	3.59921	0	0	48.0506
HAC40	CACNA1E	2.54451	0	0	47.6527
HAC41	AC109466.1	7.03763	0	0	69.4665
HAC41	LRRTM4	4.72977	0	0	67.2068
HAC41	AC008415.1	6.17577	0	0	66.4311
HAC41	EBF3	6.3456	0	0	65.9583
HAC41	CNTN5	4.00256	0	0	64.7655
HAC41	NCAM2	4.49402	0	0	62.4041
HAC41	GPC6	4.25376	0	0	62.0596
HAC41	NRXN1	2.1181	0	0	60.6966
HAC41	CACNA2D3	3.8312	0	0	60.6635
HAC41	ROBO2	3.04834	0	0	60.4255
HAC41	TENM2	3.0183	0	0	60.2303
HAC41	PTPRT	4.21877	0	0	59.7479
HAC41	UNC5D	3.26932	0	0	59.3948
HAC41	GRIK2	2.67644	0	0	59.0411
HAC41	CDH18	2.71179	0	0	57.8764
HAC41	GRID2	2.96594	0	0	56.9694
HAC41	LIMCH1	3.07936	0	0	55.4487
HAC41	TCF4	3.12506	0	0	55.4011
HAC41	SLC24A3	2.92338	0	0	55.2353
HAC41	C2orf27A	3.51721	0	0	52.7806
HAC42	KLHL29	3.02437	0	0	60.8204
HAC42	KLHL1	3.19059	0	0	59.6729
HAC42	ANOS1	3.99508	0	0	59.6514
HAC42	PLCXD3	5.38031	0	0	58.7153
HAC42	PDZRN4	4.68378	0	0	58.2094
HAC42	SERPINI1	3.25607	0	0	57.4403
HAC42	NCAM2	3.77013	0	0	56.484
HAC42	ENPP1	4.65251	0	0	56.406
HAC42	CNTN3	3.29136	0	0	56.2469
HAC42	SORBS1	2.43499	0	0	55.5407
HAC42	ITPR1	3.19995	0	0	55.3592
HAC42	SEMA5B	6.32072	0	0	54.1067
HAC42	GRID2	2.68833	0	0	53.1017
HAC42	ST6GALNAC5	2.92469	0	0	53.0864
HAC42	LRRC8D	2.69716	0	0	53.0608
HAC42	ROBO1	2.56398	0	0	52.6442
HAC42	RAB31	3.84988	0	0	52.1843
HAC42	VWC2L	2.96441	0	0	51.9753
HAC42	SGCD	3.61564	0	0	51.8423
HAC42	PREX2	3.27942	0	0	51.6098
HAC43	CDH13	4.72819	0	0	59.3424
HAC43	CNTNAP5	3.58212	0	0	52.6871
HAC43	ADARB2	3.3686	0	0	49.9577
HAC43	PBX3	3.33121	0	0	48.7473
HAC43	PBX1	2.37548	0	0	48.3784
HAC43	MARCH3	2.59064	0	0	48.0415
HAC43	PHACTR2	3.342	0	0	46.7201
HAC43	RMST	3.54645	0	0	46.6731
HAC43	CADM1	2.12172	0	0	46.3883
HAC43	ZFHX3	2.79856	0	0	45.988
HAC43	SNTG1	2.41712	0	0	45.1946
HAC43	ASIC2	2.1049	0	0	43.1849
HAC43	KIRREL3	2.35142	0	0	41.5854
HAC43	CALN1	2.50333	0	0	41.4358
HAC43	ZMAT4	2.23014	0	0	41.1975
HAC43	ADCY2	2.27895	0	0	40.5952
HAC43	ATRNL1	1.73032	0	0	39.8688
HAC43	DSCAM	2.12285	0	0	39.6263
HAC43	SEMA6D	2.92506	0	0	38.9884
HAC43	NRG1	2.27216	0	0	38.1236
HAC44	LRRTM4	4.91031	0	0	62.7905
HAC44	ROBO2	3.72968	0	0	61.1449
HAC44	ROBO1	3.84869	0	0	60.3509
HAC44	MYO16	6.38468	0	0	59.4852
HAC44	SGCZ	4.95369	0	0	58.0778
HAC44	PCDH11X	4.70578	0	0	57.7537
HAC44	ZFHX3	3.81715	0	0	56.8817
HAC44	DGKH	3.1562	0	0	56.0199
HAC44	GRIK1	4.45548	0	0	55.4747
HAC44	PTPRT	4.11677	0	0	54.7996
HAC44	CNTN3	3.46181	0	0	53.5638
HAC44	UNC5D	3.08809	0	0	53.1428
HAC44	CPNE8	3.34916	0	0	52.2379
HAC44	PALLD	3.33549	0	0	50.9363
HAC44	DCN	6.69734	0	0	50.6385
HAC44	KLHL1	2.91473	0	0	50.1684
HAC44	RBMS3	3.80918	0	0	49.6914
HAC44	FARP1	2.31856	0	0	49.5837
HAC44	OPCML	2.7169	0	0	49.2467
HAC44	CDH18	2.3758	0	0	48.7261
HAC45	GPC5	6.05379	0	0	63.7665
HAC45	THRB	4.49668	0	0	62.6851
HAC45	ARPP21	6.31121	0	0	62.5392
HAC45	BRINP3	4.73271	0	0	61.3157
HAC45	PEX5L	4.67284	0	0	60.8056
HAC45	GRIK1	4.95717	0	0	60.1671
HAC45	DPP10	4.76455	0	0	59.791
HAC45	DOCK8	9.06609	0	0	59.4783
HAC45	KLHL1	3.67074	0	0	59.0787
HAC45	COL21A1	7.31108	0	0	57.6178
HAC45	TAC1	7.91235	0	0	56.8281
HAC45	CTNNA2	2.61791	0	0	56.3263
HAC45	EYA1	8.70095	0	0	56.3164
HAC45	NKAIN2	4.43762	0	0	56.2335
HAC45	ROBO2	3.1371	0	0	56.1461
HAC45	ZNF804B	4.7675	0	0	55.9032
HAC45	ADAMTS20	4.7968	0	0	55.6552
HAC45	NR2F2-AS1	4.17949	0	0	55.0799
HAC45	PCDH11X	4.08013	0	0	54.0552
HAC45	ALCAM	4.92312	0	0	53.8058
HAC46	GALNTL6	5.94116	0	0	60.2987
HAC46	IL1RAPL2	5.61721	0	0	60.2398
HAC46	CNTN4	3.18982	0	0	59.8619
HAC46	DCC	3.48645	0	0	59.2338
HAC46	NOS1	5.82219	0	0	58.9701
HAC46	RASGRF2	3.77828	0	0	56.3398
HAC46	DMD	3.43881	0	0	56.2082
HAC46	GRM7	3.04137	0	0	55.2679
HAC46	SORCS1	3.7706	0	0	53.9971
HAC46	CDH20	3.88947	0	0	53.9908
HAC46	PDZRN3	3.18434	0	0	52.887
HAC46	SORCS3	3.69487	0	0	52.2945
HAC46	GRIN2A	2.35938	0	0	52.1846
HAC46	GRID1	2.89999	0	0	50.7951
HAC46	UNC5D	2.86551	0	0	49.7843
HAC46	GRM5	2.8861	0	0	49.0294
HAC46	ZNF385D	2.29519	0	0	48.6535
HAC46	PTH2R	4.67459	0	0	48.4487
HAC46	GALNT17	2.6662	0	0	48.4146
HAC46	STXBP6	3.68029	0	0	48.4043
HAC47	GALNTL6	6.55802	0	0	57.5845
HAC47	NCAM2	5.15893	0	0	57.0268
HAC47	SGCD	5.04868	0	0	55.7252
HAC47	CNTNAP5	4.38304	0	0	55.5532
HAC47	DPP10	4.96875	0	0	54.9238
HAC47	DCC	3.49318	0	0	54.5976
HAC47	ROBO2	3.52736	0	0	53.8705
HAC47	PCDH15	4.17918	0	0	53.4549
HAC47	DMD	3.25999	0	0	49.7151
HAC47	ZFHX4	3.29523	0	0	49.5768
HAC47	RBMS3	3.9557	0	0	48.7847
HAC47	ZFHX3	3.4639	0	0	47.8175
HAC47	VSNL1	3.17279	0	0	47.8142
HAC47	ADARB2	3.61251	0	0	46.9577
HAC47	OPCML	2.84125	0	0	46.8099
HAC47	LINGO2	3.05819	0	0	46.7379
HAC47	SGCZ	3.79246	0	0	46.7215
HAC47	NKAIN3	5.58923	0	0	46.3171
HAC47	SCG2	3.58204	0	0	45.5802
HAC47	BRINP3	3.22995	0	0	45.2837
HAC48	LRRTM4	4.78447	0	0	56.0344
HAC48	PPP2R2B	2.53997	0	0	51.7363
HAC48	GRIK1	4.73409	0	0	51.5397
HAC48	PRKG1	4.22342	0	0	51.4873
HAC48	SGCZ	4.84227	0	0	50.9213
HAC48	PCDH15	3.91743	0	0	50.9131
HAC48	ROBO2	3.17853	0	0	50.7158
HAC48	DCC	3.16618	0	0	49.8196
HAC48	CSGALNACT1	4.1367	0	0	49.7561
HAC48	SMOC2	6.07377	0	0	49.0474
HAC48	NLGN1	3.06135	0	0	48.1573
HAC48	EPHA6	2.73549	0	0	47.9836
HAC48	CNTNAP5	3.70401	0	0	46.8567
HAC48	CDH4	3.15818	0	0	46.5627
HAC48	NXPH1	4.20544	0	0	46.1124
HAC48	PTPRT	3.58286	0	0	46.0543
HAC48	ZFHX3	3.32557	0	0	46.0161
HAC48	OPCML	2.96529	0	0	45.9028
HAC48	MIR99AHG	3.36098	0	0	45.8903
HAC48	DAB1	2.41455	0	0	45.5309
HAC49	TSPAN9	3.32978	0	0	50.5985
HAC49	ASIC2	2.83486	0	0	50.4958
HAC49	FILIP1L	3.77743	0	0	50.2967
HAC49	LRRC4C	4.46619	0	0	49.979
HAC49	CAMK1D	2.61441	0	0	49.4202
HAC49	THSD4	4.00225	0	0	49.0919
HAC49	NEDD4L	2.48718	0	0	48.5457
HAC49	NAV2	2.87207	0	0	48.4432
HAC49	SIPA1L3	2.32929	0	0	47.6883
HAC49	CTIF	2.80175	0	0	47.4128
HAC49	AC073114.1	4.59779	0	0	47.2791
HAC49	XYLT1	2.77081	0	0	47.0125
HAC49	ANK1	2.79099	0	0	46.032
HAC49	DSCAM	2.703	0	0	45.9061
HAC49	PHACTR3	2.73938	0	0	45.4233
HAC49	CACNA1B	2.11361	0	0	43.9103
HAC49	ATRNL1	2.16236	0	0	43.3695
HAC49	MYRIP	2.80493	0	0	43.2628
HAC49	ADCY8	2.05482	0	0	43.1795
HAC49	TSPAN5	2.36045	0	0	43.1743
HAC50	PSD3	3.54155	0	0	49.0473
HAC50	SHISA6	3.98327	0	0	48.8452
HAC50	GLRA3	4.49575	0	0	47.7565
HAC50	NLGN1	3.39257	0	0	47.5498
HAC50	LUZP2	3.3624	0	0	47.3544
HAC50	PTPRD	2.84437	0	0	47.0136
HAC50	CACNA2D3	3.84968	0	0	46.8072
HAC50	ROBO2	3.17477	0	0	46.7223
HAC50	GRID2	3.15881	0	0	46.3805
HAC50	CHRM3	3.43758	0	0	44.7391
HAC50	LINC00535	4.17135	0	0	44.6165
HAC50	CSMD3	3.35118	0	0	44.2341
HAC50	DGKB	5.67853	0	0	44.0228
HAC50	GRM5	3.31734	0	0	42.6094
HAC50	ZNF521	3.06577	0	0	42.3537
HAC50	EBF1	3.88615	0	0	42.2477
HAC50	EPHA3	4.15526	0	0	40.9483
HAC50	KCNMB2	4.31363	0	0	40.5608
HAC50	PTPRR	2.54794	0	0	39.9456
HAC50	MMP16	2.84818	0	0	39.7279
HAC51	SORBS2	4.00636	0	0	49.2722
HAC51	TMEM132D	4.92536	0	0	48.9333
HAC51	MYO16	6.04099	0	0	47.2764
HAC51	CNTNAP5	3.99553	0	0	46.6407
HAC51	ESRRG	3.22621	0	0	46.1324
HAC51	TNR	4.43705	0	0	45.3452
HAC51	ASTN2	2.84991	0	0	45.3198
HAC51	CDH20	4.1107	0	0	45.0219
HAC51	CSGALNACT1	4.00012	0	0	44.1676
HAC51	RGS6	3.59329	0	0	42.8838
HAC51	GRIK1	4.16334	0	0	42.8675
HAC51	PATJ	2.45909	0	0	42.8328
HAC51	KCND2	3.79831	0	0	42.8077
HAC51	SLIT2	3.01015	0	0	41.1482
HAC51	ENOX1	2.51159	0	0	41.0859
HAC51	NWD2	3.32009	0	0	40.2939
HAC51	ADARB2	3.53205	0	0	40.2858
HAC51	MOB3B	3.77038	0	0	40.2852
HAC51	DSCAM	2.56938	0	0	39.9892
HAC51	KCNN2	2.8512	0	0	39.7668
HAC52	FRAS1	4.54305	0	0	45.9071
HAC52	CHST9	4.31108	0	0	44.8507
HAC52	SNTG1	2.91459	0	0	42.198
HAC52	PPFIBP1	3.14115	0	0	42.0374
HAC52	AQP4-AS1	3.74922	0	0	41.9968
HAC52	LINGO2	3.08471	0	0	41.147
HAC52	GULP1	3.58833	0	0	41.1275
HAC52	PCDH7	3.1422	0	0	40.0309
HAC52	SORBS2	2.77249	0	0	39.7012
HAC52	PEX5L	3.3146	0	0	39.4971
HAC52	SCN1A	3.02849	0	0	39.2717
HAC52	TSHZ2	3.42353	0	0	38.7036
HAC52	ADARB2	3.36493	0	0	38.5425
HAC52	AC068587.4	2.39212	0	0	38.5334
HAC52	TENM3	2.80612	0	0	38.3783
HAC52	AL109930.1	3.14078	0	0	37.8081
HAC52	PCSK2	2.7607	2.19559e-306	1.29152e-303	37.4154
HAC52	CPNE5	2.89013	6.90668e-300	3.83704e-297	37.0137
HAC52	KAZN	2.72196	4.94881e-297	2.60464e-294	36.8357
HAC52	MAF	3.53128	1.31477e-291	6.2608e-289	36.4953
HAC53	RNF220	5.31109	0	0	39.5722
HAC53	NRG1	2.9892	3.06579e-276	1.53289e-272	35.5133
HAC53	PCDH11X	4.29653	9.87481e-267	3.2916e-263	34.8919
HAC53	NCAM2	3.93109	1.28253e-264	3.20632e-261	34.7522
HAC53	DACH2	3.32896	9.28291e-255	1.85658e-251	34.0933
HAC53	CTNNA2	2.18574	3.34544e-239	5.57573e-236	33.0268
HAC53	RBFOX3	2.53113	5.33817e-215	7.62596e-212	31.2957
HAC53	PDZRN4	4.80746	1.36213e-201	1.70266e-198	30.2943
HAC53	ASIC2	2.03678	8.09294e-188	8.99215e-185	29.2299
HAC53	DLGAP2	3.24433	3.63641e-184	3.63641e-181	28.9411
HAC53	KLHL29	2.38294	1.16701e-178	1.06092e-175	28.5001
HAC53	TMEM108	2.57121	4.62694e-177	3.85578e-174	28.3709
HAC53	FRMD4A	1.5285	2.02965e-175	1.56127e-172	28.2375
HAC53	LRP1B	2.59336	5.76312e-171	4.11651e-168	27.8724
HAC53	L3MBTL4	3.39778	3.83576e-170	2.55717e-167	27.8044
HAC53	ZNF536	2.18891	3.12433e-164	1.95271e-161	27.3112
HAC53	PTPRM	2.54469	8.15037e-157	4.79434e-154	26.6795
HAC53	PLCXD3	4.84748	1.51685e-143	8.42696e-141	25.5103
HAC53	RMST	3.47256	3.36889e-142	1.7731e-139	25.3886
HAC53	TENM3	2.30983	6.10485e-141	3.05242e-138	25.2744
HAC54	FSTL5	4.3872	0	0	38.5819
HAC54	CA10	4.18023	0	0	38.4563
HAC54	SAMSN1	6.49399	4.89442e-254	1.63147e-250	34.0445
HAC54	IQCJ-SCHIP1	3.40035	1.23888e-234	3.09719e-231	32.7071
HAC54	NETO1	6.64942	1.22796e-232	2.45593e-229	32.5664
HAC54	ZNF385B	3.3267	1.43953e-228	2.39922e-225	32.2777
HAC54	FMN1	2.68496	3.41559e-211	4.87942e-208	31.0147
HAC54	OTX2-AS1	6.00981	4.33839e-208	5.42298e-205	30.7836
HAC54	GABRA5	4.46919	2.51322e-188	2.79246e-185	29.2698
HAC54	SV2B	2.75835	1.30353e-183	1.30353e-180	28.897
HAC54	DOK6	1.98774	2.97755e-180	2.70686e-177	28.6284
HAC54	NRXN3	0.754459	7.18317e-178	5.98598e-175	28.4364
HAC54	LRRC7	2.55296	2.54011e-175	1.95393e-172	28.2295
HAC54	NTNG1	2.82373	5.81261e-175	4.15186e-172	28.2002
HAC54	CACNA2D1	3.054	8.63822e-163	5.75881e-160	27.1895
HAC54	MCC	3.539	4.71761e-161	2.9485e-158	27.0422
HAC54	TCF4	2.24768	2.20004e-156	1.29414e-153	26.6423
HAC54	NXPH2	2.76607	1.22314e-155	6.79521e-153	26.5779
HAC54	FAM135B	3.20282	4.94702e-146	2.6037e-143	25.7334
HAC54	ADGRL2	3.37062	3.73595e-145	1.86797e-142	25.6548
HAC55	AL589740.1	5.18255	0	0	38.5404
HAC55	PKN2-AS1	6.37064	0	0	38.381
HAC55	RMST	4.32867	0	0	38.2296
HAC55	LAMA3	3.66411	1.4271e-240	3.56775e-237	33.1221
HAC55	CDH13	3.89664	1.68971e-235	3.37943e-232	32.7679
HAC55	KCNB2	2.68079	1.38121e-209	2.30202e-206	30.8953
HAC55	PTPRM	2.57785	6.43869e-201	9.19813e-198	30.2431
HAC55	TSHZ1	3.93752	1.53321e-197	1.91651e-194	29.9851
HAC55	EPHA7	2.57058	2.29685e-197	2.55206e-194	29.9717
HAC55	LMO4	2.4657	9.05132e-195	9.05132e-192	29.7718
HAC55	GAD1	2.09022	7.16959e-194	6.51781e-191	29.7023
HAC55	SPOCK3	2.07032	1.8544e-189	1.42646e-186	29.3586
HAC55	RPH3A	2.8795	1.04885e-177	7.49175e-175	28.4231
HAC55	CNTN4	2.05631	4.36243e-177	2.90829e-174	28.3729
HAC55	GRM5	2.57247	6.07072e-174	3.7942e-171	28.117
HAC55	FRMPD4	3.42574	8.44005e-173	4.96474e-170	28.0234
HAC55	PDZD2	1.85083	3.87649e-171	2.1536e-168	27.8866
HAC55	ESRRG	2.16146	7.35631e-169	3.87174e-166	27.6981
HAC55	GABRG1	2.62151	3.28999e-165	1.645e-162	27.3934
HAC55	SEMA6D	3.01044	1.21266e-162	5.77456e-160	27.1771
HAC56	FSTL5	3.93077	4.44029e-250	4.44029e-246	33.776
HAC56	ZNF385B	3.38242	5.7109e-223	2.85545e-219	31.8762
HAC56	SAMSN1	6.22957	4.14424e-207	1.38141e-203	30.7103
HAC56	PTPRM	2.75215	9.49047e-200	2.37262e-196	30.1541
HAC56	IQCJ-SCHIP1	3.25417	1.085e-196	2.17e-193	29.9199
HAC56	CA10	3.2105	1.15054e-183	1.91757e-180	28.9013
HAC56	KLF3-AS1	2.73294	8.21193e-172	1.17313e-168	27.9421
HAC56	SLC1A2	2.38247	6.58935e-162	8.23668e-159	27.1148
HAC56	DOK6	1.90421	9.54148e-159	1.00604e-155	26.8454
HAC56	NETO1	6.12732	1.00604e-158	1.00604e-155	26.8434
HAC56	OTX2-AS1	5.66196	8.11815e-149	7.38014e-146	25.981
HAC56	THSD7A	1.95627	2.06238e-140	1.71865e-137	25.2263
HAC56	ADGRL2	3.21206	1.52502e-136	1.17309e-133	24.8712
HAC56	FMN1	2.29513	2.90056e-136	2.07183e-133	24.8454
HAC56	IGSF21	3.99747	2.33685e-128	1.5579e-125	24.1028
HAC56	SPOCK1	2.00736	9.09553e-123	5.68471e-120	23.5637
HAC56	CDH20	2.76851	6.75274e-121	3.9722e-118	23.3805
HAC56	KLHL5	1.53995	9.63589e-121	5.35327e-118	23.3653
HAC56	NEBL	1.46513	6.59375e-119	3.47039e-116	23.1841
HAC56	SPHKAP	1.9331	9.06809e-117	4.53405e-114	22.9711
HAC57	ASIC2	3.28424	1.02487e-306	1.02487e-302	37.4357
HAC57	RNF220	5.8342	1.36076e-305	6.80379e-302	37.3666
HAC57	CAMK1D	3.02352	1.69541e-292	5.65137e-289	36.5514
HAC57	AC073114.1	5.38609	4.73502e-282	1.18376e-278	35.8878
HAC57	XYLT1	3.19999	1.60437e-270	3.20874e-267	35.1408
HAC57	TFAP2B	2.69515	8.08907e-260	1.34818e-256	34.433
HAC57	FRMD4A	2.14119	3.31208e-247	4.73154e-244	33.5798
HAC57	SRRM4	2.37922	3.04325e-246	3.80407e-243	33.5137
HAC57	DSCAM	2.90489	1.5857e-245	1.76189e-242	33.4645
HAC57	LRRC4C	4.25074	1.75054e-238	1.75054e-235	32.9767
HAC57	DLGAP1	1.79965	2.00463e-227	1.82239e-224	32.196
HAC57	CACNA1B	2.33023	8.10848e-224	6.75707e-221	31.9373
HAC57	PRKCA	3.09504	5.65486e-223	4.34989e-220	31.8765
HAC57	TSPAN9	3.07381	1.89847e-222	1.35605e-219	31.8385
HAC57	SIPA1L3	2.1924	2.39503e-208	1.59669e-205	30.8029
HAC57	MYRIP	2.88714	1.36209e-204	8.51308e-202	30.5212
HAC57	NAV2	2.60058	6.20896e-203	3.65233e-200	30.396
HAC57	RASGRF1	2.55041	9.7818e-202	5.43434e-199	30.3052
HAC57	ACTN2	3.89253	4.75116e-190	2.50061e-187	29.4049
HAC57	PHACTR3	2.52402	8.89219e-186	4.44609e-183	29.0689
HAC58	LRRC4C	4.27777	1.14407e-214	1.14407e-210	31.2714
HAC58	CDH20	3.88376	5.63573e-214	2.81787e-210	31.2204
HAC58	FMN1	2.98176	3.61677e-210	1.20559e-206	30.9386
HAC58	OLFM3	2.84175	2.87499e-207	7.18748e-204	30.7222
HAC58	FILIP1L	3.3241	9.49414e-205	1.89883e-201	30.533
HAC58	ACTN2	3.45839	5.80766e-182	9.67943e-179	28.7654
HAC58	HDC	3.31197	1.54236e-177	2.20337e-174	28.4095
HAC58	THSD4	3.13135	3.0714e-176	3.83925e-173	28.3042
HAC58	FSTL5	3.48308	2.36179e-168	2.62421e-165	27.656
HAC58	VWC2	2.52903	4.37227e-166	4.2458e-163	27.4668
HAC58	ZPBP	3.62687	4.67038e-166	4.2458e-163	27.4644
HAC58	RALYL	2.68649	3.1596e-164	2.633e-161	27.3108
HAC58	CMSS1	2.25498	7.2573e-164	5.58254e-161	27.2803
HAC58	ATP8B4	2.70946	8.64881e-161	5.96383e-158	27.0198
HAC58	AC073114.1	3.29795	8.94575e-161	5.96383e-158	27.0186
HAC58	SLC44A5	2.6824	3.68979e-159	2.30612e-156	26.8807
HAC58	DOCK2	3.02688	1.29726e-155	7.63093e-153	26.5757
HAC58	PDE1C	2.486	2.62561e-153	1.45867e-150	26.3754
HAC58	DCLK1	2.26853	4.84404e-152	2.5495e-149	26.2648
HAC58	LAMA3	2.8162	3.61878e-151	1.80939e-148	26.1882
HAC59	TRHDE	4.37575	1.41585e-240	1.41585e-236	33.1224
HAC59	COL24A1	5.77441	5.07202e-228	2.53601e-224	32.2387
HAC59	SYN3	3.65339	9.6388e-228	3.21293e-224	32.2188
HAC59	ROBO2	3.13176	5.04045e-217	1.17765e-213	31.4442
HAC59	LINC00535	3.90445	5.88823e-217	1.17765e-213	31.4392
HAC59	GRM7	2.92108	1.15121e-208	1.91869e-205	30.8267
HAC59	SHISA9	5.2313	3.43478e-207	4.90682e-204	30.7164
HAC59	RIT2	6.19136	1.17912e-197	1.4739e-194	29.9939
HAC59	CNTNAP4	2.91744	7.6663e-191	8.51811e-188	29.4668
HAC59	DOCK4	2.29476	1.55817e-190	1.55817e-187	29.4428
HAC59	CADPS2	6.76654	2.21402e-190	2.01274e-187	29.4308
HAC59	SERPINI1	3.20758	3.52131e-179	2.93443e-176	28.5421
HAC59	COBLL1	5.01913	2.87819e-178	2.21399e-175	28.4685
HAC59	KCNH5	2.28185	1.01364e-172	7.24027e-170	28.0168
HAC59	TRPM3	2.48519	2.9118e-171	1.9412e-168	27.8969
HAC59	RPS6KA2	2.35599	4.16894e-169	2.60559e-166	27.7186
HAC59	PRR16	3.26259	2.83225e-163	1.66603e-160	27.2305
HAC59	DPP10	3.46707	3.91967e-160	2.17759e-157	26.9639
HAC59	BNC2	4.17236	1.24348e-156	6.54464e-154	26.6636
HAC59	DAB1	2.21676	8.46012e-152	4.23006e-149	26.2436
HAC60	ELAVL2	5.39649	3.67496e-262	3.67496e-258	34.5892
HAC60	BCL11B	8.04125	4.20274e-247	2.10137e-243	33.5727
HAC60	NCAM2	4.67899	2.42375e-245	8.07917e-242	33.4518
HAC60	GALNTL6	5.54697	1.84461e-242	4.61152e-239	33.253
HAC60	DCC	3.38577	2.04765e-239	4.09531e-236	33.0417
HAC60	DPP10	4.65603	1.81043e-234	3.01739e-231	32.6955
HAC60	NKAIN3	5.79153	1.3837e-220	1.97672e-217	31.7037
HAC60	SV2C	4.81217	9.57913e-214	1.19739e-210	31.2034
HAC60	AL445623.2	5.86777	1.05982e-211	1.17757e-208	31.0524
HAC60	DMD	3.11286	6.26926e-202	6.26926e-199	30.3199
HAC60	NOS1	4.97054	1.32513e-201	1.20467e-198	30.2952
HAC60	STXBP6	3.69992	3.45744e-192	2.65957e-189	29.5717
HAC60	RMST	3.8055	6.79126e-189	4.8509e-186	29.3144
HAC60	CARMIL1	3.12102	3.94301e-186	2.62868e-183	29.0968
HAC60	GALNT17	2.84501	7.34373e-186	4.58983e-183	29.0754
HAC60	FRMPD4	3.57374	2.34776e-185	1.38104e-182	29.0355
HAC60	GRM3	2.86126	2.022e-180	1.12333e-177	28.6419
HAC60	PDZRN3	2.92586	2.22096e-174	1.16892e-171	28.1527
HAC60	CNTNAP5	2.97119	5.75556e-170	2.87778e-167	27.7898
HAC60	BMPER	3.53417	9.06571e-166	4.31701e-163	27.4403
HAC61	TF	5.53655	4.77211e-242	4.77211e-238	33.2245
HAC61	WIF1	5.68692	3.15847e-220	1.57923e-216	31.6776
HAC61	TRDN	6.85817	6.49652e-168	2.16551e-164	27.6195
HAC61	HKDC1	9.37981	1.02129e-160	2.55323e-157	27.0137
HAC61	FOXP2	4.89407	1.07681e-159	2.15361e-156	26.9264
HAC61	RLBP1	5.83005	9.25197e-158	1.542e-154	26.7608
HAC61	GLUL	2.57765	1.39001e-155	1.98573e-152	26.5731
HAC61	FRZB	4.4674	1.38661e-152	1.73327e-149	26.3123
HAC61	SLC1A3	3.74267	4.90163e-145	5.44625e-142	25.6442
HAC61	CTNNA2	2.25076	3.49833e-141	3.49833e-138	25.2964
HAC61	HES1	5.77112	2.84257e-129	2.58416e-126	24.1899
HAC61	PIP5K1B	4.22613	5.12669e-128	4.27224e-125	24.0702
HAC61	MIR99AHG	2.68735	2.71085e-127	2.08527e-124	24.0011
HAC61	NFIB	2.88608	3.84932e-126	2.74952e-123	23.8905
HAC61	SORBS2	2.3957	2.19249e-123	1.46166e-120	23.6238
HAC61	AKAP12	2.82484	9.0407e-123	5.65044e-120	23.5639
HAC61	GPM6B	2.54539	1.33148e-120	7.83222e-118	23.3515
HAC61	CRB1	2.57848	3.4847e-120	1.93595e-117	23.3103
HAC61	CDH23	5.23174	4.37226e-119	2.30119e-116	23.2017
HAC61	CLU	2.55016	1.77048e-118	8.85239e-116	23.1415
HAC62	SLC12A7	4.00539	1.63477e-199	1.63477e-195	30.136
HAC62	FSTL5	4.17556	2.17694e-198	1.08847e-194	30.0501
HAC62	AC073050.1	3.36836	1.1862e-187	3.95398e-184	29.2168
HAC62	NFIA	4.21874	2.26829e-187	5.67072e-184	29.1946
HAC62	SDK1	3.51324	1.74192e-185	3.48384e-182	29.0457
HAC62	KCNMA1	2.39601	4.37713e-183	7.29522e-180	28.8551
HAC62	DSCAML1	2.95474	1.16005e-180	1.65722e-177	28.6613
HAC62	CDHR3	3.73834	1.41763e-179	1.77203e-176	28.5739
HAC62	NFIA-AS2	3.89221	2.26142e-176	2.51269e-173	28.315
HAC62	GLCE	3.33307	1.32833e-175	1.32833e-172	28.2524
HAC62	TLL1	3.39245	1.91439e-174	1.74035e-171	28.158
HAC62	CADM1	2.38872	2.20238e-172	1.83532e-169	27.9891
HAC62	DRD2	3.57268	1.37905e-171	1.06081e-168	27.9236
HAC62	IQCJ-SCHIP1	3.50029	1.00767e-170	7.19766e-168	27.8524
HAC62	SYNDIG1	2.96058	6.69883e-166	4.46589e-163	27.4513
HAC62	CLMN	3.44852	1.26275e-165	7.89216e-163	27.4283
HAC62	DOK6	2.27619	5.23231e-163	3.07783e-160	27.2079
HAC62	PLCL1	2.86246	4.29288e-162	2.38494e-159	27.1306
HAC62	ST6GALNAC5	2.91406	8.45724e-162	4.45118e-159	27.1056
HAC62	SAMSN1	6.20618	1.2984e-158	6.49201e-156	26.834
HAC63	ADARB2	4.73431	1.37134e-237	1.37134e-233	32.9143
HAC63	ADAMTS9-AS2	5.69353	3.59717e-237	1.79859e-233	32.885
HAC63	PRKCB	2.63186	1.10599e-229	3.68663e-226	32.357
HAC63	CDH6	5.20992	2.15782e-217	5.39455e-214	31.4711
HAC63	GRM7	3.35032	4.48184e-215	8.96367e-212	31.3013
HAC63	KCNQ5	4.34197	1.5383e-202	2.56383e-199	30.3661
HAC63	ADRA1A	4.85241	2.2146e-197	3.16372e-194	29.9729
HAC63	GRIK1	4.68628	5.6258e-192	7.03225e-189	29.5552
HAC63	ROBO2	3.12547	1.32289e-191	1.46988e-188	29.5263
HAC63	PCDH9	3.08276	1.07942e-177	1.07942e-174	28.4221
HAC63	NLGN1	3.02947	4.73121e-172	4.3011e-169	27.9619
HAC63	ROBO1	2.90649	9.81897e-170	8.18248e-167	27.7706
HAC63	DCC	2.85847	8.44115e-165	6.49319e-162	27.359
HAC63	ASIC2	2.46665	2.07434e-160	1.48167e-157	26.9875
HAC63	ERBB4	3.72738	2.02575e-158	1.3505e-155	26.8174
HAC63	FRMD3	3.29375	4.9732e-152	3.10825e-149	26.2638
HAC63	AC064875.1	4.20655	1.73466e-151	1.02039e-148	26.2163
HAC63	SDC2	5.48141	3.56325e-150	1.97958e-147	26.1009
HAC63	PTPRG	2.22118	2.39897e-146	1.26262e-143	25.7615
HAC63	SLIT2	2.76925	5.80229e-139	2.90115e-136	25.0939
HAC64	PCDH15	4.03913	2.3115e-193	2.3115e-189	29.6629
HAC64	FMN1	3.32726	1.67839e-192	8.39197e-189	29.5961
HAC64	LINC01933	4.00859	6.84112e-184	2.28037e-180	28.9192
HAC64	SEMA6D	3.64544	2.6561e-174	6.64024e-171	28.1463
HAC64	MED12L	2.93191	1.72079e-168	3.44157e-165	27.6675
HAC64	SH3RF3	3.16916	2.29669e-163	3.82781e-160	27.2381
HAC64	SPRY4-AS1	3.65551	5.72237e-160	8.17482e-157	26.9499
HAC64	CNTNAP4	2.68476	3.59361e-157	3.9929e-154	26.7101
HAC64	KHDRBS3	2.87626	1.08189e-150	1.08189e-147	26.1464
HAC64	SLIT2	2.94876	2.7678e-150	2.51618e-147	26.1105
HAC64	CACHD1	3.2763	1.40503e-146	1.17085e-143	25.7822
HAC64	CCDC85A	2.46882	1.24001e-145	9.53857e-143	25.6977
HAC64	P2RY14	2.9065	1.68032e-143	1.20023e-140	25.5063
HAC64	ADGRL2	3.55493	1.48512e-142	9.90077e-140	25.4208
HAC64	FSTL4	2.23116	4.2204e-141	2.63775e-138	25.289
HAC64	UNC5D	2.72648	1.46891e-139	8.64067e-137	25.1485
HAC64	HCN1	2.2677	1.92996e-137	1.0722e-134	24.954
HAC64	CALN1	2.67044	1.94143e-135	1.02181e-132	24.7689
HAC64	KCNT2	3.94431	3.80055e-133	1.90027e-130	24.5553
HAC64	ZNF804B	3.95235	5.2337e-133	2.49224e-130	24.5422
HAC65	ZNF385B	3.84366	7.06213e-181	7.06213e-177	28.6786
HAC65	FSTL5	4.06335	9.63811e-176	4.81905e-172	28.2638
HAC65	CA10	3.56431	1.68914e-154	5.63046e-151	26.4791
HAC65	CADM1	2.38726	4.59825e-150	1.14956e-146	26.0911
HAC65	PLXDC1	3.02962	6.72929e-144	1.34586e-140	25.542
HAC65	PEX5L	3.32463	6.78938e-137	1.13156e-133	24.9037
HAC65	SAMSN1	6.03842	8.36997e-134	1.19571e-130	24.6167
HAC65	CUX2	2.62802	1.0966e-131	1.37075e-128	24.4182
HAC65	FMN1	2.64671	1.64971e-126	1.83302e-123	23.9258
HAC65	AC105411.1	3.73183	1.45485e-125	1.45485e-122	23.8348
HAC65	LINC01170	3.34835	5.121e-124	4.65545e-121	23.6852
HAC65	PCDH7	2.91069	1.84817e-123	1.54014e-120	23.6311
HAC65	INPP4B	2.68288	7.37584e-123	5.67372e-120	23.5725
HAC65	CPNE5	2.65044	9.93146e-122	7.0939e-119	23.4622
HAC65	SLC4A4	2.69138	2.41723e-117	1.61149e-114	23.0285
HAC65	KAZN	2.62619	4.13521e-113	2.58451e-110	22.6021
HAC65	MAF	3.15011	2.43354e-112	1.43149e-109	22.5237
HAC65	DOK6	1.91389	1.59506e-104	8.86143e-102	21.7116
HAC65	NETO1	5.8414	2.47583e-104	1.30307e-101	21.6914
HAC65	GALNT17	2.23167	2.16064e-102	1.07855e-99	21.4848
HAC66	PRKG1	4.39796	1.53643e-166	1.53643e-162	27.5048
HAC66	CARTPT	5.08922	4.15829e-159	1.69479e-155	26.8763
HAC66	VSTM2B	4.02955	5.08438e-159	1.69479e-155	26.8688
HAC66	NFIA	4.78765	2.0958e-150	5.23949e-147	26.1212
HAC66	GPC6	4.22774	1.72981e-149	3.45963e-146	26.0404
HAC66	ZNF385B	3.86377	8.09744e-149	1.34957e-145	25.9811
HAC66	RMST	3.86718	7.09083e-143	1.01298e-139	25.4498
HAC66	PTPRM	3.51279	2.15781e-142	2.69726e-139	25.4061
HAC66	SV2C	4.65684	3.72707e-142	4.14118e-139	25.3846
HAC66	SCG2	4.41541	8.81605e-142	8.81605e-139	25.3508
HAC66	LRRTM4	3.93714	1.03055e-139	8.61197e-137	25.1625
HAC66	MAGI3	2.24336	1.03344e-139	8.61197e-137	25.1624
HAC66	KCNB2	3.45313	7.18622e-139	5.52786e-136	25.0854
HAC66	PRKCB	1.97231	1.41459e-135	1.01042e-132	24.7816
HAC66	GRM5	3.31205	3.71839e-134	2.47893e-131	24.6496
HAC66	SPOCK3	2.55167	5.14483e-134	3.21552e-131	24.6364
HAC66	AC099792.1	3.82406	2.89005e-132	1.70003e-129	24.4726
HAC66	PBX3	3.53508	2.76721e-131	1.53734e-128	24.3803
HAC66	SEMA6D	3.7624	8.13989e-131	4.28415e-128	24.3361
HAC66	ARHGAP20	3.24716	2.44485e-128	1.22243e-125	24.1009
HAC67	RBPMS	6.08639	2.05077e-173	2.05077e-169	28.0737
HAC67	IQCJ-SCHIP1	5.51706	1.49269e-172	7.46345e-169	28.003
HAC67	MIAT	4.23866	1.05714e-158	2.64284e-155	26.8416
HAC67	EBF1	4.65679	8.87458e-151	1.77492e-147	26.154
HAC67	KAZN	3.72587	2.30681e-150	3.84469e-147	26.1175
HAC67	RBM20	6.96603	1.33256e-148	1.90366e-145	25.962
HAC67	NELL2	4.4913	3.59728e-145	4.4966e-142	25.6563
HAC67	KCNH8	5.70921	1.06075e-140	1.17861e-137	25.2526
HAC67	ROBO2	3.2813	1.21169e-140	1.21169e-137	25.2473
HAC67	RGS6	4.07924	3.04075e-140	2.76432e-137	25.2109
HAC67	KCTD16	3.27294	1.57667e-139	1.31389e-136	25.1457
HAC67	AC120193.1	5.57047	8.85106e-139	6.80851e-136	25.0771
HAC67	SRGAP1	3.51702	2.15039e-128	1.536e-125	24.1062
HAC67	SATB2	5.00786	7.33781e-122	4.89187e-119	23.475
HAC67	FGF12	2.35135	5.52838e-120	3.45524e-117	23.2905
HAC67	CSMD3	3.29688	6.72249e-119	3.9544e-116	23.1832
HAC67	FMN1	3.11694	5.04958e-118	2.80532e-115	23.0963
HAC67	CHSY3	5.1499	1.13511e-117	5.97429e-115	23.0612
HAC67	EBF3	4.75134	9.57115e-115	4.78557e-112	22.7678
HAC67	MAST4	3.17656	1.37574e-114	6.55112e-112	22.7519
HAC68	KLHL29	3.6869	1.00907e-114	1.00907e-110	22.7654
HAC68	FRMD4A	2.09062	2.35712e-98	9.72821e-95	21.0486
HAC68	KAZN	3.31766	2.91846e-98	9.72821e-95	21.0384
HAC68	ST6GALNAC5	3.47388	9.19033e-95	2.29758e-91	20.6529
HAC68	RAB31	4.57824	2.09306e-85	4.18613e-82	19.5846
HAC68	PLCXD3	5.38557	3.58066e-84	5.96777e-81	19.4394
HAC68	RBFOX3	2.46597	1.12951e-81	1.61358e-78	19.142
HAC68	SEMA5B	6.33552	2.13785e-81	2.49977e-78	19.1087
HAC68	CACNA1B	2.09372	2.2498e-81	2.49977e-78	19.106
HAC68	SYN3	2.93368	2.36271e-80	2.36271e-77	18.9829
HAC68	ITPR1	3.35724	6.05568e-80	5.50517e-77	18.9334
HAC68	SORBS1	2.4242	9.27156e-79	7.7263e-76	18.7891
HAC68	DLGAP2	2.85363	1.81971e-78	1.39978e-75	18.7533
HAC68	PDZRN4	4.46617	3.0024e-77	2.14457e-74	18.6036
HAC68	KCNQ1OT1	2.64117	3.06603e-75	2.04402e-72	18.354
HAC68	CLSTN2	4.00252	4.80997e-75	3.00623e-72	18.3295
HAC68	TSHZ2	3.32824	9.91013e-74	5.82949e-71	18.1642
HAC68	AGBL4	2.48676	5.48406e-70	3.0467e-67	17.6849
HAC68	GRIK4	3.73989	1.85706e-68	9.77401e-66	17.4852
HAC68	CNTN3	2.98739	9.80356e-68	4.90178e-65	17.3901
HAC69	ADARB2	4.88271	3.07032e-120	3.07032e-116	23.3157
HAC69	KAZN	3.63841	1.94971e-102	9.74854e-99	21.4896
HAC69	PPFIBP1	3.50843	3.90785e-97	1.30262e-93	20.915
HAC69	FRAS1	4.23058	5.47413e-80	1.36853e-76	18.9387
HAC69	CACNA1B	2.12084	1.49935e-74	2.9987e-71	18.2676
HAC69	CUX2	2.79574	5.90525e-73	9.84208e-70	18.066
HAC69	TENM3	2.80571	4.80037e-70	6.85767e-67	17.6924
HAC69	CNTN5	2.99326	1.99012e-67	2.48765e-64	17.3495
HAC69	PTPRG	2.10652	3.13581e-65	3.48423e-62	17.0563
HAC69	GALNTL6	4.51707	2.93592e-64	2.93592e-61	16.9252
HAC69	LDLRAD4	2.79701	7.40629e-63	6.73299e-60	16.734
HAC69	NAV2	2.21169	5.60522e-58	4.67102e-55	16.0512
HAC69	CPNE5	2.88311	3.2724e-57	2.33743e-54	15.9413
HAC69	CACNA1E	2.893	8.44316e-57	5.62878e-54	15.882
HAC69	AC068587.4	2.26662	2.34012e-54	1.37654e-51	15.5253
HAC69	GABBR2	2.22607	1.0863e-52	6.035e-50	15.2771
HAC69	XKR4	1.80492	1.29579e-52	6.81993e-50	15.2656
HAC69	ANKRD30BL	1.87709	2.10673e-50	1.05336e-47	14.9299
HAC69	RYR2	1.79957	5.72089e-49	2.72423e-46	14.7081
HAC69	ZFHX3	2.37189	8.52828e-49	3.87649e-46	14.681
HAC70	ADAMTS9-AS2	5.9142	4.29888e-122	4.29888e-118	23.4978
HAC70	CSMD3	4.05791	5.40195e-104	2.70097e-100	21.6554
HAC70	PCDH9	3.29476	1.26783e-98	4.22611e-95	21.0779
HAC70	KIRREL3	3.20183	5.7844e-85	1.4461e-81	19.5327
HAC70	LRP2	4.43772	4.45251e-79	8.90502e-76	18.828
HAC70	POU6F2	2.95593	6.70471e-78	1.11745e-74	18.6838
HAC70	SLIT2	2.74671	1.64712e-71	2.0589e-68	17.8814
HAC70	GPC6	3.41777	3.82314e-70	4.24794e-67	17.7052
HAC70	PRICKLE2	2.12626	9.37228e-68	9.37228e-65	17.3927
HAC70	LINC01541	6.29732	1.881e-63	1.44692e-60	16.8154
HAC70	ZFHX3	2.86137	5.35248e-62	3.56832e-59	16.6158
HAC70	TBX2	2.97928	2.83466e-60	1.77166e-57	16.3761
HAC70	DCDC1	2.67602	2.30303e-59	1.35472e-56	16.2481
HAC70	ADARB2	2.93243	1.72279e-56	9.06729e-54	15.8372
HAC70	GRM7	2.15731	1.95461e-56	9.77307e-54	15.8293
HAC70	UNC5D	2.39024	3.74077e-56	1.71694e-53	15.7884
HAC70	CLNK	3.59087	3.77727e-56	1.71694e-53	15.7878
HAC70	PID1	2.43364	1.82734e-55	7.94496e-53	15.688
HAC70	PCDH9-AS2	2.59108	3.65161e-54	1.52151e-51	15.4967
HAC70	SPOCK3	1.90017	1.99224e-53	7.66247e-51	15.3873
HAC71	CCDC39	6.37156	1.23209e-95	1.23209e-91	20.7498
HAC71	SLC24A4	5.4878	6.1845e-95	3.09225e-91	20.672
HAC71	SLC5A7	5.28091	2.70916e-92	9.03052e-89	20.3764
HAC71	KIAA1217	4.00484	6.64835e-91	1.66209e-87	20.2191
HAC71	ZNF385B	4.08832	1.33435e-89	2.6687e-86	20.0706
HAC71	FSTL5	4.4669	1.26751e-88	2.11251e-85	19.9584
HAC71	MAML2	4.0417	1.58716e-86	2.26738e-83	19.7155
HAC71	CACNA1B	2.46803	5.66899e-84	7.08624e-81	19.4158
HAC71	ADAMTS18	4.31342	1.9548e-83	2.172e-80	19.3522
HAC71	CA10	4.06978	6.91e-82	6.91e-79	19.1675
HAC71	SORCS2	3.35068	3.46789e-81	3.15263e-78	19.0834
HAC71	RBFOX1	3.8837	6.44917e-80	5.37431e-77	18.9301
HAC71	DOK5	2.93443	7.49895e-79	5.76842e-76	18.8004
HAC71	SLC35F4	3.79945	4.00712e-76	2.86223e-73	18.4642
HAC71	FAM49B	2.1378	1.38255e-75	9.21698e-73	18.3972
HAC71	RBMS3	3.53407	2.48189e-75	1.55118e-72	18.3655
HAC71	PAPPA2	3.67961	6.98847e-72	4.11086e-69	17.9291
HAC71	FLT1	4.95886	1.15962e-71	6.44233e-69	17.9009
HAC71	CACNA2D1	3.17711	1.10352e-69	5.80801e-67	17.6454
HAC71	SAMSN1	6.27318	9.69034e-69	4.76193e-66	17.5223
HAC72	MIR137HG	9.02218	3.97924e-91	3.97924e-87	20.2444
HAC72	DPYD	7.10602	1.90093e-89	9.50464e-86	20.053
HAC72	NCAM2	5.26233	1.59332e-87	5.31107e-84	19.8315
HAC72	PCDH11X	5.12815	2.96416e-84	7.41039e-81	19.4491
HAC72	KCND2	4.64096	4.36567e-83	8.73134e-80	19.3107
HAC72	CNTNAP5	4.50482	1.481e-82	2.46834e-79	19.2475
HAC72	THRB	3.86089	8.53709e-82	1.21958e-78	19.1565
HAC72	AC007953.2	7.82543	1.13612e-81	1.42015e-78	19.1417
HAC72	KLHL1	3.71098	5.60221e-80	6.22468e-77	18.9375
HAC72	GABRB1	4.3685	2.94806e-77	2.94806e-74	18.6046
HAC72	BRINP3	4.08761	9.60917e-76	8.73561e-73	18.4169
HAC72	SCN9A	4.38191	1.73083e-74	1.44235e-71	18.2598
HAC72	SORBS2	3.33988	2.17734e-74	1.67487e-71	18.2472
HAC72	ALCAM	5.12656	6.98681e-73	4.99058e-70	18.0567
HAC72	GPC5	4.43691	1.15953e-72	7.73021e-70	18.0287
HAC72	DPP10	4.12455	1.50632e-72	9.41449e-70	18.0142
HAC72	LINC00535	3.72691	2.0599e-72	1.2117e-69	17.9969
HAC72	DPYD-AS1	6.72697	3.61878e-71	2.01043e-68	17.8374
HAC72	KCNQ5	3.92756	1.91901e-70	9.87588e-68	17.744
HAC72	SEMA6D	3.75948	1.97518e-70	9.87588e-68	17.7423
HAC73	ZNF385B	4.20921	6.30198e-82	6.30198e-78	19.1723
HAC73	FSTL5	4.10171	1.8583e-74	9.29151e-71	18.2559
HAC73	LMF1	3.60489	2.03472e-73	6.78241e-70	18.1247
HAC73	DPP10	3.84875	2.0087e-69	5.02174e-66	17.6116
HAC73	PCDH11X	3.88674	1.99675e-66	3.9935e-63	17.2165
HAC73	CPAMD8	3.53863	5.13624e-64	8.56039e-61	16.8922
HAC73	GREB1L	2.85094	6.59651e-64	9.42359e-61	16.8774
HAC73	UTRN	3.15431	1.79375e-63	2.24218e-60	16.8183
HAC73	NPAS3	3.00404	5.38573e-63	5.98414e-60	16.753
HAC73	PDGFD	4.40526	6.77557e-63	6.77557e-60	16.7393
HAC73	AC009041.2	4.23513	9.78273e-59	8.89339e-56	16.1592
HAC73	SAMSN1	6.05478	2.46934e-57	2.05778e-54	15.9589
HAC73	CA10	3.36806	1.29655e-56	9.97344e-54	15.8551
HAC73	LINC00871	3.6437	4.292e-56	3.06572e-53	15.7797
HAC73	TENM3	2.83314	6.22049e-55	4.14699e-52	15.61
HAC73	ZFHX3	3.14985	2.93373e-54	1.83358e-51	15.5108
HAC73	CDH12	2.84212	5.97371e-54	3.51395e-51	15.465
HAC73	ZFHX4	2.67579	7.75479e-52	4.30821e-49	15.1485
HAC73	CADM1	2.17594	1.00662e-51	5.29798e-49	15.1313
HAC73	NTN1	4.01795	2.42155e-51	1.21078e-48	15.0734
HAC74	AC109466.1	5.07563	3.48534e-19	3.48534e-15	8.95218
HAC74	AC008415.1	4.38005	2.07884e-18	1.0119e-14	8.75293
HAC74	EBF3	5.15317	3.03571e-18	1.0119e-14	8.71011
HAC74	ROBO2	3.04117	4.51639e-18	1.1291e-14	8.66497
HAC74	SLC24A3	2.92087	1.21992e-16	2.43985e-13	8.28115
HAC74	TENM2	2.84578	2.36699e-16	3.94499e-13	8.20186
HAC74	MGAT4C	3.23712	3.0937e-16	4.41958e-13	8.16962
HAC74	GRIK2	2.53308	3.9077e-16	4.56435e-13	8.14139
HAC74	LUZP2	2.9247	4.10791e-16	4.56435e-13	8.13534
HAC74	ST18	3.54214	1.0773e-15	1.0773e-12	8.01772
HAC74	GPC6	3.55581	1.52337e-15	1.38488e-12	7.97504
HAC74	CDH18	2.48347	2.05189e-15	1.70991e-12	7.93817
HAC74	TMEM132D	3.46644	4.03123e-15	3.10094e-12	7.85395
HAC74	CTXND1	3.80734	1.65888e-14	1.18491e-11	7.67464
HAC74	EBF1	3.32507	1.93335e-14	1.2889e-11	7.65498
HAC74	PRDM13	3.65006	2.64809e-14	1.65506e-11	7.61445
HAC74	CACNA2D3	2.94021	3.79353e-14	2.23149e-11	7.56788
HAC74	GABRG3	3.07803	5.23531e-14	2.9085e-11	7.52591
HAC74	CNTN5	2.95306	5.9321e-14	3.00352e-11	7.50957
HAC74	NRXN1	1.7407	6.00705e-14	3.00352e-11	7.50793

## Sheet: AC_note
Note:
1. Known markers for AC cell types from human data
1.1 Reference: Yan et al. (2020). https://doi.org/10.1038/s41598-020-66092-9
1.2 25 AC cell types
Group	Marker	Cluster ID	note
GABAergic	GAD1 and GAD2		16 clusters
Glycinergic	SLC6A9		8 clusters
nGnG		C14	1 cluster
Both		C17	Glycinertic type, also express GAD2
Name	Marker	Cluster ID	note
VG3	SLC17A8		an excitatory type, is a Both type
SAC	SLC18A3
CAI/CAII	TH
AII	GJD2		mediate transmission of rod signals to RGCs
2. Known markers from mouse data
2.1 Reference: Yan et al. (2020). https://doi.org/10.1523/JNEUROSCI.0471-20.2020
2.2 63 AC cell types
Name	Marker	Cluster ID	note
SAC	Chat	C17
AII	Gjd2, Prox1, Dab1, Nfia, Dner	C3
SEG	Satb2, Ebf3, and Glyt1 (Slc6a9)	C4
VG3	VGlut3 (Slc17a8)	C13	Both
A17	Prkca (PKCα), Sdk1, Calb2−, Dab1−	C6
Cck		C10, C17, C18, C34
Vip		C22, C26, C47
Crh		C37
Penk		C35, C59, C63
2.3 GABA and glycine
Name	Marker	Cluster ID	note
GABAergic	Gad1 and Gad2		Gad1 and Gad2, GABA transporters Gat 1-3 (Slc6a1, Slc6a13, and Slc6a11) 43 clusters
glycinergic	Slc6a9		glycine transporters GlyT1 and GlyT2 (Slc6a9 and Slc6a5) 13 clusters
nGnG		C10, C24, C30, C36	4 nGnG
Both		C16, C53, C62
VG3	Slc17a8 and Slc6a9		VGlut3 and Glyt1, is of both excitatory glutamatergic and inhibitory glycinergic.
VG1	Slc17a7		Second glutamatergic AC, also express GABAergic markers
SAC	Chat	C17	Is a Acetylcholine.
CAI/CAII	TH, Ddc, Gja1, Chl1, Arhgdig	C25	a GABAergic type
CAI	TH, Ddc, Gja1	C45A	TH for CAI
CAII	Chl1 and Arhgdig	C25	low TH and Ddc. Chl1 for CAII.
nNOS	Nos1, Nos2, and Hmox2	C48, C52, C54	A gasotransmitters. Figure 5I.
PENK	Penk	C35, C59, C63
	Ppp1r17, Car3	C35	narrow-field AC, Glycinergic
	Sst, Gal	C63	wild-field AC, GABAergic
	none of the 4	C59	medium-field AC, GABAergic
nGnG		C24, C10, C30, C36
	Neurod6, Ebf3, Ppp1r17	C24	nGnG-1, negative for NFIX.
	Cntn6, Cck, Ebf3, Nfix, Prdm8	C10	nGnG-2, negative for GAD, GlyT1, PPP1R17, but positive for NFIX, EBF3
	Cntn5, Ppp1r17	C30	nGnG-3
	Gbx2, Lhx9	C36	nGnG-4, negative for GAD, GLYT1, but positive for LHX9.
	Lgr5		nGnG1-3 expressing Lgr5
3. Cross-mapping between 25 Sanes public labeling (scRNA-seq) and 74 snRNA-seq clusters
3.1 Reference: Yan et al. (2020). https://doi.org/10.1038/s41598-020-66092-9
3.2 Mapping matrix between 74 clusters and 25 public human labeling
				cluster	Unassigned	Gaba1	Gaba10	Gaba11	Gaba12	Gaba13	Gaba14	Gaba15	Gaba16	Gaba17	Gaba2	Gaba3	Gaba4	Gaba5	Gaba6	Gaba7	Gaba8	Gaba9	Gly1	Gly2	Gly3	Gly4	Gly5	Gly6	Gly7	Gly8	annotation
				HAC1	1	0	0	0	0	0	0	0	0	0	0	0	0	0	0	0	0	0	0	0	0	0	0	0	1999	0	100.0%Gly7
				HAC2	1	0	0	0	0	0	0	0	0	0	0	0	0	0	0	0	0	0	0	1999	0	0	0	0	0	0	100.0%Gly2
				HAC3	87	1913	0	0	0	0	0	0	0	0	0	0	0	0	0	0	0	0	0	0	0	0	0	0	0	0	95.7%Gaba1
				HAC4	0	0	0	0	0	0	0	0	0	0	0	0	0	0	0	0	2000	0	0	0	0	0	0	0	0	0	100.0%Gaba8
				HAC5	1	0	0	0	0	0	0	0	0	0	0	0	0	0	0	1999	0	0	0	0	0	0	0	0	0	0	100.0%Gaba7
				HAC6	0	0	0	0	0	0	0	0	0	0	0	0	0	0	0	0	0	0	0	0	0	2000	0	0	0	0	100.0%Gly4
				HAC7	0	0	0	0	0	0	0	0	0	0	0	0	0	0	0	0	0	2000	0	0	0	0	0	0	0	0	100.0%Gaba9
				HAC8	3	0	0	0	0	0	0	0	0	0	0	0	1997	0	0	0	0	0	0	0	0	0	0	0	0	0	99.9%Gaba4
				HAC9	12	1988	0	0	0	0	0	0	0	0	0	0	0	0	0	0	0	0	0	0	0	0	0	0	0	0	99.4%Gaba1
				HAC10	8	0	0	0	0	0	0	0	0	0	0	0	0	1992	0	0	0	0	0	0	0	0	0	0	0	0	99.6%Gaba5
				HAC11	5	0	0	0	0	0	0	0	0	0	0	0	0	0	0	1995	0	0	0	0	0	0	0	0	0	0	99.8%Gaba7
				HAC12	0	0	0	0	0	0	0	0	0	0	0	0	0	0	0	0	0	0	0	0	2000	0	0	0	0	0	100.0%Gly3
				HAC13	280	0	0	17	0	0	1703	0	0	0	0	0	0	0	0	0	0	0	0	0	0	0	0	0	0	0	85.2%Gaba14+14.0%Unassigned
				HAC14	1	0	0	0	0	0	0	0	0	0	0	0	0	0	0	0	0	0	1999	0	0	0	0	0	0	0	100.0%Gly1
				HAC15	0	0	0	0	0	0	0	0	0	0	0	0	0	0	0	0	0	0	0	0	0	0	0	0	2000	0	100.0%Gly7
				HAC16	204	0	34	0	0	0	0	0	0	0	0	0	0	0	0	1762	0	0	0	0	0	0	0	0	0	0	88.1%Gaba7+10.2%Unassigned
				HAC17	0	0	0	0	0	0	0	0	0	0	0	0	0	0	0	0	0	0	0	0	0	0	0	2000	0	0	100.0%Gly6
				HAC18	2	0	0	0	0	0	0	0	0	0	0	0	0	0	0	0	0	0	0	0	0	0	0	0	0	1998	99.9%Gly8
				HAC19	833	2	575	0	0	0	0	0	0	0	0	0	590	0	0	0	0	0	0	0	0	0	0	0	0	0	41.6%Unassigned+29.5%Gaba4+28.7%Gaba10
				HAC20	2	1	0	1997	0	0	0	0	0	0	0	0	0	0	0	0	0	0	0	0	0	0	0	0	0	0	99.9%Gaba11
				HAC21	1	0	0	0	0	0	0	0	0	0	0	1999	0	0	0	0	0	0	0	0	0	0	0	0	0	0	100.0%Gaba3
				HAC22	1014	0	774	0	212	0	0	0	0	0	0	0	0	0	0	0	0	0	0	0	0	0	0	0	0	0	50.7%Unassigned+38.7%Gaba10+10.6%Gaba12
				HAC23	69	0	0	0	1907	0	0	0	0	0	0	0	0	0	0	24	0	0	0	0	0	0	0	0	0	0	95.3%Gaba12
				HAC24	0	0	0	0	0	0	0	0	0	0	2000	0	0	0	0	0	0	0	0	0	0	0	0	0	0	0	100.0%Gaba2
				HAC25	1272	0	285	404	0	0	0	0	0	0	0	0	0	0	0	0	0	0	39	0	0	0	0	0	0	0	63.6%Unassigned+20.2%Gaba11+14.2%Gaba10
				HAC26	0	0	0	0	0	0	0	0	0	0	0	0	0	2000	0	0	0	0	0	0	0	0	0	0	0	0	100.0%Gaba5
				HAC27	24	0	0	0	0	0	0	0	0	0	0	0	1976	0	0	0	0	0	0	0	0	0	0	0	0	0	98.8%Gaba4
				HAC28	139	0	0	0	0	0	0	0	1851	0	0	0	0	0	0	0	0	10	0	0	0	0	0	0	0	0	92.5%Gaba16
				HAC29	435	0	0	1563	0	0	0	0	0	0	0	0	0	0	0	0	0	0	2	0	0	0	0	0	0	0	78.1%Gaba11+21.8%Unassigned
				HAC30	33	0	0	0	0	0	1	0	0	0	0	0	0	0	1966	0	0	0	0	0	0	0	0	0	0	0	98.3%Gaba6
				HAC31	62	0	0	0	0	0	0	0	0	0	0	0	0	0	0	0	0	1	0	0	0	1933	0	0	4	0	96.7%Gly4
				HAC32	40	0	2	0	0	0	0	0	0	0	0	0	1958	0	0	0	0	0	0	0	0	0	0	0	0	0	97.9%Gaba4
				HAC33	0	0	0	0	0	0	0	0	0	0	0	0	0	0	0	0	0	0	0	0	0	0	2000	0	0	0	100.0%Gly5
				HAC34	294	0	1575	0	6	0	0	0	0	0	0	0	0	0	0	125	0	0	0	0	0	0	0	0	0	0	78.8%Gaba10+14.7%Unassigned
				HAC35	1077	3	0	0	0	79	839	0	0	0	0	0	2	0	0	0	0	0	0	0	0	0	0	0	0	0	53.8%Unassigned+41.9%Gaba14
				HAC36	152	0	1847	0	0	0	0	0	0	0	0	0	0	0	0	1	0	0	0	0	0	0	0	0	0	0	92.3%Gaba10
				HAC37	1278	0	382	0	0	3	0	0	0	0	0	0	337	0	0	0	0	0	0	0	0	0	0	0	0	0	63.9%Unassigned+19.1%Gaba10+16.9%Gaba4
				HAC38	0	0	0	0	2000	0	0	0	0	0	0	0	0	0	0	0	0	0	0	0	0	0	0	0	0	0	100.0%Gaba12
				HAC39	4	0	0	0	0	1863	0	0	0	0	0	0	0	0	0	0	0	0	0	0	0	0	0	0	0	0	99.8%Gaba13
				HAC40	22	0	0	0	0	0	0	0	0	0	0	0	1717	0	0	0	0	0	0	0	0	0	0	0	0	0	98.7%Gaba4
				HAC41	4	0	0	0	0	0	0	0	0	0	0	0	0	0	0	0	0	0	0	0	0	0	1713	0	0	0	99.8%Gly5
				HAC42	460	3	0	0	0	0	0	0	0	1220	0	0	0	0	0	0	0	9	0	0	0	0	0	0	0	0	72.1%Gaba17+27.2%Unassigned
				HAC43	5	0	0	0	0	0	0	0	0	0	0	0	0	0	1501	0	0	0	0	0	0	0	0	0	0	0	99.7%Gaba6
				HAC44	0	0	0	0	0	1453	0	0	0	0	0	0	0	0	0	0	0	0	0	0	0	0	0	0	0	0	100.0%Gaba13
				HAC45	2	0	0	0	0	0	0	1440	0	0	0	0	0	0	0	0	0	0	0	0	0	0	0	0	0	0	99.9%Gaba15
				HAC46	861	0	0	0	0	27	492	0	0	0	0	0	0	0	0	0	0	0	0	0	0	0	0	0	0	0	62.4%Unassigned+35.7%Gaba14
				HAC47	143	0	0	0	0	1035	0	0	0	0	0	0	0	0	0	0	0	0	5	0	0	0	0	0	0	0	87.5%Gaba13+12.1%Unassigned
				HAC48	682	0	0	0	0	436	6	0	0	0	0	0	0	0	36	0	0	0	0	0	0	0	0	0	0	0	58.8%Unassigned+37.6%Gaba13
				HAC49	27	1082	0	0	0	0	0	0	0	0	0	0	0	0	0	0	0	0	0	0	0	0	0	0	0	0	97.6%Gaba1
				HAC50	18	0	0	0	0	0	0	0	0	0	0	0	0	0	0	0	0	0	994	0	0	0	0	0	0	0	98.2%Gly1
				HAC51	57	0	0	7	0	0	0	0	0	0	0	0	0	0	833	0	0	0	2	0	0	0	0	0	0	0	92.7%Gaba6
				HAC52	147	2	0	0	0	0	0	0	0	0	0	0	719	0	0	26	0	0	0	0	0	0	0	0	0	0	80.4%Gaba4+16.4%Unassigned
				HAC53	201	491	0	0	0	0	0	1	0	0	0	0	0	0	0	0	0	4	0	0	0	0	0	0	0	0	70.4%Gaba1+28.8%Unassigned
				HAC54	102	0	0	0	0	0	0	0	0	0	0	0	0	0	0	0	0	0	1	0	0	561	0	0	6	0	83.7%Gly4+15.2%Unassigned
				HAC55	328	0	0	1	0	0	0	0	0	0	36	289	8	0	0	0	0	0	0	0	0	0	0	0	0	0	49.5%Unassigned+43.7%Gaba3
				HAC56	325	0	0	0	0	0	0	0	0	0	60	0	0	0	0	0	159	20	2	1	0	2	0	0	0	0	57.1%Unassigned+27.9%Gaba8+10.5%Gaba2
				HAC57	7	506	0	0	0	0	0	0	0	0	0	0	0	0	0	0	0	0	0	0	0	0	0	0	0	0	98.6%Gaba1
				HAC58	114	356	0	0	0	0	0	0	0	0	0	0	0	0	0	0	0	0	0	0	0	0	0	0	0	0	75.7%Gaba1+24.3%Unassigned
				HAC59	299	0	0	0	8	0	0	0	0	0	0	0	0	0	0	0	0	0	149	0	0	2	0	0	0	0	65.3%Unassigned+32.5%Gly1
				HAC60	150	0	1	0	0	299	0	0	0	0	0	0	0	0	3	0	0	0	0	0	0	0	0	0	0	0	66.0%Gaba13+33.1%Unassigned
				HAC61	273	0	0	0	0	0	0	0	0	0	0	0	0	3	0	5	7	0	0	136	0	0	0	1	0	4	63.6%Unassigned+31.7%Gly2
				HAC62	16	0	0	0	2	0	0	0	0	0	0	0	0	1	0	0	0	0	0	395	0	0	0	0	0	0	95.4%Gly2
				HAC63	69	0	316	0	6	0	0	0	0	0	0	0	0	0	0	0	0	0	0	0	0	0	0	0	0	0	80.8%Gaba10+17.6%Unassigned
				HAC64	259	0	4	0	0	0	2	0	0	102	0	0	0	0	0	0	0	0	6	0	0	1	0	0	0	0	69.3%Unassigned+27.3%Gaba17
				HAC65	83	0	1	0	2	0	3	0	0	0	0	0	41	0	0	222	0	0	0	0	0	0	0	0	0	0	63.1%Gaba7+23.6%Unassigned+11.6%Gaba4
				HAC66	98	0	0	0	0	0	0	0	0	0	0	193	0	0	0	0	0	0	0	0	0	0	0	0	0	0	66.3%Gaba3+33.7%Unassigned
				HAC67	272	0	0	0	0	1	0	0	0	0	0	0	0	0	0	0	0	0	0	0	0	0	0	0	0	0	99.6%Unassigned
				HAC68	16	201	0	0	0	0	0	0	0	1	0	0	0	0	0	0	0	0	0	0	0	0	0	0	0	0	92.2%Gaba1
				HAC69	40	147	3	0	0	0	1	0	0	0	0	0	3	0	0	1	0	0	0	0	0	0	0	0	0	0	75.4%Gaba1+20.5%Unassigned
				HAC70	155	0	0	0	10	0	0	0	0	0	20	0	0	0	0	0	10	0	0	0	0	0	0	0	0	0	79.5%Unassigned+10.3%Gaba2
				HAC71	8	0	0	0	0	0	0	0	0	0	0	0	0	152	0	0	0	0	0	0	0	1	0	0	0	0	94.4%Gaba5
				HAC72	72	0	0	0	0	0	0	69	0	0	0	0	0	0	0	0	0	0	0	0	0	0	0	0	0	0	51.1%Unassigned+48.9%Gaba15
				HAC73	62	0	0	0	0	0	0	0	0	0	0	0	0	0	0	79	0	0	0	0	0	0	0	0	0	0	56.0%Gaba7+44.0%Unassigned
				HAC74	26	0	0	0	0	0	0	0	0	0	0	0	0	0	0	0	0	0	0	0	0	0	7	0	1	0	76.5%Unassigned+20.6%Gly5
3.3 Mapping matrix between 74 clusters and 25 public macaque labeling
				cluster	Unassigned	Ga1	Ga10	Ga11	Ga12	Ga13	Ga14	Ga15	Ga16	Ga17	Ga18	Ga19	Ga2	Ga20	Ga21	Ga22	Ga23	Ga24	Ga25	Ga26	Ga3	Ga4	Ga5	Ga6	Ga7	Ga8	Ga9	Gl1	Gl2	Gl3	Gl4	Gl5	Gl6	Gl7	Gl8	annotation
				HAC1	12	0	0	0	0	0	0	0	0	0	0	0	0	0	0	0	0	0	0	0	0	0	0	0	0	0	0	0	0	0	0	0	0	1988	0	99.4%Gl7
				HAC2	7	0	0	0	0	0	0	0	0	0	0	0	0	0	0	0	0	0	0	0	0	0	0	0	0	0	0	0	0	0	0	0	0	0	1993	99.7%Gl8
				HAC3	1750	0	0	0	0	0	0	0	0	0	0	0	0	0	0	0	0	0	0	0	1	0	0	0	0	0	0	0	0	0	249	0	0	0	0	87.5%Unassigned+12.4%Gl4
				HAC4	165	0	0	0	0	0	0	0	0	0	0	0	4	0	2	2	0	0	0	0	0	0	1	0	0	0	1825	0	0	0	0	0	0	1	0	91.2%Ga9
				HAC5	107	0	0	1875	0	0	0	0	0	0	0	0	0	0	17	0	0	0	0	0	0	0	0	0	0	0	1	0	0	0	0	0	0	0	0	93.8%Ga11
				HAC6	1978	0	0	0	0	0	0	0	0	0	0	0	0	0	0	0	0	0	0	0	0	0	0	0	0	0	1	0	0	0	21	0	0	0	0	98.9%Unassigned
				HAC7	22	0	0	0	0	0	0	0	0	0	0	0	0	0	0	0	0	0	0	0	0	0	0	0	0	0	1978	0	0	0	0	0	0	0	0	98.9%Ga9
				HAC8	1795	0	0	204	0	0	0	0	0	0	0	0	0	0	0	0	0	0	0	0	0	0	0	0	0	0	1	0	0	0	0	0	0	0	0	89.8%Unassigned+10.2%Ga11
				HAC9	18	1982	0	0	0	0	0	0	0	0	0	0	0	0	0	0	0	0	0	0	0	0	0	0	0	0	0	0	0	0	0	0	0	0	0	99.1%Ga1
				HAC10	613	0	0	0	0	0	0	0	0	0	0	0	0	0	0	0	1387	0	0	0	0	0	0	0	0	0	0	0	0	0	0	0	0	0	0	69.3%Ga23+30.6%Unassigned
				HAC11	10	0	0	0	0	0	0	0	0	0	0	0	0	0	1989	0	0	0	0	0	0	0	0	0	0	0	1	0	0	0	0	0	0	0	0	99.5%Ga21
				HAC12	2	0	0	0	0	0	0	0	0	0	0	0	0	0	0	0	0	0	0	0	0	0	0	0	0	0	0	0	1998	0	0	0	0	0	0	99.9%Gl2
				HAC13	16	0	0	0	0	0	0	0	0	0	0	0	0	0	0	1984	0	0	0	0	0	0	0	0	0	0	0	0	0	0	0	0	0	0	0	99.2%Ga22
				HAC14	34	0	0	0	0	0	0	0	0	0	0	0	0	0	0	0	0	0	0	0	0	0	0	0	0	0	0	1964	2	0	0	0	0	0	0	98.2%Gl1
				HAC15	1623	0	0	0	0	0	0	0	0	0	0	0	0	0	0	0	0	0	0	0	0	0	0	0	0	0	0	0	3	0	0	0	372	2	0	81.2%Unassigned+18.6%Gl6
				HAC16	1857	0	0	0	0	0	0	0	0	0	0	0	0	0	142	0	0	0	0	0	0	0	0	0	0	0	0	0	0	0	1	0	0	0	0	92.8%Unassigned
				HAC17	5	0	0	0	0	0	0	0	0	0	0	0	0	0	0	0	0	0	0	0	0	0	0	0	0	0	0	0	0	1995	0	0	0	0	0	99.8%Gl3
				HAC18	1	0	0	0	0	0	0	0	0	0	0	0	0	0	0	0	0	0	0	0	0	0	0	0	0	0	0	0	0	0	1999	0	0	0	0	100.0%Gl4
				HAC19	46	0	1953	0	0	0	0	0	0	0	0	0	0	0	0	0	0	0	0	0	0	0	0	0	0	0	1	0	0	0	0	0	0	0	0	97.7%Ga10
				HAC20	1	0	0	0	0	0	0	0	0	0	0	0	0	0	0	0	0	0	0	0	0	0	1999	0	0	0	0	0	0	0	0	0	0	0	0	100.0%Ga5
				HAC21	399	0	0	0	0	0	0	0	0	1601	0	0	0	0	0	0	0	0	0	0	0	0	0	0	0	0	0	0	0	0	0	0	0	0	0	80.0%Ga17+20.0%Unassigned
				HAC22	13	0	0	0	0	0	0	0	0	0	0	0	0	0	0	0	0	0	0	0	0	0	0	0	0	1986	1	0	0	0	0	0	0	0	0	99.3%Ga8
				HAC23	1824	0	0	0	0	0	0	1	0	0	0	0	0	0	11	0	0	151	10	0	0	0	0	0	0	0	1	0	1	0	1	0	0	0	0	91.2%Unassigned
				HAC24	2000	0	0	0	0	0	0	0	0	0	0	0	0	0	0	0	0	0	0	0	0	0	0	0	0	0	0	0	0	0	0	0	0	0	0	100.0%Unassigned
				HAC25	12	0	0	0	1988	0	0	0	0	0	0	0	0	0	0	0	0	0	0	0	0	0	0	0	0	0	0	0	0	0	0	0	0	0	0	99.4%Ga12
				HAC26	271	0	0	0	0	0	0	0	0	0	0	0	0	0	0	0	1685	0	0	0	0	0	44	0	0	0	0	0	0	0	0	0	0	0	0	84.2%Ga23+13.6%Unassigned
				HAC27	9	0	0	0	0	0	0	0	1991	0	0	0	0	0	0	0	0	0	0	0	0	0	0	0	0	0	0	0	0	0	0	0	0	0	0	99.6%Ga16
				HAC28	3	0	0	0	0	0	0	0	0	0	0	0	0	0	0	0	0	0	0	0	0	1997	0	0	0	0	0	0	0	0	0	0	0	0	0	99.9%Ga4
				HAC29	1	0	0	0	0	0	0	0	0	0	0	0	1999	0	0	0	0	0	0	0	0	0	0	0	0	0	0	0	0	0	0	0	0	0	0	100.0%Ga2
				HAC30	13	0	0	0	0	0	0	1987	0	0	0	0	0	0	0	0	0	0	0	0	0	0	0	0	0	0	0	0	0	0	0	0	0	0	0	99.4%Ga15
				HAC31	1105	0	0	0	0	0	0	0	0	0	0	0	0	0	0	2	0	0	0	0	0	0	0	0	0	0	0	0	0	0	0	0	893	0	0	55.2%Unassigned+44.6%Gl6
				HAC32	6	0	0	0	0	0	0	0	0	0	0	0	0	0	0	0	0	0	0	0	0	0	0	1994	0	0	0	0	0	0	0	0	0	0	0	99.7%Ga6
				HAC33	1998	0	0	0	0	0	0	0	0	0	0	0	0	0	0	0	0	1	0	0	0	0	0	0	0	0	0	1	0	0	0	0	0	0	0	99.9%Unassigned
				HAC34	6	0	0	0	0	0	0	0	0	0	0	0	0	0	0	0	0	0	0	0	0	0	0	0	0	1993	0	0	0	0	1	0	0	0	0	99.7%Ga8
				HAC35	10	0	0	0	0	0	0	0	0	0	0	1990	0	0	0	0	0	0	0	0	0	0	0	0	0	0	0	0	0	0	0	0	0	0	0	99.5%Ga19
				HAC36	1855	0	0	0	0	0	0	0	0	0	0	0	86	0	12	0	3	0	0	0	0	0	0	1	6	16	0	0	1	0	0	0	0	20	0	92.8%Unassigned
				HAC37	29	0	0	0	0	0	1971	0	0	0	0	0	0	0	0	0	0	0	0	0	0	0	0	0	0	0	0	0	0	0	0	0	0	0	0	98.6%Ga14
				HAC38	31	0	0	0	0	0	0	0	0	0	0	0	0	0	1	0	0	1965	0	0	0	0	0	0	0	0	0	0	0	0	2	0	1	0	0	98.2%Ga24
				HAC39	122	0	0	0	0	0	0	0	0	0	0	0	0	0	0	0	0	0	0	0	0	0	0	1	0	0	0	0	0	0	0	1735	0	0	9	92.9%Gl5
				HAC40	18	0	0	0	0	1721	0	0	0	0	0	0	0	0	0	0	0	0	0	0	0	0	0	0	0	0	0	0	0	0	0	0	0	0	0	99.0%Ga13
				HAC41	874	0	0	0	0	0	0	0	0	0	0	0	0	0	0	0	827	1	0	0	0	0	0	0	0	0	13	0	1	0	0	0	1	0	0	50.9%Unassigned+48.2%Ga23
				HAC42	10	0	0	0	0	0	0	0	0	0	0	0	0	0	0	0	0	0	1682	0	0	0	0	0	0	0	0	0	0	0	0	0	0	0	0	99.4%Ga25
				HAC43	17	0	0	0	0	0	0	0	0	0	0	0	0	1489	0	0	0	0	0	0	0	0	0	0	0	0	0	0	0	0	0	0	0	0	0	98.9%Ga20
				HAC44	1	0	0	0	0	0	0	0	0	0	0	0	0	0	0	0	0	0	0	0	0	0	0	0	1452	0	0	0	0	0	0	0	0	0	0	99.9%Ga7
				HAC45	128	0	0	0	0	0	0	0	0	0	0	0	0	0	0	0	0	2	0	1311	0	0	0	0	0	0	1	0	0	0	0	0	0	0	0	90.9%Ga26
				HAC46	635	0	0	0	0	0	0	0	0	0	4	181	0	0	0	0	0	0	0	0	0	0	0	0	0	0	0	0	0	0	0	0	0	0	560	46.0%Unassigned+40.6%Gl8+13.1%Ga19
				HAC47	1	0	0	0	0	0	0	0	0	0	0	0	0	0	1182	0	0	0	0	0	0	0	0	0	0	0	0	0	0	0	0	0	0	0	0	99.9%Ga21
				HAC48	199	0	0	0	0	0	0	0	0	0	0	5	0	0	1	0	0	0	0	0	0	0	0	0	20	0	0	0	0	0	0	0	0	0	935	80.6%Gl8+17.2%Unassigned
				HAC49	502	0	0	0	0	0	0	0	0	0	0	0	0	0	0	0	1	0	0	0	0	0	0	0	0	0	0	0	0	0	68	0	537	0	1	48.4%Gl6+45.3%Unassigned
				HAC50	9	0	0	0	0	0	0	0	0	0	0	0	0	0	0	0	0	0	0	0	0	0	0	0	0	0	0	0	0	0	1	1002	0	0	0	99.0%Gl5
				HAC51	4	0	0	0	0	0	0	0	0	0	0	0	0	0	0	0	0	0	0	0	895	0	0	0	0	0	0	0	0	0	0	0	0	0	0	99.6%Ga3
				HAC52	2	0	0	0	0	892	0	0	0	0	0	0	0	0	0	0	0	0	0	0	0	0	0	0	0	0	0	0	0	0	0	0	0	0	0	99.8%Ga13
				HAC53	657	0	0	0	0	0	0	0	0	0	0	0	0	0	0	0	0	0	0	0	0	7	0	0	0	0	0	0	0	0	0	0	33	0	0	94.3%Unassigned
				HAC54	355	0	0	0	0	0	0	0	0	0	0	0	0	0	0	0	0	0	0	0	0	0	0	0	0	0	0	0	0	0	191	0	123	1	0	53.0%Unassigned+28.5%Gl4+18.4%Gl6
				HAC55	276	0	0	0	0	1	0	0	1	1	0	0	0	0	2	0	0	3	357	0	0	0	5	3	0	0	5	0	0	0	6	0	2	0	0	53.9%Ga25+41.7%Unassigned
				HAC56	35	0	0	0	0	0	0	0	0	0	0	0	0	0	0	0	0	0	0	0	0	1	0	0	0	0	524	0	0	0	9	0	0	0	0	92.1%Ga9
				HAC57	168	4	0	0	0	0	0	0	0	0	0	0	0	0	0	0	0	0	0	0	0	0	0	0	0	0	1	0	0	0	0	0	340	0	0	66.3%Gl6+32.7%Unassigned
				HAC58	434	23	0	0	0	0	0	0	0	0	0	2	0	0	0	0	0	0	0	0	1	0	0	0	0	0	0	0	0	0	7	0	3	0	0	92.3%Unassigned
				HAC59	25	0	0	0	0	0	0	0	0	0	0	0	0	0	0	0	0	0	0	0	0	0	0	0	0	0	0	0	0	0	0	0	433	0	0	94.5%Gl6
				HAC60	23	0	0	0	0	0	0	0	0	0	429	0	0	0	1	0	0	0	0	0	0	0	0	0	0	0	0	0	0	0	0	0	0	0	0	94.7%Ga18
				HAC61	44	0	0	0	0	0	0	0	0	383	0	0	0	0	0	0	0	0	0	0	0	0	0	0	0	0	0	0	0	0	2	0	0	0	0	89.3%Ga17+10.3%Unassigned
				HAC62	274	0	0	0	0	0	0	0	0	0	0	0	0	0	0	0	0	0	1	0	0	0	0	0	0	0	0	0	0	0	2	131	6	0	0	66.2%Unassigned+31.6%Gl5
				HAC63	344	0	0	0	0	0	0	2	39	0	0	2	0	0	0	0	0	0	0	0	0	0	0	0	0	0	0	0	0	0	4	0	0	0	0	88.0%Unassigned
				HAC64	300	0	0	0	1	0	0	0	0	0	0	0	66	0	0	0	0	0	6	0	0	0	0	0	0	0	0	0	0	0	1	0	0	0	0	80.2%Unassigned+17.6%Ga2
				HAC65	231	0	0	78	0	1	0	0	0	0	0	1	0	0	0	0	0	0	0	0	0	0	0	0	0	0	1	0	0	0	26	0	14	0	0	65.6%Unassigned+22.2%Ga11
				HAC66	118	0	0	0	0	0	0	0	0	0	0	0	0	0	0	0	0	0	173	0	0	0	0	0	0	0	0	0	0	0	0	0	0	0	0	59.5%Ga25+40.5%Unassigned
				HAC67	99	0	0	0	0	0	2	0	0	0	0	0	0	171	0	0	0	0	0	0	0	0	0	0	0	0	0	0	0	0	0	0	1	0	0	62.6%Ga20+36.3%Unassigned
				HAC68	170	0	0	0	0	0	0	0	0	0	0	0	0	0	0	0	0	0	20	0	0	0	0	0	0	0	0	0	0	0	0	0	28	0	0	78.0%Unassigned+12.8%Gl6
				HAC69	59	0	0	0	1	25	0	0	1	0	0	0	0	0	0	1	5	0	0	0	0	0	0	0	0	0	0	0	0	0	0	0	103	0	0	52.8%Gl6+30.3%Unassigned+12.8%Ga13
				HAC70	154	0	0	0	0	0	0	1	27	0	0	9	0	0	2	0	0	0	0	0	0	0	0	0	0	0	0	0	2	0	0	0	0	0	0	79.0%Unassigned+13.8%Ga16
				HAC71	42	0	0	0	0	0	0	0	0	0	0	0	0	0	0	0	117	0	0	0	0	0	0	0	0	0	0	0	0	0	1	0	1	0	0	72.7%Ga23+26.1%Unassigned
				HAC72	135	0	0	0	0	0	0	0	0	0	0	0	0	0	1	0	0	2	0	3	0	0	0	0	0	0	0	0	0	0	0	0	0	0	0	95.7%Unassigned
				HAC73	96	0	0	0	0	0	0	0	0	0	0	0	0	1	32	0	0	0	0	0	0	0	0	0	0	0	0	0	0	0	3	0	9	0	0	68.1%Unassigned+22.7%Ga21
				HAC74	20	0	0	0	0	0	0	0	0	0	0	0	0	0	0	0	0	0	0	0	0	0	0	0	0	0	0	0	0	0	5	0	6	3	0	58.8%Unassigned+17.6%Gl6+14.7%Gl4
3.4 Mapping matrix between 74 clusters and 63 public mouse labeling
				cluster	Unassigned	AC1	AC10	AC11	AC12	AC13	AC14	AC15	AC16	AC17	AC18	AC19	AC2	AC20	AC21	AC22	AC23	AC24	AC25	AC26	AC27	AC28	AC29	AC3	AC30	AC31	AC32	AC33	AC35	AC36	AC37	AC38	AC39	AC4	AC40	AC41	AC42	AC43	AC45	AC46	AC47	AC48	AC49	AC5	AC50
				HAC1	7	0	0	0	0	0	0	0	0	0	0	0	0	0	0	0	0	0	0	0	0	0	0	0	0	0	0	1993	0	0	0	0	0	0	0	0	0	0	0	0	0	0	0	0	0
				HAC2	0	0	0	0	0	0	0	0	0	0	0	0	0	0	0	0	0	0	0	0	0	0	0	2000	0	0	0	0	0	0	0	0	0	0	0	0	0	0	0	0	0	0	0	0	0
				HAC3	2	0	0	0	0	0	0	0	0	0	0	0	0	0	0	0	0	0	0	0	0	0	0	0	0	0	0	0	0	0	0	0	0	0	0	0	0	0	0	0	0	0	0	0	0
				HAC4	12	0	0	0	0	0	0	0	0	0	0	0	0	0	0	0	1988	0	0	0	0	0	0	0	0	0	0	0	0	0	0	0	0	0	0	0	0	0	0	0	0	0	0	0	0
				HAC5	198	0	0	0	0	0	0	0	0	0	0	0	1802	0	0	0	0	0	0	0	0	0	0	0	0	0	0	0	0	0	0	0	0	0	0	0	0	0	0	0	0	0	0	0	0
				HAC6	2	0	0	0	0	1998	0	0	0	0	0	0	0	0	0	0	0	0	0	0	0	0	0	0	0	0	0	0	0	0	0	0	0	0	0	0	0	0	0	0	0	0	0	0	0
				HAC7	23	0	0	0	0	0	0	0	0	0	0	0	0	0	0	0	0	0	0	1977	0	0	0	0	0	0	0	0	0	0	0	0	0	0	0	0	0	0	0	0	0	0	0	0	0
				HAC8	39	0	0	0	0	0	0	0	0	0	0	0	1957	0	0	0	0	0	0	0	0	0	0	0	0	0	0	0	0	0	0	0	0	0	0	0	0	0	0	0	0	0	0	0	0
				HAC9	3	0	0	0	0	0	0	0	0	0	0	0	0	0	0	0	0	0	0	0	0	0	0	0	0	0	0	0	0	0	0	0	0	0	0	0	0	0	0	0	0	0	0	0	0
				HAC10	3	0	0	0	0	0	0	0	0	1997	0	0	0	0	0	0	0	0	0	0	0	0	0	0	0	0	0	0	0	0	0	0	0	0	0	0	0	0	0	0	0	0	0	0	0
				HAC11	5	0	0	0	0	0	1995	0	0	0	0	0	0	0	0	0	0	0	0	0	0	0	0	0	0	0	0	0	0	0	0	0	0	0	0	0	0	0	0	0	0	0	0	0	0
				HAC12	3	0	0	0	0	0	0	0	0	0	0	0	0	0	0	0	0	0	0	0	0	0	0	0	0	0	0	0	0	0	0	0	0	0	0	0	0	0	0	0	0	0	0	0	0
				HAC13	18	0	0	0	0	0	0	0	0	0	0	0	0	0	0	0	0	0	1982	0	0	0	0	0	0	0	0	0	0	0	0	0	0	0	0	0	0	0	0	0	0	0	0	0	0
				HAC14	10	0	1990	0	0	0	0	0	0	0	0	0	0	0	0	0	0	0	0	0	0	0	0	0	0	0	0	0	0	0	0	0	0	0	0	0	0	0	0	0	0	0	0	0	0
				HAC15	1	0	0	0	0	0	0	0	0	0	0	1999	0	0	0	0	0	0	0	0	0	0	0	0	0	0	0	0	0	0	0	0	0	0	0	0	0	0	0	0	0	0	0	0	0
				HAC16	9	1991	0	0	0	0	0	0	0	0	0	0	0	0	0	0	0	0	0	0	0	0	0	0	0	0	0	0	0	0	0	0	0	0	0	0	0	0	0	0	0	0	0	0	0
				HAC17	3	0	0	0	0	0	0	0	0	0	0	0	0	0	0	0	0	0	0	0	0	0	0	0	0	0	0	0	0	0	0	0	0	1997	0	0	0	0	0	0	0	0	0	0	0
				HAC18	2	0	0	0	1998	0	0	0	0	0	0	0	0	0	0	0	0	0	0	0	0	0	0	0	0	0	0	0	0	0	0	0	0	0	0	0	0	0	0	0	0	0	0	0	0
				HAC19	42	0	0	0	0	0	0	0	0	0	0	0	0	0	1958	0	0	0	0	0	0	0	0	0	0	0	0	0	0	0	0	0	0	0	0	0	0	0	0	0	0	0	0	0	0
				HAC20	5	0	0	0	0	0	0	0	0	0	0	0	0	0	0	0	0	0	0	0	0	0	0	0	0	0	0	0	0	0	0	0	0	0	0	0	0	0	0	1995	0	0	0	0	0
				HAC21	1	0	0	1999	0	0	0	0	0	0	0	0	0	0	0	0	0	0	0	0	0	0	0	0	0	0	0	0	0	0	0	0	0	0	0	0	0	0	0	0	0	0	0	0	0
				HAC22	996	0	0	0	0	0	0	0	0	0	0	0	0	2	0	0	0	0	0	0	0	0	0	0	0	0	0	0	0	0	0	0	0	0	0	0	0	0	0	0	0	0	0	0	979
				HAC23	475	0	0	0	0	0	0	0	0	0	0	0	0	0	0	0	0	0	0	0	0	0	0	0	0	0	0	0	0	0	0	0	0	0	0	0	1520	0	0	0	0	0	0	0	0
				HAC24	0	0	0	0	0	0	0	0	0	0	0	0	0	0	0	0	0	0	0	0	0	0	0	0	0	0	0	0	0	0	0	0	0	0	0	0	0	0	0	0	0	0	0	2000	0
				HAC25	1646	0	0	0	0	0	0	0	0	0	0	0	0	0	294	1	0	0	0	0	0	0	0	0	0	1	0	0	0	0	0	0	0	0	0	0	0	0	0	0	0	0	58	0	0
				HAC26	1828	0	0	0	0	0	0	0	0	136	0	0	0	0	0	0	0	0	0	0	0	0	0	0	0	0	0	0	0	0	0	0	36	0	0	0	0	0	0	0	0	0	0	0	0
				HAC27	0	0	0	0	0	0	0	0	0	0	0	0	0	0	0	0	0	0	0	0	0	0	0	0	0	0	0	0	0	0	0	0	0	0	0	0	0	0	0	0	0	0	0	0	0
				HAC28	1	0	0	0	0	0	0	0	0	0	0	0	0	0	0	1999	0	0	0	0	0	0	0	0	0	0	0	0	0	0	0	0	0	0	0	0	0	0	0	0	0	0	0	0	0
				HAC29	115	0	0	0	0	0	0	0	0	0	0	0	0	0	0	0	0	0	0	0	0	0	0	0	0	0	0	0	0	0	0	0	0	0	0	0	0	0	0	0	0	0	1885	0	0
				HAC30	1828	0	0	0	0	0	0	0	0	0	0	0	0	0	13	0	0	0	0	0	0	0	0	0	0	1	0	0	0	0	0	4	0	0	0	0	0	0	0	0	0	0	0	0	0
				HAC31	1	0	0	0	0	0	0	0	0	0	0	0	0	0	0	0	0	0	0	0	0	0	0	0	0	0	0	0	0	0	0	0	0	0	0	0	0	0	0	0	0	0	0	0	0
				HAC32	11	0	0	0	0	0	0	0	0	0	0	0	0	0	0	0	0	0	0	0	0	0	0	0	0	0	0	0	0	0	0	0	1989	0	0	0	0	0	0	0	0	0	0	0	0
				HAC33	1	0	0	0	0	0	0	0	0	0	0	0	0	0	0	0	0	0	0	0	0	0	0	0	1999	0	0	0	0	0	0	0	0	0	0	0	0	0	0	0	0	0	0	0	0
				HAC34	13	0	0	0	0	0	0	0	0	0	0	0	0	0	0	0	0	0	0	0	0	0	0	0	0	0	0	0	0	0	0	0	0	0	0	0	0	0	0	0	0	0	0	0	1987
				HAC35	6	0	0	0	0	0	0	0	0	0	0	0	0	0	0	0	0	0	0	0	0	0	0	0	0	1994	0	0	0	0	0	0	0	0	0	0	0	0	0	0	0	0	0	0	0
				HAC36	63	0	0	0	0	0	0	0	0	0	0	0	0	0	0	0	0	0	0	0	0	0	0	0	0	0	0	0	0	0	0	0	0	0	0	0	0	0	0	0	1934	0	0	0	1
				HAC37	3	0	0	0	0	0	0	0	0	0	0	0	0	0	0	0	0	0	0	0	0	0	0	0	0	0	0	0	0	0	0	0	0	0	0	0	0	0	0	0	0	1997	0	0	0
				HAC38	3	0	0	0	0	0	0	0	0	0	0	0	0	1997	0	0	0	0	0	0	0	0	0	0	0	0	0	0	0	0	0	0	0	0	0	0	0	0	0	0	0	0	0	0	0
				HAC39	5	0	0	0	0	0	0	0	0	0	0	0	0	0	0	0	0	0	0	0	0	0	0	0	0	0	0	0	0	0	1862	0	0	0	0	0	0	0	0	0	0	0	0	0	0
				HAC40	8	0	0	0	0	0	0	0	0	0	0	0	0	0	0	0	0	0	0	0	0	0	0	0	0	0	1731	0	0	0	0	0	0	0	0	0	0	0	0	0	0	0	0	0	0
				HAC41	2	0	0	0	0	0	0	0	0	0	0	0	0	0	0	0	0	1715	0	0	0	0	0	0	0	0	0	0	0	0	0	0	0	0	0	0	0	0	0	0	0	0	0	0	0
				HAC42	9	0	0	0	0	0	0	0	0	0	0	0	0	0	0	0	0	0	0	0	0	0	0	0	0	0	0	0	0	0	0	0	0	0	0	0	0	0	1683	0	0	0	0	0	0
				HAC43	10	0	0	0	0	0	0	0	0	0	0	0	0	0	0	0	0	0	0	0	0	0	0	0	0	0	0	0	0	0	0	1496	0	0	0	0	0	0	0	0	0	0	0	0	0
				HAC44	36	0	0	0	0	0	0	0	0	0	0	0	0	0	0	0	0	0	0	0	0	0	0	0	0	0	0	0	0	0	0	0	0	0	1417	0	0	0	0	0	0	0	0	0	0
				HAC45	131	0	0	0	0	0	0	0	0	0	0	0	0	0	0	0	0	0	0	0	0	0	0	0	0	0	0	0	0	0	0	0	0	0	0	0	0	0	0	0	0	0	0	0	0
				HAC46	11	0	0	0	0	0	0	0	0	0	1369	0	0	0	0	0	0	0	0	0	0	0	0	0	0	0	0	0	0	0	0	0	0	0	0	0	0	0	0	0	0	0	0	0	0
				HAC47	1	0	0	0	0	0	0	0	0	0	0	0	0	0	0	0	0	0	0	0	1182	0	0	0	0	0	0	0	0	0	0	0	0	0	0	0	0	0	0	0	0	0	0	0	0
				HAC48	9	0	0	0	0	0	0	0	0	0	0	0	0	0	0	0	0	0	0	0	0	0	0	0	0	0	0	0	0	1151	0	0	0	0	0	0	0	0	0	0	0	0	0	0	0
				HAC49	7	0	0	0	0	0	0	0	0	0	0	0	0	0	0	0	0	0	0	0	0	1102	0	0	0	0	0	0	0	0	0	0	0	0	0	0	0	0	0	0	0	0	0	0	0
				HAC50	12	0	0	0	1	0	0	999	0	0	0	0	0	0	0	0	0	0	0	0	0	0	0	0	0	0	0	0	0	0	0	0	0	0	0	0	0	0	0	0	0	0	0	0	0
				HAC51	4	0	0	0	0	0	0	0	0	0	0	0	0	0	0	0	0	0	0	0	0	0	895	0	0	0	0	0	0	0	0	0	0	0	0	0	0	0	0	0	0	0	0	0	0
				HAC52	75	0	0	0	0	0	0	0	0	0	0	0	0	0	0	0	0	0	0	0	0	0	0	0	0	0	819	0	0	0	0	0	0	0	0	0	0	0	0	0	0	0	0	0	0
				HAC53	48	0	0	0	0	0	0	0	0	0	0	0	0	0	0	13	0	0	0	0	0	0	0	0	0	0	0	0	0	0	0	0	0	0	0	0	0	636	0	0	0	0	0	0	0
				HAC54	625	0	0	0	6	7	0	0	1	0	0	2	0	0	0	0	0	0	0	0	0	0	0	0	0	0	0	2	27	0	0	0	0	0	0	0	0	0	0	0	0	0	0	0	0
				HAC55	24	0	0	0	0	0	0	0	0	0	0	0	0	0	0	0	0	0	0	0	0	0	0	0	0	0	0	0	0	0	0	0	0	0	0	637	0	0	0	0	0	0	0	0	0
				HAC56	505	0	0	0	0	0	0	0	5	0	0	0	0	0	0	2	27	0	0	18	0	0	0	0	0	0	0	0	3	0	0	0	0	0	0	0	0	0	0	0	0	0	0	2	0
				HAC57	64	0	0	0	0	0	0	0	0	0	0	0	0	0	0	0	0	0	0	0	0	443	0	0	0	0	0	0	0	0	0	0	0	0	0	0	0	4	0	0	0	0	0	0	0
				HAC58	107	0	0	0	0	0	0	0	2	0	0	0	0	0	0	0	0	0	0	0	0	0	0	0	0	0	0	0	0	0	0	0	0	0	0	0	0	0	0	0	0	0	0	0	0
				HAC59	18	0	0	0	0	0	0	0	0	0	0	0	0	0	0	0	0	0	0	0	0	0	0	0	0	0	0	0	440	0	0	0	0	0	0	0	0	0	0	0	0	0	0	0	0
				HAC60	15	0	0	0	0	0	0	0	0	0	0	0	0	0	0	0	0	0	0	0	0	0	0	0	0	0	0	0	0	0	0	0	0	0	0	0	0	0	0	0	0	1	0	0	0
				HAC61	317	0	0	3	0	0	0	1	0	0	0	0	0	0	0	0	0	0	0	0	1	0	3	0	0	0	0	0	0	0	0	0	2	0	0	0	0	0	0	2	0	0	0	0	0
				HAC62	10	0	0	0	0	0	0	0	403	0	0	0	0	0	0	0	0	0	0	0	0	0	0	0	0	0	0	0	0	0	0	0	0	0	0	0	0	0	0	0	0	0	0	0	0
				HAC63	0	0	0	0	0	0	0	0	0	0	0	0	0	0	0	0	0	0	0	0	0	0	0	0	0	0	0	0	0	0	0	0	0	0	0	0	0	0	0	0	0	0	0	0	0
				HAC64	9	0	0	0	0	0	0	0	0	0	0	0	0	0	0	0	0	0	0	0	0	0	0	0	0	0	0	0	0	0	0	0	0	0	0	0	0	0	0	0	0	0	365	0	0
				HAC65	249	0	0	0	0	0	0	0	100	0	0	0	2	0	0	0	0	0	0	0	0	0	0	0	0	0	0	0	0	0	0	0	0	0	0	0	0	0	0	0	0	0	0	0	0
				HAC66	18	0	0	3	0	0	0	0	0	0	0	0	0	0	0	0	0	0	0	0	0	0	0	0	0	0	0	0	0	0	0	0	0	0	0	0	0	0	0	0	0	0	0	0	0
				HAC67	150	0	0	0	0	0	0	0	0	0	0	0	0	0	0	0	0	0	0	0	0	0	0	0	0	0	0	0	0	0	0	118	0	0	0	0	0	0	0	0	0	5	0	0	0
				HAC68	110	0	0	0	0	0	0	0	0	0	0	0	0	0	0	0	0	0	0	0	0	11	0	0	0	0	0	0	0	0	0	0	0	0	0	0	0	1	93	0	0	1	0	0	0
				HAC69	135	0	0	0	0	0	0	0	0	0	0	0	0	0	11	0	0	0	0	0	0	41	0	0	0	0	5	0	0	0	0	0	0	0	0	0	0	0	0	0	0	3	0	0	0
				HAC70	55	0	0	0	0	0	0	0	0	0	0	0	0	0	0	0	0	0	0	0	0	0	0	0	0	0	0	0	0	0	0	0	0	0	0	0	0	0	0	0	0	0	0	0	0
				HAC71	153	0	0	0	0	0	0	0	0	5	0	0	0	0	0	0	0	0	0	0	0	0	0	0	0	0	0	0	0	0	0	0	0	0	0	0	0	0	0	0	0	0	0	0	0
				HAC72	69	0	0	0	0	0	0	0	0	0	0	0	0	0	0	0	0	0	0	0	0	0	0	0	0	0	0	0	0	0	0	0	0	0	0	0	0	0	0	0	0	0	0	0	0
				HAC73	104	0	0	0	0	0	36	0	1	0	0	0	0	0	0	0	0	0	0	0	0	0	0	0	0	0	0	0	0	0	0	0	0	0	0	0	0	0	0	0	0	0	0	0	0
				HAC74	30	0	0	0	0	0	0	0	0	0	0	0	0	0	0	0	0	0	0	0	0	0	0	0	2	0	0	2	0	0	0	0	0	0	0	0	0	0	0	0	0	0	0	0	0
[truncated: 16 more columns]

## Sheet: RGC
1. Label transferring for human clusters from mouse and macaque
no.	cluster	freq	RGC_name_bymarker	RGC_fullname	RGC_marker	RGC_celltype_Sanes12	RGC_mapping_Sanes12	RGC_celltype_OT21	RGC_mapping_OT21	RGC_celltype_macaque18	RGC_mapping_macaque18	RGC_celltype_mouse45	RGC_mapping_mouse45
1	HRGC1	51361	MG_OFF	OFF midget RGC	TBR1	MG-OFF	99.8%scRNA_MG-OFF	MG_OFF	97.9%nShekhar_MG_OFF	MG_OFF	98.4%macaque_MG_OFF		48.9%Unassigned+31.5%mouse_27_Novel+17.7%mouse_21_Tbr1_S2
2	HRGC2	36314	MG_ON	ON midget RGC	TPBG	MG-ON	99.1%scRNA_MG-ON	MG_ON	98.9%nShekhar_MG_ON	MG_ON	96.2%macaque_MG_ON		87.3%mouse_10_Novel+11.2%Unassigned
3	HRGC3	3158	HRGC3				63.4%scRNA_MG-OFF+26.7%Unassigned		69.4%nShekhar_MG_OFF+20.8%nShekhar_MG_ON		88.2%Unassigned+11.6%macaque_MG_OFF	17_Tbr1_S1	99.9%mouse_17_Tbr1_S1
4	HRGC4	2856	HRGC4				79.4%Unassigned+17.2%scRNA_MG-ON		83.6%Unassigned		56.0%macaque_RGC9+33.1%Unassigned	23_W3D2	94.5%mouse_23_W3D2
5	HRGC5	1522	HRGC5				48.6%scRNA_MG-OFF+28.3%Unassigned+23.0%scRNA_MG-ON		60.3%nShekhar_MG_OFF+28.6%nShekhar_MG_ON+11.1%Unassigned		89.2%macaque_RGC12+10.2%Unassigned	16_ooDS_DV	99.7%mouse_16_ooDS_DV
6	HRGC6	990	PG_OFF	OFF parasol RGC	FABP4	PG-OFF	98.4%scRNA_PG-OFF	PG_OFF	99.7%nShekhar_PG_OFF		47.5%macaque_RGC17+25.8%Unassigned+21.3%macaque_MG_ON		74.2%mouse_15_Novel+15.0%Unassigned+10.8%mouse_3_FminiON
7	HRGC7	816	PG_ON	ON parasol RGC	CHRNA2	PG-ON	99.4%scRNA_PG-ON	PG_ON	98.9%nShekhar_PG_ON		54.2%Unassigned+41.4%macaque_RGC16	12_ooDS_NT	99.6%mouse_12_ooDS_NT
8	HRGC8	670	HRGC8				84.5%Unassigned		92.5%Unassigned		97.4%Unassigned		44.0%Unassigned+35.2%mouse_9_Tbr1_Novel+20.8%mouse_22_M5
9	HRGC9	472	HRGC9				83.5%scRNA_hRGC5+14.8%Unassigned		83.1%Unassigned+14.0%nShekhar_PG_ON		70.8%macaque_MG_ON+29.2%Unassigned	13_Novel	95.1%mouse_13_Novel
10	HRGC10	448	ipRGC	intrinsically photosensitive RGC	OPN4		76.1%scRNA_hRGC5+22.1%Unassigned		81.9%nShekhar_RGC6+16.6%Unassigned		83.9%macaque_RGC15+13.4%Unassigned	7_Novel	98.2%mouse_7_Novel
11	HRGC11	393	HRGC11				89.0%Unassigned		85.1%nShekhar_RGC5+14.1%Unassigned		82.3%Unassigned+15.9%macaque_RGC12		52.6%mouse_20_Novel+13.8%Unassigned+13.8%mouse_28_FmidiOFF+11.5%mouse_29_Novel
12	HRGC12	334	HRGC12				74.1%Unassigned+13.0%scRNA_hRGC8		75.6%Unassigned+12.3%nShekhar_RGC9+10.5%nShekhar_RGC7		64.8%Unassigned+13.6%macaque_RGC10+10.8%macaque_RGC6		43.1%mouse_1_W3D1.1+40.7%Unassigned+15.1%mouse_35_Novel
13	HRGC13	216	HRGC13			PG-OFF	94.4%scRNA_PG-OFF	RGC4	97.2%nShekhar_RGC4		76.9%macaque_PG_OFF+19.9%Unassigned		82.9%mouse_34_Novel+14.8%Unassigned
14	HRGC14	124	HRGC14			PG-OFF	91.1%scRNA_PG-OFF		68.5%nShekhar_PG_OFF+16.1%nShekhar_RGC4+15.3%Unassigned	PG_OFF	97.6%macaque_PG_OFF		72.6%Unassigned+20.2%mouse_42_AlphaOFFS
15	HRGC15	33	HRGC15			PG-ON	93.9%scRNA_PG-ON		51.5%Unassigned+30.3%nShekhar_PG_ON		48.5%Unassigned+33.3%macaque_PG_ON+18.2%macaque_RGC16		42.4%Unassigned+42.4%mouse_39_Novel+12.1%mouse_12_ooDS_NT
	total	99707
Note:
A. Description of table columns
	Column1	no.	ID
	Column2	cluster	Cluster ID
	Column3	freq	The number of cells per cluster
	Column4	RGC_name_bymarker	The cell type identified by markers
	Column5	RGC_fullname	The full name of the cell type
	Column6	RGC_marker	The RGC markers used to identify the cell type
	Column7	RGC_celltype_Sanes12	The corresponding public cell type labeling from Sanes dataset by SATURN cross-species analysis
	Column8	RGC_mapping_Sanes12	The cell proportions of public labeling predicted using SATURN co-embedding
	Column9	RGC_celltype_OT21	The corresponding orthogonal types from Shekhar's dataset by SATURN cross-species analysis
	Column10	RGC_mapping_OT21	The cell proportions of orthogonal types from Shekhar's dataset by SATURN cross-species analysis
	Column11	RGC_celltype_macaque18	The corresponding macaque cell type by SATURN cross-species analysis
	Column12	RGC_mapping_macaque18	The cell proportions of macaque cell types predicted using SATURN co-embedding
	Column13	RGC_celltype_mouse45	The corresponding mouse cell type by SATURN cross-species analysis
	Column14	RGC_mapping_mouse45	The cell proportions of mouse cell types predicted using SATURN co-embedding

## Sheet: RGC_toprankedgene
group	names	logfoldchanges	pvals	pvals_adj	scores
HRGC1	NLGN1	3.00518	0	0	166.784
HRGC1	MEIS2	2.58897	0	0	149.088
HRGC1	RGS6	1.76817	0	0	115.464
HRGC1	LRRC4C	0.804362	0	0	112.319
HRGC1	CNTN4	1.70534	0	0	109.758
HRGC1	SORCS1	1.04601	0	0	108.759
HRGC1	SLC24A3	1.34883	0	0	107.942
HRGC1	TFAP2D	2.99798	0	0	105.546
HRGC1	MAML2	1.84441	0	0	103.235
HRGC1	UNC13C	0.909538	0	0	101.803
HRGC1	LIFR	1.10845	0	0	93.5158
HRGC1	IQCJ-SCHIP1	0.945534	0	0	91.6715
HRGC1	KCNIP4	0.441292	0	0	91.5243
HRGC1	SOX6	2.02125	0	0	91.3312
HRGC1	TMTC1	1.30434	0	0	90.2256
HRGC1	PRKG1	0.503839	0	0	89.3066
HRGC1	SNTG1	1.07106	0	0	88.6486
HRGC1	SLC4A4	0.684551	0	0	87.0579
HRGC1	TRPM3	1.19447	0	0	84.8883
HRGC1	GALNTL6	0.758749	0	0	84.3576
HRGC2	SLIT3	3.17031	0	0	179.219
HRGC2	CRNDE	2.74759	0	0	146.902
HRGC2	CNTN5	1.86282	0	0	130.315
HRGC2	PCDH15	2.75814	0	0	121.823
HRGC2	EBF2	2.97241	0	0	121.206
HRGC2	DACH1	1.3564	0	0	121.194
HRGC2	ZNF536	3.81393	0	0	110.037
HRGC2	DPP10	0.947738	0	0	107.585
HRGC2	PTPRE	2.13058	0	0	105.998
HRGC2	NKAIN3	2.11713	0	0	103.2
HRGC2	PTPRG	0.848662	0	0	100.243
HRGC2	ADGRL2	1.1484	0	0	96.4567
HRGC2	KANK4	1.78532	0	0	93.8795
HRGC2	CLSTN2	0.992352	0	0	93.1312
HRGC2	LDLRAD4	1.08956	0	0	91.9072
HRGC2	RBFOX1	0.441351	0	0	84.8311
HRGC2	ZNF804B	1.47332	0	0	82.8385
HRGC2	TCERG1L	1.18621	0	0	80.2029
HRGC2	TLE4	0.950364	0	0	79.1839
HRGC2	ENOX1	0.569495	0	0	78.5812
HRGC3	OPCML	0.825219	0	0	50.3311
HRGC3	DSCAM	0.601238	0	0	48.375
HRGC3	KAZN	0.583465	0	0	46.1569
HRGC3	NEAT1	0.573722	0	0	44.5331
HRGC3	RBFOX1	0.521872	0	0	42.1126
HRGC3	KCNIP4	0.454767	0	0	39.2678
HRGC3	NTRK3	0.902154	0	0	38.8553
HRGC3	CNTNAP5	0.73189	0	0	38.6789
HRGC3	KCNMA1	0.901243	0	0	38.4035
HRGC3	RORA	0.481849	0	0	38.1174
HRGC3	ZBTB7C	0.809065	4.73445e-298	5.63625e-296	36.8993
HRGC3	SYN3	0.621748	1.99895e-283	2.27153e-281	35.9758
HRGC3	FRMD4A	0.902282	1.2993e-278	1.4278e-276	35.6667
HRGC3	AGAP1	0.637112	1.54662e-274	1.66303e-272	35.4028
HRGC3	ZFHX3	0.548256	1.79027e-273	1.90454e-271	35.3336
HRGC3	GALNT17	0.818027	1.51596e-264	1.5469e-262	34.7474
HRGC3	MYT1L	0.724895	2.20214e-264	2.22439e-262	34.7367
HRGC3	HS6ST3	0.552134	2.1823e-259	2.1823e-257	34.4042
HRGC3	MEG8	0.685765	2.40759e-257	2.36039e-255	34.2673
HRGC3	MTUS2	0.618994	4.30157e-245	4.09673e-243	33.4347
HRGC4	AKAP12	1.3829	0	0	43.9217
HRGC4	LINC00342	1.67607	0	0	39.4633
HRGC4	TRANK1	1.32929	2.21804e-197	6.41052e-196	29.9728
HRGC4	SYNE2	0.78374	3.50863e-167	7.61091e-166	27.5584
HRGC4	RAP1GAP2	0.608175	1.56953e-165	3.33942e-164	27.4203
HRGC4	PKD1	1.33959	1.70267e-164	3.57703e-163	27.3334
HRGC4	PCNT	1.92068	9.26734e-150	1.64314e-148	26.0643
HRGC4	AGAP1	0.191939	3.72843e-119	4.80468e-118	23.2086
HRGC4	KCNQ1OT1	0.594582	1.06887e-100	1.09853e-99	21.3028
HRGC4	KAZN	0.097161	4.96782e-99	5.01293e-98	21.1222
HRGC4	RBFOX3	0.889988	1.82195e-97	1.79679e-96	20.9514
HRGC4	MAP1B	0.347209	8.52553e-93	7.87214e-92	20.4329
HRGC4	KDM4B	1.14039	1.64684e-85	1.40276e-84	19.5968
HRGC4	LDLR	1.00264	3.24148e-75	2.41362e-74	18.351
HRGC4	AHNAK2	0.59029	7.13096e-72	5.07903e-71	17.928
HRGC4	PLEC	1.64857	2.02314e-70	1.41577e-69	17.741
HRGC4	CHD5	1.32478	4.69854e-68	3.18978e-67	17.4322
HRGC4	CCDC144A	0.944276	5.9884e-61	3.61837e-60	16.4704
HRGC4	RAB11FIP3	1.27193	2.34361e-57	1.34151e-56	15.9622
HRGC4	ZFYVE28	0.701638	3.02036e-50	1.51472e-49	14.9058
HRGC5	RORA	0.782248	0	0	40.5994
HRGC5	RORA-AS1	1.46951	0	0	39.9172
HRGC5	WDR73	2.04926	0	0	38.4352
HRGC5	HIF1A	1.518	0	0	38.3413
HRGC5	SNAP25-AS1	1.16459	8.09357e-305	6.74464e-302	37.3189
HRGC5	ARFGEF3	1.49657	1.42715e-302	1.09781e-299	37.1802
HRGC5	C1QTNF7	4.98808	3.1e-299	2.21429e-296	36.9731
HRGC5	AGAP1	0.871256	3.43301e-292	2.14563e-289	36.5321
HRGC5	AL049779.4	2.83969	3.17585e-291	1.86815e-288	36.4712
HRGC5	RAB11A	1.28997	1.82768e-287	1.01538e-284	36.2332
HRGC5	PGK1	1.29168	2.0319e-267	1.06942e-264	34.9371
HRGC5	SORBS1	0.929666	6.64287e-260	3.16327e-257	34.4387
HRGC5	AC098829.1	2.19884	1.03361e-256	4.6982e-254	34.2248
HRGC5	CC2D2A	2.13166	1.40744e-251	5.86433e-249	33.8779
HRGC5	FAM184B	2.48051	5.85519e-236	2.16859e-233	32.8002
HRGC5	CREB5	2.33509	3.31656e-222	1.10552e-219	31.821
HRGC5	AC012404.1	1.16858	3.82472e-217	1.15901e-214	31.453
HRGC5	AC009623.1	3.52434	2.37196e-215	6.97635e-213	31.3216
HRGC5	CARS	1.57732	2.27708e-204	5.6927e-202	30.5044
HRGC5	PDE5A	1.09905	1.2901e-200	2.93204e-198	30.2201
HRGC6	DGKI	2.2732	0	0	46.3475
HRGC6	KCNQ5	5.24094	0	0	45.4469
HRGC6	C8orf34	5.23355	0	0	45.2309
HRGC6	SLIT2	4.20002	0	0	44.6928
HRGC6	RELN	3.36441	0	0	43.9491
HRGC6	PTPRM	2.44398	0	0	42.9811
HRGC6	PARD3	4.33232	0	0	42.9542
HRGC6	MCC	3.501	0	0	42.7373
HRGC6	PLCL1	4.80761	0	0	42.3377
HRGC6	SORCS3	5.0866	0	0	41.8972
HRGC6	GALNT14	3.65817	0	0	41.665
HRGC6	GPC6	5.64852	0	0	41.6042
HRGC6	CADPS	1.77401	0	0	41.2948
HRGC6	SNTG1	2.35096	0	0	40.8288
HRGC6	LRRTM4	5.25314	0	0	40.2348
HRGC6	FHOD3	3.02726	0	0	40.0914
HRGC6	SDK1	2.35297	0	0	39.8706
HRGC6	CDH4	3.99008	0	0	39.706
HRGC6	LHFPL6	3.93803	0	0	38.9808
HRGC6	KCNIP1	5.18891	0	0	38.9098
HRGC7	GPC6	6.24528	0	0	44.4366
HRGC7	SLIT2	4.69987	0	0	43.4492
HRGC7	CDH8	8.01723	0	0	41.4789
HRGC7	ZNF385B	4.5796	0	0	40.3075
HRGC7	LRRTM4	5.71331	0	0	39.9083
HRGC7	ARPP21	8.7888	0	0	39.5433
HRGC7	KCNB2	6.0666	0	0	39.3736
HRGC7	NAV3	4.49556	0	0	38.6557
HRGC7	CACNA1C	2.38199	0	0	38.0009
HRGC7	CNTN5	2.5802	1.00529e-300	5.58493e-298	37.0656
HRGC7	SYNPR	5.06831	3.4987e-291	1.66605e-288	36.4685
HRGC7	SLC6A1	4.18548	1.21298e-282	5.27384e-280	35.9257
HRGC7	LHFPL6	3.87179	1.9012e-270	7.92167e-268	35.136
HRGC7	COL4A2	3.00273	2.03875e-259	8.15501e-257	34.4062
HRGC7	LRRTM3	4.70806	4.34407e-253	1.6708e-250	33.9804
HRGC7	ADRA1A	3.8186	4.38949e-252	1.62574e-249	33.9123
HRGC7	PRR16	3.65063	5.01824e-242	1.73043e-239	33.223
HRGC7	IGFBP5	5.84663	1.74027e-240	5.80091e-238	33.1161
HRGC7	ST6GALNAC3	2.75072	1.54146e-235	4.81707e-233	32.7707
HRGC7	NR2F2-AS1	3.76631	1.50252e-234	4.55309e-232	32.7012
HRGC8	NRXN3	1.38889	2.09942e-245	2.09942e-241	33.4561
HRGC8	CADPS	1.41505	6.24997e-154	3.12498e-150	26.4297
HRGC8	PLCB4	1.88483	1.13613e-141	3.78711e-138	25.3408
HRGC8	TCF4	3.23102	9.03056e-123	2.25764e-119	23.564
HRGC8	GRID2	4.75697	2.29062e-114	4.58124e-111	22.7295
HRGC8	CA10	2.22443	5.67134e-107	9.45223e-104	21.9692
HRGC8	GABRB3	1.25645	1.41286e-105	2.01837e-102	21.8227
HRGC8	ZNF385B	3.50011	8.84591e-101	1.10574e-97	21.3117
HRGC8	GRM7	4.5663	3.04471e-100	3.38301e-97	21.2537
HRGC8	NCKAP5	4.98746	9.24332e-100	9.24332e-97	21.2015
HRGC8	TMTC2	1.77519	6.59504e-96	5.49586e-93	20.7798
HRGC8	CDH20	3.99888	1.62207e-86	1.24775e-83	19.7144
HRGC8	AUTS2	0.912117	2.23742e-84	1.59815e-81	19.4635
HRGC8	NLK	1.33612	1.60711e-79	1.07141e-76	18.8819
HRGC8	FAM169A	1.24637	1.73489e-78	1.08431e-75	18.7558
HRGC8	DAPK1	5.44445	6.91934e-78	4.0702e-75	18.6821
HRGC8	ZNF536	1.77972	1.77265e-77	9.84803e-75	18.6319
HRGC8	DLG2	1.12252	2.35595e-77	1.23997e-74	18.6166
HRGC8	CTBP2	2.11569	1.71893e-76	8.1854e-74	18.5099
HRGC8	SIPA1L3	1.79423	7.96794e-76	3.62179e-73	18.4271
HRGC9	CREB5	3.32618	5.12467e-172	1.02493e-168	27.959
HRGC9	FNIP2	3.07041	9.1341e-172	1.52235e-168	27.9383
HRGC9	HOMER1	2.97195	1.22673e-149	1.75248e-146	26.0535
HRGC9	NEDD4L	1.31001	5.83974e-143	6.4886e-140	25.4574
HRGC9	CFAP61	2.89498	8.75715e-139	8.75715e-136	25.0775
HRGC9	MAP7	1.65031	2.29767e-129	1.91473e-126	24.1987
HRGC9	MARCH1	1.93876	6.72106e-128	5.17004e-125	24.059
HRGC9	PRUNE2	0.966329	3.88059e-127	2.77185e-124	23.9861
HRGC9	GAP43	3.25707	2.44846e-125	1.63231e-122	23.813
HRGC9	BACH2	1.82271	9.59008e-120	5.64123e-117	23.2669
HRGC9	ELL2	4.49141	1.31087e-117	7.28262e-115	23.055
HRGC9	PPM1E	1.60693	3.6849e-109	1.75471e-106	22.1968
HRGC9	NREP	2.43501	6.18263e-107	2.81029e-104	21.9653
HRGC9	KCNMA1	1.37976	4.72724e-106	2.05532e-103	21.8727
HRGC9	FSTL5	1.89534	7.44707e-103	2.86426e-100	21.5342
HRGC9	EIF2AK3	2.86784	2.92073e-100	1.04312e-97	21.2557
HRGC9	ARHGAP10	4.63826	1.31575e-98	4.38585e-96	21.0762
HRGC9	HS3ST2	2.65557	3.12921e-97	9.77877e-95	20.9256
HRGC9	STARD4-AS1	1.9658	2.06804e-95	5.74455e-93	20.7248
HRGC9	MAP2	1.36437	4.80368e-94	1.29829e-91	20.5729
HRGC10	KIRREL3	7.71753	2.59871e-216	8.66237e-213	31.392
HRGC10	RIMS1	3.11932	2.20944e-202	3.6824e-199	30.3542
HRGC10	PCDH15	4.20636	5.73215e-200	8.18878e-197	30.1708
HRGC10	ASIC2	3.68298	7.48859e-200	9.36073e-197	30.1619
HRGC10	POU6F2	2.33911	3.18835e-199	3.54261e-196	30.1139
HRGC10	PPFIBP1	7.20659	1.61873e-196	1.61873e-193	29.9065
HRGC10	RASGRP1	3.34565	3.38728e-178	2.6056e-175	28.4628
HRGC10	FAT3	2.45768	1.55418e-177	1.11013e-174	28.4093
HRGC10	DMD	4.84321	1.22888e-176	8.19255e-174	28.3365
HRGC10	DACH1	2.15933	7.1689e-172	4.48056e-169	27.947
HRGC10	RASGEF1B	2.56451	2.03315e-162	9.68169e-160	27.1581
HRGC10	KIAA1217	4.65519	7.61843e-159	3.46292e-156	26.8538
HRGC10	CLSTN2	2.15945	7.50105e-153	2.88502e-150	26.3356
HRGC10	LRRTM4	5.43222	2.77032e-152	9.89402e-150	26.286
HRGC10	PDE4D	1.78174	2.53013e-147	8.43378e-145	25.8485
HRGC10	CACNA1C	2.10701	4.24706e-145	1.32721e-142	25.6498
HRGC10	PAK3	4.20101	5.57488e-145	1.65844e-142	25.6392
HRGC10	CPNE8	4.70833	1.22534e-140	3.50098e-138	25.2469
HRGC10	DCLK1	1.99845	6.9006e-140	1.91683e-137	25.1784
HRGC10	PLCH1	5.0595	1.87059e-139	5.05565e-137	25.1389
HRGC11	TSHZ2	7.1028	3.80619e-193	1.26873e-189	29.6461
HRGC11	ASIC2	3.92613	2.02109e-192	5.05273e-189	29.5898
HRGC11	DSCAML1	4.41786	1.69102e-164	2.11378e-161	27.3336
HRGC11	CSMD3	2.5837	1.4733e-161	1.637e-158	27.0851
HRGC11	NRG3	1.45928	1.2678e-158	1.2678e-155	26.8348
HRGC11	KCNH8	4.06291	9.7522e-154	8.12684e-151	26.4129
HRGC11	PARD3	4.48256	1.2651e-152	9.73154e-150	26.3158
HRGC11	MDGA2	1.34087	8.38046e-148	5.98604e-145	25.8911
HRGC11	RGS6	2.69551	1.26018e-147	8.40121e-145	25.8754
HRGC11	TRPM3	2.5733	1.55755e-147	9.7347e-145	25.8672
HRGC11	FGF14	1.94987	3.72238e-145	2.18963e-142	25.655
HRGC11	PDE4D	1.84939	4.31712e-143	2.27217e-140	25.4693
HRGC11	ATRNL1	1.30318	7.73806e-138	3.68479e-135	24.9906
HRGC11	MEIS2	2.71596	1.73009e-132	7.52214e-130	24.4936
HRGC11	NR2F2-AS1	4.14247	6.48267e-130	2.70111e-127	24.2508
HRGC11	CA10	2.74777	6.08828e-127	2.43531e-124	23.9674
HRGC11	SHANK2	2.69149	4.0069e-126	1.54112e-123	23.8888
HRGC11	SNTG1	2.32922	4.86018e-126	1.80007e-123	23.8807
HRGC11	ADCY2	3.15742	2.41874e-125	8.63834e-123	23.8135
HRGC11	KCNIP1	5.70817	5.95304e-124	2.05277e-121	23.6789
HRGC12	GPC6	6.26264	3.86379e-156	9.65949e-153	26.6211
HRGC12	GRM7	6.44929	1.57916e-140	1.97395e-137	25.2369
HRGC12	GABRG3	5.68947	1.22586e-132	1.36207e-129	24.5076
HRGC12	TRPM3	2.6438	8.28541e-130	7.53219e-127	24.2407
HRGC12	PDE4D	1.9225	1.00686e-125	8.39047e-123	23.8502
HRGC12	SYT1	1.21393	6.43767e-124	4.29178e-121	23.6756
HRGC12	FGF14	1.90059	3.73961e-121	2.19977e-118	23.4057
HRGC12	KCNH8	3.51307	4.72912e-109	2.38088e-106	22.1856
HRGC12	CDH4	4.27817	6.2752e-104	2.72835e-101	21.6485
HRGC12	CA10	2.70853	1.98756e-103	7.95023e-101	21.5953
HRGC12	NCALD	4.32221	4.573e-102	1.75885e-99	21.4499
HRGC12	RGS7	1.36744	1.00218e-101	3.5792e-99	21.4134
HRGC12	AL356124.1	4.21111	7.16425e-101	2.47043e-98	21.3216
HRGC12	KCNQ5	5.06033	3.21715e-98	1.03779e-95	21.0338
HRGC12	RPH3A	6.0195	6.21945e-97	1.88468e-94	20.8928
HRGC12	ARHGAP18	3.35525	1.33188e-95	3.91728e-93	20.746
HRGC12	KCTD16	1.77592	4.00037e-95	1.11121e-92	20.6931
HRGC12	RELN	3.37351	1.35782e-94	3.66979e-92	20.6341
HRGC12	SORCS3	4.44553	1.84413e-91	4.61033e-89	20.2823
HRGC12	HECW1	2.29525	3.16471e-90	7.71881e-88	20.142
HRGC13	KAZN	0.807081	1.23721e-50	2.06202e-48	14.9653
HRGC13	CDH4	4.62753	3.65767e-48	5.15165e-46	14.582
HRGC13	RBFOX3	1.70476	2.20267e-36	1.61961e-34	12.5967
HRGC13	PKD1	1.98853	1.0871e-35	7.70993e-34	12.4701
HRGC13	LINC00342	1.87367	1.13761e-35	8.01134e-34	12.4665
HRGC13	CAMK1D	1.41519	2.55321e-34	1.60579e-32	12.216
HRGC13	AKAP12	1.29601	1.73485e-33	1.05142e-31	12.0592
HRGC13	SDK1	1.93634	2.45373e-32	1.3708e-30	11.839
HRGC13	SLIT2	3.19193	1.45939e-29	7.01632e-28	11.2907
HRGC13	GRIN2A	1.07477	1.25224e-27	5.35147e-26	10.8925
HRGC13	NEFM	1.284	8.86146e-27	3.51645e-25	10.7128
HRGC13	C8orf34	4.1889	2.93332e-26	1.11959e-24	10.6015
HRGC13	PLCL1	4.07304	1.51389e-25	5.5454e-24	10.4469
HRGC13	KCNQ1OT1	1.10574	7.12567e-25	2.46563e-23	10.2989
HRGC13	DLGAP2	2.20798	5.08803e-24	1.63602e-22	10.1081
HRGC13	CHD5	2.05055	5.73892e-24	1.82768e-22	10.0963
HRGC13	GSE1	2.31967	5.49145e-23	1.56899e-21	9.87226
HRGC13	DGKI	1.07803	4.57199e-20	1.02511e-18	9.17367
HRGC13	PARD3	3.33642	6.19464e-20	1.36146e-18	9.14088
HRGC13	KCNIP1	4.52851	1.43471e-18	2.80765e-17	8.79467
HRGC14	DGKI	2.86099	4.28583e-77	4.28583e-73	18.5845
HRGC14	C8orf34	5.4865	3.60777e-75	1.80388e-71	18.3452
HRGC14	PLCL1	5.42408	3.08201e-74	1.02734e-70	18.2282
HRGC14	SDK1	3.23596	2.11774e-73	5.29435e-70	18.1225
HRGC14	SLIT2	4.63659	2.4413e-72	4.88261e-69	17.9875
HRGC14	CDH4	4.84548	1.73803e-69	2.89672e-66	17.6197
HRGC14	SORCS3	5.81366	2.25069e-69	3.21527e-66	17.6051
HRGC14	LHFPL6	4.72248	7.93553e-69	9.91941e-66	17.5336
HRGC14	SNTG1	3.05853	1.48714e-68	1.48714e-65	17.4979
HRGC14	KCNQ5	5.36842	3.61899e-66	3.15495e-63	17.182
HRGC14	PTPRM	2.84517	3.78594e-66	3.15495e-63	17.1794
HRGC14	KAZN	1.33731	6.4905e-66	4.99269e-63	17.1481
HRGC14	PARD3	4.64948	1.04332e-65	7.45231e-63	17.1205
HRGC14	MCC	3.78085	6.43783e-65	4.29189e-62	17.0143
HRGC14	KCNIP1	5.60277	7.86584e-65	4.91615e-62	17.0025
HRGC14	ADGRB3	2.03247	1.33447e-62	7.84981e-60	16.6989
HRGC14	LRRTM4	5.49024	1.25444e-61	6.96909e-59	16.5647
HRGC14	GRIN2A	2.08286	2.38506e-61	1.25529e-58	16.526
HRGC14	GALNT14	4.03217	7.89753e-61	3.94876e-58	16.4536
HRGC14	FHOD3	3.37993	8.3751e-60	3.80686e-57	16.31
HRGC15	CACNA1C	3.58719	5.21172e-22	2.78973e-18	9.644
HRGC15	NEAT1	1.86558	5.57946e-22	2.78973e-18	9.637
HRGC15	AGAP1	2.2123	1.85494e-21	6.18314e-18	9.51286
HRGC15	KAZN	1.31233	4.24338e-16	3.53615e-13	8.13141
HRGC15	GPC6	5.2785	1.07221e-15	6.70129e-13	8.0183
HRGC15	SIPA1L3	3.76465	1.39953e-15	8.23255e-13	7.9855
HRGC15	CUX2	3.51328	5.54403e-15	3.08002e-12	7.81391
HRGC15	SLIT2	4.01012	1.23806e-13	4.42165e-11	7.41264
HRGC15	GSE1	3.26008	1.61173e-13	5.36216e-11	7.3776
HRGC15	SORCS2	5.90128	2.24772e-13	7.02411e-11	7.33317
HRGC15	MYT1L	1.62608	6.41125e-13	1.88566e-10	7.19144
HRGC15	FSTL4	2.41658	8.37935e-13	2.3941e-10	7.1548
HRGC15	CDH8	6.59643	1.14858e-12	3.19049e-10	7.11142
HRGC15	ZNF385B	4.10412	3.8123e-12	8.86582e-10	6.94397
HRGC15	KCNQ1OT1	1.90035	5.83812e-12	1.32685e-09	6.88354
HRGC15	KDM4B	2.22318	1.31895e-11	2.93101e-09	6.76654
HRGC15	CHD5	2.36532	1.35051e-11	2.9359e-09	6.76312
HRGC15	TMEM132B	3.0211	1.39106e-11	2.94524e-09	6.75883
HRGC15	PDE9A	2.7837	1.52413e-11	3.11046e-09	6.74558
HRGC15	SDK1	2.06316	2.16266e-11	4.32531e-09	6.6946

## Sheet: RGC_note
Note:
1. Kcng4 is alpha RGC marker in mice.
2. Cross-mapping
2.1 Cross-mapping between 12 Sanes public labeling (scRNA-seq) and 15 snRNA-seq clusters
2.1.1 Reference: Yan et al. (2020). https://doi.org/10.1038/s41598-020-66092-9
	cluster	Unassigned	scRNA_MG-OFF	scRNA_MG-ON	scRNA_PG-OFF	scRNA_PG-ON	scRNA_hRGC10	scRNA_hRGC12	scRNA_hRGC5	scRNA_hRGC6	scRNA_hRGC7	scRNA_hRGC8	scRNA_hRGC9	annotation
	HRGC1	4	1988	0	0	0	0	0	0	0	0	0	0	99.8%scRNA_MG-OFF
	HRGC2	17	0	1979	0	0	0	0	0	0	0	0	0	99.1%scRNA_MG-ON
	HRGC3	531	1259	194	0	0	0	0	0	0	0	2	0	63.4%scRNA_MG-OFF+26.7%Unassigned
	HRGC4	1588	0	344	0	21	0	0	14	0	7	25	0	79.4%Unassigned+17.2%scRNA_MG-ON
	HRGC5	431	739	350	0	0	0	1	0	0	0	0	0	48.6%scRNA_MG-OFF+28.3%Unassigned+23.0%scRNA_MG-ON
	HRGC6	16	0	0	972	0	0	0	0	0	0	0	0	98.4%scRNA_PG-OFF
	HRGC7	5	0	0	0	807	0	0	0	0	0	0	0	99.4%scRNA_PG-ON
	HRGC8	552	8	0	2	0	0	3	11	0	25	36	16	84.5%Unassigned
	HRGC9	70	3	0	1	0	0	4	394	0	0	0	0	83.5%scRNA_hRGC5+14.8%Unassigned
	HRGC10	99	0	0	0	0	0	7	340	0	0	1	0	76.1%scRNA_hRGC5+22.1%Unassigned
	HRGC11	347	0	0	2	0	1	0	9	4	13	7	7	89.0%Unassigned
	HRGC12	246	0	0	2	1	13	0	24	2	1	43	0	74.1%Unassigned+13.0%scRNA_hRGC8
	HRGC13	11	0	0	204	0	0	0	0	0	0	0	1	94.4%scRNA_PG-OFF
	HRGC14	11	0	0	113	0	0	0	0	0	0	0	0	91.1%scRNA_PG-OFF
	HRGC15	1	0	0	0	31	0	0	0	0	0	0	1	93.9%scRNA_PG-ON
2.2 Mapping matrix between 15 clusters and 18 public macaque labeling
	cluster	Unassigned	macaque_MG_OFF	macaque_MG_ON	macaque_PG_OFF	macaque_PG_ON	macaque_RGC10	macaque_RGC12	macaque_RGC13	macaque_RGC14	macaque_RGC15	macaque_RGC16	macaque_RGC17	macaque_RGC18	macaque_RGC5	macaque_RGC6	macaque_RGC7	macaque_RGC9	annotation
	HRGC1	32	1960	0	0	0	0	0	0	0	0	0	0	0	0	0	0	0	98.4%macaque_MG_OFF
	HRGC2	76	0	1920	0	0	0	0	0	0	0	0	0	0	0	0	0	0	96.2%macaque_MG_ON
	HRGC3	1751	230	0	3	1	0	0	0	0	0	0	0	1	0	0	0	0	88.2%Unassigned+11.6%macaque_MG_OFF
	HRGC4	661	24	4	2	0	2	0	186	0	0	0	0	0	0	0	0	1120	56.0%macaque_RGC9+33.1%Unassigned
	HRGC5	155	3	3	0	0	3	1356	0	0	0	0	0	0	1	0	0	0	89.2%macaque_RGC12+10.2%Unassigned
	HRGC6	255	0	210	54	0	0	0	0	0	0	0	469	0	0	0	0	0	47.5%macaque_RGC17+25.8%Unassigned+21.3%macaque_MG_ON
	HRGC7	440	0	5	0	17	0	10	3	0	0	336	1	0	0	0	0	0	54.2%Unassigned+41.4%macaque_RGC16
	HRGC8	636	0	0	0	0	5	0	0	11	0	1	0	0	0	0	0	0	97.4%Unassigned
	HRGC9	138	0	334	0	0	0	0	0	0	0	0	0	0	0	0	0	0	70.8%macaque_MG_ON+29.2%Unassigned
	HRGC10	60	0	0	0	0	0	2	0	0	375	0	0	1	8	0	1	0	83.9%macaque_RGC15+13.4%Unassigned
	HRGC11	321	0	0	0	0	0	62	0	0	4	0	1	0	1	1	0	0	82.3%Unassigned+15.9%macaque_RGC12
	HRGC12	215	0	1	5	0	45	3	7	17	0	3	0	0	0	36	0	0	64.8%Unassigned+13.6%macaque_RGC10+10.8%macaque_RGC6
	HRGC13	43	0	0	166	0	5	0	0	1	1	0	0	0	0	0	0	0	76.9%macaque_PG_OFF+19.9%Unassigned
	HRGC14	3	0	0	121	0	0	0	0	0	0	0	0	0	0	0	0	0	97.6%macaque_PG_OFF
	HRGC15	16	0	0	0	11	0	0	0	0	0	6	0	0	0	0	0	0	48.5%Unassigned+33.3%macaque_PG_ON+18.2%macaque_RGC16
2.3 Mapping matrix between 15 clusters and 45 public macaque labeling
	cluster	Unassigned	mouse_10_Novel	mouse_12_ooDS_NT	mouse_13_Novel	mouse_15_Novel	mouse_16_ooDS_DV	mouse_17_Tbr1_S1	mouse_1_W3D1.1	mouse_20_Novel	mouse_21_Tbr1_S2	mouse_22_M5	mouse_23_W3D2	mouse_24_Novel	mouse_25_Novel	mouse_26_Novel	mouse_27_Novel	mouse_28_FmidiOFF	mouse_29_Novel	mouse_32_F_Novel	mouse_33_M1	mouse_34_Novel	mouse_35_Novel	mouse_39_Novel	mouse_3_FminiON	mouse_42_AlphaOFFS	mouse_7_Novemouse_9_Tbr1_Novel	annotation
	HRGC1	974	0	0	0	0	0	35	0	0	352	0	0	3	0	0	628	0	0	0	0	0	0	0	0	0	0	0	48.9%Unassigned+31.5%mouse_27_Novel+17.7%mouse_21_Tbr1_S2
	HRGC2	223	1743	0	0	0	0	30	0	0	0	0	0	0	0	0	0	0	0	0	0	0	0	0	0	0	0	0	87.3%mouse_10_Novel+11.2%Unassigned
	HRGC3	2	0	0	0	0	0	1984	0	0	0	0	0	0	0	0	0	0	0	0	0	0	0	0	0	0	0	0	99.9%mouse_17_Tbr1_S1
	HRGC4	100	0	0	0	0	0	10	0	0	0	0	1889	0	0	0	0	0	0	0	0	0	0	0	0	0	0	0	94.5%mouse_23_W3D2
	HRGC5	4	0	0	0	0	1517	0	0	0	0	0	0	0	0	0	0	0	0	0	0	0	0	0	0	0	0	0	99.7%mouse_16_ooDS_DV
	HRGC6	148	0	0	0	733	0	0	0	0	0	0	0	0	0	0	0	0	0	0	0	0	0	0	107	0	0	0	74.2%mouse_15_Novel+15.0%Unassigned+10.8%mouse_3_FminiON
	HRGC7	3	0	809	0	0	0	0	0	0	0	0	0	0	0	0	0	0	0	0	0	0	0	0	0	0	0	0	99.6%mouse_12_ooDS_NT
	HRGC8	287	0	0	0	0	0	0	0	0	0	136	0	0	0	0	0	0	0	0	0	0	0	0	0	0	0	230	44.0%Unassigned+35.2%mouse_9_Tbr1_Novel+20.8%mouse_22_M5
	HRGC9	22	0	1	449	0	0	0	0	0	0	0	0	0	0	0	0	0	0	0	0	0	0	0	0	0	0	0	95.1%mouse_13_Novel
	HRGC10	7	0	0	0	0	0	0	0	0	0	0	0	0	0	0	0	0	0	0	1	0	0	0	0	0	439	0	98.2%mouse_7_Novel
	HRGC11	54	0	0	0	0	0	0	0	205	0	0	0	0	29	1	0	54	45	0	0	0	2	0	0	0	0	0	52.6%mouse_20_Novel+13.8%Unassigned+13.8%mouse_28_FmidiOFF+11.5%mouse_29_Novel
	HRGC12	135	0	0	0	0	0	0	143	0	0	0	0	0	0	0	0	0	4	0	0	0	50	0	0	0	0	0	43.1%mouse_1_W3D1.1+40.7%Unassigned+15.1%mouse_35_Novel
	HRGC13	32	0	0	0	0	0	1	0	0	0	0	0	0	0	0	0	0	0	1	0	179	0	0	0	3	0	0	82.9%mouse_34_Novel+14.8%Unassigned
	HRGC14	90	0	0	0	4	0	1	0	0	0	0	0	0	0	0	0	0	0	0	0	2	0	1	1	25	0	0	72.6%Unassigned+20.2%mouse_42_AlphaOFFS
	HRGC15	14	0	4	0	0	0	0	0	0	0	0	0	0	0	1	0	0	0	0	0	0	0	14	0	0	0	0	42.4%Unassigned+42.4%mouse_39_Novel+12.1%mouse_12_ooDS_NT
2.4 Mapping matrix between 15 clusters and 21 orthogonal RGC types
2.4.1 Reference: https://doi.org/10.1101/2023.04.07.536039
	cluster	Unassigned	nShekhar_MG_OFF	nShekhar_MG_ON	nShekhar_PG_OFF	nShekhar_PG_ON	nShekhar_RGC10	nShekhar_RGC11	nShekhar_RGC12	nShekhar_RGC13	nShekhar_RGC14	nShekhar_RGC19	nShekhar_RGC20	nShekhar_RGC4	nShekhar_RGC5	nShekhar_RGC6	nShekhar_RGC7	nShekhar_RGC8	nShekhar_RGC9	annotation
	HRGC1	42	1950	0	0	0	0	0	0	0	0	0	0	0	0	0	0	0	0	97.9%nShekhar_MG_OFF
	HRGC2	22	0	1974	0	0	0	0	0	0	0	0	0	0	0	0	0	0	0	98.9%nShekhar_MG_ON
	HRGC3	191	1378	413	0	0	3	0	0	1	0	0	0	0	0	0	0	0	0	69.4%nShekhar_MG_OFF+20.8%nShekhar_MG_ON
	HRGC4	1671	16	174	0	0	6	0	0	0	0	0	0	132	0	0	0	0	0	83.6%Unassigned
	HRGC5	169	917	435	0	0	0	0	0	0	0	0	0	0	0	0	0	0	0	60.3%nShekhar_MG_OFF+28.6%nShekhar_MG_ON+11.1%Unassigned
	HRGC6	3	0	0	985	0	0	0	0	0	0	0	0	0	0	0	0	0	0	99.7%nShekhar_PG_OFF
	HRGC7	9	0	0	0	803	0	0	0	0	0	0	0	0	0	0	0	0	0	98.9%nShekhar_PG_ON
	HRGC8	604	0	0	0	0	2	46	0	0	0	0	1	0	0	0	0	0	0	92.5%Unassigned
	HRGC9	392	0	0	0	66	1	0	1	0	0	0	0	0	5	4	0	3	0	83.1%Unassigned+14.0%nShekhar_PG_ON
	HRGC10	74	0	0	0	0	0	0	1	6	0	0	0	0	0	366	0	0	0	81.9%nShekhar_RGC6+16.6%Unassigned
	HRGC11	55	0	0	0	0	0	0	0	0	0	0	0	0	332	0	3	0	0	85.1%nShekhar_RGC5+14.1%Unassigned
	HRGC12	251	0	0	0	0	0	0	4	0	0	0	0	0	0	1	35	0	41	75.6%Unassigned+12.3%nShekhar_RGC9+10.5%nShekhar_RGC7
	HRGC13	2	0	0	3	0	0	0	0	0	0	0	0	210	0	0	0	0	1	97.2%nShekhar_RGC4
	HRGC14	19	0	0	85	0	0	0	0	0	0	0	0	20	0	0	0	0	0	68.5%nShekhar_PG_OFF+16.1%nShekhar_RGC4+15.3%Unassigned
	HRGC15	17	0	0	0	10	0	0	0	0	2	1	0	2	1	0	0	0	0	51.5%Unassigned+30.3%nShekhar_PG_ON
