# Supplementary material for: Integrated multi-omics single cell atlas of the human retina
Source: Research Square preprint supplement (doi:10.21203/rs.3.rs-3471275/v1), 2023-11-16
Supplement: Supplementary file 9 [file 6880ca1ee842e27de406a3fe.xlsx]

## Sheet: AC age sign -log10P 
Table S16. Results of differential gene expression by sliding window analysis (signed -log10(p-value))
	X20	X30	X40	X50	X60	X70	X80	X90
A1BG	0.245576	2.94264	1.06441	NA	0.773533	0.0640973	-0.647512	0.0575259
A1BG.AS1	0.317476	0.300646	0.0528497	NA	-1.67456	0.276673	0.298814	-0.137341
A1CF	0.0169755	0.937677	0.022505	NA	-0.879173	-0.757885	-0.226924	-0.0801962
A2M	0.041269	1.7325	0.555711	NA	-0.83617	-0.149588	0.052026	0.411215
A2M.AS1	-0.243962	0.98173	0.588689	NA	0.433217	0.67231	-0.022273	0.304313
A2ML1	-0.036698	2.21493	1.39364	NA	-0.880708	0.792054	1.04995	0.469692
A2ML1.AS1	0.105002	2.73582	0.77608	NA	-2.25138	0.179617	1.71042	0.517993
AAAS	-0.210289	-1.56268	-0.784035	NA	-0.328489	1.87761	0.356164	-0.28725
AACS	-3.55327	-0.0366596	1.04089	NA	-0.718923	-0.604735	0.0849863	-0.716806
AADAT	-0.616837	0.0646584	-0.0603158	NA	-0.230409	0.0329699	0.156784	0.123465
AAGAB	-0.198942	0.0491084	0.214929	NA	-0.877023	-0.177418	1.26973	-0.0224321
AAK1	-0.23072	-3.55304	-1.08087	NA	0.719356	0.0234769	0.0464949	-0.0323417
AAMDC	-0.00237023	-0.436875	-1.45544	NA	-0.0514432	-2.16681	-0.528681	-0.00313919
AAMP	2.09787	1.15441	0.358367	NA	0.78607	-0.00358916	-2.83617	-0.702308
AANAT	0.290272	0.468258	0.0726696	NA	-0.795711	0.23199	0.356783	0.276155
AAR2	-0.226489	-1.23266	-0.127362	NA	0.134345	0.0861019	-0.0898182	-0.0928799
AARS	0.714599	-0.290121	-0.598997	NA	1.77139	0.0230188	-0.859865	-0.618071
AARS2	-0.530635	-0.679209	-0.60877	NA	0.184008	1.68279	0.537131	0.286168
AARSD1	0.180671	1.17728	0.0805883	NA	-2.31384	0.63508	2.35158	-0.0462662
AASDH	0.158381	-0.0190162	0.343278	NA	0.0114245	0.813097	-0.0972048	-0.175281
AASDHPPT	0.400761	-1.09941	-0.68163	NA	4.77267	-0.513331	-3.72638	-1.03121
AASS	-0.281561	-0.199563	-0.640779	NA	0.00592609	-0.462686	0.652272	0.265176
AATF	-0.526367	-0.322465	0.107796	NA	-2.55443	0.88535	0.73159	-0.130325
AATK	-0.744348	-1.30588	-0.300703	NA	-0.223194	0.399206	1.6898	0.820613
ABAT	-1.9109	-0.272073	-0.12758	NA	1.31768	0.510601	0.300893	0.0668314
ABCA10	-0.205644	0.499416	0.0651074	NA	-1.06301	0.295515	0.846159	0.355612
ABCA12	-0.221406	0.307307	0.0429507	NA	-0.616934	1.32192	2.89097	0.0267178
ABCA13	-1.52935	0.483745	0.529744	NA	-0.461437	0.50072	0.132431	0.352412
ABCA2	-0.0905133	0.133007	-0.139315	NA	-0.305156	0.598164	1.02213	0.44769
ABCA3	-0.174999	1.58355	0.579652	NA	-1.20486	1.56443	2.63219	0.512995
ABCA4	-0.751998	0.0869072	-0.0243739	NA	-0.37395	0.296619	0.143856	-0.324449
ABCA5	-0.151505	-1.13058	-0.720223	NA	0.128354	-0.808308	0.633605	-0.303259
ABCA6	-0.185647	0.154753	0.361579	NA	-1.90457	-0.151537	2.65132	0.491917
ABCA7	-0.481285	0.0068708	-0.233143	NA	-1.73439	0.296871	1.45371	-0.263334
ABCA8	-0.121658	1.95039	0.620577	NA	0.671149	-0.238775	-0.216247	1.02527
ABCA9	-0.126289	-0.507731	0.0404153	NA	-1.11133	-0.169794	1.75623	0.184005
ABCA9.AS1	0.171555	1.88142	1.08545	NA	-2.8739	-0.0987752	1.9712	0.390007
ABCB1	0.0416921	1.54476	0.548121	NA	-2.3575	0.474402	0.372557	0.11313
ABCB10	0.219947	2.35672	0.08044	NA	-1.62772	0.0170991	0.87852	-0.0735855
ABCB11	-0.100377	0.704306	-0.00573967	NA	-1.28589	-0.5541	-0.263224	0.0343965
ABCB4	0.0252375	2.03559	0.11578	NA	0.137959	-0.860827	-0.0693206	0.26922
ABCB6	-0.0724005	-0.102539	-0.1084	NA	-0.574156	0.555598	0.191331	-0.498855
ABCB7	-0.262448	1.60934	0.628359	NA	-1.08321	-0.316292	0.671808	-0.0551477
ABCB8	0.449239	4.14685	0.582158	NA	-2.15894	0.275255	0.713353	0.363049
ABCB9	-0.842502	-0.110412	-0.0922842	NA	-0.388064	0.31317	3.797	-0.0149079
ABCC1	-2.12831	-0.167415	1.48423	NA	-0.994282	0.646646	3.94138	0.384446
ABCC10	-0.0452498	2.07087	0.665569	NA	-3.19308	0.925328	0.93433	0.177958
ABCC11	-0.0872082	0.0443832	0.333791	NA	-1.0195	0.033663	0.639337	0.23188
ABCC2	-0.313674	-0.836865	-0.871149	NA	-0.225318	0.517543	0.227468	-0.0166759
ABCC3	-0.0773814	-0.252135	-0.217765	NA	-0.851486	0.0894044	0.438782	-0.0875807
ABCC4	0.101979	-0.0319233	0.576196	NA	-0.277708	-2.35734	-1.24139	0.483184
ABCC5	-0.461858	-0.310053	-0.0766416	NA	-4.4939	0.604597	1.79703	-0.755978
ABCC6	1.46256	0.200311	0.0996584	NA	0.0451405	-0.0495611	0.110528	0.952031
ABCC8	-0.585536	-0.186815	-0.0784464	NA	-0.219445	1.0611	0.169614	0.565717
ABCD1	-0.271352	0.182757	0.0273351	NA	0.0537241	0.25072	-0.226308	-0.0331832
ABCD2	0.47253	-0.925791	-0.512013	NA	0.312621	-0.356208	0.02705	-0.132306
ABCD3	-0.214533	-0.657177	-0.165156	NA	-0.0527464	0.736485	-0.0984687	-0.0424295
ABCD4	-0.267527	0.251933	0.226988	NA	0.364936	-0.235672	0.515042	-0.394007
ABCE1	0.33482	-2.86481	-1.4698	NA	0.0492841	-0.0553773	-1.20828	-1.77453
ABCF1	0.374657	-0.426999	-0.19805	NA	-0.521629	0.267146	-0.156165	-0.464686
ABCF2	0.977262	0.110249	-0.0644027	NA	0.0475558	0.308828	-0.434766	-0.338454
ABCF3	0.697874	0.814566	0.0586551	NA	0.200614	1.21507	0.0829711	-0.112393
ABCG1	-0.0352103	-1.1056	-0.769805	NA	0.116367	0.0769724	0.331524	1.82343
ABCG4	-0.35228	0.206213	0.020408	NA	0.211854	0.86118	-0.190542	-0.307957
ABCG5	0.368102	3.03942	0.170828	NA	0.17066	0.31013	0.59953	0.467606
ABHD1	-0.16806	1.1586	0.361634	NA	0.33634	0.226528	0.0542357	0.921446
ABHD10	0.516533	-0.261595	-0.369576	NA	0.779943	-1.42977	-2.53187	-0.813694
ABHD11	0.170339	0.595721	0.055773	NA	0.957275	0.015548	-1.36903	0.0325457
ABHD12	-0.177293	-0.512522	-0.31104	NA	0.505339	-0.0350666	-0.623489	0.556682
ABHD12B	-0.245222	1.03143	0.0282185	NA	0.255019	-0.258005	-0.103828	0.929061
ABHD13	0.605292	-0.0415473	-0.223307	NA	0.18033	-0.132107	-2.72327	-0.972069
ABHD14A	0.41855	1.98852	0.665917	NA	-0.150741	0.649918	-0.567505	-0.0584249
ABHD14B	-0.284833	0.623257	0.179007	NA	0.387386	0.189448	-0.0378396	0.212819
ABHD15.AS1	-0.0608633	1.45785	0.706139	NA	-0.657085	0.0380212	0.685446	0.6996
ABHD16A	0.827281	1.34483	0.344416	NA	-0.296334	1.27738	-1.12942	0.281887
ABHD17A	0.675228	-0.00723913	0.159864	NA	3.63928	0.117176	-1.76623	0.134466
ABHD17B	-0.0805564	0.104874	0.138038	NA	2.26969	0.0097128	-1.40655	-0.251482
ABHD17C	-0.525352	0.0626873	0.390691	NA	-0.398788	-0.0406955	-0.771938	0.105553
ABHD18	-0.610887	-0.119576	-0.759486	NA	-2.81903	-0.140166	2.55564	0.0134793
ABHD2	-0.636801	0.0707057	0.357027	NA	-0.113761	-0.807384	0.546231	0.440887
ABHD3	0.631083	0.0867589	0.493011	NA	0.166047	0.100214	-1.12977	-1.36321
ABHD4	0.335832	-0.361272	-0.217386	NA	-0.0315841	-0.508567	-0.400933	-0.0437501
ABHD5	0.272794	0.767613	0.380052	NA	-0.0535868	-0.0512928	-0.516967	0.137272
ABHD6	-1.10261	-0.660119	-0.120922	NA	0.78301	-0.597813	0.362572	0.296995
ABHD8	0.499089	1.40478	0.974064	NA	5.80511	0.126397	-2.43098	-0.746627
ABI1	-0.334166	0.76838	1.02824	NA	-1.5867	-0.0308891	0.807975	-0.202831
ABI2	-0.114551	0.301434	0.52817	NA	0.207127	-0.460133	-0.0321588	-0.0598995
ABI3BP	0.0404248	1.42045	0.567232	NA	-2.83949	0.103184	1.63402	-0.34617
ABITRAM	1.25738	0.17036	-0.270463	NA	-0.181893	-0.897982	0.226004	0.187336
ABL1	-2.56283	0.313948	0.546798	NA	-4.78294	0.835651	5.29199	0.289041
ABL2	-4.17778	-0.81295	-0.0130916	NA	-0.466979	-0.0340536	2.04317	0.260769
ABLIM1	-0.0741826	0.141445	0.178103	NA	0.0972672	-1.5209	0.321083	0.229924
ABLIM2	-0.968682	-0.55148	-0.017796	NA	-0.53486	0.442098	1.11565	0.0697636
ABLIM3	-0.759895	-0.546103	-1.48165	NA	-0.303468	-0.0598488	0.13012	-0.0944569
ABO	-0.769626	0.657366	0.688225	NA	-0.399837	0.520494	0.122998	-0.277805
ABR	-2.51167	-1.02411	-0.229664	NA	0.57465	-0.36278	0.099917	0.296562
ABRACL	0.914273	0.845066	0.0127538	NA	1.9757	0.484156	-1.08192	0.153037
ABRAXAS1	0.48917	0.830768	0.153119	NA	-0.481471	-0.863258	-0.0617968	-0.310116
ABRAXAS2	-0.659897	0.0379703	-0.0995967	NA	-0.498801	-1.50149	-0.169252	-0.145881
ABT1	0.290766	0.115317	0.12393	NA	1.14698	0.405655	-1.71512	-0.0755369
ABTB1	-0.0763048	0.639618	0.0821005	NA	0.0144331	0.257291	-0.13591	0.213596
ABTB2	-0.833351	-1.04013	-0.136192	NA	-0.0323052	0.760937	0.903011	0.168087
AC000068.1	-0.161705	-1.2307	0.0618943	NA	2.65474	-0.0402348	-0.663597	0.122714
AC000085.1	-0.357835	-0.80381	-0.382567	NA	0.233666	-1.59126	-0.867981	0.337182
AC000099.1	0.0490183	2.1545	1.00218	NA	-2.61104	0.380068	0.602487	0.411857
AC000124.1	-0.23869	1.51651	0.202516	NA	-1.2649	-0.245512	-0.0304174	-1.614
AC000372.1	-0.0102738	2.65483	0.707402	NA	-1.11295	-2.08462	0.183422	0.546093
AC002057.2	0.00881834	1.54667	0.535394	NA	-1.17225	-0.217877	0.377171	0.600071
AC002064.1	-0.398327	0.859242	0.516041	NA	-1.2997	-0.523299	0.447276	-0.227746
AC002066.1	-0.386909	-1.27604	0.00624963	NA	0.251722	-0.477021	-0.061054	-0.457349
AC002069.2	-0.162261	-0.368648	0.0200322	NA	-0.334652	-0.196871	0.0446324	-0.0430304
AC002070.1	-1.06188	-0.217151	-0.062981	NA	-0.876977	0.0406874	-0.0976808	0.0805598
AC002072.1	-0.143178	1.19057	0.826417	NA	-0.902117	0.0595664	0.439948	-0.00282549
AC002094.4	0.849758	0.640346	0.735194	NA	1.89163	0.164857	-0.282375	-0.0897849
AC002116.2	0.034551	1.39986	0.662742	NA	-0.920353	-0.460748	0.142955	1.21195
AC002310.1	1.33685	-0.230466	0.131396	NA	2.06762	1.05523	-0.5688	-0.370685
AC002310.2	-0.0217528	1.36109	0.653592	NA	-1.61553	-0.730854	-0.00992548	-0.012334
AC002377.1	0.0420211	-0.161999	0.146791	NA	0.364335	-0.240155	-0.670129	-0.106269
AC002383.1	0.38607	0.0376046	-0.150014	NA	-0.0606746	-0.487869	1.35543	-0.118117
AC002429.2	0.00413444	1.66071	0.91134	NA	-1.31526	0.749125	0.429654	0.816493
AC002451.1	-0.194707	-0.209174	0.00856332	NA	-0.539144	-0.292608	0.379	0.443214
AC002460.2	-0.0339034	-0.711603	-0.421603	NA	0.277565	-0.6534	1.18682	0.280475
AC002463.1	0.23495	2.0722	0.522187	NA	-1.49602	0.238686	0.192732	0.410326
AC002470.1	1.15295	0.17195	-0.0377918	NA	1.45542	-0.556022	-0.970739	-0.27032
AC002546.1	-0.0539207	0.750843	0.418099	NA	-0.495322	0.377926	0.0472387	0.370782
AC002553.1	-0.603037	-1.28534	-0.0216475	NA	0.261472	-0.357039	0.189473	0.574783
AC002553.2	0.000313742	2.19791	0.599215	NA	0.412746	-0.160215	-0.199165	-0.910604
AC002558.3	-1.67358	-0.836014	0.0135366	NA	-0.277088	-0.390333	0.736047	-0.625516
AC003005.2	0.0780306	-1.37612	0.459047	NA	-0.973821	0.659772	-0.4617	0.280509
AC003102.1	-0.394175	0.597391	0.108851	NA	-0.277303	-0.126036	0.159604	-0.196613
AC003659.1	-0.360588	0.200963	0.315675	NA	-0.58219	-0.555492	0.400087	0.730121
AC003666.1	-0.317287	1.60439	1.04484	NA	0.160737	-0.0043896	0.670444	0.493403
AC003681.1	-0.0398822	1.85823	0.137492	NA	-1.41219	0.290418	0.208211	0.978223
AC003682.1	-0.234673	-0.135342	-0.0773142	NA	-0.0396068	0.0324334	-0.0282639	0.272796
AC003991.1	0.0451088	1.38229	1.65185	NA	-2.07043	-0.196226	0.498235	0.193592
AC004034.1	0.521004	2.46944	0.0448158	NA	-0.681641	0.175536	0.252163	0.506059
AC004039.1	0.196281	1.85355	0.385947	NA	-3.43898	-0.761945	0.319052	0.245532
AC004053.1	0.0374673	1.81499	0.646358	NA	-0.266126	-0.197155	0.402115	0.237248
AC004054.1	0.0262702	1.49317	0.618713	NA	-1.94638	0.103225	-0.0730027	0.296824
AC004076.2	0.669025	2.66583	0.807805	NA	1.11875	-0.373523	0.281214	0.75649
AC004083.1	-0.286922	-0.2011	0.134688	NA	0.101676	-0.553525	0.518634	-0.0083191
AC004112.1	0.137111	4.44322	0.42889	NA	-0.826229	0.348014	1.0424	1.22025
AC004147.2	0.193161	-0.219688	-0.0107115	NA	2.60158	0.233826	-0.260963	-0.0893822
AC004147.5	-0.127569	0.485848	0.194934	NA	-0.23567	0.739162	0.943666	-0.0624207
AC004148.1	0.0625517	0.842024	0.19331	NA	0.23443	0.593991	-0.47695	-0.0980258
AC004158.1	-0.792121	0.231836	0.557994	NA	0.534666	-0.0956988	-0.15737	0.242229
AC004160.1	-0.0509749	0.640107	0.604445	NA	-0.247396	0.708828	1.1278	1.21901
AC004217.1	-0.00645662	2.64739	0.768774	NA	-0.768425	0.022443	0.010438	0.0279735
AC004233.1	0.428467	-0.0396933	0.451901	NA	2.00146	0.0740045	-0.685748	-0.235301
AC004241.1	-0.264537	0.557569	1.06243	NA	0.504322	0.635018	1.2233	-0.734408
AC004253.1	0.0978773	1.5483	0.516049	NA	-1.3752	-0.0533065	0.700927	0.540247
AC004448.2	1.41769	0.847889	0.173082	NA	-0.257969	-1.15285	-0.690201	-0.0723608
AC004470.1	0.107461	1.34635	0.514338	NA	-1.02945	0.503499	0.312695	0.39662
AC004477.1	0.233796	-0.458653	0.013114	NA	5.01741	0.243911	-1.3632	-0.762032
AC004485.1	-0.00461011	1.60669	0.34255	NA	-1.66685	0.163234	1.36988	0.742827
AC004494.1	-1.70663	-0.347504	0.0876522	NA	-0.660397	-0.761987	0.0318973	0.443959
AC004522.3	1.2059	0.493808	0.154501	NA	-1.41674	0.0138603	0.54456	0.0505221
AC004540.1	-3.22456	-0.0501877	-0.0110027	NA	0.00305969	-0.0508715	0.0688083	0.273724
AC004540.2	0.254158	1.96979	0.534701	NA	0.202575	-0.206625	0.153087	0.48386
AC004551.1	-0.955716	-1.88524	-0.205531	NA	-0.590359	-0.538896	0.564702	-0.246471
AC004594.1	-0.263597	1.19186	0.314076	NA	-0.234143	-0.205034	0.371224	1.47604
AC004672.1	-0.0935229	0.782725	0.31232	NA	-0.531144	0.166902	0.920318	0.725579
AC004690.2	0.801693	0.823414	0.357492	NA	2.9312	0.382263	0.0814255	0.127814
AC004784.1	-0.12532	-0.466181	-2.55873	NA	-0.379264	-0.0768505	0.943359	-0.296455
AC004797.1	0.124621	1.43828	0.686497	NA	0.00952536	0.223328	-0.215202	0.311418
AC004803.1	1.1538	-1.73628	-1.54326	NA	0.743425	0.16712	-0.427616	-0.951807
AC004812.2	0.603711	0.0210413	-0.247557	NA	2.9606	-1.16418	-3.16599	-0.869221
AC004816.1	0.282532	-0.801944	-0.153394	NA	1.10424	0.0197623	-0.199636	-0.243685
AC004825.3	0.172362	1.58632	0.875877	NA	-0.947303	-1.08274	0.182546	0.109971
AC004828.1	-0.223074	0.263286	-0.075381	NA	0.474631	-0.260407	1.06994	0.329312
AC004828.2	-0.192086	0.507624	-0.147087	NA	-0.0932233	-0.22572	1.29945	0.0334273
AC004834.1	-0.0746277	-2.66803	-0.755796	NA	0.0124413	-1.01389	0.729529	-0.00313649
AC004837.4	0.0902724	0.646968	0.557131	NA	1.48598	0.338181	-0.472153	-0.705615
AC004852.2	0.193773	-0.0017837	0.271724	NA	1.28678	0.388903	0.358962	0.843768
AC004865.2	-0.0610901	0.496407	0.68742	NA	0.413053	0.822001	0.13215	1.14917
AC004908.2	0.284458	0.31243	1.17862	NA	0.588235	0.0791974	-0.575863	0.000567077
AC004918.1	-0.00776197	1.00127	0.381034	NA	-0.25772	-0.425404	-0.189927	0.132171
AC004930.1	0.348584	0.550913	0.100672	NA	0.25795	1.02532	1.22871	-0.350882
AC004943.2	-0.499768	0.0629902	-0.0926804	NA	-0.521548	0.372107	0.268564	-0.0367611
AC004949.1	-0.212947	-1.67054	0.228841	NA	3.34286	0.749475	0.52264	0.221591
AC004951.1	-2.6246	-2.22671	-0.449552	NA	-1.78463	0.0804702	2.65978	0.818557
AC004982.1	-0.482098	-1.77517	-0.152511	NA	0.146356	0.306577	-0.0858972	0.197672
AC004982.2	-0.0759948	0.609088	1.01328	NA	-0.025558	-0.00463893	0.127616	0.823963
AC005009.2	-0.102845	2.75267	0.898124	NA	-2.88389	0.671669	2.07047	0.419365
AC005014.4	0.0417735	1.25241	0.274099	NA	-0.47626	-0.0528608	0.113531	0.232912
AC005034.6	1.26507	0.0734871	0.426065	NA	0.338014	-1.45123	-0.426085	-0.184026
AC005037.1	0.0744812	2.58345	1.12704	NA	-0.610647	0.274443	1.73535	0.599119
AC005040.2	-0.535193	-0.467863	2.3173	NA	-0.482342	-4.43667	-1.58781	0.396993
AC005041.4	-0.031155	0.133845	0.983261	NA	6.45889	0.844585	-1.06062	0.117882
AC005041.5	0.371191	4.34231	1.1692	NA	-1.66722	-0.0430425	-0.114327	0.582553
AC005052.2	1.17343	-0.0503358	-0.297183	NA	0.172611	-0.372467	0.423502	0.0350281
AC005062.1	0.978503	0.918735	0.2527	NA	1.68862	0.00800656	-0.614688	-0.576795
AC005064.1	-0.071482	2.03388	1.33065	NA	0.436602	-0.00390785	0.101928	0.429711
AC005070.3	-0.0409998	1.666	0.0997786	NA	-1.25858	-0.00807238	0.0246216	0.764461
AC005072.1	-0.454258	0.379863	0.623602	NA	-0.150869	-0.204457	0.447521	0.246113
AC005081.1	0.0281737	0.380949	0.77639	NA	5.49208	-0.492766	-0.709049	0.0301992
AC005089.1	-0.544427	-0.223587	0.661558	NA	-0.0685689	-0.281516	0.93395	-0.0998943
AC005091.1	-0.312338	0.375591	0.235142	NA	-0.221168	-1.40227	0.0661507	0.225472
AC005154.4	0.121012	1.86039	0.594685	NA	-0.65447	0.283808	0.115919	0.129637
AC005162.3	-0.0943747	0.405599	-0.000218528	NA	0.429416	-0.281524	-0.367215	-0.491297
AC005208.1	0.63543	0.592442	0.0206903	NA	-0.253592	-0.190924	0.851174	0.20984
AC005225.2	-1.26443	-0.174856	0.0943154	NA	-0.296294	1.21791	-0.0948012	0.272345
AC005225.3	-1.55045	-0.61333	-0.0543457	NA	-0.369074	-0.526636	0.197797	-0.0730363
AC005234.2	0.284015	1.2397	0.829041	NA	-1.49624	0.755659	1.9052	1.53617
AC005237.1	0.26515	1.81092	0.215066	NA	-0.0852074	-0.0186283	0.630609	-0.0105674
AC005253.1	0.650107	1.67759	1.13258	NA	-0.106217	-0.671026	0.427463	0.0225323
AC005261.1	0.483498	-0.122519	-0.00238788	NA	-0.183073	-0.425534	-0.800273	-0.121807
AC005288.1	1.71712	-0.00767322	-0.312431	NA	0.519579	-0.156616	-0.398523	0.161502
AC005291.2	-0.0258838	1.43125	0.761141	NA	-0.565584	0.205552	0.728436	0.319251
AC005306.1	0.475116	-0.682919	-0.472268	NA	0.129163	0.263887	-0.112919	-0.0442406
AC005329.1	1.57204	-0.591279	-0.658413	NA	0.778809	-0.276421	-0.0289811	-0.072517
AC005332.2	-0.261418	-0.0236458	-0.0194139	NA	2.36318	-0.252216	-0.0424118	-0.326361
AC005332.3	0.480707	-0.114082	-0.478866	NA	-0.616263	0.117992	-0.0776291	-0.61321
AC005332.4	0.650466	1.07296	0.694448	NA	1.21177	0.160665	-0.952688	-0.708675
AC005332.5	-0.450822	-0.310501	-0.112109	NA	-0.0151671	0.591732	-0.176997	-0.238797
AC005332.6	-0.583509	-2.10898	-0.119393	NA	4.63351	0.293635	0.00506599	0.0765434
AC005332.7	-0.480308	-0.766094	-0.249972	NA	0.0296237	-0.952434	0.396213	-0.0681858
AC005355.1	-2.11679	-0.186778	-0.104531	NA	-0.728275	0.0734957	0.153116	-0.278944
AC005358.1	-0.539245	0.101485	0.334031	NA	-0.704806	0.176909	0.642745	0.0927613
AC005363.2	0.149043	0.692801	0.553357	NA	0.178087	-0.743383	-0.911286	0.0579354
AC005387.2	-0.00330611	1.15019	0.556367	NA	0.0212547	0.0780308	0.826678	0.349043
AC005393.1	-1.13936	-0.890907	0.397877	NA	0.462629	0.237725	-0.371862	-0.370278
AC005394.1	-1.24001	0.191788	0.153908	NA	-0.662321	0.0408092	0.979893	0.513301
AC005400.1	-0.0245295	0.548125	0.206041	NA	-0.161337	0.168911	0.28929	0.142139
AC005410.2	-2.4337	-0.670832	-0.1044	NA	-0.455754	0.0476027	0.406871	0.022021
AC005414.1	0.166436	0.274398	0.443512	NA	-0.285872	1.72935	0.963177	0.691861
AC005480.1	0.0161718	1.79294	0.611049	NA	-3.21176	-0.22133	0.507606	1.29964
AC005498.3	0.0520097	-1.21477	-0.113315	NA	1.99188	-1.59507	-2.72733	-0.650514
AC005520.2	-0.835519	0.0555887	0.472133	NA	2.41569	-0.191534	-0.880857	-0.599966
AC005520.5	0.58559	0.425238	0.811913	NA	-0.187781	-0.224097	0.252659	0.384931
AC005523.2	1.41554	2.04868	0.1263	NA	-0.204649	-0.0252881	-0.476868	0.15499
AC005532.1	0.0476042	-0.750172	0.352541	NA	0.338297	0.944481	0.184939	-0.0729338
AC005534.1	-0.0318773	-0.411019	0.165933	NA	0.0247804	-0.736028	-0.125738	0.152902
AC005537.1	-0.513855	-0.563485	-0.0687395	NA	-0.00243817	0.457302	0.829361	0.127414
AC005550.2	-0.64524	0.77805	0.0762046	NA	-0.278621	0.0251454	-0.15049	-6.98853
AC005562.1	-0.469298	-0.926903	0.185696	NA	2.06247	1.41708	1.53918	-0.837064
AC005597.1	-0.243616	0.964241	0.878877	NA	0.546658	-0.0320415	0.0525775	0.497477
AC005599.1	-0.295078	0.174021	0.474651	NA	-0.126263	-0.435414	0.711441	0.0707431
AC005606.2	1.67312	-0.266216	-1.34614	NA	0.983705	0.0908244	-0.0049155	-0.0889158
AC005609.5	-0.126843	-0.260315	0.245122	NA	-0.856645	0.0184086	-0.254221	-0.193005
AC005618.1	0.169937	-0.541787	0.722619	NA	3.55439	0.00580612	-0.594724	0.270223
AC005618.4	1.06002	0.366965	0.286272	NA	0.15294	-0.0607156	-0.12985	0.227481
AC005632.3	-0.269689	0.378563	0.451886	NA	-0.0450673	-0.632536	0.798345	0.277876
AC005670.1	0.984497	-0.319817	-0.0118289	NA	2.77045	0.18484	-0.239258	-0.207945
AC005670.3	-2.04925	-0.25751	0.183157	NA	-0.0642277	0.475915	3.07803	0.81163
AC005674.2	-0.401323	0.82449	0.0745588	NA	-0.220645	0.51088	-0.20468	-0.145897
AC005692.3	-0.0527449	1.24958	0.661943	NA	-0.515075	-0.343526	0.242439	0.358673
AC005695.2	0.00627351	1.98948	1.33255	NA	-2.57527	0.8809	1.63062	1.20668
AC005696.1	0.165395	0.920675	0.731708	NA	-0.836278	0.0478479	-0.959713	0.415493
AC005696.4	0.238057	-0.0200099	0.0869098	NA	1.23065	-0.548597	-0.261935	-0.0342278
AC005697.2	-0.0500876	1.45358	0.354115	NA	-0.10533	0.115453	2.13504	1.2933
AC005699.1	0.39993	1.70817	0.211503	NA	-0.443318	-0.55422	1.01227	0.635965
AC005703.4	-0.430315	-0.02236	0.360418	NA	-1.11946	0.100428	1.55337	-0.23942
AC005726.1	-1.27525	-1.42682	0.299296	NA	1.2779	0.230293	-0.208695	-0.182754
AC005726.3	0.263214	-0.356879	-0.198113	NA	0.066432	0.125298	-0.465231	-0.317726
AC005726.5	0.479331	2.6926	1.2736	NA	-1.3209	0.0765277	0.174472	0.682147
AC005740.3	0.225193	2.63578	1.32468	NA	-0.93715	-0.486701	-0.310699	0.241424
AC005740.5	-1.17418	0.571648	0.848758	NA	0.235694	0.747067	0.832886	0.0196285
AC005746.2	0.0961905	2.21325	0.932488	NA	-0.939699	0.0511278	2.50447	1.4289
AC005753.2	-0.163718	0.0740005	-0.951287	NA	0.918246	-0.506554	2.61441	-0.228043
AC005753.3	-0.116617	-0.840173	-0.524122	NA	1.66108	-0.130603	1.42194	0.0252741
AC005759.1	-0.199427	-0.224173	0.187968	NA	1.18972	-0.921544	-0.177104	-0.00102094
AC005775.1	-0.495918	0.0148649	0.36071	NA	-0.13133	-0.054443	-0.0144593	0.422641
AC005786.3	-0.137349	-0.866995	-0.69433	NA	-0.0899111	0.143958	1.48094	-0.114323
AC005828.1	-0.0214903	0.97878	0.536853	NA	-0.250806	1.51509	0.794906	0.44709
AC005828.3	0.118342	0.566399	0.336447	NA	0.116574	0.0419058	0.550811	0.195152
AC005833.2	-0.159929	0.727942	0.406376	NA	-0.501752	-0.327625	0.00521535	0.316439
AC005837.4	1.10412	-2.11065	-0.439736	NA	1.58812	0.157548	-0.0253696	-0.030439
AC005838.2	0.635769	0.354105	-0.350775	NA	-0.950688	0.735761	0.573739	-0.208651
AC005856.1	-0.10324	1.28681	0.549448	NA	-0.783077	0.0811384	0.344432	0.307981
AC005865.2	-0.360691	-4.19716	-0.142085	NA	0.226658	-0.0837364	0.610525	0.00838049
AC005884.1	-0.117421	0.897476	0.668666	NA	-1.6568	0.320031	1.30865	0.608935
AC005899.1	-0.866141	-0.107899	0.00885317	NA	-0.776522	-0.0953837	1.12705	0.48827
AC005899.5	-0.277605	0.00488578	-0.107301	NA	0.0120271	-0.0778829	1.15578	0.334951
AC005899.6	-0.358025	0.716456	0.54439	NA	-0.171024	0.178525	0.767595	0.310136
AC005899.7	-0.971053	0.334953	0.180542	NA	-0.311545	-0.565064	0.645706	0.0395221
AC005899.8	-0.133873	1.68323	1.45076	NA	0.018637	0.0960233	2.13907	0.840862
AC005906.2	-0.22248	0.085159	0.308789	NA	0.0549537	-0.311156	1.24629	0.237241
AC005908.3	0.346056	-0.990545	-1.13049	NA	0.218383	-2.03659	-0.213394	-0.0507612
AC005920.2	0.0519225	1.5433	0.928809	NA	-3.04553	0.0487817	0.615799	0.338847
AC005921.2	0.145126	1.07496	0.885347	NA	1.05845	0.179555	-2.11584	-0.00884406
AC005972.3	-0.0495337	2.69956	0.123213	NA	-0.0263629	0.195804	0.682645	0.245747
AC005999.2	0.103215	-0.241471	-0.423978	NA	-1.43327	0.104072	1.71843	-0.179287
AC006001.2	-2.09462	-0.605165	-0.390305	NA	-1.51601	0.192899	1.78269	0.149846
AC006004.1	0.471683	1.38477	0.680033	NA	-0.884847	-0.773794	0.331632	1.02195
AC006019.1	-0.0641494	0.756197	1.00956	NA	-1.16582	-1.78681	-1.08169	0.981193
AC006019.3	-0.0365547	1.06176	0.81927	NA	-0.218751	1.0388	0.528867	1.28438
AC006041.2	-0.771178	1.14361	1.4781	NA	0.103666	-0.379413	-0.506622	0.309427
AC006042.2	-0.055598	1.03669	0.745579	NA	-1.01695	0.828023	0.391431	0.347131
AC006043.1	-0.0767851	0.195507	0.409542	NA	0.795397	-0.244004	0.306119	0.128436
AC006058.1	0.0306157	-0.00463465	-0.202227	NA	-0.00612943	-0.15266	0.0135201	0.122536
AC006059.1	0.201221	1.6148	0.607438	NA	-1.04259	-0.192191	-0.136498	0.198634
AC006064.2	0.240931	1.48101	0.708272	NA	-1.48883	-0.115116	0.252296	1.02942
AC006115.2	0.432923	2.5105	0.515235	NA	0.510728	0.445609	2.12209	0.592055
AC006116.8	0.178505	1.67148	0.775966	NA	-1.87481	0.612052	0.344966	0.647723
AC006141.1	-0.803848	-1.07038	-1.38322	NA	-0.28824	-0.878718	-0.0471925	-0.326007
AC006145.1	0.00363258	1.63583	0.686033	NA	-0.702314	0.0543366	0.132042	0.554372
AC006148.1	-0.0505299	-0.435685	-0.0719377	NA	0.0495054	-0.464415	0.401326	-0.147349
AC006157.1	0.140756	0.544112	0.176786	NA	7.55401	0.284041	-0.100869	2.96101
AC006160.1	0.363594	1.2758	0.167668	NA	-0.879253	0.0444346	0.704397	0.379671
AC006213.2	-0.0588091	-0.272728	0.585014	NA	0.797599	0.80907	-1.08779	0.0994115
AC006213.3	-0.232505	-0.53719	0.320571	NA	-0.0814383	-0.959644	-0.404825	-0.027972
AC006230.1	0.461364	0.106192	0.769398	NA	-0.054232	-1.35373	-0.0720574	-0.100023
AC006262.1	0.109976	-1.89287	-0.910187	NA	0.488308	-0.176645	-0.840684	0.538422
AC006262.2	-0.138755	0.8636	0.481038	NA	-1.107	0.112833	0.0738659	0.220713
AC006270.1	0.103857	2.25556	0.623129	NA	-0.611584	-0.0128045	0.31583	0.123245
AC006296.3	0.369857	0.965556	-0.000489229	NA	-0.206729	0.980159	1.75367	-0.102062
AC006299.1	0.128014	-0.0687795	0.287602	NA	-0.794254	-1.72752	-0.284552	0.066642
AC006333.2	0.0721016	-0.0467867	-0.156153	NA	1.63274	-1.02445	-1.72793	0.00696557
AC006355.2	0.110999	1.32166	0.86383	NA	-0.467976	-1.38605	-0.0563572	0.329044
AC006378.1	0.472679	0.823348	0.165103	NA	-1.88661	-0.224168	-0.0756211	-0.0825786
AC006387.1	-0.0269721	0.968736	0.614938	NA	-1.2682	-0.118128	0.738582	0.409936
AC006427.2	-0.356292	0.411239	0.0475323	NA	-0.254327	2.22119	1.62713	1.49835
AC006450.3	0.43359	-0.632491	-0.0370476	NA	0.282123	-0.582554	-0.606738	0.297689
AC006452.1	-0.102905	-0.0531021	0.358559	NA	0.641594	0.0937693	0.0941765	0.309678
AC006460.1	0.29038	0.92281	0.412717	NA	-1.06116	0.0567895	-0.0223452	1.62993
AC006460.2	-0.0232345	1.14574	0.276699	NA	0.881319	-0.0326629	-0.224733	0.340899
AC006480.2	0.00849476	1.3238	0.87434	NA	-0.942511	-0.196274	0.32641	0.420688
AC006504.2	0.0717551	2.66825	0.74386	NA	-2.20034	0.408191	1.00147	1.17175
AC006504.5	0.199823	2.00799	0.92092	NA	-2.03668	-0.00465056	2.74335	0.533318
AC006511.6	1.10825	-0.18763	-0.143822	NA	0.027074	0.224306	0.0545381	-0.465256
AC006525.1	-0.834833	-0.550629	-0.00993407	NA	-1.49268	0.327595	0.503676	0.0867755
AC006538.1	0.149526	0.173232	-0.0173941	NA	0.0786946	-0.491193	-1.15084	0.220737
AC006547.1	0.0204182	1.42616	0.955278	NA	-0.0941347	-0.288733	1.21721	0.89766
AC006581.2	-0.341509	0.169757	0.100869	NA	-0.34621	1.27638	0.887074	0.289842
AC006946.2	-0.217165	0.164845	0.089922	NA	1.36422	0.0367978	-3.11403	-0.101232
AC006972.1	0.356266	1.07382	0.383711	NA	-0.0184033	-0.0379995	0.173437	0.127111
AC006994.2	0.132059	-2.87292	-1.24819	NA	1.94764	-1.30838	-0.743854	-0.484376
AC007014.1	0.0379063	1.7465	0.916671	NA	-0.874407	0.601017	1.26651	0.693722
AC007036.5	0.616025	-0.0809059	-0.188171	NA	0.183173	-0.781557	0.658437	0.141065
AC007038.1	0.05189	1.64153	0.32246	NA	-3.32809	-0.0100983	1.99287	0.317381
AC007038.2	0.309198	1.42874	0.187271	NA	-1.09674	0.100112	0.101874	-0.161312
AC007066.2	-0.248984	-0.853543	-0.218437	NA	-0.111297	-0.662341	-0.723851	-0.24901
AC007091.1	-0.781869	0.0135357	0.168425	NA	-0.394124	0.107605	-0.0528419	-0.57124
AC007098.1	0.0685099	2.33158	0.878906	NA	-1.02414	-0.0450934	0.279771	0.280401
AC007099.1	0.889242	0.668765	-0.0958854	NA	-1.0481	0.0977803	0.300179	1.08158
AC007114.1	0.15628	1.28904	0.458429	NA	0.723954	-0.1643	0.368523	-0.399911
AC007114.2	0.612522	1.46003	0.395698	NA	0.36847	0.261822	0.0325441	0.43838
AC007130.1	0.105813	1.22	0.689689	NA	-1.43133	-0.458121	0.023336	0.391564
AC007193.1	0.0519302	1.57105	0.878117	NA	-0.341995	2.18039	2.11133	0.511504
AC007216.2	0.0183229	1.18785	0.195882	NA	-0.335367	2.71928	2.32848	0.281768
AC007216.3	-0.20059	0.824603	1.05047	NA	-0.392913	0.740486	1.12926	0.975024
AC007216.4	0.112533	1.08835	1.35564	NA	-1.1202	-0.107985	1.27917	0.143176
AC007220.1	-0.630432	-0.84539	-0.296855	NA	-0.597276	-0.75481	2.10061	0.227741
AC007220.2	-0.0647912	1.19713	0.705916	NA	0.393394	-0.172246	0.849506	0.310005
AC007221.1	-1.06488	0.947338	0.724488	NA	-0.671983	0.189373	0.547992	0.0652798
AC007222.2	-0.21541	1.30628	0.614794	NA	-0.442459	-2.05666	-0.388436	0.178002
AC007255.1	-0.784235	1.8383	1.34643	NA	-0.214754	-1.95165	0.370869	0.229334
AC007262.2	-0.048937	-2.44916	0.229635	NA	-0.0656158	0.0371164	-0.124109	-0.152668
AC007277.1	0.391495	0.99737	0.00666661	NA	-1.97193	0.417596	3.17144	0.263397
AC007285.1	0.346735	-0.508032	-0.0123189	NA	3.51741	-0.0496136	-0.0571309	-0.752562
AC007285.2	0.0818663	0.905098	0.585083	NA	0.283196	-0.194583	0.138862	0.143293
AC007292.3	0.0332487	0.0908921	-0.186242	NA	-0.677265	-0.448824	0.642029	0.142695
AC007317.1	-0.00617158	0.427149	-0.0441503	NA	-0.140688	0.30083	0.278636	0.147589
AC007317.2	-0.515995	0.202226	-0.0418641	NA	-0.197408	-0.361021	0.342743	0.124121
AC007319.1	0.0309424	1.2617	-0.20187	NA	-1.32302	2.05181	1.8058	0.409666
AC007325.4	0.389656	-0.370515	-0.148055	NA	0.108127	0.968779	-0.411576	0.0840627
AC007347.1	0.0628609	0.815713	0.0480973	NA	-0.932729	-0.106149	0.0124864	0.47957
AC007364.1	-0.669641	-0.725791	-0.0123948	NA	0.209543	0.0637231	0.429025	-0.0440088
AC007368.1	-0.770504	-0.919397	-0.0838522	NA	0.460872	-0.48296	-0.164305	0.643932
AC007376.2	-0.659045	-0.52473	-0.305986	NA	-1.33287	-0.143865	0.099075	-0.870903
AC007384.1	-0.00702496	1.77977	1.07312	NA	-2.95846	0.535233	0.633674	1.3283
AC007389.1	-1.64226	-1.51887	0.825756	NA	-2.27642	1.18574	4.53608	0.0774525
AC007389.3	-0.825494	0.569692	0.588584	NA	-2.91529	0.415387	2.67549	0.544566
AC007390.2	-0.22562	-0.254493	0.290594	NA	0.584724	-0.0790026	0.565843	0.0669025
AC007402.1	-0.190364	-0.229019	-0.753563	NA	0.138513	1.09808	2.2659	-0.564592
AC007405.1	-0.112456	0.324406	0.538013	NA	-0.458848	0.755686	3.84505	0.499378
AC007405.2	0.0299631	0.836985	0.936009	NA	1.77775	1.43794	0.409034	-0.657042
AC007405.3	1.12809	0.484966	0.297158	NA	6.98897	0.155564	-2.09924	-0.366553
AC007406.3	-0.0986448	1.01358	0.697609	NA	-0.0857346	-0.559559	0.255037	0.783246
AC007406.5	-0.00232839	0.762955	0.628512	NA	-0.042835	-1.51799	-0.669995	-0.00168019
AC007448.5	-0.803986	-0.497231	-0.161039	NA	-0.469957	0.100811	0.769273	1.00012
AC007493.1	-0.722886	0.0363369	0.261344	NA	-0.371914	-0.659284	0.41858	0.130829
AC007494.2	-0.0491242	1.26874	0.318796	NA	-1.48978	0.074964	0.106249	-0.0955264
AC007495.1	0.0307715	1.38488	0.436362	NA	-0.65805	0.846755	0.829652	0.866544
AC007533.1	0.0819407	1.30925	0.808585	NA	-0.918504	-0.0942089	0.152978	0.510858
AC007535.1	-0.113218	1.04276	0.550749	NA	-1.11449	-0.227936	0.0662483	0.151325
AC007541.1	0.0657621	-0.302312	0.0758005	NA	2.47461	0.227927	-0.776131	-0.0660842
AC007563.2	-0.376144	0.0477339	0.0979848	NA	3.45583	0.413908	-0.204211	0.363114
AC007566.1	-0.348906	-0.358282	-0.207446	NA	-0.54749	-0.464658	1.36264	0.242124
AC007569.1	0.143989	2.40681	0.930879	NA	0.101836	-0.300423	-0.399388	0.0954905
AC007610.2	0.059238	2.41339	0.767384	NA	-1.73226	0.855863	0.250519	0.210733
AC007611.1	1.07935	0.559611	0.577057	NA	0.442039	0.271879	-0.547897	-0.237622
AC007614.1	0.288841	2.04629	1.30051	NA	-0.00386327	0.267867	0.454372	-0.197916
AC007619.1	0.0717379	0.926208	0.281967	NA	-0.0978576	-0.000573931	0.172339	0.454977
AC007622.2	0.0636282	1.48822	0.655996	NA	-0.993759	0.0563189	0.0265921	0.350073
AC007637.1	-0.0986929	0.505187	0.600461	NA	0.810841	0.685838	-0.410496	0.393223
AC007638.1	0.195781	2.63224	1.00407	NA	0.493396	-0.359868	-0.139979	0.888394
AC007638.2	0.0188087	0.499652	0.917014	NA	1.03593	-0.183925	-0.0228306	0.614239
AC007666.2	-0.68924	1.06998	1.13847	NA	-0.202854	-0.518474	0.3095	0.0788778
AC007681.1	-0.0715294	1.37775	0.987017	NA	-2.08082	-0.122055	0.438546	1.60285
AC007682.1	0.336159	0.828642	0.406447	NA	0.0514556	0.0708216	0.259729	0.00274802
AC007686.2	-0.134358	1.39869	0.302052	NA	1.61736	0.0956242	1.76895	0.472787
AC007686.3	0.330738	1.03429	0.779874	NA	-0.0109337	-0.873611	0.352744	0.286227
AC007686.4	-0.166826	-0.310766	0.145851	NA	0.121568	-0.624331	0.776432	-0.248424
AC007695.1	-0.161631	2.41446	1.20189	NA	-5.79033	0.22715	0.267426	0.565695
AC007728.1	0.720106	1.76008	0.313412	NA	-0.716069	-0.216193	-0.0738657	0.473705
AC007743.1	0.770154	0.30561	-0.140796	NA	0.00369828	-0.449445	0.211472	0.107238
AC007773.1	-0.38544	-1.04707	0.25705	NA	0.826358	-0.168114	-0.267958	-0.326856
AC007780.1	-0.644549	-0.592722	-0.406	NA	0.85078	-0.0331231	1.64069	1.06259
AC007785.1	-1.02014	-2.39418	-2.13635	NA	-0.189054	-2.25888	-0.203813	-0.0741672
AC007785.3	0.0182342	1.22289	0.644509	NA	-0.684021	-0.178855	0.860641	0.026086
AC007786.4	0.500875	0.408095	0.20059	NA	-1.1096	0.730253	0.432395	0.223357
AC007846.1	0.0318633	0.582542	0.435161	NA	-0.71465	1.09161	1.23095	0.448995
AC007848.1	1.75767	1.88147	2.77987	NA	2.087	-0.0888173	-0.647005	0.319116
AC007878.1	-0.204218	-2.25053	-0.263922	NA	-0.253451	-0.353256	0.200647	-0.0881009
AC007938.3	-0.274454	0.140132	0.301198	NA	2.60306	0.46274	-0.168019	0.41131
AC007953.2	-0.633839	1.57505	0.40279	NA	-0.0441665	0.231361	-0.0885042	0.365137
AC008014.1	-0.165107	-1.17556	-0.814579	NA	-0.129336	0.337933	4.28017	-0.0205655
AC008050.1	-0.627432	-0.146888	-0.0944153	NA	-0.75883	0.270171	0.477875	-0.382329
AC008056.1	-0.00482803	1.19647	0.771953	NA	-1.80984	-0.365136	0.201584	0.643963
AC008056.2	0.0635239	1.56245	0.793754	NA	-2.55076	0.149298	0.781831	0.947798
AC008056.3	0.528528	0.803169	0.256836	NA	-0.545772	-0.753418	0.0137475	0.0289745
AC008067.1	-0.150201	2.12157	0.677858	NA	-1.65795	-0.145467	0.442164	-0.0435512
AC008073.2	-0.256284	2.76336	1.46241	NA	-0.214947	-0.0314383	1.83327	0.711224
AC008079.1	0.311665	1.09051	0.809612	NA	0.144632	0.086767	0.00995043	0.164965
AC008083.2	0.352188	1.15402	-0.323824	NA	-0.390755	-0.223209	0.949403	-0.460448
AC008083.3	0.0266027	-0.562036	-1.59971	NA	-0.0576092	-0.13195	1.75986	-0.282412
AC008105.1	0.564763	-0.0765096	0.231833	NA	6.36774	-0.0195604	-2.35289	-0.316232
AC008105.3	-0.137029	0.276448	-0.07097	NA	0.432891	0.0986101	2.2751	-0.239387
AC008115.2	0.769036	1.97311	0.777003	NA	-0.283471	0.622855	1.68904	0.802391
AC008119.1	0.379738	3.03712	0.379192	NA	-0.547019	-0.964427	0.271692	0.630637
AC008124.1	0.0646108	-0.670619	-0.112987	NA	7.47391	-0.292949	-4.05614	-0.567076
AC008264.2	1.26811	0.580308	-0.0519905	NA	-0.296245	-0.0568914	-0.00896085	0.190834
AC008267.5	0.363328	0.997136	0.0575344	NA	-0.320583	-0.0487028	-0.0659126	-0.000585491
AC008269.1	-0.0296425	0.723658	0.962379	NA	-0.10201	1.52691	0.620753	0.219255
AC008277.1	0.169208	1.48054	0.624022	NA	0.0628846	-0.497712	0.431794	0.596255
AC008393.1	1.1025	-0.0964986	-0.21639	NA	1.77417	-0.37309	-1.99217	-0.876603
AC008415.1	-1.30752	-0.497331	0.13512	NA	-0.231392	-0.355732	-0.0466304	0.304398
AC008438.1	0.154287	0.197784	0.659095	NA	2.2411	-0.0302248	-1.41547	-0.522297
AC008438.2	0.324182	0.535851	0.0687949	NA	-0.319688	0.447573	0.429333	-1.39435
AC008443.1	-0.0659307	0.582716	0.616715	NA	1.26947	-0.0283574	-0.29333	1.21265
AC008443.4	0.493353	-0.172065	-0.0412832	NA	5.76457	0.143951	0.0291179	0.000979547
AC008443.5	0.774783	-0.865313	-1.59711	NA	2.90482	0.501689	-0.302216	0.0249596
AC008443.8	-0.327001	0.129379	0.527516	NA	0.292738	-0.115703	-0.117925	0.24933
AC008462.1	-1.67039	-0.443941	0.0169808	NA	-1.25931	0.235894	0.205188	0.174848
AC008467.1	-0.426003	-1.85439	0.00721471	NA	0.000461932	0.0598516	0.0687059	-0.0654799
AC008525.1	0.232984	1.98871	1.04031	NA	-0.181622	0.168602	0.913594	0.669878
AC008537.2	-0.289548	1.27481	0.973331	NA	-0.616752	-0.849869	1.12858	0.761118
AC008537.4	0.108166	2.08063	0.621579	NA	-0.731676	0.382653	1.32575	0.953841
AC008543.1	0.0361549	-1.3778	-0.46665	NA	1.68331	-0.650054	0.133938	0.756134
AC008549.2	-0.431872	0.474881	0.42091	NA	-0.474086	-0.542029	0.147454	0.0706441
AC008551.1	1.24724	0.588044	0.153912	NA	-0.508117	-0.506451	0.79578	0.12922
AC008554.1	0.291774	2.05163	0.993929	NA	-1.43901	-0.161447	0.0240724	0.291516
AC008571.2	-0.590222	-2.12633	-1.25975	NA	-2.04683	-0.144373	2.30415	0.295862
AC008591.1	-1.07208	0.239111	0.237524	NA	-1.38965	-0.477121	1.99131	0.169762
AC008608.2	2.12627	0.326081	-0.0794499	NA	2.47217	0.269954	-0.539552	-0.680505
AC008610.1	0.221022	-0.177969	-0.790575	NA	3.23917	-0.176057	-1.12269	-0.156276
AC008629.1	-0.109346	-2.14998	-0.114784	NA	-0.698446	0.985833	0.371553	-0.273965
AC008667.1	-1.50704	-0.658512	-0.177148	NA	0.947689	0.414752	0.618485	0.469731
AC008676.1	-0.0273467	1.83083	0.830052	NA	0.597486	-0.0931656	0.743761	0.0280237
AC008691.1	-0.313678	-1.3774	-0.273351	NA	0.343956	-0.174183	0.138658	-0.244536
AC008696.2	0.0491434	0.810533	0.410494	NA	-0.948867	0.0801199	0.39835	0.206164
AC008708.2	-0.0695432	1.48686	0.904033	NA	-0.744378	-0.21724	0.160401	0.387536
AC008728.1	0.440252	1.48338	0.0783591	NA	-1.59548	-0.246946	0.776412	0.597689
AC008731.1	0.0372926	1.53708	0.782292	NA	-0.345206	0.359348	0.218941	0.877132
AC008735.2	-0.141437	1.36988	0.624776	NA	-0.983321	-0.335153	-0.0915788	0.312085
AC008736.1	-0.0610873	-0.0757918	-0.102332	NA	3.07895	0.0414849	-0.586298	-0.0726954
AC008738.1	0.653413	-0.0960477	-0.0172469	NA	1.50854	-0.837543	-0.76629	0.00817552
AC008751.3	-0.94225	-0.0397228	0.0432573	NA	-0.265162	-0.0937319	0.0288744	0.179716
AC008758.2	0.0969071	1.32645	0.828795	NA	0.00776936	-1.14002	0.156438	0.182486
AC008761.1	0.771806	1.18802	0.676339	NA	-0.17017	0.0728824	0.179702	0.119473
AC008764.6	0.118286	-0.721128	-0.30664	NA	0.221295	-0.530109	-0.568007	0.0441022
AC008764.8	1.3029	-0.183711	0.036549	NA	1.35587	-0.451924	-1.89755	-0.349274
AC008771.1	0.19744	2.34888	0.820694	NA	-3.66025	0.0470148	0.714773	0.758114
AC008781.1	0.044981	1.24023	0.691463	NA	-0.31115	0.113399	0.437836	0.612437
AC008781.2	0.559449	1.53833	0.523725	NA	-0.630901	0.550439	1.42477	0.681504
AC008840.1	-0.495926	-0.358648	-1.2197	NA	-0.121243	-0.590278	0.601749	-0.0604198
AC008870.2	-0.779743	0.267376	0.00663331	NA	0.373163	-0.248257	0.514757	0.184404
AC008870.4	-0.0810652	1.16098	0.233446	NA	-1.30846	-0.0773212	0.388341	0.170377
AC008871.1	0.00952074	1.21782	0.392229	NA	-1.30473	-0.40742	0.461496	0.306798
AC008883.1	0.343624	1.30656	0.578487	NA	-0.00779602	0.589985	1.29183	0.640551
AC008892.1	0.148125	1.59643	0.386617	NA	-0.829911	-0.0550981	0.342496	0.051495
AC008906.2	0.317397	2.79049	0.534701	NA	0.604359	0.655475	-0.500628	0.414757
AC008937.2	0.137692	1.57863	0.970442	NA	-2.09744	-0.101071	0.401712	0.690388
AC008946.1	0.242747	0.175394	0.501126	NA	1.14735	-0.0881327	0.768928	0.297495
AC008957.2	0.00337727	2.02462	0.27018	NA	-0.133549	0.972568	0.444029	1.21418
AC008966.1	0.0807923	-0.423925	-0.50365	NA	0.0861003	-0.209095	-0.624427	-0.639709
AC008969.1	1.38051	0.806226	0.324572	NA	-0.00577705	-3.80569	-2.21741	0.332865
AC009041.2	0.38686	0.549681	0.147282	NA	0.458521	0.764708	0.272622	-0.803686
AC009053.3	0.449724	0.336861	0.508695	NA	-1.16054	0.607847	-0.208485	0.977517
AC009055.1	-0.317232	2.62282	1.04752	NA	-2.12039	-1.12618	-0.442154	1.2465
AC009060.1	0.0120133	1.04342	0.105852	NA	0.0246925	1.61953	0.426032	0.737163
AC009061.2	-1.35143	-3.42835	-0.291439	NA	0.0194686	0.0448912	1.71563	0.240076
AC009063.2	-0.054795	1.59671	0.810582	NA	-0.92748	0.133286	0.122365	0.423071
AC009065.2	0.492828	0.897161	0.331607	NA	0.833937	0.278271	0.897031	0.564641
AC009065.4	0.156046	0.134445	0.266726	NA	0.831685	1.74625	0.0346661	0.305447
AC009090.6	-0.00472992	2.38082	1.40549	NA	0.476592	0.0891012	0.0242183	0.652609
AC009093.2	-0.609263	-1.69052	-0.207498	NA	0.0903562	-1.52255	-0.0602849	0.800017
AC009097.1	-0.11596	1.66073	1.03876	NA	-2.85592	0.426096	1.27717	0.0998121
AC009102.4	-0.0199267	1.17991	0.802613	NA	-0.843055	-0.239915	0.236258	0.631037
AC009107.2	0.131666	0.494489	0.0745633	NA	-0.0791582	0.724777	0.154567	0.180675
AC009113.1	0.637965	-0.877353	-0.603651	NA	2.98193	0.042132	-1.34962	-0.234622
AC009118.3	0.0625407	2.03472	1.14836	NA	-0.582473	2.92062	1.47447	0.604075
AC009120.2	-0.630662	-0.772509	-0.133024	NA	-4.39766	0.673651	5.15592	0.554733
AC009120.4	0.00436787	0.759553	0.168075	NA	0.0535766	1.86867	1.04416	-0.40758
AC009126.1	-0.26604	-3.8735	-0.383822	NA	-0.156426	-0.161835	0.401971	0.0585304
AC009133.1	-0.0394771	1.54588	0.876371	NA	0.00495326	0.770281	0.571115	0.562766
AC009137.1	0.0144085	1.4875	1.25919	NA	-0.115652	0.578598	0.758287	0.702511
AC009139.1	-0.218433	0.852506	0.341681	NA	0.318666	-0.136668	-0.0512611	-0.109231
AC009139.2	-0.0768849	1.74222	0.439219	NA	-0.151541	0.750162	0.11639	-0.43905
AC009148.1	0.0405251	-0.485635	-0.00484787	NA	0.0876888	0.0190462	0.0337231	-0.324392
AC009152.3	-0.0197811	1.11283	0.278707	NA	-2.34748	-0.0422113	0.64624	0.605251
AC009152.6	-0.189966	0.761907	0.32338	NA	-1.05309	-0.0344569	0.73494	0.332914
AC009163.1	-0.0252051	2.56024	1.57539	NA	0.242648	0.513275	-0.168129	0.144329
AC009163.7	-0.307763	-2.61699	-0.432881	NA	1.07171	0.340276	-0.734899	-0.467653
AC009226.1	-0.0855924	0.695369	0.240334	NA	-0.232319	-0.747489	0.697683	0.272481
AC009227.1	-0.20788	1.12812	0.933578	NA	0.498936	-0.0641741	0.00934347	0.0500922
AC009228.1	-0.0997637	2.65356	0.135742	NA	-0.13541	0.0334135	1.03647	0.995974
AC009230.1	0.186839	0.971797	0.951965	NA	-0.117168	0.32212	0.249781	-0.0778891
AC009234.1	-0.128156	0.754138	0.415163	NA	-0.00345477	0.679709	0.743921	0.159026
AC009242.1	-0.0422833	0.884902	0.352608	NA	-0.698141	0.174469	1.45968	1.05857
AC009244.2	0.190713	1.61425	0.300526	NA	-0.335981	0.960732	0.384613	0.404716
AC009264.1	0.0298125	0.737197	0.436994	NA	-2.50911	-0.00431116	0.372031	1.03462
AC009275.1	-0.683984	0.299833	0.316464	NA	-0.389282	0.0826553	0.303493	-0.00368912
AC009283.1	0.00650478	-0.240041	-0.121888	NA	1.10321	-0.168698	0.0826994	-0.0388857
AC009299.3	0.0400617	-0.658097	-0.496091	NA	-0.0878404	-0.000107126	0.00328911	0.404828
AC009303.2	-0.165896	0.780774	-0.0832474	NA	-0.295649	0.0128904	-0.120148	0.0728349
AC009312.1	-0.948858	-0.636893	-0.46999	NA	-0.375614	0.225726	1.03911	0.321347
AC009315.1	-1.70149	0.434942	0.96254	NA	0.325117	0.846274	0.0741818	0.0594416
AC009318.1	0.0296727	0.0180475	0.0500272	NA	-1.35951	-0.0746929	1.37045	1.64206
AC009318.3	0.20605	0.912009	0.134685	NA	-1.0939	-0.0733506	0.477209	0.15806
AC009320.1	0.309515	1.39759	0.564796	NA	-0.157392	1.2126	0.429588	0.353573
AC009365.4	0.0116701	1.35102	0.453003	NA	-0.866946	-0.0239729	0.368068	0.369052
AC009403.1	0.17899	3.38213	1.10206	NA	-0.146014	-0.908917	0.0744664	0.0372831
AC009403.2	0.00879575	-0.584845	0.107851	NA	0.996101	-0.867195	0.27006	-0.0745578
AC009404.1	-0.118908	0.630975	0.512868	NA	-0.290647	-0.214211	-0.0312151	-0.228905
AC009435.1	-1.20408	-1.35678	-0.162147	NA	-0.447824	0.60005	0.73899	0.00847938
AC009495.1	0.00234341	-1.92795	-0.303208	NA	-0.0390043	1.3426	2.51184	-0.101162
AC009501.3	0.198146	1.85373	0.31387	NA	-1.86425	-0.291864	0.860718	0.605372
AC009505.1	0.118828	1.79097	0.661913	NA	-2.46883	0.426558	0.526301	0.926844
AC009506.1	0.0861948	0.00315391	1.01094	NA	0.902459	0.352465	-2.46976	-0.729199
AC009522.1	-0.152316	-2.60992	-0.966306	NA	-0.142624	-0.937932	0.921786	1.03746
AC009542.1	0.0643734	1.55063	0.186178	NA	-0.610733	-0.460404	0.344756	0.37473
AC009554.1	0.143742	2.40603	0.645945	NA	-1.9923	-0.0991114	0.614411	1.0088
AC009560.3	-0.0804004	0.843562	0.444245	NA	-1.31539	0.209902	0.17305	0.359548
AC009560.4	-0.137592	0.140613	0.064894	NA	-0.7251	-0.105502	0.216562	0.739585
AC009630.1	-0.366026	0.508444	0.643581	NA	-2.45875	1.07136	1.24517	1.51055
AC009690.2	-0.00216293	2.13068	0.715679	NA	-1.85441	0.0877849	1.31751	0.781864
AC009716.1	0.0418418	1.94975	1.03577	NA	0.221032	-0.0132857	0.0751474	0.348175
AC009779.2	0.45837	-0.132735	-0.139139	NA	1.31421	-0.110315	-1.15498	-0.0456398
AC009812.1	0.736672	-1.13655	-0.256959	NA	1.13009	-0.1572	-0.985331	-0.292637
AC009831.1	-0.136168	-0.083359	0.632836	NA	3.15415	0.41263	-1.45098	-0.358004
AC009879.4	-0.683774	-1.50525	-0.247412	NA	-1.31478	0.18942	0.68235	0.452626
AC009884.1	-0.182653	0.532075	0.268782	NA	-0.880029	-0.467993	0.429968	0.140253
AC009899.1	-0.168142	-0.0768908	0.852789	NA	2.72914	0.0197264	0.672932	-0.154859
AC009950.1	-0.349203	1.61844	0.760325	NA	0.882442	-1.02625	0.916162	-0.0936959
AC009951.5	0.316153	1.98047	0.979025	NA	-1.30324	-0.152527	0.348842	1.02538
AC009951.6	0.733158	-0.0580191	0.226424	NA	1.02768	0.0753084	-0.493623	-0.249288
AC009961.1	-0.524563	-3.05044	-1.43006	NA	0.79907	-0.51418	0.399498	-0.246633
AC009975.1	-0.671431	-3.08319	-2.6005	NA	0.850087	-2.74831	-0.238179	-0.459476
AC009975.2	0.159044	-0.346154	-2.68079	NA	0.0142697	-2.13297	-0.175644	-0.611363
AC009996.1	-0.0250679	1.3053	0.471497	NA	-0.0191755	-0.166681	0.571287	-0.174853
AC010157.1	0.0715215	1.38536	0.553497	NA	-0.964197	-0.120784	0.220841	0.161615
AC010168.1	0.0279157	1.48057	0.837708	NA	0.921273	-0.156983	0.711446	0.372561
AC010168.2	0.28607	-1.40975	-0.629499	NA	3.38154	-0.559665	-0.490026	-0.612438
AC010173.1	0.0356944	2.22119	0.577766	NA	-1.04614	-0.102327	0.320108	0.243544
AC010175.1	-1.45216	-0.319269	0.0989436	NA	-0.759198	-0.211386	-0.0582367	0.159463
AC010198.1	0.267565	0.0229044	-1.66055	NA	-0.477992	-0.517987	-0.165984	-1.40878
AC010198.2	-1.95389	-0.951323	-0.941933	NA	-0.197815	0.0426938	-0.0531972	-1.15924
AC010201.3	0.951873	0.541073	0.328109	NA	-1.00421	-0.630653	-0.0746911	0.0118097
AC010210.1	0.240008	0.217652	-0.0665105	NA	-0.297063	0.181021	0.159824	-0.230652
AC010226.1	0.154666	1.24776	0.324602	NA	0.0614013	-1.02238	-0.759227	0.224476
AC010230.1	0.071689	1.85224	0.702184	NA	-0.146798	-0.0488821	0.782083	0.313367
AC010245.2	1.11035	-0.0347262	-0.155921	NA	-0.0671179	-0.0331716	-0.605457	-0.16393
AC010260.1	0.121511	2.36128	0.816749	NA	-0.749656	0.213306	0.0109119	1.08946
AC010261.2	0.169337	1.61388	0.64214	NA	2.1699	-1.28439	-0.108506	0.531439
AC010267.1	0.916543	0.365684	0.808661	NA	0.271401	-1.32565	-0.403634	0.0141521
AC010273.2	0.0112266	1.5771	0.159748	NA	-0.893373	0.00993079	0.880138	0.114491
AC010275.1	0.182568	1.11547	0.458021	NA	0.176048	0.78231	-0.0134346	0.642751
AC010280.1	-0.553212	-1.43484	-1.54676	NA	0.187815	-1.28666	-0.419751	0.159889
AC010285.3	0.650419	0.168532	-0.0391916	NA	-0.209863	0.102272	-0.20669	-0.142495
AC010307.2	0.234548	2.24356	0.142922	NA	-1.70958	-0.417822	0.0524208	0.436211
AC010307.3	0.382787	1.38173	0.968783	NA	-0.170619	0.107552	0.11366	0.362008
AC010307.4	0.11222	1.49223	0.503264	NA	-1.08775	-0.023303	0.148398	0.558133
AC010319.4	-0.172043	1.26918	0.625109	NA	-1.19287	-0.383648	0.0376273	0.658719
AC010320.2	-0.0388101	1.33382	0.51571	NA	-0.46347	0.414086	0.219329	0.169275
AC010320.3	1.28469	0.970299	-0.497975	NA	-0.245165	-0.754177	-0.0543869	-0.177491
AC010320.4	0.108607	1.10343	0.35778	NA	-0.86717	-0.190709	0.310384	0.242159
AC010327.5	-1.04602	-0.163808	0.513887	NA	-0.236953	-0.14315	0.0641112	0.282509
AC010327.8	0.116982	-1.23776	-0.396722	NA	-0.41417	-0.195218	0.205113	0.195686
AC010331.1	1.39038	-0.22655	-0.707698	NA	0.237189	-0.905845	-2.44325	-0.279293
AC010332.3	0.217379	0.915008	0.330175	NA	-0.961772	0.115342	-0.240008	-0.250803
AC010333.2	-0.121567	2.55166	1.38448	NA	-0.800575	0.169194	0.974366	0.260415
AC010336.3	-0.239275	1.38147	0.357389	NA	-0.311387	0.107571	0.0744595	0.59474
AC010336.8	0.226083	-0.670299	-0.309004	NA	0.228961	0.0280747	-0.26876	0.20614
AC010343.3	-0.300373	1.00634	0.463197	NA	-1.5998	0.346581	2.18443	0.685861
AC010359.3	-1.56182	-0.338159	0.0316499	NA	0.998674	0.227889	0.179885	-0.0139773
AC010422.2	-0.13904	0.342389	0.337532	NA	-0.879877	-0.302165	0.448748	-0.0931375
AC010476.2	-0.177133	-2.98816	-0.0417826	NA	0.949808	0.074317	0.00486831	-1.09762
AC010478.1	-0.613097	-0.413996	-0.00198442	NA	0.413754	-0.391085	-0.500152	0.088724
AC010491.1	0.285029	-0.0179797	0.04875	NA	0.139617	0.400389	-0.767373	0.234242
AC010504.1	0.0672047	-1.32889	0.00198046	NA	1.06323	-0.207804	-0.0132994	0.278066
AC010531.5	-0.162265	0.742602	0.511395	NA	0.00197052	0.0757372	0.616186	0.407651
AC010531.6	0.271563	-1.23117	-1.61574	NA	0.590709	0.298834	-1.3514	-0.537909
AC010538.1	-0.403963	0.288135	0.869816	NA	-1.03122	-0.41167	0.960502	0.131193
AC010542.2	0.0785805	2.14462	0.66852	NA	-0.0161418	-0.351757	0.121686	0.394318
AC010615.2	0.048991	2.27125	0.32985	NA	-0.529252	-0.366011	1.10266	-0.0497409
AC010618.3	-0.916493	1.74007	3.09062	NA	-1.12575	-0.100762	0.708095	0.0786796
AC010623.1	0.105082	3.16802	0.734051	NA	-0.109649	-2.83839	-0.235568	0.0767939
AC010624.2	0.467143	0.345541	0.817236	NA	0.744017	-0.380643	-0.779365	0.051097
AC010624.5	0.168588	0.133127	0.229348	NA	3.85324	0.143679	-0.0334275	-0.484196
AC010632.1	0.276989	0.459396	0.341073	NA	1.06456	-0.45478	-1.19467	-0.334542
AC010632.2	0.0637208	0.798502	0.18977	NA	-2.02062	0.182202	-0.162479	0.669465
AC010638.1	-0.101117	0.685786	0.686382	NA	-1.05936	-1.22623	0.142421	0.282683
AC010642.2	0.482042	0.534236	0.15277	NA	0.180748	-0.111947	-2.07159	-0.00744638
AC010649.1	-0.257714	0.439718	0.336244	NA	0.129119	-0.783894	1.16204	0.512376
AC010680.1	-0.127606	-0.919097	-0.138573	NA	0.035247	-0.327765	0.068262	0.365883
AC010735.2	0.116232	-0.424071	-0.153261	NA	0.888879	0.752646	-0.0330345	0.23348
AC010754.1	0.357681	0.682429	0.684567	NA	-0.454959	-0.300488	-0.190291	0.235232
AC010789.2	-0.17857	0.251943	0.410064	NA	0.501246	-0.245563	-0.368622	0.368188
AC010809.1	-0.311017	1.20434	0.955617	NA	1.32542	0.509908	0.379318	0.47868
AC010809.2	0.0708842	2.14741	0.269052	NA	-0.735112	-0.116299	0.494555	0.928633
AC010864.1	1.23792	-0.533862	0.16707	NA	3.84069	-1.94389	-3.52814	-0.497251
AC010884.1	0.191331	0.0191469	0.166794	NA	-0.550398	-0.275411	-0.0141918	0.255837
AC010889.2	-0.120121	0.266431	-0.480287	NA	0.10359	-0.21012	-0.292089	-0.0146537
AC010894.3	-0.674953	0.422556	0.55011	NA	-0.224897	-0.999844	-0.579456	0.136282
AC010913.1	1.75201	-0.372504	-0.931165	NA	1.33161	-0.0996215	-0.66582	-0.150822
AC010967.1	0.159052	-0.172263	-1.3057	NA	-0.0477954	0.25475	0.100859	0.735936
AC010969.2	-0.0164621	0.291652	-0.104404	NA	0.108067	-1.00942	-0.0685867	0.433195
AC010974.2	-0.0658996	0.83099	0.418345	NA	-0.202494	0.250486	0.314968	0.313615
AC010976.1	0.0930943	1.4106	0.736032	NA	-1.73409	0.00877481	0.216587	0.414643
AC010978.1	0.0720035	1.53233	0.575739	NA	-0.194537	-0.548925	0.380354	0.323701
AC010991.1	-0.727483	0.0957444	0.615995	NA	-1.14157	1.05447	0.952987	1.23508
AC010997.3	-0.30471	1.40131	0.142787	NA	-0.779067	-0.133335	3.6006	0.722967
AC010997.5	0.695392	0.928647	0.728576	NA	-0.0393898	0.24835	-0.227669	-0.165004
AC010999.2	0.213599	0.444532	0.501202	NA	0.744904	-0.876531	-1.16927	-0.0103
AC011029.1	-0.626927	1.73089	1.94126	NA	0.11509	0.341582	0.416825	-0.702303
AC011043.1	-0.325695	0.0937161	-0.459682	NA	-1.29193	-0.508817	0.015166	-0.428802
AC011092.2	0.0841288	2.26305	0.950732	NA	-1.57445	0.0760691	0.4628	0.523083
AC011092.3	-0.0061358	0.909638	0.676498	NA	0.222743	-0.426466	0.312391	0.763839
AC011124.1	0.199405	1.06883	0.095749	NA	-0.0411729	-0.0507533	0.801944	0.100363
AC011246.1	0.305186	0.445829	0.446354	NA	-0.737437	0.0276448	0.392936	-0.0547471
AC011287.1	-0.0632157	-0.336128	-0.755988	NA	-0.0384977	-0.459711	1.37917	0.232099
AC011290.1	0.827051	-0.523421	0.0438509	NA	2.88715	-0.0914003	0.336917	-0.730608
AC011346.1	-0.385101	-4.26774	-0.584836	NA	-0.248826	-0.113085	0.612202	-0.0352016
AC011369.1	-0.00940895	1.21051	0.805389	NA	-0.408629	0.14434	0.186923	0.834154
AC011370.1	0.0530734	1.1596	0.519238	NA	-0.259543	-0.721791	-0.128084	0.0508531
AC011379.2	-0.0477173	1.53867	0.0495733	NA	-0.219291	0.226387	2.56853	0.802224
AC011405.1	-0.0137494	1.54203	0.908572	NA	-3.27745	0.0557904	1.66562	0.916703
AC011416.4	0.866524	-0.490042	-0.575299	NA	-0.0617451	0.0410766	0.175812	0.569987
AC011442.1	-0.0445808	1.37679	0.219824	NA	-0.696516	0.466901	0.820918	0.263362
AC011443.1	0.391829	1.43781	0.342827	NA	-0.428884	0.141314	-0.177052	0.790995
AC011444.1	-0.398674	-0.655523	-0.23694	NA	0.0852255	-0.985083	-0.0273374	0.00409121
AC011444.3	-0.0400122	1.40943	0.409878	NA	0.6582	0.0691707	0.359828	0.151177
AC011447.3	-0.964865	-0.161883	-0.394889	NA	-0.69637	-0.704407	0.396601	0.914647
AC011450.1	-0.75052	-6.92249	-0.0429129	NA	0.184329	0.434916	1.00945	-0.0190247
AC011451.3	0.303469	0.447523	0.438985	NA	-0.436457	-0.943013	-0.574823	-0.316558
AC011455.6	-0.33866	2.93931	1.31574	NA	-1.60548	-0.213972	1.61982	1.27963
AC011466.1	0.55723	-0.196144	-0.181284	NA	-0.312561	-0.372465	-0.27803	-0.0798529
AC011466.3	0.106838	1.83379	0.752515	NA	-0.993062	-0.440858	0.615561	0.610665
AC011468.1	0.266357	-0.0992466	-0.466978	NA	-0.603428	0.390415	0.0646218	-0.857186
AC011468.5	2.4459	-0.266808	-0.520277	NA	1.20809	0.00834837	-0.994329	-0.470666
AC011471.2	0.073355	1.43649	0.977644	NA	-0.179402	-1.15378	-0.929408	0.510993
AC011472.1	-0.21223	0.0488909	-0.0258048	NA	-0.992941	-0.436114	0.0856159	-0.138511
AC011472.2	-0.403912	0.130508	0.136903	NA	1.16184	-0.406505	0.341243	0.260109
AC011474.1	-1.01622	1.08316	1.21712	NA	-0.0983187	0.541784	1.43041	-0.109167
AC011476.3	-0.171446	0.937002	0.0678897	NA	-0.367737	-0.0644139	1.07	0.250325
AC011477.9	0.114929	1.02952	0.471675	NA	-0.605944	0.348145	0.434853	0.318563
AC011478.1	1.6467	4.73455	2.95301	NA	3.16671	0.416819	0.209047	0.836741
AC011481.1	-0.396622	0.0568825	-0.0785366	NA	-0.27795	-2.38824	-0.0510593	-0.111615
AC011498.1	-0.424019	-0.0154062	0.456757	NA	2.16705	0.789279	0.219517	0.4008
AC011503.1	-0.11821	1.6283	0.780972	NA	0.385483	-0.0569642	0.176847	0.397032
AC011509.2	-3.51676	-2.27006	-0.474702	NA	-0.147091	-0.596003	0.205485	0.0780573
AC011511.2	0.0277295	0.68956	0.196136	NA	-0.345131	-0.267658	0.431714	0.437827
AC011586.2	-0.115762	-0.207061	-0.0844737	NA	0.995641	0.0226443	-0.50436	0.632064
AC011603.2	-0.801028	-0.59869	0.0815341	NA	-0.174508	1.2983	3.83121	0.599485
AC011611.4	-0.00712773	1.4402	0.727418	NA	0.153605	0.394633	-0.411188	-0.0458734
AC011700.1	-0.00872426	-0.562374	-0.265161	NA	0.674034	-0.0258281	0.321919	0.264245
AC011815.2	0.352859	-0.0953706	0.245119	NA	1.42666	-0.181801	-0.0785945	-0.0717243
AC011824.1	-0.135826	1.11034	0.47376	NA	-1.26993	-0.718447	0.655169	0.528753
AC011824.2	0.0128411	1.49526	0.800035	NA	-1.70519	0.16452	0.644722	0.726347
AC011824.4	-0.00129907	1.8964	0.695383	NA	-0.993249	1.18617	0.696963	0.997353
AC011825.2	-0.393984	0.928073	0.558547	NA	-1.12264	0.0494017	0.492859	0.0408428
AC011900.1	0.0274871	1.56995	0.59677	NA	-0.866028	-0.00106663	0.188545	0.807972
AC011933.4	0.0301908	1.63761	0.79634	NA	-1.27524	0.875367	0.949343	0.598079
AC011939.2	-0.0822458	0.266995	0.344712	NA	-0.0288678	-0.426077	0.344126	-0.305472
AC011944.1	0.126913	1.75167	1.00716	NA	-0.174401	-0.223283	0.28316	0.213811
AC011995.2	0.0544099	0.0629058	0.00750693	NA	-0.0268365	0.483413	0.260637	-0.396876
AC011997.1	-0.890069	-0.0596514	0.501416	NA	-0.293926	-0.442913	0.1768	0.0237606
AC011997.2	0.0189796	1.54926	0.401628	NA	-1.03739	-0.0548083	0.242086	0.766597
AC012020.1	-0.646264	0.263893	0.310825	NA	1.84232	-0.464262	-0.305281	-0.229751
AC012050.1	0.0604568	3.00934	1.23863	NA	-3.9747	0.0087241	0.735259	-0.256984
AC012063.1	-0.680902	-2.06315	-0.932671	NA	0.754947	-0.989296	0.0161759	-0.791507
AC012074.1	-0.300723	2.27362	1.29045	NA	1.37903	0.168137	0.804809	0.265741
AC012076.1	-0.178848	0.609105	0.291763	NA	-2.16809	-0.719627	0.393055	0.463716
AC012085.2	0.0703537	1.60338	0.919771	NA	-2.83288	0.179637	0.0244474	0.286549
AC012146.1	0.0558417	-0.606307	-0.286231	NA	2.58287	0.559485	-0.89882	-0.20963
AC012178.1	-0.677542	0.872015	1.2239	NA	-2.11558	-0.185813	0.205704	-0.0040353
AC012184.1	-0.0786998	2.04484	0.57277	NA	-0.476546	-0.210304	0.676756	0.560988
AC012184.3	-0.00674424	3.20855	1.13946	NA	-0.81951	0.536849	1.52948	0.902201
AC012184.4	0.230467	2.59811	1.59432	NA	-1.19185	0.331879	0.719804	0.664919
AC012213.1	-0.102248	-0.133324	-0.0901896	NA	0.268172	-0.227897	0.531147	-0.133116
AC012213.4	0.734088	1.22349	0.452705	NA	0.0799071	0.589027	-0.334497	0.0279219
AC012254.1	-0.0709439	0.816384	0.70465	NA	0.487915	0.0156082	1.64375	0.799872
AC012291.3	-1.78274	-0.616031	0.219164	NA	-0.287587	-0.805024	0.806861	0.12339
AC012313.6	0.374858	0.931837	0.424475	NA	-1.07805	-0.022745	0.175503	-0.187874
AC012354.1	-0.0856864	-0.151722	-0.379791	NA	0.332161	-0.283441	0.171814	0.285931
AC012355.1	-1.24382	0.296279	0.0719377	NA	-0.392489	-0.465114	-0.0954952	-0.398567
AC012358.3	0.0283497	1.3467	0.675159	NA	-1.73348	0.221939	1.8253	0.385627
AC012360.3	0.473796	0.994578	0.595798	NA	1.14684	0.3557	-0.80014	-0.738133
AC012363.1	0.253497	0.131633	0.0788431	NA	-0.503607	-1.01336	-0.437876	0.164641
AC012370.2	0.438255	1.12032	1.23491	NA	-4.15687	0.983484	2.01835	0.223888
AC012404.1	0.042624	1.10139	0.790149	NA	-0.642416	0.0105549	0.100081	0.600877
AC012404.2	0.0357201	0.701429	0.347805	NA	-0.147315	-0.348564	0.0745707	0.487288
AC012405.1	-0.574552	1.46412	0.46757	NA	-0.0900634	-0.138334	0.849007	0.525626
AC012409.2	0.185352	2.31696	0.714643	NA	-1.99031	-0.236641	1.52762	0.0785837
AC012414.5	-0.691999	-0.711921	0.819332	NA	-0.290397	-0.392894	0.298721	-0.196335
AC012442.2	-0.479707	-0.636684	0.0251875	NA	0.573305	0.451342	0.147147	-0.067386
AC012447.1	-0.118985	1.42318	0.183606	NA	-0.190398	0.702964	0.132326	0.0763766
AC012459.1	0.141127	0.57543	0.26478	NA	-0.771419	-0.170976	0.00846004	0.195478
AC012464.1	0.0164991	1.34704	0.797091	NA	-1.38269	0.248438	0.286969	0.849304
AC012467.2	-0.0997568	0.0835302	0.781295	NA	0.00710902	-0.830994	-1.45762	-0.0104405
AC012499.1	-0.184456	0.329377	0.260345	NA	1.11724	0.342588	0.10667	0.618637
AC012501.2	-0.251124	1.1532	1.3221	NA	-0.175084	0.6299	3.04892	-0.0114657
AC012508.2	0.26153	0.363716	0.610111	NA	9.42322	0.739595	-0.484125	-0.0894014
AC012535.1	0.669351	1.05514	-0.207298	NA	-0.712156	-0.399701	1.31148	0.827385
AC012613.1	-0.684629	0.12781	-0.28163	NA	-1.15659	0.258024	0.114691	0.0663978
AC012615.1	1.72733	0.17312	-0.155007	NA	5.16277	-0.0901421	-3.3038	-0.166723
AC012636.1	0.0240971	1.27625	0.462655	NA	0.0115857	0.608034	0.320406	0.940762
AC012645.1	0.0741845	0.899635	0.308197	NA	1.57638	0.194157	-0.506236	0.00761782
AC013267.2	0.0686318	1.64943	0.990416	NA	-1.35757	-0.0130271	0.984982	0.717045
AC013287.1	-0.241369	1.12255	0.985835	NA	-0.183048	-1.73795	-0.888973	0.57907
AC013460.1	0.089045	0.233217	-0.0182674	NA	0.219029	-0.0262668	1.98998	-0.335336
AC013472.1	0.195307	1.42249	0.0952768	NA	-0.105679	-0.107924	0.298295	0.176139
AC013472.2	0.507954	1.46076	0.715576	NA	0.10042	0.175445	0.195104	0.0519961
AC013562.1	-0.91139	0.0879868	0.345618	NA	0.60166	1.62048	0.175918	-0.35208
AC013640.1	0.10333	1.59764	0.938217	NA	-0.97629	-0.642384	0.212609	0.144405
AC013643.2	0.0558279	1.01173	0.0703856	NA	-0.516935	-0.77381	0.527635	0.541347
AC013652.1	-0.309308	0.14805	-0.239061	NA	-1.55846	1.15875	2.81662	0.384951
AC013731.1	0.715714	0.880587	0.333298	NA	1.31505	-0.459776	-0.80875	0.0514764
AC015522.1	-0.306868	2.17376	0.389357	NA	-0.992676	0.342858	0.216358	-0.292956
AC015795.1	-0.183546	0.23449	0.17561	NA	-1.27636	-0.186274	0.232912	0.402577
AC015813.1	0.878019	-0.473609	-0.843627	NA	-0.49684	0.449045	0.794409	0.182801
AC015845.2	-0.755206	-1.5471	0.159274	NA	3.61656	-0.0478007	-0.719129	-0.371239
AC015849.3	0.0364285	1.54009	0.956845	NA	-0.620037	-0.383172	0.187258	0.293319
AC015849.4	-0.463907	0.066038	0.151864	NA	1.77438	-0.296669	-0.0291142	0.380559
AC015853.2	-0.121701	0.742961	0.197733	NA	0.474071	1.79736	1.77618	1.47724
AC015853.3	0.132649	2.22129	0.764119	NA	-0.477796	0.330055	1.44963	0.577433
AC015871.1	-0.393501	1.52676	0.731062	NA	2.69018	0.224764	-0.266183	0.307963
AC015871.4	1.6091	0.00481937	0.0898612	NA	0.591039	-1.64341	-0.718779	-0.188351
AC015871.7	-0.229797	0.961418	0.160515	NA	-0.201661	0.476124	0.165396	1.1725
AC015878.1	0.0519694	2.15239	0.708058	NA	-1.92643	-0.451696	0.71226	0.614862
AC015908.3	-0.6744	0.227344	0.326907	NA	0.0191203	0.506	1.00953	0.915669
AC015909.2	1.17036	-0.742376	-0.0224914	NA	3.04292	-0.00277794	-1.16187	-0.86943
AC015922.3	-0.12327	0.0864761	0.28005	NA	0.770548	-1.05159	-2.31406	-0.00759037
AC015923.1	0.0342561	1.40282	0.826448	NA	-3.10616	0.265575	1.18544	0.776761
AC015943.1	-0.0224661	-1.45881	-0.912226	NA	0.458533	0.0312846	2.90455	0.253036
AC015961.1	0.234109	2.4358	0.204764	NA	-0.0364741	0.224973	1.14292	0.585461
AC015961.2	0.0182564	1.32836	0.173126	NA	0.039976	0.0600875	0.533073	0.326225
AC015971.1	0.386952	2.95074	0.903367	NA	-0.782561	-0.207184	0.319452	0.303547
AC015982.2	0.12893	-0.222054	-0.324253	NA	0.0323157	-0.543581	-0.64697	-0.0977931
AC015983.2	0.219681	-2.22376	-0.155398	NA	-0.200715	-0.437561	-0.236204	0.0585576
AC015987.1	-0.110854	2.24024	1.93318	NA	-0.633774	-0.0186421	0.344618	0.158824
AC016026.2	0.0778878	1.44387	0.765985	NA	1.81689	-0.473508	0.27279	0.390529
AC016027.2	-0.734825	-3.77248	-1.82929	NA	-1.26201	0.654025	1.5355	0.343049
AC016042.1	0.130003	1.83938	0.774106	NA	-2.69129	-0.0591719	0.381541	0.530284
AC016065.1	2.31944	0.535983	0.286162	NA	1.74129	0.0164564	-2.82707	-0.135847
AC016168.2	0.00323999	0.187343	0.264464	NA	0.665779	0.370062	-0.290422	0.453054
AC016394.1	1.2588	-0.138088	-0.0571615	NA	0.0879195	0.386613	-1.04062	-0.620323
AC016493.1	0.0573391	2.04332	0.698193	NA	-0.850994	-0.116318	0.460314	0.230279
AC016583.2	-0.214711	1.57496	-0.034436	NA	-0.426983	-0.0870663	0.176636	-0.179407
AC016588.2	0.0322913	-1.63323	-0.389936	NA	0.241392	-0.0705915	-1.02439	-0.0409753
AC016590.1	0.0473353	2.04771	0.974794	NA	-3.83511	0.0284202	0.949654	1.07102
AC016596.1	-0.153481	-0.656192	-0.139183	NA	1.51701	-1.00606	-0.274639	0.0246079
AC016597.1	0.0294194	1.19226	0.80537	NA	-1.10722	0.65528	0.480736	0.615576
AC016642.1	0.00598717	1.38159	0.81627	NA	-1.29476	-0.506124	0.231254	0.30046
AC016644.1	0.379506	1.44211	0.398045	NA	-1.2249	-0.0102093	0.019201	0.64113
AC016650.1	-0.038147	1.34392	0.415249	NA	-2.11704	-1.56805	0.0718342	0.845524
AC016705.2	-2.79554	-5.37451	-0.520481	NA	0.294926	1.0045	0.830237	-0.216012
AC016716.2	-0.0864554	2.39519	1.37812	NA	-2.45509	-0.0391727	0.0733671	0.525284
AC016717.2	0.212197	-1.10614	-0.723926	NA	2.15429	-0.739767	-3.02133	-0.412848
AC016722.2	0.0877961	1.00002	0.353198	NA	-0.526214	-0.291192	0.0323379	0.412785
AC016723.1	0.030832	1.35746	0.634338	NA	-1.64751	-0.933361	1.51424	0.821655
AC016727.1	-1.92081	-1.38782	0.0140424	NA	0.00370131	0.787901	-0.00478397	-0.128888
AC016745.1	0.00671216	2.82912	0.133491	NA	-0.216456	1.77052	0.910079	1.58553
AC016745.2	-0.643495	1.89361	1.14088	NA	0.465665	0.0368269	0.471633	0.471918
AC016747.1	0.15083	0.0462385	0.083012	NA	0.438998	-0.104814	-0.233478	-0.291897
AC016747.2	0.0691741	1.27903	0.446189	NA	-1.60481	0.0330722	0.438418	0.22472
AC016773.1	0.491758	2.08564	0.925956	NA	-3.52069	0.0722278	0.259914	0.242603
AC016821.1	-0.66102	0.121755	0.29894	NA	-0.00504543	3.20924	0.931904	0.211866
AC016831.1	1.37191	0.0146146	-0.0723474	NA	0.514626	-0.304186	-0.19408	-0.0739204
AC016831.5	0.00997347	0.925349	0.949088	NA	0.96604	-0.0340996	0.480672	-0.36638
AC016831.7	0.454749	-1.18572	-0.0494401	NA	1.47245	-0.021492	-0.470574	-0.548971
AC016866.2	0.0759004	1.5943	0.532734	NA	-0.45499	-0.430949	0.115756	0.268814
AC016876.1	0.684713	-0.111129	-0.0466546	NA	0.368233	-0.637948	-1.21596	-0.510832
AC016885.2	-0.272843	1.13574	0.999537	NA	-0.678289	-0.554231	0.553357	0.703444
AC016907.2	-0.0127127	-2.53312	-0.405646	NA	0.00652467	0.377046	3.13489	-0.0970991
AC016910.1	0.00638271	0.744435	0.305939	NA	-0.144281	0.171425	0.250521	0.523912
AC016931.1	0.160476	-0.123087	-0.0236587	NA	0.582933	0.0564392	0.534449	0.0447498
AC016949.1	-0.356934	0.019155	0.0169586	NA	-1.40729	0.123519	1.99877	0.332193
AC016994.1	0.238906	1.28868	0.355372	NA	-2.29475	0.0270142	0.417284	0.491086
AC017028.1	0.0773573	2.85581	0.513237	NA	-0.42861	0.449171	0.295233	0.256031
AC017050.1	0.268568	0.637627	0.294024	NA	-0.0677779	-0.0263323	-0.348352	0.00311913
AC017071.1	-0.163654	-0.271742	0.0487222	NA	0.441342	0.0668723	0.2601	-0.0842063
AC017074.1	-0.578177	-0.268132	-0.0223146	NA	0.310947	-0.395319	0.0194921	-0.172017
AC017083.1	0.131643	-1.16447	-0.599632	NA	1.16464	-0.170649	-1.48439	0.0993942
AC017101.1	0.0251953	1.27642	0.653097	NA	-0.357929	0.00233955	1.19173	0.39115
AC018362.1	-0.121128	0.680373	0.659937	NA	-2.72311	-0.229649	0.128798	0.353144
AC018450.1	0.150858	0.652935	0.51056	NA	-0.577394	0.0318273	0.4579	0.404569
AC018462.1	0.0749624	1.42736	0.893257	NA	-2.30727	1.02986	2.05491	1.17572
AC018511.2	-0.0667382	1.61445	0.844348	NA	-1.34379	0.620346	0.947903	1.55339
AC018521.5	0.120355	0.75408	0.0605156	NA	-0.182665	-0.206223	0.229563	-0.0615254
AC018557.1	0.0319402	1.19165	0.322111	NA	-1.3768	0.0917143	0.25458	0.0394295
AC018557.3	0.0175586	1.44591	0.908595	NA	-1.35856	-0.180866	0.241612	0.517604
AC018628.2	-0.0784945	1.71799	1.33023	NA	-1.27712	-0.0536123	0.292601	0.656466
AC018638.6	0.086062	-0.916151	0.097439	NA	0.72642	0.258671	0.156829	0.468818
AC018638.7	0.0244406	0.856466	0.197831	NA	-0.445113	-0.650625	0.0267233	-0.563174
AC018645.3	1.23503	-0.35446	-0.182113	NA	0.79439	0.479882	-0.428873	-0.201241
AC018647.2	0.6056	0.425382	0.109472	NA	1.90558	0.0539511	-0.637031	-0.36905
AC018653.3	0.171077	0.34146	-0.0413188	NA	-0.014724	0.0342906	0.113387	-0.00339351
AC018680.1	-0.436464	-1.70303	0.0821776	NA	0.00104072	0.411008	-0.112574	0.329
AC018682.1	0.051157	1.33012	0.785333	NA	-0.470669	-0.132971	0.207254	0.104061
AC018697.1	-1.19707	0.045864	0.194189	NA	1.00782	0.0755132	0.169551	0.730841
AC018730.1	0.024139	0.299654	0.770337	NA	0.135458	0.180393	0.11453	-0.473295
AC018742.1	0.205648	0.291902	-0.081336	NA	-0.315941	-0.301777	0.0386332	0.130479
AC018752.1	0.00187487	2.42246	0.925577	NA	-0.846482	0.934411	0.154572	0.740262
AC018754.1	-0.0878019	-1.22876	-0.300466	NA	0.0578755	0.104395	0.00869676	0.0379518
AC018761.2	-0.0946941	1.95432	0.84657	NA	0.726011	0.297326	0.260217	-0.22173
AC018797.3	0.0480783	0.70444	0.527396	NA	-0.778429	-0.95188	-0.36539	0.151896
AC018816.1	-1.27187	0.230323	0.325289	NA	0.837086	0.981433	0.946985	0.312073
AC018832.1	-0.0172855	1.13792	0.458157	NA	-0.852241	-0.0762553	0.425073	0.777596
AC018878.1	0.0231495	1.532	0.284835	NA	-1.29505	-0.080718	-0.188177	-0.0587918
AC018904.1	0.554508	2.07035	0.713952	NA	-0.324724	1.07258	-0.286853	0.12609
AC018953.2	0.570322	0.744163	-0.0485814	NA	-0.844359	-0.565171	0.296754	-0.118689
AC019068.1	-0.0940558	0.423755	-0.058793	NA	-0.232314	0.576692	2.87665	0.0637341
AC019077.1	-0.768557	0.595237	0.154092	NA	0.161852	0.106648	0.0790391	-0.183316
AC019080.1	-1.08817	-1.66094	0.049154	NA	-0.571633	0.08485	0.491569	0.219944
AC019080.5	0.230037	1.46572	0.56938	NA	-0.452055	-0.489641	0.197774	0.598139
AC019118.2	0.135099	1.43821	1.35288	NA	1.80393	0.857633	-0.225407	-0.198009
AC019130.1	0.17825	1.94016	0.899641	NA	-4.32819	1.03365	0.732051	0.697325
AC019131.1	0.00352042	-2.33612	-0.463624	NA	0.934647	-0.147038	-0.441049	-0.294703
AC019155.2	0.0134126	1.4023	0.490882	NA	-0.471458	-0.961855	-0.262512	0.345578
AC019163.1	0.0856205	1.56539	0.840907	NA	1.9408	-0.121805	-0.116585	0.106573
AC019197.1	-0.0172557	2.12043	0.452658	NA	-2.83506	-0.0655185	1.60842	0.652754
AC019205.1	-0.552036	-0.293425	-0.337466	NA	-1.11274	0.52479	3.31473	0.902806
AC019257.1	-0.0194915	1.0907	0.559739	NA	-0.110235	-0.845605	0.0280782	-0.102578
AC020584.1	0.322637	0.0667059	-0.420383	NA	-1.40852	-0.417927	0.0562246	1.09388
AC020594.1	0.0473402	1.28584	0.300402	NA	-1.05881	-0.0909787	1.70282	-0.386223
AC020611.2	0.0418005	1.34965	0.682083	NA	-0.169776	-0.00044732	0.0106288	0.333071
AC020637.1	-0.151308	-0.364749	0.292774	NA	1.48903	0.470259	0.509098	-0.0910494
AC020661.2	0.424336	1.84442	1.72099	NA	-2.12617	0.282875	0.394363	0.346678
AC020661.3	-0.0811321	1.36181	0.767113	NA	-1.37168	1.14634	1.27805	0.945051
AC020687.1	-0.437599	0.441612	0.393876	NA	-0.206814	-0.570051	0.449645	-0.0211257
AC020741.1	0.634454	1.20182	0.409497	NA	-3.84194	0.0130706	0.627677	0.502551
AC020779.2	0.589339	1.21813	0.305031	NA	-0.187264	0.115035	1.71038	0.428939
AC020892.2	0.33499	1.53475	1.16118	NA	-1.89125	-0.0253632	0.385285	0.162134
AC020908.1	0.0401242	0.734402	0.371802	NA	-0.410767	-0.577076	-0.00662815	0.688262
AC020909.2	-0.465369	-0.223238	0.0088212	NA	0.00478689	-0.190738	0.181307	0.233875
AC020910.5	1.08866	-0.309931	-0.753345	NA	1.68645	0.446643	-0.992172	-0.574169
AC020911.2	-3.56042	-1.27926	0.122387	NA	-1.14625	-0.180637	0.280912	0.243208
AC020913.1	-0.228311	1.95577	0.949025	NA	0.0881937	0.0030797	0.383306	0.192902
AC020915.2	0.270219	0.625588	-0.0434594	NA	-0.616674	0.329034	0.345017	0.835138
AC020917.2	-0.060276	0.823422	0.362164	NA	-0.752957	-0.282694	-0.336168	0.357694
AC020928.1	0.205416	0.52898	0.295369	NA	3.86067	0.0997713	-2.8433	0.0658289
AC020930.1	0.227877	0.347424	0.268846	NA	-0.157485	0.879423	-0.0740694	-0.169744
AC020978.3	0.173412	3.3006	0.390208	NA	-1.11254	-0.295078	0.169558	0.0163364
AC021054.1	0.266265	-0.474383	-1.46231	NA	2.63664	0.141856	0.439551	-0.379209
AC021086.1	0.0453596	-2.25603	-0.469188	NA	-0.516763	-0.0314033	0.46469	0.0198357
AC021092.1	0.897531	-0.050801	-1.27022	NA	1.37051	-0.323461	-1.59686	-0.299668
AC021097.1	-0.029971	1.80118	0.830831	NA	-0.198893	-0.549951	0.280216	-0.0577312
AC021127.1	0.206228	-1.01833	-0.299143	NA	1.08641	-0.51979	-0.487901	-0.162225
AC021205.3	-0.0893763	-0.236697	0.0269566	NA	-0.476837	0.516062	0.738476	0.223581
AC021231.1	-0.366869	-0.081617	0.263556	NA	-0.498962	0.229912	4.57937	0.373522
AC021321.1	0.0892614	-0.681232	0.0068928	NA	2.81332	0.0243464	-1.62763	-1.60205
AC021351.1	-0.336458	0.0406973	0.340419	NA	-0.398149	-0.114857	0.0358134	0.238124
AC021491.1	0.30734	0.542474	0.879647	NA	-0.352143	-1.01443	-0.166001	0.124647
AC021504.1	-0.149563	-0.588191	0.028248	NA	1.35941	0.268322	-0.343931	0.136786
AC021594.2	-0.57484	-1.62441	-0.442178	NA	0.44122	-0.225245	0.103154	-0.146936
AC021613.1	-0.723155	0.179549	0.481233	NA	0.0259869	-0.959938	-0.561985	0.257509
AC021683.3	-0.0873397	0.4527	-0.0641302	NA	0.0518669	-0.365288	-0.0341417	0.285073
AC021723.2	2.19508	0.226803	0.333043	NA	0.0468743	0.383024	-0.0440379	-1.37877
AC021733.4	0.150753	-0.688688	-0.136051	NA	0.875403	-0.217906	-0.409519	-0.00436623
AC021752.1	0.0212661	-0.0957502	0.146948	NA	2.5088	-0.316847	-0.120876	-0.285476
AC021851.1	-0.959248	-1.37262	0.394966	NA	-0.472277	-0.256638	-0.0475489	-0.16932
AC021851.2	-0.0804805	-2.29344	-1.05059	NA	0.220014	-0.351364	1.18566	-0.176712
AC021915.2	-0.105964	0.406266	0.314871	NA	-0.4379	-0.0741381	0.129699	0.255677
AC022075.1	1.07754	0.0475957	-0.270501	NA	1.2279	0.115155	-0.490069	0.286681
AC022087.1	-0.056376	0.444988	0.305217	NA	-1.26371	-0.876182	-0.160694	0.722466
AC022098.1	0.0159264	1.03038	0.305187	NA	-0.016411	1.00134	0.72056	0.869102
AC022126.1	0.0567607	-0.440681	0.204303	NA	-0.592993	-0.351931	0.209222	0.0144247
AC022137.4	0.0570511	5.1473	2.93514	NA	-0.532468	-0.152265	-0.026125	0.0945004
AC022146.2	0.0137474	2.59099	0.518306	NA	-1.31551	1.0364	4.15205	0.827768
AC022148.1	-0.715223	-2.44823	-0.0395109	NA	-0.322021	-0.523738	-0.285744	0.130994
AC022154.1	-0.477469	0.313692	0.158954	NA	-0.500179	-0.322038	0.44108	0.313588
AC022166.1	-0.013758	1.38914	0.00699986	NA	-0.541838	-1.02644	0.00297697	0.571182
AC022167.2	-0.937639	0.0906197	0.25362	NA	1.84125	0.292243	0.568065	0.272418
AC022182.1	0.111285	-1.31454	-0.823105	NA	-0.948553	-0.133454	0.527369	-0.00270272
AC022210.2	0.0986566	3.11103	1.27359	NA	-1.13635	0.00058981	0.659812	0.973046
AC022217.3	0.152791	1.10366	0.362246	NA	3.67247	0.323645	-0.15205	0.893953
AC022272.1	0.318328	1.99036	1.07763	NA	0.0199452	0.0266871	-0.31697	0.362109
AC022306.2	2.64476	-0.0374507	-0.0548832	NA	0.250819	-0.25821	0.0181999	-0.484533
AC022325.2	0.274669	-0.318317	0.20802	NA	2.7209	0.621892	0.40149	-0.114707
AC022364.1	0.0823492	-1.17535	-0.248034	NA	-0.0253768	-0.562146	-0.806862	-0.592032
AC022382.1	3.14086	-0.190587	-0.229598	NA	3.66967	0.0163387	-2.96903	-2.99654
AC022382.2	0.23091	1.23214	0.393872	NA	-0.367789	0.144213	0.601508	-0.0295747
AC022395.1	0.131435	1.08469	0.815359	NA	-0.861153	-0.163585	0.101268	0.408023
AC022400.4	-0.249133	0.84552	0.654047	NA	-0.562747	-0.422756	0.817348	0.452376
AC022424.1	0.37533	1.02742	0.947213	NA	-1.88594	0.626896	0.902784	-0.5291
AC022469.1	0.0391997	0.860109	0.405044	NA	-0.516666	-0.523948	-0.346066	-0.953798
AC022469.2	-0.0320414	1.18584	0.624908	NA	0.0893166	0.0235123	0.495834	0.50128
AC022523.1	0.408794	0.659569	0.523797	NA	-0.980296	-0.541562	0.38428	0.157398
AC022540.1	-0.0343014	1.2708	0.386102	NA	-2.203	-0.480998	0.38929	0.677074
AC022558.2	0.1234	2.0508	0.817095	NA	-2.02731	-0.0998732	0.485989	0.848162
AC022601.1	0.0331974	0.651708	0.503351	NA	0.392625	-0.035604	0.454501	0.287782
AC022613.2	-0.0705052	1.71583	1.1523	NA	-0.231399	-0.0892961	0.524929	0.483865
AC022613.3	-0.0884044	-0.116133	0.091797	NA	-0.0115399	-1.27837	0.969495	0.251842
AC022655.1	-0.352925	1.865	1.63093	NA	-2.66305	-0.263862	0.906899	-0.0897392
AC022679.2	0.047779	1.78874	0.948819	NA	-3.03899	0.380628	0.772778	0.634535
AC022762.2	-0.759129	-1.01668	-0.0208388	NA	0.477294	0.0362529	-0.393365	0.279325
AC022784.1	0.258691	-0.165068	-0.0866282	NA	2.27399	0.347844	0.096089	-1.52215
AC022809.1	1.02801	0.225558	0.228376	NA	2.78698	0.048684	-1.0665	-0.387342
AC022858.1	-0.440674	-0.259125	-0.0104229	NA	-0.695218	-0.0922891	0.282855	-0.0226231
AC022872.1	-0.0505727	1.0311	0.519684	NA	-3.33616	-0.225202	0.567119	0.360514
AC022893.1	-0.218212	-0.311355	-0.00701367	NA	-1.33862	-0.0223319	-0.420048	0.321688
AC022893.2	-0.845094	-0.0404513	0.19853	NA	1.81069	0.0427855	-1.26513	0.0651897
AC022915.2	-1.10226	-1.70805	-0.321597	NA	-0.892773	-0.0944281	0.637239	-1.65081
AC022916.1	-0.378315	-2.11079	-0.100757	NA	0.321586	-0.450619	-0.239196	0.00511357
AC022960.1	0.0375445	2.14729	0.384668	NA	-1.99784	0.281644	0.725612	0.921828
AC022973.3	0.0999471	0.987994	0.279835	NA	-0.150024	0.0534269	0.799387	0.779521
AC022973.4	0.0220332	1.04479	0.6464	NA	-0.662159	-0.269841	0.270299	0.476
AC023051.1	-0.121804	1.20802	0.249147	NA	-1.43435	-1.33881	-0.500176	0.0850266
AC023095.1	0.867974	-0.204845	-0.757521	NA	-1.96574	0.127915	2.78294	0.1659
AC023154.1	0.459025	1.18758	0.512944	NA	-2.43503	-0.136664	0.11915	0.612107
AC023157.3	0.15465	0.266047	-0.160629	NA	2.79875	0.134754	-1.41058	-0.356587
AC023282.1	-0.369794	0.127358	0.173045	NA	-0.788958	-1.09801	0.430503	0.358079
AC023355.1	-0.180962	0.423812	0.294413	NA	0.0255611	-0.699107	-0.0181121	0.166807
AC023385.1	-0.00412654	0.790628	0.0641631	NA	-0.464415	-0.050821	0.552981	0.348732
AC023389.1	0.0159006	1.88319	1.01998	NA	-2.11608	0.278396	1.36673	0.814457
AC023421.2	-0.114004	0.418808	0.295104	NA	0.665764	-0.34997	1.60538	-0.0596795
AC023424.3	0.512966	1.9502	1.25637	NA	-4.6651	1.34456	0.784524	0.697319
AC023480.1	0.0163921	1.2886	0.1053	NA	-2.88197	-0.31564	2.67344	0.93359
AC023481.1	0.288625	0.637274	0.48033	NA	1.46398	-0.0441415	-0.185781	0.500501
AC023494.1	0.270125	1.50453	0.966918	NA	0.091337	-1.1397	-0.908395	0.462003
AC023509.6	-0.018038	2.33099	1.12821	NA	-3.74483	0.0976492	0.663033	0.445756
AC023590.1	0.0581118	1.10174	0.780011	NA	-1.22042	-0.196841	0.0480407	0.388311
AC023593.1	0.115159	-1.10649	-1.33304	NA	0.370705	-1.2414	-0.0618942	-0.178453
AC023632.2	0.00702366	-0.442826	-0.868094	NA	0.987896	0.11394	-0.71049	-1.66072
AC023790.2	-0.00587601	1.52375	0.46577	NA	0.578977	0.588131	1.41438	-0.243932
AC023886.1	-0.431491	0.265985	0.553463	NA	-0.174993	0.665365	1.4139	0.0983172
AC023905.1	0.355048	1.48747	0.770106	NA	-3.30528	-0.0496506	0.0246878	-0.0410954
AC023906.3	-0.36573	0.71071	0.0968234	NA	-0.463156	-0.283134	-0.401161	0.915131
AC023906.4	0.092131	1.71061	1.02214	NA	-0.264184	1.24673	1.32385	0.759684
AC023906.5	0.01427	1.1692	0.649663	NA	0.634456	0.428147	0.308377	0.251761
AC023983.1	0.466501	1.05108	0.8934	NA	-0.49915	-1.25992	0.569622	0.292752
AC024022.1	-1.04266	-0.0525451	0.212843	NA	0.0606355	0.564898	0.193801	0.421513
AC024060.2	0.205126	1.3283	1.38351	NA	-1.8774	0.16182	-0.0207389	1.09479
AC024075.1	-1.30099	-0.0300345	-0.0394792	NA	0.133126	-0.178393	0.778721	0.167433
AC024075.2	-0.181384	0.146134	0.274126	NA	-1.0291	-0.617591	-0.242394	-0.593132
AC024075.3	0.0707255	2.51699	0.366812	NA	-0.877632	-0.401561	0.244901	0.597417
AC024145.1	-0.122472	0.809212	0.29998	NA	0.506822	-0.166055	-0.0907443	0.746408
AC024257.1	0.0630023	0.751346	0.332614	NA	-0.679758	-0.378484	2.43036	0.697531
AC024257.3	0.277006	-1.55243	-0.778333	NA	0.133847	0.43599	3.60636	0.535737
AC024267.4	-0.00927619	1.26697	0.631708	NA	-0.303674	0.268445	0.563742	0.708597
AC024270.5	-0.688072	-1.37233	-0.349409	NA	0.0560453	-1.09941	0.272045	0.218576
AC024558.2	-0.174459	-0.307955	-0.0589674	NA	-0.586537	0.0564342	0.22234	0.508034
AC024560.4	-0.15438	-0.214498	0.0703349	NA	0.579905	0.159923	0.0230511	0.753946
AC024560.5	0.77026	6.09258	1.96743	NA	0.0551135	-0.87437	0.0802206	0.12283
AC024563.1	-0.743328	-0.535921	0.764224	NA	0.174691	-0.94318	-0.11134	0.497995
AC024588.1	-1.093	-0.710233	-0.701031	NA	0.573408	-0.168457	1.08387	-0.0834445
AC024597.1	0.661978	-1.06489	-6.14906	NA	-0.216823	-1.31134	0.978082	0.140058
AC024610.1	0.0269478	1.14177	0.24257	NA	-2.19715	0.010673	0.483879	0.918644
AC024610.2	-0.432747	-0.560349	-0.0368827	NA	-0.981705	0.573476	2.22983	0.272186
AC024614.4	-0.352791	-1.66534	-0.330321	NA	-0.931226	0.49385	0.944678	0.516463
AC024619.3	-0.0251617	1.42588	0.444577	NA	-0.576766	-0.528949	0.202646	0.174809
AC024901.1	-0.254838	-2.3757	-1.74896	NA	-0.165177	-0.0821688	1.48672	-0.239714
AC024996.1	0.167851	2.36854	1.3179	NA	-0.519288	-1.90701	0.110948	0.330585
AC025031.1	0.0760889	1.67107	0.41329	NA	-1.14563	-0.0214407	0.0614913	0.136512
AC025034.1	-0.0728717	1.32526	0.151974	NA	-2.63931	0.582595	0.823028	0.779276
AC025043.1	-0.13865	1.96549	0.698242	NA	-0.798387	-0.038685	0.974692	0.0390817
AC025048.2	0.276043	-0.726132	-0.103706	NA	1.61478	-0.240848	-0.956109	-0.0328195
AC025048.4	-0.309486	-1.89944	-0.109542	NA	0.135593	-0.188753	0.183861	-0.0643407
AC025159.1	-0.11633	-1.50532	0.00478247	NA	-0.186676	-0.0734303	3.992	0.347366
AC025164.1	0.394562	0.0619013	0.023152	NA	1.63583	-0.112999	-0.738618	-0.422956
AC025165.2	-0.410069	1.14198	0.46735	NA	-0.907303	-0.0255547	2.80427	0.72907
AC025171.1	-1.00815	-0.0142946	0.0838102	NA	0.829803	0.196477	0.729309	0.52621
AC025171.2	0.0324724	2.49627	0.405458	NA	-1.43686	0.40045	2.18211	0.858001
AC025171.4	-0.183017	2.23704	2.74183	NA	-0.429746	0.0566675	0.356982	0.349097
AC025175.2	-0.219853	2.41197	0.841695	NA	0.86772	-1.52388	0.0566078	0.853699
AC025178.1	1.33795	1.0948	0.593525	NA	0.223877	0.0469356	-0.286064	-0.250029
AC025181.2	-0.0748777	0.220471	0.582119	NA	8.11309	1.28866	-0.413985	-0.325782
AC025211.1	-0.242207	1.65004	0.241917	NA	-2.34981	-0.417903	0.516894	0.243778
AC025262.1	-0.646764	-2.53788	-0.173708	NA	0.801308	0.400501	0.0108589	0.0776655
AC025262.4	0.840671	1.30925	0.86156	NA	0.412689	0.659605	0.252032	0.367137
AC025263.1	0.0580781	0.594827	-0.0346122	NA	-0.229124	-0.114064	0.341704	0.0684511
AC025265.1	0.0444698	-0.572883	0.266191	NA	0.249268	0.0120186	-0.391031	0.326761
AC025283.2	-0.328147	-3.08983	-1.95335	NA	-0.194931	-1.29817	0.0857325	0.0566869
AC025284.1	1.64709	-0.377167	-0.710706	NA	1.8134	0.272577	0.187637	-0.0508294
AC025287.4	-0.0802851	1.3893	0.205045	NA	-0.310133	-0.366116	0.623966	0.392786
AC025419.1	0.842161	2.21347	0.0335299	NA	-0.505776	0.191429	1.54464	0.401965
AC025442.2	-0.113564	2.11864	0.291018	NA	-0.624141	0.157604	0.101685	0.159042
AC025449.2	1.95709	0.0257549	-0.441453	NA	0.52786	-0.907418	-1.17882	-0.061604
AC025470.2	-0.826165	-0.50024	0.134744	NA	-0.555223	0.304887	0.154403	0.597062
AC025569.1	-0.0366052	1.1578	0.70348	NA	0.365997	0.402925	0.258758	0.305887
AC025576.3	0.0507037	1.65625	0.583977	NA	-0.064354	-0.736805	0.0211814	0.160335
AC025580.2	0.103204	1.88129	1.20275	NA	-1.03448	-0.0763672	0.130919	0.204571
AC025580.3	0.133483	0.768432	0.293051	NA	0.226453	-0.612997	0.0337099	0.0587745
AC025627.1	-0.176759	0.868626	0.772888	NA	-0.105245	-0.00915002	0.143138	-0.0537789
AC025682.1	-0.455466	0.818003	0.587179	NA	-3.46636	0.594942	1.57832	0.666726
AC025774.1	-0.575594	-2.40352	-0.100771	NA	0.0397174	-1.27449	0.344658	-0.0432507
AC025809.1	-0.559278	0.0992083	-0.0883563	NA	0.00138184	-0.303569	0.414131	-0.179789
AC025810.1	-0.653452	-0.527716	-0.235109	NA	0.335341	-0.662584	-0.414426	-0.199608
AC025871.1	0.088944	1.10658	0.19126	NA	-1.50511	-0.623516	0.358612	0.0362898
AC025887.2	0.624558	0.0507817	-0.164078	NA	-1.02328	0.57598	1.04286	0.655745
AC025917.1	0.04247	1.63206	0.697348	NA	-2.19068	0.175934	0.332589	0.105191
AC026124.1	0.0236188	0.67656	0.275177	NA	-0.65407	-0.140881	0.156076	0.0198071
AC026124.2	-0.163538	0.801826	1.07079	NA	1.26461	0.181263	-0.284342	-1.00823
AC026167.1	-0.663214	-5.43967	-2.31075	NA	-0.51392	0.169766	0.00438891	0.155808
AC026202.2	0.015755	1.20049	0.585623	NA	-2.51613	0.292114	0.45426	0.525976
AC026254.2	-0.344542	-0.665102	-0.00386182	NA	1.57916	-0.256539	0.0262767	0.14565
AC026304.1	0.133146	-1.23563	-0.470783	NA	1.30556	0.600775	-1.09622	-0.536185
AC026333.3	-1.0367	-0.325081	-0.316779	NA	0.585762	-0.0526531	-0.0759032	0.0494334
AC026341.1	-0.0549296	-3.60098	-0.235319	NA	0.230994	0.032088	0.467616	0.64177
AC026347.1	-0.0521169	3.21879	0.878878	NA	-0.576595	-0.360091	0.0143775	0.381308
AC026356.1	0.290533	-0.906633	-0.0358016	NA	0.473686	0.0125381	0.579947	-0.206087
AC026356.2	0.31604	-0.0354814	0.286167	NA	-0.0691083	-0.992171	0.447267	-0.0707169
AC026369.1	-0.166611	0.10929	0.0479329	NA	-0.130645	0.487187	0.406752	1.39028
AC026369.3	0.0572442	1.07908	0.703976	NA	-0.0319018	0.575689	0.111033	0.889902
AC026412.3	-0.0294308	0.846353	0.489078	NA	0.542877	-0.117001	-0.123713	0.538466
AC026470.2	0.141161	1.81254	0.372153	NA	-1.66312	0.0659378	-0.00207073	0.131812
AC026471.1	-0.163978	0.0388917	0.100681	NA	-0.176133	-0.145044	0.162002	-0.142323
AC026471.2	-0.0231085	-1.03406	-1.48501	NA	0.526563	-0.213723	-1.07701	-0.211604
AC026471.4	-0.233702	-1.50493	0.00524855	NA	0.32077	0.736315	0.342524	-0.0984422
AC026471.5	-0.0383491	0.397578	0.237468	NA	0.426809	-0.124134	0.0265079	-1.45043
AC026689.1	-0.146145	0.988148	1.00968	NA	-0.116964	0.0376235	0.12156	1.28431
AC026704.1	0.100576	1.65603	0.770152	NA	-3.53379	-0.246527	0.487696	0.537773
AC026741.1	0.161762	0.792051	0.347572	NA	0.476003	-0.0992308	-0.348579	-0.408307
AC026746.1	0.133924	1.49391	0.330495	NA	-0.947985	-0.0713581	0.420553	0.554154
AC026748.3	0.738203	-0.988708	-0.61862	NA	1.67052	0.174731	0.00336606	0.137408
AC026765.3	-0.654645	0.445961	0.167929	NA	-0.048661	0.432001	0.723722	0.268215
AC026803.3	0.058171	1.04085	0.706243	NA	-1.3598	0.252468	-0.0189451	0.107639
AC026888.1	0.114377	1.31558	0.434942	NA	-0.939491	-0.594784	-0.029287	0.634016
AC026894.1	-0.358369	1.82071	0.299263	NA	-0.515824	-0.224717	0.130979	0.25686
AC026979.2	0.822111	-0.184031	-0.679643	NA	5.46455	0.0502512	-0.870581	-0.0276349
AC026979.4	-0.0129104	-1.67614	-1.24616	NA	-2.44506	0.089146	-0.74413	0.105138
AC026991.2	-0.33298	0.773001	0.256663	NA	-0.87943	0.00307232	0.503862	0.901911
AC027018.1	0.077158	2.18171	0.842317	NA	-2.45542	-0.208979	0.651094	0.226632
AC027020.2	0.859796	0.07505	-0.0306486	NA	-1.17908	-0.669448	-0.091168	0.666959
AC027031.2	0.116473	0.443637	1.11424	NA	0.948737	-0.0999991	-3.84776	-1.02087
AC027088.2	-0.418827	0.0522652	-0.021651	NA	0.552078	-0.089928	0.425107	0.791719
AC027097.2	-0.295761	-0.254752	0.029616	NA	-1.89658	1.21644	0.925034	2.0516
AC027117.2	-0.784898	0.10139	0.35079	NA	-0.219878	-0.251717	0.0283063	-0.0132925
AC027128.1	0.367703	1.00532	0.257873	NA	-0.564657	0.677084	0.0181201	0.18021
AC027130.1	-0.383277	0.942587	0.759145	NA	-0.9352	-0.0135225	0.0149813	0.120403
AC027243.3	-0.0331136	1.63523	1.00345	NA	-0.766068	-0.270647	0.243792	0.0946525
AC027251.1	-0.185245	0.806168	1.56593	NA	0.162632	0.0111334	0.0310649	0.45961
AC027279.1	-1.13678	0.41668	0.259601	NA	-0.286563	-0.882612	-0.0355411	0.18554
AC027288.3	0.106745	1.60189	0.77401	NA	-2.44466	0.0869672	0.231717	0.700451
AC027307.1	-0.757776	0.181883	0.282167	NA	0.743186	0.410809	-0.127901	0.260324
AC027307.3	-0.292385	0.739512	0.313371	NA	1.69529	0.127594	-0.594207	-0.0197562
AC027312.1	-0.00904705	1.98873	0.183193	NA	-1.29149	-0.24219	0.145309	1.79876
AC027601.6	0.0716045	-0.291449	-0.249725	NA	8.33648	-0.775282	-2.43268	0.111437
AC027644.3	1.46351	-0.082904	-0.285309	NA	1.25121	-0.028726	-3.41832	0.222385
AC027682.4	-0.824074	-3.22771	-0.188453	NA	-0.0988836	-0.73114	0.281424	0.283145
AC027682.6	-0.295227	-1.5828	-0.214897	NA	0.964479	0.253519	-0.151994	0.391137
AC027698.1	0.263754	1.66077	0.424851	NA	-2.08718	-0.0979743	0.493946	0.895345
AC027808.2	-0.167274	0.145672	0.0270621	NA	-0.10332	0.24296	0.180726	-0.334509
AC034102.5	0.0424016	0.4263	0.643068	NA	9.29149	0.276698	-0.37822	-0.000475253
AC034111.1	3.29189	0.858267	-0.0814151	NA	0.290675	-0.36787	-0.0572005	-0.113451
AC034111.2	0.514251	1.22182	0.232018	NA	-0.576016	-0.980868	0.513249	0.266945
AC034114.2	0.386655	1.09014	0.702974	NA	-0.78136	-1.1785	-0.0035603	0.871979
AC034139.1	0.864951	2.38563	0.161163	NA	-0.491114	0.502265	0.974179	1.50204
AC034193.1	0.820583	2.54159	0.319184	NA	-0.328557	-0.128076	-0.142823	-0.0116472
AC034195.1	-0.381235	-1.31263	-0.0708971	NA	-0.498718	-0.43806	0.537098	0.0060863
AC034228.1	0.21136	1.428	0.197217	NA	0.016366	0.0268319	0.754112	1.04266
AC034228.3	0.0604612	2.07621	0.617262	NA	-1.08588	0.220245	0.692255	0.141113
AC034236.2	0.279956	0.438549	0.235939	NA	1.53321	-0.0993545	-1.17998	0.404186
AC034268.2	-0.014861	-2.0494	-5.36939	NA	-0.836036	-0.314226	3.02112	0.149685
AC035140.1	-0.644626	-2.06439	-1.16522	NA	0.24629	0.531767	-0.649746	0.347078
AC036103.1	0.315125	1.38632	0.493573	NA	-1.3632	0.72306	0.191765	0.2103
AC036108.1	-0.407387	-1.58773	-0.794464	NA	-0.585492	1.15581	3.26915	1.33772
AC036176.1	0.322633	-0.644427	0.0122169	NA	0.176925	-0.0369902	-0.881305	-0.546895
AC036214.1	0.103473	0.270701	0.156859	NA	-0.135949	-0.0251522	1.23825	0.317491
AC036214.4	-0.45755	0.530035	0.380613	NA	-0.583546	1.29331	0.53787	0.121005
AC037459.2	-0.0299871	-0.0938033	-0.0103587	NA	-0.759967	0.0243936	0.991732	0.585436
AC037487.1	0.450111	1.0398	0.572296	NA	0.45836	-0.549537	0.2134	2.37658
AC040168.1	-1.69215	-0.60369	0.063592	NA	0.0702331	1.21732	3.48848	-0.00570478
AC040169.1	0.0424535	0.342594	-0.0592614	NA	0.0423058	-0.500084	-0.678381	-0.496124
AC040173.1	-0.360146	-0.358299	0.223844	NA	0.753075	0.012571	0.0419345	0.207643
AC040174.1	-1.06705	-0.308516	0.18358	NA	-0.551063	-0.679849	0.0458127	-0.13441
AC040934.1	-0.044574	-0.927584	-0.19764	NA	-0.21351	-0.190882	0.268054	-0.256209
AC040977.1	-0.270858	0.210906	0.448533	NA	-0.53073	1.17533	0.628759	0.0112776
AC044781.1	0.160957	1.57813	1.36209	NA	-1.00142	0.260102	0.422425	1.46628
AC044798.3	0.109481	1.1775	0.9393	NA	-0.665309	-0.523858	1.18154	0.15277
AC044810.2	-0.774097	0.555867	0.267457	NA	-0.750879	-0.106351	-0.0401914	-1.16473
AC044840.1	-0.0600545	1.43333	0.388721	NA	-0.672628	-0.324141	0.130467	0.370748
AC044849.1	0.219959	1.67786	0.745783	NA	1.89019	-0.134198	-0.349293	0.106069
AC046130.1	-0.114609	0.79708	0.419522	NA	-0.25313	0.0767404	-1.16293	-0.152639
AC046134.2	-0.49096	-1.17557	-0.698525	NA	-0.901878	0.25864	5.13259	0.0126863
AC046143.1	0.413588	1.05497	0.639424	NA	0.330884	1.29504	0.167287	1.36556
AC046158.1	0.0798855	1.33661	0.989975	NA	-0.290359	-0.554713	0.185724	0.928627
AC046195.1	0.109105	-0.769141	-1.00212	NA	0.0823541	0.356276	0.759722	1.51091
AC048341.1	0.274239	1.1572	0.46517	NA	-0.219473	-0.451516	0.608762	0.275331
AC048341.2	0.353032	0.197112	0.164029	NA	1.5173	0.138225	-0.104306	-0.0742247
AC048380.1	0.0344992	0.947347	0.389008	NA	-1.09467	-0.210004	0.86793	0.698195
AC048382.5	0.204868	1.52818	0.547338	NA	-0.451263	-0.783576	0.581712	0.275108
AC051619.4	-0.339519	0.288704	0.229005	NA	0.285845	-0.213773	0.290558	0.187636
AC051619.5	0.543209	-0.30758	-1.9552	NA	1.47986	1.80686	0.898048	0.311224
AC051619.6	-0.250625	0.547194	0.999279	NA	1.65964	0.291733	0.245824	0.398704
AC053513.1	0.118306	1.54714	0.655538	NA	-2.39039	0.060576	0.274322	0.610874
AC053527.2	-0.560087	-0.643978	0.29517	NA	-1.61918	-0.308333	2.55805	0.0545805
AC055733.2	0.411216	1.87632	0.284434	NA	-1.55974	0.00411992	0.148104	0.183023
AC055788.1	0.0142467	0.801221	0.761593	NA	1.81777	-0.0777489	-0.326911	0.774138
AC055811.1	0.0678483	2.1927	0.975987	NA	1.00843	-0.608706	-0.0334369	0.5447
AC055854.1	0.485356	0.627414	0.0040636	NA	-0.392267	-0.10644	0.138871	0.0783115
AC055855.1	0.00510796	1.25606	0.25096	NA	-0.0990743	-0.736395	0.248279	0.553878
AC055855.2	-1.41804	-0.516275	0.198481	NA	-0.550681	0.176114	0.0488394	-0.409589
AC058791.1	0.267088	1.57546	1.1836	NA	-0.403032	0.233194	-0.168089	0.0855884
AC060765.1	-1.13238	-0.283527	0.119245	NA	0.611795	-0.12925	0.290531	0.508748
AC060765.2	-0.364518	1.07551	0.669442	NA	-0.369047	0.477561	0.352793	0.362171
AC060780.1	0.147186	0.0658428	0.523304	NA	1.63197	0.356102	-1.35476	0.0603568
AC060809.1	-1.44671	-0.472762	-0.927669	NA	-0.776168	0.465254	0.646781	0.249088
AC060834.2	-3.30668	-0.31099	-0.334122	NA	-1.08902	0.446717	0.332386	2.3884
AC061708.1	0.251106	-0.387174	-0.607829	NA	-0.118639	-0.315006	0.392179	0.251476
AC061958.1	-0.0708223	1.45993	1.14834	NA	-0.908561	0.355213	0.311417	0.219677
AC061961.1	-0.129384	-0.669891	-0.406193	NA	0.66531	1.8093	1.16694	0.612823
AC061975.8	-0.406641	1.47901	1.7083	NA	-4.02189	-0.967139	0.277037	0.371157
AC062022.2	0.192216	-2.56938	-0.590214	NA	-0.0926763	-0.0262681	-0.0550019	-0.0888965
AC063944.1	1.12505	2.50965	0.569072	NA	-0.597315	-0.229981	-0.724881	-0.429798
AC063979.2	-1.07039	-6.81329	-0.716153	NA	-0.284579	-0.219024	0.053625	1.01454
AC064805.2	0.0637855	-0.931168	-0.505215	NA	1.62156	-0.657639	0.00277742	0.156197
AC064807.1	-0.188224	0.792733	0.795036	NA	2.98857	-0.271898	-0.0509929	-0.301593
AC064807.2	-0.140798	0.561269	0.242446	NA	-0.134538	-0.321116	0.743489	-0.00976171
AC064836.3	-0.0311955	1.54078	0.775801	NA	1.05598	-0.511065	-0.508986	-0.55868
AC064836.4	0.0982881	1.33683	0.733553	NA	-0.635697	-0.378938	0.240062	0.0657091
AC064852.1	-0.152158	1.48587	0.41707	NA	1.26424	0.186367	0.0728913	0.02654
AC064871.2	0.605373	1.5556	0.385727	NA	-0.378129	1.31361	-0.0594409	0.135393
AC064874.1	-0.137689	0.711557	0.743397	NA	-0.381652	-0.561808	-0.320035	0.627622
AC064875.1	-0.111646	0.211352	-0.242947	NA	-0.336033	-2.73349	-0.0314271	-0.609467
AC066585.1	-0.0842357	0.0326156	-0.0154508	NA	-0.594647	0.823406	0.719364	0.225558
AC066612.1	0.0157384	-0.686083	0.0435237	NA	0.324413	-0.199234	-0.0296411	-0.708009
AC066613.2	0.0686135	0.986683	0.536093	NA	-0.9131	-0.464888	0.24142	0.184182
AC067750.1	0.542549	-1.47142	-0.0853777	NA	0.227489	-0.0128814	-0.136816	0.041289
AC067751.1	-0.182985	0.34327	0.512701	NA	-1.00782	-0.0470161	1.34589	0.334158
AC067773.1	0.0209955	-0.117886	-0.183552	NA	0.999795	-0.138903	-2.23799	-0.00664181
AC067817.2	-0.0507772	1.22402	0.77368	NA	0.99129	-0.387314	0.0415305	0.347502
AC067852.2	0.551226	0.00922994	-0.0151904	NA	1.539	-0.155222	-0.812542	-0.0866559
AC067852.3	-0.392206	0.226222	0.364439	NA	1.21607	0.452979	1.62099	0.770035
AC067852.5	0.501871	0.280416	0.211013	NA	0.419396	0.0710298	-0.445774	0.485339
AC067945.4	0.0752198	1.88489	0.373099	NA	-0.0845326	0.329455	0.317167	0.536544
AC068025.2	-0.134577	0.105108	0.404828	NA	-0.233436	0.0457636	1.21598	0.606221
AC068051.1	-0.012867	2.60035	1.18923	NA	-0.929974	0.371256	0.322633	0.252183
AC068189.1	0.0783036	0.0618255	-0.226327	NA	-0.114916	-0.220142	0.429718	-0.0852451
AC068205.1	0.0117573	0.58314	1.26922	NA	0.963595	0.398087	-0.324631	-0.234053
AC068205.2	-0.422016	-0.204765	0.50894	NA	0.537329	-0.73954	-2.00548	-1.02728
AC068228.3	-0.00598993	-0.221373	-0.169954	NA	1.29397	1.17377	0.617576	0.164463
AC068234.2	-0.28153	0.15861	0.0194753	NA	0.40808	0.346386	-0.20432	-0.372418
AC068279.2	0.17917	0.600754	1.29608	NA	0.959891	-0.247209	-0.299386	0.170759
AC068282.1	0.0722827	1.90545	0.836584	NA	-4.85036	0.349975	0.456083	0.684919
AC068286.2	-0.861784	0.0250453	-0.10251	NA	-2.36617	0.946431	2.91208	0.392194
AC068308.1	0.204778	1.19502	0.268093	NA	-0.499073	-0.211259	-0.00885488	0.754488
AC068338.3	0.524213	0.0952193	-0.113823	NA	0.726708	0.11436	-1.43761	-0.60376
AC068389.1	-0.0234646	-0.801365	-0.428067	NA	0.241002	-0.472075	-0.404694	0.0526449
AC068389.3	-0.0530835	1.53477	0.627543	NA	-0.423831	-0.208526	0.18501	0.0514028
AC068446.2	0.163959	-0.0305963	0.669621	NA	0.525441	-0.260665	-0.0818474	-0.286276
AC068473.1	0.591405	-0.603197	0.0251939	NA	-6.02175e-05	-0.179597	0.194692	0.176624
AC068473.5	0.347905	-0.987634	-0.432006	NA	1.36102	0.0403914	-1.11728	-0.0833379
AC068481.1	0.114745	2.40721	0.51871	NA	-1.09459	0.068151	0.720407	0.247451
AC068533.3	0.150034	1.88315	1.15318	NA	-1.12525	0.185858	0.403678	0.923985
AC068587.4	-0.957357	0.531351	0.800891	NA	-0.144772	2.07356	1.14535	0.423194
AC068631.1	-0.363689	-1.20381	-0.277682	NA	1.18108	-1.44213	-0.0513661	-0.72311
AC068633.1	-1.14939	-0.52585	-0.0593012	NA	-0.130219	-0.410071	0.787001	-0.149935
AC068722.1	-0.131282	1.70352	0.890697	NA	-0.998378	-0.690692	0.966295	0.522865
AC068724.3	0.00656386	2.06921	0.634724	NA	-1.1963	-0.0643599	1.20659	1.41132
AC068725.1	-0.0139149	1.64372	0.474408	NA	-1.23147	0.184634	0.308051	0.386896
AC068790.9	1.02208	-0.401213	-0.117109	NA	0.0227779	-0.810575	0.743241	0.388971
AC068875.1	-0.249439	-1.15521	-0.635115	NA	-0.137133	-1.08433	-0.0702416	-0.0291766
AC068888.1	0.0769564	2.42177	0.708251	NA	-1.31838	0.461933	1.49232	0.89084
AC068931.1	0.111279	1.61457	0.62795	NA	-2.70478	0.0839522	0.589183	0.361909
AC068987.2	0.0346457	1.38545	0.129945	NA	-0.212974	0.0371252	0.520604	0.316077
AC069029.1	-0.185649	0.527466	0.336286	NA	-0.36543	-0.404853	0.2258	0.413492
AC069133.1	0.10559	0.765645	0.240424	NA	-0.791927	0.0152964	1.64641	0.440562
AC069155.1	0.0855145	1.8887	0.206678	NA	-0.383667	-0.160165	-0.0298469	-0.0388262
AC069185.1	1.13755	-0.00738668	0.415706	NA	2.9243	0.169943	-0.345444	0.840978
AC069209.2	0.30001	-0.674892	-0.461195	NA	-0.0723863	-0.503159	0.325611	0.221419
AC069224.1	0.764686	-0.377985	0.0893653	NA	2.66193	-0.226985	-1.71701	0.199643
AC069228.1	0.0341823	1.32325	0.761893	NA	-2.4133	-0.0805993	0.559456	0.627105
AC069234.1	-0.376839	0.985138	0.334694	NA	0.290481	0.0650988	0.0388398	-0.416203
AC069272.1	0.405231	1.07676	0.217026	NA	-0.579321	-0.936433	0.189008	0.402956
AC069277.1	-2.70091	-0.600679	0.376778	NA	-1.0863	0.475671	0.303975	-0.0271209
AC069437.1	0.0244615	1.6685	0.657843	NA	-0.77116	0.188108	0.197229	0.814864
AC069544.1	0.195318	-0.332432	-0.00116573	NA	0.28291	-0.243714	-0.227838	-0.60868
AC069547.2	0.585952	1.915	0.799927	NA	-0.676529	0.478448	0.178047	0.588891
AC069549.1	-0.276184	1.14977	0.992796	NA	-0.571767	-0.00420427	0.441108	1.24238
AC072026.2	-0.356112	-1.27485	-0.230325	NA	-1.02484	0.210482	0.707585	0.166817
AC072028.1	-0.16223	0.900424	0.40213	NA	-0.0918978	-0.0561663	0.635157	0.261029
AC073046.3	-0.0712351	1.41855	0.452727	NA	-1.30804	0.404548	0.158882	1.29376
AC073050.1	-0.285591	0.285194	0.298924	NA	-0.541793	-0.36238	0.363551	0.146329
AC073052.2	0.408795	1.66009	1.06044	NA	1.43671	0.439419	-0.319838	0.45558
AC073071.1	-1.50342	-1.21313	0.103937	NA	-0.118571	-0.728857	0.786877	0.345832
AC073111.4	0.557116	-1.05173	-0.349424	NA	0.443613	-0.435291	-0.389653	-0.216847
AC073114.1	-0.820652	-1.32644	0.0418468	NA	0.112218	-1.25775	0.790869	0.40198
AC073167.1	0.0948389	2.09998	0.73369	NA	-2.55731	0.219797	1.61206	0.876395
AC073195.1	-0.181686	0.514721	0.748158	NA	0.393901	-0.0145021	-0.671867	-0.113985
AC073210.3	0.177707	0.822043	0.187544	NA	0.527546	-0.369589	-0.187777	-0.206195
AC073225.1	-0.370918	-0.0891025	0.1815	NA	-0.857748	0.0578542	0.275844	0.983456
AC073263.1	0.297526	0.562452	0.150953	NA	-0.167918	-0.493636	-0.108527	0.0738734
AC073270.2	-0.0440559	0.216926	-0.0314451	NA	0.113828	-0.223636	1.32062	0.850265
AC073320.1	-0.161226	1.50783	1.15106	NA	-2.2869	1.03939	2.60087	0.635856
AC073332.1	-0.0577663	-1.12756	-0.280617	NA	-0.249271	0.44039	0.293054	0.524513
AC073333.1	0.067484	1.36343	0.953241	NA	-0.3751	0.728443	0.396874	0.432318
AC073336.1	-0.0852023	1.25564	0.660116	NA	0.764581	0.158009	0.17817	0.700733
AC073342.1	0.346719	1.18459	0.511672	NA	-0.7638	-1.09309	0.125312	0.0350714
AC073343.2	1.24905	1.23438	-0.396698	NA	-0.113749	0.457873	1.06226	0.705403
AC073346.1	0.119165	1.75573	0.576911	NA	2.10834	0.108558	-0.29473	0.775882
AC073349.4	0.0973945	1.43179	0.823113	NA	-2.24788	0.314173	-0.219477	-0.092548
AC073365.1	-0.00991247	0.381064	0.281625	NA	-0.599414	-1.03497	-0.0813688	-0.227728
AC073389.1	-0.154115	-0.298386	-0.0546659	NA	-0.100365	0.0158447	-0.0121956	-0.0373863
AC073389.2	-0.976583	1.83749	0.855236	NA	-0.479765	-0.882086	1.15623	0.119615
AC073475.1	-0.153613	-2.41985	0.136428	NA	0.0771399	0.711167	2.35682	0.18644
AC073525.1	0.15848	1.60812	0.498236	NA	-0.0281122	-0.0203458	0.228599	0.515612
AC073529.1	-0.141073	-2.92977	-2.28176	NA	-0.946205	-0.216476	0.313606	0.5531
AC073530.1	0.275685	1.21382	0.421642	NA	-0.542092	0.0477355	0.277529	0.424447
AC073548.2	0.172158	1.40808	0.238541	NA	-0.404666	-0.304465	0.322581	0.365909
AC073569.2	-0.106695	1.78529	0.415551	NA	3.68368	1.04839	0.223722	0.221228
AC073571.1	0.237173	2.4709	0.426416	NA	-1.25984	0.351884	0.229863	0.745272
AC073592.1	0.0995647	0.509999	0.28591	NA	0.630058	-0.238863	-0.357449	0.712062
AC073593.2	0.0242114	0.732332	0.231638	NA	-0.0153325	-0.453324	0.0298559	0.611021
AC073648.7	0.212028	0.805107	1.23661	NA	-0.971127	-2.04034	0.0310691	0.106005
AC073840.1	-0.0162151	2.24535	1.00544	NA	0.680532	0.0507568	0.501021	0.428347
AC073842.2	1.1827	1.26718	0.321586	NA	0.771818	-0.0838924	0.166765	-0.0294919
AC073878.1	-0.213234	-2.02719	-0.175357	NA	-0.363307	-0.539145	0.247932	-0.0372556
AC073896.2	0.246089	3.36183	0.193529	NA	-1.42785	0.54922	0.829023	0.752692
AC073896.3	0.0100506	2.4686	1.12064	NA	-0.525949	0.0171744	0.0440866	0.0656312
AC073957.1	-0.770699	-1.16058	-0.162611	NA	0.189506	0.291446	0.754698	0.98514
AC073957.3	-0.0119519	0.227864	0.384775	NA	2.31342	-0.153514	0.0722402	0.0634046
AC073968.2	-0.728943	0.262469	0.52466	NA	0.596584	-0.175071	0.827906	-0.105496
AC074024.1	-0.0501428	0.27274	0.159443	NA	-0.718071	-0.207508	0.00332768	-0.119585
AC074032.1	0.111709	4.94222	0.860511	NA	-3.26435	0.0833115	1.46075	0.0185164
AC074044.1	1.66745	0.174344	-0.28016	NA	2.50688	0.660383	-0.741905	-0.0645654
AC074096.1	0.29991	0.870144	0.55491	NA	-0.183095	0.417112	0.0871649	0.263759
AC074099.1	-0.0483892	0.538464	0.277022	NA	0.183521	0.0876762	0.338493	0.117054
AC074117.1	-0.108863	0.833134	0.604843	NA	-0.127479	0.940287	0.299681	0.780155
AC074124.1	0.171962	2.11155	0.90503	NA	0.14584	1.70203	1.25705	0.557046
AC074286.1	-0.277917	-1.32596	-0.349337	NA	-0.831656	0.00509628	1.08081	-0.237929
AC074351.1	-0.0105227	-5.4128	-0.514231	NA	-0.0798668	0.744479	0.552398	-0.0830634
AC076966.2	0.0811031	-1.05035	-0.253298	NA	-0.426381	-0.117567	0.111475	0.0820766
AC076968.2	-0.015243	-0.14191	0.0582034	NA	0.261661	-0.733864	0.396769	-0.105457
AC077690.1	0.0291978	2.29517	1.23728	NA	-2.03171	0.171685	0.568641	0.806573
AC078785.1	-0.631417	0.0457228	0.469168	NA	-1.66281	1.16386	2.47315	1.27579
AC078842.2	0.0670887	1.31791	0.848956	NA	-0.437612	-0.570879	0.235379	0.605726
AC078846.1	-0.289638	-2.9487	-0.451676	NA	0.230494	-0.670728	-0.0727844	-0.098256
AC078881.1	-1.40546	-0.558957	0.102591	NA	-1.00617	0.00802997	1.03538	0.435786
AC078883.1	-0.208983	-0.783444	0.296549	NA	0.62268	-0.00183037	0.241652	-0.0351093
AC078909.1	0.384899	0.685454	0.10295	NA	-0.0297895	1.03564	1.46235	0.142018
AC078909.2	-0.437606	-0.869324	-0.192963	NA	0.488186	-0.155783	-0.173427	-0.111648
AC078923.1	-0.252322	0.778577	1.32188	NA	0.809803	0.72005	0.774458	0.308539
AC079030.1	-0.130719	1.9266	0.987533	NA	-0.806979	0.0115739	-0.0513212	0.864984
AC079052.1	0.00579481	1.02263	0.424064	NA	0.332115	0.477569	-0.360186	0.071973
AC079089.1	0.134637	-0.887085	-0.987925	NA	1.54563	0.42604	0.188634	-0.140547
AC079117.1	-0.0528731	1.42707	1.10085	NA	-0.108398	0.0727156	0.940303	1.09118
AC079140.6	0.0600831	-1.95375	-0.391858	NA	1.41197	-0.734618	0.106237	-0.321127
AC079142.1	-0.490952	-3.2554	-0.778648	NA	-0.273755	-2.12842	-0.10462	-0.0114274
AC079148.1	-0.015365	0.6347	0.692518	NA	-0.00488139	0.729973	0.451384	1.41664
AC079148.2	-0.0138835	0.443969	0.671216	NA	1.58789	1.25829	0.61743	0.660168
AC079148.3	-0.666091	-2.49239	0.103569	NA	9.03793	1.4226	-0.328491	0.50577
AC079154.1	0.76582	-0.234085	-0.144097	NA	-0.501429	0.669391	0.424293	-0.498631
AC079174.2	1.49122	-0.277774	-0.220321	NA	-0.0252625	0.186065	0.16704	0.463567
AC079193.2	0.251048	2.54956	0.282684	NA	0.0484463	-0.369166	0.0908535	-0.0552714
AC079209.2	-0.00101149	0.897302	0.480799	NA	-0.664682	-0.249014	0.278951	0.173686
AC079226.2	0.0636945	2.1194	1.07376	NA	-2.2071	0.0647221	0.540049	0.553222
AC079296.1	-0.166915	-0.894184	-0.28688	NA	-0.0359761	0.0450911	-0.0132443	0.309955
AC079298.3	-0.344375	0.0574316	-0.268502	NA	-0.347078	-0.577708	0.902455	0.0327484
AC079305.3	-0.665157	-3.72607	-0.232388	NA	0.399048	0.171653	0.0199366	-0.130681
AC079313.2	-0.0669226	-1.38436	-1.10418	NA	1.05302	-0.471449	1.53959	0.276384
AC079336.4	-0.189481	0.911452	0.487796	NA	-1.51542	0.104389	-0.0930007	-0.0863112
AC079362.1	-0.359865	-0.0435518	-0.00275582	NA	-0.593848	0.285283	0.193293	-2.71358
AC079382.2	0.234964	0.582408	1.21472	NA	-0.350374	-1.02921	-0.307136	-0.366883
AC079385.1	-0.866289	-0.008996	0.287241	NA	-1.08682	0.370002	0.770053	0.288899
AC079414.3	-0.420004	0.250026	0.708636	NA	-0.740876	-0.464772	-0.622164	-0.184967
AC079447.1	-0.827436	-0.949248	0.227878	NA	-0.41904	0.731048	1.99499	0.659298
AC079465.1	-0.259537	1.06759	0.592562	NA	-0.338717	0.174275	0.51717	0.199238
AC079584.1	-0.158457	0.664112	0.28105	NA	0.372242	-0.190329	-0.165746	0.00360944
AC079760.1	0.0900327	-0.999933	-1.72197	NA	-0.610174	-0.65556	1.73985	-0.111204
AC079760.2	0.487515	1.99659	-0.0285877	NA	-3.13958	0.423834	2.10708	0.0424711
AC079779.2	0.0667732	2.92367	0.515946	NA	-0.685447	0.0610569	-0.132403	-3.29924
AC079781.5	-0.531319	1.99387	1.00374	NA	-4.21803	0.378402	1.69933	0.778228
AC079790.1	-0.220458	1.45781	0.152216	NA	-0.599543	0.102911	-0.138856	0.148586
AC079793.1	-0.511461	0.476361	1.18398	NA	0.174298	-0.425306	0.26352	-0.274662
AC079807.1	-0.173213	0.388294	0.3753	NA	-0.27627	-0.162715	0.0153571	0.161377
AC079822.1	0.00775174	1.79563	1.08275	NA	0.00628611	0.629454	0.839566	0.599263
AC079841.2	0.0172553	2.2838	0.950602	NA	-1.17619	-1.68692	0.230536	0.619331
AC079848.1	0.165411	2.23148	0.194571	NA	0.121343	-0.744469	0.0104059	-0.0920426
AC079848.2	-0.32915	-0.104996	0.34829	NA	0.360975	-0.163951	-0.0702143	-0.0831371
AC079915.1	-1.7655	-0.608581	0.0921989	NA	-1.37005	-0.00599847	0.109724	-0.576295
AC079921.1	0.0939271	2.00295	0.799465	NA	-0.562659	0.352931	1.47072	0.876492
AC079922.2	-0.0438768	0.77495	0.251898	NA	-0.0287268	-0.643299	-0.868878	-0.215355
AC079949.1	1.24802	0.027557	-1.01208	NA	0.446077	-0.251449	0.112352	0.433569
AC079949.2	0.732833	-0.445399	-0.00568782	NA	5.61638	-0.307452	-1.31036	0.343519
AC079949.3	0.883681	-0.0673129	-0.479095	NA	-0.0415474	-1.37926	0.308395	0.32908
AC079949.6	0.343284	1.27431	0.444865	NA	0.0722428	0.189602	0.830302	0.548464
AC079950.1	-1.03859	-0.562917	-0.0596169	NA	0.352844	-0.790891	0.274702	-0.125095
AC080013.1	0.308728	1.02042	0.322259	NA	-0.0137317	-0.264008	-0.129986	-0.0326799
AC080079.2	-0.474852	1.30876	0.810683	NA	-0.56093	-0.748599	-0.162943	0.178577
AC080162.1	-0.32257	0.81318	0.723483	NA	-0.110785	0.0522003	0.81294	0.420844
AC083798.2	0.298755	0.595611	0.21267	NA	-1.01789	0.616358	0.873476	1.07911
AC083843.3	0.186806	-0.633804	0.0581622	NA	-0.285427	-0.563225	0.125211	-0.01222
AC083855.2	0.340512	1.38809	0.455196	NA	-0.561498	1.11474	0.519171	0.3011
AC083862.3	0.487025	0.980284	0.0956557	NA	0.290693	-1.63616	-1.97202	0.37113
AC083870.1	0.404043	2.37081	-0.0383702	NA	-0.558591	0.654365	1.19581	0.46578
AC083906.3	-0.597609	0.508099	0.104432	NA	6.0807	0.333114	-0.148258	1.3378
AC084024.4	2.20999	0.390943	0.175422	NA	0.482634	-0.0610166	0.175265	-0.126824
AC084036.1	-0.322509	0.556927	0.523236	NA	0.0757214	1.00653	-0.106966	0.169498
AC084064.1	-0.0176943	0.912123	1.96698	NA	-0.407549	0.673242	1.89992	1.24087
AC084125.2	-1.12133	-0.383279	-0.294675	NA	-0.820672	0.0849389	1.93348	0.120472
AC084198.2	0.0262068	-3.21484	-0.673552	NA	0.151046	-0.363722	-0.0460479	-0.552828
AC084357.2	0.459079	1.372	0.0260709	NA	0.401311	0.666034	0.0150486	0.0586108
AC084361.1	0.0695492	1.73478	0.712316	NA	-2.0914	0.0660673	1.1496	0.873
AC084724.1	0.103036	1.15806	0.677424	NA	-0.781765	-0.911368	-0.102155	0.341537
AC084740.1	-0.0580647	-0.752187	-1.07098	NA	-3.05452	-1.64349	-0.349221	0.471605
AC084759.2	0.130336	0.014188	-0.0372234	NA	-0.923655	-0.732065	0.0490546	-0.0631271
AC084816.1	-0.282042	0.555818	0.298575	NA	-0.200382	-0.877547	0.616655	0.254717
AC084864.2	-0.63953	0.581738	-0.205249	NA	-0.439461	-0.240009	-0.18536	-4.64411
AC084866.2	0.0514523	0.717291	0.0240683	NA	-0.507571	0.237278	-0.391313	-1.59634
AC084871.1	0.649127	1.46568	0.724583	NA	-0.433154	0.500615	0.042706	0.204369
AC087071.2	0.388525	1.6055	0.0900129	NA	-1.19607	-0.638471	0.296706	0.291011
AC087164.1	0.628317	1.43081	0.927911	NA	-0.73014	1.06544	1.7434	-0.626672
AC087190.1	0.242968	1.72317	0.518281	NA	-0.719206	-0.0196452	-0.0580266	0.100919
AC087239.1	1.20734	-0.896205	-0.534246	NA	2.80162	-0.0713826	-1.11052	-0.25755
AC087276.2	0.114016	0.327155	-0.00692813	NA	-1.43468	1.23283	0.159558	0.409554
AC087280.2	-1.98023	-2.66459	-0.329313	NA	-1.44466	1.28173	3.13788	-0.250785
AC087286.2	0.10308	1.82884	1.54834	NA	-1.27827	0.437849	0.759245	1.04339
AC087294.1	-0.606618	0.100339	0.109909	NA	-0.0726744	-1.10464	0.0857654	-0.0746588
AC087341.1	0.190653	-0.484679	-0.440045	NA	-0.182947	0.111498	0.128545	0.0475682
AC087362.1	0.625429	1.24953	0.813905	NA	-0.0955582	0.514797	0.36936	-0.298698
AC087457.1	-0.0136453	-0.306435	-0.132122	NA	0.254166	-0.0122133	-0.127091	0.351523
AC087500.1	-0.890429	-1.03847	-0.0421769	NA	-1.24954	0.062944	1.60904	0.094107
AC087501.1	-0.110248	2.02786	0.999594	NA	-2.90244	-0.182388	1.034	0.25939
AC087521.2	0.142983	1.83119	0.903017	NA	-0.0505193	-0.239452	-0.570495	0.0457475
AC087521.3	-0.376519	0.776416	0.520656	NA	-0.151412	-0.180343	0.706759	-0.175104
AC087565.2	-0.0304266	1.50963	0.65236	NA	-0.0534879	-0.133407	0.435534	0.539392
AC087639.2	-0.996092	0.154077	0.0472994	NA	0.17571	0.311228	2.03582	0.437182
AC087741.1	-0.373022	-1.73894	0.202884	NA	-0.324069	0.146955	0.623813	-0.0247598
AC087854.1	-0.10148	1.71895	0.420179	NA	-1.03468	0.363779	0.584472	0.308617
AC087855.1	-0.543047	1.04753	0.622756	NA	-0.00429351	0.85346	0.282184	0.864224
AC087855.2	-0.874598	-0.535996	-0.157093	NA	-0.0948349	-0.174072	0.265401	-0.982877
AC087857.1	0.0430367	-2.0618	-0.470995	NA	-0.9623	0.080334	0.0482752	0.0093269
AC089983.1	-0.275606	0.420425	0.124618	NA	-1.28064	0.0748552	1.19324	0.713961
AC089985.1	0.00246442	2.45821	1.40682	NA	-0.370679	-0.208251	0.508496	0.317627
AC089999.1	-0.0871811	1.38083	0.968214	NA	0.0718914	0.347279	0.448759	-0.0222175
AC090114.2	0.570663	0.0169454	-0.0596414	NA	0.304217	-0.183353	-0.0550584	-0.054053
AC090115.1	-0.189358	-2.57765	-0.296425	NA	0.712294	-0.317635	1.69966	0.0135658
AC090125.1	0.286881	-0.352158	-0.162529	NA	1.1854	0.107325	-0.0371969	0.35134
AC090138.1	0.0857343	1.20039	0.708316	NA	-0.986083	0.210652	-0.0705063	0.0838466
AC090152.1	0.791646	0.101879	-0.118414	NA	1.44886	0.361622	-1.73156	0.275038
AC090197.1	-0.35782	0.00910628	-0.267826	NA	0.114453	-0.199761	0.216575	-0.407351
AC090198.1	0.340867	1.74132	0.489293	NA	-0.393467	-0.449025	-0.275849	-0.247273
AC090204.1	1.22743	0.114614	0.274809	NA	-0.394355	0.0762752	0.790515	0.017898
AC090206.1	-0.422821	0.524098	0.0554935	NA	-1.6964	0.0767261	0.522963	0.153517
AC090236.2	-0.126227	0.302727	0.906851	NA	-0.404699	-0.285125	0.251152	-0.0871982
AC090241.2	0.76233	3.15369	0.256099	NA	1.83543	0.274461	0.371274	0.451013
AC090282.1	0.291933	-0.102861	-0.139298	NA	0.642844	0.793404	1.9599	-0.114512
AC090360.1	-0.410382	-0.764669	-0.299351	NA	-0.24312	-0.0386347	0.1601	0.266208
AC090403.1	-0.043753	1.27868	0.177738	NA	-0.19677	-0.478458	0.0147708	-0.402737
AC090517.2	-0.133877	0.864354	0.912429	NA	0.278382	-0.323941	-0.12727	-0.0465128
AC090517.5	-0.957674	-1.53306	-0.0516407	NA	-0.619798	0.406247	1.14499	-0.224266
AC090518.1	-0.311386	-1.67811	-0.20273	NA	-0.368721	-1.48407	-0.342442	-0.105022
AC090531.1	-0.115786	1.67659	0.803074	NA	-1.05356	0.428553	0.353741	0.589858
AC090559.1	-0.403155	-0.206303	0.0439567	NA	0.0119407	1.55127	1.08608	1.52392
AC090578.1	-0.50277	-0.746195	-0.29527	NA	-0.956959	0.0796666	1.10694	-0.198395
AC090579.1	0.038564	1.97307	1.30501	NA	-3.83975	0.730537	0.654701	0.464796
AC090589.2	-0.172686	1.01384	0.321016	NA	-2.32249	0.200716	0.609497	0.743855
AC090617.4	0.160882	1.38632	0.250516	NA	-1.72728	0.506028	0.724466	0.966518
AC090617.5	0.629397	0.917575	0.309724	NA	-0.245702	0.145311	0.254118	0.320296
AC090618.1	0.130384	1.96389	0.156047	NA	-0.144653	-0.699782	0.403804	0.0228848
AC090621.1	-0.350105	0.290803	1.27721	NA	0.0818727	-0.194647	-0.770588	0.061605
AC090630.1	0.0873828	1.64853	0.397565	NA	-1.54266	0.248322	0.105418	0.381038
AC090644.1	-0.0667203	1.23718	0.731387	NA	-0.822802	0.0385823	0.482319	0.617877
AC090709.1	0.0295992	1.60825	0.84791	NA	-3.90945	0.232726	0.205504	0.46918
AC090772.1	-0.0340848	2.81167	0.873124	NA	-1.61646	-0.655592	0.667218	0.295168
AC090772.2	0.0524557	1.92962	0.786653	NA	-1.16321	-0.63427	0.353577	0.3195
AC090809.1	0.0768053	0.592727	0.00338398	NA	-0.522978	1.39933	1.47034	-0.258663
AC090825.1	-5.18752	-1.21658	-0.107624	NA	-1.12735	-0.775525	-0.49018	-0.389008
AC090907.2	-0.365667	-0.767652	-0.0390153	NA	0.0295779	-0.520415	0.118074	-0.118401
AC090912.1	-0.427515	-0.397186	0.118201	NA	0.731084	0.768705	0.202055	-0.422455
AC090945.1	-1.17295	0.243709	4.2198	NA	0.298783	0.42232	0.0104486	-0.00981
AC090946.1	-0.537369	-0.15277	0.617702	NA	-0.000474244	0.537252	1.03589	0.670531
AC090971.2	0.00706324	1.55639	0.714036	NA	-2.32623	0.946037	1.29825	0.136455
AC090993.1	-1.22611	0.259548	0.106576	NA	-0.965125	-0.129566	0.259004	-0.159544
AC091045.1	1.04602	2.1485	0.918288	NA	-3.44438	0.0537591	0.948117	0.99094
AC091057.2	-0.694936	0.114308	1.52845	NA	-0.0733595	-0.629545	0.102182	-0.0897805
AC091078.1	-0.328577	1.15003	1.70002	NA	-0.3116	0.660332	3.85948	0.843477
AC091100.1	0.0823314	1.09741	0.625493	NA	-0.673013	0.438069	0.390561	0.926945
AC091132.2	0.890555	1.21881	2.25864	NA	-0.92984	-0.614687	0.476933	0.467346
AC091132.4	-0.341098	0.573601	0.117077	NA	-0.339285	-0.252377	0.215399	0.701085
AC091133.1	-0.041965	1.97922	0.872913	NA	-1.17266	-0.118158	0.371474	0.24797
AC091138.1	-0.312265	-0.139716	-0.326898	NA	0.0715304	-0.522947	-0.293755	0.427115
AC091151.5	-0.518279	-2.8019	-0.646154	NA	0.431225	-0.139684	0.779771	-0.150166
AC091153.2	-0.00151403	1.28454	0.350985	NA	-1.53935	0.800612	1.25032	0.851373
AC091178.2	-0.39342	0.569042	0.131361	NA	-1.01058	-0.184008	1.26105	1.10872
AC091212.1	-0.678668	0.535307	0.429701	NA	0.160577	-0.114713	0.837705	0.180084
AC091271.1	0.255422	-1.02339	-0.059272	NA	3.56198	0.233609	-0.793183	-0.218834
AC091534.1	-0.0529511	1.18544	0.982552	NA	0.26403	0.0172944	0.493371	0.280648
AC091563.1	-1.44712	-2.92091	-0.0796557	NA	1.27951	0.0823044	-0.480869	0.374404
AC091564.5	-1.40747	-0.062731	0.274511	NA	1.02941	0.0746856	0.211609	-1.2499
AC091576.1	-0.726515	0.060875	0.596118	NA	0.395004	-0.121779	-0.116556	0.165908
AC091607.2	0.466017	3.01329	1.22118	NA	-0.494365	0.520517	-0.231226	0.301114
AC091646.1	-0.0509609	0.696591	0.516216	NA	-2.89631	1.11257	0.795603	0.366697
AC091729.3	0.483593	1.02388	0.379224	NA	1.59646	0.418824	-0.985948	0.213469
AC091820.2	-0.00449133	0.978415	1.28071	NA	-0.253646	1.36883	0.716845	0.852787
AC091826.2	-0.652173	0.188184	0.00038426	NA	-0.296266	-0.318713	1.9698	0.261529
AC091885.2	0.170782	1.42776	0.811134	NA	-2.35104	0.068845	0.56426	0.80336
AC091887.1	0.124899	2.03693	1.11006	NA	-3.50932	0.0128651	0.0695276	0.236381
AC091912.3	0.0760178	-3.57178	-0.469534	NA	-0.887645	-0.509487	0.995224	1.0292
AC091938.1	0.215748	1.52651	0.750966	NA	-1.69504	-0.0254519	0.749569	0.821943
AC091946.1	0.74673	1.24148	-0.142067	NA	-0.301125	-0.952808	0.145535	1.10722
AC091973.1	-0.39356	0.19462	1.04094	NA	0.0803482	-0.0291928	0.0638098	0.348689
AC091978.1	-0.516717	-3.07135	0.0127504	NA	2.0841	-0.221948	0.299222	0.736479
AC092040.1	0.985583	1.03022	0.622294	NA	0.8033	-0.191537	-0.814107	0.384995
AC092058.1	0.231617	-0.973333	0.0181176	NA	0.73702	-0.222123	-0.66705	-0.474399
AC092068.2	-1.2066	-1.10016	0.000498555	NA	1.45744	-0.0909884	0.168579	0.731155
AC092100.1	-1.55612	0.0353966	0.00226392	NA	-0.375898	0.0290184	0.00561927	-0.189061
AC092111.1	-0.0162106	-0.945562	-0.408736	NA	-0.0776434	0.0101729	1.34339	0.336468
AC092114.1	-0.662801	0.173895	-0.538777	NA	-1.83429	-0.527321	-0.0957586	0.289968
AC092115.3	0.156054	0.674444	0.262203	NA	-0.29692	1.10754	0.377283	0.244142
AC092119.2	0.35662	0.189627	0.48726	NA	0.58546	-0.0340973	-0.936316	-0.856435
AC092120.3	-0.115385	1.12295	1.1036	NA	-0.769548	0.009986	0.461612	1.68301
AC092123.1	0.0606046	1.56381	1.16193	NA	-0.360549	-0.190101	0.624742	0.249732
AC092139.1	0.0336752	0.425838	0.853545	NA	-0.189804	-1.07451	-0.474182	-0.614112
AC092140.1	0.282383	2.62143	0.797321	NA	-1.14938	-0.0448623	0.467857	0.415868
AC092142.1	-0.0113184	5.80788	4.00582	NA	-0.679025	-0.479954	0.317047	0.0863575
AC092159.2	0.859156	0.549047	0.0241078	NA	-0.748991	-0.259966	-0.323409	0.466519
AC092164.1	-0.668724	-0.967317	-0.140178	NA	1.06197	-0.20206	-0.262691	0.00469873
AC092171.3	0.204075	0.976318	0.353471	NA	0.0318966	-0.177214	-0.0174908	0.152517
AC092171.4	0.159957	-0.621346	-0.525678	NA	1.70207	-0.396941	-1.82318	-0.367809
AC092279.1	-2.18602	-0.172704	0.578135	NA	-1.51294	-0.0441608	0.856621	0.540623
AC092295.1	-0.175401	0.450259	0.528286	NA	1.07204	-0.200403	-0.316165	-0.730155
AC092296.2	-0.148458	2.67611	0.670368	NA	-2.04122	1.48251	3.12705	0.512906
AC092329.4	0.138628	1.15367	1.63915	NA	-0.0486897	-1.37819	-0.258497	-0.31085
AC092335.1	0.890729	-0.979324	-0.306067	NA	1.28711	-0.560387	0.112684	0.209107
AC092338.2	0.0573521	2.17393	0.688542	NA	-0.901797	0.0569596	0.728679	0.685826
AC092338.3	0.0795629	1.43893	0.818193	NA	-0.553847	-0.303732	0.216295	0.757786
AC092343.1	0.0178272	1.14242	0.709031	NA	-1.32825	0.201288	0.380348	0.29722
AC092376.1	-0.404584	0.81402	0.384718	NA	-0.318211	-0.308341	1.35731	0.466318
AC092376.2	-0.531448	-0.204241	0.16548	NA	0.572713	-0.770314	-0.186989	0.151969
AC092376.3	0.0755905	-0.00204917	-0.460463	NA	0.660444	-0.06166	0.121438	0.102938
AC092384.1	-0.46812	0.669485	1.02545	NA	1.35383	-0.0433664	0.35584	0.354994
AC092422.1	0.431948	1.52036	0.0356666	NA	-1.36141	-0.256848	0.365884	0.0707996
AC092428.1	-0.199232	0.470857	0.529837	NA	0.618965	0.499955	0.591668	0.782969
AC092445.1	-0.759371	-0.0402318	0.0114243	NA	-0.941673	0.0439947	0.89746	-0.057916
AC092535.4	-1.51746	-1.53072	-0.141978	NA	-0.725888	-0.537594	-0.216117	-0.100545
AC092546.1	0.0319925	-0.534694	-0.0920799	NA	2.78625	0.2153	0.119424	-0.555704
AC092567.1	0.136217	2.64171	0.683065	NA	-0.591058	-1.46104	0.182304	0.203212
AC092574.2	0.00594698	1.3429	0.644466	NA	-1.95885	-1.18803	1.28383	1.13739
AC092620.1	-1.43261	-0.147069	-0.0645543	NA	-1.65333	0.26461	0.296564	0.27285
AC092645.2	-0.0150352	1.30647	0.341389	NA	-0.0765814	0.224843	1.55176	0.184024
AC092650.1	-0.186949	-0.0213462	0.0261779	NA	-0.585865	0.28573	0.961546	1.57349
AC092652.1	-0.460829	0.117735	0.273167	NA	3.29345	-0.387213	-0.331683	-0.221903
AC092652.2	-0.353947	-0.137109	-0.1057	NA	1.4764	-0.373366	-0.121909	-0.182893
AC092666.1	-0.076307	1.85677	1.29808	NA	-0.743321	0.376578	0.598404	-0.00963031
AC092683.1	-0.379635	-0.905196	-0.202867	NA	-3.65724	0.853516	0.873278	0.579817
AC092691.1	-0.313769	-0.214024	0.240682	NA	-0.0860984	0.184448	0.22865	-0.441392
AC092691.3	0.00941232	1.18135	0.793338	NA	-0.201092	0.459071	0.202342	0.158433
AC092718.2	-0.121868	0.174365	1.09284	NA	-0.193824	0.484689	0.140566	-0.229418
AC092720.1	0.484142	-1.11991	-1.36507	NA	-0.534455	1.63505	3.33414	0.194215
AC092745.5	-0.855757	-0.491282	-0.0180881	NA	0.0354446	-0.341264	0.637422	-0.206391
AC092747.1	0.127943	1.00947	0.657519	NA	-1.56155	-0.312614	3.91593	0.648426
AC092747.4	0.148005	-0.18207	-0.0960597	NA	-0.063834	0.0310562	0.112228	-0.64255
AC092794.1	-0.0916699	0.0713737	0.358612	NA	0.116168	-1.33581	-0.67815	-0.128173
AC092802.1	0.056203	0.636982	-0.113051	NA	-1.22649	-0.664892	0.0474894	-0.00848425
AC092802.2	0.569708	2.27607	0.689736	NA	-0.619284	-0.498567	-0.451439	0.213172
AC092803.1	0.550925	0.330223	0.000587814	NA	1.79295	-0.06081	-2.50895	-0.408507
AC092805.1	0.0285796	-0.205933	0.971913	NA	1.50512	-0.824542	-0.0588648	0.135774
AC092809.2	0.0446498	0.44491	0.123003	NA	-1.11392	0.802729	0.472151	0.0722102
AC092809.4	0.216486	-2.64366	-0.43124	NA	-0.679641	-0.0603264	-0.498416	0.599892
AC092813.1	0.486906	-0.737141	0.173548	NA	0.201622	0.426081	1.14925	0.400232
AC092821.3	-0.165452	-3.16303	-1.15572	NA	-2.32666	-0.401043	0.00170453	-0.00196218
AC092828.1	0.027213	-0.131236	0.0650264	NA	0.0989765	-0.00580501	-0.0156438	0.0416874
AC092832.2	-0.19023	0.944832	0.0574125	NA	-0.683559	-0.297945	0.286284	0.440825
AC092835.1	-0.0390253	-0.978264	-0.471317	NA	-0.0581654	0.070021	-1.30611	-0.205256
AC092839.1	0.00911588	1.54135	0.911866	NA	-1.64066	0.42455	0.588889	0.830365
AC092844.1	-0.873658	0.132808	0.392684	NA	-0.64262	0.207742	0.953936	0.0813209
AC092902.4	-0.362782	-0.219146	-0.104124	NA	0.0414841	-0.149819	-0.322657	0.00898904
AC092910.3	-0.105214	-0.966668	0.231726	NA	0.073475	-1.46794	-3.02224	-0.235923
AC092939.1	0.0844085	1.14094	0.33478	NA	-0.823703	-0.00452739	0.266245	0.44024
AC092944.1	-0.335443	-3.48306	-0.0149611	NA	-0.0482684	-0.305501	0.120501	0.0789973
AC092969.1	0.407217	-0.204641	-0.283243	NA	0.434343	0.170779	0.648553	-0.00336546
AC093019.2	0.0043382	1.36823	0.794358	NA	-1.51544	-0.156633	-0.138871	0.795292
AC093110.1	-0.00214027	1.19409	0.446962	NA	-1.04299	0.160705	0.767676	0.33679
AC093157.1	-0.201102	-0.113822	-0.0473793	NA	-1.23529	0.292433	0.00240799	-0.421173
AC093158.1	0.122817	1.39473	0.434221	NA	-0.708492	-0.292455	0.583647	0.113899
AC093206.1	-0.0387144	0.955187	0.398131	NA	-0.913776	-0.686296	0.172506	-1.71233
AC093227.1	-0.100791	-0.308289	-0.151842	NA	-0.652626	-0.530952	0.0728315	0.0530101
AC093249.2	-0.427989	0.112378	0.0908496	NA	-0.0134029	0.0756419	0.0562461	0.492231
AC093249.6	1.61058	2.60279	0.157807	NA	1.0855	0.0874922	-0.270892	-0.237668
AC093297.1	0.135619	1.9574	0.539384	NA	-4.54101	0.228689	1.13667	0.166118
AC093297.2	0.123245	-0.272473	-0.159554	NA	0.228857	-0.843072	-1.1557	-0.216648
AC093298.2	0.100467	1.06645	0.671898	NA	0.426813	0.782392	0.506103	-0.209442
AC093305.1	0.00454094	1.02444	0.759892	NA	0.589021	0.0583651	0.415229	0.51974
AC093323.1	1.09897	-0.0195901	-0.314233	NA	2.88728	0.153557	-1.72053	-0.47
AC093495.1	0.0691605	2.1732	1.00379	NA	-0.662101	0.0204292	0.232794	0.549426
AC093496.1	-0.355741	-0.210003	0.344241	NA	0.152464	-1.6036	-3.78511	0.171354
AC093512.2	0.805454	0.0550367	-0.23638	NA	-0.00823454	-0.59796	0.276627	0.0863417
AC093523.1	-1.38713	-2.83728	-0.656563	NA	0.332816	-0.299344	-0.895194	0.415529
AC093535.1	0.342704	0.297439	-0.0396159	NA	-0.0757225	-0.170771	-0.546755	0.293267
AC093567.1	0.0288832	2.23721	1.04091	NA	1.12709	-0.0110694	-0.109087	0.577495
AC093610.1	0.376522	2.68378	0.7204	NA	0.684726	0.901738	0.577479	0.153535
AC093627.3	-0.00187154	-0.392214	-0.175736	NA	0.315206	-0.141508	-0.130417	0.119117
AC093635.1	0.114393	-0.200749	0.0340893	NA	0.177048	0.0189201	-1.28181	-0.102339
AC093690.1	0.112362	1.69606	1.34755	NA	-0.540202	-0.000180339	0.234128	0.238596
AC093765.2	0.107421	1.25827	0.35704	NA	-1.5885	-0.478209	0.110101	-0.109075
AC093765.3	0.2078	-0.508846	-1.01763	NA	-0.462224	-0.702706	0.149363	-0.613349
AC093765.4	0.128052	-0.39485	-0.387947	NA	-0.263145	-2.34871	0.0385645	-0.169456
AC093765.5	0.455403	-0.654438	-0.105731	NA	0.494141	-0.146501	0.336519	0.112689
AC093766.1	0.759697	1.94382	0.902981	NA	-0.40465	0.573034	0.807741	0.0336711
AC093801.1	-0.127489	0.186741	0.303209	NA	-0.043557	-0.129726	-0.102997	0.269239
AC093817.1	0.171305	0.238749	-0.10616	NA	-0.327611	-0.481071	0.0367248	0.341975
AC093817.2	0.136867	0.349034	-0.467277	NA	-0.898571	-0.581071	0.559141	0.735451
AC093827.4	0.283124	-0.454622	-1.31304	NA	-0.0712288	0.349072	0.401738	0.473358
AC093849.4	0.115262	-0.214207	0.124695	NA	0.987042	-0.150033	-0.0782986	-0.692194
AC093865.1	-0.369317	-0.300979	1.17721	NA	0.432658	-1.09598	-0.455533	-0.111178
AC093866.1	0.226322	0.921125	1.13897	NA	-3.65679	-0.254866	0.147206	-0.213905
AC093879.1	0.0716618	1.5754	0.999088	NA	-3.16705	0.516458	0.783791	0.509284
AC093898.1	-3.95623	-3.9789	-1.9394	NA	-0.321375	-0.387302	-0.797471	0.0549747
AC093912.1	-0.106239	0.308247	-0.0647125	NA	-0.583508	-0.0428937	-0.284725	-0.034192
AC093928.1	0.0802469	0.173236	-0.0105692	NA	-0.374366	0.000381316	0.369306	0.149196
AC095032.1	0.126007	-0.589955	-0.0140392	NA	-2.50584	-0.359413	0.206493	-0.447378
AC095057.3	-0.10704	-0.889874	-0.424844	NA	0.735735	-0.501204	-0.247112	-0.0646963
AC095060.1	-0.0978039	-1.30356	-0.215779	NA	0.16521	0.802057	0.528848	-1.22294
AC095350.1	0.139181	0.606863	0.179129	NA	-1.12503	-0.477283	0.24286	0.394859
AC096536.3	0.279762	1.08395	0.664874	NA	0.414061	-0.67109	-0.563555	-0.174864
AC096564.1	1.50666	3.53748	0.119899	NA	-0.158506	-0.240766	0.183105	0.0123779
AC096570.1	-0.534901	0.308291	-0.0869047	NA	0.0327359	0.369809	0.6107	0.141758
AC096570.2	-0.0805596	2.37448	0.526886	NA	-0.57737	0.120784	1.32762	0.388019
AC096576.2	-0.0379342	1.07104	0.503727	NA	-1.11783	-0.0731934	0.298755	0.422917
AC096576.3	0.0024144	1.21993	0.54437	NA	-0.510671	-0.0256307	0.378056	0.687822
AC096576.6	-0.739399	-0.00194153	0.104897	NA	0.10968	-0.690234	0.24838	0.0144334
AC096642.1	0.174535	-0.956258	0.319669	NA	0.899187	0.515973	-0.105908	-0.0704848
AC096667.1	0.533477	-0.330288	-0.0833826	NA	4.93073	-1.14774	-3.11611	-0.768703
AC096669.1	-0.225838	0.704382	0.898653	NA	-0.188131	-0.39906	0.39912	0.746403
AC096677.1	0.694977	-1.18304	-0.236583	NA	0.775222	0.0629201	0.567871	0.428689
AC096711.2	-0.721059	-0.46783	0.0829325	NA	0.271202	1.77829	-0.189861	0.334582
AC096719.1	-0.764672	-1.18588	-0.184332	NA	-1.1416	0.728265	0.449263	-0.161589
AC096733.2	-0.113975	-0.150991	-0.00938229	NA	-0.325763	0.030041	-0.133681	0.0201925
AC096741.1	0.0963501	1.86055	0.804849	NA	-1.58518	0.837552	0.318895	0.523306
AC096747.1	0.0657573	1.8657	0.659272	NA	-3.80716	0.81049	0.731854	-0.0758005
AC096992.2	0.433456	1.93258	0.120963	NA	-0.73216	0.0187052	-0.0174175	0.327735
AC097376.3	0.0277312	0.120034	-0.00159173	NA	-2.57372	0.141666	1.47964	0.241306
AC097382.3	0.432815	-0.201221	-0.283135	NA	7.24187	-0.154574	-3.58593	-0.777379
AC097448.1	0.137065	1.55777	1.33608	NA	-0.264502	-0.104292	-0.882031	0.0946565
AC097460.1	-0.363029	-1.43649	-1.43964	NA	0.186479	0.527911	2.20775	-0.0114796
AC097467.3	0.161114	1.75435	0.849443	NA	-0.638429	0.0215889	0.251739	0.16466
AC097468.2	-0.141801	0.251536	0.429301	NA	-0.218616	0.13739	0.56846	0.358498
AC097487.1	0.138184	1.67794	0.0258824	NA	-1.21224	0.111485	1.04984	0.306399
AC097500.1	-0.181408	-1.82226	-0.310988	NA	0.338515	-0.0495061	0.138556	0.235995
AC097511.1	-0.0591112	1.62365	1.06987	NA	-0.327497	0.765653	0.536441	0.0586541
AC097515.1	-0.0604021	-2.55911	-0.322607	NA	-0.210419	-0.110138	0.987206	0.364693
AC097522.2	0.274472	0.938273	0.443457	NA	-1.59741	0.477711	1.20052	0.309943
AC097532.2	-0.0903339	-0.385002	0.0154745	NA	0.48459	0.344123	-0.967617	-2.78525
AC097532.3	1.01533	-0.125936	-0.17441	NA	-0.106403	-0.764389	0.153426	0.0569314
AC097534.1	1.13128	-0.250535	-0.159297	NA	1.80248	-1.04715	-0.129611	0.270026
AC097534.2	0.157385	-1.11442	-0.816845	NA	1.66501	0.0635579	-0.239358	-0.313472
AC097537.1	0.0844741	1.57759	0.730237	NA	-0.770326	0.883092	0.18922	0.364034
AC097634.3	-0.0940143	1.83871	0.286551	NA	-2.69615	0.60799	0.744611	1.35151
AC097658.3	0.574433	0.801098	0.694452	NA	0.0538937	0.359292	-0.137672	0.151944
AC097662.1	0.578028	1.89941	0.294061	NA	-2.45515	-0.0860621	0.868225	-0.126322
AC097716.1	0.0175683	1.63238	1.07451	NA	-3.43756	0.242166	0.666854	1.30609
AC098484.4	0.0752355	1.40859	0.00650969	NA	-1.18239	0.439648	0.645533	1.24495
AC098487.1	1.01986	-0.445299	-0.590157	NA	3.18861	-0.285956	-3.94416	-0.370623
AC098588.3	-0.561572	0.102276	0.103006	NA	-1.61082	0.0175726	0.621634	0.60832
AC098617.1	0.507231	1.4265	0.601228	NA	-0.203302	1.18029	0.419846	0.289212
AC098829.1	0.15865	-0.0341569	-0.318327	NA	-0.35966	-0.3688	0.665043	-0.987413
AC098851.1	0.0371857	0.807123	0.294165	NA	-0.640554	0.341649	0.604058	-0.166269
AC099066.2	0.0638404	1.2301	0.914748	NA	-0.291405	0.197788	1.28058	0.354055
AC099329.1	0.293696	0.095875	0.332521	NA	-1.19179	0.281987	0.891579	0.0466396
AC099343.3	1.33651	-0.196466	-0.109513	NA	-0.00620069	-0.312517	-0.360327	0.0152034
AC099343.4	-0.173946	0.622636	0.380984	NA	0.255044	0.0658154	1.14041	0.115498
AC099489.1	0.0171285	0.0462794	-0.192646	NA	-0.405898	-1.04161	0.123848	0.358921
AC099520.1	-0.975785	0.348703	0.499456	NA	-0.807028	1.1017	1.17217	0.606932
AC099521.3	1.09637	-0.0540957	0.0839626	NA	2.97303	0.288475	-0.560097	-1.39134
AC099522.2	0.929193	-0.211995	-0.311195	NA	1.11865	-0.533891	-0.533732	-0.0768291
AC099535.2	0.322659	1.35739	0.785566	NA	-0.953133	0.0551073	0.0876506	0.433871
AC099568.2	0.489228	0.29991	0.278422	NA	1.31053	-0.249771	-0.0691195	-0.302844
AC099661.1	-0.117165	-0.307389	-0.31666	NA	4.18936	0.037162	-1.0587	-0.0340879
AC099753.1	-1.45692	-0.219324	0.336763	NA	1.05875	0.185238	0.166356	0.369726
AC099778.1	0.323592	-0.310097	0.173629	NA	1.75456	-0.507081	-1.44984	-0.680417
AC099788.1	-0.991612	0.504481	0.20796	NA	-1.76336	-0.141562	0.358241	0.123509
AC099791.2	0.0497476	1.11716	0.60454	NA	0.545536	-0.718016	-0.150922	0.0351307
AC099792.1	-0.250421	1.03826	0.724574	NA	-0.223531	-0.100377	0.239817	0.252288
AC099850.1	-0.0410644	0.893167	0.780882	NA	1.39227	0.275951	-0.317827	-0.200298
AC100763.1	0.112419	2.1326	0.890836	NA	-1.02512	0.0623105	0.432827	0.393622
AC100771.2	0.00410825	0.46412	0.274615	NA	0.849314	0.108445	0.551287	-0.127615
AC100774.1	-0.520784	1.09288	-0.0118318	NA	-3.92795	-0.0343827	1.37802	0.0525169
AC100793.2	1.31839	0.524892	0.319516	NA	-0.00259919	1.63934	0.0472153	0.623381
AC100793.3	0.271146	4.52244	0.38222	NA	-1.00207	-1.08588	0.734678	0.241826
AC100800.1	-0.0903384	1.25793	0.940381	NA	-0.105559	0.11937	0.253351	0.0698921
AC100803.4	0.218127	0.890395	0.277781	NA	-0.577614	-0.0872511	0.92606	-0.281408
AC100810.1	0.674855	1.25776	0.303372	NA	0.0154088	0.152212	-0.188043	-0.241626
AC100814.1	0.0206632	0.525046	0.134711	NA	-0.571861	0.0702203	-0.0511794	0.371987
AC100830.1	0.600686	0.895217	-0.0548416	NA	-0.0454431	-0.0164741	1.03749	0.566334
AC100832.2	-0.175385	1.03657	1.10172	NA	0.0450994	1.39457	1.70574	0.328173
AC100839.1	0.752052	1.32354	0.743078	NA	-0.826997	0.195855	0.143034	1.51469
AC100839.2	0.137451	0.754956	0.347038	NA	0.659351	0.0613789	0.0400536	0.1998
AC100849.1	-0.797613	0.240507	0.131008	NA	-0.0371014	-0.590132	0.248874	0.0299961
AC102953.2	0.816733	-0.5813	-0.394249	NA	2.38774	1.6469	0.457142	0.255315
AC103703.1	-1.39204	-1.27167	-0.629258	NA	-0.442846	0.0113693	0.289455	0.364914
AC103706.1	0.780188	1.18185	0.85491	NA	0.193508	-1.30007	-1.17192	0.060982
AC103726.1	-0.276855	0.0259407	-0.0113577	NA	-0.34707	-0.33595	-0.022608	0.11522
AC103726.2	0.0131984	1.23133	0.651964	NA	-1.43043	0.479369	0.419666	0.9219
AC103739.2	-0.451652	0.378855	-0.0081381	NA	-0.663575	-0.0723416	0.258701	0.538706
AC103740.1	0.0185931	1.2415	0.497841	NA	-0.0120873	0.614904	0.403812	0.385039
AC103758.1	0.469572	0.709009	-0.170321	NA	-0.271872	-0.0773058	2.5638	-0.39963
AC103770.1	-0.211536	-0.0496918	-0.0330874	NA	-0.16808	-0.43458	-0.26137	0.0296134
AC103810.2	-0.393858	0.648373	0.472558	NA	0.218403	0.244285	0.747814	0.390602
AC103843.1	0.141366	1.93345	0.643437	NA	-2.40061	0.365621	2.48909	0.139748
AC103876.1	0.0371823	0.68773	0.117837	NA	-2.57568	0.384472	4.00427	1.06433
AC103923.1	-0.310683	-2.05587	0.00629107	NA	1.88726	-0.699329	-0.0133061	-0.279333
AC103974.1	-0.055334	1.13389	1.03443	NA	-0.0247278	0.27692	0.281922	0.464966
AC104002.3	0.153828	1.5303	0.268512	NA	-0.604884	-1.09575	0.0774987	0.0201706
AC104024.4	-0.913765	-0.792972	0.187708	NA	3.13634	0.425	0.103146	0.0611457
AC104041.1	-1.0303	-2.46904	-4.43643	NA	-0.744078	0.811247	0.52115	0.702844
AC104066.4	-0.00460319	0.678633	0.328389	NA	0.724629	-0.129855	0.10896	0.591197
AC104072.1	0.522842	-0.0128404	-0.0215276	NA	0.964734	-0.450556	-0.800528	0.0578321
AC104083.1	1.61466	-0.619264	-0.472904	NA	1.13096	-0.259581	-1.19199	-0.12498
AC104117.3	0.922076	0.430095	-0.202034	NA	-1.36035	-0.0285443	-0.00314636	0.556064
AC104123.1	-0.0252388	1.69638	1.62157	NA	-0.313478	0.991237	0.0676394	0.268033
AC104126.1	0.428412	1.76224	0.208013	NA	0.0308542	0.0595876	0.0306814	0.673598
AC104134.1	-0.165308	-0.041545	0.0718093	NA	-1.00781	0.0627099	0.170137	0.487507
AC104135.1	-1.26096	0.0220272	-0.156721	NA	7.43959	-0.870255	-1.69899	0.814947
AC104162.2	-1.06256	-1.18521	-0.0519445	NA	0.479018	0.0333904	0.0316964	-0.206332
AC104170.1	-0.955069	-0.199504	-0.171588	NA	-0.723157	-0.886986	0.770902	0.25565
AC104211.1	-0.310208	0.750173	0.474009	NA	-0.345427	-0.96265	0.0812245	-0.0558321
AC104232.3	-1.44731	-6.67955	-0.290548	NA	-0.261288	-0.323282	0.161458	-0.271575
AC104248.1	0.627415	0.253489	0.0343328	NA	0.501217	0.212082	0.412336	-0.959353
AC104316.1	0.094323	1.24449	0.602237	NA	-1.75814	0.225845	0.038902	0.610747
AC104335.1	-0.0128282	1.19898	0.846528	NA	-1.08306	0.197599	1.45589	0.923073
AC104335.2	0.409919	1.76041	0.236187	NA	-0.651529	0.00416365	2.00111	0.378022
AC104365.1	-0.0228686	1.12567	0.656074	NA	-1.62815	-0.276059	0.239357	0.284406
AC104383.2	0.0665497	-0.379208	0.00192157	NA	-2.02068	-1.14258	-0.0948123	-0.0189816
AC104389.5	-0.0899847	1.61744	-0.0386367	NA	-1.23498	-0.213319	-0.433086	0.0688592
AC104461.1	0.148333	2.11103	0.671979	NA	-2.14813	-0.319488	-0.369006	0.16737
AC104506.1	0.0991454	0.936634	0.278076	NA	0.0729268	1.61711	0.138105	0.0247905
AC104530.1	-0.1673	-0.151522	0.00960505	NA	-0.136758	0.834966	0.407741	0.586764
AC104532.2	0.703716	1.58477	0.585522	NA	-0.685312	-0.243792	0.357889	0.0601404
AC104574.2	-0.0112312	-0.680028	-0.0117298	NA	0.704186	-0.0173033	0.246158	0.455134
AC104596.1	-0.456344	-4.69391	-0.573853	NA	-1.83252	0.268757	4.76201	0.46873
AC104653.1	-0.0965512	0.111182	-1.32916	NA	0.0365993	-1.09541	0.0860158	-1.67779
AC104655.1	-0.191986	1.61628	0.542593	NA	-1.15149	-0.047236	0.356917	0.874965
AC104689.2	0.131333	-0.182389	0.175487	NA	-1.38728	0.125624	1.43307	0.377605
AC104699.1	0.313578	0.356529	-0.125591	NA	-0.335219	-1.0065	0.103743	0.196963
AC104781.2	0.0028239	1.28243	0.645697	NA	-0.135126	0.0898902	-0.244438	-0.0061819
AC104794.3	-0.00612486	-0.935625	-0.062463	NA	3.63698	0.0376176	-0.386084	-1.13063
AC104803.1	-0.0767967	1.50453	0.606111	NA	-1.19019	1.11791	0.448024	0.256729
AC104806.2	-0.217549	-0.314324	0.0389132	NA	0.40815	-2.03197	-0.14099	-0.104885
AC104825.1	0.0212784	0.682472	0.528661	NA	0.536609	1.19068	0.107448	0.13756
AC104827.1	0.251284	1.63162	0.63697	NA	-1.75536	-0.0633885	0.236322	0.505142
AC104850.2	0.168033	1.15928	0.903879	NA	-0.424386	0.730086	0.0641838	-0.145944
AC104938.1	-0.654948	-0.450025	-0.103091	NA	-0.508134	0.165948	-0.361733	-0.367594
AC104964.1	-0.402361	-0.0332738	0.076463	NA	-0.231585	-1.50565	0.204611	-0.0529918
AC104964.3	0.635423	0.793841	-0.161396	NA	-0.249923	0.305928	0.448554	0.021562
AC104964.4	0.45399	-0.314444	-0.0632468	NA	1.19048	-0.312574	-0.0636827	-0.0642193
AC104982.2	-0.0846187	2.23821	0.613261	NA	-4.20731	0.114532	0.291635	0.609306
AC104984.2	1.80212	0.0499927	0.00600184	NA	0.570777	0.356549	0.0548568	-0.14361
AC104984.3	0.0883591	2.14116	1.23106	NA	-1.02634	-0.119715	0.545344	0.639098
AC104984.5	0.287474	1.82782	0.376023	NA	-3.30807	0.378115	1.76258	0.564673
AC105001.1	0.223614	2.12509	0.387851	NA	-1.71409	0.149681	1.14481	0.408417
AC105052.4	-2.45213	-0.440487	-0.688203	NA	-6.55639	0.974	4.89008	0.683467
AC105052.5	0.257469	-0.791452	-0.382928	NA	-0.536313	0.0414523	0.481448	-0.146425
AC105094.2	-0.292775	-2.31069	-0.714167	NA	0.0345125	-1.14799	0.5508	0.129164
AC105114.2	0.0367418	1.20902	0.703347	NA	-1.22558	0.209237	0.300377	0.209716
AC105206.2	0.0999773	1.32209	1.06697	NA	-0.200475	-0.844211	0.462489	0.175096
AC105230.1	-0.0368888	1.11262	0.38054	NA	-3.32376	0.416334	0.440491	0.375659
AC105285.1	-0.548058	-0.972268	0.079496	NA	0.259132	-1.53553	-1.84569	0.0845363
AC105339.3	-0.065278	1.07697	0.211399	NA	-1.22172	-0.228023	1.12651	0.305392
AC105339.6	0.961087	0.954611	0.163234	NA	0.0231712	0.31458	0.233599	-0.0282074
AC105345.1	0.168261	-0.0634934	-0.119073	NA	-0.437167	-0.093317	0.767692	-0.518026
AC105383.1	0.278362	-1.77462	-0.692799	NA	1.17691	-0.562911	-0.387589	-1.19248
AC105384.1	0.0601469	3.30111	0.331665	NA	0.496673	0.678279	0.781487	0.402982
AC105402.3	0.254941	3.29985	0.155516	NA	-0.470004	1.27733	0.151493	0.330878
AC105402.4	-0.0998341	1.09708	0.570204	NA	-0.174204	-0.123788	0.563515	0.419117
AC105411.1	-0.140199	-0.488694	-0.468944	NA	-0.474389	-1.41139	-0.0254616	0.489614
AC105429.1	-1.38361	-0.543084	0.634714	NA	0.15602	-1.62642	-0.0253228	-0.0145086
AC105430.1	-0.163915	1.20866	0.0524085	NA	-0.161723	-0.222526	1.56543	-0.0211409
AC105450.1	-0.0718155	1.27702	0.210963	NA	-0.320064	1.01383	0.52015	0.0361982
AC105916.1	-0.833289	0.348215	-0.183762	NA	-0.271887	-1.34872	0.363525	0.00559901
AC105941.1	0.327021	0.351897	0.146604	NA	-0.691142	-1.33755	0.0311864	-0.377446
AC105942.1	-0.781872	-0.895067	-0.142202	NA	0.0010306	-0.137906	0.162274	0.0609787
AC106052.1	0.160352	-0.0605735	0.85327	NA	0.376279	0.0269275	-1.15694	-0.374899
AC106707.1	0.00648148	1.94733	1.30016	NA	-0.0598682	-0.14495	-0.786113	0.0568363
AC106729.1	-1.01563	-2.79706	-0.390738	NA	-1.46408	-0.28886	0.563397	-0.183655
AC106736.1	0.084284	0.803845	0.130671	NA	-0.276613	-0.391015	0.200714	0.374173
AC106779.1	-0.347426	-2.1921	-0.0321291	NA	2.09933	-0.0585456	-0.66764	-0.0914033
AC106791.1	-1.59449	-1.69254	-1.11955	NA	-0.378144	-2.24996	-0.348523	-0.703978
AC106793.1	-1.08893	-0.326732	0.0532133	NA	-4.00552	0.456099	0.837656	1.15964
AC106795.3	-1.26377	0.169158	0.128776	NA	-1.70654	-0.457922	1.17339	-0.0696908
AC106818.2	0.000584511	1.95323	0.980982	NA	-1.16663	0.471581	0.222759	0.431909
AC106845.1	0.251329	3.20593	1.08521	NA	-0.869417	-0.570225	1.06633	0.760049
AC106881.1	0.0287309	-0.21315	0.233115	NA	-0.0546728	-0.275306	-0.208762	0.0207489
AC106897.1	-0.0141353	-1.23956	-1.32511	NA	0.0110577	-0.256354	0.551534	-0.433296
AC107021.1	0.0647861	1.37627	0.722354	NA	-1.91997	0.107865	0.786906	-0.00755499
AC107029.2	0.0265503	1.37006	0.113703	NA	-2.42279	0.184001	1.43446	-0.647428
AC107032.2	-0.543009	0.0611164	0.138261	NA	-1.84074	0.0921598	2.08485	0.236338
AC107068.1	0.00998398	-0.163599	-0.110383	NA	-0.162745	0.859036	0.00605184	-0.0362005
AC107068.2	0.0889776	1.81849	0.965331	NA	-2.21288	0.290553	0.149921	0.109444
AC107072.2	-0.163202	1.45899	0.984251	NA	-0.306968	1.05482	0.321639	0.52166
AC107081.2	0.0461566	1.09332	0.661358	NA	-3.6283	0.0463808	-0.0828265	0.17559
AC107204.1	-0.74761	-0.0445574	-0.138975	NA	-0.502819	0.197763	-0.180245	-0.11405
AC107214.1	0.0134822	0.198607	-0.0395628	NA	1.7004	-1.09691	-0.725441	-0.287181
AC107223.1	-0.639833	-2.78188	-1.08853	NA	0.1169	-0.268845	0.331785	0.077206
AC107294.2	0.630983	-1.02977	-0.196277	NA	-0.620771	-0.115549	-0.00676327	0.152731
AC107375.1	-0.272833	-1.282	-0.696628	NA	2.38591	0.258379	-0.459472	0.392652
AC107398.3	0.257574	0.399802	0.252882	NA	0.711449	0.22478	-0.315383	0.341439
AC107419.1	-0.0465937	0.658169	0.147684	NA	-0.300178	-0.317259	-0.594395	0.00395475
AC107464.1	0.659692	-0.198052	-2.03522	NA	-0.441204	-1.73235	0.425839	-0.117103
AC107464.3	0.30514	0.416222	0.337265	NA	1.92268	-0.152427	-0.0742975	-0.0434514
AC107871.2	0.434598	0.907246	0.39911	NA	1.41463	-0.263687	-0.530823	0.855904
AC107884.1	-0.174898	0.480984	0.0826689	NA	0.18009	0.25418	-0.117453	-0.0549887
AC107918.6	0.712995	3.0793	0.375645	NA	-0.0323235	0.877804	1.29474	-1.48993
AC107952.2	0.76553	-0.391461	-0.426628	NA	-0.222986	-1.11177	-1.32827	-1.29607
AC107959.1	0.0802996	1.42501	0.487476	NA	-0.26176	0.270061	0.375759	0.0733584
AC107980.1	-0.290236	0.994828	0.957956	NA	-1.39794	-0.970766	0.163061	-0.127997
AC107993.1	-0.365128	0.413069	0.352649	NA	-0.478252	-0.0981644	0.587615	-0.227106
AC108047.1	-0.438743	-0.0756827	0.114869	NA	-0.013193	0.518462	-0.569487	-0.367882
AC108156.1	0.155673	1.97122	0.585257	NA	0.203549	-0.579032	0.535563	0.951265
AC108159.1	-0.000861513	1.55066	0.530072	NA	-0.759987	-0.346877	0.194942	0.429545
AC108169.1	-1.29386	0.115964	0.0802801	NA	-0.294292	0.678754	0.0886717	-0.180383
AC108449.1	0.0889588	1.8909	0.904405	NA	-1.19761	0.480386	1.55456	0.54338
AC108452.1	-0.12289	0.395248	0.641522	NA	-0.731685	1.3349	2.54237	-1.27149
AC108471.2	-0.96477	-6.553	-0.316395	NA	0.469851	-0.028467	0.331871	-0.145931
AC108471.3	0.693146	0.647467	0.558024	NA	0.837066	0.407532	0.0888543	0.620585
AC108472.1	0.424599	0.895802	0.490227	NA	-1.35863	-0.048852	0.484986	0.421101
AC108519.1	-0.723168	-0.850231	0.467471	NA	-1.31094	-0.779566	0.0036792	-0.0862495
AC108673.3	0.22812	1.28416	0.889811	NA	1.57226	-0.717167	-2.80265	-1.62452
AC108690.1	0.36729	0.0384348	0.375083	NA	-1.89907	-2.94548	-0.801664	0.241891
AC108861.1	0.37202	1.32481	0.901477	NA	-0.936758	0.30479	0.658156	0.565009
AC109129.1	0.0814895	1.3644	0.0833429	NA	-0.559997	0.227328	0.291228	0.236327
AC109322.2	-0.211447	1.22234	0.10797	NA	-0.941882	0.152513	0.308262	0.617745
AC109347.1	2.17231	-0.0965874	-0.607744	NA	4.47067	-0.318343	-3.17594	-0.767874
AC109361.1	-0.474315	-0.444031	0.347458	NA	0.141149	0.181275	0.732806	0.422207
AC109441.1	0.0746569	1.31123	0.522124	NA	-0.350143	0.630505	0.54566	0.39971
AC109446.3	0.155915	1.4656	0.960843	NA	-1.23388	-0.318166	0.274687	0.124694
AC109454.2	-0.0788143	1.82546	1.86025	NA	0.659079	0.0939447	1.25346	1.07843
AC109460.2	-0.163835	1.58536	0.925206	NA	-0.915887	-0.605108	0.564708	0.307414
AC109466.1	-1.2068	-0.294381	0.386631	NA	-0.40094	-0.793767	-0.284388	0.229
AC109587.1	0.0741741	0.995274	0.368586	NA	-0.709622	-0.468528	0.0655406	0.241605
AC109597.1	-0.0714666	2.34256	0.589359	NA	-1.84071	-0.207645	0.278703	0.129212
AC109811.1	0.0588721	1.63797	0.511647	NA	-3.12117	-0.0336974	0.960444	0.343721
AC109927.1	-0.308953	0.659995	0.614516	NA	-0.854932	0.0943063	1.66878	-0.19581
AC110015.1	0.149592	2.26942	1.07726	NA	-2.288	-0.369712	0.325411	0.254046
AC110023.1	-0.186697	0.867255	0.312263	NA	-0.361197	-0.074417	0.557229	0.150149
AC110285.1	-0.953882	-0.472253	-0.336427	NA	1.41942	-0.499271	0.268833	-0.0947673
AC110285.2	0.249955	0.112644	-0.731905	NA	0.2025	-0.38597	0.565653	0.415484
AC110296.1	0.00732906	1.6836	0.636289	NA	-0.266953	-0.268895	-0.0524153	0.424688
AC110491.1	0.718527	0.0530275	0.00631604	NA	0.246306	-1.48629	-1.30821	0.0699011
AC110611.1	-0.0313796	1.47812	0.715744	NA	-2.6342	-0.0691781	1.88604	1.05293
AC110716.1	-0.822244	-0.218855	-0.418667	NA	-0.694901	-0.262887	-0.0441194	-1.94948
AC110760.1	0.0690721	1.0958	0.244331	NA	-0.605233	0.0818874	-0.0389164	0.60837
AC110769.2	-0.122933	0.641619	0.482922	NA	1.28474	-0.153074	-0.651627	-0.677117
AC110795.1	0.060948	0.836044	0.872237	NA	-0.261861	0.411688	0.327473	0.741082
AC111006.1	-1.73452	-4.78496	0.160732	NA	-0.847197	1.65258	1.21708	-0.0815477
AC112196.1	0.437107	1.98846	1.24259	NA	-0.174791	0.16733	0.0100098	0.595608
AC112206.2	-0.370192	-0.736697	-0.171477	NA	1.6426	0.179084	-0.340263	0.0459449
AC112220.2	0.840191	-0.743689	-3.52224	NA	-0.456561	-1.60046	-1.86327	-0.137739
AC112493.1	-0.836057	0.368311	0.0778623	NA	-0.14777	-1.16388	-1.03244	-0.0122841
AC112719.2	-0.013828	0.900319	0.434035	NA	-0.0254826	0.240062	0.0116306	0.181402
AC112722.1	0.877157	0.163542	0.225632	NA	-0.965483	-0.427738	0.231093	-0.105266
AC113137.1	-0.266081	-0.152456	-0.280229	NA	0.514774	-0.535665	0.960297	-0.0903427
AC113143.3	0.00790688	-0.573567	-0.024113	NA	0.237701	0.0129643	0.632103	0.302751
AC113346.2	-4.16158	-0.210908	-0.0649156	NA	0.300652	0.0058839	0.515795	-0.142047
AC113383.1	0.0902783	1.15544	1.13442	NA	-0.792286	-0.0208324	1.86235	1.71981
AC113385.1	0.216709	0.530356	-0.0697119	NA	-1.6714	-0.236251	0.595215	0.425175
AC113386.1	-0.0729912	1.53291	0.425558	NA	-0.0442335	0.0691514	-0.220781	0.334626
AC113404.1	0.194354	2.04995	0.28799	NA	-0.675984	-0.0800451	0.412142	0.444608
AC113410.4	3.25939	-0.236002	-0.58862	NA	1.30424	-0.32284	-0.404496	0.177527
AC113414.1	-1.49538	-0.33845	0.300273	NA	-2.29367	-0.259892	0.767727	0.617854
AC113423.2	-0.155046	0.642516	0.520588	NA	0.0897088	0.456972	0.494253	0.960474
AC114284.1	0.796282	0.893463	0.503741	NA	0.0840623	-0.607633	-1.07797	-0.397815
AC114316.1	0.808149	0.222001	0.180572	NA	-1.07288	-0.0166925	0.0166332	-0.476759
AC114321.1	-1.73651	-0.200981	0.8156	NA	-0.288594	-0.0334567	0.286202	0.184212
AC114485.1	-0.527241	-0.0431052	0.20972	NA	-0.28492	-0.319764	0.0442477	0.0746124
AC114546.1	-0.0729235	1.57493	0.617969	NA	-0.901065	-0.0667067	2.26919	0.623471
AC114689.3	-0.320533	0.58699	0.0280572	NA	-2.04092	1.03378	1.17107	0.020199
AC114763.1	0.586361	-0.701489	-0.0132572	NA	-2.28647	0.405652	0.338749	-0.136034
AC114781.2	-0.412243	0.83	1.26179	NA	-0.0306654	1.62399	0.0839688	0.330339
AC114811.2	-0.243177	-1.7553	-0.127381	NA	0.958003	-0.947306	-0.559979	-0.298663
AC114930.1	-0.754925	0.56416	0.872469	NA	0.103053	-0.068497	0.00944146	0.913733
AC114939.1	0.0793992	3.11659	0.829606	NA	-0.933964	-0.014866	0.864535	0.584029
AC114956.3	0.57186	0.0473474	-0.0152792	NA	-2.20061	0.27691	0.99413	0.336367
AC114971.1	0.752173	0.193302	-1.63633	NA	1.64932	-0.320364	-1.64627	-0.727294
AC114980.1	-0.563456	-0.299906	0.0113685	NA	0.0719991	-0.248874	0.0322911	0.0923976
AC115282.1	-1.02169	-0.298965	0.00820067	NA	0.0485909	0.0157335	0.0942808	0.225869
AC115284.4	-0.169328	-0.998288	-0.0774762	NA	-0.723191	-0.257554	0.341899	0.463855
AC115622.1	0.193242	-1.13088	-0.362384	NA	1.57838	0.337508	0.623734	-0.520748
AC116158.3	0.0346619	0.390245	-0.0254779	NA	0.260597	-0.416265	0.000169132	-0.227694
AC116348.2	0.161881	-0.614166	-0.41212	NA	-0.751634	-0.953454	-0.203112	0.0991866
AC116348.3	-0.332243	-0.691319	0.106767	NA	-0.805206	-0.756947	1.1254	0.138517
AC116362.1	0.358202	1.01058	0.0623373	NA	-0.821241	-2.04044	0.0134386	0.250382
AC116407.2	0.982664	0.255378	-0.237897	NA	-0.178219	0.0838132	-0.56276	-0.962802
AC116428.1	0.152923	1.49217	0.517403	NA	-0.365987	0.362167	0.270114	0.464459
AC116534.1	-0.0374664	1.5167	0.893068	NA	-1.05718	-0.378768	0.11563	0.05613
AC116535.1	0.00962922	1.05852	1.50435	NA	0.131844	0.109707	0.750966	0.3178
AC116565.1	-0.308137	-1.14595	0.151729	NA	-0.555112	-0.157518	0.850358	0.127615
AC116616.1	0.578833	1.59644	0.472365	NA	-0.994532	-0.59609	0.556257	0.274601
AC116666.1	-0.0305772	1.00601	0.399167	NA	-0.377657	-0.560804	-0.028068	0.370128
AC116667.1	-0.393918	-0.236827	-0.0345489	NA	-0.165512	-1.08632	0.0121811	0.189927
AC116667.2	-0.348103	1.22641	0.542066	NA	-0.863723	-0.355804	0.723757	0.765268
AC116903.2	-0.663848	0.284934	0.752363	NA	0.860887	-0.715946	0.56107	0.886045
AC116913.1	0.489296	0.36348	-0.0150895	NA	0.060833	-0.421215	-0.832184	0.0292875
AC117377.1	-0.540127	0.692935	0.37152	NA	-1.46585	0.517423	0.215487	0.156283
AC117383.1	-0.653904	1.21743	0.519898	NA	2.13337	-0.649875	1.75991	-0.0832621
AC117386.2	-0.905224	-0.149037	-0.0306421	NA	0.533474	-0.0716657	1.37055	0.416974
AC117453.1	-0.242522	1.3183	1.23446	NA	0.620289	-0.195791	-0.0617955	0.0163888
AC117461.1	-0.0241406	1.13499	0.408358	NA	-1.08016	0.0416703	0.31831	0.542335
AC117480.1	0.146511	1.69152	0.469057	NA	-1.79595	0.680585	1.36205	0.365603
AC117481.1	0.145698	0.47342	1.3321	NA	0.0160949	0.341278	0.858123	0.0957775
AC117528.1	0.57465	0.670018	-0.0157972	NA	-0.534798	1.21606	0.680948	0.394218
AC117834.1	-0.0152904	1.57113	0.984681	NA	-3.85565	-0.0468284	0.310586	0.583417
AC117944.1	0.306892	2.12419	0.805608	NA	-2.21374	0.599856	0.421271	0.883912
AC118549.1	-3.03258	-0.182504	0.052578	NA	-3.03539	-0.219897	3.25295	0.347341
AC118553.1	-0.0886345	-0.267731	-0.010672	NA	1.39003	-0.86245	-2.18546	-0.541377
AC118555.1	0.104027	1.40529	0.566708	NA	-1.04526	0.357268	0.455718	0.448671
AC119396.1	-0.091139	0.705317	-0.0787332	NA	-1.12006	-0.401427	1.57844	0.383201
AC119403.1	-0.946055	-0.168642	0.25837	NA	0.320568	0.00603391	0.659387	0.695316
AC119673.2	0.0218103	0.373379	3.61237	NA	0.361408	-0.0349723	1.20019	-0.0652654
AC119674.1	-0.489708	0.527171	0.702767	NA	-0.685335	-0.501709	-0.0698583	0.291081
AC119868.2	0.13176	1.51511	0.595388	NA	-2.78245	-0.218198	0.170732	0.810515
AC120053.1	0.305355	-0.987438	-0.513416	NA	0.194424	0.252809	0.0926827	0.230792
AC120193.1	-0.000172923	-0.142215	-0.0189451	NA	-1.83637	0.00533437	0.563931	-0.225888
AC121334.3	0.304798	0.392468	-0.00365586	NA	-1.06021	-0.79645	-0.256269	-0.0159098
AC121493.1	-0.241851	-0.397764	-0.00706248	NA	0.12923	0.0605825	-0.679089	-0.139003
AC121761.1	-0.244291	0.766132	0.668923	NA	-0.256113	-0.960741	-0.222321	0.390342
AC122129.1	-0.511474	1.33226	0.545803	NA	-0.615392	-0.707714	0.0650916	0.307933
AC123512.1	-0.534703	0.0117177	0.0852133	NA	0.792016	0.451473	-0.159904	-0.0270228
AC123567.2	0.109439	1.10842	0.658554	NA	0.248319	0.240511	0.155196	0.221376
AC123768.1	-0.180807	1.41327	1.15677	NA	-0.162916	0.475991	0.550629	0.0436073
AC123768.3	-0.240825	0.100059	0.709394	NA	-0.060059	-1.33563	0.500967	0.0641233
AC123768.5	-0.934	-0.200162	0.190034	NA	1.09913	0.0530755	-0.0538878	-0.207243
AC123912.1	-2.0864	0.3838	3.19555	NA	-0.545249	-0.0291783	0.14758	-0.617847
AC124016.1	0.256247	1.30354	1.07179	NA	5.18474	-0.660074	-3.46427	-0.151203
AC124016.2	0.638429	0.828904	0.233266	NA	2.57204	0.0543853	-0.795454	-0.0974622
AC124242.1	0.333686	0.198389	0.30489	NA	0.572294	-0.0358726	-0.184462	-0.172875
AC124254.2	0.23757	1.54655	-0.371243	NA	0.829758	1.34613	-0.723673	0.223565
AC124283.1	1.05828	4.95076	0.52254	NA	0.724688	0.232259	-0.279695	-0.0279809
AC124312.2	0.0208051	2.29511	0.606669	NA	-0.142586	1.64639	0.226239	0.239068
AC124312.5	-0.00650142	1.17224	0.501239	NA	-0.782475	0.140535	0.259082	0.138261
AC124798.1	0.29512	-0.0701204	0.031612	NA	-0.0803455	0.493829	0.194946	-0.192281
AC124852.1	-0.194722	1.01147	0.810664	NA	-0.815626	0.616663	0.48117	0.0640396
AC124854.1	-0.327159	0.764226	0.708439	NA	0.333418	0.341958	0.107822	0.11837
AC124944.3	0.444184	0.989152	0.459803	NA	-1.44315	-0.0346524	0.372542	0.228426
AC124947.1	-0.192358	-0.481616	-0.379905	NA	-1.15755	1.12783	1.07142	0.505446
AC125437.3	0.0840241	1.47942	0.310759	NA	-1.21761	0.828159	0.594509	0.336554
AC125494.1	0.4495	0.955238	0.154837	NA	-0.377426	-0.0107788	0.213801	0.16437
AC125603.2	-0.17426	-0.348936	-0.140116	NA	1.46569	0.206571	0.732087	0.592572
AC125613.1	-0.0203161	0.894325	0.248497	NA	-0.25744	0.121291	0.199228	1.35687
AC125616.1	-0.124989	0.165733	0.94212	NA	2.3766	0.736416	-0.262282	-0.00494962
AC125618.1	-0.1315	0.0273169	0.0361804	NA	-0.259502	-0.428658	0.195216	0.84227
AC125793.1	0.0239957	1.86616	0.724138	NA	-1.46636	0.110092	0.340384	0.0770058
AC126121.3	-0.717116	-0.0172292	0.623713	NA	0.127783	-0.0343793	0.422793	1.74381
AC126177.3	0.572264	0.216511	0.121393	NA	-0.172407	-0.147961	0.260931	-0.813105
AC126178.1	0.917486	-0.407674	-0.614822	NA	0.219168	-1.13285	-0.799608	0.295616
AC126773.3	0.199263	3.05564	0.491542	NA	-0.585149	-0.0139899	1.43133	0.032774
AC126773.6	-0.430761	0.246824	1.90673	NA	0.196209	0.363101	0.788539	-0.457175
AC127024.2	-4.78059	-1.81207	-0.212606	NA	-0.251138	0.514956	0.61296	0.909977
AC127024.4	-0.330911	0.487825	0.843821	NA	0.594245	0.0801528	0.461339	-0.0238012
AC127024.5	-0.173716	0.168682	-0.0644588	NA	-0.104941	-0.879754	0.529568	0.483473
AC127024.6	-0.393492	1.5466	0.170313	NA	-0.349963	-0.703167	0.260626	0.372782
AC127035.1	0.0510872	2.30669	0.960282	NA	-1.03423	0.48722	1.03295	0.760052
AC127070.2	-0.0132475	0.259849	0.493055	NA	0.147504	0.21218	0.00910706	2.23681
AC127164.1	-0.0106703	1.45022	0.446362	NA	-1.24456	-0.185601	0.385533	0.545249
AC127502.2	0.336006	-0.457109	-0.196464	NA	0.0822918	0.170408	0.397644	0.190507
AC127526.1	0.111821	2.09612	0.0975887	NA	-1.00905	1.13762	2.79838	0.9736
AC127526.2	-0.0270272	0.69175	-0.0711188	NA	-0.849325	2.40291	6.3666	0.61814
AC128687.3	-0.401235	2.28226	0.933146	NA	-2.03523	-0.345973	0.262757	-0.0378896
AC128707.1	-0.264733	0.772888	0.364956	NA	-0.568124	0.317592	0.291761	-1.03268
AC129102.1	1.69263	0.699523	0.112148	NA	0.270672	0.368496	-0.198736	-0.501569
AC129492.4	0.0630426	-0.861522	0.513303	NA	3.55438	0.132224	-0.075935	0.195823
AC129507.1	1.43692	-0.308729	-0.726974	NA	0.410246	0.380293	0.313242	0.738969
AC129803.1	0.070339	1.19294	0.419061	NA	-2.50771	-0.0144361	0.557931	1.04799
AC130324.2	-0.916026	0.501037	0.0501465	NA	-1.79217	0.719231	3.09827	0.0393334
AC130415.1	-0.906531	-0.0161017	-0.13087	NA	-0.440687	0.109671	0.470931	-0.80501
AC130650.1	0.0556299	1.68141	0.871158	NA	-1.6278	-0.551688	-0.100587	0.667837
AC130650.2	-0.471763	-1.1979	-0.145252	NA	-0.187135	0.341992	0.074259	-0.22408
AC131568.1	0.189552	1.44759	0.793634	NA	0.0220098	0.157353	0.87378	0.904632
AC131571.1	0.201228	1.46788	0.577473	NA	-2.69442	-0.0147104	0.459673	0.993419
AC131934.1	-0.0541597	1.59788	1.022	NA	-0.699902	0.0540138	0.758936	0.757278
AC131944.1	0.236454	0.495487	-0.190372	NA	-0.275856	0.128457	0.677523	0.189286
AC132153.1	-0.584004	0.903682	0.44252	NA	-1.1485	-0.365093	0.0272584	0.459886
AC132192.1	-0.00648966	1.68528	1.21139	NA	-0.94164	0.852131	0.0192467	0.110186
AC132192.2	0.178072	0.399356	0.388891	NA	0.930142	-1.06494	-3.65797	-0.458722
AC132219.1	0.384136	0.960294	-0.0235765	NA	-0.525328	0.209219	0.165412	0.331677
AC132803.1	-0.947983	0.042252	0.232256	NA	0.637744	0.120698	0.659687	-0.875557
AC132872.1	-0.106709	-0.461891	-0.425742	NA	1.46273	-0.292311	-1.24563	-0.225681
AC132872.2	-0.200272	-0.162764	-0.778478	NA	0.081758	-0.545404	0.908082	0.386973
AC132872.5	-0.0918976	-0.082331	0.0692989	NA	0.523381	-0.462412	0.064409	0.0335173
AC132938.1	-0.101319	1.68426	1.4271	NA	-1.34382	0.860552	1.69538	0.848241
AC133550.2	0.289061	0.88109	0.22325	NA	-1.39249	-0.0672616	-0.0183626	0.931858
AC133550.3	-0.0037555	1.44043	0.831363	NA	-0.270321	0.58821	0.924255	0.924303
AC133552.5	0.122522	-0.0688227	-0.540061	NA	0.183454	-0.655027	-0.790796	-0.0419375
AC133565.1	0.934372	2.09326	1.06959	NA	-1.70549	0.598058	0.849273	0.274699
AC134312.1	-0.106094	0.111392	0.534187	NA	1.5724	-0.123559	-0.0965439	-0.135254
AC134312.4	-0.27021	1.98279	2.23704	NA	-0.343854	1.48325	1.48544	-0.0959697
AC134312.5	-0.853165	-0.170298	-0.0589374	NA	-0.704602	-0.251763	0.00947223	0.228836
AC134772.1	0.574554	0.890852	0.035374	NA	-0.347252	-0.378929	-0.185317	0.00982915
AC135050.3	-0.83941	0.550943	1.03572	NA	-1.33115	-0.134897	0.575342	0.169576
AC135050.6	-0.0178947	2.74263	0.595522	NA	-0.277935	1.08875	0.534383	-0.189283
AC135178.4	-0.161863	0.793035	0.558608	NA	-0.272547	-0.887999	-0.189324	0.121008
AC135457.1	-0.19964	0.109612	0.256127	NA	0.162686	0.0986063	0.277278	0.974248
AC135782.1	0.021022	0.38314	0.230784	NA	0.580866	0.688942	0.549777	0.17787
AC135893.1	-0.0991612	1.17529	0.693609	NA	-0.808901	-0.0342709	0.741001	-0.144583
AC136475.1	0.971675	0.824685	0.223239	NA	0.807846	-0.550219	-0.383363	-0.201023
AC136604.2	0.115821	3.07082	0.521418	NA	-1.3026	0.853679	2.63557	0.737641
AC136604.3	-0.244332	0.933008	0.078826	NA	0.130874	-0.0808935	0.0845511	-0.188412
AC137630.1	0.677226	0.0614494	0.106109	NA	0.00476331	-0.165625	-0.0885454	-0.425146
AC137630.2	0.0284534	1.57378	1.21879	NA	0.391545	-0.0305015	0.725316	0.686912
AC137770.1	-0.717584	-0.396083	-0.170584	NA	-0.165984	0.0785527	0.468931	-0.10733
AC137810.1	-0.0590809	1.08875	0.979913	NA	-2.79581	-0.127838	1.03348	0.482018
AC137894.3	-0.855932	-0.676196	0.107304	NA	-1.12875	0.307698	2.06438	1.22066
AC137932.3	1.24474	0.459658	0.236003	NA	-0.176047	1.06772	0.467309	0.766798
AC138123.1	0.0859196	1.50836	0.392491	NA	-0.154075	1.00394	2.11655	0.0519108
AC138150.1	0.0569433	1.51219	0.105418	NA	1.30787	0.214255	0.694666	0.63065
AC138207.2	0.118506	1.13482	0.555819	NA	0.232363	0.00739816	-0.859423	1.89605
AC138305.1	-1.69721	-1.99374	-0.30015	NA	-0.733247	-0.237796	-0.949382	-0.417087
AC138360.1	0.0148471	0.92236	0.326715	NA	-0.3328	1.21287	0.564174	0.521111
AC138409.3	-1.38132	-0.14042	0.278217	NA	0.149311	-0.13533	-0.456074	-1.25019
AC138512.1	-1.60331	-1.2809	-0.103307	NA	-0.348689	-1.6102	0.144023	0.303984
AC138627.1	-0.228739	-0.944369	-0.384179	NA	-0.282602	-0.431917	1.89995	-0.0664544
AC138649.1	-1.11642	0.27439	0.534438	NA	3.04114	-1.1718	-2.41473	0.199632
AC138956.1	0.399246	1.85034	0.314727	NA	-0.0108922	-0.314264	0.184659	0.23025
AC138956.2	0.572643	1.28637	0.792256	NA	1.3774	0.0391892	0.37075	0.430583
AC138969.1	0.611208	0.829055	0.054629	NA	0.378632	-0.093481	0.660402	0.00589382
AC139100.1	0.293475	1.696	1.23414	NA	-0.256657	-1.4381	-0.406096	-0.0622921
AC139530.1	0.908039	0.625109	-0.0231026	NA	4.6716	0.123566	-0.568243	-0.725583
AC139720.1	0.0762223	1.27164	0.64978	NA	-3.29818	0.192687	0.512616	0.95097
AC139768.1	0.0415531	0.843748	-0.0433552	NA	-1.47868	-0.142374	0.0568127	0.151392
AC139769.2	0.0780569	1.90012	0.853834	NA	-0.0179302	-0.851402	-0.393076	0.066237
AC139795.2	-0.0256544	1.16968	0.229987	NA	0.00682513	0.0080023	0.0161444	0.300155
AC139795.3	-0.0507792	0.459998	1.15089	NA	-0.225306	0.309204	-0.355891	-0.242031
AC139887.2	-0.254225	-4.75942	-0.365151	NA	1.67711	0.745471	-0.199223	1.44439
AC139887.4	-0.385119	0.999683	0.740646	NA	0.537628	0.103978	1.21849	0.735863
AC140168.1	0.311628	-0.663733	-0.393916	NA	0.934396	0.434664	-0.1015	-0.0908309
AC140481.1	-0.257444	0.346109	0.305756	NA	0.0376722	0.0782821	0.14357	-0.407498
AC140725.1	0.551113	1.7047	0.316894	NA	0.801837	0.473558	-0.662962	-4.73881
AC140912.1	-0.0354303	1.78043	0.391247	NA	0.605533	-0.945807	-0.341828	-0.300226
AC142472.1	-0.0157223	0.233055	0.0327154	NA	-0.275772	0.842172	0.533728	0.696032
AC144652.1	-0.0106403	0.00901876	0.137398	NA	2.5226	-2.27888	-4.31605	-2.28932
AC145124.1	-0.0369992	-0.0258491	0.437423	NA	0.623597	-0.0112636	-0.284425	-0.425175
AC145207.1	-0.20771	0.279976	0.0730462	NA	-0.881657	-0.357598	0.792143	-0.109683
AC145285.2	0.179558	1.73561	0.395774	NA	-0.00302331	1.15593	0.660653	0.50418
AC145285.6	1.64668	0.251643	-0.207047	NA	-0.511792	-0.921491	-0.0528413	-0.257308
AC146944.4	-0.11438	1.08855	0.690999	NA	-0.362101	-0.973596	-0.642803	0.463803
AC148477.2	1.67759	0.570033	0.232561	NA	0.00591721	-1.65623	-0.404349	-0.245745
AC156455.1	-0.032378	0.155485	-0.16311	NA	-0.180813	-0.236317	0.842925	0.101573
AC159540.2	0.0479642	-0.643851	-0.196005	NA	-1.30882	0.036827	0.50587	0.412006
AC174065.1	-0.075152	0.117598	-0.283477	NA	-0.179673	-0.05797	-0.360845	-0.731146
AC211433.1	-0.000207756	1.52136	0.78369	NA	-2.38806	0.373009	1.25076	1.05768
AC211476.2	0.110719	0.883137	0.61431	NA	-0.342396	-0.217467	-0.334317	-0.353218
AC211476.6	-0.237063	-0.0815924	-0.430724	NA	-0.0971253	-0.516726	0.111951	0.179635
AC211486.5	-0.005761	1.86469	1.30429	NA	0.312783	0.122948	1.11451	1.07281
AC231533.1	-1.02446	0.438267	1.43314	NA	-0.596549	0.257181	1.68349	0.733029
AC231981.1	-0.0498266	0.757515	1.05896	NA	0.131464	0.36764	-0.904885	-1.68426
AC232271.2	-0.118968	2.20013	1.92398	NA	1.124	0.115758	-0.24485	-0.00414782
AC233266.2	0.476498	0.111537	0.204368	NA	1.77743	-0.251038	-1.04441	0.00522933
AC233280.1	0.911318	0.281802	0.139932	NA	3.31911	-0.96003	-9.14599	-0.27088
AC233296.1	-0.773188	-0.657734	-0.191495	NA	-1.95881	-0.0206404	2.98795	0.0487901
AC233701.1	-0.488548	-0.558462	-0.0595399	NA	-0.220134	-0.309672	0.214601	-0.154738
AC233702.7	-0.0471998	1.31052	0.786912	NA	0.0814008	0.664888	-0.158161	0.523026
AC233723.1	-0.657918	-0.247875	0.0600566	NA	-0.764765	-0.118715	0.0684299	-0.292125
AC233976.1	-2.73008	-0.207986	-0.192239	NA	-0.462695	-0.0370552	-0.126863	-0.038737
AC234582.1	-0.129469	1.89291	0.390004	NA	-1.5812	-0.158528	0.740585	0.28361
AC234917.3	0.520215	0.497345	0.25474	NA	0.335507	0.0586892	-0.499588	-0.195311
AC239799.2	0.211941	-0.0486926	-0.113399	NA	0.520499	0.108852	0.0570312	0.178876
AC239809.3	0.0230048	-4.6046	-0.229624	NA	-0.0123842	0.51066	-0.119072	-1.35343
AC239868.1	0.0639906	-0.489865	-0.308578	NA	1.85569	-0.143613	-1.60876	-0.237036
AC240274.1	-1.16261	-1.01072	-0.386377	NA	-1.00598	0.232701	0.499258	-0.119651
AC242426.2	-0.660486	-0.628599	0.300191	NA	0.145324	0.218833	-0.582859	-0.376236
AC242988.2	-2.08269	-0.183966	0.100698	NA	0.057679	-0.268118	1.08959	-0.0584741
AC243964.3	0.235393	2.46986	0.63561	NA	-1.29263	0.243614	1.27759	0.260151
AC244033.2	-0.0520882	-1.18108	-0.157509	NA	1.16211	-0.0633192	0.0134348	0.263885
AC244090.1	0.666807	0.0157343	-0.197721	NA	-0.456128	0.421014	-0.746265	0.167141
AC244131.2	-0.796946	-0.0530399	0.121358	NA	-1.85084	-0.292449	0.822644	-0.303168
AC244197.2	0.393551	1.77886	0.0101062	NA	-0.128279	0.10825	1.19666	0.164419
AC244213.1	0.228788	1.55624	-0.152221	NA	1.54714	0.0712883	-0.126062	5.10584
AC244453.3	0.461693	-2.62162	0.0505642	NA	3.64366	-0.764059	-4.07839	0.499848
AC244502.1	-0.149345	0.802103	0.00523225	NA	-1.35036	0.733387	2.74762	-0.12399
AC244517.11	-0.0436249	1.77775	0.646904	NA	-1.19582	0.717731	1.13714	1.66827
AC244517.2	0.138074	1.58512	0.27116	NA	-0.28797	-0.00504147	0.42153	0.402835
AC245033.2	0.135945	1.05932	0.521448	NA	0.652387	-0.0374697	0.386363	0.247547
AC245041.2	-0.455215	-0.754558	-1.23033	NA	-0.232732	0.196183	1.0977	-0.281946
AC245060.5	-0.144608	-2.63848	-1.69073	NA	-0.258751	-0.304655	-0.384202	0.186738
AC245060.6	0.0346535	1.78041	0.636706	NA	-0.29272	0.261489	0.0757829	0.228156
AC245100.1	-0.307102	-0.291712	0.105451	NA	0.3419	0.573488	0.730633	0.103172
AC245123.1	-0.336567	-0.309413	-0.486933	NA	-0.455962	-0.144731	0.542068	0.284001
AC245140.2	-0.767252	0.0902597	0.197531	NA	1.30486	-0.197788	-0.753749	0.00891024
AC245187.2	-0.232723	-1.58624	-0.807719	NA	-0.231519	0.331488	0.452135	0.268719
AC245297.2	-0.0501304	0.174854	0.182914	NA	-0.435139	0.377176	0.557886	0.378785
AC245297.3	0.137528	-1.93359	0.1004	NA	0.629454	-0.132391	0.7522	1.66362
AC245407.2	1.56547	1.96253	2.25945	NA	1.22681	0.0126354	-2.95355	0.395994
AC245452.1	0.331026	1.53261	0.103428	NA	-1.88187	0.282903	1.00455	0.992653
AC246785.3	0.169563	-0.0894534	0.123584	NA	0.232971	0.0806101	-1.07855	-0.341852
AC246817.1	-1.31855	-1.15549	-4.06449	NA	-0.0856066	0.149688	-0.284621	0.157885
AC246817.2	-1.12671	0.431694	-0.172449	NA	-2.0288	0.399631	-0.400413	-0.184412
AC254562.3	-0.0101316	-0.134304	0.0287659	NA	5.03951	0.376238	-0.971496	0.0769912
ACAA1	1.02228	2.01061	0.32715	NA	-0.701843	1.13356	0.243514	-0.334153
ACAA2	0.389546	-0.299566	-0.123586	NA	0.280411	-0.264745	-0.335015	-0.610044
ACACA	-1.69094	0.918839	1.8603	NA	-6.18522	-0.0270099	1.87111	-0.0293143
ACACB	-0.612521	-0.318764	-0.0847119	NA	1.09675	-0.275207	-0.249715	0.0983196
ACAD10	-2.29736	-1.0528	0.00953006	NA	-1.52429	0.163674	4.95373	0.287801
ACAD11	-0.198183	-1.79362	-0.143066	NA	-0.46185	-0.203696	1.25615	-0.288113
[truncated: 16,005 more rows]

## Sheet: BC age sign  -log10P
	X20	X30	X40	X50	X60	X70	X80	X90
A1BG	-0.969456	0.163441	1.46258	0.578559	-0.112353	0.0843759	-0.18441	-0.0741193
A1CF	0.226944	1.14496	0.1493	0.0333	-0.0717302	-0.0258085	0.222465	0.100566
A2M	0.07349	1.70725	0.350046	0.394437	-0.148761	0.0404522	0.0812694	0.261223
A2M.AS1	-0.486432	-0.295445	-0.382302	0.343721	0.365298	-0.341388	-0.418893	0.0773673
A2ML1	-0.585058	0.877599	0.274624	-0.210626	-0.276032	0.400402	1.10167	2.20848
A2ML1.AS1	0.0229652	1.91226	1.07729	1.40657	-0.409102	-0.0079618	0.867202	0.997005
AAAS	0.0281577	-0.554898	-0.619416	0.565112	-0.140367	1.10146	-0.915731	-0.244617
AACS	-0.225729	0.277438	0.588384	-0.178587	0.0520628	0.0721926	0.144282	0.0603252
AADAT	0.0496015	-0.161725	-1.01298	0.240867	0.132741	1.02056	0.443346	0.152623
AAGAB	-0.412601	-0.424916	0.126219	-1.25494	-0.248879	0.787548	4.57373	0.131369
AAK1	-1.19465	-0.466845	0.0601552	0.247765	1.2471	-0.730779	-1.23457	0.0228749
AAMDC	-0.132271	-0.464303	-0.238947	0.392039	-0.224322	-0.504189	0.122392	0.313378
AAMP	1.10258	1.0293	0.680537	-0.867204	-0.0218915	0.619045	-0.679989	-0.310013
AANAT	1.12167	1.59139	0.792692	-0.275275	-0.0105719	0.584864	-1.387	-0.827205
AAR2	-0.0191179	-1.91403	-0.445797	-0.426489	-0.405462	-0.0340761	-0.102155	0.861386
AARS	0.397117	-1.06944	-0.86894	-0.311256	0.789697	0.966362	-0.4302	-1.53761
AARS2	0.0974359	-0.65287	-0.460051	-1.73857	-0.143422	0.797333	0.372373	-1.08361
AARSD1	1.02193	0.51779	-0.150224	-1.28159	-1.01921	0.945184	2.71347	-0.155525
AASDH	-0.0161613	-0.641567	-0.206996	0.251807	-0.316364	0.943908	-0.0576548	-0.488313
AASDHPPT	-0.121366	-0.86048	-0.362013	-0.716087	0.792795	0.120878	-1.54671	-1.45567
AASS	-0.0343254	0.173065	0.047785	0.0349446	0.0238158	-0.425748	1.5684	0.184081
AATF	-0.197248	-0.725569	0.230327	-0.815359	-0.824757	0.52929	1.02054	-0.25284
AATK	-0.320455	-0.012106	1.33062	-0.676591	0.154463	1.21563	1.32004	1.42147
ABAT	-0.657103	0.279935	0.735963	-0.129474	0.360959	0.262283	1.22914	-0.00533079
ABCA1	-0.181113	0.069576	-0.421683	-0.761998	-0.415	-0.430446	0.0475489	4.77171
ABCA10	-0.0826041	0.388171	0.129563	-0.188834	-0.964663	0.686179	2.82052	0.207056
ABCA12	-0.32888	0.298959	0.172844	-0.10941	-0.0726443	-0.210673	0.234346	-0.259357
ABCA2	0.321557	-0.202595	-0.527581	0.600846	-1.8794	0.0563831	1.15027	0.0901225
ABCA3	-0.0410306	0.413523	0.140436	-1.65424	-1.4165	0.458642	1.30822	1.2055
ABCA4	-1.90261	-2.08664	-0.796628	-0.543794	-0.139179	-0.921887	-0.106721	-0.124215
ABCA5	-0.105583	-1.33866	-1.9981	0.608813	0.842966	-1.02351	0.0235148	-0.551914
ABCA6	-0.306915	-0.0512286	0.0292499	0.0998489	-1.78687	0.87751	3.81094	0.0717428
ABCA7	-0.0223263	-0.17324	-0.410723	-0.789948	-0.505054	-0.258814	2.02715	0.394879
ABCA8	0.511063	-0.713698	-0.807177	-1.22501	-0.10902	0.189188	0.0149863	0.184459
ABCA9	-0.261803	-0.829543	-0.180767	-0.0348021	-1.34404	1.46984	3.10032	0.293366
ABCA9.AS1	-0.0667295	0.960517	0.763101	-0.101033	-2.05981	1.04589	3.16156	0.286457
ABCB1	-1.00025	-1.02205	-0.849558	0.0861481	0.0886956	-0.0152097	-0.129003	0.0653686
ABCB10	-0.527267	0.835201	0.477543	0.565494	-0.171226	-0.680433	-0.0301292	0.0182415
ABCB6	0.893706	-0.0117154	-0.487378	-0.238633	0.179699	2.06714	0.307312	-0.927911
ABCB7	-0.868768	0.901621	0.664724	0.99361	-0.301163	-1.24279	0.136136	-0.565245
ABCB8	0.140542	2.26421	0.845107	1.24941	0.00185762	0.29382	-0.0176326	-0.0432738
ABCB9	-0.256336	0.696849	0.0763598	-1.36149	0.343735	0.495695	1.06457	0.400211
ABCC1	-0.199591	-0.43555	-0.118695	0.180694	0.0972688	0.172063	0.586337	0.288055
ABCC10	0.146023	0.2811	0.0607044	0.158055	-0.115604	1.21865	0.22496	0.287597
ABCC11	0.205376	0.492014	0.285268	-1.91556	0.997489	1.1378	0.281712	0.500117
ABCC2	-0.0989777	-0.27425	0.296554	0.136417	0.11308	0.374328	0.170915	-0.139218
ABCC3	-0.0227454	-1.44914	-0.751041	0.0760965	0.212052	0.342981	0.967933	0.422794
ABCC4	0.0739342	-0.711186	-0.3672	1.58918	-0.00996227	0.753495	-0.0519751	1.25692
ABCC5	0.020015	-2.18476	-0.525664	0.539273	-0.0720853	0.734698	0.0964254	-0.177105
ABCC5.AS1	0.242645	1.01968	1.21417	-0.399877	-1.12634	-0.203919	-0.127149	0.502105
ABCC6	-0.305593	0.309655	0.134756	0.143831	-0.945508	-0.838832	0.812913	0.499687
ABCC8	-1.39165	0.0696812	0.422311	0.304685	0.646127	0.401972	0.412957	0.841892
ABCD1	-0.265186	0.134266	-0.271945	1.48454	0.0729555	0.0677963	0.529905	1.26123
ABCD2	-1.21514	-0.473235	-0.193826	0.281169	-0.283271	-0.557102	0.0316749	-0.71532
ABCD3	-0.344326	0.530139	0.793381	0.855754	0.207476	0.0719411	0.0951105	-0.696158
ABCD4	-0.147828	0.0645538	-0.303252	1.01313	0.527792	-0.0733643	-0.0332989	-0.862426
ABCE1	0.0278565	-2.03597	-1.15193	0.291157	0.186181	0.258959	-0.68912	-0.657634
ABCF1	0.448599	-0.220816	-0.609111	-1.44918	-1.28091	1.67152	0.0382184	-1.3621
ABCF2	0.764299	0.711548	0.289581	-1.44035	-0.344148	1.99863	-0.222212	-0.276501
ABCF3	0.133828	0.00397408	-0.0411896	-1.29867	-0.221633	2.35575	0.0858228	-0.187857
ABCG1	-0.125315	0.630111	0.847003	-1.24906	0.182807	0.0407778	-0.0170931	1.64469
ABCG4	-0.0421835	1.6345	0.22457	-0.739563	0.522495	-0.864751	-0.397092	0.0273195
ABCG5	0.362751	1.01116	0.227981	-0.0898033	-0.732942	0.726394	2.36083	0.584462
ABHD1	0.26126	1.97602	0.634634	-0.245363	-1.06927	1.23445	1.33659	0.415628
ABHD10	0.265389	-0.168908	-0.248735	-0.393639	0.155322	0.323317	-1.3594	-0.665112
ABHD11	0.568433	0.150835	-0.0833697	-0.896843	-0.0982463	1.04876	-0.0437878	-0.634748
ABHD12	-0.602814	0.363946	0.199069	-0.233893	0.0851704	0.219762	-0.556391	-0.129887
ABHD12B	-0.345144	0.832675	0.147171	0.110765	-0.172064	1.83963	0.348276	0.658576
ABHD13	0.233808	0.0782393	0.259695	-0.0395834	-0.0756366	0.387643	-1.21475	-1.2865
ABHD14A	0.259958	1.75036	0.931438	-1.19314	0.0395388	0.416905	-0.20946	-0.119991
ABHD14B	0.180201	1.35319	1.21469	0.94302	0.837631	-0.456158	-0.392784	0.301181
ABHD15.AS1	-0.0177352	1.42596	0.858201	1.12743	0.707531	-0.102663	-0.141105	1.00591
ABHD16A	0.575229	1.54871	0.730362	-2.20649	-0.19164	3.32057	-0.181334	0.0673184
ABHD17A	1.38193	0.365095	0.127633	0.0902222	0.0180916	0.288839	-0.718995	0.0496589
ABHD17B	0.0491792	0.454282	0.378131	-0.171747	1.11879	-0.450128	-1.99795	-1.27932
ABHD17C	-0.563177	0.131216	0.172392	-0.698795	-1.02244	-0.708571	-0.0129622	0.729289
ABHD18	-0.885108	-0.471707	-0.887111	0.990317	-0.790647	-0.348342	1.17088	-0.322818
ABHD2	-0.75005	0.17164	0.0162241	0.291422	0.0754585	0.105243	0.169946	0.291082
ABHD3	-0.00350929	-1.17322	-0.129198	0.838825	0.568174	-0.371344	-2.01349	-1.46528
ABHD4	2.36135	-0.0084283	-0.337661	-0.25514	0.167215	0.926998	0.0487365	0.0232763
ABHD5	0.21224	0.869021	1.10691	-0.337603	-0.988974	0.0269445	-0.101607	-0.284316
ABHD6	-0.148663	1.03769	0.600588	-0.240135	0.36012	-0.0920374	0.0132206	0.0803569
ABHD8	0.493713	2.92734	3.93379	-0.67852	0.418915	0.469264	-0.654213	-0.131887
ABI1	-0.429827	0.364206	0.493247	0.235278	-0.887126	0.872056	0.615683	-0.164997
ABI2	-0.458919	0.298222	0.967069	-0.172828	0.210112	-0.585437	0.546221	-0.547856
ABI3BP	1.7148	0.835121	-0.399151	0.728259	-0.211582	0.582687	1.653	-0.218695
ABITRAM	0.704627	0.203632	-0.131463	0.723429	-0.415086	0.367886	1.35581	-0.0070015
ABL1	-0.622521	0.941923	1.35689	-0.262486	-1.16246	0.16096	1.72891	0.440219
ABL2	-0.847042	-0.344304	-0.105863	0.0644368	-1.18221	-0.069383	2.92925	0.221801
ABLIM1	-0.450917	-0.400707	-0.163481	0.131335	0.0910783	-0.22724	-0.127867	-0.250838
ABLIM2	-0.682851	-0.801048	-0.200086	0.0723228	0.315034	-0.105306	-0.015222	-0.0580776
ABLIM3	-0.492896	-0.0318794	-0.368656	0.0624088	-0.0343253	0.302368	0.205707	-0.752932
ABR	-1.04397	-0.970121	-0.232148	-0.358233	1.04497	-0.651503	-0.0343736	1.09137
ABRAXAS1	-0.0274925	0.296291	0.144567	-0.292393	-0.340043	-0.444864	-0.827664	-0.77727
ABRAXAS2	-0.0426996	-0.763687	-0.673936	-1.44639	-2.17659	0.0118584	0.143219	-0.81007
ABT1	-0.06614	0.782273	0.900944	-1.02327	-0.0474892	1.71692	-0.0829569	0.125237
ABTB1	-0.038408	0.0282737	0.424016	-0.362163	-0.797861	-1.17509	-2.05478	-0.316799
ABTB2	0.380678	-0.522619	-0.472124	0.0229081	0.515618	0.10436	-0.164911	-0.0298558
AC000068.1	0.152822	0.621468	0.585086	-0.474917	0.507104	-1.18006	-2.34011	-0.766224
AC000124.1	-0.336043	-0.0562979	-0.521028	1.17669	-0.488695	1.77923	0.871215	-0.641646
AC002069.2	-0.505196	-0.625045	-0.0904517	-0.268972	-0.218114	0.0028007	1.34545	-0.0241167
AC002070.1	0.283767	0.202479	-0.558031	-0.206617	0.600429	0.271986	0.341827	-0.616413
AC002094.4	0.658547	0.125722	-0.340783	1.0352	-0.52165	-0.24693	0.0962411	-0.136488
AC002116.2	0.171476	1.46343	0.373993	0.723949	0.131062	-1.60638	0.210754	1.17437
AC002310.1	0.31066	-0.413251	-0.460696	2.69081	0.0767859	-0.0300725	-0.465282	-0.381213
AC002310.2	0.178511	1.53311	1.51258	0.523448	-0.45838	-0.01569	-0.224091	0.61642
AC002383.1	-0.479284	-0.39533	-0.768269	1.08751	-0.505526	-2.02582	1.00075	0.0292151
AC002401.1	-0.124014	0.0821693	0.0900279	1.30904	0.21471	-0.362023	0.228551	0.489904
AC002429.2	-0.0361588	1.1929	0.849099	0.526221	-0.631281	0.186529	0.397281	1.47634
AC002460.2	-0.0537035	-0.493786	-1.43655	0.709638	0.467761	-3.06286	-0.267838	-1.08912
AC002463.1	0.0406293	1.5681	0.852118	0.500418	-0.830303	0.16731	0.825683	0.273078
AC002467.1	0.213286	-0.748139	0.228164	0.865863	0.470012	-0.192127	-1.39378	0.0624514
AC002470.1	0.106599	0.27601	0.137726	0.0125518	0.580822	0.0540834	-1.43796	-0.815701
AC002546.1	-0.0523581	0.682841	0.368208	0.413364	0.400966	1.14267	0.270881	0.445479
AC002553.1	0.0860557	-1.25722	-0.789711	0.00707219	-0.679738	-0.360088	0.109489	-0.267345
AC002553.2	-0.0997775	0.607684	0.126493	2.15017	0.496869	0.673401	0.676227	0.102206
AC002558.2	-0.0800035	0.891003	0.457793	-0.142802	-0.816904	-0.410537	-0.142634	-0.189927
AC002558.3	-0.34358	0.406047	1.15068	-1.82999	-0.10213	-1.7337	-0.0151493	-0.0639021
AC003005.2	-0.0390545	-0.379669	1.6636	-0.501382	-0.150579	1.32447	0.143896	0.0564608
AC003102.1	-0.221197	1.69991	0.698012	-1.0676	-1.23848	-0.350546	1.01589	-0.104962
AC003666.1	-0.431102	-0.24318	-0.159441	0.187767	0.137123	-1.38283	0.161456	0.0145186
AC003681.1	0.092461	1.47804	0.724159	0.454504	-0.464758	0.166604	0.598568	1.41029
AC003682.1	-0.369572	0.302436	0.35639	0.2331	-0.163732	0.0609706	1.18218	0.132502
AC003991.1	-1.12336	0.234412	2.72501	-0.902774	-0.488885	-0.137381	0.557908	0.0753031
AC004034.1	-0.16308	0.870959	0.520437	-0.0637933	0.575351	0.0657042	0.678679	0.985591
AC004039.1	-0.0525208	0.990024	0.729244	1.50518	-0.744575	-0.101201	0.318846	0.308182
AC004053.1	-0.209142	0.8906	0.00271667	0.173962	-0.354725	0.0298528	0.575695	0.671743
AC004054.1	-0.0530852	0.947264	0.506486	1.6026	0.0359395	0.743932	0.0576171	0.532261
AC004069.1	0.133386	-3.00544	-0.976957	-0.0180143	0.0895066	0.841497	0.371012	-0.153375
AC004076.2	0.46359	3.99523	0.568662	-0.222372	1.5467	-0.500547	0.324157	0.481129
AC004083.1	-0.586961	-1.03888	0.104342	0.0372656	1.74059	0.0933424	-1.28143	-0.117186
AC004112.1	0.145737	2.19626	0.95723	-0.657872	-1.50952	0.352885	1.84018	1.52027
AC004130.2	-0.0472084	0.53271	0.0694266	0.313277	0.048417	-0.217369	0.319985	0.494516
AC004147.2	-0.33298	-0.0711259	-0.0395766	0.401066	-0.382039	-0.13039	-0.23586	-0.178566
AC004147.5	-0.468465	0.178088	0.00671503	-0.349815	-0.776802	-0.00921371	0.0132032	-0.515252
AC004148.1	0.258593	0.0625579	-0.150855	0.173087	-0.645319	0.239827	-0.657162	-1.03399
AC004158.1	-0.301146	0.366794	-0.141931	-4.33823	-0.0374472	0.242355	0.577048	0.14029
AC004160.1	0.0191474	0.984824	0.604227	0.44228	0.115754	0.430707	0.772111	1.15427
AC004233.1	0.0194009	0.165017	0.40879	0.317649	0.347552	0.484513	-0.970086	-0.592702
AC004233.2	-0.752965	-0.361489	-0.175745	0.0446843	0.0556453	0.334262	0.151832	-0.242969
AC004241.1	-0.435414	0.624717	2.45118	0.103189	-0.535462	2.49036	0.382925	-0.579436
AC004253.1	0.0523814	1.21726	0.912219	0.0788126	-0.682495	0.477479	1.19888	1.33085
AC004448.2	1.34758	0.383103	0.434183	1.06161	-0.0397621	-0.972274	-2.75506	0.0184868
AC004466.1	0.281507	-0.0300809	-0.180663	0.378317	-0.390449	-0.594203	0.00633432	-0.0561963
AC004470.1	0.0477032	0.514741	-0.0673439	-1.95309	0.196245	0.359328	1.01088	-0.598857
AC004477.1	0.105829	-0.737697	0.115009	0.480827	1.29858	0.0973043	-2.1666	-0.969913
AC004522.3	-0.187565	0.0314935	-0.1172	0.448753	0.507603	-0.00551084	0.0678409	0.595889
AC004540.1	-1.94796	-0.251943	0.186083	-0.0204909	0.197453	-0.967081	0.00221498	0.359183
AC004540.2	0.0373813	0.426148	0.331655	-0.0233298	0.469521	-0.397423	-0.215381	0.274272
AC004594.1	0.119003	1.06325	0.26155	-0.036653	-0.216639	0.090155	3.3147	1.17014
AC004596.1	0.0324485	0.896098	0.519487	-1.86933	0.0819346	1.88947	0.949595	0.520751
AC004672.1	0.0612793	0.341707	-0.0621058	0.198499	-0.177291	-0.0835912	-0.319538	0.0913995
AC004692.2	-0.0971361	1.10856	0.501759	1.05766	-0.15198	0.325553	0.319592	0.507169
AC004771.4	0.0433941	-0.647943	-0.506356	0.407419	-0.19994	0.321848	-0.400769	0.21459
AC004784.1	-0.612581	-0.33607	0.0081558	-0.777447	0.421353	0.168774	-0.13494	0.0546014
AC004797.1	0.104846	1.70376	1.20943	-0.238555	0.0595853	0.668263	0.08009	0.121876
AC004803.1	-0.154381	-2.91455	-0.772124	1.31868	0.493585	-0.528965	-1.19995	-0.0267446
AC004812.2	0.278221	0.137553	0.0869559	0.66107	0.444349	0.27686	-1.75984	-1.79527
AC004816.1	0.0645446	-0.476768	-0.567126	-1.07273	0.170329	0.0982608	-0.144682	-0.34237
AC004825.3	-0.0421411	0.935856	0.577066	1.22892	-0.256102	-0.424575	0.350541	0.334793
AC004834.1	0.000436963	-0.707449	-0.264375	-0.087331	-0.455471	-0.383626	0.757857	-1.39533
AC004835.1	-0.00341741	0.802352	0.544737	-1.18965	-0.0705368	-0.781589	-0.509565	1.23527
AC004837.4	0.558515	1.20668	0.873664	-0.793623	-1.27748	-0.813423	-0.879612	-0.299421
AC004839.2	0.228109	0.793333	0.302122	2.36279	0.399057	0.643308	0.0471849	-0.395555
AC004846.2	0.547087	0.494603	0.0983384	0.278988	-0.0185286	0.180396	0.29508	0.237557
AC004852.2	-4.52666	0.316597	2.02944	-0.488651	-0.478054	0.109508	0.991295	0.155055
AC004865.2	-0.00924867	-0.373092	-0.065308	1.17083	-0.0385098	0.08959	0.00426944	3.70872
AC004884.2	0.194873	1.67309	0.233285	0.646138	-0.988557	-0.282567	0.0684359	0.0821498
AC004908.2	0.326357	-0.0720241	0.766353	-0.0446002	0.644529	2.16445	-0.00316753	-0.153059
AC004918.1	-0.45392	1.16338	0.710773	0.239088	-0.0476708	-0.734665	-0.455176	0.101573
AC004930.1	-0.551898	-0.466636	-0.374606	-0.432246	0.156192	0.120116	-0.242464	-0.198569
AC004943.2	-0.995857	-0.158393	0.0873024	-0.194845	-0.463731	-0.399367	0.218253	0.706349
AC004947.1	0.119325	-1.70278	-0.490225	0.125819	-0.162322	-0.0541595	0.864166	0.0812309
AC004949.1	0.501721	-0.872746	-0.514489	0.288844	-0.062919	0.028611	0.363259	-0.852153
AC004951.1	-0.240398	-0.887159	-0.425971	-0.655803	-0.648254	0.0162315	1.03965	0.993897
AC004969.1	-0.0845592	0.869256	0.529842	2.54232	-0.0576375	-0.0187768	-0.248644	0.277034
AC004974.1	-0.0137813	0.0797024	-0.180202	-0.662177	0.0678358	0.779254	0.415652	1.04644
AC004982.1	-0.125414	-1.40732	-1.25685	0.421263	0.061773	-0.414812	0.279881	-0.103525
AC004982.2	-0.366941	0.60392	0.171465	2.24237	-0.0516635	-0.826126	-0.120632	0.175612
AC004988.1	0.362287	1.16326	0.247077	1.22911	-0.197968	-0.0432829	-0.232774	0.267652
AC005009.2	-1.16914	-0.741042	-0.218617	0.836832	-0.286471	0.310591	1.36479	0.260548
AC005014.4	0.157934	1.12996	0.516656	1.08576	0.289763	0.303075	0.00161754	0.135439
AC005034.6	0.178003	0.254125	0.00638908	1.50634	0.232406	-0.0314703	-0.13124	-0.0251226
AC005037.1	0.0981032	1.60137	0.695772	-0.604224	-0.175283	0.407923	1.84156	1.056
AC005040.2	-0.380096	-0.779764	0.302342	2.31192	-0.22041	-4.16193	-2.88535	0.301755
AC005041.4	0.524941	1.77242	0.39635	-0.118596	-0.0452776	0.485855	0.173029	0.113286
AC005041.5	0.536258	1.44761	0.908438	-0.0274872	-1.25008	0.264547	0.279837	0.938673
AC005046.1	-0.0162174	-0.349016	-0.221964	1.62617	0.120255	-0.368921	0.117143	-0.00668064
AC005052.2	0.540361	0.555045	0.273766	0.0411649	-0.0996619	0.903513	0.89074	0.703758
AC005062.1	0.585521	1.38901	0.119315	-0.339578	-0.233715	-2.491	-1.14201	1.37953
AC005064.1	0.231084	1.5242	0.600453	0.348141	0.0123685	-0.00849878	0.571022	0.575321
AC005070.3	0.00514663	1.31893	1.28381	3.63893	0.023164	-1.01349	-0.0519657	1.12121
AC005072.1	-0.456804	0.0700956	0.106779	-2.54272	0.193045	2.42368	1.64341	0.37517
AC005076.1	0.915289	0.780162	0.0579638	0.11197	0.224417	1.11671	0.0456807	0.21746
AC005081.1	-1.1455	-0.134985	0.0044391	0.192314	-0.168799	-0.893867	-1.34929	0.206414
AC005091.1	-0.195968	0.685671	0.587511	1.15579	0.503127	-0.5451	-0.170552	-0.489932
AC005154.4	0.30125	1.29981	0.16013	0.240564	-0.628529	0.153281	0.448547	0.210163
AC005165.1	0.631147	0.0419651	0.140453	-0.00109126	-0.364596	-0.191143	-0.0481753	0.412643
AC005208.1	-0.269605	1.35687	2.09426	-0.198865	-0.191579	0.908922	1.29961	0.305721
AC005224.2	-0.0255104	0.0132386	-0.0315264	-0.426065	-3.35298	-0.642695	-0.345146	0.29867
AC005225.2	0.192275	-0.142394	0.172491	-0.0758419	-0.0776189	1.1869	0.832095	1.21384
AC005225.3	-0.223631	-0.74253	-0.538278	0.123223	-0.263562	-0.126117	-0.103498	0.233121
AC005229.4	0.247341	-0.291534	-1.13896	0.372281	0.125766	0.0854376	-0.243802	-0.361533
AC005237.1	0.237214	0.501861	-0.443342	-0.253022	-0.365286	-0.677888	0.468445	-0.833118
AC005253.1	3.58759	1.53801	0.517096	0.21593	-0.0752211	0.812644	0.287986	0.0260677
AC005261.1	0.196012	0.0345055	0.0469012	0.17754	-0.434318	-0.0449614	-0.0118166	0.0876453
AC005261.2	2.29849	0.023138	-2.92925	1.05312	-0.560613	-0.00435942	-0.119613	-0.594706
AC005288.1	1.79844	0.685413	-0.0149398	-0.463978	-0.129991	-1.32035	0.0042697	0.0828314
AC005291.2	-0.316354	0.631426	0.16496	3.33624	0.122697	0.257536	0.456349	0.810623
AC005306.1	0.170829	-0.43052	-0.423802	2.10511	0.0794639	0.205926	0.065053	0.197098
AC005329.1	-0.0617233	-0.704158	-0.367956	1.68472	0.174883	0.440395	-0.170731	0.748952
AC005332.2	0.0349231	0.566571	0.0344076	0.73843	0.32051	-0.696808	0.20603	-0.0978316
AC005332.3	0.580395	-0.281876	-0.0412846	0.378094	0.459956	-0.300403	-1.39315	-1.54433
AC005332.4	0.913308	0.241057	0.120331	1.05086	1.23105	1.53465	-0.301485	-1.14092
AC005332.5	-0.0397182	-0.431905	-0.0224908	0.226282	-0.00303146	-0.0146074	-0.619587	-0.0133573
AC005332.6	0.00953015	-1.47882	-2.16904	0.172168	0.049629	-0.0614513	0.208695	0.249339
AC005332.7	0.116918	-0.518526	-1.33634	0.294681	0.0777944	-2.25733	0.248895	-0.331096
AC005355.1	-0.588653	-0.433348	-0.254455	0.0173383	-0.116715	0.445502	0.232315	-0.0687689
AC005363.2	0.725521	-0.259224	-0.074685	0.174601	0.45171	0.732525	-0.349264	0.0486069
AC005387.2	-0.0954434	0.773777	0.146688	-0.341144	-0.429202	-0.10777	-0.0163495	0.620616
AC005392.3	-0.597038	0.673025	1.70377	-0.872623	0.11982	1.40296	2.21021	-0.438132
AC005393.1	0.0482351	-0.758924	-0.00427107	-0.0105874	-0.171399	0.812845	-0.0436648	0.0167735
AC005394.1	-0.336641	1.0752	0.296281	0.854254	-1.00888	0.0265535	2.08816	0.0697057
AC005400.1	-0.0616453	-0.0872811	0.0636568	1.78763	0.231723	0.489732	0.511411	0.0638706
AC005410.2	-0.515944	0.266279	0.472361	0.927339	0.33218	0.574856	0.578141	0.632689
AC005476.2	-0.260124	-0.230615	-0.0470995	0.65497	-0.045149	-1.96685	-0.128967	-0.325043
AC005480.1	0.0593195	1.02541	0.697675	0.471202	-1.49944	-0.548876	-0.0185315	0.920593
AC005487.1	0.1827	1.66153	0.762186	-0.145487	-0.783018	-0.830699	-1.92538	0.353695
AC005498.2	0.55204	-0.332311	-0.0202139	-5.32122e-05	-0.120872	0.836916	-0.386107	-0.791157
AC005498.3	-0.00375491	-0.405749	-0.191568	1.23236	-0.0144898	-0.222794	-0.722479	-1.34878
AC005520.2	-0.687731	0.16672	0.982234	0.256543	0.414827	-1.5408	-1.08334	-0.900817
AC005520.5	0.455361	0.799428	1.67814	0.057293	0.976046	-0.111445	0.0690645	0.411045
AC005523.2	0.596891	1.07387	0.363485	1.22955	-0.188901	-0.294124	-0.283668	0.0570175
AC005532.1	0.219983	-0.339	0.436139	-0.0260271	0.593454	0.826601	0.410831	0.141731
AC005534.1	-0.0980609	0.578653	0.519522	-0.594842	-0.231551	-0.0228533	0.467125	0.197362
AC005537.1	-0.437074	-2.31142	0.0886173	0.570924	0.121599	-0.476087	0.151011	0.087388
AC005550.2	-0.843877	-0.00856152	-0.416401	0.101351	-0.925499	0.115843	0.116697	-2.83086
AC005562.1	-0.149941	-1.09673	0.0886641	-0.210638	0.435676	0.157771	0.128658	-0.748401
AC005592.1	-0.184179	0.737146	0.780827	-0.108986	0.000840791	0.837615	0.134464	-0.761206
AC005597.1	0.0230675	0.81083	1.25784	-0.0240637	0.225911	0.197542	-0.15418	0.393923
AC005609.1	-0.0665171	0.930899	0.760296	1.08084	-1.18031	0.271038	0.0270427	0.159554
AC005609.5	-0.291517	-0.409682	-0.05986	0.236041	-0.611388	-1.16713	-0.438444	0.0434729
AC005618.1	0.189386	-0.00251497	0.929489	-0.79658	-0.0377437	0.0376255	-0.411208	0.262379
AC005618.4	2.19603	-0.0735638	0.0500551	0.261076	0.311098	0.917145	0.134978	0.0557206
AC005632.3	-0.119801	0.496755	0.743379	1.16539	0.139477	-0.203936	0.383298	0.133963
AC005670.1	-0.626941	-1.39575	-0.65301	0.0321377	-0.211347	-0.0314993	-0.0116918	-0.611935
AC005670.3	-0.694431	-0.463759	-0.131067	0.470858	-0.144985	-0.755962	0.726482	0.55228
AC005674.2	0.458971	0.269452	0.0613263	2.63786	0.0123564	-0.0850549	-0.717554	-0.00613186
AC005682.2	-0.627132	-0.0194328	0.0175564	-0.560614	-1.36962	-0.513108	0.444176	1.04615
AC005692.3	-0.0401024	0.925117	0.876372	-0.755708	-0.37824	0.193055	0.299378	0.827924
AC005695.2	0.016065	1.43968	1.39258	-0.276464	-0.735473	1.041	1.41606	2.13322
AC005696.1	-0.109279	1.22895	2.47503	-0.570577	0.685976	1.77612	-0.497845	0.117698
AC005696.4	0.273163	-0.102331	-0.528983	4.59648	0.218667	-2.4093	-0.712542	-0.517883
AC005697.2	0.0628238	1.57239	0.898112	0.0454261	0.115169	0.7329	1.27729	1.2124
AC005703.4	0.206529	0.283701	-0.146968	0.922778	-0.475212	0.700471	2.03097	-0.400803
AC005726.1	-2.59033	0.100818	1.02534	0.371234	1.59391	-0.399255	-0.705957	-0.264863
AC005726.3	-0.225299	1.34282	1.64021	0.167399	0.18418	-0.13999	0.0535378	-1.46797
AC005726.5	-0.0259238	1.37418	1.37474	0.308476	-0.693774	0.0395465	0.145882	0.846778
AC005740.3	0.569848	3.57345	2.61825	-0.339726	-1.02769	-0.686814	-0.108705	0.110001
AC005740.5	-1.6262	0.347523	1.44972	-0.312221	-0.122893	-0.0149473	1.61533	1.96326
AC005746.2	-0.21757	1.84253	1.11759	-0.263196	-0.665315	0.134414	0.529297	0.0939275
AC005753.2	-0.0521239	1.66619	0.117978	-0.142688	0.161178	-1.9733	0.695742	-0.098743
AC005753.3	-0.0342131	0.604523	0.156252	-0.388401	-0.0495383	-0.184936	0.246925	-0.139514
AC005759.1	0.19422	-0.545756	0.0657763	-0.479349	0.180012	0.454221	0.239839	-0.0212047
AC005775.1	0.140235	1.27307	1.02547	0.458513	0.0777538	-1.69022	-0.920707	0.220139
AC005786.3	-0.24169	-0.890068	-1.26115	6.67383	-0.0695897	0.236876	0.89385	0.148404
AC005828.1	-0.0543625	0.671228	0.555473	-0.0924553	-0.00350999	0.578132	0.375251	0.571265
AC005828.3	0.132068	0.66406	0.754404	-0.141073	-0.0332212	1.00011	0.853528	2.38229
AC005837.1	0.425825	0.00223691	0.00890893	-0.772271	0.1235	0.391603	-0.476666	0.122269
AC005838.2	-0.484488	-0.713373	-0.482253	-0.464404	-0.629333	-0.253726	0.793204	-0.200494
AC005856.1	0.00886755	1.06982	0.887429	0.11224	-0.0541928	-0.77733	-0.0785572	0.0733438
AC005863.1	-0.323998	-0.28639	-1.35632	0.641088	-1.23711	0.0496509	-0.135183	-2.53795
AC005865.2	-0.148696	-1.47417	-0.394938	0.137392	0.418407	-1.60716	0.58655	0.0181026
AC005884.1	-0.180909	1.01077	1.11437	0.73658	0.0899011	-0.349712	-0.158906	-0.090607
AC005899.1	-0.518763	0.144506	0.0180738	-0.187698	0.225321	0.391397	1.5405	0.599155
AC005899.5	-0.787286	-0.0651735	0.0836785	-0.0279198	-0.159339	-0.124063	2.20661	0.231432
AC005899.6	-0.391517	0.972037	0.548454	0.0635521	0.0916552	0.451991	0.757782	0.608606
AC005899.7	-0.57068	0.0559996	-0.112136	1.45086	0.0599378	-0.72795	0.58934	0.106166
AC005899.8	-0.0798055	1.85434	1.4755	-0.211059	0.253266	0.133173	2.13018	0.707258
AC005906.2	-0.0299823	1.58833	0.700781	-0.0944224	-0.11868	-0.472661	0.859581	0.000341945
AC005908.3	0.302712	-0.158856	-0.100435	0.223904	-0.231592	-0.681414	0.232631	-0.418481
AC005909.2	-3.09922	-0.298902	-0.140312	0.107516	-0.120283	0.161401	0.0391709	-0.128583
AC005920.1	-0.129498	-0.892292	-0.157332	0.0276424	0.0761446	0.378779	0.820869	-0.110084
AC005920.2	-0.0333535	1.03995	0.911427	0.583251	-0.0207983	0.113755	0.223133	0.543916
AC005921.2	0.0392506	1.47418	1.43466	-0.280257	-0.126782	0.834937	0.00567682	0.262496
AC006001.2	-0.713946	-0.85092	-1.25302	0.320637	-1.0484	1.29028	2.81195	-0.0134409
AC006004.1	0.049379	1.16287	0.306567	-0.195474	-0.28285	-0.792553	-0.3446	0.541619
AC006041.2	-0.948346	0.21263	1.14688	1.21657	-0.439564	0.194003	0.51414	1.27847
AC006042.2	-0.0787374	0.890051	1.22655	0.0320138	-0.106595	1.45082	0.295104	0.512233
AC006059.1	0.0710375	1.03252	0.81242	-0.0568597	-0.0471385	-0.170647	-0.212456	-0.000778542
AC006059.5	0.250106	0.432754	0.94631	-0.310955	-1.66614	-0.206452	0.39993	-0.144967
AC006064.2	0.102544	1.437	0.84039	0.925952	-0.498624	-0.249034	0.355595	2.37932
AC006115.2	0.0929001	-0.10933	-0.0382955	-1.22955	-0.957214	0.921438	-0.109168	0.0997049
AC006116.8	0.100334	1.44445	0.83522	1.07593	-0.963222	1.18213	1.19556	1.10819
AC006141.1	-0.0216645	-1.2162	-1.45022	-0.315056	-1.71867	-0.5945	0.245801	-0.0505381
AC006145.1	-0.0407534	0.871808	1.01534	-1.52434	-1.15089	-0.943478	-0.309614	0.455448
AC006148.1	-0.011875	-0.950038	-0.277561	0.0911722	0.431071	-1.14908	-0.333213	-0.107499
AC006150.1	-0.0599861	1.07707	0.553813	0.0708662	0.134271	0.990709	0.86923	0.00489909
AC006157.1	1.0179	1.27419	0.437755	-0.479611	0.109026	0.152463	0.0355177	6.16226
AC006160.1	0.517642	0.949761	0.0307769	-0.727577	-4.08418	-0.0298286	0.0928954	0.56879
AC006213.2	-0.0988134	0.472249	1.13564	0.6669	0.273244	1.16905	-0.451681	-0.208175
AC006213.3	-0.0732071	-0.0746037	0.112586	0.00264578	-0.596323	0.18575	-0.900381	-0.290919
AC006262.1	0.132928	-1.25323	-2.78131	0.529854	0.231061	-4.61912	-0.937989	-1.5173
AC006262.2	-0.0338676	0.981612	0.236809	1.39546	-0.0299776	-0.36793	0.485472	0.208227
AC006270.1	-0.0332877	1.29095	1.23177	-0.0958528	-0.425519	0.0415154	1.16306	0.235582
AC006299.1	-0.492198	0.180399	0.264848	-0.0243026	-3.04844	-0.167824	0.263769	-0.353434
AC006333.1	0.763144	0.372847	-0.0308025	-0.369104	0.184027	-0.583557	0.504623	0.167746
AC006333.2	0.57351	-0.282312	-0.819302	0.260875	0.476162	0.438875	-1.33647	-0.900482
AC006348.1	0.726573	0.615244	0.168164	-0.570633	0.741553	0.336496	-0.210473	-0.00904544
AC006355.2	-0.0116821	1.25365	1.00769	2.74686	-0.875248	-0.457315	0.221846	0.521881
AC006378.1	0.104613	0.871692	0.533887	-0.0863233	-1.25134	-0.18637	0.0648022	-0.0614571
AC006387.1	-0.0322384	0.96232	0.801481	0.625739	-0.165754	0.0765608	0.319888	0.958652
AC006427.2	-0.240411	0.910567	0.422196	0.311126	-2.42128	-0.70969	1.16644	-0.202545
AC006449.3	-0.4763	0.563327	0.357045	0.0440021	0.191902	0.941708	0.523062	0.795377
AC006449.5	0.290167	-0.173727	-0.0364491	0.0958193	0.2043	0.877576	-0.174047	-0.730911
AC006449.6	-0.148995	1.35226	1.41784	0.185661	0.340313	-0.0636812	-2.64466	-0.140436
AC006452.1	-0.659101	-0.709605	0.312438	0.993638	0.0189773	0.0581063	0.127312	0.447378
AC006460.1	-0.0134064	1.49417	1.19315	-0.279777	0.152726	-0.465929	0.433443	0.858354
AC006460.2	0.307849	0.689256	0.289646	0.290381	0.294548	-0.220625	0.282212	0.0935316
AC006480.2	-0.127909	1.1844	1.02237	0.3252	-0.297966	-0.931508	-0.00237708	-0.00928295
AC006487.1	0.0536855	-1.13396	-2.14348	2.17859	0.0150831	-0.537351	0.770752	0.265171
AC006504.1	0.561092	0.303341	0.312457	-0.212473	-0.0324761	0.745141	0.376307	0.137964
AC006504.2	-0.0594048	1.16418	0.459541	-0.193013	-1.78553	-0.38609	1.50007	0.734199
AC006504.5	-0.0821068	0.351751	0.541683	-0.0517838	-1.14496	0.491729	1.68223	0.54577
AC006511.6	0.159108	-0.35973	-0.26533	1.61194	0.11697	0.567859	0.25245	0.00188579
AC006525.1	-0.0654961	1.6954	0.0424201	-0.369547	0.84037	3.52792	2.62219	1.17462
AC006547.1	-0.0559868	1.33726	0.55455	0.025077	0.0511252	0.579102	0.878539	1.26108
AC006581.2	-0.153208	0.538946	0.417147	-0.534097	-0.201742	1.01359	1.77934	1.00465
AC006942.1	0.269368	-0.485257	-0.114848	0.188665	-0.0915415	-0.0496394	0.00177797	-0.726579
AC006994.2	0.164553	-1.70877	-1.05026	0.212101	1.70023	-0.496685	-1.0392	-1.52825
AC007001.1	1.00781	-0.63763	-1.21933	-0.748613	-0.247083	-4.85025	-1.3072	0.889385
AC007009.1	0.640415	0.153801	-0.324594	0.342112	0.0894412	1.67222	0.108429	-0.796349
AC007014.1	0.0463111	1.65346	1.48907	0.062733	-1.07551	0.157701	1.41472	1.37956
AC007036.1	0.343593	2.27298	0.889977	1.00228	0.0314009	0.0766451	0.981899	0.581343
AC007036.5	-0.382151	0.559024	0.490394	-0.0702806	0.759625	0.353415	1.29272	-0.0373758
AC007038.1	-0.096914	0.976523	0.0841121	-0.0807867	-0.70603	-0.529891	1.64871	0.230828
AC007038.2	-0.0962583	0.927688	0.152115	2.32341	0.126557	1.2847	0.621469	-0.146113
AC007066.2	-0.0446433	-0.429013	-0.0765695	0.367802	-0.204828	-0.11881	-0.298477	-0.293941
AC007091.1	-0.545402	0.212563	0.110899	-0.316724	0.248997	0.278707	1.08772	0.762185
AC007098.1	-0.0490815	1.61415	0.892595	0.726644	-0.173464	0.00682736	0.422928	0.323367
AC007114.1	0.0762615	1.26236	0.884865	-0.107946	0.138115	1.80118	1.12714	-0.872773
AC007114.2	0.0831697	1.44286	0.86539	0.0538134	-0.0278468	0.173104	0.462815	0.159789
AC007130.1	-0.0168038	1.05461	0.88681	1.1074	-3.504	-0.0646488	0.103343	0.430935
AC007193.1	0.0608225	1.23958	0.465328	0.1079	-0.524836	0.347486	1.59745	0.905999
AC007193.2	-0.362385	0.602713	0.569629	0.208666	-0.925678	-1.23349	0.541366	-0.1574
AC007216.2	0.345552	1.18648	0.56087	-0.469032	0.136219	4.75811	3.27147	0.274556
AC007216.3	-0.188452	0.655947	0.948815	-0.0454664	0.037495	1.83003	3.07988	-0.0419344
AC007216.4	0.0587094	1.11939	1.5116	0.163802	-1.86137	1.35897	2.18017	0.300309
AC007220.1	-0.197971	-0.214733	-0.138467	0.108	-0.306216	-0.317837	0.287514	1.0125
AC007221.1	-1.32682	0.225872	1.00918	0.67218	-0.386063	-1.25903	-0.420384	0.247463
AC007240.3	1.78123	0.266121	-0.197506	0.217476	0.0455901	0.159848	0.277927	0.109244
AC007255.1	0.0041296	2.51317	1.52556	-4.19025	-0.0183557	-0.0691105	1.63796	1.51061
AC007262.2	-0.321812	-2.15782	-0.0884684	0.774345	-0.68952	0.0270571	-0.242265	-0.277669
AC007285.1	-0.325656	0.00227975	0.101639	0.170365	0.0109131	0.0396356	0.00595504	0.156232
AC007285.2	-0.0145032	0.87456	0.98017	-0.181941	0.127845	0.482295	0.491397	0.458624
AC007292.1	-0.165156	-0.587559	-0.60278	1.06405	-0.18488	1.463	1.00185	0.275518
AC007292.3	0.272153	0.965187	0.411554	-0.115813	-0.297721	1.27901	0.844871	0.590214
AC007314.1	0.235086	1.09513	0.709891	0.631325	-0.527085	0.951398	1.09916	0.498382
AC007319.1	0.0122925	0.744321	-0.0807796	0.000870271	-0.359239	3.55286	1.66899	0.423145
AC007325.4	-0.246361	-1.06313	-0.661543	0.233821	-0.145013	1.17672	0.16647	0.0999706
AC007336.1	-0.143418	1.08893	1.22723	-1.06916	0.167779	0.7218	1.95153	0.889297
AC007336.2	-0.0902435	-1.91001	0.144094	-2.95718	-0.224915	-0.194422	0.416712	0.504735
AC007347.1	-0.131081	0.440518	0.209216	1.023	-0.038516	-0.882922	0.368322	0.316345
AC007349.2	0.0644168	0.482908	0.0227768	-0.169673	-0.179973	2.0619	0.041746	0.711787
AC007364.1	-0.8487	-0.434489	-0.541289	-0.111084	-0.786143	-0.155332	0.610516	-0.0475485
AC007376.2	-0.177657	-0.579996	-1.39499	0.408667	-0.123095	0.0603544	-0.408876	-1.82492
AC007383.2	-0.101003	0.200151	0.0945011	-0.0524686	0.110376	1.00819	-0.0138344	-0.271393
AC007383.3	0.252789	1.77364	1.32231	-0.713353	0.0730093	0.439686	-0.0941547	-0.249415
AC007384.1	-0.144982	1.34591	1.43199	-0.0423618	-1.19067	0.813049	0.748065	3.21097
AC007387.2	-0.12107	-0.42379	-0.65649	-0.0135436	-0.203613	0.197833	0.966156	-0.0651323
AC007387.3	0.156684	-0.820529	-0.987451	3.34808	0.193743	0.119844	0.0629686	-0.982665
AC007389.1	-3.38867	-0.880285	0.522789	0.640084	-1.23713	2.13724	3.51618	-0.0449089
AC007389.3	-0.166052	0.680964	0.945784	0.861525	-0.8809	3.50074	3.39737	0.739932
AC007390.2	0.0652365	-0.236039	-0.332957	-0.302109	-0.798966	0.328044	0.580434	-0.109818
AC007402.1	-0.83156	0.0918879	0.178398	0.083786	-0.275649	0.899603	1.57066	0.485848
AC007405.1	-0.0860623	-0.206734	-0.0237691	-0.0509027	0.0122999	2.07422	1.12502	-0.763305
AC007405.3	0.0184501	-0.335946	-0.0726791	-0.112265	-0.0572787	-0.182464	-0.554735	-1.06205
AC007406.3	0.0998147	0.772118	0.143573	-0.525661	-0.479235	-0.266474	0.122308	0.653867
AC007406.5	0.00138859	1.13576	0.669511	-0.659362	-0.121078	0.628397	0.464677	0.393596
AC007448.5	-0.246459	-0.516197	-0.150021	1.06916	0.488911	0.0414608	1.7161	0.0850193
AC007493.1	-0.394428	-0.322181	-0.509251	0.800609	-0.189167	-0.649341	-0.165836	0.249564
AC007494.2	-0.00953253	1.15539	0.965481	-1.38935	0.0843205	0.847863	0.605308	0.919603
AC007495.1	-0.121575	1.1768	0.518723	0.21573	-2.32306	-0.220929	0.833174	1.5116
AC007533.1	0.022007	1.15593	0.873052	0.0112454	0.0607491	-0.0645228	0.247938	0.667986
AC007541.1	0.168783	-0.406124	-0.049861	-0.25988	0.7356	-0.0587162	-1.53501	-0.339455
AC007563.2	0.0535397	-0.53301	-1.44937	-0.230967	2.33339	0.168593	-0.551914	-0.912063
AC007566.1	-0.117324	0.0665227	-0.153975	-0.666137	-0.754247	-0.567195	0.968902	-1.66559e-05
AC007608.1	-0.159701	0.320979	0.317974	-0.553137	-1.21867	-0.535989	0.143415	0.353078
AC007608.3	-0.18545	1.33643	0.920659	1.43877	-0.441571	0.0490349	0.170998	0.0921621
AC007610.2	-0.194162	1.85595	0.538493	3.31106	-1.05601	0.472612	0.430316	0.688622
AC007614.1	0.0552253	1.52893	0.850345	0.563329	-0.673694	-0.13009	-2.86355	-0.952968
AC007619.1	0.0215791	0.959878	0.682706	-4.83132	-0.129591	-1.11863	0.142326	0.589944
AC007622.2	0.560162	0.870406	0.0104861	-0.113268	-1.14486	0.744045	0.911729	0.427664
AC007638.1	0.598279	1.51303	1.22557	-1.82728	0.160839	0.351476	0.176847	0.636286
AC007638.2	-0.103073	0.316756	0.482797	0.257871	-0.405197	-0.0797741	-0.0343395	0.305913
AC007666.2	-0.279101	2.30284	1.26821	0.392529	-0.0129515	-0.394662	0.286645	0.45252
AC007681.1	-0.626612	0.387649	0.949314	0.0751986	0.0418215	0.601629	0.71677	1.53676
AC007686.2	0.00972278	1.04315	0.14705	-0.490668	0.252466	0.0938483	2.26932	0.963111
AC007686.3	0.178278	0.988852	-0.142639	0.228928	-0.396522	0.0831274	3.02861	0.688636
AC007686.4	-0.088169	0.332949	-0.140097	0.181274	0.36879	0.44403	2.27929	0.106588
AC007695.1	-0.0415515	2.09881	0.771926	0.0738068	-0.769977	0.00259558	0.350864	0.303689
AC007728.1	0.022675	1.31815	0.722516	1.41774	0.0850722	0.0211908	-0.0902053	0.0966922
AC007743.1	-0.079437	1.20101	0.772367	-1.43883	-0.305304	0.0426845	0.267382	1.25616
AC007773.1	0.682511	-0.199608	-0.189608	1.17775	0.0303549	1.06205	0.00292082	-0.637002
AC007780.1	-0.218835	-0.21747	-0.0978847	-0.762951	0.938757	-0.565059	0.473812	1.10961
AC007785.1	-0.386433	-1.68812	-2.01426	-0.447343	0.496314	-1.98406	-0.1872	-0.405189
AC007785.3	0.229128	1.25959	0.609073	0.722185	0.251479	0.188573	1.347	0.0179742
AC007786.1	0.0645679	-0.457638	-0.645413	0.21247	-0.44684	-0.185268	0.160929	-0.977702
AC007878.1	-0.600946	-2.42999	-1.07998	1.01654	0.427555	-0.212054	0.239586	-0.242198
AC007938.2	0.58595	1.03985	0.827542	-6.37954	-0.319387	-2.12906	0.175722	0.693349
AC007938.3	-0.304826	0.282133	1.28872	-2.51535	0.285496	-0.101218	0.120069	0.387042
AC007952.4	0.0125754	-1.49525	-0.215733	0.599897	0.67014	0.525224	-0.974269	0.421523
AC008014.1	0.317865	-0.287327	-2.80544	1.14584	-0.149553	0.406451	1.75186	-0.0811292
AC008050.1	-0.210037	0.666052	0.89514	0.156955	0.395447	-0.511516	-1.15008	-0.641515
AC008056.1	-0.010511	1.10702	0.76214	0.236734	-0.726683	-0.721352	0.481367	1.20822
AC008056.2	-0.032352	1.09683	0.761985	0.768613	-1.26178	-0.313571	0.832996	1.9981
AC008056.3	0.152708	0.267217	0.0295023	1.03208	-1.087	-1.1173	0.35397	0.264307
AC008067.1	-0.0452397	1.2185	0.782406	0.104931	-0.287111	-0.391825	0.0260312	-0.378614
AC008079.1	-0.0865469	-0.0675228	-0.0398078	-0.308639	-0.222876	1.47542	0.884752	0.237642
AC008083.2	0.0312489	1.15514	-0.0975344	3.33784	-0.0855	-1.15254	0.318907	-0.315782
AC008083.3	0.919272	-0.082448	-3.06135	1.48489	0.0103232	0.885395	2.05427	-0.0862779
AC008105.1	-0.115705	1.34455	1.8304	0.0378203	4.27367	0.441694	-3.09266	-5.08023
AC008105.3	0.178287	-0.0319974	-0.0475683	0.373465	0.122587	0.464295	0.0421274	0.197119
AC008115.2	0.543365	1.66789	0.579042	0.458085	0.247114	0.137122	2.60503	1.52506
AC008119.1	0.0821699	1.44347	0.942228	0.0268564	-0.852428	-0.171469	0.792233	0.670555
AC008124.1	-0.050633	-0.111549	0.406748	0.556472	2.19603	-0.353451	-2.04707	-0.471101
AC008133.1	-0.293057	0.816462	0.664254	-0.0863295	-0.0884067	0.769904	0.487643	0.0292507
AC008264.2	0.692133	-0.40102	-0.743139	0.246815	-0.160413	-0.109605	-0.648034	0.0972756
AC008267.5	0.251395	0.792638	0.181984	0.225637	-1.33608	-0.999336	-0.0519139	0.129772
AC008269.1	-0.0875214	0.0124266	0.0967591	1.49257	-0.952181	-0.00425944	0.097799	0.0647171
AC008277.1	-0.0342522	0.94437	0.315913	2.39243	-0.542021	-0.222097	0.312025	0.801885
AC008393.1	0.56555	-0.858934	-0.547924	1.18444	0.325437	-0.300908	-0.664817	-1.16761
AC008397.1	0.827923	2.50537	1.14931	-1.62447	0.739389	0.175386	0.230184	0.101345
AC008403.3	0.270278	-0.0522415	0.167296	0.770297	-0.10787	-0.101567	0.235536	0.136406
AC008415.1	-0.247534	-0.0979709	-0.0967938	0.0299119	-0.179726	-0.0977448	0.122409	0.904809
AC008429.1	-0.481869	-0.173181	-0.0898774	0.424317	-0.0918986	1.78073	0.80768	-0.0199178
AC008429.3	0.5649	0.522733	0.123938	0.226349	0.276719	0.111071	0.0907676	-0.14561
AC008438.1	-0.0327107	0.357189	1.06434	0.151204	-0.26545	1.09119	0.0323239	-0.0721247
AC008438.2	-0.265034	0.318031	0.79478	0.00334389	-2.27067	-0.454803	0.334205	0.208037
AC008443.1	-0.104695	-0.16467	0.264876	0.239754	3.57614	0.457896	0.490942	1.19167
AC008443.4	0.542092	-0.0063457	-0.216544	1.02733	2.24789	0.73797	0.340263	-0.130331
AC008443.5	0.126521	-0.26272	-0.785235	0.832817	0.659169	0.308953	-0.388411	-0.0544503
AC008462.1	-1.69529	-0.0035986	0.0815302	-0.0679844	-0.902995	-0.888196	0.0452968	0.0909487
AC008467.1	-1.03296	-7.37824	-0.369491	-0.22616	-0.701975	0.792247	0.630813	-0.186618
AC008474.1	-0.043322	0.354116	0.19879	1.36542	-0.308314	-0.0491028	0.808407	0.798841
AC008525.1	-0.203858	0.879842	0.543555	0.276626	0.0367851	0.599542	0.974363	0.479562
AC008537.2	-0.0720911	1.29189	1.15283	-0.725181	-0.00787497	0.216519	0.77654	0.964235
AC008537.4	-0.0368752	1.20299	0.726641	-0.913476	0.086188	-0.77476	-0.0394178	2.04078
AC008543.1	-0.0901491	-0.037949	-0.485553	-0.299	0.0142257	-0.771854	0.678892	0.150851
AC008549.2	-0.34502	-0.177842	-0.0321969	0.505101	0.43058	0.113665	0.213118	-0.152109
AC008554.1	-0.00344424	1.0225	1.04105	1.70349	0.0628365	0.173231	0.192117	0.330615
AC008555.5	1.02807	0.150911	-0.524715	0.203801	0.839632	0.027856	0.743416	-1.1296
AC008568.1	-0.0272081	0.948203	0.398449	0.51564	-0.278789	0.20247	0.565497	0.949454
AC008569.2	-0.287078	0.114322	0.130986	-0.600016	0.254628	-0.197205	-0.00908737	0.0285666
AC008571.2	-0.347822	-1.12504	-0.589535	-0.387669	0.196656	-0.12058	0.851777	0.0588437
AC008591.1	0.0379921	-0.0690155	-0.968144	0.799843	-0.234667	0.186599	-0.0619986	0.0743746
AC008608.2	0.776943	0.0830149	-0.123743	-0.0479788	0.576299	-0.0723638	-0.467419	-0.456386
AC008610.1	-0.0865179	0.532336	0.222517	1.05569	0.516198	0.0296683	-0.13712	-1.01971
AC008629.1	-0.690185	-0.632023	0.585214	0.33504	-2.49721	0.711406	0.0764884	-0.926018
AC008655.2	0.0742565	0.388674	0.353339	1.14563	-0.594768	-0.736611	-0.526969	-0.0763137
AC008667.1	-0.220195	-1.64668	0.0220232	-1.80465	1.4252	0.696528	0.360119	1.11866
AC008674.1	0.00650859	1.07849	0.687952	0.150225	0.126907	0.973322	-0.0784834	0.409484
AC008676.1	-0.0395894	0.576228	0.115003	-0.59322	0.896559	-0.0870172	1.49007	0.416443
AC008691.1	-0.251994	0.583764	1.15169	0.959989	0.468905	2.53958	2.07412	0.915718
AC008696.2	0.232882	1.03822	0.0570794	6.82047	0.25071	-0.527018	0.126816	0.361851
AC008700.1	-0.384026	0.542289	0.339232	-0.170097	-0.995006	0.0310249	0.239065	0.313855
AC008708.2	0.0454713	1.9808	1.33451	-1.11846	-0.208522	0.372306	1.72374	1.81932
AC008728.1	0.127832	0.866149	0.195166	0.834953	-0.101684	0.176947	0.409459	0.651962
AC008731.1	0.0231953	1.28605	1.05849	-0.00707562	0.0242593	0.973619	0.411201	1.18549
AC008735.2	-0.0945922	0.744297	0.396383	1.2106	-0.203799	0.465014	0.301067	0.230475
AC008736.1	0.0648416	1.3199	1.44665	0.507796	0.298938	0.913991	2.34131	1.05956
AC008738.1	0.0209616	0.680479	0.564243	0.996858	0.472211	-0.230893	-0.415705	0.348034
AC008751.3	-0.831008	-1.59729	0.179712	-0.0248641	-0.161025	1.36814	-0.183161	-0.235833
AC008758.2	0.099448	1.06207	0.514981	1.01272	0.156015	-0.314887	0.0981815	0.136536
AC008761.1	0.342878	0.961807	0.44317	-2.065	-0.352705	1.22737	1.08094	0.262334
AC008764.2	0.221232	0.572238	0.448003	0.466223	-0.146125	-0.0154091	0.140631	0.0585624
AC008764.6	-0.0554466	-0.428661	0.363009	0.259749	-0.75178	-1.15284	-0.0690664	-0.150318
AC008764.8	0.55635	0.197235	0.221734	0.801552	1.13164	-0.265734	-0.699451	-0.293048
AC008770.3	-0.149425	-0.0133711	0.279348	1.48188	0.525034	0.190098	-0.00463849	0.25461
AC008771.1	0.137998	1.78963	0.742672	0.538871	-0.37042	-0.0845078	0.247041	0.981364
AC008781.1	0.235966	1.36324	0.831153	0.600791	-0.0939488	0.102363	0.409054	0.111968
AC008781.2	0.296208	1.38398	1.00693	-0.905025	0.551328	2.06633	1.85092	0.962322
AC008781.3	-0.253864	0.404089	0.493485	0.0324173	-0.841372	-0.143946	0.312536	0.620192
AC008808.1	-0.353521	1.76767	1.00713	0.554744	1.54248	0.491139	-0.0357839	0.145997
AC008840.1	0.851402	-0.644332	-0.14186	-0.0881198	0.0825069	0.00917088	0.189362	-1.07572
AC008870.2	0.980744	0.342644	-0.358537	-0.268672	0.126899	-0.293366	0.417774	-0.341673
AC008870.4	-0.12358	0.999303	0.410971	1.03173	-0.115692	0.04347	0.487112	0.286
AC008871.1	-0.135003	0.920543	0.860533	1.1967	-0.575606	0.358035	1.09952	0.664821
AC008883.1	0.0595988	1.19437	0.319402	0.00790499	-0.468178	0.616461	1.53521	0.627357
AC008892.1	0.0353994	0.509208	0.422557	0.768025	0.0777464	-0.190954	0.0949392	0.15951
AC008897.2	-1.30058	0.1673	0.4454	-4.38813	0.420651	3.01331	1.28335	0.16654
AC008906.1	-0.164477	1.0613	0.630421	0.581217	-0.935377	-0.104922	0.140612	1.10156
AC008906.2	-0.217804	0.894837	0.861895	0.208794	-1.08073	-0.284122	-0.220901	0.144164
AC008937.2	-0.00191177	1.46541	1.42527	1.10563	-0.287762	0.0886526	0.0159755	0.916467
AC008946.1	-1.66863	-0.0233852	0.358111	0.0479172	0.138222	0.382013	0.929153	0.648261
AC008966.1	-0.202983	-0.788588	-0.278876	0.551791	0.0877171	0.443211	-0.801082	-1.9138
AC008969.1	0.348564	0.491119	-0.11842	0.121663	-1.16281	-4.92718	-1.20748	-0.02506
AC008969.2	-0.120199	-0.303769	0.0564109	0.481463	0.829535	-0.0828408	0.116925	1.22616
AC009041.2	-0.151883	0.0649917	0.448528	-0.420813	-0.272146	1.43085	0.152184	1.0616
AC009053.3	-0.170389	1.62264	2.01506	0.00362659	-1.00833	0.710445	0.680552	1.56384
AC009060.1	-0.0437883	1.10491	0.691483	1.01914	0.491559	2.96233	0.706522	0.437514
AC009061.2	-1.04505	-0.978137	-0.0681775	1.04426	-0.540015	-1.52038	0.556986	0.306186
AC009065.4	0.378447	-0.0475698	0.783789	-0.347875	-0.3361	0.395123	0.362489	0.0754709
AC009081.1	-0.338933	1.41601	0.946595	-1.49878	0.0253963	0.059636	1.41696	0.357049
AC009090.6	-0.00421981	0.978884	0.746359	-1.19873	-0.287855	0.584696	0.444965	0.19198
AC009093.2	-2.09499	-3.45098	-0.132564	0.0462939	-0.347085	-0.104472	-0.124751	0.721326
AC009097.1	-0.0517306	1.2056	0.840929	0.349889	0.0671051	0.496994	0.165279	-0.172996
AC009097.3	-0.589345	-1.05036	-0.442185	-5.7057	1.92752	2.83934	1.76904	-0.537127
AC009102.4	-0.132638	0.713732	0.696749	0.312486	-0.00296519	-0.416578	-0.159271	0.762915
AC009107.2	-0.00305197	0.414839	0.549176	-0.0211753	-0.147357	1.18255	0.460258	0.340769
AC009113.1	0.479275	-0.858012	-0.902017	0.00516943	0.343502	-0.262551	-1.10236	-0.652625
AC009118.3	0.00320966	1.66296	0.817523	-0.383989	-0.349557	2.43314	0.725732	0.323826
AC009120.2	-0.160179	-0.772762	-0.542189	-0.460558	-0.55497	0.811629	3.38748	0.90121
AC009120.4	0.0596586	1.17489	0.499944	-0.10019	-2.21926	0.212219	1.15591	-0.946828
AC009120.5	-0.0653519	0.209719	0.09197	0.203121	-0.563483	-0.444669	0.0226588	0.00944251
AC009126.1	-0.322774	-1.72885	-1.0146	0.716942	-0.116573	-0.742058	1.50709	0.153405
AC009133.1	-0.0397542	2.21145	2.21016	-0.108047	-0.974426	0.20084	0.365123	0.91001
AC009137.1	0.0197029	1.40382	0.844992	0.022008	-0.248955	0.383678	0.714932	0.90837
AC009139.2	0.932442	2.8222	0.306306	0.044439	-0.230007	0.264188	0.994444	-0.103428
AC009148.1	-0.0822938	-0.754077	-0.891592	-0.0341552	-0.339692	-0.305643	-0.329487	0.465504
AC009163.1	0.537836	1.00372	-0.168307	0.0179031	-1.37136	0.318212	1.25209	0.687571
AC009163.7	-0.110495	-0.575199	0.112072	-0.407561	0.372934	0.0493275	-1.1163	0.00641924
AC009185.1	0.100842	-1.38935	-0.966322	-0.125663	0.0076943	1.68929	0.57394	0.129313
AC009226.1	-0.243518	0.0817306	0.0938902	-2.28903	-0.201467	-0.779446	1.03046	-0.547362
AC009227.1	-0.0168298	1.07823	0.656487	-0.0514223	0.408033	0.186555	0.0642819	-0.100476
AC009228.1	0.249821	1.06678	0.0476513	0.0100593	-0.590883	-0.282817	1.67228	0.270541
AC009237.14	0.430044	-0.319403	-0.126907	0.614773	0.00498058	0.587125	-0.372005	-0.535902
AC009242.1	-0.145145	0.946855	0.365906	-1.23588	-0.855495	-0.808167	1.16258	1.62418
AC009244.2	-0.0328529	1.05307	0.933473	0.678408	-0.0753345	-0.555021	0.506835	1.70037
AC009264.1	-0.778348	-0.524287	-0.0931221	-0.00872925	1.3223	0.339347	0.370936	0.27554
AC009269.2	0.32932	0.855201	0.190927	2.89582	0.00315175	0.347582	0.589656	-0.20599
AC009275.1	-1.08843	-0.0533853	0.216086	-0.154205	-0.457928	0.00893747	-0.358035	-0.322333
AC009283.1	0.310938	0.0407644	-0.0684311	0.180547	-0.221053	-0.52242	-0.140627	-0.259801
AC009299.3	-0.785396	-0.777087	-0.234002	2.87988	0.853968	-0.0129816	0.424295	-0.247469
AC009303.2	0.241074	0.86671	0.496822	0.638969	0.127305	0.929375	0.17465	0.152909
AC009309.1	0.998003	-0.366642	-0.121166	0.421498	0.540148	0.285653	0.0905201	-0.361641
AC009315.1	-0.997604	0.737335	0.798686	1.86835	0.595804	0.445308	-0.118452	-0.0518887
AC009318.1	-0.752902	-0.294212	0.546494	-0.126092	-1.43847	-0.844932	1.48135	0.783134
AC009318.3	-0.0726993	0.710162	0.530619	-0.00670523	0.270448	-0.207825	0.279068	0.214892
AC009365.4	-0.0509828	1.03336	0.638718	0.290382	-1.16812	0.0825937	0.455247	0.982484
AC009396.1	0.00606671	0.450117	0.180425	-0.119433	-0.217117	0.844407	-0.103011	1.08145
AC009396.3	0.00215325	0.623567	0.357893	-0.190842	-0.102367	0.179963	0.771167	1.57222
AC009403.1	-0.0609408	1.54756	1.34981	0.0928401	-0.760924	-0.221327	-0.488111	-0.252063
AC009404.1	0.189111	0.349969	0.734055	-1.1675	0.867911	-0.0589199	-0.797939	0.552321
AC009432.2	-0.17891	0.434783	0.705154	0.0152227	0.437956	0.58292	0.0325292	-0.563777
AC009478.1	1.43431	-0.149701	-0.0450802	0.129452	-0.216249	0.188761	0.726005	0.577123
AC009486.2	0.762664	0.289418	-0.129889	0.496635	0.408913	-0.100436	0.0499224	-0.000577122
AC009495.1	-1.06044	-1.54946	0.162434	-0.449849	0.564918	4.24471	3.88861	0.581466
AC009501.3	-0.07198	1.09229	0.408022	-0.135936	-0.170451	0.0375292	0.849585	0.97346
AC009505.1	0.0983001	1.90437	1.41818	2.17984	0.248906	-0.432322	-0.397889	1.33663
AC009506.1	-0.217005	0.553173	0.586246	0.213759	0.0492373	-0.2176	-2.82246	-0.28371
AC009522.1	-0.184677	-0.912739	-0.934767	0.693867	0.0749259	-1.44294	0.421089	-0.207923
AC009542.1	-0.0623121	0.944742	0.484426	-0.216811	-0.0496905	0.565499	0.920744	0.20409
AC009554.1	0.0269216	1.62061	0.74991	0.689103	-0.429628	-0.110094	0.329093	1.01297
AC009560.3	-0.0293396	1.1904	0.780375	0.573321	-0.996248	-0.293922	0.441228	0.61391
AC009560.4	-0.0754199	0.955139	0.533207	4.5487	0.318598	0.285818	0.406864	0.960785
AC009562.1	-0.185254	2.05412	1.05903	0.0536923	-0.399662	-0.214198	0.128798	0.521601
AC009570.1	0.384086	0.91736	0.233523	-1.0327	0.36831	-0.0300835	0.19562	-0.2192
AC009623.3	-0.232779	0.776034	0.449975	-0.313599	-2.95418	-0.292983	0.0665714	-0.306547
AC009630.1	-0.121423	0.484469	1.32529	0.198258	-1.56213	1.2657	1.00739	0.966889
AC009686.1	0.263021	1.0715	0.534453	-0.753074	-0.0515686	0.174117	0.442905	0.32536
AC009686.2	-0.484034	-0.404201	0.207393	-0.377146	0.210882	-0.836379	-0.916641	-0.173816
AC009690.2	-0.0348865	1.27327	0.613799	-0.0490799	-0.465492	0.0197315	1.60066	1.21488
AC009716.1	0.104615	1.29227	0.592735	0.0329542	-1.1427	-1.36341	0.219665	0.578873
AC009754.2	0.00743918	0.690104	1.14018	0.138083	-0.129847	0.035592	-0.722467	-2.48805
AC009779.2	0.0280815	-0.660127	-0.370731	0.938346	0.336579	0.60118	-1.47984	0.0211133
AC009802.1	0.562493	1.41009	1.21447	-0.12252	-0.720073	-0.00422098	2.4509	0.100869
AC009812.1	0.0196043	-0.661825	-0.666454	0.0309826	-0.636541	-1.02221	-1.35458	-0.395963
AC009831.1	0.0847574	0.133823	0.0220555	-0.12901	-0.992147	0.0943028	-0.499933	-0.161322
AC009879.4	-1.38697	-0.0359637	0.346246	0.385088	0.0213342	-0.869531	0.52849	1.04676
AC009899.1	-0.24895	0.013991	0.565663	-0.170407	0.643784	-0.472483	-0.0741003	0.337006
AC009950.1	0.00401484	0.606728	0.113501	-0.820985	-0.317049	-1.12778	1.44484	0.133169
AC009951.5	0.613098	0.876239	0.112263	2.02226	-0.110055	0.235248	0.826227	0.38607
AC009951.6	1.97117	-0.149953	-0.54706	0.264165	0.168897	-0.141692	-0.214833	0.183878
AC009955.3	-0.152953	-0.911107	-0.448042	-0.286581	0.109373	0.245999	-0.0579271	0.204452
AC009955.4	0.603431	-1.00187	-0.20195	0.665093	0.218793	0.392755	0.11388	-0.10292
AC009961.1	-0.00816864	-1.01467	-1.11381	0.42098	2.38319	-0.775473	-0.427971	-0.0868859
AC009974.2	0.289829	1.29334	0.31808	0.561437	1.24225	-0.0327245	0.229231	0.499586
AC009975.1	-1.0715	-0.8384	-1.2829	0.61628	0.461446	-0.141611	0.224902	-0.234821
AC009975.2	-0.709938	0.105346	0.176316	0.114884	-0.0159884	-0.0164967	0.166298	-0.280841
AC009996.1	-0.0306665	1.65123	1.03881	-0.0368894	0.12779	0.978383	1.4271	0.308071
AC010092.1	-0.489052	-0.39704	-0.204631	0.985239	0.0402695	0.197954	0.137655	-4.08625
AC010148.1	0.0621214	0.330657	0.0392257	-0.0695399	0.298083	0.663588	-0.32196	0.460949
AC010157.1	-0.0213547	0.905416	0.770194	0.0516664	-0.42082	-0.0951817	0.547364	0.410281
AC010168.1	0.000421202	1.21013	1.05346	-0.0324809	1.56428	0.282429	0.881728	0.793311
AC010168.2	-0.165206	-2.29607	-0.352177	2.48328	1.28565	-0.197441	-0.103085	0.431854
AC010173.1	0.253373	0.438884	0.335758	0.0329825	0.834015	1.09833	0.447223	0.316159
AC010175.1	-2.85471	0.0538079	0.601392	-0.49114	-0.373645	-0.0518967	0.00252425	-1.15423
AC010198.1	-0.706664	-0.125685	0.212239	-0.0434772	-0.144334	0.13246	-0.0385786	-0.221422
AC010201.3	0.0890764	1.40386	0.74106	0.218762	0.149559	0.714111	0.271664	1.93778
AC010210.1	-0.320946	-0.0451367	-0.0639135	-0.530729	0.0559214	-0.623602	0.248376	0.276971
AC010226.1	0.26274	1.39169	0.841872	-0.54949	0.984015	-1.04736	-0.998875	0.633864
AC010260.1	0.130617	1.99472	0.603764	0.977795	-0.0391037	-1.00821	-0.159212	0.729743
AC010261.2	0.312208	0.732032	0.448424	0.0707131	-0.0973704	-0.314716	0.207439	0.90204
AC010273.2	0.10772	1.16157	0.305323	-0.250129	-0.207233	0.618093	0.954541	0.248316
AC010275.1	-0.00463321	0.96799	0.800226	0.697168	0.200339	0.126745	0.275717	0.774897
AC010285.3	0.608654	0.0914725	-0.0580235	-1.18849	1.09584	-0.19902	-0.854479	0.63761
AC010307.2	0.0732481	1.89429	0.864549	-0.327257	-0.195208	-0.414499	0.0182886	0.470893
AC010307.3	0.262706	1.90129	1.0554	-0.446584	-0.027995	-0.0793189	-0.0818181	0.225339
AC010307.4	0.267414	1.7382	0.540929	1.14287	-0.037562	-0.276291	0.249688	0.379522
AC010319.4	0.0278945	1.50187	0.644327	0.287807	-0.42782	-0.0622683	-0.0200481	0.805886
AC010320.2	-0.177278	0.574424	0.529654	0.212107	-0.518594	0.281973	0.140452	-0.122296
AC010320.3	0.864212	0.322303	-0.0686543	1.34857	0.133721	2.0392	0.125963	0.147905
AC010320.4	-0.0303313	1.15803	0.74277	1.05793	-0.571016	-0.212726	1.08446	0.504613
AC010325.1	1.17395	0.157456	0.0779659	-0.250415	-0.690021	0.459539	1.223	0.0667283
AC010327.5	0.0569342	0.421342	0.367782	-0.877862	-0.850512	-0.395655	-0.452529	-0.183092
AC010331.1	0.720192	0.41366	-0.0416122	0.714892	-0.115829	-0.152395	-0.257186	0.00592879
AC010332.3	0.0372551	0.464037	0.0968551	2.1602	-0.00132637	-0.482429	-0.134083	-0.120568
AC010333.2	-0.0875535	1.92322	1.3739	-0.345726	0.156962	1.26146	2.52804	0.713828
AC010336.3	0.0112016	1.26756	0.389698	3.15521	-0.0491392	0.139079	0.00781017	0.0672644
AC010336.8	-0.163231	-0.388737	0.214054	-0.32364	-0.280664	0.848122	-0.188452	0.315078
AC010343.3	-0.0176117	1.20663	0.090766	-0.202394	-0.728645	0.884235	2.7188	0.405134
AC010422.2	-0.797054	-0.122051	0.246149	-1.23894	-0.98132	0.915381	0.764861	0.604338
AC010476.2	0.0271962	-0.908917	-0.418426	0.588894	0.138263	-0.34613	-0.917031	0.00297829
AC010478.1	-1.14252	-1.13229	-0.0272234	1.25671	0.034303	-0.191342	-0.899994	-0.341096
AC010491.1	0.508672	-0.103967	-0.126829	1.13933	0.314571	2.24548	0.102715	-0.280134
AC010491.2	0.0246073	1.86477	0.501353	0.0674129	-0.312547	-0.0704409	0.23806	0.704377
AC010501.2	0.208364	-0.0127612	0.320963	1.74188	-0.616549	-1.16298	-0.204619	0.387459
AC010504.1	-0.0258667	-1.40041	-1.89672	0.326589	0.0246891	0.196429	-0.239341	2.1314
AC010528.1	-0.629443	-0.85138	0.570367	-0.599826	-0.619472	-0.48149	0.191301	-0.754938
AC010531.5	-0.200016	0.570655	0.570573	-0.595311	-1.56546	0.222893	0.80351	0.0335346
AC010531.6	3.8236	0.537332	-0.816356	1.07438	0.0358429	0.685769	0.0935703	-0.0656067
AC010538.1	-0.271863	0.0779193	0.992093	-0.139811	-0.623549	1.18896	0.839349	0.515233
AC010542.2	0.1007	2.97283	1.38675	-0.599072	0.0836223	0.116152	0.271121	0.204012
AC010542.5	-0.280909	0.0709669	0.147678	0.52728	-0.162245	0.429407	0.323383	-0.326401
AC010547.1	0.257601	-0.028415	0.00182743	0.367886	-0.079604	0.670568	-0.0032918	-1.04493
AC010551.3	0.240924	2.1096	1.52231	1.86624	0.370248	0.674511	0.505242	1.43167
AC010615.2	-0.966589	0.432122	-0.066744	0.303772	0.0658495	-0.901808	0.0457192	-0.609979
AC010618.3	-0.233121	0.860364	1.09627	0.537046	-0.878074	-0.133918	0.438583	0.0717375
AC010623.1	0.296713	1.85412	0.536454	1.10551	-0.174809	-1.46817	-0.294946	0.00625196
AC010624.2	0.941957	0.953016	0.431451	3.37868	-0.6873	-0.194658	-0.695523	-0.177382
AC010624.5	-0.190357	1.74918	0.417239	-0.506002	-0.142597	0.889796	0.365172	0.591508
AC010632.1	-0.0303061	1.07553	0.993061	0.247952	0.0983739	-0.334099	-0.683892	-0.591965
AC010632.2	-0.21047	0.227689	-0.289209	0.577243	-0.159761	-0.340731	-1.15133	-0.734112
AC010638.1	0.208292	-0.0345235	-0.0494214	0.876975	-0.222269	0.301154	0.511634	2.12322
AC010642.2	0.719556	0.3712	-0.144781	0.194417	0.165217	0.698361	-0.459627	0.0814336
AC010643.1	-0.0608225	0.0446638	-0.205996	-0.273836	-0.349884	1.77406	1.20273	0.0273015
AC010649.1	-0.038375	1.13911	0.38214	0.324775	-0.301266	-0.974326	1.43627	0.331668
AC010654.1	-0.0797894	0.67068	0.502349	-1.14815	-0.395052	0.97134	0.414397	0.0840905
AC010731.2	0.00734566	0.639074	0.435873	-0.241104	0.0822093	-0.420226	-1.15557	0.618911
AC010735.2	0.0864282	0.843648	0.707043	0.564607	0.524075	2.16768	-0.164099	0.28988
AC010789.1	0.199201	0.621802	0.553237	-0.280222	-0.199946	-0.489087	0.12644	-0.236395
AC010789.2	-0.500864	0.0999333	0.327623	1.45848	0.298718	-1.04839	-1.09027	0.162279
AC010809.1	-0.0632599	0.686777	0.716723	-0.239153	0.083409	-0.425637	-0.325854	0.694467
AC010809.2	-0.344915	-0.10373	0.0583882	-0.104504	-0.126345	-0.749281	-0.0737665	1.29817
AC010864.1	0.458445	-0.215027	0.000499399	0.0824247	1.26537	-2.39907	-2.05705	0.0390522
AC010884.1	0.173737	1.22894	1.48575	0.14848	-0.10879	0.846807	0.0970357	-0.156097
AC010889.1	0.0529077	0.38704	-0.817274	3.19364	0.0145454	-0.065512	0.47384	1.63831
AC010889.2	-0.304204	0.0626164	-0.065403	0.506299	-0.54095	-1.53315	-0.317564	0.00272523
AC010894.3	7.64373e-05	1.26199	1.09269	0.646951	-1.90494	-2.22611	-0.905187	0.451885
AC010896.1	0.41651	-1.17058	-3.62407	-0.208444	0.16073	-0.137834	0.621446	0.601944
AC010913.1	0.637918	0.905893	0.151765	0.501113	0.010599	0.687882	0.0329811	-0.209621
AC010967.1	-0.680263	-0.297062	-0.085379	0.0684396	0.313294	0.395683	0.219636	0.487291
AC010969.2	-0.297898	1.38869	0.971638	0.602714	0.288401	-0.510525	0.0167007	0.00895286
AC010974.2	0.00542323	1.12126	0.624999	0.17194	-0.0520621	-0.20325	0.286622	0.868804
AC010976.1	0.131219	1.56624	0.718077	0.25035	-0.476526	-0.167201	0.278162	0.396377
AC010978.1	0.0303811	1.23413	0.831743	-0.0434339	0.55711	-0.0871058	-0.181436	1.5927
AC010996.1	-0.601744	-0.602125	0.00546488	1.21188	-0.0661634	1.1393	0.00673947	-1.04103
AC010997.3	-0.125479	1.44665	0.444007	-0.949601	-0.0400491	0.137368	4.21901	1.1072
AC010997.5	0.121168	0.376879	0.360592	0.398933	0.519109	0.476595	-0.247882	-0.0519476
AC010999.2	0.735918	1.71771	0.835617	0.532774	-0.188046	-0.0793526	-0.0184641	-0.334951
AC011029.1	-1.70382	0.393664	6.05253	-0.0407147	0.107308	0.444159	1.34346	0.0636972
AC011043.1	0.0284127	0.568816	0.00470716	3.63015	-0.514603	-0.559459	0.0216262	0.0470599
AC011092.2	-0.0201177	1.29658	1.13413	-0.0619551	-0.226032	0.101149	0.195158	0.902149
AC011092.3	-0.0307135	0.690921	0.540849	-0.434116	0.516227	0.0864843	0.214901	0.2113
AC011246.1	0.041317	0.947878	0.177552	2.43256	-0.186796	1.48058	1.13048	-0.015851
AC011287.1	-0.489951	-1.33852	-0.0336548	1.4166	0.135964	-0.10048	0.450064	0.258676
AC011290.1	0.246369	0.0508	-0.376942	1.11329	0.434759	0.0646266	0.163569	-1.02404
AC011306.1	-0.59141	0.142789	0.44818	-0.036135	0.0933323	-1.02374	-0.23026	-0.0523219
AC011330.2	-0.327696	0.417722	0.4675	0.380838	-0.503774	0.13637	1.13333	-1.18883
AC011346.1	-0.153262	-2.00419	-0.746058	0.321509	-0.437856	-0.485331	0.531122	-1.02393
AC011351.1	-0.0925908	0.78438	0.873872	-0.246805	0.458567	0.991944	0.678979	1.703
AC011365.1	-0.521051	-0.146653	0.0255893	-0.241682	-0.452927	0.218656	0.324974	0.226881
AC011369.1	0.0271723	1.40466	1.31365	0.0954572	0.0119733	1.25082	1.27115	1.44846
AC011374.2	-0.184496	1.0809	0.704927	1.73263	0.127936	-0.196356	-0.0692912	0.00409904
AC011379.2	0.183585	1.21522	0.0313663	-1.73019	0.0147746	0.00664066	2.62293	0.79328
AC011405.1	0.0468264	1.51501	1.26577	1.09835	-0.700485	0.230508	1.32199	2.34937
AC011416.3	0.550762	0.108452	-0.0501967	0.310028	-1.09656	-0.174486	0.0350333	0.477721
AC011442.1	0.22372	0.828988	0.42374	0.198337	0.373586	1.22064	1.38763	0.466936
AC011443.1	0.077015	1.37867	0.694967	2.43221	-0.00382108	0.129905	0.186882	0.317697
AC011444.1	1.08175	-0.231151	-1.70322	0.793002	0.0898806	-0.301601	-0.0071804	-0.186802
AC011444.3	0.266102	1.91011	0.454029	-0.108111	0.0464146	0.940302	1.43698	-0.204462
AC011447.3	-0.236213	-0.0758408	-0.586785	0.867396	-0.34176	-0.607248	-0.0640241	-0.2586
AC011450.1	-0.0307278	-0.335115	-0.437103	2.06665	0.104513	0.0802817	0.727841	-0.215054
AC011451.3	0.425677	1.34534	0.215169	2.93938	0.0312034	-0.252923	-0.355139	-0.0635382
AC011455.6	-0.638988	0.897487	1.14278	2.04481	-0.355714	-0.0703764	1.46174	0.855036
AC011466.1	-0.170116	-0.179838	-0.0976773	0.323323	0.197227	0.686933	-0.0992797	-0.0482975
AC011466.3	0.106969	1.29622	0.477036	0.201339	-0.830564	-0.246861	0.73228	0.921494
AC011468.1	-0.00463685	0.486681	0.238604	1.27179	-0.387607	0.408186	0.517947	-0.153193
AC011468.5	0.443135	-1.07945	-1.38012	0.849449	0.723927	0.394744	-0.848879	-0.450915
AC011471.2	0.354427	1.69343	1.25024	-0.249888	0.181507	-0.0110273	-0.114193	0.246386
AC011474.1	-0.702292	-0.0553746	-0.149784	0.0941492	-0.37835	-1.35194	0.109047	-0.314489
AC011476.3	-0.161351	0.148842	-0.266172	-0.104047	-0.413634	0.342854	0.577361	0.0846264
AC011477.2	-0.313376	-0.630549	-0.226974	-0.0459922	0.715884	-0.0541003	0.407477	0.0480527
AC011477.9	-0.105311	1.02266	0.567017	1.56432	-0.15116	0.359675	0.272578	0.418761
AC011478.1	-0.170103	1.99252	1.74846	-0.774567	0.309235	-0.0667738	-0.195411	0.462681
AC011481.1	-0.193781	0.335917	0.267298	0.489116	0.0257532	-0.291666	-0.0142749	0.386507
AC011498.1	0.474354	0.304493	0.800255	0.0835762	-0.602724	1.68074	1.00397	0.285264
AC011503.1	-0.0436003	2.97777	0.458964	-0.417575	-0.93862	0.12003	0.171889	0.48979
AC011509.2	-0.504969	-0.681441	0.0945743	-0.692103	0.340394	0.183093	1.05619	1.63261
AC011586.1	0.137857	1.0139	0.581603	1.49681	0.288533	0.538138	0.0389433	0.488938
AC011586.2	0.317317	-0.129064	-0.0128765	1.21533	0.940752	-0.164398	-0.141185	0.219971
AC011595.1	-0.043306	1.11896	0.72403	1.0268	-0.114688	1.12019	0.657099	1.75285
AC011603.2	-0.595309	-0.564465	-0.349938	0.0799637	0.24224	0.861774	3.29835	0.407632
AC011625.1	-0.10545	0.91414	0.639164	-0.697811	-0.756692	0.374668	0.692417	1.07532
AC011676.3	-0.151149	0.0856131	0.282584	-0.00705377	0.115978	0.141225	0.657365	0.186392
AC011700.1	-0.141908	-0.164046	-0.336305	0.110841	0.123617	0.391959	-0.133196	-0.725619
AC011815.2	0.228576	0.252551	0.388355	0.487643	-0.267724	0.0695818	-0.0299147	-0.364679
AC011824.1	-0.828175	0.0140701	0.0394581	0.102886	-0.407376	-0.03971	0.0418695	-0.0290354
AC011824.2	-0.29048	1.06377	0.335739	0.370876	-0.762695	-0.599875	-0.0636016	-0.023947
AC011825.2	0.139708	1.51764	0.213269	0.151371	0.0677417	0.470337	0.562181	0.315412
AC011825.4	0.677133	0.571485	-0.441916	-0.0236492	0.295464	0.784677	-0.0345495	-0.829508
AC011900.1	-0.067356	1.08551	0.905569	0.280608	-1.14353	-0.0617479	0.295429	0.919005
AC011921.1	0.966706	-0.169396	-0.251429	0.663095	-0.222403	0.36377	-0.0738527	-0.695036
AC011933.4	0.0218048	1.12652	0.977484	0.452067	-1.05886	0.124063	1.10609	1.27552
AC011939.2	-0.0868178	0.588619	0.48126	0.478717	0.26851	-0.612909	-0.118236	-1.34528
AC011990.1	-0.523136	0.258199	0.196753	-0.20814	0.209188	0.0592151	-0.176776	-0.00768492
AC011997.1	-0.21778	0.014693	0.479593	0.158351	-0.0793055	0.706341	0.421253	0.311487
AC011997.2	-0.0892218	1.08195	0.483482	1.66393	-0.428061	1.01659	0.153773	0.302161
AC012020.1	-0.125041	-0.0865173	-0.0746093	-1.6886	0.0314855	-0.0765687	0.0533917	-0.140761
AC012063.1	0.02266	-1.43481	-1.55551	0.333164	0.360291	-1.62611	0.128126	-1.20027
AC012074.1	-0.134787	-0.165961	0.059889	-1.32376	-1.43012	-0.291176	0.223048	0.00898967
AC012076.1	-0.048356	0.637325	0.224121	1.75418	-0.0660011	-0.376379	1.18055	0.506108
AC012078.2	0.3078	-0.522657	-2.02924	-0.0500202	0.0548181	-1.52001	-1.13788	0.436405
AC012085.2	-0.0352036	1.27794	1.0772	0.549958	-0.588462	0.0369385	0.0914008	1.02399
AC012146.1	0.207566	0.0922295	-0.155124	0.132647	-0.0697909	1.16974	0.00812589	0.518671
AC012174.1	0.516348	0.748134	-0.0682115	-2.01638	-1.41318	-0.217789	0.342316	0.165329
AC012178.1	-0.922236	-0.167697	0.509468	0.294197	-0.954149	-2.53735	-0.669194	0.188102
AC012184.1	-0.0165447	1.47973	1.07349	-0.2439	-0.426151	-0.376355	0.0546959	0.55699
AC012184.3	0.280873	2.25898	0.999274	-1.71152	-0.00453556	0.136979	1.4658	1.53577
AC012184.4	0.108401	0.552605	-0.173007	0.021422	-0.216613	0.92826	1.49588	0.526482
AC012213.1	-0.775529	-0.259022	-0.12531	-0.736079	-0.0209686	-0.00616842	-0.1783	-0.391037
AC012213.4	-0.571351	1.10918	0.461435	-0.612686	0.160681	0.686159	-1.16653	-0.123606
AC012254.1	0.0216253	0.822357	0.303445	-0.277528	-1.82408	0.0157034	2.19337	0.928953
AC012291.3	-0.606435	0.0583139	-0.0262794	-1.46371	-1.91089	-0.345507	2.16883	0.143316
AC012306.2	1.0075	-0.133666	-0.0591958	0.182372	-0.0606095	1.83711	0.513209	-0.148956
AC012306.3	0.918297	0.595573	-0.121448	0.126018	0.774127	-0.907471	-0.45025	0.401537
AC012313.1	0.142057	0.73297	0.370789	6.00076	0.47475	-0.685498	-0.889231	-0.682818
AC012313.6	-0.00374963	0.540563	0.390971	2.06457	-1.88129	0.0609088	0.592908	-0.511802
AC012313.8	-0.247192	-4.56614	-0.240444	0.432577	0.29696	0.466532	-0.231247	-0.216471
AC012354.1	-0.0974963	0.659048	-0.635808	-0.381679	0.133475	-0.367957	1.23757	0.760998
AC012358.3	0.214069	1.62808	0.615731	0.47454	-0.301006	0.0518938	2.05463	0.758735
AC012360.1	0.0434235	0.426502	0.520115	-0.934974	-1.59548	-0.268483	-0.293177	-0.00932392
AC012360.3	-0.434874	1.38396	2.2292	0.179328	0.0639221	-0.109142	-0.485863	-1.0061
AC012363.1	-0.301355	0.194882	0.0961647	2.32814	-0.239638	-0.0384557	-0.251662	0.167388
AC012368.1	-0.0576759	-0.886286	-0.336713	0.209136	0.29243	0.587842	0.422927	-0.195977
AC012370.2	-0.137504	0.680717	1.37189	0.229741	-1.29512	1.70592	3.34077	0.451389
AC012404.1	-0.0345744	1.15565	1.1561	1.61593	-0.0746029	-0.0128735	0.272422	1.07205
AC012404.2	-0.125936	0.7337	0.855324	0.871661	0.067604	-0.308939	0.421743	0.344014
AC012409.2	0.026155	1.06509	0.199725	0.0496137	-0.0817985	-1.86158	-1.00653	0.0714662
AC012414.5	-1.13513	-0.961486	0.466092	4.60971	0.611171	-0.258053	0.172328	-0.633816
AC012442.2	-0.517705	0.344772	0.749974	0.195728	-0.768924	0.226573	1.21402	0.47847
AC012447.1	-0.038374	1.00935	0.669895	0.42167	0.577041	2.62768	0.140344	1.27791
AC012459.1	0.393079	0.897017	0.166683	0.00758359	0.00587826	0.298965	0.342446	0.998297
AC012464.1	-0.0981781	1.49383	1.35743	1.29739	-1.06082	-0.080435	0.276075	1.16572
AC012467.2	-0.278151	-1.0601	0.484879	-0.292822	-0.536708	-0.00925659	-0.177924	-0.0739016
AC012485.1	-0.165697	0.438458	0.620166	0.132851	0.598268	0.428652	-0.18875	0.16359
AC012494.1	-0.817761	0.324728	0.000434301	1.60122	0.00235485	0.0439041	0.0482491	0.333482
AC012501.2	-0.430492	-0.215597	-0.00799063	1.84996	0.515028	0.262521	0.0101108	0.0517153
AC012508.1	0.135999	0.60247	0.487786	0.166134	1.06182	0.241439	-0.510751	-0.213998
AC012508.2	0.0107141	0.575634	0.552074	-0.783923	0.971055	0.0121632	-0.129471	-0.0912629
AC012535.1	0.100682	0.347883	-0.215022	-0.958978	-0.470559	0.413717	3.01611	1.6458
AC012574.1	-0.104434	0.500181	0.530731	-0.293534	-0.969186	-0.369022	-0.118931	-0.293151
AC012613.1	-0.74449	-0.544699	-0.549337	0.644967	-0.575364	0.402736	0.112195	-1.7478
AC012615.1	1.04483	-0.315485	-1.12998	1.14304	-0.0534681	-0.168636	-0.661308	-0.468858
AC012636.1	0.419639	0.768652	0.844366	-0.0274059	0.109358	0.189034	0.540609	0.204606
AC012640.1	1.44487	1.06532	0.330057	0.469367	0.320827	0.713131	-0.179884	-0.0742215
AC012640.2	1.1201	0.390288	-0.010623	0.302675	-0.0832239	0.369211	-0.296312	0.0311981
AC012645.1	1.71346	-0.112067	-0.943732	0.0900538	0.053842	0.0414522	-0.207765	-0.23886
AC013267.2	0.053506	1.9227	0.948895	0.130178	-0.368284	-0.977253	0.842747	0.416503
AC013287.1	-1.62889	-1.42816	-0.161314	0.26587	-0.229992	0.826173	0.210478	0.0295171
AC013391.2	-0.482346	0.437239	0.103227	0.12056	0.169107	-0.640369	0.480755	0.0256397
AC013468.1	-0.203183	1.02198	1.9332	-0.31143	-0.0238261	-0.27205	-0.257536	0.917403
AC013472.1	-0.0348262	0.328489	0.0140634	0.191742	0.0811699	0.641408	0.460664	1.94919
AC013472.2	0.037793	1.23802	0.578219	4.75509	-0.297009	-0.456938	-0.0526449	0.495858
AC013553.4	0.72847	0.319884	0.311324	-0.119672	-0.00295426	0.228463	-0.0621946	0.316171
AC013562.1	-0.3045	0.334186	0.913292	-1.20328	-0.707704	-0.641348	-0.0766966	-0.341027
AC013640.1	0.0283513	1.67492	1.30336	1.89078	-2.01971	0.0727407	0.196571	0.195877
AC013643.2	0.0226872	0.703668	0.24339	-0.0133692	-1.1968	0.202672	0.658454	0.167205
AC013652.1	-1.04193	-0.169381	-0.201429	0.678593	-0.410094	1.63558	1.19164	0.0870488
AC013731.1	0.0380897	0.207412	0.752896	0.449063	0.0687941	-0.793238	-0.406112	0.126978
AC013733.1	0.273335	2.33115	1.09046	-0.200187	-0.182687	-0.170211	1.30842	1.60439
AC013733.2	0.276828	0.589677	0.648027	0.626712	0.166635	0.958798	0.976107	0.169373
AC015563.1	0.225584	0.017926	-0.635318	0.821218	0.139802	0.223308	2.07826	0.545405
AC015795.1	0.112593	1.64631	0.775835	0.179903	-0.280105	0.783035	0.989194	1.53638
AC015802.3	0.210232	-1.08328	-0.38947	-0.195856	0.118752	1.87326	-0.0829958	-0.0644809
AC015802.4	-0.171074	0.0299096	-0.260408	1.05239	0.521767	0.029096	-0.271947	0.368098
AC015802.5	-0.446262	-1.34691	0.0961033	0.392865	0.151992	0.347264	0.0919167	0.242642
AC015802.6	0.640957	-0.0304144	-0.421446	-1.53126	0.471319	1.21064	1.32648	0.0235886
AC015813.1	0.456124	-1.24799	-0.902098	1.41907	0.701864	0.154972	0.406044	0.10972
AC015845.1	0.0684576	1.09565	0.515402	1.0529	-0.00837194	0.188939	0.454731	1.06927
AC015845.2	-0.142481	-3.15979	-0.352317	1.04139	-0.103956	1.30259	0.0548423	-0.212437
AC015849.3	-0.0605614	1.3395	1.15704	0.652902	0.0719893	-0.25109	0.310417	0.0399889
AC015849.4	-0.482417	0.24007	0.542101	0.630601	-0.101832	-1.29988	-0.257866	0.0998765
AC015853.2	-0.268919	0.459437	0.493342	-0.0367509	0.540305	2.70341	3.24529	1.65502
AC015853.3	0.0028334	1.19856	0.686831	-0.151687	-0.784095	0.564094	2.00936	1.03066
AC015871.1	-1.25217	0.35135	0.786456	-1.24189	0.127955	0.221052	-0.17939	0.048096
AC015871.4	0.257417	-0.451014	-0.118186	4.55985	0.451184	0.583508	0.2278	-0.00799138
AC015871.7	-0.00258606	0.613637	0.415985	1.18849	-0.853435	-0.0172383	0.146501	-0.242273
AC015878.1	-0.00630657	1.61655	0.927181	1.81046	-2.3861	0.00515717	0.822693	0.499798
AC015909.2	0.0592952	-2.05799	-0.439227	0.666582	0.187925	0.0811928	-0.626719	-0.333543
AC015912.3	0.309021	-0.525397	-0.459255	0.393828	1.63392	0.243739	-0.216711	0.0260777
AC015917.2	4.21806	0.0501344	-1.75683	-0.0291079	0.10183	0.406902	-0.183969	0.00213407
AC015923.1	-0.0183055	1.09931	0.997235	-0.0525033	-0.543006	0.307472	0.793875	0.854649
AC015943.1	-0.161967	-1.18647	-2.6721	0.0592816	-0.529287	-0.074863	3.4839	-0.422813
AC015961.2	-0.6461	-0.736551	-1.28239	0.345999	-0.285272	-1.09887	0.54852	0.144838
AC015967.1	0.0748039	1.18014	0.865829	-0.15843	0.625654	1.06911	0.0507594	1.04351
AC015971.1	0.212366	2.18645	1.04834	0.239985	-0.589298	0.472167	1.58418	0.370294
AC015982.2	0.36734	-0.886215	-0.174456	-0.409587	-0.00746517	0.508943	-0.206474	-0.196054
AC015983.2	-1.17028	-1.21664	-0.0101604	0.677471	0.0275871	0.455102	0.0719957	-0.457063
AC015987.1	0.575775	1.79647	1.45803	-0.205902	-0.15494	2.16562	1.5568	0.740359
AC016042.1	0.0347161	1.4894	1.02108	0.447603	-1.17266	0.110537	0.331073	0.720504
AC016065.1	1.00317	0.261543	-0.0241411	-0.0265806	-0.532816	0.085711	-0.398183	-0.0862204
AC016168.2	0.0652167	2.17523	0.263516	-1.53166	0.210905	0.58372	-0.0859928	-0.142344
AC016168.4	0.266703	-0.752221	-0.577395	-0.0485894	0.633899	1.02271	-0.0291879	-0.866179
AC016382.1	0.207757	2.77695	0.921862	-0.0565802	-0.839925	0.0989445	0.0649727	1.44137
AC016394.1	0.495617	-0.11316	0.110864	0.454218	-0.523913	0.477134	-0.566269	-0.932465
AC016493.1	-0.0386267	1.11839	0.67481	0.501923	0.0499798	0.146352	1.44607	0.53954
AC016575.1	-0.0152677	0.206959	-0.0895476	0.905319	0.20864	-0.379208	0.129786	-0.378268
AC016588.2	-0.145735	-0.262584	0.282303	0.973584	0.0901348	0.785548	-0.414991	0.126787
AC016590.1	0.0630087	1.28753	1.5023	0.154049	-0.474664	0.455779	0.961411	0.58231
AC016596.1	-0.0456286	-1.21607	-0.280015	-0.884225	0.255674	0.13219	0.0245826	-0.107535
AC016597.1	-0.05117	0.699437	0.794307	-0.54171	-0.0158367	0.527649	0.222191	0.324892
AC016642.1	-0.00266588	1.11274	1.10175	0.219216	-0.258967	1.02951	0.562115	1.13547
AC016644.1	-0.00957127	1.18102	0.575553	0.530126	-0.779904	0.00677888	-0.0180043	0.594068
AC016650.1	-0.099437	0.842234	0.746471	-0.319415	-0.693818	-0.050702	0.394263	0.595704
AC016705.2	-0.10302	-0.161595	-0.74765	-0.0479781	-0.69475	-1.39435	0.650979	0.56922
AC016716.2	-0.101975	1.66676	1.20116	1.42355	-1.02116	-0.228609	0.22183	0.0190011
AC016717.2	-0.288971	-0.71287	0.004251	0.463805	0.949022	-1.51763	-1.46582	-0.469523
AC016721.1	-0.0667033	0.916767	0.658697	1.09959	0.05985	-0.0229169	0.058755	0.558939
AC016722.2	0.131617	0.963505	0.760298	0.340674	-0.214565	0.451689	0.533812	0.2594
AC016723.1	-0.131632	0.987521	0.487358	-0.391099	-0.174912	0.160306	0.200514	0.51865
AC016727.1	-0.0225109	-0.117382	-0.476617	-0.307183	0.168892	2.5656	0.203983	-0.6733
AC016745.1	0.0393991	1.38012	-0.00782805	1.44183	0.0597301	2.07208	1.10115	0.82185
AC016745.2	-0.00826685	0.605715	0.203461	-0.0513599	0.468376	0.858761	1.19585	0.685617
AC016747.1	0.0310447	0.0792391	0.209533	-0.320925	-0.224488	0.578785	-0.481111	0.130551
AC016747.2	-0.183756	1.31565	1.00782	0.643294	-0.664956	1.54819	2.02719	0.265054
AC016766.1	-0.580803	-0.414022	-0.266472	0.361249	0.189583	-0.159956	-0.585772	0.21804
AC016773.1	0.424904	2.17312	0.773912	0.0622226	-1.08818	-0.0905841	-0.178362	0.00516224
AC016821.1	0.271733	2.22297	0.456085	-0.226911	-0.282169	-0.224285	-0.302993	0.146051
AC016831.1	1.474	-0.258005	-0.463759	-0.417954	-0.0580709	-0.142357	-0.391824	-1.42915
AC016831.5	0.0933748	0.225126	0.337804	3.04632	0.537812	-0.299015	-0.166213	-1.6547
AC016831.7	0.451296	-1.33458	-0.299349	0.411915	1.33193	-0.0412081	-0.165395	-1.05069
AC016866.2	0.00143839	1.19394	0.604573	2.43722	-0.148296	-0.504978	-1.20962	0.5541
AC016876.1	0.0348068	1.0869	2.14736	0.243779	0.241518	0.544829	-0.445827	0.013654
AC016907.2	-0.0065284	-1.87243	-1.62567	1.73204	0.173962	-0.555699	1.23644	-1.03668
AC016910.1	0.0221041	1.0201	0.644893	-0.378335	-0.239981	-0.796171	0.532138	0.371701
AC016931.1	1.10881	0.0538563	-0.363959	0.208061	-0.0199921	-0.0687806	0.595925	0.286862
AC016949.1	-0.890143	-0.0503394	0.323557	0.110434	-0.373588	-0.406545	0.0801522	0.0788412
AC016994.1	-0.0417106	0.446428	0.0796661	0.748763	-0.245504	1.15568	0.288971	-0.245426
AC017028.1	0.28589	0.731533	0.448415	-3.57637	-0.539929	1.9472	0.740738	0.731412
AC017050.1	-0.024728	-0.0144867	0.340941	0.540363	0.156138	0.249277	-0.821714	-1.41141
AC017071.1	-0.228679	-0.597372	-0.194323	0.199677	-0.00796575	-1.3044	-0.63467	-2.40525
AC017074.1	0.0961093	0.0106403	0.481657	-0.619051	-0.834986	-0.557703	-0.218894	-0.705938
AC017083.1	0.130594	-0.159573	0.588394	0.764229	0.937732	1.2607	-0.706276	-0.611453
AC017100.1	1.12666	0.588229	0.0235669	-0.774189	0.731633	1.26416	0.829886	-0.21382
AC017101.1	0.0148384	1.62397	0.699103	1.32917	0.6261	0.252808	0.792837	0.202445
AC018362.1	0.10093	-0.163629	0.0739022	1.84665	0.190686	0.0499763	-0.13862	-0.00670688
AC018450.1	0.124254	0.174642	0.1005	2.82266	0.362682	-1.02193	0.64458	0.276063
AC018462.1	-0.0233139	1.61724	0.873387	0.228844	-0.373213	0.824442	0.442684	0.935643
AC018464.1	0.139761	1.704	0.0405374	-0.597748	-0.212494	-0.68786	0.291945	0.79994
AC018511.2	-0.0579918	1.32978	0.736823	3.09963	0.0994125	0.687061	0.698657	1.59346
AC018521.5	0.0394584	1.2916	0.597977	-0.456636	-0.131423	-0.00543903	0.564464	0.114443
AC018557.1	-0.185689	0.370027	-0.0158205	1.67453	-1.61148	-0.197317	0.370222	0.411829
AC018557.3	-0.0488691	1.13315	1.03633	0.646797	0.530857	-0.0449315	0.276302	1.35164
AC018616.1	-0.0637861	2.79914	0.83523	0.286365	-0.284518	0.335783	0.253328	-0.556603
AC018628.2	-0.0778214	1.48126	1.24236	0.07165	-0.0174818	-0.0989889	0.218906	0.561913
AC018638.6	0.377026	-0.00820793	-0.00417935	-0.263413	-1.67599	-0.121634	0.287155	0.317755
AC018638.7	-0.0384072	1.06041	0.514388	1.10827	-0.168384	1.06619	0.726862	0.000594564
AC018643.1	-0.00647742	1.10292	0.822261	0.28974	-1.46107	-0.371673	0.234812	2.15953
AC018645.3	-0.0261981	0.18016	0.237938	0.436213	0.472786	-0.285016	-0.49031	-0.0249843
AC018647.1	0.0466614	2.75403	0.945674	0.186464	-0.586794	1.56976	1.41039	0.401799
AC018647.2	0.481416	-0.208669	-0.0890001	-0.0991072	0.0518103	0.995158	-0.0551954	-0.470616
AC018647.3	-0.531751	-0.187455	0.495413	0.570483	-0.119592	-0.0940068	0.322955	0.270039
AC018648.1	-0.253012	0.539914	0.177746	-0.0590363	-1.39592	-0.00369082	0.857053	0.375198
AC018653.3	0.592435	0.192456	-0.0630767	0.0178418	-0.192532	0.191558	0.543298	-0.337964
AC018653.4	-0.109353	1.38606	0.416604	2.30476	-0.71266	-0.474348	0.260012	0.634249
AC018680.1	-1.04846	-1.85795	-1.14223	0.561201	-0.395637	0.139647	-0.43731	-0.0421306
AC018682.1	0.0573487	1.15017	0.8646	0.78159	0.342546	-0.160779	-0.0081754	0.331908
AC018695.2	-0.13935	0.965704	1.00059	0.0751811	-0.0631094	0.127058	0.0112113	-0.175581
AC018695.6	-0.426047	-0.447016	0.118337	-0.0141613	-1.26098	0.363156	0.00941588	0.0254893
AC018695.9	-0.187413	0.641429	0.839327	0.144998	-1.01229	-0.160109	-0.0376164	-0.00630147
AC018697.1	-1.17115	-1.1541	-0.0856221	0.0244179	-0.322552	-0.512063	0.0602372	0.166306
AC018742.1	-0.10812	0.0520301	2.46487	0.343784	0.203885	0.854548	0.274453	0.521155
AC018752.1	0.0893176	2.02376	1.2253	0.00981367	-0.242232	0.812681	0.0318605	1.2868
AC018754.1	-0.99219	-0.590144	-0.263412	-0.579646	0.970614	0.0274202	-0.0738163	-0.243751
AC018761.2	-0.0421657	0.760768	0.0487468	0.420145	-0.0221093	0.594932	0.1701	0.302867
AC018797.3	-0.004907	0.669971	0.680755	0.375947	-1.19975	-0.389269	-0.456689	0.00721545
AC018809.2	-0.109936	0.952404	0.216945	1.1834	0.119991	0.203429	0.239985	0.716494
AC018816.1	0.109769	-0.745096	-0.0574811	-0.292145	0.218779	-0.363711	0.140079	0.783548
AC018832.1	-0.0709241	1.14009	0.836173	0.0131504	-0.841372	-0.353625	0.432516	0.555061
AC018845.3	-0.91375	-1.3463	-0.0754153	-0.642697	0.0660081	0.595354	0.269988	0.00998811
AC018878.1	0.041398	1.2086	1.12954	-0.516406	-0.355334	1.63877	0.34871	-0.306767
AC019068.1	-0.0483217	1.84268	0.970253	-0.278642	-1.21376	0.202237	4.51741	0.876371
AC019077.1	-0.00274946	0.582917	0.554614	-0.547734	0.181673	0.0923567	-0.327148	-0.0801426
AC019080.1	-0.239414	-0.0126865	-0.0850521	0.323011	-0.193197	0.273756	0.717538	-0.238928
AC019080.5	-0.0743406	0.844205	0.151149	0.186427	-0.307649	0.289876	1.18194	0.47338
AC019117.1	0.0797317	1.24389	0.805118	-2.19431	0.0821688	-0.382143	0.0601164	0.147524
AC019117.2	0.869204	0.142258	0.30738	0.187361	0.0745256	-0.385863	-0.0830732	-0.736553
AC019118.2	-0.434091	-0.536566	0.428101	-0.0766043	-0.797941	1.44626	0.168014	0.139065
AC019130.1	0.0215753	1.30134	0.984759	-0.0571288	-2.29843	1.01056	1.72057	0.582425
AC019131.1	-0.0523931	-1.06753	-1.21258	1.06571	-0.0142043	-1.7213	-0.741839	-0.835183
AC019155.2	0.028927	0.433047	-0.0570785	0.840368	-0.139612	-0.908032	-0.440783	0.484398
AC019163.1	-0.0800451	1.25635	1.06371	-0.809712	0.177396	0.88851	0.35855	0.387469
AC019171.1	0.466982	0.160885	0.185472	-0.164851	-0.370915	0.995793	-0.320164	-1.0912
AC019186.1	-1.21158	-3.95109	0.054966	1.07417	-0.0115845	-0.145932	0.00503744	0.160847
AC019197.1	-2.32903	-1.16922	-0.0154773	-0.0345755	-2.75475	-1.10647	-0.607474	0.0203739
AC019205.1	-0.370955	-0.520777	-0.508433	0.0779605	0.0209209	0.110903	1.37725	0.283861
AC019257.1	0.447965	0.602611	-0.055406	0.246931	0.302637	-0.539442	0.133945	-0.447796
AC020558.1	0.6098	-0.243735	-0.0469655	0.818198	-0.130932	1.16047	0.14808	-0.0341813
AC020584.1	-0.468574	0.0193345	-0.0253004	-0.155858	-0.166849	-0.177084	0.217158	0.467534
AC020594.1	0.367233	0.0834101	-0.126637	-2.43567	-0.259292	0.269252	1.92251	-0.187303
AC020611.2	-0.266313	0.00985455	-0.138473	1.22957	-0.232755	0.439383	-0.018672	-0.89613
AC020661.2	0.0603603	1.56318	2.0742	0.819114	-0.531928	0.0236076	-0.192845	0.372552
AC020661.3	-0.0893418	1.01176	0.781549	1.18355	0.126199	1.11099	0.575086	0.521006
AC020663.3	-0.0664618	-0.570508	-0.546099	0.00445049	-0.146346	-0.468781	-0.588347	0.11047
AC020687.1	-3.52375	0.104592	1.54713	-0.57733	-0.0430843	0.00820894	0.282895	0.317178
AC020741.1	-0.200964	-0.784315	-0.283657	0.788601	-0.342161	0.654245	1.60828	0.901341
AC020765.2	0.201534	-0.305082	0.121063	1.10421	0.256759	1.37404	-0.0562637	-2.11994
AC020779.2	0.0461592	1.34873	0.282667	-0.22218	-0.521955	0.835603	2.91102	0.72096
AC020892.1	-0.00446283	1.04229	0.459083	0.433233	-1.39848	-0.114377	0.375353	-0.0357545
AC020892.2	-0.0487878	1.39491	1.82786	0.222481	-0.0438664	0.0210719	0.520542	0.352075
AC020908.1	0.195656	0.660419	0.961838	-0.0733081	-0.254883	0.0969609	0.834565	0.341688
AC020909.2	-1.01318	0.210776	0.295938	-0.282431	-1.30185	-0.514001	-0.10866	-0.819955
AC020910.5	0.0955942	0.727281	0.560009	0.0448122	0.00381013	0.73098	-0.19928	-0.446381
AC020911.2	-0.820218	-0.359688	0.068497	0.210244	-0.449598	-0.290666	-0.889846	-0.476949
AC020913.1	0.000956234	1.75717	0.95759	0.100875	0.0798841	0.86638	0.252163	0.144803
AC020915.2	0.0298764	0.549595	0.348822	-0.0986006	-1.10827	0.321546	2.1907	0.611952
AC020917.2	-0.0143909	0.916408	0.458593	2.52283	0.164392	7.16922e-05	0.0773979	0.809857
AC020928.1	-0.549077	-0.638197	-0.26168	-3.41416	0.622507	1.50623	-1.32914	-0.0347617
AC020978.3	0.198768	1.60937	0.871995	0.64108	0.0392516	1.05326	0.419492	-0.439447
AC021054.1	-0.101853	0.0902793	0.130923	0.0427471	-0.0370895	0.214799	0.328589	0.247412
AC021086.1	0.189124	-0.982242	-1.70955	0.596448	-1.32297	0.322579	1.14788	-0.799143
AC021092.1	0.0982714	0.596111	1.02114	0.200202	0.625201	0.297293	-0.0812809	-0.0174127
AC021097.1	0.173107	1.59337	0.922957	0.748883	-0.063359	1.40404	0.85742	0.0858417
AC021127.1	-0.191982	-0.887414	-0.285772	1.59074	1.57445	-0.288909	0.419365	0.0182222
AC021148.2	-0.609339	0.260557	0.735779	-0.0698002	-0.440319	0.175105	0.255852	-0.310744
AC021205.3	0.199075	-1.16047	-0.322817	0.581552	-0.33418	-0.143579	-0.162302	-0.211847
AC021231.1	-0.835501	-0.138169	1.03045	0.0357799	0.0878485	0.278515	2.33054	0.210013
AC021321.1	-0.136285	0.694674	0.74256	0.404792	-0.374884	-0.214124	-0.163908	-0.123979
AC021351.1	-0.179876	1.19856	1.86828	-0.400656	-0.409438	-0.0672864	-0.378605	-0.0374875
AC021491.1	-0.372038	0.663237	0.860167	0.298562	-0.0527135	1.9933	1.65436	0.0234897
AC021504.1	-1.77456	-0.525899	0.232617	0.0680541	0.830949	-0.589437	-0.298043	0.653572
AC021683.2	-0.0249073	-0.423594	-0.164059	-3.46124	0.432689	-0.134845	-0.63122	1.2417
AC021683.3	-0.0685444	0.232117	-0.144326	-0.455254	0.15487	0.0599743	0.224872	1.09707
AC021683.5	-1.61505	-0.0338129	0.355891	0.423673	0.521341	-0.174219	-0.429311	0.151482
AC021723.2	-0.419049	-2.80474	-0.882295	-0.00945221	-0.289964	1.57663	0.218589	-0.842293
AC021752.1	0.90773	0.233549	0.0379296	1.90519	0.844465	-1.07714	-0.21881	-0.883934
AC021851.1	-0.675996	-0.157272	0.73158	0.078396	-0.772887	-1.30488	-0.276851	-0.31273
AC021851.2	-3.67173	-1.33314	-0.995291	1.44182	0.0925163	-0.102026	-0.197927	-1.36407
AC021915.1	0.00866067	1.10337	0.509567	0.712658	-0.490118	0.0287984	0.78039	0.391409
AC021915.2	0.0370827	1.59062	0.75449	0.621274	-0.639917	-0.132014	0.246665	0.371483
AC022031.2	-1.21788	-0.639755	-1.55442	-0.259736	-0.189897	0.0481794	1.19136	0.155127
AC022075.1	0.384349	1.7669	0.906738	-0.00121497	-0.0904704	0.334734	0.0289645	0.894717
AC022087.1	-0.302276	0.980305	1.40589	-0.0439053	-0.798025	-0.12273	-0.431383	0.130722
AC022098.1	-0.0578949	1.06867	0.714024	-0.0528696	0.238003	0.217824	0.275529	1.75
AC022126.1	-0.16078	0.267432	0.181696	0.130088	0.54099	-0.184994	-0.160543	-0.737364
AC022137.4	0.315615	3.21968	2.92959	0.469067	-1.14355	0.0519769	-0.272027	0.0939772
AC022146.2	-0.151555	1.53756	1.06741	-0.282976	-0.755415	0.942527	3.99319	1.25592
AC022148.1	-0.225116	-1.77775	0.0328705	-0.859665	0.515114	0.281899	-0.426308	0.623682
AC022154.1	-0.278566	-0.381345	0.173349	-0.0608735	0.219493	-3.08149	-0.760005	0.378392
AC022167.2	-0.216143	-0.545676	-0.808004	5.97719	0.289349	2.34638	1.28663	-0.161619
AC022182.1	0.252272	0.195409	0.231579	-3.40737	-0.367371	-0.626312	1.89289	0.856803
AC022210.2	-0.0970765	1.50682	1.09442	-0.619368	-0.458898	-0.0866484	0.255645	0.577847
AC022217.3	-0.104753	0.699894	0.939031	-0.384704	1.65116	0.49303	0.466002	0.040016
AC022272.1	-0.0102904	0.86181	0.76474	-0.124363	-1.09943	-0.24361	0.20079	-0.00792199
AC022306.2	1.71836	1.60448	0.325278	0.501867	-0.868447	-0.125481	0.0714263	-0.113788
AC022364.1	0.190574	-0.627154	-0.191008	0.600193	0.0649709	2.1842	0.638339	-0.423736
AC022382.1	0.369496	0.202785	0.106135	0.287367	0.139574	1.01354	0.0327997	0.076308
AC022395.1	-0.0704724	0.867166	0.73211	0.452674	-0.204266	-0.0964213	0.197285	1.16958
AC022400.2	-0.126	1.23778	0.387145	-2.38959	0.264403	0.357321	0.14032	1.24056
AC022400.4	-0.358487	0.361806	0.0800862	-0.466909	-0.319962	0.273659	0.415659	0.0137385
AC022424.1	-0.241572	-0.150839	0.935364	-0.871078	-0.102058	-0.32897	0.34472	0.0986133
AC022433.1	0.120737	1.25065	0.249486	0.470424	-1.2144	0.27614	3.96424	1.09444
AC022469.1	-0.152638	-0.36344	-0.0152637	-0.0484986	-0.13754	-0.171892	-0.660071	-1.09271
AC022469.2	-0.0854289	1.02561	0.763998	-0.919766	0.0178417	-0.337791	0.466984	0.442974
AC022509.3	0.288792	-0.769524	-0.323299	0.27703	0.725152	0.435891	-0.24839	-0.062975
AC022523.1	-1.0039	0.409695	3.89303	0.707756	0.141432	0.770912	0.27732	-0.573744
AC022540.1	-0.0387835	0.912114	0.451629	1.13268	-0.167039	-0.267892	0.270547	0.719475
AC022558.2	-0.0634792	1.34274	1.39983	-0.103969	-0.546064	0.122969	1.38704	1.29436
AC022601.1	-0.122037	0.134638	0.407655	-0.0199605	-0.106053	0.662282	0.303819	1.78874
AC022613.2	-0.148718	0.399023	0.116343	0.0650315	-0.284945	0.637898	0.511208	1.59902
AC022613.3	0.067177	0.656949	1.33207	-1.55179	0.223005	-1.42042	-0.0644283	0.459113
AC022655.1	-0.676552	0.0315487	0.0403179	1.02977	0.82162	0.579882	0.992391	0.121262
AC022679.2	-0.00391628	1.22542	1.15285	-0.650564	-0.263093	-0.203872	0.249463	2.0527
AC022762.1	-0.269297	0.420417	0.399788	1.13712	-2.69487	0.00615619	1.28485	0.359924
AC022762.2	0.169653	-0.190777	-0.0116494	0.711737	0.169453	1.95722	0.132308	-0.352352
AC022784.1	-0.142857	-1.26459	-0.72224	-0.147638	0.774603	0.17344	0.0309296	-0.657252
AC022784.5	0.0990456	0.403376	-0.232274	1.26371	0.318881	-0.641373	-1.08861	-0.027584
AC022809.1	-0.189258	0.922392	0.723388	2.28611	-0.300623	0.499632	-0.014131	-0.499732
AC022858.1	-0.0542017	-1.24527	-1.31973	-0.434899	-2.19463	-0.222393	0.122082	0.146242
AC022872.1	-0.0297156	0.766298	0.417258	0.401355	-0.375788	-0.258818	0.182804	0.18902
AC022893.1	-0.0928747	-0.690588	-0.358444	-0.0517219	-0.00364222	0.447251	0.24592	0.333261
AC022893.2	-0.0554146	-0.0240139	0.202167	-0.978135	0.117833	-1.0911	-1.50503	0.0324945
AC022898.2	-0.00777851	-1.76987	-0.356002	0.52936	0.0720323	-2.54205	-0.408459	-0.0353475
AC022915.2	0.0163951	-0.590685	-0.362643	1.19345	-1.14182	-0.0196467	1.41155	0.447746
AC022916.1	0.363784	-0.217306	-0.438887	0.157876	-1.51692	-0.726689	0.0220417	-0.269601
AC022960.1	0.182206	1.41567	0.73809	-1.23697	-1.45799	-0.00888212	-0.102617	0.451438
AC022973.3	-0.200413	1.20757	1.15754	-4.46652	-0.0735973	0.0384696	-0.280109	0.709284
AC022973.4	0.0068706	1.03852	0.589497	2.61897	-0.0464322	-0.195562	0.0277388	0.238104
AC023051.1	-0.0588954	0.958512	0.252799	0.912171	1.34199	-0.0249756	-1.04311	-0.0182335
AC023095.1	0.323237	-1.24886	-0.358153	-0.53432	0.0970733	-0.252568	0.853804	0.0900436
AC023136.1	-0.0476232	1.1631	0.818032	0.717775	-1.14807	0.20625	0.622564	0.15974
AC023154.1	0.0168581	1.16141	0.133867	0.887233	-0.996505	0.399631	0.52112	0.13158
AC023157.3	0.381817	-0.505971	-0.458683	0.307475	0.191994	1.13672	0.0333235	-0.499641
AC023282.1	-0.10857	0.603277	0.717571	0.773059	-0.632177	-0.201398	1.09182	0.866912
AC023283.1	0.0634495	0.960643	1.49336	0.15679	0.30288	0.111402	-0.13837	0.580344
AC023355.1	-0.129038	0.279768	-0.0671807	-0.210681	-0.280983	0.435262	0.777098	-0.152973
AC023385.1	-0.113291	0.614938	0.175318	0.337156	-1.18899	-0.0306298	0.132185	1.01584
AC023389.1	-0.011104	2.00662	1.34606	0.53528	-0.112627	0.104206	1.00617	1.28139
AC023421.2	-0.210964	-1.44275	-0.216122	-0.0272817	-0.96467	-0.0431822	1.29021	-0.196476
AC023424.3	0.0434086	1.41384	1.14261	0.681915	-1.15963	2.00493	1.28642	0.980587
AC023480.1	0.29743	1.6992	-0.191767	1.90959	-0.639633	-0.560148	2.82921	0.489095
AC023481.1	-0.341337	-0.100888	0.00659591	1.1126	0.387849	0.573068	0.23953	-0.461249
AC023494.1	0.074213	0.96627	0.965387	0.0780606	-0.142973	-0.925342	-0.232605	0.422401
AC023509.3	0.665188	0.0570336	-0.248212	0.178035	0.115998	1.81695	0.434087	0.24153
AC023509.6	-0.011435	1.56164	1.34622	-0.293189	-1.08657	0.106512	0.483013	0.74968
AC023590.1	-0.0333113	1.03397	0.892531	0.908827	-0.0525012	-0.314681	-0.155764	0.299353
AC023593.1	-0.227032	-0.41755	-0.465359	1.15071	0.292951	0.239001	0.163146	-0.0144839
AC023632.2	0.00110941	-0.768355	-0.401292	-0.123212	0.0155069	-0.0930275	-0.25416	-1.3126
AC023790.2	0.740252	0.473819	-0.267145	0.0535884	0.607772	-0.0439443	0.102237	0.239877
AC023796.2	0.094684	1.51285	0.573675	1.49869	-0.261767	0.146085	0.615227	0.473111
AC023830.1	-0.26688	0.705449	1.17121	-1.84043	-0.00306384	-0.270932	-0.0678596	0.409043
AC023855.1	-0.167127	0.711079	0.918779	-0.193712	0.170858	0.243087	0.153195	0.194394
AC023886.1	0.0429383	1.91088	0.770956	0.49168	-0.35263	2.55715	1.25457	0.463029
AC023905.1	-0.379938	0.0524325	-0.416721	0.276459	-0.727303	-0.0244262	0.118068	0.0540873
AC023906.3	-0.0514222	1.33551	0.627183	0.404098	-0.4547	1.04537	0.66482	1.77821
AC023906.4	0.0655003	1.37666	1.18902	1.58486	1.11235	0.262766	1.22949	0.200933
AC023906.5	-0.0990713	0.818848	0.743341	0.481555	0.157499	1.32568	0.229894	0.683087
AC023908.3	-0.261609	0.0385219	0.100609	-0.0529629	-0.425443	0.524321	-0.0633846	-0.869443
AC023983.1	-0.00111825	1.43968	0.715287	0.225678	0.262391	-0.288637	-0.260898	0.378979
AC024060.2	-0.0487182	1.2867	0.913446	0.573508	-0.315648	1.64923	0.903416	0.686746
AC024075.1	-0.378145	0.155181	1.17477	0.524151	-0.0441105	0.196937	0.681731	0.222858
AC024075.2	-0.852877	0.07916	-0.125568	-0.029672	-0.0521328	0.0940996	0.740293	0.0439427
AC024075.3	-0.0907478	1.21515	1.02693	-0.434662	-0.390462	0.0941671	0.683943	0.810056
AC024145.1	0.010011	0.1252	-1.1206	0.286675	0.25254	-0.559583	-0.00364616	-0.0149931
AC024257.1	0.192433	1.19477	-0.279997	1.07427	-0.555326	-0.132859	2.70164	0.335108
AC024257.3	-0.0240441	-0.789533	-0.534404	-0.206503	-0.146888	0.535913	3.86809	0.360727
AC024257.4	-0.0924877	0.0175545	-1.00911	0.30957	0.240829	-0.0962382	-0.181664	-0.960289
AC024267.4	0.0129486	0.978269	0.791819	-0.490425	-0.169192	0.339621	1.43974	1.53166
AC024270.5	-0.281677	-1.21824	-0.933837	-0.539928	0.238765	0.279109	1.34131	0.453081
AC024475.1	-0.0199256	1.34352	0.797218	-0.26741	-0.15339	0.659834	0.39867	-0.00916224
AC024475.3	0.0339742	0.179143	0.285033	0.068735	0.780478	0.0861193	-0.0741048	-0.111077
AC024558.2	0.0828095	-0.0241546	-0.0482011	-0.566949	-2.37302	0.510949	0.719225	0.208059
AC024560.4	-0.241433	0.247741	0.721707	0.815685	0.708391	-0.457823	-0.280056	0.800759
AC024560.5	0.0366626	1.92485	1.2555	-0.263197	-0.129686	0.179409	0.542088	0.514266
AC024563.1	-0.114012	-0.658105	0.0502033	-0.12539	0.749392	-1.37769	-0.216343	-0.132015
AC024588.1	-0.0167989	0.68411	-0.0301059	-0.505132	0.627965	-0.305721	0.442312	0.529155
AC024592.2	-0.051485	0.35344	0.181394	0.379917	0.346	-0.504551	-0.435633	-0.947506
AC024597.1	0.154168	-1.18643	-4.10174	1.04379	-0.0247849	-0.235396	2.52134	0.0783217
AC024610.1	-0.449919	0.459883	0.671093	-0.517436	0.438192	1.0247	0.262042	0.295935
AC024610.2	-0.518487	-0.503382	-0.195265	0.136511	-0.662217	-0.0453675	0.0587156	-0.115278
AC024614.4	-0.605766	-0.684741	-0.237523	0.388338	-1.02054	-0.303261	0.221745	-0.150762
AC024619.3	-0.0588153	1.11433	1.08301	-0.306714	-1.12687	-0.0128102	0.39207	0.3605
AC024896.1	-0.130039	0.924005	0.55397	0.7539	0.154558	0.341423	0.383284	0.106834
AC024901.1	-0.079812	-2.47879	-1.60462	-0.0567794	-0.343769	1.09351	0.333909	-0.673056
AC024996.1	0.177582	1.35785	1.26474	-0.979809	-0.0860958	-2.02258	-0.0633529	0.264835
AC025031.1	0.135978	1.85505	1.10596	1.81081	-0.671417	-0.0931	0.0773671	-0.0289829
AC025031.3	-0.0833828	-0.238082	-0.234699	-0.668473	0.658598	0.337829	0.0331289	0.436562
AC025034.1	-0.0783663	2.0371	0.933638	0.164848	-0.348851	0.426584	0.85373	0.607709
AC025043.1	-0.0717002	1.88524	0.851706	0.158702	-0.574229	-0.00942466	0.533314	0.792321
AC025048.2	-0.113653	-0.716836	-0.0384093	0.0976049	0.145242	-0.471651	-1.59096	-0.237727
AC025048.4	-0.40677	-2.37206	0.011295	0.138767	-0.322392	0.28091	0.0158118	1.07087
AC025159.1	0.124302	-1.41108	-0.686655	-0.428437	-0.0743353	0.101272	4.21468	0.593826
AC025164.1	0.0741312	0.79146	1.37797	-0.104321	0.576221	-0.0809215	-1.21872	-0.0285373
AC025165.1	-0.0687548	1.666	0.556296	0.336204	0.120619	-0.370809	0.464382	0.195794
AC025165.2	-0.0830494	0.827737	0.731637	-2.1044	0.0757878	0.515247	1.83123	0.683166
AC025171.1	-0.464912	0.264176	0.202451	-0.489108	1.36075	-0.28796	0.856887	0.751787
AC025171.2	0.0227244	3.2517	0.846499	0.418841	-0.0174253	0.0926138	1.53384	0.58421
AC025171.4	0.0531894	2.15299	0.452886	-0.042826	0.00286051	0.381709	1.81969	0.388279
AC025175.2	0.264572	2.84098	1.49429	-0.261434	0.807818	-2.33631	-0.539443	0.214051
AC025178.1	0.543845	0.810787	2.28545	-0.0237809	-0.0807303	0.0869075	0.0800129	-1.15145
AC025181.2	0.576815	0.0275466	0.0684686	-0.452516	1.02214	0.474038	-0.669479	-0.277434
AC025211.1	-0.128976	0.937082	0.281025	1.10495	0.952492	-0.166833	-0.0299833	0.407241
AC025262.1	-0.319497	-0.265334	-0.277873	0.138938	0.163273	-0.0861484	-0.0651427	-0.236804
AC025263.1	-0.141369	0.729517	1.13841	0.472057	0.974736	-0.356634	0.468826	-0.000905471
AC025272.1	-0.0930695	0.58604	0.181272	0.273886	-0.872207	-0.608466	0.120747	0.451457
AC025283.2	-0.208821	-3.73236	-1.4013	0.811073	-1.05501	-3.21041	0.133557	0.614043
AC025287.4	-0.0698731	0.514453	0.207061	-0.174717	1.96532	0.439586	1.635	0.448377
AC025419.1	0.250029	1.95882	0.968715	1.58181	0.115135	0.0298245	0.0788525	0.722333
AC025434.1	0.451919	0.288308	-0.027287	-1.02458	-0.25986	0.0192543	0.217815	1.05246
AC025449.2	0.451949	0.17688	-0.390892	1.70888	0.350239	0.274443	-0.634393	-0.208224
AC025569.1	-0.776478	0.575262	1.25781	-0.756672	0.105092	0.00278072	0.615127	1.38676
AC025580.2	0.0390582	1.52566	0.919575	0.516258	-0.100307	0.609358	0.537539	0.419174
AC025580.3	0.233646	1.72835	0.477279	0.306649	0.749448	0.0481073	-0.0148709	0.445254
AC025682.1	-0.27474	1.24252	0.673668	0.54641	-0.731337	0.0509226	0.155395	0.763718
AC025774.1	-1.32212	-0.477021	-0.186102	0.107629	-0.355894	-0.102672	0.760965	-0.0958818
AC025809.1	-0.140904	1.38175	0.210913	0.224352	-0.508442	-3.16505	0.407416	-0.181128
AC025871.1	0.0811579	0.971705	0.85392	1.97786	0.888986	-0.241109	0.027193	0.205054
AC025887.2	-0.645171	0.150284	0.259459	-0.0424851	-1.39434	0.443954	1.36928	0.000508014
AC025917.1	-0.0712741	1.1699	1.00908	0.780152	-0.0559312	-0.578698	-0.0117822	0.565606
AC026124.1	-0.00897763	0.129086	0.628667	0.422613	-0.154616	0.0198015	1.27345	0.222621
AC026124.2	-0.0157048	0.453452	0.596394	-1.17573	0.251109	1.14924	0.232393	-0.0940621
AC026167.1	0.40955	-0.388912	-0.301426	1.26672	-0.311661	0.908852	0.418292	0.495192
AC026202.2	0.052425	0.841593	0.563933	0.557812	-0.770453	1.07966	0.950204	0.612105
AC026254.2	0.190574	0.445273	0.0340767	0.574146	-0.00551863	-0.875932	-0.033754	0.0357409
AC026304.1	2.0165	-0.428679	-1.97257	-0.31572	0.0638595	0.640168	-0.135772	-0.250283
AC026310.2	0.158657	0.00882728	-0.0799386	0.201079	0.53266	0.702771	0.0396882	0.2061
AC026316.5	0.0953192	0.78489	-0.210577	1.72603	-0.740341	-0.36205	0.405655	-0.10522
AC026333.3	-0.817863	-2.42545	-0.432357	0.817384	0.287593	0.0931422	0.162794	-0.458098
AC026341.1	-0.100571	-1.47716	-0.0722326	0.0220071	-0.270865	0.426925	0.494251	2.31196
AC026341.2	0.0825593	1.4859	0.535764	-0.202959	-1.38376	0.269212	0.74114	1.0548
AC026347.1	0.0624758	2.21629	1.42798	-0.121828	0.0927441	0.485722	-0.186118	1.60948
AC026356.1	-0.0540132	0.458975	0.407563	-0.755133	0.140925	-2.38046	-0.695978	0.349557
AC026356.2	-0.163521	0.834564	0.967329	-0.0137459	-0.291581	-1.52121	0.325612	0.195367
AC026367.2	-0.0531874	0.379211	0.203552	-0.0142442	-0.388613	0.440441	0.10781	0.024632
AC026367.3	0.74898	-0.0997285	0.152974	0.232479	-0.062881	-0.536986	-0.0465474	0.00418794
AC026369.1	0.113411	1.27773	0.548616	-2.50429	0.242423	2.30069	1.04132	0.848413
AC026369.3	0.0810569	1.5779	0.779202	0.162529	-0.141119	0.751558	-0.0142678	1.25967
AC026412.3	-0.0913335	0.57354	0.323983	0.29801	-0.790089	-0.0252463	0.320509	0.363935
AC026470.2	0.145761	0.60812	0.0788135	0.454548	-0.308916	0.426067	0.505623	0.815788
AC026471.1	0.175596	0.0798722	0.0965095	0.618104	-0.60986	-0.245993	-0.103587	-1.99692
AC026471.2	0.417027	-0.295457	-0.163462	0.00395373	0.176449	-0.700313	-0.306129	-0.200794
AC026471.4	-0.264538	-0.821488	-0.195194	0.621242	-0.0781224	0.0746943	0.776609	-0.604263
AC026585.1	0.200075	-0.191436	-0.110557	0.121869	-0.00201693	0.082939	-0.743779	0.593512
AC026620.2	-0.0319758	0.341313	0.0565488	0.0667389	0.540474	0.543058	0.661058	0.0504458
AC026689.1	-0.00578374	1.29068	1.07868	0.120406	0.251753	0.302419	0.366607	1.13571
AC026704.1	0.240994	1.0265	0.347092	-0.700879	-0.145428	0.36672	1.61738	0.143999
AC026748.3	0.700044	-0.107286	-0.164095	-0.201123	-0.265082	0.133205	0.0342934	0.573041
AC026765.3	-0.926963	-0.557881	-1.32087	0.34228	-0.0136186	-0.174005	0.487927	0.337768
AC026801.2	0.147601	0.605764	0.564702	-0.518046	-0.271801	-0.525034	-1.21563	-0.0838309
AC026803.3	0.109364	1.33742	0.695102	1.17689	-0.569781	-0.0319891	-1.0895	0.000388329
AC026888.1	-0.0265337	1.04359	0.354394	3.85583	-0.97131	-0.425309	0.430407	1.32087
AC026894.1	0.0458205	1.10248	0.874703	-2.28072	-0.211517	0.43489	0.431399	1.86808
AC026979.2	0.841844	-0.111366	-0.427908	0.633515	0.0679499	0.163351	-0.0757528	0.151333
AC026979.4	-0.18871	-2.90277	-1.05322	0.618042	-0.827964	-0.296943	-1.54105	0.110831
AC026991.2	-0.0301613	2.00795	1.29218	0.411468	-0.121017	0.581129	1.26427	1.61572
AC027018.1	-0.0139058	1.45792	0.939189	0.131182	-0.371704	-0.212501	0.622012	0.521525
AC027020.2	0.645446	-0.0374911	-0.16546	0.413406	-2.25633	-0.408054	0.0902268	0.680214
AC027031.2	0.445023	-0.64381	-1.29389	0.971178	0.76999	0.338796	-2.31235	-0.93949
AC027097.1	0.148595	0.579031	0.0487142	0.0905908	-0.657186	0.222601	-0.710554	0.664617
AC027097.2	-0.139275	-0.204733	-0.0329622	0.303184	-2.29283	0.420222	0.0404011	0.780703
AC027117.2	-0.796197	0.236827	0.122096	-0.986041	0.411646	0.747457	0.544072	0.0797404
AC027130.1	-0.0928164	1.44693	0.582847	2.27389	0.14738	-0.0332693	0.510918	0.783082
AC027243.3	0.00794379	1.44178	1.13092	-0.230863	-0.841331	0.336216	0.635787	0.464842
AC027279.1	-1.26853	-0.234986	0.185776	-0.180625	-0.108837	-0.302523	0.0272865	1.20786
AC027287.2	-0.246379	-1.34065	-0.659209	0.770915	2.51798	0.266862	-2.07249	-0.0953462
AC027288.3	0.0111602	1.13061	1.0757	0.191613	-0.207595	-0.0241044	0.365761	1.26363
AC027307.1	-0.0217498	0.227979	-0.0114893	0.782229	-0.214775	-0.369802	-0.139631	-0.985241
AC027307.3	0.154742	0.460215	0.235488	-0.158413	-0.609142	-0.0477535	0.255176	0.226362
AC027601.6	0.824817	-0.239728	-0.169123	1.05669	2.61436	0.00611754	-0.634866	0.318842
AC027644.3	0.568966	-0.219118	-0.452263	1.3362	-0.386946	0.39401	-0.705012	0.162652
AC027682.4	-0.0234104	-0.162707	-0.556607	2.17428	0.523322	0.738068	-0.135266	1.35476
AC027682.6	0.185911	1.0427	-0.303486	0.242557	0.10686	0.056031	-0.467561	0.411817
AC027698.1	-0.144035	0.646769	0.437586	0.347182	-0.77959	0.339905	0.000353707	-0.204733
AC027796.1	-0.219176	0.293105	0.231634	-0.320421	0.21497	-0.801142	-0.53519	0.483465
AC027801.1	0.204943	0.0599358	-0.552228	0.283048	1.03702	0.112109	1.95193	0.00830871
AC027801.3	-0.124946	0.104805	-0.106699	2.19656	0.0977712	-0.703955	-0.0406368	0.0715064
AC027808.2	0.127373	0.100453	-0.131404	-0.693723	0.125042	-1.43321	-0.478769	-0.376649
AC034102.5	0.215658	0.915547	0.678465	0.22547	-0.0195153	-0.596927	-0.49276	-0.843989
AC034111.1	0.182864	1.23671	0.762903	-0.434509	-0.248663	-1.23023	-0.474955	-0.601829
AC034111.2	0.333963	3.46681	0.438693	1.12496	-0.136499	-0.153096	0.929885	1.11803
AC034114.2	0.234429	-0.409414	-0.91148	1.2224	-0.0542106	0.695495	0.958266	0.122029
AC034139.1	0.177542	1.35315	-0.00328502	0.79957	-1.05789	0.380078	-0.0913404	0.607552
AC034193.1	-0.337952	0.695241	1.26538	1.6277	0.0978491	-0.761513	-0.228108	0.41731
AC034195.1	-0.970587	0.213513	0.105896	-0.181473	-0.139837	-2.1582	-0.0248974	-0.0550657
AC034206.1	-0.0161805	0.521148	0.248196	1.60813	0.959506	-0.320368	-0.143221	0.179163
AC034228.1	0.390085	0.394458	-0.192434	0.0553281	0.173884	0.0770831	0.438109	1.22407
AC034228.3	0.0376159	1.28556	0.360636	0.55334	0.245833	-0.154708	0.658202	1.00801
AC034231.1	-0.20649	-0.664326	0.132349	0.472385	-0.314629	-0.100088	0.114053	0.14367
AC034236.2	-0.0227992	0.116371	0.541905	0.685737	0.174088	0.138825	-0.00241204	0.102712
AC034268.2	-0.81795	-0.701236	-0.334983	0.0582439	-0.111084	0.998777	2.38696	-0.917598
AC035140.1	-0.653883	-1.76317	-0.797469	0.696118	0.419526	0.53377	-0.000616997	0.376161
AC036103.1	-0.101078	1.07678	0.627446	-0.154415	-0.401084	0.93312	0.573696	0.84006
AC036108.1	-0.150093	0.0459488	-0.0889159	0.101365	-0.0449767	0.84609	0.872344	0.193192
AC036176.1	-0.0794723	0.162954	0.401022	0.173151	-0.52453	0.662095	-1.68821	0.00802739
AC036214.1	-0.123356	1.26988	0.494104	-1.7203	0.0768565	0.0277683	1.26555	0.338667
AC036214.4	0.107119	0.372466	0.0561222	0.965715	-1.37603	0.128645	0.444247	0.665735
AC037459.2	-0.0269822	-0.577631	-0.52332	-0.0935812	0.447858	2.05188	0.647821	1.0498
AC037487.1	-0.00547988	0.386056	0.042419	-3.09138	-0.111662	-0.695016	-0.0996097	2.93238
AC040168.1	-1.22773	-0.0266278	0.126845	-0.21567	0.287887	-0.0484402	0.991866	0.655989
AC040169.1	0.0399509	0.423565	0.269546	0.216662	0.40336	0.540147	0.00790181	-0.62626
AC040173.1	-0.451126	0.0806608	0.110248	0.396146	-1.50009	0.398756	1.43931	0.848719
AC040174.1	0.0676017	0.295385	-0.380168	-0.680277	-0.283223	-0.889133	-0.47793	-0.42702
AC040934.1	-0.119224	-0.875663	-1.11718	-1.68837	-0.25826	-0.458293	0.665535	-0.520853
AC040977.1	-0.192317	0.313678	2.30064	2.45569	0.0634494	-0.517642	-0.96986	0.202068
AC044781.1	0.0908064	1.06498	0.651639	2.22715	-0.011645	-0.675788	-0.357205	1.59004
AC044810.2	-0.823176	-0.107178	-0.163241	-0.094675	-0.180594	0.222035	0.0210457	-1.3488
AC044840.1	-0.0138223	1.30753	1.08019	0.34553	-0.0599871	1.02978	0.570687	0.739208
AC044849.1	0.809807	1.92919	0.513196	0.284455	0.207534	1.52709	1.07128	0.481886
AC046130.1	0.208278	0.88731	0.685416	0.681698	-0.0332468	-0.329458	-1.45162	-0.182915
AC046134.2	-0.295753	-0.90868	-2.08712	0.0821115	-0.384059	-0.550014	2.55915	0.148811
AC046143.1	0.23303	0.00684156	-0.0809057	2.01034	-0.650135	0.62429	0.430344	1.77894
AC046158.1	0.0673395	1.17618	0.903755	0.867795	-0.483373	-0.476459	0.0652041	1.60083
AC046195.1	0.31852	-0.150016	-0.068687	0.511878	0.00995976	-1.06884	1.72213	1.5269
AC046195.2	0.154883	1.68677	0.952759	0.647227	-0.118128	-0.795282	1.59508	2.9841
AC048341.1	-0.211517	0.608552	0.270545	-0.658578	-0.993711	0.318874	1.69936	0.259094
AC048341.2	-0.145305	0.361042	-0.0631051	0.678703	-0.659269	1.57713	0.475516	-0.0666481
AC048380.1	-0.163329	0.906518	1.32977	0.553444	0.453026	-0.10496	0.421553	0.267609
AC048382.5	0.105002	2.10892	1.02653	0.12764	-0.904689	-0.0300996	1.58033	0.406255
AC051619.4	0.01628	1.02255	0.56544	0.0253027	0.509081	0.461026	0.179231	1.00782
AC051619.5	0.603824	-0.327797	-3.11688	0.154065	2.19217	3.45713	0.53035	0.132614
AC051619.6	0.00724128	1.3082	2.1053	-1.22258	0.823944	-0.199703	-0.413098	0.22627
AC053503.1	-0.739773	-1.52722	-0.0758138	-0.643853	1.54058	-0.129933	0.175665	0.494413
AC053513.1	-0.0155652	1.24008	1.01996	-0.00120316	-0.514919	0.0655625	0.262986	0.615118
AC053527.2	-0.389394	0.585169	0.760299	0.24739	-1.52007	-1.50306	1.32481	-0.0980352
AC055733.2	0.727184	0.288338	-0.83195	0.50455	-1.29266	-0.0252865	0.671572	0.0420134
AC055758.2	-0.451976	0.0490468	-0.0726889	2.30544	-0.126033	-0.783066	-1.46183	-0.401721
AC055811.1	0.120739	1.54737	0.751727	-0.732216	-1.79852	-1.41793	-0.592027	0.647107
AC055854.1	-0.0252938	0.598629	0.329245	2.5304	0.380638	-0.359455	-0.656094	-0.365019
AC055855.1	-0.23085	0.399138	0.245738	0.250233	-0.299848	0.0588126	1.13983	1.06997
AC055855.2	-0.812468	-0.430803	0.0749505	0.0886086	-0.154745	0.21244	-0.0547163	-0.511433
AC058791.1	0.0298538	1.08733	1.18414	1.29607	0.0914286	0.258538	0.0273272	0.00721351
AC060765.2	-0.656705	-0.207305	-0.374786	0.963652	-1.16691	0.00676069	0.663848	0.397088
AC060780.1	-0.398262	-0.939098	0.294095	0.462683	0.0499238	-0.205463	-0.647618	-0.0359776
AC060809.1	-1.15501	-0.410284	-0.924894	-0.0813831	-1.41156	0.69875	0.430484	0.864921
AC060834.2	-1.67568	-1.97181	-0.0769602	-0.255774	0.875872	0.614277	-0.00160252	-0.0488357
AC061958.1	-0.531419	0.372904	-0.0492786	0.0427109	-0.877875	-0.211074	-0.406404	-0.769884
AC061961.1	-0.563627	-1.17727	-0.570135	-0.119894	-0.489873	0.0764743	0.137762	0.0691376
AC061975.8	-0.339823	1.04505	1.42046	-5.42668	-3.34569	0.679744	1.01714	0.949782
AC062022.2	0.0564428	-0.813979	0.357258	0.088199	-0.28823	0.498837	-0.168949	0.204079
AC063944.1	3.79818	0.0199656	-0.39353	0.16792	-0.0420701	0.00669009	-1.1088	-0.281058
AC063979.2	-0.905289	-2.74916	-0.365192	0.155012	-0.144665	-0.361398	0.291462	-0.0367896
AC063980.1	-0.0580139	0.489039	0.182078	0.0544515	-0.455697	-0.991889	-0.586136	-0.0294872
AC064805.2	1.23542	4.42409	0.764999	2.09563	1.03807	-0.125455	0.0662104	0.0850543
AC064807.1	0.0060093	1.23344	0.536477	-0.787591	1.04437	-1.20026	-0.0352842	0.152134
AC064807.2	-0.189046	0.196172	0.0482589	0.0265458	0.303933	-0.210078	1.23844	-0.203927
AC064836.3	0.262153	1.36939	0.497679	-0.231385	0.707354	0.7986	-0.26505	0.159357
AC064836.4	0.224562	1.5625	1.10901	0.739291	-0.425232	0.275193	0.140168	0.138188
AC064852.1	-0.0535753	1.04987	0.414455	1.12871	0.462459	-0.21802	-0.0823107	-0.0590242
AC064871.2	-0.304883	0.842537	0.533445	2.43334	-0.678356	0.465969	-0.0670531	0.224456
AC064874.1	-0.0317515	1.00984	0.766721	0.904948	0.429964	0.330839	-0.0588292	0.62658
AC064875.1	-0.0374169	-0.631686	-0.0748816	-0.120538	0.261061	0.624001	-0.0930481	-0.450237
AC066585.1	-0.121044	0.380041	0.155048	0.0146232	0.133399	-0.42726	0.27218	0.156784
AC066612.1	-0.240094	0.205484	0.259741	0.116641	0.561165	-0.134515	-0.0326683	-0.454789
AC066613.2	-0.0480484	0.514267	0.0447261	0.293198	-0.239808	0.153664	0.374896	0.062825
AC067750.1	-0.308426	0.192574	0.438365	0.590007	1.00202	0.306	0.165255	0.123714
AC067751.1	0.30234	0.96386	0.612375	0.17264	-0.941255	-0.0399927	0.647812	0.755095
AC067773.1	0.301552	-0.472624	-0.239601	1.25657	0.142267	0.123528	-0.449902	-0.0247974
AC067852.2	2.1009	0.112103	-0.229039	0.125995	0.126691	1.30365	-0.0226009	0.0335443
AC067852.3	-0.130414	0.297215	0.239871	0.025082	-0.0334778	-1.20079	0.248362	0.630098
AC067852.5	0.172117	0.602269	0.219518	0.438367	0.70464	0.639232	-0.438242	0.0402348
AC067969.1	1.02662	0.120661	-1.31704	0.197892	0.052605	0.33035	-0.214987	0.405878
AC068025.1	-0.190299	-2.94304	-0.268672	0.22269	0.0870692	0.653554	0.387632	0.33193
AC068025.2	-0.23789	-0.505516	-0.567359	0.669909	-0.258075	0.27273	0.131627	1.3644
AC068051.1	-0.494091	0.928904	0.931897	0.670352	-0.458393	0.220716	-0.0952961	0.277776
AC068112.1	-2.62086	0.0591091	-0.142986	-0.0183056	0.253115	0.571338	1.15973	0.246774
AC068189.1	0.0799505	0.734145	0.733184	-0.247091	4.32157	-0.707121	-0.365079	0.0828757
AC068189.2	-0.125784	0.568024	0.786445	0.406621	-0.226203	0.0471931	0.997102	0.094633
AC068196.1	0.433113	1.10255	1.12586	-3.45247	-0.411707	0.663672	0.149769	0.754976
AC068205.1	-0.200554	0.756087	0.436332	-0.114199	0.21477	0.00929955	-0.278838	-4.64313
AC068205.2	-0.256876	-0.243698	-0.135443	2.06369	0.419984	-0.25818	-0.754233	-1.42583
AC068228.3	-0.18482	0.355604	0.288463	0.531239	0.532061	1.80776	0.124268	-0.191221
AC068234.2	-0.116197	3.31542	0.299005	0.295444	-0.0040715	2.13162	0.563205	-0.172671
AC068254.1	-0.0283743	0.494112	0.155875	0.414938	0.548142	0.625027	0.112749	0.626879
AC068279.2	0.164608	1.45016	1.54543	0.613378	0.938907	1.36066	0.139877	0.247946
AC068282.1	0.0791547	1.56776	0.982932	-0.145552	-1.95074	1.18493	0.865617	1.30451
AC068286.2	-0.680394	-0.21411	-0.501496	0.616231	-1.10263	-1.81793	1.36411	0.443805
AC068305.2	-0.00882421	-0.0231232	-0.0474172	0.034861	0.598126	-0.153687	0.243589	0.0703457
AC068308.1	-0.00894127	1.02466	0.848996	-0.758181	-0.507063	0.0878356	-0.302145	0.29495
AC068338.3	0.0899711	1.52763	1.07472	0.857527	-0.506244	0.451126	-0.186165	-0.794341
AC068389.1	-0.140184	0.188567	0.560116	-0.0883516	2.16042	0.084593	-2.97232	-0.451962
AC068389.3	0.369481	1.27086	1.05498	1.13481	-0.310643	0.263179	0.964163	0.0492502
AC068446.2	0.346307	0.207268	0.799372	-0.108475	0.395241	-1.24796	-0.535027	-0.212176
AC068473.1	0.274997	-0.928682	-0.827255	2.90832	0.335752	-0.641859	0.609456	-0.0806321
AC068473.5	0.132117	-0.292332	0.0244195	0.614167	0.037847	0.728592	-0.0460373	-0.671933
AC068481.1	0.0958431	2.22585	0.31965	-1.25088	-0.0800448	-0.327449	0.72986	0.245554
AC068533.3	0.0675517	1.47112	0.866125	0.172298	-0.195439	0.829282	1.48648	1.33836
AC068587.4	-0.814129	-0.108	-0.152959	0.680121	0.172794	-0.0197946	0.814869	0.157375
AC068620.1	0.430482	-1.04044	-1.16401	0.0805549	-0.0602588	1.02881	0.435207	0.106429
AC068633.1	-0.716509	-0.39747	-0.355378	3.74698	-0.16872	-0.128265	1.00283	0.353746
AC068724.3	0.0145243	1.40612	0.8604	-0.10269	-0.174837	-0.52098	0.287167	1.79317
AC068725.1	-0.10667	0.814299	0.408695	-0.00468373	-0.256641	0.256866	0.175581	0.118291
AC068756.1	-0.104122	1.95908	1.58602	0.101796	-2.26579	-1.80323	-0.124046	1.23266
AC068790.7	-0.687042	-0.131725	0.212724	-0.0296835	-0.545841	-0.47296	-0.0651571	0.147005
AC068790.9	0.429747	-0.177394	-0.717516	-0.277045	0.0575576	-0.492504	0.369446	0.604803
AC068888.1	0.0139967	1.6691	0.607738	0.24292	-0.108832	1.2754	1.77464	1.09514
AC068931.1	-0.130126	0.799922	0.80141	0.582121	-0.794705	-0.314137	-0.0516975	1.06168
AC068987.2	0.0331419	0.689022	0.395787	-1.21392	-0.519737	0.405383	0.606036	1.58326
AC069029.1	-0.08291	0.309265	-0.0262901	2.10506	-0.450396	-0.745694	0.529683	0.250671
AC069133.1	0.0153278	1.77571	0.378928	0.126674	0.0178433	0.0387921	1.42415	0.326633
AC069155.1	-0.180089	1.04963	0.881433	-1.32046	-0.263835	-0.285706	0.844096	0.40278
AC069185.1	0.0644222	0.627032	0.339652	-0.556927	0.0892039	0.365931	-0.129375	0.00618522
AC069209.2	0.173916	-0.726283	-0.0832824	0.567267	-0.0820069	-0.726762	0.144703	0.625975
AC069224.1	0.256932	-0.902725	-1.0264	-0.668081	0.2484	0.585559	-0.0505494	-1.84776
AC069228.1	0.0177128	1.32923	0.9206	-0.145896	-0.501308	-0.250045	0.290091	0.63171
AC069234.1	-0.00702752	0.00787465	0.114458	0.22902	0.263504	1.47978	0.422659	1.04053
AC069272.1	0.121047	0.856172	0.466495	1.1161	-0.468625	0.0977604	0.429957	0.754185
AC069277.1	-1.07737	-0.140063	-0.117621	-0.580955	-0.200038	-0.25324	-0.196947	0.106336
AC069280.2	-1.65925	-0.306315	-0.194935	0.440144	-0.0601527	0.0631399	-0.0886104	-0.444625
AC069287.3	-0.0651707	0.281957	0.403317	-1.91889	1.03354	0.336309	-0.276669	-0.0829948
AC069431.1	-0.688662	-0.790958	-0.173498	0.0954946	1.75626	1.01906	0.146533	-0.956647
AC069437.1	-0.0151595	1.11743	0.847418	-0.489088	-0.180919	-0.668831	0.00434933	2.01735
AC069503.1	-0.342194	-2.26549	-0.0579857	-1.20902	-0.11602	0.279085	-5.56935e-05	0.138941
AC069544.1	0.480521	-0.551646	-0.712369	0.637985	0.717964	1.84817	-0.650979	-2.63612
AC069547.2	-0.00124468	1.33017	0.997798	-1.05188	-0.372813	4.08153	0.141845	0.682203
AC069549.1	-0.148935	0.524628	0.9489	-0.856141	0.0302608	0.580669	0.312928	0.701988
AC069549.2	-0.174117	0.511273	0.469506	-1.26042	-0.350186	0.753048	0.833419	0.098504
AC072028.1	-0.307864	-0.272056	0.0124746	0.469734	0.136642	0.518729	0.187717	0.0276252
AC072061.1	0.0253612	0.010363	-0.150159	1.77085	-0.316563	0.42468	0.0916069	-0.0317226
AC072062.1	-0.483293	0.231797	0.0378198	-0.048267	-0.191762	-0.560665	0.333062	-0.242637
AC073046.3	-0.0141535	1.2786	1.1338	-0.503319	-0.633478	0.162426	0.772831	1.44531
AC073050.1	-0.27472	-1.10319	-0.155858	0.877913	-0.0392724	-0.135863	-0.0506764	-0.351545
AC073111.4	0.415791	-1.09349	-0.386416	0.390911	0.703275	0.937079	-0.273315	-0.00871206
AC073114.1	-0.329291	-2.70648	-0.102541	-0.17708	-0.304528	0.848274	3.83489	0.244212
AC073167.1	-0.015533	1.33177	0.983008	0.508	-0.253379	0.627605	1.61063	1.3255
AC073195.1	-0.159389	0.223416	0.277511	0.459483	0.322481	0.415802	-0.112994	-0.371968
AC073225.1	-1.56303	-0.0828056	-0.0857023	0.374252	-0.927666	0.152706	0.366996	0.400993
AC073263.1	0.431374	-1.47355	-1.05065	1.45915	-0.221891	-1.00732	-1.18417	-0.230718
AC073270.2	0.33082	-0.0444692	-0.0223668	0.254512	0.164177	-0.75041	0.605766	0.0836488
AC073316.3	-0.877465	-1.08734	-0.319976	0.130244	-0.212517	0.117384	0.390652	-0.376416
AC073320.1	-0.97641	0.678978	0.95583	0.547616	-0.0879605	1.53089	0.810562	0.964281
AC073332.1	-0.00210607	-1.06137	-0.393436	0.508797	0.336084	-0.0232625	0.659651	-0.152268
AC073333.1	0.182491	1.49841	0.985927	-0.264982	-0.148229	1.08009	1.11697	0.431296
AC073342.1	-0.156048	0.630093	0.719994	0.566605	-0.576398	0.611348	0.260368	-0.0782968
AC073343.2	0.841934	2.17296	0.177478	0.0771128	-0.383627	0.625935	1.8526	0.525127
AC073346.1	0.0369805	1.59425	1.23061	0.000741455	-0.382825	0.0888698	-0.31034	1.20071
AC073349.4	-0.00082857	1.06082	0.992319	0.752699	-1.5823	0.504019	0.142981	-0.145163
AC073365.1	-0.365162	0.121898	0.786883	0.573781	0.188167	-0.388717	0.234235	0.662611
AC073389.1	-0.0670677	-0.5192	-0.450017	-1.41109	-0.309639	1.32461	1.32344	-0.0809278
AC073389.2	-0.186826	1.69146	0.942331	-1.79206	-0.724153	0.00660519	4.12058	0.486405
AC073475.1	-1.43424	-0.318571	0.730538	0.717852	-0.435451	-0.562316	1.31495	0.796664
AC073476.3	0.0121073	1.01676	1.41967	0.723775	-0.476299	-0.899403	-0.118327	-0.221397
AC073508.3	0.0502926	-0.149137	-0.297978	-0.323809	-0.225628	-0.307659	-1.13529	0.0298453
AC073529.1	0.0220124	-1.59474	-1.57626	0.0935736	-0.19642	-1.16595	-0.708396	-0.154228
AC073548.2	0.194414	1.07258	0.962047	-0.15552	0.229966	0.52568	0.123021	0.98764
AC073569.2	-0.351754	0.777886	1.11655	0.305877	-1.19783	0.00958845	0.260413	0.30399
AC073575.1	-0.024049	1.79982	0.772444	1.2084	-0.232149	-0.573604	0.564732	0.826618
AC073592.1	-0.0608162	0.730152	0.558831	4.53297	1.20395	-0.903825	-1.37019	0.736049
AC073593.2	0.0390015	2.01156	0.302076	0.398727	0.526058	0.816816	0.449462	1.49945
AC073648.7	0.00946199	0.891722	1.18598	-0.534092	-0.22849	-0.149271	0.110106	0.846026
AC073840.1	-0.178718	0.873487	1.20051	-7.13243	0.379803	0.316504	0.0477451	0.360351
AC073842.2	0.0882119	1.16294	2.13384	-0.292331	0.0467912	0.0529373	-0.341708	-0.101104
AC073878.1	0.0101037	-0.593815	-0.441387	-0.255535	-0.142117	-0.244326	1.26467	-0.00641273
AC073896.2	0.251912	2.87875	0.854092	0.407945	-0.779942	0.150763	0.940075	0.758816
AC073896.3	0.0291283	1.36619	0.743747	0.542167	-0.0708109	0.701109	1.0743	0.293409
AC073957.1	-0.149572	-2.46514	-0.649358	0.112244	-0.377337	-2.2087	0.863694	0.31382
AC073957.3	0.185978	-0.0944697	-0.00378663	1.11973	0.984971	0.0573108	0.0343836	-0.109982
AC074032.1	0.125695	3.49548	1.18717	-3.57652	-1.07767	-0.379497	0.707048	0.023912
AC074117.1	-0.0773705	1.03399	0.0742922	1.07311	0.488795	0.644478	-0.635272	-0.0187615
AC074124.1	-0.104842	1.13679	0.906992	-0.132283	-0.158365	0.561955	0.118343	0.222664
AC074351.1	-0.371527	-1.09656	-0.437497	1.07498	-0.385275	0.2151	0.323823	-0.253865
AC076966.2	-0.0133877	-0.557872	-0.719985	0.899477	0.0588263	-0.287105	-0.174848	-0.88493
AC077690.1	-0.105549	1.30302	0.56174	0.189615	-0.0124444	-0.331748	-0.0557382	1.76563
AC078778.1	-0.219174	1.02753	1.25846	-0.768781	0.000794995	0.723424	0.218378	0.273414
AC078785.1	0.0444932	-0.438062	-0.626181	-0.0699212	-1.0341	0.500347	1.30941	0.676243
AC078802.1	0.562981	-0.177274	-0.497176	-0.159866	0.131111	0.123682	-0.717425	-0.0544002
AC078842.2	-0.0957533	0.670255	0.447099	0.118459	-0.174295	-0.0549899	0.749155	0.250099
AC078846.1	-0.151192	-1.15801	-0.713066	0.107417	0.261524	-0.553341	-0.112494	-0.180537
AC078864.1	0.294245	4.50498	0.713948	0.0546303	0.352836	1.00413	1.31387	2.20412
AC078881.1	-0.176621	1.46416	3.29012	0.924269	0.0570909	-0.460468	0.171564	0.440543
AC078883.1	-0.119407	-0.867782	-0.376052	5.90013	0.180724	0.137801	0.233595	0.0378016
AC078909.1	-1.32947	0.121223	0.0745789	0.161932	-0.31278	-0.0887724	0.0505157	0.153996
AC078923.1	-1.04532	-0.527943	0.029755	0.503566	0.306354	2.24393	0.929531	0.563997
AC079015.1	0.114012	1.10335	0.518321	-0.00586612	-0.278678	1.45916	2.06127	0.958246
AC079031.1	1.27578	-0.126241	-1.18072	-0.0338096	-0.521586	1.28783	1.61685	1.07013
AC079052.1	-0.291886	0.0414858	0.392999	-1.56115	0.167688	-0.209729	-0.135491	1.00998
AC079062.1	-0.145974	2.02142	1.338	0.0439842	1.2862	-0.0300621	-0.557763	0.217579
AC079089.1	-0.110025	-1.12264	-1.28139	-0.00585437	-0.151325	0.13514	0.245968	-0.887242
AC079117.1	-0.137308	1.01303	0.410369	7.70821	0.200045	-0.4598	0.712241	0.44811
AC079140.6	-0.0318908	-0.985818	-0.563613	0.580548	-0.230884	-0.568922	0.181728	-1.61165
AC079142.1	-0.403611	-2.76636	-0.793826	0.726109	0.2762	-0.35251	-0.2649	0.00705515
AC079145.1	0.0597716	0.139048	1.12367	-0.0304954	-0.0305487	1.56054	0.378354	-9.1952
AC079154.1	0.458478	-0.579592	-0.431781	0.348037	0.0915291	0.116896	-0.0809081	-0.190797
AC079174.2	-0.069352	0.775008	0.295801	0.01493	0.853957	1.07174	0.200618	1.40192
AC079177.1	-0.0944039	1.22517	0.843313	0.691745	-0.698848	-1.62838	-0.215027	0.513984
AC079193.2	-0.130592	0.317198	0.295759	-2.67277	0.222158	-0.752416	-0.719326	-0.249172
AC079209.2	0.0745672	0.832665	0.513374	2.39135	-1.22497	-0.271518	0.218829	0.453424
AC079210.1	-0.343286	0.0140986	0.112042	-0.221603	-1.27551	-0.66039	1.65673	0.370139
AC079226.2	0.0215852	1.32446	1.05256	0.419812	0.721286	0.433676	0.0473734	2.4458
AC079296.1	0.115036	1.01798	0.19927	-0.55296	-0.0259494	0.145294	0.131838	-0.330254
AC079305.3	-0.20228	-0.769101	-1.28916	0.747244	1.23789	-0.16421	0.389799	0.0564331
AC079313.2	0.348004	0.980558	0.0269051	0.268288	-0.125166	-0.210227	3.288	0.796437
AC079322.1	-0.199876	0.593945	0.803734	0.0681897	0.1043	0.893109	0.278989	0.507298
AC079336.4	-0.169384	0.970254	0.504039	0.138355	0.28483	0.306452	-0.270267	0.303079
AC079362.1	-0.128665	0.286489	-0.249327	0.215296	-0.889314	1.72224	0.892338	-0.170704
AC079385.1	-0.349795	0.546204	0.0507464	0.31117	-0.22456	1.17794	0.0696255	1.03055
AC079411.1	-0.294105	0.496052	0.680937	-0.610324	-0.289061	-0.115266	-0.527657	0.0619634
AC079447.1	-0.399273	-0.815069	0.283402	0.091477	-0.121561	0.846416	2.04543	1.11287
AC079465.1	-0.108677	0.658333	0.265612	-0.223392	-0.630309	1.88729	1.6855	1.11257
AC079601.1	0.276651	0.0474443	0.461678	0.690934	-0.499284	-0.103766	0.344712	0.137142
AC079610.1	0.0446401	0.554287	0.48507	0.2837	0.276743	-0.0714599	-1.24814	-0.309848
AC079630.1	-0.659573	-0.0281947	0.0756816	0.577019	0.357525	-0.281447	-0.625858	-1.03902
AC079760.1	0.0570653	-0.45206	-0.787621	0.236011	-0.319234	-0.242031	1.77103	-0.114523
AC079760.2	0.127145	1.46692	0.421432	0.243541	-0.380539	0.201589	1.59783	0.0326386
AC079772.1	-0.441688	0.0644234	-0.0996061	0.85285	-0.462297	0.147393	-0.0675874	-0.0271148
AC079781.5	-0.127095	0.821611	0.460918	1.03356	-0.918568	-0.554156	0.764612	0.622513
AC079790.1	0.217477	0.290526	0.158428	0.34407	-0.275844	-0.0743476	-0.719914	0.642358
AC079793.1	-0.494915	0.35016	1.17595	-0.75237	-0.132233	-0.34606	-0.0213748	0.281732
AC079804.3	-1.29706	-0.06425	-0.0053269	0.817862	0.879861	0.840913	0.511028	1.14468
AC079807.1	0.3378	0.127322	0.115464	0.718017	-0.042125	-0.0103346	-0.433771	-0.947781
AC079822.1	-0.0659254	1.01904	0.407751	1.46848	-0.421549	0.274528	0.414003	0.0491677
AC079841.2	-0.0651502	1.53341	0.666469	0.378624	-1.02495	0.876574	0.406361	0.510182
AC079848.1	1.08138	1.28593	0.777732	-0.0581993	-0.0799286	-1.52104	-0.169417	-0.399967
AC079907.1	-0.121716	1.45052	0.924705	-1.58071	0.364299	-0.102269	0.729563	0.27151
AC079910.1	0.0111253	0.316407	0.271928	-0.368692	-0.198855	-0.0818322	-0.0904483	0.732374
AC079915.1	-0.306288	-0.419522	-0.280448	1.58522	-0.346843	0.117911	0.213332	-0.124564
AC079921.1	-0.0887237	0.923729	0.0627414	-0.337028	-2.01995	-0.537815	1.32237	1.04642
AC079922.2	2.53161	-0.0311583	-1.19478	0.934001	0.681912	-1.17464	-1.369	-0.201131
AC079949.1	-0.0531183	-0.390302	-0.343019	0.262979	0.475527	0.988856	0.00998496	0.209949
AC079949.3	0.0838005	-0.194089	-0.436026	-0.790647	1.37347	1.30962	0.135846	-0.068557
AC079950.1	-1.46621	-0.433128	0.0384336	-0.139804	-0.0975924	-0.0978519	0.746281	0.0923721
AC080038.1	0.339074	0.00688316	-0.153187	0.176072	0.687462	0.209341	-0.0770965	0.0432777
AC080112.4	0.230538	-1.01918	-0.530638	0.043639	0.54702	0.307252	0.0577299	-0.408779
AC080162.1	-0.0441765	1.32337	0.877822	0.0764804	-0.515237	0.000529816	0.0220265	0.619974
AC083798.2	0.510833	1.85831	0.571961	0.833035	-0.352237	-0.189279	0.238012	0.654342
AC083805.2	0.104171	0.617693	0.638345	-1.42352	0.0171848	-0.206501	-0.0389153	0.00481035
AC083843.3	0.175728	0.14101	0.0889974	1.10606	0.708615	0.643755	0.905357	-0.488218
AC083862.3	-0.101825	-0.16722	-0.437403	0.17426	0.247873	-0.404229	0.0196532	-0.126982
AC083870.1	0.0336648	1.20289	1.20564	0.0793791	0.124163	0.86611	4.19164	0.463286
AC083880.1	0.1395	0.128469	-0.0686893	0.00747691	0.112523	0.375722	-0.359665	-1.08811
AC084018.2	-0.00127494	-0.336509	-0.308774	-1.45459	0.734681	0.0546319	-0.372886	0.583996
AC084024.4	0.035926	0.5959	0.22278	-0.635419	-0.247229	-1.52885	-0.451983	-0.261624
AC084036.1	0.0684905	1.69424	0.716711	-0.687081	0.18447	0.369803	0.115871	0.505253
AC084125.2	1.37545	0.132804	-1.07571	-0.0659077	-0.433262	-0.698202	0.470507	0.170258
AC084198.2	-0.213529	-3.61565	-0.875054	0.687642	0.00348672	-0.98774	0.0572435	-1.48988
AC084357.2	-0.118904	1.07402	0.766326	0.915139	-1.51137	-0.198734	0.760056	0.154654
AC084361.1	-0.0121497	1.31255	1.12972	-0.234687	-0.463954	0.135412	1.24451	1.79144
AC084724.1	0.0164943	1.08631	0.729453	1.42028	-0.970615	-0.0500948	0.0709101	0.114927
AC084759.2	1.52501	0.513819	0.431351	-0.248565	0.695003	-0.0370183	0.715232	0.419978
AC084816.1	-0.0636745	-0.583709	-0.613298	-0.0149789	0.153026	-0.164227	0.253117	-0.167892
AC084864.1	-0.536892	0.399616	0.204672	0.341212	-0.365358	-0.621859	0.0232862	1.45724
AC084864.2	0.317881	0.172335	-0.373459	0.173391	-2.17925	-1.60482	-0.00723657	-0.780048
AC084866.2	-0.00187267	1.63665	0.659109	0.606617	-0.92623	-0.649143	-0.0190808	-0.0219379
AC084871.1	0.258028	0.706768	0.160883	0.00501049	-0.331379	2.40406	1.10604	1.06414
AC087071.2	0.0624006	1.25014	0.785099	0.721565	-1.36807	0.363036	1.38682	0.561074
AC087164.1	0.648449	-0.256192	-0.324565	3.01221	0.00357399	0.482772	1.45006	-0.340619
AC087190.1	0.0521739	1.09847	0.588372	2.0156	-0.0283255	-0.0516203	0.515017	0.511146
AC087239.1	0.293439	-1.76707	-1.57572	0.431184	0.816899	-0.04833	-1.28733	-0.511738
AC087241.2	-0.11897	0.422774	1.07339	-0.0679591	-0.291949	0.585688	0.508645	-0.377269
AC087276.2	0.0904398	-0.347999	-0.496475	-0.505559	-0.983469	0.272261	0.602971	0.938604
AC087280.2	-0.351226	-0.289556	1.20472	-0.376644	-0.337055	0.476407	0.415586	-0.233558
AC087286.2	-0.0072377	0.829461	0.747627	0.292583	-1.40664	0.305087	0.424775	1.49831
AC087294.1	-0.351287	0.328021	0.263508	0.122166	0.319494	-0.869665	0.13291	0.341163
AC087362.1	-0.0617954	1.07009	0.745747	0.223824	0.270865	1.32211	0.511846	0.25472
AC087457.1	-0.224028	-1.26415	-0.0120832	-1.13924	0.684629	-0.0337382	-0.736167	0.114841
AC087500.1	-0.217516	-0.951251	-0.538939	1.28896	-0.490846	0.230133	0.899699	0.394904
AC087501.1	-0.0370242	1.97403	1.75711	-0.00954391	-0.368173	2.52473	1.6934	1.25017
AC087521.2	0.0258725	1.05578	0.984468	0.13138	0.431039	1.03428	0.0942547	-0.010923
AC087521.3	0.0609405	0.74048	1.57797	-0.559462	-0.441854	-1.3139	-0.109391	0.0133276
AC087564.1	-0.112604	7.22349	1.54531	-0.045884	1.63636	0.586678	0.542934	0.100204
AC087741.1	-0.0122595	-0.872415	-0.0425905	0.180918	-0.313545	1.10222	1.49135	0.170924
AC087854.1	0.149395	1.64755	0.399171	0.0584032	0.382704	-0.24583	0.49288	0.968097
AC087855.1	-1.28394	0.123886	1.43993	-0.296852	0.888313	0.059348	-0.646227	-0.124092
AC089985.1	-0.0856031	1.37194	0.396382	1.66248	-0.518655	-0.592693	0.00582069	0.566526
AC090061.1	-0.22003	-0.072534	-0.0964788	0.230893	-0.273566	-0.59865	-0.03104	-0.589968
AC090114.2	0.491296	0.448085	0.0934284	-0.40374	-0.173454	-0.397076	-0.0511203	0.0556166
AC090115.1	-0.109706	0.123957	-0.369958	0.822387	0.152894	-0.527674	1.2279	0.0333251
AC090125.1	-0.00885297	0.0145107	-0.138269	-0.727691	-0.269791	-1.47028	-0.683419	0.164135
AC090136.3	0.12879	1.15869	0.852705	-1.34167	0.0491809	-0.287177	-0.329375	-0.0556448
AC090152.1	0.0923746	0.290165	0.0837332	0.834186	0.323259	0.123262	-0.303204	-0.202511
AC090197.1	-0.358972	1.06495	0.695068	-0.480522	1.03436	-0.5926	0.176501	-0.0110119
AC090198.1	0.0249844	0.522145	0.831915	-0.295252	0.0548499	0.157092	0.175189	0.643227
AC090204.1	0.304039	1.6272	1.35945	0.113505	-0.591917	0.927843	0.534992	-0.645726
AC090241.2	0.563614	0.98594	0.371014	0.990896	0.152594	0.341312	0.348609	1.78346
AC090282.1	-0.233678	0.212507	-0.28844	0.714815	-0.245272	-0.230604	1.2815	0.201619
AC090360.1	0.0659551	-0.915793	-1.45114	-0.0438818	-0.846617	0.379763	0.104798	-1.13674
AC090515.2	0.097263	0.118974	0.8451	-0.348988	-0.0848626	-0.356165	-0.077765	0.491751
AC090517.2	-0.274816	0.574902	0.714827	-1.81703	-0.454244	0.445744	0.266122	-0.129155
AC090517.5	-0.667919	-0.420867	0.125372	-0.484701	-1.10111	-0.443374	-0.0589316	0.00110497
AC090518.1	-0.204464	-2.81407	-0.00871332	0.589008	-0.762521	0.364852	-0.142062	-0.365474
AC090531.1	-0.0652577	0.586728	1.15622	0.407675	0.557365	0.955925	0.566668	0.687672
AC090559.1	0.0893935	1.37497	0.312637	0.247717	-0.0794857	-0.316775	0.448568	0.14508
AC090572.2	-1.56816	0.204958	0.243997	0.501036	-0.575179	-0.947085	-1.16953	-0.286162
AC090572.3	-1.60908	-0.217988	-0.173901	1.80746	-0.569737	-0.666148	-0.531324	-0.577923
AC090578.1	-0.286067	-1.68896	-0.73874	-0.316106	0.0494836	0.133624	0.542624	0.297447
AC090579.1	0.0718501	1.7477	1.00656	0.110108	-0.262658	0.697267	0.503848	1.14207
AC090589.2	-0.0137077	1.26707	0.926289	0.230687	-0.00787922	0.584244	0.661312	0.34901
AC090617.10	0.218529	0.952233	0.532301	-0.89111	0.172524	-0.162617	-0.325346	-0.981452
AC090617.4	-0.00945884	0.992266	0.567804	0.422639	-0.0719024	1.02975	1.70764	1.36173
AC090617.5	-0.0358047	1.30071	1.20229	-0.193044	-0.0350005	0.473656	-0.320963	0.974854
AC090618.1	0.167352	0.661867	-0.526649	0.27544	0.25566	-0.18434	0.296747	-0.168208
AC090625.2	7.46299e-05	0.334978	0.527622	-0.0999777	0.180095	0.591736	-0.349741	-0.216799
AC090630.1	-0.0791438	1.124	0.676614	3.35184	0.0595316	-0.0118147	-0.399916	-0.178438
AC090644.1	-0.0542062	1.04608	0.938184	-0.509252	-0.0379612	0.043291	0.249217	1.29831
AC090709.1	0.0244428	1.64017	1.09371	-0.0245364	-1.44799	0.193952	0.717871	1.11262
AC090772.1	0.0633191	1.89457	0.220817	1.16054	-0.212349	0.183766	0.218383	0.222649
AC090772.2	0.0889464	1.20901	0.458076	0.456102	0.0636101	0.397946	0.132707	0.0575334
AC090825.1	-2.24574	-0.387157	-0.265601	-0.0740087	-0.156652	0.572957	-0.17162	-0.948866
AC090844.2	-0.38526	0.728752	0.172264	2.72447	-0.859936	-0.364154	-0.196405	-1.95861
AC090912.1	-0.599234	-0.821015	-0.376277	0.147809	0.226572	-0.03803	-0.0207075	-0.449112
AC090945.1	0.0521234	0.083738	-0.0145633	0.821266	-0.281395	0.3632	0.523736	-0.0430371
AC090971.2	0.186596	1.89078	0.125002	2.63747	-0.239454	0.45352	0.619488	-0.0184165
AC090993.1	-0.393157	0.40945	0.975428	-0.665909	0.229046	1.39784	0.0603725	0.0219038
AC091045.1	0.133769	2.5383	1.46816	-0.390997	-0.256078	1.23451	0.711561	1.58619
AC091057.2	-1.67995	0.00413259	0.122791	0.438316	0.193297	-0.81262	-0.0583717	0.00280675
AC091078.1	-1.20701	-0.0896238	-0.271893	1.21967	-0.348923	-1.1399	0.0348135	-0.393025
AC091117.2	0.0427167	0.88977	0.433725	0.28637	-0.559299	0.18958	0.0408162	0.437813
AC091132.2	0.122256	2.15998	1.58894	0.701556	-0.437176	1.36251	1.43434	0.796569
AC091132.4	-0.0318076	0.825897	0.58119	1.26684	-0.0437929	-0.490797	-0.0822967	1.31725
AC091133.1	-0.0498646	1.16792	0.792144	1.66279	-0.353052	1.30742	0.931365	0.742662
AC091138.1	-0.340326	-0.962966	-0.323752	1.34996	0.695442	-1.35514	-1.4511	0.00443825
AC091151.5	0.172441	-0.311431	-0.393303	0.672104	-0.193792	0.270165	0.615691	-0.0735143
AC091153.2	0.0844797	1.0853	0.490673	-2.87991	-2.10811	-0.172302	1.16358	0.820971
AC091178.2	-1.16716	0.242848	0.233047	0.248275	-0.0561872	0.311565	1.43478	1.21075
AC091180.2	0.761085	-0.244976	-1.13787	0.248191	-0.0727856	0.985739	0.138109	-0.000904227
AC091180.5	-0.0957215	-0.562777	-0.121283	0.297547	-0.332089	1.45438	0.480796	-1.48205
AC091196.1	-0.920001	-0.330816	-0.0245209	1.07125	-1.00768	-0.476629	0.564983	0.546022
AC091212.1	0.176976	-0.321611	-0.5774	1.11313	-0.772195	0.40475	1.43247	0.319986
AC091214.1	0.845323	-0.779974	-0.203221	-1.86138	0.271343	1.45315	0.862089	-0.126897
AC091271.1	0.0976904	-1.11415	-1.14989	0.473803	0.661287	-0.0766262	-2.45635	-0.794391
AC091544.4	0.322281	1.05851	0.88097	2.69093	1.00576	2.51821	2.65321	-0.300818
AC091563.1	-0.145877	-0.189942	-0.229499	-0.60484	-0.190828	-1.73328	-0.596353	0.218832
AC091576.1	-0.251722	-0.0113561	-0.165428	-0.252557	-0.271137	0.120468	-0.0744023	0.537597
AC091607.2	0.321142	1.52062	1.34411	-0.594304	-0.31156	0.423869	0.349108	0.51432
AC091646.1	0.555842	2.82924	0.73821	-0.294235	-0.595458	0.639919	0.663504	0.429768
AC091729.3	0.670901	0.293035	-0.162212	-0.0442145	0.403231	0.819675	0.22924	0.116333
AC091820.2	0.078865	3.00663	2.14169	-0.482236	0.392055	2.02035	1.12109	0.712171
AC091826.2	-0.270089	0.981059	0.722194	-0.0890176	-0.0278388	0.218452	2.51157	0.587707
AC091885.2	0.231702	1.56137	0.593635	0.880507	0.601381	1.59974	0.673611	1.36565
AC091887.1	-0.0151031	1.59942	1.53921	-0.257057	-1.26602	1.06883	1.12922	0.329627
AC091912.3	0.103015	-0.505503	-0.458008	-0.0298696	-2.43348	-1.44206	0.637898	0.247588
AC091938.1	-0.160459	1.10212	1.03913	0.675591	-0.758012	0.265946	0.413872	0.0996032
AC091946.1	-0.012548	0.510941	0.146782	-0.195689	-0.294249	-0.478131	0.11682	0.488088
AC091978.1	-0.107582	-2.76126	-0.862095	0.440983	0.0279413	-0.632162	-0.272215	-1.16844
AC091982.1	2.06608	0.548304	0.212612	-0.62993	0.00735386	-1.23413	0.171773	0.135664
AC092040.1	0.110934	1.06275	0.889602	0.270268	0.591475	0.558639	0.210723	0.916477
AC092100.1	-0.826885	-0.278741	-0.367764	0.380377	-0.065498	0.537786	-0.0734885	0.333046
AC092111.1	0.083262	-0.510904	-0.648172	1.91222	0.0745446	0.788972	0.782185	0.238209
AC092114.1	-0.16373	1.35068	0.677084	0.451298	0.313191	-0.253661	-0.35279	0.427676
AC092115.3	-0.215511	0.194357	0.411475	-0.612487	-4.70489e-05	2.26065	1.29616	0.901349
AC092117.1	0.303237	-0.0311899	-0.768627	1.15144	0.43739	-1.27922	-1.17041	-1.37263
AC092119.2	1.25601	-0.295422	-1.41488	0.293465	-0.0974624	-0.127117	-0.169208	0.196954
AC092120.3	-0.020627	0.778585	0.726031	0.160681	0.120035	-0.0279427	0.302564	1.84528
AC092123.1	0.110861	0.389352	0.256759	1.56379	-0.422492	0.564969	0.447836	0.248481
AC092139.1	-0.236307	0.738746	0.680709	1.0554	0.0271518	-0.594843	-1.06278	-1.53265
AC092140.1	0.0491656	1.36056	0.649617	-0.18337	-0.462117	0.34284	0.789808	1.57603
AC092142.1	-0.197124	1.26035	0.909039	0.80648	-3.27656	0.623946	1.95972	0.934137
AC092155.1	-0.241631	1.37271	0.119826	0.101202	-1.0448	0.122029	0.145506	-0.198971
AC092159.2	-0.35541	0.434239	0.398345	0.543845	-0.182461	-0.258671	-0.0414375	0.273655
AC092164.1	-0.290665	-1.13764	-0.748131	-1.45333	0.749309	0.0544088	0.317318	-0.281424
AC092171.3	0.587409	1.25952	0.723412	0.512349	0.209892	0.791511	0.501801	0.114059
AC092171.4	0.275423	0.668314	0.456215	2.29872	0.700352	-0.179196	-1.21934	0.157514
AC092171.5	0.395596	1.04545	1.02094	-0.677981	0.464095	0.925126	-0.234374	-0.847033
AC092279.1	-0.604011	0.0276658	0.557011	-0.27603	-0.419124	-0.0341514	0.549989	1.26256
AC092295.1	0.161451	-0.243498	-0.267209	6.73855	0.63646	-0.281475	-0.653461	0.209084
AC092296.2	0.0421255	2.11951	0.756299	-0.103449	-1.39676	0.89772	1.04949	0.977956
AC092329.4	0.841918	0.647489	0.493596	2.11395	-0.454998	-0.386867	-0.787384	-1.40994
AC092335.1	0.0691908	-0.0407733	0.240811	-0.336224	0.594581	-0.621444	0.413482	0.566531
AC092338.2	-0.149451	2.97301	1.33966	-0.107297	0.0418257	1.98482	0.894449	0.332748
AC092338.3	0.164667	1.65119	0.92921	0.898005	0.409888	-0.475154	0.352968	1.12395
AC092378.1	-0.913434	0.292803	0.030335	-0.0197565	-0.326507	0.612862	0.725946	0.700757
AC092384.1	0.286285	-0.952049	-0.496386	-1.10656	0.6983	-0.149421	-0.221247	0.712102
AC092422.1	-0.176258	0.520673	0.150561	0.597109	3.52454	1.30087	-0.208623	-0.159162
AC092428.1	-1.26003	-0.409714	0.104396	-0.368267	0.0723678	0.116043	0.0360195	1.11215
AC092431.1	0.20957	0.974787	0.193837	-0.0976609	-0.0802958	0.0858907	0.83692	0.24389
AC092436.3	-0.202166	0.595332	0.0624226	1.15005	-0.347685	0.479303	0.227675	-0.30179
AC092445.1	0.0721445	0.643961	-0.0183213	0.240179	-0.664018	-0.413371	0.587841	0.254606
AC092535.4	-1.58889	-2.32082	-0.336629	1.3936	-0.93874	-0.704878	-0.825287	0.0073973
AC092567.1	-0.0479626	1.67109	0.867852	0.924623	-0.32412	-1.58633	0.157801	0.516295
AC092574.2	0.0128504	1.34669	0.402397	0.460245	-1.25679	-0.799783	1.9884	1.0024
AC092620.1	-0.0360767	1.0139	1.29988	-1.09456	0.0767195	-0.0457487	-0.114424	0.425923
AC092640.1	-0.00236895	1.00474	0.667879	-0.195625	-0.426357	0.806542	1.05214	0.217293
AC092645.2	0.420217	1.04497	0.252917	-0.22079	-0.557775	0.140464	0.860584	0.0182496
AC092650.1	-0.224914	0.526683	0.175876	-0.134761	-0.374462	1.2169	1.17183	-0.669458
AC092651.3	-0.0860688	1.02622	1.71946	-0.759692	0.718593	0.460329	0.173549	0.466304
AC092666.1	-0.0349624	0.608401	0.639244	0.965986	-0.261843	0.128168	0.118607	1.02842
AC092674.1	0.346772	1.02014	0.711447	0.377174	-0.747702	-0.0887978	0.333292	0.108357
AC092675.1	-0.309816	-2.55302	-0.33225	-1.52339	0.876127	0.612374	-1.00678	0.714351
AC092681.3	-0.144821	0.973305	0.536955	2.60135	-0.0211319	0.0179441	-0.102774	-0.551827
AC092683.1	-0.340166	-0.578951	-0.195781	-1.44692	-2.46517	0.357777	0.894989	0.795445
AC092691.1	-0.163606	0.018427	0.110538	-0.187416	-0.266275	-1.08809	-0.459406	0.175749
AC092691.3	0.0157657	0.979421	0.578397	0.0535269	-0.402199	0.197411	-0.181308	0.927621
AC092720.1	0.200547	-1.13699	-1.00702	1.08227	-0.0769755	-0.175085	0.357033	0.188533
AC092720.2	0.139975	0.0631658	-0.606635	0.235361	-0.281866	0.193572	0.151679	-0.341909
AC092745.5	0.0932784	-0.524492	-0.261261	-0.296326	0.0641306	0.0183846	0.236224	-0.0912814
AC092747.1	-0.0542632	1.16557	0.53625	-0.1926	-0.963331	0.20549	4.18849	1.1203
AC092747.4	0.0911788	-0.657936	-1.06747	0.179917	-0.664103	-2.36857	0.300179	-0.00496728
AC092794.1	-0.182281	1.01514	1.52057	0.251492	0.213362	0.119028	0.0535869	0.0156132
AC092802.1	-0.120439	1.2288	0.533242	0.232375	-0.186058	0.425174	0.0613667	0.372376
AC092802.2	0.0429516	1.90734	0.75429	0.434237	-0.422512	-1.34334	-1.29763	0.110633
AC092803.1	0.217613	0.775008	0.430405	-0.233146	0.00864433	0.779657	0.0162418	0.023403
AC092809.2	0.0603192	0.622263	0.0104213	1.13824	-1.38408	1.00571	1.03873	-0.112202
AC092809.4	0.208888	-1.25575	-0.820216	0.519187	0.121595	0.194655	-0.123714	0.818729
AC092821.3	-0.34533	-3.419	-0.86726	-0.154709	0.153076	-0.851585	-2.3038	-0.337817
AC092828.1	-0.931059	-1.63902	-0.240634	-0.0772282	1.7653	0.462388	-0.202418	0.0806281
AC092832.2	-0.129818	0.365044	0.267636	0.460068	-0.32632	-0.169008	1.6669	0.509021
AC092835.1	-0.0389699	-1.64431	-1.0742	-0.148604	0.155729	0.0057814	-1.03202	-0.836791
AC092839.1	0.0778195	1.2222	0.887504	0.438617	-1.22925	-0.04239	0.434792	1.17039
AC092844.1	-0.235229	1.44029	0.307508	-0.154491	-0.584163	-0.198201	-0.0708113	0.117943
AC092881.2	0.45152	0.434428	0.409035	-0.867122	-0.0147953	0.658912	0.692357	0.605384
AC092902.4	-0.387983	0.0576829	-0.173137	0.490649	0.00831951	1.01099	0.370755	0.592638
AC092910.3	-0.275306	-0.502048	0.428684	0.411574	-0.0638355	-0.143768	-1.98535	-0.10148
AC092943.2	-0.152624	1.00679	0.561065	-2.30265	0.0951664	1.1847	0.630314	0.562588
AC092944.1	0.00158685	-1.43093	-0.442664	0.49269	-1.10744	0.784251	2.44612	0.0633791
AC092969.1	0.688453	0.207447	-0.107337	0.0928095	0.555917	0.615228	0.470332	0.0131759
AC093019.2	-0.0465327	1.09279	0.839527	0.079352	0.246597	1.205	0.189558	0.613096
AC093110.1	0.0478005	1.00319	0.85187	-0.00364207	0.111904	1.13876	0.310065	0.702318
AC093151.8	-0.363198	-0.184156	0.187991	-0.728543	0.495639	0.967944	0.0544772	-0.100145
AC093157.1	0.258142	0.0583202	-0.0841793	0.126069	-1.44061	1.37001	0.572514	-0.307046
AC093158.1	0.0688702	0.992079	0.367255	0.948488	-0.183247	-1.76853	0.50908	0.476637
AC093159.1	-0.443937	-0.122591	-0.362047	1.4207	-0.279998	-0.164039	-0.11114	-0.353783
AC093206.1	-0.456926	0.0965257	-0.0580153	0.719949	-1.89533	-0.0162924	0.0689157	-0.847088
AC093227.1	-0.738106	-0.435856	-1.08183	0.471867	-0.721925	-0.757125	-0.0235382	0.112315
AC093227.3	0.32249	1.21253	0.370978	0.267108	-1.5333	0.0757992	0.422882	1.07375
AC093249.2	-0.0497124	0.405095	0.319678	0.321638	-0.0144691	-1.24712	-1.31109	-0.790878
AC093249.6	0.515598	3.51929	0.0713299	0.32597	-0.058333	-1.14774	0.0784961	-0.67929
AC093297.1	0.170136	0.842997	0.120304	-0.788358	-0.0537256	-0.217014	-0.0503526	-0.0294729
AC093297.2	-0.0584318	-0.147856	0.290092	0.517301	0.0753857	-0.356258	-0.950384	-0.363839
AC093305.1	0.147779	0.571977	0.340844	0.231823	0.0114989	-1.56645	-0.0329563	0.356827
AC093307.1	0.022443	1.2798	1.89702	0.297012	-0.637746	0.0507079	-0.067878	-0.443132
AC093323.1	0.553278	-0.443238	-3.05074	1.7568	0.27823	0.220305	-0.109711	-0.115771
AC093462.1	0.0820789	0.263774	-0.15145	1.57763	1.23073	0.627027	-0.0299599	0.0497965
AC093495.1	0.412539	1.59064	0.521057	0.208568	0.641367	0.22362	0.444448	0.695498
AC093496.1	-0.391076	0.366954	0.0578868	0.524738	1.05958	-1.87495	-6.58697	-0.175001
AC093512.2	0.0903966	1.11678	0.286023	3.18563	-0.00186781	-0.522218	0.063845	0.566568
AC093516.1	0.887841	-0.230311	-0.294917	0.925661	-0.393407	0.0719723	1.01292	0.137964
AC093525.4	-0.396537	0.400983	1.64033	0.055489	0.158615	0.76611	0.429692	0.367865
AC093525.6	0.315775	-0.697503	-0.509073	1.6561	0.0957372	1.69403	1.08488	0.561727
AC093535.1	-0.191409	-0.373277	0.0537857	-0.185015	-0.762726	-0.196894	0.264478	0.0124058
AC093567.1	-0.356371	0.317622	0.0886113	0.511873	0.61738	0.0265212	-0.43538	0.306558
AC093610.1	0.423529	-0.203512	0.139658	-0.922084	-0.0535847	0.087283	-0.0584059	-0.192537
AC093627.3	-1.21502	-0.722759	-0.671848	1.14861	-0.0713592	-0.473877	0.811558	0.00859873
AC093627.5	0.03696	0.131681	0.165463	-1.4196	-0.838409	1.48323	0.523486	-0.818598
AC093635.1	0.393523	-0.911819	-0.755703	0.343239	-0.0643928	0.553504	-0.557854	-0.468399
AC093639.1	-0.720011	-0.938975	-1.60902	2.4445	0.276468	0.00277112	0.761221	0.0075878
AC093677.2	-0.203452	0.0475016	-0.120223	-0.239346	-0.061388	1.4649	0.546027	-0.211763
AC093690.1	-0.0327163	1.16433	1.12762	2.26383	-0.0430243	-0.155306	0.37381	0.33374
AC093765.2	-0.0343951	1.90151	0.939257	-0.054019	-0.860367	-0.205675	0.662752	-0.0642478
AC093765.3	-0.137623	1.27357	0.451594	-0.37607	-0.538684	-0.668825	0.515167	-0.261026
AC093765.4	-0.604739	0.484196	0.584492	-0.0635427	-0.547019	0.00229693	0.535627	-0.539221
AC093765.5	0.0157112	0.413556	0.303794	-1.22028	-0.862585	-0.887281	0.329719	-0.0858811
AC093766.1	-0.118581	1.71129	1.69147	0.794961	-0.714231	-0.0183278	0.172062	0.505224
AC093797.1	-0.518351	0.311309	-0.0592005	0.0342138	-0.27047	0.237771	0.273376	0.500749
AC093802.1	0.228509	3.13048	0.318948	1.14167	-1.46752	0.0734428	1.17244	-0.108725
AC093821.1	0.0437683	0.450587	0.233886	1.02676	0.0735972	-0.0331716	-0.128687	0.221957
AC093827.4	-0.200458	0.53368	0.435443	0.419922	-0.392169	0.289493	0.642497	1.82237
AC093835.1	0.382081	-0.762165	-0.383576	-0.0800449	0.1258	1.53231	0.157839	-0.0363391
AC093849.4	0.132694	-0.991839	-0.242348	0.378186	0.181138	-0.156464	-0.345156	-0.721475
AC093865.1	-0.617661	0.295589	0.754795	0.102002	-0.0985641	0.455368	0.152815	0.0967015
AC093879.1	-0.0381095	0.963546	0.902701	-0.481433	-0.781546	0.784952	0.455165	0.727465
AC093895.1	-0.419728	-3.63717	-0.541728	0.753127	-0.36363	0.176601	0.302431	-0.0515969
AC093912.1	-1.01755	-1.17089	0.0961023	-0.229451	-0.617147	-0.75985	-0.76921	0.0397076
AC093928.1	0.629712	0.188935	-0.336317	-0.208512	-0.316438	0.475093	0.624859	-0.333826
AC095032.1	-0.535288	0.613537	0.773794	1.09205	-0.924136	0.573919	0.063353	-0.132807
AC095057.3	-0.088096	-0.480985	-0.530119	0.879232	0.471367	0.216555	0.179991	0.29274
AC095350.1	-0.00414891	0.776612	0.540065	1.09795	-0.194959	0.205885	0.550722	0.678546
AC096536.3	0.29633	0.157586	0.165834	-0.499738	-0.515724	-0.254194	0.0190988	0.343441
AC096555.1	-0.212025	-0.165876	-0.276334	1.83764	-0.0918569	-0.359464	0.219373	0.284549
AC096564.1	0.111546	1.72436	0.225294	0.0594127	-0.168963	1.07848	0.106141	-0.231642
AC096576.2	-0.0263561	0.864323	0.453699	-0.674426	-0.441296	0.123709	0.829501	1.07658
AC096576.3	-0.0574842	0.83045	0.440621	0.156592	0.0339193	-0.161981	0.566821	1.21888
AC096576.6	-0.849507	-0.682393	-0.675707	-0.0442133	0.513846	-0.0336632	0.845341	0.643398
AC096642.1	-0.203288	-0.817573	-0.0228369	5.48836	1.79851	-0.341109	-0.992925	-0.0216784
AC096667.1	-0.292657	0.0574097	-0.0930716	0.141113	0.687834	0.0107288	-0.530625	-0.149288
AC096677.1	0.156505	0.0970521	-0.619064	0.530457	0.00753004	0.570807	1.20628	0.200176
AC096711.2	-0.172869	0.333997	0.383722	2.63684	0.175287	1.16709	-0.283364	0.265833
AC096719.1	-0.540407	-0.43507	-0.0407018	0.170912	-0.609377	0.262984	0.638505	0.222484
AC096733.2	0.0691416	0.989715	1.72558	0.519235	-0.334826	0.865823	0.20723	0.763892
AC096747.1	-0.037009	0.813161	0.550706	0.72373	-0.246957	1.04862	1.1422	0.228085
AC096751.2	-0.074952	0.164653	0.467115	0.667626	1.23605	-0.129152	0.0445971	-0.483235
AC096992.2	-0.396777	0.991664	0.97853	-0.0754672	-0.601064	0.0733992	0.468643	-0.0459426
AC097376.3	-0.370097	-0.0680397	-0.106611	0.381107	-1.83535	0.117864	0.333686	0.26166
AC097382.2	1.30219	0.0355401	0.081898	3.80927	-0.0508787	-0.11499	0.444183	0.63245
AC097382.3	1.62865	0.0104688	-0.248718	0.362674	-0.0148126	-1.08063	-1.53786	-0.0221215
AC097448.1	-0.101394	1.30231	1.88967	1.26586	-0.282293	-0.291278	-0.403897	0.319924
AC097460.1	-0.445011	-2.42446	-0.841847	-0.453088	-1.15302	-0.0957189	3.89056	-0.0710236
AC097467.3	-0.00136644	0.934906	0.664591	1.51828	0.0650548	1.43404	0.631126	0.324656
AC097468.2	0.631281	-0.248559	-0.161908	0.660611	0.167719	-1.47585	0.0759236	0.987303
AC097500.1	0.0324197	-0.943521	-1.19839	0.173001	-0.207941	-1.39015	0.0348836	0.222761
AC097515.1	-0.768898	-0.276214	-0.333014	-1.25071	-1.14395	-1.03025	1.28259	0.212945
AC097518.2	0.819478	0.0837403	0.30053	0.195451	-1.34685	0.774966	0.961348	-0.224372
AC097522.2	-0.121414	0.445589	0.23004	-2.80997	-0.311604	1.18012	2.09984	0.746344
AC097532.2	0.280406	-0.465761	0.103517	-0.0175312	-0.463448	1.31105	0.569205	-0.192388
AC097532.3	0.400734	0.598975	-0.360173	-0.403524	-0.030992	0.251629	0.489475	-0.145376
AC097534.1	0.147133	-0.0883179	0.117741	0.270305	0.830491	-0.36272	0.0258882	0.54538
AC097534.2	0.245703	-0.677812	-0.573305	4.02145	0.844269	-0.123942	-0.374642	-0.784686
AC097537.1	-0.000807858	1.18409	0.919393	-0.198985	0.018201	0.294985	0.772917	0.514852
AC097634.3	-0.0320438	0.819417	0.312909	0.462557	-0.704104	-0.0310009	0.804529	0.850043
AC097654.1	0.308714	0.011602	0.128968	0.0977622	0.456404	1.15059	2.62409	-0.275418
AC097662.1	0.0115287	1.68365	0.562882	1.46459	0.205117	-0.180309	0.19231	-0.475928
AC097716.1	0.0590682	1.41093	1.30856	1.27648	-1.90728	0.0212199	0.0278565	1.1679
AC098484.4	-0.104366	1.09206	0.551012	-0.363978	-0.519526	0.188201	1.69147	0.892385
AC098487.1	-0.0805735	0.20465	0.0735506	0.138035	0.0649322	0.639681	-0.390879	0.142513
AC098588.3	-0.0601513	2.05624	0.510842	0.0742202	0.094881	-0.0910599	0.0825395	0.914727
AC098617.1	0.0298895	1.26346	0.893359	0.147201	-0.184057	0.17008	-0.00851804	0.642924
AC098829.1	0.274956	-0.0771743	-0.930396	1.50525	0.0223916	-1.44404	0.112032	-0.997059
AC098851.1	-0.180064	1.90962	1.06498	-0.234175	-1.71296	0.0822172	0.466118	0.408336
AC099329.1	0.308962	0.869792	0.753725	0.163644	-0.405566	0.354067	0.450588	0.252178
AC099343.3	0.111968	-0.558842	-1.01598	-0.106022	0.531169	0.121895	-0.0322447	0.0616742
AC099344.1	0.119891	0.779994	0.377567	0.0368713	-0.0250282	0.822063	-0.00409848	0.86339
AC099501.1	0.0118681	0.754329	0.553751	0.124649	-0.0659845	0.83983	0.362087	1.03755
AC099520.1	-0.41918	0.586919	0.700909	-0.58207	-2.13763	-0.39326	1.1485	1.41792
AC099522.2	0.240746	-0.520563	-0.6943	0.231164	1.77966	-0.403516	-1.66197	-0.0326662
AC099535.2	0.0255044	1.49216	1.50936	-0.502352	-0.00365724	-0.795797	-0.152997	0.80736
AC099661.1	-0.342398	-0.356087	-0.782148	2.11582	0.202108	-0.318494	-1.03418	-0.0735591
AC099684.2	-0.230164	0.195369	0.075478	2.33436	0.0533542	0.0931802	0.21273	0.176176
AC099778.1	0.797771	0.194997	0.403576	0.325768	0.0580021	-0.014772	-1.28239	-0.563679
AC099782.2	-0.180216	0.725024	0.0979771	-0.529413	0.483189	2.08086	1.97746	1.09547
AC099788.1	-0.735916	0.190762	0.0581523	-0.345866	-0.160501	-0.251813	0.506391	0.659128
AC099791.2	0.333533	2.37084	0.776371	0.272409	0.103204	-0.875813	0.0785954	-0.108081
AC099792.1	-0.561926	0.192646	0.106736	0.287153	-0.384489	-0.676086	0.148645	1.49263
AC099850.1	0.022837	0.390718	0.617755	-0.0919025	-0.0361668	0.220141	-0.168828	0.0819762
AC100763.1	0.0248372	1.56456	0.907501	0.46249	-0.387081	0.0855839	0.197745	0.465888
AC100771.2	-0.534025	1.0224	3.26307	0.270625	1.36613	2.32139	0.0374906	-0.37264
AC100786.1	1.15143	-0.287397	-0.190133	0.342251	-0.00666791	-0.01293	-0.413537	0.654052
AC100793.2	0.307946	0.341696	0.225566	0.0403198	-0.091176	1.31436	0.070055	0.41672
AC100793.3	0.0107657	2.44676	0.880272	-0.110258	-3.43482	-0.237758	0.344687	2.19911
AC100800.1	0.0709307	1.21787	0.829196	-0.20263	0.165556	0.227493	0.685239	0.733104
AC100803.2	0.0125965	0.318326	0.046274	0.364256	0.966376	-0.922323	-0.00781677	0.976241
AC100803.4	-0.300767	-0.117568	-0.0439867	0.102833	-0.13556	0.0565645	0.785577	-0.0546718
AC100805.1	0.305649	-0.0223021	-0.442421	-0.0275552	-0.115101	0.763271	-0.60821	0.551776
AC100810.1	1.0083	0.920292	0.461938	-0.204734	-0.704586	-0.585578	-0.203929	-0.506984
AC100814.1	-0.29051	1.28459	1.27172	-0.170129	-1.29152	-0.181226	0.154502	0.229294
AC100830.1	0.847679	0.581	-0.622604	-0.000120922	0.840524	0.0111258	2.3759	0.162362
AC100832.2	-1.09159	0.265947	0.452052	1.31527	-0.83719	-0.824332	0.135483	-0.472982
AC100863.1	-0.957722	0.00179444	0.289758	1.61492	0.272787	-0.722664	-0.339505	0.440501
AC102953.2	0.927868	0.308932	0.244028	-0.942422	0.264478	1.64701	0.682252	0.326796
AC103703.1	-0.448191	0.0415113	0.749216	0.00422771	0.108354	0.836751	1.3743	1.30274
AC103706.1	-0.00856541	0.556518	0.596781	0.0249752	0.839936	0.566122	-0.529498	0.349809
AC103726.2	0.0375339	1.12548	0.459141	-0.138129	-0.368525	-0.234599	-0.250266	0.367512
AC103739.2	0.0895344	0.606446	0.515987	-1.26519	0.159058	0.16884	0.253387	0.671625
AC103740.1	-0.437688	0.74482	0.277883	-0.198448	-0.0331398	0.173971	0.17846	-0.267308
AC103758.1	-0.016228	-0.290269	-0.517528	-0.579006	0.645189	-0.814632	0.818429	-0.366008
AC103794.1	-0.122276	0.40623	0.441635	-0.422535	0.180858	0.755274	0.405269	1.06782
AC103810.2	-0.229084	0.741824	0.610877	1.93972	0.0963251	0.184753	0.281133	0.407792
AC103876.1	-0.0493551	0.956008	0.195221	0.962321	-1.21916	-1.12223	0.00993068	0.966408
AC103923.1	-0.0392521	0.267194	0.135769	-0.0103034	0.206674	-0.0532787	0.0614302	-0.0326114
AC103974.1	-0.115361	1.4923	0.735202	0.0254477	-0.378244	-0.94491	-0.406502	-0.0309507
AC104009.1	0.131631	1.44791	0.24251	3.51031	0.37324	-0.225456	0.227923	0.213953
AC104035.1	-1.06643	-3.00126	-0.905647	0.513076	0.0392532	0.589539	0.758973	0.523373
AC104041.1	-1.61734	-1.27842	-1.82268	0.123299	-0.755607	1.60973	0.684578	0.861682
AC104066.4	0.279657	1.11299	1.01151	-0.450182	-0.262347	0.399984	0.157152	1.07423
AC104083.1	-0.475023	-0.0989919	0.171083	-0.0599828	0.105127	0.0523279	-1.17924	0.178399
AC104117.3	-0.106542	2.32464	0.481335	-0.0489927	-1.2877	-0.185485	0.264139	0.321867
AC104123.1	-0.520215	0.714025	0.741831	0.389054	-0.71025	0.518547	0.083405	-0.423296
AC104126.1	0.257348	0.678919	0.113814	0.650279	0.451636	0.116626	0.492514	1.14625
AC104134.1	-0.0527766	0.679156	0.720433	1.47217	0.0711269	-1.41669	0.196948	0.750662
AC104135.1	-1.00876	0.0221508	-0.0959067	-0.958999	1.84819	-2.2175	-1.48159	0.910267
AC104162.2	-0.0554758	0.17961	0.136142	0.865744	-0.783336	-0.17795	0.0323775	-0.630751
AC104170.1	-0.0723274	0.159091	0.0142455	0.179003	-0.094478	-0.120039	1.82664	1.19089
AC104187.1	-0.0364483	-0.172113	-0.159569	-0.231095	0.571042	-0.770825	-0.737009	0.699814
AC104211.1	-0.825813	-0.125752	0.371602	-0.509656	-0.127554	-1.09097	-0.283373	-0.235051
AC104232.3	0.214748	-0.0723555	-0.743964	0.0407704	-0.206385	-1.68043	0.318731	0.261375
AC104316.1	0.00881192	0.996539	0.891374	0.59341	-1.53745	0.303924	0.64363	0.349786
AC104335.1	-0.0695452	1.24665	0.917889	0.789605	-0.332591	0.102413	1.37885	0.922228
AC104335.2	-0.0577393	1.42536	0.221443	-0.0633508	-0.00200043	0.441558	0.944437	-0.0112269
AC104365.1	-0.0184484	0.974298	0.531542	1.63478	-0.157577	-0.37814	0.19495	0.375329
AC104461.1	-0.0664179	1.58128	1.47489	-0.0466328	-0.0742164	0.229098	-0.189108	0.134013
AC104463.2	0.668641	0.271709	0.489389	0.447991	0.287296	0.463592	-0.0670402	-0.0807964
AC104506.1	1.60898	0.0271256	-0.584959	0.153718	-0.109851	2.14187	0.598689	0.29175
AC104530.1	0.872429	0.347528	0.563723	1.08055	0.621011	0.592999	-0.222581	-0.0718761
AC104532.2	0.122533	1.49442	1.08185	-0.230502	-0.0918689	0.0769322	0.415028	-0.0247443
AC104574.2	-0.904802	0.548842	0.235975	-1.49159	-0.986034	-0.416481	0.843938	0.66479
AC104596.1	-0.626973	-2.68932	-1.12251	-0.0525621	-0.957813	-0.959367	1.36009	-0.135775
AC104655.1	0.436135	1.48307	0.592982	-0.118193	-1.18107	0.00723474	0.0255685	0.0192918
AC104667.1	0.247722	1.08061	0.900505	-0.232728	0.162464	0.48703	0.97805	0.86167
AC104667.2	-0.0234902	0.269477	1.12013	-0.320516	-0.0959861	-0.651672	-0.110443	-0.936633
AC104699.1	-0.063661	1.20953	0.806194	0.128262	-0.415845	-0.0903591	0.457156	0.73702
AC104781.2	-0.0033747	1.37529	0.734618	0.294351	0.87026	0.180759	0.137873	0.940126
AC104794.3	0.111822	-0.589682	-0.533846	0.112367	0.088371	0.537818	0.21647	-0.142365
AC104803.1	-0.0579085	1.06549	0.679208	0.511634	-0.637976	0.799189	0.972815	0.847164
AC104806.2	-0.508903	-0.342214	0.27896	-0.273838	0.343924	-1.94344	-0.105531	0.111792
AC104825.1	-0.318344	-0.682741	-0.0588961	0.108763	0.31798	2.5832	0.323877	0.493947
AC104827.1	-0.171345	0.441112	0.586972	0.934002	-0.366992	0.000450737	0.174339	0.755936
AC104850.2	0.716957	0.825635	0.98169	0.944672	-0.634816	0.169714	0.0841688	-0.298232
AC104938.1	-0.445594	-1.22357	-0.327615	-0.0528711	-1.50349	0.242586	-0.0643795	-0.170415
AC104958.1	-0.517099	0.148991	0.531896	-0.665229	-1.79584	-0.672396	0.211057	0.0650002
AC104964.1	-0.889634	0.297658	0.962935	0.255031	-0.174775	-1.14771	0.121436	-0.904717
AC104964.3	-0.165413	1.61897	0.329738	-0.606096	-0.0707761	0.654409	0.77398	-0.42065
AC104982.2	-0.115095	1.62023	0.923765	0.783927	-0.271111	0.203731	0.184768	0.350716
AC104984.2	-0.157688	0.360602	1.86119	0.461558	0.229598	1.61046	0.00232431	-0.600478
AC104984.3	0.304662	1.26209	1.20626	-0.0709597	-0.545098	0.0946412	0.831566	0.962126
AC104984.5	0.0393014	1.76818	0.53179	2.61227	-1.88541	3.04535	3.41389	0.582267
AC105001.1	0.184612	1.33482	0.833093	-0.168822	-0.142835	0.775141	1.85447	2.86378
AC105052.4	-1.95089	-0.143061	-0.298051	-0.237248	-1.7118	-0.0642188	2.48847	0.720133
AC105052.5	-0.323146	-1.58701	-1.1875	-0.101828	-0.128394	0.443472	0.512534	0.657346
AC105094.2	-0.147133	-2.72918	-0.361181	1.31027	0.305307	0.180621	0.607698	-0.182645
AC105114.2	0.132791	1.2249	1.00823	0.331348	-0.401876	-0.331138	-0.13013	0.768272
AC105180.2	-0.211154	-1.58977	-0.290243	-2.4477	-0.144711	0.329892	0.828128	0.503234
AC105206.2	0.00822995	0.909828	0.866052	-0.117737	-0.174384	0.321546	1.66889	0.123712
AC105230.1	0.0157511	1.24331	0.54435	1.63552	-0.0539227	-0.184983	0.0615514	0.479569
AC105254.1	0.012009	1.30691	0.664559	-0.308614	-0.0515363	0.521108	0.261659	0.031485
AC105275.1	-0.116343	-0.0223595	-0.341096	-0.0318533	-0.347334	0.316183	0.0897651	-0.172217
AC105285.1	-2.61491	-0.416309	0.915907	0.266715	0.308527	-0.748414	-1.39785	-0.643583
AC105339.3	-0.00588199	1.09864	0.489128	0.444447	-0.197002	0.637289	2.09364	0.97742
AC105339.6	-0.0195273	1.01876	0.496756	-0.0447147	0.0706522	0.26842	0.18557	0.258599
AC105345.1	0.272222	0.0274022	-0.0802948	-0.930977	0.24236	0.116262	-0.318372	-0.653746
AC105383.1	0.607396	-0.897271	-1.27794	0.0503966	-0.115728	-0.420282	-0.0512328	-1.69677
AC105402.3	-0.0603565	0.969729	0.536424	14.9061	-0.107706	1.18843	0.0224529	0.146425
AC105402.4	-0.0934973	0.920242	0.580406	-1.23551	-0.7564	-1.28267	0.0352622	0.283467
AC105411.1	0.821322	-0.518998	-1.74525	0.701298	-1.35809	-3.62345	-0.597387	0.255297
AC105429.1	-0.678081	-0.973335	-0.577596	-0.0304252	0.0476401	0.248523	0.0634345	-0.0901919
AC105430.1	0.0633832	-0.439297	-4.03311	-0.024008	-0.0553565	0.310652	2.32017	0.00685585
AC105460.2	0.0753571	1.39162	0.467839	-0.387082	0.483576	0.135478	0.968983	0.661075
AC105916.1	-0.910566	0.25699	-0.276496	-1.51875	0.299567	-0.573152	0.513777	0.185123
AC105942.1	-0.281458	0.818293	0.519086	0.273528	0.34013	-2.05826	-0.173313	0.264613
AC106037.3	0.00639505	0.0727589	0.039062	3.63754	1.25506	-0.297291	-1.34974	-0.440251
AC106052.1	-0.0464201	0.240517	0.0953507	0.46824	-0.271371	0.449562	0.0476079	-0.665026
AC106707.1	0.178884	1.81823	1.60292	0.211095	-0.186106	-0.0626639	-0.283953	-0.125479
AC106729.1	-1.80466	-0.104432	0.33236	-0.342377	-1.95123	-0.237755	-0.152194	0.0477121
AC106738.1	-0.64582	-0.041391	-0.276634	3.79755	0.135204	1.01452	1.34571	0.570005
AC106779.1	-0.0371781	-0.850695	-0.14604	1.15782	0.616846	-0.0794274	-1.21041	-0.0245395
AC106786.2	-0.510876	-0.818079	-0.0770592	-1.29673	-0.0760933	0.471355	-0.216736	-0.613841
AC106791.1	-0.286131	-0.16086	0.00692022	0.623841	0.574069	-2.28681	-0.144333	-0.846717
AC106793.1	-1.61789	-0.618403	-0.468191	-0.658687	-1.15198	0.0929951	0.61701	0.422055
AC106795.3	-0.508583	0.146938	0.461975	-0.0735179	0.318517	0.245418	0.563395	-0.736291
AC106801.1	-1.39093e-05	0.852645	1.22089	-2.30143	-0.40987	0.232861	0.375196	1.5498
AC106818.2	-0.046779	1.09575	0.999045	-0.0180784	-0.232119	0.631355	0.254578	0.42603
AC106820.4	-0.306785	-0.696272	-0.275599	-0.152737	0.521973	0.056807	-0.0541071	0.497541
AC106873.1	-0.0362934	1.23547	0.57156	1.76507	-0.390418	0.472318	0.380426	0.664576
AC106886.3	0.135858	-1.27864	-1.64815	2.90056	-0.317948	0.0361658	0.288485	-0.842085
AC106897.1	0.067424	-0.389087	-1.05766	2.07871	1.75843	-2.95509	-0.813807	-0.731668
AC107021.1	-0.00304159	0.982681	1.17484	0.122171	-0.141263	-0.0295033	0.633256	0.62151
AC107032.2	-0.301979	0.55491	0.669252	-0.390672	0.0512169	0.664139	2.18744	0.355449
AC107068.1	0.919556	-0.257563	-0.579932	1.11508	-0.580316	-0.152586	-0.241074	0.343283
AC107068.2	-0.000534935	1.1561	0.918564	0.440898	-0.927412	0.568945	0.267866	0.668588
AC107072.2	0.0368266	1.40283	1.06077	0.218587	-0.437023	-0.0316484	0.180297	0.876658
AC107081.2	0.0234031	0.600326	0.406311	3.56444	0.554067	0.890659	0.0591786	0.0656216
AC107204.1	-0.724211	-0.833665	-0.500155	-0.18311	-0.225562	1.12016	0.542613	1.53197
AC107208.1	-0.27101	0.268753	-0.163316	3.77423	1.05	-0.0958885	-0.787422	-1.52337
AC107214.1	-0.178052	1.62152	1.1332	0.624758	-0.0690582	-0.192096	-0.00454984	-0.319735
AC107223.1	-0.717896	-2.38395	-0.452364	0.302276	-0.490324	0.221581	-0.189547	-0.326721
AC107294.2	-0.137182	-0.477259	0.385313	0.020701	-1.03442	0.162713	-0.163775	-0.506081
AC107375.1	0.245488	-0.81733	-0.868993	0.576486	0.0565443	0.767786	0.498943	0.0149869
AC107419.1	-0.108158	2.76247	1.00754	3.90284	-0.143958	-0.710773	-0.131523	-0.353045
AC107464.1	0.584447	-0.127682	-2.41719	2.04455	-0.160443	-0.622097	1.59251	0.0816324
AC107464.3	-0.416359	0.168694	-0.0440935	0.737524	-0.0304387	-1.13665	0.185383	0.146067
AC107871.2	1.05215	2.01507	1.03547	-0.261633	0.50488	-0.311192	-0.279208	0.16514
AC107884.1	0.0270391	1.59645	0.967711	2.24506	-0.342677	-0.056976	-0.0316632	1.96927
AC107952.2	-0.0345319	0.683874	0.689833	1.11456	-0.24875	1.09994	-0.00350965	-0.153227
AC107959.1	-0.286159	0.121806	-0.119842	1.13862	-0.114518	0.0333588	0.562578	0.173877
AC107973.1	-0.115222	1.94413	1.05468	-0.466846	-2.67694	-0.327376	0.892676	0.666844
AC107993.1	-0.213712	0.263537	0.0368341	0.422603	0.219928	0.146162	0.341111	-0.174091
AC108047.1	0.418441	0.245704	-0.010193	0.144499	-0.27208	-0.413554	-0.219957	0.121352
AC108057.1	-1.0414	0.128591	-0.192955	0.382647	0.0509265	0.249626	-0.1721	-2.95574
AC108058.1	-0.0167873	1.62584	1.02104	-0.355861	-0.625059	0.66466	0.785573	0.874013
AC108134.3	-0.27342	-0.19323	0.213727	-0.0875158	-0.511568	-1.17879	0.0354701	-1.70916
AC108156.1	0.0320568	2.34014	0.365046	0.717027	-0.170574	0.990527	0.618603	0.147839
AC108159.1	-0.143522	0.97605	1.11741	-0.895256	0.709346	-0.0233306	-0.166968	0.0989179
AC108169.1	-0.553801	-0.610388	-0.654326	3.60009	0.0272314	-0.010098	-0.246544	-0.785619
AC108449.1	0.183441	2.45929	1.23686	-0.699432	-1.61192	0.135354	2.18037	0.617302
AC108451.1	0.0229988	0.640528	0.254359	-0.241891	-0.0358132	-0.115701	0.473456	1.80689
AC108471.2	0.297814	-1.70359	-0.916702	1.54856	-0.576308	-0.124212	0.613889	-0.396337
AC108471.3	0.423788	1.16756	0.445119	-0.329586	-0.554432	-0.14232	0.353529	0.567415
AC108472.1	-0.0311123	0.682571	0.411513	-0.35778	-0.21584	0.104867	0.418023	0.460162
AC108488.1	0.551581	-0.00645803	-0.200826	0.947937	0.0806233	0.454509	0.845909	-0.244867
AC108488.3	0.103866	-0.986533	0.0126256	0.516389	0.541444	0.896247	-0.0077923	0.0219343
AC108519.1	-0.206423	-0.495193	0.0768611	-2.32217	-0.414822	-2.0635	-0.502469	0.397278
AC108673.3	-0.0212063	0.591331	1.24212	0.947125	0.205036	0.317384	0.387233	-0.606458
AC108690.1	0.125392	1.15262	0.96754	0.411522	-1.63675	-2.6953	-0.14258	0.564521
AC109129.1	0.0744176	1.25926	0.589673	1.24435	-1.75443	0.26617	0.290682	1.16462
AC109322.1	0.0287962	0.118239	0.275796	0.634837	0.0120468	0.693512	-0.434166	-0.208776
AC109322.2	-0.105423	2.02792	0.860929	0.177431	-0.230462	0.469768	1.11443	0.776844
AC109347.1	0.063551	0.598045	0.436837	1.86677	0.517716	0.459136	-0.151984	-0.137113
AC109361.1	-0.420087	-0.990899	-0.262645	-0.750851	-0.149027	0.895313	1.65307	1.0474
AC109439.2	-0.422944	-0.262895	0.018146	-0.558764	-0.189249	-0.347841	0.958999	0.228628
AC109441.1	-0.0734208	1.13337	1.17759	-1.1253	-0.3273	-0.135562	0.243705	0.517361
AC109446.3	0.246901	1.82319	1.06507	-2.44169	-0.469351	0.743257	-0.125602	0.402809
AC109454.2	-0.0643153	1.25703	1.9115	-0.0196148	0.678674	0.566443	0.984237	1.40647
AC109454.3	-0.335943	0.76753	0.248932	0.383203	-0.248268	-0.187928	0.090098	0.0960042
AC109460.2	0.0126011	2.00099	0.830714	0.761212	-0.242345	0.681137	0.422262	0.573663
AC109462.1	-0.646624	-0.162339	0.128094	-0.291879	0.838915	-0.645737	-0.0172333	0.286943
AC109466.1	-0.972754	0.107816	-0.00629556	1.14252	-0.204601	0.0802923	0.717875	0.744482
AC109587.1	0.273111	1.05394	0.347403	0.113058	0.0852032	0.708196	0.0606366	0.32249
AC109597.1	-0.0438462	1.27139	1.01489	-0.0440622	-1.11323	1.15476	0.325212	0.516457
AC109811.1	0.0120387	1.27377	0.817443	0.824553	0.0881316	-0.0965055	0.162852	0.72244
AC109927.1	0.0387626	0.373934	0.527471	-1.03207	-0.138279	-0.101502	0.470728	0.174047
AC110015.1	0.121864	1.13128	0.716856	1.00517	-0.659492	-0.109212	-0.0451025	0.515538
AC110285.1	0.117821	-0.39389	-0.128095	-1.43632	0.85271	-1.14858	-0.588347	-0.0273942
AC110285.2	0.450096	2.2437	0.0663852	1.48716	-0.261889	-0.838485	0.449229	0.824076
AC110296.1	-0.023443	1.1685	0.667938	0.180977	0.0404907	-0.613593	0.125971	1.29834
AC110491.2	0.0485574	1.00013	0.475316	0.00702196	-0.0658325	-0.250298	0.00958919	0.0703567
AC110491.3	0.0137091	0.886219	0.45477	1.64297	0.70232	0.20221	1.09014	0.18084
AC110611.1	0.0123659	1.1994	0.713926	0.93024	0.0283524	0.0851043	2.22321	1.84241
AC110716.1	0.493836	-0.0317363	-0.944809	0.208298	0.141198	-0.0186824	0.0458614	-4.24538
AC110760.1	-0.0932241	0.339978	0.321145	-0.354652	-0.550979	0.0692584	0.277741	0.022295
AC110769.2	-0.0237037	0.911871	0.886885	-0.304011	-1.28905	-0.216155	-0.846118	-3.51553
AC110772.2	-0.446487	-1.50226	-0.785848	0.107526	-0.31373	0.234646	-0.167962	-0.990589
AC110795.1	-0.102414	0.949768	0.825847	0.0960547	-0.592591	0.193609	0.299866	0.799537
AC110995.1	-0.200759	2.03643	1.35717	-0.302553	-0.986583	-0.542489	0.0588377	0.151879
AC112178.1	-0.34712	-2.18569	-0.177892	-0.103545	-0.0975606	-1.5812	-0.227946	0.0859926
AC112196.1	0.0112233	1.38137	1.3065	1.05961	-0.658439	0.273701	0.542503	-0.0605599
AC112206.2	-0.427148	0.165189	0.0637803	0.178205	1.39479	-0.225418	-1.63787	-0.798194
AC112220.2	0.191363	-1.09597	-6.65961	-0.195038	-0.18704	-2.09591	-2.10126	-0.0319739
AC112481.2	-1.72828	0.265837	1.09483	-0.128721	0.0937336	-0.454117	-0.792257	-0.171393
AC112493.1	-0.406799	1.92176	1.02256	1.51237	-0.11276	-0.599143	-0.128163	-0.0175321
AC112503.1	-0.0798358	1.19788	0.754093	0.891658	0.0198337	0.240211	0.119029	0.0121906
AC112719.2	0.18305	0.0386981	-0.1126	0.227684	-0.34226	0.664124	0.331573	0.145049
AC112722.1	0.508127	0.423083	0.200678	2.69674	-0.389987	0.101159	0.400939	0.117708
AC112907.3	0.0419557	-0.514635	0.210822	0.303393	0.297289	1.265	0.149864	-1.30137
AC113137.1	-0.248465	-1.38486	-1.55605	0.155146	-0.0701566	-0.281419	0.983271	0.170521
AC113143.3	-0.514273	0.735561	0.408203	-0.771382	-1.40852	0.410653	2.98221	0.551879
AC113383.1	-0.826699	0.915341	1.14971	-0.258331	-1.12871	-0.293675	0.806582	0.0533832
AC113385.1	0.0626983	1.14474	0.420296	0.389114	-0.543804	1.11137	0.822788	0.211849
AC113386.1	-0.0120741	0.965784	0.786443	-0.266317	-0.870726	0.11403	0.298894	0.453176
AC113410.4	0.484664	-0.0291988	0.0861058	0.273583	-0.0418308	0.113979	-0.169944	0.0279338
AC113414.1	0.227373	-0.497296	-0.402739	-0.115967	-1.16644	-0.443274	2.19698	-0.0639596
AC114316.1	-0.183244	1.278	0.852801	0.789203	-0.447661	-0.694949	-0.0765209	0.196177
AC114546.1	-0.286407	0.650369	0.65981	-0.158802	-0.111788	-0.296881	1.63592	0.433755
AC114689.3	-2.03429	-0.456521	-1.69845	0.159252	0.455606	0.721875	0.6482	0.408033
AC114763.1	-0.211926	-1.05938	-0.112636	1.00369	-1.19127	0.0367435	-0.0735508	0.364211
AC114781.2	-0.349261	0.165283	0.593238	0.334879	-2.03569	0.201201	0.186253	0.359275
AC114803.1	0.443651	-0.0149428	0.0565709	2.43483	0.0473481	0.220524	-0.0607418	-0.45291
AC114811.2	-1.45145	-1.24261	0.220977	0.246828	0.030134	-1.45535	-0.560468	-1.62305
AC114930.1	-0.991768	0.422983	2.18141	0.200191	0.212522	0.41989	0.0826573	0.384745
AC114939.1	0.227775	1.6788	1.3312	-1.63711	-1.22674	-0.208511	0.0326089	0.704475
AC114956.3	0.174086	1.18472	0.800193	0.117436	-1.35058	-0.19943	1.28866	-0.166106
AC114971.1	-0.721009	-1.43043	-1.89044	-0.222083	2.24158	0.898028	-0.384449	-1.08575
AC114980.1	-0.14754	-0.583962	-0.31126	-0.587928	-0.828736	0.463221	0.318722	0.413935
AC115284.4	0.0699926	-1.40166	0.0115255	0.119541	-0.435146	0.801264	0.345425	1.45383
AC115618.1	0.25004	-0.299316	-0.128956	-0.0510332	0.120889	1.3854	0.235038	-0.0164126
AC115622.1	0.0259045	-0.45777	-0.734181	1.57647	0.32048	0.376384	0.968217	-4.37251
AC116099.1	1.23382	0.519633	-0.0179155	0.868504	-0.160635	0.0992917	0.370372	-0.300886
AC116158.3	0.0842147	0.558457	-0.0283604	1.91568	0.193325	-0.838546	0.103072	-1.47104
AC116348.2	-0.0955337	-0.116353	-0.791615	-0.110008	-0.0304168	0.449776	1.09508	0.502428
AC116348.3	-0.163312	-0.161088	-0.901009	0.1716	-0.532684	0.0113046	0.123336	0.800387
AC116362.1	-0.272373	-0.428675	0.270225	-0.58677	-1.79351	-0.878445	0.241822	0.0728428
AC116407.1	-0.0575567	1.04621	0.134802	0.184723	-1.21872	0.804713	-0.16513	0.593068
AC116407.2	-0.470799	0.61074	0.565841	2.04721	0.1694	0.0503546	-0.506434	-1.31935
AC116428.1	-0.0885252	0.775981	0.188205	5.29763	0.437159	0.624636	0.184876	0.0279119
AC116534.1	0.708411	0.937493	-0.00514165	2.51486	-0.100792	0.354991	0.602719	0.265994
AC116535.1	0.00112514	1.333	0.891034	-0.403236	-0.09257	0.750072	-0.0589032	1.15413
AC116552.1	2.61735	0.518742	-0.236691	1.03502	-0.0239893	0.0518453	0.321404	0.554243
AC116565.1	-0.410679	0.441699	0.493597	-0.797444	2.3014	0.0158116	-0.28941	0.566859
AC116616.1	0.596121	1.95757	0.830457	-0.106674	-0.634414	-0.159717	1.10581	0.369049
AC116667.1	-1.41369	0.0404155	0.327408	0.508901	0.357679	0.892749	0.649598	0.145196
AC116903.2	-0.19059	0.316857	0.265155	-1.91857	2.31498	0.045845	0.231949	0.634035
AC116913.1	0.617902	0.263198	0.615487	0.100371	-0.035437	0.525854	-0.648222	0.0664756
AC117382.2	-0.614731	-1.07911	-0.700643	0.0615601	-1.86905	-1.24034	-0.0788756	-0.0982209
AC117383.1	-0.105885	0.973301	0.594911	-0.713525	0.197189	0.499447	1.00396	0.217145
AC117453.1	-0.316442	0.526038	0.863625	0.652677	0.280126	0.326895	0.096826	-0.0129589
AC117460.1	-0.033321	1.56211	0.671018	-1.33166	-0.481219	-0.805906	1.56288	1.17582
AC117480.1	0.194189	1.79189	0.85041	-0.198076	-0.821474	0.284578	3.91272	0.12951
AC117481.1	-0.634439	-1.18738	0.295993	0.574739	1.44155	-0.154334	-0.238407	1.1453
AC117528.1	0.358477	0.392944	-0.168453	3.20943	-0.0603226	2.16666	0.951888	1.58593
AC117834.1	-0.0667701	1.27481	1.10178	-0.00907029	-1.88857	-0.25759	0.036501	0.415193
AC117834.2	-0.052046	0.913663	0.982774	-0.0847472	-0.739686	-0.414405	0.825206	0.593808
AC117944.1	-0.102514	1.39808	1.23124	0.26748	-0.634694	0.334651	0.121427	0.817874
AC118549.1	-1.61182	-0.0287328	0.0265629	0.395246	-0.729288	-0.278921	1.35366	-0.0875978
AC118553.1	0.0147724	0.0767199	-0.238396	0.510587	-0.0656948	-0.446167	-1.37893	-0.666736
AC118555.1	-0.0310576	0.923139	0.72982	0.438477	0.121455	0.611999	0.432273	1.25529
AC119396.1	-0.0835005	0.92162	0.700591	-0.767911	-0.321842	0.343888	2.05088	0.72286
AC119403.1	0.819687	0.596727	0.0930442	-0.263194	0.721153	-0.198514	0.116866	-0.208418
AC119673.2	-0.203267	0.0523169	1.26406	-0.131907	0.306276	0.122235	0.738568	-0.42506
AC119674.1	-0.309405	0.439465	0.666961	-0.17099	-0.355622	0.253518	-0.222966	0.752247
AC119868.2	-0.092659	1.1534	0.789409	0.524982	-0.365878	-0.136174	0.29855	0.247414
AC120036.4	0.209233	-0.589312	-0.723136	0.337113	0.21647	0.0182168	-0.136787	-0.102555
AC120053.1	-0.423949	0.915483	1.0569	0.160716	-0.299989	0.167742	0.812632	0.175602
AC120193.1	-0.102623	-0.59556	0.579051	0.245595	0.00408574	0.08153	0.326932	-0.125552
AC120498.10	-0.190212	-0.603865	-0.531602	3.55544	-0.103642	-1.22108	0.501666	0.638659
AC120498.3	0.103555	0.472648	0.218174	0.770892	-0.547066	0.00832679	0.440266	0.72779
AC121334.3	-0.160714	1.28826	0.724212	0.272364	-0.928238	-0.644235	0.0399119	0.241798
AC121493.1	0.240718	-0.745825	-0.297664	0.735122	0.365102	0.694804	-0.33032	-0.150414
AC121761.1	-0.219663	-0.241945	-0.320906	0.673005	-0.614816	-1.26741	1.12959	0.141543
AC122129.1	0.00355316	0.74941	0.588287	-0.147212	-0.195908	-0.346177	-0.141167	-0.0641849
AC123512.1	0.0279179	0.88257	0.897027	-5.10071	-0.187564	0.225349	0.92743	0.97459
AC123768.3	0.152483	0.135614	-0.157546	0.973839	0.224563	-1.96352	-0.831182	0.174784
AC123912.1	-1.54189	0.204575	2.66274	-0.127449	-1.44448	0.284318	0.230994	-0.347373
AC124016.1	0.409567	1.88591	1.78183	0.65153	0.0330769	-0.0697707	-0.748288	-0.135398
AC124016.2	0.105021	1.29492	1.06586	-0.186506	-0.133114	0.141347	1.23808	0.162986
AC124242.1	-0.449689	-1.31062	-0.00272682	0.0814481	0.136021	1.34997	0.0547722	-0.155914
AC124254.2	-0.465976	0.486145	0.257857	2.94254	0.234739	0.666759	-0.234066	-0.987329
AC124283.1	0.851459	1.95759	2.06822	0.200711	-0.0146289	0.613317	0.0956908	0.0880765
AC124312.5	-0.0893957	1.17853	0.526481	0.850544	0.334402	1.03819	-0.104088	0.119669
AC124798.1	0.470281	-0.142603	-0.1333	0.307203	0.00803765	0.732262	0.389386	0.00910418
AC124798.3	-0.221436	0.192472	0.137282	3.80002	0.725806	-0.248704	-1.47744	-0.148178
AC124852.1	-0.0699992	0.623945	0.398998	-1.04957	-0.147879	0.143313	0.661051	1.46514
AC124854.1	-1.83175	-0.0463513	0.619413	-0.149607	-0.243213	-3.15269	-1.79542	-0.0511131
AC124944.3	0.116134	0.955103	0.373993	-0.00380934	-0.483619	-0.78303	-0.256594	0.854189
AC124947.1	-0.456803	-1.24177	-0.352845	3.33612	0.107233	0.912232	2.3119	1.46277
AC125437.3	-0.0778069	0.862972	0.476189	1.29021	-0.911856	-0.423683	0.51505	0.42832
AC125494.1	0.16554	1.16573	0.825734	0.254907	-2.63011	-0.638464	0.931487	-0.023408
AC125613.1	-0.0982247	0.997165	0.60795	0.632705	0.190931	0.086662	0.0881188	0.416659
AC125616.1	1.64766	0.687792	0.111435	-0.302035	0.886349	0.872263	0.741061	0.169168
AC125618.1	-0.677706	-1.40136	-0.496705	-0.167487	-0.795587	-0.484984	0.587536	-0.288276
AC126118.1	0.214901	0.0808282	-0.146466	-0.011165	-0.260223	-0.323437	-0.0875292	-0.730088
AC126121.3	0.0166708	1.62302	1.2994	2.33473	0.167341	0.140019	0.143349	1.22849
AC126177.3	-0.262224	0.0848887	-0.0290904	-0.975031	-0.736438	1.13064	-0.00510707	-0.149523
AC126178.1	-0.343848	-2.22134	-1.05501	5.77026	-0.056433	-0.150672	0.107154	-0.249347
AC126283.1	3.11276	0.57339	-0.132638	-0.0563659	0.319329	0.571136	0.424888	-0.749258
AC126544.2	-0.393463	-1.63179	-1.34452	-0.657317	0.186685	-0.168048	0.389411	0.148012
AC126696.1	-0.279001	-0.28256	0.0658953	-0.336609	0.570979	-0.163123	-0.160862	0.13638
AC126696.2	-1.41253	-0.109411	0.3189	0.481321	0.607859	1.01149	0.676598	0.593936
AC126696.3	-0.292755	-0.906924	-0.202231	-0.0304347	0.214362	0.553091	0.221605	0.0527632
AC126773.3	0.396926	0.750001	-0.330343	6.64105	-0.0322226	-1.01405	0.116472	0.117318
AC126773.6	-0.0658316	0.177423	-0.0220151	0.763119	0.0343629	0.191227	1.21136	-0.0436421
AC127024.2	-1.67923	-0.754652	-0.144303	0.8975	0.2905	-0.0371931	0.456822	0.68303
AC127024.3	-0.188721	0.628473	0.438865	-0.707104	0.199308	0.164523	-0.32891	0.718917
AC127024.4	0.0395032	1.95111	1.23434	0.052434	-0.0485499	1.15813	0.751489	0.226032
AC127024.5	-0.161193	1.19359	0.372592	-0.613467	-0.0589298	-0.311407	0.701165	0.742987
AC127024.6	-0.886374	0.392329	0.607692	0.586964	-0.0984295	0.688485	0.552517	1.07766
AC127035.1	0.111677	2.24013	1.01672	0.722667	-0.454536	0.0884747	1.25098	0.987932
AC127070.2	-0.287822	1.86565	1.43271	-0.0362257	0.493825	2.70929	0.218943	0.863223
AC127164.1	-0.0410984	1.51215	0.93395	-0.219919	-0.271303	0.999594	0.870031	1.52095
AC127496.5	0.209494	-0.978722	-1.47704	0.132623	0.978121	0.310105	-1.29176	0.0892132
AC127502.2	-0.219198	-1.15626	-0.0720545	0.869666	-0.125995	0.144945	0.156715	0.00338597
AC127526.1	-0.0481158	0.234393	-0.490382	1.27398	0.515769	2.60724	-0.11148	-0.302163
AC127526.2	0.0825423	-0.634307	-3.86612	1.18901	0.991638	1.05634	0.235998	-0.0822708
AC128685.1	0.0857274	1.58035	0.211344	3.15783	-0.709399	0.419947	0.787473	1.47487
AC128687.3	-0.177516	1.57657	0.551105	-0.458956	-3.36401	-0.576882	0.50037	0.216249
AC128707.1	0.475757	3.39409	0.308839	-1.24145	0.330013	-0.541753	-0.0238051	-0.271801
AC129102.1	0.0410384	-0.198574	0.847995	-0.47963	0.105221	0.891749	0.525684	-0.992156
AC129492.4	-0.0570094	-0.458355	-0.174975	0.0566535	-0.203346	-0.201141	0.527713	-0.298376
AC129803.1	0.137368	0.770294	0.200748	0.237631	-0.251935	0.91973	1.53136	0.675175
AC130324.1	0.507634	1.89201	0.227147	0.225263	-0.154317	-0.0100008	0.204097	-0.616787
AC130324.2	-0.243748	2.00463	0.659536	0.233677	-2.11647	0.767824	3.70669	0.417728
AC130415.1	-0.241194	-0.130073	-0.716924	-0.0377822	-0.547133	0.00741107	0.186978	-4.16167
AC130466.1	-0.0317031	0.435561	0.286536	2.7779	1.52785	0.103547	-0.623282	0.211949
AC130650.1	-0.0381198	1.74852	1.14406	-0.26782	-0.171454	0.0954715	0.118848	1.31626
AC130650.2	-0.442333	-0.529131	-0.0032893	-0.701072	-0.114761	-0.0275415	-0.308289	-0.129467
AC131009.1	-0.286492	0.106705	-0.190264	0.0901426	-0.0102743	0.590118	0.0881528	-1.19306
AC131568.1	0.00314201	1.40797	1.23964	0.0814757	0.245643	0.107058	0.0263588	1.83812
AC131571.1	0.0653458	1.44495	1.01055	0.0732649	-2.24976	0.417568	1.03592	1.05252
AC131934.1	0.159948	2.3683	1.50029	0.198321	1.12767	0.612388	0.827103	0.603594
AC131944.1	1.48728	-0.307855	-0.487153	-0.0500043	0.0356	-0.0572882	0.156105	0.105886
AC132192.1	0.0619223	1.25571	1.45553	-1.50309	0.103382	0.481237	-0.605644	-0.166222
AC132192.2	-0.0163697	0.270112	0.973872	0.252986	0.422016	0.109181	-1.34207	-0.18345
AC132219.1	0.262833	0.968105	0.309065	0.0243703	-1.0105	0.0871093	0.250424	0.100766
[truncated: 16,004 more rows]

## Sheet: Cone age sign  -log10P
	X20	X30	X40	X50	X60	X70	X80	X90
A1BG	-1.26582	0.257794	2.41232	NA	-0.352084	-0.223581	-0.42085	-0.186805
A1BG.AS1	-0.0352877	-0.22996	0.208699	NA	-0.387629	0.229034	-0.127516	-0.208502
A1CF	0.0150532	0.983038	0.320435	NA	-0.206881	-1.4683	-1.61269	0.200638
A2M	-0.00948589	1.22997	0.95629	NA	2.85037	0.41909	1.24185	11.2953
A2M.AS1	0.102152	-0.339612	-1.62922	NA	1.75725	0.775571	0.349233	-0.813638
A2ML1.AS1	0.312334	1.39226	0.99814	NA	-0.130784	-0.209737	-0.719492	0.215818
AAAS	-0.0278927	-0.385936	-0.105375	NA	-0.28374	0.900763	0.846895	0.445506
AACS	-0.646403	-0.672377	-0.116958	NA	-0.00578556	-0.726661	-0.291714	0.0804898
AADAT	0.0300094	0.16617	-0.261818	NA	-2.2255	0.0966928	-0.19203	0.0673384
AAGAB	-0.0947306	0.621023	0.855005	NA	-1.66066	1.00575	4.47996	0.427903
AAK1	0.21452	-0.293712	-0.315177	NA	0.961667	0.110163	0.16712	0.414306
AAMDC	0.331035	1.34794	2.83675	NA	0.340833	-1.02735	-0.0787537	1.90186
AAMP	0.715177	0.193136	-0.328737	NA	-0.77053	-0.0222843	-0.476887	-0.208676
AANAT	0.362181	2.43863	0.512567	NA	-0.369404	0.264736	0.263854	0.38354
AAR2	-0.630889	-0.777274	0.0152364	NA	-0.846113	0.29792	0.0811729	0.722242
AARS	0.583914	2.69519	0.765775	NA	1.00188	2.15411	2.85495	-1.36115
AARS2	-0.155608	-1.01971	-1.59553	NA	-0.351859	0.518917	0.176186	-1.67327
AARSD1	-0.121612	1.14479	1.55074	NA	-1.16079	0.116004	1.16141	0.343904
AASDH	-0.400958	2.27518	1.19246	NA	-1.73128	0.978055	0.349819	-1.70759
AASDHPPT	0.180661	-0.0226928	-0.197393	NA	-0.700723	-0.117019	-1.60943	-1.39656
AASS	-0.308443	0.658502	1.17181	NA	0.0215776	-0.0927277	0.988556	-0.0308763
AATF	0.36874	0.982084	0.550285	NA	-4.82553	2.66044	2.08883	0.00410194
AATK	0.249666	2.22352	0.924407	NA	-0.0320501	-0.0302822	0.0912297	0.18087
ABALON	0.0687955	0.434237	0.140878	NA	-0.0343441	0.0148224	-0.0455014	1.34178
ABAT	-0.127785	0.0326494	0.676109	NA	0.531852	0.0866535	-0.271044	0.525485
ABCA1	0.117424	-0.374514	-0.0811917	NA	-1.31567	-0.0221135	-0.0699269	1.34029
ABCA10	-0.0253116	-0.0386522	0.123076	NA	-0.307246	0.67796	3.43117	0.18561
ABCA13	0.0224142	-0.49247	-0.815435	NA	0.798752	0.946958	0.0590849	2.63108
ABCA2	1.30702	0.180653	-0.298413	NA	-0.573728	0.480879	0.294241	-0.314273
ABCA3	-0.0248966	0.0780416	-0.0832951	NA	-0.503099	1.4982	2.39857	0.252284
ABCA4	-0.0581621	-0.745086	-1.04076	NA	0.343213	1.02494	1.94112	-0.0773549
ABCA5	0.342763	-1.0452	-0.646175	NA	0.63435	0.0544922	0.552748	-0.128175
ABCA6	-0.16207	0.424502	0.687983	NA	-0.00852263	1.0391	3.50213	0.0522885
ABCA7	0.143686	-0.257818	-0.250208	NA	0.0808582	2.60008	6.00375	0.0180157
ABCA9	-0.326629	-0.52869	0.1376	NA	-0.553269	1.22571	4.05089	0.152336
ABCA9.AS1	-0.0929998	0.993367	1.30812	NA	-1.07097	0.383229	1.20808	0.116326
ABCB1	0.321848	0.857652	0.229571	NA	0.070411	-0.0930022	0.281585	1.28036
ABCB10	-0.00950952	0.0920237	0.194992	NA	0.257625	-0.281658	-0.954287	-0.0822687
ABCB11	0.525977	0.838219	0.237528	NA	-0.262645	-1.42097	-0.768233	-0.6051
ABCB4	-0.047682	2.10132	1.02462	NA	-0.297229	-0.706282	-0.0793765	0.909245
ABCB6	0.0596787	0.00324363	-0.106625	NA	0.0965873	0.49197	0.142413	-0.466442
ABCB7	0.399962	2.13527	0.648673	NA	-0.944363	0.241196	0.0612178	0.1879
ABCB8	0.270566	2.69908	3.35736	NA	-2.02281	0.477803	0.22432	0.808176
ABCB9	0.145119	-0.224535	0.167339	NA	0.455248	0.140429	0.818647	-0.101362
ABCC1	0.395474	-0.463834	-0.912348	NA	2.06968	0.431111	1.86044	0.135839
ABCC10	0.444359	0.586599	0.291486	NA	-0.975378	0.940713	0.0934373	0.202599
ABCC11	-0.0292697	1.02133	0.506275	NA	-1.10832	-0.380377	0.502416	0.332636
ABCC2	-0.105519	0.366035	0.263769	NA	-0.631054	-0.846938	-1.31596	-0.14183
ABCC4	-0.041111	0.922556	1.04048	NA	-0.0383347	0.305408	0.714643	0.923362
ABCC5	1.69252	0.259074	0.244857	NA	-2.28932	2.11876	6.00194	1.77004
ABCC5.AS1	0.193147	2.78318	1.65434	NA	-1.45589	-0.290455	0.363709	0.281581
ABCC6	-0.0188491	0.0816872	0.470877	NA	-0.210118	-0.803295	-0.189892	0.726465
ABCD1	-0.220078	-0.480637	-0.431677	NA	-0.173494	-0.693897	-0.0485964	0.142282
ABCD2	-0.120826	-2.2346	-0.335314	NA	0.0652245	-1.85927	-0.454422	0.159091
ABCD3	-0.157803	-0.0496557	0.0588523	NA	-0.108187	0.152475	-0.0944405	-0.174692
ABCD4	0.0155677	-0.134218	-0.174365	NA	1.72891	0.0227838	-0.211927	-1.21557
ABCE1	-0.181562	0.0689115	-0.0015595	NA	-1.0851	-0.0740387	-0.274115	-1.97806
ABCF1	0.422431	0.324809	-0.294431	NA	-0.888239	0.789669	1.99635	-1.48134
ABCF2	0.13598	-0.685848	-0.893817	NA	-0.329384	0.01802	-0.376555	-0.179963
ABCF3	0.208909	0.158546	-0.0407943	NA	-1.17485	-0.495897	0.140706	0.159404
ABCG1	-0.106098	-0.383596	0.203567	NA	-0.949971	-0.38064	-0.481678	1.14385
ABCG4	-0.0322518	0.888531	0.0260332	NA	-0.498217	0.986392	0.526666	-0.0962111
ABCG5	-0.24318	0.467893	1.03946	NA	-0.755245	-0.465881	-0.206039	0.765167
ABHD1	0.319608	1.16187	1.78323	NA	-0.936649	0.974665	0.385571	0.554357
ABHD10	2.28971	1.0778	0.464539	NA	0.312029	-0.547502	-1.29322	-2.62538
ABHD11	1.07441	0.722071	0.0815023	NA	-1.84263	0.248903	0.31322	-0.180959
ABHD12	-0.0284965	0.33207	0.109042	NA	0.620342	0.0956296	-0.497379	-0.336749
ABHD12B	0.0118436	0.258667	-0.590044	NA	0.0127719	0.0186414	-0.208949	1.38047
ABHD13	0.00735989	0.525001	0.635111	NA	1.90207	-1.24743	-3.91624	-1.49239
ABHD14A	-0.0645266	1.05744	0.869149	NA	-0.392009	-0.358913	-0.465592	0.651093
ABHD14B	-0.207846	-0.693541	-0.121034	NA	9.44577	-0.219999	-0.0659565	0.547574
ABHD15	0.539956	-1.62112	-2.0084	NA	0.486764	-0.641004	-0.494765	-1.20354
ABHD15.AS1	0.259084	2.05727	0.915747	NA	0.112224	-0.624088	0.000945178	2.81593
ABHD16A	1.19919	0.30701	-0.338434	NA	-1.23143	0.471393	0.00743605	0.696145
ABHD17A	0.0761857	0.611798	0.305527	NA	0.508452	0.843442	-0.342985	-0.675642
ABHD17B	-0.0757472	0.466774	0.290915	NA	-0.0621152	-1.06323	-3.78497	-0.671987
ABHD17C	0.0499232	0.273954	0.333691	NA	-1.79142	-0.726586	-0.387864	1.13201
ABHD18	-0.101202	0.621678	0.731038	NA	-1.83498	0.767631	2.69515	-0.603084
ABHD2	-0.159957	0.174253	0.344671	NA	1.49001	0.357385	0.766181	-0.0893576
ABHD3	0.474198	-0.429934	-0.854191	NA	0.0600666	0.166366	-1.34145	0.0735017
ABHD4	0.132784	-1.01176	-1.79895	NA	-1.04254	-1.12833	-0.352469	-0.175362
ABHD5	0.447627	0.478381	0.665133	NA	-0.705004	-0.201725	0.3106	0.389257
ABHD6	-0.153899	-0.176213	0.0250433	NA	-0.0910013	-0.392292	0.223708	0.0758586
ABHD8	0.3457	1.80117	2.07289	NA	0.346167	0.0963049	0.758617	-0.58203
ABI1	0.0629195	0.581813	0.634049	NA	-1.14894	0.193099	0.126771	0.130008
ABI2	-0.0816471	0.795667	0.548839	NA	-0.184504	-0.903096	-0.0185015	0.334321
ABI3	0.194499	0.297371	0.132971	NA	-0.386924	-0.158435	-0.108061	-0.387619
ABI3BP	-0.0922482	2.86044	0.748866	NA	0.487454	-0.348529	0.798728	-0.264184
ABITRAM	0.0268857	0.941069	0.60214	NA	1.36417	0.194635	-0.151548	-1.88876
ABL1	-0.353916	-0.270821	0.299241	NA	-0.251588	0.397258	0.690192	-0.0454612
ABL2	0.0446201	2.14667	0.351243	NA	-10.7929	-2.64066	-1.90784	-0.131952
ABLIM1	0.143403	0.0555489	-0.019183	NA	1.05413	1.62099	1.28682	0.149312
ABLIM2	0.150291	-0.302445	-1.01668	NA	-0.320582	0.725552	0.166074	1.17809
ABLIM3	-0.519976	0.280357	-0.00258232	NA	0.0764272	0.586333	0.64616	0.468145
ABR	-0.0748103	0.762577	0.460461	NA	0.864698	0.673655	0.273136	0.444962
ABRAXAS1	-0.212562	0.643336	0.84468	NA	1.15145	-0.612247	-2.74443	-0.0655305
ABRAXAS2	0.0756118	0.940961	1.0938	NA	-0.468315	-2.17551	-0.256659	0.559442
ABT1	0.466405	1.25698	0.69195	NA	-0.234725	0.0641631	-1.09801	-0.034814
ABTB1	1.23199	-0.452181	-1.09418	NA	0.877682	0.369318	-0.514596	-0.093145
ABTB2	0.123127	-0.248487	0.0853421	NA	0.000359811	-0.118116	-0.423674	0.485874
AC000068.1	-0.214524	0.533472	0.968404	NA	-0.177418	-2.25881	-1.60819	-0.572231
AC000068.2	0.00548327	-0.250908	0.0239425	NA	1.32012	0.263114	-0.0102507	0.0481885
AC000068.3	0.39386	0.0431578	0.435228	NA	0.218463	0.484483	0.209534	-2.24302
AC000085.1	0.0452147	-0.0134337	0.199598	NA	0.327904	-0.496469	-0.375098	0.749911
AC000124.1	-0.538582	1.53759	1.39106	NA	-0.121081	0.649582	-0.609225	-0.630888
AC002064.1	-0.26758	0.495353	0.88875	NA	0.349159	-0.791744	-0.374748	0.470456
AC002070.1	0.243561	0.863564	0.47134	NA	-0.509913	-0.211537	-0.155838	1.5681
AC002072.1	-1.43976	-0.890897	-0.309286	NA	-0.850152	-0.48601	1.7799	0.489911
AC002094.4	-0.237573	0.43613	0.132258	NA	0.300776	0.365681	0.861068	0.663163
AC002116.2	0.990309	0.419755	-0.317804	NA	0.680912	-0.573252	0.00946777	-0.289276
AC002310.1	-0.337565	0.0287544	0.225262	NA	-0.386777	-0.119231	-0.743678	-0.529487
AC002310.2	-0.0144672	1.29846	1.87647	NA	-1.30695	-0.432761	0.102499	0.762937
AC002377.1	-0.375857	-0.573217	-0.249241	NA	0.029943	0.365599	-0.0312365	1.02227
AC002429.2	0.153489	1.28712	1.04315	NA	-0.554769	0.510825	0.299875	2.54921
AC002460.2	0.00452183	-1.11862	-2.1974	NA	1.23644	-0.630473	0.404406	-0.504686
AC002463.1	0.0785674	1.16991	0.692164	NA	-1.27389	-0.0213254	0.480178	0.47217
AC002467.1	0.642775	0.187726	0.637023	NA	-0.54677	0.134552	-0.278632	-0.233119
AC002470.1	-0.0334104	1.80521	1.63818	NA	-0.223944	0.273291	-0.347883	-3.01886
AC002546.1	0.014203	0.537182	1.57355	NA	-0.0770985	-0.232623	0.0584981	0.410159
AC002550.1	-0.297924	-0.0163268	0.645453	NA	0.111743	-0.814967	-0.183557	-0.105841
AC002553.1	0.30008	0.724854	0.0161186	NA	0.0454681	-1.84156	-1.12698	-0.354662
AC002553.2	-0.0842618	0.362854	0.538962	NA	-0.566008	-0.658555	-0.249235	0.283165
AC002558.2	0.516417	0.79108	0.45926	NA	-0.22427	-0.857502	-0.794418	0.388814
AC002558.3	-0.0111633	0.990613	0.766361	NA	-0.0220473	0.0235254	0.57851	-0.039015
AC003005.2	0.0218294	0.0974411	1.42803	NA	-1.69452	0.842326	-0.318241	0.415882
AC003035.1	0.0475777	0.45586	0.940669	NA	1.59108	-0.297779	0.249582	0.316407
AC003035.2	-0.560711	0.810301	0.756607	NA	0.0664145	-0.207863	0.433226	0.806594
AC003044.1	-0.760907	-0.241882	0.0725036	NA	0.165395	0.748934	0.557733	0.339237
AC003092.1	0.427197	3.02341	0.466193	NA	1.70424	-0.0740996	0.342969	-0.0821857
AC003092.2	0.248856	0.996621	-0.0160185	NA	0.282413	0.245862	1.04443	0.244839
AC003093.1	-0.899303	0.281066	1.62747	NA	0.789048	-0.878707	-0.772175	-0.984024
AC003102.1	-0.146595	0.508306	0.300544	NA	-0.144898	-0.912952	-0.821494	-0.0094384
AC003666.1	-0.591656	-2.4316	-0.793288	NA	-0.254636	-0.689356	-0.179755	0.0659236
AC003681.1	0.032779	1.00714	0.618214	NA	-0.356944	0.0106314	0.86257	1.72755
AC003682.1	-0.172784	-0.138302	0.253008	NA	-0.02614	-0.363163	-0.86833	-0.880243
AC003965.1	0.701142	0.216418	0.503912	NA	0.967475	0.230313	-0.544794	0.0316362
AC003991.1	0.624786	2.09821	2.62324	NA	-2.13158	-0.613843	-0.760441	0.312309
AC004034.1	-0.251438	0.264437	1.42479	NA	-0.279664	-0.259093	1.8686	1.88327
AC004039.1	-0.0137227	0.962385	0.820888	NA	-2.84144	-0.436412	0.0944505	0.184465
AC004053.1	0.147035	1.0078	1.08739	NA	-1.93873	-1.17743	-0.559245	0.405364
AC004054.1	-0.0295536	1.09922	0.818692	NA	-0.392424	-0.657598	-0.215687	0.789109
AC004069.1	0.15952	-0.966128	-1.01105	NA	1.42483	0.52803	0.39328	-0.0366361
AC004076.2	0.0229551	2.4855	0.704849	NA	1.88471	-0.142775	0.0405476	1.72908
AC004083.1	-0.202932	0.184544	0.00290437	NA	-0.850408	-0.677477	0.043618	0.0360747
AC004112.1	-0.473914	0.97892	1.63032	NA	0.295689	-0.196475	0.903692	1.68578
AC004147.2	-0.154748	-0.143662	-0.0666304	NA	-0.0987047	-0.419799	-0.442198	0.418646
AC004147.3	0.204829	0.741302	0.298622	NA	-0.0941709	1.09026	0.470997	1.24344
AC004147.5	-0.0921492	0.381989	0.237241	NA	-0.458931	-0.0171571	0.202267	0.347707
AC004148.1	0.292661	0.747223	0.389834	NA	-0.68477	-0.419681	-1.92274	-0.337446
AC004158.1	0.267094	0.859251	0.390916	NA	0.996571	-0.203501	0.107414	0.729753
AC004160.1	0.0108819	1.32679	0.745444	NA	-0.448902	0.430831	0.813429	3.82018
AC004217.1	-0.0454369	0.0726713	0.600163	NA	-0.109615	-0.332649	-0.3987	1.4754
AC004233.1	0.155893	0.0261482	0.289754	NA	1.13473	0.152406	-0.603022	-0.114701
AC004233.2	-0.273833	-2.90592	-2.93317	NA	-0.201286	1.73579	0.278186	-0.462635
AC004233.3	-1.0508	0.317987	1.10078	NA	0.636211	0.508001	-0.245609	-0.256459
AC004241.1	-0.458635	-0.114054	0.488719	NA	-0.229044	1.49122	0.768178	0.113591
AC004253.1	0.122494	1.16464	0.835957	NA	-0.0291593	0.949967	1.00835	0.853376
AC004263.2	-0.127547	0.208043	0.410968	NA	0.241317	-0.134684	0.546087	0.827431
AC004448.2	-0.230448	-0.365181	-0.501838	NA	2.11927	-0.402901	-0.460516	0.521245
AC004471.1	0.759885	0.910905	0.295422	NA	1.61289	0.897067	0.133485	0.312703
AC004477.1	-0.46985	-0.138862	-0.152781	NA	2.99382	-0.105859	-2.11593	0.0239348
AC004490.1	-0.172957	-0.23327	-0.281722	NA	2.96426	0.870237	0.140635	-2.41836
AC004494.1	-0.806432	-1.0342	-0.150783	NA	0.0992455	0.332185	0.128305	0.804147
AC004540.1	-2.12045	-0.0502034	0.77927	NA	0.00976628	0.231404	-0.148876	1.21537
AC004540.2	-0.203853	0.321425	0.764675	NA	-0.302448	-0.118236	-0.946	2.14149
AC004584.1	0.0829069	0.977793	0.555725	NA	-0.685554	-1.31354	-0.0405432	0.219603
AC004596.1	-0.0287325	-0.0768419	-0.1033	NA	-1.08725	-0.305959	-0.628722	0.0837127
AC004672.1	-0.317988	0.0577899	0.137345	NA	-0.938111	1.07045	1.00398	0.335439
AC004702.1	-0.217108	-0.0152834	0.260701	NA	-0.379002	1.55918	0.456438	-0.973754
AC004704.1	-0.0986049	0.97754	0.902652	NA	-0.447621	0.0640204	-0.0785963	-2.53905
AC004765.1	0.0891586	0.50626	1.5657	NA	-2.2948	0.247271	1.35375	0.845558
AC004771.4	-0.221109	-0.227106	-0.218912	NA	-1.2454	0.0303001	-0.154855	-0.192444
AC004784.1	-0.269272	-1.72077	-1.57814	NA	1.77669	-1.29246	-0.898172	-0.522246
AC004797.1	0.0896851	2.37479	1.79751	NA	0.584777	0.203696	-0.0417266	0.167699
AC004803.1	0.654068	-0.352867	-0.272874	NA	0.956598	0.376467	-0.506253	0.0586272
AC004812.2	-0.216632	0.221878	0.591387	NA	-0.00454749	-1.2833	-1.73662	-0.887176
AC004816.1	0.0832883	-0.152818	-0.779746	NA	-0.305075	0.0447316	-0.0696028	-0.307885
AC004825.3	0.0616321	0.921454	0.708115	NA	-0.874022	0.304763	0.311595	0.256397
AC004828.1	0.0099919	0.615184	0.262656	NA	0.176405	-0.0494705	0.125869	0.253768
AC004828.2	-1.50362	-0.376131	0.177001	NA	0.627416	0.804427	0.896632	-0.148006
AC004830.2	0.012188	0.388593	0.00644097	NA	10.8077	0.556001	-0.0297248	-0.284605
AC004834.1	-0.745494	-0.0169935	0.345454	NA	4.70686	-0.396298	0.185379	0.583534
AC004837.4	-0.571949	0.296656	0.986231	NA	-0.246107	-0.202689	-0.872677	0.127512
AC004839.2	-0.45811	-0.355891	0.152633	NA	-0.00704526	-0.459689	-0.445235	0.0323234
AC004846.2	0.132558	0.446169	0.390538	NA	0.23857	0.0369913	0.452472	0.0797452
AC004865.2	0.698372	0.307809	-0.0355118	NA	1.07923	0.241502	-0.323632	-0.0967592
AC004884.2	0.0766986	1.90014	0.77443	NA	0.330648	-0.327918	-0.88722	0.892611
AC004889.1	0.129943	0.361	-0.406043	NA	4.82426	1.24451	0.186373	0.165101
AC004908.2	0.43141	-0.0231969	0.187042	NA	0.63101	0.557323	-0.649711	-0.00107595
AC004918.1	-0.00460514	0.0434623	0.285468	NA	1.19608	0.593241	0.289545	-0.476744
AC004918.4	-0.895981	-0.291149	0.756778	NA	0.178794	0.0450892	-0.981402	-0.567292
AC004938.2	-0.319393	-0.699196	-0.470977	NA	0.208708	0.0102709	-0.313402	0.0525675
AC004943.2	-0.508791	0.101019	0.142235	NA	0.0558819	0.70872	0.531206	-3.15359
AC004949.1	0.276448	0.315674	0.589789	NA	0.391837	0.569105	0.410931	-0.682469
AC004951.1	-0.562861	-0.979204	-0.178156	NA	-0.638676	1.57861	2.04587	0.957213
AC004974.1	-0.192779	-0.386019	-0.545505	NA	0.468315	0.0271479	-0.423037	0.670317
AC004982.1	0.510891	-0.123161	-0.93092	NA	-0.127031	-0.282819	0.257195	-0.335082
AC004982.2	0.252129	1.05683	1.37924	NA	0.340382	-1.37609	-0.507091	0.387782
AC004988.1	-0.0366597	1.38644	0.951356	NA	-0.23535	1.94514	0.680491	1.10716
AC005009.2	-0.0261389	0.473552	0.26384	NA	-2.11725	0.447526	0.345453	0.0934014
AC005014.2	-0.0310372	0.0542524	0.0283721	NA	-0.78227	0.732608	0.218372	-0.182372
AC005014.4	0.384605	0.947578	1.09022	NA	1.42782	-0.235155	0.262822	0.481096
AC005034.4	-0.297903	-0.0664644	0.142377	NA	-1.38211	-0.231954	0.00191816	0.141869
AC005034.6	0.0708267	0.780398	0.185776	NA	-0.0627815	0.695061	-0.144114	-0.135836
AC005037.1	-0.0528286	1.4283	1.16207	NA	-0.734036	-0.683351	0.198589	1.32157
AC005041.4	-0.279808	0.916769	1.61246	NA	-0.101185	0.1356	-0.270758	-0.188681
AC005041.5	0.307781	1.24626	1.15578	NA	-0.134452	-0.706032	-1.13172	0.0271983
AC005046.1	-1.14891	0.113127	1.56846	NA	0.242219	0.198364	0.0475529	-0.839145
AC005052.2	-0.180225	0.533937	0.731018	NA	0.28513	-0.0982871	0.411354	-0.706256
AC005070.3	-0.0217733	0.795972	0.73031	NA	0.0491157	-0.492159	-0.0132573	0.403885
AC005072.1	-0.354639	0.281397	0.398252	NA	0.764016	0.25881	-0.0302116	0.927384
AC005076.1	0.871249	1.68911	1.88642	NA	1.35736	1.45929	0.53929	0.0870417
AC005081.1	0.136652	1.25995	0.486024	NA	0.640394	0.325003	0.267722	0.555141
AC005091.1	-0.0663804	0.397526	0.270281	NA	0.640557	0.163774	0.0922934	0.409428
AC005096.1	0.331593	0.726765	0.714186	NA	-0.384319	0.496068	0.535929	1.09938
AC005104.3	-0.0107276	0.483626	0.703936	NA	-1.90412	0.00931875	0.492297	0.254152
AC005153.1	-0.12961	0.26956	0.442878	NA	0.971574	-0.335438	0.0559691	0.546679
AC005154.4	0.424124	1.50549	1.30219	NA	0.629507	-0.0842774	0.412523	0.71603
AC005224.2	-0.0537952	-0.244402	-0.131612	NA	-1.64463	-0.177779	-0.134933	0.254861
AC005224.3	-0.15808	0.000972545	0.0984244	NA	0.274525	0.014495	-0.336998	-1.40072
AC005225.2	-0.14419	2.04351	1.4189	NA	0.119582	-1.90295	-2.7618	0.142275
AC005225.3	-0.464967	-0.0885116	0.023131	NA	0.26529	-1.19541	-0.463191	-0.0158446
AC005229.4	-0.278948	-0.419459	-0.0817021	NA	0.0568397	-0.109343	-0.598728	-1.48456
AC005229.5	-0.0359133	0.759513	0.648171	NA	0.310965	0.0464696	0.749126	0.903056
AC005237.1	0.372657	-0.123554	-0.672573	NA	0.755901	-0.560614	0.0648269	0.517375
AC005253.1	0.307741	0.680629	0.527626	NA	4.598	0.537924	0.670792	0.0233431
AC005261.1	-0.527806	-0.753907	-0.262102	NA	0.547497	-1.10883	-1.10343	-0.565578
AC005261.2	0.292535	-0.52332	-0.682984	NA	-0.886482	0.13097	-0.141241	-0.233285
AC005280.1	-0.119063	0.824617	1.20883	NA	-1.16713	-0.0704942	-1.25994	-0.405801
AC005280.2	-0.104202	0.706842	0.215759	NA	-0.945722	0.0476652	-1.25545	-0.477345
AC005288.1	0.179433	0.876449	-0.122846	NA	-0.0312873	0.0887279	0.171702	-1.36268
AC005291.2	-0.136136	1.75008	2.19554	NA	1.01813	1.25976	1.02994	0.138475
AC005306.1	0.259417	-1.22571	-2.42272	NA	-0.0169229	-0.283935	-0.38581	0.0839384
AC005329.1	-0.0242842	-3.32154	-2.66314	NA	-0.891361	0.499822	-0.00979992	0.0595145
AC005332.2	-0.235733	-0.695315	-1.41651	NA	1.6506	-0.415232	-0.63678	-1.1159
AC005332.3	0.234196	0.230599	0.11273	NA	-0.89063	-0.10874	-0.186246	-0.556852
AC005332.4	-3.47836	-0.262924	0.013331	NA	0.453552	-0.323001	-1.69812	-0.00725908
AC005332.5	-0.281278	-0.505586	-0.618923	NA	-0.688909	0.409724	1.17747	-0.880247
AC005332.6	-0.145016	-1.60014	-0.527268	NA	0.897964	-0.185516	-0.900854	-0.0726394
AC005332.7	-0.677452	-0.00687258	0.861507	NA	-0.552501	-0.534534	0.222852	0.0941167
AC005342.2	-1.59491	-0.548235	0.0593342	NA	-0.85682	0.303916	0.384523	0.479065
AC005343.1	0.269206	0.484046	0.607468	NA	-0.472131	-0.447525	-0.485123	-0.167752
AC005343.4	-0.361709	1.47187	0.769256	NA	-0.372964	-0.756055	-0.474109	0.20202
AC005355.1	-0.922618	-0.228656	0.91313	NA	-0.265452	0.396804	2.35963	0.738472
AC005363.2	-0.197043	0.457537	0.0366669	NA	0.528668	-0.281674	-1.17854	0.0124143
AC005387.2	-0.429558	-0.0574727	0.0416509	NA	-0.14948	-0.0628215	0.525972	0.413835
AC005393.1	0.194439	0.177999	0.20957	NA	-0.448831	0.678054	-0.148997	0.345843
AC005400.1	0.280487	0.287888	0.102014	NA	0.566958	1.20741	0.922557	3.95219
AC005410.2	-0.516736	-3.17263	-0.796811	NA	0.296951	1.79901	1.0476	0.54807
AC005476.2	-0.732614	0.312686	0.0728854	NA	0.068254	0.175261	1.43801	0.140708
AC005480.1	0.595682	1.22625	2.35088	NA	0.555159	0.0739755	0.209921	1.81293
AC005498.3	-0.514982	-0.0292833	-0.0965165	NA	0.490772	0.118907	-0.297077	-0.423499
AC005520.2	-1.81309	0.275486	5.45966	NA	0.653704	-1.87695	-2.29036	-0.876795
AC005520.5	-0.0663822	0.442739	0.906188	NA	0.750275	-0.106966	-0.0699745	0.0258461
AC005522.1	-0.087101	0.507384	2.09018	NA	0.199995	0.759924	1.6953	0.0572489
AC005523.1	-0.461623	-0.117356	-0.119432	NA	0.0299186	0.325167	-0.180677	-0.112961
AC005523.2	0.0318394	1.99232	1.4939	NA	0.102312	-0.320705	-0.641248	-0.00503033
AC005532.1	-0.208438	-0.640775	-0.0728952	NA	0.0342832	-0.738562	-1.1748	0.281497
AC005534.1	0.424164	0.545349	-0.12835	NA	0.703647	-1.73171	-1.49886	0.10138
AC005537.1	-1.22097	0.157308	0.704737	NA	1.30184	0.288078	0.260841	0.204303
AC005540.1	-0.178271	1.71575	1.28963	NA	-2.37764	-1.74304	-1.26459	0.037626
AC005550.2	-0.0459184	1.96569	0.240399	NA	-0.170741	0.355384	-0.130445	-1.66121
AC005562.1	0.0248279	1.33276	0.165455	NA	0.892936	0.626362	0.737584	-0.651532
AC005592.1	-0.131207	1.43071	1.60359	NA	0.0673023	0.104221	-0.395141	-0.157117
AC005592.2	-0.0749847	1.27585	3.14819	NA	-1.15981	-0.633043	0.175182	1.71794
AC005597.1	-0.244127	0.134074	0.0140808	NA	0.231885	0.0112878	-1.08097	0.201626
AC005599.1	0.243281	0.366671	0.348562	NA	0.623722	0.0575748	0.314401	2.45934
AC005609.5	0.419041	0.31208	1.69262	NA	1.39628	0.381868	-1.0039	0.548051
AC005618.4	-1.36677	-0.27836	1.57057	NA	0.082801	-0.0747492	-0.309299	0.281843
AC005632.3	0.154628	0.108291	0.383023	NA	-0.269575	0.0708623	0.457676	0.135351
AC005670.1	0.157942	-0.365347	-1.56729	NA	0.533027	0.509057	-0.195137	0.0995869
AC005670.3	0.040098	-1.10576	-1.71206	NA	0.501224	-0.108251	-0.869392	0.842995
AC005674.2	-0.0158593	-0.0112869	0.0306924	NA	1.27337	0.0353211	-0.30349	-1.40648
AC005695.2	0.0223071	1.42817	0.963511	NA	-0.541011	0.0734178	0.50443	3.61522
AC005696.1	-0.144594	-0.059458	0.520208	NA	-0.111658	0.366674	-0.477445	-0.379804
AC005696.4	0.622959	-0.363735	-0.519835	NA	0.451882	-1.41352	-0.0304068	-0.134881
AC005697.2	-0.318295	0.635613	0.485408	NA	0.695727	-0.298071	0.140335	1.05263
AC005699.1	-0.894286	0.249657	3.44548	NA	1.26861	-0.958791	-1.03025	0.0956078
AC005703.4	-0.799806	-0.251933	0.0377571	NA	-0.570866	-0.233925	-0.0921858	0.820012
AC005726.1	0.290402	0.17759	0.68116	NA	2.81745	-0.305801	-0.711885	0.643102
AC005726.3	-0.493354	0.00700597	0.108792	NA	0.205806	1.02473	0.160957	-0.514183
AC005726.5	0.0503975	2.27654	1.33626	NA	0.31281	0.276855	0.203422	1.02377
AC005730.2	0.144732	0.393264	-0.114777	NA	0.111916	-0.63871	-1.4545	-0.0818858
AC005740.3	-0.299165	0.561266	0.81106	NA	-1.62784	-0.54131	0.0621216	0.101092
AC005746.2	0.364297	0.723237	0.901314	NA	-1.07218	0.584612	1.85902	0.667135
AC005757.1	-0.966701	-0.238702	-0.0783938	NA	0.463927	-0.723319	-0.143762	0.511876
AC005759.1	-0.283334	0.0390254	0.512029	NA	2.3933	-0.153878	-1.05585	-1.37987
AC005772.1	-0.367315	0.482626	-0.446428	NA	-0.659802	0.0455593	3.36673	0.0855198
AC005775.1	-0.409277	-0.777091	-0.49646	NA	0.0834328	0.278562	-0.078539	0.0734056
AC005786.3	0.202547	-1.33235	-1.81406	NA	2.20952	0.282395	0.491093	0.735426
AC005828.1	-0.256232	0.518627	0.103628	NA	-0.284071	-0.0430781	0.211058	0.578553
AC005837.1	-0.0191672	-0.696253	-0.251418	NA	-0.946366	0.890522	-0.0671036	-5.9961
AC005838.2	0.237749	1.08543	0.570867	NA	-0.987583	0.931907	1.97458	1.82743
AC005856.1	0.239272	1.19151	0.640597	NA	-1.02542	-0.139261	0.889651	0.893793
AC005863.1	-0.636344	0.374808	0.227784	NA	2.11325	-2.29316	-3.74187	-1.95307
AC005865.2	-0.211506	-0.150311	-0.4279	NA	0.728205	0.298029	0.290542	0.908985
AC005884.1	0.518034	1.16512	0.682507	NA	-0.0160079	0.54541	1.05139	2.20678
AC005899.1	-0.664337	-0.120183	0.191871	NA	2.10576	-1.151	0.022147	-0.228106
AC005899.5	-1.6129	-0.0769491	0.0178585	NA	1.55227	-0.0920251	0.610462	0.322638
AC005899.6	0.0209926	1.03014	0.891019	NA	2.35461	-0.145626	0.265915	0.232771
AC005899.7	-0.430806	0.404832	0.598736	NA	1.40252	-0.643633	0.0880848	0.475824
AC005899.8	-0.170622	0.815997	0.944515	NA	2.12133	-1.65585	0.217785	0.0660376
AC005908.3	0.185542	-0.932477	-1.42561	NA	0.229726	0.313885	-0.310445	0.155968
AC005920.1	-0.661877	-0.0459312	0.592199	NA	-0.226494	0.869111	2.01718	0.311519
AC005920.2	0.120629	0.954843	0.664999	NA	-0.708889	0.632678	1.17863	0.746704
AC005921.2	0.241172	2.79428	2.74923	NA	-0.800941	0.0216747	-0.0697197	-0.293249
AC006001.2	-0.228294	-0.0139094	-0.318032	NA	1.10816	2.05254	2.41107	0.324478
AC006040.1	0.0616645	0.0636443	0.199816	NA	2.24506	3.83598	0.515412	-0.217412
AC006041.2	0.0390756	1.33133	1.23178	NA	-0.0905614	-0.354184	-1.08864	0.176202
AC006042.2	0.0560351	1.41506	1.1415	NA	0.0666024	0.111307	0.0465801	0.164885
AC006059.1	0.0253257	1.16196	0.775874	NA	-0.0367972	-0.51713	-0.189473	0.31635
AC006059.4	-0.0253191	0.0400058	0.416588	NA	-1.73225	-0.215992	-0.382038	0.903427
AC006064.2	0.0429178	1.09269	0.705065	NA	0.845811	1.20194	2.27509	0.513382
AC006115.2	-1.08264	0.103416	0.839763	NA	0.365671	-0.0160663	-1.03446	0.227875
AC006116.8	-0.0791959	1.13192	0.739523	NA	-2.54869	0.210843	0.346586	0.875591
AC006130.1	0.378106	0.277943	0.0249082	NA	-0.247106	-1.61838	-1.59343	-0.328662
AC006141.1	-0.133034	-0.613537	-0.278893	NA	-2.13895	0.191754	0.0182473	0.373625
AC006145.1	0.268353	0.720381	0.783263	NA	-0.328326	-0.0311637	0.0996383	1.35942
AC006148.1	0.180618	-0.0710936	-0.375274	NA	-0.510767	0.913746	0.619321	0.588103
AC006157.1	0.221674	0.68464	0.255118	NA	-0.0323293	-0.491477	0.0978213	-0.0349183
AC006160.1	0.172916	0.38689	0.381824	NA	-1.51504	0.244889	1.28627	1.45504
AC006213.2	0.0567564	0.434222	0.721223	NA	0.107818	1.18323	-0.124968	-0.0374456
AC006213.3	-0.931291	1.39078	2.00819	NA	0.105786	0.0646678	-1.0503	0.0403963
AC006230.1	-0.465196	0.142843	3.19014	NA	-0.0250282	0.348773	0.0799442	0.554154
AC006249.1	0.111438	1.08693	0.766099	NA	-0.205825	0.577794	0.0516063	-2.00858
AC006262.1	0.296127	-0.454387	-3.67757	NA	0.574634	0.120166	0.157015	0.222485
AC006262.2	0.0286956	1.7065	0.403901	NA	-0.705985	-0.0999438	-0.0646989	0.872592
AC006270.1	-0.39176	0.725398	0.221731	NA	-0.286828	0.580454	0.0272785	0.41733
AC006299.1	-0.99329	-0.717835	-0.373426	NA	-1.89521	0.708418	1.03516	0.844047
AC006305.1	0.578908	2.12385	0.246689	NA	0.333342	-0.391385	-0.623304	-1.19375
AC006333.2	0.628476	0.856556	0.122467	NA	0.0124988	-0.322369	-1.5685	-0.297211
AC006348.1	-0.309956	1.05225	0.814627	NA	-0.362785	-1.42691	-0.441602	1.06988
AC006355.2	0.23136	1.30319	1.31192	NA	-0.574286	-0.348451	-0.366973	0.505561
AC006378.1	0.406541	2.08387	1.02517	NA	0.0852493	-1.20669	-0.190162	0.362888
AC006387.1	0.0835536	1.00662	0.717017	NA	-1.65528	0.206791	0.976444	1.68015
AC006427.2	0.221518	0.00441825	-0.0491526	NA	-0.158888	-0.396493	0.0746371	0.649343
AC006435.2	-0.484789	-0.268501	0.119038	NA	0.253629	-0.569211	-0.175134	-0.0836859
AC006445.3	0.365273	-0.0684924	0.318908	NA	-0.0787709	0.466513	0.407963	0.300334
AC006449.2	0.244258	-0.259406	-0.417925	NA	0.00362894	0.891551	-0.11585	-2.21215
AC006449.3	-0.292611	0.434826	0.425981	NA	-0.0997661	-0.234219	-0.603857	0.187503
AC006449.6	-0.608141	0.0246211	-0.114871	NA	0.167686	-0.097001	-1.87607	-0.294845
AC006460.1	0.0864832	2.1325	0.948599	NA	-0.301501	-0.3907	-0.0663516	0.241347
AC006460.2	-0.689567	2.79476	2.2744	NA	3.37408	-0.513885	-2.22129	0.90925
AC006480.2	0.0306132	0.698905	1.22345	NA	-0.107343	-0.000678436	0.0423206	0.526719
AC006504.1	0.0756065	-0.194748	-0.390247	NA	-1.05125	0.765573	0.0865511	-0.0470412
AC006504.2	-0.00212051	2.29961	2.49842	NA	0.0903145	-0.321759	0.161389	1.71139
AC006504.5	-0.327013	0.45153	1.56991	NA	-1.34689	-0.334772	-0.0251427	1.44276
AC006511.4	-0.779626	-0.101608	0.211475	NA	-0.290876	-3.65019	-0.957473	0.204978
AC006511.6	0.0276527	-0.213769	-0.366016	NA	1.64279	0.0165251	-0.193531	-0.858439
AC006547.1	1.20241	0.794978	0.0319444	NA	-0.119602	0.00871496	0.201238	0.575956
AC006581.1	0.204895	2.78216	0.547553	NA	-0.0541408	-0.0291688	-0.359448	0.115126
AC006581.2	0.479025	0.621472	0.0268752	NA	-0.724876	0.235028	0.123319	0.625909
AC006942.1	0.812074	1.50953	0.281975	NA	0.649906	-0.0673819	-0.394648	-0.19984
AC006960.3	1.49612	1.76475	1.31054	NA	-0.659675	-1.19996	-0.266146	1.15573
AC006972.1	0.172423	1.10237	0.561955	NA	0.142152	-0.266978	0.988309	0.461182
AC006974.1	0.0935625	-0.475902	-0.580683	NA	-0.80179	0.104939	-0.127511	3.62755
AC006974.2	0.120245	0.62056	0.0594588	NA	-0.818167	2.47335	1.08562	3.83877
AC006994.2	-0.0972232	-0.900188	-1.3458	NA	5.51631	0.0635817	-0.910443	0.169141
AC007014.1	0.0298198	1.20365	0.854645	NA	-0.815642	0.172197	1.51655	1.4443
AC007038.1	-0.257116	0.627477	0.411486	NA	-0.452698	-0.0823011	1.02104	1.34432
AC007038.2	-0.143151	0.762884	0.568091	NA	-0.98098	-0.381229	-0.300965	0.0322596
AC007040.1	0.174174	0.644847	0.661344	NA	0.359825	0.496763	-0.0604365	-0.389082
AC007066.2	-0.00623486	0.107423	0.431701	NA	-0.150236	-0.58389	-0.53907	0.0414173
AC007098.1	-0.0811156	1.17358	0.82921	NA	-0.364188	-0.265847	-0.74761	2.22754
AC007100.1	0.29513	0.356919	-0.0173107	NA	0.221928	-0.561843	-0.652494	0.149148
AC007114.1	-0.19153	0.530639	0.711273	NA	1.05202	0.504134	1.3861	-0.0582051
AC007114.2	-0.00162184	1.81591	1.00736	NA	-0.390907	-0.848024	-0.328912	2.25468
AC007130.1	0.0803157	0.878937	0.648532	NA	-0.710345	0.764476	0.166355	0.73509
AC007179.1	-0.117717	0.295397	0.0412621	NA	-0.518782	-0.125935	-0.484241	-0.179159
AC007193.1	0.191451	0.621469	0.735279	NA	0.0401117	1.26801	0.21527	0.796363
AC007216.1	0.0793906	-0.0585264	-0.0391966	NA	0.936291	-0.468897	-0.763273	0.253666
AC007216.2	1.63595	1.32441	0.414091	NA	-0.106671	4.29969	1.36044	-0.143672
AC007216.3	-0.351647	0.271245	0.636817	NA	-1.13535	0.0759179	0.178605	0.859143
AC007216.4	-0.0418043	0.865029	1.44923	NA	-2.08617	0.353618	2.11299	0.923765
AC007218.1	-0.991629	-0.000174599	0.680563	NA	0.0304286	-1.13437	-0.153641	-0.487097
AC007218.2	-0.361947	-0.00858173	0.461302	NA	0.474103	-0.183363	-0.199188	-0.260731
AC007218.3	-0.562284	-0.321045	0.150775	NA	1.52801	0.0271282	-0.234882	0.117292
AC007220.1	-0.487998	-1.02981	-0.370334	NA	1.12292	-0.804222	-0.0279601	0.292455
AC007220.2	-0.122462	0.130106	0.313925	NA	0.572788	-0.971344	-0.441136	1.41405
AC007221.1	-0.919513	-0.0659844	0.270277	NA	0.785766	-0.118665	-0.0960064	-0.00106141
AC007255.1	0.0204156	2.39104	1.95015	NA	0.0999194	-0.891377	0.0300161	-0.10986
AC007262.2	-0.373785	-3.06247	-0.0545368	NA	0.460719	0.0243518	-1.66449	-0.378579
AC007277.1	-0.0688775	1.10574	0.939955	NA	0.655363	0.282567	1.30921	1.01065
AC007279.2	0.476424	1.51376	0.84382	NA	-1.76161	-0.0509836	0.37694	1.10856
AC007285.1	0.188464	0.0712238	0.478259	NA	0.127818	-0.108475	-0.243872	0.206096
AC007285.2	0.239231	0.550066	0.497341	NA	0.318109	-0.34265	0.20008	0.52246
AC007292.3	-0.244426	-0.213582	0.181642	NA	-0.0905837	0.206918	0.1716	0.00771089
AC007298.2	0.631753	0.38245	0.139825	NA	-0.254397	0.187321	1.06262	1.57207
AC007314.1	0.272464	0.791098	0.775324	NA	-2.84239	0.361966	0.488928	0.261512
AC007319.1	0.267235	0.879323	-0.0377752	NA	-0.391707	3.22002	2.40523	0.871201
AC007325.4	0.767254	0.0857448	0.00228042	NA	0.0206984	0.312277	-0.941714	-0.0756027
AC007326.5	0.352076	-0.245866	0.233999	NA	1.72436	0.336247	-0.106998	-0.192642
AC007327.2	0.57936	0.202219	0.557138	NA	-1.80155	0.740715	1.77219	0.550902
AC007336.1	-0.0617898	0.853056	0.65404	NA	-0.781059	1.0682	0.865277	0.246099
AC007336.2	0.00622584	-1.82661	-0.358152	NA	1.46606	0.010723	0.123169	0.3995
AC007342.4	0.0964323	1.06485	1.3457	NA	0.822826	0.126913	-0.780975	0.558596
AC007342.5	-0.605615	-0.393259	0.460252	NA	-1.26895	-0.386279	-0.400983	0.486171
AC007344.1	0.114954	1.91464	1.52367	NA	-0.183294	-1.91116	-0.874377	0.166669
AC007347.1	-0.133811	1.31532	1.07856	NA	-0.768896	-0.481975	0.189681	1.52738
AC007349.2	0.400743	2.00203	0.3125	NA	-2.62565	-0.124068	-1.67816	-0.182305
AC007364.1	-0.414373	-0.0428366	0.123685	NA	-0.335228	0.185753	-0.0279132	0.389082
AC007365.1	-0.468045	0.812821	0.35947	NA	0.728732	0.53828	0.323906	0.954542
AC007370.1	1.29995	0.34518	-0.165221	NA	0.679885	-1.08557	0.0671077	0.203561
AC007370.2	0.199819	0.469549	0.394658	NA	0.175711	-1.76045	-1.15666	-0.0975592
AC007376.2	-0.106519	-1.08332	-0.230189	NA	0.75358	-0.280531	0.00709463	-0.643049
AC007383.2	-0.470319	-1.77518	-0.900257	NA	-0.217152	-0.208042	-0.124315	0.0457793
AC007383.3	0.220133	0.888378	1.64956	NA	0.610517	-0.487036	-0.698083	0.328337
AC007384.1	-0.0864909	0.705918	0.620401	NA	0.0552125	-1.52738	-0.878609	4.33933
AC007387.2	0.21996	-0.0644605	-0.213295	NA	1.12935	-0.0246714	0.0220594	0.143524
AC007387.3	0.0595152	-0.0283291	-0.0731189	NA	1.25584	0.395423	-0.145956	-0.728276
AC007389.1	-0.196358	0.275666	0.00615629	NA	-1.31984	1.63539	0.917074	0.069669
AC007389.3	-0.0533717	0.38974	0.407667	NA	-1.72695	1.11374	1.59945	0.242573
AC007390.2	0.230515	0.193124	2.71779	NA	-1.06402	-0.10884	0.370978	-0.201048
AC007402.1	-0.115034	0.4209	0.0367263	NA	-0.112322	-0.169864	0.18941	1.21915
AC007405.1	0.047147	-0.516777	-0.241379	NA	-0.0788752	1.91646	1.23634	0.736131
AC007405.3	0.50181	0.130094	-0.19286	NA	-0.369315	-0.11769	-0.319584	-1.58877
AC007406.5	-0.461914	-0.0475029	0.154739	NA	1.03364	-0.0905555	-0.151239	0.15435
AC007431.1	-0.902779	0.178739	0.435172	NA	1.16796	0.182761	-0.668671	0.803052
AC007431.2	0.114461	0.558391	0.336016	NA	-0.0626705	-0.190226	0.766522	1.02364
AC007448.3	-0.111188	0.854019	0.623835	NA	-0.00931363	-0.673699	-1.80975	-0.0902394
AC007448.4	0.300028	0.540676	0.158518	NA	0.321038	0.779617	0.551029	-0.287448
AC007448.5	-0.0385439	-0.0747312	-1.76045	NA	5.82144	0.950367	0.605254	-0.0143566
AC007493.1	0.295511	0.351453	0.992986	NA	-0.419148	0.142355	0.454314	0.339595
AC007494.2	0.334401	1.89969	0.537512	NA	0.126714	0.0171539	-0.0716576	1.41293
AC007496.2	-0.0585496	0.393802	0.55099	NA	-0.587982	0.559405	0.912128	0.455997
AC007529.2	-0.0384698	0.135278	-0.419192	NA	-0.557739	1.13283	0.997836	0.092801
AC007533.1	0.19726	1.67849	1.10687	NA	-0.148978	0.165319	0.318046	1.75395
AC007541.1	-0.589197	-0.15785	-0.00873989	NA	-0.535296	-2.72405	-4.80125	-2.95707
AC007566.1	-0.520391	0.066824	0.0570514	NA	-0.897534	-0.173963	1.27054	0.59837
AC007598.2	-0.204634	0.698937	1.05651	NA	-0.982664	-1.3562	0.181951	1.27022
AC007601.1	-0.308164	1.27059	1.72449	NA	0.613856	-0.742125	-0.236369	0.822997
AC007610.1	-0.196866	1.50056	0.398025	NA	-0.0183279	-0.605922	0.221926	0.800991
AC007610.2	0.0870953	0.202314	-0.124983	NA	-0.447098	-0.126852	0.206403	-0.108059
AC007613.1	0.369526	0.235399	0.206668	NA	2.80967	0.5371	0.0524561	-0.196448
AC007614.1	-0.36604	-0.59815	0.192555	NA	1.22586	-1.39333	-2.63417	0.0338725
AC007619.1	-0.542266	0.151918	0.393143	NA	-0.501413	-0.150073	0.384275	0.558438
AC007620.2	-0.277198	0.0495621	0.287243	NA	0.266191	0.558046	-0.403554	0.07288
AC007622.2	0.0286879	1.18915	1.28519	NA	-0.494475	-0.38366	-0.139621	0.43793
AC007655.2	-0.684582	-0.0956091	0.138107	NA	-0.00907719	-0.0985789	0.226516	-0.109287
AC007663.3	1.52821	1.10002	0.434712	NA	-0.816188	0.801666	0.355412	-1.30373
AC007666.2	0.0456442	2.79175	1.7475	NA	0.617563	-0.00427395	0.750598	1.74633
AC007681.1	-0.0715463	0.698486	0.596442	NA	0.605006	0.0633677	1.08192	0.275154
AC007684.2	-0.354865	0.0819223	0.396832	NA	-0.408731	-0.133332	-0.0535377	0.385902
AC007686.3	-0.122093	0.433999	0.294287	NA	-0.385223	0.0982299	0.827597	0.872175
AC007695.1	0.416203	1.88903	1.10863	NA	-0.306052	0.571738	-0.141057	-0.238179
AC007728.1	0.467778	2.15899	1.51986	NA	0.1178	-0.336571	0.0967661	1.93495
AC007773.1	-0.788744	0.153823	0.0275714	NA	-0.34165	-0.0835295	0.147741	0.402728
AC007780.1	-0.794482	-0.363886	-0.492821	NA	-0.245958	-0.214868	1.80799	0.798031
AC007785.1	0.557278	0.0160904	-2.59987	NA	0.480333	0.268398	-0.150339	0.427716
AC007785.3	-0.597692	-0.203255	0.141809	NA	-0.265795	-0.244144	0.639789	-0.0217186
AC007786.1	-0.828573	-0.214508	-0.477187	NA	0.462745	0.183791	-0.140395	-2.30345
AC007823.1	-0.493221	-0.31856	0.189649	NA	1.99259	-1.48479	-1.92867	-0.824329
AC007878.1	-1.08111	-1.50568	-0.330189	NA	0.750019	-0.51805	-0.526617	-0.034162
AC007881.3	0.588076	0.0877565	0.0670745	NA	0.122147	0.162261	-0.298056	0.0943727
AC007881.4	0.060609	1.22905	1.1938	NA	1.34502	-0.0464761	0.0172697	0.498892
AC007938.3	-0.67867	0.257023	0.447032	NA	-2.27695	-0.137989	-0.00708953	-0.176325
AC007952.4	-0.0631311	-0.0439141	-0.197475	NA	0.443296	-0.686354	-2.18028	0.175871
AC007996.1	0.24601	-0.352851	-0.483521	NA	-0.244377	1.07604	-0.239463	-1.96787
AC008014.1	-0.121957	-1.87923	-2.21732	NA	1.29082	0.279633	2.17212	-0.171607
AC008026.3	1.02482	-0.0685026	-0.922035	NA	-1.33804	0.0887397	0.509558	0.689607
AC008040.1	0.104441	0.364835	0.420503	NA	-1.43976	-0.118811	-0.276224	0.129628
AC008050.1	-0.279351	-0.912351	0.078901	NA	1.99736	-0.999175	-0.0164741	-0.591416
AC008056.1	-0.631316	-0.162817	0.702071	NA	-0.0722254	-0.511914	0.239491	2.31412
AC008056.2	-0.411367	-0.0392117	0.718822	NA	0.198292	-0.632083	0.0755496	2.94363
AC008060.1	0.0267338	0.629782	0.63429	NA	-0.440629	0.322568	-0.319693	0.0410098
AC008063.1	-0.105862	0.480982	0.795857	NA	0.122383	0.032445	0.0538266	-0.0874945
AC008079.1	0.11147	1.34706	1.57342	NA	-2.98173	0.781709	1.70274	0.259842
AC008080.3	0.175714	1.47324	-0.105464	NA	0.633414	-0.368355	-0.588894	0.641761
AC008080.4	-0.294799	4.80966	1.9135	NA	-2.17082	-0.27314	-0.0328577	0.305876
AC008119.1	0.0219019	1.71569	1.18966	NA	0.474115	0.135741	0.627573	1.31052
AC008124.1	-0.356101	0.00237039	0.355459	NA	0.984518	-1.47533	-3.61287	-0.669025
AC008147.1	-0.219048	0.883154	0.666142	NA	-0.345784	-0.169245	0.702712	0.359634
AC008147.2	0.0114812	0.352234	-0.118252	NA	0.109786	-0.307952	0.00815733	-0.230196
AC008264.2	-0.102168	-0.592727	0.12382	NA	1.21578	0.0358643	0.0939282	1.77884
AC008267.5	0.246727	0.967509	0.958412	NA	-1.86952	-0.0213814	0.265064	-0.686649
AC008269.1	-0.355353	0.815	1.1809	NA	0.713345	-0.253281	-0.360525	0.859281
AC008277.1	0.153296	1.18947	0.630339	NA	-1.19479	0.257906	0.7609	1.7084
AC008280.3	-0.226331	-0.436456	-0.656354	NA	0.128941	-0.144433	-0.16378	-1.10949
AC008393.1	-0.494568	-0.206087	0.122569	NA	-0.482109	-0.566523	-0.859651	-0.445833
AC008403.3	0.671871	0.960567	1.50547	NA	0.755782	0.407595	0.921585	0.551186
AC008415.1	-1.98557	-0.0830861	-0.137627	NA	0.279772	0.481782	1.41509	0.48748
AC008429.1	0.682499	0.933296	0.164616	NA	-0.19592	0.804454	0.786401	0.0257594
AC008438.1	-1.42767	-0.144372	1.00611	NA	0.562361	0.145646	-0.366308	-2.76484
AC008443.1	-0.25752	-0.222571	0.00522902	NA	0.139507	-0.0607306	0.44837	0.348552
AC008443.5	1.73975	-0.262078	-4.1318	NA	1.57152	0.446777	-0.336915	-0.784526
AC008459.1	0.420312	-0.499418	-2.66598	NA	0.57833	0.268544	0.974878	-1.00321
AC008462.1	-1.85913	-0.76663	-0.274219	NA	0.633646	-0.47905	-0.62528	0.841281
AC008474.1	0.131142	0.75896	1.20945	NA	-1.18134	-0.880162	0.110427	1.56765
AC008537.2	0.820961	1.86029	0.0467644	NA	0.370418	-0.186539	0.0129269	0.582237
AC008537.4	-0.0997546	0.868608	0.228165	NA	-0.244697	0.427901	0.710271	0.371784
AC008543.1	-0.877972	0.695773	0.332883	NA	0.0441073	-2.48877	-0.0672864	-0.01604
AC008549.2	-0.327327	0.484156	0.70044	NA	1.36182	0.617112	0.0630659	-0.139433
AC008551.1	-0.0234785	0.956322	0.658002	NA	-1.37834	0.138111	1.62104	0.783897
AC008554.1	-0.2782	0.232761	0.206534	NA	0.605252	0.591242	0.208814	0.176846
AC008555.2	-0.14335	0.432129	0.0550671	NA	-1.73271	0.165313	-0.0964176	0.289089
AC008555.4	-0.489315	1.4447	1.42998	NA	-0.805624	-1.16913	-1.29151	-0.289713
AC008555.5	-0.00342888	-0.117665	0.196932	NA	1.22497	-0.459264	-0.1533	-0.111856
AC008569.2	-1.33319	0.12663	1.01404	NA	0.0642965	0.420563	-0.154841	-2.05635
AC008571.2	0.061782	-0.327674	-0.0916149	NA	0.776305	0.57498	0.055338	-0.0950693
AC008574.1	-0.523705	-0.0855907	0.442593	NA	0.0439113	-0.637084	0.420942	1.81384
AC008591.1	0.218633	0.382936	0.266723	NA	0.639848	-0.37629	-0.744172	-0.255324
AC008608.2	1.20686	-0.118995	-2.4131	NA	0.937067	0.791126	0.040481	-7.13103
AC008609.1	-0.10447	0.713098	0.886804	NA	-0.134211	-0.747984	-2.73193	0.0746464
AC008610.1	-1.03929	-1.15293	0.101021	NA	9.26766	1.01589	-0.427658	-1.56657
AC008629.1	-1.578	-0.830952	0.139055	NA	0.285502	1.64537	0.0559877	-0.722258
AC008649.1	-0.0969844	0.936722	0.159951	NA	2.38624	1.09151	-0.270321	0.726748
AC008649.2	-0.237808	-0.142431	0.0953123	NA	0.00367904	-0.418996	-0.692651	0.0907313
AC008655.2	0.175879	0.658376	0.0623629	NA	1.4161	-0.245876	-1.54102	-0.0536352
AC008667.1	0.800993	1.1557	1.1484	NA	0.734656	-0.86181	0.0693372	0.746961
AC008676.1	-0.301699	-0.0840416	-0.0570267	NA	0.386624	-1.72405	0.115951	-0.198037
AC008679.1	-0.224193	0.171148	0.348685	NA	-1.58358	0.0229723	0.0918796	0.117536
AC008691.1	0.56913	-0.330756	-1.9769	NA	-0.086175	0.447436	2.18746	0.838475
AC008696.2	-0.150495	0.46209	0.44901	NA	0.0484558	0.211859	0.678223	0.00118722
AC008700.1	-0.0722842	0.814537	0.920892	NA	-0.133447	-1.09511	0.319656	1.48038
AC008708.2	0.703512	1.27224	0.171246	NA	1.00219	0.52859	0.319417	0.701488
AC008728.1	-0.0347203	0.974725	0.837265	NA	-0.366575	-0.888044	0.249578	2.98928
AC008731.1	0.148966	1.10455	0.775277	NA	-0.773975	-0.0985867	1.03633	1.20727
AC008735.1	1.05183	3.00494	1.41263	NA	-0.635187	-0.277661	0.431388	-0.924692
AC008735.2	0.0479481	0.922703	0.607847	NA	-1.20403	0.141671	0.209438	0.123328
AC008736.1	-0.333335	0.658065	0.720426	NA	0.0980097	-0.513483	-0.121653	1.06566
AC008738.1	-0.119425	1.11371	3.40757	NA	-0.243682	-0.577009	-0.608744	0.392195
AC008751.3	-0.206774	-1.02561	0.200075	NA	0.5129	0.847253	0.228809	0.0316627
AC008758.2	0.0313139	1.10777	0.752857	NA	0.402256	-0.866109	-0.721713	0.586309
AC008761.1	0.0943801	0.719491	0.0149711	NA	0.763282	-0.334149	-0.822059	-0.890965
AC008764.2	0.497877	0.870693	0.883591	NA	-0.300795	-0.744508	-0.0933542	0.419877
AC008764.6	0.202027	-0.194036	-0.251455	NA	-0.1595	-0.244806	-0.473354	0.699535
AC008764.7	-0.34464	-0.423909	0.528984	NA	0.834623	0.769814	0.384227	-0.0558049
AC008764.8	0.946049	-0.0988298	-0.511594	NA	0.508501	-0.401147	-1.17059	0.0413704
AC008770.3	0.114154	-0.200161	0.0812328	NA	0.280661	-1.0557	-1.08218	-0.212223
AC008771.1	-0.0644244	0.95171	0.818103	NA	-3.91615	0.0187896	0.819066	0.711671
AC008781.1	0.101931	1.21129	0.780179	NA	2.33071	0.0415442	0.337675	0.90878
AC008781.2	0.42843	1.13399	0.752923	NA	0.580968	0.26308	0.0937849	2.42425
AC008870.2	0.573437	0.64961	0.0221723	NA	0.06448	-0.0893602	0.230739	-0.0140771
AC008870.4	-0.415658	0.852435	1.17028	NA	0.288543	-0.0798423	-0.64928	0.772047
AC008871.1	0.00415954	0.376087	0.340239	NA	0.052691	1.46446	0.703137	0.0139856
AC008883.1	-0.0493831	1.16803	0.62597	NA	-1.12538	0.358501	1.25591	0.689074
AC008883.3	0.0157286	-0.417416	-0.179207	NA	-0.123511	-0.0421764	0.469679	0.153478
AC008892.1	-0.0353417	0.769931	0.506358	NA	1.62636	-0.21497	0.369553	1.97618
AC008894.2	0.604915	0.464688	-0.142709	NA	-0.0447901	0.167304	0.69278	0.198386
AC008906.2	-0.319169	0.35611	0.991841	NA	-0.357401	-0.430719	-0.596348	0.570604
AC008915.1	1.12793	4.7683	1.08682	NA	0.0733637	0.516301	1.27554	1.14791
AC008915.2	0.025052	-0.449216	-0.285813	NA	-0.991615	-0.322427	-0.434123	0.252187
AC008937.2	0.42509	0.870205	0.887624	NA	-0.64514	-0.0545164	0.424754	1.72312
AC008938.1	0.283038	0.949009	0.863355	NA	1.37995	-0.20568	-1.39647	0.466039
AC008946.1	1.0748	1.68058	1.46972	NA	3.77946	0.200572	0.0603766	0.576368
AC008957.1	0.349007	0.115438	-0.19856	NA	-1.81775	0.581109	0.528443	0.675967
AC008966.1	-0.159943	-0.583193	-0.667711	NA	-0.0854411	0.508685	-0.865637	-0.716475
AC008969.1	-0.0459501	0.270624	0.0402327	NA	-0.0562606	-3.42917	-1.47992	0.806536
AC008969.2	0.0932356	0.034144	0.198913	NA	1.07263	0.0911597	-0.204624	-0.365074
AC009034.1	1.63025	1.06934	1.62428	NA	-0.499502	-0.388369	-0.286398	-0.914572
AC009041.2	1.11506	0.307033	-0.372781	NA	-0.173845	0.419985	-0.0135435	0.264523
AC009053.3	-0.343814	0.758091	0.925122	NA	-0.512842	-0.857838	-0.991389	1.92283
AC009060.1	0.239624	1.24674	0.456865	NA	1.10178	0.283378	0.126024	0.305601
AC009061.2	-0.326304	0.294369	0.489939	NA	1.20983	0.193189	0.912963	0.292729
AC009065.1	-1.19521	-6.57646	-0.963863	NA	0.250345	0.0290572	-0.847692	-3.4488
AC009065.4	0.44736	-0.0778477	-0.674219	NA	0.12758	0.0953476	0.0925895	1.11261
AC009065.8	-0.185208	0.291321	0.26939	NA	0.142408	-0.878885	-0.0039737	0.549121
AC009090.6	-0.0870898	1.19256	0.814716	NA	-1.52008	0.00252491	0.305651	0.126221
AC009097.1	-0.0513955	0.915198	0.805371	NA	-0.288753	-0.180744	0.325128	0.0428662
AC009107.2	-0.0801876	0.194302	0.0845757	NA	-0.232688	0.740863	1.65838	1.8126
AC009113.1	-0.175118	0.0744485	-0.109823	NA	-1.11736	0.270368	-0.155845	-0.114915
AC009118.3	-0.284575	-0.107915	0.12601	NA	-0.603586	0.298926	-0.140725	-0.444434
AC009120.2	0.193063	-0.430802	-0.484445	NA	-1.21775	1.50708	3.84771	3.43829
AC009120.4	0.11285	0.706047	0.617287	NA	0.0644772	1.69555	1.36057	-1.38857
AC009120.5	-0.0570748	-0.0374004	0.423376	NA	-1.09526	-0.0219261	0.00572507	-0.197502
AC009126.1	-0.130549	-1.79706	-0.640279	NA	-0.0791977	-0.607334	0.116058	0.207396
AC009133.1	-0.00694336	0.78365	0.87621	NA	0.125039	-0.0431549	0.69136	1.3378
AC009133.4	0.420815	0.958284	1.22471	NA	-0.154217	0.912611	0.115882	0.430074
AC009137.1	0.177422	1.88065	0.665559	NA	-0.0256912	0.00190429	-0.171352	-0.0412873
AC009139.1	0.134783	0.122783	-0.567984	NA	-0.000124267	0.133467	0.843565	1.03467
AC009139.2	-0.0156432	1.08609	0.359797	NA	-0.1422	-0.920284	-0.0302815	1.76665
AC009145.3	-0.263731	1.07648	0.749583	NA	-0.0454087	0.759558	0.350985	1.12749
AC009148.1	0.0470016	-0.12655	-0.105257	NA	0.809253	0.793924	0.167349	1.19866
AC009152.3	-0.0282394	0.664557	0.671478	NA	-1.07491	0.0360356	0.890206	2.10305
AC009152.6	0.0254443	0.706679	0.755001	NA	-1.23346	0.15697	0.57209	0.932593
AC009163.1	-0.187518	0.355297	1.99544	NA	2.19874	-0.111679	-0.433515	0.521216
AC009163.7	-0.846856	-0.735248	-0.462568	NA	0.757696	-0.285277	-2.11266	-0.00872686
AC009226.1	0.728424	1.43926	0.240451	NA	1.72943	-0.175087	1.80631	-0.0211612
AC009227.1	0.0719666	0.896184	0.503948	NA	0.759593	0.244035	0.30075	0.400002
AC009228.1	-0.424258	0.719986	0.756607	NA	1.73006	-0.327102	-0.882111	-0.349154
AC009237.14	0.508931	0.420904	-0.370933	NA	-0.938792	0.184589	-0.336539	-0.2737
AC009242.1	-0.169171	0.957771	0.911189	NA	0.36806	-0.453202	0.522155	1.13699
AC009244.2	0.978708	2.13797	0.72965	NA	0.308078	0.443169	0.417818	1.10677
AC009262.1	-0.5366	0.609132	1.25021	NA	-0.297397	0.345616	0.333892	0.728729
AC009269.2	-0.220478	0.383765	-0.0728966	NA	0.363419	0.438289	0.599837	0.093626
AC009275.1	-0.00120583	0.973889	1.28884	NA	-0.465852	0.907872	0.10102	-4.63494
AC009283.1	-0.624911	-0.574865	-0.37401	NA	-0.163382	0.727559	1.55597	0.0160974
AC009299.3	-0.0142551	0.530232	0.424565	NA	1.41836	-0.819516	-0.81799	0.0707801
AC009303.2	-0.151148	1.10584	1.41268	NA	-0.43584	-0.488128	-0.472978	-0.104384
AC009309.1	-0.0938149	-0.238027	-0.125877	NA	1.51566	0.303462	-0.154631	-0.632763
AC009315.1	-0.499139	0.303674	0.298554	NA	0.00624916	1.56198	0.371959	0.233269
AC009318.1	0.240816	1.02354	2.5091	NA	-0.572694	-0.22322	1.30762	0.344133
AC009365.4	0.150813	1.47343	0.795397	NA	-0.64096	0.0549642	0.0892345	0.811818
AC009403.1	0.404657	0.191461	-0.228367	NA	-0.578643	0.854584	0.00728281	0.0144796
AC009403.2	0.424278	-0.183465	-1.37686	NA	3.45638	0.0718008	-0.33261	0.894213
AC009404.1	0.0366866	0.00425881	-0.0342209	NA	-1.17064	-0.096421	-1.00698	-1.99236
AC009480.1	0.0677929	0.470915	0.0796105	NA	-0.409432	0.338929	0.416734	0.0527653
AC009486.2	-0.43528	-0.0305325	0.0175589	NA	1.08927	1.57028	1.01486	-0.76282
AC009495.1	-0.82275	-1.46873	-1.35057	NA	3.59154	1.50913	0.476566	0.223288
AC009501.3	-0.0303583	1.01687	0.661836	NA	-0.500891	-0.101156	0.780336	1.73927
AC009505.1	0.114733	0.609568	1.0802	NA	-0.548282	-0.189891	-0.0930341	0.708557
AC009506.1	0.261116	0.994736	0.248667	NA	-0.230942	-0.0552909	-2.53114	-1.23249
AC009522.1	-1.0783	-2.26574	-1.07666	NA	0.727395	-2.94256	-1.12831	-0.103217
AC009542.1	0.212596	1.18738	0.226293	NA	-0.696856	0.478541	1.03738	1.21373
AC009554.1	-0.0334794	1.04563	0.731508	NA	0.0757406	-0.0443002	0.318956	1.12114
AC009558.1	0.316738	0.08567	-0.144735	NA	-0.159109	-0.4376	-2.83583	-0.0844042
AC009560.1	0.806128	0.714441	1.46618	NA	-0.162481	-0.0786673	0.505935	-1.27057
AC009560.3	-0.099556	1.50613	2.3313	NA	-0.163956	0.34531	0.249377	0.348333
AC009560.4	0.670034	0.00630128	-0.405524	NA	-0.432265	-0.10353	0.390934	-0.224012
AC009563.1	0.297996	1.77351	1.0812	NA	-0.845631	0.414802	-0.0141234	-0.991296
AC009570.1	1.12538	0.199246	-0.561841	NA	-0.244635	-0.144167	-0.117709	-0.00716473
AC009630.1	-0.0842813	0.564596	0.395253	NA	-1.03713	3.37598	2.36256	1.08582
AC009686.1	0.242674	0.309599	0.0475306	NA	-0.10765	0.224847	0.32469	0.616761
AC009686.2	7.25275	0.177737	-1.16221	NA	-0.0572807	0.433569	0.0950718	0.0482571
AC009690.2	-0.16424	2.51672	1.93751	NA	0.369873	0.27851	0.940935	0.101896
AC009716.1	0.115509	1.12435	0.621264	NA	-0.100101	0.231738	0.975125	0.762135
AC009754.2	-0.920147	0.103516	0.866264	NA	0.936437	0.334168	-0.393296	-1.11427
AC009779.2	-0.33589	-0.30653	-0.484782	NA	1.25283	-0.442531	-3.44351	-0.7864
AC009812.1	-1.1096	-0.796655	-0.0938696	NA	0.160851	0.0232472	-0.586157	-1.51006
AC009831.1	0.116266	0.399543	0.0560361	NA	-0.571681	-0.720927	-0.771355	-0.329388
AC009879.4	-0.359876	-0.372655	0.568332	NA	-0.391566	0.145572	0.426065	0.327297
AC009884.1	0.335165	0.272182	0.357504	NA	0.280924	0.0525481	0.245976	0.0178936
AC009899.1	-0.397229	-0.00638929	0.134545	NA	0.143518	0.599468	0.0540681	0.839328
AC009950.1	-0.16877	-0.182697	-0.316518	NA	1.01995	-0.574823	1.107	0.00543436
AC009955.4	-0.61541	-8.92634	-4.65187	NA	1.49389	-1.25281	-2.08628	-0.35229
AC009961.1	-0.456079	-1.28859	-1.49722	NA	1.55066	-0.64849	-1.30926	0.589709
AC009962.1	-0.23123	-0.0888537	0.00896985	NA	-0.426912	0.0995748	0.486974	1.61258
AC009974.2	0.0294842	1.24005	0.762351	NA	2.97674	0.353252	1.44304	0.973924
AC009975.1	1.26443	-0.160258	-0.589397	NA	-0.282589	-0.735667	0.0525123	0.733019
AC009996.1	0.126613	1.09204	0.306442	NA	-0.694614	-0.0188603	0.0685278	-0.196598
AC010092.1	-0.909993	-0.923397	-0.845366	NA	0.27162	-0.197876	-0.0436053	-0.156776
AC010148.1	-1.59626	0.269855	3.03097	NA	-0.782948	0.186494	0.0897524	0.60109
AC010157.1	0.204932	1.41545	1.04993	NA	-0.0375747	0.225767	-0.0354051	0.896153
AC010168.1	-0.0367072	0.99833	0.63652	NA	1.96482	-0.958287	0.150162	0.264119
AC010168.2	0.0718254	-0.895643	-0.621014	NA	6.89449	0.491627	0.604127	0.242137
AC010175.1	-0.150079	-0.178325	0.0879928	NA	0.363384	-0.602825	-0.286428	-0.352254
AC010198.1	-0.0824362	-0.524984	-0.53063	NA	-0.379996	0.12559	0.48529	-0.0436786
AC010201.1	-0.904766	-0.103062	-0.0130698	NA	0.186216	1.26867	0.214589	0.461792
AC010201.2	0.717611	0.759773	0.279847	NA	-0.406702	0.900973	0.150574	0.288884
AC010201.3	-0.0997778	1.59499	0.416375	NA	0.483916	-1.00531	-0.539356	0.439821
AC010207.1	-0.448776	0.333703	0.771889	NA	0.247772	-1.34922	-2.49976	0.461424
AC010210.1	-0.96023	-0.0926677	0.257401	NA	0.393974	-0.0514205	0.183918	0.265268
AC010226.1	-0.331666	0.535191	0.668893	NA	1.01993	-1.67691	-2.39122	-0.0825324
AC010260.1	0.185604	0.977016	0.401263	NA	0.260149	0.859674	0.650208	0.732791
AC010273.2	0.390254	0.805962	0.57651	NA	-0.325717	0.225471	0.845799	0.529717
AC010285.3	0.00929646	1.30035	1.43852	NA	0.135423	0.00189094	-0.346142	0.744696
AC010307.2	0.00837411	1.98085	0.993215	NA	1.95806	-0.67697	-0.733708	2.79215
AC010307.3	-0.0849241	2.18784	1.9901	NA	-0.415932	-0.0582566	0.0197993	1.49196
AC010307.4	0.00615382	1.45765	1.00236	NA	1.19036	0.0285081	-0.806055	1.74639
AC010319.4	0.14223	0.716136	0.845619	NA	-0.412284	0.0971592	0.135896	0.773994
AC010319.5	0.243306	-0.916763	-0.784456	NA	6.87558	0.425048	-0.105544	-2.08247
AC010320.2	-0.0704409	1.06301	1.24354	NA	0.0985048	-0.054615	0.0439952	-0.621601
AC010320.3	-0.0442515	0.098612	0.457397	NA	-0.0958762	0.522161	0.343648	1.82282
AC010320.4	0.00299068	1.30628	1.00832	NA	-0.430882	0.362751	1.26774	1.71456
AC010326.3	-0.795339	-0.0684341	0.53808	NA	0.160992	0.311841	0.281035	0.196529
AC010327.5	-0.189785	0.659301	0.588753	NA	0.0906485	0.38085	0.497428	0.43457
AC010331.1	-0.343427	0.539409	0.375875	NA	0.646489	0.364616	-0.0973147	-0.0518854
AC010332.3	-0.0311516	0.453238	0.0826429	NA	-3.76907	-0.116153	-0.176401	0.0503737
AC010333.1	0.205473	1.65693	0.891881	NA	-0.0374681	-1.93014	0.00418909	0.522454
AC010333.2	-0.200363	1.2794	1.72156	NA	-0.392923	-1.59924	0.404659	1.093
AC010336.1	-0.0453149	0.602091	0.397352	NA	0.661913	0.164276	0.0819007	0.905742
AC010336.3	0.0633651	-0.0589773	-0.124121	NA	0.132153	-0.705147	-0.304556	0.352835
AC010336.8	-0.649709	0.288836	0.719307	NA	-0.997474	-0.189826	-0.206093	0.521893
AC010343.3	1.03256	0.764136	2.08981	NA	0.0726145	0.10342	0.225222	0.17391
AC010359.3	-0.382568	-0.330743	0.0252705	NA	-0.401355	-0.116771	-0.496891	0.0653587
AC010406.1	0.247546	0.238402	-0.332714	NA	-0.357516	1.06368	0.341225	0.0686493
AC010422.2	0.14379	0.397781	0.198395	NA	0.911178	0.816969	0.524445	0.190587
AC010457.1	-0.0655554	1.15107	1.19465	NA	0.799741	0.522315	1.37742	1.09377
AC010476.2	0.156967	0.0498165	-0.0768959	NA	1.84451	-0.514731	-0.139566	-0.403031
AC010478.1	-0.274067	0.154928	0.12086	NA	0.561385	0.267105	0.499147	0.28839
AC010491.1	-0.0886406	-1.08271	-0.890251	NA	-0.206143	0.738754	-0.345031	-0.758672
AC010491.2	-0.0393655	0.499319	1.26277	NA	-0.340159	0.612599	0.790227	1.47184
AC010504.1	-0.903767	-0.401683	-0.258509	NA	0.616798	-0.489792	-1.18006	0.518089
AC010531.3	-0.0425322	0.709025	1.40124	NA	0.422536	0.29324	0.6615	0.290951
AC010531.5	-0.0243523	0.698147	0.698766	NA	-0.415971	-0.572861	0.179914	0.696663
AC010531.6	0.338464	-0.169894	-0.501629	NA	1.43692	0.43738	-0.34794	0.18243
AC010538.1	-0.503499	0.385075	1.05926	NA	-1.25227	0.110394	0.0800711	0.530315
AC010542.2	-0.0602211	1.13647	2.51058	NA	-0.242075	-0.902167	-0.375787	-0.0899971
AC010542.4	0.495392	0.994783	0.167599	NA	1.24209	-0.684609	0.0989464	0.409347
AC010542.5	0.324262	0.413631	0.159168	NA	0.466171	-0.0282943	0.0836012	-0.367267
AC010547.1	0.251272	0.3683	-0.120831	NA	-0.371958	0.569598	0.00567009	0.171671
AC010547.3	-0.168582	1.54766	2.00109	NA	-0.104346	0.328131	1.10297	1.58381
AC010615.2	0.608593	0.893443	0.0861504	NA	0.948407	-1.27833	-0.0351507	0.0715108
AC010618.3	-0.404571	0.866065	1.47026	NA	0.00327332	0.109823	0.658689	2.47641
AC010623.1	-0.236157	0.377642	0.264521	NA	-0.00882124	-0.950263	-1.42967	0.263373
AC010624.1	0.075965	-1.19545	-0.824956	NA	0.67855	0.989389	0.784957	0.0482963
AC010624.3	0.659798	0.626637	1.13261	NA	-1.226	0.0373001	-0.281465	0.47404
AC010624.5	-0.00139513	0.641285	0.00798914	NA	-0.958593	0.52854	-0.0142676	-3.00895
AC010632.1	-0.268424	0.512678	0.877032	NA	-0.110674	-1.36258	-3.11453	0.101354
AC010632.2	-0.040275	0.207109	0.15518	NA	-0.393926	-0.083745	-0.196223	0.388431
AC010642.2	-0.779046	-0.669987	0.173684	NA	-0.19752	-0.0756979	-1.90409	-0.16928
AC010643.1	-0.368774	0.379727	-0.0859869	NA	-1.22801	-0.350158	-0.0957534	-1.25319
AC010654.1	-0.409352	0.231905	0.215448	NA	-1.20242	0.151192	0.258992	-0.192543
AC010680.1	-0.0608855	-0.130035	-0.542221	NA	-1.01397	0.156257	0.0364721	0.00447611
AC010680.3	-0.0640531	0.0604406	0.380569	NA	-0.746034	-0.339836	-0.125977	-0.0181812
AC010754.1	0.0131574	1.69047	0.685596	NA	-1.66327	1.37075	0.588022	-0.200431
AC010761.3	-0.000563709	2.24151	1.61425	NA	-1.27618	0.136884	2.87257	0.684627
AC010789.2	-0.963282	-0.280947	0.55285	NA	0.401337	-0.0195047	-0.113126	0.947037
AC010809.1	0.0818096	0.274863	2.00719	NA	-0.0401824	0.48105	0.397709	0.797303
AC010809.2	-0.583296	0.321621	0.452244	NA	-0.0725053	0.168696	-0.113305	1.38568
AC010864.1	-0.185265	0.326326	0.345381	NA	0.75403	-0.103812	-0.4774	-0.18974
AC010884.1	-0.619255	0.148092	1.11376	NA	0.176944	0.753795	-0.0126204	-0.041433
AC010889.1	-0.00639729	0.139102	0.122709	NA	-0.86059	-0.236475	0.10655	-0.13769
AC010889.2	0.00602036	0.354744	0.131553	NA	-0.072807	-0.113551	0.198199	0.139048
AC010894.3	-0.0349715	1.09479	0.902434	NA	-0.799583	-0.410992	0.0335875	0.632569
AC010904.2	0.987094	-0.600652	-2.46985	NA	0.726546	0.177301	0.869838	0.163406
AC010913.1	0.423972	-0.0963202	-1.38001	NA	1.15076	0.485	0.0899642	0.105725
AC010967.1	-0.236392	0.498885	0.404258	NA	0.910135	1.97212	2.14746	0.0471388
AC010969.2	-0.335195	0.865083	0.943313	NA	3.41476	-0.187052	-0.988923	0.018818
AC010973.1	-0.67375	-0.0888786	0.577067	NA	-1.09492	0.0790362	-0.175215	0.438496
AC010974.2	-0.053776	1.15496	0.943596	NA	0.0725611	0.778815	0.427251	1.09421
AC010976.1	-0.00560548	1.15717	0.734089	NA	0.238183	-1.37403	-0.268472	0.583753
AC010978.1	0.28321	0.243272	0.285678	NA	-0.209625	0.385228	0.427361	5.07363
AC010996.1	0.460658	0.571988	0.349011	NA	-0.0528394	0.770785	-0.165193	-0.997811
AC010997.3	-0.492188	0.0694825	-0.0823991	NA	-0.186731	-0.369426	-0.226593	0.611903
AC010997.5	0.217981	0.762293	0.0302538	NA	0.778434	-0.630792	-0.779735	0.0331184
AC010998.2	-0.392835	0.292287	0.898663	NA	-0.186858	0.459011	1.77061	0.721021
AC011029.1	0.074417	0.345117	4.3452	NA	0.308701	1.82445	0.994351	-0.318841
AC011043.1	-0.0213258	0.312291	0.163895	NA	-2.43575	-0.185691	-0.125725	0.571916
AC011092.2	0.0194576	1.10345	0.732689	NA	1.25103	-0.00328036	0.289439	0.886727
AC011092.3	0.3421	0.757999	0.534421	NA	-0.00409743	0.087516	0.390368	0.489288
AC011131.1	-0.116357	0.893306	0.923779	NA	1.49982	-0.173007	0.446922	-0.137268
AC011239.1	1.30269	0.482148	0.0476983	NA	0.197505	-1.43224	-0.557038	1.68689
AC011246.1	-0.27075	-0.350703	-0.621024	NA	-0.268768	0.222248	1.03631	1.05547
AC011287.1	-1.97698	-2.46161	-0.954368	NA	0.183622	-0.168509	0.231952	0.00859261
AC011290.1	-0.0696447	-0.0839005	0.546624	NA	0.986003	0.0661921	-0.209008	-0.0748263
AC011330.2	0.55234	0.184578	-0.0511763	NA	-0.210409	0.0361114	-0.0993249	-5.5475
AC011346.1	-2.63383	0.0310362	0.625982	NA	0.0561027	-0.0778398	-0.379901	-2.24706
AC011369.1	0.469354	1.43102	0.202975	NA	-0.201255	-0.247314	0.0450097	0.876542
AC011379.1	-0.231531	0.496687	2.62758	NA	-1.01887	0.314373	0.370768	0.295024
AC011379.2	-0.200029	1.56678	0.711642	NA	-0.0649501	0.039018	3.25076	0.913803
AC011405.1	0.240067	0.952559	1.00141	NA	-1.08647	0.462771	0.845855	2.10163
AC011416.4	-0.109484	-0.632006	-1.61334	NA	-0.287827	-0.0246905	0.254872	0.374859
AC011442.1	0.265228	1.34998	1.06495	NA	-2.55215	0.211547	0.790254	0.636595
AC011443.1	-0.2045	0.370532	0.322464	NA	-0.625394	-0.0799171	0.302468	0.164915
AC011444.1	0.60614	0.015723	-0.800374	NA	1.53953	0.165542	-0.0919969	-0.0590918
AC011447.3	-1.28793	-0.228899	0.575071	NA	-0.0534829	-0.21248	-0.0482109	0.712961
AC011450.1	0.130151	0.183978	0.491702	NA	0.306133	-1.40259	-0.775413	0.50249
AC011451.3	-0.135004	0.863989	1.00365	NA	0.200552	-0.439241	-0.373758	0.611778
AC011455.6	-0.107059	1.03827	1.8764	NA	-1.29613	0.0199888	0.344313	0.523787
AC011462.4	0.141998	-0.670036	-0.701967	NA	-0.36338	1.15326	1.30325	0.890506
AC011462.5	0.0890177	0.239956	0.115354	NA	0.551769	-0.901685	-0.688449	-1.58813
AC011466.1	0.0353256	0.146358	-0.635303	NA	-0.242341	-0.180367	0.0405901	0.53296
AC011466.3	-0.0653272	2.78054	1.52788	NA	-1.11238	-0.29703	0.218381	0.0982028
AC011468.1	-0.0950804	0.144068	0.66082	NA	0.0282553	0.0487606	-0.704972	-0.239148
AC011468.5	1.03278	-0.0444848	-0.519818	NA	0.435857	0.228881	-0.412041	-1.0484
AC011471.2	0.0680352	3.0173	1.77073	NA	-0.632687	-1.21506	-0.426851	-0.428129
AC011472.1	-0.210727	1.21428	1.03771	NA	-1.37835	-1.29818	0.683256	0.742943
AC011472.4	-0.052344	-0.718643	-0.709836	NA	-0.435048	1.21006	1.11655	-4.85853
AC011476.3	-0.862139	1.26759	0.638626	NA	0.214431	-0.00676105	0.494608	1.16005
AC011477.2	-0.112468	0.511353	-0.0145648	NA	1.7234	-0.627057	-1.30054	0.118323
AC011477.9	-0.0667463	0.766278	0.508911	NA	-0.485175	0.494519	0.0590145	0.194384
AC011478.1	-0.0949878	0.548015	0.124239	NA	-0.0862968	-0.799998	-2.19682	0.979659
AC011481.1	0.109844	1.45248	1.14963	NA	1.55801	-0.0693701	-0.482894	0.646455
AC011498.1	0.861106	0.222438	0.0398207	NA	-1.67911	-0.0704831	0.0865178	-0.113406
AC011503.1	-0.73997	0.1108	1.14683	NA	-0.0706276	0.123257	0.350931	1.04164
AC011511.2	-0.455306	0.650679	1.44112	NA	-0.498847	0.0264909	0.0740972	0.265826
AC011586.1	0.038697	1.49123	1.26418	NA	-0.657766	1.42832	0.880348	1.02841
AC011586.2	-0.19872	0.0932744	0.448524	NA	-0.369986	1.90208	1.2162	0.285491
AC011603.2	-0.270628	2.45857	0.996709	NA	-0.268125	0.147319	1.53964	1.10779
AC011625.1	-0.0319908	0.294342	-0.00658109	NA	0.180214	1.94954	0.539871	0.48725
AC011632.1	-0.260515	2.21528	2.01795	NA	-1.0816	-1.91045	-1.69627	0.406519
AC011676.2	-0.303089	0.610483	1.02197	NA	-0.556718	-1.05709	-0.135212	0.0250968
AC011676.3	-0.305887	0.243383	0.360668	NA	-0.0437201	-0.889775	0.0178879	0.852756
AC011773.3	0.204327	0.104933	-0.211732	NA	-0.870398	0.194065	0.179457	0.425456
AC011815.1	-0.379683	0.204626	0.126747	NA	1.52749	-0.175629	-0.54294	0.160066
AC011815.2	-0.120746	0.0840527	-0.445086	NA	-0.183467	1.17134	0.279531	-0.849
AC011824.1	-0.0229365	0.379888	0.495147	NA	-1.93435	-1.4177	-0.0566384	0.71522
AC011824.2	-0.415532	0.567824	0.528475	NA	-0.819953	-1.09333	-0.306142	0.374617
AC011824.4	-0.213342	0.866908	0.606082	NA	-0.715784	-2.60241	-0.362596	0.64373
AC011825.2	-0.138485	1.43373	2.21619	NA	0.0913968	-0.719129	-0.273724	1.22339
AC011921.1	-0.309023	-3.46292	-0.940609	NA	0.239096	0.230402	-0.280264	-0.545377
AC011933.4	0.494717	0.63732	0.555961	NA	-0.200795	1.38817	2.1415	0.722227
AC011939.2	0.084286	0.725743	0.814959	NA	-0.17382	-0.0840198	-0.166101	-1.3076
AC011997.1	-1.40292	-0.177195	0.286023	NA	0.35044	-0.503835	-0.70425	-0.259932
AC012020.1	-0.216202	0.0954423	0.129105	NA	1.64368	-0.759091	-0.434329	-0.493309
AC012063.1	0.0506359	-0.381092	-0.577096	NA	0.758758	-0.21909	-1.43699	-0.426178
AC012074.1	-0.854243	-0.544739	-0.207577	NA	0.035217	0.0986233	-0.155702	0.184911
AC012076.1	-0.107701	-0.00392576	0.45586	NA	0.140567	-1.4401	-0.269107	0.164203
AC012085.2	-0.000716246	1.03448	0.763143	NA	-0.942138	0.160171	0.116998	0.548583
AC012146.1	0.921098	-0.109053	-1.06909	NA	0.437686	0.421859	-0.421245	0.0241143
AC012170.3	0.0580299	0.155545	0.435676	NA	0.266151	-0.100095	0.161146	0.456267
AC012178.1	-0.276642	0.173227	0.476467	NA	0.415498	-0.109237	0.0118902	-0.0447793
AC012184.1	-0.313091	0.854297	0.275831	NA	-1.01135	0.0688244	0.168094	0.362121
AC012184.3	-0.11966	0.733506	0.780706	NA	-1.41178	-0.981813	-0.0573128	1.09825
AC012184.4	0.0577439	1.71088	0.68144	NA	-0.779302	-0.515324	0.672124	0.639551
AC012213.1	-0.599181	-0.348181	-0.501267	NA	1.80553	-0.0505688	-1.39254	0.321314
AC012213.4	0.678956	0.654593	0.437922	NA	0.062795	0.183941	-0.721166	-0.0431907
AC012254.1	0.397997	1.56299	0.8227	NA	-0.73245	0.185682	1.66555	0.582868
AC012291.3	-0.524623	-0.384489	0.888788	NA	0.210418	0.363189	1.25588	1.66322
AC012306.2	-0.0306329	0.231543	0.663296	NA	-0.35635	1.16869	0.900717	-0.00503294
AC012306.3	-0.0683519	-0.737712	-1.26589	NA	-0.336326	-0.0859662	-0.566015	-0.128636
AC012313.1	-0.447863	0.376378	0.101421	NA	-1.08013	-0.232502	-0.332038	0.0571912
AC012313.6	0.0316824	0.802438	0.544215	NA	-5.68662	0.783106	1.45151	0.0294205
AC012313.8	-0.529906	-0.307011	0.273192	NA	0.249614	0.156048	-0.593579	-0.274435
AC012358.3	-0.122364	1.06221	0.942842	NA	-0.308275	-0.164296	0.156923	1.10051
AC012360.1	0.648807	2.21587	1.21554	NA	-0.199605	-0.265646	0.217921	0.12434
AC012360.3	-0.145481	1.40923	1.12347	NA	-0.141306	-0.792807	-0.44963	-1.68086
AC012363.1	-0.0177469	0.0521974	-0.691539	NA	-0.515623	-0.893414	-0.930795	-3.08575
AC012368.1	-0.171814	-0.288883	-1.03768	NA	-0.224865	-0.0362053	0.34455	-0.128846
AC012370.2	0.0782438	2.38886	0.706981	NA	-2.40262	1.87915	1.39292	0.14092
AC012404.1	0.115639	0.900975	0.729916	NA	-0.315296	-0.0668223	-0.418429	0.417481
AC012404.2	-0.174212	0.137674	0.40268	NA	0.627988	-0.611097	-0.76378	0.483383
AC012414.5	-0.631052	-1.43611	0.661033	NA	0.243068	-0.648703	-0.255211	-0.198398
AC012442.2	-0.259029	1.41805	0.468684	NA	0.0711273	0.187308	-0.438275	-0.322582
AC012447.1	-0.392134	-0.328689	-0.141601	NA	0.260341	0.371163	0.341852	1.05661
AC012464.1	-0.107033	1.21336	1.05336	NA	-0.782385	-1.22216	-0.142003	0.984224
AC012467.2	-0.0619653	0.207051	1.12078	NA	-1.28842	0.3054	-0.309337	-0.571761
AC012485.1	-0.302665	0.909603	0.896088	NA	0.382484	-0.406804	-0.749532	-0.040507
AC012494.1	0.0412053	2.17279	-0.00107799	NA	0.0389509	0.0302312	-0.194026	-0.371414
AC012501.2	0.668452	0.605199	0.0491819	NA	-0.24758	0.392305	0.422228	1.43098
AC012511.2	0.440875	0.118252	0.250386	NA	0.972975	-0.783547	-2.6101	-0.0632169
AC012557.2	-0.597639	-0.020018	0.567073	NA	-0.389527	-0.0520375	-0.684454	0.00181884
AC012613.1	-0.305442	-0.0706487	-0.233868	NA	-0.714799	0.286263	0.383503	-0.107242
AC012615.1	0.0286503	-0.401726	-0.394779	NA	-0.299254	-0.222712	-0.720996	-0.393398
AC012629.2	0.0716512	-0.403553	-0.327163	NA	0.317108	-0.0731644	-0.954586	-0.142542
AC012636.1	-0.00321816	0.970881	0.707366	NA	0.344419	-0.270496	0.54535	1.01251
AC012640.1	-1.57064	0.528091	2.03185	NA	-0.0135675	1.30673	-0.000135701	-0.731273
AC012645.1	0.148566	1.10288	0.654471	NA	-0.598643	-0.154838	-0.0558383	0.123215
AC012668.3	-0.0507344	0.0587037	0.590016	NA	-2.76679	-0.653018	-0.590147	0.837885
AC013267.2	0.033311	0.378417	0.212603	NA	1.03572	-0.392294	0.0413835	0.823587
AC013287.1	-0.34787	-0.238579	-0.761077	NA	-0.313959	0.292125	-0.0975036	-0.641727
AC013391.2	-0.701504	-0.0176792	0.0459292	NA	3.66496	-0.660493	0.0146487	0.949298
AC013400.1	-0.350339	0.326137	0.0438118	NA	-0.183054	0.556391	0.272067	-0.119079
AC013437.1	-0.155142	-0.0959642	0.000397734	NA	-0.465927	-2.36653	-1.6922	-4.33662
AC013460.1	-0.0908186	0.0672238	-0.0344013	NA	0.20888	-0.344456	1.66703	-0.69413
AC013468.1	-0.154731	0.863854	0.887774	NA	0.312759	0.111519	-0.239172	0.0295042
AC013470.2	0.0811851	-1.47008	-1.05452	NA	-1.79125	0.033024	0.578579	0.962653
AC013472.1	0.392109	1.12513	0.918022	NA	0.180533	-0.0192978	0.273085	0.554065
AC013472.2	0.222532	1.98317	1.6171	NA	0.23887	-1.03221	-0.185651	0.558033
AC013553.4	-0.0414206	0.887891	1.18497	NA	-2.58846	0.704941	0.0881206	-0.781467
AC013562.1	-0.119855	0.0290841	0.0387559	NA	0.100737	0.222263	0.456687	-0.769083
AC013640.1	-0.0311352	1.25141	0.826363	NA	-0.160502	0.178711	-0.152711	2.04477
AC013643.2	-0.164623	0.323137	0.330531	NA	-1.21941	-0.1924	0.174585	0.224549
AC013652.1	-1.37638	0.205355	0.635406	NA	-0.780137	-1.09661	-1.00256	0.594579
AC013731.1	-0.142212	-1.00815	-0.526917	NA	-0.33064	0.635805	0.150492	0.624127
AC013733.1	0.0599719	1.68776	2.21816	NA	-0.234188	0.198339	0.998759	2.73546
AC013733.2	-0.187737	0.507878	0.760812	NA	-1.64128	-0.231678	-0.252023	0.768722
AC015712.1	-0.0472327	-0.00575891	0.368393	NA	-0.585095	0.104278	0.0188626	-0.337478
AC015726.1	-0.019759	0.388932	-0.219863	NA	-0.319584	0.126626	0.210382	-0.134017
AC015795.1	0.0988454	1.1358	1.76581	NA	-0.754356	-0.121285	0.46933	0.794964
AC015802.3	0.0468957	-1.74962	-0.766748	NA	0.56956	1.69712	-0.0275567	0.03666
AC015802.4	0.841275	0.30157	-0.43802	NA	2.42194	-0.989391	-0.916024	-0.255005
AC015802.5	-0.705951	-5.05278	-1.40238	NA	0.0805038	1.60885	0.148934	-0.591057
AC015802.6	-0.378639	0.379668	0.37111	NA	0.897651	0.031133	-0.00724728	0.0800317
AC015813.1	-0.360757	-2.13065	-0.739537	NA	0.721712	0.631095	2.08895	0.0572956
AC015813.4	-0.0155679	-1.16127	-2.49058	NA	-0.0352397	0.0907986	-0.35073	0.620647
AC015845.1	-0.00728081	0.90046	0.704419	NA	-1.42822	0.0173648	0.225943	1.49065
AC015845.2	-2.19219	-1.89282	-1.05946	NA	0.185231	-0.168517	-0.183092	1.05077
AC015849.1	-0.554355	-0.265853	0.153198	NA	0.128817	-0.829097	-0.255199	0.0773509
AC015849.3	-0.0349172	1.1581	0.874459	NA	0.0792418	-0.605028	0.0803902	0.10177
AC015849.4	0.303887	0.559572	0.609135	NA	0.841052	-0.184514	0.449061	0.642366
AC015853.2	0.400851	0.68008	2.06288	NA	0.0459667	3.69272	2.02792	2.51445
AC015853.3	0.0146095	1.15953	0.700632	NA	0.104821	0.598558	2.15436	0.631611
AC015871.1	-0.915485	-0.52404	0.382179	NA	-0.146158	-0.136928	-0.725476	0.595166
AC015871.4	-0.202608	-0.992523	-0.0956517	NA	-0.783375	-0.226722	-0.481964	-0.00704661
AC015871.7	-0.207696	0.616893	0.906945	NA	0.252805	-0.0768858	-0.48861	0.65642
AC015908.2	-1.19595	-0.0148493	0.656027	NA	-0.251711	-0.98085	0.278944	-0.0126528
AC015908.3	-0.0484226	2.19836	1.36851	NA	-1.27866	-0.293199	0.697215	1.58534
AC015912.3	-0.191175	-0.162506	0.138523	NA	0.967665	0.532787	0.258775	0.53168
AC015921.1	-2.85422	-0.628145	-0.253054	NA	0.61972	-1.86093	-0.379224	0.408721
AC015922.3	1.48173	-0.271329	-1.03081	NA	0.706043	0.766722	-0.482272	0.208483
AC015923.1	0.0511563	0.965088	0.594603	NA	-0.35446	0.844965	0.647741	0.329431
[truncated: 17,140 more rows]

## Sheet: HC age sign  -log10P
	X20	X30	X40	X50	X60	X70	X80	X90
[truncated: 18,003 more rows]

[truncated: 3 more sheets: MG age sign  -log10P, RGC age sign  -log10P, Rod age sign  -log10P]
