# Supplementary material for: Integrated multi-omics single cell atlas of the human retina
Source: Research Square preprint supplement (doi:10.21203/rs.3.rs-3471275/v1), 2023-11-16
Supplement: Supplementary file 10 [file 70b87909562a043db257c72c.xlsx]

## Sheet: Peak number per cell class
Table S12: Open chromatin regions identified in retinal major cell classes using snATAC-seq and MPRA results
Cell type	Number of peaks
AC	226351
Astrocyte	138012
BC	214519
Cone	192048
HC	181827
MG	183051
Microglia	70909
RGC	237748
Rod	168873
Union Peak	670736

## Sheet: Union peakSet
The genomic coordinates of the union peaks across major cell classes
Chromosome	Start	End
chr1	794321	794821
chr1	794824	795324
chr1	817073	817573
chr1	817867	818367
chr1	818795	819295
chr1	821185	821685
chr1	822323	822823
chr1	827250	827750
chr1	830675	831175
chr1	832004	832504
chr1	835431	835931
chr1	848545	849045
chr1	851329	851829
chr1	869639	870139
chr1	895522	896022
chr1	902688	903188
chr1	903678	904178
chr1	904526	905026
chr1	905204	905704
chr1	905797	906297
chr1	906736	907236
chr1	907259	907759
chr1	907968	908468
chr1	909950	910450
chr1	910531	911031
chr1	911125	911625
chr1	912043	912543
chr1	912796	913296
chr1	914193	914693
chr1	916642	917142
chr1	917682	918182
chr1	918518	919018
chr1	919308	919808
chr1	920282	920782
chr1	920970	921470
chr1	921489	921989
chr1	922237	922737
chr1	923029	923529
chr1	923599	924099
chr1	924211	924711
chr1	924777	925277
chr1	925462	925962
chr1	926017	926517
chr1	927015	927515
chr1	927673	928173
chr1	928266	928766
chr1	928777	929277
chr1	929778	930278
chr1	930434	930934
chr1	931513	932013
chr1	932402	932902
chr1	933343	933843
chr1	934985	935485
chr1	935721	936221
chr1	936585	937085
chr1	937573	938073
chr1	938673	939173
chr1	939576	940076
chr1	940079	940579
chr1	940764	941264
chr1	941549	942049
chr1	942310	942810
chr1	943163	943663
chr1	943924	944424
chr1	944636	945136
chr1	945233	945733
chr1	945995	946495
chr1	947219	947719
chr1	947845	948345
chr1	949824	950324
chr1	951300	951800
chr1	957100	957600
chr1	957811	958311
chr1	958564	959064
chr1	959114	959614
chr1	959745	960245
chr1	960311	960811
chr1	961294	961794
chr1	961985	962485
chr1	962537	963037
chr1	963072	963572
chr1	966202	966702
chr1	966747	967247
chr1	967802	968302
chr1	968340	968840
chr1	969415	969915
chr1	970251	970751
chr1	970781	971281
chr1	971476	971976
chr1	972076	972576
chr1	972984	973484
chr1	973812	974312
chr1	975272	975772
chr1	975975	976475
chr1	978289	978789
chr1	978798	979298
chr1	979447	979947
chr1	979984	980484
chr1	980575	981075
chr1	981285	981785
chr1	981918	982418
chr1	982775	983275
chr1	983301	983801
chr1	984077	984577
chr1	985130	985630
chr1	988244	988744
chr1	989570	990070
chr1	990297	990797
chr1	991035	991535
chr1	991712	992212
chr1	992505	993005
chr1	993056	993556
chr1	993666	994166
chr1	994666	995166
chr1	995456	995956
chr1	996060	996560
chr1	997144	997644
chr1	997686	998186
chr1	998521	999021
chr1	999304	999804
chr1	999935	1000435
chr1	1000590	1001090
chr1	1001187	1001687
chr1	1001721	1002221
chr1	1002429	1002929
chr1	1003299	1003799
chr1	1004034	1004534
chr1	1004552	1005052
chr1	1005114	1005614
chr1	1005691	1006191
chr1	1006459	1006959
chr1	1007170	1007670
chr1	1009428	1009928
chr1	1011324	1011824
chr1	1012595	1013095
chr1	1013220	1013720
chr1	1014001	1014501
chr1	1014847	1015347
chr1	1015361	1015861
chr1	1016005	1016505
chr1	1016907	1017407
chr1	1018291	1018791
chr1	1019245	1019745
chr1	1019935	1020435
chr1	1020439	1020939
chr1	1020977	1021477
chr1	1021489	1021989
chr1	1022193	1022693
chr1	1023070	1023570
chr1	1024055	1024555
chr1	1024941	1025441
chr1	1025451	1025951
chr1	1026412	1026912
chr1	1027141	1027641
chr1	1027936	1028436
chr1	1031019	1031519
chr1	1031785	1032285
chr1	1032379	1032879
chr1	1032885	1033385
chr1	1033523	1034023
chr1	1034360	1034860
chr1	1034905	1035405
chr1	1035631	1036131
chr1	1036904	1037404
chr1	1037747	1038247
chr1	1038712	1039212
chr1	1039307	1039807
chr1	1039931	1040431
chr1	1040608	1041108
chr1	1041249	1041749
chr1	1041802	1042302
chr1	1042836	1043336
chr1	1043696	1044196
chr1	1045341	1045841
chr1	1046330	1046830
chr1	1046982	1047482
chr1	1051539	1052039
chr1	1056310	1056810
chr1	1056911	1057411
chr1	1057511	1058011
chr1	1058523	1059023
chr1	1059420	1059920
chr1	1060290	1060790
chr1	1063735	1064235
chr1	1064427	1064927
chr1	1065248	1065748
chr1	1066777	1067277
chr1	1067678	1068178
chr1	1068528	1069028
chr1	1069151	1069651
chr1	1069864	1070364
chr1	1070462	1070962
chr1	1071022	1071522
chr1	1071705	1072205
chr1	1072656	1073156
chr1	1074498	1074998
chr1	1079319	1079819
chr1	1080056	1080556
chr1	1080916	1081416
chr1	1081522	1082022
chr1	1083304	1083804
chr1	1084879	1085379
chr1	1085461	1085961
chr1	1087272	1087772
chr1	1088282	1088782
chr1	1094882	1095382
chr1	1101425	1101925
chr1	1110355	1110855
chr1	1112662	1113162
chr1	1113594	1114094
chr1	1114216	1114716
chr1	1115191	1115691
chr1	1115930	1116430
chr1	1116766	1117266
chr1	1117272	1117772
chr1	1118294	1118794
chr1	1119216	1119716
chr1	1120196	1120696
chr1	1122029	1122529
chr1	1125994	1126494
chr1	1127095	1127595
chr1	1131776	1132276
chr1	1144174	1144674
chr1	1144938	1145438
chr1	1154039	1154539
chr1	1156751	1157251
chr1	1157258	1157758
chr1	1158108	1158608
chr1	1159072	1159572
chr1	1159950	1160450
chr1	1170944	1171444
chr1	1173489	1173989
chr1	1185163	1185663
chr1	1185705	1186205
chr1	1199405	1199905
chr1	1201231	1201731
chr1	1203816	1204316
chr1	1205687	1206187
chr1	1206315	1206815
chr1	1208365	1208865
chr1	1209160	1209660
chr1	1212578	1213078
chr1	1215900	1216400
chr1	1217650	1218150
chr1	1227864	1228364
chr1	1229540	1230040
chr1	1230197	1230697
chr1	1230756	1231256
chr1	1231257	1231757
chr1	1231830	1232330
chr1	1232700	1233200
chr1	1233203	1233703
chr1	1234315	1234815
chr1	1235301	1235801
chr1	1236129	1236629
chr1	1236889	1237389
chr1	1237438	1237938
chr1	1237975	1238475
chr1	1238626	1239126
chr1	1239741	1240241
chr1	1240662	1241162
chr1	1241299	1241799
chr1	1243430	1243930
chr1	1246561	1247061
chr1	1247393	1247893
chr1	1250134	1250634
chr1	1251105	1251605
chr1	1253634	1254134
chr1	1256820	1257320
chr1	1257398	1257898
chr1	1258602	1259102
chr1	1259856	1260356
chr1	1264908	1265408
chr1	1269772	1270272
chr1	1270810	1271310
chr1	1272196	1272696
chr1	1272984	1273484
chr1	1273652	1274152
chr1	1274422	1274922
chr1	1274924	1275424
chr1	1281653	1282153
chr1	1284216	1284716
chr1	1284954	1285454
chr1	1285484	1285984
chr1	1286413	1286913
chr1	1290107	1290607
chr1	1290855	1291355
chr1	1291764	1292264
chr1	1292588	1293088
chr1	1293332	1293832
chr1	1294396	1294896
chr1	1294901	1295401
chr1	1295622	1296122
chr1	1296308	1296808
chr1	1297908	1298408
chr1	1298818	1299318
chr1	1299416	1299916
chr1	1299941	1300441
chr1	1300824	1301324
chr1	1301887	1302387
chr1	1302409	1302909
chr1	1302997	1303497
chr1	1303788	1304288
chr1	1304679	1305179
chr1	1305499	1305999
chr1	1306006	1306506
chr1	1306591	1307091
chr1	1307234	1307734
chr1	1307790	1308290
chr1	1308360	1308860
chr1	1309065	1309565
chr1	1309692	1310192
chr1	1310225	1310725
chr1	1311018	1311518
chr1	1312169	1312669
chr1	1312687	1313187
chr1	1313516	1314016
chr1	1314096	1314596
chr1	1315025	1315525
chr1	1315627	1316127
chr1	1318235	1318735
chr1	1320306	1320806
chr1	1321577	1322077
chr1	1322542	1323042
chr1	1323391	1323891
chr1	1324513	1325013
chr1	1325047	1325547
chr1	1325950	1326450
chr1	1326530	1327030
chr1	1327174	1327674
chr1	1328071	1328571
chr1	1328705	1329205
chr1	1329249	1329749
chr1	1330207	1330707
chr1	1330972	1331472
chr1	1331524	1332024
chr1	1332422	1332922
chr1	1333334	1333834
chr1	1334188	1334688
chr1	1334732	1335232
chr1	1336334	1336834
chr1	1336870	1337370
chr1	1337670	1338170
chr1	1338521	1339021
chr1	1339535	1340035
chr1	1342883	1343383
chr1	1344542	1345042
chr1	1345219	1345719
chr1	1346080	1346580
chr1	1346841	1347341
chr1	1347847	1348347
chr1	1348719	1349219
chr1	1349286	1349786
chr1	1351348	1351848
chr1	1351961	1352461
chr1	1352853	1353353
chr1	1353450	1353950
chr1	1354423	1354923
chr1	1355344	1355844
chr1	1356009	1356509
chr1	1356980	1357480
chr1	1357779	1358279
chr1	1358381	1358881
chr1	1359250	1359750
chr1	1359819	1360319
chr1	1360444	1360944
chr1	1361133	1361633
chr1	1361951	1362451
chr1	1364226	1364726
chr1	1367727	1368227
chr1	1370697	1371197
chr1	1371264	1371764
chr1	1371977	1372477
chr1	1373184	1373684
chr1	1373883	1374383
chr1	1374443	1374943
chr1	1375171	1375671
chr1	1375745	1376245
chr1	1376317	1376817
chr1	1377187	1377687
chr1	1379770	1380270
chr1	1380369	1380869
chr1	1381354	1381854
chr1	1384148	1384648
chr1	1397752	1398252
chr1	1398647	1399147
chr1	1399197	1399697
chr1	1400152	1400652
chr1	1400685	1401185
chr1	1401341	1401841
chr1	1401904	1402404
chr1	1402495	1402995
chr1	1404227	1404727
chr1	1405141	1405641
chr1	1406224	1406724
chr1	1407071	1407571
chr1	1407670	1408170
chr1	1408521	1409021
chr1	1409271	1409771
chr1	1410600	1411100
chr1	1412110	1412610
chr1	1412701	1413201
chr1	1415671	1416171
chr1	1418028	1418528
chr1	1419339	1419839
chr1	1419929	1420429
chr1	1420555	1421055
chr1	1421104	1421604
chr1	1421993	1422493
chr1	1422532	1423032
chr1	1423598	1424098
chr1	1425816	1426316
chr1	1426800	1427300
chr1	1427610	1428110
chr1	1429604	1430104
chr1	1430136	1430636
chr1	1431449	1431949
chr1	1432089	1432589
chr1	1432600	1433100
chr1	1433194	1433694
chr1	1434228	1434728
chr1	1434744	1435244
chr1	1435401	1435901
chr1	1436174	1436674
chr1	1436744	1437244
chr1	1438496	1438996
chr1	1440817	1441317
chr1	1441870	1442370
chr1	1442506	1443006
chr1	1443747	1444247
chr1	1452943	1453443
chr1	1461808	1462308
chr1	1462461	1462961
chr1	1464147	1464647
chr1	1470942	1471442
chr1	1471470	1471970
chr1	1473056	1473556
chr1	1474056	1474556
chr1	1475319	1475819
chr1	1499393	1499893
chr1	1503367	1503867
chr1	1504207	1504707
chr1	1504831	1505331
chr1	1505431	1505931
chr1	1506153	1506653
chr1	1506670	1507170
chr1	1508686	1509186
chr1	1510309	1510809
chr1	1510908	1511408
chr1	1511829	1512329
chr1	1512346	1512846
chr1	1516961	1517461
chr1	1518102	1518602
chr1	1527297	1527797
chr1	1528919	1529419
chr1	1531158	1531658
chr1	1531965	1532465
chr1	1532573	1533073
chr1	1533132	1533632
chr1	1533836	1534336
chr1	1534696	1535196
chr1	1535422	1535922
chr1	1536029	1536529
chr1	1536728	1537228
chr1	1537528	1538028
chr1	1538341	1538841
chr1	1539050	1539550
chr1	1539551	1540051
chr1	1540374	1540874
chr1	1541085	1541585
chr1	1541940	1542440
chr1	1542445	1542945
chr1	1543009	1543509
chr1	1543591	1544091
chr1	1544483	1544983
chr1	1545711	1546211
chr1	1546277	1546777
chr1	1546879	1547379
chr1	1547407	1547907
chr1	1548317	1548817
chr1	1549293	1549793
chr1	1549917	1550417
chr1	1550884	1551384
chr1	1551601	1552101
chr1	1552377	1552877
chr1	1552881	1553381
chr1	1553703	1554203
chr1	1554802	1555302
chr1	1555664	1556164
chr1	1556969	1557469
chr1	1557752	1558252
chr1	1561575	1562075
chr1	1562156	1562656
chr1	1562704	1563204
chr1	1563210	1563710
chr1	1566491	1566991
chr1	1567041	1567541
chr1	1567683	1568183
chr1	1573092	1573592
chr1	1574120	1574620
chr1	1574639	1575139
chr1	1575471	1575971
chr1	1576049	1576549
chr1	1577388	1577888
chr1	1591405	1591905
chr1	1593045	1593545
chr1	1594511	1595011
chr1	1597307	1597807
chr1	1597909	1598409
chr1	1598577	1599077
chr1	1599169	1599669
chr1	1599906	1600406
chr1	1600802	1601302
chr1	1601816	1602316
chr1	1602395	1602895
chr1	1603072	1603572
chr1	1603777	1604277
chr1	1607063	1607563
chr1	1609675	1610175
chr1	1612275	1612775
chr1	1613268	1613768
chr1	1614098	1614598
chr1	1614641	1615141
chr1	1615144	1615644
chr1	1616013	1616513
chr1	1616679	1617179
chr1	1617584	1618084
chr1	1618334	1618834
chr1	1619380	1619880
chr1	1620081	1620581
chr1	1620660	1621160
chr1	1621587	1622087
chr1	1622203	1622703
chr1	1622715	1623215
chr1	1623470	1623970
chr1	1624518	1625018
chr1	1625051	1625551
chr1	1625668	1626168
chr1	1628229	1628729
chr1	1628841	1629341
chr1	1629580	1630080
chr1	1630160	1630660
chr1	1630883	1631383
chr1	1631803	1632303
chr1	1650434	1650934
chr1	1658901	1659401
chr1	1660700	1661200
chr1	1665632	1666132
chr1	1668869	1669369
chr1	1669987	1670487
chr1	1672232	1672732
chr1	1672752	1673252
chr1	1673517	1674017
chr1	1677384	1677884
chr1	1678310	1678810
chr1	1678823	1679323
chr1	1679409	1679909
chr1	1680241	1680741
chr1	1680853	1681353
chr1	1681482	1681982
chr1	1682197	1682697
chr1	1682774	1683274
chr1	1683495	1683995
chr1	1684016	1684516
chr1	1685289	1685789
chr1	1686060	1686560
chr1	1687455	1687955
chr1	1688856	1689356
chr1	1692564	1693064
chr1	1693163	1693663
chr1	1693877	1694377
chr1	1694460	1694960
chr1	1724173	1724673
chr1	1726065	1726565
chr1	1727213	1727713
chr1	1731353	1731853
chr1	1732554	1733054
chr1	1734703	1735203
chr1	1743050	1743550
chr1	1745552	1746052
chr1	1746191	1746691
chr1	1746985	1747485
chr1	1748752	1749252
chr1	1753296	1753796
chr1	1753876	1754376
chr1	1758866	1759366
chr1	1759415	1759915
chr1	1762767	1763267
chr1	1764163	1764663
chr1	1771673	1772173
chr1	1772475	1772975
chr1	1773570	1774070
chr1	1774329	1774829
chr1	1775295	1775795
chr1	1775810	1776310
chr1	1776621	1777121
chr1	1777451	1777951
chr1	1778189	1778689
chr1	1778711	1779211
chr1	1779598	1780098
chr1	1780214	1780714
chr1	1781035	1781535
chr1	1781882	1782382
chr1	1782390	1782890
chr1	1783308	1783808
chr1	1784369	1784869
chr1	1785363	1785863
chr1	1786119	1786619
chr1	1786921	1787421
chr1	1787566	1788066
chr1	1788094	1788594
chr1	1788957	1789457
chr1	1789679	1790179
chr1	1790395	1790895
chr1	1791440	1791940
chr1	1792347	1792847
chr1	1793180	1793680
chr1	1794168	1794668
chr1	1794963	1795463
chr1	1795481	1795981
chr1	1796440	1796940
chr1	1797694	1798194
chr1	1798450	1798950
chr1	1799598	1800098
chr1	1800857	1801357
chr1	1801971	1802471
chr1	1802477	1802977
chr1	1803107	1803607
chr1	1803978	1804478
chr1	1804613	1805113
chr1	1805186	1805686
chr1	1806009	1806509
chr1	1806679	1807179
chr1	1807630	1808130
chr1	1808269	1808769
chr1	1809428	1809928
chr1	1810169	1810669
chr1	1811363	1811863
chr1	1811992	1812492
chr1	1812733	1813233
chr1	1813704	1814204
chr1	1814418	1814918
chr1	1815079	1815579
chr1	1815808	1816308
chr1	1816866	1817366
chr1	1817856	1818356
chr1	1818775	1819275
chr1	1819395	1819895
chr1	1821017	1821517
chr1	1822028	1822528
chr1	1822909	1823409
chr1	1823736	1824236
chr1	1824406	1824906
chr1	1825203	1825703
chr1	1825912	1826412
chr1	1826680	1827180
chr1	1827308	1827808
chr1	1827841	1828341
chr1	1828578	1829078
chr1	1829277	1829777
chr1	1829789	1830289
chr1	1830752	1831252
chr1	1831265	1831765
chr1	1832118	1832618
chr1	1832795	1833295
chr1	1833337	1833837
chr1	1833919	1834419
chr1	1834688	1835188
chr1	1835558	1836058
chr1	1836460	1836960
chr1	1838270	1838770
chr1	1839528	1840028
chr1	1840298	1840798
chr1	1841070	1841570
chr1	1841704	1842204
chr1	1842464	1842964
chr1	1843202	1843702
chr1	1845829	1846329
chr1	1846883	1847383
chr1	1847421	1847921
chr1	1849178	1849678
chr1	1851927	1852427
chr1	1852901	1853401
chr1	1853551	1854051
chr1	1855377	1855877
chr1	1856279	1856779
chr1	1857249	1857749
chr1	1858520	1859020
chr1	1859104	1859604
chr1	1860307	1860807
chr1	1860841	1861341
chr1	1862749	1863249
chr1	1863608	1864108
chr1	1866772	1867272
chr1	1870131	1870631
chr1	1870731	1871231
chr1	1873144	1873644
chr1	1873911	1874411
chr1	1874798	1875298
chr1	1877789	1878289
chr1	1878942	1879442
chr1	1880318	1880818
chr1	1880880	1881380
chr1	1881585	1882085
chr1	1882312	1882812
chr1	1883379	1883879
chr1	1884025	1884525
chr1	1884910	1885410
chr1	1885747	1886247
chr1	1886927	1887427
chr1	1887568	1888068
chr1	1888326	1888826
chr1	1889323	1889823
chr1	1890222	1890722
chr1	1890879	1891379
chr1	1891494	1891994
chr1	1892028	1892528
chr1	1892642	1893142
chr1	1893853	1894353
chr1	1894754	1895254
chr1	1895425	1895925
chr1	1897106	1897606
chr1	1898826	1899326
chr1	1899329	1899829
chr1	1901429	1901929
chr1	1902077	1902577
chr1	1902766	1903266
chr1	1905388	1905888
chr1	1906146	1906646
chr1	1907134	1907634
chr1	1907835	1908335
chr1	1908378	1908878
chr1	1909020	1909520
chr1	1909858	1910358
chr1	1910437	1910937
chr1	1910954	1911454
chr1	1911786	1912286
chr1	1912719	1913219
chr1	1914102	1914602
chr1	1914913	1915413
chr1	1916180	1916680
chr1	1916970	1917470
chr1	1917489	1917989
chr1	1918156	1918656
chr1	1919137	1919637
chr1	1919757	1920257
chr1	1920388	1920888
chr1	1921314	1921814
chr1	1922399	1922899
chr1	1923444	1923944
chr1	1924425	1924925
chr1	1926614	1927114
chr1	1928657	1929157
chr1	1929319	1929819
chr1	1929941	1930441
chr1	1931440	1931940
chr1	1942298	1942798
chr1	1943313	1943813
chr1	1943894	1944394
chr1	1946456	1946956
chr1	1957498	1957998
chr1	1959914	1960414
chr1	1960533	1961033
chr1	1966314	1966814
chr1	1966938	1967438
chr1	1969063	1969563
chr1	1977672	1978172
chr1	1978497	1978997
chr1	1982475	1982975
chr1	1983054	1983554
chr1	1983996	1984496
chr1	1984625	1985125
chr1	1985603	1986103
chr1	1986532	1987032
chr1	1987172	1987672
chr1	1989065	1989565
chr1	1990213	1990713
chr1	1991965	1992465
chr1	1996120	1996620
chr1	2001797	2002297
chr1	2003595	2004095
chr1	2014629	2015129
chr1	2017713	2018213
chr1	2019085	2019585
chr1	2020338	2020838
chr1	2020964	2021464
chr1	2021473	2021973
chr1	2024698	2025198
chr1	2025570	2026070
chr1	2026147	2026647
chr1	2028794	2029294
chr1	2029540	2030040
chr1	2030380	2030880
chr1	2030911	2031411
chr1	2031613	2032113
chr1	2032125	2032625
chr1	2032653	2033153
chr1	2033163	2033663
chr1	2034856	2035356
chr1	2037299	2037799
chr1	2041600	2042100
chr1	2042654	2043154
chr1	2043546	2044046
chr1	2044244	2044744
chr1	2044765	2045265
chr1	2045351	2045851
chr1	2045886	2046386
chr1	2046400	2046900
chr1	2046923	2047423
chr1	2047485	2047985
chr1	2047999	2048499
chr1	2049352	2049852
chr1	2050051	2050551
chr1	2051169	2051669
chr1	2051995	2052495
chr1	2052535	2053035
chr1	2053340	2053840
chr1	2054177	2054677
chr1	2055350	2055850
chr1	2058586	2059086
chr1	2060135	2060635
chr1	2060786	2061286
chr1	2061485	2061985
chr1	2062018	2062518
chr1	2063087	2063587
chr1	2066995	2067495
chr1	2068190	2068690
chr1	2069842	2070342
chr1	2070786	2071286
chr1	2071449	2071949
chr1	2072312	2072812
chr1	2072848	2073348
chr1	2073395	2073895
chr1	2074011	2074511
chr1	2074880	2075380
chr1	2075698	2076198
chr1	2076513	2077013
chr1	2077112	2077612
chr1	2079817	2080317
chr1	2081268	2081768
chr1	2081994	2082494
chr1	2082650	2083150
chr1	2083359	2083859
chr1	2083878	2084378
chr1	2084792	2085292
chr1	2085739	2086239
chr1	2086635	2087135
chr1	2087192	2087692
chr1	2087739	2088239
chr1	2088435	2088935
chr1	2088983	2089483
chr1	2089762	2090262
chr1	2091582	2092082
chr1	2092662	2093162
chr1	2093180	2093680
chr1	2094013	2094513
chr1	2094925	2095425
chr1	2095480	2095980
chr1	2096302	2096802
chr1	2096836	2097336
chr1	2097484	2097984
chr1	2098240	2098740
chr1	2099118	2099618
chr1	2099824	2100324
chr1	2100681	2101181
chr1	2101911	2102411
chr1	2102749	2103249
chr1	2103364	2103864
chr1	2104162	2104662
chr1	2104696	2105196
chr1	2105695	2106195
chr1	2106536	2107036
chr1	2107184	2107684
chr1	2107909	2108409
chr1	2108542	2109042
chr1	2109473	2109973
chr1	2110922	2111422
chr1	2112328	2112828
chr1	2113687	2114187
chr1	2114819	2115319
chr1	2116012	2116512
chr1	2121670	2122170
chr1	2124776	2125276
chr1	2125916	2126416
chr1	2127264	2127764
chr1	2128080	2128580
chr1	2128651	2129151
chr1	2129153	2129653
chr1	2129794	2130294
chr1	2130734	2131234
chr1	2131418	2131918
chr1	2132151	2132651
chr1	2133041	2133541
chr1	2133631	2134131
chr1	2134285	2134785
chr1	2134852	2135352
chr1	2135444	2135944
chr1	2136282	2136782
chr1	2136992	2137492
chr1	2137704	2138204
chr1	2138383	2138883
chr1	2139331	2139831
chr1	2139844	2140344
chr1	2142761	2143261
chr1	2145223	2145723
chr1	2145734	2146234
chr1	2148332	2148832
chr1	2149883	2150383
chr1	2151346	2151846
chr1	2151850	2152350
chr1	2153069	2153569
chr1	2155017	2155517
chr1	2155735	2156235
chr1	2156726	2157226
chr1	2157465	2157965
chr1	2158162	2158662
chr1	2159174	2159674
chr1	2160094	2160594
chr1	2160818	2161318
chr1	2163160	2163660
chr1	2164191	2164691
chr1	2165632	2166132
chr1	2166196	2166696
chr1	2166941	2167441
chr1	2167468	2167968
chr1	2168519	2169019
chr1	2171027	2171527
chr1	2172932	2173432
chr1	2173453	2173953
chr1	2174223	2174723
chr1	2174944	2175444
chr1	2175978	2176478
chr1	2176616	2177116
chr1	2177846	2178346
chr1	2179314	2179814
chr1	2180244	2180744
chr1	2180772	2181272
chr1	2181747	2182247
chr1	2182331	2182831
chr1	2183314	2183814
chr1	2183855	2184355
chr1	2184633	2185133
chr1	2185255	2185755
chr1	2185816	2186316
chr1	2186432	2186932
chr1	2187109	2187609
chr1	2187807	2188307
chr1	2188353	2188853
chr1	2188893	2189393
chr1	2189477	2189977
chr1	2190001	2190501
chr1	2190592	2191092
chr1	2191747	2192247
chr1	2192530	2193030
chr1	2193184	2193684
chr1	2193782	2194282
chr1	2194289	2194789
chr1	2194836	2195336
chr1	2195527	2196027
chr1	2196224	2196724
chr1	2196912	2197412
chr1	2197720	2198220
chr1	2198438	2198938
chr1	2199193	2199693
chr1	2200250	2200750
chr1	2201267	2201767
chr1	2201947	2202447
chr1	2202646	2203146
chr1	2203213	2203713
chr1	2203741	2204241
chr1	2204259	2204759
chr1	2205053	2205553
chr1	2205738	2206238
chr1	2206255	2206755
chr1	2207018	2207518
chr1	2207565	2208065
chr1	2208507	2209007
chr1	2209495	2209995
chr1	2210060	2210560
chr1	2210796	2211296
chr1	2211666	2212166
chr1	2212329	2212829
chr1	2213266	2213766
chr1	2213995	2214495
chr1	2214831	2215331
chr1	2215601	2216101
chr1	2216299	2216799
chr1	2217638	2218138
chr1	2219994	2220494
chr1	2220608	2221108
chr1	2221432	2221932
chr1	2222365	2222865
chr1	2222890	2223390
chr1	2224155	2224655
chr1	2224682	2225182
chr1	2225491	2225991
chr1	2226375	2226875
chr1	2227005	2227505
chr1	2227581	2228081
chr1	2228183	2228683
chr1	2228989	2229489
chr1	2229825	2230325
chr1	2230577	2231077
chr1	2231163	2231663
chr1	2231817	2232317
chr1	2232393	2232893
chr1	2232975	2233475
chr1	2233485	2233985
chr1	2234349	2234849
chr1	2234990	2235490
chr1	2235830	2236330
chr1	2237047	2237547
chr1	2237973	2238473
chr1	2238784	2239284
chr1	2239523	2240023
chr1	2240113	2240613
chr1	2240820	2241320
chr1	2241738	2242238
chr1	2242678	2243178
chr1	2243275	2243775
chr1	2243792	2244292
chr1	2244303	2244803
chr1	2244824	2245324
chr1	2245526	2246026
chr1	2246041	2246541
chr1	2246615	2247115
chr1	2247963	2248463
chr1	2248787	2249287
chr1	2249482	2249982
chr1	2250280	2250780
chr1	2251131	2251631
chr1	2251671	2252171
chr1	2252423	2252923
chr1	2253281	2253781
chr1	2253856	2254356
chr1	2254483	2254983
chr1	2255239	2255739
chr1	2255903	2256403
chr1	2256661	2257161
chr1	2257257	2257757
chr1	2258308	2258808
chr1	2259626	2260126
chr1	2260992	2261492
chr1	2266559	2267059
chr1	2267331	2267831
chr1	2268553	2269053
chr1	2269145	2269645
chr1	2270138	2270638
chr1	2270661	2271161
chr1	2271268	2271768
chr1	2271900	2272400
chr1	2272595	2273095
chr1	2273581	2274081
chr1	2274395	2274895
chr1	2275844	2276344
chr1	2276751	2277251
chr1	2278093	2278593
chr1	2279163	2279663
chr1	2279846	2280346
chr1	2282852	2283352
chr1	2284142	2284642
chr1	2284862	2285362
chr1	2288522	2289022
chr1	2289130	2289630
chr1	2289663	2290163
chr1	2290604	2291104
chr1	2291408	2291908
chr1	2292096	2292596
chr1	2292626	2293126
chr1	2293203	2293703
chr1	2294002	2294502
chr1	2295334	2295834
chr1	2297270	2297770
chr1	2297955	2298455
chr1	2298616	2299116
chr1	2299206	2299706
chr1	2300315	2300815
chr1	2300955	2301455
chr1	2301517	2302017
chr1	2302459	2302959
chr1	2304004	2304504
chr1	2304865	2305365
chr1	2305671	2306171
chr1	2306273	2306773
chr1	2307045	2307545
chr1	2307999	2308499
chr1	2308786	2309286
chr1	2310285	2310785
chr1	2310860	2311360
chr1	2311390	2311890
chr1	2312189	2312689
chr1	2312802	2313302
chr1	2313602	2314102
chr1	2314217	2314717
chr1	2315029	2315529
chr1	2315604	2316104
chr1	2316298	2316798
chr1	2317437	2317937
chr1	2318342	2318842
chr1	2318895	2319395
chr1	2319682	2320182
chr1	2320628	2321128
chr1	2321299	2321799
chr1	2322148	2322648
chr1	2322921	2323421
chr1	2323782	2324282
chr1	2324606	2325106
chr1	2326409	2326909
chr1	2329906	2330406
chr1	2330436	2330936
chr1	2331084	2331584
chr1	2332797	2333297
chr1	2334498	2334998
chr1	2335925	2336425
chr1	2338423	2338923
chr1	2342289	2342789
chr1	2343023	2343523
chr1	2347368	2347868
chr1	2352497	2352997
chr1	2354181	2354681
chr1	2371669	2372169
chr1	2376381	2376881
chr1	2378273	2378773
chr1	2381037	2381537
chr1	2381652	2382152
chr1	2382529	2383029
chr1	2383073	2383573
chr1	2384309	2384809
chr1	2384858	2385358
chr1	2385693	2386193
chr1	2387978	2388478
chr1	2388558	2389058
chr1	2389177	2389677
chr1	2390055	2390555
chr1	2390917	2391417
chr1	2391426	2391926
chr1	2392153	2392653
chr1	2392785	2393285
chr1	2393368	2393868
chr1	2393961	2394461
chr1	2395166	2395666
chr1	2398804	2399304
chr1	2401895	2402395
chr1	2402457	2402957
chr1	2403826	2404326
chr1	2405044	2405544
chr1	2405878	2406378
chr1	2406493	2406993
chr1	2407271	2407771
chr1	2408308	2408808
chr1	2410228	2410728
chr1	2411344	2411844
chr1	2411915	2412415
chr1	2412420	2412920
chr1	2412947	2413447
chr1	2413751	2414251
chr1	2414308	2414808
chr1	2415086	2415586
chr1	2415601	2416101
chr1	2416728	2417228
chr1	2417868	2418368
chr1	2419930	2420430
chr1	2425925	2426425
chr1	2430982	2431482
chr1	2432364	2432864
chr1	2436552	2437052
chr1	2437908	2438408
chr1	2438671	2439171
chr1	2439185	2439685
chr1	2440057	2440557
chr1	2441144	2441644
chr1	2441719	2442219
chr1	2442669	2443169
chr1	2443225	2443725
chr1	2443794	2444294
chr1	2444438	2444938
chr1	2445506	2446006
chr1	2446282	2446782
chr1	2446913	2447413
chr1	2447725	2448225
chr1	2449635	2450135
chr1	2450583	2451083
chr1	2451129	2451629
chr1	2451685	2452185
chr1	2452585	2453085
chr1	2453685	2454185
chr1	2454597	2455097
chr1	2455417	2455917
chr1	2455944	2456444
chr1	2456711	2457211
chr1	2457642	2458142
chr1	2458153	2458653
chr1	2458772	2459272
chr1	2459726	2460226
chr1	2460422	2460922
chr1	2460973	2461473
chr1	2461746	2462246
chr1	2462770	2463270
chr1	2463330	2463830
chr1	2463896	2464396
chr1	2464412	2464912
chr1	2464942	2465442
chr1	2465507	2466007
chr1	2466301	2466801
chr1	2467167	2467667
chr1	2467726	2468226
chr1	2468458	2468958
chr1	2469204	2469704
chr1	2470090	2470590
chr1	2470759	2471259
chr1	2471395	2471895
chr1	2472036	2472536
chr1	2472729	2473229
chr1	2473318	2473818
chr1	2474342	2474842
chr1	2474949	2475449
chr1	2475975	2476475
chr1	2476898	2477398
chr1	2478018	2478518
chr1	2479017	2479517
chr1	2480109	2480609
chr1	2480926	2481426
chr1	2481939	2482439
chr1	2482601	2483101
chr1	2483163	2483663
chr1	2484112	2484612
chr1	2484667	2485167
chr1	2485663	2486163
chr1	2486467	2486967
chr1	2487329	2487829
chr1	2488092	2488592
chr1	2489118	2489618
chr1	2490342	2490842
chr1	2490865	2491365
chr1	2491406	2491906
chr1	2492460	2492960
chr1	2492990	2493490
chr1	2493492	2493992
chr1	2494479	2494979
chr1	2495225	2495725
chr1	2495728	2496228
chr1	2496729	2497229
chr1	2497334	2497834
chr1	2497869	2498369
chr1	2498584	2499084
chr1	2499267	2499767
chr1	2500005	2500505
chr1	2500686	2501186
chr1	2501571	2502071
chr1	2502251	2502751
chr1	2503051	2503551
chr1	2503581	2504081
chr1	2504123	2504623
chr1	2504708	2505208
chr1	2505506	2506006
chr1	2506251	2506751
chr1	2506871	2507371
chr1	2507523	2508023
chr1	2508205	2508705
chr1	2509010	2509510
chr1	2509959	2510459
chr1	2510732	2511232
chr1	2512667	2513167
chr1	2513346	2513846
chr1	2515447	2515947
chr1	2516141	2516641
chr1	2516648	2517148
chr1	2517518	2518018
chr1	2518275	2518775
chr1	2520270	2520770
chr1	2521225	2521725
chr1	2521985	2522485
chr1	2522520	2523020
chr1	2523060	2523560
chr1	2523607	2524107
chr1	2524384	2524884
chr1	2525432	2525932
chr1	2526034	2526534
chr1	2526664	2527164
chr1	2527228	2527728
chr1	2527976	2528476
chr1	2528617	2529117
chr1	2529245	2529745
chr1	2530074	2530574
chr1	2530665	2531165
chr1	2531685	2532185
chr1	2532716	2533216
chr1	2533337	2533837
chr1	2534325	2534825
chr1	2534916	2535416
chr1	2535452	2535952
chr1	2536093	2536593
chr1	2536931	2537431
chr1	2537588	2538088
chr1	2538436	2538936
chr1	2539254	2539754
chr1	2539831	2540331
chr1	2540463	2540963
chr1	2541002	2541502
chr1	2541700	2542200
chr1	2542464	2542964
chr1	2543396	2543896
chr1	2543963	2544463
chr1	2544782	2545282
chr1	2545338	2545838
chr1	2545854	2546354
chr1	2546813	2547313
chr1	2547336	2547836
chr1	2547949	2548449
chr1	2548605	2549105
chr1	2549201	2549701
chr1	2551653	2552153
chr1	2552191	2552691
chr1	2554131	2554631
chr1	2554815	2555315
chr1	2555446	2555946
chr1	2556131	2556631
chr1	2557297	2557797
chr1	2558332	2558832
chr1	2558933	2559433
chr1	2559548	2560048
chr1	2560163	2560663
chr1	2562945	2563445
chr1	2563880	2564380
chr1	2564857	2565357
chr1	2567043	2567543
chr1	2568948	2569448
chr1	2575816	2576316
chr1	2578138	2578638
chr1	2579113	2579613
chr1	2581615	2582115
chr1	2582300	2582800
chr1	2582942	2583442
chr1	2583759	2584259
chr1	2584745	2585245
chr1	2585345	2585845
chr1	2586344	2586844
chr1	2587104	2587604
chr1	2587734	2588234
chr1	2588485	2588985
chr1	2589500	2590000
chr1	2590233	2590733
chr1	2591585	2592085
chr1	2592839	2593339
chr1	2593418	2593918
chr1	2593943	2594443
chr1	2595144	2595644
chr1	2606081	2606581
chr1	2609476	2609976
chr1	2610306	2610806
chr1	2611224	2611724
chr1	2627671	2628171
chr1	2628428	2628928
chr1	2629237	2629737
chr1	2630219	2630719
chr1	2631002	2631502
chr1	2636561	2637061
chr1	2639098	2639598
chr1	2640121	2640621
chr1	2641263	2641763
chr1	2642205	2642705
chr1	2643034	2643534
chr1	2643652	2644152
chr1	2644679	2645179
chr1	2645894	2646394
chr1	2652163	2652663
chr1	2652664	2653164
chr1	2653233	2653733
chr1	2653888	2654388
chr1	2654553	2655053
chr1	2655688	2656188
chr1	2683883	2684383
chr1	2687952	2688452
chr1	2778036	2778536
chr1	2786544	2787044
chr1	2787522	2788022
chr1	2788107	2788607
chr1	2788801	2789301
chr1	2789361	2789861
chr1	2802617	2803117
chr1	2803848	2804348
chr1	2805789	2806289
chr1	2816236	2816736
chr1	2819864	2820364
chr1	2821863	2822363
chr1	2833387	2833887
chr1	2855674	2856174
chr1	2862215	2862715
chr1	2874669	2875169
chr1	2875908	2876408
chr1	2876988	2877488
chr1	2877933	2878433
chr1	2878574	2879074
chr1	2881257	2881757
chr1	2881824	2882324
chr1	2882371	2882871
chr1	2882908	2883408
chr1	2883621	2884121
chr1	2884637	2885137
chr1	2886177	2886677
chr1	2887517	2888017
chr1	2889688	2890188
chr1	2890319	2890819
chr1	2892106	2892606
chr1	2894284	2894784
chr1	2905499	2905999
chr1	2906001	2906501
chr1	2908229	2908729
chr1	2909764	2910264
chr1	2910364	2910864
chr1	2911208	2911708
chr1	2911763	2912263
chr1	2912846	2913346
chr1	2913472	2913972
chr1	2914658	2915158
chr1	2915187	2915687
chr1	2915967	2916467
chr1	2918469	2918969
chr1	2921962	2922462
chr1	2922973	2923473
chr1	2928570	2929070
chr1	2966888	2967388
chr1	2968508	2969008
chr1	2970054	2970554
chr1	2970893	2971393
chr1	2971418	2971918
chr1	2980137	2980637
chr1	2985235	2985735
chr1	2987104	2987604
chr1	2987794	2988294
chr1	3012409	3012909
chr1	3028736	3029236
chr1	3030958	3031458
chr1	3031714	3032214
chr1	3032421	3032921
chr1	3035546	3036046
chr1	3060116	3060616
chr1	3060885	3061385
chr1	3062752	3063252
chr1	3063897	3064397
chr1	3066136	3066636
chr1	3067989	3068489
chr1	3068711	3069211
chr1	3069531	3070031
chr1	3070125	3070625
chr1	3071036	3071536
chr1	3071615	3072115
chr1	3072680	3073180
chr1	3073325	3073825
chr1	3074827	3075327
chr1	3078713	3079213
chr1	3094493	3094993
chr1	3100532	3101032
chr1	3101076	3101576
chr1	3102848	3103348
chr1	3104202	3104702
chr1	3104730	3105230
chr1	3105380	3105880
chr1	3106026	3106526
chr1	3106622	3107122
chr1	3107132	3107632
chr1	3107906	3108406
chr1	3109315	3109815
chr1	3115265	3115765
chr1	3121721	3122221
chr1	3122323	3122823
chr1	3124964	3125464
chr1	3125631	3126131
chr1	3126297	3126797
chr1	3127058	3127558
chr1	3127756	3128256
chr1	3128520	3129020
chr1	3132061	3132561
chr1	3133831	3134331
chr1	3134674	3135174
chr1	3135455	3135955
chr1	3139756	3140256
chr1	3142502	3143002
chr1	3146008	3146508
chr1	3151452	3151952
chr1	3156357	3156857
chr1	3156956	3157456
chr1	3157472	3157972
chr1	3161383	3161883
chr1	3164480	3164980
chr1	3167021	3167521
chr1	3168214	3168714
chr1	3169447	3169947
chr1	3170473	3170973
chr1	3170992	3171492
chr1	3171878	3172378
chr1	3172644	3173144
chr1	3173204	3173704
chr1	3174288	3174788
chr1	3174796	3175296
chr1	3180349	3180849
chr1	3181919	3182419
chr1	3182658	3183158
chr1	3183567	3184067
chr1	3185475	3185975
chr1	3186361	3186861
chr1	3187135	3187635
chr1	3187736	3188236
chr1	3198849	3199349
chr1	3206723	3207223
chr1	3208026	3208526
chr1	3208806	3209306
chr1	3211962	3212462
chr1	3213549	3214049
chr1	3216767	3217267
chr1	3217343	3217843
chr1	3217925	3218425
chr1	3219129	3219629
chr1	3220057	3220557
chr1	3220972	3221472
chr1	3222317	3222817
chr1	3226792	3227292
chr1	3227485	3227985
chr1	3229197	3229697
chr1	3236016	3236516
chr1	3240894	3241394
chr1	3245629	3246129
chr1	3247455	3247955
chr1	3251730	3252230
chr1	3268140	3268640
chr1	3270774	3271274
chr1	3273606	3274106
chr1	3276075	3276575
chr1	3277239	3277739
chr1	3278590	3279090
chr1	3282493	3282993
chr1	3283893	3284393
chr1	3292241	3292741
chr1	3312035	3312535
chr1	3312545	3313045
chr1	3313047	3313547
chr1	3313554	3314054
chr1	3314334	3314834
chr1	3314937	3315437
chr1	3315718	3316218
chr1	3316564	3317064
chr1	3319915	3320415
chr1	3323132	3323632
chr1	3323863	3324363
chr1	3328011	3328511
chr1	3328633	3329133
chr1	3329724	3330224
chr1	3330359	3330859
chr1	3331443	3331943
chr1	3331993	3332493
chr1	3332610	3333110
chr1	3333879	3334379
chr1	3334974	3335474
chr1	3341520	3342020
chr1	3344655	3345155
chr1	3345793	3346293
chr1	3346438	3346938
chr1	3347240	3347740
chr1	3348199	3348699
chr1	3349029	3349529
chr1	3349659	3350159
chr1	3350768	3351268
chr1	3351436	3351936
chr1	3352334	3352834
chr1	3352835	3353335
chr1	3353366	3353866
chr1	3356389	3356889
chr1	3357191	3357691
chr1	3357708	3358208
chr1	3360776	3361276
chr1	3362060	3362560
chr1	3365458	3365958
chr1	3366018	3366518
chr1	3366652	3367152
chr1	3369101	3369601
chr1	3369728	3370228
chr1	3373236	3373736
chr1	3380386	3380886
chr1	3385554	3386054
chr1	3387275	3387775
chr1	3388386	3388886
chr1	3391820	3392320
chr1	3393331	3393831
chr1	3393902	3394402
chr1	3394406	3394906
chr1	3402223	3402723
chr1	3403564	3404064
chr1	3404352	3404852
chr1	3409415	3409915
chr1	3410071	3410571
chr1	3414429	3414929
chr1	3418178	3418678
chr1	3418845	3419345
chr1	3419608	3420108
chr1	3420265	3420765
chr1	3420767	3421267
chr1	3422298	3422798
chr1	3422888	3423388
chr1	3423426	3423926
chr1	3424054	3424554
chr1	3424630	3425130
chr1	3425177	3425677
chr1	3431229	3431729
chr1	3434809	3435309
chr1	3439674	3440174
chr1	3440276	3440776
chr1	3441152	3441652
chr1	3442135	3442635
chr1	3444732	3445232
chr1	3445286	3445786
chr1	3452146	3452646
chr1	3453083	3453583
chr1	3453613	3454113
chr1	3454256	3454756
chr1	3454788	3455288
chr1	3455438	3455938
chr1	3455992	3456492
chr1	3456564	3457064
chr1	3457445	3457945
chr1	3458103	3458603
chr1	3458939	3459439
chr1	3459585	3460085
chr1	3460595	3461095
chr1	3461608	3462108
chr1	3462778	3463278
chr1	3463910	3464410
chr1	3466102	3466602
chr1	3466966	3467466
chr1	3467733	3468233
chr1	3468880	3469380
chr1	3469397	3469897
chr1	3470642	3471142
chr1	3471638	3472138
chr1	3473580	3474080
chr1	3475675	3476175
chr1	3476378	3476878
chr1	3477073	3477573
chr1	3477723	3478223
chr1	3478684	3479184
chr1	3479293	3479793
chr1	3480266	3480766
chr1	3480960	3481460
chr1	3481593	3482093
chr1	3482498	3482998
chr1	3483049	3483549
chr1	3483793	3484293
chr1	3484765	3485265
chr1	3485777	3486277
chr1	3488348	3488848
chr1	3489905	3490405
chr1	3490446	3490946
chr1	3491157	3491657
chr1	3492035	3492535
chr1	3492580	3493080
chr1	3494130	3494630
chr1	3494941	3495441
chr1	3495930	3496430
chr1	3497386	3497886
chr1	3497887	3498387
chr1	3498500	3499000
chr1	3501793	3502293
chr1	3503170	3503670
chr1	3504031	3504531
chr1	3509996	3510496
chr1	3510707	3511207
chr1	3511324	3511824
chr1	3512175	3512675
chr1	3512978	3513478
chr1	3515936	3516436
chr1	3522984	3523484
chr1	3524136	3524636
chr1	3527835	3528335
chr1	3528635	3529135
chr1	3529345	3529845
chr1	3529888	3530388
chr1	3530704	3531204
chr1	3531259	3531759
chr1	3532072	3532572
chr1	3532929	3533429
chr1	3534973	3535473
chr1	3537813	3538313
chr1	3538462	3538962
chr1	3539063	3539563
chr1	3539902	3540402
chr1	3540984	3541484
chr1	3541767	3542267
chr1	3542362	3542862
chr1	3542926	3543426
chr1	3543601	3544101
chr1	3544181	3544681
chr1	3545573	3546073
chr1	3547456	3547956
chr1	3548132	3548632
chr1	3549428	3549928
chr1	3550598	3551098
chr1	3551127	3551627
chr1	3552827	3553327
chr1	3555664	3556164
chr1	3556300	3556800
chr1	3557324	3557824
chr1	3557973	3558473
chr1	3558591	3559091
chr1	3559736	3560236
chr1	3560527	3561027
chr1	3561767	3562267
chr1	3562548	3563048
chr1	3563729	3564229
chr1	3564280	3564780
chr1	3565165	3565665
chr1	3565771	3566271
chr1	3568765	3569265
chr1	3570427	3570927
chr1	3573432	3573932
chr1	3575987	3576487
chr1	3576542	3577042
chr1	3577324	3577824
chr1	3577866	3578366
chr1	3578408	3578908
chr1	3579051	3579551
chr1	3581330	3581830
chr1	3586023	3586523
chr1	3587344	3587844
chr1	3590277	3590777
chr1	3591157	3591657
chr1	3594913	3595413
chr1	3598107	3598607
chr1	3598806	3599306
chr1	3599319	3599819
chr1	3610427	3610927
chr1	3611476	3611976
chr1	3612366	3612866
chr1	3615052	3615552
chr1	3615616	3616116
chr1	3617302	3617802
chr1	3618222	3618722
chr1	3618891	3619391
chr1	3620427	3620927
chr1	3621024	3621524
chr1	3622101	3622601
chr1	3622817	3623317
chr1	3624008	3624508
chr1	3624638	3625138
chr1	3625209	3625709
chr1	3625993	3626493
chr1	3626850	3627350
chr1	3627732	3628232
chr1	3628276	3628776
chr1	3628952	3629452
chr1	3629497	3629997
chr1	3630086	3630586
chr1	3630938	3631438
chr1	3631516	3632016
chr1	3632074	3632574
chr1	3632621	3633121
chr1	3633271	3633771
chr1	3633965	3634465
chr1	3640563	3641063
chr1	3649317	3649817
chr1	3649873	3650373
chr1	3650485	3650985
chr1	3651081	3651581
chr1	3652144	3652644
chr1	3653009	3653509
chr1	3657145	3657645
chr1	3659809	3660309
chr1	3662770	3663270
chr1	3664941	3665441
chr1	3665966	3666466
chr1	3666499	3666999
chr1	3668028	3668528
chr1	3668745	3669245
chr1	3671733	3672233
chr1	3674073	3674573
chr1	3674582	3675082
chr1	3677557	3678057
chr1	3683952	3684452
chr1	3694871	3695371
chr1	3695551	3696051
chr1	3696066	3696566
chr1	3697756	3698256
chr1	3698611	3699111
chr1	3701533	3702033
chr1	3703273	3703773
chr1	3706358	3706858
chr1	3707257	3707757
chr1	3708386	3708886
chr1	3708950	3709450
chr1	3710563	3711063
chr1	3711162	3711662
chr1	3711815	3712315
chr1	3712594	3713094
chr1	3713162	3713662
chr1	3714167	3714667
chr1	3714740	3715240
chr1	3715680	3716180
chr1	3716281	3716781
chr1	3717047	3717547
chr1	3717971	3718471
chr1	3719205	3719705
chr1	3722493	3722993
chr1	3723103	3723603
chr1	3723677	3724177
chr1	3724329	3724829
chr1	3725247	3725747
chr1	3727216	3727716
chr1	3730079	3730579
chr1	3731166	3731666
chr1	3731776	3732276
chr1	3732615	3733115
chr1	3745669	3746169
chr1	3746177	3746677
chr1	3747156	3747656
chr1	3748099	3748599
chr1	3767799	3768299
chr1	3770137	3770637
chr1	3771603	3772103
chr1	3772384	3772884
chr1	3773206	3773706
chr1	3773757	3774257
chr1	3774829	3775329
chr1	3775399	3775899
chr1	3775906	3776406
chr1	3777077	3777577
chr1	3777621	3778121
chr1	3778455	3778955
chr1	3779443	3779943
chr1	3785745	3786245
chr1	3786973	3787473
chr1	3788486	3788986
chr1	3789452	3789952
chr1	3790364	3790864
chr1	3795598	3796098
chr1	3796310	3796810
chr1	3796853	3797353
chr1	3797492	3797992
chr1	3799338	3799838
chr1	3800068	3800568
chr1	3801379	3801879
chr1	3803834	3804334
chr1	3804491	3804991
chr1	3805538	3806038
chr1	3806295	3806795
chr1	3809885	3810385
chr1	3811282	3811782
chr1	3812312	3812812
chr1	3813591	3814091
chr1	3814543	3815043
chr1	3815148	3815648
chr1	3816424	3816924
chr1	3817242	3817742
chr1	3818110	3818610
chr1	3818688	3819188
chr1	3819754	3820254
chr1	3820256	3820756
chr1	3820974	3821474
chr1	3821871	3822371
chr1	3822838	3823338
chr1	3823423	3823923
chr1	3823936	3824436
chr1	3825361	3825861
chr1	3826461	3826961
chr1	3827060	3827560
chr1	3827685	3828185
chr1	3828725	3829225
chr1	3830038	3830538
chr1	3830811	3831311
chr1	3831710	3832210
chr1	3832749	3833249
chr1	3833578	3834078
chr1	3835718	3836218
chr1	3836282	3836782
chr1	3836916	3837416
chr1	3837654	3838154
chr1	3838599	3839099
chr1	3839761	3840261
chr1	3841125	3841625
chr1	3841673	3842173
chr1	3842247	3842747
chr1	3843035	3843535
chr1	3843549	3844049
chr1	3844103	3844603
chr1	3844630	3845130
chr1	3845241	3845741
chr1	3846500	3847000
chr1	3847124	3847624
chr1	3847719	3848219
chr1	3848404	3848904
chr1	3849078	3849578
chr1	3849796	3850296
chr1	3850826	3851326
chr1	3851507	3852007
chr1	3852067	3852567
chr1	3852661	3853161
chr1	3853948	3854448
chr1	3854541	3855041
chr1	3855175	3855675
chr1	3855683	3856183
chr1	3856492	3856992
chr1	3857072	3857572
chr1	3858139	3858639
chr1	3858707	3859207
chr1	3859339	3859839
chr1	3860475	3860975
chr1	3861320	3861820
chr1	3862108	3862608
chr1	3863159	3863659
chr1	3864583	3865083
chr1	3865315	3865815
chr1	3866031	3866531
chr1	3866753	3867253
chr1	3867502	3868002
chr1	3868297	3868797
chr1	3869588	3870088
chr1	3873113	3873613
chr1	3879426	3879926
chr1	3881651	3882151
chr1	3882340	3882840
chr1	3883562	3884062
chr1	3884267	3884767
chr1	3885981	3886481
chr1	3888181	3888681
chr1	3889814	3890314
chr1	3890427	3890927
chr1	3890989	3891489
chr1	3893553	3894053
chr1	3894888	3895388
chr1	3895887	3896387
chr1	3896394	3896894
chr1	3897815	3898315
chr1	3899192	3899692
chr1	3899841	3900341
chr1	3900550	3901050
chr1	3901167	3901667
chr1	3902078	3902578
chr1	3902663	3903163
chr1	3903743	3904243
chr1	3904287	3904787
chr1	3904981	3905481
chr1	3905556	3906056
chr1	3906764	3907264
chr1	3907500	3908000
chr1	3908625	3909125
chr1	3910704	3911204
chr1	3912786	3913286
chr1	3918729	3919229
chr1	3923189	3923689
chr1	3924097	3924597
chr1	3924853	3925353
chr1	3927947	3928447
chr1	3938492	3938992
chr1	3940298	3940798
chr1	3954599	3955099
chr1	3956292	3956792
chr1	3959330	3959830
chr1	3968930	3969430
chr1	3969498	3969998
chr1	3970843	3971343
chr1	3971793	3972293
chr1	3974550	3975050
chr1	3975172	3975672
chr1	3978873	3979373
chr1	3979399	3979899
chr1	3982029	3982529
chr1	3992001	3992501
chr1	3993874	3994374
chr1	3994549	3995049
chr1	3995551	3996051
chr1	3997910	3998410
chr1	4048009	4048509
chr1	4048512	4049012
chr1	4057328	4057828
chr1	4070953	4071453
chr1	4071583	4072083
chr1	4072392	4072892
chr1	4083608	4084108
chr1	4086069	4086569
chr1	4101532	4102032
chr1	4107691	4108191
chr1	4108800	4109300
chr1	4109494	4109994
chr1	4115514	4116014
chr1	4118856	4119356
chr1	4127181	4127681
chr1	4131932	4132432
chr1	4132523	4133023
chr1	4134365	4134865
chr1	4145224	4145724
chr1	4170990	4171490
chr1	4171561	4172061
chr1	4173103	4173603
chr1	4173701	4174201
chr1	4179820	4180320
chr1	4232319	4232819
chr1	4233456	4233956
chr1	4234166	4234666
chr1	4253845	4254345
chr1	4254893	4255393
chr1	4265787	4266287
[truncated: 668,738+ more rows]

## Sheet: AC peakSet
The genomic coordinates of the peaks in AC class
Chromosome	Start	End
chr1	6613336	6613836
chr1	6785026	6785526
chr1	9910296	9910796
chr1	16644466	16644966
chr1	16904672	16905172
chr1	16913763	16914263
chr1	30718103	30718603
chr1	36149399	36149899
chr1	67684927	67685427
chr1	90717890	90718390
chr1	109984417	109984917
chr1	110338832	110339332
chr1	110963793	110964293
chr1	113812178	113812678
chr1	150629425	150629925
chr1	151281868	151282368
chr1	156767085	156767585
chr1	164558684	164559184
chr1	169485768	169486268
chr1	184754740	184755240
chr1	221741944	221742444
chr1	241519540	241520040
chr1	243255663	243256163
chr1	244451929	244452429
chr1	244652667	244653167
chr1	248837980	248838480
chr2	676639	677139
chr2	9630858	9631358
chr2	26345727	26346227
chr2	30146444	30146944
chr2	44168262	44168762
chr2	61538184	61538684
chr2	64751037	64751537
chr2	65056068	65056568
chr2	65130039	65130539
chr2	69914416	69914916
chr2	112275209	112275709
chr2	130342540	130343040
chr2	152717283	152717783
chr2	175168174	175168674
chr2	177212334	177212834
chr2	178451013	178451513
chr2	207165990	207166490
chr2	218270086	218270586
chr2	231708121	231708621
chr2	239401068	239401568
chr3	14948236	14948736
chr3	27484185	27484685
chr3	31532270	31532770
chr3	50299241	50299741
chr3	52057197	52057697
chr3	100401207	100401707
chr3	105868840	105869340
chr3	120094293	120094793
chr3	120094799	120095299
chr3	125915780	125916280
chr3	171460238	171460738
chr3	184561449	184561949
chr3	186570210	186570710
chr4	337398	337898
chr4	781716	782216
chr4	1346846	1347346
chr4	2536177	2536677
chr4	6269465	6269965
chr4	9152459	9152959
chr4	37686314	37686814
chr4	48780205	48780705
chr4	56435437	56435937
chr4	75724261	75724761
chr4	77820062	77820562
chr4	82900426	82900926
chr4	101347452	101347952
chr4	107720192	107720692
chr4	121870252	121870752
chr4	140523823	140524323
chr4	148442381	148442881
chr4	152779636	152780136
chr4	165112696	165113196
chr4	173334287	173334787
chr5	33440588	33441088
chr5	34929130	34929630
chr5	41903932	41904432
chr5	43121251	43121751
chr5	43313249	43313749
chr5	57173539	57174039
chr5	61331888	61332388
chr5	75336766	75337266
chr5	81750945	81751445
chr5	88141141	88141641
chr5	91379982	91380482
chr5	109409799	109410299
chr5	138464854	138465354
chr5	151771305	151771805
chr5	160119385	160119885
chr5	168579510	168580010
chr5	173887918	173888418
chr6	2765048	2765548
chr6	18155067	18155567
chr6	31827362	31827862
chr6	32195503	32196003
chr6	33322868	33323368
chr6	52995085	52995585
chr6	63572191	63572691
chr6	85678559	85679059
chr6	93419425	93419925
chr6	116229226	116229726
chr6	151452045	151452545
chr6	166627058	166627558
chr7	7640395	7640895
chr7	12687275	12687775
chr7	21427147	21427647
chr7	21427708	21428208
chr7	25125199	25125699
chr7	27662761	27663261
chr7	35800801	35801301
chr7	36152778	36153278
chr7	44606583	44607083
chr7	75738960	75739460
chr7	76359068	76359568
chr7	77122240	77122740
chr7	77696103	77696603
chr7	100586263	100586763
chr7	105012866	105013366
chr7	106284837	106285337
chr7	108525940	108526440
chr7	112206371	112206871
chr7	112450098	112450598
chr7	112939613	112940113
chr7	123534515	123535015
chr7	129224603	129225103
chr7	138459978	138460478
chr8	25458305	25458805
chr8	28889922	28890422
chr8	30082933	30083433
chr8	38996377	38996877
chr8	56211243	56211743
chr8	66667131	66667631
chr8	70401907	70402407
chr8	73972041	73972541
chr8	92965438	92965938
chr8	100721903	100722403
chr8	101205455	101205955
chr8	109539414	109539914
chr8	123416237	123416737
chr9	2014897	2015397
chr9	4792521	4793021
chr9	15422476	15422976
chr9	34989334	34989834
chr9	71910997	71911497
chr9	72365138	72365638
chr9	79571391	79571891
chr9	113221215	113221715
chr9	113401140	113401640
chr9	134024974	134025474
chr9	136790798	136791298
chr10	24724415	24724915
chr10	68331771	68332271
chr10	72273591	72274091
chr10	74826036	74826536
chr10	102917935	102918435
chr10	110919077	110919577
chr10	132537277	132537777
chr11	694990	695490
chr11	3797415	3797915
chr11	6234654	6235154
chr11	9460543	9461043
chr11	10808746	10809246
chr11	43680401	43680901
chr11	45847154	45847654
chr11	64778571	64779071
chr11	65615211	65615711
chr11	83156689	83157189
chr11	95231246	95231746
chr11	106077267	106077767
chr11	119121164	119121664
chr11	123062006	123062506
chr11	125111556	125112056
chr12	2812387	2812887
chr12	13000152	13000652
chr12	53379595	53380095
chr12	53451691	53452191
chr12	53500672	53501172
chr12	67269027	67269527
chr12	71663683	71664183
chr12	82686620	82687120
chr12	89709243	89709743
chr12	92145699	92146199
chr12	95217384	95217884
chr12	103929847	103930347
chr12	113221008	113221508
chr12	122225913	122226413
chr13	19958325	19958825
chr13	35476458	35476958
chr13	44436635	44437135
chr13	45341005	45341505
chr13	49443877	49444377
chr13	97433166	97433666
chr13	109786400	109786900
chr13	110712935	110713435
chr14	20461479	20461979
chr14	24114460	24114960
chr14	24141486	24141986
chr14	32076618	32077118
chr14	49862711	49863211
chr14	51094934	51095434
chr14	52552405	52552905
chr14	59188301	59188801
chr14	74084372	74084872
chr14	91060454	91060954
chr14	100238516	100239016
chr14	101947955	101948455
chr15	43791968	43792468
chr15	75451677	75452177
chr15	89087999	89088499
chr15	97960180	97960680
chr16	589646	590146
chr16	2155234	2155734
chr16	2905238	2905738
chr16	9091252	9091752
chr16	22190665	22191165
chr16	28950643	28951143
chr16	30658048	30658548
chr16	30922478	30922978
chr16	50741644	50742144
chr16	53503190	53503690
chr16	58499835	58500335
chr16	68448420	68448920
chr17	1716165	1716665
chr17	4967206	4967706
chr17	7572480	7572980
chr17	7614903	7615403
chr17	17972329	17972829
chr17	21284292	21284792
chr17	28952244	28952744
chr17	42388368	42388868
chr17	58517763	58518263
chr17	75855281	75855781
chr17	77958235	77958735
chr18	9475109	9475609
chr18	12377156	12377656
chr18	50287736	50288236
chr18	59139506	59140006
chr18	62186891	62187391
chr18	62522756	62523256
chr18	62714853	62715353
chr18	67516645	67517145
chr18	74291856	74292356
chr18	79068914	79069414
chr19	4328248	4328748
chr19	4471709	4472209
chr19	6424747	6425247
chr19	10835565	10836065
chr19	10870866	10871366
chr19	14529199	14529699
chr19	18203882	18204382
chr19	18521999	18522499
chr19	19385458	19385958
chr19	32675016	32675516
chr19	38850195	38850695
chr19	40465678	40466178
chr19	42075689	42076189
chr19	42268628	42269128
chr19	42325269	42325769
chr19	48619111	48619611
chr19	49641763	49642263
chr19	49676663	49677163
chr19	49766411	49766911
chr19	50511145	50511645
chr19	54137337	54137837
chr19	54189660	54190160
chr19	55339162	55339662
chr20	17682109	17682609
chr20	33993018	33993518
chr20	35742132	35742632
chr20	41028421	41028921
chr21	14383051	14383551
chr21	28992744	28993244
chr21	33641593	33642093
chr21	33642162	33642662
chr21	36156278	36156778
chr21	42496159	42496659
chr22	36387940	36388440
chr22	40636561	40637061
chr22	41286111	41286611
chr1	1375122	1375622
chr1	2227600	2228100
chr1	2586344	2586844
chr1	7704386	7704886
chr1	9539084	9539584
chr1	18956593	18957093
chr1	27725512	27726012
chr1	31644696	31645196
chr1	32394286	32394786
chr1	44674309	44674809
chr1	54053183	54053683
chr1	58783833	58784333
chr1	70410896	70411396
chr1	88992674	88993174
chr1	145957806	145958306
chr1	149886557	149887057
chr1	150235914	150236414
chr1	156500680	156501180
chr1	169893731	169894231
chr1	171781167	171781667
chr1	172532600	172533100
chr1	174999658	175000158
chr1	180631689	180632189
chr1	185156903	185157403
chr1	186375149	186375649
chr1	211579073	211579573
chr1	212284937	212285437
chr1	212608339	212608839
chr1	228139818	228140318
chr1	228457674	228458174
chr1	230978722	230979222
chr1	234610781	234611281
chr1	235504290	235504790
chr1	246931771	246932271
chr2	24076266	24076766
chr2	24971760	24972260
chr2	46698796	46699296
chr2	48440455	48440955
chr2	54723202	54723702
chr2	55050336	55050836
chr2	55617503	55618003
chr2	62705350	62705850
chr2	70142548	70143048
chr2	74458026	74458526
chr2	74653933	74654433
chr2	88627570	88628070
chr2	96857851	96858351
chr2	112054066	112054566
chr2	135531085	135531585
chr2	144332368	144332868
chr2	172555727	172556227
chr2	197453159	197453659
chr2	197499760	197500260
chr2	200811592	200812092
chr2	219543690	219544190
chr2	226801002	226801502
chr3	9397222	9397722
chr3	25664712	25665212
chr3	32106235	32106735
chr3	33440307	33440807
chr3	38024853	38025353
chr3	38137003	38137503
chr3	38164865	38165365
chr3	43621816	43622316
chr3	48556674	48557174
chr3	49412055	49412555
chr3	49786378	49786878
chr3	50235834	50236334
chr3	51941851	51942351
chr3	66997882	66998382
chr3	75434989	75435489
chr3	93979790	93980290
chr3	98522700	98523200
chr3	98901591	98902091
chr3	107522687	107523187
chr3	108222244	108222744
chr3	115147096	115147596
chr3	130111342	130111842
chr3	136752388	136752888
chr3	150546335	150546835
chr3	160755215	160755715
chr3	170222121	170222621
chr3	185937819	185938319
chr3	195442922	195443422
chr4	2242044	2242544
chr4	2262058	2262558
chr4	15002114	15002614
chr4	17810546	17811046
chr4	26860458	26860958
chr4	39182067	39182567
chr4	39527414	39527914
chr4	42656895	42657395
chr4	48341116	48341616
chr4	52712093	52712593
chr4	82284751	82285251
chr4	82429266	82429766
chr4	83012755	83013255
chr4	83034834	83035334
chr4	99950233	99950733
chr4	102827847	102828347
chr4	107989493	107989993
chr4	119212329	119212829
chr4	122732273	122732773
chr4	128287741	128288241
chr4	129093403	129093903
chr4	150581588	150582088
chr4	151099294	151099794
chr4	155758705	155759205
chr4	165327333	165327833
chr4	169620167	169620667
chr4	173370580	173371080
chr4	176319615	176320115
chr5	32312841	32313341
chr5	34007839	34008339
chr5	55994802	55995302
chr5	58459892	58460392
chr5	58582788	58583288
chr5	69093644	69094144
chr5	75511498	75511998
chr5	88660949	88661449
chr5	90409529	90410029
chr5	91383185	91383685
chr5	96935644	96936144
chr5	98773301	98773801
chr5	108748551	108749051
chr5	115544596	115545096
chr5	119070787	119071287
chr5	123511833	123512333
chr5	131796920	131797420
chr5	132866263	132866763
chr5	134225954	134226454
chr5	140401288	140401788
chr5	140564192	140564692
chr5	150758493	150758993
chr5	154858234	154858734
chr5	176647059	176647559
chr5	177426194	177426694
chr5	179698600	179699100
chr6	11537238	11537738
chr6	24721063	24721563
chr6	31620229	31620729
chr6	33249144	33249644
chr6	33417962	33418462
chr6	47309717	47310217
chr6	52284717	52285217
chr6	52419919	52420419
chr6	62286029	62286529
chr6	70413100	70413600
chr6	71420620	71421120
chr6	73521015	73521515
chr6	85643107	85643607
chr6	88963490	88963990
chr6	89080426	89080926
chr6	110179805	110180305
chr6	111873236	111873736
chr6	118893750	118894250
chr6	122399263	122399763
chr6	147202320	147202820
chr6	152982951	152983451
chr6	170554001	170554501
chr7	149220	149720
chr7	2631523	2632023
chr7	26200667	26201167
chr7	30284209	30284709
chr7	39949449	39949949
chr7	44082387	44082887
chr7	44848011	44848511
chr7	55365747	55366247
chr7	66493360	66493860
chr7	66628468	66628968
chr7	73522127	73522627
chr7	75914849	75915349
chr7	76379851	76380351
chr7	77798421	77798921
chr7	87345300	87345800
chr7	100148521	100149021
chr7	100538842	100539342
chr7	100612184	100612684
chr7	105876443	105876943
chr7	112450633	112451133
chr7	120950396	120950896
chr7	127651763	127652263
chr7	135211343	135211843
chr7	138002014	138002514
chr7	139359542	139360042
chr7	140696432	140696932
chr7	151057798	151058298
chr7	152463680	152464180
chr7	155297534	155298034
chr7	158829343	158829843
chr8	8228203	8228703
chr8	38386190	38386690
chr8	41528822	41529322
chr8	42152604	42153104
chr8	51898969	51899469
chr8	60516602	60517102
chr8	61714441	61714941
chr8	63168310	63168810
chr8	66613192	66613692
chr8	73878705	73879205
chr8	78665779	78666279
chr8	80029767	80030267
chr8	93916613	93917113
chr8	100951888	100952388
chr8	108443228	108443728
chr8	109334002	109334502
chr8	119873432	119873932
chr8	123072351	123072851
chr8	134832112	134832612
chr8	143609471	143609971
chr8	144326638	144327138
chr8	144827192	144827692
chr9	3525790	3526290
chr9	20683939	20684439
chr9	34458391	34458891
chr9	37465271	37465771
chr9	74497047	74497547
chr9	89310630	89311130
chr9	92764747	92765247
chr9	94165839	94166339
chr9	99821544	99822044
chr9	100098869	100099369
chr9	101398422	101398922
chr9	101533528	101534028
chr9	120714373	120714873
chr9	122905131	122905631
chr9	127396690	127397190
chr9	127980918	127981418
chr9	129028240	129028740
chr9	131289169	131289669
chr9	137200624	137201124
chr9	137240899	137241399
chr10	931542	932042
chr10	1049141	1049641
chr10	3172619	3173119
chr10	12068574	12069074
chr10	16817299	16817799
chr10	25016313	25016813
chr10	31759923	31760423
chr10	73096742	73097242
chr10	73811629	73812129
chr10	73997799	73998299
chr10	95693798	95694298
chr10	99620520	99621020
chr10	102502026	102502526
chr10	102502607	102503107
chr10	102642004	102642504
chr10	104121737	104122237
chr10	110211025	110211525
chr10	118754887	118755387
chr10	119725666	119726166
chr11	207231	207731
chr11	1389448	1389948
chr11	2400251	2400751
chr11	18634240	18634740
chr11	57667648	57668148
chr11	59615633	59616133
chr11	62753980	62754480
chr11	62831875	62832375
chr11	64185680	64186180
chr11	64241136	64241636
chr11	64305047	64305547
chr11	64878412	64878912
chr11	65117598	65118098
chr11	73760997	73761497
chr11	75814852	75815352
chr11	77994657	77995157
chr11	83071705	83072205
chr11	106022126	106022626
chr11	108222560	108223060
chr11	125592355	125592855
chr11	126268735	126269235
chr11	130069521	130070021
chr11	133956783	133957283
chr12	6534132	6534632
chr12	6852167	6852667
chr12	26938135	26938635
chr12	27523805	27524305
chr12	45990491	45990991
chr12	50111752	50112252
chr12	53079234	53079734
chr12	53625867	53626367
chr12	53675982	53676482
chr12	53727345	53727845
chr12	54280361	54280861
chr12	55817647	55818147
chr12	55973639	55974139
chr12	57752207	57752707
chr12	76084548	76085048
chr12	82358545	82359045
chr12	96035477	96035977
chr12	106774300	106774800
chr12	109713451	109713951
chr12	112013064	112013564
chr12	112125218	112125718
chr12	120686643	120687143
chr12	122526848	122527348
chr13	19863421	19863921
chr13	26557334	26557834
chr13	28718829	28719329
chr13	30617512	30618012
chr13	44141796	44142296
chr13	44577110	44577610
chr13	51452889	51453389
chr13	51583938	51584438
chr13	52011987	52012487
chr13	52455151	52455651
chr13	60163758	60164258
chr13	67230184	67230684
chr13	102596636	102597136
chr13	110715263	110715763
chr14	20343111	20343611
chr14	20682551	20683051
chr14	21103498	21103998
chr14	21269462	21269962
chr14	21455944	21456444
chr14	22929296	22929796
chr14	23301428	23301928
chr14	23320962	23321462
chr14	24135829	24136329
chr14	44961805	44962305
chr14	45134284	45134784
chr14	61695192	61695692
chr14	70809478	70809978
chr14	71320069	71320569
chr14	75258906	75259406
chr14	77097907	77098407
chr14	81533792	81534292
chr14	90828021	90828521
chr14	99480752	99481252
chr14	99683816	99684316
chr14	104752488	104752988
chr15	39782319	39782819
chr15	44195072	44195572
chr15	45200269	45200769
chr15	58770948	58771448
chr15	65869188	65869688
chr15	77420087	77420587
chr15	81324057	81324557
chr16	1782462	1782962
chr16	2882492	2882992
chr16	5097951	5098451
chr16	11915816	11916316
chr16	13919756	13920256
chr16	20900226	20900726
chr16	21520263	21520763
chr16	30370583	30371083
chr16	30378073	30378573
chr16	46689071	46689571
chr16	46831274	46831774
chr16	53703822	53704322
chr16	56931786	56932286
chr16	67183454	67183954
chr16	67660574	67661074
chr16	67806450	67806950
chr16	75517157	75517657
chr16	81006962	81007462
chr16	81096216	81096716
chr16	84504511	84505011
chr16	87492842	87493342
chr17	4710197	4710697
chr17	7931815	7932315
chr17	8630745	8631245
chr17	18039061	18039561
chr17	18183179	18183679
chr17	44186550	44187050
chr17	44775560	44776060
chr17	47895870	47896370
chr17	48047895	48048395
chr17	48892340	48892840
chr17	49764012	49764512
chr17	49788962	49789462
chr17	50866244	50866744
chr17	63621903	63622403
chr17	63773481	63773981
chr17	75289259	75289759
chr17	76671589	76672089
chr17	82022874	82023374
chr18	9136359	9136859
chr18	21740394	21740894
chr18	32092281	32092781
chr18	51197652	51198152
chr18	79679209	79679709
chr18	80034021	80034521
chr19	1103709	1104209
chr19	1268964	1269464
chr19	1490510	1491010
chr19	1652770	1653270
chr19	2096431	2096931
chr19	2151538	2152038
chr19	4065798	4066298
chr19	4791150	4791650
chr19	5904444	5904944
chr19	8390010	8390510
chr19	8412955	8413455
chr19	11374767	11375267
chr19	11435236	11435736
chr19	12938233	12938733
chr19	13952047	13952547
chr19	14117644	14118144
chr19	14136711	14137211
chr19	16111360	16111860
chr19	18281409	18281909
chr19	35748233	35748733
chr19	39390944	39391444
chr19	40750433	40750933
chr19	40777795	40778295
chr19	43595920	43596420
chr19	44890726	44891226
chr19	45178133	45178633
chr19	46661195	46661695
chr19	47515069	47515569
chr19	48468953	48469453
chr19	48993253	48993753
chr19	50329016	50329516
chr19	50658057	50658557
chr19	50724602	50725102
chr19	52189526	52190026
chr19	54159641	54160141
chr19	54190353	54190853
chr20	23358050	23358550
chr20	23361814	23362314
chr20	32357919	32358419
chr20	41618261	41618761
chr20	62238073	62238573
chr21	31558946	31559446
chr21	33542667	33543167
chr21	37267360	37267860
chr21	42974079	42974579
chr22	24555065	24555565
chr22	35299898	35300398
chr22	38705554	38706054
chr22	40951410	40951910
chr22	41091425	41091925
chr22	41381509	41382009
chr22	41589769	41590269
chr22	42090666	42091166
chr22	49918252	49918752
chr1	3900587	3901087
chr1	7961260	7961760
chr1	17053898	17054398
chr1	20661309	20661809
chr1	24642862	24643362
chr1	32817257	32817757
chr1	32964710	32965210
chr1	36385742	36386242
chr1	37931601	37932101
chr1	40040338	40040838
chr1	42766899	42767399
chr1	43946411	43946911
chr1	85276418	85276918
chr1	113929287	113929787
chr1	144551953	144552453
chr1	150282082	150282582
chr1	150876485	150876985
chr1	154974213	154974713
chr1	155227338	155227838
chr1	155859231	155859731
chr1	169105984	169106484
chr1	173867873	173868373
chr1	174999139	174999639
chr1	179954433	179954933
chr1	207052987	207053487
chr1	207822598	207823098
chr1	226062403	226062903
chr1	226939868	226940368
chr1	228109143	228109643
chr1	228165360	228165860
chr1	232629929	232630429
chr1	235328128	235328628
chr1	236794959	236795459
chr1	246566133	246566633
chr2	20051506	20052006
chr2	20446742	20447242
chr2	32356852	32357352
chr2	42361316	42361816
chr2	42810267	42810767
chr2	48314117	48314617
chr2	54455886	54456386
chr2	61470973	61471473
chr2	73233183	73233683
chr2	74374468	74374968
chr2	96265809	96266309
chr2	97663977	97664477
chr2	148020733	148021233
chr2	152718305	152718805
chr2	158456506	158457006
chr2	162343773	162344273
chr2	190880486	190880986
chr2	195656933	195657433
chr2	207529650	207530150
chr2	218959366	218959866
chr2	219278946	219279446
chr2	231464306	231464806
chr2	240560904	240561404
chr2	241315091	241315591
chr3	9249435	9249935
chr3	9933499	9933999
chr3	12810146	12810646
chr3	13479939	13480439
chr3	14124667	14125167
chr3	23945004	23945504
chr3	41961919	41962419
chr3	42590546	42591046
chr3	45688922	45689422
chr3	48663878	48664378
chr3	50337290	50337790
chr3	66220694	66221194
chr3	84958667	84959167
chr3	111674332	111674832
chr3	113696623	113697123
chr3	120742310	120742810
chr3	136861840	136862340
chr3	155854305	155854805
chr3	155870263	155870763
chr3	156554941	156555441
chr3	156674163	156674663
chr3	167734840	167735340
chr3	179562543	179563043
chr3	197736742	197737242
chr4	3074322	3074822
chr4	9691616	9692116
chr4	17576844	17577344
chr4	47485018	47485518
chr4	48830778	48831278
chr4	51842825	51843325
chr4	74157791	74158291
chr4	82373928	82374428
chr4	87038756	87039256
chr4	98143280	98143780
chr4	99563521	99564021
chr4	119454426	119454926
chr4	139453532	139454032
chr4	139734791	139735291
chr4	152535900	152536400
chr4	158671927	158672427
chr4	165378753	165379253
chr4	185396282	185396782
chr4	185471082	185471582
chr5	10353387	10353887
chr5	14249959	14250459
chr5	54310419	54310919
chr5	62403718	62404218
chr5	79514317	79514817
chr5	81971724	81972224
chr5	90529517	90530017
chr5	91380812	91381312
chr5	103258446	103258946
chr5	111512452	111512952
chr5	137754216	137754716
chr5	138543143	138543643
chr5	141636665	141637165
chr5	141747102	141747602
chr5	146182472	146182972
chr5	151252711	151253211
chr5	154754947	154755447
chr5	157731482	157731982
chr5	173056952	173057452
chr5	176388821	176389321
chr5	176619115	176619615
chr6	11093482	11093982
chr6	15245464	15245964
chr6	20401366	20401866
chr6	30717327	30717827
chr6	31862765	31863265
chr6	33391433	33391933
chr6	36594036	36594536
chr6	37169675	37170175
chr6	41072607	41073107
chr6	43013791	43014291
chr6	43170920	43171420
chr6	75284627	75285127
chr6	79537219	79537719
chr6	80004290	80004790
chr6	87702156	87702656
chr6	110815265	110815765
chr6	110874446	110874946
chr6	113858841	113859341
chr6	116279702	116280202
chr6	116571055	116571555
chr6	132814186	132814686
chr6	136289729	136290229
chr6	144216254	144216754
chr6	145964189	145964689
chr6	151390361	151390861
chr7	7968496	7968996
chr7	16645567	16646067
chr7	33062619	33063119
chr7	33129004	33129504
chr7	35694917	35695417
chr7	38177904	38178404
chr7	43869366	43869866
chr7	44123383	44123883
chr7	63926175	63926675
chr7	65006526	65007026
chr7	66996438	66996938
chr7	72828100	72828600
chr7	87152199	87152699
chr7	92134263	92134763
chr7	92528377	92528877
chr7	99472538	99473038
chr7	99504675	99505175
chr7	107168438	107168938
chr7	107743472	107743972
chr7	108569522	108570022
chr7	128167334	128167834
chr7	133081943	133082443
chr7	139340296	139340796
chr7	143901982	143902482
chr7	151519877	151520377
chr8	11802424	11802924
chr8	17922436	17922936
chr8	26383051	26383551
chr8	26577553	26578053
chr8	28401818	28402318
chr8	30658074	30658574
chr8	31033399	31033899
chr8	56993698	56994198
chr8	66428615	66429115
chr8	85220226	85220726
chr8	85601726	85602226
chr8	93917531	93918031
chr8	94822970	94823470
chr8	94895486	94895986
chr8	116766209	116766709
chr8	123274495	123274995
chr8	124474442	124474942
chr8	124998219	124998719
chr8	143829153	143829653
chr8	144137468	144137968
chr9	5437657	5438157
chr9	6681129	6681629
chr9	27573534	27574034
chr9	35603890	35604390
chr9	35657702	35658202
chr9	83980057	83980557
chr9	86282329	86282829
chr9	86354295	86354795
chr9	90642642	90643142
chr9	95510636	95511136
chr9	107282760	107283260
chr9	109119794	109120294
chr9	124861815	124862315
chr9	125241144	125241644
chr9	127245009	127245509
chr9	128067825	128068325
chr10	14837869	14838369
chr10	22003550	22004050
chr10	26860788	26861288
chr10	67764183	67764683
chr10	69123792	69124292
chr10	70146443	70146943
chr10	70170338	70170838
chr10	74150892	74151392
chr10	84139158	84139658
chr10	100912650	100913150
chr10	104268863	104269363
chr10	110871557	110872057
chr10	119596865	119597365
chr10	123154064	123154564
chr11	535451	535951
chr11	17207777	17208277
chr11	31817819	31818319
chr11	58578808	58579308
chr11	62573803	62574303
chr11	64269851	64270351
chr11	65487455	65487955
chr11	65890315	65890815
chr11	66677711	66678211
chr11	66958268	66958768
chr11	73779329	73779829
chr11	85628181	85628681
chr11	93741376	93741876
chr11	95789583	95790083
chr11	101914949	101915449
chr11	111601964	111602464
chr11	115504214	115504714
chr11	118436002	118436502
chr11	126062719	126063219
chr12	2794712	2795212
chr12	8026450	8026950
chr12	27243954	27244454
chr12	31728898	31729398
chr12	48682127	48682627
chr12	49188908	49189408
chr12	53054233	53054733
chr12	53492902	53493402
chr12	56127859	56128359
chr12	57078626	57079126
chr12	57520383	57520883
chr12	98593367	98593867
chr12	133130244	133130744
chr13	24922686	24923186
chr13	27620406	27620906
chr13	31162119	31162619
chr13	33542605	33543105
chr13	49936201	49936701
chr13	52450445	52450945
chr13	52652464	52652964
chr14	22919067	22919567
chr14	23006946	23007446
chr14	24147117	24147617
chr14	24242458	24242958
chr14	26598224	26598724
chr14	31026308	31026808
chr14	31457211	31457711
chr14	44896902	44897402
chr14	50312009	50312509
chr14	60091625	60092125
chr14	63543203	63543703
chr14	65102363	65102863
chr14	67359698	67360198
chr14	73458444	73458944
chr14	74493252	74493752
chr14	75294061	75294561
chr14	75660773	75661273
chr14	77028479	77028979
chr14	77321157	77321657
chr14	77616562	77617062
chr14	79279017	79279517
chr14	81220849	81221349
chr14	92793846	92794346
chr14	94026087	94026587
chr14	102086934	102087434
chr14	103333860	103334360
chr14	105490609	105491109
chr15	42575225	42575725
chr15	42920622	42921122
chr15	44426964	44427464
chr15	45198513	45199013
chr15	65792153	65792653
chr15	70099521	70100021
chr15	73633269	73633769
chr15	75453829	75454329
chr15	76931409	76931909
chr15	80059267	80059767
chr15	92809046	92809546
chr15	92882249	92882749
chr15	99251077	99251577
chr15	99733289	99733789
chr15	100602177	100602677
chr16	2223201	2223701
chr16	19555316	19555816
chr16	27549794	27550294
chr16	29973461	29973961
chr16	30923105	30923605
chr16	57185861	57186361
chr16	57735430	57735930
chr16	66880212	66880712
chr16	77190572	77191072
chr16	87391985	87392485
chr17	1516494	1516994
chr17	7857368	7857868
chr17	28335350	28335850
chr17	41688501	41689001
chr17	41689116	41689616
chr17	47970683	47971183
chr17	49677897	49678397
chr17	57662899	57663399
chr17	64145613	64146113
chr17	74872957	74873457
chr17	75456314	75456814
chr17	82698602	82699102
chr18	9913641	9914141
chr18	35240733	35241233
chr18	74148089	74148589
chr18	74495907	74496407
chr19	680310	680810
chr19	1275620	1276120
chr19	2051037	2051537
chr19	2944857	2945357
chr19	3970959	3971459
chr19	4342766	4343266
chr19	4402196	4402696
chr19	4968702	4969202
chr19	7829714	7830214
chr19	11738791	11739291
chr19	18152764	18153264
chr19	19776312	19776812
chr19	19865591	19866091
chr19	20052027	20052527
chr19	39342037	39342537
chr19	42242472	42242972
chr19	45584625	45585125
chr19	48363966	48364466
chr19	48623970	48624470
chr19	48714071	48714571
chr19	49876465	49876965
chr19	50025339	50025839
chr19	55599428	55599928
chr19	58401087	58401587
chr20	3888955	3889455
chr20	5119845	5120345
chr20	5126403	5126903
chr20	18507587	18508087
chr20	43457599	43458099
chr20	44885330	44885830
chr20	46689345	46689845
chr20	63864869	63865369
chr21	16588388	16588888
chr21	25734765	25735265
chr21	37366424	37366924
chr21	45893984	45894484
chr22	19122298	19122798
chr22	29603226	29603726
chr22	33920861	33921361
chr22	36776198	36776698
chr22	37844113	37844613
chr22	38181660	38182160
chr22	41620925	41621425
chr22	46035731	46036231
chr22	50582706	50583206
chr1	1115989	1116489
chr1	10210200	10210700
chr1	11262476	11262976
chr1	26921399	26921899
chr1	30824331	30824831
chr1	35192957	35193457
chr1	43649769	43650269
chr1	53945713	53946213
chr1	54406213	54406713
chr1	59814395	59814895
chr1	86914213	86914713
chr1	94418090	94418590
chr1	95072427	95072927
chr1	113390166	113390666
chr1	116372908	116373408
chr1	153727648	153728148
chr1	155001963	155002463
chr1	156193700	156194200
chr1	156338111	156338611
chr1	159780626	159781126
chr1	167220461	167220961
chr1	167721651	167722151
chr1	182604194	182604694
chr1	192808670	192809170
chr1	202348328	202348828
chr1	235866812	235867312
chr1	248825765	248826265
chr2	25041799	25042299
chr2	27050517	27051017
chr2	27370145	27370645
chr2	36966487	36966987
chr2	38602865	38603365
chr2	44941625	44942125
chr2	46543897	46544397
chr2	61764146	61764646
chr2	63588645	63589145
chr2	68252435	68252935
chr2	71227137	71227637
chr2	85538829	85539329
chr2	96208682	96209182
chr2	96815948	96816448
chr2	99140991	99141491
chr2	101001952	101002452
chr2	112054964	112055464
chr2	128027136	128027636
chr2	128027917	128028417
chr2	135741414	135741914
chr2	135985382	135985882
chr2	165953669	165954169
chr2	178194167	178194667
chr2	224585340	224585840
chr2	231706872	231707372
chr2	241508475	241508975
chr3	16264847	16265347
chr3	23916824	23917324
chr3	32570679	32571179
chr3	49469852	49470352
chr3	49939764	49940264
chr3	101573825	101574325
chr3	111978736	111979236
chr3	114056330	114056830
chr3	123584901	123585401
chr3	128123664	128124164
chr3	141737994	141738494
chr3	160565438	160565938
chr3	167735414	167735914
chr3	179147850	179148350
chr3	184174428	184174928
chr3	184298860	184299360
chr4	473970	474470
chr4	3955636	3956136
chr4	7068000	7068500
chr4	8158677	8159177
chr4	18021896	18022396
chr4	25913861	25914361
chr4	26319389	26319889
chr4	55395634	55396134
chr4	75673211	75673711
chr4	77156529	77157029
chr4	86359876	86360376
chr4	88592120	88592620
chr4	98658479	98658979
chr4	108620187	108620687
chr4	113762429	113762929
chr4	127782016	127782516
chr4	127964962	127965462
chr4	145180423	145180923
chr4	151760849	151761349
chr4	155376660	155377160
chr4	157220437	157220937
chr4	174829063	174829563
chr4	183504338	183504838
chr5	6868186	6868686
chr5	80654784	80655284
chr5	87267541	87268041
chr5	87412743	87413243
chr5	98928778	98929278
chr5	118988328	118988828
chr5	123423237	123423737
chr5	131263761	131264261
chr5	131635113	131635613
chr5	134370898	134371398
chr5	146203285	146203785
chr5	147782527	147783027
chr5	149357682	149358182
chr5	163459858	163460358
chr5	176447930	176448430
chr5	176537685	176538185
chr5	179559388	179559888
chr5	179732422	179732922
chr6	2245383	2245883
chr6	5003492	5003992
chr6	32128083	32128583
chr6	32971855	32972355
chr6	34248920	34249420
chr6	35259260	35259760
chr6	36027441	36027941
chr6	42984148	42984648
chr6	53547820	53548320
chr6	73653841	73654341
chr6	83193063	83193563
chr6	107958080	107958580
chr6	108559289	108559789
chr6	125790646	125791146
chr6	142946172	142946672
chr6	155314363	155314863
chr6	156687006	156687506
chr6	159789482	159789982
chr6	162727664	162728164
chr7	5569986	5570486
chr7	6081297	6081797
chr7	23013908	23014408
chr7	73738651	73739151
chr7	94657838	94658338
chr7	124929754	124930254
chr7	134986233	134986733
chr7	151028054	151028554
chr8	9555562	9556062
chr8	18084143	18084643
chr8	23528570	23529070
chr8	27258224	27258724
chr8	38786908	38787408
chr8	86342213	86342713
chr8	91069879	91070379
chr8	124372562	124373062
chr8	129939666	129940166
chr8	144104084	144104584
chr9	2843874	2844374
chr9	4679276	4679776
chr9	5628768	5629268
chr9	6412894	6413394
chr9	6757392	6757892
chr9	26956132	26956632
chr9	33024949	33025449
chr9	33816803	33817303
chr9	81689540	81690040
chr9	85741803	85742303
chr9	87725765	87726265
chr9	96418209	96418709
chr9	124771095	124771595
chr9	129178052	129178552
chr9	137459155	137459655
chr10	3785191	3785691
chr10	13161212	13161712
chr10	15168430	15168930
chr10	23438659	23439159
chr10	31032175	31032675
chr10	37976511	37977011
chr10	59176374	59176874
chr10	59906374	59906874
chr10	71212278	71212778
chr10	72297876	72298376
chr10	72691815	72692315
chr10	75402048	75402548
chr10	78303156	78303656
chr10	78406922	78407422
chr10	89701230	89701730
chr10	95561188	95561688
chr10	101818337	101818837
chr10	102152010	102152510
chr10	125719303	125719803
chr11	6481141	6481641
chr11	6619244	6619744
chr11	16738304	16738804
chr11	18322022	18322522
chr11	27472653	27473153
chr11	62707294	62707794
chr11	65354409	65354909
chr11	65888314	65888814
chr11	66638295	66638795
chr11	67118862	67119362
chr11	71786790	71787290
chr11	76444517	76445017
chr11	77820613	77821113
chr11	78188496	78188996
chr11	82900238	82900738
chr11	85664867	85665367
chr11	111926966	111927466
chr11	119381482	119381982
chr11	123511097	123511597
chr11	130002320	130002820
chr12	6764113	6764613
chr12	8243307	8243807
chr12	8697695	8698195
chr12	15882079	15882579
chr12	22544010	22544510
chr12	45728705	45729205
chr12	49110687	49111187
chr12	49131202	49131702
chr12	53005973	53006473
chr12	54279568	54280068
chr12	56645796	56646296
chr12	57693790	57694290
chr12	57744734	57745234
chr12	57846878	57847378
chr12	78864359	78864859
chr12	88141942	88142442
chr12	103965626	103966126
chr12	104137964	104138464
chr12	107093618	107094118
chr12	110124082	110124582
chr12	118135809	118136309
chr12	125049440	125049940
chr13	30306885	30307385
chr13	44435018	44435518
chr13	60396226	60396726
chr13	75549177	75549677
chr13	95676722	95677222
chr13	97222000	97222500
chr14	23285973	23286473
chr14	23469049	23469549
chr14	35826019	35826519
chr14	39432216	39432716
chr14	49586280	49586780
chr14	49620476	49620976
chr14	52729763	52730263
chr14	54396580	54397080
chr14	73026937	73027437
chr14	90383124	90383624
chr14	90396711	90397211
chr14	95534658	95535158
chr14	103715419	103715919
chr15	31326322	31326822
chr15	33194569	33195069
chr15	41972378	41972878
chr15	64163030	64163530
chr15	72474026	72474526
chr15	74615449	74615949
chr15	84654084	84654584
chr15	85380214	85380714
chr15	90994442	90994942
chr15	98852242	98852742
chr16	1611951	1612451
chr16	3003753	3004253
chr16	10743946	10744446
chr16	31142163	31142663
chr16	31459216	31459716
chr16	46883994	46884494
chr16	74984944	74985444
chr16	75464566	75465066
chr16	88662915	88663415
chr16	89490480	89490980
chr17	7014489	7014989
chr17	7239363	7239863
chr17	7251797	7252297
chr17	7403948	7404448
chr17	8156355	8156855
chr17	19378100	19378600
chr17	21043149	21043649
chr17	28951382	28951882
chr17	29293958	29294458
chr17	39980330	39980830
chr17	41786609	41787109
chr17	45060902	45061402
chr17	45161549	45162049
chr17	46193244	46193744
chr17	56833751	56834251
chr17	60677501	60678001
chr17	63550094	63550594
chr17	63842782	63843282
chr17	76540720	76541220
chr17	76737138	76737638
chr17	81238876	81239376
chr17	81860726	81861226
chr17	82292630	82293130
chr18	12991013	12991513
chr18	32470740	32471240
chr18	37412759	37413259
chr18	37565877	37566377
chr18	50878824	50879324
chr19	1021017	1021517
chr19	3505913	3506413
chr19	5680431	5680931
chr19	6110440	6110940
chr19	6737372	6737872
chr19	7943626	7944126
chr19	8832657	8833157
chr19	9818930	9819430
chr19	9834901	9835401
chr19	12551356	12551856
chr19	13747517	13748017
chr19	15379622	15380122
chr19	17267073	17267573
chr19	17470002	17470502
chr19	18192616	18193116
chr19	19663553	19664053
chr19	29811589	29812089
chr19	35740446	35740946
chr19	35931447	35931947
chr19	38335503	38336003
chr19	38374381	38374881
chr19	40798745	40799245
chr19	41263650	41264150
chr19	42242985	42243485
chr19	45995042	45995542
chr19	46860025	46860525
chr19	47048504	47049004
chr19	48637273	48637773
chr19	49487150	49487650
chr19	49496012	49496512
chr19	49690800	49691300
chr19	49869269	49869769
chr19	51367426	51367926
chr19	55385615	55386115
chr19	56121236	56121736
chr19	58380839	58381339
chr20	310308	310808
chr20	2102113	2102613
chr20	3767614	3768114
chr20	21125709	21126209
chr20	23350456	23350956
chr20	45935042	45935542
chr21	29024689	29025189
chr21	29073510	29074010
chr21	32771808	32772308
chr21	33479737	33480237
chr21	39183252	39183752
chr21	42009760	42010260
chr21	42892927	42893427
chr21	45863332	45863832
chr22	20020762	20021262
chr22	20917049	20917549
chr22	21001909	21002409
chr22	41448324	41448824
chr22	42079438	42079938
chr22	43014989	43015489
chrX	3814819	3815319
chrX	15854648	15855148
chr1	7668380	7668880
chr1	8817470	8817970
chr1	9588406	9588906
chr1	12019082	12019582
chr1	15524299	15524799
chr1	23344188	23344688
chr1	25997985	25998485
chr1	27914558	27915058
chr1	28235817	28236317
chr1	32072638	32073138
chr1	37692079	37692579
chr1	41360889	41361389
chr1	46303093	46303593
chr1	62436046	62436546
chr1	65420025	65420525
chr1	66924691	66925191
chr1	89994808	89995308
chr1	112395878	112396378
chr1	150363824	150364324
chr1	151146478	151146978
chr1	151539988	151540488
chr1	153958383	153958883
chr1	155244465	155244965
chr1	161202065	161202565
chr1	162561157	162561657
chr1	166876091	166876591
chr1	174799457	174799957
chr1	179882355	179882855
chr1	181088428	181088928
chr1	197201247	197201747
chr1	198937238	198937738
chr1	201154286	201154786
chr1	244048134	244048634
chr1	244835063	244835563
chr1	244864349	244864849
chr2	677185	677685
chr2	10812613	10813113
chr2	25878328	25878828
chr2	26785630	26786130
chr2	28392542	28393042
chr2	29921455	29921955
chr2	85595428	85595928
chr2	88691351	88691851
chr2	112645545	112646045
chr2	134918375	134918875
chr2	151828266	151828766
chr2	153871512	153872012
chr2	157876151	157876651
chr2	170928862	170929362
chr2	173965187	173965687
chr2	184598182	184598682
chr2	208265796	208266296
chr2	209423735	209424235
chr2	213284131	213284631
chr2	218568199	218568699
chr2	219253730	219254230
chr2	219388124	219388624
chr2	222860730	222861230
chr2	226791471	226791971
chr2	231514197	231514697
chr2	232696958	232697458
chr3	8501453	8501953
chr3	9843817	9844317
chr3	12004055	12004555
chr3	14178441	14178941
chr3	14651342	14651842
chr3	40453075	40453575
chr3	50321255	50321755
chr3	52536291	52536791
chr3	88058962	88059462
chr3	100260558	100261058
chr3	112561791	112562291
chr3	121749659	121750159
chr3	121834887	121835387
chr3	132722652	132723152
chr3	136196204	136196704
chr3	150763003	150763503
chr3	185282689	185283189
chr4	6783440	6783940
chr4	13484147	13484647
chr4	39977705	39978205
chr4	55948561	55949061
chr4	68349906	68350406
chr4	70993328	70993828
chr4	83484968	83485468
chr4	88284470	88284970
chr4	102345299	102345799
chr4	113761632	113762132
chr4	118278414	118278914
chr4	133148928	133149428
chr4	140373334	140373834
chr4	173369597	173370097
chr5	17217284	17217784
chr5	19988007	19988507
chr5	55534831	55535331
chr5	59587405	59587905
chr5	68215429	68215929
chr5	72320049	72320549
chr5	119268393	119268893
chr5	131170557	131171057
chr5	134004536	134005036
chr5	138337990	138338490
chr5	149960413	149960913
chr5	163437241	163437741
chr5	171387480	171387980
chr5	174145749	174146249
chr5	176416352	176416852
chr6	2999454	2999954
chr6	26123780	26124280
chr6	28335392	28335892
chr6	29632971	29633471
chr6	30617176	30617676
chr6	33271780	33272280
chr6	33410160	33410660
chr6	34514523	34515023
chr6	46652646	46653146
chr6	53359309	53359809
chr6	69796834	69797334
chr6	89829473	89829973
chr6	108558317	108558817
chr6	109009366	109009866
chr6	131459886	131460386
chr6	133952871	133953371
chr6	157021940	157022440
chr7	4883524	4884024
chr7	5530417	5530917
chr7	10973489	10973989
chr7	56051416	56051916
chr7	56106322	56106822
chr7	65373516	65374016
chr7	65872865	65873365
chr7	66204973	66205473
chr7	67302338	67302838
chr7	87059569	87060069
chr7	102748617	102749117
chr7	123748792	123749292
chr7	134646502	134647002
chr7	140176948	140177448
chr7	140479271	140479771
chr7	151227055	151227555
chr8	9904173	9904673
chr8	27311166	27311666
chr8	89984029	89984529
chr8	102412622	102413122
chr8	103414935	103415435
chr8	123516898	123517398
chr9	19380046	19380546
chr9	20622339	20622839
chr9	21802363	21802863
chr9	33264562	33265062
chr9	34665831	34666331
chr9	35072472	35072972
chr9	35111430	35111930
chr9	36190624	36191124
chr9	75088075	75088575
chr9	92670006	92670506
chr9	94166553	94167053
chr9	96449852	96450352
chr9	105244262	105244762
chr9	111631048	111631548
chr9	113056530	113057030
chr9	113275374	113275874
chr9	128067199	128067699
chr9	128275816	128276316
chr9	128552194	128552694
chr9	131373327	131373827
chr9	136849091	136849591
chr9	136886135	136886635
chr10	5813232	5813732
chr10	5889810	5890310
chr10	14878558	14879058
chr10	25174446	25174946
chr10	28302911	28303411
chr10	32346130	32346630
chr10	37857482	37857982
chr10	43408994	43409494
chr10	44978598	44979098
chr10	62804536	62805036
chr10	70403806	70404306
chr10	97640373	97640873
chr10	101353767	101354267
chr10	102245087	102245587
chr10	102503588	102504088
chr10	103276823	103277323
chr10	114174070	114174570
chr11	10857894	10858394
chr11	13668289	13668789
chr11	17077463	17077963
chr11	22829623	22830123
chr11	32583467	32583967
chr11	34916327	34916827
chr11	57649744	57650244
chr11	59668981	59669481
chr11	62123606	62124106
chr11	64917100	64917600
chr11	66288986	66289486
chr11	68460095	68460595
chr11	72080478	72080978
chr11	72112172	72112672
chr11	73597966	73598466
chr11	83285837	83286337
chr11	94493675	94494175
chr11	95790185	95790685
chr11	119095252	119095752
chr12	2890483	2890983
chr12	6689350	6689850
chr12	6851160	6851660
chr12	12266754	12267254
chr12	26523649	26524149
chr12	49322827	49323327
chr12	51951224	51951724
chr12	56360061	56360561
chr12	63779569	63780069
chr12	76559593	76560093
chr12	89708691	89709191
chr12	108731369	108731869
chr12	120317410	120317910
chr12	123232948	123233448
chr12	132593876	132594376
chr13	29850435	29850935
chr13	30465735	30466235
chr13	39037741	39038241
chr13	100674707	100675207
chr14	21476819	21477319
chr14	55270998	55271498
chr14	58297980	58298480
chr14	61762116	61762616
chr14	63641803	63642303
chr14	64986896	64987396
chr14	68979219	68979719
chr14	75237383	75237883
chr14	77457474	77457974
chr14	95157324	95157824
chr14	99604122	99604622
chr14	101760360	101760860
chr14	105020954	105021454
chr15	32641445	32641945
chr15	41230921	41231421
chr15	41774148	41774648
chr15	43510594	43511094
chr15	58749616	58750116
chr15	59657343	59657843
chr15	65611037	65611537
chr15	69160312	69160812
chr16	4616110	4616610
chr16	18801459	18801959
chr16	22297054	22297554
chr16	53130694	53131194
chr16	57300449	57300949
chr16	67935568	67936068
chr16	68237393	68237893
chr16	89873976	89874476
chr16	90077206	90077706
chr17	1684721	1685221
chr17	3636134	3636634
chr17	15999483	15999983
chr17	28041406	28041906
chr17	45148209	45148709
chr17	46193823	46194323
chr17	60599872	60600372
chr17	68247695	68248195
chr17	75779676	75780176
chr17	75784443	75784943
chr17	81222835	81223335
chr18	14132329	14132829
chr18	31942928	31943428
chr18	42437547	42438047
chr18	63970289	63970789
chr18	70205786	70206286
chr19	2783250	2783750
chr19	6373106	6373606
chr19	8513932	8514432
chr19	12791173	12791673
chr19	15418877	15419377
chr19	17830760	17831260
chr19	35702227	35702727
chr19	36014086	36014586
chr19	36054125	36054625
chr19	38930554	38931054
chr19	40425806	40426306
chr19	41363967	41364467
chr19	41859487	41859987
chr19	41884030	41884530
chr19	42283531	42284031
chr19	42396829	42397329
chr19	45692119	45692619
chr19	48720559	48721059
chr19	49118894	49119394
chr19	49877372	49877872
chr19	50333348	50333848
chr19	51339620	51340120
chr19	55461600	55462100
chr19	55653614	55654114
chr19	56140887	56141387
chr20	325143	325643
chr20	31723458	31723958
chr20	34876127	34876627
chr20	44805897	44806397
chr20	45812263	45812763
chr20	63894739	63895239
chr21	15064812	15065312
chr21	37072520	37073020
chr22	19144576	19145076
chr22	20858624	20859124
chr22	30423845	30424345
chr22	30968917	30969417
chr22	37199259	37199759
chr22	40044028	40044528
chr22	41832713	41833213
chr22	42614708	42615208
chr1	1307790	1308290
chr1	2189460	2189960
chr1	3624649	3625149
chr1	5992263	5992763
chr1	6579696	6580196
chr1	7783744	7784244
chr1	10032573	10033073
chr1	33036717	33037217
chr1	33127165	33127665
chr1	38859577	38860077
chr1	39691232	39691732
chr1	45303449	45303949
chr1	45490996	45491496
chr1	45686939	45687439
chr1	46132803	46133303
chr1	52404282	52404782
chr1	89524553	89525053
chr1	100249693	100250193
chr1	113904913	113905413
chr1	119140134	119140634
chr1	151716698	151717198
chr1	153922829	153923329
chr1	155135562	155136062
chr1	155308481	155308981
chr1	160098827	160099327
chr1	165630920	165631420
chr1	174159200	174159700
chr1	185316033	185316533
chr1	185317135	185317635
chr1	193059289	193059789
chr1	205813020	205813520
chr1	211259119	211259619
chr1	244970496	244970996
chr2	24047245	24047745
chr2	27051318	27051818
chr2	28751596	28752096
chr2	33599184	33599684
chr2	43595844	43596344
chr2	55419673	55420173
chr2	64144227	64144727
chr2	74507494	74507994
chr2	112584219	112584719
chr2	113756392	113756892
chr2	119178599	119179099
chr2	169827164	169827664
chr2	171433986	171434486
chr2	200963504	200964004
chr2	201451353	201451853
chr2	202634620	202635120
chr2	203014415	203014915
chr2	218963153	218963653
chr2	219206496	219206996
chr2	219229423	219229923
chr2	231781107	231781607
chr2	238060697	238061197
chr2	241355816	241356316
chr3	3126629	3127129
chr3	5187320	5187820
chr3	9731066	9731566
chr3	12663940	12664440
chr3	19946802	19947302
chr3	28241269	28241769
chr3	37860344	37860844
chr3	40309381	40309881
chr3	42148941	42149441
chr3	47475684	47476184
chr3	48439949	48440449
chr3	48717088	48717588
chr3	50359407	50359907
chr3	57227468	57227968
chr3	100709159	100709659
chr3	101724643	101725143
chr3	128617543	128618043
chr3	130893788	130894288
chr3	138329724	138330224
chr3	149812898	149813398
chr3	172750424	172750924
chr3	184335651	184336151
chr3	186108992	186109492
chr3	187745496	187745996
chr3	197749511	197750011
chr4	124183	124683
chr4	26320488	26320988
chr4	47914395	47914895
chr4	52722186	52722686
chr4	84582611	84583111
chr4	84966461	84966961
chr4	90127179	90127679
chr4	102827300	102827800
chr4	102868710	102869210
chr4	106316020	106316520
chr4	112231432	112231932
chr4	112637170	112637670
chr4	121823779	121824279
chr4	122922387	122922887
chr4	128061035	128061535
chr4	139177076	139177576
chr4	146522157	146522657
chr4	152352638	152353138
chr4	164383793	164384293
chr4	183659004	183659504
chr5	34915366	34915866
chr5	36151776	36152276
chr5	44808622	44809122
chr5	45696155	45696655
chr5	56909688	56910188
chr5	62305954	62306454
chr5	65721928	65722428
chr5	83077211	83077711
chr5	88675716	88676216
chr5	112737573	112738073
chr5	115625914	115626414
chr5	127030352	127030852
chr5	128083134	128083634
chr5	134845708	134846208
chr5	138331718	138332218
chr5	138463974	138464474
chr5	138491874	138492374
chr5	139341507	139342007
chr5	141040975	141041475
chr5	141618906	141619406
chr5	151758448	151758948
chr5	157142689	157143189
chr5	178153807	178154307
chr6	10722785	10723285
chr6	24775088	24775588
chr6	31815176	31815676
chr6	31958825	31959325
chr6	31972001	31972501
chr6	32177654	32178154
chr6	32968336	32968836
chr6	33454245	33454745
chr6	36197044	36197544
chr6	43369419	43369919
chr6	44246788	44247288
chr6	46491726	46492226
chr6	68634898	68635398
chr6	79078320	79078820
chr6	80106337	80106837
chr6	83853277	83853777
chr6	99425164	99425664
chr6	116680817	116681317
chr6	127266551	127267051
chr6	130560192	130560692
chr6	132512878	132513378
chr6	135497503	135498003
chr6	139374403	139374903
chr6	157380912	157381412
chr6	158168067	158168567
chr6	159790090	159790590
chr7	1138106	1138606
chr7	2403153	2403653
chr7	12686599	12687099
chr7	23531772	23532272
chr7	30134479	30134979
chr7	63899989	63900489
chr7	65037936	65038436
chr7	73578434	73578934
chr7	74657261	74657761
chr7	74658277	74658777
chr7	77536750	77537250
chr7	79453639	79454139
chr7	87628028	87628528
chr7	97872251	97872751
chr7	98106564	98107064
chr7	100101293	100101793
chr7	100428978	100429478
chr7	100673226	100673726
chr7	100889597	100890097
chr7	101244843	101245343
chr7	139230871	139231371
chr7	150378996	150379496
chr8	56074373	56074873
chr8	73746737	73747237
chr8	81721110	81721610
chr8	94553313	94553813
chr8	97775511	97776011
chr8	102864005	102864505
chr8	118111669	118112169
chr8	133571853	133572353
chr8	144465662	144466162
chr9	33473727	33474227
chr9	34048692	34049192
chr9	34178726	34179226
chr9	35814862	35815362
chr9	71768719	71769219
chr9	78296792	78297292
chr9	89318536	89319036
chr9	111896498	111896998
chr9	129036241	129036741
chr9	129080699	129081199
chr10	7787856	7788356
chr10	28532540	28533040
chr10	46030399	46030899
chr10	89643815	89644315
chr10	97334763	97335263
chr10	97425913	97426413
chr10	97498509	97499009
chr10	97687083	97687583
chr10	102714186	102714686
chr11	575917	576417
chr11	4608030	4608530
chr11	6683252	6683752
chr11	9314515	9315015
chr11	13463073	13463573
chr11	18394206	18394706
chr11	33700667	33701167
chr11	47767261	47767761
chr11	58578032	58578532
chr11	65111570	65112070
chr11	65858035	65858535
chr11	65919087	65919587
chr11	66418086	66418586
chr11	66466543	66467043
chr11	66616275	66616775
chr11	71452863	71453363
chr11	73142266	73142766
chr11	76380985	76381485
chr11	121023824	121024324
chr12	752209	752709
chr12	6663043	6663543
chr12	8949763	8950263
chr12	14774024	14774524
chr12	14803405	14803905
chr12	27022228	27022728
chr12	30754705	30755205
chr12	40692149	40692649
chr12	53180360	53180860
chr12	53441326	53441826
chr12	56158060	56158560
chr12	56688199	56688699
chr12	71754562	71755062
chr12	82685666	82686166
chr12	88035228	88035728
chr12	92929173	92929673
chr12	93377588	93378088
chr12	93441957	93442457
chr12	110280892	110281392
chr12	120291928	120292428
chr12	123383635	123384135
chr13	23579066	23579566
chr13	44917807	44918307
chr13	48037747	48038247
chr13	110712238	110712738
[truncated: 224,353+ more rows]

## Sheet: Astrocyte peakSet
The genomic coordinates of the peaks in Astrocyte class
Chromosome	Start	End
chr1	2227608	2228108
chr1	6785085	6785585
chr1	7704402	7704902
chr1	10210195	10210695
chr1	16904693	16905193
chr1	18956596	18957096
chr1	23344187	23344687
chr1	27725591	27726091
chr1	30718102	30718602
chr1	33127106	33127606
chr1	40227075	40227575
chr1	44674278	44674778
chr1	58783848	58784348
chr1	110338860	110339360
chr1	150629405	150629905
chr1	151281870	151282370
chr1	159780639	159781139
chr1	169485745	169486245
chr1	184754703	184755203
chr1	244048188	244048688
chr2	20305286	20305786
chr2	44168231	44168731
chr2	48440475	48440975
chr2	55617534	55618034
chr2	61538141	61538641
chr2	62705380	62705880
chr2	64750749	64751249
chr2	69914709	69915209
chr2	96857877	96858377
chr2	177212268	177212768
chr2	178451012	178451512
chr2	197453143	197453643
chr2	197499754	197500254
chr2	222860738	222861238
chr2	231708123	231708623
chr2	239400846	239401346
chr3	14948228	14948728
chr3	25664715	25665215
chr3	33440271	33440771
chr3	38024879	38025379
chr3	50235768	50236268
chr3	50259975	50260475
chr3	50299277	50299777
chr3	108222252	108222752
chr3	115147482	115147982
chr3	120094797	120095297
chr3	131381432	131381932
chr3	136752370	136752870
chr3	179562591	179563091
chr3	184561431	184561931
chr3	186108995	186109495
chr3	186570264	186570764
chr3	188052111	188052611
chr3	195442942	195443442
chr3	197736761	197737261
chr4	781738	782238
chr4	2262028	2262528
chr4	3074324	3074824
chr4	6269456	6269956
chr4	10018784	10019284
chr4	37686274	37686774
chr4	39182131	39182631
chr4	48341087	48341587
chr4	51842737	51843237
chr4	82900393	82900893
chr4	86593991	86594491
chr4	121870272	121870772
chr4	148442352	148442852
chr4	165327241	165327741
chr4	173334319	173334819
chr4	173370592	173371092
chr4	185396309	185396809
chr5	32312815	32313315
chr5	41903875	41904375
chr5	43121258	43121758
chr5	61331898	61332398
chr5	61408625	61409125
chr5	75336719	75337219
chr5	108748598	108749098
chr5	109409794	109410294
chr5	138464852	138465352
chr5	140401364	140401864
chr5	142770054	142770554
chr5	151771319	151771819
chr5	173887986	173888486
chr6	31827357	31827857
chr6	63572212	63572712
chr6	85678575	85679075
chr6	151452058	151452558
chr6	166627067	166627567
chr7	149102	149602
chr7	1459401	1459901
chr7	7640370	7640870
chr7	30284209	30284709
chr7	38177964	38178464
chr7	44123402	44123902
chr7	44606589	44607089
chr7	66493378	66493878
chr7	66628524	66629024
chr7	75738928	75739428
chr7	76359083	76359583
chr7	77696098	77696598
chr7	82464086	82464586
chr7	100538860	100539360
chr7	100586122	100586622
chr7	112206223	112206723
chr7	129224618	129225118
chr8	25458262	25458762
chr8	73293971	73294471
chr8	143609496	143609996
chr9	71911030	71911530
chr9	72365124	72365624
chr9	79571461	79571961
chr9	89310672	89311172
chr9	92764782	92765282
chr9	93095852	93096352
chr9	94165808	94166308
chr9	129178090	129178590
chr9	130712528	130713028
chr10	931571	932071
chr10	1048811	1049311
chr10	3172617	3173117
chr10	5813288	5813788
chr10	72273612	72274112
chr10	74826200	74826700
chr10	79445634	79446134
chr10	97498570	97499070
chr10	99620320	99620820
chr10	110919073	110919573
chr10	130110595	130111095
chr10	132537332	132537832
chr11	695052	695552
chr11	2400129	2400629
chr11	3797448	3797948
chr11	9460568	9461068
chr11	13668158	13668658
chr11	62831902	62832402
chr11	64185775	64186275
chr11	65615144	65615644
chr11	83156589	83157089
chr11	94493646	94494146
chr11	95231067	95231567
chr11	106077227	106077727
chr11	108222575	108223075
chr11	119121137	119121637
chr11	123062030	123062530
chr11	125111533	125112033
chr12	6852269	6852769
chr12	49741178	49741678
chr12	52032832	52033332
chr12	53625845	53626345
chr12	54280349	54280849
chr12	55817637	55818137
chr12	55973606	55974106
chr12	92145717	92146217
chr12	92929136	92929636
chr12	95217404	95217904
chr12	103930016	103930516
chr12	120686781	120687281
chr12	122225888	122226388
chr13	19958343	19958843
chr13	23579059	23579559
chr13	27620409	27620909
chr13	30617496	30617996
chr13	49443901	49444401
chr13	51584144	51584644
chr13	97432928	97433428
chr13	110712919	110713419
chr13	110914952	110915452
chr14	20343099	20343599
chr14	21269494	21269994
chr14	22929291	22929791
chr14	51094950	51095450
chr14	52552396	52552896
chr14	63641787	63642287
chr14	91060495	91060995
chr14	99480977	99481477
chr14	99683857	99684357
chr14	103333828	103334328
chr14	103715324	103715824
chr15	63189175	63189675
chr15	75454032	75454532
chr15	99251092	99251592
chr16	1782485	1782985
chr16	2155221	2155721
chr16	2214872	2215372
chr16	2882501	2883001
chr16	9091263	9091763
chr16	11742695	11743195
chr16	21520262	21520762
chr16	54929067	54929567
chr16	84504491	84504991
chr16	87492847	87493347
chr17	1716210	1716710
chr17	4967199	4967699
chr17	7572410	7572910
chr17	8630766	8631266
chr17	17972309	17972809
chr17	18039071	18039571
chr17	21284363	21284863
chr17	50866325	50866825
chr17	57084843	57085343
chr17	57662902	57663402
chr17	77958236	77958736
chr17	78359958	78360458
chr17	82022874	82023374
chr18	57398188	57398688
chr18	62715028	62715528
chr19	1490742	1491242
chr19	4402184	4402684
chr19	5720035	5720535
chr19	8390008	8390508
chr19	14117608	14118108
chr19	14136615	14137115
chr19	14529228	14529728
chr19	15379607	15380107
chr19	16659963	16660463
chr19	18203896	18204396
chr19	18522081	18522581
chr19	19063581	19064081
chr19	19385443	19385943
chr19	42242987	42243487
chr19	42268700	42269200
chr19	45178080	45178580
chr19	49496024	49496524
chr19	49641767	49642267
chr19	49766328	49766828
chr19	49877196	49877696
chr19	54136999	54137499
chr19	54159645	54160145
chr19	54189617	54190117
chr19	55339226	55339726
chr20	5126521	5127021
chr20	17682100	17682600
chr20	23361843	23362343
chr21	28992720	28993220
chr21	33642035	33642535
chr21	42496146	42496646
chr21	45306930	45307430
chr22	29603236	29603736
chr22	30423890	30424390
chr22	40636524	40637024
chr22	46035663	46036163
chr22	49918314	49918814
chr1	7961293	7961793
chr1	9910302	9910802
chr1	15524827	15525327
chr1	16644477	16644977
chr1	23368185	23368685
chr1	32394304	32394804
chr1	70410859	70411359
chr1	88992687	88993187
chr1	89994834	89995334
chr1	100352050	100352550
chr1	109253360	109253860
chr1	109984410	109984910
chr1	154974213	154974713
chr1	167936344	167936844
chr1	171781183	171781683
chr1	172532717	172533217
chr1	174999412	174999912
chr1	180631704	180632204
chr1	182391568	182392068
chr1	204411635	204412135
chr1	221741968	221742468
chr1	228139888	228140388
chr1	243255674	243256174
chr1	248838020	248838520
chr2	20446706	20447206
chr2	26345705	26346205
chr2	30146437	30146937
chr2	54723244	54723744
chr2	55050320	55050820
chr2	65130004	65130504
chr2	70142568	70143068
chr2	73233098	73233598
chr2	74374446	74374946
chr2	96265843	96266343
chr2	112275245	112275745
chr2	128027174	128027674
chr2	130342525	130343025
chr2	135985365	135985865
chr2	152717308	152717808
chr2	175168157	175168657
chr2	207165992	207166492
chr2	207529649	207530149
chr2	218270150	218270650
chr2	231464256	231464756
chr2	231706830	231707330
chr2	231781094	231781594
chr3	5187351	5187851
chr3	27484267	27484767
chr3	31532257	31532757
chr3	38136975	38137475
chr3	38164899	38165399
chr3	42804296	42804796
chr3	49411861	49412361
chr3	52536298	52536798
chr3	57060339	57060839
chr3	66500845	66501345
chr3	93979840	93980340
chr3	100260586	100261086
chr3	105868842	105869342
chr3	125915802	125916302
chr3	141368152	141368652
chr3	156674216	156674716
chr3	160565374	160565874
chr4	11428747	11429247
chr4	52712150	52712650
chr4	83034839	83035339
chr4	99563501	99564001
chr4	107720150	107720650
chr4	183504258	183504758
chr4	185142940	185143440
chr4	186700675	186701175
chr5	43313442	43313942
chr5	75511467	75511967
chr5	83077215	83077715
chr5	87412718	87413218
chr5	88141138	88141638
chr5	98773318	98773818
chr5	127030392	127030892
chr5	134370872	134371372
chr5	138543006	138543506
chr5	149960407	149960907
chr5	160119404	160119904
chr5	168579519	168580019
chr5	173056966	173057466
chr5	177426150	177426650
chr6	3247543	3248043
chr6	19804621	19805121
chr6	20401441	20401941
chr6	30617213	30617713
chr6	30717225	30717725
chr6	31620211	31620711
chr6	31815176	31815676
chr6	31862739	31863239
chr6	32195546	32196046
chr6	33418019	33418519
chr6	41072887	41073387
chr6	85643169	85643669
chr6	89080441	89080941
chr6	89638515	89639015
chr6	111873266	111873766
chr7	7968464	7968964
chr7	21427768	21428268
chr7	25125089	25125589
chr7	27662762	27663262
chr7	30504720	30505220
chr7	35800812	35801312
chr7	36152796	36153296
chr7	44582096	44582596
chr7	44847980	44848480
chr7	55365746	55366246
chr7	67302288	67302788
chr7	76317920	76318420
chr7	77798419	77798919
chr7	100611827	100612327
chr7	102748587	102749087
chr7	108525951	108526451
chr7	108569459	108569959
chr7	130921369	130921869
chr7	133081946	133082446
chr7	138459840	138460340
chr7	139340301	139340801
chr7	139359521	139360021
chr7	140607388	140607888
chr7	140696405	140696905
chr7	150378983	150379483
chr7	152463687	152464187
chr7	155297495	155297995
chr7	158829359	158829859
chr8	1823595	1824095
chr8	26382754	26383254
chr8	30082934	30083434
chr8	38996404	38996904
chr8	63168302	63168802
chr8	66667132	66667632
chr8	73972026	73972526
chr8	102239002	102239502
chr8	127854097	127854597
chr8	144104141	144104641
chr8	144137481	144137981
chr9	34989320	34989820
chr9	35072475	35072975
chr9	35603893	35604393
chr9	35657698	35658198
chr9	36258260	36258760
chr9	120714332	120714832
chr9	127396664	127397164
chr9	136790853	136791353
chr9	136886133	136886633
chr9	137240920	137241420
chr10	3785172	3785672
chr10	16817396	16817896
chr10	68900956	68901456
chr10	70170357	70170857
chr10	72297805	72298305
chr10	72331907	72332407
chr10	73997735	73998235
chr10	84244679	84245179
chr10	95561213	95561713
chr10	95693768	95694268
chr10	97687203	97687703
chr10	102245085	102245585
chr10	102501992	102502492
chr10	118754889	118755389
chr11	1389478	1389978
chr11	6234626	6235126
chr11	9573375	9573875
chr11	10808793	10809293
chr11	44565101	44565601
chr11	45847142	45847642
chr11	59615666	59616166
chr11	61815140	61815640
chr11	62753988	62754488
chr11	64241136	64241636
chr11	64778607	64779107
chr11	67508115	67508615
chr11	69075409	69075909
chr11	72793545	72794045
chr11	75814848	75815348
chr11	83071690	83072190
chr11	119095281	119095781
chr11	125592458	125592958
chr11	130069536	130070036
chr12	4031165	4031665
chr12	22624820	22625320
chr12	26938150	26938650
chr12	45990576	45991076
chr12	48682070	48682570
chr12	50111557	50112057
chr12	53079200	53079700
chr12	53500651	53501151
chr12	56127863	56128363
chr12	57078598	57079098
chr12	65121138	65121638
chr12	71663730	71664230
chr12	119178465	119178965
chr13	19863543	19864043
chr13	44141785	44142285
chr13	45341031	45341531
chr13	49247615	49248115
chr13	80341109	80341609
chr13	95676778	95677278
chr13	102596637	102597137
chr13	109786399	109786899
chr13	110094694	110095194
chr14	20461273	20461773
chr14	21103490	21103990
chr14	23301651	23302151
chr14	23321144	23321644
chr14	24141378	24141878
chr14	24242431	24242931
chr14	49620494	49620994
chr14	59188292	59188792
chr14	61695094	61695594
chr14	74084377	74084877
chr14	75278536	75279036
chr14	75294043	75294543
chr14	75660726	75661226
chr14	77616597	77617097
chr14	81533674	81534174
chr14	100238485	100238985
chr14	104752740	104753240
chr15	75451752	75452252
chr15	89087985	89088485
chr15	92809074	92809574
chr16	1611884	1612384
chr16	18801429	18801929
chr16	22190752	22191252
chr16	22297064	22297564
chr16	30370495	30370995
chr16	30378075	30378575
chr16	30657950	30658450
chr16	30922401	30922901
chr16	31459199	31459699
chr16	46689056	46689556
chr16	46883952	46884452
chr16	50741657	50742157
chr16	56931806	56932306
chr16	57735418	57735918
chr16	67183435	67183935
chr16	67806471	67806971
chr16	75517176	75517676
chr16	84617890	84618390
chr16	88662959	88663459
chr16	89490435	89490935
chr17	7014486	7014986
chr17	7403905	7404405
chr17	7614879	7615379
chr17	8156187	8156687
chr17	15699390	15699890
chr17	28041362	28041862
chr17	28335370	28335870
chr17	37359049	37359549
chr17	40417800	40418300
chr17	42388323	42388823
chr17	45060981	45061481
chr17	45148101	45148601
chr17	47895818	47896318
chr17	48047937	48048437
chr17	58517765	58518265
chr17	63773505	63774005
chr17	74872947	74873447
chr17	75289262	75289762
chr17	76264940	76265440
chr17	76671577	76672077
chr17	78840640	78841140
chr17	81860516	81861016
chr17	82458345	82458845
chr18	9475087	9475587
chr18	12990997	12991497
chr18	32092338	32092838
chr18	59139498	59139998
chr18	62186869	62187369
chr18	62522775	62523275
chr18	63422260	63422760
chr18	74496009	74496509
chr18	79679180	79679680
chr19	796849	797349
chr19	1103698	1104198
chr19	1260736	1261236
chr19	1652747	1653247
chr19	2478392	2478892
chr19	2900527	2901027
chr19	4471704	4472204
chr19	4791313	4791813
chr19	4968728	4969228
chr19	5904168	5904668
chr19	6424728	6425228
chr19	7829825	7830325
chr19	7943632	7944132
chr19	10380462	10380962
chr19	10871128	10871628
chr19	11374770	11375270
chr19	11435004	11435504
chr19	11597136	11597636
chr19	16111418	16111918
chr19	32971868	32972368
chr19	35702224	35702724
chr19	38850274	38850774
chr19	40465663	40466163
chr19	40750447	40750947
chr19	40777893	40778393
chr19	41859524	41860024
chr19	42075723	42076223
chr19	44890754	44891254
chr19	48468936	48469436
chr19	48993194	48993694
chr19	49869310	49869810
chr19	49876499	49876999
chr19	50203183	50203683
chr19	50329027	50329527
chr19	50376145	50376645
chr19	52189500	52190000
chr19	54190525	54191025
chr19	56121178	56121678
chr20	325168	325668
chr20	3888982	3889482
chr20	23350458	23350958
chr20	35616229	35616729
chr20	35742076	35742576
chr20	40689041	40689541
chr20	58017503	58018003
chr21	14383063	14383563
chr21	36156256	36156756
chr21	42009811	42010311
chr22	21641909	21642409
chr22	28800384	28800884
chr22	37199266	37199766
chr22	38705357	38705857
chr22	40044357	40044857
chr22	41448185	41448685
chr22	41589797	41590297
chr22	41832738	41833238
chr22	42079407	42079907
chr22	42090625	42091125
chr22	43015019	43015519
chr1	2391483	2391983
chr1	3900550	3901050
chr1	6579680	6580180
chr1	6613336	6613836
chr1	15526565	15527065
chr1	23959473	23959973
chr1	25430543	25431043
chr1	37859413	37859913
chr1	40040352	40040852
chr1	40862186	40862686
chr1	45490979	45491479
chr1	85276410	85276910
chr1	94926979	94927479
chr1	100249673	100250173
chr1	113389987	113390487
chr1	113904894	113905394
chr1	114581508	114582008
chr1	150876521	150877021
chr1	153727696	153728196
chr1	156114045	156114545
chr1	162561180	162561680
chr1	182029489	182029989
chr1	185156852	185157352
chr1	186375173	186375673
chr1	205813015	205813515
chr1	211579060	211579560
chr1	212284906	212285406
chr1	226939844	226940344
chr1	228165439	228165939
chr1	232629949	232630449
chr2	676674	677174
chr2	9630848	9631348
chr2	24971515	24972015
chr2	39124164	39124664
chr2	65056028	65056528
chr2	88627323	88627823
chr2	109613944	109614444
chr2	152718305	152718805
chr2	200811574	200812074
chr2	219206491	219206991
chr2	219543560	219544060
chr2	224585493	224585993
chr2	237966584	237967084
chr2	238060673	238061173
chr3	9397238	9397738
chr3	14124677	14125177
chr3	40309362	40309862
chr3	40453048	40453548
chr3	43621883	43622383
chr3	44338176	44338676
chr3	48088724	48089224
chr3	49723792	49724292
chr3	51941844	51942344
chr3	52057166	52057666
chr3	88058791	88059291
chr3	98522713	98523213
chr3	98901517	98902017
chr3	101573828	101574328
chr3	150762927	150763427
chr3	160755320	160755820
chr3	168095729	168096229
chr3	185282698	185283198
chr3	185937836	185938336
chr4	1346816	1347316
chr4	2536098	2536598
chr4	3292551	3293051
chr4	10063604	10064104
chr4	17577113	17577613
chr4	56435455	56435955
chr4	73069602	73070102
chr4	82430280	82430780
chr4	83012800	83013300
chr4	102868694	102869194
chr4	119454376	119454876
chr4	152779626	152780126
chr4	169620149	169620649
chr4	184649261	184649761
chr5	271268	271768
chr5	36241948	36242448
chr5	55994777	55995277
chr5	57173684	57174184
chr5	81750911	81751411
chr5	88660889	88661389
chr5	90409561	90410061
chr5	119070792	119071292
chr5	119268438	119268938
chr5	131796854	131797354
chr5	132490634	132491134
chr5	132866287	132866787
chr5	150758441	150758941
chr5	176448069	176448569
chr5	176537693	176538193
chr6	2765054	2765554
chr6	11093469	11093969
chr6	11232442	11232942
chr6	11537265	11537765
chr6	18155058	18155558
chr6	31271917	31272417
chr6	32971777	32972277
chr6	52995071	52995571
chr6	73520993	73521493
chr6	109094710	109095210
chr6	135497519	135498019
chr6	151390303	151390803
chr6	162727572	162728072
chr7	2844142	2844642
chr7	6104432	6104932
chr7	21427182	21427682
chr7	23013905	23014405
chr7	23531779	23532279
chr7	39949289	39949789
chr7	44082369	44082869
chr7	73522135	73522635
chr7	75914830	75915330
chr7	77536708	77537208
chr7	100148548	100149048
chr7	105012864	105013364
chr7	112450057	112450557
chr7	112939766	112940266
chr7	138001924	138002424
chr7	151057792	151058292
chr7	155298803	155299303
chr8	11802362	11802862
chr8	28889944	28890444
chr8	42152650	42153150
chr8	60516625	60517125
chr8	66613187	66613687
chr8	100721941	100722441
chr8	102864005	102864505
chr8	109333993	109334493
chr8	116766190	116766690
chr8	123072348	123072848
chr8	123416270	123416770
chr9	4792538	4793038
chr9	20683955	20684455
chr9	37027561	37028061
chr9	83980071	83980571
chr9	95875292	95875792
chr9	101533519	101534019
chr9	122940649	122941149
chr9	127611946	127612446
chr9	127980885	127981385
chr9	129080717	129081217
chr9	136849098	136849598
chr9	137200677	137201177
chr10	25016350	25016850
chr10	28302901	28303401
chr10	73625760	73626260
chr10	74150866	74151366
chr10	77872168	77872668
chr10	102917954	102918454
chr11	10857907	10858407
chr11	43680339	43680839
chr11	47426288	47426788
chr11	62621839	62622339
chr11	64269851	64270351
chr11	64878406	64878906
chr11	64917096	64917596
chr11	65606952	65607452
chr11	66288981	66289481
chr11	66616262	66616762
chr11	66638297	66638797
chr11	66958295	66958795
chr11	68460360	68460860
chr11	72103121	72103621
chr11	73598306	73598806
chr11	73760899	73761399
chr11	73779323	73779823
chr11	106022219	106022719
chr11	111911721	111912221
chr11	115504221	115504721
chr11	119381489	119381989
chr11	126268748	126269248
chr12	6470503	6471003
chr12	39443123	39443623
chr12	46372594	46373094
chr12	50167274	50167774
chr12	53379702	53380202
chr12	53727371	53727871
chr12	55829447	55829947
chr12	56360065	56360565
chr12	57744724	57745224
chr12	64945922	64946422
chr12	82686576	82687076
chr12	89709466	89709966
chr12	98593397	98593897
chr12	106774026	106774526
chr12	107093648	107094148
chr12	113221074	113221574
chr12	118135793	118136293
chr12	122526793	122527293
chr12	123232958	123233458
chr12	129310148	129310648
chr13	26557324	26557824
chr13	28718783	28719283
chr13	42271606	42272106
chr13	51452901	51453401
chr13	99087496	99087996
chr14	24147111	24147611
chr14	35826026	35826526
chr14	49586300	49586800
chr14	54509496	54509996
chr14	58298002	58298502
chr14	73458416	73458916
chr14	74493224	74493724
chr14	77320713	77321213
chr14	81220844	81221344
chr14	90383010	90383510
chr14	101947966	101948466
chr14	105490608	105491108
chr15	42575183	42575683
chr15	43791958	43792458
chr15	45279033	45279533
chr15	64163044	64163544
chr15	73633212	73633712
chr15	92882262	92882762
chr16	2531812	2532312
chr16	2905282	2905782
chr16	3003757	3004257
chr16	4957916	4958416
chr16	5097946	5098446
chr16	27549799	27550299
chr16	28950507	28951007
chr16	29995904	29996404
chr16	30065343	30065843
chr16	30923102	30923602
chr16	30948103	30948603
chr16	46831273	46831773
chr16	53503255	53503755
chr16	57185914	57186414
chr16	74984944	74985444
chr16	81006971	81007471
chr16	81096241	81096741
chr17	3636132	3636632
chr17	5419491	5419991
chr17	7239413	7239913
chr17	19378084	19378584
chr17	21043151	21043651
chr17	30378669	30379169
chr17	44186628	44187128
chr17	47649397	47649897
chr17	48892346	48892846
chr17	50919556	50920056
chr17	59331359	59331859
chr17	60599845	60600345
chr17	60677129	60677629
chr17	64919300	64919800
chr17	76737249	76737749
chr17	81222858	81223358
chr17	82698565	82699065
chr18	21740419	21740919
chr18	51197621	51198121
chr18	79069070	79069570
chr19	506906	507406
chr19	1205347	1205847
chr19	1268932	1269432
chr19	2783223	2783723
chr19	2950525	2951025
chr19	4342538	4343038
chr19	6737368	6737868
chr19	8513666	8514166
chr19	8832660	8833160
chr19	10717435	10717935
chr19	13795019	13795519
chr19	17470031	17470531
chr19	18919318	18919818
chr19	19663536	19664036
chr19	35748160	35748660
chr19	38899587	38900087
chr19	38930578	38931078
chr19	39390961	39391461
chr19	46661008	46661508
chr19	48623971	48624471
chr19	48714135	48714635
chr19	49676652	49677152
chr19	50511115	50511615
chr19	50724653	50725153
chr19	53867501	53868001
chr19	58380826	58381326
chr19	58401065	58401565
chr20	31723408	31723908
chr20	32357909	32358409
chr21	31558940	31559440
chr21	33542687	33543187
chr21	37267375	37267875
chr21	37366446	37366946
chr22	35299890	35300390
chr22	36776153	36776653
chr22	38181655	38182155
chr22	39519953	39520453
chr22	41381579	41382079
chr22	50582735	50583235
chr1	2586244	2586744
chr1	16206457	16206957
chr1	20661332	20661832
chr1	24642834	24643334
chr1	26864951	26865451
chr1	28247028	28247528
chr1	36149374	36149874
chr1	37692057	37692557
chr1	41360888	41361388
chr1	42682050	42682550
chr1	109426277	109426777
chr1	110963760	110964260
chr1	150561229	150561729
chr1	153958471	153958971
chr1	154558732	154559232
chr1	155227376	155227876
chr1	155308483	155308983
chr1	156500612	156501112
chr1	179882003	179882503
chr1	181088395	181088895
chr1	212608383	212608883
chr1	225427929	225428429
chr1	230978699	230979199
chr1	236794939	236795439
chr1	244451773	244452273
chr1	244652802	244653302
chr1	244864378	244864878
chr1	244970494	244970994
chr2	8678668	8679168
chr2	10812611	10813111
chr2	36966472	36966972
chr2	38751190	38751690
chr2	43226436	43226936
chr2	61854345	61854845
chr2	71227143	71227643
chr2	74458051	74458551
chr2	74653987	74654487
chr2	120252497	120252997
chr2	130797901	130798401
chr2	158456594	158457094
chr2	162343761	162344261
chr2	171433919	171434419
chr2	203014365	203014865
chr2	219388046	219388546
chr2	219552178	219552678
chr2	239121465	239121965
chr2	240560909	240561409
chr2	241315558	241316058
chr2	241355889	241356389
chr3	8501458	8501958
chr3	9731060	9731560
chr3	16264866	16265366
chr3	49007014	49007514
chr3	49786362	49786862
chr3	53891633	53892133
chr3	75435379	75435879
chr3	101724658	101725158
chr3	113696548	113697048
chr3	119498222	119498722
chr3	121834899	121835399
chr3	136861859	136862359
chr3	147392092	147392592
chr3	150546376	150546876
chr3	155870227	155870727
chr3	156554961	156555461
chr3	169966493	169966993
chr3	170222131	170222631
chr3	195271404	195271904
chr4	337424	337924
chr4	1289516	1290016
chr4	3955322	3955822
chr4	9691567	9692067
chr4	13484133	13484633
chr4	17687858	17688358
chr4	75514168	75514668
chr4	101347450	101347950
chr4	107989505	107990005
chr4	122732294	122732794
chr4	128287801	128288301
chr4	155758728	155759228
chr4	183658992	183659492
chr5	56909676	56910176
chr5	71587010	71587510
chr5	81971727	81972227
chr5	91280379	91280879
chr5	91380797	91381297
chr5	103258417	103258917
chr5	111512435	111512935
chr5	137754225	137754725
chr5	138337750	138338250
chr5	139403881	139404381
chr5	146203245	146203745
chr5	179559389	179559889
chr5	179732500	179733000
chr6	2245409	2245909
chr6	13615044	13615544
chr6	15504866	15505366
chr6	30066929	30067429
chr6	39296700	39297200
chr6	46652660	46653160
chr6	47309729	47310229
chr6	52284697	52285197
chr6	70413077	70413577
chr6	80106348	80106848
chr6	108559436	108559936
chr6	125749179	125749679
chr6	143843025	143843525
chr6	152982932	152983432
chr6	159789453	159789953
chr7	816298	816798
chr7	66681839	66682339
chr7	73557033	73557533
chr7	73738736	73739236
chr7	75611681	75612181
chr7	92134265	92134765
chr7	99472549	99473049
chr7	99504332	99504832
chr7	106285149	106285649
chr7	107168424	107168924
chr7	120950414	120950914
chr8	9555608	9556108
chr8	55988826	55989326
chr8	66428578	66429078
chr8	101205584	101206084
chr8	108443233	108443733
chr8	134832108	134832608
chr8	140464600	140465100
chr9	2843909	2844409
chr9	4679278	4679778
chr9	34329265	34329765
chr9	35111370	35111870
chr9	35814842	35815342
chr9	37465590	37466090
chr9	81689650	81690150
chr9	113401129	113401629
chr9	122905135	122905635
chr9	125241176	125241676
chr9	127245030	127245530
chr10	12129348	12129848
chr10	24724513	24725013
chr10	31031706	31032206
chr10	68331758	68332258
chr10	69123805	69124305
chr10	70146476	70146976
chr10	70233231	70233731
chr10	80498730	80499230
chr10	100373203	100373703
chr10	102502533	102503033
chr10	119658197	119658697
chr10	123154050	123154550
chr10	131900379	131900879
chr11	47767268	47767768
chr11	63974217	63974717
chr11	65487505	65488005
chr11	66677664	66678164
chr11	72080480	72080980
chr11	74748540	74749040
chr11	77994649	77995149
chr11	85664859	85665359
chr11	121722228	121722728
chr11	124953839	124954339
chr12	949698	950198
chr12	2812381	2812881
chr12	6533699	6534199
chr12	6663070	6663570
chr12	6753384	6753884
chr12	10212175	10212675
chr12	49322783	49323283
chr12	56645856	56646356
chr12	88141994	88142494
chr12	93818919	93819419
chr13	31162134	31162634
chr13	67230164	67230664
chr13	110715338	110715838
chr14	24114448	24114948
chr14	26598204	26598704
chr14	49862701	49863201
chr14	51006717	51007217
chr14	60091663	60092163
chr14	60514713	60515213
chr14	63543207	63543707
chr14	64986895	64987395
chr14	67359652	67360152
chr14	73026929	73027429
chr14	90454276	90454776
chr14	95534704	95535204
chr15	89334678	89335178
chr15	98852237	98852737
chr16	589655	590155
chr16	1943138	1943638
chr16	4616055	4616555
chr16	4802709	4803209
chr16	53703745	53704245
chr16	58629740	58630240
chr16	72008407	72008907
chr16	87950801	87951301
chr17	1628687	1629187
chr17	1684676	1685176
chr17	7214864	7215364
chr17	7251795	7252295
chr17	7931819	7932319
chr17	8138777	8139277
chr17	15999499	15999999
chr17	28952277	28952777
chr17	39980345	39980845
chr17	41918861	41919361
chr17	44200003	44200503
chr17	45161456	45161956
chr17	46193240	46193740
chr17	49764027	49764527
chr17	50867304	50867804
chr17	63550006	63550506
chr17	63621932	63622432
chr17	63842754	63843254
chr17	72343165	72343665
chr17	75456288	75456788
chr17	75855357	75855857
chr18	3447997	3448497
chr18	9136350	9136850
chr18	12377138	12377638
chr18	12947674	12948174
chr18	32470658	32471158
chr18	56638482	56638982
chr18	80034065	80034565
chr19	2096402	2096902
chr19	3572556	3573056
chr19	4065762	4066262
chr19	5680469	5680969
chr19	5977985	5978485
chr19	12938222	12938722
chr19	13952120	13952620
chr19	15418862	15419362
chr19	17303234	17303734
chr19	17859509	17860009
chr19	18152834	18153334
chr19	18192885	18193385
chr19	18281588	18282088
chr19	35757813	35758313
chr19	38335492	38335992
chr19	46860019	46860519
chr19	47515050	47515550
chr19	47600288	47600788
chr19	48720557	48721057
chr19	49487178	49487678
chr19	50658026	50658526
chr20	310336	310836
chr20	44521813	44522313
chr20	44885315	44885815
chr20	49278257	49278757
chr20	62238127	62238627
chr21	33479766	33480266
chr21	36319883	36320383
chr21	42892922	42893422
chr21	46323747	46324247
chr22	20917074	20917574
chr22	21735800	21736300
chr22	29267747	29268247
chr22	30968904	30969404
chr22	36387878	36388378
chr22	38700779	38701279
chr22	42614690	42615190
chr22	46116376	46116876
chrX	3814793	3815293
chr1	1375174	1375674
chr1	1615177	1615677
chr1	7386065	7386565
chr1	10032571	10033071
chr1	16913749	16914249
chr1	31644722	31645222
chr1	36386442	36386942
chr1	42766975	42767475
chr1	43649779	43650279
chr1	43946416	43946916
chr1	45583223	45583723
chr1	48472060	48472560
chr1	54581559	54582059
chr1	58903545	58904045
chr1	65420149	65420649
chr1	67684943	67685443
chr1	84253828	84254328
chr1	94417959	94418459
chr1	119140454	119140954
chr1	147599671	147600171
chr1	150235924	150236424
chr1	153922844	153923344
chr1	161389678	161390178
chr1	201713343	201713843
chr1	201955148	201955648
chr1	226062403	226062903
chr1	235328111	235328611
chr1	235504301	235504801
chr2	28392514	28393014
chr2	42810257	42810757
chr2	43595850	43596350
chr2	46698791	46699291
chr2	47906443	47906943
chr2	61471015	61471515
chr2	73071540	73072040
chr2	85602469	85602969
chr2	96815940	96816440
chr2	105037714	105038214
chr2	105592228	105592728
chr2	113240996	113241496
chr2	128027942	128028442
chr2	171922111	171922611
chr2	190880503	190881003
chr2	207711251	207711751
chr2	207769539	207770039
chr2	219229429	219229929
chr2	223957070	223957570
chr2	241508473	241508973
chr3	17742634	17743134
chr3	23916834	23917334
chr3	41961924	41962424
chr3	42590547	42591047
chr3	43286282	43286782
chr3	48465469	48465969
chr3	48663885	48664385
chr3	57597305	57597805
chr3	64685685	64686185
chr3	66997895	66998395
chr3	100709126	100709626
chr3	130111310	130111810
chr3	134794939	134795439
chr3	141737968	141738468
chr3	143971491	143971991
chr4	674130	674630
chr4	2418601	2419101
chr4	2801023	2801523
chr4	15002030	15002530
chr4	48780178	48780678
chr4	82373922	82374422
chr4	88592117	88592617
chr4	139453532	139454032
chr5	34929211	34929711
chr5	36662244	36662744
chr5	90529480	90529980
chr5	96702455	96702955
chr5	141879058	141879558
chr5	157731493	157731993
chr5	170552636	170553136
chr5	172437548	172438048
chr5	172770950	172771450
chr6	16128736	16129236
chr6	24721103	24721603
chr6	31958810	31959310
chr6	33322922	33323422
chr6	34248882	34249382
chr6	36593979	36594479
chr6	37169709	37170209
chr6	43170930	43171430
chr6	79234518	79235018
chr6	79537273	79537773
chr6	116571062	116571562
chr6	136289671	136290171
chr7	24980003	24980503
chr7	56051406	56051906
chr7	66654241	66654741
chr7	76166424	76166924
chr7	87345260	87345760
chr7	127651700	127652200
chr7	134646445	134646945
chr7	151227052	151227552
chr7	158704659	158705159
chr8	22109492	22109992
chr8	22244816	22245316
chr8	22666681	22667181
chr8	27614570	27615070
chr8	33566978	33567478
chr8	38231305	38231805
chr8	41528876	41529376
chr8	61714444	61714944
chr8	95133464	95133964
chr8	100951866	100952366
chr8	102412647	102413147
chr8	103414917	103415417
chr8	109539376	109539876
chr8	117520416	117520916
chr8	124474416	124474916
chr8	138892572	138893072
chr8	143368506	143369006
chr8	144827200	144827700
chr9	27573547	27574047
chr9	34178735	34179235
chr9	36190595	36191095
chr9	86282341	86282841
chr9	96418243	96418743
chr9	100098887	100099387
chr9	120842722	120843222
chr9	127715494	127715994
chr9	128455765	128456265
chr9	129642000	129642500
chr9	133375976	133376476
chr10	988119	988619
chr10	3107414	3107914
chr10	5889864	5890364
chr10	12068568	12069068
chr10	14878554	14879054
chr10	26860838	26861338
chr10	43408991	43409491
chr10	44959395	44959895
chr10	70403816	70404316
chr10	73811642	73812142
chr10	86521563	86522063
chr10	91923560	91924060
chr10	102642020	102642520
chr10	102714170	102714670
chr10	102743598	102744098
chr10	103918038	103918538
chr10	104232151	104232651
chr10	114043484	114043984
chr10	117804324	117804824
chr10	124916537	124917037
chr11	1309527	1310027
chr11	6481172	6481672
chr11	13277196	13277696
chr11	17077534	17078034
chr11	17276382	17276882
chr11	57324773	57325273
chr11	57667587	57668087
chr11	57712250	57712750
chr11	65570120	65570620
chr11	65711981	65712481
chr11	67239666	67240166
chr11	68121240	68121740
chr11	71448221	71448721
chr11	74170991	74171491
chr11	78188453	78188953
chr11	83285821	83286321
chr11	95789575	95790075
chr11	108664695	108665195
chr11	111601951	111602451
chr11	111926896	111927396
chr12	13000123	13000623
chr12	15882115	15882615
chr12	48198054	48198554
chr12	49110704	49111204
chr12	52192094	52192594
chr12	54279542	54280042
chr12	56117944	56118444
chr12	56688191	56688691
chr12	57546997	57547497
chr12	57752223	57752723
chr12	67268613	67269113
chr12	109713456	109713956
chr12	116737942	116738442
chr12	120317429	120317929
chr12	120495798	120496298
chr12	123269257	123269757
chr12	125049452	125049952
chr12	132908266	132908766
chr13	48532498	48532998
chr13	72781798	72782298
chr13	110870142	110870642
chr14	23285956	23286456
chr14	34462139	34462639
chr14	39174820	39175320
chr14	44961853	44962353
chr14	45134295	45134795
chr14	52729873	52730373
chr14	61762117	61762617
chr14	64540397	64540897
chr14	68979171	68979671
chr14	77097843	77098343
chr14	93115126	93115626
chr14	96502102	96502602
chr14	103385083	103385583
chr15	22838311	22838811
chr15	31326334	31326834
chr15	42920638	42921138
chr15	64841248	64841748
chr15	97960163	97960663
chr15	99733269	99733769
chr16	11915788	11916288
chr16	14630056	14630556
chr16	21502049	21502549
chr16	27203509	27204009
chr16	29790366	29790866
chr16	29973464	29973964
chr16	48393847	48394347
chr16	57244797	57245297
chr16	72093458	72093958
chr17	4710202	4710702
chr17	7484508	7485008
chr17	8152321	8152821
chr17	21287862	21288362
chr17	27332703	27333203
chr17	40287505	40288005
chr17	41688520	41689020
chr17	41786609	41787109
chr17	43483561	43484061
chr17	47970671	47971171
chr17	49788948	49789448
chr17	57488836	57489336
chr17	59155247	59155747
chr17	75046786	75047286
chr17	75515372	75515872
chr17	81238876	81239376
chr17	81512662	81513162
chr17	82037505	82038005
chr18	13726301	13726801
chr18	35240750	35241250
chr18	59359102	59359602
chr19	1020990	1021490
chr19	2841060	2841560
chr19	4723648	4724148
chr19	6279836	6280336
chr19	9834951	9835451
chr19	11090248	11090748
chr19	11346270	11346770
chr19	12551335	12551835
chr19	12793384	12793884
chr19	17075324	17075824
chr19	35740422	35740922
chr19	36014102	36014602
chr19	37317504	37318004
chr19	39970794	39971294
chr19	42396795	42397295
chr19	45001777	45002277
chr19	45584274	45584774
chr19	45995029	45995529
chr19	49639994	49640494
chr19	55461501	55462001
chr20	543584	544084
chr20	3767661	3768161
chr20	5610801	5611301
chr20	18507589	18508089
chr20	24992532	24993032
chr20	33993336	33993836
chr20	41028429	41028929
chr20	41317504	41318004
chr20	45935042	45935542
chr20	45972227	45972727
chr20	50510048	50510548
chr20	57718352	57718852
chr20	58388838	58389338
chr20	62794127	62794627
chr20	63520449	63520949
chr21	42974069	42974569
chr22	27919131	27919631
chr22	37844116	37844616
chr22	40651591	40652091
chr22	40856452	40856952
chr22	41468523	41469023
chr22	45309585	45310085
chr1	5992278	5992778
chr1	6602778	6603278
chr1	12019130	12019630
chr1	16613351	16613851
chr1	22451543	22452043
chr1	23980140	23980640
chr1	28581653	28582153
chr1	36224113	36224613
chr1	36385870	36386370
chr1	36397710	36398210
chr1	42958756	42959256
chr1	44799993	44800493
chr1	46132822	46133322
chr1	51878583	51879083
chr1	93180227	93180727
chr1	109282967	109283467
chr1	121184386	121184886
chr1	153633743	153634243
chr1	155562950	155563450
chr1	156338076	156338576
chr1	156457105	156457605
chr1	156767071	156767571
chr1	164558683	164559183
chr1	167220461	167220961
chr1	179954468	179954968
chr1	203305218	203305718
chr1	205750063	205750563
chr1	207822583	207823083
chr1	212469903	212470403
chr1	241519579	241520079
chr2	9555713	9556213
chr2	12169604	12170104
chr2	20051495	20051995
chr2	23602027	23602527
chr2	54455910	54456410
chr2	69437282	69437782
chr2	74529596	74530096
chr2	97663959	97664459
chr2	112054048	112054548
chr2	135531066	135531566
chr2	144332374	144332874
chr2	152334904	152335404
chr2	159712189	159712689
chr2	197515722	197516222
chr2	219279066	219279566
chr2	231604623	231605123
chr2	231710219	231710719
chr3	4978604	4979104
chr3	14178443	14178943
chr3	50359390	50359890
chr3	120742346	120742846
chr3	121749549	121750049
chr3	123584929	123585429
chr3	129183722	129184222
chr3	132722236	132722736
chr3	147396991	147397491
chr3	157174880	157175380
chr3	188006675	188007175
chr3	194265489	194265989
chr3	194271216	194271716
chr3	197959915	197960415
chr4	124167	124667
chr4	7042905	7043405
chr4	17810564	17811064
chr4	26860461	26860961
chr4	47485020	47485520
chr4	75724232	75724732
chr4	118278442	118278942
chr4	140373327	140373827
chr4	152535899	152536399
chr5	33440609	33441109
chr5	69093676	69094176
chr5	96935684	96936184
chr5	98929330	98929830
chr5	138463958	138464458
chr5	139560987	139561487
chr5	140547384	140547884
chr5	140564170	140564670
chr5	146182545	146183045
chr5	151252707	151253207
chr5	171387487	171387987
chr5	176647108	176647608
chr5	179698549	179699049
chr6	31739618	31740118
chr6	33391352	33391852
chr6	37257468	37257968
chr6	41072221	41072721
chr6	43013770	43014270
chr6	53359195	53359695
chr6	71420657	71421157
chr6	89352581	89353081
chr6	108558330	108558830
chr6	145964187	145964687
chr6	159762103	159762603
chr7	7182240	7182740
chr7	16645539	16646039
chr7	27739834	27740334
chr7	35037292	35037792
chr7	66205010	66205510
chr7	66996438	66996938
chr7	72828024	72828524
chr7	76379847	76380347
chr7	77122218	77122718
chr7	87152171	87152671
chr7	101244579	101245079
chr7	103074628	103075128
chr7	105013415	105013915
chr7	123534404	123534904
chr7	135211368	135211868
chr7	139341495	139341995
chr7	150388824	150389324
chr7	150405098	150405598
chr7	151028137	151028637
chr8	29373086	29373586
chr8	51898994	51899494
chr8	73008545	73009045
chr8	93916514	93917014
chr8	96261642	96262142
chr8	143829155	143829655
chr8	144326690	144327190
chr9	2014942	2015442
chr9	4984545	4985045
chr9	5628758	5629258
chr9	33076468	33076968
chr9	34048708	34049208
chr9	34458442	34458942
chr9	91423747	91424247
chr9	101398449	101398949
chr9	109119785	109120285
chr9	121370082	121370582
chr9	125143371	125143871
chr9	128067822	128068322
chr9	128552233	128552733
chr9	134067831	134068331
chr10	18659079	18659579
chr10	24277772	24278272
chr10	32346104	32346604
chr10	44964085	44964585
chr10	102152026	102152526
chr10	104121722	104122222
chr10	110211019	110211519
chr10	119596916	119597416
chr11	207200	207700
chr11	449974	450474
chr11	568274	568774
chr11	8682444	8682944
chr11	18634276	18634776
chr11	19422196	19422696
chr11	19712521	19713021
chr11	33161329	33161829
chr11	34357839	34358339
chr11	62665014	62665514
chr11	62787100	62787600
chr11	64305160	64305660
chr11	65477358	65477858
chr11	65888312	65888812
chr11	65919063	65919563
chr11	70270374	70270874
chr11	71786823	71787323
chr11	72112159	72112659
chr11	131938070	131938570
chr12	4320882	4321382
chr12	8026464	8026964
chr12	14803308	14803808
chr12	32678991	32679491
chr12	52069438	52069938
chr12	53005937	53006437
chr12	53451778	53452278
chr12	76031400	76031900
chr12	76084541	76085041
chr12	89352284	89352784
chr12	111405551	111406051
chr12	120086933	120087433
chr12	123383786	123384286
chr12	132887484	132887984
chr13	33542330	33542830
chr14	21511192	21511692
chr14	22919088	22919588
chr14	35045985	35046485
chr14	39432654	39433154
chr14	54396673	54397173
chr14	55051366	55051866
chr14	65412351	65412851
chr14	74298918	74299418
chr14	92793847	92794347
chr14	99604142	99604642
chr15	40564892	40565392
chr15	56887001	56887501
chr15	70097706	70098206
chr15	70099507	70100007
chr15	72474010	72474510
chr15	74615481	74615981
chr15	76931373	76931873
chr15	77420081	77420581
chr15	80989705	80990205
chr15	81324033	81324533
chr15	99123575	99124075
chr16	4253673	4254173
chr16	4624440	4624940
chr16	4734165	4734665
chr16	10942300	10942800
chr16	19555295	19555795
chr16	53130677	53131177
chr16	57300451	57300951
chr16	57535879	57536379
chr16	77190580	77191080
chr16	89921621	89922121
chr17	3048772	3049272
chr17	7857326	7857826
chr17	11997270	11997770
chr17	29293934	29294434
chr17	47189093	47189593
chr17	56833736	56834236
chr17	64145626	64146126
chr17	68247653	68248153
chr17	75632952	75633452
chr17	75693584	75694084
chr17	75978963	75979463
chr17	76540743	76541243
chr17	77887569	77888069
chr17	79797109	79797609
chr18	9913659	9914159
chr18	11947100	11947600
chr18	21704598	21705098
chr18	35695764	35696264
chr18	49487031	49487531
chr18	67516632	67517132
chr18	74291836	74292336
chr19	1241462	1241962
chr19	1407186	1407686
chr19	2944818	2945318
chr19	9819047	9819547
chr19	12294666	12295166
chr19	12736952	12737452
chr19	13151629	13152129
chr19	15125569	15126069
chr19	16471829	16472329
chr19	19776284	19776784
chr19	21835990	21836490
chr19	35717358	35717858
chr19	35931431	35931931
chr19	38374417	38374917
chr19	42268187	42268687
chr19	43668545	43669045
chr19	47048496	47048996
chr19	48363948	48364448
chr19	49453250	49453750
chr19	55166460	55166960
chr19	55258817	55259317
chr19	55407953	55408453
chr19	55599375	55599875
chr19	55654219	55654719
chr19	57363169	57363669
chr20	31604117	31604617
chr20	41618230	41618730
chr21	15064786	15065286
chr21	36087352	36087852
chr21	43323271	43323771
chr21	44339067	44339567
chr22	19122277	19122777
chr22	28741660	28742160
chr22	37658238	37658738
chr22	41620961	41621461
chr1	1115956	1116456
chr1	9539071	9539571
chr1	12595795	12596295
chr1	15524323	15524823
chr1	25737059	25737559
chr1	26233862	26234362
chr1	30824302	30824802
chr1	31938239	31938739
chr1	36450269	36450769
chr1	38046717	38047217
chr1	45303491	45303991
chr1	51583478	51583978
chr1	54053230	54053730
chr1	108746371	108746871
chr1	109075817	109076317
chr1	110338254	110338754
chr1	113812150	113812650
chr1	149886508	149887008
chr1	156193723	156194223
chr1	167721669	167722169
chr1	169893744	169894244
chr1	192808707	192809207
chr1	193059254	193059754
chr1	225924097	225924597
chr1	228735139	228735639
chr1	234610804	234611304
chr1	246931748	246932248
chr2	9003763	9004263
chr2	25041827	25042327
chr2	29921466	29921966
chr2	38602852	38603352
chr2	55419763	55420263
chr2	69829340	69829840
chr2	71068045	71068545
chr2	85538843	85539343
chr2	85595388	85595888
chr2	112645550	112646050
chr2	119366689	119367189
chr2	121736734	121737234
chr2	126669744	126670244
chr2	167292695	167293195
chr2	189661103	189661603
chr2	191013993	191014493
chr2	196926518	196927018
chr2	219576721	219577221
chr2	219642404	219642904
chr2	239401408	239401908
chr2	241315029	241315529
chr2	241701749	241702249
chr3	13479912	13480412
chr3	45688967	45689467
chr3	47513216	47513716
chr3	49021798	49022298
chr3	51384850	51385350
chr3	51390871	51391371
chr3	51499791	51500291
chr3	57755953	57756453
chr3	114056337	114056837
chr3	129278584	129279084
chr3	133742405	133742905
chr3	147408972	147409472
chr3	153161928	153162428
chr3	155854314	155854814
chr4	7068027	7068527
chr4	7299042	7299542
chr4	9152460	9152960
chr4	39527412	39527912
chr4	75673211	75673711
chr4	99950114	99950614
chr4	112817797	112818297
chr4	151099346	151099846
chr4	158671917	158672417
chr4	176319605	176320105
chr5	5422039	5422539
chr5	59127550	59128050
chr5	62305918	62306418
chr5	68215408	68215908
chr5	72308206	72308706
chr5	91383153	91383653
chr5	96662722	96663222
chr5	98928782	98929282
chr5	113294729	113295229
chr5	115544551	115545051
chr5	131635094	131635594
chr5	132963418	132963918
chr5	148826269	148826769
chr5	159100167	159100667
chr5	178153794	178154294
chr6	3118405	3118905
chr6	10722786	10723286
chr6	15245459	15245959
chr6	30213220	30213720
chr6	30742563	30743063
chr6	31541798	31542298
chr6	31665704	31666204
chr6	35342260	35342760
chr6	37819165	37819665
chr6	43769875	43770375
chr6	52419928	52420428
chr6	82247553	82248053
chr6	122399257	122399757
chr6	166556930	166557430
chr6	170152255	170152755
chr7	1537122	1537622
chr7	2460519	2461019
chr7	100101278	100101778
chr7	100436328	100436828
chr7	128739017	128739517
chr7	143901978	143902478
chr7	149028493	149028993
chr7	149838010	149838510
chr7	150383793	150384293
chr7	151519863	151520363
chr8	9150528	9151028
chr8	27774214	27774714
chr8	37695380	37695880
chr8	54022129	54022629
chr8	66113086	66113586
chr8	70401904	70402404
chr8	73878687	73879187
chr8	79767704	79768204
chr8	102653772	102654272
chr8	125429640	125430140
chr8	132775051	132775551
chr8	133297076	133297576
chr8	144008333	144008833
chr8	144094652	144095152
chr8	144901362	144901862
chr9	26956118	26956618
chr9	34665848	34666348
chr9	83921279	83921779
chr9	87725773	87726273
chr9	127916855	127917355
chr9	128067133	128067633
chr9	129036251	129036751
chr9	129488469	129488969
chr10	6202621	6203121
chr10	22003516	22004016
chr10	28677170	28677670
chr10	28897693	28898193
chr10	35126541	35127041
chr10	37976472	37976972
chr10	59906370	59906870
chr10	67884372	67884872
chr10	73096756	73097256
chr10	76675930	76676430
chr10	84328293	84328793
chr10	97633269	97633769
chr10	104268842	104269342
chr11	10490545	10491045
chr11	12674012	12674512
chr11	18322012	18322512
chr11	18748836	18749336
chr11	28108027	28108527
chr11	34438609	34439109
chr11	62123625	62124125
chr11	65117584	65118084
chr11	65890297	65890797
chr11	65915648	65916148
chr11	66268203	66268703
chr11	68030310	68030810
chr11	69048581	69049081
chr11	77066644	77067144
chr11	113706166	113706666
chr11	130002289	130002789
chr12	6867234	6867734
chr12	7189354	7189854
chr12	8243339	8243839
chr12	14774044	14774544
chr12	21501450	21501950
chr12	22544033	22544533
chr12	45728698	45729198
chr12	56104216	56104716
chr12	56300222	56300722
chr12	64404038	64404538
chr12	69239266	69239766
chr12	106986939	106987439
chr12	112125225	112125725
chr12	119176303	119176803
chr12	120201000	120201500
chr12	128823777	128824277
chr13	24148739	24149239
chr13	30465735	30466235
chr13	44435062	44435562
chr13	52652450	52652950
chr14	20454848	20455348
chr14	21455954	21456454
chr14	32076587	32077087
chr14	50312049	50312549
chr14	60248829	60249329
chr14	67240947	67241447
chr14	73886461	73886961
chr14	77457443	77457943
chr14	94599153	94599653
chr14	95157353	95157853
chr14	100192805	100193305
chr14	100376113	100376613
chr14	101760385	101760885
chr15	49620681	49621181
chr15	58749703	58750203
chr15	58771002	58771502
chr15	65869198	65869698
chr15	75640018	75640518
chr15	82809334	82809834
chr15	88638514	88639014
chr15	90233780	90234280
chr15	90994427	90994927
chr15	92904107	92904607
chr16	714788	715288
chr16	788289	788789
chr16	3024069	3024569
chr16	15888438	15888938
chr16	30407291	30407791
chr16	30748010	30748510
chr16	31033152	31033652
chr16	58499884	58500384
chr16	68448367	68448867
chr16	87388203	87388703
chr16	89873971	89874471
chr17	1516494	1516994
chr17	2399491	2399991
chr17	3004112	3004612
chr17	7841522	7842022
chr17	17496234	17496734
chr17	17591587	17592087
chr17	28644990	28645490
chr17	28719419	28719919
chr17	35809176	35809676
chr17	40099058	40099558
chr17	42676887	42677387
chr17	45317029	45317529
chr17	73311824	73312324
chr17	76569882	76570382
chr17	79839250	79839750
chr18	50281523	50282023
chr18	70205778	70206278
chr19	1240070	1240570
chr19	1249478	1249978
chr19	2059803	2060303
chr19	2427397	2427897
chr19	2546451	2546951
chr19	3505894	3506394
chr19	6110388	6110888
chr19	11155678	11156178
chr19	12791163	12791663
chr19	14006147	14006647
chr19	16628118	16628618
chr19	17309193	17309693
chr19	36115109	36115609
chr19	47112952	47113452
chr19	48619106	48619606
chr19	48637441	48637941
chr19	48964971	48965471
chr19	49118912	49119412
chr19	50025273	50025773
chr19	54448894	54449394
chr19	56314362	56314862
chr19	58440112	58440612
chr20	17968361	17968861
chr20	34704459	34704959
chr20	35771727	35772227
chr20	50730967	50731467
chr22	24555055	24555555
chr22	33920808	33921308
chr22	38755802	38756302
chr22	41286109	41286609
chr22	48702539	48703039
chrX	154379008	154379508
chr1	10398693	10399193
chr1	11262400	11262900
chr1	16217300	16217800
chr1	17053884	17054384
chr1	24745056	24745556
chr1	32817274	32817774
chr1	36150746	36151246
chr1	38859546	38860046
chr1	44355097	44355597
chr1	45686912	45687412
chr1	53945750	53946250
chr1	117121598	117122098
chr1	151790325	151790825
chr1	154220355	154220855
chr1	173476883	173477383
chr1	182114167	182114667
chr1	213987657	213988157
chr1	225999264	225999764
chr1	236281831	236282331
chr1	246566091	246566591
chr2	3558150	3558650
chr2	8681732	8682232
chr2	11863628	11864128
chr2	20617842	20618342
chr2	20650916	20651416
chr2	27212038	27212538
chr2	54330562	54331062
chr2	60881302	60881802
chr2	61764116	61764616
chr2	63840653	63841153
chr2	158968338	158968838
chr2	173965174	173965674
chr2	189784155	189784655
chr2	218568259	218568759
chr2	224039393	224039893
chr2	241734316	241734816
chr3	9792781	9793281
chr3	13895287	13895787
chr3	14651408	14651908
chr3	42581795	42582295
chr3	48439946	48440446
chr3	52410108	52410608
chr3	57017477	57017977
chr3	61251251	61251751
chr3	119702737	119703237
chr3	128680561	128681061
chr3	139389498	139389998
chr3	157160016	157160516
chr3	167734763	167735263
chr3	193831453	193831953
chr3	194486744	194487244
[truncated: 136,014 more rows]

## Sheet: BC peakSet
The genomic coordinates of the peaks in BC class
Chromosome	Start	End
chr1	6613339	6613839
chr1	9910285	9910785
chr1	10210210	10210710
chr1	15524308	15524808
chr1	16904680	16905180
chr1	16913739	16914239
chr1	27725589	27726089
chr1	40040332	40040832
chr1	58783831	58784331
chr1	70410861	70411361
chr1	109984417	109984917
chr1	151281879	151282379
chr1	156500662	156501162
chr1	156767062	156767562
chr1	160098797	160099297
chr1	172532727	172533227
chr1	184754734	184755234
chr1	207867289	207867789
chr1	212285048	212285548
chr1	228139787	228140287
chr1	228165424	228165924
chr1	235504315	235504815
chr1	244652583	244653083
chr2	9630844	9631344
chr2	20446725	20447225
chr2	30146433	30146933
chr2	44168295	44168795
chr2	54723226	54723726
chr2	64750874	64751374
chr2	65129983	65130483
chr2	69914407	69914907
chr2	112275241	112275741
chr2	144332373	144332873
chr2	152717293	152717793
chr2	177212290	177212790
chr2	178451015	178451515
chr2	192194805	192195305
chr2	197453146	197453646
chr2	207166054	207166554
chr2	218270170	218270670
chr2	219543680	219544180
chr2	239401053	239401553
chr3	9731078	9731578
chr3	14948234	14948734
chr3	31532277	31532777
chr3	33440287	33440787
chr3	50299276	50299776
chr3	105868783	105869283
chr3	125915780	125916280
chr3	160755218	160755718
chr3	195442866	195443366
chr4	781728	782228
chr4	1346849	1347349
chr4	2261965	2262465
chr4	2536143	2536643
chr4	3074303	3074803
chr4	6269466	6269966
chr4	37686241	37686741
chr4	51842734	51843234
chr4	75724263	75724763
chr4	87006643	87007143
chr4	101347454	101347954
chr4	148442375	148442875
chr4	165327131	165327631
chr4	173334280	173334780
chr4	173370568	173371068
chr4	185396323	185396823
chr5	34929184	34929684
chr5	41903950	41904450
chr5	43121252	43121752
chr5	61331878	61332378
chr5	69093651	69094151
chr5	81750900	81751400
chr5	91379996	91380496
chr5	91380811	91381311
chr5	108748516	108749016
chr5	115544537	115545037
chr5	127030368	127030868
chr5	138464840	138465340
chr5	140401268	140401768
chr5	151771253	151771753
chr5	173887916	173888416
chr5	176647105	176647605
chr6	32195568	32196068
chr6	43013756	43014256
chr6	52995085	52995585
chr6	63572178	63572678
chr6	89080421	89080921
chr6	151452038	151452538
chr6	166627047	166627547
chr7	1459425	1459925
chr7	7640404	7640904
chr7	30284202	30284702
chr7	35800794	35801294
chr7	36152784	36153284
chr7	44606581	44607081
chr7	66628569	66629069
chr7	75738948	75739448
chr7	76317972	76318472
chr7	76359064	76359564
chr7	77696086	77696586
chr7	105012857	105013357
chr7	107168420	107168920
chr7	108525995	108526495
chr7	120950405	120950905
chr7	127651747	127652247
chr7	129224590	129225090
chr7	150379010	150379510
chr7	151057790	151058290
chr7	155297487	155297987
chr7	158829350	158829850
chr8	25458309	25458809
chr8	28889941	28890441
chr8	30082918	30083418
chr8	66667095	66667595
chr8	92965464	92965964
chr8	100721933	100722433
chr8	100951848	100952348
chr8	123274447	123274947
chr8	123416277	123416777
chr9	34989326	34989826
chr9	71911006	71911506
chr9	72365106	72365606
chr9	79571509	79572009
chr9	92764756	92765256
chr9	94165840	94166340
chr9	100098891	100099391
chr9	120714324	120714824
chr9	128067816	128068316
chr9	131289169	131289669
chr9	136790689	136791189
chr9	137240905	137241405
chr10	3172626	3173126
chr10	44978583	44979083
chr10	72273599	72274099
chr10	74826045	74826545
chr10	78303162	78303662
chr10	102917948	102918448
chr10	110919068	110919568
chr10	118754886	118755386
chr10	132537241	132537741
chr11	3797445	3797945
chr11	6234641	6235141
chr11	9460554	9461054
chr11	45847156	45847656
chr11	62831896	62832396
chr11	64241134	64241634
chr11	83156553	83157053
chr11	95231198	95231698
chr11	106022168	106022668
chr11	106077180	106077680
chr11	115504200	115504700
chr11	123062346	123062846
chr11	125592461	125592961
chr11	130069521	130070021
chr12	26114133	26114633
chr12	26938150	26938650
chr12	53079249	53079749
chr12	53379578	53380078
chr12	55973658	55974158
chr12	57752239	57752739
chr12	82686590	82687090
chr12	89709470	89709970
chr12	92145679	92146179
chr12	98593365	98593865
chr12	109713410	109713910
chr12	113221041	113221541
chr12	122225931	122226431
chr13	19863600	19864100
chr13	19958343	19958843
chr13	27620402	27620902
chr13	35476509	35477009
chr13	44141807	44142307
chr13	49443890	49444390
chr13	49936191	49936691
chr13	51452881	51453381
chr13	51584153	51584653
chr13	67230162	67230662
chr13	97433167	97433667
chr13	102596657	102597157
chr14	44961866	44962366
chr14	49862697	49863197
chr14	52552391	52552891
chr14	75294032	75294532
chr14	90383013	90383513
chr14	99480985	99481485
chr14	101947913	101948413
chr15	33194542	33195042
chr15	43791935	43792435
chr16	1782506	1783006
chr16	2905644	2906144
chr16	9091246	9091746
chr16	21520248	21520748
chr16	22190732	22191232
chr16	28950543	28951043
chr16	30658117	30658617
chr16	30922444	30922944
chr16	50741641	50742141
chr16	53503175	53503675
chr16	56931835	56932335
chr16	67806464	67806964
chr16	68448381	68448881
chr16	75517183	75517683
chr17	1716133	1716633
chr17	7572435	7572935
chr17	21284320	21284820
chr17	42388375	42388875
chr17	47895779	47896279
chr17	56833747	56834247
chr17	64919296	64919796
chr17	81238896	81239396
chr17	82022844	82023344
chr18	9136336	9136836
chr18	9475099	9475599
chr18	12377233	12377733
chr18	21740426	21740926
chr18	50287697	50288197
chr18	62522724	62523224
chr18	62714893	62715393
chr18	67516613	67517113
chr19	4968718	4969218
chr19	7829773	7830273
chr19	10870874	10871374
chr19	13952058	13952558
chr19	18203875	18204375
chr19	18522021	18522521
chr19	19063574	19064074
chr19	19385405	19385905
chr19	19776282	19776782
chr19	32675002	32675502
chr19	40465682	40466182
chr19	40750410	40750910
chr19	42268532	42269032
chr19	46661218	46661718
chr19	47048486	47048986
chr19	48468918	48469418
chr19	49641801	49642301
chr19	49676630	49677130
chr19	49766410	49766910
chr19	50658048	50658548
chr19	54136969	54137469
chr19	54190587	54191087
chr19	55339209	55339709
chr20	2101817	2102317
chr20	17682167	17682667
chr20	33993000	33993500
chr21	14383035	14383535
chr21	28992723	28993223
chr21	36156272	36156772
chr21	42496128	42496628
chr21	42974048	42974548
chr21	45863364	45863864
chr22	35299894	35300394
chr22	36387864	36388364
chr22	40636536	40637036
chr22	41589791	41590291
chr22	43015005	43015505
chr22	46035658	46036158
chr1	1115967	1116467
chr1	1375121	1375621
chr1	3900531	3901031
chr1	6785083	6785583
chr1	7704398	7704898
chr1	7961285	7961785
chr1	10032493	10032993
chr1	30718190	30718690
chr1	32394332	32394832
chr1	41360881	41361381
chr1	44674341	44674841
chr1	67684875	67685375
chr1	110339070	110339570
chr1	110963767	110964267
chr1	150629026	150629526
chr1	171781167	171781667
chr1	174799389	174799889
chr1	180631672	180632172
chr1	182604187	182604687
chr1	185156914	185157414
chr1	186375169	186375669
chr1	205227637	205228137
chr1	211579074	211579574
chr1	221741969	221742469
chr1	230978728	230979228
chr1	232629902	232630402
chr1	234610815	234611315
chr1	243255635	243256135
chr1	244451779	244452279
chr2	676651	677151
chr2	10812625	10813125
chr2	26345690	26346190
chr2	27050946	27051446
chr2	27370311	27370811
chr2	36966486	36966986
chr2	42810295	42810795
chr2	48314106	48314606
chr2	55050341	55050841
chr2	55419659	55420159
chr2	61538164	61538664
chr2	62705363	62705863
chr2	68252418	68252918
chr2	74653954	74654454
chr2	85772207	85772707
chr2	96857892	96858392
chr2	112645530	112646030
chr2	130342536	130343036
chr2	170928866	170929366
chr2	197499695	197500195
chr2	200864468	200864968
chr2	207711256	207711756
chr2	218963155	218963655
chr2	219229440	219229940
chr2	226801000	226801500
chr2	231514161	231514661
chr2	231706904	231707404
chr2	231708072	231708572
chr2	238060604	238061104
chr3	9397219	9397719
chr3	17742382	17742882
chr3	23945826	23946326
chr3	38024858	38025358
chr3	38136992	38137492
chr3	40453050	40453550
chr3	48556648	48557148
chr3	49786389	49786889
chr3	50235812	50236312
chr3	51941833	51942333
chr3	75434990	75435490
chr3	108222252	108222752
chr3	115147112	115147612
chr3	123584872	123585372
chr3	128680574	128681074
chr3	131381398	131381898
chr3	136752192	136752692
chr3	150546310	150546810
chr3	167734903	167735403
chr3	184174440	184174940
chr3	186108986	186109486
chr3	186570313	186570813
chr4	337405	337905
chr4	7067988	7068488
chr4	8158699	8159199
chr4	9152813	9153313
chr4	15002147	15002647
chr4	26860497	26860997
chr4	39527371	39527871
chr4	48341131	48341631
chr4	48780182	48780682
chr4	82284753	82285253
chr4	83034816	83035316
chr4	88284495	88284995
chr4	98658495	98658995
chr4	99950250	99950750
chr4	102868711	102869211
chr4	107720155	107720655
chr4	118278393	118278893
chr4	152535892	152536392
chr4	155758700	155759200
chr4	162163800	162164300
chr4	165112674	165113174
chr4	165378794	165379294
chr4	169620165	169620665
chr4	170026233	170026733
chr4	176319606	176320106
chr4	184649370	184649870
chr5	32312788	32313288
chr5	33440611	33441111
chr5	57173531	57174031
chr5	58582777	58583277
chr5	75336765	75337265
chr5	88141293	88141793
chr5	88660918	88661418
chr5	90558389	90558889
chr5	91383221	91383721
chr5	96935666	96936166
chr5	109409847	109410347
chr5	119070793	119071293
chr5	132866285	132866785
chr5	137754200	137754700
chr5	146182478	146182978
chr5	146203256	146203756
chr5	149960445	149960945
chr5	151252726	151253226
chr5	154754812	154755312
chr5	160119375	160119875
chr5	168579500	168580000
chr5	173056955	173057455
chr5	177426214	177426714
chr5	179732439	179732939
chr6	2765089	2765589
chr6	11537273	11537773
chr6	16128774	16129274
chr6	24721050	24721550
chr6	31815282	31815782
chr6	52284717	52285217
chr6	62286014	62286514
chr6	73653806	73654306
chr6	79078311	79078811
chr6	85643094	85643594
chr6	85678543	85679043
chr6	93419445	93419945
chr6	99425174	99425674
chr6	108558350	108558850
chr6	111873243	111873743
chr6	116279711	116280211
chr6	118893741	118894241
chr6	132814176	132814676
chr6	142946173	142946673
chr6	151390288	151390788
chr6	152982944	152983444
chr7	2844168	2844668
chr7	7968461	7968961
chr7	21427158	21427658
chr7	21427742	21428242
chr7	23013935	23014435
chr7	25125167	25125667
chr7	44847986	44848486
chr7	55366051	55366551
chr7	77122216	77122716
chr7	77536712	77537212
chr7	77798460	77798960
chr7	87152156	87152656
chr7	100148554	100149054
chr7	100538811	100539311
chr7	100586261	100586761
chr7	112206178	112206678
chr7	112450099	112450599
chr7	112939611	112940111
chr7	129952706	129953206
chr7	138001991	138002491
chr7	139359535	139360035
chr7	158704709	158705209
chr8	17922464	17922964
chr8	26383063	26383563
chr8	28401837	28402337
chr8	38996447	38996947
chr8	51898984	51899484
chr8	64376944	64377444
chr8	70401910	70402410
chr8	70805164	70805664
chr8	73972032	73972532
chr8	101205630	101206130
chr8	102238992	102239492
chr8	103414937	103415437
chr8	124474521	124475021
chr8	134832105	134832605
chr8	143609462	143609962
chr8	144827085	144827585
chr8	144901346	144901846
chr9	2014937	2015437
chr9	6681093	6681593
chr9	20683964	20684464
chr9	33264568	33265068
chr9	35657724	35658224
chr9	89310589	89311089
chr9	90642667	90643167
chr9	96449845	96450345
chr9	99821535	99822035
chr9	113221204	113221704
chr9	113401179	113401679
chr9	120842762	120843262
chr9	125143375	125143875
chr9	127245014	127245514
chr9	127396693	127397193
chr9	136886145	136886645
chr9	137200631	137201131
chr10	3785149	3785649
chr10	12068577	12069077
chr10	22003537	22004037
chr10	24724397	24724897
chr10	25016312	25016812
chr10	31760023	31760523
chr10	37976508	37977008
chr10	68331705	68332205
chr10	69123804	69124304
chr10	70170347	70170847
chr10	72297842	72298342
chr10	95561213	95561713
chr10	102501986	102502486
chr10	102503636	102504136
chr11	1389453	1389953
chr11	2400070	2400570
chr11	10808754	10809254
chr11	10857910	10858410
chr11	13668194	13668694
chr11	33161357	33161857
chr11	59615639	59616139
chr11	64185778	64186278
chr11	64269839	64270339
chr11	64305093	64305593
chr11	64778585	64779085
chr11	65615212	65615712
chr11	66958256	66958756
chr11	73597996	73598496
chr11	76782898	76783398
chr11	83071627	83072127
chr11	83286121	83286621
chr11	86068964	86069464
chr11	108222553	108223053
chr11	111926954	111927454
chr11	117098355	117098855
chr11	119121147	119121647
chr11	119381471	119381971
chr11	126268754	126269254
chr11	130002279	130002779
chr11	133956761	133957261
chr11	134253217	134253717
chr12	2812360	2812860
chr12	3292976	3293476
chr12	6852183	6852683
chr12	45728736	45729236
chr12	49707369	49707869
chr12	50111562	50112062
chr12	50167239	50167739
chr12	52032820	52033320
chr12	53451722	53452222
chr12	53500675	53501175
chr12	53727350	53727850
chr12	55817583	55818083
chr12	57078641	57079141
chr12	71663702	71664202
chr12	79934980	79935480
chr12	88141963	88142463
chr12	95217365	95217865
chr12	96035469	96035969
chr12	106774310	106774810
chr12	118372738	118373238
chr13	26557331	26557831
chr13	28718802	28719302
chr13	30617527	30618027
chr13	31162131	31162631
chr13	45340998	45341498
chr13	100674694	100675194
chr13	110712937	110713437
chr13	110914934	110915434
chr14	20461467	20461967
chr14	21269479	21269979
chr14	22929310	22929810
chr14	23301612	23302112
chr14	23320944	23321444
chr14	24114493	24114993
chr14	24141354	24141854
chr14	45134308	45134808
chr14	50312014	50312514
chr14	51094937	51095437
chr14	59188288	59188788
chr14	73458426	73458926
chr14	74084344	74084844
chr14	74493207	74493707
chr14	77321158	77321658
chr14	77616553	77617053
chr14	92793846	92794346
chr14	99683821	99684321
chr14	103715385	103715885
chr14	104752728	104753228
chr15	31326319	31326819
chr15	45279053	45279553
chr15	58770957	58771457
chr15	73633156	73633656
chr15	74598184	74598684
chr15	76931406	76931906
chr15	89088106	89088606
chr16	589322	589822
chr16	2155268	2155768
chr16	2223202	2223702
chr16	2882488	2882988
chr16	4616142	4616642
chr16	5097960	5098460
chr16	18801460	18801960
chr16	19555302	19555802
chr16	20900232	20900732
chr16	21502056	21502556
chr16	30378098	30378598
chr16	30923075	30923575
chr16	81096223	81096723
chr16	84504503	84505003
chr16	88856788	88857288
chr17	3636129	3636629
chr17	4967164	4967664
chr17	14309214	14309714
chr17	17972358	17972858
chr17	18039062	18039562
chr17	19378094	19378594
chr17	21043164	21043664
chr17	28041387	28041887
chr17	28335340	28335840
chr17	29293939	29294439
chr17	44186545	44187045
chr17	46193246	46193746
chr17	46193816	46194316
chr17	48047891	48048391
chr17	50866250	50866750
chr17	58517755	58518255
chr17	63621866	63622366
chr17	63773499	63773999
chr17	75289253	75289753
chr17	75855284	75855784
chr17	76671567	76672067
chr17	77958234	77958734
chr17	81222856	81223356
chr18	32092247	32092747
chr18	32470761	32471261
chr18	51197638	51198138
chr18	59139514	59140014
chr18	74291867	74292367
chr18	74495948	74496448
chr18	76492741	76493241
chr18	79068937	79069437
chr18	79679209	79679709
chr19	680310	680810
chr19	797019	797519
chr19	1268912	1269412
chr19	1490745	1491245
chr19	2096400	2096900
chr19	4402199	4402699
chr19	4791312	4791812
chr19	8389991	8390491
chr19	9834895	9835395
chr19	10717735	10718235
chr19	11374785	11375285
chr19	11435017	11435517
chr19	14117618	14118118
chr19	14136685	14137185
chr19	14518383	14518883
chr19	14529190	14529690
chr19	16659972	16660472
chr19	19663540	19664040
chr19	20052023	20052523
chr19	35931431	35931931
chr19	38335511	38336011
chr19	38850138	38850638
chr19	44890735	44891235
chr19	45178130	45178630
chr19	45995099	45995599
chr19	48714108	48714608
chr19	48993237	48993737
chr19	49877146	49877646
chr19	50724637	50725137
chr19	54159656	54160156
chr19	54190011	54190511
chr20	3888989	3889489
chr20	5126631	5127131
chr20	5610776	5611276
chr20	23361834	23362334
chr20	32357923	32358423
chr20	62794069	62794569
chr21	33641571	33642071
chr21	33642091	33642591
chr21	36319877	36320377
chr21	37267358	37267858
chr22	19122298	19122798
chr22	29603224	29603724
chr22	41286082	41286582
chr22	42079384	42079884
chrX	15854658	15855158
chr1	2227606	2228106
chr1	3901167	3901667
chr1	9539078	9539578
chr1	10398683	10399183
chr1	16921628	16922128
chr1	23344202	23344702
chr1	30824343	30824843
chr1	32817277	32817777
chr1	36149401	36149901
chr1	36385838	36386338
chr1	42766937	42767437
chr1	44800003	44800503
chr1	45303443	45303943
chr1	45686896	45687396
chr1	53945713	53946213
chr1	54406225	54406725
chr1	59814549	59815049
chr1	85276416	85276916
chr1	89994838	89995338
chr1	150235894	150236394
chr1	150876540	150877040
chr1	167220448	167220948
chr1	169485825	169486325
chr1	174999624	175000124
chr1	201170610	201171110
chr1	202348342	202348842
chr1	207822587	207823087
chr1	226939892	226940392
chr1	241519556	241520056
chr1	248838025	248838525
chr2	10344059	10344559
chr2	24971786	24972286
chr2	25041837	25042337
chr2	70142475	70142975
chr2	73071565	73072065
chr2	74458028	74458528
chr2	85433611	85434111
chr2	85538835	85539335
chr2	96265867	96266367
chr2	97663832	97664332
chr2	111120559	111121059
chr2	112054052	112054552
chr2	128027159	128027659
chr2	135531133	135531633
chr2	152718291	152718791
chr2	158456634	158457134
chr2	178194201	178194701
chr2	181680371	181680871
chr2	190880481	190880981
chr2	203014409	203014909
chr2	209423726	209424226
chr2	218959377	218959877
chr2	219279058	219279558
chr2	222860684	222861184
chr2	231781078	231781578
chr2	240820105	240820605
chr2	241315116	241315616
chr3	9396527	9397027
chr3	13479934	13480434
chr3	25664720	25665220
chr3	27484284	27484784
chr3	38164897	38165397
chr3	48663879	48664379
chr3	52057229	52057729
chr3	66997903	66998403
chr3	84958676	84959176
chr3	98522706	98523206
chr3	98901601	98902101
chr3	100401206	100401706
chr3	120742340	120742840
chr3	150762974	150763474
chr3	156674266	156674766
chr3	170222135	170222635
chr3	172750421	172750921
chr3	197736716	197737216
chr4	473984	474484
chr4	7042912	7043412
chr4	26319401	26319901
chr4	39977415	39977915
chr4	83012785	83013285
chr4	99563532	99564032
chr4	102827827	102828327
chr4	107989492	107989992
chr4	119212391	119212891
chr4	129093398	129093898
chr4	139015210	139015710
chr4	140523828	140524328
chr4	145180426	145180926
chr4	158671957	158672457
chr4	164383789	164384289
chr4	183504344	183504844
chr4	183658998	183659498
chr4	185142955	185143455
chr5	693178	693678
chr5	5422013	5422513
chr5	34007819	34008319
chr5	79514329	79514829
chr5	128082868	128083368
chr5	128083402	128083902
chr5	131796894	131797394
chr5	134225862	134226362
chr5	141041003	141041503
chr5	176416376	176416876
chr5	176619107	176619607
chr5	178153827	178154327
chr5	179559372	179559872
chr6	2245394	2245894
chr6	20401310	20401810
chr6	31620228	31620728
chr6	31665685	31666185
chr6	33322863	33323363
chr6	36594006	36594506
chr6	37819161	37819661
chr6	44246785	44247285
chr6	53547826	53548326
chr6	73520957	73521457
chr6	88963480	88963980
chr6	108559503	108560003
chr6	110179821	110180321
chr6	110874473	110874973
chr7	6104444	6104944
chr7	16645539	16646039
chr7	26200676	26201176
chr7	27662751	27663251
chr7	30504664	30505164
chr7	38177907	38178407
chr7	44082396	44082896
chr7	64307113	64307613
chr7	66075518	66076018
chr7	73522115	73522615
chr7	73738732	73739232
chr7	74657256	74657756
chr7	99504665	99505165
chr7	100612178	100612678
chr7	106284847	106285347
chr7	108569544	108570044
chr7	134646478	134646978
chr7	135211358	135211858
chr7	139340299	139340799
chr7	140696420	140696920
chr7	149028583	149029083
chr7	151028042	151028542
chr7	151227057	151227557
chr7	151519852	151520352
chr7	152463682	152464182
chr8	9555599	9556099
chr8	11802414	11802914
chr8	28622427	28622927
chr8	42152592	42153092
chr8	56211223	56211723
chr8	60516624	60517124
chr8	61714439	61714939
chr8	66428573	66429073
chr8	93916650	93917150
chr8	102864039	102864539
chr8	109334003	109334503
chr8	109539478	109539978
chr8	125429789	125430289
chr8	142726905	142727405
chr9	4792517	4793017
chr9	5437680	5438180
chr9	27573235	27573735
chr9	34048984	34049484
chr9	35072483	35072983
chr9	35111459	35111959
chr9	91423715	91424215
chr9	97633272	97633772
chr9	101398436	101398936
chr9	101533525	101534025
chr9	109119814	109120314
chr9	111631044	111631544
chr9	122905155	122905655
chr9	125241324	125241824
chr9	127608245	127608745
chr9	127980891	127981391
chr9	128067189	128067689
chr9	129080763	129081263
chr10	931584	932084
chr10	1048726	1049226
chr10	31031696	31032196
chr10	32346124	32346624
chr10	73811673	73812173
chr10	75402081	75402581
chr10	79274722	79275222
chr10	97687188	97687688
chr10	99620313	99620813
chr10	100912630	100913130
chr10	102502622	102503122
chr10	102641995	102642495
chr10	110497576	110498076
chr10	119596904	119597404
chr10	119725691	119726191
chr11	3378977	3379477
chr11	18634240	18634740
chr11	33774328	33774828
chr11	34916313	34916813
chr11	47767258	47767758
chr11	57667647	57668147
chr11	62621836	62622336
chr11	62753997	62754497
chr11	65314550	65315050
chr11	66288981	66289481
chr11	72112182	72112682
chr11	73760998	73761498
chr11	73779331	73779831
chr11	75525738	75526238
chr11	75814871	75815371
chr11	77066659	77067159
chr11	77994658	77995158
chr11	107590904	107591404
chr11	113314279	113314779
chr11	118909123	118909623
chr11	119095282	119095782
chr11	126062715	126063215
chr12	3213105	3213605
chr12	6663050	6663550
chr12	12266771	12267271
chr12	13000133	13000633
chr12	25250904	25251404
chr12	39443097	39443597
chr12	45990512	45991012
chr12	46268816	46269316
chr12	48682106	48682606
chr12	49110704	49111204
chr12	53625868	53626368
chr12	57846876	57847376
chr12	67269058	67269558
chr12	76559622	76560122
chr12	78864357	78864857
chr12	82358289	82358789
chr12	84912585	84913085
chr12	103929840	103930340
chr12	105235920	105236420
chr12	107093367	107093867
chr12	110583135	110583635
chr12	111405568	111406068
chr12	112125200	112125700
chr12	123097647	123098147
chr13	26253882	26254382
chr13	42271598	42272098
chr13	44436627	44437127
chr13	50124228	50124728
chr13	52450453	52450953
chr13	60163770	60164270
chr13	77326864	77327364
chr13	95676838	95677338
chr13	97976210	97976710
chr13	109786389	109786889
chr13	110715245	110715745
chr14	20343117	20343617
chr14	20682563	20683063
chr14	21103788	21104288
chr14	21476832	21477332
chr14	23285925	23286425
chr14	23512823	23513323
chr14	24147111	24147611
chr14	31457191	31457691
chr14	32076627	32077127
chr14	32203339	32203839
chr14	35826020	35826520
chr14	60091670	60092170
chr14	64503647	64504147
chr14	75258917	75259417
chr14	77028478	77028978
chr14	77097984	77098484
chr14	81533781	81534281
chr14	90396705	90397205
chr14	91060449	91060949
chr14	99604134	99604634
chr14	100238489	100238989
chr15	39782319	39782819
chr15	64163038	64163538
chr15	65611019	65611519
chr15	75451565	75452065
chr15	81324059	81324559
chr15	89334654	89335154
chr15	92882245	92882745
chr15	97960267	97960767
chr15	99251078	99251578
chr15	99733281	99733781
chr16	4253770	4254270
chr16	10743932	10744432
chr16	11742695	11743195
chr16	22297042	22297542
chr16	27549807	27550307
chr16	30065395	30065895
chr16	30370558	30371058
chr16	53703715	53704215
chr16	57735371	57735871
chr16	67660569	67661069
chr16	74984947	74985447
chr16	75464571	75465071
chr16	87492870	87493370
chr17	7650625	7651125
chr17	7931828	7932328
chr17	8630737	8631237
chr17	47970678	47971178
chr17	49764015	49764515
chr17	59331384	59331884
chr17	60599821	60600321
chr17	74872827	74873327
chr17	75456288	75456788
chr17	82458358	82458858
chr18	12947655	12948155
chr18	50878822	50879322
chr18	59359151	59359651
chr18	62186896	62187396
chr18	80033948	80034448
chr19	3505938	3506438
chr19	4065777	4066277
chr19	4471752	4472252
chr19	6424728	6425228
chr19	6737354	6737854
chr19	7943625	7944125
chr19	8412933	8413433
chr19	8832601	8833101
chr19	11597147	11597647
chr19	11738803	11739303
chr19	12333515	12334015
chr19	12551345	12551845
chr19	12938204	12938704
chr19	17470041	17470541
chr19	18281408	18281908
chr19	35748238	35748738
chr19	38229583	38230083
chr19	38374403	38374903
chr19	39342040	39342540
chr19	45584245	45584745
chr19	49118972	49119472
chr19	49876468	49876968
chr19	50328997	50329497
chr19	50511033	50511533
chr19	55461564	55462064
chr19	56507477	56507977
chr20	310340	310840
chr20	35742117	35742617
chr20	41618264	41618764
chr20	50510035	50510535
chr20	50731017	50731517
chr20	62238073	62238573
chr21	17819405	17819905
chr21	25734776	25735276
chr21	33542658	33543158
chr21	42892897	42893397
chr22	20917035	20917535
chr22	21641915	21642415
chr22	33920826	33921326
chr22	36776174	36776674
chr22	38705353	38705853
chr22	41091387	41091887
chr22	41448252	41448752
chr22	49918314	49918814
chr22	50582718	50583218
chrX	3814801	3815301
chrX	16786020	16786520
chrX	20141728	20142228
chr1	2189485	2189985
chr1	2391413	2391913
chr1	6579713	6580213
chr1	8817482	8817982
chr1	11262436	11262936
chr1	18956599	18957099
chr1	25430016	25430516
chr1	25616380	25616880
chr1	28259181	28259681
chr1	29181765	29182265
chr1	31938236	31938736
chr1	42682061	42682561
chr1	46132420	46132920
chr1	48472001	48472501
chr1	54053217	54053717
chr1	95072431	95072931
chr1	113812193	113812693
chr1	113904921	113905421
chr1	145957827	145958327
chr1	149886463	149886963
chr1	151716667	151717167
chr1	153922829	153923329
chr1	153958413	153958913
chr1	156193722	156194222
chr1	167936316	167936816
chr1	179954474	179954974
chr1	192808691	192809191
chr1	205750054	205750554
chr1	212608333	212608833
chr1	223992356	223992856
chr1	244864316	244864816
chr2	26785672	26786172
chr2	42361338	42361838
chr2	46698809	46699309
chr2	47176261	47176761
chr2	55617490	55617990
chr2	60881281	60881781
chr2	61764141	61764641
chr2	63588655	63589155
chr2	65056031	65056531
chr2	74002419	74002919
chr2	74529554	74530054
chr2	88691358	88691858
chr2	112054918	112055418
chr2	148874948	148875448
chr2	171433934	171434434
chr2	172555730	172556230
chr2	173965187	173965687
chr2	190319687	190320187
chr2	191677748	191678248
chr2	195656820	195657320
chr2	197515724	197516224
chr2	207529681	207530181
chr2	216081604	216082104
chr2	218395927	218396427
chr2	219388205	219388705
chr2	221572154	221572654
chr2	226791506	226792006
chr2	231464280	231464780
chr2	231604562	231605062
chr2	237966580	237967080
chr2	240560929	240561429
chr2	241355863	241356363
chr3	8501416	8501916
chr3	12663937	12664437
chr3	12986867	12987367
chr3	14178464	14178964
chr3	14651365	14651865
chr3	23916841	23917341
chr3	32106238	32106738
chr3	32570641	32571141
chr3	48088758	48089258
chr3	48188309	48188809
chr3	50321248	50321748
chr3	51390861	51391361
chr3	72446955	72447455
chr3	107522709	107523209
chr3	111978777	111979277
chr3	115147734	115148234
chr3	120094309	120094809
chr3	120094819	120095319
chr3	122383910	122384410
chr3	130111307	130111807
chr3	155854315	155854815
chr3	155870274	155870774
chr3	167735406	167735906
chr3	185937819	185938319
chr4	1289548	1290048
chr4	2242035	2242535
chr4	6783416	6783916
chr4	42656928	42657428
chr4	48830767	48831267
chr4	56435424	56435924
chr4	82430253	82430753
chr4	82900406	82900906
chr4	98261105	98261605
chr4	121870264	121870764
chr4	122732286	122732786
chr4	128287745	128288245
chr4	139177827	139178327
chr5	54310402	54310902
chr5	55534843	55535343
chr5	55994824	55995324
chr5	56909678	56910178
chr5	68215445	68215945
chr5	72816390	72816890
chr5	73448545	73449045
chr5	81971714	81972214
chr5	87267494	87267994
chr5	88674152	88674652
chr5	108382218	108382718
chr5	112707168	112707668
chr5	123423203	123423703
chr5	134370908	134371408
chr5	138331729	138332229
chr5	138337999	138338499
chr5	139561010	139561510
chr5	142770057	142770557
chr5	172771004	172771504
chr5	179698574	179699074
chr6	3118394	3118894
chr6	11093504	11094004
chr6	28896092	28896592
chr6	30719998	30720498
chr6	31862758	31863258
chr6	33391316	33391816
chr6	37169734	37170234
chr6	41779797	41780297
chr6	43629084	43629584
chr6	52419952	52420452
chr6	53064662	53065162
chr6	79234467	79234967
chr6	79947336	79947836
chr6	80004287	80004787
chr6	118651387	118651887
chr6	119349575	119350075
chr6	134174722	134175222
chr6	135497539	135498039
chr6	136289703	136290203
chr6	139374403	139374903
chr6	144216255	144216755
chr6	159789485	159789985
chr6	166999016	166999516
chr6	170554002	170554502
chr7	816321	816821
chr7	7182267	7182767
chr7	30134482	30134982
chr7	39949353	39949853
chr7	44123396	44123896
chr7	44999751	45000251
chr7	56051470	56051970
chr7	66493360	66493860
chr7	66996429	66996929
chr7	72828015	72828515
chr7	76379819	76380319
chr7	83162625	83163125
chr7	96321935	96322435
chr7	100489764	100490264
chr7	101244581	101245081
chr7	105013416	105013916
chr7	107044400	107044900
chr7	112450642	112451142
chr7	129780133	129780633
chr7	133081989	133082489
chr8	26577539	26578039
chr8	92103481	92103981
chr8	93917542	93918042
chr8	95133392	95133892
chr8	106269982	106270482
chr8	108443270	108443770
chr8	123072348	123072848
chr8	134457157	134457657
chr8	135457190	135457690
chr8	140464584	140465084
chr8	144104069	144104569
chr8	144147659	144148159
chr9	33024972	33025472
chr9	37667654	37668154
chr9	75028148	75028648
chr9	83980084	83980584
chr9	86282344	86282844
chr9	93095801	93096301
chr9	105244257	105244757
chr9	128552173	128552673
chr9	129028265	129028765
chr9	137459139	137459639
chr10	12129339	12129839
chr10	13161217	13161717
chr10	13299874	13300374
chr10	28302892	28303392
chr10	35126534	35127034
chr10	72691828	72692328
chr10	87863202	87863702
chr10	97498509	97499009
chr10	102245072	102245572
chr10	102743571	102744071
chr10	103918026	103918526
chr10	104268850	104269350
chr10	130110591	130111091
chr11	207223	207723
chr11	535408	535908
chr11	694952	695452
chr11	6481146	6481646
chr11	13277159	13277659
chr11	16738294	16738794
chr11	64878418	64878918
chr11	65487553	65488053
chr11	65497457	65497957
chr11	65919055	65919555
chr11	74492991	74493491
chr11	75428179	75428679
chr11	76444515	76445015
chr11	85664870	85665370
chr11	125111591	125112091
chr12	6470498	6470998
chr12	6689369	6689869
chr12	6825498	6825998
chr12	15882102	15882602
chr12	22544372	22544872
chr12	22624867	22625367
chr12	25386001	25386501
chr12	30754744	30755244
chr12	49322799	49323299
chr12	54280363	54280863
chr12	57520338	57520838
chr12	57547004	57547504
chr12	76084539	76085039
chr12	91578666	91579166
chr12	92929199	92929699
chr12	105107465	105107965
chr12	120086920	120087420
chr12	121399746	121400246
chr12	122526841	122527341
chr12	123232944	123233444
chr12	125049412	125049912
chr12	132908321	132908821
chr12	133079992	133080492
chr13	30465717	30466217
chr13	33542551	33543051
chr13	44435018	44435518
chr13	49792834	49793334
chr13	52011984	52012484
chr13	52652445	52652945
chr14	23006925	23007425
chr14	26598193	26598693
chr14	39432234	39432734
chr14	49586279	49586779
chr14	49620463	49620963
chr14	54509471	54509971
chr14	70809447	70809947
chr14	75427451	75427951
chr14	81219194	81219694
chr14	95157397	95157897
chr14	95534695	95535195
chr14	103333852	103334352
chr15	42920632	42921132
chr15	65286739	65287239
chr15	69160295	69160795
chr15	70097683	70098183
chr15	70099508	70100008
chr15	72231012	72231512
chr15	72474056	72474556
chr15	77420081	77420581
chr15	80059319	80059819
chr15	98852265	98852765
chr16	1943117	1943617
chr16	4624499	4624999
chr16	4802726	4803226
chr16	23149326	23149826
chr16	46689021	46689521
chr16	56451185	56451685
chr16	67935572	67936072
chr16	72093535	72094035
chr16	77190572	77191072
chr16	87392018	87392518
chr17	3892911	3893411
chr17	7614903	7615403
chr17	14300704	14301204
chr17	15699364	15699864
chr17	15999486	15999986
chr17	17836124	17836624
chr17	28952245	28952745
chr17	40287538	40288038
chr17	45060943	45061443
chr17	45161579	45162079
chr17	45316999	45317499
chr17	48892266	48892766
chr17	55238315	55238815
chr17	57084805	57085305
chr17	68457539	68458039
chr17	69326922	69327422
chr17	76540750	76541250
chr17	83051612	83052112
chr18	9913359	9913859
chr18	35041166	35041666
chr18	50281406	50281906
chr18	56576766	56577266
chr18	63422285	63422785
chr19	1103710	1104210
chr19	1205341	1205841
chr19	1652757	1653257
chr19	2051035	2051535
chr19	4723695	4724195
chr19	5680385	5680885
chr19	13151651	13152151
chr19	13795008	13795508
chr19	17859563	17860063
chr19	18152821	18153321
chr19	32971876	32972376
chr19	35702245	35702745
chr19	38930580	38931080
chr19	39390986	39391486
chr19	40425799	40426299
chr19	40777857	40778357
chr19	41994033	41994533
chr19	42075642	42076142
chr19	42242539	42243039
chr19	45692291	45692791
chr19	45792700	45793200
chr19	45863032	45863532
chr19	45999624	46000124
chr19	47515056	47515556
chr19	48363946	48364446
chr19	48637303	48637803
chr19	52189723	52190223
chr19	56121231	56121731
chr20	3767665	3768165
chr20	5119800	5120300
chr20	31723439	31723939
chr21	29073528	29074028
chr21	36989724	36990224
chr21	45643148	45643648
chr21	45894025	45894525
chr22	21735767	21736267
chr22	30423873	30424373
chr22	37199249	37199749
chr22	40044344	40044844
chr22	41620933	41621433
chr22	42090602	42091102
chr1	1304679	1305179
chr1	5992246	5992746
chr1	7783752	7784252
chr1	16613341	16613841
chr1	24642835	24643335
chr1	25430531	25431031
chr1	25906203	25906703
chr1	25997979	25998479
chr1	27914538	27915038
chr1	28247049	28247549
chr1	32964675	32965175
chr1	33127141	33127641
chr1	35192943	35193443
chr1	36223967	36224467
chr1	38859559	38860059
chr1	45499917	45500417
chr1	75724437	75724937
chr1	93180287	93180787
chr1	112395884	112396384
chr1	167721664	167722164
chr1	169893722	169894222
chr1	201268540	201269040
chr1	205352281	205352781
chr1	205813031	205813531
chr1	226062400	226062900
chr1	230426198	230426698
chr1	235328137	235328637
chr1	235866801	235867301
chr1	236794958	236795458
chr1	244048145	244048645
chr1	246931750	246932250
chr1	248873580	248874080
chr2	19901465	19901965
chr2	24076290	24076790
chr2	32356887	32357387
chr2	39437130	39437630
chr2	48440459	48440959
chr2	54455864	54456364
chr2	61470980	61471480
chr2	88627292	88627792
chr2	96815956	96816456
chr2	112275906	112276406
chr2	127106882	127107382
chr2	196926857	196927357
chr2	200811580	200812080
chr2	201451430	201451930
chr2	202375946	202376446
chr2	203239005	203239505
chr2	235493773	235494273
chr3	4868316	4868816
chr3	37860298	37860798
chr3	42590526	42591026
chr3	42804301	42804801
chr3	43621797	43622297
chr3	49939744	49940244
chr3	52536242	52536742
chr3	81761028	81761528
chr3	105366512	105367012
chr3	119498218	119498718
chr3	141737971	141738471
chr3	157160035	157160535
chr3	160565351	160565851
chr3	196081888	196082388
chr4	2418612	2419112
chr4	5852731	5853231
chr4	9691606	9692106
chr4	13484146	13484646
chr4	17810581	17811081
chr4	39638822	39639322
chr4	75514159	75514659
chr4	119454548	119455048
chr4	123398063	123398563
chr4	152779581	152780081
chr4	176065644	176066144
chr4	185209291	185209791
chr5	36151748	36152248
chr5	75511528	75512028
chr5	80407763	80408263
chr5	90409544	90410044
chr5	112737541	112738041
chr5	118988349	118988849
chr5	133051693	133052193
chr5	136629010	136629510
chr5	138542983	138543483
chr5	147782546	147783046
chr5	151758443	151758943
chr5	177457529	177458029
chr6	5003474	5003974
chr6	29649906	29650406
chr6	31958831	31959331
chr6	33410130	33410630
chr6	33417981	33418481
chr6	42563664	42564164
chr6	43170897	43171397
chr6	43174431	43174931
chr6	43369412	43369912
chr6	47309723	47310223
chr6	53061645	53062145
chr6	79537261	79537761
chr6	89081575	89082075
chr6	109009342	109009842
chr6	113611279	113611779
chr6	116229225	116229725
chr6	116571052	116571552
chr6	116680800	116681300
chr6	152301943	152302443
chr6	159726843	159727343
chr6	159762137	159762637
chr6	166382854	166383354
chr7	2631513	2632013
chr7	6008953	6009453
chr7	10973522	10974022
chr7	17298336	17298836
chr7	27739860	27740360
chr7	30026552	30027052
chr7	33062608	33063108
chr7	43869342	43869842
chr7	44224511	44225011
chr7	66654257	66654757
chr7	74658317	74658817
chr7	75914832	75915332
chr7	92134249	92134749
chr7	105522056	105522556
chr7	143901980	143902480
chr8	12754167	12754667
chr8	20197081	20197581
chr8	27311150	27311650
chr8	38231338	38231838
chr8	42843123	42843623
chr8	66613169	66613669
chr8	73293691	73294191
chr8	116766175	116766675
chr8	118111659	118112159
chr8	119873431	119873931
chr8	124998205	124998705
chr8	128794431	128794931
chr8	143829167	143829667
chr9	4679277	4679777
chr9	32552071	32552571
chr9	34458361	34458861
chr9	34665843	34666343
chr9	35814833	35815333
chr9	85940734	85941234
chr9	89661871	89662371
chr9	95875299	95875799
chr9	99104763	99105263
chr9	107282775	107283275
chr9	112333544	112334044
chr9	121201677	121202177
chr9	124861819	124862319
chr9	127611835	127612335
chr9	127735122	127735622
chr9	129460293	129460793
chr9	131277891	131278391
chr10	5889782	5890282
chr10	6086310	6086810
chr10	14837872	14838372
chr10	15168411	15168911
chr10	23438685	23439185
chr10	26860751	26861251
chr10	42638026	42638526
chr10	71851098	71851598
chr10	73096765	73097265
chr10	73997725	73998225
chr10	77253032	77253532
chr10	84139166	84139666
chr10	93420086	93420586
chr10	101353751	101354251
chr10	101818356	101818856
chr10	102152057	102152557
chr10	117375276	117375776
chr10	123153996	123154496
chr10	125719309	125719809
chr11	568293	568793
chr11	1564398	1564898
chr11	43680381	43680881
chr11	62123585	62124085
chr11	62573835	62574335
chr11	64917095	64917595
chr11	66856168	66856668
chr11	71786824	71787324
chr11	75554151	75554651
chr11	78188463	78188963
chr11	85628136	85628636
chr11	86301953	86302453
chr11	96389697	96390197
chr11	118435864	118436364
chr11	119709518	119710018
chr12	6534159	6534659
chr12	6764132	6764632
chr12	6937844	6938344
chr12	10212601	10213101
chr12	31728927	31729427
chr12	49131209	49131709
chr12	51083387	51083887
chr12	53005948	53006448
chr12	53054248	53054748
chr12	53180343	53180843
chr12	55019677	55020177
chr12	56645777	56646277
chr12	68610621	68611121
chr12	71754562	71755062
chr12	82685650	82686150
chr12	89708676	89709176
chr12	108514846	108515346
chr12	119667580	119668080
chr12	120686694	120687194
chr12	123383777	123384277
chr12	132489781	132490281
chr13	30307300	30307800
chr13	31846404	31846904
chr13	32586087	32586587
chr13	45464622	45465122
chr13	51803916	51804416
chr14	24242431	24242931
chr14	31026327	31026827
chr14	63543193	63543693
chr14	64986898	64987398
chr14	65102340	65102840
chr14	67619522	67620022
chr14	68979186	68979686
chr14	75237373	75237873
chr14	77457459	77457959
chr14	103385047	103385547
chr14	103538683	103539183
chr14	103847388	103847888
chr15	42273230	42273730
chr15	44195076	44195576
chr15	45200286	45200786
chr15	58749708	58750208
chr15	65869182	65869682
chr15	92809059	92809559
chr15	92904165	92904665
chr16	2429038	2429538
chr16	11915774	11916274
chr16	15055922	15056422
chr16	29973481	29973981
chr16	31459206	31459706
chr16	53130502	53131002
chr16	56102351	56102851
chr16	57300445	57300945
chr16	81006962	81007462
chr16	81076994	81077494
chr16	87950783	87951283
chr16	88452860	88453360
chr17	1684689	1685189
chr17	2041681	2042181
chr17	3048750	3049250
chr17	4710252	4710752
chr17	7014475	7014975
chr17	8435634	8436134
chr17	42676897	42677397
chr17	44344974	44345474
chr17	45148076	45148576
chr17	50930930	50931430
chr17	63550005	63550505
chr17	63842769	63843269
chr17	75032303	75032803
chr17	79839249	79839749
chr17	81512673	81513173
chr17	82698573	82699073
chr18	8704951	8705451
chr18	21704594	21705094
chr18	23452934	23453434
chr18	31685274	31685774
chr18	35240708	35241208
chr18	36828807	36829307
chr18	51029857	51030357
chr19	1021010	1021510
chr19	2061429	2061929
chr19	2950549	2951049
chr19	4342576	4343076
chr19	5904415	5904915
chr19	9818950	9819450
chr19	12791178	12791678
chr19	36054131	36054631
chr19	37251499	37251999
chr19	41859535	41860035
chr19	42283585	42284085
chr19	42325246	42325746
chr19	48619160	48619660
chr19	48624018	48624518
chr19	49496043	49496543
chr19	49869285	49869785
chr19	58440036	58440536
chr20	325145	325645
chr20	5911191	5911691
chr20	23350459	23350959
chr20	25390637	25391137
chr20	33489708	33490208
chr20	34558392	34558892
chr20	40689015	40689515
chr20	41028444	41028944
chr20	43457594	43458094
chr20	49915533	49916033
chr20	63864881	63865381
chr20	64285743	64286243
chr21	37366421	37366921
chr22	19479497	19479997
chr22	20020751	20021251
chr22	38181658	38182158
chr22	38700782	38701282
chr22	41367126	41367626
chr22	41444261	41444761
chrX	47217683	47218183
chrX	53422489	53422989
chr1	2474890	2475390
chr1	2586351	2586851
chr1	3624609	3625109
chr1	20661335	20661835
chr1	23368143	23368643
chr1	23959491	23959991
chr1	26921391	26921891
chr1	31065587	31066087
chr1	31296698	31297198
chr1	33036730	33037230
chr1	40161072	40161572
chr1	43649762	43650262
chr1	84077735	84078235
chr1	89524550	89525050
chr1	147599741	147600241
chr1	153727644	153728144
chr1	154558658	154559158
chr1	155227383	155227883
chr1	155308498	155308998
chr1	156338102	156338602
chr1	159780625	159781125
chr1	161202032	161202532
chr1	166876130	166876630
chr1	181088413	181088913
chr1	228109123	228109623
chr1	230066838	230067338
chr1	236281835	236282335
chr1	248825759	248826259
chr2	20051489	20051989
chr2	31233764	31234264
chr2	38602874	38603374
chr2	71227136	71227636
chr2	73233135	73233635
chr2	74374454	74374954
chr2	96788229	96788729
chr2	97995699	97996199
chr2	109613975	109614475
chr2	128027932	128028432
chr2	135741430	135741930
chr2	153871514	153872014
chr2	169827160	169827660
chr2	189784155	189784655
chr2	208265784	208266284
chr2	219509612	219510112
chr2	219511616	219512116
chr2	219552467	219552967
chr2	224585287	224585787
chr2	232696966	232697466
chr2	241508444	241508944
chr3	12810147	12810647
chr3	14124673	14125173
chr3	23945017	23945517
chr3	47009215	47009715
chr3	47513231	47513731
chr3	48439932	48440432
chr3	50359379	50359879
chr3	88058808	88059308
chr3	93979811	93980311
chr3	149086318	149086818
chr3	150407991	150408491
chr3	156554990	156555490
chr3	179562648	179563148
chr3	180912118	180912618
chr3	197554638	197555138
chr4	3955284	3955784
chr4	39182125	39182625
chr4	47914463	47914963
chr4	67700989	67701489
chr4	68349899	68350399
chr4	70688024	70688524
chr4	77158074	77158574
chr4	82429295	82429795
chr4	82784604	82785104
chr4	113761621	113762121
chr4	123396522	123397022
chr4	139453518	139454018
chr4	140373242	140373742
chr4	141220602	141221102
chr4	151099245	151099745
chr5	36242067	36242567
chr5	43313263	43313763
chr5	44808650	44809150
chr5	88675690	88676190
chr5	93581300	93581800
chr5	98773285	98773785
chr5	126776791	126777291
chr5	134845701	134846201
chr5	149357667	149358167
chr5	176537678	176538178
chr6	15245474	15245974
chr6	18155109	18155609
chr6	26122922	26123422
chr6	26537233	26537733
chr6	30617189	30617689
chr6	32128076	32128576
chr6	36027475	36027975
chr6	36197053	36197553
chr6	36885627	36886127
chr6	42984230	42984730
chr6	43059275	43059775
chr6	44246142	44246642
chr6	70413164	70413664
chr6	75284647	75285147
chr6	107459426	107459926
chr6	108560525	108561025
chr6	127266588	127267088
chr6	155314361	155314861
chr6	162727590	162728090
chr7	875994	876494
chr7	1028164	1028664
chr7	12686571	12687071
chr7	23531790	23532290
chr7	32495176	32495676
chr7	42911824	42912324
chr7	56106319	56106819
chr7	65037907	65038407
chr7	73578418	73578918
chr7	87059552	87060052
chr7	87345303	87345803
chr7	99472544	99473044
chr7	100889611	100890111
chr7	102748580	102749080
chr7	107743466	107743966
chr7	117019962	117020462
chr7	124929731	124930231
chr7	138459842	138460342
chr7	140176925	140177425
chr7	140924748	140925248
chr8	22548868	22549368
chr8	41490210	41490710
chr8	54593344	54593844
chr8	56001234	56001734
chr8	63168306	63168806
chr8	66113116	66113616
chr8	73746745	73747245
chr8	80030041	80030541
chr8	94822974	94823474
chr8	104588832	104589332
chr8	129939699	129940199
chr8	132775041	132775541
chr8	140511135	140511635
chr8	142216046	142216546
chr8	144137486	144137986
chr8	144326699	144327199
chr9	15422508	15423008
chr9	35604029	35604529
chr9	36258288	36258788
chr9	74497038	74497538
chr9	81689461	81689961
chr9	92325390	92325890
chr9	127916896	127917396
chr9	128275858	128276358
chr9	128688772	128689272
chr9	129178087	129178587
chr9	129835130	129835630
chr9	130712509	130713009
chr9	131318055	131318555
chr9	132354839	132355339
chr9	134067835	134068335
chr9	136483120	136483620
chr9	136849125	136849625
chr9	136949914	136950414
chr10	31032199	31032699
chr10	48306249	48306749
chr10	67764181	67764681
chr10	68900943	68901443
chr10	69318504	69319004
chr10	70146461	70146961
chr10	70403821	70404321
chr10	84244502	84245002
chr10	97640389	97640889
chr10	110211056	110211556
chr10	110871496	110871996
chr10	114174054	114174554
chr10	115093120	115093620
chr10	131900364	131900864
chr11	6619249	6619749
chr11	18698402	18698902
chr11	36253168	36253668
chr11	47269786	47270286
chr11	62707313	62707813
chr11	65321707	65322207
chr11	65421999	65422499
chr11	65890321	65890821
chr11	68460330	68460830
chr11	70270357	70270857
chr11	72103120	72103620
chr11	72793560	72794060
chr11	74748546	74749046
chr11	95789576	95790076
chr11	117327565	117328065
chr11	119057091	119057591
chr11	123511118	123511618
chr12	752307	752807
chr12	6752910	6753410
chr12	8949739	8950239
chr12	26124718	26125218
chr12	32678976	32679476
chr12	49188931	49189431
chr12	49741134	49741634
chr12	51424513	51425013
chr12	56636165	56636665
chr12	62259972	62260472
chr12	69239252	69239752
chr12	81598160	81598660
chr12	92038422	92038922
chr12	95473849	95474349
chr12	109573409	109573909
chr12	110742733	110743233
chr12	116737827	116738327
chr12	128823780	128824280
chr13	23375446	23375946
chr13	24922690	24923190
chr13	44577111	44577611
chr14	21455952	21456452
chr14	22919112	22919612
chr14	24135818	24136318
chr14	31207566	31208066
chr14	34462150	34462650
chr14	50532416	50532916
chr14	60248779	60249279
chr14	65412337	65412837
chr14	66507745	66508245
chr14	73027001	73027501
chr14	77320161	77320661
chr14	81220872	81221372
chr14	88792683	88793183
chr14	90828008	90828508
chr14	94026078	94026578
chr14	105490568	105491068
chr15	22838257	22838757
chr15	43510632	43511132
chr15	63189157	63189657
chr15	68053959	68054459
chr15	74615456	74615956
chr15	74937831	74938331
chr16	1342887	1343387
chr16	3003723	3004223
chr16	10944175	10944675
chr16	58499769	58500269
chr16	67183466	67183966
chr16	89490464	89490964
chr16	90077228	90077728
chr17	1516521	1517021
chr17	12020512	12021012
chr17	28719435	28719935
chr17	28812302	28812802
chr17	31901552	31902052
chr17	35809149	35809649
chr17	40139968	40140468
chr17	41689121	41689621
chr17	43483553	43484053
chr17	44308265	44308765
chr17	46225214	46225714
chr17	50560380	50560880
chr17	68247693	68248193
chr17	75154376	75154876
chr17	75784453	75784953
chr17	77140464	77140964
chr17	78840634	78841134
chr18	44678869	44679369
chr18	54224458	54224958
chr18	61894160	61894660
chr19	506925	507425
chr19	1855289	1855789
chr19	6372459	6372959
chr19	7069100	7069600
chr19	10502606	10503106
chr19	10568855	10569355
chr19	11813952	11814452
chr19	11964725	11965225
chr19	12440877	12441377
chr19	12890753	12891253
chr19	13747508	13748008
chr19	16111428	16111928
chr19	17303250	17303750
chr19	17305285	17305785
chr19	35757785	35758285
chr19	38402812	38403312
chr19	40444493	40444993
chr19	42396835	42397335
chr19	45485225	45485725
chr19	47225973	47226473
chr19	47274052	47274552
chr19	47600302	47600802
chr19	49443583	49444083
chr19	49451676	49452176
chr19	49453256	49453756
chr19	55516830	55517330
chr19	55599439	55599939
chr19	58401096	58401596
chr20	18507588	18508088
chr20	35771702	35772202
chr20	45857258	45857758
chr20	45972222	45972722
chr20	59032143	59032643
chr21	33479759	33480259
chr22	17171355	17171855
chr22	20858624	20859124
chr22	23145071	23145571
chr22	24555032	24555532
chr22	38506283	38506783
chrX	16719329	16719829
chrX	41085036	41085536
chr1	1231832	1232332
chr1	7460715	7461215
chr1	9593344	9593844
chr1	11059865	11060365
chr1	15524813	15525313
chr1	15526552	15527052
chr1	16644454	16644954
chr1	17011721	17012221
chr1	17053865	17054365
chr1	22451537	22452037
chr1	24415409	24415909
chr1	27234159	27234659
chr1	27490008	27490508
chr1	31644704	31645204
chr1	38990935	38991435
chr1	43946407	43946907
chr1	51236006	51236506
chr1	67430217	67430717
chr1	72283489	72283989
chr1	86914225	86914725
chr1	94418085	94418585
chr1	108746362	108746862
chr1	113390104	113390604
chr1	116372890	116373390
chr1	155001937	155002437
chr1	155859223	155859723
chr1	162561170	162561670
chr1	173476889	173477389
chr1	173867819	173868319
chr1	179882335	179882835
chr1	198937225	198937725
chr1	211830551	211831051
chr1	212857948	212858448
chr1	244970526	244971026
chr2	677172	677672
chr2	2613357	2613857
chr2	24047253	24047753
chr2	25878295	25878795
chr2	63840650	63841150
[truncated: 212,521+ more rows]

## Sheet: Cone peakSet
The genomic coordinates of the peaks in Cone class
Chromosome	Start	End
chr1	3900550	3901050
chr1	7961280	7961780
chr1	9910281	9910781
chr1	16613337	16613837
chr1	16644460	16644960
chr1	16904686	16905186
chr1	16913759	16914259
chr1	32817266	32817766
chr1	43946401	43946901
chr1	44674292	44674792
chr1	58783848	58784348
chr1	70410876	70411376
chr1	85276402	85276902
chr1	89994818	89995318
chr1	109984408	109984908
chr1	113812188	113812688
chr1	151909308	151909808
chr1	155277086	155277586
chr1	156767191	156767691
chr1	169893731	169894231
chr1	172532809	172533309
chr1	179954476	179954976
chr1	184754730	184755230
chr1	206635231	206635731
chr1	212857940	212858440
chr1	228139841	228140341
chr1	228165409	228165909
chr1	230426212	230426712
chr1	230978721	230979221
chr1	232629971	232630471
chr1	235504286	235504786
chr1	241519540	241520040
chr1	244451822	244452322
chr1	244652593	244653093
chr2	676645	677145
chr2	20650884	20651384
chr2	26345693	26346193
chr2	27489651	27490151
chr2	30146644	30147144
chr2	36966475	36966975
chr2	42361317	42361817
chr2	48314128	48314628
chr2	55617558	55618058
chr2	60881298	60881798
chr2	70900290	70900790
chr2	99140979	99141479
chr2	112275225	112275725
chr2	112645593	112646093
chr2	121736750	121737250
chr2	127387869	127388369
chr2	153871504	153872004
chr2	170928858	170929358
chr2	172555705	172556205
chr2	175168111	175168611
chr2	177212337	177212837
chr2	178450983	178451483
chr2	197453209	197453709
chr2	207529676	207530176
chr2	207625037	207625537
chr2	207769784	207770284
chr2	209423713	209424213
chr2	219387741	219388241
chr2	222860721	222861221
chr2	224585285	224585785
chr2	239400816	239401316
chr3	11719432	11719932
chr3	12810161	12810661
chr3	27484226	27484726
chr3	31532304	31532804
chr3	38024841	38025341
chr3	38164845	38165345
chr3	48663869	48664369
chr3	50299337	50299837
chr3	93979778	93980278
chr3	98522690	98523190
chr3	119034654	119035154
chr3	123584874	123585374
chr3	128680590	128681090
chr3	136752192	136752692
chr3	141231467	141231967
chr3	167734867	167735367
chr3	195442895	195443395
chr4	781738	782238
chr4	1346880	1347380
chr4	2536136	2536636
chr4	3074331	3074831
chr4	6269468	6269968
chr4	8158652	8159152
chr4	25913859	25914359
chr4	37686196	37686696
chr4	39527328	39527828
chr4	42656921	42657421
chr4	77820057	77820557
chr4	86594008	86594508
chr4	89111247	89111747
chr4	101347419	101347919
chr4	185471079	185471579
chr5	5422018	5422518
chr5	32312771	32313271
chr5	34929142	34929642
chr5	43121230	43121730
chr5	61331863	61332363
chr5	81750891	81751391
chr5	90558344	90558844
chr5	91379986	91380486
chr5	115169733	115170233
chr5	115544588	115545088
chr5	138464859	138465359
chr5	168579535	168580035
chr5	176647129	176647629
chr6	31815233	31815733
chr6	63572209	63572709
chr6	85678559	85679059
chr6	89080428	89080928
chr6	134174666	134175166
chr6	135497550	135498050
chr6	136289601	136290101
chr6	162727661	162728161
chr6	166627052	166627552
chr6	170553994	170554494
chr7	1459425	1459925
chr7	7640404	7640904
chr7	35800801	35801301
chr7	36152603	36153103
chr7	44606572	44607072
chr7	75738937	75739437
chr7	77696081	77696581
chr7	108525970	108526470
chr7	129224606	129225106
chr7	139359508	139360008
chr7	155297510	155298010
chr8	11802455	11802955
chr8	13133138	13133638
chr8	28889943	28890443
chr8	30082891	30083391
chr8	37899347	37899847
chr8	80030039	80030539
chr8	93916649	93917149
chr8	95133426	95133926
chr8	100721912	100722412
chr8	102238789	102239289
chr8	102863977	102864477
chr8	123274419	123274919
chr8	126558247	126558747
chr8	144827088	144827588
chr9	2717363	2717863
chr9	15422457	15422957
chr9	72365108	72365608
chr9	79571534	79572034
chr9	85741826	85742326
chr9	86282381	86282881
chr9	92764714	92765214
chr9	94165819	94166319
chr9	100098907	100099407
chr9	105447817	105448317
chr9	109119772	109120272
chr9	121370157	121370657
chr9	122905138	122905638
chr9	127916894	127917394
chr9	128067792	128068292
chr9	136790690	136791190
chr10	6202630	6203130
chr10	12129348	12129848
chr10	15168763	15169263
chr10	28677140	28677640
chr10	31032237	31032737
chr10	48306391	48306891
chr10	69123796	69124296
chr10	72273604	72274104
chr10	73811689	73812189
chr10	74826128	74826628
chr10	97498510	97499010
chr10	102501942	102502442
chr10	104121731	104122231
chr10	118754896	118755396
chr10	132537283	132537783
chr11	695429	695929
chr11	1389426	1389926
chr11	2400253	2400753
chr11	6234609	6235109
chr11	9460574	9461074
chr11	10808758	10809258
chr11	64917132	64917632
chr11	72080543	72081043
chr11	106022079	106022579
chr11	111926973	111927473
chr11	115504228	115504728
chr12	752256	752756
chr12	13000107	13000607
chr12	26938111	26938611
chr12	30754724	30755224
chr12	31728937	31729437
chr12	39443070	39443570
chr12	49131218	49131718
chr12	50111797	50112297
chr12	53451709	53452209
chr12	53625874	53626374
chr12	89709252	89709752
chr12	92145660	92146160
chr12	109713412	109713912
chr12	119988601	119989101
chr12	121399728	121400228
chr12	122225965	122226465
chr13	19863578	19864078
chr13	19958326	19958826
chr13	23375419	23375919
chr13	27620412	27620912
chr13	44141790	44142290
chr13	49443878	49444378
chr13	51584149	51584649
chr13	97976217	97976717
chr13	110712705	110713205
chr14	24135831	24136331
chr14	32076617	32077117
chr14	49868038	49868538
chr14	52552363	52552863
chr14	54509502	54510002
chr14	59188304	59188804
chr14	61762141	61762641
chr14	67619583	67620083
chr14	75294032	75294532
chr14	92793850	92794350
chr14	99683970	99684470
chr14	101947948	101948448
chr14	104752752	104753252
chr15	33194552	33195052
chr15	41827778	41828278
chr15	58770990	58771490
chr15	90387913	90388413
chr16	2223203	2223703
chr16	4307473	4307973
chr16	11742679	11743179
chr16	20900236	20900736
chr16	22190735	22191235
chr16	30922463	30922963
chr16	50741664	50742164
chr16	53503179	53503679
chr16	88856729	88857229
chr17	2041688	2042188
chr17	7572458	7572958
chr17	14300721	14301221
chr17	14309226	14309726
chr17	46193247	46193747
chr17	46266708	46267208
chr17	48047913	48048413
chr17	56833786	56834286
chr17	64919278	64919778
chr17	77958242	77958742
chr17	78840659	78841159
chr18	9475109	9475609
chr18	12377142	12377642
chr18	50878848	50879348
chr18	59139490	59139990
chr18	59273240	59273740
chr18	62522707	62523207
chr18	62714926	62715426
chr18	67516652	67517152
chr18	74291796	74292296
chr18	74496029	74496529
chr18	79068901	79069401
chr18	80033926	80034426
chr19	2096399	2096899
chr19	5680460	5680960
chr19	10871114	10871614
chr19	11434982	11435482
chr19	18203901	18204401
chr19	18281407	18281907
chr19	40465602	40466102
chr19	42268517	42269017
chr19	47821661	47822161
chr19	49676648	49677148
chr19	49876467	49876967
chr19	49877136	49877636
chr19	54189675	54190175
chr20	5126660	5127160
chr20	5610838	5611338
chr20	23361852	23362352
chr20	31723424	31723924
chr20	32357916	32358416
chr20	33993042	33993542
chr20	35742075	35742575
chr20	63739375	63739875
chr21	14383074	14383574
chr21	33641565	33642065
chr21	36156268	36156768
chr21	42496052	42496552
chr21	42893021	42893521
chr21	42974059	42974559
chr21	45643143	45643643
chr22	23069910	23070410
chr22	40636515	40637015
chr22	41286078	41286578
chr22	46035665	46036165
chr1	1115997	1116497
chr1	1375073	1375573
chr1	2227524	2228024
chr1	3857072	3857572
chr1	6613325	6613825
chr1	9539081	9539581
chr1	10210181	10210681
chr1	12618131	12618631
chr1	15524098	15524598
chr1	17119264	17119764
chr1	24744891	24745391
chr1	30718162	30718662
chr1	31938225	31938725
chr1	33036677	33037177
chr1	40040339	40040839
chr1	42958679	42959179
chr1	45490898	45491398
chr1	53945682	53946182
chr1	65420201	65420701
chr1	67430264	67430764
chr1	67684978	67685478
chr1	89524563	89525063
chr1	92298753	92299253
chr1	110338269	110338769
chr1	110963765	110964265
chr1	112715182	112715682
chr1	116372886	116373386
chr1	149886560	149887060
chr1	150876455	150876955
chr1	153633697	153634197
chr1	156500682	156501182
chr1	161202058	161202558
chr1	167553562	167554062
chr1	167936345	167936845
chr1	171781176	171781676
chr1	174999408	174999908
chr1	185156900	185157400
chr1	186375178	186375678
chr1	201941581	201942081
chr1	212284869	212285369
chr1	216723289	216723789
chr1	221741969	221742469
chr1	225777431	225777931
chr1	225999292	225999792
chr1	228457677	228458177
chr1	243255655	243256155
chr1	248837946	248838446
chr2	9630843	9631343
chr2	10448189	10448689
chr2	24971508	24972008
chr2	25041779	25042279
chr2	25878335	25878835
chr2	32356847	32357347
chr2	44168547	44169047
chr2	54723263	54723763
chr2	61538471	61538971
chr2	63840658	63841158
chr2	64751015	64751515
chr2	65129959	65130459
chr2	68252425	68252925
chr2	70889014	70889514
chr2	73071131	73071631
chr2	96208668	96209168
chr2	96265792	96266292
chr2	97995685	97996185
chr2	105037683	105038183
chr2	144332357	144332857
chr2	159286538	159287038
chr2	189674219	189674719
chr2	190880574	190881074
chr2	197499711	197500211
chr2	207711266	207711766
chr2	218406301	218406801
chr2	218959311	218959811
chr2	219279043	219279543
chr2	219543713	219544213
chr2	231708115	231708615
chr2	237966568	237967068
chr3	5187259	5187759
chr3	9731048	9731548
chr3	13650452	13650952
chr3	14948221	14948721
chr3	48556639	48557139
chr3	50321247	50321747
chr3	68932364	68932864
chr3	72446934	72447434
chr3	75434968	75435468
chr3	105868788	105869288
chr3	115147722	115148222
chr3	120907910	120908410
chr3	121834884	121835384
chr3	122383944	122384444
chr3	125915779	125916279
chr3	132722669	132723169
chr3	136861901	136862401
chr3	142578658	142579158
chr3	143971825	143972325
chr3	150546473	150546973
chr3	156674269	156674769
chr3	160565388	160565888
chr3	160755225	160755725
chr3	186108923	186109423
chr3	196081898	196082398
chr4	2242030	2242530
chr4	2261982	2262482
chr4	2418618	2419118
chr4	2843540	2844040
chr4	3955327	3955827
chr4	7067998	7068498
chr4	9691585	9692085
chr4	39977427	39977927
chr4	48341046	48341546
chr4	75724237	75724737
chr4	82374062	82374562
chr4	82429307	82429807
chr4	87006930	87007430
chr4	94451634	94452134
chr4	107989534	107990034
chr4	145180441	145180941
chr4	148442404	148442904
chr4	162163809	162164309
chr4	165112678	165113178
chr4	165378786	165379286
chr4	169620102	169620602
chr4	183504364	183504864
chr4	184649263	184649763
chr4	185396314	185396814
chr5	41903957	41904457
chr5	45696158	45696658
chr5	56815227	56815727
chr5	56909720	56910220
chr5	57173537	57174037
chr5	80407777	80408277
chr5	88141090	88141590
chr5	96935636	96936136
chr5	98773316	98773816
chr5	108748535	108749035
chr5	109409765	109410265
chr5	112922062	112922562
chr5	123423205	123423705
chr5	127030371	127030871
chr5	131796866	131797366
chr5	132866257	132866757
chr5	138337996	138338496
chr5	138352340	138352840
chr5	139341494	139341994
chr5	141636674	141637174
chr5	146182467	146182967
chr5	150758368	150758868
chr5	151771235	151771735
chr5	173887925	173888425
chr5	176619137	176619637
chr5	179559351	179559851
chr5	179732411	179732911
chr6	11093495	11093995
chr6	30556355	30556855
chr6	35259248	35259748
chr6	37169785	37170285
chr6	43369425	43369925
chr6	52419915	52420415
chr6	52995095	52995595
chr6	70413107	70413607
chr6	80106384	80106884
chr6	81752531	81753031
chr6	85643176	85643676
chr6	99425167	99425667
chr6	110874473	110874973
chr6	151390075	151390575
chr6	151452041	151452541
chr6	154733078	154733578
chr6	166999020	166999520
chr7	993034	993534
chr7	6104607	6105107
chr7	21427141	21427641
chr7	21427765	21428265
chr7	30284158	30284658
chr7	35037509	35038009
chr7	44748264	44748764
chr7	44999791	45000291
chr7	55365759	55366259
chr7	66493366	66493866
chr7	66628475	66628975
chr7	73738720	73739220
chr7	76359083	76359583
chr7	77122231	77122731
chr7	77536698	77537198
chr7	77798561	77799061
chr7	83162661	83163161
chr7	92134243	92134743
chr7	94658268	94658768
chr7	99472546	99473046
chr7	100081596	100082096
chr7	100148633	100149133
chr7	105012874	105013374
chr7	106284845	106285345
chr7	107168436	107168936
chr7	112206362	112206862
chr7	112450081	112450581
chr7	135211355	135211855
chr7	138001999	138002499
chr7	140176969	140177469
chr7	140696429	140696929
chr7	148884106	148884606
chr7	149714473	149714973
chr7	151057826	151058326
chr7	152463657	152464157
chr7	158829332	158829832
chr8	38231320	38231820
chr8	38996365	38996865
chr8	54101714	54102214
chr8	56211243	56211743
chr8	61714415	61714915
chr8	63168298	63168798
chr8	66667057	66667557
chr8	70401917	70402417
chr8	92965444	92965944
chr8	100951875	100952375
chr8	101205431	101205931
chr8	106270029	106270529
chr8	109334002	109334502
chr8	123416274	123416774
chr8	129939741	129940241
chr9	20683946	20684446
chr9	34989363	34989863
chr9	35161756	35162256
chr9	35731979	35732479
chr9	75088056	75088556
chr9	89310690	89311190
chr9	93095350	93095850
chr9	96449868	96450368
chr9	97411709	97412209
chr9	98796352	98796852
chr9	101533536	101534036
chr9	113401088	113401588
chr9	120714310	120714810
chr9	120868776	120869276
chr9	123268462	123268962
chr9	127396674	127397174
chr9	128552229	128552729
chr9	132354939	132355439
chr9	134025008	134025508
chr9	137240966	137241466
chr9	137241934	137242434
chr9	137423049	137423549
chr10	3126778	3127278
chr10	11611491	11611991
chr10	22003513	22004013
chr10	25016290	25016790
chr10	26860795	26861295
chr10	31759990	31760490
chr10	44978588	44979088
chr10	68527298	68527798
chr10	73096618	73097118
chr10	73997822	73998322
chr10	74150892	74151392
chr10	80408235	80408735
chr10	84328207	84328707
chr10	99620289	99620789
chr10	101353787	101354287
chr10	102503595	102504095
chr10	102642013	102642513
chr10	110007554	110008054
chr10	110497571	110498071
chr10	110919093	110919593
chr10	122374271	122374771
chr10	125719365	125719865
chr11	3797463	3797963
chr11	13668216	13668716
chr11	16738313	16738813
chr11	45847134	45847634
chr11	47408194	47408694
chr11	62665032	62665532
chr11	62831888	62832388
chr11	64241163	64241663
chr11	64269833	64270333
chr11	73597964	73598464
chr11	75525767	75526267
chr11	77066631	77067131
chr11	83156538	83157038
chr11	85628205	85628705
chr11	87037660	87038160
chr11	95230975	95231475
chr11	96389718	96390218
chr11	106077149	106077649
chr11	118435986	118436486
chr11	119095231	119095731
chr11	119381441	119381941
chr11	123062340	123062840
chr11	126062701	126063201
chr11	130002273	130002773
chr11	130069541	130070041
chr12	4320886	4321386
chr12	6851837	6852337
chr12	8949779	8950279
chr12	25250905	25251405
chr12	26833101	26833601
chr12	45728727	45729227
chr12	49322786	49323286
chr12	49707343	49707843
chr12	53727342	53727842
chr12	55973687	55974187
chr12	67268944	67269444
chr12	68610571	68611071
chr12	71663733	71664233
chr12	95217383	95217883
chr12	96035479	96035979
chr12	100266839	100267339
chr12	101830744	101831244
chr12	113221013	113221513
chr12	118016359	118016859
chr13	21459204	21459704
chr13	26557411	26557911
chr13	30306902	30307402
chr13	30617564	30618064
chr13	32586047	32586547
chr13	45341054	45341554
chr13	46211636	46212136
chr13	49936167	49936667
chr13	51452985	51453485
chr13	52011950	52012450
chr13	95676683	95677183
chr13	97433162	97433662
chr13	110914984	110915484
chr14	21455949	21456449
chr14	23301625	23302125
chr14	24114478	24114978
chr14	34462152	34462652
chr14	35533700	35534200
chr14	35826031	35826531
chr14	45134280	45134780
chr14	49862697	49863197
chr14	50312000	50312500
chr14	51094917	51095417
chr14	52729721	52730221
chr14	60508878	60509378
chr14	63543163	63543663
chr14	65102334	65102834
chr14	72893964	72894464
chr14	74084375	74084875
chr14	74493210	74493710
chr14	90382974	90383474
chr14	93115099	93115599
chr14	95157335	95157835
chr14	99480734	99481234
chr14	99604119	99604619
chr14	100192770	100193270
chr14	102087002	102087502
chr14	103333782	103334282
chr14	104882165	104882665
chr15	31326318	31326818
chr15	41972349	41972849
chr15	43791941	43792441
chr15	64163032	64163532
chr15	65286769	65287269
chr15	69160285	69160785
chr15	72474042	72474542
chr15	74598212	74598712
chr15	80059327	80059827
chr15	80989606	80990106
chr15	89088105	89088605
chr15	90233887	90234387
chr15	97960174	97960674
chr15	99251053	99251553
chr16	589320	589820
chr16	2537643	2538143
chr16	2905649	2906149
chr16	4253767	4254267
chr16	4958009	4958509
chr16	10743943	10744443
chr16	21502026	21502526
chr16	22297054	22297554
chr16	28211741	28212241
chr16	30923053	30923553
chr16	53130324	53130824
chr16	57300454	57300954
chr16	67183465	67183965
chr16	68448346	68448846
chr16	84504506	84505006
chr16	89701874	89702374
chr17	1716129	1716629
chr17	7214203	7214703
chr17	7239408	7239908
chr17	8631101	8631601
chr17	18039058	18039558
chr17	28335413	28335913
chr17	41689131	41689631
chr17	42388399	42388899
chr17	43483541	43484041
chr17	46193836	46194336
chr17	48892268	48892768
chr17	50866234	50866734
chr17	57084886	57085386
chr17	58517780	58518280
chr17	58532490	58532990
chr17	63621919	63622419
chr17	67993429	67993929
chr17	68457539	68458039
chr17	69326950	69327450
chr17	75784848	75785348
chr17	77140433	77140933
chr17	82458366	82458866
chr18	158164	158664
chr18	9102426	9102926
chr18	9136361	9136861
chr18	12947614	12948114
chr18	21740480	21740980
chr18	32092298	32092798
chr18	48161502	48162002
chr18	50194965	50195465
chr18	50287665	50288165
chr18	54224450	54224950
chr18	57435031	57435531
chr18	59359156	59359656
chr18	62186981	62187481
chr18	79679189	79679689
chr18	79951522	79952022
chr19	1268976	1269476
chr19	4065696	4066196
chr19	4723723	4724223
chr19	6110360	6110860
chr19	8390026	8390526
chr19	8513931	8514431
chr19	10835586	10836086
chr19	11766749	11767249
chr19	12140179	12140679
chr19	14136734	14137234
chr19	16659957	16660457
chr19	18152838	18153338
chr19	18224404	18224904
chr19	18522096	18522596
chr19	18636604	18637104
chr19	19385391	19385891
chr19	19776301	19776801
chr19	32675006	32675506
chr19	35702204	35702704
chr19	39342028	39342528
chr19	45717269	45717769
chr19	47112944	47113444
chr19	48468972	48469472
chr19	48623966	48624466
chr19	48738707	48739207
chr19	48993235	48993735
chr19	50329001	50329501
chr19	50657983	50658483
chr19	50724666	50725166
chr19	54159631	54160131
chr19	54190359	54190859
chr19	56121234	56121734
chr19	56314633	56315133
chr20	2142609	2143109
chr20	8019563	8020063
chr20	11890542	11891042
chr20	17682123	17682623
chr20	21125704	21126204
chr20	34558410	34558910
chr20	34676898	34677398
chr20	49278239	49278739
chr20	50153557	50154057
chr20	50510032	50510532
chr20	50731022	50731522
chr20	62238030	62238530
chr21	29073516	29074016
chr21	33642174	33642674
chr21	36319864	36320364
chr21	39312266	39312766
chr22	41091387	41091887
chr22	41589771	41590271
chr22	41620909	41621409
chr22	42079441	42079941
chrX	20141728	20142228
chrX	53422504	53423004
chr1	1909020	1909520
chr1	1919137	1919637
chr1	7704391	7704891
chr1	7783798	7784298
chr1	10706412	10706912
chr1	11980072	11980572
chr1	15526559	15527059
chr1	16620943	16621443
chr1	18956610	18957110
chr1	23980097	23980597
chr1	25616418	25616918
chr1	27725642	27726142
chr1	32394274	32394774
chr1	33080809	33081309
chr1	33430780	33431280
chr1	41360903	41361403
chr1	42766968	42767468
chr1	84077764	84078264
chr1	108746385	108746885
chr1	113904730	113905230
chr1	151281949	151282449
chr1	155001890	155002390
chr1	155085192	155085692
chr1	166876033	166876533
chr1	169485751	169486251
chr1	173868024	173868524
chr1	174159224	174159724
chr1	176207039	176207539
chr1	180631692	180632192
chr1	207751767	207752267
chr1	241640167	241640667
chr2	10812622	10813122
chr2	20446783	20447283
chr2	25342299	25342799
chr2	27370119	27370619
chr2	27428322	27428822
chr2	32063388	32063888
chr2	39124178	39124678
chr2	54455899	54456399
chr2	62705428	62705928
chr2	69914435	69914935
chr2	74653943	74654443
chr2	96760517	96761017
chr2	96857971	96858471
chr2	109614006	109614506
chr2	119759502	119760002
chr2	120252547	120253047
chr2	121755245	121755745
chr2	127106889	127107389
chr2	130797879	130798379
chr2	135985359	135985859
chr2	159712151	159712651
chr2	162343765	162344265
chr2	174487070	174487570
chr2	189784155	189784655
chr2	190319630	190320130
chr2	200811593	200812093
chr2	200963499	200963999
chr2	203014430	203014930
chr2	218568183	218568683
chr2	218963159	218963659
chr2	219229422	219229922
chr2	219253718	219254218
chr2	221572158	221572658
chr2	231926167	231926667
chr2	238060681	238061181
chr3	9933499	9933999
chr3	14178425	14178925
chr3	14404563	14405063
chr3	25664708	25665208
chr3	33440300	33440800
chr3	47009166	47009666
chr3	48088745	48089245
chr3	49007076	49007576
chr3	49539705	49540205
chr3	49786388	49786888
chr3	50235783	50236283
chr3	51390869	51391369
chr3	58491686	58492186
chr3	62873924	62874424
chr3	66500851	66501351
chr3	84958674	84959174
chr3	100401178	100401678
chr3	101724651	101725151
chr3	108222240	108222740
chr3	128075485	128075985
chr3	130111298	130111798
chr3	133038084	133038584
chr3	169966482	169966982
chr3	170222140	170222640
chr3	179322586	179323086
chr3	179347383	179347883
chr3	184561272	184561772
chr3	185937807	185938307
chr4	7042980	7043480
chr4	9152444	9152944
chr4	15002097	15002597
chr4	17810565	17811065
chr4	26860496	26860996
chr4	56048839	56049339
chr4	70688023	70688523
chr4	77158096	77158596
chr4	82284749	82285249
chr4	82430288	82430788
chr4	83012795	83013295
chr4	83034827	83035327
chr4	84582582	84583082
chr4	98658527	98659027
chr4	98995412	98995912
chr4	99950302	99950802
chr4	102868708	102869208
chr4	112145138	112145638
chr4	118278400	118278900
chr4	121870274	121870774
chr4	122732267	122732767
chr4	151099284	151099784
chr4	152779643	152780143
chr4	159102789	159103289
chr4	165327143	165327643
chr4	173334294	173334794
chr4	185142953	185143453
chr4	185209264	185209764
chr5	271273	271773
chr5	14871704	14872204
chr5	58582807	58583307
chr5	75511499	75511999
chr5	91380803	91381303
chr5	108381902	108382402
chr5	129094435	129094935
chr5	133051668	133052168
chr5	138463966	138464466
chr5	138543199	138543699
chr5	140400938	140401438
chr5	141618750	141619250
chr5	142770071	142770571
chr5	150357296	150357796
chr5	151758459	151758959
chr5	154858262	154858762
chr5	173056952	173057452
chr5	176537640	176538140
chr5	177454330	177454830
chr6	3118402	3118902
chr6	10838291	10838791
chr6	18155043	18155543
chr6	24720955	24721455
chr6	32195428	32195928
chr6	33391333	33391833
chr6	34888978	34889478
chr6	36027472	36027972
chr6	42563701	42564201
chr6	43510136	43510636
chr6	73653737	73654237
chr6	75284640	75285140
chr6	98947763	98948263
chr6	109009344	109009844
chr6	109440434	109440934
chr6	116571012	116571512
chr6	118893725	118894225
chr7	1028130	1028630
chr7	2631584	2632084
chr7	6008883	6009383
chr7	7182274	7182774
chr7	12686555	12687055
chr7	12687272	12687772
chr7	27739850	27740350
chr7	30134455	30134955
chr7	33129005	33129505
chr7	39949281	39949781
chr7	44848026	44848526
chr7	65872867	65873367
chr7	66654257	66654757
chr7	73522147	73522647
chr7	74658388	74658888
chr7	75914827	75915327
chr7	76379813	76380313
chr7	87059530	87060030
chr7	92528282	92528782
chr7	108569566	108570066
chr7	123534480	123534980
chr7	127651732	127652232
chr7	129780108	129780608
chr7	131586300	131586800
chr7	138459947	138460447
chr7	149028585	149029085
chr7	158704645	158705145
chr8	12755317	12755817
chr8	17496768	17497268
chr8	22244819	22245319
chr8	23528581	23529081
chr8	25458243	25458743
chr8	28401817	28402317
chr8	28622432	28622932
chr8	41528829	41529329
chr8	60516606	60517106
chr8	66774910	66775410
chr8	73293962	73294462
chr8	79765154	79765654
chr8	124474516	124475016
chr8	143368524	143369024
chr8	143829180	143829680
chr8	144078382	144078882
chr8	144104043	144104543
chr9	2014880	2015380
chr9	4679298	4679798
chr9	5628774	5629274
chr9	6412895	6413395
chr9	33024963	33025463
chr9	33264516	33265016
chr9	34458460	34458960
chr9	71910997	71911497
chr9	74497041	74497541
chr9	75028290	75028790
chr9	83980073	83980573
chr9	85940745	85941245
chr9	96418216	96418716
chr9	99821552	99822052
chr9	101398427	101398927
chr9	105244261	105244761
chr9	112750471	112750971
chr9	121201780	121202280
chr9	123360127	123360627
chr9	124771090	124771590
chr9	127611909	127612409
chr9	128275841	128276341
chr9	131373232	131373732
chr9	134067882	134068382
chr9	137605106	137605606
chr10	3172828	3173328
chr10	5813245	5813745
chr10	5889746	5890246
chr10	7787827	7788327
chr10	28532526	28533026
chr10	29735690	29736190
chr10	31031702	31032202
chr10	32958076	32958576
chr10	37976505	37977005
chr10	43436559	43437059
chr10	46023243	46023743
chr10	69318509	69319009
chr10	78303229	78303729
chr10	100912645	100913145
chr10	102245085	102245585
chr10	102714137	102714637
chr10	102917936	102918436
chr10	103918044	103918544
chr10	104353418	104353918
chr10	114174094	114174594
chr10	119596910	119597410
chr10	119725681	119726181
chr10	130110587	130111087
chr11	507152	507652
chr11	535430	535930
chr11	568278	568778
chr11	28108061	28108561
chr11	65711994	65712494
chr11	65858088	65858588
chr11	66312656	66313156
chr11	66466557	66467057
chr11	73142161	73142661
chr11	73760992	73761492
chr11	83071767	83072267
chr11	108222584	108223084
chr11	111601929	111602429
chr11	119121164	119121664
chr11	134038885	134039385
chr11	134050437	134050937
chr12	6534105	6534605
chr12	6840649	6841149
chr12	15882108	15882608
chr12	15911061	15911561
chr12	25958369	25958869
chr12	27014170	27014670
chr12	50167278	50167778
chr12	51887808	51888308
chr12	53500676	53501176
chr12	55817601	55818101
chr12	55996935	55997435
chr12	56300208	56300708
chr12	57752210	57752710
chr12	82686574	82687074
chr12	88141962	88142462
chr12	106774326	106774826
chr12	108731338	108731838
chr12	109880294	109880794
chr12	111405303	111405803
chr12	123972784	123973284
chr12	132489806	132490306
chr13	23579062	23579562
chr13	48037762	48038262
chr13	52450418	52450918
chr13	98142752	98143252
chr13	99606338	99606838
chr13	100674693	100675193
chr13	102596686	102597186
chr13	113666961	113667461
chr14	20682578	20683078
chr14	21476840	21477340
chr14	22929226	22929726
chr14	31207569	31208069
chr14	31457230	31457730
chr14	44961779	44962279
chr14	49620423	49620923
chr14	54396572	54397072
chr14	64986900	64987400
chr14	70809327	70809827
chr14	73026936	73027436
chr14	75278249	75278749
chr14	77616559	77617059
chr14	92748406	92748906
chr14	93206923	93207423
chr14	100238500	100239000
chr14	101760384	101760884
chr14	102139476	102139976
chr14	103522642	103523142
chr14	103847405	103847905
chr15	41774330	41774830
chr15	42575239	42575739
chr15	44426925	44427425
chr15	48810926	48811426
chr15	55742922	55743422
chr15	58749699	58750199
chr15	65792149	65792649
chr15	65869176	65869676
chr15	66386489	66386989
chr15	72231021	72231521
chr15	74995187	74995687
chr15	75451502	75452002
chr15	75640018	75640518
chr15	76931384	76931884
chr15	89334639	89335139
chr16	1782506	1783006
chr16	2155304	2155804
chr16	3305209	3305709
chr16	4416460	4416960
chr16	10944181	10944681
chr16	14974769	14975269
chr16	18801480	18801980
chr16	21520253	21520753
chr16	23149316	23149816
chr16	27549795	27550295
chr16	28863161	28863661
chr16	30065419	30065919
chr16	30378113	30378613
chr16	30658122	30658622
chr16	50152657	50153157
chr16	51152183	51152683
chr16	74985026	74985526
chr16	84116664	84117164
chr16	87492828	87493328
chr16	88452830	88453330
chr16	89171315	89171815
chr16	89657513	89658013
chr17	979619	980119
chr17	1684678	1685178
chr17	3636109	3636609
chr17	7931824	7932324
chr17	15999460	15999960
chr17	17836123	17836623
chr17	21284345	21284845
chr17	28041367	28041867
chr17	40139981	40140481
chr17	42609221	42609721
chr17	44186553	44187053
chr17	45161577	45162077
chr17	45316853	45317353
chr17	50541949	50542449
chr17	59106754	59107254
chr17	74872860	74873360
chr17	79797106	79797606
chr17	80414885	80415385
chr17	81238870	81239370
chr18	9614341	9614841
chr19	680338	680838
chr19	1490516	1491016
chr19	4791356	4791856
chr19	6459974	6460474
chr19	9834858	9835358
chr19	11155641	11156141
chr19	11964737	11965237
chr19	13952087	13952587
chr19	14518425	14518925
chr19	16496058	16496558
chr19	17303209	17303709
chr19	19063358	19063858
chr19	19663550	19664050
chr19	35931440	35931940
chr19	38374361	38374861
chr19	39390936	39391436
chr19	45485232	45485732
chr19	45792686	45793186
chr19	47048494	47048994
chr19	49127924	49128424
chr19	49496089	49496589
chr19	49640070	49640570
chr19	54136971	54137471
chr19	55339489	55339989
chr19	56507508	56508008
chr20	35771685	35772185
chr20	43457591	43458091
chr20	45972233	45972733
chr20	59032148	59032648
chr20	63520454	63520954
chr21	15729615	15730115
chr21	32392826	32393326
chr21	33479718	33480218
chr21	37267348	37267848
chr22	19122293	19122793
chr22	20116996	20117496
chr22	21735650	21736150
chr22	23145001	23145501
chr22	29603249	29603749
chr22	33920799	33921299
chr22	36387814	36388314
chrX	15854638	15855138
chrX	16719330	16719830
chr1	1231805	1232305
chr1	1399197	1399697
chr1	1615177	1615677
chr1	3901158	3901658
chr1	10398693	10399193
chr1	11805782	11806282
chr1	17011745	17012245
chr1	25430566	25431066
chr1	28088470	28088970
chr1	45499864	45500364
chr1	45686934	45687434
chr1	66924701	66925201
chr1	75724440	75724940
chr1	88992665	88993165
chr1	108876713	108877213
chr1	113929306	113929806
chr1	155135559	155136059
chr1	156338093	156338593
chr1	159945380	159945880
chr1	162069427	162069927
chr1	165630930	165631430
chr1	167220453	167220953
chr1	173476850	173477350
chr1	182029493	182029993
chr1	183635691	183636191
chr1	201946315	201946815
chr1	202810655	202811155
chr1	205227665	205228165
chr1	205813009	205813509
chr1	211133982	211134482
chr1	223845685	223846185
chr1	226062344	226062844
chr1	234599952	234600452
chr1	244048014	244048514
chr2	24076237	24076737
chr2	27409413	27409913
chr2	38602733	38603233
chr2	41840616	41841116
chr2	61471010	61471510
chr2	64653711	64654211
chr2	69643495	69643995
chr2	74458000	74458500
chr2	88691370	88691870
chr2	96788295	96788795
chr2	130342549	130343049
chr2	148645033	148645533
chr2	178194174	178194674
chr2	181680314	181680814
chr2	190648528	190649028
chr2	195656847	195657347
chr2	200864477	200864977
chr2	201451411	201451911
chr2	201780692	201781192
chr2	202375986	202376486
chr2	206159325	206159825
chr2	210171248	210171748
chr2	218270151	218270651
chr2	231604541	231605041
chr2	231781062	231781562
chr2	240560878	240561378
chr3	14124658	14125158
chr3	23916815	23917315
chr3	23945870	23946370
chr3	32570609	32571109
chr3	48635276	48635776
chr3	51941831	51942331
chr3	57755950	57756450
chr3	98901514	98902014
chr3	100260564	100261064
chr3	107522666	107523166
chr3	126475785	126476285
chr3	131381382	131381882
chr3	141738000	141738500
chr3	195543160	195543660
chr3	197736702	197737202
chr4	3292539	3293039
chr4	10116602	10117102
chr4	13484126	13484626
chr4	18021657	18022157
chr4	75514127	75514627
chr4	88592119	88592619
chr4	105473834	105474334
chr4	107720164	107720664
chr4	112231481	112231981
chr4	119212337	119212837
chr4	139015222	139015722
chr4	139177131	139177631
chr4	139301106	139301606
chr4	141133132	141133632
chr4	176319644	176320144
chr5	36151769	36152269
chr5	54310443	54310943
chr5	62412374	62412874
chr5	90474634	90475134
chr5	93581319	93581819
chr5	95646502	95647002
chr5	98928756	98929256
chr5	131263741	131264241
chr5	131635117	131635617
chr5	132963425	132963925
chr5	146203259	146203759
chr5	149960459	149960959
chr5	160119367	160119867
chr5	176388766	176389266
chr5	179550567	179551067
chr6	2988919	2989419
chr6	4135547	4136047
chr6	36594037	36594537
chr6	73520959	73521459
chr6	89081551	89082051
chr6	99515257	99515757
chr6	107958055	107958555
chr6	125749243	125749743
chr6	127266570	127267070
chr6	136792899	136793399
chr6	169701892	169702392
chr7	816300	816800
chr7	1160028	1160528
chr7	2314296	2314796
chr7	2844162	2844662
chr7	4883517	4884017
chr7	16645552	16646052
chr7	23531772	23532272
chr7	25125065	25125565
chr7	26200639	26201139
chr7	26864553	26865053
chr7	30026588	30027088
chr7	32495194	32495694
chr7	33062603	33063103
chr7	42911794	42912294
chr7	44082356	44082856
chr7	65037818	65038318
chr7	76317964	76318464
chr7	96321945	96322445
chr7	98252023	98252523
chr7	100586123	100586623
chr7	101244560	101245060
chr7	111562274	111562774
chr7	112450683	112451183
chr7	116210203	116210703
chr7	123748910	123749410
chr7	135662177	135662677
chr7	151028166	151028666
chr7	151341402	151341902
chr8	8227764	8228264
chr8	18083868	18084368
chr8	27490856	27491356
chr8	41577819	41578319
chr8	66428617	66429117
chr8	66613180	66613680
chr8	73972020	73972520
chr8	79767663	79768163
chr8	85220551	85221051
chr8	96493464	96493964
chr8	98116934	98117434
chr8	108443292	108443792
chr8	109539367	109539867
chr8	124998224	124998724
chr8	143430626	143431126
chr8	144792244	144792744
chr8	144901375	144901875
chr9	33239981	33240481
chr9	35604024	35604524
chr9	36487579	36488079
chr9	81689544	81690044
chr9	88534816	88535316
chr9	91423638	91424138
chr9	98255838	98256338
chr9	104093773	104094273
chr9	105694245	105694745
chr9	107282807	107283307
chr9	125241141	125241641
chr9	128818148	128818648
chr9	129460285	129460785
chr9	129835130	129835630
chr9	132240925	132241425
chr9	133121001	133121501
chr9	137459179	137459679
chr9	137590352	137590852
chr10	931546	932046
chr10	3785149	3785649
chr10	7408407	7408907
chr10	14878540	14879040
chr10	14959351	14959851
chr10	21533797	21534297
chr10	24724435	24724935
chr10	32346115	32346615
chr10	50624673	50625173
chr10	58385047	58385547
chr10	59906367	59906867
chr10	68407083	68407583
chr10	70170384	70170884
chr10	92290869	92291369
chr10	101818375	101818875
chr10	102502523	102503023
chr10	102743486	102743986
chr10	104268844	104269344
chr10	110211067	110211567
chr10	133308954	133309454
chr11	1572000	1572500
chr11	8017953	8018453
chr11	9314453	9314953
chr11	10857849	10858349
chr11	17077456	17077956
chr11	22829655	22830155
chr11	43680388	43680888
chr11	44565212	44565712
chr11	47767159	47767659
chr11	63838553	63839053
chr11	64305122	64305622
chr11	65615230	65615730
chr11	65873453	65873953
chr11	65919032	65919532
chr11	67317520	67318020
chr11	67401675	67402175
chr11	67421022	67421522
chr11	67469089	67469589
chr11	68121267	68121767
chr11	86069004	86069504
chr11	93741326	93741826
chr11	102346962	102347462
chr11	103091961	103092461
chr11	119729230	119729730
chr11	126268744	126269244
chr11	134253208	134253708
chr12	6752908	6753408
chr12	6764275	6764775
chr12	7018343	7018843
chr12	7189334	7189834
chr12	7960659	7961159
chr12	12266783	12267283
chr12	22544021	22544521
chr12	32678996	32679496
chr12	45990452	45990952
chr12	46372587	46373087
chr12	53379628	53380128
chr12	56360060	56360560
chr12	62935000	62935500
chr12	76084491	76084991
chr12	82358578	82359078
chr12	100142689	100143189
chr12	103841075	103841575
chr12	103929847	103930347
chr12	105235900	105236400
chr12	110583118	110583618
chr12	113966188	113966688
chr12	118372738	118373238
chr12	122966283	122966783
chr13	27171792	27172292
chr13	27621525	27622025
chr13	30465727	30466227
chr13	40666440	40666940
chr13	44435021	44435521
chr13	44436642	44437142
chr13	49792829	49793329
chr13	106535495	106535995
chr13	109786384	109786884
chr14	21103795	21104295
chr14	23286032	23286532
chr14	23320987	23321487
chr14	24141388	24141888
chr14	39174812	39175312
chr14	49634139	49634639
chr14	55051385	55051885
chr14	59484177	59484677
chr14	60091680	60092180
chr14	74019053	74019553
chr14	77028505	77029005
chr14	77097989	77098489
chr14	77321141	77321641
chr14	88385373	88385873
chr14	88792685	88793185
chr14	88824401	88824901
chr14	91060446	91060946
chr14	96391654	96392154
chr14	104826346	104826846
chr15	23039397	23039897
chr15	52568831	52569331
chr15	59657344	59657844
chr15	60592357	60592857
chr15	73633249	73633749
chr15	74615431	74615931
chr15	74937817	74938317
chr15	75454015	75454515
chr15	76341034	76341534
chr15	84715955	84716455
chr15	89367372	89367872
chr15	92809036	92809536
chr16	352563	353063
chr16	970836	971336
chr16	1983820	1984320
chr16	4734163	4734663
chr16	14632621	14633121
chr16	28950655	28951155
chr16	30527149	30527649
chr16	31117684	31118184
chr16	56931830	56932330
chr16	58129260	58129760
chr16	66696615	66697115
chr16	67806444	67806944
chr16	69310964	69311464
chr17	2400981	2401481
chr17	7614893	7615393
chr17	7650619	7651119
chr17	8383340	8383840
chr17	17972350	17972850
chr17	28571318	28571818
chr17	29390001	29390501
chr17	31901566	31902066
chr17	39952617	39953117
chr17	47970672	47971172
chr17	49764015	49764515
chr17	63773378	63773878
chr17	63827163	63827663
chr17	63842660	63843160
chr17	64130003	64130503
chr17	68247729	68248229
chr17	75516184	75516684
chr17	75978937	75979437
chr17	80035684	80036184
chr17	81101649	81102149
chr17	83051671	83052171
chr18	23503129	23503629
chr18	35240712	35241212
chr18	37565884	37566384
chr18	50374710	50375210
chr18	57621644	57622144
chr19	1260729	1261229
chr19	1266356	1266856
chr19	3093865	3094365
chr19	5686928	5687428
chr19	8525484	8525984
chr19	8832661	8833161
chr19	12551341	12551841
chr19	14117603	14118103
chr19	14529141	14529641
chr19	17075379	17075879
chr19	17859478	17859978
chr19	29844808	29845308
chr19	33373374	33373874
chr19	36139722	36140222
chr19	40716723	40717223
chr19	41859913	41860413
chr19	42242958	42243458
chr19	45584647	45585147
chr19	46661196	46661696
chr19	47257050	47257550
chr19	47790279	47790779
chr19	48619091	48619591
chr19	49766415	49766915
chr19	58380838	58381338
chr19	58401108	58401608
chr20	325151	325651
chr20	3767665	3768165
chr20	18507601	18508101
chr20	25696645	25697145
chr20	33489700	33490200
chr20	34704445	34704945
chr20	36461092	36461592
chr20	38472369	38472869
chr20	56358666	56359166
chr20	63156081	63156581
chr20	64285725	64286225
chr21	29298594	29299094
chr21	31731944	31732444
chr21	32727817	32728317
chr21	33542647	33543147
chr21	34614997	34615497
chr22	20020751	20021251
chr22	24011007	24011507
chr22	24555049	24555549
chr22	31753706	31754206
chr22	39501997	39502497
chr22	39527613	39528113
chr22	41832528	41833028
chr22	42614699	42615199
chr22	43014991	43015491
chrX	15675437	15675937
chr1	1307802	1308302
chr1	6785110	6785610
chr1	8878543	8879043
chr1	9588404	9588904
chr1	15524850	15525350
chr1	17053838	17054338
chr1	19210096	19210596
chr1	21176698	21177198
chr1	23344179	23344679
chr1	25997986	25998486
chr1	29181771	29182271
chr1	36385782	36386282
chr1	41516030	41516530
chr1	45686320	45686820
chr1	54406224	54406724
chr1	58546573	58547073
chr1	59814645	59815145
chr1	70205380	70205880
chr1	70354536	70355036
chr1	85200820	85201320
chr1	93847288	93847788
chr1	112804115	112804615
chr1	113072883	113073383
chr1	145858870	145859370
chr1	150235886	150236386
chr1	150629411	150629911
chr1	159938157	159938657
chr1	167721628	167722128
chr1	223364031	223364531
chr1	226939983	226940483
chr2	6917187	6917687
chr2	18560369	18560869
chr2	44167858	44168358
chr2	46698751	46699251
chr2	47782771	47783271
chr2	48440472	48440972
chr2	55050386	55050886
chr2	108448878	108449378
chr2	112054058	112054558
chr2	113756372	113756872
chr2	113889725	113890225
chr2	117814338	117814838
chr2	135531093	135531593
chr2	148644443	148644943
chr2	191014020	191014520
chr2	197515716	197516216
chr2	207166076	207166576
chr2	213284143	213284643
chr2	231464338	231464838
chr2	231706885	231707385
chr2	233251317	233251817
chr2	238320129	238320629
chr3	40453020	40453520
chr3	45995600	45996100
chr3	47475682	47476182
chr3	47781710	47782210
chr3	49021341	49021841
chr3	51973831	51974331
chr3	114056326	114056826
chr3	119463478	119463978
chr3	120094292	120094792
chr3	138329689	138330189
chr3	141311583	141312083
chr3	147392112	147392612
chr3	150762948	150763448
chr3	155870227	155870727
chr3	169773113	169773613
chr3	170357403	170357903
chr3	180912127	180912627
chr4	337398	337898
chr4	674088	674588
chr4	973421	973921
chr4	2963213	2963713
chr4	6200402	6200902
chr4	10018729	10019229
chr4	48780177	48780677
chr4	55395608	55396108
chr4	55853322	55853822
chr4	56435428	56435928
chr4	75673207	75673707
chr4	83484903	83485403
chr4	86934695	86935195
chr4	88284524	88285024
chr4	88592969	88593469
chr4	109433329	109433829
chr4	113761594	113762094
chr4	127964943	127965443
chr4	128287723	128288223
chr4	139453522	139454022
chr4	152535942	152536442
chr4	158768694	158769194
chr4	173370579	173371079
chr4	183659008	183659508
chr5	40798073	40798573
chr5	43191930	43192430
chr5	55994806	55995306
chr5	65925457	65925957
chr5	69217504	69218004
chr5	69234580	69235080
chr5	72308314	72308814
chr5	75336825	75337325
chr5	79514324	79514824
chr5	81971750	81972250
chr5	90409560	90410060
chr5	118988335	118988835
chr5	122774793	122775293
chr5	140174834	140175334
chr5	154190211	154190711
chr5	154445682	154446182
chr5	154754926	154755426
chr5	172283861	172284361
chr5	180494002	180494502
chr6	2765076	2765576
chr6	11537190	11537690
chr6	31958824	31959324
chr6	32894459	32894959
chr6	37819197	37819697
chr6	42722324	42722824
chr6	42984130	42984630
chr6	71420615	71421115
chr6	93419426	93419926
chr6	144216250	144216750
chr7	6374169	6374669
chr7	35694860	35695360
chr7	36366959	36367459
chr7	38177899	38178399
chr7	39623334	39623834
chr7	39733110	39733610
chr7	44582096	44582596
chr7	65750739	65751239
chr7	72827986	72828486
chr7	74657279	74657779
chr7	76178074	76178574
chr7	76314203	76314703
chr7	87345353	87345853
chr7	87933977	87934477
chr7	94657760	94658260
chr7	100612188	100612688
chr7	105522063	105522563
chr7	112939636	112940136
chr7	116862249	116862749
chr7	120950386	120950886
chr7	139341488	139341988
chr7	149838068	149838568
chr7	151227078	151227578
chr7	151631971	151632471
chr8	17922566	17923066
chr8	22440753	22441253
chr8	51898967	51899467
chr8	73878691	73879191
chr8	74350171	74350671
chr8	96261675	96262175
chr8	141308156	141308656
chr8	143841106	143841606
chr8	144137456	144137956
chr9	4792528	4793028
chr9	70258645	70259145
chr9	92669956	92670456
chr9	93183862	93184362
chr9	94030519	94031019
chr9	99819803	99820303
chr9	104747430	104747930
chr9	112333520	112334020
chr9	113221212	113221712
chr9	113275284	113275784
chr9	114398293	114398793
chr9	124940776	124941276
chr9	125746358	125746858
chr9	127980924	127981424
chr9	129028167	129028667
chr9	129495844	129496344
chr9	135961181	135961681
chr9	137200618	137201118
chr10	23438722	23439222
chr10	31603316	31603816
chr10	35126540	35127040
chr10	69451235	69451735
chr10	70146467	70146967
chr10	84194282	84194782
chr10	91220398	91220898
chr10	96831963	96832463
chr10	99659137	99659637
chr10	102132695	102133195
chr10	109923315	109923815
chr10	119029391	119029891
chr10	129466838	129467338
chr10	131900386	131900886
chr11	4094435	4094935
chr11	12674091	12674591
chr11	18634240	18634740
chr11	18698381	18698881
chr11	46347134	46347634
chr11	62621835	62622335
chr11	62706128	62706628
chr11	62787093	62787593
chr11	64778607	64779107
chr11	65497501	65498001
chr11	65888344	65888844
chr11	67630062	67630562
chr11	77994661	77995161
chr11	78188492	78188992
chr11	117098321	117098821
chr12	2812363	2812863
chr12	6470480	6470980
chr12	6689378	6689878
chr12	43758659	43759159
chr12	45727371	45727871
chr12	48198032	48198532
chr12	48682055	48682555
chr12	51047926	51048426
chr12	52032832	52033332
chr12	57520377	57520877
chr12	75390809	75391309
chr12	98593381	98593881
chr12	105107481	105107981
chr12	106955618	106956118
chr12	109715237	109715737
chr12	113358278	113358778
chr12	123232922	123233422
chr12	125065108	125065608
chr12	128823787	128824287
chr12	132887421	132887921
chr13	21140220	21140720
chr13	110715339	110715839
chr14	21511163	21511663
chr14	31026337	31026837
chr14	35046025	35046525
chr14	50532426	50532926
chr14	63641790	63642290
chr14	75176660	75177160
chr14	75258889	75259389
chr14	94026083	94026583
chr14	96614468	96614968
chr14	103538649	103539149
chr14	103715453	103715953
chr15	39782324	39782824
chr15	52018919	52019419
chr15	55408154	55408654
chr15	56886985	56887485
chr15	70099498	70099998
chr15	74433706	74434206
chr15	75367759	75368259
chr15	81324068	81324568
chr15	84654046	84654546
chr15	99733280	99733780
chr15	100602095	100602595
chr15	101724256	101724756
chr16	2428994	2429494
chr16	2882917	2883417
chr16	2968913	2969413
chr16	22206000	22206500
chr16	31459193	31459693
chr16	49281709	49282209
chr16	53703757	53704257
chr16	81096182	81096682
chr16	87383588	87384088
chr16	87392021	87392521
chr17	2399465	2399965
chr17	7851608	7852108
chr17	19362542	19363042
chr17	19378126	19378626
chr17	28576726	28577226
chr17	29293924	29294424
chr17	31487610	31488110
chr17	32877019	32877519
chr17	37358987	37359487
chr17	42154876	42155376
chr17	45060895	45061395
chr17	45197736	45198236
chr17	50719320	50719820
chr17	60677150	60677650
chr17	75525350	75525850
chr17	76141072	76141572
chr17	79991553	79992053
chr17	82022874	82023374
chr18	13726321	13726821
chr18	31685252	31685752
chr18	32470796	32471296
chr18	58671114	58671614
chr19	1039802	1040302
chr19	2061446	2061946
chr19	2950541	2951041
chr19	4471775	4472275
chr19	4968739	4969239
chr19	6372439	6372939
chr19	6424965	6425465
chr19	7829626	7830126
chr19	7920437	7920937
chr19	7943681	7944181
chr19	8308086	8308586
chr19	9818936	9819436
chr19	10717746	10718246
chr19	11798228	11798728
chr19	11813961	11814461
chr19	12064418	12064918
chr19	16111356	16111856
chr19	17470040	17470540
chr19	32971905	32972405
chr19	35740440	35740940
chr19	35748226	35748726
chr19	35775125	35775625
chr19	38899473	38899973
chr19	39970769	39971269
chr19	47274044	47274544
chr19	48713959	48714459
chr19	49118987	49119487
chr19	49149216	49149716
chr19	49641675	49642175
chr19	50325483	50325983
chr19	50511151	50511651
chr19	55599424	55599924
chr20	2101616	2102116
chr20	2652287	2652787
chr20	10673802	10674302
chr20	13995212	13995712
chr20	23358017	23358517
chr20	36199664	36200164
chr20	45363206	45363706
chr20	62794096	62794596
chr20	63950938	63951438
chr20	64062820	64063320
chr21	25734713	25735213
chr21	28992748	28993248
chr21	39183252	39183752
chr21	42009748	42010248
chr22	20917022	20917522
chr22	28883032	28883532
chr22	29838161	29838661
chr22	37199256	37199756
chr22	38705371	38705871
chr22	45309523	45310023
chr22	46116342	46116842
chr1	15617090	15617590
chr1	22451553	22452053
chr1	25875374	25875874
chr1	26233895	26234395
chr1	27234364	27234864
chr1	28247035	28247535
chr1	33127215	33127715
chr1	35192974	35193474
chr1	44030165	44030665
chr1	45303423	45303923
chr1	45583275	45583775
chr1	46132430	46132930
chr1	46303380	46303880
chr1	52366234	52366734
chr1	66929911	66930411
chr1	95072418	95072918
chr1	112956071	112956571
chr1	153922840	153923340
chr1	153958413	153958913
chr1	156282613	156283113
chr1	156493180	156493680
chr1	161132524	161133024
chr1	179882342	179882842
chr1	193121678	193122178
chr1	198158901	198159401
chr1	203026187	203026687
chr1	229558697	229559197
chr2	9951361	9951861
chr2	12716546	12717046
chr2	23926897	23927397
chr2	25673379	25673879
chr2	70142481	70142981
chr2	71227121	71227621
chr2	85538819	85539319
chr2	96815966	96816466
chr2	112054962	112055462
chr2	128027111	128027611
chr2	152718287	152718787
chr2	158456528	158457028
chr2	171433847	171434347
chr2	186693786	186694286
chr2	231205655	231206155
chr2	241702178	241702678
chr3	9396487	9396987
chr3	12663960	12664460
chr3	38136993	38137493
chr3	42600346	42600846
chr3	88058765	88059265
chr3	120094817	120095317
chr3	136250339	136250839
chr3	140941576	140942076
chr4	2468674	2469174
chr4	17576886	17577386
chr4	51842696	51843196
chr4	55948611	55949111
chr4	70993342	70993842
chr4	113181558	113182058
chr4	139734785	139735285
chr4	154550190	154550690
chr5	10441624	10442124
chr5	16936188	16936688
chr5	34007881	34008381
chr5	54517490	54517990
chr5	76402981	76403481
chr5	115841653	115842153
chr5	128083441	128083941
chr5	134874060	134874560
chr5	140401496	140401996
chr5	151080875	151081375
chr5	157731494	157731994
chr5	176416370	176416870
chr5	176630339	176630839
chr5	177426200	177426700
chr5	179858693	179859193
chr6	10722753	10723253
chr6	16761468	16761968
chr6	19804571	19805071
chr6	30571104	30571604
chr6	30717173	30717673
chr6	31902040	31902540
chr6	33410132	33410632
chr6	36197033	36197533
chr6	42745851	42746351
chr6	46652663	46653163
chr6	52284724	52285224
chr6	53359192	53359692
chr6	69796764	69797264
chr6	81753178	81753678
chr6	88963470	88963970
chr6	104859640	104860140
chr6	106086077	106086577
chr6	108074566	108075066
chr6	108559449	108559949
chr6	136550247	136550747
chr6	138773492	138773992
chr6	138988055	138988555
chr6	152982992	152983492
chr6	154733963	154734463
chr6	155314281	155314781
chr6	158168047	158168547
chr6	158999598	159000098
chr6	167826548	167827048
chr7	1742084	1742584
chr7	30504661	30505161
chr7	32942981	32943481
chr7	44123318	44123818
chr7	64307120	64307620
chr7	66075507	66076007
chr7	73557029	73557529
[truncated: 190,050 more rows]

## Sheet: HC peakSet
The genomic coordinates of the peaks in HC class
Chromosome	Start	End
chr1	1375171	1375671
chr1	6785068	6785568
chr1	9910328	9910828
chr1	16613339	16613839
chr1	16904680	16905180
chr1	33080810	33081310
chr1	44674300	44674800
chr1	58783839	58784339
chr1	67684869	67685369
chr1	110338603	110339103
chr1	151281884	151282384
chr1	154974232	154974732
chr1	169485770	169486270
chr1	172532722	172533222
chr1	174999627	175000127
chr1	180631688	180632188
chr1	184754706	184755206
chr1	185156866	185157366
chr1	207822582	207823082
chr1	211579054	211579554
chr1	212284953	212285453
chr1	212608312	212608812
chr1	221741978	221742478
chr1	228139789	228140289
chr1	230978687	230979187
chr1	235504374	235504874
chr1	236794971	236795471
chr1	243255626	243256126
chr1	244451771	244452271
chr1	244652594	244653094
chr2	9630848	9631348
chr2	20305285	20305785
chr2	20446748	20447248
chr2	26345696	26346196
chr2	30146431	30146931
chr2	36966499	36966999
chr2	44168294	44168794
chr2	48314145	48314645
chr2	54723237	54723737
chr2	55050342	55050842
chr2	55617571	55618071
chr2	61538173	61538673
chr2	62705384	62705884
chr2	64751137	64751637
chr2	69914373	69914873
chr2	153871515	153872015
chr2	177212300	177212800
chr2	191677753	191678253
chr2	197453054	197453554
chr2	197499693	197500193
chr2	200811588	200812088
chr2	207166003	207166503
chr2	219543707	219544207
chr2	239400809	239401309
chr3	14948222	14948722
chr3	33440276	33440776
chr3	38024868	38025368
chr3	48556654	48557154
chr3	48663869	48664369
chr3	50299340	50299840
chr3	100401197	100401697
chr3	105868831	105869331
chr3	108222265	108222765
chr3	155870250	155870750
chr3	160755274	160755774
chr3	184561424	184561924
chr3	195442878	195443378
chr4	337389	337889
chr4	473989	474489
chr4	781727	782227
chr4	1346837	1347337
chr4	6269480	6269980
chr4	37686242	37686742
chr4	39527376	39527876
chr4	52712053	52712553
chr4	52722200	52722700
chr4	86593994	86594494
chr4	101347431	101347931
chr4	129093399	129093899
chr4	148442408	148442908
chr4	165112669	165113169
chr4	165327258	165327758
chr4	173334285	173334785
chr5	34929092	34929592
chr5	41903915	41904415
chr5	61331879	61332379
chr5	75336686	75337186
chr5	81750950	81751450
chr5	90529495	90529995
chr5	108748478	108748978
chr5	127030370	127030870
chr5	131796954	131797454
chr5	132866278	132866778
chr5	137754210	137754710
chr5	138464840	138465340
chr5	140401324	140401824
chr5	151771544	151772044
chr5	160119362	160119862
chr5	173887929	173888429
chr6	70413117	70413617
chr6	71420625	71421125
chr6	89080399	89080899
chr6	93419391	93419891
chr6	111873230	111873730
chr6	151452057	151452557
chr6	166627096	166627596
chr7	7640391	7640891
chr7	27662760	27663260
chr7	30284218	30284718
chr7	36152768	36153268
chr7	44606595	44607095
chr7	75738951	75739451
chr7	76379817	76380317
chr7	77122237	77122737
chr7	77536690	77537190
chr7	77696081	77696581
chr7	77798428	77798928
chr7	105012859	105013359
chr7	107168418	107168918
chr7	108525969	108526469
chr7	108569544	108570044
chr7	112206201	112206701
chr7	112450129	112450629
chr7	138002048	138002548
chr7	151028153	151028653
chr8	28889948	28890448
chr8	30082946	30083446
chr8	61714451	61714951
chr8	66667080	66667580
chr8	100721948	100722448
chr8	108443273	108443773
chr8	109333994	109334494
chr8	123416233	123416733
chr9	4792488	4792988
chr9	15422507	15423007
chr9	20683944	20684444
chr9	70418783	70419283
chr9	71911003	71911503
chr9	72365123	72365623
chr9	79571455	79571955
chr9	83980076	83980576
chr9	86282353	86282853
chr9	92764783	92765283
chr9	136790751	136791251
chr9	137240916	137241416
chr10	70170367	70170867
chr10	72273594	72274094
chr10	72297837	72298337
chr10	74826195	74826695
chr10	102501996	102502496
chr10	102917972	102918472
chr10	118754894	118755394
chr10	132537337	132537837
chr11	694989	695489
chr11	3797522	3798022
chr11	9460585	9461085
chr11	18634256	18634756
chr11	43680383	43680883
chr11	45847170	45847670
chr11	64185631	64186131
chr11	64878443	64878943
chr11	65615204	65615704
chr11	83156570	83157070
chr11	106077151	106077651
chr11	123062018	123062518
chr11	125111605	125112105
chr12	53079229	53079729
chr12	53379578	53380078
chr12	57752243	57752743
chr12	71663642	71664142
chr12	76084551	76085051
chr12	82358564	82359064
chr12	89709473	89709973
chr12	92145678	92146178
chr12	95217326	95217826
chr12	109713403	109713903
chr12	112125211	112125711
chr13	19958346	19958846
chr13	26557314	26557814
chr13	27620415	27620915
chr13	35476463	35476963
chr13	44436652	44437152
chr13	49443956	49444456
chr13	51583948	51584448
chr13	67230165	67230665
chr13	97432793	97433293
chr13	110712921	110713421
chr14	23301645	23302145
chr14	35826052	35826552
chr14	49620464	49620964
chr14	49862707	49863207
chr14	52552367	52552867
chr14	59188293	59188793
chr14	63543152	63543652
chr14	70809479	70809979
chr14	77616555	77617055
chr14	91060483	91060983
chr14	99480960	99481460
chr15	81324068	81324568
chr15	97960194	97960694
chr16	589321	589821
chr16	2882512	2883012
chr16	2905682	2906182
chr16	30658046	30658546
chr16	30948124	30948624
chr16	50741695	50742195
chr16	58499829	58500329
chr16	67183451	67183951
chr16	67806402	67806902
chr17	1716164	1716664
chr17	4967190	4967690
chr17	7572439	7572939
chr17	14300695	14301195
chr17	17972322	17972822
chr17	21284347	21284847
chr17	46193824	46194324
chr17	48047921	48048421
chr17	49764076	49764576
chr17	68457511	68458011
chr17	76671578	76672078
chr17	77958258	77958758
chr17	82022831	82023331
chr17	82458373	82458873
chr18	9475140	9475640
chr18	32092287	32092787
chr18	50287692	50288192
chr18	57398187	57398687
chr18	57435032	57435532
chr18	62522745	62523245
chr18	62714842	62715342
chr18	74291842	74292342
chr18	74495900	74496400
chr18	79068923	79069423
chr19	1268970	1269470
chr19	1490740	1491240
chr19	2096425	2096925
chr19	4471768	4472268
chr19	4791175	4791675
chr19	5904242	5904742
chr19	6425089	6425589
chr19	18522129	18522629
chr19	38850218	38850718
chr19	42268226	42268726
chr19	42268745	42269245
chr19	44890739	44891239
chr19	45178128	45178628
chr19	46661226	46661726
chr19	49676625	49677125
chr19	49766384	49766884
chr19	50658092	50658592
chr19	54159627	54160127
chr19	54189675	54190175
chr19	54190583	54191083
chr19	55339201	55339701
chr20	35742089	35742589
chr20	41028432	41028932
chr21	14383058	14383558
chr21	28992719	28993219
chr21	33642095	33642595
chr21	36156268	36156768
chr21	42496138	42496638
chr21	42974053	42974553
chrX	15854623	15855123
chr1	2227601	2228101
chr1	7704393	7704893
chr1	9539076	9539576
chr1	10210182	10210682
chr1	15524272	15524772
chr1	16644474	16644974
chr1	16913750	16914250
chr1	27725508	27726008
chr1	32394314	32394814
chr1	33036720	33037220
chr1	36149421	36149921
chr1	42682050	42682550
chr1	53945726	53946226
chr1	70410908	70411408
chr1	85276438	85276938
chr1	88992679	88993179
chr1	90717876	90718376
chr1	110963812	110964312
chr1	113389966	113390466
chr1	150629016	150629516
chr1	151146502	151147002
chr1	154183079	154183579
chr1	167721709	167722209
chr1	171781192	171781692
chr1	186375142	186375642
chr1	205813055	205813555
chr1	207751754	207752254
chr1	226939958	226940458
chr1	228165863	228166363
chr1	228457689	228458189
chr1	235866854	235867354
chr1	236281863	236282363
chr1	248837852	248838352
chr2	676658	677158
chr2	24076276	24076776
chr2	27086478	27086978
chr2	27370130	27370630
chr2	28751576	28752076
chr2	48440473	48440973
chr2	61471003	61471503
chr2	65056033	65056533
chr2	85595386	85595886
chr2	96265783	96266283
chr2	96815944	96816444
chr2	112054072	112054572
chr2	112645542	112646042
chr2	128027157	128027657
chr2	135985369	135985869
chr2	152717299	152717799
chr2	154697251	154697751
chr2	162343789	162344289
chr2	173965162	173965662
chr2	178450983	178451483
chr2	192194809	192195309
chr2	203014402	203014902
chr2	207711260	207711760
chr2	218269993	218270493
chr2	218963166	218963666
chr2	222860757	222861257
chr2	231781072	231781572
chr2	238060616	238061116
chr3	9397235	9397735
chr3	31532257	31532757
chr3	38136996	38137496
chr3	38164854	38165354
chr3	49786388	49786888
chr3	61251261	61251761
chr3	66500907	66501407
chr3	75435013	75435513
chr3	88058786	88059286
chr3	101724653	101725153
chr3	101849131	101849631
chr3	107522669	107523169
chr3	120094782	120095282
chr3	125915733	125916233
chr3	130111352	130111852
chr3	131381378	131381878
chr3	132722664	132723164
chr3	136752190	136752690
chr3	150546320	150546820
chr3	150762995	150763495
chr3	170222134	170222634
chr3	185937835	185938335
chr3	186108985	186109485
chr3	186570222	186570722
chr4	2261947	2262447
chr4	2536154	2536654
chr4	3074297	3074797
chr4	6783469	6783969
chr4	48341079	48341579
chr4	73069606	73070106
chr4	75673235	75673735
chr4	75724262	75724762
chr4	82900421	82900921
chr4	102827865	102828365
chr4	102868675	102869175
chr4	107720141	107720641
chr4	107989506	107990006
chr4	112231432	112231932
chr4	119212359	119212859
chr4	122732275	122732775
chr4	127965074	127965574
chr4	139453520	139454020
chr4	140523811	140524311
chr4	143513157	143513657
chr4	152779639	152780139
chr4	155758709	155759209
chr4	169620191	169620691
chr4	173370557	173371057
chr4	176319596	176320096
chr4	183658995	183659495
chr4	185209255	185209755
chr5	32312865	32313365
chr5	33440596	33441096
chr5	43121244	43121744
chr5	43313371	43313871
chr5	55994793	55995293
chr5	75511505	75512005
chr5	109409806	109410306
chr5	116574553	116575053
chr5	141636686	141637186
chr5	141756043	141756543
chr5	146182499	146182999
chr5	146203291	146203791
chr5	151252717	151253217
chr5	168579522	168580022
chr5	176416385	176416885
chr5	176619097	176619597
chr5	177426166	177426666
chr6	11093500	11094000
chr6	11537296	11537796
chr6	26123771	26124271
chr6	31620273	31620773
chr6	36593978	36594478
chr6	43013763	43014263
chr6	43769855	43770355
chr6	52419904	52420404
chr6	52995096	52995596
chr6	62286011	62286511
chr6	63572117	63572617
chr6	79537280	79537780
chr6	85678554	85679054
chr6	89352547	89353047
chr6	107459443	107459943
chr6	108559526	108560026
chr6	109009394	109009894
chr6	110874414	110874914
chr6	116279696	116280196
chr6	138773493	138773993
chr6	152982938	152983438
chr6	159789506	159790006
chr7	2631492	2631992
chr7	21427202	21427702
chr7	30172968	30173468
chr7	35800784	35801284
chr7	38177904	38178404
chr7	39949425	39949925
chr7	44082391	44082891
chr7	44123384	44123884
chr7	44848023	44848523
chr7	66628505	66629005
chr7	76359070	76359570
chr7	87152189	87152689
chr7	87345327	87345827
chr7	91264215	91264715
chr7	100586243	100586743
chr7	100673186	100673686
chr7	105013414	105013914
chr7	112450630	112451130
chr7	112939635	112940135
chr7	120950404	120950904
chr7	127651743	127652243
chr7	129224601	129225101
chr7	135211391	135211891
chr7	139359525	139360025
chr7	150379007	150379507
chr7	151519877	151520377
chr7	155297484	155297984
chr8	8227780	8228280
chr8	13133110	13133610
chr8	25458278	25458778
chr8	38996485	38996985
chr8	42152554	42153054
chr8	66428622	66429122
chr8	73972033	73972533
chr8	92965893	92966393
chr8	93916573	93917073
chr8	103414909	103415409
chr8	123274479	123274979
chr8	126558259	126558759
chr8	133297096	133297596
chr8	133571822	133572322
chr8	143609494	143609994
chr8	144104094	144104594
chr9	2014905	2015405
chr9	4679277	4679777
chr9	5628771	5629271
chr9	6412883	6413383
chr9	33264580	33265080
chr9	34458365	34458865
chr9	34989319	34989819
chr9	35604062	35604562
chr9	74496996	74497496
chr9	100098870	100099370
chr9	113221212	113221712
chr9	113593715	113594215
chr9	122905138	122905638
chr9	127396646	127397146
chr9	128067850	128068350
chr9	129080678	129081178
chr9	137200616	137201116
chr9	137459127	137459627
chr10	1048755	1049255
chr10	3172612	3173112
chr10	5889862	5890362
chr10	6202626	6203126
chr10	15168412	15168912
chr10	24724482	24724982
chr10	31759922	31760422
chr10	69123838	69124338
chr10	70146483	70146983
chr10	70403798	70404298
chr10	97640374	97640874
chr10	102642002	102642502
chr10	110919060	110919560
chr11	568249	568749
chr11	2400075	2400575
chr11	3160219	3160719
chr11	6234641	6235141
chr11	10808710	10809210
chr11	10857886	10858386
chr11	31810950	31811450
chr11	59615898	59616398
chr11	62573835	62574335
chr11	62753994	62754494
chr11	64241127	64241627
chr11	75814862	75815362
chr11	77994614	77995114
chr11	83071635	83072135
chr11	94493668	94494168
chr11	106022129	106022629
chr11	111926975	111927475
chr11	113314295	113314795
chr11	115504235	115504735
chr11	130069509	130070009
chr11	133956758	133957258
chr12	6555870	6556370
chr12	6663058	6663558
chr12	6764100	6764600
chr12	6852164	6852664
chr12	8026470	8026970
chr12	26938111	26938611
chr12	27523853	27524353
chr12	31728865	31729365
chr12	49110696	49111196
chr12	50111640	50112140
chr12	53054248	53054748
chr12	54280371	54280871
chr12	55817655	55818155
chr12	55973646	55974146
chr12	88141968	88142468
chr12	92929166	92929666
chr12	93441873	93442373
chr12	96035478	96035978
chr12	98593358	98593858
chr12	103929887	103930387
chr12	106774294	106774794
chr12	113221022	113221522
chr12	118372739	118373239
chr12	120087005	120087505
chr12	120686739	120687239
chr12	122225925	122226425
chr13	28718787	28719287
chr13	30617505	30618005
chr13	44141778	44142278
chr13	45341006	45341506
chr13	51452909	51453409
chr13	60163775	60164275
chr13	97222012	97222512
chr13	100674688	100675188
chr13	102596633	102597133
chr13	109786383	109786883
chr13	110715252	110715752
chr13	110915028	110915528
chr14	20461477	20461977
chr14	21269488	21269988
chr14	21455947	21456447
chr14	23006986	23007486
chr14	23320935	23321435
chr14	24442083	24442583
chr14	31026351	31026851
chr14	33950873	33951373
chr14	44896876	44897376
chr14	44961868	44962368
chr14	45134308	45134808
chr14	49868124	49868624
chr14	50311989	50312489
chr14	52729740	52730240
chr14	63641784	63642284
chr14	73458427	73458927
chr14	74084306	74084806
chr14	74493218	74493718
chr14	75294065	75294565
chr14	77321167	77321667
chr14	81533663	81534163
chr14	99683822	99684322
chr14	101947917	101948417
chr14	103333853	103334353
chr14	103715408	103715908
chr14	104752470	104752970
chr15	31326334	31326834
chr15	31353456	31353956
chr15	39782325	39782825
chr15	45279039	45279539
chr15	72474027	72474527
chr15	75451530	75452030
chr15	85794703	85795203
chr15	89087973	89088473
chr15	92904139	92904639
chr15	100341890	100342390
chr16	1342930	1343430
chr16	1782481	1782981
chr16	2155273	2155773
chr16	9091240	9091740
chr16	20900556	20901056
chr16	22190371	22190871
chr16	27549802	27550302
chr16	28950561	28951061
chr16	30370539	30371039
chr16	30378112	30378612
chr16	53503165	53503665
chr16	56931797	56932297
chr16	68448358	68448858
chr16	87392005	87392505
chr16	89490488	89490988
chr16	90077173	90077673
chr17	7614933	7615433
chr17	8630750	8631250
chr17	14309241	14309741
chr17	28041366	28041866
chr17	28335308	28335808
chr17	28952294	28952794
chr17	41688501	41689001
chr17	42388337	42388837
chr17	44186612	44187112
chr17	47895736	47896236
chr17	57662906	57663406
chr17	58517763	58518263
chr17	59331368	59331868
chr17	63621888	63622388
chr17	63773519	63774019
chr17	75154375	75154875
chr17	81238894	81239394
chr17	82698602	82699102
chr18	9136308	9136808
chr18	12377130	12377630
chr18	26090643	26091143
chr18	32470693	32471193
chr18	59139500	59140000
chr18	59359134	59359634
chr18	62186940	62187440
chr19	680328	680828
chr19	1652722	1653222
chr19	2944852	2945352
chr19	3505913	3506413
chr19	4402191	4402691
chr19	6737366	6737866
chr19	8389999	8390499
chr19	10717699	10718199
chr19	11435025	11435525
chr19	12333527	12334027
chr19	12938218	12938718
chr19	14136658	14137158
chr19	14529215	14529715
chr19	17470046	17470546
chr19	18203896	18204396
chr19	18281428	18281928
chr19	19385419	19385919
chr19	19776313	19776813
chr19	32675004	32675504
chr19	35702254	35702754
chr19	35757764	35758264
chr19	36054133	36054633
chr19	40465673	40466173
chr19	41263908	41264408
chr19	42242603	42243103
chr19	45584239	45584739
chr19	45692289	45692789
chr19	45995096	45995596
chr19	47048469	47048969
chr19	47515058	47515558
chr19	48468949	48469449
chr19	49869308	49869808
chr19	50329070	50329570
chr19	50724715	50725215
chr19	52189533	52190033
chr19	54137354	54137854
chr20	325148	325648
chr20	17682113	17682613
chr20	18507584	18508084
chr20	23361834	23362334
chr20	45857232	45857732
chr20	62238118	62238618
chr21	33479892	33480392
chr21	33542676	33543176
chr21	33641561	33642061
chr21	37267329	37267829
chr22	29603222	29603722
chr22	30423837	30424337
chr22	36387860	36388360
chr22	38705229	38705729
chr22	41951884	41952384
chr22	46035656	46036156
chrX	3814839	3815339
chrX	44872712	44873212
chr1	23344201	23344701
chr1	23368160	23368660
chr1	24642829	24643329
chr1	26233844	26234344
chr1	27914570	27915070
chr1	31644702	31645202
chr1	36306805	36307305
chr1	40040335	40040835
chr1	43649783	43650283
chr1	94418096	94418596
chr1	149886563	149887063
chr1	153727629	153728129
chr1	153922870	153923370
chr1	156500649	156501149
chr1	156767064	156767564
chr1	160098813	160099313
chr1	169105988	169106488
chr1	205227632	205228132
chr1	241519559	241520059
chr1	246566145	246566645
chr2	24047219	24047719
chr2	24971752	24972252
chr2	25878382	25878882
chr2	63840626	63841126
chr2	73233161	73233661
chr2	74458012	74458512
chr2	96857826	96858326
chr2	112275230	112275730
chr2	128027927	128028427
chr2	130342564	130343064
chr2	144332355	144332855
chr2	158456515	158457015
chr2	172555698	172556198
chr2	190880482	190880982
chr2	200963484	200963984
chr2	224585418	224585918
chr2	231706887	231707387
chr2	231708114	231708614
chr2	240820090	240820590
chr3	5187282	5187782
chr3	8501401	8501901
chr3	9396719	9397219
chr3	9731065	9731565
chr3	12810179	12810679
chr3	12905313	12905813
chr3	25664708	25665208
chr3	42590553	42591053
chr3	43621852	43622352
chr3	50235830	50236330
chr3	51941792	51942292
chr3	52057204	52057704
chr3	84958681	84959181
chr3	98522699	98523199
chr3	98901567	98902067
chr3	111674337	111674837
chr3	120094242	120094742
chr3	141231423	141231923
chr3	156554952	156555452
chr3	156674185	156674685
chr3	184174438	184174938
chr3	197736778	197737278
chr4	8158648	8159148
chr4	13484169	13484669
chr4	15002050	15002550
chr4	17810566	17811066
chr4	39182096	39182596
chr4	42656906	42657406
chr4	47914499	47914999
chr4	48780178	48780678
chr4	48830795	48831295
chr4	55395615	55396115
chr4	56435391	56435891
chr4	83034827	83035327
chr4	119454412	119454912
chr4	139082788	139083288
chr4	139177866	139178366
chr4	139280014	139280514
chr4	155376611	155377111
chr4	162163809	162164309
chr4	165378783	165379283
chr5	6868181	6868681
chr5	36151712	36152212
chr5	54310413	54310913
chr5	62403695	62404195
chr5	83077215	83077715
chr5	90409548	90410048
chr5	91380789	91381289
chr5	91383231	91383731
chr5	115544536	115545036
chr5	133051672	133052172
chr5	147782508	147783008
chr5	176537683	176538183
chr5	176647045	176647545
chr5	177457505	177458005
chr5	178153811	178154311
chr5	179732486	179732986
chr6	2765055	2765555
chr6	3118393	3118893
chr6	15245454	15245954
chr6	32195378	32195878
chr6	33249046	33249546
chr6	33322892	33323392
chr6	36197037	36197537
chr6	43170930	43171430
chr6	108558328	108558828
chr6	110815293	110815793
chr6	116571038	116571538
chr6	118893778	118894278
chr6	143843011	143843511
chr6	155314292	155314792
chr6	166382835	166383335
chr6	170553993	170554493
chr7	1044195	1044695
chr7	6104427	6104927
chr7	7182334	7182834
chr7	7968421	7968921
chr7	21427752	21428252
chr7	23105522	23106022
chr7	35694935	35695435
chr7	72828010	72828510
chr7	73522140	73522640
chr7	92134261	92134761
chr7	100538823	100539323
chr7	127585392	127585892
chr7	129952716	129953216
chr7	134646459	134646959
chr7	137846678	137847178
chr7	138459870	138460370
chr7	139341496	139341996
chr7	151057766	151058266
chr7	152463701	152464201
chr7	158829334	158829834
chr8	9555603	9556103
chr8	38386174	38386674
chr8	51898956	51899456
chr8	56211219	56211719
chr8	63168257	63168757
chr8	70401875	70402375
chr8	73878694	73879194
chr8	80030050	80030550
chr8	109539389	109539889
chr8	116766213	116766713
chr8	119873430	119873930
chr8	123072342	123072842
chr8	124998208	124998708
chr8	144326689	144327189
chr8	144827105	144827605
chr9	15307121	15307621
chr9	36190515	36191015
chr9	37422391	37422891
chr9	94165900	94166400
chr9	109119773	109120273
chr9	113401174	113401674
chr9	120714335	120714835
chr9	121201699	121202199
chr9	125241142	125241642
chr9	127245020	127245520
chr9	127980890	127981390
chr9	132354879	132355379
chr9	136886127	136886627
chr10	931568	932068
chr10	3785171	3785671
chr10	5813243	5813743
chr10	12068544	12069044
chr10	14837865	14838365
chr10	16817297	16817797
chr10	22003510	22004010
chr10	23438735	23439235
chr10	25016286	25016786
chr10	28302879	28303379
chr10	48306411	48306911
chr10	68900937	68901437
chr10	71279073	71279573
chr10	84139165	84139665
chr10	97498581	97499081
chr10	99620527	99621027
chr10	100912607	100913107
chr10	102245090	102245590
chr10	102502634	102503134
chr10	104268849	104269349
chr11	3379004	3379504
chr11	13668293	13668793
chr11	19712459	19712959
chr11	27472624	27473124
chr11	47408104	47408604
chr11	57667651	57668151
chr11	62831888	62832388
chr11	64305105	64305605
chr11	65487570	65488070
chr11	66677707	66678207
chr11	66958277	66958777
chr11	72112181	72112681
chr11	73761004	73761504
chr11	73779318	73779818
chr11	78188434	78188934
chr11	83286117	83286617
chr11	93741368	93741868
chr11	108222559	108223059
chr11	119381502	119382002
chr11	125592413	125592913
chr11	126268770	126269270
chr12	2812333	2812833
chr12	6851147	6851647
chr12	8949761	8950261
chr12	13000108	13000608
chr12	21501419	21501919
chr12	25385983	25386483
chr12	45728761	45729261
chr12	53451702	53452202
chr12	53500650	53501150
chr12	56300208	56300708
chr12	56636682	56637182
chr12	57078612	57079112
chr12	67268980	67269480
chr12	82686581	82687081
chr12	109291295	109291795
chr12	119988626	119989126
chr12	120317428	120317928
chr12	122526837	122527337
chr12	123232943	123233443
chr13	19633302	19633802
chr13	19863520	19864020
chr13	23375489	23375989
chr13	23579058	23579558
chr13	52455139	52455639
chr13	73058661	73059161
chr13	95676813	95677313
chr14	20682560	20683060
chr14	22919155	22919655
chr14	24114465	24114965
chr14	24135791	24136291
chr14	24141411	24141911
chr14	24147106	24147606
chr14	34462099	34462599
chr14	54396574	54397074
chr14	61762124	61762624
chr14	88385395	88385895
chr14	90828004	90828504
chr14	100238544	100239044
chr14	105490945	105491445
chr15	23039416	23039916
chr15	42575290	42575790
chr15	43791940	43792440
chr15	44195071	44195571
chr15	58770965	58771465
chr15	74598192	74598692
chr15	76931388	76931888
chr15	80059334	80059834
chr15	84716231	84716731
chr15	90387872	90388372
chr15	92882177	92882677
chr16	1964688	1965188
chr16	2223197	2223697
chr16	4616107	4616607
chr16	11742689	11743189
chr16	30065412	30065912
chr16	46883999	46884499
chr16	53703722	53704222
chr16	66880216	66880716
chr16	67561912	67562412
chr16	67660599	67661099
chr16	75464526	75465026
chr16	81096239	81096739
chr16	87492843	87493343
chr17	7251807	7252307
chr17	17836132	17836632
chr17	18039066	18039566
chr17	18183189	18183689
chr17	21043170	21043670
chr17	28576767	28577267
chr17	41689152	41689652
chr17	45148055	45148555
chr17	47649403	47649903
chr17	48892320	48892820
chr17	64145629	64146129
chr17	74872957	74873457
chr17	81222890	81223390
chr18	12947608	12948108
chr18	12991010	12991510
chr18	21740427	21740927
chr18	51197650	51198150
chr18	63422276	63422776
chr18	67516623	67517123
chr18	79679204	79679704
chr18	79911708	79912208
chr18	80033991	80034491
chr19	797052	797552
chr19	1103707	1104207
chr19	2151537	2152037
chr19	4065767	4066267
chr19	4328224	4328724
chr19	4342571	4343071
chr19	4968711	4969211
chr19	8525572	8526072
chr19	10870893	10871393
chr19	11374768	11375268
chr19	13795009	13795509
chr19	13952053	13952553
chr19	14006265	14006765
chr19	14117622	14118122
chr19	14496063	14496563
chr19	15379639	15380139
chr19	15418876	15419376
chr19	16659975	16660475
chr19	18192607	18193107
chr19	18919308	18919808
chr19	32971860	32972360
chr19	35745227	35745727
chr19	35748240	35748740
chr19	37251506	37252006
chr19	38930608	38931108
chr19	39390979	39391479
chr19	40750424	40750924
chr19	40777882	40778382
chr19	42075699	42076199
chr19	45770461	45770961
chr19	46860012	46860512
chr19	48619103	48619603
chr19	48713971	48714471
chr19	49118967	49119467
chr19	49487163	49487663
chr19	49496009	49496509
chr19	49876475	49876975
chr19	50511172	50511672
chr19	55461548	55462048
chr20	310332	310832
chr20	347632	348132
chr20	5126493	5126993
chr20	10673804	10674304
chr20	33992995	33993495
chr20	34876021	34876521
chr20	62794147	62794647
chr21	31558954	31559454
chr21	45893973	45894473
chr22	19122305	19122805
chr22	20020765	20021265
chr22	21641937	21642437
chr22	21735802	21736302
chr22	35299894	35300394
chr22	37696630	37697130
chr22	40636586	40637086
chr22	41091390	41091890
chr22	41381552	41382052
chr22	41620884	41621384
chr22	42079399	42079899
chr22	49918293	49918793
chrX	16719312	16719812
chrX	41085032	41085532
chr1	1231820	1232320
chr1	2545854	2546354
chr1	2586308	2586808
chr1	5992287	5992787
chr1	7783754	7784254
chr1	17053848	17054348
chr1	18956607	18957107
chr1	20661317	20661817
chr1	25430534	25431034
chr1	32817275	32817775
chr1	33430853	33431353
chr1	35192984	35193484
chr1	38859553	38860053
chr1	42766921	42767421
chr1	43946389	43946889
chr1	45491014	45491514
chr1	54406252	54406752
chr1	67430218	67430718
chr1	89994837	89995337
chr1	93180286	93180786
chr1	109984414	109984914
chr1	113812192	113812692
chr1	116372918	116373418
chr1	150235915	150236415
chr1	155001955	155002455
chr1	155227349	155227849
chr1	167220430	167220930
chr1	182604199	182604699
chr1	202861414	202861914
chr1	216723268	216723768
chr1	228109142	228109642
chr1	228735173	228735673
chr1	234610827	234611327
chr1	235328101	235328601
chr1	246931722	246932222
chr2	20051518	20052018
chr2	25041832	25042332
chr2	32356902	32357402
chr2	42361341	42361841
chr2	43595855	43596355
chr2	46698775	46699275
chr2	54330593	54331093
chr2	65129996	65130496
chr2	68252477	68252977
chr2	74002380	74002880
chr2	88691318	88691818
chr2	112054977	112055477
chr2	120252477	120252977
chr2	158968376	158968876
chr2	170928866	170929366
chr2	197804248	197804748
chr2	201451468	201451968
chr2	207529655	207530155
chr2	217858440	217858940
chr2	231464318	231464818
chr2	241315508	241316008
chr3	9249429	9249929
chr3	13479959	13480459
chr3	42032952	42033452
chr3	45688918	45689418
chr3	48439933	48440433
chr3	51390862	51391362
chr3	52287535	52288035
chr3	57597163	57597663
chr3	93979809	93980309
chr3	114056331	114056831
chr3	115147078	115147578
chr3	119498215	119498715
chr3	121834896	121835396
chr3	128680555	128681055
chr3	155854319	155854819
chr3	167734764	167735264
chr3	169966474	169966974
chr3	179147824	179148324
chr3	183635356	183635856
chr3	184017733	184018233
chr4	124188	124688
chr4	1289557	1290057
chr4	7067971	7068471
chr4	26860383	26860883
chr4	47484995	47485495
chr4	51842730	51843230
chr4	77820038	77820538
chr4	82284708	82285208
chr4	87038765	87039265
chr4	88284513	88285013
chr4	99563514	99564014
chr4	113761598	113762098
chr4	127782014	127782514
chr4	185396293	185396793
chr5	693158	693658
chr5	1138192	1138692
chr5	79514336	79514836
chr5	80407761	80408261
chr5	87412805	87413305
chr5	91379997	91380497
chr5	96935659	96936159
chr5	108382197	108382697
chr5	112737591	112738091
chr5	138331724	138332224
chr5	138543162	138543662
chr5	149357672	149358172
chr5	150758480	150758980
chr5	151758445	151758945
chr5	154445667	154446167
chr5	157731488	157731988
chr5	172123248	172123748
chr5	172770979	172771479
chr5	173056973	173057473
chr6	2988390	2988890
chr6	10404231	10404731
chr6	16128749	16129249
chr6	18155093	18155593
chr6	24775105	24775605
chr6	26157687	26158187
chr6	28335407	28335907
chr6	30717208	30717708
chr6	31827382	31827882
chr6	31862617	31863117
chr6	32175937	32176437
chr6	32178004	32178504
chr6	33391403	33391903
chr6	33418000	33418500
chr6	34248883	34249383
chr6	43059266	43059766
chr6	43629057	43629557
chr6	44082897	44083397
chr6	57046370	57046870
chr6	70955840	70956340
chr6	73520979	73521479
chr6	80004273	80004773
chr6	80106382	80106882
chr6	81752518	81753018
chr6	81753172	81753672
chr6	90285501	90286001
chr6	116253874	116254374
chr6	125790663	125791163
chr6	151390323	151390823
chr6	154733914	154734414
chr6	158999575	159000075
chr6	162727593	162728093
chr7	4744977	4745477
chr7	5240127	5240627
chr7	16645878	16646378
chr7	23013910	23014410
chr7	25125194	25125694
chr7	27739860	27740360
chr7	30504647	30505147
chr7	33062912	33063412
chr7	66493341	66493841
chr7	66844724	66845224
chr7	76166427	76166927
chr7	98252006	98252506
chr7	100148526	100149026
chr7	100429017	100429517
chr7	100675444	100675944
chr7	100889621	100890121
chr7	102748603	102749103
chr7	107890859	107891359
chr7	123534483	123534983
chr7	124929745	124930245
chr7	133081953	133082453
chr7	140696411	140696911
chr8	11802324	11802824
chr8	26382753	26383253
chr8	27258220	27258720
chr8	60652072	60652572
chr8	78665783	78666283
chr8	79765158	79765658
chr8	93917554	93918054
chr8	100951817	100952317
chr8	101205545	101206045
chr8	102239176	102239676
chr8	117520397	117520897
chr8	118111673	118112173
chr8	124474452	124474952
chr8	144137480	144137980
chr9	3525783	3526283
chr9	5437655	5438155
chr9	19380027	19380527
chr9	35072473	35072973
chr9	35732269	35732769
chr9	36258291	36258791
chr9	75088131	75088631
chr9	85741811	85742311
chr9	86354253	86354753
chr9	90642670	90643170
chr9	92670022	92670522
chr9	99821539	99822039
chr9	101533516	101534016
chr9	109013356	109013856
chr9	111631047	111631547
chr9	124658117	124658617
chr9	124861809	124862309
chr9	127611866	127612366
chr9	127715482	127715982
chr9	129178085	129178585
chr9	136849140	136849640
chr10	12129385	12129885
chr10	13161210	13161710
chr10	32346104	32346604
chr10	60943991	60944491
chr10	68331702	68332202
chr10	73096647	73097147
chr10	73811699	73812199
chr10	73997736	73998236
chr10	78303161	78303661
chr10	84328240	84328740
chr10	95561208	95561708
chr10	102503616	102504116
chr10	110211040	110211540
chr10	119725692	119726192
chr10	131900387	131900887
chr11	207227	207727
chr11	535444	535944
chr11	1389445	1389945
chr11	16738302	16738802
chr11	64269876	64270376
chr11	64778592	64779092
chr11	65890328	65890828
chr11	66289012	66289512
chr11	71786830	71787330
chr11	85628203	85628703
chr11	95790177	95790677
chr11	101914981	101915481
chr11	108121291	108121791
chr11	119121201	119121701
chr12	6534178	6534678
chr12	22624842	22625342
chr12	25250942	25251442
chr12	30754794	30755294
chr12	46372596	46373096
chr12	48682101	48682601
chr12	49322791	49323291
chr12	52051087	52051587
chr12	53625863	53626363
chr12	54279568	54280068
chr12	57520347	57520847
chr12	69239291	69239791
chr12	71754506	71755006
chr12	100266874	100267374
chr12	107093632	107094132
chr12	108731370	108731870
chr12	123383812	123384312
chr12	125049455	125049955
chr12	132908274	132908774
chr12	133079965	133080465
chr13	25120648	25121148
chr13	26855023	26855523
chr13	29850440	29850940
chr13	30307293	30307793
chr13	30465775	30466275
chr13	31162124	31162624
chr13	31846423	31846923
chr13	44435003	44435503
chr13	49936184	49936684
chr13	72781779	72782279
chr14	20343132	20343632
chr14	24242437	24242937
chr14	26598184	26598684
chr14	39174820	39175320
chr14	55270999	55271499
chr14	58297976	58298476
chr14	61695074	61695574
chr14	71320064	71320564
chr14	77457483	77457983
chr14	81219153	81219653
chr14	88792710	88793210
chr14	95534675	95535175
chr14	101760375	101760875
chr15	40953050	40953550
chr15	41774146	41774646
chr15	42920704	42921204
chr15	43510596	43511096
chr15	44426907	44427407
chr15	52679145	52679645
chr15	52790087	52790587
chr15	64162957	64163457
chr15	73633281	73633781
chr15	75453817	75454317
chr15	77420073	77420573
chr15	82045944	82046444
chr15	89334665	89335165
chr15	90158097	90158597
chr15	101428717	101429217
chr16	3003803	3004303
chr16	22297051	22297551
chr16	30923108	30923608
chr16	57735412	57735912
chr16	68085078	68085578
chr16	74984940	74985440
chr16	84504487	84504987
chr17	7403919	7404419
chr17	7857337	7857837
chr17	7931837	7932337
chr17	8156383	8156883
chr17	8192070	8192570
chr17	29293941	29294441
chr17	41786618	41787118
chr17	42676910	42677410
chr17	46193232	46193732
chr17	47970719	47971219
chr17	50866236	50866736
chr17	57605150	57605650
chr17	60677508	60678008
chr17	75289259	75289759
chr17	81394961	81395461
chr17	81860739	81861239
chr18	9913661	9914161
chr18	35240721	35241221
chr18	48538739	48539239
chr18	63367031	63367531
chr19	1260724	1261224
chr19	1275223	1275723
chr19	2427653	2428153
chr19	2950510	2951010
chr19	5680441	5680941
chr19	5720032	5720532
chr19	7829833	7830333
chr19	7943600	7944100
chr19	9818967	9819467
chr19	9834898	9835398
chr19	10380481	10380981
chr19	17859555	17860055
chr19	18152756	18153256
chr19	19663545	19664045
chr19	35931425	35931925
chr19	38374402	38374902
chr19	41994045	41994545
chr19	48624051	48624551
chr19	48964989	48965489
chr19	48993220	48993720
chr19	49923078	49923578
chr19	50804779	50805279
chr19	51339640	51340140
chr19	55599424	55599924
chr19	56140865	56141365
chr19	56507490	56507990
chr19	58401077	58401577
chr20	20712687	20713187
chr20	41618242	41618742
chr20	50510031	50510531
chr21	25734772	25735272
chr21	36319869	36320369
chr21	39312268	39312768
chr21	42892941	42893441
chr22	23145059	23145559
chr22	36776162	36776662
chr22	37199252	37199752
chr22	37844175	37844675
chr22	38181651	38182151
chr22	38700785	38701285
chr22	40044345	40044845
chr22	40951377	40951877
chr22	41589768	41590268
chr22	42090639	42091139
chr22	43014986	43015486
chr22	50582741	50583241
chr1	1115941	1116441
chr1	3624614	3625114
chr1	3900576	3901076
chr1	6579682	6580182
chr1	6613355	6613855
chr1	7961291	7961791
chr1	25616239	25616739
chr1	28235782	28236282
chr1	30718166	30718666
chr1	53326103	53326603
chr1	65420164	65420664
chr1	87328233	87328733
chr1	109426242	109426742
chr1	150282091	150282591
chr1	150876485	150876985
chr1	153958442	153958942
chr1	155244485	155244985
chr1	174999124	174999624
chr1	192808699	192809199
chr1	193105220	193105720
chr1	193121687	193122187
chr1	228165289	228165789
chr1	247078567	247079067
chr2	8681717	8682217
chr2	20650962	20651462
chr2	46543922	46544422
chr2	55519369	55519869
chr2	63588634	63589134
chr2	70900317	70900817
chr2	74482820	74483320
chr2	74653950	74654450
chr2	88627293	88627793
chr2	135531125	135531625
chr2	159712193	159712693
chr2	165953670	165954170
chr2	169827184	169827684
chr2	178478384	178478884
chr2	200525814	200526314
chr2	208254941	208255441
chr2	210002263	210002763
chr2	218959344	218959844
chr2	226801021	226801521
chr2	237966582	237967082
chr2	240560962	240561462
chr3	27484248	27484748
chr3	42804325	42804825
chr3	49411947	49412447
chr3	49539838	49540338
chr3	50359399	50359899
chr3	66997932	66998432
chr3	97764497	97764997
chr3	99875931	99876431
chr3	101778905	101779405
chr3	120742325	120742825
chr3	123584894	123585394
chr3	130893786	130894286
chr3	140941549	140942049
chr3	141311634	141312134
chr3	157160046	157160546
chr3	158570877	158571377
chr3	167735405	167735905
chr3	197554659	197555159
chr4	932098	932598
chr4	8747389	8747889
chr4	8871907	8872407
chr4	17576847	17577347
chr4	82429276	82429776
chr4	83012761	83013261
chr4	86359852	86360352
chr4	88592116	88592616
chr4	98995408	98995908
chr4	120066686	120067186
chr4	121870261	121870761
chr4	140373306	140373806
chr4	152535910	152536410
chr4	158671963	158672463
chr4	159102801	159103301
chr4	183504303	183504803
chr5	5421978	5422478
chr5	31630859	31631359
chr5	57173463	57173963
chr5	60944854	60945354
chr5	69217493	69217993
chr5	80654796	80655296
chr5	96934570	96935070
chr5	98928741	98929241
chr5	98929423	98929923
chr5	112976460	112976960
chr5	115625911	115626411
chr5	119070736	119071236
chr5	163505333	163505833
chr5	172765128	172765628
chr5	179559378	179559878
chr5	179698594	179699094
chr5	180809933	180810433
chr6	15551699	15552199
chr6	20401448	20401948
chr6	26216509	26217009
chr6	28896109	28896609
chr6	31815200	31815700
chr6	32128072	32128572
chr6	35259224	35259724
chr6	35342203	35342703
chr6	41072888	41073388
chr6	44246796	44247296
chr6	53061641	53062141
chr6	73653822	73654322
chr6	75284676	75285176
chr6	79234485	79234985
chr6	83430852	83431352
chr6	107958092	107958592
chr6	116680794	116681294
chr6	133952902	133953402
chr6	157380896	157381396
chr6	159790117	159790617
chr6	166956389	166956889
chr7	2844215	2844715
chr7	5530426	5530926
chr7	6008939	6009439
chr7	35037526	35038026
chr7	44999788	45000288
chr7	56051434	56051934
chr7	65006531	65007031
chr7	66681852	66682352
chr7	66996457	66996957
chr7	67302280	67302780
chr7	76047859	76048359
chr7	76317958	76318458
chr7	79453628	79454128
chr7	87933981	87934481
chr7	99504347	99504847
chr7	100611843	100612343
chr7	106284810	106285310
chr7	117019969	117020469
chr7	134986224	134986724
chr7	139340419	139340919
chr7	143287998	143288498
chr7	149028612	149029112
chr7	149090518	149091018
chr7	151227043	151227543
chr7	155298787	155299287
chr8	27311154	27311654
chr8	30658077	30658577
chr8	42843128	42843628
chr8	79767659	79768159
chr8	86342186	86342686
chr8	94895456	94895956
chr8	96261651	96262151
chr8	102863998	102864498
chr8	123174067	123174567
chr8	123768133	123768633
chr8	142283825	142284325
chr8	143829154	143829654
chr8	144334061	144334561
chr8	144901317	144901817
chr9	20622307	20622807
chr9	34048984	34049484
chr9	35111427	35111927
chr9	35657727	35658227
chr9	35814805	35815305
chr9	37465252	37465752
chr9	85940807	85941307
chr9	96418243	96418743
chr9	96449817	96450317
chr9	97982954	97983454
chr9	107282772	107283272
chr9	113275397	113275897
chr9	120842783	120843283
chr9	124771094	124771594
chr9	131373333	131373833
chr10	17201201	17201701
chr10	37976514	37977014
chr10	44959418	44959918
chr10	71212341	71212841
chr10	89251664	89252164
chr10	95693815	95694315
chr10	100373216	100373716
chr10	101818359	101818859
chr10	104121738	104122238
chr10	110871521	110872021
chr10	119596941	119597441
chr11	560645	561145
chr11	859646	860146
chr11	6619255	6619755
chr11	19116817	19117317
chr11	31817790	31818290
chr11	33161339	33161839
chr11	62621843	62622343
chr11	62771093	62771593
chr11	65477367	65477867
chr11	65711987	65712487
chr11	65919042	65919542
chr11	66282337	66282837
chr11	66616249	66616749
chr11	68121249	68121749
chr11	68460367	68460867
chr11	74170910	74171410
chr11	76444508	76445008
chr11	77066605	77067105
chr11	103091956	103092456
chr11	111601975	111602475
chr11	118435984	118436484
chr11	130002321	130002821
chr12	752276	752776
chr12	6470508	6471008
chr12	6752909	6753409
chr12	8243352	8243852
chr12	15882101	15882601
chr12	32678995	32679495
chr12	49741200	49741700
chr12	53180341	53180841
chr12	53441389	53441889
chr12	53675964	53676464
chr12	55996924	55997424
chr12	56360050	56360550
chr12	56645847	56646347
chr12	76559594	76560094
chr12	105107460	105107960
chr12	108514842	108515342
chr12	110613799	110614299
chr13	32538593	32539093
chr13	77027004	77027504
chr13	99087488	99087988
chr13	102798816	102799316
chr13	106535497	106535997
chr14	21476863	21477363
chr14	22929277	22929777
chr14	23285914	23286414
chr14	35046007	35046507
chr14	64503412	64503912
chr14	76151648	76152148
chr14	77097911	77098411
chr14	92793953	92794453
chr14	99604156	99604656
chr14	103385073	103385573
chr15	33194594	33195094
chr15	40405445	40405945
chr15	41972385	41972885
chr15	72117907	72118407
chr15	76311224	76311724
chr15	92809048	92809548
chr15	98852212	98852712
chr15	99733262	99733762
chr16	18801463	18801963
chr16	23557164	23557664
chr16	30922463	30922963
chr16	46689075	46689575
chr16	53130441	53130941
chr16	57185961	57186461
chr16	67660092	67660592
chr16	68084461	68084961
chr16	68245026	68245526
chr16	72093525	72094025
chr16	75517140	75517640
chr16	84116630	84117130
chr16	87950792	87951292
chr17	7214859	7215359
chr17	7307284	7307784
chr17	7835332	7835832
chr17	12020522	12021022
chr17	13017837	13018337
chr17	15999484	15999984
chr17	17591593	17592093
chr17	19378108	19378608
chr17	36936488	36936988
chr17	41918882	41919382
chr17	42154864	42155364
chr17	44308260	44308760
chr17	45317012	45317512
chr17	49788972	49789472
chr17	70169136	70169636
chr17	75855276	75855776
chr17	76737271	76737771
chr17	77883975	77884475
chr17	78840668	78841168
chr17	83051586	83052086
chr18	21111685	21112185
chr18	57586467	57586967
chr18	70205792	70206292
chr19	1205335	1205835
chr19	1249471	1249971
chr19	2269134	2269634
chr19	8513938	8514438
chr19	8832619	8833119
chr19	10835552	10836052
chr19	14518453	14518953
chr19	36014090	36014590
chr19	38335584	38336084
chr19	39342040	39342540
chr19	40348205	40348705
chr19	40798766	40799266
chr19	49127945	49128445
chr19	49641771	49642271
chr19	58380938	58381438
chr20	3767698	3768198
chr20	3888957	3889457
chr20	13638714	13639214
chr20	32357895	32358395
chr20	34558388	34558888
chr20	34704448	34704948
chr20	35771725	35772225
chr20	44805851	44806351
chr20	44885381	44885881
chr20	59032186	59032686
chr20	63056158	63056658
chr21	31659383	31659883
chr21	34615053	34615553
chr21	37366362	37366862
chr21	39183237	39183737
chr22	20016696	20017196
chr22	20917040	20917540
chr22	39519916	39520416
chr22	41946642	41947142
chrX	20141753	20142253
chr1	7668406	7668906
chr1	8817478	8817978
chr1	10032525	10033025
chr1	15524793	15525293
chr1	23980135	23980635
chr1	26921409	26921909
chr1	35557485	35557985
chr1	36150717	36151217
chr1	36385859	36386359
chr1	41360850	41361350
chr1	42958684	42959184
chr1	45686882	45687382
chr1	66929898	66930398
chr1	70354516	70355016
chr1	86914239	86914739
chr1	100249676	100250176
chr1	112395883	112396383
chr1	113929267	113929767
chr1	145957828	145958328
chr1	151790336	151790836
chr1	154870132	154870632
chr1	154936730	154937230
chr1	154970546	154971046
chr1	155012037	155012537
chr1	156193723	156194223
chr1	156338108	156338608
chr1	159780593	159781093
chr1	161202031	161202531
chr1	169893719	169894219
chr1	173867902	173868402
chr1	179293470	179293970
chr1	182699673	182700173
chr1	183635587	183636087
chr1	185316049	185316549
chr1	206202922	206203422
chr1	208244166	208244666
chr1	226062415	226062915
chr1	244048164	244048664
chr1	247104171	247104671
chr2	3558147	3558647
chr2	10812625	10813125
chr2	46542341	46542841
chr2	65227447	65227947
chr2	70142459	70142959
chr2	71227016	71227516
chr2	99336199	99336699
chr2	99636554	99637054
chr2	101001958	101002458
chr2	152718300	152718800
chr2	159286529	159287029
chr2	168455997	168456497
chr2	175168199	175168699
chr2	177263401	177263901
chr2	200864476	200864976
chr2	216412126	216412626
chr2	231604557	231605057
chr2	241701744	241702244
chr3	9843807	9844307
chr3	14651351	14651851
chr3	23916776	23917276
chr3	28241253	28241753
chr3	32570674	32571174
chr3	37860333	37860833
chr3	40453036	40453536
chr3	47513216	47513716
chr3	48717115	48717615
chr3	49723768	49724268
chr3	49939756	49940256
chr3	50337286	50337786
chr3	57227479	57227979
chr3	66038733	66039233
chr3	113019471	113019971
chr3	125595326	125595826
chr3	171460261	171460761
chr3	172750435	172750935
chr3	180601891	180602391
chr3	185282693	185283193
chr3	190120712	190121212
chr3	195892541	195893041
chr4	2242033	2242533
chr4	6782402	6782902
chr4	41990271	41990771
chr4	82430227	82430727
chr4	99950227	99950727
chr4	102826953	102827453
chr4	113762426	113762926
chr4	118591471	118591971
chr4	128287636	128288136
chr4	145180431	145180931
chr4	147617064	147617564
chr4	151760862	151761362
chr4	157220441	157220941
chr5	55534882	55535382
chr5	65721953	65722453
chr5	68215465	68215965
chr5	71586989	71587489
chr5	81971713	81972213
chr5	125412678	125413178
chr5	128082870	128083370
chr5	128083427	128083927
chr5	134845725	134846225
chr5	138491898	138492398
chr5	142770063	142770563
chr5	171387521	171388021
chr5	178204202	178204702
chr6	2989376	2989876
chr6	2999440	2999940
chr6	10722781	10723281
chr6	10747410	10747910
chr6	26043535	26044035
chr6	26659543	26660043
chr6	27892991	27893491
chr6	30066925	30067425
chr6	30617210	30617710
chr6	31271912	31272412
chr6	31665679	31666179
chr6	33410090	33410590
chr6	36027492	36027992
chr6	43510138	43510638
chr6	52284715	52285215
chr6	85643129	85643629
chr6	87589800	87590300
chr6	89829454	89829954
chr6	116229215	116229715
chr6	125986266	125986766
chr6	132512916	132513416
chr6	136289734	136290234
chr6	144216239	144216739
chr6	159762133	159762633
chr7	6081240	6081740
chr7	6348708	6349208
chr7	12687269	12687769
chr7	26200656	26201156
chr7	45089174	45089674
chr7	66204987	66205487
chr7	66740433	66740933
chr7	74657259	74657759
chr7	87059494	87059994
chr7	100081589	100082089
chr7	101165475	101165975
chr7	103074614	103075114
chr7	107169629	107170129
chr7	122144095	122144595
chr7	140176955	140177455
chr7	140479208	140479708
chr8	18084141	18084641
chr8	19817962	19818462
chr8	27261612	27262112
chr8	28401837	28402337
chr8	37762354	37762854
chr8	66613230	66613730
chr8	77000064	77000564
chr8	86514125	86514625
chr8	94822967	94823467
chr8	98116951	98117451
chr8	124372573	124373073
chr8	140464474	140464974
chr8	144078354	144078854
chr8	144334970	144335470
chr8	144465678	144466178
chr9	26956128	26956628
chr9	33816749	33817249
chr9	34178716	34179216
chr9	35161767	35162267
chr9	83921302	83921802
chr9	84668181	84668681
chr9	89310599	89311099
chr9	101398396	101398896
chr9	105447737	105448237
chr9	122940622	122941122
chr9	125143368	125143868
chr9	127735099	127735599
chr9	128275798	128276298
chr9	129028274	129028774
chr10	25174456	25174956
chr10	26860792	26861292
chr10	28532517	28533017
chr10	31031664	31032164
chr10	31032184	31032684
chr10	46030408	46030908
chr10	74150888	74151388
chr10	79274571	79275071
chr10	123153956	123154456
chr10	132307845	132308345
chr11	9003840	9004340
chr11	13277175	13277675
chr11	17276371	17276871
chr11	61815119	61815619
chr11	64284499	64284999
chr11	64917109	64917609
chr11	66268208	66268708
chr11	67353398	67353898
chr11	73598001	73598501
chr11	82900234	82900734
chr11	86068913	86069413
chr11	86301944	86302444
chr11	113401675	113402175
chr11	119095356	119095856
chr11	119334197	119334697
chr11	134033927	134034427
chr12	2794694	2795194
chr12	14803320	14803820
chr12	27243886	27244386
chr12	45990398	45990898
chr12	51083391	51083891
chr12	53727344	53727844
chr12	54358997	54359497
chr12	56104217	56104717
chr12	56158059	56158559
chr12	68332196	68332696
chr12	79934914	79935414
chr12	93377553	93378053
chr12	100142684	100143184
chr12	109573368	109573868
chr12	116737992	116738492
chr12	118016350	118016850
chr12	124838015	124838515
chr13	29595550	29596050
chr13	49792825	49793325
chr13	52012005	52012505
chr14	31457209	31457709
chr14	49634111	49634611
chr14	50532409	50532909
chr14	59484167	59484667
chr14	66507817	66508317
chr14	68979191	68979691
chr14	75258947	75259447
chr14	75660704	75661204
chr14	94026077	94026577
chr14	94081002	94081502
chr14	100577814	100578314
chr14	103522636	103523136
chr15	28984947	28985447
chr15	42273222	42273722
chr15	44728829	44729329
chr15	45198519	45199019
chr15	66172196	66172696
chr15	69160315	69160815
chr15	72226668	72227168
chr15	74615427	74615927
chr15	74770979	74771479
chr15	74937814	74938314
chr15	83447111	83447611
chr15	90192153	90192653
chr15	99251050	99251550
chr15	100602139	100602639
chr16	1943135	1943635
chr16	4957994	4958494
chr16	22191081	22191581
chr16	56451165	56451665
chr16	81006961	81007461
chr16	89657499	89657999
chr16	89923055	89923555
chr17	2399461	2399961
chr17	3636133	3636633
chr17	7214221	7214721
chr17	8152335	8152835
chr17	18856001	18856501
chr17	36948682	36949182
chr17	40287517	40288017
chr17	45060885	45061385
chr17	49677890	49678390
chr17	63549999	63550499
chr17	63842766	63843266
chr17	68247654	68248154
chr17	75784446	75784946
chr17	76264871	76265371
chr18	14132313	14132813
chr18	23452939	23453439
chr18	35041171	35041671
chr18	36067333	36067833
chr18	54224476	54224976
chr18	56638505	56639005
chr19	2041907	2042407
chr19	2061393	2061893
chr19	2783249	2783749
chr19	6373153	6373653
chr19	7903394	7903894
chr19	11597153	11597653
chr19	12140162	12140662
chr19	12551347	12551847
chr19	16111401	16111901
chr19	17337236	17337736
chr19	38229581	38230081
chr19	38402788	38403288
chr19	39833449	39833949
chr19	39970824	39971324
chr19	42283566	42284066
chr19	43575465	43575965
chr19	43595916	43596416
chr19	45645380	45645880
chr19	45717202	45717702
chr19	48363944	48364444
chr19	48720569	48721069
chr19	49453262	49453762
chr19	49877776	49878276
chr19	55654264	55654764
chr19	56314943	56315443
chr20	31723444	31723944
chr20	45880906	45881406
[truncated: 179,829 more rows]

## Sheet: MG peakSet
The genomic coordinates of the peaks in MG class
Chromosome	Start	End
chr1	2227581	2228081
chr1	6784886	6785386
chr1	9539103	9539603
chr1	9910310	9910810
chr1	10210197	10210697
chr1	15524257	15524757
chr1	16904672	16905172
chr1	16913738	16914238
chr1	42958704	42959204
chr1	44674314	44674814
chr1	58783813	58784313
chr1	70410897	70411397
chr1	109984435	109984935
chr1	110339065	110339565
chr1	151281869	151282369
chr1	169485747	169486247
chr1	184754730	184755230
chr1	185156873	185157373
chr1	212284938	212285438
chr1	228139761	228140261
chr1	228165897	228166397
chr1	234610769	234611269
chr1	244652613	244653113
chr2	676661	677161
chr2	20446742	20447242
chr2	25041835	25042335
chr2	30146426	30146926
chr2	43100915	43101415
chr2	44168262	44168762
chr2	54723201	54723701
chr2	55050325	55050825
chr2	61538155	61538655
chr2	64751101	64751601
chr2	69914408	69914908
chr2	70142466	70142966
chr2	128027178	128027678
chr2	144332390	144332890
chr2	177212322	177212822
chr2	197453091	197453591
chr2	207166012	207166512
chr2	219543698	219544198
chr2	231708121	231708621
chr2	232519788	232520288
chr2	239401048	239401548
chr3	14948231	14948731
chr3	31532272	31532772
chr3	33440316	33440816
chr3	38024858	38025358
chr3	50235773	50236273
chr3	98901558	98902058
chr3	125915748	125916248
chr3	131381396	131381896
chr3	186108960	186109460
chr3	186570292	186570792
chr3	188052222	188052722
chr3	194271176	194271676
chr3	195442902	195443402
chr3	197736723	197737223
chr4	781746	782246
chr4	1346836	1347336
chr4	2262006	2262506
chr4	2536173	2536673
chr4	3955371	3955871
chr4	6269463	6269963
chr4	10106537	10107037
chr4	37686271	37686771
chr4	48780196	48780696
chr4	86593988	86594488
chr4	119454475	119454975
chr4	148442374	148442874
chr4	165112693	165113193
chr4	165327249	165327749
chr4	169620196	169620696
chr4	173334299	173334799
chr4	185396378	185396878
chr5	43121237	43121737
chr5	61331875	61332375
chr5	75336808	75337308
chr5	88141195	88141695
chr5	98773288	98773788
chr5	108748594	108749094
chr5	109409835	109410335
chr5	115544568	115545068
chr5	127030393	127030893
chr5	131796871	131797371
chr5	132490641	132491141
chr5	137754216	137754716
chr5	138464865	138465365
chr5	138543071	138543571
chr5	149960437	149960937
chr5	151771225	151771725
chr5	172771016	172771516
chr6	31827342	31827842
chr6	52284721	52285221
chr6	63572168	63572668
chr6	89080419	89080919
chr6	111873265	111873765
chr6	125749135	125749635
chr6	166627085	166627585
chr7	1459396	1459896
chr7	1537094	1537594
chr7	23013918	23014418
chr7	27662777	27663277
chr7	30284176	30284676
chr7	44606601	44607101
chr7	66628495	66628995
chr7	75738936	75739436
chr7	76317942	76318442
chr7	76359080	76359580
chr7	77122229	77122729
chr7	100586291	100586791
chr7	107168415	107168915
chr7	108526072	108526572
chr7	120950402	120950902
chr7	129224582	129225082
chr7	129434129	129434629
chr7	134646473	134646973
chr7	155297510	155298010
chr7	158829349	158829849
chr8	1456606	1457106
chr8	8227786	8228286
chr8	25458301	25458801
chr8	27614528	27615028
chr8	66428609	66429109
chr8	73972115	73972615
chr8	102238971	102239471
chr8	109334001	109334501
chr8	123416258	123416758
chr9	34989321	34989821
chr9	71911020	71911520
chr9	72365128	72365628
chr9	73426098	73426598
chr9	79571373	79571873
chr9	81689515	81690015
chr9	89310681	89311181
chr9	94165859	94166359
chr9	109119798	109120298
chr9	127396674	127397174
chr10	931587	932087
chr10	3107479	3107979
chr10	72273586	72274086
chr10	73997688	73998188
chr10	74826195	74826695
chr10	77872146	77872646
chr10	79445631	79446131
chr10	84244611	84245111
chr10	95561231	95561731
chr10	97498563	97499063
chr10	110919077	110919577
chr11	694993	695493
chr11	2400266	2400766
chr11	3797429	3797929
chr11	6234636	6235136
chr11	9460554	9461054
chr11	44565096	44565596
chr11	45847131	45847631
chr11	70270343	70270843
chr11	83156589	83157089
chr11	95231024	95231524
chr11	123062013	123062513
chr11	125111628	125112128
chr11	126268768	126269268
chr12	53079230	53079730
chr12	53379578	53380078
chr12	55973650	55974150
chr12	57520388	57520888
chr12	57752240	57752740
chr12	92145694	92146194
chr12	103929994	103930494
chr12	113221012	113221512
chr12	122225950	122226450
chr13	19958348	19958848
chr13	30617510	30618010
chr13	45341078	45341578
chr13	50124264	50124764
chr13	51452887	51453387
chr13	97432948	97433448
chr13	110914947	110915447
chr14	21269493	21269993
chr14	22929293	22929793
chr14	35826053	35826553
chr14	49862696	49863196
chr14	51094934	51095434
chr14	52552411	52552911
chr14	59188312	59188812
chr14	67619526	67620026
chr14	74084381	74084881
chr14	74493191	74493691
chr14	75660713	75661213
chr14	77616591	77617091
chr14	90383053	90383553
chr14	91060507	91061007
chr14	99481001	99481501
chr14	101947920	101948420
chr14	103715318	103715818
chr14	104752734	104753234
chr15	43791927	43792427
chr15	70099479	70099979
chr15	75451719	75452219
chr15	81324066	81324566
chr15	97960241	97960741
chr16	2155278	2155778
chr16	9091254	9091754
chr16	22190745	22191245
chr16	30658043	30658543
chr16	30922445	30922945
chr16	46689069	46689569
chr16	46883975	46884475
chr16	50741688	50742188
chr16	53503234	53503734
chr16	54929054	54929554
chr16	67806424	67806924
chr16	88856780	88857280
chr17	4967192	4967692
chr17	7572415	7572915
chr17	8156224	8156724
chr17	8630716	8631216
chr17	14300697	14301197
chr17	17496203	17496703
chr17	19378098	19378598
chr17	21043168	21043668
chr17	21284345	21284845
chr17	41786617	41787117
chr17	42388331	42388831
chr17	47895762	47896262
chr17	48047949	48048449
chr17	57662917	57663417
chr17	58517905	58518405
chr17	64919293	64919793
chr17	77958260	77958760
chr17	82022773	82023273
chr17	82458346	82458846
chr17	82698570	82699070
chr18	9475138	9475638
chr18	51197674	51198174
chr18	62522732	62523232
chr18	62714856	62715356
chr18	67516627	67517127
chr18	74495945	74496445
chr18	79068918	79069418
chr19	4402187	4402687
chr19	5904417	5904917
chr19	11374787	11375287
chr19	14117662	14118162
chr19	14529196	14529696
chr19	16659976	16660476
chr19	18192838	18193338
chr19	18203943	18204443
chr19	18281434	18281934
chr19	19063572	19064072
chr19	38850245	38850745
chr19	40750393	40750893
chr19	42075774	42076274
chr19	42268215	42268715
chr19	42268738	42269238
chr19	44890751	44891251
chr19	47048466	47048966
chr19	47515138	47515638
chr19	48468928	48469428
chr19	49676686	49677186
chr19	49766352	49766852
chr19	50658042	50658542
chr19	52189538	52190038
chr19	54137246	54137746
chr19	55339228	55339728
chr20	2162660	2163160
chr20	17682124	17682624
chr20	23361834	23362334
chr20	35742101	35742601
chr21	14383011	14383511
chr21	31558947	31559447
chr21	42496172	42496672
chr21	42892907	42893407
chr21	42974053	42974553
chr22	24588350	24588850
chr22	29603232	29603732
chr22	30423875	30424375
chr22	36387852	36388352
chr22	40636598	40637098
chr22	41448350	41448850
chr22	46035670	46036170
chr1	1115977	1116477
chr1	6446988	6447488
chr1	6613347	6613847
chr1	23344202	23344702
chr1	23368080	23368580
chr1	24642853	24643353
chr1	27725549	27726049
chr1	28247052	28247552
chr1	32394295	32394795
chr1	40040365	40040865
chr1	41360880	41361380
chr1	53945720	53946220
chr1	65420105	65420605
chr1	84690346	84690846
chr1	85276417	85276917
chr1	88992674	88993174
chr1	110963784	110964284
chr1	150629432	150629932
chr1	159780628	159781128
chr1	172532633	172533133
chr1	180631676	180632176
chr1	182391595	182392095
chr1	186375165	186375665
chr1	201170609	201171109
chr1	211579058	211579558
chr1	221741967	221742467
chr1	226939918	226940418
chr1	228165388	228165888
chr1	235504317	235504817
chr1	244048145	244048645
chr1	244451778	244452278
chr1	248837870	248838370
chr2	8681712	8682212
chr2	9630828	9631328
chr2	10812605	10813105
chr2	26345698	26346198
chr2	46698789	46699289
chr2	62705353	62705853
chr2	64989017	64989517
chr2	65129969	65130469
chr2	96265870	96266370
chr2	96857894	96858394
chr2	112275229	112275729
chr2	112645568	112646068
chr2	178450974	178451474
chr2	197499726	197500226
chr2	200811579	200812079
chr2	203014410	203014910
chr2	207769580	207770080
chr2	217653337	217653837
chr2	217714248	217714748
chr2	218270134	218270634
chr2	218745785	218746285
chr2	222860683	222861183
chr2	231464383	231464883
chr2	231604589	231605089
chr2	233387479	233387979
chr2	239121494	239121994
chr3	4986694	4987194
chr3	9397241	9397741
chr3	9731062	9731562
chr3	13479945	13480445
chr3	38136962	38137462
chr3	42590548	42591048
chr3	43621976	43622476
chr3	48465496	48465996
chr3	49007053	49007553
chr3	51941833	51942333
chr3	66500882	66501382
chr3	101849218	101849718
chr3	105868838	105869338
chr3	120094321	120094821
chr3	130111327	130111827
chr3	168095763	168096263
chr3	194218926	194219426
chr4	337413	337913
chr4	3074317	3074817
chr4	6281754	6282254
chr4	9691582	9692082
chr4	11428789	11429289
chr4	17577127	17577627
chr4	39527390	39527890
chr4	48340998	48341498
chr4	51842694	51843194
chr4	82284786	82285286
chr4	107720169	107720669
chr4	113761621	113762121
chr4	140523843	140524343
chr4	183658991	183659491
chr5	32312809	32313309
chr5	36241917	36242417
chr5	41903865	41904365
chr5	61408622	61409122
chr5	72308213	72308713
chr5	81750885	81751385
chr5	81971722	81972222
chr5	88551642	88552142
chr5	91280482	91280982
chr5	119268422	119268922
chr5	132866274	132866774
chr5	132963436	132963936
chr5	140401318	140401818
chr5	146182475	146182975
chr5	160119368	160119868
chr5	173887954	173888454
chr5	176647121	176647621
chr5	177426129	177426629
chr5	179559395	179559895
chr6	2245390	2245890
chr6	19804553	19805053
chr6	20401445	20401945
chr6	31862750	31863250
chr6	32195394	32195894
chr6	33322889	33323389
chr6	37169736	37170236
chr6	43170908	43171408
chr6	52995080	52995580
chr6	80004293	80004793
chr6	80106363	80106863
chr6	85643090	85643590
chr6	85678578	85679078
chr6	89829541	89830041
chr6	135497525	135498025
chr6	151452035	151452535
chr6	155314444	155314944
chr7	6104509	6105009
chr7	7640387	7640887
chr7	7968457	7968957
chr7	21427685	21428185
chr7	35800796	35801296
chr7	36152770	36153270
chr7	44123401	44123901
chr7	44847950	44848450
chr7	45768800	45769300
chr7	66493393	66493893
chr7	72828066	72828566
chr7	76379817	76380317
chr7	77696092	77696592
chr7	77798461	77798961
chr7	100429021	100429521
chr7	100538814	100539314
chr7	100612186	100612686
chr7	105012867	105013367
chr7	108569539	108570039
chr7	112206189	112206689
chr7	112450096	112450596
chr7	127651780	127652280
chr7	149028572	149029072
chr7	151057797	151058297
chr8	11802412	11802912
chr8	28889971	28890471
chr8	30082938	30083438
chr8	38996360	38996860
chr8	41528856	41529356
chr8	66667074	66667574
chr8	70401922	70402422
chr8	92965431	92965931
chr8	93916523	93917023
chr8	100721909	100722409
chr8	102412627	102413127
chr8	108443256	108443756
chr8	109539380	109539880
chr8	123274510	123275010
chr8	124474436	124474936
chr8	126558198	126558698
chr8	126635046	126635546
chr8	132775038	132775538
chr8	133297152	133297652
chr8	143609464	143609964
chr9	4792531	4793031
chr9	35111433	35111933
chr9	35603931	35604431
chr9	35657713	35658213
chr9	92764743	92765243
chr9	100098877	100099377
chr9	120714342	120714842
chr9	125143371	125143871
chr9	127980884	127981384
chr9	128275878	128276378
chr9	129413557	129414057
chr9	136790728	136791228
chr9	137240883	137241383
chr10	3172626	3173126
chr10	3785181	3785681
chr10	14837885	14838385
chr10	25016290	25016790
chr10	26860842	26861342
chr10	28302893	28303393
chr10	28677164	28677664
chr10	28897542	28898042
chr10	31032179	31032679
chr10	68900936	68901436
chr10	69123839	69124339
chr10	72297830	72298330
chr10	97687039	97687539
chr10	102917946	102918446
chr10	104268875	104269375
chr10	110211069	110211569
chr10	117804383	117804883
chr10	118754898	118755398
chr10	132537240	132537740
chr11	568283	568783
chr11	3422683	3423183
chr11	10808787	10809287
chr11	11621925	11622425
chr11	13668306	13668806
chr11	59615663	59616163
chr11	62753984	62754484
chr11	62831912	62832412
chr11	64185712	64186212
chr11	64241129	64241629
chr11	64778609	64779109
chr11	65615217	65615717
chr11	66616268	66616768
chr11	72103130	72103630
chr11	106022059	106022559
chr11	106077117	106077617
chr11	108222568	108223068
chr11	115504227	115504727
chr11	116114280	116114780
chr11	119095304	119095804
chr11	119121187	119121687
chr11	119381472	119381972
chr11	126062721	126063221
chr12	6852218	6852718
chr12	25250889	25251389
chr12	26938143	26938643
chr12	46372569	46373069
chr12	49869019	49869519
chr12	50111636	50112136
chr12	50167255	50167755
chr12	52032853	52033353
chr12	53492910	53493410
chr12	55817609	55818109
chr12	82686584	82687084
chr12	89709259	89709759
chr12	95217372	95217872
chr12	98593359	98593859
chr12	116737906	116738406
chr12	120086936	120087436
chr13	19863542	19864042
chr13	27620402	27620902
chr13	44141801	44142301
chr13	49443899	49444399
chr13	60163779	60164279
chr13	80341135	80341635
chr13	102596640	102597140
chr13	106535508	106536008
chr13	109786402	109786902
chr13	110715253	110715753
chr14	20343090	20343590
chr14	23285970	23286470
chr14	23301656	23302156
chr14	49620484	49620984
chr14	63641793	63642293
chr14	64540365	64540865
chr14	73026945	73027445
chr14	73458432	73458932
chr14	75237391	75237891
chr14	99604136	99604636
chr14	99683847	99684347
chr14	100192805	100193305
chr14	105490744	105491244
chr15	41972365	41972865
chr15	58770973	58771473
chr15	70097730	70098230
chr15	89088037	89088537
chr15	92904110	92904610
chr16	589669	590169
chr16	1782501	1783001
chr16	2882517	2883017
chr16	2905300	2905800
chr16	11742707	11743207
chr16	21520267	21520767
chr16	28950531	28951031
chr16	30378093	30378593
chr16	54930510	54931010
chr16	56931785	56932285
chr16	57735392	57735892
chr16	74984939	74985439
chr16	75517177	75517677
chr16	81096212	81096712
chr16	89490444	89490944
chr17	1716192	1716692
chr17	7251808	7252308
chr17	7614923	7615423
chr17	28335328	28335828
chr17	39225741	39226241
chr17	41689166	41689666
chr17	45060995	45061495
chr17	47649422	47649922
chr17	47970701	47971201
chr17	49764058	49764558
chr17	60677525	60678025
chr17	63621893	63622393
chr17	78840728	78841228
chr17	80959564	80960064
chr17	81222880	81223380
chr17	81512672	81513172
chr17	81860664	81861164
chr18	9136361	9136861
chr18	11980836	11981336
chr18	32470698	32471198
chr18	38459043	38459543
chr18	50468084	50468584
chr18	50878815	50879315
chr18	57398188	57398688
chr18	59139510	59140010
chr18	62186875	62187375
chr18	74291833	74292333
chr18	79679219	79679719
chr19	796986	797486
chr19	1268936	1269436
chr19	1490762	1491262
chr19	2151559	2152059
chr19	2944829	2945329
chr19	4791135	4791635
chr19	4968688	4969188
chr19	6424713	6425213
chr19	6737381	6737881
chr19	7829810	7830310
chr19	8389994	8390494
chr19	8525603	8526103
chr19	8832597	8833097
chr19	10653964	10654464
chr19	11435016	11435516
chr19	12791174	12791674
chr19	12938156	12938656
chr19	13952080	13952580
chr19	14136486	14136986
chr19	15379622	15380122
chr19	15418867	15419367
chr19	16111432	16111932
chr19	17470028	17470528
chr19	17859540	17860040
chr19	18522050	18522550
chr19	19385415	19385915
chr19	19776287	19776787
chr19	35757816	35758316
chr19	35931430	35931930
chr19	36054154	36054654
chr19	36115086	36115586
chr19	38335490	38335990
chr19	39342027	39342527
chr19	39970787	39971287
chr19	42242547	42243047
chr19	45178115	45178615
chr19	45584682	45585182
chr19	45717193	45717693
chr19	45995057	45995557
chr19	46661107	46661607
chr19	48619132	48619632
chr19	49641697	49642197
chr19	54159624	54160124
chr19	54189639	54190139
chr19	54190344	54190844
chr19	56507487	56507987
chr19	58401102	58401602
chr20	34558371	34558871
chr20	35771700	35772200
chr20	41028434	41028934
chr20	62238117	62238617
chr21	28992741	28993241
chr21	33542699	33543199
chr21	33641580	33642080
chr21	36156207	36156707
chr21	43370273	43370773
chr21	45306927	45307427
chr22	17171351	17171851
chr22	19122343	19122843
chr22	20917042	20917542
chr22	21641910	21642410
chr22	36776150	36776650
chr22	37199259	37199759
chr22	38033579	38034079
chr22	38705333	38705833
chr22	41286083	41286583
chr22	42079418	42079918
chr22	42090652	42091152
chr22	49918300	49918800
chrX	3814797	3815297
chrX	16786029	16786529
chr1	1375135	1375635
chr1	5992249	5992749
chr1	7704396	7704896
chr1	7783825	7784325
chr1	7961302	7961802
chr1	11262448	11262948
chr1	11805819	11806319
chr1	24744964	24745464
chr1	27299428	27299928
chr1	30718422	30718922
chr1	42766932	42767432
chr1	43946402	43946902
chr1	44799974	44800474
chr1	54581521	54582021
chr1	59814389	59814889
chr1	94541662	94542162
chr1	116372876	116373376
chr1	147599650	147600150
chr1	149886551	149887051
chr1	150235933	150236433
chr1	154974225	154974725
chr1	155308484	155308984
chr1	156500643	156501143
chr1	156767086	156767586
chr1	160098781	160099281
chr1	167721660	167722160
chr1	171781194	171781694
chr1	192808689	192809189
chr1	205227643	205228143
chr1	223992410	223992910
chr1	230806986	230807486
chr1	235866838	235867338
chr1	236794978	236795478
chr1	244862896	244863396
chr2	8678637	8679137
chr2	20617883	20618383
chr2	24971773	24972273
chr2	36966446	36966946
chr2	55617540	55618040
chr2	65056009	65056509
chr2	73071160	73071660
chr2	73233096	73233596
chr2	74458036	74458536
chr2	74653959	74654459
chr2	88627529	88628029
chr2	96815942	96816442
chr2	97663903	97664403
chr2	130355721	130356221
chr2	135985364	135985864
chr2	152717284	152717784
chr2	190880507	190881007
chr2	207529653	207530153
chr2	207711279	207711779
chr2	231514201	231514701
chr2	231706879	231707379
chr2	231781092	231781592
chr2	233413460	233413960
chr2	238060640	238061140
chr2	238320153	238320653
chr2	241508451	241508951
chr3	4868338	4868838
chr3	8501482	8501982
chr3	9749661	9750161
chr3	23945800	23946300
chr3	40453017	40453517
chr3	42804301	42804801
chr3	45509243	45509743
chr3	48088742	48089242
chr3	48556687	48557187
chr3	50259975	50260475
chr3	50299275	50299775
chr3	53891721	53892221
chr3	66997975	66998475
chr3	75435010	75435510
chr3	93979801	93980301
chr3	98522715	98523215
chr3	100401189	100401689
chr3	108222235	108222735
chr3	115147099	115147599
chr3	115147727	115148227
chr3	121834892	121835392
chr3	129992622	129993122
chr3	150546349	150546849
chr3	155870293	155870793
chr3	156554972	156555472
chr3	156674219	156674719
chr3	157159999	157160499
chr3	160755279	160755779
chr3	167734851	167735351
chr3	179562590	179563090
chr3	184561422	184561922
chr3	194315454	194315954
chr3	197554681	197555181
chr4	473975	474475
chr4	7328951	7329451
chr4	8871891	8872391
chr4	9152479	9152979
chr4	10116612	10117112
chr4	39182100	39182600
chr4	39977432	39977932
chr4	52712056	52712556
chr4	82900393	82900893
chr4	83012768	83013268
chr4	83034832	83035332
chr4	94451623	94452123
chr4	99950118	99950618
chr4	101347411	101347911
chr4	102868701	102869201
chr4	139453525	139454025
chr4	152779649	152780149
chr5	271302	271802
chr5	33440610	33441110
chr5	34929129	34929629
chr5	55994822	55995322
chr5	56909686	56910186
chr5	73448537	73449037
chr5	88660935	88661435
chr5	88684852	88685352
chr5	90529513	90530013
chr5	90558389	90558889
chr5	103258399	103258899
chr5	110719539	110720039
chr5	119070798	119071298
chr5	123423191	123423691
chr5	140174839	140175339
chr5	142770055	142770555
chr5	146203271	146203771
chr5	151252736	151253236
chr5	168579498	168579998
chr5	179698599	179699099
chr6	2765046	2765546
chr6	3118394	3118894
chr6	11537220	11537720
chr6	18155067	18155567
chr6	19836957	19837457
chr6	30717241	30717741
chr6	33391481	33391981
chr6	33417978	33418478
chr6	36594004	36594504
chr6	47309706	47310206
chr6	53359295	53359795
chr6	62286002	62286502
chr6	73520920	73521420
chr6	108559478	108559978
chr6	151390305	151390805
chr6	152982957	152983457
chr7	21427179	21427679
chr7	23531795	23532295
chr7	26200676	26201176
chr7	30504724	30505224
chr7	38177910	38178410
chr7	44082571	44083071
chr7	56051417	56051917
chr7	66654245	66654745
chr7	73522113	73522613
chr7	75914830	75915330
chr7	90211446	90211946
chr7	100148507	100149007
chr7	100673208	100673708
chr7	135211385	135211885
chr7	138002024	138002524
chr7	140696414	140696914
chr7	150378965	150379465
chr7	151519870	151520370
chr7	152463700	152464200
chr8	731040	731540
chr8	26382716	26383216
chr8	29810355	29810855
chr8	38527990	38528490
chr8	61714419	61714919
chr8	78665786	78666286
chr8	85220237	85220737
chr8	89984024	89984524
chr8	100951791	100952291
chr8	101205541	101206041
chr8	123072339	123072839
chr8	140464586	140465086
chr8	144104076	144104576
chr8	144827124	144827624
chr9	2014936	2015436
chr9	20683967	20684467
chr9	27573557	27574057
chr9	34329103	34329603
chr9	35072474	35072974
chr9	37465249	37465749
chr9	86282370	86282870
chr9	96449849	96450349
chr9	101533530	101534030
chr9	113221199	113221699
chr9	113401179	113401679
chr9	122905152	122905652
chr9	127245016	127245516
chr9	128067825	128068325
chr9	128098140	128098640
chr9	134067846	134068346
chr9	136886131	136886631
chr9	137459161	137459661
chr10	1048738	1049238
chr10	12129335	12129835
chr10	91220413	91220913
chr10	91632994	91633494
chr10	95693779	95694279
chr10	97640381	97640881
chr10	99620305	99620805
chr10	102502022	102502522
chr10	102641993	102642493
chr10	130110596	130111096
chr11	10857895	10858395
chr11	13277361	13277861
chr11	17276386	17276886
chr11	18394225	18394725
chr11	19712516	19713016
chr11	31817767	31818267
chr11	64305138	64305638
chr11	64878502	64879002
chr11	64917124	64917624
chr11	65422009	65422509
chr11	66677712	66678212
chr11	66958274	66958774
chr11	74170910	74171410
chr11	75814838	75815338
chr11	77066664	77067164
chr11	83071729	83072229
chr11	111601986	111602486
chr11	111926945	111927445
chr11	130069511	130070011
chr12	6470522	6471022
chr12	6753430	6753930
chr12	12562510	12563010
chr12	26833072	26833572
chr12	52051070	52051570
chr12	53500656	53501156
chr12	53625865	53626365
chr12	53727343	53727843
chr12	57078608	57079108
chr12	67269078	67269578
chr12	71663687	71664187
chr12	103100288	103100788
chr12	109713422	109713922
chr12	124838128	124838628
chr12	132908291	132908791
chr12	133130118	133130618
chr13	24038933	24039433
chr13	24922707	24923207
chr13	26557319	26557819
chr13	28718791	28719291
chr13	49792831	49793331
chr13	49936191	49936691
chr13	95676754	95677254
chr13	97976166	97976666
chr13	110712925	110713425
chr14	20461483	20461983
chr14	23320918	23321418
chr14	24114461	24114961
chr14	24141380	24141880
chr14	24242435	24242935
chr14	39432211	39432711
chr14	44961857	44962357
chr14	45134306	45134806
chr14	50312027	50312527
chr14	70809514	70810014
chr14	75294022	75294522
chr14	81533780	81534280
chr14	95157338	95157838
chr14	103333871	103334371
chr15	31326316	31326816
chr15	44195083	44195583
chr15	44426901	44427401
chr15	72474040	72474540
chr15	89334694	89335194
chr15	92882249	92882749
chr16	970823	971323
chr16	1964676	1965176
chr16	5097942	5098442
chr16	11640297	11640797
chr16	18801460	18801960
chr16	21502056	21502556
chr16	27549809	27550309
chr16	30370503	30371003
chr16	48393753	48394253
chr16	53703720	53704220
chr16	66880220	66880720
chr16	67480985	67481485
chr16	77190579	77191079
chr16	84504484	84504984
chr16	87392005	87392505
chr16	88452518	88453018
chr16	88662944	88663444
chr17	4710259	4710759
chr17	7931829	7932329
chr17	15999497	15999997
chr17	17972280	17972780
chr17	28041372	28041872
chr17	28952232	28952732
chr17	42676924	42677424
chr17	45148099	45148599
chr17	48892319	48892819
chr17	49788962	49789462
chr17	50866250	50866750
chr17	59155256	59155756
chr17	60599872	60600372
chr17	68457488	68457988
chr17	72120678	72121178
chr17	75456310	75456810
chr17	75693602	75694102
chr17	75855277	75855777
chr17	76671569	76672069
chr17	81094820	81095320
chr17	81238878	81239378
chr17	81683627	81684127
chr17	83051614	83052114
chr18	9913645	9914145
chr18	12377219	12377719
chr18	21740420	21740920
chr18	32092274	32092774
chr18	35240742	35241242
chr18	37764792	37765292
chr18	50559792	50560292
chr19	1103709	1104209
chr19	2096392	2096892
chr19	3572514	3573014
chr19	4471715	4472215
chr19	9819005	9819505
chr19	9834936	9835436
chr19	10870904	10871404
chr19	14518375	14518875
chr19	18919303	18919803
chr19	32971864	32972364
chr19	38374417	38374917
chr19	38899554	38900054
chr19	39390966	39391466
chr19	40777931	40778431
chr19	42396821	42397321
chr19	47256971	47257471
chr19	48363920	48364420
chr19	49487157	49487657
chr19	49495994	49496494
chr19	49877357	49877857
chr19	50328998	50329498
chr19	56121227	56121727
chr20	3767663	3768163
chr20	5126645	5127145
chr20	18507587	18508087
chr20	33993009	33993509
chr20	50510031	50510531
chr21	33479757	33480257
chr21	33642094	33642594
chr22	21735751	21736251
chr22	30968904	30969404
chr22	37844157	37844657
chr22	38181648	38182148
chr22	38700787	38701287
chr22	41381545	41382045
chr22	41589780	41590280
chr22	41620902	41621402
chr22	50582708	50583208
chrX	15854664	15855164
chrX	16719285	16719785
chrX	20141725	20142225
chr1	1231830	1232330
chr1	1615144	1615644
chr1	2050051	2050551
chr1	10032535	10033035
chr1	10398689	10399189
chr1	12019124	12019624
chr1	15524808	15525308
chr1	16613358	16613858
chr1	25430552	25431052
chr1	26921397	26921897
chr1	31644687	31645187
chr1	32650842	32651342
chr1	35192985	35193485
chr1	38859586	38860086
chr1	42682060	42682560
chr1	42924158	42924658
chr1	43649772	43650272
chr1	45303422	45303922
chr1	46132803	46133303
chr1	52366155	52366655
chr1	96206429	96206929
chr1	113390072	113390572
chr1	113904919	113905419
chr1	150282154	150282654
chr1	153633699	153634199
chr1	153727646	153728146
chr1	153958428	153958928
chr1	156338133	156338633
chr1	174999433	174999933
chr1	179882337	179882837
chr1	203290413	203290913
chr1	203305160	203305660
chr1	212608437	212608937
chr1	225924104	225924604
chr1	226062402	226062902
chr1	230978712	230979212
chr1	232629988	232630488
chr1	236281843	236282343
chr1	241640164	241640664
chr1	244970536	244971036
chr2	10448171	10448671
chr2	14632369	14632869
chr2	20051491	20051991
chr2	26785630	26786130
chr2	27370139	27370639
chr2	28392551	28393051
chr2	43226435	43226935
chr2	44937257	44937757
chr2	44949753	44950253
chr2	46460161	46460661
chr2	48314095	48314595
chr2	64144261	64144761
chr2	85595395	85595895
chr2	111898299	111898799
chr2	127387897	127388397
chr2	130342503	130343003
chr2	135531142	135531642
chr2	158968349	158968849
chr2	175168150	175168650
chr2	190319651	190320151
chr2	209423720	209424220
chr2	217756356	217756856
chr2	218568178	218568678
chr2	219229444	219229944
chr2	219279061	219279561
chr2	219388190	219388690
chr2	232447815	232448315
chr2	232502902	232503402
chr2	240820092	240820592
chr2	241811091	241811591
chr3	9933490	9933990
chr3	25664741	25665241
chr3	37860300	37860800
chr3	38164861	38165361
chr3	41961947	41962447
chr3	49786395	49786895
chr3	52057168	52057668
chr3	57597337	57597837
chr3	88058800	88059300
chr3	111674358	111674858
chr3	113696574	113697074
chr3	119034621	119035121
chr3	136752289	136752789
chr3	155854396	155854896
chr3	160565395	160565895
chr3	183099389	183099889
chr3	185937854	185938354
chr4	3292540	3293040
chr4	8158722	8159222
chr4	10018796	10019296
chr4	17810566	17811066
chr4	87006941	87007441
chr4	87117640	87118140
chr4	107989512	107990012
chr4	119212367	119212867
chr4	122732321	122732821
chr4	139177774	139178274
chr4	159102752	159103252
chr4	173370535	173371035
chr4	179996360	179996860
chr4	183504375	183504875
chr4	184649303	184649803
chr4	185142960	185143460
chr5	34007807	34008307
chr5	36662240	36662740
chr5	43313337	43313837
chr5	87412703	87413203
chr5	129094368	129094868
chr5	134370856	134371356
chr5	150758435	150758935
chr5	172437553	172438053
chr5	173056955	173057455
chr5	176537750	176538250
chr5	179732466	179732966
chr6	3227499	3227999
chr6	3247616	3248116
chr6	5003476	5003976
chr6	11232432	11232932
chr6	16128750	16129250
chr6	30213249	30213749
chr6	30617154	30617654
chr6	31271906	31272406
chr6	31815198	31815698
chr6	31958816	31959316
chr6	32971703	32972203
chr6	35259257	35259757
chr6	36998492	36998992
chr6	37819178	37819678
chr6	53348784	53349284
chr6	70413172	70413672
chr6	98834154	98834654
chr6	108558308	108558808
chr6	110874434	110874934
chr6	116571052	116571552
chr6	139134776	139135276
chr6	145964186	145964686
chr6	146543412	146543912
chr6	164378233	164378733
chr6	165988009	165988509
chr7	149096	149596
chr7	816320	816820
chr7	993107	993607
chr7	1044225	1044725
chr7	2631513	2632013
chr7	5530422	5530922
chr7	24980027	24980527
chr7	25125203	25125703
chr7	32495170	32495670
chr7	39949356	39949856
chr7	44999752	45000252
chr7	66681841	66682341
chr7	73557017	73557517
chr7	73738722	73739222
chr7	77536690	77537190
chr7	101244575	101245075
chr7	123534557	123535057
chr8	13133154	13133654
chr8	23528579	23529079
chr8	28401811	28402311
chr8	30727676	30728176
chr8	37762295	37762795
chr8	42152604	42153104
chr8	42843125	42843625
chr8	48514364	48514864
chr8	51898975	51899475
chr8	56211444	56211944
chr8	60516629	60517129
chr8	63168293	63168793
chr8	66432180	66432680
chr8	73878691	73879191
chr8	118111648	118112148
chr8	125430016	125430516
chr8	134832174	134832674
chr8	143368487	143368987
chr8	144901348	144901848
chr9	15146333	15146833
chr9	27353499	27353999
chr9	35814853	35815353
chr9	83980423	83980923
chr9	99821562	99822062
chr9	121577149	121577649
chr9	125241198	125241698
chr9	127771213	127771713
chr9	129080731	129081231
chr9	129178077	129178577
chr9	129835108	129835608
chr9	132240964	132241464
chr9	137200612	137201112
chr10	13161213	13161713
chr10	44959417	44959917
chr10	70170385	70170885
chr10	84139166	84139666
chr10	102245159	102245659
chr10	124916559	124917059
chr11	535414	535914
chr11	14892037	14892537
chr11	16738288	16738788
chr11	47767205	47767705
chr11	57667537	57668037
chr11	64269828	64270328
chr11	67508029	67508529
chr11	71786824	71787324
chr11	72793550	72794050
chr11	73779329	73779829
chr11	77994660	77995160
chr11	82900251	82900751
chr11	86068965	86069465
chr11	94493672	94494172
chr11	118436093	118436593
chr11	133956786	133957286
chr12	6532494	6532994
chr12	6764116	6764616
chr12	22624846	22625346
chr12	31728915	31729415
chr12	46383251	46383751
chr12	48682093	48682593
chr12	51424529	51425029
chr12	53451727	53452227
chr12	54280345	54280845
chr12	56645871	56646371
chr12	82358554	82359054
chr12	96035490	96035990
chr12	107093633	107094133
chr12	120686214	120686714
chr12	123232981	123233481
chr12	123269265	123269765
chr13	30465751	30466251
chr13	67230193	67230693
chr13	114281613	114282113
chr14	21455930	21456430
chr14	39174840	39175340
chr14	52950883	52951383
chr14	54396568	54397068
chr14	60514713	60515213
chr14	63543206	63543706
chr14	68793190	68793690
chr14	72812453	72812953
chr14	73886478	73886978
chr14	75278226	75278726
chr14	77097903	77098403
chr14	92793846	92794346
chr14	100238473	100238973
chr14	102524500	102525000
chr14	103385065	103385565
chr14	104736240	104736740
chr15	40564875	40565375
chr15	58749784	58750284
chr15	70062506	70063006
chr15	75453865	75454365
chr15	75738476	75738976
chr15	99123589	99124089
chr15	99251074	99251574
chr16	2214689	2215189
chr16	2223219	2223719
chr16	4253710	4254210
chr16	11497338	11497838
chr16	20900236	20900736
chr16	75245443	75245943
chr16	87492850	87493350
chr17	3004059	3004559
chr17	3636133	3636633
chr17	8435626	8436126
chr17	17591583	17592083
chr17	18039055	18039555
chr17	29293983	29294483
chr17	37359026	37359526
chr17	39231147	39231647
chr17	44186548	44187048
chr17	56833733	56834233
chr17	59331377	59331877
chr17	63773494	63773994
chr17	63842775	63843275
chr17	75779658	75780158
chr18	12947665	12948165
chr18	47594141	47594641
chr18	59273250	59273750
chr18	59359116	59359616
chr19	680329	680829
chr19	1260705	1261205
chr19	2900522	2901022
chr19	4065769	4066269
chr19	5680422	5680922
chr19	7943615	7944115
chr19	8412968	8413468
chr19	10380436	10380936
chr19	11597124	11597624
chr19	12551342	12551842
chr19	13151593	13152093
chr19	16496054	16496554
chr19	20052041	20052541
chr19	32675005	32675505
chr19	34359267	34359767
chr19	35740429	35740929
chr19	35748199	35748699
chr19	36014093	36014593
chr19	40443011	40443511
chr19	41263749	41264249
chr19	43668591	43669091
chr19	44845793	44846293
chr19	45863021	45863521
chr19	48714176	48714676
chr19	50203272	50203772
chr19	50724802	50725302
chr19	55166464	55166964
chr19	58380862	58381362
chr20	3889012	3889512
chr20	5610842	5611342
chr20	23358025	23358525
chr20	32357920	32358420
chr20	33810979	33811479
chr20	49277950	49278450
chr21	37366406	37366906
chr21	45643153	45643653
chr21	46323754	46324254
chr22	19479556	19480056
chr22	30445975	30446475
chr22	33920896	33921396
chr22	40951399	40951899
chrX	15675170	15675670
chrX	41084504	41085004
chr1	1000590	1001090
chr1	2391420	2391920
chr1	3624633	3625133
chr1	3900562	3901062
chr1	16206435	16206935
chr1	23959462	23959962
chr1	27054313	27054813
chr1	27392311	27392811
chr1	31938219	31938719
chr1	36149378	36149878
chr1	36224098	36224598
chr1	40862190	40862690
chr1	67684884	67685384
chr1	94926958	94927458
chr1	108746381	108746881
chr1	150876588	150877088
chr1	153922832	153923332
chr1	154558663	154559163
chr1	156421584	156422084
chr1	161202052	161202552
chr1	161389704	161390204
chr1	162561198	162561698
chr1	166947484	166947984
chr1	167935952	167936452
chr1	169893729	169894229
chr1	182604211	182604711
chr1	183881713	183882213
chr1	201028157	201028657
chr1	202810664	202811164
chr1	204411648	204412148
chr1	210393624	210394124
chr1	225777516	225778016
chr1	228109128	228109628
chr1	231192581	231193081
chr2	2769539	2770039
chr2	12169600	12170100
chr2	43636959	43637459
chr2	44929105	44929605
chr2	46296980	46297480
chr2	48440463	48440963
chr2	64524007	64524507
chr2	74833771	74834271
chr2	85602484	85602984
chr2	88691328	88691828
chr2	121736863	121737363
chr2	152718302	152718802
chr2	159286500	159287000
chr2	162343787	162344287
chr2	172555740	172556240
chr2	178480083	178480583
chr2	189784163	189784663
chr2	218406163	218406663
chr2	241315517	241316017
chr3	4978310	4978810
chr3	4979047	4979547
chr3	5187327	5187827
chr3	7978070	7978570
chr3	9396528	9397028
chr3	14178445	14178945
chr3	20186051	20186551
chr3	27484247	27484747
chr3	32106228	32106728
chr3	48188290	48188790
chr3	48439936	48440436
chr3	49723831	49724331
chr3	50359382	50359882
chr3	52536250	52536750
chr3	121749558	121750058
chr3	123584911	123585411
chr3	125595353	125595853
chr3	125916310	125916810
chr3	136861869	136862369
chr3	137962002	137962502
chr3	150762963	150763463
chr3	184174449	184174949
chr3	194134622	194135122
chr4	1289554	1290054
chr4	2801000	2801500
chr4	2843556	2844056
chr4	7067973	7068473
chr4	42656910	42657410
chr4	74157767	74158267
chr4	75724296	75724796
chr4	82429253	82429753
chr4	112231444	112231944
chr4	121870351	121870851
chr4	128060983	128061483
chr4	128287665	128288165
chr4	145180412	145180912
chr4	176319606	176320106
chr5	56815233	56815733
chr5	68215449	68215949
chr5	69093680	69094180
chr5	90409549	90410049
chr5	91380800	91381300
chr5	98928764	98929264
chr5	98929358	98929858
chr5	109689128	109689628
chr5	138331767	138332267
chr5	138463927	138464427
chr5	138575538	138576038
chr5	141636672	141637172
chr5	149551278	149551778
chr5	151028622	151029122
chr5	154858250	154858750
chr5	163437282	163437782
chr5	171387480	171387980
chr5	179818862	179819362
chr5	180810320	180810820
chr6	18527798	18528298
chr6	20212310	20212810
chr6	32196321	32196821
chr6	33410113	33410613
chr6	36680142	36680642
chr6	43770002	43770502
chr6	46652647	46653147
chr6	79537228	79537728
chr6	89081503	89082003
chr6	109094651	109095151
chr6	166999016	166999516
chr7	1160053	1160553
chr7	2844220	2844720
chr7	16645531	16646031
chr7	27739845	27740345
chr7	35037327	35037827
chr7	64307130	64307630
chr7	66075518	66076018
chr7	66844712	66845212
chr7	75611711	75612211
chr7	76294603	76295103
chr7	87059530	87060030
chr7	90403670	90404170
chr7	92134271	92134771
chr7	99504356	99504856
chr7	102080250	102080750
chr7	107890871	107891371
chr7	112939783	112940283
chr7	133081959	133082459
chr7	138459982	138460482
chr7	139359553	139360053
chr7	149720394	149720894
chr7	158704633	158705133
chr8	26577574	26578074
chr8	31033404	31033904
chr8	60652064	60652564
chr8	73294315	73294815
chr8	91070024	91070524
chr8	117520405	117520905
chr8	133571821	133572321
chr8	141128217	141128717
chr8	144326686	144327186
chr9	33076496	33076996
chr9	34048986	34049486
chr9	34178744	34179244
chr9	34458397	34458897
chr9	35732272	35732772
chr9	36190587	36191087
chr9	86766914	86767414
chr9	93095844	93096344
chr9	113275351	113275851
chr9	120842775	120843275
chr9	127611918	127612418
chr9	129642050	129642550
chr9	130913228	130913728
chr9	134024992	134025492
chr9	136849069	136849569
chr9	137590331	137590831
chr10	13299853	13300353
chr10	15168419	15168919
chr10	16817326	16817826
chr10	17228983	17229483
chr10	22003517	22004017
chr10	24724483	24724983
chr10	35126531	35127031
chr10	35642139	35642639
chr10	70146479	70146979
chr10	70403812	70404312
chr10	70432097	70432597
chr10	71851081	71851581
chr10	73096773	73097273
chr10	78303171	78303671
chr10	86521620	86522120
chr10	102503627	102504127
chr10	102714117	102714617
chr10	103918020	103918520
chr10	119596949	119597449
chr10	123154055	123154555
chr11	12674061	12674561
chr11	18321980	18322480
chr11	31810936	31811436
chr11	43680353	43680853
chr11	61815120	61815620
chr11	65354427	65354927
chr11	65487463	65487963
chr11	65606969	65607469
chr11	65919059	65919559
chr11	69157317	69157817
chr11	72080484	72080984
chr11	72112163	72112663
chr11	73597986	73598486
chr11	77474118	77474618
chr11	95790190	95790690
chr11	117098302	117098802
chr11	119375592	119376092
chr11	125592381	125592881
chr11	126082267	126082767
chr12	6663038	6663538
chr12	8026466	8026966
chr12	8242898	8243398
chr12	8949777	8950277
chr12	15882099	15882599
chr12	25386043	25386543
chr12	26114145	26114645
chr12	39443115	39443615
chr12	45728665	45729165
chr12	49322835	49323335
chr12	49741178	49741678
chr12	52192084	52192584
chr12	53054266	53054766
chr12	55829436	55829936
chr12	56127873	56128373
chr12	56360074	56360574
chr12	57693740	57694240
chr12	57846829	57847329
chr12	88141956	88142456
chr12	106774306	106774806
chr12	109573444	109573944
chr12	121399744	121400244
chr12	123383800	123384300
chr12	128823791	128824291
chr13	21639557	21640057
chr13	27171769	27172269
chr13	31161850	31162350
chr13	51583940	51584440
chr14	21476842	21477342
chr14	24147106	24147606
chr14	31457172	31457672
chr14	58297994	58298494
chr14	60091678	60092178
chr14	60508869	60509369
chr14	61695087	61695587
chr14	61762104	61762604
chr14	66507783	66508283
chr14	77028513	77029013
chr14	77985295	77985795
chr14	90828007	90828507
chr14	94026053	94026553
chr14	95534676	95535176
chr14	101964164	101964664
chr14	104985490	104985990
chr15	22838304	22838804
chr15	45279054	45279554
chr15	48810964	48811464
chr15	64841148	64841648
chr15	66386565	66387065
chr15	72230177	72230677
chr15	73633170	73633670
chr15	76931417	76931917
chr15	80059328	80059828
chr15	90994444	90994944
chr15	92809059	92809559
chr15	98852218	98852718
chr16	1611926	1612426
chr16	2531819	2532319
chr16	3003763	3004263
chr16	3400879	3401379
chr16	4616168	4616668
chr16	4847139	4847639
chr16	13919791	13920291
chr16	22297064	22297564
chr16	24539263	24539763
chr16	30748030	30748530
chr16	31459189	31459689
chr16	53130447	53130947
chr16	58629695	58630195
chr16	67183446	67183946
chr16	72008395	72008895
chr16	75464553	75465053
chr16	87848099	87848599
chr16	87945332	87945832
chr16	87950804	87951304
chr16	90077235	90077735
chr17	1516507	1517007
chr17	1684700	1685200
chr17	2399517	2400017
chr17	4731470	4731970
chr17	7403950	7404450
chr17	7857341	7857841
chr17	8138789	8139289
chr17	8152312	8152812
chr17	11997273	11997773
chr17	17836116	17836616
chr17	45161527	45162027
chr17	45316910	45317410
chr17	74872977	74873477
chr17	75289248	75289748
chr17	75784839	75785339
chr17	76264839	76265339
chr18	582112	582612
chr18	12991014	12991514
chr18	56638460	56638960
chr18	59265427	59265927
chr19	506905	507405
chr19	995370	995870
chr19	1205398	1205898
chr19	2475791	2476291
chr19	2950596	2951096
chr19	2977127	2977627
chr19	4342556	4343056
chr19	10568875	10569375
chr19	10717696	10718196
chr19	12890741	12891241
chr19	13795026	13795526
chr19	14006138	14006638
chr19	18152796	18153296
chr19	38930577	38931077
chr19	40465674	40466174
chr19	45770496	45770996
chr19	48993190	48993690
chr19	49453266	49453766
chr19	55461524	55462024
chr20	2130011	2130511
chr20	21125627	21126127
chr20	41618266	41618766
chr20	46406429	46406929
chr21	43323080	43323580
chr21	43362298	43362798
chr21	45336871	45337371
chr22	24555013	24555513
chr22	31107473	31107973
chr22	35299903	35300403
chr22	38755800	38756300
chr22	40044360	40044860
chr22	41091363	41091863
chr22	41417938	41418438
chr22	42614711	42615211
chr22	43014992	43015492
chr22	47247030	47247530
chrX	13652844	13653344
chrX	53422500	53423000
chr1	2586266	2586766
chr1	8026112	8026612
chr1	8817479	8817979
chr1	9233232	9233732
chr1	9428781	9429281
chr1	26233809	26234309
chr1	26864942	26865442
chr1	27489997	27490497
chr1	27568342	27568842
chr1	30824356	30824856
chr1	31715058	31715558
chr1	33080807	33081307
chr1	36385833	36386333
chr1	45491001	45491501
chr1	47314043	47314543
chr1	64966278	64966778
chr1	86914285	86914785
chr1	94418064	94418564
chr1	95072429	95072929
chr1	109253357	109253857
chr1	109667736	109668236
chr1	145957807	145958307
chr1	154970555	154971055
chr1	167220444	167220944
chr1	180182563	180183063
chr1	182279846	182280346
chr1	201888373	201888873
chr1	205631786	205632286
chr1	206202936	206203436
chr1	207751750	207752250
chr1	228082357	228082857
chr1	235328095	235328595
chr1	241519556	241520056
chr1	243255674	243256174
chr2	12176954	12177454
chr2	21333166	21333666
chr2	26033701	26034201
chr2	27489631	27490131
chr2	38602798	38603298
chr2	38751177	38751677
chr2	42133101	42133601
chr2	47014582	47015082
chr2	47906430	47906930
chr2	55519312	55519812
chr2	61764133	61764633
chr2	74529630	74530130
chr2	97995714	97996214
chr2	99141028	99141528
chr2	105592260	105592760
chr2	109613986	109614486
chr2	120252473	120252973
chr2	130797861	130798361
chr2	157876152	157876652
chr2	186485914	186486414
chr2	191013990	191014490
chr2	219206493	219206993
chr2	224585321	224585821
chr2	226791494	226791994
chr2	235807423	235807923
chr2	237966589	237967089
chr2	238288624	238289124
chr2	241355883	241356383
chr3	9249434	9249934
chr3	12810142	12810642
chr3	16264853	16265353
chr3	39152655	39153155
chr3	40309362	40309862
chr3	49469918	49470418
chr3	50337270	50337770
chr3	52278476	52278976
chr3	58491639	58492139
chr3	72446976	72447476
chr3	101573826	101574326
chr3	101724652	101725152
chr3	120742353	120742853
chr3	122383882	122384382
chr3	128680537	128681037
chr3	129183708	129184208
chr3	139389505	139390005
chr3	141737961	141738461
chr3	143971489	143971989
chr3	172750419	172750919
chr3	194135785	194136285
chr4	7042940	7043440
chr4	7299020	7299520
chr4	15002034	15002534
chr4	18021892	18022392
chr4	26860436	26860936
chr4	48269657	48270157
chr4	75673241	75673741
chr4	76213631	76214131
chr4	185209279	185209779
chr5	62403695	62404195
chr5	75511501	75512001
chr5	96702448	96702948
chr5	132294046	132294546
chr5	137296238	137296738
chr5	138338019	138338519
chr5	151020252	151020752
chr5	172860719	172861219
chr6	15504891	15505391
chr6	24721076	24721576
chr6	32128093	32128593
chr6	33454249	33454749
chr6	35342248	35342748
chr6	37257446	37257946
chr6	43059282	43059782
chr6	81752548	81753048
chr6	143843009	143843509
chr6	149454469	149454969
chr6	159762129	159762629
chr6	166382880	166383380
chr7	6008949	6009449
chr7	33062597	33063097
chr7	43869356	43869856
chr7	54832883	54833383
chr7	55526762	55527262
chr7	67302319	67302819
chr7	75994440	75994940
chr7	87152142	87152642
chr7	94657810	94658310
chr7	100101242	100101742
chr7	112450639	112451139
chr7	116526002	116526502
chr7	132398453	132398953
chr7	143836452	143836952
chr7	149838063	149838563
chr7	150383814	150384314
chr7	151028125	151028625
chr8	9555569	9556069
chr8	17496806	17497306
chr8	27611416	27611916
chr8	66613179	66613679
chr8	73008543	73009043
chr8	103414923	103415423
chr8	123516919	123517419
chr8	143246589	143247089
chr8	144462707	144463207
chr9	5628755	5629255
chr9	14322341	14322841
chr9	20622336	20622836
chr9	33024924	33025424
chr9	36258247	36258747
chr9	36487633	36488133
chr9	74497029	74497529
chr9	83921299	83921799
chr9	89318539	89319039
chr9	124011361	124011861
chr9	126914498	126914998
chr9	127735114	127735614
chr9	129036237	129036737
chr9	129488470	129488970
chr9	130712506	130713006
chr9	131373309	131373809
chr9	134361307	134361807
chr9	136977167	136977667
chr10	624878	625378
chr10	12068604	12069104
chr10	17201183	17201683
chr10	31760037	31760537
chr10	37857458	37857958
chr10	70233232	70233732
chr10	73811672	73812172
chr10	99620809	99621309
chr10	99659099	99659599
chr10	102502633	102503133
chr10	102743521	102744021
chr10	103396364	103396864
chr11	1559319	1559819
chr11	3378965	3379465
chr11	6619247	6619747
chr11	18634245	18634745
chr11	19116856	19117356
chr11	28108039	28108539
chr11	34357836	34358336
chr11	34916337	34916837
chr11	45917764	45918264
chr11	57712171	57712671
chr11	59668959	59669459
chr11	61967445	61967945
chr11	62123609	62124109
chr11	65111558	65112058
chr11	66288992	66289492
chr11	66312695	66313195
chr11	68121251	68121751
chr11	68460136	68460636
chr11	73761106	73761606
chr11	77127950	77128450
chr11	113147230	113147730
chr11	118689995	118690495
chr11	119057073	119057573
chr11	134253220	134253720
chr12	2812367	2812867
chr12	6533577	6534077
chr12	30754691	30755191
chr12	32679009	32679509
chr12	45990484	45990984
chr12	48198005	48198505
chr12	49131212	49131712
chr12	49707379	49707879
chr12	52203167	52203667
chr12	53005994	53006494
chr12	56104192	56104692
chr12	56158054	56158554
chr12	76031379	76031879
chr12	76084525	76085025
chr12	76878829	76879329
chr12	93377521	93378021
chr12	96233999	96234499
chr12	100266871	100267371
chr12	120686788	120687288
chr13	25301309	25301809
chr13	42271591	42272091
chr13	51803545	51804045
chr13	52011990	52012490
chr13	52652488	52652988
chr13	110706025	110706525
chr13	113490585	113491085
chr14	21103800	21104300
chr14	24135822	24136322
chr14	26598229	26598729
chr14	32076608	32077108
chr14	35045987	35046487
chr14	35385493	35385993
chr14	52695412	52695912
chr14	52729740	52730240
chr14	54509617	54510117
chr14	60248847	60249347
chr14	65412324	65412824
chr14	67241045	67241545
chr14	68539399	68539899
chr14	71320074	71320574
chr14	74203454	74203954
chr14	81220807	81221307
chr14	90396709	90397209
chr14	90454284	90454784
chr14	93036763	93037263
chr14	93115097	93115597
chr14	101760397	101760897
chr15	41283669	41284169
chr15	43510634	43511134
chr15	64163023	64163523
chr16	1943117	1943617
chr16	29815817	29816317
chr16	30065357	30065857
chr16	30355104	30355604
chr16	30923093	30923593
chr16	46831296	46831796
chr16	72093495	72093995
chr16	74666742	74667242
chr16	81006982	81007482
chr16	84116655	84117155
chr17	1456093	1456593
chr17	1628717	1629217
chr17	2392538	2393038
chr17	3048750	3049250
chr17	39209714	39210214
chr17	39980317	39980817
chr17	40099076	40099576
chr17	40417786	40418286
chr17	42154839	42155339
chr17	42609265	42609765
chr17	43483558	43484058
chr17	64145629	64146129
chr17	68247708	68248208
chr17	74748300	74748800
chr17	81346109	81346609
chr17	82292640	82293140
chr18	7566996	7567496
chr18	13726378	13726878
chr18	63367403	63367903
chr19	1249451	1249951
chr19	1507657	1508157
chr19	2061431	2061931
chr19	2841039	2841539
chr19	4723709	4724209
chr19	5977988	5978488
chr19	6110306	6110806
chr19	12333517	12334017
chr19	13152788	13153288
chr19	13747524	13748024
chr19	14545352	14545852
chr19	17303223	17303723
chr19	17337223	17337723
chr19	32405381	32405881
chr19	35628693	35629193
chr19	38402791	38403291
chr19	40348283	40348783
chr19	44741792	44742292
chr19	45792695	45793195
chr19	46600726	46601226
chr19	48624004	48624504
chr19	49118972	49119472
chr19	49869318	49869818
chr19	50025253	50025753
chr19	50511086	50511586
chr19	55407928	55408428
chr19	55599422	55599922
chr19	58098084	58098584
chr20	688883	689383
chr20	31604946	31605446
chr20	33489659	33490159
chr20	44885347	44885847
chr20	45972222	45972722
chr20	50731003	50731503
chr20	59032189	59032689
chr21	29073517	29074017
chr21	31659389	31659889
chr21	42093974	42094474
chr22	17628582	17629082
chr22	20020756	20021256
chr22	20858620	20859120
chr22	38201662	38202162
chr22	41832753	41833253
chr22	42553593	42554093
chrX	15737913	15738413
[truncated: 181,053 more rows]

## Sheet: Microglia peakSet
The genomic coordinates of the peaks in Microglia class
Chromosome	Start	End
chr1	6784895	6785395
chr1	27725621	27726121
chr1	58783989	58784489
chr1	85276404	85276904
chr1	151281890	151282390
chr1	221741976	221742476
chr1	228139781	228140281
chr2	30146408	30146908
chr2	48314073	48314573
chr2	64750876	64751376
chr2	69914418	69914918
chr2	74457988	74458488
chr2	128027175	128027675
chr2	177212330	177212830
chr2	197453182	197453682
chr2	197499738	197500238
chr2	207165994	207166494
chr2	231464330	231464830
chr2	231708155	231708655
chr3	5187353	5187853
chr3	50235712	50236212
chr3	131381446	131381946
chr3	186109014	186109514
chr3	195442965	195443465
chr4	1346863	1347363
chr4	2261996	2262496
chr4	2536134	2536634
chr4	6269476	6269976
chr4	82900392	82900892
chr4	148442388	148442888
chr4	173334289	173334789
chr5	41903917	41904417
chr5	75336819	75337319
chr5	108748625	108749125
chr5	140401492	140401992
chr5	173887926	173888426
chr6	20401471	20401971
chr6	63572215	63572715
chr6	166627087	166627587
chr7	44606626	44607126
chr7	75738977	75739477
chr7	100538793	100539293
chr7	100586170	100586670
chr7	150378969	150379469
chr8	25458306	25458806
chr8	70401926	70402426
chr8	101205614	101206114
chr9	34329176	34329676
chr10	931574	932074
chr10	72273584	72274084
chr10	74826186	74826686
chr11	3797461	3797961
chr11	64185799	64186299
chr11	72080542	72081042
chr11	83156646	83157146
chr11	121575179	121575679
chr11	125111549	125112049
chr12	53079232	53079732
chr12	57078625	57079125
chr13	97432940	97433440
chr13	110715400	110715900
chr14	23285981	23286481
chr14	23320933	23321433
chr14	52552434	52552934
chr14	90383064	90383564
chr14	91060628	91061128
chr14	100192827	100193327
chr16	30370553	30371053
chr16	53503228	53503728
chr17	1716216	1716716
chr17	7572411	7572911
chr17	17972322	17972822
chr17	42388308	42388808
chr17	47895832	47896332
chr17	48047937	48048437
chr17	58517759	58518259
chr17	63621891	63622391
chr17	81860472	81860972
chr19	4968720	4969220
chr19	5904315	5904815
chr19	13952078	13952578
chr19	14117641	14118141
chr19	16111457	16111957
chr19	18203895	18204395
chr19	18522015	18522515
chr19	38850234	38850734
chr19	38899595	38900095
chr19	42268713	42269213
chr19	45178140	45178640
chr19	46661135	46661635
chr19	48468941	48469441
chr19	49641693	49642193
chr19	49766381	49766881
chr19	54137202	54137702
chr19	54159610	54160110
chr19	55339384	55339884
chr19	58401105	58401605
chr20	34876027	34876527
chr21	42496164	42496664
chr22	21735740	21736240
chr1	1375115	1375615
chr1	2227610	2228110
chr1	9910293	9910793
chr1	16904666	16905166
chr1	30756633	30757133
chr1	43649775	43650275
chr1	44674283	44674783
chr1	110339034	110339534
chr1	154974190	154974690
chr1	172532597	172533097
chr1	181088390	181088890
chr1	185156883	185157383
chr1	211579050	211579550
chr1	226939908	226940408
chr1	228165802	228166302
chr1	248838015	248838515
chr2	20446724	20447224
chr2	44168312	44168812
chr2	61538166	61538666
chr2	62705341	62705841
chr2	65056026	65056526
chr2	88627490	88627990
chr2	152717292	152717792
chr2	175168159	175168659
chr2	239401056	239401556
chr3	14948248	14948748
chr3	33440347	33440847
chr3	49723822	49724322
chr3	98901554	98902054
chr3	115147091	115147591
chr3	120094780	120095280
chr3	121749557	121750057
chr3	156554983	156555483
chr3	160565379	160565879
chr3	184561423	184561923
chr3	185937868	185938368
chr3	186570246	186570746
chr4	781720	782220
chr4	26860411	26860911
chr4	165327285	165327785
chr5	43121238	43121738
chr5	61331896	61332396
chr5	132866300	132866800
chr5	138464840	138465340
chr5	138543131	138543631
chr5	149960440	149960940
chr5	168579518	168580018
chr5	172770964	172771464
chr5	177426161	177426661
chr5	179732454	179732954
chr6	31827384	31827884
chr6	32195654	32196154
chr6	32952982	32953482
chr6	43013761	43014261
chr6	43170887	43171387
chr6	73521004	73521504
chr6	152982950	152983450
chr7	23013922	23014422
chr7	44986450	44986950
chr7	66628618	66629118
chr7	76317936	76318436
chr7	107168431	107168931
chr7	108526051	108526551
chr7	108569544	108570044
chr7	120950411	120950911
chr7	129224578	129225078
chr7	138001997	138002497
chr7	149028562	149029062
chr7	151519851	151520351
chr8	38996384	38996884
chr8	73972017	73972517
chr8	89983969	89984469
chr9	4792533	4793033
chr9	27573237	27573737
chr9	34989340	34989840
chr9	35732243	35732743
chr9	72365145	72365645
chr9	79571504	79572004
chr9	89310667	89311167
chr9	92764731	92765231
chr9	94165837	94166337
chr9	99821528	99822028
chr9	101398438	101398938
chr9	125241128	125241628
chr9	127396709	127397209
chr9	129178067	129178567
chr9	136886126	136886626
chr9	137240883	137241383
chr10	102917896	102918396
chr11	6234607	6235107
chr11	9460694	9461194
chr11	17276372	17276872
chr11	62831880	62832380
chr11	64778589	64779089
chr11	68121248	68121748
chr11	75814874	75815374
chr11	95231099	95231599
chr11	126268778	126269278
chr12	53379605	53380105
chr12	54280357	54280857
chr12	55973604	55974104
chr12	56104179	56104679
chr12	56127895	56128395
chr12	92145706	92146206
chr12	95217377	95217877
chr13	31162151	31162651
chr13	45341000	45341500
chr13	49443920	49444420
chr13	95676783	95677283
chr14	20461499	20461999
chr14	39174837	39175337
chr14	44961881	44962381
chr14	49620468	49620968
chr14	49862724	49863224
chr14	74084397	74084897
chr14	74493214	74493714
chr14	81533649	81534149
chr14	99481026	99481526
chr14	101947974	101948474
chr14	104752446	104752946
chr15	76931383	76931883
chr15	89334640	89335140
chr15	97960214	97960714
chr16	1782531	1783031
chr16	2155266	2155766
chr16	9091254	9091754
chr16	21520304	21520804
chr16	22190351	22190851
chr16	30657982	30658482
chr16	50741681	50742181
chr16	67806402	67806902
chr16	77190537	77191037
chr17	4967218	4967718
chr17	19378112	19378612
chr17	41689114	41689614
chr17	47649466	47649966
chr17	48892338	48892838
chr17	75855287	75855787
chr17	82022859	82023359
chr17	82458347	82458847
chr17	83051704	83052204
chr18	62714863	62715363
chr19	4342536	4343036
chr19	4471759	4472259
chr19	7943591	7944091
chr19	11374808	11375308
chr19	12938219	12938719
chr19	14136473	14136973
chr19	18281581	18282081
chr19	19385443	19385943
chr19	33302395	33302895
chr19	35748203	35748703
chr19	40777841	40778341
chr19	42075725	42076225
chr19	44890716	44891216
chr19	45995100	45995600
chr19	49496007	49496507
chr19	49676609	49677109
chr19	49869322	49869822
chr19	54189767	54190267
chr19	54190617	54191117
chr19	55461510	55462010
chr20	3767659	3768159
chr20	23361828	23362328
chr20	35742111	35742611
chr21	36156185	36156685
chr22	23839003	23839503
chr1	10210162	10210662
chr1	15524277	15524777
chr1	17119274	17119774
chr1	23344191	23344691
chr1	25997981	25998481
chr1	30718041	30718541
chr1	38859550	38860050
chr1	44799982	44800482
chr1	65420113	65420613
chr1	66924688	66925188
chr1	109984439	109984939
chr1	113904736	113905236
chr1	150629017	150629517
chr1	155308464	155308964
chr1	159780576	159781076
chr1	192808704	192809204
chr1	207822573	207823073
chr1	228457709	228458209
chr2	676663	677163
chr2	46698802	46699302
chr2	65129995	65130495
chr2	207711256	207711756
chr2	218270154	218270654
chr3	27484338	27484838
chr3	52057172	52057672
chr3	93979826	93980326
chr3	130111317	130111817
chr3	197736760	197737260
chr4	337426	337926
chr4	473983	474483
chr4	1289516	1290016
chr4	37686206	37686706
chr4	51842697	51843197
chr4	88284519	88285019
chr4	101347447	101347947
chr4	183658982	183659482
chr5	43313261	43313761
chr5	90529468	90529968
chr5	91380071	91380571
chr5	119268408	119268908
chr5	127030391	127030891
chr5	151771265	151771765
chr5	160119462	160119962
chr5	179698584	179699084
chr6	31271928	31272428
chr6	31739637	31740137
chr6	143843038	143843538
chr7	6008965	6009465
chr7	21427168	21427668
chr7	21427736	21428236
chr7	25125138	25125638
chr7	67302355	67302855
chr7	76359069	76359569
chr8	9555602	9556102
chr8	11802361	11802861
chr8	42152541	42153041
chr8	102412638	102413138
chr8	125430011	125430511
chr8	144104086	144104586
chr9	35111449	35111949
chr9	35604002	35604502
chr9	71911048	71911548
chr9	99104754	99105254
chr9	120714375	120714875
chr9	127771220	127771720
chr9	128067223	128067723
chr9	128067804	128068304
chr9	129080720	129081220
chr10	3785198	3785698
chr10	25016300	25016800
chr10	68900986	68901486
chr10	110919081	110919581
chr10	132537229	132537729
chr11	43680315	43680815
chr11	45847046	45847546
chr11	59615707	59616207
chr11	64284475	64284975
chr11	67508069	67508569
chr11	119121150	119121650
chr11	123061999	123062499
chr11	125592507	125593007
chr12	6753432	6753932
chr12	45990625	45991125
chr12	49741188	49741688
chr12	56645900	56646400
chr12	89709414	89709914
chr12	98593337	98593837
chr13	19958368	19958868
chr13	28718815	28719315
chr13	42271585	42272085
chr14	22929277	22929777
chr14	23301632	23302132
chr14	24147090	24147590
chr14	73458416	73458916
chr14	75258943	75259443
chr14	75278241	75278741
chr14	75294029	75294529
chr14	77097954	77098454
chr14	77616563	77617063
chr14	103715311	103715811
chr15	31326302	31326802
chr15	92904062	92904562
chr16	589330	589830
chr16	2214870	2215370
chr16	30378089	30378589
chr16	30922432	30922932
chr16	46689060	46689560
chr16	56931785	56932285
chr16	57735405	57735905
chr16	75464527	75465027
chr16	89490522	89491022
chr17	1516508	1517008
chr17	3892892	3893392
chr17	7931808	7932308
chr17	28335302	28335802
chr17	47970743	47971243
chr17	49788889	49789389
chr17	75456314	75456814
chr17	78840797	78841297
chr17	81222825	81223325
chr17	81238901	81239401
chr18	9136346	9136846
chr18	32092306	32092806
chr18	35240755	35241255
chr18	57398188	57398688
chr19	1490742	1491242
chr19	2900533	2901033
chr19	2950526	2951026
chr19	3572473	3572973
chr19	4723657	4724157
chr19	6424727	6425227
chr19	7829657	7830157
chr19	10717723	10718223
chr19	17309212	17309712
chr19	17470052	17470552
chr19	18322896	18323396
chr19	18919290	18919790
chr19	19063537	19064037
chr19	32971866	32972366
chr19	35757814	35758314
chr19	36014105	36014605
chr19	39390990	39391490
chr19	39970796	39971296
chr19	40750431	40750931
chr19	45584260	45584760
chr19	49877711	49878211
chr19	50025249	50025749
chr19	50329024	50329524
chr19	52189518	52190018
chr19	56121284	56121784
chr20	31723417	31723917
chr20	33993008	33993508
chr20	50274847	50275347
chr20	62794089	62794589
chr21	33641581	33642081
chr22	29603241	29603741
chr22	41589818	41590318
chr22	46035662	46036162
chr1	1115990	1116490
chr1	6613323	6613823
chr1	9539062	9539562
chr1	23368192	23368692
chr1	24642848	24643348
chr1	26542196	26542696
chr1	28259188	28259688
chr1	30824315	30824815
chr1	36149379	36149879
chr1	42766942	42767442
chr1	46132786	46133286
chr1	67684864	67685364
chr1	88992703	88993203
chr1	169485804	169486304
chr1	182391593	182392093
chr1	184754726	184755226
chr1	212285118	212285618
chr1	212608422	212608922
chr1	225777520	225778020
chr1	244451781	244452281
chr2	9630869	9631369
chr2	26345677	26346177
chr2	43226436	43226936
chr2	54723243	54723743
chr2	74833781	74834281
chr2	86441068	86441568
chr2	100562620	100563120
chr2	130342561	130343061
chr2	178451065	178451565
chr2	218367659	218368159
chr3	9396768	9397268
chr3	31532221	31532721
chr3	38136990	38137490
chr3	41961962	41962462
chr3	48088751	48089251
chr3	49411896	49412396
chr3	51384874	51385374
chr3	98522688	98523188
chr3	129183704	129184204
chr4	932098	932598
chr4	158671961	158672461
chr4	183504390	183504890
chr4	185396360	185396860
chr5	33440597	33441097
chr5	55994855	55995355
chr5	109409848	109410348
chr5	111512428	111512928
chr5	142770059	142770559
chr5	146182518	146183018
chr5	151080837	151081337
chr6	29942197	29942697
chr6	30717350	30717850
chr6	31620203	31620703
chr6	32968335	32968835
chr6	32971691	32972191
chr6	35688774	35689274
chr6	37169704	37170204
chr7	36152712	36153212
chr7	66844730	66845230
chr7	73522100	73522600
chr7	77696091	77696591
chr7	105012885	105013385
chr7	112450087	112450587
chr7	127651754	127652254
chr7	158829418	158829918
chr8	30082890	30083390
chr8	41528880	41529380
chr8	47627624	47628124
chr8	100721973	100722473
chr8	100951848	100952348
chr8	102238834	102239334
chr8	108443290	108443790
chr8	141128202	141128702
chr9	113221209	113221709
chr9	136790734	136791234
chr10	6202657	6203157
chr10	70170356	70170856
chr10	72331901	72332401
chr10	95693819	95694319
chr10	102501963	102502463
chr10	132335351	132335851
chr11	694937	695437
chr11	10857879	10858379
chr11	13277366	13277866
chr11	44565123	44565623
chr11	57667579	57668079
chr11	62754003	62754503
chr11	64241117	64241617
chr11	65615192	65615692
chr11	66958330	66958830
chr11	67353412	67353912
chr11	73761016	73761516
chr11	74170857	74171357
chr11	108222678	108223178
chr11	119381487	119381987
chr12	6852208	6852708
chr12	26938148	26938648
chr12	49707360	49707860
chr12	50111662	50112162
chr12	52032829	52033329
chr12	55817645	55818145
chr12	57520357	57520857
chr12	103929869	103930369
chr12	113221005	113221505
chr12	122225935	122226435
chr13	109786379	109786879
chr13	110712936	110713436
chr13	110915116	110915616
chr14	21269361	21269861
chr14	21455954	21456454
chr14	63641760	63642260
chr14	102524521	102525021
chr15	65792170	65792670
chr16	75517162	75517662
chr16	84504508	84505008
chr17	1456087	1456587
chr17	4710259	4710759
chr17	5486117	5486617
chr17	21284330	21284830
chr17	45148057	45148557
chr17	45317034	45317534
chr17	63773461	63773961
chr17	75154378	75154878
chr17	76264888	76265388
chr17	76671570	76672070
chr17	77958283	77958783
chr18	9475085	9475585
chr19	1268911	1269411
chr19	2783211	2783711
chr19	4402173	4402673
chr19	11435259	11435759
chr19	12791151	12791651
chr19	14518435	14518935
chr19	17226279	17226779
chr19	18192634	18193134
chr19	35740436	35740936
chr19	36054163	36054663
chr19	41263757	41264257
chr19	42268212	42268712
chr19	48713978	48714478
chr19	48993231	48993731
chr19	51367494	51367994
chr20	5126635	5127135
chr20	17682147	17682647
chr20	40689064	40689564
chr20	49277941	49278441
chr20	59032203	59032703
chr21	33479740	33480240
chr21	33542692	33543192
chr21	37267291	37267791
chr21	42974015	42974515
chr22	38181696	38182196
chr22	40636549	40637049
chr22	43015034	43015534
chr1	7783780	7784280
chr1	24744875	24745375
chr1	26864927	26865427
chr1	36385814	36386314
chr1	42682103	42682603
chr1	89994824	89995324
chr1	109426240	109426740
chr1	153670801	153671301
chr1	153727678	153728178
chr1	153922823	153923323
chr1	180631697	180632197
chr1	225924107	225924607
chr1	226002034	226002534
chr1	244652591	244653091
chr2	8583594	8584094
chr2	8681700	8682200
chr2	10448196	10448696
chr2	73233125	73233625
chr2	112054051	112054551
chr2	207529642	207530142
chr2	207769808	207770308
chr2	218370325	218370825
chr3	10173786	10174286
chr3	16264860	16265360
chr3	38164904	38165404
chr3	46089220	46089720
chr3	49939750	49940250
chr3	66997909	66998409
chr3	81760994	81761494
chr3	114056346	114056846
chr3	121834894	121835394
chr3	136861853	136862353
chr4	8199001	8199501
chr4	48341084	48341584
chr4	82284772	82285272
chr4	102827682	102828182
chr4	119212322	119212822
chr4	122732304	122732804
chr4	127965067	127965567
chr4	129093358	129093858
chr4	152779581	152780081
chr5	32312834	32313334
chr5	98773263	98773763
chr5	132490636	132491136
chr5	150412653	150413153
chr5	172188181	172188681
chr6	2765070	2765570
chr6	11537248	11537748
chr6	12011199	12011699
chr6	18155085	18155585
chr6	26123766	26124266
chr6	30213218	30213718
chr6	30489184	30489684
chr6	30617162	30617662
chr6	33249089	33249589
chr6	33410193	33410693
chr6	33417960	33418460
chr6	36678389	36678889
chr6	108074553	108075053
chr6	110874473	110874973
chr6	146543380	146543880
chr6	151390292	151390792
chr7	149081	149581
chr7	1459434	1459934
chr7	7640363	7640863
chr7	7968460	7968960
chr7	26864489	26864989
chr7	27662785	27663285
chr7	30504693	30505193
chr7	44082362	44082862
chr7	106284836	106285336
chr7	112206227	112206727
chr7	123534537	123535037
chr7	135211365	135211865
chr7	152463741	152464241
chr8	92965905	92966405
chr8	143609490	143609990
chr9	6681078	6681578
chr9	35072465	35072965
chr9	93095826	93096326
chr9	132354915	132355415
chr9	137200629	137201129
chr10	1048732	1049232
chr10	72297875	72298375
chr10	97640378	97640878
chr10	100373198	100373698
chr10	110211020	110211520
chr10	123154070	123154570
chr10	126041791	126042291
chr11	9573253	9573753
chr11	10808759	10809259
chr11	47176723	47177223
chr11	66480087	66480587
chr11	66638253	66638753
chr11	130069519	130070019
chr12	53500622	53501122
chr12	53625847	53626347
chr12	67268619	67269119
chr12	120686213	120686713
chr12	121352246	121352746
chr13	19863536	19864036
chr13	27620412	27620912
chr14	24114440	24114940
chr14	35826049	35826549
chr14	61695300	61695800
chr14	64540335	64540835
chr14	71320042	71320542
chr14	100238482	100238982
chr14	105490714	105491214
chr15	43791921	43792421
chr15	99733263	99733763
chr16	2882511	2883011
chr16	3003765	3004265
chr16	11742694	11743194
chr16	18801396	18801896
chr16	23557176	23557676
chr17	3048803	3049303
chr17	15999491	15999991
chr17	18183198	18183698
chr17	42676921	42677421
chr17	49192693	49193193
chr17	50866288	50866788
chr17	76501261	76501761
chr18	51197649	51198149
chr18	62186882	62187382
chr18	74495992	74496492
chr18	79679216	79679716
chr19	796820	797320
chr19	2096615	2097115
chr19	8389970	8390470
chr19	10380451	10380951
chr19	13151641	13152141
chr19	14529220	14529720
chr19	15125570	15126070
chr19	15379631	15380131
chr19	15418869	15419369
chr19	40444514	40445014
chr19	45717229	45717729
chr19	58380920	58381420
chr19	58440058	58440558
chr21	14383057	14383557
chr21	28992742	28993242
chr22	37658283	37658783
chr22	38705387	38705887
chr22	41286108	41286608
chr1	7954019	7954519
chr1	12019111	12019611
chr1	16913735	16914235
chr1	25022328	25022828
chr1	31938233	31938733
chr1	33036728	33037228
chr1	53945719	53946219
chr1	145979353	145979853
chr1	150235922	150236422
chr1	151347087	151347587
chr1	155227361	155227861
chr1	156500691	156501191
chr1	156767179	156767679
chr1	203007099	203007599
chr1	207321289	207321789
chr1	244048162	244048662
chr2	24971501	24972001
chr2	70142275	70142775
chr2	96857884	96858384
chr2	112275242	112275742
chr2	112645520	112646020
chr2	119283967	119284467
chr2	200811600	200812100
chr2	218381834	218382334
chr2	237966592	237967092
chr2	240560987	240561487
chr3	49469927	49470427
chr3	50299383	50299883
chr3	50337290	50337790
chr3	100709126	100709626
chr3	139389495	139389995
chr3	160399041	160399541
chr4	7067937	7068437
chr4	10018775	10019275
chr4	15002147	15002647
chr4	17577158	17577658
chr4	17810542	17811042
chr4	20700110	20700610
chr4	184649316	184649816
chr5	56909670	56910170
chr5	61408600	61409100
chr5	72308209	72308709
chr5	81750899	81751399
chr5	83077187	83077687
chr5	95646570	95647070
chr5	95961683	95962183
chr5	109689117	109689617
chr5	131635094	131635594
chr5	137754187	137754687
chr5	139560997	139561497
chr5	148826233	148826733
chr5	173056977	173057477
chr6	11232451	11232951
chr6	28335354	28335854
chr6	85643165	85643665
chr6	85678559	85679059
chr6	151452036	151452536
chr6	162727568	162728068
chr7	2844169	2844669
chr7	6081294	6081794
chr7	30284213	30284713
chr7	44848016	44848516
chr7	56051431	56051931
chr7	65006502	65007002
chr7	76379801	76380301
chr7	77798430	77798930
chr7	99472532	99473032
chr7	151057793	151058293
chr7	151227074	151227574
chr8	51898970	51899470
chr8	56211252	56211752
chr8	66667063	66667563
chr8	109539370	109539870
chr8	133571802	133572302
chr8	140464574	140465074
chr8	143829159	143829659
chr9	6757406	6757906
chr9	33024909	33025409
chr9	93119892	93120392
chr9	100098900	100099400
chr9	125143364	125143864
chr9	127699205	127699705
chr9	127980880	127981380
chr9	129642047	129642547
chr10	3172618	3173118
chr10	12068553	12069053
chr10	73096777	73097277
chr10	102245215	102245715
chr10	104268856	104269356
chr10	118754893	118755393
chr10	119596963	119597463
chr11	809342	809842
chr11	1760397	1760897
chr11	64305180	64305680
chr11	64917095	64917595
chr11	73779327	73779827
chr11	83285795	83286295
chr11	106022141	106022641
chr11	106077268	106077768
chr12	6470500	6471000
chr12	6663077	6663577
chr12	10212224	10212724
chr12	31728764	31729264
chr12	48682072	48682572
chr12	57752226	57752726
chr12	125049464	125049964
chr13	44141808	44142308
chr13	51584105	51584605
chr13	76886262	76886762
chr14	34462111	34462611
chr14	50312039	50312539
chr14	90828015	90828515
chr14	95534681	95535181
chr14	103333868	103334368
chr15	41230925	41231425
chr15	70099498	70099998
chr15	75451682	75452182
chr15	89087971	89088471
chr15	90954570	90955070
chr16	2223224	2223724
chr16	3400860	3401360
chr16	10743969	10744469
chr16	30065377	30065877
chr16	30634135	30634635
chr16	48541934	48542434
chr16	70381221	70381721
chr17	3636132	3636632
chr17	8156377	8156877
chr17	11997285	11997785
chr17	21043159	21043659
chr17	40287461	40287961
chr17	42154873	42155373
chr17	44186531	44187031
chr17	57084801	57085301
chr17	82698581	82699081
chr18	12990984	12991484
chr18	47930964	47931464
chr19	506908	507408
chr19	1205355	1205855
chr19	1249464	1249964
chr19	2475807	2476307
chr19	3505878	3506378
chr19	6737411	6737911
chr19	9834904	9835404
chr19	10870872	10871372
chr19	14419243	14419743
chr19	38930575	38931075
chr19	39341822	39342322
chr19	40348272	40348772
chr19	47048498	47048998
chr19	47112962	47113462
chr19	47515036	47515536
chr19	49640265	49640765
chr19	53103262	53103762
chr20	3889010	3889510
chr20	50153584	50154084
chr22	20858628	20859128
chr22	36776118	36776618
chr1	1231833	1232333
chr1	1615153	1615653
chr1	2586296	2586796
chr1	17233710	17234210
chr1	32650878	32651378
chr1	35192983	35193483
chr1	40691394	40691894
chr1	51878627	51879127
chr1	119140440	119140940
chr1	150876531	150877031
chr1	151790324	151790824
chr1	235504375	235504875
chr1	246566134	246566634
chr2	10812621	10813121
chr2	20051509	20052009
chr2	24047243	24047743
chr2	60881262	60881762
chr2	64989044	64989544
chr2	159712195	159712695
chr2	203014438	203014938
chr2	214809739	214810239
chr2	219279054	219279554
chr2	231710169	231710669
chr3	9731096	9731596
chr3	20186040	20186540
chr3	48439943	48440443
chr3	48556708	48557208
chr3	52536221	52536721
chr3	57597217	57597717
chr3	120742329	120742829
chr3	125915784	125916284
chr3	136752385	136752885
chr3	143971801	143972301
chr3	150546320	150546820
chr3	155854399	155854899
chr4	2963205	2963705
chr4	3074338	3074838
chr4	7042813	7043313
chr4	39182107	39182607
chr4	73069593	73070093
chr4	140523822	140524322
chr4	151099244	151099744
chr4	185425720	185426220
chr5	271310	271810
chr5	81971750	81972250
chr5	115544553	115545053
chr5	123423212	123423712
chr5	139403891	139404391
chr6	24721069	24721569
chr6	30719960	30720460
chr6	36441333	36441833
chr6	37819167	37819667
chr6	81753153	81753653
chr6	159789494	159789994
chr7	44796309	44796809
chr7	100369096	100369596
chr7	102748573	102749073
chr7	151028078	151028578
chr8	42843119	42843619
chr8	58396638	58397138
chr8	109334019	109334519
chr8	144078373	144078873
chr9	35657725	35658225
chr9	83980057	83980557
chr9	129036238	129036738
chr9	129343742	129344242
chr9	131373297	131373797
chr9	136849107	136849607
chr10	5889826	5890326
chr10	43455474	43455974
chr10	70146465	70146965
chr10	99430644	99431144
chr10	102503629	102504129
chr11	568261	568761
chr11	2400349	2400849
chr11	13668316	13668816
chr11	14892039	14892539
chr11	18634228	18634728
chr11	33161350	33161850
chr11	62665004	62665504
chr11	63974237	63974737
chr11	64269810	64270310
chr11	65418911	65419411
chr11	66616257	66616757
chr11	72112163	72112663
chr11	77994671	77995171
chr12	12562548	12563048
chr12	46372588	46373088
chr12	56117899	56118399
chr12	71663671	71664171
chr12	111405567	111406067
chr12	112125218	112125718
chr13	30617465	30617965
chr13	51452892	51453392
chr13	72727444	72727944
chr14	24141418	24141918
chr14	35045999	35046499
chr14	63543236	63543736
chr14	99683815	99684315
chr15	45279051	45279551
chr15	58770973	58771473
chr15	64989610	64990110
chr15	74615485	74615985
chr15	75453803	75454303
chr15	92809011	92809511
chr16	2531786	2532286
chr16	81007280	81007780
chr16	87950808	87951308
chr16	89115217	89115717
chr17	1684660	1685160
chr17	2399441	2399941
chr17	2401466	2401966
chr17	7239453	7239953
chr17	7251799	7252299
chr17	17839992	17840492
chr17	18039049	18039549
chr17	21213980	21214480
chr17	28041389	28041889
chr17	28952236	28952736
chr17	35809174	35809674
chr17	59155044	59155544
chr17	64975256	64975756
chr17	68457516	68458016
chr17	75289253	75289753
chr17	75979302	75979802
chr17	82519376	82519876
chr18	12947671	12948171
chr18	21704591	21705091
chr18	21740421	21740921
chr18	79068931	79069431
chr18	80033915	80034415
chr19	2944821	2945321
chr19	4065743	4066243
chr19	8412966	8413466
chr19	13795038	13795538
chr19	17075356	17075856
chr19	32675010	32675510
chr19	35909219	35909719
chr19	41859881	41860381
chr19	45692290	45692790
chr19	46600706	46601206
chr19	48619075	48619575
chr20	35616145	35616645
chr21	42892904	42893404
chr22	21641900	21642400
chr22	37844133	37844633
chr1	7704394	7704894
chr1	18902624	18903124
chr1	26233841	26234341
chr1	45491067	45491567
chr1	77978936	77979436
chr1	160098804	160099304
chr1	183635588	183636088
chr1	226662845	226663345
chr1	230978680	230979180
chr1	234610772	234611272
chr2	28392550	28393050
chr2	36966468	36966968
chr2	96815949	96816449
chr2	97663917	97664417
chr2	190880477	190880977
chr2	218395946	218396446
chr2	231514172	231514672
chr2	238288639	238289139
chr2	241314987	241315487
chr3	25664734	25665234
chr3	48465489	48465989
chr3	53891755	53892255
chr3	88058810	88059310
chr3	101849178	101849678
chr3	126971839	126972339
chr3	143971174	143971674
chr3	157159997	157160497
chr3	183099361	183099861
chr4	2843541	2844041
chr4	112231461	112231961
chr4	118278421	118278921
chr5	134226062	134226562
chr5	141618810	141619310
chr5	176537728	176538228
chr6	16128765	16129265
chr6	31815132	31815632
chr6	36594020	36594520
chr6	38702947	38703447
chr6	52284681	52285181
chr6	53359209	53359709
chr6	89080457	89080957
chr6	108559368	108559868
chr7	1160066	1160566
chr7	12687283	12687783
chr7	35800794	35801294
chr7	39949344	39949844
chr7	73578481	73578981
chr7	100148527	100149027
chr7	112939783	112940283
chr7	122144092	122144592
chr7	134646497	134646997
chr7	139359539	139360039
chr7	155297484	155297984
chr8	13133138	13133638
chr8	22109244	22109744
chr8	23528610	23529110
chr8	93916522	93917022
chr8	116766191	116766691
chr8	124474499	124474999
chr8	143553375	143553875
chr9	36258287	36258787
chr9	96449819	96450319
chr10	30434343	30434843
chr10	31759993	31760493
chr10	37976442	37976942
chr10	73811666	73812166
chr10	99620294	99620794
chr10	104121724	104122224
chr11	695485	695985
chr11	47407911	47408411
chr11	59668964	59669464
chr11	62591465	62591965
chr11	65471962	65472462
chr11	65570127	65570627
chr11	66288974	66289474
chr11	95789608	95790108
chr12	49069797	49070297
chr12	56360073	56360573
chr12	82358543	82359043
chr12	92593722	92594222
chr12	108731777	108732277
chr12	116737942	116738442
chr12	120686810	120687310
chr12	122526851	122527351
chr13	102596686	102597186
chr14	67619527	67620027
chr15	40108711	40109211
chr15	41774127	41774627
chr15	41972407	41972907
chr15	44728758	44729258
chr15	77420103	77420603
chr15	92882224	92882724
chr15	100602244	100602744
chr16	4253794	4254294
chr16	53130320	53130820
chr16	57185924	57186424
chr16	67561865	67562365
chr16	88662946	88663446
chr17	4731466	4731966
chr17	7614933	7615433
chr17	7844687	7845187
chr17	18314816	18315316
chr17	28318787	28319287
chr17	64919296	64919796
chr17	74872959	74873459
chr17	75046826	75047326
chr17	75779668	75780168
chr17	77140464	77140964
chr18	62522696	62523196
chr19	2977113	2977613
chr19	3557410	3557910
chr19	4791335	4791835
chr19	5680415	5680915
chr19	6110458	6110958
chr19	8513936	8514436
chr19	12333488	12333988
chr19	35628667	35629167
chr19	40576560	40577060
chr19	42396801	42397301
chr19	49487152	49487652
chr20	18507603	18508103
chr20	25390644	25391144
chr20	46689397	46689897
chr20	62238141	62238641
chr22	31290573	31291073
chr22	36387907	36388407
chr22	41381542	41382042
chr1	3624648	3625148
chr1	7961334	7961834
chr1	8817479	8817979
chr1	11980015	11980515
chr1	19485411	19485911
chr1	20661342	20661842
chr1	27490001	27490501
chr1	40040336	40040836
chr1	42846261	42846761
chr1	42924134	42924634
chr1	44807638	44808138
chr1	45521670	45522170
chr1	45686916	45687416
chr1	47314017	47314517
chr1	108746299	108746799
chr1	152048044	152048544
chr1	153945901	153946401
chr1	154558672	154559172
chr1	156338138	156338638
chr1	220879055	220879555
chr1	225999261	225999761
chr1	236281825	236282325
chr1	247210689	247211189
chr2	11154948	11155448
chr2	25878274	25878774
chr2	55050341	55050841
chr2	74198311	74198811
chr2	88691364	88691864
chr2	135531070	135531570
chr2	191677765	191678265
chr2	195656970	195657470
chr2	240560010	240560510
chr3	14651362	14651862
chr3	38024848	38025348
chr3	40453055	40453555
chr3	42804311	42804811
chr3	66500866	66501366
chr3	75435395	75435895
chr3	129439820	129440320
chr3	150762955	150763455
chr3	179562563	179563063
chr3	183636422	183636922
chr3	197554626	197555126
chr4	173370584	173371084
chr5	57173712	57174212
chr5	115169757	115170257
chr5	119070767	119071267
chr5	134370901	134371401
chr5	138331661	138332161
chr5	146446947	146447447
chr6	26157682	26158182
chr6	26659532	26660032
chr6	30066761	30067261
chr6	32178054	32178554
chr6	42563672	42564172
chr6	43059290	43059790
chr6	108558304	108558804
chr7	66654247	66654747
chr7	72828034	72828534
chr7	77536700	77537200
chr7	91264047	91264547
chr7	93232057	93232557
chr7	99504673	99505173
chr7	100612210	100612710
chr7	107890871	107891371
chr7	158704694	158705194
chr8	23335867	23336367
chr8	41577834	41578334
chr8	63168298	63168798
chr8	77000036	77000536
chr8	96645350	96645850
chr8	123072372	123072872
chr8	123416263	123416763
chr8	144137456	144137956
chr8	144147671	144148171
chr9	122905156	122905656
chr9	124861794	124862294
chr9	128275818	128276318
chr9	131598127	131598627
chr9	134371745	134372245
chr10	16817423	16817923
chr10	23438753	23439253
chr10	26860893	26861393
chr10	28302909	28303409
chr10	31603386	31603886
chr10	97687167	97687667
chr10	102641992	102642492
chr10	104232171	104232671
chr10	124916576	124917076
chr11	535435	535935
chr11	28107986	28108486
chr11	65888340	65888840
chr11	72103143	72103643
chr11	86069014	86069514
chr11	121292459	121292959
chr12	752218	752718
chr12	6534118	6534618
chr12	21501429	21501929
chr12	49322822	49323322
chr12	49828277	49828777
chr12	52051092	52051592
chr12	53441323	53441823
chr12	56300194	56300694
chr12	57088517	57089017
chr12	107093638	107094138
chr13	40666428	40666928
chr14	23006977	23007477
chr14	31026316	31026816
chr14	60091654	60092154
chr14	75427686	75428186
chr15	90387869	90388369
chr16	1964685	1965185
chr16	2340605	2341105
chr16	2905275	2905775
chr16	5097961	5098461
chr16	31459202	31459702
chr16	58629711	58630211
chr16	81096222	81096722
chr17	7014467	7014967
chr17	7403935	7404435
chr17	28812306	28812806
chr17	39980306	39980806
chr17	49707995	49708495
chr17	59707329	59707829
chr17	64145598	64146098
chr17	74748311	74748811
chr17	81683620	81684120
chr18	3448021	3448521
chr18	12377307	12377807
chr18	67516589	67517089
chr18	77114423	77114923
chr19	2151443	2151943
chr19	5686912	5687412
chr19	5720015	5720515
chr19	9819049	9819549
chr19	11597134	11597634
chr19	16659949	16660449
chr19	17859540	17860040
chr19	36115121	36115621
chr19	39412146	39412646
chr19	42242525	42243025
chr19	48493203	48493703
chr19	48965011	48965511
chr19	50431450	50431950
chr19	50658103	50658603
chr19	54448884	54449384
chr20	13638705	13639205
chr20	35772055	35772555
chr20	41028367	41028867
chr20	41317494	41317994
chr22	20020766	20021266
chr22	35299928	35300428
chr22	37199290	37199790
chr22	40044354	40044854
chr22	42079396	42079896
chr22	50582744	50583244
chr1	28247059	28247559
chr1	45583229	45583729
chr1	45750369	45750869
chr1	52702837	52703337
chr1	70410913	70411413
chr1	88683854	88684354
chr1	110963778	110964278
chr1	113812168	113812668
chr1	117605663	117606163
chr1	145996469	145996969
chr1	149886532	149887032
chr1	150579430	150579930
chr1	155688518	155689018
chr1	161389674	161390174
chr1	162561180	162561680
chr1	169893723	169894223
chr1	171781195	171781695
chr1	174999427	174999927
chr1	182604205	182604705
chr1	241640139	241640639
chr1	246931716	246932216
chr2	24076270	24076770
chr2	26785678	26786178
chr2	27212047	27212547
chr2	61764126	61764626
chr2	101308575	101309075
chr2	197515733	197516233
chr2	218568209	218568709
chr2	219206482	219206982
chr2	219543766	219544266
chr3	13479962	13480462
chr3	43621948	43622448
chr3	49021379	49021879
chr3	123584868	123585368
chr3	156674227	156674727
chr3	170222136	170222636
chr3	172750399	172750899
chr3	197959924	197960424
chr4	10116628	10117128
chr4	77156551	77157051
chr5	40679537	40680037
chr5	54310427	54310927
chr5	58459902	58460402
chr5	62412384	62412884
chr5	69093645	69094145
chr5	71586997	71587497
chr5	131796878	131797378
chr5	150409729	150410229
chr5	163437203	163437703
chr5	172765247	172765747
chr5	176388876	176389376
chr6	5003479	5003979
chr6	13302757	13303257
chr6	31971999	31972499
chr6	33391384	33391884
chr6	34248843	34249343
chr6	35342250	35342750
chr6	43629048	43629548
chr6	82247546	82248046
chr6	110815284	110815784
chr6	166956392	166956892
chr7	2631526	2632026
chr7	6104458	6104958
chr7	6374129	6374629
chr7	12686448	12686948
chr7	65872918	65873418
chr7	66996515	66997015
chr7	75914815	75915315
chr7	92134593	92135093
chr7	96321927	96322427
chr7	101252180	101252680
chr7	118183888	118184388
chr7	148884134	148884634
chr8	20197060	20197560
chr8	73878692	73879192
chr9	19127300	19127800
chr9	36190577	36191077
chr9	37465263	37465763
chr9	96418447	96418947
chr9	113275384	113275884
chr9	131656350	131656850
chr9	136545939	136546439
chr10	14837891	14838391
chr10	71851079	71851579
chr10	73625767	73626267
chr10	74150883	74151383
chr10	100912554	100913054
chr10	102152011	102152511
chr10	103918032	103918532
chr11	16738298	16738798
chr11	47767258	47767758
chr11	65890282	65890782
chr11	72722342	72722842
chr11	73983057	73983557
chr11	119057082	119057582
chr12	1796024	1796524
chr12	53005944	53006444
chr12	54324728	54325228
chr12	68332185	68332685
chr12	104456559	104457059
chr12	120495797	120496297
chr12	123383804	123384304
chr13	30465741	30466241
chr13	48532522	48533022
chr13	76991789	76992289
chr14	24242461	24242961
chr14	68757579	68758079
chr15	41283681	41284181
chr15	74872820	74873320
chr15	84716231	84716731
chr16	2673337	2673837
chr16	11797186	11797686
chr16	22297070	22297570
chr16	24539276	24539776
chr16	28950599	28951099
chr16	30558250	30558750
chr16	30697870	30698370
chr16	53703720	53704220
chr16	84617893	84618393
chr16	88700853	88701353
chr16	89873874	89874374
chr16	90077199	90077699
chr17	7307098	7307598
chr17	8152318	8152818
chr17	14300712	14301212
chr17	28644990	28645490
chr17	30378632	30379132
chr17	40417765	40418265
chr17	41688534	41689034
chr17	43483542	43484042
chr17	45060984	45061484
chr17	46193861	46194361
chr17	60677518	60678018
chr17	63842755	63843255
chr17	68247732	68248232
chr18	9913641	9914141
chr18	63422280	63422780
chr19	35745225	35745725
chr19	38374412	38374912
chr19	39833447	39833947
chr19	43668639	43669139
chr19	45001775	45002275
chr19	49453266	49453766
chr19	49876531	49877031
chr19	49877155	49877655
chr19	55516847	55517347
chr20	23358017	23358517
chr20	45972237	45972737
chr20	50190593	50191093
chr20	63864924	63865424
chr21	36319858	36320358
chr21	37366378	37366878
chr21	46458478	46458978
chr22	24555028	24555528
chr22	30423918	30424418
chr22	38506254	38506754
chrX	49191116	49191616
chr1	5992359	5992859
chr1	10032529	10033029
chr1	22052401	22052901
chr1	36223903	36224403
chr1	36450305	36450805
chr1	93180248	93180748
chr1	117059960	117060460
chr1	154936744	154937244
chr1	173867835	173868335
chr1	201955129	201955629
chr1	205631811	205632311
chr1	207751773	207752273
chr1	209784424	209784924
chr1	214602886	214603386
chr1	235328058	235328558
chr2	47906442	47906942
chr2	96265846	96266346
chr2	98749029	98749529
chr2	113756386	113756886
chr2	162343774	162344274
chr2	172555734	172556234
chr2	177264543	177265043
chr2	200525832	200526332
chr2	202634622	202635122
chr2	210171218	210171718
chr2	231781084	231781584
chr3	9749679	9750179
chr3	12663938	12664438
chr3	14178461	14178961
chr3	49007042	49007542
chr3	50359395	50359895
chr3	52154548	52155048
chr3	105868848	105869348
chr3	128123633	128124133
chr4	9152467	9152967
chr4	47914514	47915014
chr4	48830784	48831284
chr4	102868704	102869204
chr5	62403679	62404179
chr5	69166763	69167263
chr5	96808153	96808653
chr5	108382195	108382695
chr5	129094349	129094849
chr5	131170613	131171113
chr5	141636651	141637151
chr5	146203269	146203769
chr5	163460270	163460770
chr6	2245391	2245891
chr6	26021271	26021771
chr6	30742555	30743055
chr6	31158171	31158671
chr6	31462849	31463349
chr6	32128092	32128592
chr6	32439562	32440062
chr6	37257465	37257965
chr6	43174485	43174985
chr6	44246783	44247283
chr6	45377825	45378325
chr6	87702164	87702664
chr6	89081514	89082014
chr6	136250166	136250666
chr6	149545846	149546346
chr6	154733947	154734447
chr6	159762150	159762650
chr6	166382865	166383365
chr7	100673167	100673667
chr7	130440895	130441395
chr8	28889976	28890476
chr8	60516608	60517108
chr8	60652043	60652543
chr8	66113074	66113574
chr8	80030043	80030543
chr8	133526512	133527012
chr9	3525791	3526291
chr9	33076496	33076996
chr9	34048707	34049207
chr9	34178747	34179247
chr9	70418738	70419238
chr9	72305057	72305557
chr9	111896500	111897000
chr10	5813265	5813765
chr10	24724463	24724963
chr10	32346127	32346627
chr10	73744039	73744539
chr10	80453766	80454266
chr10	101818390	101818890
chr10	102132663	102133163
chr10	102394139	102394639
chr11	1389492	1389992
chr11	57712221	57712721
chr11	62123606	62124106
chr11	65121983	65122483
chr11	65477320	65477820
chr11	67630183	67630683
chr11	94493665	94494165
chr11	119095293	119095793
chr12	2812355	2812855
chr12	14803319	14803819
chr12	54497394	54497894
chr12	57547005	57547505
chr12	121663782	121664282
chr12	132887479	132887979
chr13	23375363	23375863
chr13	60163781	60164281
chr14	45134291	45134791
chr14	59188350	59188850
chr14	61525296	61525796
chr14	65102310	65102810
chr14	72926084	72926584
chr15	44536828	44537328
chr15	66386568	66387068
chr15	83108530	83109030
chr16	1611928	1612428
chr16	2537584	2538084
chr16	3134695	3135195
chr16	4616118	4616618
chr16	30429927	30430427
chr16	67183421	67183921
chr16	74984939	74985439
chr16	87391869	87392369
chr17	13017871	13018371
chr17	17836124	17836624
chr17	76493074	76493574
chr17	76737198	76737698
chr17	78186952	78187452
chr18	50287702	50288202
chr18	50878770	50879270
chr19	1652750	1653250
chr19	6372401	6372901
chr19	8832439	8832939
chr19	11346165	11346665
chr19	12294677	12295177
chr19	13747538	13748038
chr19	17305266	17305766
chr19	18152307	18152807
chr19	35281874	35282374
chr19	35931431	35931931
chr19	38402791	38403291
chr19	40425806	40426306
chr19	40465622	40466122
chr19	45370406	45370906
chr19	45863024	45863524
chr19	47256683	47257183
chr19	48321753	48322253
chr19	48637480	48637980
chr19	58466715	58467215
chr20	3820540	3821040
chr20	5119847	5120347
chr20	5610784	5611284
chr20	43457582	43458082
chr20	56392157	56392657
chr21	25734711	25735211
chr21	32771812	32772312
chr22	20917053	20917553
chr22	41620951	41621451
chr1	113072883	113073383
chr1	179882339	179882839
chr1	207825662	207826162
chr2	3558138	3558638
chr2	74529624	74530124
chr2	102227676	102228176
chr2	219229435	219229935
chr2	224585415	224585915
chr3	14432169	14432669
chr3	23916824	23917324
chr3	46979392	46979892
chr3	49093851	49094351
chr3	157174891	157175391
chr4	39527379	39527879
chr4	119454404	119454904
chr4	152535906	152536406
chr5	1385684	1386184
chr5	112976462	112976962
chr5	140564481	140564981
chr5	172714724	172715224
chr6	13615026	13615526
chr6	30781666	30782166
chr6	53547879	53548379
chr6	71420652	71421152
chr7	5530429	5530929
chr7	26200622	26201122
chr7	42911821	42912321
chr7	76166424	76166924
chr7	92528405	92528905
chr7	134458947	134459447
chr8	17922423	17922923
chr8	47737902	47738402
chr8	89757519	89758019
chr9	36487587	36488087
chr9	75088147	75088647
chr9	109972202	109972702
chr9	120842749	120843249
chr9	134024982	134025482
chr10	84139189	84139689
chr11	207192	207692
chr11	65421146	65421646
chr12	7018623	7019123
chr12	8242865	8243365
chr12	26114344	26114844
chr12	51172912	51173412
chr12	75390860	75391360
chr12	128823789	128824289
chr12	133130266	133130766
chr13	52012030	52012530
chr13	52652490	52652990
chr13	110870216	110870716
chr14	21476850	21477350
chr14	54509507	54510007
chr14	77321146	77321646
chr14	91510317	91510817
chr15	45198468	45198968
chr15	70097727	70098227
chr15	84654071	84654571
chr15	90717004	90717504
chr18	74291831	74292331
chr19	2269149	2269649
chr19	2702526	2703026
chr19	2841030	2841530
chr19	12790072	12790572
chr19	17747364	17747864
chr19	21141728	21142228
chr19	35702250	35702750
chr19	39398193	39398693
chr19	40777333	40777833
chr19	46859989	46860489
chr19	48363967	48364467
chr19	55599439	55599939
chr20	23350442	23350942
chr20	33686281	33686781
chr20	57718351	57718851
chr20	58388895	58389395
chr22	28800363	28800863
chr22	41832719	41833219
chr22	42090649	42091149
chr22	42614712	42615212
chr1	3900550	3901050
chr1	3901175	3901675
chr1	10398713	10399213
chr1	11805794	11806294
chr1	22451572	22452072
chr1	25430528	25431028
chr1	27772860	27773360
chr1	32394266	32394766
chr1	32817303	32817803
chr1	41802800	41803300
chr1	43946399	43946899
chr1	59296686	59297186
chr1	110338253	110338753
chr1	154220444	154220944
chr1	167935980	167936480
chr1	206579838	206580338
chr2	38751139	38751639
chr2	43595868	43596368
chr2	63840661	63841161
chr2	170928813	170929313
chr2	203656688	203657188
chr2	218406203	218406703
chr2	233251314	233251814
chr2	238060640	238061140
chr2	241508459	241508959
chr3	42590563	42591063
chr3	51941852	51942352
chr3	61251244	61251744
chr3	100401204	100401704
chr3	115147675	115148175
chr3	184174487	184174987
chr3	196081928	196082428
chr4	52712085	52712585
chr4	81471766	81472266
chr4	165112663	165113163
chr4	169620278	169620778
chr4	176319589	176320089
chr5	36241968	36242468
chr5	75511583	75512083
chr5	90409573	90410073
chr5	126776741	126777241
chr5	140639130	140639630
chr5	151252759	151253259
chr5	154754927	154755427
chr5	173056006	173056506
chr5	176647107	176647607
chr5	180809659	180810159
chr6	11093503	11094003
chr6	14121755	14122255
chr6	25992380	25992880
chr6	27146780	27147280
chr6	30571103	30571603
chr6	31652423	31652923
chr6	31958809	31959309
chr6	32666520	32667020
chr6	32844456	32844956
chr6	32940821	32941321
chr6	33454239	33454739
chr6	35259261	35259761
chr6	62286026	62286526
chr6	69796808	69797308
chr6	116279722	116280222
chr6	122399293	122399793
chr6	136289717	136290217
chr6	139134791	139135291
chr6	170554002	170554502
chr7	45768834	45769334
chr7	47669410	47669910
chr7	65750743	65751243
chr7	66493360	66493860
chr7	73557053	73557553
chr7	104983712	104984212
chr7	121396147	121396647
chr7	138459879	138460379
chr7	155298799	155299299
chr8	9150530	9151030
chr8	37762293	37762793
chr8	56074338	56074838
chr8	95133392	95133892
chr8	117520395	117520895
chr8	124998211	124998711
chr8	144827135	144827635
chr9	5628741	5629241
chr9	33264518	33265018
chr9	35814862	35815362
chr9	70413822	70414322
chr9	91423737	91424237
chr9	113401188	113401688
chr9	129413567	129414067
chr9	130712505	130713005
chr9	135961161	135961661
chr9	136483090	136483590
chr10	30433692	30434192
chr10	31031684	31032184
chr10	37857471	37857971
chr10	69123791	69124291
chr10	70403808	70404308
chr10	71888615	71889115
chr10	73785087	73785587
chr10	97292445	97292945
chr10	97498535	97499035
chr10	130110613	130111113
chr11	6619240	6619740
chr11	8682445	8682945
chr11	18321966	18322466
chr11	32583505	32584005
chr11	34438611	34439111
chr11	61815008	61815508
chr11	62573855	62574355
chr11	62727373	62727873
chr11	65382177	65382677
chr11	67239689	67240189
chr11	68030354	68030854
chr11	71786806	71787306
chr11	111926769	111927269
chr11	117098327	117098827
chr11	125070634	125071134
chr11	130002889	130003389
chr12	4320829	4321329
chr12	6555871	6556371
chr12	6873170	6873670
chr12	49018537	49019037
chr12	52069427	52069927
chr12	53054262	53054762
chr12	54279554	54280054
chr12	92929132	92929632
chr12	120200976	120201476
chr12	120317424	120317924
chr12	123232973	123233473
chr13	19633353	19633853
chr13	24922716	24923216
chr14	31457233	31457733
chr14	49892725	49893225
chr14	54396616	54397116
chr14	58298009	58298509
chr14	75002566	75003066
chr14	92748411	92748911
chr14	92793881	92794381
chr15	72474019	72474519
chr15	78872606	78873106
chr15	81324066	81324566
chr16	22191105	22191605
chr16	30748027	30748527
chr16	31142180	31142680
chr16	50024898	50025398
chr16	57244824	57245324
chr16	57300418	57300918
chr16	74666741	74667241
chr16	79770426	79770926
chr16	84116639	84117139
chr17	4142884	4143384
chr17	7484540	7485040
chr17	8435636	8436136
chr17	18363312	18363812
chr17	30564400	30564900
chr17	31596575	31597075
chr17	44344930	44345430
chr17	55421750	55422250
chr17	60392014	60392514
chr17	78359960	78360460
chr18	14132291	14132791
chr18	23503122	23503622
chr19	1103691	1104191
chr19	2168843	2169343
chr19	2427387	2427887
chr19	7198011	7198511
chr19	10333338	10333838
chr19	12140159	12140659
chr19	12890741	12891241
chr19	14006126	14006626
chr19	18023813	18024313
chr19	19776283	19776783
chr19	40285286	40285786
chr19	42220001	42220501
chr19	49118880	49119380
chr19	50804764	50805264
chr19	54208033	54208533
chr20	45812262	45812762
chr22	19122295	19122795
chr22	39292547	39293047
chr22	40951426	40951926
chr22	41448337	41448837
chrX	154378983	154379483
chr1	1399236	1399736
chr1	28581683	28582183
chr1	31644689	31645189
chr1	54764488	54764988
chr1	156193714	156194214
chr1	156457170	156457670
chr1	161225615	161226115
chr1	167553552	167554052
chr1	203305128	203305628
chr1	235128667	235129167
chr1	241519559	241520059
chr2	41840684	41841184
chr2	46542308	46542808
chr2	55617555	55618055
chr2	108448907	108449407
chr2	134918494	134918994
chr2	135985361	135985861
chr2	200713008	200713508
chr2	203238729	203239229
chr2	206159333	206159833
chr2	218733622	218734122
chr2	219388206	219388706
chr3	47513211	47513711
chr3	49358140	49358640
chr4	3955274	3955774
chr4	9691587	9692087
chr4	41990234	41990734
chr4	77158070	77158570
chr4	118591433	118591933
chr4	143513159	143513659
chr5	133051665	133052165
chr6	27838240	27838740
chr6	32853519	32854019
chr6	52419946	52420446
chr6	80004278	80004778
chr7	42932050	42932550
chr7	124929714	124930214
chr7	128739008	128739508
chr7	135170526	135171026
chr7	143381007	143381507
chr7	149838029	149838529
chr8	27774206	27774706
chr8	37695434	37695934
chr8	66613192	66613692
chr8	134832094	134832594
chr9	94726411	94726911
chr9	127245014	127245514
chr10	22003522	22004022
chr10	35126525	35127025
chr10	73997810	73998310
chr11	3422773	3423273
chr11	62621827	62622327
chr11	63671478	63671978
chr11	65354417	65354917
chr11	65711992	65712492
chr11	66051949	66052449
chr11	66312700	66313200
chr12	8026455	8026955
chr12	15882087	15882587
chr12	53492907	53493407
chr12	56333840	56334340
chr13	49936186	49936686
chr15	44711212	44711712
chr15	64162989	64163489
chr15	72272432	72272932
chr15	75640039	75640539
chr15	90233806	90234306
chr16	4847161	4847661
chr16	27549824	27550324
chr16	54929058	54929558
chr17	31901578	31902078
chr17	78782267	78782767
chr17	79074599	79075099
chr19	1812498	1812998
chr19	1905020	1905520
chr19	2041935	2042435
chr19	7069111	7069611
chr19	11505030	11505530
chr19	12610627	12611127
chr19	15836918	15837418
chr19	16324497	16324997
chr19	17267007	17267507
chr19	37370799	37371299
chr19	40443031	40443531
chr19	43503948	43504448
chr19	47349019	47349519
chr19	50724632	50725132
chr19	55166458	55166958
chr20	45910710	45911210
chr20	50510000	50510500
chr22	41091319	41091819
chrX	3814824	3815324
chr1	6579694	6580194
chr1	8026115	8026615
chr1	12184237	12184737
chr1	17635806	17636306
chr1	23980183	23980683
chr1	35557475	35557975
chr1	37595753	37596253
chr1	38012385	38012885
chr1	58546568	58547068
chr1	62436369	62436869
chr1	111449067	111449567
chr1	112395892	112396392
chr1	153967517	153968017
chr1	154982970	154983470
chr1	155001946	155002446
chr1	161202083	161202583
chr1	203795289	203795789
chr1	243255714	243256214
chr2	68252476	68252976
chr2	73071154	73071654
[truncated: 68,911 more rows]

## Sheet: RGC peakSet
The genomic coordinates of the peaks in RGC classes
Chromosome	Start	End
chr1	1115930	1116430
chr1	2189477	2189977
chr1	9910310	9910810
chr1	10210194	10210694
chr1	16904670	16905170
chr1	16913760	16914260
chr1	18956622	18957122
chr1	30718126	30718626
chr1	43946405	43946905
chr1	48472032	48472532
chr1	54053190	54053690
chr1	65420110	65420610
chr1	70410866	70411366
chr1	85276413	85276913
chr1	109984406	109984906
chr1	116372895	116373395
chr1	150629401	150629901
chr1	151281880	151282380
chr1	156767115	156767615
chr1	160098798	160099298
chr1	164558668	164559168
chr1	167220443	167220943
chr1	172532613	172533113
chr1	180631677	180632177
chr1	184754754	184755254
chr1	201170611	201171111
chr1	207751787	207752287
chr1	212285061	212285561
chr1	221741955	221742455
chr1	228139780	228140280
chr1	243255634	243256134
chr1	244451823	244452323
chr2	676636	677136
chr2	9630818	9631318
chr2	42361369	42361869
chr2	54723222	54723722
chr2	55050322	55050822
chr2	62705366	62705866
chr2	65130059	65130559
chr2	69914386	69914886
chr2	74653956	74654456
chr2	112054062	112054562
chr2	112275228	112275728
chr2	128027197	128027697
chr2	177212317	177212817
chr2	197453133	197453633
chr2	197499699	197500199
chr2	207165995	207166495
chr2	207529716	207530216
chr2	218270116	218270616
chr2	219543683	219544183
chr2	239401047	239401547
chr3	4492991	4493491
chr3	12810139	12810639
chr3	13479944	13480444
chr3	14948234	14948734
chr3	33440283	33440783
chr3	38024873	38025373
chr3	48663866	48664366
chr3	50235812	50236312
chr3	50299272	50299772
chr3	93979794	93980294
chr3	98522737	98523237
chr3	125915827	125916327
chr3	130111346	130111846
chr3	131381439	131381939
chr3	150546301	150546801
chr3	155870256	155870756
chr3	167734692	167735192
chr3	170222143	170222643
chr3	195442908	195443408
chr4	337399	337899
chr4	781773	782273
chr4	1346847	1347347
chr4	6269468	6269968
chr4	7068017	7068517
chr4	37686221	37686721
chr4	48341085	48341585
chr4	75724265	75724765
chr4	82900733	82901233
chr4	83034830	83035330
chr4	88284497	88284997
chr4	90127133	90127633
chr4	121870221	121870721
chr4	129093381	129093881
chr4	133148918	133149418
chr4	140523816	140524316
chr4	165112657	165113157
chr4	183658998	183659498
chr5	5421994	5422494
chr5	43121245	43121745
chr5	51383050	51383550
chr5	57173561	57174061
chr5	58582791	58583291
chr5	61331850	61332350
chr5	79514360	79514860
chr5	81750954	81751454
chr5	91383217	91383717
chr5	103258444	103258944
chr5	109409814	109410314
chr5	115169734	115170234
chr5	127030362	127030862
chr5	138464830	138465330
chr5	146182466	146182966
chr5	149960441	149960941
chr5	151771268	151771768
chr5	159100253	159100753
chr5	160119401	160119901
chr5	173887943	173888443
chr5	176647054	176647554
chr6	16128622	16129122
chr6	31827488	31827988
chr6	43013766	43014266
chr6	52284720	52285220
chr6	52419918	52420418
chr6	62286006	62286506
chr6	79537330	79537830
chr6	85678560	85679060
chr6	89080419	89080919
chr6	93419423	93419923
chr6	110874469	110874969
chr6	111873257	111873757
chr6	166627048	166627548
chr7	1459406	1459906
chr7	7640383	7640883
chr7	21427159	21427659
chr7	23013906	23014406
chr7	24980051	24980551
chr7	25125268	25125768
chr7	30284223	30284723
chr7	35037780	35038280
chr7	36152800	36153300
chr7	44606612	44607112
chr7	44748236	44748736
chr7	75738945	75739445
chr7	76379794	76380294
chr7	77536720	77537220
chr7	77696075	77696575
chr7	99504358	99504858
chr7	108525959	108526459
chr7	112450137	112450637
chr7	120950404	120950904
chr7	124929734	124930234
chr7	127651742	127652242
chr7	129224597	129225097
chr7	135211384	135211884
chr7	138002003	138002503
chr7	139359529	139360029
chr7	151028099	151028599
chr7	151057782	151058282
chr7	158704639	158705139
chr7	158829363	158829863
chr8	8228202	8228702
chr8	24913514	24914014
chr8	24956297	24956797
chr8	25458323	25458823
chr8	28889938	28890438
chr8	30082940	30083440
chr8	41528840	41529340
chr8	60516588	60517088
chr8	66667078	66667578
chr8	92965912	92966412
chr8	95133402	95133902
chr8	102864023	102864523
chr8	108443234	108443734
chr8	109333992	109334492
chr8	119873444	119873944
chr8	123416232	123416732
chr8	124474494	124474994
chr8	144827104	144827604
chr9	4792515	4793015
chr9	5437662	5438162
chr9	19380066	19380566
chr9	23826178	23826678
chr9	35072467	35072967
chr9	71911024	71911524
chr9	79571509	79572009
chr9	86282308	86282808
chr9	92764761	92765261
chr9	113221206	113221706
chr9	113401117	113401617
chr9	120714365	120714865
chr9	127396686	127397186
chr9	127980884	127981384
chr9	128067827	128068327
chr9	134025002	134025502
chr9	136790692	136791192
chr10	15168668	15169168
chr10	16817302	16817802
chr10	69123802	69124302
chr10	72273587	72274087
chr10	74826157	74826657
chr10	95561238	95561738
chr10	102501890	102502390
chr10	110919072	110919572
chr10	119596905	119597405
chr10	132517131	132517631
chr10	132537316	132537816
chr11	1389461	1389961
chr11	2400067	2400567
chr11	3797505	3798005
chr11	6234635	6235135
chr11	9460552	9461052
chr11	10808746	10809246
chr11	43680433	43680933
chr11	45847120	45847620
chr11	59615621	59616121
chr11	62831894	62832394
chr11	64241155	64241655
chr11	64305056	64305556
chr11	64878432	64878932
chr11	77994657	77995157
chr11	78188480	78188980
chr11	83156707	83157207
chr11	95231025	95231525
chr11	106077139	106077639
chr11	126268777	126269277
chr11	130069540	130070040
chr11	133956782	133957282
chr12	6852187	6852687
chr12	53079224	53079724
chr12	53727353	53727853
chr12	55973760	55974260
chr12	67269045	67269545
chr12	82686570	82687070
chr12	92145713	92146213
chr12	95217370	95217870
chr12	98593369	98593869
chr12	109713410	109713910
chr12	119988622	119989122
chr12	122225946	122226446
chr13	19958348	19958848
chr13	24922685	24923185
chr13	49443930	49444430
chr13	51584167	51584667
chr13	60163764	60164264
chr14	20343103	20343603
chr14	20682565	20683065
chr14	23301649	23302149
chr14	24114453	24114953
chr14	24242477	24242977
chr14	33950879	33951379
chr14	35826019	35826519
chr14	44961848	44962348
chr14	49862709	49863209
chr14	51094915	51095415
chr14	52552389	52552889
chr14	59188268	59188768
chr14	74084371	74084871
chr14	75294045	75294545
chr14	77616546	77617046
chr14	90828017	90828517
chr14	91060437	91060937
chr14	99480762	99481262
chr14	99683836	99684336
chr14	104752770	104753270
chr15	48810956	48811456
chr15	81324031	81324531
chr15	89088130	89088630
chr16	1342909	1343409
chr16	1782533	1783033
chr16	2905641	2906141
chr16	50741695	50742195
chr16	53503261	53503761
chr16	58499804	58500304
chr16	75464551	75465051
chr17	1716147	1716647
chr17	8630760	8631260
chr17	21284274	21284774
chr17	49764112	49764612
chr17	82022813	82023313
chr18	9475103	9475603
chr18	12377147	12377647
chr18	21740426	21740926
chr18	51197651	51198151
chr18	59359155	59359655
chr18	62522613	62523113
chr18	62714854	62715354
chr18	67516650	67517150
chr18	74291802	74292302
chr18	74495873	74496373
chr19	1268985	1269485
chr19	1490739	1491239
chr19	8389996	8390496
chr19	9819220	9819720
chr19	10870863	10871363
chr19	11374828	11375328
chr19	11435008	11435508
chr19	18203878	18204378
chr19	18522040	18522540
chr19	19385412	19385912
chr19	42268745	42269245
chr19	44890698	44891198
chr19	48993208	48993708
chr19	50658050	50658550
chr19	50724645	50725145
chr19	54137197	54137697
chr20	5126655	5127155
chr20	23361858	23362358
chr20	33993010	33993510
chr20	62238085	62238585
chr20	62794066	62794566
chr21	14383022	14383522
chr21	28992729	28993229
chr21	33641546	33642046
chr21	36156288	36156788
chr21	36319875	36320375
chr21	42496140	42496640
chr21	42974074	42974574
chr22	24555018	24555518
chr22	36387871	36388371
chr22	41286144	41286644
chr22	41589746	41590246
chr22	46035655	46036155
chr22	50582716	50583216
chr1	2474949	2475449
chr1	2586365	2586865
chr1	6613346	6613846
chr1	6785087	6785587
chr1	7704417	7704917
chr1	10032510	10033010
chr1	10398675	10399175
chr1	16613349	16613849
chr1	20661376	20661876
chr1	27725575	27726075
chr1	31644715	31645215
chr1	32394286	32394786
chr1	36149405	36149905
chr1	36306781	36307281
chr1	36385829	36386329
chr1	40040327	40040827
chr1	58783830	58784330
chr1	67684897	67685397
chr1	89994813	89995313
chr1	93180288	93180788
chr1	112395888	112396388
chr1	113904723	113905223
chr1	155859196	155859696
chr1	161390017	161390517
chr1	169106025	169106525
chr1	169485804	169486304
chr1	171781192	171781692
chr1	174999661	175000161
chr1	179293462	179293962
chr1	181088374	181088874
chr1	184386736	184387236
chr1	185156877	185157377
chr1	186375223	186375723
chr1	192808711	192809211
chr1	212857959	212858459
chr1	216723321	216723821
chr1	226939997	226940497
chr1	228165330	228165830
chr1	235367128	235367628
chr1	241519527	241520027
chr1	244652801	244653301
chr1	246566127	246566627
chr1	247210647	247211147
chr1	248837882	248838382
chr1	248838759	248839259
chr2	10812602	10813102
chr2	20446728	20447228
chr2	25041808	25042308
chr2	26345712	26346212
chr2	27370134	27370634
chr2	30146643	30147143
chr2	43595878	43596378
chr2	44168244	44168744
chr2	48314104	48314604
chr2	55617535	55618035
chr2	56183517	56184017
chr2	64751116	64751616
chr2	64989049	64989549
chr2	70686906	70687406
chr2	71227136	71227636
chr2	73233082	73233582
chr2	74458016	74458516
chr2	112645545	112646045
chr2	130342560	130343060
chr2	130355746	130356246
chr2	152717314	152717814
chr2	162343757	162344257
chr2	172555705	172556205
chr2	175168166	175168666
chr2	178451015	178451515
chr2	219278997	219279497
chr2	219388227	219388727
chr2	231781102	231781602
chr3	5187257	5187757
chr3	9731070	9731570
chr3	31532238	31532738
chr3	38136999	38137499
chr3	43621856	43622356
chr3	43769478	43769978
chr3	48088746	48089246
chr3	66997899	66998399
chr3	98901652	98902152
chr3	100401194	100401694
chr3	105868793	105869293
chr3	108222258	108222758
chr3	115147495	115147995
chr3	121834888	121835388
chr3	128680534	128681034
chr3	141737919	141738419
chr3	184561216	184561716
chr3	185937840	185938340
chr4	2242039	2242539
chr4	2261975	2262475
chr4	2536128	2536628
chr4	3292558	3293058
chr4	3955301	3955801
chr4	5892933	5893433
chr4	8158672	8159172
chr4	9152511	9153011
chr4	11428747	11429247
chr4	17577163	17577663
chr4	17810571	17811071
chr4	39182110	39182610
chr4	39527399	39527899
chr4	48780187	48780687
chr4	51842754	51843254
chr4	52712147	52712647
chr4	55395595	55396095
chr4	88592097	88592597
chr4	101347448	101347948
chr4	107720182	107720682
chr4	107989502	107990002
chr4	119212373	119212873
chr4	122732260	122732760
chr4	148442369	148442869
chr4	152535891	152536391
chr4	155376629	155377129
chr4	169620152	169620652
chr4	173334260	173334760
chr4	184649271	184649771
chr4	185209302	185209802
chr5	693182	693682
chr5	2751474	2751974
chr5	32312794	32313294
chr5	34929123	34929623
chr5	41903907	41904407
chr5	43313270	43313770
chr5	75511559	75512059
chr5	83077233	83077733
chr5	88660940	88661440
chr5	98773251	98773751
chr5	115544550	115545050
chr5	119268415	119268915
chr5	123423222	123423722
chr5	142770054	142770554
chr5	146203250	146203750
chr5	151252786	151253286
chr5	154445653	154446153
chr5	168579518	168580018
chr5	176416353	176416853
chr5	177426186	177426686
chr5	179698607	179699107
chr5	179732493	179732993
chr6	2245403	2245903
chr6	3118403	3118903
chr6	18155042	18155542
chr6	20401290	20401790
chr6	32195476	32195976
chr6	33322890	33323390
chr6	33391353	33391853
chr6	36593988	36594488
chr6	43170928	43171428
chr6	47309697	47310197
chr6	52995078	52995578
chr6	53359367	53359867
chr6	63572201	63572701
chr6	70413132	70413632
chr6	73520957	73521457
chr6	88963471	88963971
chr6	96924390	96924890
chr6	99515219	99515719
chr6	107958064	107958564
chr6	134174676	134175176
chr6	136289738	136290238
chr6	138773497	138773997
chr6	139134792	139135292
chr6	144216250	144216750
chr6	151452043	151452543
chr6	152982944	152983444
chr7	2631502	2632002
chr7	2844217	2844717
chr7	7968453	7968953
chr7	26864480	26864980
chr7	30134486	30134986
chr7	35800818	35801318
chr7	39949285	39949785
chr7	44986437	44986937
chr7	56051412	56051912
chr7	66075512	66076012
chr7	66628589	66629089
chr7	72828110	72828610
chr7	76317925	76318425
chr7	76359085	76359585
chr7	77122289	77122789
chr7	77798422	77798922
chr7	87345309	87345809
chr7	87933945	87934445
chr7	91264056	91264556
chr7	100148490	100148990
chr7	100538795	100539295
chr7	100586297	100586797
chr7	107168424	107168924
chr7	108569659	108570159
chr7	112206254	112206754
chr7	112939775	112940275
chr7	123534437	123534937
chr7	134646519	134647019
chr7	138459846	138460346
chr7	139340306	139340806
chr7	140696415	140696915
chr7	149028602	149029102
chr7	150378961	150379461
chr7	151519881	151520381
chr8	13133155	13133655
chr8	27311144	27311644
chr8	42152507	42153007
chr8	51898954	51899454
chr8	56993723	56994223
chr8	61714393	61714893
chr8	63168280	63168780
chr8	66428699	66429199
chr8	70401859	70402359
chr8	73008550	73009050
chr8	73878682	73879182
chr8	76672628	76673128
chr8	85220238	85220738
chr8	100721902	100722402
chr8	100951947	100952447
chr8	101205617	101206117
chr8	102239101	102239601
chr8	109539376	109539876
chr8	123174048	123174548
chr8	123274483	123274983
chr8	123768134	123768634
chr8	127736018	127736518
chr9	2014897	2015397
chr9	15422478	15422978
chr9	34989313	34989813
chr9	72365113	72365613
chr9	87725745	87726245
chr9	93095788	93096288
chr9	94165836	94166336
chr9	100098900	100099400
chr9	101398449	101398949
chr9	101533505	101534005
chr9	107282745	107283245
chr9	113275316	113275816
chr9	124861772	124862272
chr9	125143352	125143852
chr9	127245037	127245537
chr9	127451184	127451684
chr9	129028240	129028740
chr9	129178038	129178538
chr9	137459135	137459635
chr10	931514	932014
chr10	1049136	1049636
chr10	3172649	3173149
chr10	5889851	5890351
chr10	12068573	12069073
chr10	31032194	31032694
chr10	68900981	68901481
chr10	70403822	70404322
chr10	73997728	73998228
chr10	98030350	98030850
chr10	99620520	99621020
chr10	101030943	101031443
chr10	102641983	102642483
chr10	102743610	102744110
chr10	102917956	102918456
chr10	103396337	103396837
chr10	110211090	110211590
chr10	114174112	114174612
chr10	118754915	118755415
chr10	119725655	119726155
chr11	535438	535938
chr11	6481143	6481643
chr11	6683261	6683761
chr11	12674099	12674599
chr11	13668217	13668717
chr11	14892042	14892542
chr11	16738287	16738787
chr11	19712432	19712932
chr11	28108043	28108543
chr11	30322835	30323335
chr11	31817766	31818266
chr11	33161327	33161827
chr11	33700696	33701196
chr11	44565188	44565688
chr11	47408113	47408613
chr11	62665021	62665521
chr11	62753967	62754467
chr11	64185744	64186244
chr11	64778567	64779067
chr11	65111565	65112065
chr11	65354412	65354912
chr11	66466556	66467056
chr11	66958261	66958761
chr11	73760987	73761487
chr11	85628179	85628679
chr11	86955224	86955724
chr11	102630714	102631214
chr11	106022114	106022614
chr11	108222564	108223064
chr11	111926789	111927289
chr11	119381503	119382003
chr11	119764310	119764810
chr11	123062330	123062830
chr11	123511085	123511585
chr11	125111560	125112060
chr11	125592369	125592869
chr11	134033939	134034439
chr12	6534122	6534622
chr12	6937866	6938366
chr12	8243335	8243835
chr12	13000131	13000631
chr12	26938148	26938648
chr12	27243954	27244454
chr12	30754808	30755308
chr12	31728952	31729452
chr12	46372595	46373095
chr12	49018589	49019089
chr12	49110661	49111161
chr12	49131211	49131711
chr12	49707369	49707869
chr12	50111718	50112218
chr12	53054282	53054782
chr12	53379676	53380176
chr12	53625834	53626334
chr12	55817533	55818033
chr12	57520369	57520869
chr12	57546985	57547485
chr12	57752211	57752711
chr12	64824341	64824841
chr12	92929230	92929730
chr12	100266844	100267344
chr12	106774035	106774535
chr12	111405560	111406060
chr12	113221019	113221519
chr12	118372759	118373259
chr12	120686681	120687181
chr12	121794097	121794597
chr12	124392925	124393425
chr12	132275058	132275558
chr13	19863460	19863960
chr13	23579034	23579534
chr13	26557335	26557835
chr13	27620400	27620900
chr13	28718821	28719321
chr13	31846401	31846901
chr13	44141795	44142295
chr13	44436618	44437118
chr13	45341180	45341680
chr13	49936197	49936697
chr13	51452892	51453392
chr13	91398322	91398822
chr13	97432945	97433445
chr13	102596615	102597115
chr13	110715335	110715835
chr14	22919186	22919686
chr14	22929246	22929746
chr14	23006943	23007443
chr14	23320918	23321418
chr14	24141428	24141928
chr14	25570409	25570909
chr14	35046011	35046511
chr14	35292097	35292597
chr14	49620488	49620988
chr14	54396612	54397112
chr14	54509504	54510004
chr14	63543264	63543764
chr14	64986912	64987412
chr14	67619515	67620015
chr14	70809548	70810048
chr14	77320748	77321248
chr14	79279027	79279527
chr14	90454276	90454776
chr14	95157325	95157825
chr14	99604128	99604628
chr14	101947876	101948376
chr14	102316792	102317292
chr14	102524506	102525006
chr14	103333897	103334397
chr14	103715402	103715902
chr15	33194533	33195033
chr15	39782323	39782823
chr15	45279065	45279565
chr15	84715948	84716448
chr15	89334677	89335177
chr15	90387907	90388407
chr15	92831691	92832191
chr15	100341888	100342388
chr16	1943133	1943633
chr16	2155292	2155792
chr16	2223202	2223702
chr16	2882482	2882982
chr16	3003836	3004336
chr16	4693259	4693759
chr16	4734138	4734638
chr16	4802718	4803218
chr16	5097948	5098448
chr16	9091251	9091751
chr16	11742694	11743194
chr16	19555298	19555798
chr16	22190733	22191233
chr16	27549803	27550303
chr16	30065400	30065900
chr16	30370506	30371006
chr16	30657956	30658456
chr16	54929031	54929531
chr16	57300461	57300961
chr16	57735382	57735882
chr16	67247320	67247820
chr16	67806412	67806912
chr16	68448339	68448839
chr16	77722194	77722694
chr16	89247303	89247803
chr17	7014484	7014984
chr17	7931823	7932323
chr17	15999504	16000004
chr17	17972331	17972831
chr17	28335434	28335934
chr17	41786616	41787116
chr17	44186549	44187049
chr17	45161624	45162124
chr17	47970674	47971174
chr17	48047895	48048395
chr17	63621882	63622382
chr17	74872824	74873324
chr17	77958276	77958776
chr17	81222859	81223359
chr18	9913660	9914160
chr18	32092201	32092701
chr18	50287683	50288183
chr18	50878794	50879294
chr18	57435055	57435555
chr18	59139214	59139714
chr18	62186872	62187372
chr18	63367333	63367833
chr18	63422271	63422771
chr18	80033969	80034469
chr19	680270	680770
chr19	1103698	1104198
chr19	2096539	2097039
chr19	4402186	4402686
chr19	4791330	4791830
chr19	4968715	4969215
chr19	5904364	5904864
chr19	6424742	6425242
chr19	7943636	7944136
chr19	10835574	10836074
chr19	13747490	13747990
chr19	14117610	14118110
chr19	14136662	14137162
chr19	14529221	14529721
chr19	17859526	17860026
chr19	19063358	19063858
chr19	19776277	19776777
chr19	32675037	32675537
chr19	35702270	35702770
chr19	35740428	35740928
chr19	38849882	38850382
chr19	39342011	39342511
chr19	39390924	39391424
chr19	40425801	40426301
chr19	40465658	40466158
chr19	42075659	42076159
chr19	42325265	42325765
chr19	43668464	43668964
chr19	45792680	45793180
chr19	47256968	47257468
chr19	48468929	48469429
chr19	48493217	48493717
chr19	48619144	48619644
chr19	48714124	48714624
chr19	49640092	49640592
chr19	49641745	49642245
chr19	49676695	49677195
chr19	49766383	49766883
chr19	49877366	49877866
chr19	50329028	50329528
chr19	50511131	50511631
chr19	55339206	55339706
chr20	3767693	3768193
chr20	5166658	5167158
chr20	23358019	23358519
chr20	34558355	34558855
chr20	35742110	35742610
chr20	50510029	50510529
chr20	50730970	50731470
chr21	29073541	29074041
chr21	37267380	37267880
chr21	40841875	40842375
chr22	20020757	20021257
chr22	21641907	21642407
chr22	29603246	29603746
chr22	35299898	35300398
chr22	36776171	36776671
chr1	2133041	2133541
chr1	2227573	2228073
chr1	2391426	2391926
chr1	16644468	16644968
chr1	25430531	25431031
chr1	26233832	26234332
chr1	26864924	26865424
chr1	26921376	26921876
chr1	27568293	27568793
chr1	28581695	28582195
chr1	35557462	35557962
chr1	36224115	36224615
chr1	47314009	47314509
chr1	53945735	53946235
chr1	66924709	66925209
chr1	86396087	86396587
chr1	88992701	88993201
chr1	92298753	92299253
chr1	110339020	110339520
chr1	110963814	110964314
chr1	144551956	144552456
chr1	155244461	155244961
chr1	155277088	155277588
chr1	161225539	161226039
chr1	167721619	167722119
chr1	167936330	167936830
chr1	179882363	179882863
chr1	179954449	179954949
chr1	180926508	180927008
chr1	185317125	185317625
chr1	202341806	202342306
chr1	202348300	202348800
chr1	205227621	205228121
chr1	207053008	207053508
chr1	212608252	212608752
[truncated: 236,911+ more rows]

[truncated: 2 more sheets: Rod peakSet, MPRA result]
