# Supplementary material for: Integrated multi-omics single cell atlas of the human retina
Source: Research Square preprint supplement (doi:10.21203/rs.3.rs-3471275/v1), 2023-11-16
Supplement: Supplementary file 11 [file 7107666bf2566016800b5ad7.xlsx]

## Sheet: Rod aging DEG
Table S15. Results of differential gene expression analysis during aging by LMM
	logFC	AveExpr	t	P.Value	adj.P.Val	B	z.std	qval
STAM	-0.217664	5.20632	-8.39177	1.55443e-13	2.79844e-09	20.3786	-7.38242	1.52657e-09
PCARE	-0.521981	5.5441	-7.17954	1.0362e-10	9.32739e-07	13.9638	-6.46157	5.08816e-07
FKBP5	-0.525871	6.75457	-6.91915	2.89841e-10	1.51812e-06	12.9895	-6.30412	8.28145e-07
YOD1	-0.531842	3.41834	-6.89876	3.37304e-10	1.51812e-06	12.238	-6.28058	8.28145e-07
AC016229.1	-1.34813	0.579804	-6.61008	1.32327e-09	4.76458e-06	11.5985	-6.06455	2.59911e-06
AC008403.3	0.869075	0.52138	6.51983	2.27802e-09	6.83521e-06	9.0935	5.97663	3.72866e-06
LINC00472	-0.420125	4.38636	-6.34946	4.6588e-09	1.19818e-05	10.3775	-5.85892	6.53613e-06
STAM2	-0.17387	5.45368	-6.25447	7.33104e-09	1.64976e-05	9.89635	-5.78316	8.99955e-06
PEX13	-0.219348	4.45579	-6.21575	8.8117e-09	1.659e-05	9.76231	-5.75215	9.04994e-06
BFAR	-0.293501	4.78297	-6.20827	9.71744e-09	1.659e-05	9.55139	-5.73559	9.04994e-06
SLC25A40	-0.192294	4.8542	-6.18619	1.01366e-08	1.659e-05	9.61233	-5.72843	9.04994e-06
ZNF432	-0.312769	5.65168	-6.15474	1.23545e-08	1.85349e-05	9.37713	-5.69476	1.01109e-05
TDP2	-0.155818	4.1903	-6.05552	1.87608e-08	2.57992e-05	9.05366	-5.62306	1.40736e-05
BCKDHB	-0.278195	6.42836	-6.0412	2.00627e-08	2.57992e-05	8.8799	-5.61146	1.40736e-05
AL589935.1	-0.492083	1.71432	-5.97262	2.76376e-08	3.31613e-05	8.75086	-5.55578	1.80897e-05
HIPK1	-0.280571	6.26877	-6.08581	2.94718e-08	3.31613e-05	9.11962	-5.54455	1.80897e-05
USP53	-0.215068	5.58754	-5.94067	3.20675e-08	3.39595e-05	8.46494	-5.52976	1.85251e-05
RBM12B	-0.291324	4.90283	-5.84455	5.68897e-08	5.68992e-05	8.02652	-5.42831	3.10389e-05
PURB	-0.458412	5.24249	-5.81884	6.35319e-08	5.9867e-05	7.93535	-5.40856	3.26579e-05
BRD3	-0.2322	5.13283	-5.78269	6.65078e-08	5.9867e-05	7.76321	-5.40036	3.26579e-05
GSKIP	-0.262273	6.58475	-5.71389	1.05182e-07	9.0171e-05	7.52424	-5.31754	4.91889e-05
ZNF658	-0.369215	2.98104	-5.74373	1.11765e-07	9.14592e-05	7.38168	-5.30648	4.98916e-05
RCHY1	-0.212789	4.8969	-5.6511	1.21172e-07	9.48463e-05	7.21269	-5.29172	5.17393e-05
CHIC2	-0.168249	5.14746	-5.62819	1.34422e-07	0.000100833	7.10173	-5.27271	5.50052e-05
PCAT4	0.784531	6.64993	5.61656	1.41685e-07	0.00010203	7.0405	5.26305	5.56581e-05
WBP2NL	0.175938	6.48162	5.55774	1.84697e-07	0.000120525	6.74803	5.21411	6.57473e-05
DNAH17-AS1	1.21976	-0.606182	5.55121	1.90204e-07	0.000120525	6.24593	5.20867	6.57473e-05
SYNJ2BP	-0.242062	5.85494	-5.55057	1.919e-07	0.000120525	6.82816	-5.20702	6.57473e-05
MAPK3	-0.368613	4.15307	-5.54525	1.95556e-07	0.000120525	6.70746	-5.20351	6.57473e-05
USP2-AS1	-0.645751	3.86806	-5.54542	2.00842e-07	0.000120525	6.68185	-5.19856	6.57473e-05
AC013267.2	0.551068	0.698286	5.48916	2.51149e-07	0.000143697	6.50946	5.15684	7.83876e-05
ZNF518B	-0.401544	3.29645	-5.63921	2.55419e-07	0.000143697	7.05317	-5.15368	7.83876e-05
ZNF614	-0.318801	2.87726	-5.85631	2.92709e-07	0.000159686	7.90499	-5.12808	8.71098e-05
OARD1	-0.26765	5.35133	-5.44285	3.09666e-07	0.000160298	6.37187	-5.11747	8.74438e-05
FBXO30	-0.43624	3.32503	-6.16007	3.11639e-07	0.000160298	9.33261	-5.11627	8.74438e-05
AP000224.1	-0.448217	0.425361	-5.42576	3.33075e-07	0.000166565	6.35885	-5.1037	9.08624e-05
ECI2	-0.241041	5.85719	-5.42968	3.4548e-07	0.000168099	6.3353	-5.09678	9.16993e-05
MRPS30	-0.401868	4.29712	-5.38029	4.45524e-07	0.000208998	6.08348	-5.0484	0.00011401
EBLN3P	-0.317718	4.38662	-5.36758	4.52754e-07	0.000208998	6.04055	-5.04532	0.00011401
R3HCC1	-0.3094	5.66881	-5.29565	6.11926e-07	0.000270216	5.79148	-4.98741	0.000147405
SLC26A2	-0.414926	6.39632	-5.30966	6.1539e-07	0.000270216	5.85124	-4.98632	0.000147405
FASTKD1	-0.182524	6.48895	-5.27258	6.541e-07	0.000280375	5.51085	-4.97452	0.000152947
TTC30A	-0.503264	3.07604	-5.24243	7.77164e-07	0.000324246	5.38669	-4.94102	0.000176879
SOCS4	-0.352162	4.485	-5.3506	7.9247e-07	0.000324246	6.00077	-4.93721	0.000176879
AC015853.3	0.42086	4.28499	5.28946	8.27006e-07	0.000330857	5.72624	4.92888	0.000180485
PTPN13	-0.299921	10.4573	-5.35274	9.30513e-07	0.000364174	5.98649	-4.90579	0.00019866
NHLRC2	-0.186418	6.23316	-6.26608	1.20074e-06	0.000451984	9.96383	-4.85552	0.00024656
GOPC	-0.0906673	5.42878	-5.13178	1.20509e-06	0.000451984	4.97689	-4.8548	0.00024656
FAM138C	1.00008	2.61724	5.1199	1.26829e-06	0.000465979	5.16007	4.84466	0.000254195
PITRM1-AS1	0.391935	3.83142	5.15061	1.32772e-06	0.000467275	5.15931	4.83556	0.000254902
SREK1IP1	-0.273193	5.26602	-5.13501	1.37072e-06	0.000467275	5.15136	-4.82922	0.000254902
MIR7-3HG	0.537652	2.76136	5.12991	1.37276e-06	0.000467275	4.88895	4.82892	0.000254902
EXOC8	-0.435828	2.78241	-5.30829	1.37564e-06	0.000467275	5.66921	-4.8285	0.000254902
ZNF134	-0.323283	3.23336	-5.14372	1.49404e-06	0.000494915	5.06741	-4.81203	0.000269979
RBM27	-0.0903971	6.22738	-5.07742	1.52194e-06	0.000494915	4.71534	-4.80833	0.000269979
PPP4R2	-0.125757	6.13619	-5.07474	1.53948e-06	0.000494915	4.70547	-4.80604	0.000269979
ARL4D	-0.846477	6.39709	-5.23125	1.93621e-06	0.000611538	5.5296	-4.75997	0.000333598
SNX16	-0.189913	3.26771	-5.00354	2.08549e-06	0.000646405	4.6115	-4.74496	0.000352618
ECT2	-0.249144	5.28262	-4.99985	2.11842e-06	0.000646405	4.433	-4.74179	0.000352618
RNF144A	-0.408801	8.50498	-5.18395	2.21354e-06	0.000664172	5.31694	-4.73288	0.00036231
KRR1	-0.244357	5.15183	-5.0066	2.31439e-06	0.000683048	4.64805	-4.72383	0.000372607
AC005899.8	0.422143	4.12808	4.97141	2.38965e-06	0.000688553	4.46998	4.71733	0.00037561
ZNF264	-0.22187	4.42611	-5.05113	2.40953e-06	0.000688553	4.81273	-4.71564	0.00037561
PEX5	-0.183313	3.80408	-4.95783	2.53091e-06	0.000711938	4.36517	-4.70562	0.000388367
SHOC2	-0.183684	6.31162	-5.74738	2.67688e-06	0.000741414	7.66863	-4.69417	0.000404446
PURA	-0.230021	6.39374	-4.9792	2.85768e-06	0.000778592	4.53674	-4.68079	0.000424727
BAG3	1.10322	0.154695	4.9274	2.89761e-06	0.000778592	3.2319	4.67795	0.000424727
LINC00866	-0.728338	2.56021	-5.00221	3.06101e-06	0.000804559	4.47916	-4.66668	0.000438892
EPX	0.421799	1.49497	4.91093	3.08363e-06	0.000804559	4.32588	4.66517	0.000438892
AC003035.2	0.550867	1.93252	4.89084	3.35487e-06	0.000855102	4.25449	4.6478	0.000466464
TEX9	-0.246189	7.36214	-5.10531	3.37234e-06	0.000855102	5.00715	-4.64673	0.000466464
AP001267.3	0.41961	3.6203	5.20094	3.87879e-06	0.000959646	5.35955	4.61777	0.000523493
WDR41	-0.141714	5.82573	-4.85334	3.92442e-06	0.000959646	3.82056	-4.61535	0.000523493
CBLL1	-0.155847	4.45749	-4.85158	3.95325e-06	0.000959646	3.89778	-4.61383	0.000523493
AC017104.6	-0.486317	0.52366	-4.84805	4.01185e-06	0.000959646	4.08564	-4.61077	0.000523493
AC021755.2	0.532473	0.0997175	4.84283	4.10026e-06	0.000959646	3.92804	4.60623	0.000523493
PROSER1	-0.152036	3.88641	-4.84258	4.10447e-06	0.000959646	3.90741	-4.60602	0.000523493
MED31	-0.287356	4.43996	-4.82155	4.48682e-06	0.00103335	3.92514	-4.58746	0.0005637
ELSPBP1	-0.789987	6.23435	-4.82992	4.53451e-06	0.00103335	3.96643	-4.58525	0.0005637
NFKBIA	-0.559989	3.43847	-4.84994	4.63456e-06	0.00104295	3.98747	-4.58068	0.000568936
PDE4DIP	-0.211067	7.65865	-6.55348	4.77622e-06	0.00105915	11.2254	-4.57438	0.000577776
DNAJB14	-0.168644	6.86283	-5.06602	4.82951e-06	0.00105915	4.85809	-4.57206	0.000577776
NCOA5	-0.226034	5.73746	-6.36914	4.88306e-06	0.00105915	10.4388	-4.56975	0.000577776
HEATR4	0.295682	3.29527	4.78697	5.17064e-06	0.00109547	3.79622	4.55774	0.000597587
MLEC	-0.135042	4.97925	-4.78689	5.1722e-06	0.00109547	3.60723	-4.55768	0.000597587
CNOT8	-0.168761	4.18152	-4.77215	5.49732e-06	0.00115079	3.61004	-4.54485	0.000627765
HSPA6	1.69093	-1.41155	4.76049	5.77157e-06	0.00119432	2.80972	4.53459	0.000651508
LRRN3	0.545024	3.63542	4.77093	5.9432e-06	0.00120701	3.70762	4.5284	0.000658434
TMEM42	0.263776	3.06875	4.75228	5.96702e-06	0.00120701	3.67127	4.52755	0.000658434
SPDYE16	0.413764	3.7536	4.84814	6.44268e-06	0.00126308	4.01639	4.51132	0.000689016
ZNF555	-0.255078	3.41288	-4.75439	6.46362e-06	0.00126308	3.62811	-4.51063	0.000689016
AC023136.1	0.69004	3.96129	4.74514	6.51629e-06	0.00126308	3.62737	4.50891	0.000689016
CELA2B	0.351618	2.54933	4.72808	6.5915e-06	0.00126308	3.62244	4.50647	0.000689016
EMC2	-0.293133	6.26476	-4.9034	6.6356e-06	0.00126308	4.23719	-4.50505	0.000689016
NBPF9	-0.198279	4.69901	-4.72304	6.72953e-06	0.00126308	3.36685	-4.50207	0.000689016
ESYT1	0.294061	3.28915	4.72283	6.73528e-06	0.00126308	3.53956	4.50189	0.000689016
FOXO6	-0.484765	-0.157416	-4.71975	6.82097e-06	0.00126596	3.55279	-4.4992	0.000690588
PALLD	0.567364	3.60772	4.92803	6.99486e-06	0.00128499	4.31841	4.49384	0.000700968
ZBTB18	-0.367763	4.78795	-4.84006	7.12547e-06	0.00128605	4.01137	-4.48991	0.000701551
ZNF688	-0.350291	3.07473	-4.71092	7.14355e-06	0.00128605	3.40929	-4.48937	0.000701551
PRICKLE2	0.671098	3.38045	4.74917	7.51266e-06	0.00133564	3.61739	4.47862	0.000728599
TTC33	-0.183588	5.83689	-6.10493	7.56735e-06	0.00133564	9.2396	-4.47707	0.000728599
SLAIN2	-0.233635	7.46701	-5.65912	7.83818e-06	0.00137001	7.23546	-4.46956	0.000747348
SMC3	-0.220203	6.55754	-4.78554	8.32311e-06	0.00144078	3.77626	-4.4567	0.000785954
GLOD5	0.295502	3.00802	4.66847	8.41278e-06	0.00144243	3.36947	4.4544	0.000786856
TMEM191C	0.47979	0.590951	4.66217	8.63165e-06	0.001466	3.3291	4.44889	0.000799711
FBXO7	-0.27002	5.34417	-5.07573	8.78426e-06	0.00147797	4.91994	-4.44512	0.000806244
C3orf38	-0.220506	4.96401	-4.65407	8.98836e-06	0.00148676	3.31233	-4.44018	0.000811038
TOMM40L	-0.384372	2.2746	-4.7059	9.07088e-06	0.00148676	3.32309	-4.43821	0.000811038
MITF	-0.411923	2.07933	-4.64961	9.08425e-06	0.00148676	3.29206	-4.4379	0.000811038
ZNF595	-0.209834	3.95028	-4.9505	9.49937e-06	0.0015407	4.43755	-4.42827	0.00084046
RAB39B	-0.344965	2.46251	-4.63792	1.01748e-05	0.00163081	3.08446	-4.41343	0.000889618
VPS35L	0.268318	6.49991	4.68596	1.03139e-05	0.00163081	3.4098	4.41049	0.000889618
GABPB2	0.331031	5.18865	4.65443	1.03267e-05	0.00163081	3.31332	4.41022	0.000889618
AL157938.3	0.448399	4.02595	4.99169	1.08036e-05	0.00169128	4.60066	4.40043	0.000922605
QKI	-0.164369	6.70397	-4.59655	1.12639e-05	0.00174778	2.77315	-4.39137	0.000953425
PBDC1	-0.544137	3.42646	-4.63979	1.13587e-05	0.00174778	3.23032	-4.38955	0.000953425
ZNF800	-0.278841	5.43414	-4.92234	1.16431e-05	0.00177636	4.31828	-4.38417	0.000969017
LSM8	-0.208836	5.07522	-4.58389	1.18679e-05	0.00177823	3.05495	-4.38	0.000970035
ASAP2	-0.343262	3.5407	-4.58224	1.19334e-05	0.00177823	2.90941	-4.3788	0.000970035
AIMP1	-0.21527	5.3902	-4.60227	1.19516e-05	0.00177823	3.11729	-4.37847	0.000970035
LINC00608	0.434235	-0.129478	4.57733	1.21719e-05	0.00178433	2.98061	4.37449	0.000973363
MAN1B1-DT	0.422055	1.17812	4.57694	1.21909e-05	0.00178433	3.05954	4.37415	0.000973363
AC023906.4	0.50799	5.82703	4.7728	1.23097e-05	0.0017872	3.74785	4.37203	0.000974927
PDCD10	-0.11087	5.16416	-4.5709	1.24912e-05	0.00179903	2.7532	-4.36883	0.000981384
SLC34A1	0.532451	2.64262	4.69045	1.3019e-05	0.0018348	3.34721	4.35979	0.00100089
COG2	-0.142855	5.2713	-4.56033	1.30335e-05	0.0018348	2.70481	-4.35954	0.00100089
SLC1A5	0.660495	0.0449327	4.56011	1.30453e-05	0.0018348	2.88053	4.35934	0.00100089
MAN1A2	-0.215419	6.73072	-4.82799	1.39274e-05	0.00194368	3.90914	-4.345	0.00106029
LINC02069	0.53337	-0.11976	4.52881	1.47899e-05	0.00204817	2.76394	4.33179	0.00111729
PPP1R15B	-0.376551	3.42934	-4.87278	1.52584e-05	0.00207988	4.11649	-4.32492	0.00113459
LINC00863	-0.228137	3.12278	-4.52053	1.52882e-05	0.00207988	2.73126	-4.32449	0.00113459
AC009107.2	0.387434	3.26312	4.78323	1.53655e-05	0.00207988	3.78231	4.32338	0.00113459
ZNF24	-0.325527	5.68879	-4.56786	1.60218e-05	0.00215254	2.98125	-4.31415	0.00117423
ZDHHC20	-0.209258	6.45842	-5.28311	1.62691e-05	0.00216957	5.7056	-4.31076	0.00118352
TRAF6	-0.242824	3.74313	-5.79466	1.66537e-05	0.00220453	7.90425	-4.3056	0.00120259
WDR36	-0.173244	4.17275	-4.49616	1.68494e-05	0.00221416	2.54391	-4.30301	0.00120784
ZFR	-0.138937	6.85786	-4.49357	1.70328e-05	0.00222204	2.70285	-4.30061	0.00121214
USP12	-0.151916	6.37439	-5.60601	1.72414e-05	0.00222694	7.00279	-4.29791	0.00121481
AC107419.1	0.659349	2.7217	5.03778	1.73837e-05	0.00222694	4.81338	4.29609	0.00121481
FGF2	0.851454	2.03913	4.9488	1.74415e-05	0.00222694	4.29877	4.29535	0.00121481
SLC49A4	-0.338193	5.63694	-4.65364	1.78055e-05	0.00225741	3.29513	-4.29077	0.00123143
AC093297.2	-0.505952	2.47991	-4.5382	1.83583e-05	0.00230981	2.79263	-4.28398	0.00126002
ENTPD3	0.539363	3.10484	4.7999	1.84754e-05	0.00230981	3.82372	4.28256	0.00126002
GOLGA7B	-0.665212	4.47079	-4.62068	1.93383e-05	0.00240102	3.19187	-4.2724	0.00130977
AC104781.2	0.433222	5.46386	4.60797	1.99786e-05	0.00246353	3.13366	4.26513	0.00134387
ZNF780A	-0.273398	3.92251	-4.70097	2.02469e-05	0.00247962	3.48787	-4.26215	0.00135265
DR1	-0.242657	4.09989	-4.54641	2.05867e-05	0.00249066	2.9209	-4.25843	0.00135867
DERA	-0.180537	7.10982	-4.44538	2.06137e-05	0.00249066	2.17709	-4.25814	0.00135867
LRRC4B	0.718932	0.576947	4.95425	2.13878e-05	0.00256696	4.14907	4.24989	0.00140029
SLC22A4	0.584093	3.69206	4.43748	2.16165e-05	0.00257535	2.51159	4.2475	0.00140487
A2M	0.965479	5.48106	4.50886	2.18853e-05	0.00257535	2.77569	4.24473	0.00140487
PIRT	0.476459	2.03372	4.42937	2.19603e-05	0.00257535	2.5321	4.24397	0.00140487
TMEM216	-0.389095	2.69223	-4.70476	2.20299e-05	0.00257535	3.43072	-4.24326	0.00140487
TMEM170B	-0.134711	4.67737	-4.4267	2.21926e-05	0.00257763	2.2429	-4.24161	0.00140611
AC011509.2	0.461487	1.29232	4.4238	2.24485e-05	0.00259065	2.51724	4.23903	0.00141321
COG6	-0.208522	5.92236	-5.79479	2.27563e-05	0.00260944	7.8435	-4.23597	0.00142347
AK4	0.965082	4.12885	4.41493	2.32466e-05	0.00264879	2.36199	4.23118	0.00144493
CYB561A3	-0.290645	4.82231	-4.41646	2.35189e-05	0.00266296	2.45268	-4.22856	0.00145266
TOPBP1	-0.103688	4.55706	-4.40474	2.41988e-05	0.00272282	2.16727	-4.22215	0.00148532
ZNF787	-0.230246	5.1714	-4.4229	2.4434e-05	0.00273221	2.47016	-4.21997	0.00149044
TDRP	-0.195345	6.04445	-4.55424	2.54108e-05	0.00282389	2.91318	-4.21112	0.00154045
GALNT1	-0.187136	6.13283	-5.06328	2.58334e-05	0.00283817	4.82461	-4.20739	0.00154824
AC020915.2	0.307994	3.8474	4.48402	2.60159e-05	0.00283817	2.69573	4.2058	0.00154824
AC090559.1	0.403127	0.719387	4.38566	2.60826e-05	0.00283817	2.36445	4.20522	0.00154824
KLF15	-0.30487	1.72112	-4.3848	2.61699e-05	0.00283817	2.34808	-4.20447	0.00154824
AC008537.4	0.456695	1.76521	4.68325	2.64414e-05	0.00285045	3.2669	4.20213	0.00155494
LCA5	-0.174568	6.17391	-5.096	2.71006e-05	0.00289233	4.92615	-4.19656	0.00157779
SKP2	-0.226932	3.67439	-5.19982	2.73415e-05	0.00289233	5.43541	-4.19455	0.00157779
SUSD3	-0.889353	3.04857	-5.01699	2.73845e-05	0.00289233	4.65244	-4.19419	0.00157779
GOSR2	-0.246132	5.68748	-4.37754	2.74726e-05	0.00289233	2.30298	-4.19346	0.00157779
SCN1B	1.10531	1.70156	4.66657	2.79998e-05	0.0029307	3.24842	4.18915	0.00159871
TRIM13	0.305646	6.93288	4.62723	2.83494e-05	0.00294	3.16229	4.18634	0.00160379
RGS2	0.979249	1.88062	4.56044	2.87023e-05	0.00294	2.80833	4.18353	0.00160379
SMAD4	-0.181094	6.41995	-4.68714	2.87936e-05	0.00294	3.39804	-4.1828	0.00160379
NRIP3	0.775511	2.59013	4.54722	2.88763e-05	0.00294	2.86409	4.18215	0.00160379
ZNF853	-0.394796	2.03493	-4.39889	2.89052e-05	0.00294	2.2279	-4.18192	0.00160379
AC022150.4	-0.515627	1.37043	-4.41131	2.9436e-05	0.00296291	2.14358	-4.17779	0.00161629
IL7	0.61162	4.81269	4.35565	2.94595e-05	0.00296291	2.23845	4.1776	0.00161629
OLA1	-0.121703	7.27656	-4.34907	3.00977e-05	0.00301027	1.81397	-4.17273	0.00164212
AC091885.2	1.99849	-0.564801	4.54908	3.04472e-05	0.0030284	2.2481	4.1701	0.00165202
AC128707.1	0.535763	7.95828	4.35029	3.11958e-05	0.00308581	2.16326	4.16456	0.00168333
SCRN1	-0.231096	6.12201	-4.36339	3.13924e-05	0.00308829	2.23858	-4.16312	0.00168468
AF111167.2	-0.417205	3.04176	-4.35717	3.16575e-05	0.00309745	2.2033	-4.1612	0.00168968
ZNF71	-0.267838	2.79596	-4.4502	3.21852e-05	0.00311121	2.52744	-4.15743	0.00169718
FNBP1L	-0.16103	5.4207	-4.33133	3.22521e-05	0.00311121	1.83129	-4.15695	0.00169718
TMEM167B	-0.335382	3.68074	-4.3677	3.23166e-05	0.00311121	2.2775	-4.1565	0.00169718
KBTBD7	-0.373666	3.14726	-4.32614	3.29275e-05	0.00314866	2.08756	-4.15221	0.00171761
ZNF782	-0.255302	6.15029	-4.47953	3.30554e-05	0.00314866	2.63536	-4.15133	0.00171761
PM20D1	0.920713	2.42155	4.45006	3.40812e-05	0.00322928	2.48851	4.14433	0.00176159
PDLIM1	-0.32035	5.56556	-4.75624	3.44201e-05	0.00324432	3.66822	-4.14206	0.0017698
P4HA3	0.421448	4.75956	4.42185	3.49821e-05	0.00328012	2.46939	4.13834	0.00178933
CYP3A7	0.579687	1.46195	4.30953	3.5364e-05	0.00329875	1.78949	4.13585	0.00179949
AMOTL2	-0.41179	2.61268	-4.33402	3.59009e-05	0.00331018	2.09562	-4.13239	0.00180573
WASF3	-0.118056	7.55492	-4.30317	3.598e-05	0.00331018	1.63347	-4.13189	0.00180573
ZBTB44	-0.158887	6.23993	-5.11058	3.60382e-05	0.00331018	4.99201	-4.13151	0.00180573
TBC1D25	0.161723	4.10728	4.2995	3.64963e-05	0.00333524	1.86636	4.12861	0.0018194
KIZ-AS1	0.473136	4.756	4.3085	3.73346e-05	0.00338581	2.07288	4.12338	0.00184698
GRPEL2-AS1	0.301658	4.7383	4.36767	3.74257e-05	0.00338581	2.27678	4.12282	0.00184698
USP2	-0.224708	7.34551	-4.30446	3.78829e-05	0.00341003	1.99781	-4.12003	0.00186019
ATF4	-0.405648	6.194	-4.32241	3.84488e-05	0.00344375	2.07737	-4.11661	0.00187859
AL031587.2	0.486069	2.79783	4.44352	3.92687e-05	0.00349977	2.51882	4.11174	0.00190915
AC087457.1	-0.372334	5.48718	-4.46709	3.99479e-05	0.00352082	2.60641	-4.10778	0.00192063
ETV4	0.368269	2.56009	4.27546	4.00528e-05	0.00352082	1.94413	4.10717	0.00192063
ATP1B3	0.214777	6.09764	4.35209	4.00915e-05	0.00352082	2.18649	4.10695	0.00192063
ITCH-AS1	0.72571	0.676944	5.05333	4.1018e-05	0.0035847	4.43147	4.10167	0.00195548
AC020908.1	0.455932	0.668624	4.59973	4.13811e-05	0.00358966	2.78313	4.09963	0.00195818
RBM4	-0.195363	6.17616	-4.31755	4.16359e-05	0.00358966	2.06232	-4.09821	0.00195818
ACKR4	0.462839	2.41807	4.26548	4.16729e-05	0.00358966	1.82778	4.098	0.00195818
XPOT	-0.0993353	5.19435	-4.26314	4.20022e-05	0.00360079	1.60298	-4.09618	0.00196425
SEC24B-AS1	0.199133	1.72568	4.25634	4.31169e-05	0.00367256	1.91599	4.09011	0.00200341
AL138787.2	0.407422	4.02878	4.46435	4.32474e-05	0.00367256	2.62862	4.08941	0.00200341
KIAA1614	-0.264792	6.8582	-4.2882	4.39497e-05	0.00371468	1.94435	-4.08567	0.00202638
AC092040.1	0.781076	0.4792	4.41607	4.49322e-05	0.00376508	2.0435	4.08053	0.00205388
MRPL22	-0.207886	4.4777	-4.3547	4.49643e-05	0.00376508	2.2318	-4.08037	0.00205388
TULP1	-0.187677	8.5267	-4.26579	4.64733e-05	0.00383708	1.82644	-4.07269	0.00209315
NAA25	-0.323379	7.21645	-4.96196	4.67219e-05	0.00383708	4.42597	-4.07145	0.00209315
ZNF510	-0.210334	3.8757	-4.72955	4.68704e-05	0.00383708	3.60173	-4.07071	0.00209315
C5orf51	-0.208212	3.9829	-4.64975	4.69025e-05	0.00383708	3.30276	-4.07055	0.00209315
XRCC1	0.199492	4.49238	4.24693	4.69351e-05	0.00383708	1.86226	4.07039	0.00209315
GLB1L3	0.845263	2.1149	4.81109	4.7103e-05	0.00383708	3.87882	4.06956	0.00209315
AC087501.1	0.525793	2.0341	4.30685	4.78626e-05	0.00386541	1.9453	4.06583	0.00210861
AL157871.4	0.373305	4.17982	4.29911	4.81955e-05	0.00386541	2.04473	4.06421	0.00210861
PRPF38B	-0.256301	5.24651	-4.51929	4.8647e-05	0.00386541	2.79396	-4.06203	0.00210861
SRSF10	-0.206988	7.46265	-4.24652	4.87527e-05	0.00386541	1.78283	-4.06153	0.00210861
2023-03-07	-0.136854	6.65109	-4.76069	4.87543e-05	0.00386541	3.62058	-4.06152	0.00210861
BET1	-0.246558	4.51865	-4.31249	4.87969e-05	0.00386541	2.08396	-4.06132	0.00210861
ALG10	-0.328652	2.38969	-4.30936	4.91311e-05	0.00386541	2.00351	-4.05972	0.00210861
YTHDC1	-0.181648	7.02933	-4.57027	4.91684e-05	0.00386541	2.90102	-4.05955	0.00210861
AC093425.1	0.797511	-0.0390397	4.28739	4.98292e-05	0.00387895	1.37371	4.05643	0.002116
HIST1H2BC	1.11247	0.979115	4.28109	4.99765e-05	0.00387895	1.66643	4.05574	0.002116
DMXL2	-0.196516	6.7475	-4.81495	5.00545e-05	0.00387895	3.82217	-4.05537	0.002116
C16orf89	0.4461	1.41413	4.36872	5.02025e-05	0.00387895	2.08591	4.05468	0.002116
AC135893.1	0.56871	0.899973	4.23552	5.08486e-05	0.00391209	1.43104	4.05169	0.00213407
RPRM	0.936053	-0.305367	4.71513	5.14666e-05	0.0039399	3.1398	4.04886	0.00214924
MTBP	0.255943	4.40515	4.30706	5.16479e-05	0.0039399	2.06861	4.04804	0.00214924
MT-ND6	1.06634	2.28863	4.2354	5.27039e-05	0.00398973	1.75951	4.0433	0.00217643
ZNF728	0.621048	-0.113504	4.2029	5.2921e-05	0.00398973	1.67008	4.04234	0.00217643
AC108472.1	0.586586	4.4428	4.20309	5.2966e-05	0.00398973	1.71304	4.04214	0.00217643
RC3H1	-0.206709	7.39099	-4.73805	5.45618e-05	0.00409282	3.47125	-4.03517	0.00223266
C15orf41	-0.169683	7.18058	-4.19249	5.50675e-05	0.00411361	1.24004	-4.03301	0.002244
ZC3H10	-0.258114	2.98099	-4.21336	5.61593e-05	0.00417784	1.71866	-4.02839	0.00227904
CERT1	-0.122146	6.91656	-4.18542	5.65715e-05	0.00419118	1.2285	-4.02667	0.00228632
TDRD6	-0.445726	3.06059	-4.42277	5.78678e-05	0.00426965	2.47708	-4.02134	0.00232912
FYCO1	-0.2178	7.09744	-4.18763	5.84576e-05	0.00429556	1.59975	-4.01895	0.00234326
FANCF	-0.406834	3.14349	-4.19576	5.95152e-05	0.0043555	1.6681	-4.01472	0.00237595
TANK	-0.108139	6.475	-4.1674	6.05841e-05	0.00440949	1.1821	-4.01052	0.00240541
RHOD	0.341925	1.67149	4.16671	6.07429e-05	0.00440949	1.60842	4.00991	0.00240541
GSTA4	0.356899	3.87982	4.89192	6.2866e-05	0.00454129	4.20641	4.00179	0.0024773
IQCH-AS1	0.324322	5.68985	4.17574	6.30629e-05	0.00454129	1.59095	4.00105	0.0024773
CHP1	0.247347	4.72465	4.22756	6.38158e-05	0.00457719	1.78539	3.99824	0.00249689
GRIP2	-0.358251	2.10665	-4.15219	6.41814e-05	0.00458515	1.46145	-3.99689	0.00250123
AC012501.2	1.22615	5.28361	4.964	6.45036e-05	0.00458996	4.4403	3.9957	0.00250385
ZDHHC13	-0.136343	4.56977	-4.14824	6.51492e-05	0.00461764	1.22324	-3.99334	0.00251895
HIST1H2BD	1.05434	2.78768	4.16558	6.62524e-05	0.00467742	1.56695	3.98936	0.00255156
PAPOLA	-0.142438	6.98315	-4.13793	6.77433e-05	0.00474804	1.05321	-3.98408	0.00259009
AL049569.1	0.355252	3.88123	4.40312	6.77801e-05	0.00474804	2.41156	3.98395	0.00259009
AL162231.2	0.3255	1.72893	4.134	6.87555e-05	0.00479769	1.48634	3.98055	0.00261717
SPDYE1	0.415271	4.70905	4.4212	6.90841e-05	0.00480123	2.45687	3.97942	0.0026191
AC105219.4	0.234536	1.52529	4.13176	6.93395e-05	0.00480123	1.48959	3.97854	0.0026191
PKD2	-0.64534	3.31888	-5.46453	6.96648e-05	0.00480527	6.51941	-3.97743	0.00262131
HPD	0.450164	0.952865	5.0793	7.00055e-05	0.00481034	4.77945	3.97627	0.00262407
ZNF768	-0.440393	2.51437	-4.16558	7.04307e-05	0.00482115	1.53232	-3.97483	0.00262997
AC090617.4	0.400716	3.07913	4.57314	7.17493e-05	0.00489281	3.00494	3.97041	0.00266906
WDR93	0.35614	4.57833	4.25274	7.26318e-05	0.00493431	1.87397	3.9675	0.0026917
PIP4K2A	-0.308019	5.91802	-4.65204	7.30323e-05	0.00493862	3.24232	-3.96618	0.00269405
WASL	-0.162057	6.06308	-4.98452	7.32441e-05	0.00493862	4.42719	-3.96549	0.00269405
POU3F1	0.432506	1.20359	4.11092	7.50089e-05	0.00501464	1.43316	3.95981	0.00273552
KITLG	1.22602	1.43336	4.39695	7.50373e-05	0.00501464	2.33954	3.95972	0.00273552
CCDC36	-0.436691	1.84867	-4.11022	7.5207e-05	0.00501464	1.35671	-3.95918	0.00273552
NGDN	-0.162271	4.54789	-4.15987	7.5842e-05	0.00503756	1.55775	-3.95717	0.00274803
FBXO36	0.202007	6.42047	4.11871	7.61105e-05	0.00503756	1.37592	3.95633	0.00274803
KRBA2	-0.398841	6.91931	-4.22245	7.64321e-05	0.00503941	1.69575	-3.95532	0.00274903
ZNF649	-0.259766	3.06476	-4.24389	7.66982e-05	0.00503941	1.84651	-3.95449	0.00274903
CHSY1	-0.202973	4.94353	-4.09947	7.83122e-05	0.00512674	1.01628	-3.94951	0.00279667
ALG10B	-0.362314	3.517	-4.15954	7.86346e-05	0.0051292	1.56739	-3.94852	0.00279801
ZNF350-AS1	-0.185228	4.92086	-4.09669	7.91334e-05	0.0051431	1.01861	-3.94701	0.0028056
ASB8	-0.210769	6.26334	-4.1207	7.99446e-05	0.00517357	1.37668	-3.94457	0.00282222
SETD7	-0.294986	5.11036	-4.23512	8.04453e-05	0.00517357	1.79067	-3.94307	0.00282222
NNT	-0.236578	4.80676	-5.78031	8.04644e-05	0.00517357	7.83308	-3.94301	0.00282222
SPAG4	0.835919	0.921289	4.46503	8.128e-05	0.0051938	2.5263	3.94059	0.00283325
AP000350.6	1.92409	-0.677078	4.16129	8.1356e-05	0.0051938	0.730938	3.94037	0.00283325
AP5M1	-0.201063	5.16711	-4.65241	8.23261e-05	0.00523716	3.28782	-3.93753	0.00285691
AC084724.1	0.421849	3.02306	4.23345	8.32604e-05	0.00527794	1.8125	3.93482	0.00287915
AC007014.1	0.457138	4.75863	4.14003	8.41913e-05	0.00530347	1.48763	3.93214	0.00289308
ATP8A1	-0.24766	7.89999	-5.7395	8.42522e-05	0.00530347	7.49448	-3.93197	0.00289308
AMER2	-0.331574	5.48124	-4.07659	8.55499e-05	0.00536639	1.26642	-3.9283	0.0029274
GDAP1	-0.225678	7.03702	-4.07479	8.59052e-05	0.00536997	0.822265	-3.9273	0.00292936
TAB2	-0.165197	5.9393	-4.41556	8.74226e-05	0.00544591	2.35981	-3.92308	0.00297078
YAF2	-0.179784	7.82755	-4.55171	8.88263e-05	0.00551427	2.80863	-3.91925	0.00300807
PLET1	0.387828	3.85751	4.88884	8.96306e-05	0.00554508	4.20348	3.91707	0.00302488
CDH10	1.42016	1.48209	4.39569	9.0657e-05	0.00558938	2.28584	3.91433	0.00304904
ROCK2	-0.136929	7.24642	-4.58698	9.1992e-05	0.00565233	2.8946	-3.9108	0.00308338
C2orf69	-0.278645	4.13179	-4.10961	9.27971e-05	0.00567259	1.39581	-3.90869	0.00309444
AF111167.1	0.927426	-0.646603	4.22249	9.34162e-05	0.00567259	0.987917	3.90709	0.00309444
CHRNA3	0.877886	2.44014	4.70204	9.3512e-05	0.00567259	3.52732	3.90684	0.00309444
ATP13A2	0.281593	4.62105	4.42551	9.38484e-05	0.00567259	2.4664	3.90597	0.00309444
DICER1	-0.14566	7.22152	-4.38618	9.41687e-05	0.00567259	2.20934	-3.90515	0.00309444
PARP12	-0.401405	1.97248	-4.05009	9.42124e-05	0.00567259	1.13008	-3.90503	0.00309444
OTUD7B	-0.155106	7.14457	-4.06007	9.47482e-05	0.00568584	1.15354	-3.90366	0.00310166
MEX3A	-0.51061	0.353162	-4.13101	9.55902e-05	0.00571731	1.02798	-3.90152	0.00311883
KIFAP3	-0.15567	7.14515	-4.59853	9.66848e-05	0.00576363	2.95116	-3.89876	0.0031441
NR2F6	-0.305782	4.12745	-4.04629	9.75941e-05	0.00577411	1.18789	-3.8965	0.00314982
AC025871.1	0.383286	3.94712	4.50811	9.78855e-05	0.00577411	2.78356	3.89577	0.00314982
AC122129.1	0.404116	1.30753	4.75421	9.79517e-05	0.00577411	3.61399	3.89561	0.00314982
PDCL	-0.254771	4.72585	-4.03937	9.82743e-05	0.00577411	1.1565	-3.89481	0.00314982
LINC00205	-0.29622	3.9962	-4.10934	9.84643e-05	0.00577411	1.39483	-3.89435	0.00314982
LINC00378	-0.291559	1.31287	-4.03451	9.9838e-05	0.00582514	1.14097	-3.89099	0.00317766
PHF5A	-0.295261	3.43004	-4.07039	9.99817e-05	0.00582514	1.26821	-3.89064	0.00317766
ME2	-0.208231	7.76016	-4.574	0.000100598	0.00584213	2.80587	-3.88915	0.00318692
KLHL23	-0.194335	6.17269	-4.10275	0.000101262	0.00585914	1.30727	-3.88755	0.0031962
FMR1	-0.167215	4.70227	-4.46983	0.000101541	0.00585914	2.59434	-3.88688	0.0031962
AC087392.1	0.595709	0.288316	4.14115	0.000102619	0.00590239	1.14149	3.88431	0.00321979
MIOS	-0.179817	5.38594	-4.43702	0.000103986	0.00596199	2.43513	-3.8811	0.00325231
AC099487.2	-0.413224	-0.680726	-4.02121	0.000104896	0.00599506	1.12203	-3.87898	0.00327035
AC005081.1	0.34701	0.15926	4.01649	0.000106751	0.00606648	1.09676	3.87471	0.0033093
CUZD1	-0.254511	-0.126578	-4.0156	0.000107102	0.00606648	1.11525	-3.87391	0.0033093
CRNDE	0.528522	3.35586	4.36505	0.000107157	0.00606648	2.28421	3.87379	0.0033093
ARL15	-0.176583	7.527	-4.01013	0.000109294	0.00616811	0.579805	-3.86897	0.00336475
AC024592.2	0.419144	5.83374	4.36664	0.000110298	0.00620527	2.17364	3.86675	0.00338502
MICU2	-0.182421	8.33336	-4.64213	0.000111379	0.00624661	3.11472	-3.86436	0.00340757
LINC02453	0.344864	-0.242622	4.0029	0.000112261	0.00626097	1.03539	3.86244	0.0034154
PPP4R3B	-0.0866197	6.58833	-4.00216	0.000112568	0.00626097	0.592896	-3.86177	0.0034154
AFTPH	-0.135766	6.59577	-4.0837	0.000112679	0.00626097	1.21719	-3.86153	0.0034154
AC084864.2	-0.355004	5.36179	-4.00628	0.00011399	0.00631436	1.02267	-3.8587	0.00344453
NDUFA9	-0.152633	5.81156	-5.06899	0.000114511	0.00632375	4.76432	-3.85759	0.00344965
ZBTB41	-0.215787	3.99484	-4.68236	0.000115108	0.00632891	3.41207	-3.85632	0.00345246
NAA30	-0.180791	4.65448	-4.4919	0.000115308	0.00632891	2.69217	-3.85589	0.00345246
LINC00174	0.257364	4.93837	4.02391	0.00011582	0.00633772	1.09123	3.85481	0.00345727
TUSC3	-0.111206	6.44415	-3.98731	0.00011892	0.00646505	0.545705	-3.84834	0.00352673
FGF13	-0.763482	5.49425	-5.5822	0.00011914	0.00646505	6.91798	-3.84789	0.00352673
SLU7	-0.236538	4.82857	-4.00473	0.000119557	0.00646505	1.03099	-3.84703	0.00352673
SMC6	-0.119754	5.44444	-3.9858	0.000119583	0.00646505	0.593849	-3.84698	0.00352673
AC090709.1	0.529086	7.31664	4.01621	0.000120638	0.00650254	0.995852	3.84483	0.00354718
CGRRF1	-0.208487	4.16742	-4.06751	0.000121779	0.00654442	1.24833	-3.84252	0.00357003
TADA1	-0.11657	4.16129	-3.97629	0.000123851	0.00663599	0.67119	-3.83838	0.00361998
NLRC4	0.296666	2.52573	4.57623	0.000128457	0.00686236	3.05315	3.8294	0.00374346
TAC4	0.301428	3.00011	3.96384	0.000129657	0.00690523	0.803665	3.82711	0.00376685
HIPK1-AS1	0.259508	1.26291	3.96307	0.000130027	0.00690523	0.936406	3.82641	0.00376685
SCAPER	-0.32554	10.6436	-3.99747	0.000130653	0.00690695	0.856503	-3.82522	0.00376779
DAXX	-0.296182	2.71301	-4.2713	0.000130826	0.00690695	1.94499	-3.8249	0.00376779
CCDC87	-0.512095	0.292907	-4.21413	0.000132096	0.00691778	1.3796	-3.82252	0.00377369
SMAD5	-0.174863	5.4904	-4.13193	0.000132648	0.00691778	1.40539	-3.82149	0.00377369
GTF2IRD2	0.381716	5.033	4.41771	0.000133249	0.00691778	2.42395	3.82037	0.00377369
LINC01309	0.388829	1.22592	4.9338	0.000134148	0.00691778	4.40877	3.81872	0.00377369
FMR1-AS1	0.356971	0.377786	4.58029	0.000134387	0.00691778	2.85186	3.81828	0.00377369
ZNF75D	-0.23095	4.35428	-4.05263	0.000134507	0.00691778	1.18664	-3.81806	0.00377369
NREP	-0.286423	5.47352	-5.82198	0.000134648	0.00691778	7.96043	-3.8178	0.00377369
SPIN3	-0.151847	3.22936	-3.95312	0.000134867	0.00691778	0.686749	-3.8174	0.00377369
AC005697.2	0.382707	0.74017	3.95311	0.000134872	0.00691778	0.910904	3.81739	0.00377369
NRIP2	0.497991	2.4132	3.99111	0.000134874	0.00691778	0.969782	3.81738	0.00377369
KPNA5	-0.124399	6.23987	-4.95304	0.00013866	0.00707597	4.2718	-3.81055	0.00385999
ARMT1	-0.250028	4.31554	-4.05971	0.00013897	0.00707597	1.21825	-3.80999	0.00385999
SEMA3F	-0.16044	4.43766	-3.94439	0.000139251	0.00707597	0.521763	-3.80949	0.00385999
AL022323.1	0.511097	2.61536	4.03073	0.000139531	0.00707597	1.11632	3.809	0.00385999
CHDH	0.592806	1.44549	4.76764	0.000140289	0.00707898	3.69821	3.80766	0.00386163
SPSB2	0.210163	3.9719	3.9422	0.000140376	0.00707898	0.609735	3.8075	0.00386163
ARMCX5-GPRASP2	-0.199083	5.42827	-4.36907	0.000141595	0.00712049	2.19104	-3.80537	0.00388427
CLIC2	-0.319681	0.789834	-3.93904	0.000142009	0.00712143	0.834489	-3.80464	0.00388479
ZNF117	-0.410066	2.84497	-4.75475	0.000144011	0.00719742	3.70331	-3.80118	0.00392624
PCYT1B	0.755974	-0.0282046	4.02728	0.000144324	0.00719742	0.630435	3.80064	0.00392624
ZFAT	-0.192873	5.11903	-3.9329	0.000145235	0.00722282	0.427197	-3.79908	0.0039401
PSMD11	-0.149618	5.46216	-4.01621	0.000147338	0.00730725	1.03174	-3.79551	0.00398616
GPAT4	-0.101652	4.21762	-3.92719	0.000148299	0.00730827	0.499605	-3.7939	0.00398671
PANK3	-0.18858	5.12943	-4.36542	0.000148454	0.00730827	2.1761	-3.79364	0.00398671
NREP-AS1	-0.533507	2.34573	-3.92613	0.000148873	0.00730827	0.645464	-3.79294	0.00398671
DNAH17	0.815711	4.7095	4.59019	0.000149455	0.00730827	3.02366	3.79197	0.00398671
FOXN2	-0.276319	4.62922	-5.81802	0.000149515	0.00730827	8.00653	-3.79187	0.00398671
MAML3	-0.307749	6.18552	-3.92313	0.000150517	0.00730827	0.326883	-3.79021	0.00398671
ZNF805	-0.227488	3.19983	-4.0413	0.000150566	0.00730827	1.17415	-3.79013	0.00398671
POLI	-0.171394	5.28583	-4.96413	0.000150606	0.00730827	4.42887	-3.79007	0.00398671
AL138831.1	0.502566	3.01427	4.28061	0.000151847	0.00734864	1.98996	3.78803	0.00400873
FADD	-0.431216	1.20724	-3.92761	0.00015269	0.00736965	0.579581	-3.78665	0.00402019
CKMT1B	-0.302387	3.61695	-3.95976	0.000153342	0.00737649	0.907222	-3.78559	0.00402393
AL049840.2	0.334818	3.6172	4.01136	0.00015369	0.00737649	1.07475	3.78503	0.00402393
GTF2E1	-0.142934	3.14424	-3.91673	0.000154073	0.00737649	0.556559	-3.78441	0.00402393
MOB1A	-0.185729	3.92818	-4.14508	0.000154471	0.00737649	1.50859	-3.78377	0.00402393
RBM33	-0.158741	7.1095	-3.97683	0.000155243	0.00738015	0.84997	-3.78253	0.00402592
AC007533.1	0.459998	4.17031	4.01316	0.000156027	0.00738015	1.07132	3.78128	0.00402592
AL023284.4	-0.543385	1.91061	-4.05793	0.000156116	0.00738015	1.17041	-3.78113	0.00402592
LINC01772	0.388534	3.5168	4.15169	0.000156187	0.00738015	1.54287	3.78102	0.00402592
HSD17B7	0.382084	4.22818	3.93	0.00015735	0.00741561	0.802916	3.77917	0.00404527
AC005920.2	0.364968	4.58119	3.9549	0.000157889	0.00742161	0.871388	3.77832	0.00404854
AL354864.1	0.298185	-0.0551161	3.90875	0.000158619	0.00743226	0.749706	3.77717	0.00405435
DOP1A	-0.164992	7.96807	-4.08637	0.000158941	0.00743226	1.16176	-3.77667	0.00405435
MATN1	0.782096	-1.19994	3.93042	0.000159586	0.00744309	-0.0660492	3.77566	0.00406026
FAM27E3	-0.264918	0.31241	-3.90504	0.000160779	0.00746889	0.745597	-3.7738	0.00407433
CHID1	0.156771	5.33879	3.90471	0.000160969	0.00746889	0.344844	3.77351	0.00407433
AC026202.2	0.366272	5.16775	3.95106	0.000163144	0.00755032	0.837956	3.77016	0.00411875
SETMAR	0.334898	3.15696	3.9092	0.00016546	0.00763789	0.739923	3.76664	0.00416652
SLC26A8	0.446026	-0.283346	3.89644	0.000165888	0.00763808	0.686185	3.76599	0.00416662
SLC35G1	-0.253461	1.93993	-3.89527	0.000166596	0.00764013	0.627971	-3.76493	0.00416774
GINS4	0.23552	0.769533	3.89496	0.000166782	0.00764013	0.722858	3.76465	0.00416774
TRIB1	0.758368	-0.423545	4.00774	0.000167208	0.00764021	0.531488	3.76401	0.00416779
FBXO45	-0.271092	2.99824	-3.9289	0.000171072	0.00779698	0.803902	-3.7583	0.0042533
MINPP1	-0.105253	4.78065	-3.88385	0.000173644	0.00789424	0.295165	-3.75456	0.00430636
SLC36A4	-0.148068	6.06335	-4.5935	0.000174311	0.0079046	2.97065	-3.7536	0.00431201
RPS6KA2	-0.2804	6.03902	-4.27209	0.000174871	0.00791006	1.85054	-3.7528	0.00431499
CLINT1	-0.119799	5.24266	-3.88085	0.000175548	0.0079208	0.250265	-3.75183	0.00432085
ATP1B3-AS1	0.53136	-0.380251	4.07665	0.000176123	0.00792686	0.737554	3.75101	0.00432415
RIMS2	-0.188743	12.2354	-3.91137	0.000178418	0.00801012	0.546527	-3.74776	0.00436958
AL353759.1	1.04982	0.696255	3.87599	0.000180053	0.00806341	0.386831	3.74547	0.00439864
SPG11	0.170572	6.4714	3.92467	0.000181437	0.00810384	0.699327	3.74355	0.0044207
IL16	0.618696	1.85155	4.40756	0.000182079	0.00810384	2.33873	3.74267	0.0044207
ZNF181	-0.277012	3.57635	-4.11468	0.000182306	0.00810384	1.41448	-3.74235	0.0044207
TYMS	0.306875	2.5759	4.20522	0.000184358	0.00817487	1.72722	3.73954	0.00445944
ZNF655	-0.164092	5.54392	-4.13181	0.000186179	0.00822268	1.39096	-3.73707	0.00448553
SYNCRIP	-0.10013	5.61018	-3.86425	0.000186418	0.00822268	0.169523	-3.73675	0.00448553
SPATA2	-0.255043	2.76859	-3.89933	0.000186806	0.00822268	0.697839	-3.73622	0.00448553
AL049828.1	-0.348858	6.10438	-4.13101	0.000188581	0.00823624	1.36736	-3.73384	0.00449292
ZDHHC3	-0.113359	3.92334	-3.86096	0.000188649	0.00823624	0.309514	-3.73375	0.00449292
NPL	0.311226	3.16684	3.87741	0.000189294	0.00823624	0.639462	3.73289	0.00449292
AL513365.2	0.194638	4.16111	3.85958	0.000189596	0.00823624	0.329993	3.73249	0.00449292
AC017028.1	0.402967	0.437532	3.85871	0.000190187	0.00823624	0.607227	3.73171	0.00449292
KIF5A	0.978682	1.59123	4.0119	0.000190533	0.00823624	1.04805	3.73125	0.00449292
TIAF1	-0.296631	-0.448754	-3.85788	0.000190761	0.00823624	0.604979	-3.73095	0.00449292
AL606491.1	-0.777944	0.585695	-3.93245	0.000190774	0.00823624	0.556835	-3.73093	0.00449292
RNF215	0.243838	4.5041	3.92656	0.00019128	0.00823833	0.777248	3.73026	0.00449406
PRPF40A	-0.12223	6.48189	-4.10459	0.000195198	0.00837312	1.23775	-3.72515	0.00456759
TCF7L2	-0.613637	3.50563	-4.69797	0.000195468	0.00837312	3.45629	-3.7248	0.00456759
CYB5D2	0.202331	4.48106	4.66726	0.000195805	0.00837312	3.27577	3.72437	0.00456759
RAD1	-0.213869	4.16701	-3.86066	0.00019707	0.00840723	0.582146	-3.72274	0.0045862
EMC1	-0.127394	5.69999	-5.16813	0.000198661	0.00841943	5.14594	-3.72071	0.00459286
AL121900.1	0.454899	2.12004	3.84867	0.000198836	0.00841943	0.487902	3.72049	0.00459286
PHF10	-0.251099	5.10162	-4.34786	0.000198934	0.00841943	2.13957	-3.72037	0.00459286
KIF24	0.395158	1.4685	4.15551	0.000199227	0.00841943	1.47388	3.72	0.00459286
USH2A	-0.255101	10.6213	-4.01763	0.000199774	0.00842279	0.846833	-3.7193	0.00459469
ZNF619	-0.324631	1.36518	-3.9006	0.000201227	0.00846423	0.579202	-3.71747	0.00461729
AC022217.3	0.962118	2.02688	3.93789	0.000204191	0.00856889	0.787564	3.71377	0.00467439
ZBTB10	-0.229669	3.43725	-4.09982	0.000206908	0.00866269	1.36608	-3.71043	0.00472556
LINC02447	0.246987	0.832962	3.83321	0.000208492	0.00869718	0.522281	3.7085	0.00474437
AC093690.1	0.344326	3.72705	4.01928	0.000208698	0.00869718	1.09532	3.70825	0.00474437
TIGD2	-0.373575	2.55672	-3.92578	0.000209289	0.00870168	0.789361	-3.70753	0.00474683
OXLD1	-0.362354	3.85948	-3.83166	0.000210287	0.00872302	0.49803	-3.70633	0.00475847
DSP	-0.141249	5.13643	-3.82954	0.000211261	0.0087433	0.0784934	-3.70516	0.00476953
AC058791.1	0.337989	5.10927	4.34655	0.000212551	0.00877649	2.07555	3.70361	0.00478763
VCPIP1	-0.217808	4.03789	-3.87936	0.000213201	0.00878319	0.636585	-3.70284	0.00479129
FASTKD5	-0.375129	2.44493	-3.85231	0.000214241	0.00879856	0.532285	-3.7016	0.00479968
GNAI2	0.249197	4.12031	4.03716	0.000214626	0.00879856	1.13688	3.70115	0.00479968
USP47	-0.151096	6.85628	-4.07242	0.00021504	0.00879856	1.11918	-3.70066	0.00479968
NIPBL-DT	-0.273839	4.00378	-3.93262	0.000216149	0.00881906	0.806053	-3.69935	0.00481086
KIAA1958	-0.216532	7.63591	-4.51477	0.000216922	0.00881906	2.58667	-3.69845	0.00481086
ZNF281	-0.320983	3.78795	-3.83939	0.000217011	0.00881906	0.52087	-3.69834	0.00481086
CCDC60	0.36382	5.96805	4.02855	0.000222509	0.00902212	1.0477	3.69199	0.00492163
ZNF571-AS1	-0.240129	3.61626	-4.2306	0.00022488	0.0090978	1.8069	-3.68929	0.00496291
MPDZ	-0.196538	6.33634	-4.26796	0.000228434	0.00920454	1.77928	-3.6853	0.00502114
GNAZ	-0.360212	4.70605	-3.99477	0.000228541	0.00920454	0.971991	-3.68518	0.00502114
TSPAN12	1.47508	-0.596068	3.80624	0.000229674	0.00922953	0.344378	3.68392	0.00503477
C10orf88	-0.18915	4.40212	-4.57998	0.000230437	0.00923953	2.96211	-3.68308	0.00504023
STIM2	-0.112873	7.32385	-4.44876	0.000231438	0.00925571	2.36152	-3.68197	0.00504905
GTF3C4	-0.190313	3.44888	-4.05845	0.000231868	0.00925571	1.22908	-3.6815	0.00504905
ZNF541	0.527597	1.00078	4.51394	0.000232542	0.00926205	2.69011	3.68076	0.00505251
CAB39L	-0.135142	5.02101	-4.91791	0.000233676	0.00928669	4.15794	-3.67952	0.00506595
PCNP	-0.203849	6.02713	-3.81435	0.000237529	0.00941901	0.354928	-3.67534	0.00513813
CLOCK	-0.0925005	6.62298	-3.79478	0.000239282	0.00946768	-0.119488	-3.67347	0.00516468
HCFC2	-0.169885	5.61832	-4.8952	0.000241641	0.00954006	4.11107	-3.67096	0.00520417
ATP2C2-AS1	-0.336464	2.33666	-3.84917	0.000242676	0.00955996	0.533091	-3.66987	0.00521502
H2AFV	-0.201018	6.45729	-3.80166	0.000243806	0.0095835	0.307043	-3.66868	0.00522786
NRG1	-0.811633	5.34182	-3.78817	0.000244994	0.0096092	-0.0290519	-3.66744	0.00524189
RGS20	-0.238336	6.02198	-3.78628	0.000246652	0.0096532	-0.132596	-3.66571	0.00526589
RMND5A	-0.214115	4.98766	-4.38743	0.000249471	0.00974237	2.24711	-3.6628	0.00531453
SPINT4	0.731364	5.19863	5.57077	0.000251979	0.009799	6.94392	3.66024	0.00534542
RNFT1-DT	0.51055	0.523401	3.98543	0.00025201	0.009799	0.70196	3.66021	0.00534542
SP3	-0.126388	6.17927	-4.25714	0.000252632	0.00980201	1.72323	-3.65958	0.00534707
AC091100.1	0.378707	2.04363	4.16558	0.000254458	0.00985164	1.57302	3.65773	0.00537413
PTK6	0.360985	0.0555753	3.77627	0.00025561	0.00986137	0.342506	3.65657	0.00537944
ZBED5	-0.232259	5.38964	-3.95728	0.000256479	0.00986137	0.80836	-3.6557	0.00537944
SMIM10L1	-0.283135	4.23448	-3.82717	0.000256875	0.00986137	0.461829	-3.65531	0.00537944
CCDC59	-0.273357	4.0522	-3.80953	0.000256901	0.00986137	0.41575	-3.65528	0.00537944
AC011815.1	-0.19042	0.377672	-3.77369	0.000257963	0.00986485	0.323273	-3.65422	0.00538134
ACBD7	-0.502862	2.01231	-3.84953	0.000258087	0.00986485	0.503202	-3.6541	0.00538134
ZNF462	-0.207702	7.26865	-3.82001	0.000260167	0.00992329	0.325146	-3.65204	0.00541322
CCDC172	-2.02097	2.18626	-4.8196	0.000265663	0.0100895	3.88673	-3.64667	0.00550389
AC096992.2	-0.365378	1.05005	-3.8202	0.000265871	0.0100895	0.296745	-3.64647	0.00550389
USP25	-0.171405	5.40889	-4.032	0.000266206	0.0100895	1.03795	-3.64614	0.00550389
FAM106A	-0.575474	5.45294	-3.86368	0.000267701	0.0101248	0.522148	-3.6447	0.00552316
PHF3	-0.160176	7.44241	-4.10673	0.000268807	0.0101453	1.18797	-3.64364	0.00553435
TTC32	-0.292528	4.62939	-3.76759	0.000271319	0.01021	0.269718	-3.64125	0.00556961
SPDYE5	0.305726	4.93825	4.08428	0.000271654	0.01021	1.2387	3.64093	0.00556961
AC116428.1	0.418704	1.57578	3.8131	0.000273056	0.0102413	0.344098	3.63961	0.0055867
CHST4	0.343198	2.47909	4.36079	0.000277444	0.0103843	2.27766	3.6355	0.00566468
SMAP1	-0.178793	6.74928	-5.86492	0.000279239	0.0103997	8.1103	-3.63384	0.0056731
TMPRSS9	0.376816	2.893	4.49544	0.000279319	0.0103997	2.75433	3.63376	0.0056731
ZNF304	-0.224826	1.6234	-3.75102	0.000279589	0.0103997	0.178505	-3.63351	0.0056731
C11orf74	-0.134306	4.72449	-3.74904	0.00028156	0.0104514	-0.161595	-3.6317	0.0057013
AC009812.1	-0.411142	1.83141	-3.77942	0.000282916	0.0104801	0.28041	-3.63046	0.00571697
CLTCL1	-0.83476	3.53105	-3.77701	0.000285767	0.010564	0.325767	-3.62787	0.00576272
RPIA	-0.18972	3.75311	-3.74309	0.000287561	0.0106085	-0.0763683	-3.62626	0.00578703
AL021155.5	0.447127	1.99453	4.22335	0.000288444	0.0106102	1.80321	3.62546	0.00578792
PLK2	1.04576	-0.814039	3.80754	0.000288784	0.0106102	-0.209745	3.62516	0.00578792
AC087286.2	0.404098	2.46824	3.81957	0.000290513	0.0106458	0.453396	3.62362	0.00580734
ANKRD24	0.338914	3.14061	3.7502	0.000290936	0.0106458	0.24562	3.62324	0.00580734
PIWIL2	-0.583364	2.12715	-3.78605	0.000292276	0.0106731	0.318812	-3.62205	0.00582226
ATP1A1	0.206274	6.97456	3.82118	0.00029571	0.010741	0.30849	3.61903	0.00585931
CMTM3	0.338704	0.483324	3.7351	0.000295799	0.010741	0.219656	3.61895	0.00585931
TWISTNB	-0.322902	2.828	-3.77154	0.000295926	0.010741	0.308365	-3.61884	0.00585931
CTDP1	-0.158492	3.79005	-3.73258	0.000298448	0.0108108	-0.13099	-3.61664	0.00589735
ABCC5-AS1	0.485549	2.93461	4.08579	0.000305359	0.0110389	1.32748	3.61071	0.0060218
AC004158.1	0.544288	1.62697	4.07182	0.000306695	0.011065	1.26668	3.60958	0.00603602
MOCS3	-0.451151	1.14526	-3.75219	0.000308131	0.0110946	0.0923228	-3.60837	0.00605216
FDPS	0.231889	5.43821	4.13535	0.00030937	0.0111169	1.32715	3.60733	0.00606437
AC090579.1	0.510258	9.31386	3.74504	0.000310074	0.01112	0.0463049	3.60674	0.00606606
LAMTOR3	-0.202797	4.38751	-3.76387	0.000312478	0.0111756	0.254591	-3.60473	0.00609636
SCAF4	-0.146911	5.35496	-4.047	0.000313311	0.0111756	1.0612	-3.60404	0.00609636
AC011092.2	0.399293	6.1104	3.78627	0.000313687	0.0111756	0.256646	3.60373	0.00609636
AC026894.1	0.474646	5.8715	3.76448	0.000314106	0.0111756	0.201334	3.60338	0.00609636
PHF20L1	-0.145847	6.16732	-4.44237	0.000315002	0.0111854	2.33587	-3.60264	0.00610169
ZBTB37	-0.241374	5.7395	-3.90904	0.000317318	0.0112373	0.648321	-3.60074	0.00613
KRT10	-0.415448	4.72526	-3.72133	0.000317712	0.0112373	0.117915	-3.60041	0.00613
LMO7-AS1	0.368076	3.46164	3.73198	0.000318591	0.0112462	0.189544	3.5997	0.0061349
AS3MT	0.402592	1.84403	4.25229	0.000321425	0.011308	1.88187	3.59739	0.00616857
CHTOP	-0.100202	5.1168	-3.71139	0.000321595	0.011308	-0.307192	-3.59725	0.00616857
GTPBP3	0.162224	3.42674	3.71049	0.00032261	0.0113215	-0.0989625	3.59643	0.00617597
DUBR	-0.269735	4.86319	-4.22984	0.000323977	0.0113474	1.71644	-3.59533	0.00619008
CABP4	-0.226129	6.96967	-3.70771	0.000328036	0.0114672	0.000107223	-3.59209	0.00625545
ABCB8	0.206452	5.00077	3.76969	0.000331639	0.0115568	0.245617	3.58924	0.00630431
RBM23	0.159688	6.33899	3.70243	0.000331882	0.0115568	-0.391753	3.58905	0.00630431
CCDC144NL	0.522453	3.78652	3.77655	0.000333979	0.0116003	0.312179	3.58741	0.00632802
PIGM	-0.268543	3.42571	-3.74095	0.000334572	0.0116003	0.215981	-3.58695	0.00632802
C16orf72	-0.185273	4.32008	-4.54758	0.000335671	0.0116003	2.89033	-3.58609	0.00632802
ZNF365	-0.268146	3.37031	-4.74985	0.000335707	0.0116003	3.63273	-3.58606	0.00632802
RHEBL1	0.648067	-0.384297	4.03993	0.000339395	0.0116441	0.883458	3.58321	0.00635193
JUN	0.841291	4.44693	3.76753	0.000339901	0.0116441	0.259668	3.58282	0.00635193
RNF157-AS1	0.297996	2.47673	3.73803	0.000340036	0.0116441	0.200305	3.58272	0.00635193
PFKFB2	-0.31453	7.25693	-3.7243	0.000340569	0.0116441	0.0230054	-3.58231	0.00635193
COPB1	-0.107515	5.85487	-3.83021	0.000340776	0.0116441	0.371797	-3.58215	0.00635193
B3GALT2	0.477704	1.64917	3.69495	0.000340856	0.0116441	-0.0206343	3.58209	0.00635193
TNPO2	0.185146	5.022	3.72975	0.000341941	0.011659	0.127355	3.58126	0.00636008
LTBP3	0.268424	2.91476	4.29772	0.000343151	0.0116782	2.02724	3.58034	0.00637051
RBM7	-0.251219	2.7288	-3.72223	0.000344061	0.011687	0.156321	-3.57965	0.00637535
AC008892.1	0.601427	3.4954	3.70383	0.000345611	0.0117176	0.104504	3.57847	0.00639202
FABP5	0.494396	4.34544	3.78177	0.000347255	0.0117314	0.305623	3.57723	0.00639956
DPYSL3	-0.168397	8.99709	-3.94203	0.000347322	0.0117314	0.607893	-3.57718	0.00639956
ABHD13	-0.234705	3.6746	-3.74727	0.000348735	0.0117571	0.229184	-3.57612	0.00641357
RAP1GDS1	-0.123983	8.85279	-3.88553	0.000350238	0.0117857	0.406994	-3.57499	0.00642916
PEX2	-0.183081	5.24188	-3.72053	0.000353207	0.0118634	0.0832762	-3.57278	0.00647157
PAIP2B	-0.172582	6.46082	-3.75196	0.000354027	0.0118688	0.12509	-3.57218	0.00647451
H2AFX	-0.445118	4.22026	-3.68422	0.000355393	0.0118925	0.0296189	-3.57117	0.00648742
RNF146	-0.16131	4.96758	-3.7322	0.000356367	0.0119029	0.129115	-3.57045	0.00649312
AC131391.1	-0.531491	-0.306582	-3.72531	0.000358727	0.0119482	-0.229821	-3.56872	0.00651783
MBP	1.10331	1.60675	3.87066	0.00035905	0.0119482	0.560684	3.56849	0.00651783
CTNNB1	-0.0892684	6.75563	-3.67825	0.000361246	0.0119991	-0.514421	-3.56689	0.00654559
KIAA1586	-0.193594	3.42378	-4.21156	0.000365603	0.0121214	1.74207	-3.56374	0.00661233
RFX3-AS1	-0.296527	6.57293	-3.70274	0.000367343	0.0121568	-0.0139992	-3.5625	0.00663159
AP000487.1	0.250165	3.33148	3.76736	0.000368302	0.0121652	0.296883	3.56181	0.00663622
CCDC82	-0.198992	6.10004	-4.00736	0.000368951	0.0121652	0.891468	-3.56135	0.00663622
ZRANB1	-0.163496	5.2243	-3.9411	0.000372326	0.0122541	0.741102	-3.55896	0.00668468
INE1	0.53007	0.894374	3.81723	0.000374267	0.0122612	0.3238	3.55759	0.00668855
ZNF879	-0.227962	2.40387	-4.04842	0.000374705	0.0122612	1.20494	-3.55729	0.00668855
LYRM9	0.242196	2.84441	3.66742	0.000375175	0.0122612	-0.165799	3.55696	0.00668855
UPRT	-0.174036	3.71829	-3.66735	0.000375265	0.0122612	-0.330769	-3.55689	0.00668855
LMAN1	-0.141452	6.06074	-3.79899	0.000377082	0.0122982	0.271931	-3.55562	0.00670875
UNC119	-0.334995	9.41452	-3.67134	0.000377973	0.012305	-0.190991	-3.555	0.00671244
CAMSAP1	-0.147523	8.93506	-3.71442	0.000382433	0.0124277	-0.0764099	-3.55192	0.00677938
TMEM161B	-0.192839	5.48303	-4.88348	0.000384765	0.0124712	4.12056	-3.55032	0.00680312
PICART1	0.25212	1.2241	3.65989	0.000385157	0.0124712	-0.0408465	3.55005	0.00680312
RFTN1	0.367381	3.46195	3.74089	0.000388	0.0125303	0.214382	3.54811	0.00683539
CDKL3	-0.156441	6.24085	-3.66313	0.000388376	0.0125303	-0.118594	-3.54786	0.00683539
HSPBAP1	-0.293665	4.88535	-4.39567	0.0003934	0.0126532	2.28325	-3.54447	0.00690241
AC104984.3	0.431726	3.19314	4.00742	0.00039359	0.0126532	1.06104	3.54434	0.00690241
ARFGEF1	-0.135269	8.82465	-4.39201	0.000394729	0.0126672	2.08428	-3.54358	0.00691004
STK33	-0.163446	8.94374	-3.72242	0.000396128	0.0126895	-0.0593317	-3.54265	0.0069222
DGKZ	0.276842	2.3572	3.75293	0.000401131	0.0128269	0.250621	3.53934	0.00699717
AC007387.3	0.462583	4.5616	3.64768	0.00040189	0.0128284	-0.415549	3.53884	0.00699798
ZNF764	-0.275806	2.2048	-3.66115	0.00040468	0.0128946	-0.0513255	-3.53701	0.0070341
DLEU1	0.278501	6.94781	3.68223	0.000405856	0.0129045	-0.102092	3.53625	0.0070395
ZMYND12	0.225444	2.8787	3.80349	0.000406917	0.0129045	0.414689	3.53556	0.0070395
KDM7A	-0.223347	5.77673	-4.74797	0.000407141	0.0129045	3.40357	-3.53541	0.0070395
OGFOD1	0.142329	4.99624	3.78096	0.000407979	0.0129083	0.260957	3.53487	0.00704158
FAM160B1	-0.173072	4.94002	-4.0998	0.000409376	0.0129298	1.27157	-3.53396	0.00705331
CCDC144NL-AS1	0.6694	2.48043	3.83977	0.000410159	0.0129319	0.522261	3.53346	0.00705441
AC060809.1	0.651989	0.213605	3.73073	0.000411097	0.0129388	-0.0419551	3.53286	0.0070582
KCTD6	-0.247964	4.32128	-3.75529	0.000416573	0.0130705	0.218304	-3.52936	0.00713003
ELAVL4	0.956701	0.0610047	3.88249	0.00041704	0.0130705	0.519509	3.52906	0.00713003
MIR217HG	-1.11628	-1.24111	-5.87927	0.000417459	0.0130705	7.80284	-3.52879	0.00713003
ADAMTS13	0.25221	2.1001	3.81218	0.000420509	0.0131431	0.433201	3.52687	0.00716964
EID3	-0.348709	3.22511	-3.6932	0.00042283	0.0131927	0.0716616	-3.52541	0.00719673
NMNAT1	0.283916	3.50076	3.77536	0.000424212	0.0131976	0.313917	3.52454	0.00719939
TTC25	0.231335	3.92975	3.67528	0.000424453	0.0131976	-0.00335598	3.52439	0.00719939
CYP2U1	-0.116417	2.9095	-3.63021	0.000427029	0.0132548	-0.322451	-3.52279	0.0072306
LINC01595	0.523929	2.81226	3.62526	0.000434409	0.0134415	-0.249233	3.51825	0.00733242
AC007298.2	0.531217	0.431986	3.69969	0.000435458	0.0134415	-0.121396	3.51761	0.00733242
TRMT10B	0.223895	5.0603	3.9666	0.0004357	0.0134415	0.796115	3.51746	0.00733242
CLCF1	0.421042	1.8792	3.99052	0.000436416	0.0134415	1.01523	3.51702	0.00733242
TMEM74	-0.357971	2.56218	-3.63075	0.00043727	0.0134415	-0.126505	-3.5165	0.00733242
DMRT2	0.587766	-0.00404633	3.81769	0.000437617	0.0134415	0.201405	3.51629	0.00733242
AL356489.2	-0.367155	2.37261	-3.98377	0.000438889	0.0134415	0.991278	-3.51552	0.00733242
TTC30B	-0.373293	2.37542	-3.64893	0.000439015	0.0134415	-0.07724	-3.51545	0.00733242
QSER1	-0.153241	5.50463	-3.97549	0.000441674	0.0134922	0.812869	-3.51384	0.00736011
BAG5	-0.281112	4.40161	-3.69481	0.000442771	0.0134922	0.0255579	-3.51318	0.00736011
TM9SF3	-0.12193	6.3974	-3.78567	0.000442921	0.0134922	0.197023	-3.51309	0.00736011
ZNF706	-0.187482	5.62112	-3.73188	0.000452658	0.013751	0.0729668	-3.50731	0.00750128
WDR5B	-0.349992	2.76494	-3.64485	0.000452945	0.013751	-0.074353	-3.50714	0.00750128
ASPHD1	0.229537	4.17368	3.88176	0.000456596	0.0138385	0.602917	3.50501	0.00754902
AC004522.5	0.349034	-0.086981	3.61026	0.000457537	0.0138437	-0.161734	3.50446	0.00755186
C2orf66	-0.343153	0.147655	-3.60301	0.000469129	0.0141707	-0.201632	-3.49779	0.00773021
BBX	-0.184613	7.44812	-4.18064	0.000470239	0.0141804	1.29148	-3.49716	0.00773551
FAM8A1	-0.221025	3.98463	-3.68564	0.000471459	0.0141934	0.0193938	-3.49647	0.00774262
POMZP3	0.292256	4.16743	3.80269	0.000475644	0.0142955	0.355267	3.49411	0.0077983
IGIP	-0.348138	2.98155	-3.65594	0.000481247	0.0144205	-0.0402453	-3.49098	0.00786646
DENND5B-AS1	0.752448	0.122654	3.65159	0.000481403	0.0144205	-0.355323	3.4909	0.00786646
NAB1	-0.220153	5.06185	-4.52992	0.000483752	0.0144668	2.75596	-3.4896	0.00789172
AP002892.1	0.361855	3.13025	3.67592	0.000487972	0.014562	0.0204049	3.48727	0.00794367
POU6F1	0.164375	5.08943	3.59124	0.000488555	0.014562	-0.677507	3.48695	0.00794367
AP000350.7	0.350989	2.62836	3.75338	0.000490605	0.0145793	0.259208	3.48583	0.00795311
CCDC112	-0.157438	5.08175	-3.84122	0.000490903	0.0145793	0.3987	-3.48567	0.00795311
AL031666.3	0.214662	1.04125	3.58912	0.000492118	0.0145793	-0.241161	3.48501	0.00795311
TSPOAP1-AS1	0.185835	4.1454	3.58892	0.000492464	0.0145793	-0.569544	3.48482	0.00795311
FALEC	0.328193	3.15744	3.72586	0.000494019	0.0145793	0.169766	3.48398	0.00795311
EIF4EBP2	-0.16411	4.5071	-3.62338	0.000494141	0.0145793	-0.189802	-3.48391	0.00795311
PRELID3B	-0.403801	2.22943	-3.59232	0.000494804	0.0145793	-0.252066	-3.48355	0.00795311
GARS	-0.125323	4.64243	-3.58565	0.000498036	0.0146506	-0.67723	-3.48181	0.00799198
PIK3CA	-0.167879	6.62383	-4.3399	0.000501361	0.0147243	1.83983	-3.48003	0.0080322
PGM3	-0.200744	5.01255	-6.70043	0.000503402	0.0147602	11.9942	-3.47894	0.00805178
CCDC186	-0.156462	6.17366	-3.7819	0.000504963	0.0147819	0.17323	-3.47811	0.00806361
FHL1	-0.292508	4.47886	-3.72365	0.000509195	0.0148584	0.109061	-3.47587	0.00810534
NT5C2	-0.177266	7.6575	-3.77894	0.000509227	0.0148584	0.133059	-3.47586	0.00810534
MIEF1	-0.178316	3.22001	-3.58969	0.000510885	0.0148826	-0.237873	-3.47498	0.00811857
CFAP65	0.186996	5.32054	3.67086	0.000512797	0.0149142	-0.0926394	3.47398	0.0081358
DNAJC25	-0.234144	5.53336	-4.35347	0.00051557	0.014956	1.93529	-3.47253	0.00815859
API5	-0.11462	5.44232	-4.27886	0.000515895	0.014956	1.78981	-3.47236	0.00815859
THSD1	-0.230247	4.28594	-3.64268	0.000519345	0.0150318	-0.133476	-3.47057	0.00819994
ZNF189	-0.252743	3.50766	-3.68833	0.000524318	0.0151024	0.0351491	-3.46802	0.00823846
HIST1H2AC	0.76944	4.08436	3.62206	0.000524882	0.0151024	-0.176312	3.46773	0.00823846
AL590064.1	-0.405786	1.24109	-4.2738	0.000524982	0.0151024	1.8676	-3.46767	0.00823846
LIN7C	-0.27677	4.99579	-3.57756	0.000525141	0.0151024	-0.338511	-3.46759	0.00823846
LINC00607	-0.420876	1.70219	-4.64605	0.000526135	0.0151069	3.3122	-3.46709	0.0082409
RAB3IP	-0.16282	7.07519	-3.81402	0.000528496	0.0151505	0.223633	-3.46588	0.0082647
DENND6A-AS1	0.237494	5.1659	3.6	0.000529589	0.0151577	-0.286858	3.46533	0.00826862
NEDD1	-0.123622	4.37527	-4.31197	0.000534554	0.0152755	1.89527	-3.46282	0.0083329
CAMK2N2	0.965835	1.12102	3.69016	0.000535615	0.0152816	0.0263164	3.46228	0.00833621
GLA	0.433643	2.00864	3.56343	0.000537473	0.0152884	-0.360976	3.46135	0.00833993
NDUFA10	-0.152578	6.7958	-3.87512	0.000537553	0.0152884	0.459415	-3.46131	0.00833993
IDH2-DT	0.819957	-0.819892	3.80776	0.00054047	0.0153196	-0.0222658	3.45985	0.00835697
TMEM38B	-0.128089	4.57958	-3.56164	0.000540772	0.0153196	-0.746997	-3.4597	0.00835697
TMEM11	-0.227922	4.07851	-3.57177	0.000541204	0.0153196	-0.315435	-3.45949	0.00835697
MYO6	-0.137643	8.19578	-3.92623	0.000542411	0.0153297	0.518083	-3.45889	0.00836245
CLUL1	0.267424	8.228	5.11016	0.000543742	0.0153432	4.81053	3.45823	0.00836983
AC002546.1	0.491056	0.260849	3.61773	0.000545191	0.01536	-0.393194	3.45751	0.00837901
ZNF687	-0.200504	2.82515	-3.56605	0.000548746	0.015436	-0.30799	-3.45576	0.00842047
NUP160	0.187715	6.40299	3.58181	0.000549932	0.0154453	-0.395401	3.45518	0.0084255
ELOVL2	-0.146205	6.02988	-3.59737	0.000553011	0.0155076	-0.337032	-3.45367	0.00845948
CSDC2	0.798408	0.495362	3.73273	0.000554013	0.0155115	0.0923025	3.45318	0.00846162
AC046130.2	-0.463083	0.183127	-3.67311	0.000554899	0.0155122	-0.215105	-3.45275	0.008462
LIG4	-0.367637	3.45629	-3.71175	0.000558002	0.0155747	0.113594	-3.45125	0.00849613
SEC62	-0.221705	8.10416	-3.56448	0.000562414	0.0156736	-0.505604	-3.44912	0.00855005
RYK	-0.132199	6.51019	-4.05831	0.000565983	0.0157303	1.02777	-3.44741	0.00858099
EXD2	-0.0910276	4.33365	-3.54809	0.000566401	0.0157303	-0.772917	-3.44721	0.00858099
HNRNPD	-0.112608	7.00238	-3.63179	0.000567071	0.0157303	-0.296039	-3.44689	0.00858099
ZBED8	-0.324793	2.45493	-3.62949	0.000568744	0.0157525	-0.120597	-3.4461	0.00859307
MIRLET7BHG	-0.262584	5.08565	-3.56412	0.000576168	0.0159336	-0.38793	-3.44259	0.00869187
UBQLN2	-0.260115	3.87651	-3.55081	0.000580783	0.0160184	-0.369674	-3.44043	0.00873813
SPON1	0.488749	4.27588	3.63119	0.000581014	0.0160184	-0.158212	3.44033	0.00873813
SECISBP2L	-0.148323	6.07808	-3.76666	0.00058414	0.016045	0.107841	-3.43887	0.00875264
SH2D3C	0.401186	1.41706	3.9873	0.000584826	0.016045	0.970966	3.43856	0.00875264
WRNIP1	-0.143374	5.10077	-4.50884	0.000585639	0.016045	2.6539	-3.43818	0.00875264
HEG1	-0.21269	7.42568	-3.55001	0.000586379	0.016045	-0.521184	-3.43784	0.00875264
FAM20A	0.305174	2.63398	3.53763	0.000586966	0.016045	-0.52787	3.43757	0.00875264
EVL	-0.168282	9.34659	-3.56138	0.000587326	0.016045	-0.553822	-3.4374	0.00875264
COX15	0.143202	4.67535	4.0125	0.000589499	0.0160799	0.948572	3.4364	0.00877171
SLC16A8	0.405311	0.0749079	3.5353	0.000591647	0.0161029	-0.380715	3.43541	0.00878425
ZC3H13	-0.147255	6.32385	-3.8704	0.000592352	0.0161029	0.450074	-3.43509	0.00878425
LINC00159	-0.273372	2.94655	-3.53462	0.000593025	0.0161029	-0.674931	-3.43478	0.00878425
ANO8	0.181852	2.72597	3.53373	0.000594815	0.0161272	-0.575588	3.43397	0.00879749
AC103974.1	-0.522474	0.499539	-3.64223	0.000597984	0.0161887	-0.239208	-3.43253	0.00883107
ZNF295-AS1	-0.3196	2.46139	-3.53125	0.000599852	0.0162149	-0.629956	-3.43168	0.00884535
ZNF420	-0.118372	5.46315	-3.53003	0.000602361	0.0162583	-0.919959	-3.43055	0.00886903
HESX1	0.314371	2.0333	4.14979	0.000605836	0.0162922	1.55106	3.42899	0.00888752
P2RX6	0.276147	-0.106151	3.52813	0.000606262	0.0162922	-0.40181	3.4288	0.00888752
ZMYM4-AS1	0.35708	4.54072	3.59971	0.000606913	0.0162922	-0.265808	3.42851	0.00888752
NAA15	-0.0956591	6.66974	-4.43755	0.000607237	0.0162922	2.20962	-3.42836	0.00888752
ARL14EP	-0.237007	4.68106	-3.70472	0.000611896	0.0163559	0.00234862	-3.42629	0.00892225
UBE3A	-0.112275	6.94316	-3.82745	0.000612799	0.0163559	0.27934	-3.42589	0.00892225
ACTR3	-0.142946	4.9729	-3.83294	0.000613572	0.0163559	0.355713	-3.42554	0.00892225
NAF1	-0.180102	5.57062	-3.73411	0.000614522	0.0163559	0.0369484	-3.42512	0.00892225
BRD3OS	-0.319666	3.28009	-3.54351	0.000614959	0.0163559	-0.377192	-3.42493	0.00892225
DBF4B	0.213093	4.64304	3.5278	0.000615061	0.0163559	-0.46506	3.42488	0.00892225
PAPOLG	-0.099259	5.01718	-3.51947	0.000624353	0.0165544	-0.917609	-3.42081	0.00903051
C5orf34	0.255481	1.37451	3.51916	0.000625012	0.0165544	-0.479437	3.42052	0.00903051
DIDO1	-0.10714	5.89121	-3.59198	0.000625282	0.0165544	-0.375774	-3.4204	0.00903051
KLHL9	-0.303969	3.84414	-3.55483	0.000627884	0.0165988	-0.366729	-3.41927	0.00905476
CBX8	-0.341673	2.83792	-3.52934	0.000631637	0.0166676	-0.414278	-3.41765	0.00909227
ALDH1L2	0.381794	2.85017	3.66632	0.000632336	0.0166676	-0.00944017	3.41735	0.00909227
LHFPL5	0.363975	4.93756	3.70919	0.000637281	0.0167734	0.0434331	3.41523	0.00914998
PLEKHA3	-0.156944	5.54538	-3.66295	0.000641989	0.0168569	-0.149461	-3.41323	0.00919556
C16orf87	-0.216754	3.45377	-3.83177	0.000642329	0.0168569	0.476462	-3.41308	0.00919556
TAGAP	0.337398	0.064449	3.50905	0.00064681	0.0169498	-0.457309	3.41119	0.00924624
C5orf24	-0.208017	4.57823	-3.59486	0.000650897	0.0170106	-0.299781	-3.40947	0.00927942
AC024267.4	0.362835	2.7712	3.53795	0.000651021	0.0170106	-0.388609	3.40942	0.00927942
SH3BGR	-0.339013	4.51799	-4.41353	0.000654722	0.0170826	2.26796	-3.40787	0.00931865
PDS5B	-0.173736	6.49995	-4.48667	0.00065731	0.0171245	2.44516	-3.40679	0.00934152
EXOC5	-0.110068	6.3037	-4.14742	0.000658232	0.0171245	1.19944	-3.40641	0.00934152
ASPH	-0.136547	8.53652	-3.81153	0.00065977	0.0171397	0.067919	-3.40577	0.00934984
C5orf15	-0.139388	5.06596	-3.60327	0.000663656	0.0172158	-0.297736	-3.40417	0.00939136
CD99L2	-0.21321	5.79587	-3.50194	0.000666521	0.0172194	-0.591103	-3.40299	0.00939331
NBEA	-0.17446	9.1368	-3.62995	0.000666537	0.0172194	-0.420478	-3.40299	0.00939331
KHDC1	0.197812	5.36428	3.61296	0.000666663	0.0172194	-0.278988	3.40293	0.00939331
D2HGDH	0.167321	3.34944	3.49868	0.000669917	0.0172554	-0.763867	3.4016	0.00941293
PITPNA	0.189989	5.06021	3.50887	0.000669973	0.0172554	-0.549791	3.40158	0.00941293
AC096637.2	0.294902	2.09806	4.06841	0.000672849	0.0173047	1.26844	3.40041	0.00943985
POLR1D	-0.199325	5.13034	-3.50966	0.000675075	0.0173244	-0.557737	-3.39951	0.00945059
ST3GAL5	-0.20837	6.15739	-3.65687	0.00067554	0.0173244	-0.193652	-3.39932	0.00945059
AC105206.2	0.329652	2.26605	3.91644	0.000677454	0.0173253	0.745454	3.39854	0.00945108
NEFM	1.02636	2.85494	3.75047	0.0006775	0.0173253	0.226021	3.39853	0.00945108
ZNF33A	-0.0849982	6.60128	-3.49225	0.000684616	0.0174816	-1.10357	-3.39567	0.00953634
AC105339.3	0.308286	4.73818	4.11774	0.000685553	0.0174816	1.21219	3.39529	0.00953634
SPINK8	0.395871	1.9234	3.76032	0.000688839	0.0175405	0.272189	3.39398	0.00956849
STAG3	0.27665	3.84678	3.49954	0.000693064	0.0176232	-0.521013	3.39231	0.00961358
AL031768.2	0.373867	3.08536	3.78824	0.000696182	0.0176775	0.365893	3.39108	0.00964321
PPFIA2-AS1	0.467203	6.15649	3.50777	0.000697954	0.0176871	-0.601997	3.39038	0.00964844
AC108057.1	-0.351984	5.37051	-3.60101	0.000698525	0.0176871	-0.337762	-3.39016	0.00964844
AC007541.1	-0.340227	3.21344	-3.54399	0.000702796	0.017746	-0.377384	-3.38849	0.00968054
ZNF121	-0.229024	3.76498	-3.57455	0.00070282	0.017746	-0.313297	-3.38848	0.00968054
CFAP58	0.513363	0.445554	3.8833	0.00070714	0.01783	0.61241	3.3868	0.0097264
DMTN	0.693807	1.41938	3.63879	0.000710923	0.0179003	-0.110227	3.38533	0.00976476
MAN2C1	0.194567	4.9887	3.59074	0.000713563	0.017929	-0.334002	3.38431	0.00978042
ILDR2	-0.245366	4.27291	-3.8944	0.000714321	0.017929	0.586078	-3.38402	0.00978042
AL390719.3	0.323665	2.50218	3.86633	0.000715051	0.017929	0.611514	3.38374	0.00978042
DISP3	-0.612097	4.06845	-3.90337	0.000719412	0.0179723	0.604363	-3.38207	0.00980399
BLVRB	0.74121	2.17686	3.55045	0.000720601	0.0179723	-0.352861	3.38162	0.00980399
SORCS2	0.909366	1.98312	3.47701	0.000720714	0.0179723	-0.617712	3.38158	0.00980399
AL138694.1	0.369062	-0.698544	3.47699	0.000720767	0.0179723	-0.570422	3.38156	0.00980399
HELZ	-0.115504	7.74632	-3.47396	0.000728163	0.0181316	-1.20923	-3.37875	0.00989089
AC011374.2	-0.424721	-0.436015	-3.49923	0.000734076	0.0182535	-0.854452	-3.37653	0.00995743
NIFK	-0.354361	4.47726	-3.90732	0.000737524	0.018314	0.643264	-3.37524	0.0099904
IL3RA	0.240879	6.64884	3.72338	0.000739387	0.0183347	-0.059559	3.37454	0.0100017
SHC4	0.247086	0.0053927	3.469	0.000740395	0.0183347	-0.574306	3.37417	0.0100017
GNAO1	0.446975	3.90705	3.84722	0.000745471	0.0183858	0.486852	3.37229	0.0100296
CDK11A	0.299853	5.08322	3.48408	0.000745737	0.0183858	-0.631362	3.37219	0.0100296
AC009120.4	0.392158	2.85915	4.11751	0.000745789	0.0183858	1.40231	3.37217	0.0100296
AC108451.1	0.360262	0.0622933	3.84604	0.000747444	0.0183858	0.492981	3.37156	0.0100296
COX6B2	0.299889	0.460377	3.46613	0.000747565	0.0183858	-0.590266	3.37151	0.0100296
NAV2	-0.863054	0.48449	-3.46557	0.000748975	0.0183906	-0.644455	-3.37099	0.0100322
NDRG4	0.810698	3.30285	3.60259	0.000749801	0.0183906	-0.222161	3.37069	0.0100322
FBXO8	-0.181499	4.44945	-3.70546	0.000755189	0.0184975	-0.00360756	-3.36872	0.0100905
ABI3BP	0.55799	5.1871	4.71641	0.000757754	0.0184992	3.38953	3.36778	0.0100914
OSGEPL1	0.139505	4.99233	3.78162	0.000758317	0.0184992	0.188738	3.36758	0.0100914
NEDD4	-0.155778	6.18289	-4.3194	0.000758341	0.0184992	1.82041	-3.36757	0.0100914
SPDYE21P	0.319421	4.17991	3.86309	0.000770555	0.0187669	0.477048	3.36316	0.0102375
MDM1	-0.148332	5.41666	-4.63937	0.000771401	0.0187669	3.17159	-3.36286	0.0102375
OR5P3	-0.492977	1.9204	-3.72212	0.000772995	0.0187719	0.165348	-3.36229	0.0102402
RIOK2	-0.193171	4.57993	-4.53184	0.000773689	0.0187719	2.75167	-3.36204	0.0102402
AL161630.1	0.473244	1.54751	3.45533	0.000775153	0.0187821	-0.694243	3.36152	0.0102458
ZNRF2	-0.123056	5.00438	-3.45447	0.000777408	0.0188114	-1.11877	-3.36072	0.0102617
TMEM106B	-0.152704	6.1467	-3.50734	0.000780292	0.0188558	-0.637707	-3.35969	0.010286
SCIMP	0.336781	3.28701	3.74036	0.00078381	0.0189101	0.203736	3.35845	0.0103156
AC008147.1	0.367861	0.930313	3.65336	0.000784638	0.0189101	-0.113851	3.35816	0.0103156
TMX4	-0.237523	6.61984	-3.4752	0.000791737	0.0190557	-0.738843	-3.35567	0.010395
SEMA3A	-0.135026	8.43586	-3.44852	0.000793056	0.0190619	-1.31068	-3.35521	0.0103984
ARHGEF9	-0.236454	8.80419	-3.46809	0.000796827	0.019127	-0.821436	-3.35389	0.0104339
AAR2	-0.18175	3.30144	-3.80668	0.000799153	0.0191573	0.40032	-3.35309	0.0104504
AC090772.1	0.310986	6.49315	3.44541	0.000801349	0.0191787	-1.20994	3.35233	0.0104621
MEX3C	-0.174914	3.54112	-4.11098	0.000802174	0.0191787	1.38324	-3.35204	0.0104621
VLDLR	-0.10436	5.43604	-3.44086	0.000813635	0.0194124	-1.2042	-3.34811	0.0105896
JRKL	-0.324896	3.6645	-3.90794	0.000814894	0.0194124	0.656002	-3.34769	0.0105896
AC107072.2	0.351681	5.90911	3.48201	0.000815184	0.0194124	-0.690781	3.34759	0.0105896
SPNS1	0.215042	4.03267	3.77251	0.000819177	0.0194817	0.260575	3.34623	0.0106274
MTPN	-0.224278	4.63448	-3.5098	0.000820389	0.0194848	-0.559685	-3.34582	0.0106291
TCEA1	-0.118577	6.47264	-3.72636	0.000822256	0.0195034	-0.0719728	-3.34519	0.0106392
AC026691.1	-0.426522	0.670353	-3.45706	0.000824597	0.0195206	-0.772592	-3.3444	0.0106486
KCNC1	0.368542	4.27739	3.54018	0.000826674	0.0195206	-0.445358	3.34371	0.0106486
ZHX1	-0.140828	5.4136	-3.68672	0.000827018	0.0195206	-0.0937211	-3.34359	0.0106486
BEST1	0.342294	2.59704	3.43521	0.000829129	0.0195206	-0.836903	3.34288	0.0106486
PLCG1	-0.166987	3.02784	-3.94318	0.000829189	0.0195206	0.810612	-3.34286	0.0106486
AXIN2	-0.211318	2.13877	-4.09807	0.000829487	0.0195206	1.36951	-3.34276	0.0106486
PCDHGA10	0.313852	1.95389	3.43426	0.000831769	0.0195488	-0.782199	3.342	0.010664
TMEM233	0.43626	4.10856	4.05767	0.000835182	0.0196034	1.19011	3.34086	0.0106938
JDP2	-0.155435	5.80998	-3.43837	0.000842248	0.0196956	-0.79423	-3.33852	0.0107441
FADS2	0.223469	5.42733	3.42977	0.000844301	0.0196956	-1.20544	3.33785	0.0107441
TRIM4	-0.166571	5.16765	-3.57027	0.000845351	0.0196956	-0.431468	-3.3375	0.0107441
HAUS4	0.288304	2.77306	4.00973	0.000845615	0.0196956	1.07518	3.33742	0.0107441
AL731559.1	-0.313468	1.80396	-3.57897	0.000845683	0.0196956	-0.268765	-3.33739	0.0107441
AMZ1	0.348253	4.30065	3.44853	0.000845763	0.0196956	-0.698465	3.33737	0.0107441
MAIP1	-0.243365	3.99348	-3.85923	0.000846769	0.0196956	0.524261	-3.33704	0.0107441
AC012313.6	0.255171	4.68971	3.44445	0.000849252	0.0197198	-0.725076	3.33622	0.0107573
ZNF835	-0.357724	1.58932	-3.45717	0.000850417	0.0197198	-0.662829	-3.33584	0.0107573
CCDC24	0.207008	5.92073	3.581	0.000851096	0.0197198	-0.464018	3.33562	0.0107573
N4BP3	0.195266	2.12942	3.42694	0.000852327	0.0197229	-0.823996	3.33522	0.010759
AC119673.2	0.810888	5.91813	3.62556	0.000853643	0.019728	-0.319834	3.33479	0.0107618
IFI27	-0.372946	2.73051	-3.48615	0.000858747	0.0198205	-0.539735	-3.33313	0.0108122
NCS1	0.802073	0.497152	3.59508	0.000861585	0.0198606	-0.279687	3.33221	0.0108341
CD2AP	-0.153086	5.86711	-3.68247	0.000863338	0.0198755	-0.177781	-3.33165	0.0108422
WWP1	-0.108712	7.67955	-3.85514	0.000866263	0.0199174	0.201299	-3.33071	0.0108651
SLC16A11	0.615873	-0.63117	3.8932	0.000869449	0.0199652	0.471412	3.32968	0.0108911
CEP97	-0.157039	4.68175	-4.06414	0.000879678	0.0201743	1.11073	-3.32642	0.0110052
GRAMD1C	-0.334363	6.52611	-4.08575	0.000885131	0.0202468	1.01087	-3.3247	0.0110448
SLC66A2	-0.21622	5.64933	-3.51407	0.00088602	0.0202468	-0.621099	-3.32442	0.0110448
LRATD1	0.749183	-1.01154	3.58071	0.000886213	0.0202468	-0.583437	3.32436	0.0110448
AC011476.3	0.415667	4.07467	3.68904	0.000891407	0.020326	-0.0103389	3.32273	0.011088
EWSR1	-0.113554	6.30382	-3.74274	0.000893141	0.020326	-0.0628516	-3.32219	0.011088
KIAA0895	-0.146276	5.09019	-4.08507	0.000895108	0.020326	1.06553	-3.32158	0.011088
AUH	-0.164806	8.1753	-3.55651	0.000896628	0.020326	-0.603305	-3.3211	0.011088
PPP4R3A	-0.119654	5.92662	-3.75497	0.000897328	0.020326	0.0250814	-3.32088	0.011088
NUFIP2	-0.164758	6.48272	-3.8409	0.000897567	0.020326	0.291353	-3.32081	0.011088
SERBP1	-0.208712	5.86009	-3.42357	0.000897582	0.020326	-0.855679	-3.32081	0.011088
TAF1A	-0.126826	3.21927	-3.4092	0.000904116	0.0204482	-1.07243	-3.31878	0.0111547
PTPN7	0.46633	0.478946	3.51896	0.00091086	0.0205749	-0.589204	3.3167	0.0112238
ZNF91	-0.129094	6.69002	-3.54031	0.000916022	0.0206656	-0.598722	-3.31512	0.0112732
TYW1B	0.186405	6.31524	3.41408	0.000918716	0.0207004	-0.894065	3.3143	0.0112922
GLRA1	0.344601	3.37538	3.43151	0.000919953	0.0207008	-0.707825	3.31393	0.0112924
ZNF677	-0.156778	4.09394	-3.41609	0.000921033	0.0207008	-0.781105	-3.3136	0.0112924
DNAJC28	-0.36086	2.11249	-3.68478	0.000924644	0.0207561	0.0508855	-3.31251	0.0113226
AC007114.1	0.256691	2.36213	3.40204	0.00092586	0.0207575	-0.910231	3.31214	0.0113233
RAB26	0.2194	3.49072	3.40125	0.000928293	0.0207861	-1.06418	3.3114	0.011339
TFG	-0.130002	6.54668	-3.67828	0.000932048	0.0208443	-0.243166	-3.31027	0.0113707
FKRP	0.207151	4.35198	3.43964	0.000935611	0.020898	-0.732825	3.30921	0.0114
MAP2K4	-0.138166	6.75416	-3.96527	0.000937851	0.0209221	0.628271	-3.30854	0.0114131
C7orf33	0.369697	1.8941	3.3975	0.000939902	0.0209419	-0.885486	3.30792	0.011424
AL031963.3	0.392972	0.723176	3.56384	0.000945762	0.0210464	-0.380629	3.30618	0.011481
RALGPS1	-0.161821	8.19133	-3.39758	0.000949184	0.0210751	-0.995685	-3.30517	0.0114966
AC007613.1	0.399732	0.516855	3.47456	0.000949393	0.0210751	-0.699471	3.30511	0.0114966
AC009501.3	0.310361	4.46608	3.43287	0.000951615	0.0210984	-0.756333	3.30445	0.0115093
USP7	-0.127462	5.77044	-3.86023	0.000956062	0.0211709	0.307073	-3.30315	0.0115489
AC007220.2	0.384019	0.554519	3.59818	0.000958323	0.0211743	-0.281822	3.30248	0.0115508
AL442128.2	0.246448	1.12329	3.8776	0.000958568	0.0211743	0.660619	3.30241	0.0115508
GPC6-AS2	0.481478	1.8856	3.45646	0.000963241	0.0212515	-0.62839	3.30105	0.0115928
SYCE1	0.456701	0.457797	3.69352	0.000968137	0.0213334	0.0260024	3.29963	0.0116375
TAF5L	-0.191796	3.83589	-3.71705	0.000970415	0.0213354	0.0814319	-3.29897	0.0116386
TRAM1	-0.17697	4.98295	-3.45648	0.000970928	0.0213354	-0.739856	-3.29882	0.0116386
RAVER2	-0.206236	3.75855	-3.38729	0.000972196	0.0213354	-1.21707	-3.29845	0.0116386
SPTB	0.835568	-0.532144	3.55275	0.000972969	0.0213354	-0.57549	3.29823	0.0116386
INTS6L	-0.209849	5.13127	-3.72191	0.000983003	0.0215046	-0.0524108	-3.29535	0.0117309
CNOT2	-0.107106	6.97759	-3.92796	0.000983371	0.0215046	0.474088	-3.29524	0.0117309
AC025031.1	0.356035	1.85498	3.70956	0.00098427	0.0215046	0.129947	3.29498	0.0117309
ANKRD46	-0.14809	5.04972	-3.52496	0.000986945	0.0215212	-0.562445	-3.29422	0.0117399
TNK2-AS1	-0.228626	-0.32733	-3.38259	0.000987418	0.0215212	-0.822094	-3.29409	0.0117399
STT3B	-0.16718	5.91819	-3.7478	0.00099441	0.0216418	0.0212661	-3.2921	0.0118058
USP3	-0.205248	5.97177	-3.86876	0.000995359	0.0216418	0.331458	-3.29184	0.0118058
AC005291.2	0.444253	1.24402	3.43949	0.00099886	0.0216918	-0.712116	3.29085	0.011833
CCDC125	0.156672	4.74725	3.42193	0.00100733	0.0218494	-0.816723	3.28847	0.011919
LINC01640	0.519925	1.16413	3.37562	0.00101039	0.0218893	-0.876389	3.28762	0.0119408
LINC01850	1.07299	-1.53418	4.35225	0.00101626	0.02199	1.91009	3.28599	0.0119957
NPRL3	0.149564	6.05192	3.40187	0.00102977	0.0221834	-0.936357	3.28226	0.0121012
UNC80	-0.177748	8.20451	-3.48064	0.0010302	0.0221834	-0.81812	-3.28215	0.0121012
AC005856.1	0.401522	3.02409	3.37164	0.00103182	0.0221834	-0.866877	3.2817	0.0121012
AC005476.2	0.345654	2.33102	3.6443	0.00103494	0.0221834	-0.0720288	3.28085	0.0121012
BX004807.1	0.434	1.6008	3.38794	0.00103515	0.0221834	-0.849441	3.28079	0.0121012
YBX1	-0.360029	7.10966	-3.36812	0.00103655	0.0221834	-1.05002	-3.28041	0.0121012
TNFRSF19	-0.249695	4.66929	-3.63396	0.00103777	0.0221834	-0.232152	-3.28008	0.0121012
LYPD6	-0.44317	4.74748	-4.14592	0.00103779	0.0221834	1.35082	-3.28008	0.0121012
AC020661.3	0.321837	2.909	3.45932	0.00103827	0.0221834	-0.617726	3.27995	0.0121012
AL645728.1	0.363164	1.60873	3.83086	0.00103909	0.0221834	0.51061	3.27972	0.0121012
SEC63	-0.148927	6.25353	-3.72625	0.0010401	0.0221834	-0.0675902	-3.27945	0.0121012
DDHD1	-0.152245	6.62801	-3.40748	0.0010401	0.0221834	-0.948326	-3.27945	0.0121012
ALG13-AS1	0.468189	3.30507	3.37199	0.00104121	0.0221834	-0.873533	3.27915	0.0121012
UBA5	-0.12924	4.69611	-3.82037	0.00104365	0.0222091	0.30788	-3.27849	0.0121152
ATXN7L3B	-0.247845	5.39497	-3.41083	0.00104656	0.0222446	-0.889504	-3.2777	0.0121346
BCLAF1	-0.167569	7.04811	-3.47339	0.00105073	0.0223069	-0.82527	-3.27658	0.0121686
AL357153.1	0.511743	1.52783	3.363	0.0010533	0.0223352	-0.941094	3.27589	0.012184
AC022613.2	0.396959	1.52045	3.68335	0.00105756	0.0223809	0.0326741	3.27475	0.0122089
AL137779.1	0.34769	1.19077	3.53865	0.00105884	0.0223809	-0.418544	3.27441	0.0122089
TMEM244	-0.166155	8.06981	-3.3613	0.00105919	0.0223809	-1.56852	-3.27431	0.0122089
CAPNS1	0.219441	4.59454	3.39	0.00106152	0.0223887	-0.885851	3.27369	0.0122132
AC068774.1	0.619601	3.76804	3.49539	0.00106204	0.0223887	-0.548269	3.27355	0.0122132
HSF4	0.506167	3.37814	3.67316	0.00106532	0.0224316	-0.045077	3.27268	0.0122366
KIRREL1	-0.503512	4.43129	-3.35895	0.00106741	0.0224493	-1.393	-3.27213	0.0122462
HOMEZ	-0.286564	3.02526	-3.4336	0.00107261	0.0225324	-0.697149	-3.27075	0.0122916
RAE1	-0.136667	4.39491	-4.23496	0.00107734	0.0226054	1.75337	-3.26951	0.0123314
FEM1B	-0.233403	3.85832	-3.44324	0.00108012	0.0226372	-0.724834	-3.26878	0.0123488
FAM106C	1.00405	0.540121	3.40871	0.0010818	0.0226461	-0.850126	3.26834	0.0123536
KIF3A	-0.091265	7.28636	-3.97927	0.00108334	0.022652	0.703779	-3.26794	0.0123568
AL360227.1	0.666377	-0.743326	3.74238	0.00109053	0.0227759	-0.0726382	3.26606	0.0124244
HCG25	0.296302	3.45177	3.43302	0.00109422	0.0228059	-0.711203	3.26511	0.0124408
LYZL4	1.33742	1.37895	3.55839	0.00109661	0.0228059	-0.367173	3.26449	0.0124408
AC015849.3	0.300587	5.29844	3.55123	0.00109693	0.0228059	-0.54743	3.26441	0.0124408
BARD1	-0.468614	3.56306	-4.6337	0.00109703	0.0228059	3.15921	-3.26438	0.0124408
TGFB1	0.271078	5.22654	3.68754	0.00109933	0.0228272	-0.143394	3.26379	0.0124524
CTNNBL1	-0.12053	5.15363	-4.14306	0.00110857	0.0229772	1.3021	-3.26142	0.0125342
PTAFR	0.426334	1.2214	3.36972	0.0011091	0.0229772	-0.930026	3.26128	0.0125342
RNGTT	-0.145403	7.61593	-3.68572	0.00111296	0.0230306	-0.278542	-3.2603	0.0125633
ELAVL3	0.842645	1.39902	3.49449	0.00111586	0.0230641	-0.512861	3.25956	0.0125816
AC005884.1	0.306533	3.14052	3.44425	0.00112685	0.0232259	-0.674169	3.25678	0.0126699
NEFL	1.01849	3.67761	3.49929	0.00112688	0.0232259	-0.566835	3.25677	0.0126699
POFUT2	-0.177209	4.00502	-3.46694	0.00112857	0.0232259	-0.671913	-3.25634	0.0126699
GNAQ	1.24972	2.07578	3.43269	0.00112918	0.0232259	-0.693735	3.25619	0.0126699
LINC02449	0.374309	-0.23677	3.8113	0.00113014	0.0232259	0.349187	3.25595	0.0126699
TNFSF12	0.759827	-0.627158	3.55572	0.0011322	0.0232416	-0.513869	3.25543	0.0126785
TEX52	0.388298	2.10399	3.36769	0.00113555	0.023251	-0.878254	3.25459	0.0126836
PDE12	-0.197369	3.75029	-3.40657	0.00113649	0.023251	-0.805794	-3.25436	0.0126836
AC005480.1	0.175147	5.88041	3.39247	0.00113652	0.023251	-0.96777	3.25435	0.0126836
NKAPD1	-0.20817	5.08227	-3.37119	0.00114006	0.0232968	-0.981873	-3.25347	0.0127085
AC106818.2	0.320669	4.46761	3.35874	0.00114242	0.0233185	-0.96595	3.25288	0.0127204
CHMP1B	-0.327819	3.18337	-3.34842	0.0011451	0.0233469	-0.935835	-3.25221	0.0127359
MBIP	-0.0939469	4.84534	-3.337	0.00114707	0.0233605	-1.46312	-3.25173	0.0127433
RP9	-0.192885	4.12179	-3.51844	0.00114974	0.0233742	-0.531668	-3.25106	0.0127508
ZNF772	-0.219272	3.21365	-3.40101	0.00115144	0.0233742	-0.801824	-3.25064	0.0127508
STX1B	0.820158	0.5834	3.48856	0.00115522	0.0233742	-0.59713	3.24971	0.0127508
SERHL2	0.37774	2.8087	3.90381	0.00115572	0.0233742	0.732668	3.24959	0.0127508
MZF1-AS1	0.235989	4.35093	3.64949	0.00115645	0.0233742	-0.189877	3.24941	0.0127508
HNRNPH3	-0.147686	6.69389	-3.9805	0.00115708	0.0233742	0.71957	-3.24925	0.0127508
ZBTB6	-0.288444	3.23327	-3.48646	0.00115753	0.0233742	-0.563346	-3.24914	0.0127508
UBE2QL1	-0.209356	7.20538	-3.74482	0.00115813	0.0233742	-0.137552	-3.249	0.0127508
CYB5R3	0.220746	3.90333	3.53972	0.00115958	0.0233774	-0.45378	3.24864	0.0127525
WDR33	-0.124127	7.15113	-3.3893	0.00116501	0.0234339	-1.03275	-3.24731	0.0127834
AC007216.2	0.77099	1.29239	3.43898	0.00116594	0.0234339	-0.710051	3.24708	0.0127834
GPR135	-0.293058	3.24253	-3.7885	0.00116629	0.0234339	0.254341	-3.247	0.0127834
MAP1A	0.693118	3.17856	3.45387	0.00116948	0.0234639	-0.663687	3.24622	0.0127997
AC112196.1	0.357581	4.47095	3.55821	0.00117172	0.0234639	-0.48478	3.24568	0.0127997
GSDME	0.813707	1.14167	3.37842	0.00117219	0.0234639	-0.906501	3.24556	0.0127997
PRPH	1.39389	0.0802611	3.66024	0.001173	0.0234639	-0.0448212	3.24537	0.0127997
CNBP	-0.221341	6.22172	-3.33034	0.00117662	0.0234789	-1.13103	-3.24449	0.0128079
NEUROD1	-0.380922	7.42459	-3.36364	0.00117845	0.0234789	-1.11597	-3.24405	0.0128079
SOCS6	-0.141674	3.85294	-3.32858	0.00117907	0.0234789	-1.38694	-3.24389	0.0128079
NOTCH2	-0.148988	5.59454	-3.32831	0.00118011	0.0234789	-1.5572	-3.24364	0.0128079
AL355613.1	0.547767	-0.485055	3.33008	0.00118027	0.0234789	-1.30416	3.24361	0.0128079
UPP2	-0.244771	4.92575	-3.32775	0.00118228	0.0234929	-1.51314	-3.24312	0.0128155
FAM122A	-0.372269	2.75861	-3.35402	0.00118636	0.0235242	-0.913079	-3.24214	0.0128326
ZNF180	-0.110173	3.32528	-3.32667	0.00118647	0.0235242	-1.33973	-3.24211	0.0128326
ZNF891	-0.18955	4.88312	-3.74366	0.00118826	0.0235339	0.0763002	-3.24168	0.0128379
SRGAP2B	0.863022	0.370509	3.571	0.00119329	0.0235703	-0.386723	3.24048	0.0128578
AC105411.1	0.281511	2.79666	4.39019	0.00119358	0.0235703	2.37676	3.24041	0.0128578
AC125437.3	0.488391	1.37923	3.32648	0.00119403	0.0235703	-1.03897	3.2403	0.0128578
AC010547.3	0.347999	1.79313	3.40886	0.00119667	0.0235966	-0.766827	3.23967	0.0128721
AC020978.3	0.388444	1.70712	3.48912	0.00120021	0.0236238	-0.527427	3.23883	0.0128869
RCAN3AS	0.229222	3.30808	3.32259	0.00120236	0.0236238	-1.274	3.23832	0.0128869
FSIP2	0.312	4.2825	3.32337	0.00120329	0.0236238	-1.05236	3.2381	0.0128869
ENO1-AS1	0.48142	0.478458	3.83253	0.00120436	0.0236238	0.403234	3.23785	0.0128869
AL355073.2	-0.437917	-0.119318	-3.72049	0.00120461	0.0236238	0.0119976	-3.23779	0.0128869
AC024267.3	0.490139	-0.68272	3.47484	0.00120649	0.0236348	-0.870556	3.23734	0.0128929
YES1	-0.115005	5.12373	-3.31894	0.00121675	0.0237832	-1.54159	-3.23492	0.0129739
ZCWPW1	0.268226	2.63408	3.58663	0.00121709	0.0237832	-0.247776	3.23484	0.0129739
BTBD3	-0.146079	6.68418	-3.50285	0.00121924	0.0237832	-0.754007	-3.23434	0.0129739
PCF11	-0.165645	5.83246	-3.55579	0.00121935	0.0237832	-0.535015	-3.23432	0.0129739
SLC27A5	0.215134	3.38933	3.45984	0.00122154	0.0238003	-0.661767	3.2338	0.0129832
SGPP2	0.53065	2.52355	3.31579	0.00122932	0.0239066	-1.16343	3.23199	0.0130412
NUCKS1	-0.144202	7.40828	-3.3235	0.00123021	0.0239066	-1.20289	-3.23178	0.0130412
SMC4	-0.173897	5.03363	-3.46906	0.00123186	0.0239066	-0.751341	-3.2314	0.0130412
PSMG1	-0.318845	3.08987	-3.33581	0.00123231	0.0239066	-0.97065	-3.23129	0.0130412
LINC02777	0.645609	-0.593883	3.31354	0.00123837	0.023974	-1.01523	3.22989	0.013078
PYGO1	-0.17654	4.24171	-3.7041	0.00123845	0.023974	-0.0762375	-3.22987	0.013078
NR4A1	0.663146	3.17917	3.57145	0.00124221	0.0240209	-0.351065	3.22901	0.0131035
SUMF2	0.196392	3.62389	3.44215	0.00124945	0.0241169	-0.729351	3.22735	0.0131559
SCAT1	0.630269	5.41812	3.69049	0.00124985	0.0241169	-0.201908	3.22725	0.0131559
TMEM9B-AS1	-0.266702	3.31585	-3.31015	0.00125211	0.0241347	-1.40152	-3.22674	0.0131656
KLHL13	0.399788	3.50306	5.06962	0.00125677	0.0241986	4.91765	3.22567	0.0132005
ARHGAP26-AS1	0.271377	4.32924	3.72201	0.00126289	0.0242679	-0.0202006	3.22428	0.0132383
NEFH	0.757435	1.91269	3.44405	0.00126426	0.0242679	-0.656824	3.22397	0.0132383
SWI5	0.115247	4.73703	3.30714	0.00126442	0.0242679	-1.51833	3.22394	0.0132383
ZNF574	0.163679	3.27319	3.30671	0.00126617	0.0242757	-1.31426	3.22354	0.0132426
TRAC	-0.321952	5.27397	-3.31439	0.00126812	0.0242801	-1.14572	-3.2231	0.013245
COPS2	-0.133701	5.13122	-3.47068	0.0012691	0.0242801	-0.731067	-3.22288	0.013245
AC012370.2	0.690145	2.42145	3.30558	0.00127087	0.0242881	-1.1533	3.22248	0.0132493
LINC00513	0.313899	6.86898	3.40284	0.0012763	0.0243467	-0.993748	3.22126	0.0132813
TUBB3	0.602045	4.3143	3.45602	0.00127664	0.0243467	-0.737343	3.22118	0.0132813
TCF4-AS1	0.397823	3.76177	3.34021	0.00127873	0.0243501	-0.993182	3.22071	0.0132831
AC005332.6	-0.212482	3.09293	-3.43891	0.00127952	0.0243501	-0.709272	-3.22053	0.0132831
IFT57	-0.117862	6.33282	-3.81157	0.00128106	0.0243536	0.080631	-3.22019	0.0132851
TFAM	-0.227316	4.16413	-3.38165	0.00128597	0.0244213	-0.910437	-3.21909	0.013322
PPM1A	-0.177728	6.82641	-3.40727	0.00128899	0.0244415	-1.00033	-3.21842	0.013333
SPTSSA	-0.343067	3.78625	-3.30822	0.00128976	0.0244415	-1.07651	-3.21825	0.013333
NOP53-AS1	0.420033	1.74945	3.43076	0.00129833	0.0245599	-0.695484	3.21635	0.0133976
TET3	-0.207299	5.97199	-3.64219	0.00129873	0.0245599	-0.377277	-3.21626	0.0133976
AC009137.1	0.306098	2.78923	3.4685	0.00130134	0.0245835	-0.595248	3.21568	0.0134105
AHCYL1	-0.168645	6.29725	-3.35675	0.00130366	0.0246014	-1.10378	-3.21517	0.0134203
TTPAL	0.1507	3.04757	3.29719	0.00130595	0.0246189	-1.3185	3.21467	0.0134298
MPP2	0.665133	0.661745	3.32208	0.001309	0.02464	-1.09293	3.214	0.0134413
N4BP2	-0.142268	5.74088	-3.79616	0.00130981	0.02464	0.0789238	-3.21382	0.0134413
TTC21B	-0.139143	6.34983	-3.48341	0.00131248	0.0246601	-0.797871	-3.21324	0.0134522
SUPT20H	-0.110963	5.93731	-3.51335	0.00131382	0.0246601	-0.705238	-3.21294	0.0134522
AC087392.2	0.557628	1.24907	3.39729	0.00131499	0.0246601	-0.817003	3.21269	0.0134522
VSNL1	0.866262	1.84433	3.45906	0.00131846	0.0246995	-0.614408	3.21193	0.0134737
AC100763.1	0.384913	4.80883	3.35827	0.00132097	0.0247161	-1.00661	3.21138	0.0134828
SMAD2	-0.143015	7.8755	-3.45788	0.00132331	0.0247161	-0.943209	-3.21088	0.0134828
ZNF570	-0.223451	2.50698	-3.54638	0.00132346	0.0247161	-0.370048	-3.21084	0.0134828
CNBD1	-0.333221	0.414355	-3.29173	0.00132927	0.0247988	-1.13026	-3.20958	0.0135279
AL445248.1	0.265392	3.78268	3.58799	0.00133311	0.0248209	-0.359685	3.20876	0.01354
MRPL37	-0.153998	3.57002	-3.59029	0.00133321	0.0248209	-0.296111	-3.20873	0.01354
CLTRN	0.254525	0.411382	3.29031	0.00133541	0.0248225	-1.09	3.20826	0.0135408
FILIP1L	0.359151	6.56033	3.33818	0.00133605	0.0248225	-1.15421	3.20812	0.0135408
AC007938.3	-0.32774	1.49865	-3.58779	0.00134018	0.0248722	-0.250111	-3.20723	0.0135679
SAXO2	-0.216975	4.7372	-3.36317	0.00134293	0.0248722	-1.00631	-3.20664	0.0135679
TNFAIP8L1	0.35367	1.26723	3.38363	0.00134399	0.0248722	-0.864735	3.20642	0.0135679
IMPAD1	-0.156084	4.72606	-3.47846	0.00134426	0.0248722	-0.711574	-3.20636	0.0135679
ZSCAN25	-0.124702	2.94899	-3.28747	0.00134776	0.0248741	-1.40394	-3.20561	0.013569
AP003071.2	0.658692	2.08219	4.75093	0.00134817	0.0248741	3.70764	3.20552	0.013569
CHD7	-0.133912	8.51781	-3.38686	0.00134927	0.0248741	-1.13284	-3.20529	0.013569
AC093523.1	-0.512386	1.94581	-3.31306	0.00134988	0.0248741	-1.03238	-3.20516	0.013569
LMTK3	0.473633	6.91166	3.94601	0.0013543	0.02493	0.551732	3.20422	0.0135995
KIAA2026	-0.133695	6.98615	-3.58387	0.00135908	0.0249753	-0.529476	-3.2032	0.0136242
AC005387.2	0.387865	0.626409	3.34926	0.00135954	0.0249753	-1.00229	3.20311	0.0136242
AL139022.1	0.449825	3.77976	3.56953	0.00136524	0.0250536	-0.385234	3.2019	0.0136669
ARL4C	0.708671	1.28824	3.39149	0.00136659	0.0250536	-0.822138	3.20162	0.0136669
SNAI3	0.259381	1.58936	3.28282	0.00136819	0.0250574	-1.17857	3.20128	0.013669
RAP1A	-0.131569	5.98877	-3.93436	0.00137021	0.0250689	0.471954	-3.20085	0.0136753
UBE2E3	-0.134813	6.86246	-3.56754	0.00137181	0.0250728	-0.654209	-3.20052	0.0136774
CIB1	-0.406825	3.03519	-3.2844	0.00137348	0.0250779	-1.10865	-3.20017	0.0136802
ST6GALNAC3	-0.748753	-0.0530892	-3.28042	0.00137884	0.0251487	-1.13885	-3.19904	0.0137188
PLEKHA8	-0.178473	5.70203	-3.74752	0.00138015	0.0251487	-0.128688	-3.19877	0.0137188
PCOLCE2	0.65053	3.56821	3.38483	0.00138262	0.0251682	-0.868827	3.19825	0.0137294
SHB	-0.345418	2.90496	-3.41706	0.0013851	0.0251878	-0.747423	-3.19774	0.0137401
PNMA8B	0.608844	0.327728	3.44033	0.00138927	0.0252381	-0.717612	3.19687	0.0137676
KIAA0100	-0.12891	4.7342	-3.54935	0.00139177	0.0252538	-0.560968	-3.19635	0.0137761
VLDLR-AS1	-0.253531	6.55467	-3.50551	0.00139453	0.0252538	-0.722153	-3.19578	0.0137761
CFAP100	0.268962	4.80557	3.27682	0.00139499	0.0252538	-1.59626	3.19569	0.0137761
PAPSS1	-0.118429	5.79847	-3.76417	0.00139574	0.0252538	0.00388312	-3.19553	0.0137761
AC015922.3	-0.521572	-0.0567615	-3.28132	0.00140239	0.0253486	-1.32709	-3.19416	0.0138278
MAPK12	0.522509	-0.606678	3.70882	0.00140422	0.0253562	0.0718143	3.19378	0.013832
UBQLN1	-0.124638	5.64834	-3.77958	0.00140574	0.0253582	0.091334	-3.19347	0.0138331
SDC4	-0.2594	5.17015	-3.27678	0.00142108	0.0255983	-1.23557	-3.19034	0.0139641
CPNE9	0.482123	-0.147743	3.39283	0.00142189	0.0255983	-0.970634	3.19017	0.0139641
MTMR10	-0.131501	5.45013	-3.38608	0.00142402	0.0256106	-1.00579	-3.18974	0.0139708
TIMM21	-0.161583	3.98521	-3.78961	0.00142565	0.0256106	0.215474	-3.18941	0.0139708
IGF2BP2-AS1	0.285519	4.49193	3.72889	0.00142684	0.0256106	0.0229658	3.18917	0.0139708
PAQR9	-0.371804	3.8073	-3.27595	0.00143202	0.0256779	-1.16239	-3.18812	0.0140075
PDGFA	0.790347	-0.597372	3.38741	0.00143634	0.0257202	-1.02317	3.18725	0.0140305
MDC1-AS1	0.268643	3.88538	3.61679	0.00144064	0.0257202	-0.239667	3.18638	0.0140305
SUCLG1	-0.129119	5.3986	-3.42613	0.00144096	0.0257202	-0.889499	-3.18632	0.0140305
NAA50	-0.0912814	5.39301	-3.26677	0.00144097	0.0257202	-1.71507	-3.18632	0.0140305
RIF1	-0.153877	6.44032	-3.64835	0.00144271	0.0257202	-0.412001	-3.18597	0.0140305
GLS	-0.12707	8.1422	-3.72061	0.00144472	0.0257202	-0.378485	-3.18557	0.0140305
MIR133A1HG	0.421266	0.722934	3.35902	0.00144554	0.0257202	-0.941026	3.1854	0.0140305
ALDOC	-0.373529	7.30532	-3.26915	0.0014458	0.0257202	-1.34886	-3.18535	0.0140305
SLC24A1	-0.170583	8.58374	-3.2762	0.00144895	0.0257506	-1.38129	-3.18472	0.0140471
AL390774.2	0.428716	3.52986	3.26627	0.00145131	0.0257671	-1.179	3.18425	0.0140561
LINC00667	-0.204708	4.87721	-3.31118	0.00145889	0.0258762	-1.1542	-3.18274	0.0141157
AC000068.1	-0.357252	1.29458	-3.2631	0.00146246	0.025907	-1.21758	-3.18203	0.0141325
AC069228.1	0.431843	8.86012	3.28222	0.0014635	0.025907	-1.37856	3.18182	0.0141325
RBM26	-0.104605	7.30202	-3.51492	0.00146738	0.0259271	-0.777362	-3.18106	0.0141434
RANBP6	-0.286079	4.10267	-3.64663	0.00146805	0.0259271	-0.189352	-3.18093	0.0141434
EMC3	0.162335	5.70371	3.50412	0.00146998	0.0259271	-0.748955	3.18054	0.0141434
SOCS5	-0.366795	2.18965	-3.33017	0.0014704	0.0259271	-0.975869	-3.18046	0.0141434
AC093879.1	0.715126	2.31031	3.3371	0.00147368	0.0259596	-0.957101	3.17982	0.0141612
AC034139.1	0.241004	3.37302	3.6526	0.00147525	0.0259619	-0.168716	3.17951	0.0141624
AC005154.4	0.341032	1.40436	3.46606	0.00147924	0.0259889	-0.598611	3.17873	0.0141771
MKS1	0.160914	3.77562	3.58768	0.00147971	0.0259889	-0.333972	3.17863	0.0141771
FEZ1	0.318219	4.26871	3.37368	0.00148304	0.0259889	-0.968039	3.17798	0.0141771
SLC35E2A	0.164279	4.30313	3.25776	0.00148341	0.0259889	-1.62553	3.17791	0.0141771
AC104699.1	0.284442	1.65333	3.51214	0.00148401	0.0259889	-0.465418	3.17779	0.0141771
HHIPL1	-0.699889	1.90725	-3.27255	0.00148783	0.0260305	-1.14235	-3.17705	0.0141998
MYOT	0.32849	2.62093	3.41211	0.00149351	0.0260821	-0.752032	3.17594	0.0142279
RNF144A-AS1	-0.232081	0.207304	-3.25562	0.00149367	0.0260821	-1.20481	-3.17591	0.0142279
MBOAT2	-0.220006	4.70543	-4.27525	0.00149979	0.0261615	1.68468	-3.17472	0.0142713
THY1	0.921746	2.50533	3.47229	0.00150113	0.0261615	-0.599872	3.17447	0.0142713
BCL2L2-PABPN1	-0.221208	2.72473	-3.45298	0.00150469	0.0261982	-0.652183	-3.17378	0.0142913
AC008555.2	-0.411834	3.3999	-4.04706	0.00151425	0.0263391	1.12016	-3.17194	0.0143682
METTL14	-0.101465	5.58857	-3.64838	0.00151652	0.0263533	-0.316452	-3.1715	0.0143759
ZNF493	-0.161262	4.67765	-3.41783	0.00151921	0.0263683	-0.858088	-3.17099	0.0143841
CPEB2	-0.17869	5.94147	-3.60417	0.00152035	0.0263683	-0.527033	-3.17077	0.0143841
MAP3K14	0.26559	3.74225	3.28241	0.00152229	0.0263683	-1.15439	3.1704	0.0143841
ZNF543	-0.281964	2.02662	-3.30421	0.00152514	0.0263683	-1.04959	-3.16986	0.0143841
GMPS	-0.127321	4.3816	-4.01867	0.0015257	0.0263683	0.919544	-3.16975	0.0143841
RNF2	-0.187346	5.04841	-4.17409	0.00152618	0.0263683	1.47541	-3.16966	0.0143841
WASHC5-AS1	0.573013	-0.265767	3.25009	0.00153726	0.0265343	-1.43888	3.16756	0.0144746
SLC25A37	-0.207521	5.94711	-3.25717	0.0015436	0.0265981	-1.33791	-3.16636	0.0145095
AC092068.2	0.470563	-0.426235	3.33222	0.00154391	0.0265981	-1.16396	3.1663	0.0145095
QSOX2	-0.177512	3.69149	-3.96315	0.00154766	0.0266316	0.836108	-3.16559	0.0145277
Z69666.1	0.418182	0.504312	3.3737	0.00154974	0.0266316	-0.90482	3.1652	0.0145277
ARHGAP4	0.289821	1.8656	3.75633	0.0015527	0.0266316	0.241652	3.16465	0.0145277
HSPH1	0.586589	4.62244	3.2513	0.00155278	0.0266316	-1.29488	3.16463	0.0145277
SATB1-AS1	-0.286479	3.37727	-3.55241	0.00155325	0.0266316	-0.460592	-3.16455	0.0145277
LIX1L-AS1	0.239975	3.66942	3.3772	0.00156109	0.0267406	-0.90146	3.16308	0.0145872
AL359715.1	-0.381216	0.97456	-4.24284	0.00156503	0.0267624	1.87043	-3.16235	0.014599
AC108449.1	0.466878	4.38718	3.30185	0.00156534	0.0267624	-1.15169	3.16229	0.014599
GLIS2-AS1	0.490062	2.47416	3.48394	0.00156979	0.0268059	-0.550344	3.16146	0.0146228
ZNF112	-0.163605	3.60526	-3.55725	0.00157086	0.0268059	-0.404803	-3.16126	0.0146228
C22orf23	0.196743	1.1048	3.23942	0.00157343	0.0268228	-1.26386	3.16079	0.014632
AC245060.5	-0.52471	3.76016	-3.40125	0.00157483	0.0268228	-0.884268	-3.16053	0.014632
FBF1	0.18254	4.22154	3.3403	0.00157749	0.0268427	-1.04071	3.16004	0.0146429
VAT1L	0.566171	3.02936	3.34943	0.00158537	0.0269513	-0.943099	3.15858	0.0147021
HJV	0.654189	-1.61041	3.52679	0.0015942	0.0270758	-0.794817	3.15697	0.0147701
ASL	0.295425	3.99992	3.28135	0.001603	0.0271996	-1.17642	3.15536	0.0148376
AHR	0.475395	5.63269	3.25152	0.00160835	0.0272349	-1.34683	3.15439	0.0148568
PHF6	-0.0988204	5.04909	-3.56845	0.00160953	0.0272349	-0.53661	-3.15417	0.0148568
ATCAY	0.303397	3.89153	3.37322	0.00160998	0.0272349	-0.919626	3.15409	0.0148568
BX890604.2	0.348452	0.0780298	3.23194	0.00161154	0.0272349	-1.24054	3.15381	0.0148568
FAM131C	0.683012	-0.771149	3.31071	0.00161286	0.0272349	-1.24417	3.15357	0.0148568
AP002748.6	0.31066	4.33968	3.57726	0.00161416	0.0272349	-0.372708	3.15334	0.0148568
GON7	-0.204944	4.2472	-3.2569	0.00161644	0.0272464	-1.25508	-3.15292	0.0148631
CCDC43	-0.220296	3.72241	-3.23536	0.00161903	0.0272464	-1.27077	-3.15246	0.0148631
OPA3	0.188147	5.43841	3.24162	0.00161954	0.0272464	-1.35984	3.15236	0.0148631
YTHDF3	-0.119008	5.62694	-3.8599	0.00162089	0.0272464	0.173474	-3.15212	0.0148631
MTHFD1	0.172398	4.23151	3.22965	0.00162343	0.0272637	-1.68341	3.15166	0.0148725
DNAAF5	-0.148425	4.88804	-3.59143	0.00163002	0.0273237	-0.475449	-3.15048	0.0149053
ECHDC1	-0.128239	6.24026	-3.69566	0.00163004	0.0273237	-0.193934	-3.15048	0.0149053
PRKRA	-0.205102	6.56254	-4.12632	0.00163817	0.0274344	1.26	-3.14902	0.0149656
TFR2	0.359549	1.3137	3.57354	0.0016437	0.0275014	-0.298358	3.14804	0.0150022
FGF11	0.668885	1.09867	3.32503	0.0016464	0.0275097	-0.998793	3.14756	0.0150067
NEK7	-0.115489	7.9913	-3.77525	0.0016473	0.0275097	-0.173715	-3.1474	0.0150067
HFE	0.471434	-0.889814	3.22455	0.00165011	0.0275097	-1.263	3.1469	0.0150067
EMC8	-0.176346	4.13371	-3.24484	0.00165031	0.0275097	-1.27761	-3.14687	0.0150067
ELOVL4	-0.170509	8.354	-3.23003	0.00165706	0.0275727	-1.51046	-3.14567	0.0150411
UTP23	-0.227759	5.07138	-3.65809	0.00165715	0.0275727	-0.180991	-3.14566	0.0150411
MIER3	-0.147452	4.50187	-3.61215	0.00166263	0.0276331	-0.345116	-3.14469	0.015074
AGPAT3	-0.131273	8.15596	-3.22493	0.00166444	0.0276331	-1.50584	-3.14437	0.015074
STS	0.383196	3.29654	3.52912	0.00166538	0.0276331	-0.459462	3.14421	0.015074
JOSD1	0.100204	3.86434	3.22134	0.00166712	0.0276364	-1.67574	3.1439	0.0150759
AP002961.1	0.32875	3.57816	3.22077	0.00167459	0.0276985	-1.30791	3.14259	0.0151097
MRPL50	-0.334273	3.79742	-3.24585	0.00167537	0.0276985	-1.26511	-3.14246	0.0151097
UPB1	0.461986	0.114049	3.68557	0.00167548	0.0276985	0.0612113	3.14244	0.0151097
GCAT	0.663884	-0.368952	3.35476	0.00168203	0.0277812	-1.02962	3.14129	0.0151549
TARDBP	-0.144384	5.70819	-3.28922	0.00168839	0.0278608	-1.28358	-3.14019	0.0151983
USP38	-0.164403	4.23839	-3.89095	0.00169342	0.0279182	0.593525	-3.13932	0.0152296
FBXO22	-0.157833	7.45858	-3.51563	0.00169978	0.0279693	-0.74501	-3.13822	0.0152574
AC092835.1	-0.16054	3.8962	-3.58132	0.00170003	0.0279693	-0.435292	-3.13818	0.0152574
EFCAB2	0.368897	6.33304	4.13733	0.00170167	0.0279693	1.14115	3.13789	0.0152574
ARHGAP30	0.320265	2.09228	3.66968	0.00170273	0.0279693	-0.0244336	3.13771	0.0152574
SHISAL1	-0.587996	1.86421	-3.44311	0.00170789	0.0280284	-0.659674	-3.13682	0.0152897
COX19	-0.136356	4.19383	-3.27752	0.00171328	0.0280768	-1.20433	-3.1359	0.0153161
PLK3	0.588409	-0.668057	3.38242	0.00171396	0.0280768	-0.909487	3.13578	0.0153161
DPF1	0.265059	1.24983	3.66363	0.00172244	0.0281899	-0.00634241	3.13434	0.0153778
TUBA1A	0.411199	6.72195	3.27068	0.001724	0.0281899	-1.37958	3.13407	0.0153778
AC114930.1	1.07558	-0.193787	3.28923	0.0017278	0.0282265	-1.28282	3.13342	0.0153978
SSBP4	0.276022	4.0792	3.39868	0.00173293	0.0282846	-0.902849	3.13255	0.0154295
IRX2	0.991085	-1.42091	3.3513	0.0017352	0.0282959	-1.14225	3.13217	0.0154356
ST6GALNAC1	0.310038	3.3139	3.20796	0.00173977	0.0283317	-1.60267	3.1314	0.0154551
NDST1	-0.220898	5.438	-3.22724	0.00174128	0.0283317	-1.4039	-3.13114	0.0154551
AGAP2-AS1	-0.488016	0.34601	-3.21989	0.00174211	0.0283317	-1.40222	-3.131	0.0154551
ODF2	0.202919	4.42376	3.23777	0.00174622	0.0283424	-1.31905	3.13031	0.015461
MAML2	-0.298828	7.84306	-3.53817	0.00174728	0.0283424	-0.801517	-3.13013	0.015461
MED30	-0.182858	3.6598	-3.22594	0.00174749	0.0283424	-1.30071	-3.1301	0.015461
LMF1-AS1	0.499618	-0.0235878	3.23811	0.00175293	0.0284051	-1.38766	3.12918	0.0154952
MRPL19	-0.108329	5.6757	-3.23515	0.00175819	0.0284611	-1.41289	-3.1283	0.0155257
ASNSD1	-0.398258	3.79042	-3.21401	0.00175955	0.0284611	-1.34401	-3.12807	0.0155257
XPR1	-0.144976	6.48814	-3.72026	0.00176252	0.0284777	-0.243882	-3.12758	0.0155348
CEND1	0.830186	2.17344	3.29027	0.00176374	0.0284777	-1.08842	3.12738	0.0155348
ZNF155	-0.188698	4.29099	-3.78141	0.00176794	0.0284904	0.160088	-3.12668	0.0155417
SNAP23	0.17472	5.85215	3.20817	0.00176851	0.0284904	-1.46806	3.12658	0.0155417
AC020765.2	-0.508334	1.59425	-3.34233	0.00176931	0.0284904	-0.951271	-3.12645	0.0155417
USP1	-0.181668	5.93037	-3.27822	0.00177086	0.0284904	-1.32383	-3.12619	0.0155417
CSTF2T	-0.355551	3.04656	-3.21392	0.00177331	0.0284906	-1.3033	-3.12578	0.0155418
SRXN1	-0.35548	1.52122	-3.21854	0.0017746	0.0284906	-1.30063	-3.12557	0.0155418
AC092118.1	0.396955	5.38013	3.30656	0.00177562	0.0284906	-1.19162	3.1254	0.0155418
DARS-AS1	0.69023	3.01023	3.20007	0.00178398	0.0285993	-1.58026	3.12402	0.0156011
PIK3IP1	0.266556	3.51782	3.33909	0.00179672	0.028759	-1.01161	3.12193	0.0156882
KCTD19	0.343571	1.21999	3.1977	0.00179746	0.028759	-1.38787	3.12181	0.0156882
AC018462.1	0.365449	4.88747	3.29295	0.00180024	0.028759	-1.20378	3.12135	0.0156882
ARSK	-0.116215	3.53296	-3.1972	0.00180033	0.028759	-1.72706	-3.12134	0.0156882
AL353693.1	0.385913	1.34402	3.19783	0.00180434	0.0287975	-1.37152	3.12068	0.0157092
AC005520.2	0.240494	4.8017	3.19565	0.00180917	0.0288489	-1.83807	3.11989	0.0157373
PIGS	-0.234095	4.9571	-3.29612	0.00181898	0.0289798	-1.21759	-3.1183	0.0158087
2023-03-03	-0.187896	7.84322	-3.30509	0.00182586	0.0290435	-1.37435	-3.11719	0.0158434
ANKRD49	-0.27334	4.08591	-3.20746	0.00182621	0.0290435	-1.38047	-3.11713	0.0158434
ANKRD37	0.506	7.07877	3.63949	0.00183803	0.0292057	-0.529289	3.11523	0.0159319
C16orf46	0.201616	4.18819	3.22739	0.00184061	0.0292209	-1.33554	3.11481	0.0159402
CCDC51	-0.251385	2.81684	-3.20152	0.00184697	0.0292768	-1.32829	-3.1138	0.0159707
ZNF32	-0.23171	3.93454	-3.46412	0.00184739	0.0292768	-0.709751	-3.11373	0.0159707
FBXO2	0.615294	2.11486	3.21778	0.00186079	0.0294633	-1.27892	3.1116	0.0160724
AC025043.1	0.268779	3.57774	3.26887	0.00186955	0.029576	-1.19406	3.11021	0.0161339
TTN-AS1	-0.166114	6.23449	-3.31914	0.00188039	0.0297213	-1.27155	-3.1085	0.0162132
TRPC1	-0.240459	7.73837	-3.54436	0.00188374	0.0297288	-0.666181	-3.10798	0.0162173
AL591002.1	0.325047	2.71249	3.21495	0.00188416	0.0297288	-1.29675	3.10791	0.0162173
ZNF267	-0.126801	2.79911	-3.9721	0.00189413	0.02986	0.808422	-3.10635	0.0162888
LINC02606	0.542715	-0.193574	3.25499	0.00190109	0.0299434	-1.34115	3.10526	0.0163343
ABHD4	-0.221114	2.90624	-3.37382	0.00190803	0.0300265	-0.875421	-3.10419	0.0163797
SEZ6L2	0.174691	5.9724	3.32665	0.00191377	0.0300905	-1.21536	3.1033	0.0164146
NOMO1	0.186789	4.19191	3.24885	0.00191941	0.0301472	-1.28524	3.10243	0.0164455
THUMPD2	-0.12735	5.55562	-3.39779	0.00192073	0.0301472	-1.0313	-3.10222	0.0164455
HSPE1	0.413049	5.16268	3.17756	0.00192758	0.0302284	-1.5215	3.10117	0.0164898
STIL	0.257075	1.76195	3.21144	0.00193432	0.0303077	-1.30077	3.10014	0.0165331
OSCP1	0.139554	4.76693	3.20351	0.00193696	0.0303088	-1.44044	3.09973	0.0165337
CCDC146	-0.132517	8.16239	-3.35406	0.00193965	0.0303088	-1.26721	-3.09932	0.0165337
AC005695.2	0.317755	4.44297	3.45993	0.00194007	0.0303088	-0.749451	3.09926	0.0165337
IMPA1	-0.168699	4.0629	-3.24365	0.00194112	0.0303088	-1.30106	-3.0991	0.0165337
Z95331.1	-0.133326	2.55509	-3.17243	0.00194726	0.0303783	-1.68566	-3.09816	0.0165716
VASP	0.135053	3.77267	3.16943	0.00196577	0.0306091	-1.79691	3.09536	0.0166975
ABHD15-AS1	0.278999	4.68173	3.33564	0.00196606	0.0306091	-1.09925	3.09531	0.0166975
RINL	-0.233925	2.51567	-3.19217	0.00196716	0.0306091	-1.34837	-3.09515	0.0166975
NRN1	1.17544	1.20589	3.30081	0.00197194	0.0306552	-1.05515	3.09443	0.0167226
CNIH3	0.201681	3.93971	3.83181	0.00197353	0.0306552	0.347864	3.09419	0.0167226
CEBPG	-0.197046	3.44058	-3.2948	0.00197918	0.0307166	-1.1335	-3.09334	0.0167561
CLEC2L	0.792655	0.716059	3.36374	0.00199586	0.0309404	-0.890873	3.09085	0.0168782
KLF7	-0.583775	3.30434	-3.31786	0.00199822	0.0309404	-1.05312	-3.0905	0.0168782
TTC9C	0.1637	3.96825	3.32393	0.00199889	0.0309404	-1.09605	3.0904	0.0168782
RBM41	-0.122505	5.00362	-3.28564	0.00200233	0.0309404	-1.27326	-3.08989	0.0168782
AL022323.4	0.281125	5.46372	3.40789	0.00200235	0.0309404	-0.942201	3.08988	0.0168782
DNAJC27-AS1	0.210356	4.57427	4.38712	0.00200391	0.0309404	2.18704	3.08965	0.0168782
PIMREG	0.353101	0.926871	3.16247	0.00200944	0.0309539	-1.46392	3.08883	0.0168856
RAD21	-0.195178	6.29163	-3.21146	0.00200997	0.0309539	-1.5234	-3.08876	0.0168856
MBD2	-0.120813	5.44629	-3.46669	0.00201435	0.0309539	-0.866139	-3.08811	0.0168856
PTPRO	-0.330269	2.45618	-3.16151	0.0020155	0.0309539	-1.72428	-3.08794	0.0168856
FYTTD1	-0.116041	5.43559	-3.2402	0.00201589	0.0309539	-1.42067	-3.08788	0.0168856
SYT11	0.482905	3.16226	3.24925	0.00201672	0.0309539	-1.22986	3.08776	0.0168856
ANO3	1.22108	3.67372	3.37445	0.00201683	0.0309539	-0.916116	3.08774	0.0168856
AC073575.2	-0.49037	0.102389	-3.38446	0.00202017	0.0309788	-0.938276	-3.08725	0.0168992
GPR12	0.855472	0.491634	3.34068	0.00202667	0.0310428	-0.967487	3.0863	0.0169341
AMOT	0.497481	0.591636	3.28329	0.00202779	0.0310428	-1.14352	3.08613	0.0169341
NDUFA8	-0.255403	4.8012	-3.16134	0.00203595	0.0311412	-1.54085	-3.08494	0.0169877
LINC02035	-0.286858	2.16107	-3.32478	0.00203995	0.031176	-0.994262	-3.08435	0.0170067
APBB3	0.168076	2.91729	3.15733	0.00204224	0.0311844	-1.72375	3.08402	0.0170113
SNX13	-0.127387	6.78208	-3.33564	0.00204573	0.0311885	-1.29411	-3.08351	0.0170136
ABI1	-0.125911	5.23683	-3.15675	0.00204597	0.0311885	-2.02707	-3.08348	0.0170136
CHD1	-0.118211	6.86716	-3.54329	0.00205142	0.031245	-0.726926	-3.08269	0.0170444
SBNO2	0.254136	3.16171	3.1743	0.00205359	0.0312517	-1.41724	3.08237	0.017048
GNAT1	-0.316802	9.69211	-3.15552	0.00207192	0.0315041	-1.74435	-3.07972	0.0171857
SPDYE2	0.43785	5.32033	3.54749	0.00207415	0.0315113	-0.694919	3.0794	0.0171896
TXNL1	-0.0746575	6.80089	-3.1519	0.00207739	0.0315339	-2.13836	-3.07894	0.017202
SLAIN1	-0.235349	3.97799	-3.41988	0.00208067	0.0315571	-0.883228	-3.07847	0.0172146
FAM49A	0.588319	0.38023	3.28212	0.00208255	0.0315591	-1.15574	3.0782	0.0172157
FBXL12	0.147381	3.9671	3.75468	0.00209041	0.0316515	0.0932309	3.07708	0.0172661
SNX12	-0.158284	3.23603	-3.15208	0.00210536	0.0318512	-1.47118	-3.07495	0.017375
AC015845.2	-0.336346	1.04657	-3.33766	0.0021142	0.0319528	-0.955315	-3.0737	0.0174305
FERMT2	-0.105334	6.50549	-3.29023	0.00211564	0.0319528	-1.37385	-3.0735	0.0174305
RBM12	-0.263459	3.29322	-3.28571	0.00211931	0.0319814	-1.15984	-3.07298	0.0174461
WEE1	0.517345	1.62991	3.37489	0.00212441	0.0320316	-0.858981	3.07227	0.0174734
TBC1D23	-0.106095	6.03872	-3.51156	0.00212699	0.0320436	-0.771723	-3.0719	0.01748
TMEM101	-0.227734	2.78095	-3.16341	0.00213086	0.0320752	-1.43148	-3.07136	0.0174972
CCDC65	0.204105	5.56788	3.34873	0.00213757	0.0321493	-1.20212	3.07042	0.0175377
AHNAK2	0.804478	1.49299	3.42245	0.00214369	0.0322144	-0.71847	3.06957	0.0175732
USP28	-0.117893	6.04697	-3.14019	0.00215522	0.0323396	-2.13411	-3.06796	0.0176415
AC008938.1	0.542604	0.980011	3.26784	0.00215706	0.0323396	-1.17217	3.06771	0.0176415
DLAT	-0.118734	5.06423	-3.93107	0.00215741	0.0323396	0.512836	-3.06766	0.0176415
SMTN	-0.477318	4.40953	-3.18453	0.00216336	0.0324018	-1.48195	-3.06684	0.0176754
ZBTB32	0.365718	2.13052	3.49929	0.00217222	0.0325074	-0.506203	3.06562	0.017733
UBN2	-0.106298	6.66962	-3.3393	0.00218841	0.0326767	-1.2962	-3.0634	0.0178254
AC005052.2	0.275579	3.31593	4.61149	0.00218888	0.0326767	3.12179	3.06333	0.0178254
ZNF473	0.191028	3.42699	3.23537	0.00219056	0.0326767	-1.29516	3.0631	0.0178254
SLC16A1	-0.193257	7.65095	-3.18741	0.00219175	0.0326767	-1.65441	-3.06294	0.0178254
MYSM1	-0.106818	5.97154	-3.57324	0.0021926	0.0326767	-0.556777	-3.06282	0.0178254
AC139530.3	-0.269354	0.0875131	-3.13429	0.00219542	0.0326905	-1.545	-3.06244	0.0178329
AC016747.2	0.37339	1.50587	3.21323	0.00219905	0.0326905	-1.29619	3.06194	0.0178329
SPDYE3	0.260582	5.25998	3.40316	0.00220371	0.0326905	-1.0156	3.06131	0.0178329
KIF11	0.310464	1.31304	3.15258	0.00220373	0.0326905	-1.47313	3.06131	0.0178329
TRMT10C	-0.369438	3.70032	-3.29271	0.00220396	0.0326905	-1.1771	-3.06128	0.0178329
TAX1BP1	-0.109544	7.59023	-3.34848	0.00220442	0.0326905	-1.29978	-3.06121	0.0178329
PPFIBP2	-0.383172	4.19198	-3.59668	0.00220955	0.0327348	-0.435317	-3.06052	0.017857
TWF1	-0.160616	4.1884	-3.24484	0.00221266	0.0327348	-1.33038	-3.0601	0.017857
ATP6V1B2	-0.153264	6.59365	-3.17686	0.00221287	0.0327348	-1.63592	-3.06007	0.017857
OAT	0.178137	4.65144	3.19818	0.00221729	0.0327732	-1.47303	3.05947	0.017878
2023-03-02	0.25813	3.34321	3.4233	0.00222143	0.0328076	-0.79591	3.05891	0.0178968
CAND1	-0.072385	6.49422	-3.7361	0.00222756	0.0328712	-0.307105	-3.05808	0.0179315
ACVR2B	-0.132608	4.89459	-3.12908	0.00223154	0.0329029	-2.09558	-3.05755	0.0179488
AL022322.2	0.337232	1.84939	3.46645	0.00223608	0.0329428	-0.5938	3.05694	0.0179705
WDR88	0.240413	3.37324	3.91933	0.00223818	0.0329459	0.694454	3.05666	0.0179722
ZNF148	-0.094962	7.46348	-3.12787	0.00224004	0.0329459	-2.23745	-3.05641	0.0179722
AP005131.1	0.532653	4.09876	3.14222	0.00224178	0.0329459	-1.55792	3.05618	0.0179722
TPP2	-0.158315	6.49322	-3.24514	0.00224398	0.0329514	-1.49207	-3.05588	0.0179752
SPATA1	0.280307	6.10131	3.29992	0.00224655	0.0329622	-1.31518	3.05554	0.0179811
TMTC3	-0.164092	5.72047	-3.61339	0.00225073	0.032983	-0.506643	-3.05498	0.0179925
DHX9	-0.121986	6.80468	-3.29884	0.00225163	0.032983	-1.42435	-3.05486	0.0179925
SLC7A8	0.692394	2.37847	4.11208	0.0022536	0.032985	1.42007	3.0546	0.0179935
IFNAR1	-0.149043	5.33668	-3.24098	0.00226082	0.0330526	-1.42925	-3.05364	0.0180304
CD4	0.621839	2.33268	3.71167	0.00226189	0.0330526	0.082973	3.0535	0.0180304
YBEY	0.146918	4.33117	3.89947	0.00226652	0.0330934	0.461656	3.05289	0.0180527
FAM126B	-0.112383	6.09447	-3.37112	0.00227057	0.0331155	-1.21952	-3.05235	0.0180647
LRP4	-0.31663	4.53838	-3.89143	0.00227171	0.0331155	0.335353	-3.0522	0.0180647
RIDA	-0.231525	3.3886	-3.16444	0.0022743	0.0331265	-1.46804	-3.05186	0.0180707
ZNF830	-0.326497	3.86522	-3.27865	0.00228312	0.033228	-1.23735	-3.0507	0.0181261
ENTPD3-AS1	0.169315	5.68066	3.35986	0.00228623	0.0332403	-1.19863	3.05029	0.0181328
RNASEL	0.332358	2.25444	3.81246	0.0022877	0.0332403	0.425225	3.05009	0.0181328
ZNF444	-0.151271	3.91436	-3.15633	0.00228951	0.0332403	-1.51659	-3.04986	0.0181328
TOPORS	-0.235327	3.95486	-3.20739	0.002296	0.0333078	-1.40036	-3.04901	0.0181696
CAV2	0.742354	2.36925	3.33957	0.00230461	0.0333874	-0.986066	3.04788	0.018213
AL356608.3	0.384231	0.0530958	3.41554	0.0023052	0.0333874	-0.800837	3.0478	0.018213
ATG2B	-0.159598	6.13668	-3.2878	0.00231241	0.0334649	-1.41021	-3.04687	0.0182553
NPIPA8	1.08657	-0.910329	3.48901	0.00231652	0.0334975	-0.594027	3.04633	0.0182731
FSTL4	-0.242121	5.8038	-3.28758	0.00231858	0.0335004	-1.37853	-3.04606	0.0182747
ZNF69	-0.226327	1.96615	-3.11596	0.00232489	0.0335438	-1.77934	-3.04525	0.0182984
CTBP2	-0.125094	7.26968	-3.32361	0.00232532	0.0335438	-1.31432	-3.04519	0.0182984
FAM184B	0.246095	4.66276	3.11523	0.0023302	0.0335766	-2.04108	3.04456	0.0183162
AC011466.3	0.313216	2.24692	3.19144	0.00233251	0.0335766	-1.35186	3.04426	0.0183162
TUBB4A	0.776772	0.324933	3.19213	0.0023335	0.0335766	-1.38984	3.04414	0.0183162
UCP3	-0.195717	0.95787	-3.11439	0.00233633	0.0335766	-1.67284	-3.04377	0.0183162
CXXC4	-0.222835	5.00246	-3.58637	0.0023374	0.0335766	-0.444857	-3.04363	0.0183162
PDXDC1	0.223974	7.09179	3.31863	0.00233965	0.0335766	-1.30019	3.04334	0.0183162
AC009974.2	0.459437	3.10787	3.24406	0.00234133	0.0335766	-1.25603	3.04313	0.0183162
AC017104.1	-0.341008	2.14011	-3.12854	0.00234251	0.0335766	-1.5128	-3.04298	0.0183162
RAPH1	0.250683	6.39271	3.40446	0.00234596	0.0335993	-1.04975	3.04253	0.0183286
NPR3	0.73343	-0.345962	3.31383	0.00235168	0.0336499	-1.12895	3.0418	0.0183563
PPP1R8	-0.184922	3.92565	-3.3065	0.0023562	0.0336499	-1.1568	-3.04122	0.0183563
TIMM29	-0.228843	3.44887	-3.14816	0.00235659	0.0336499	-1.50772	-3.04117	0.0183563
NEIL1	0.245145	2.01681	3.33901	0.00235697	0.0336499	-0.972463	3.04112	0.0183563
HSPB1	1.1395	1.11853	3.13552	0.00236022	0.0336696	-1.52195	3.04071	0.018367
TIGD1	-0.34887	2.89975	-3.27928	0.00236378	0.0336787	-1.1623	-3.04025	0.0183719
AC008937.2	0.357615	5.66652	3.22039	0.00236582	0.0336787	-1.48357	3.04	0.0183719
AC012020.1	-0.409748	3.7548	-3.12697	0.00236647	0.0336787	-1.57782	-3.03991	0.0183719
OSBPL7	-0.191903	2.76508	-3.92568	0.00237508	0.0337351	0.713127	-3.03882	0.0184027
G3BP1	-0.144854	5.89183	-3.21558	0.00237579	0.0337351	-1.51905	-3.03873	0.0184027
ZNF581	-0.386629	1.18553	-3.12384	0.00237606	0.0337351	-1.55735	-3.03869	0.0184027
AL451062.1	-0.225516	8.40082	-3.11376	0.00237995	0.0337637	-1.83685	-3.0382	0.0184183
S100B	0.904268	-0.311892	3.15301	0.00238458	0.0338028	-1.57016	3.03762	0.0184397
OXA1L	-0.212471	3.97207	-3.12726	0.00238677	0.0338072	-1.59731	-3.03734	0.0184421
DIS3	-0.134508	5.26338	-3.12646	0.00239971	0.0339564	-1.68173	-3.03571	0.0185234
TPM3	0.16046	6.20863	3.30265	0.00240107	0.0339564	-1.28874	3.03554	0.0185234
NFRKB	-0.151139	4.03194	-3.37593	0.00240467	0.0339806	-1.04309	-3.03509	0.0185367
PDE10A	-0.817656	-0.2111	-3.10408	0.00241255	0.0340652	-1.64509	-3.0341	0.0185828
BX088651.4	0.446877	-0.835026	3.10287	0.00242165	0.0341668	-1.57305	3.03296	0.0186382
LMOD1	-0.188022	7.59577	-3.15077	0.00242363	0.034168	-1.75076	-3.03272	0.0186389
GAPVD1	-0.135891	6.86534	-3.29823	0.00242611	0.0341719	-1.36982	-3.03241	0.018641
RALB	-0.177115	3.31866	-3.25507	0.00242856	0.0341719	-1.2606	-3.0321	0.018641
ZNF268	-0.149971	4.36412	-3.1343	0.0024296	0.0341719	-1.60971	-3.03197	0.018641
TMEM167A	-0.190819	4.80119	-3.10915	0.00243614	0.0342372	-1.69273	-3.03116	0.0186766
ARG2	0.161654	5.31948	3.58388	0.00243819	0.0342392	-0.656776	3.03091	0.0186777
SV2C	0.743439	0.845532	3.22631	0.00244524	0.0342911	-1.26868	3.03004	0.018706
IQCB1	-0.141589	5.80603	-3.58591	0.00244569	0.0342911	-0.598891	-3.02998	0.018706
PCBP2	-0.152517	7.69231	-3.10765	0.00245084	0.0343365	-1.83723	-3.02935	0.0187308
FUT4	-0.280308	1.68082	-3.27583	0.0024563	0.0343864	-1.12443	-3.02867	0.018758
ZNF484	-0.120673	4.01173	-3.78132	0.00246101	0.0344254	0.203308	-3.02809	0.0187793
ANXA2	1.09704	0.237183	3.26039	0.00248105	0.0346789	-1.18059	3.02564	0.0189176
HP1BP3	-0.0690846	6.95114	-3.09463	0.00248445	0.0346995	-2.31044	-3.02523	0.0189288
CPNE6	0.643848	0.721429	3.18931	0.0024908	0.0347488	-1.37416	3.02446	0.0189557
AC011933.4	0.279028	4.94177	3.20241	0.00249184	0.0347488	-1.49627	3.02433	0.0189557
ERLIN1	-0.124931	4.72798	-3.15434	0.00250134	0.034845	-1.59014	-3.02318	0.0190082
ORAI1	-0.29225	1.62186	-3.11365	0.00250261	0.034845	-1.56049	-3.02303	0.0190082
DCDC2B	0.376616	3.58592	3.50466	0.00250637	0.0348704	-0.570272	3.02257	0.019022
RBMXL1	-0.244018	2.95165	-3.10538	0.0025091	0.0348778	-1.59018	-3.02224	0.0190261
RAMAC	-0.40126	2.12622	-3.09529	0.00251078	0.0348778	-1.59783	-3.02204	0.0190261
SDR42E2	0.60895	0.0750204	3.1665	0.00251521	0.0349124	-1.5103	3.02151	0.0190449
PLEKHB1	-0.214189	8.05026	-3.09465	0.00251862	0.0349328	-1.87714	-3.02109	0.0190561
AC007314.1	0.478881	0.724613	3.11931	0.00252065	0.034934	-1.5903	3.02085	0.0190567
MAFB	0.880309	-1.36268	3.13427	0.00252566	0.0349571	-1.81565	3.02025	0.0190693
AC091045.1	0.338067	3.95902	3.35473	0.0025262	0.0349571	-1.09069	3.02019	0.0190693
CDYL	-0.115016	5.88066	-3.46227	0.00252943	0.034975	-0.964209	-3.0198	0.0190791
PYGB	0.369209	2.42659	3.1567	0.00253544	0.0349986	-1.44827	3.01908	0.019092
DDTL	-0.365867	0.115781	-3.52401	0.00253649	0.0349986	-0.50395	-3.01895	0.019092
RTCA-AS1	-0.202593	4.52652	-3.12186	0.00253786	0.0349986	-1.65882	-3.01879	0.019092
RAB3IL1	0.700652	3.89566	3.26219	0.00253892	0.0349986	-1.25556	3.01866	0.019092
ERO1B	-0.129304	6.54108	-3.08592	0.00255247	0.0351526	-2.31321	-3.01705	0.019176
STC1	0.41665	0.223481	3.21377	0.00255502	0.0351526	-1.31692	3.01675	0.019176
DNAAF2	-0.173791	4.40823	-3.12356	0.00255715	0.0351526	-1.64796	-3.0165	0.019176
KBTBD3	-0.197262	5.06188	-3.1349	0.0025579	0.0351526	-1.66748	-3.01641	0.019176
AP001266.2	0.253366	5.13655	3.65735	0.00256053	0.0351619	-0.274787	3.01609	0.0191811
NDST3	-0.500249	1.64078	-3.08374	0.00256979	0.0352621	-1.86481	-3.015	0.0192357
AL662844.4	0.300987	1.62181	3.08311	0.00257479	0.0353038	-1.75117	3.01441	0.0192585
VMP1	0.138825	6.65969	3.10011	0.00259373	0.0355365	-1.8279	3.01219	0.0193854
AC007953.2	0.443844	-0.377102	3.08043	0.00259623	0.0355399	-1.62731	3.01189	0.0193873
F3	0.517771	2.80834	3.11688	0.00259831	0.0355399	-1.56565	3.01165	0.0193873
AC023389.1	0.294759	4.86981	3.3148	0.0026018	0.0355399	-1.20276	3.01124	0.0193873
UQCRHL	-0.332221	1.72498	-3.11234	0.00260362	0.0355399	-1.55553	-3.01103	0.0193873
AC091132.2	0.29198	1.51787	3.22743	0.00260385	0.0355399	-1.25183	3.011	0.0193873
SUN2	0.18598	3.7827	3.33772	0.00260658	0.0355502	-1.059	3.01069	0.0193929
AD001527.1	0.258449	0.925587	3.38641	0.00261388	0.0356112	-0.822109	3.00984	0.0194262
PTAR1	-0.128535	6.27415	-3.47191	0.00261501	0.0356112	-1.00555	-3.00971	0.0194262
ZKSCAN2	-0.187874	2.86443	-3.1143	0.00262119	0.035631	-1.57036	-3.00899	0.0194369
TTC9B	0.823611	1.10612	3.15251	0.00262363	0.035631	-1.45689	3.00871	0.0194369
ETV5	0.860046	3.21963	3.18248	0.00262421	0.035631	-1.49765	3.00864	0.0194369
RPP14	-0.164851	3.44877	-3.30894	0.00262438	0.035631	-1.11429	-3.00862	0.0194369
DAP3	-0.130854	7.01071	-3.13669	0.00263028	0.0356842	-1.77545	-3.00794	0.019466
LRRC75B	0.558127	-0.751554	3.16082	0.00263501	0.0357215	-1.58183	3.00739	0.0194863
AC078785.1	0.241409	4.27552	3.20512	0.00265335	0.035936	-1.43666	3.00528	0.0196033
RPS6KA6	-0.152098	5.96708	-3.22773	0.00265602	0.035936	-1.54522	-3.00498	0.0196033
PEX11G	0.236796	2.48244	3.33576	0.00265682	0.035936	-0.975993	3.00488	0.0196033
LARP4	-0.138626	5.82747	-3.77941	0.0026642	0.0359585	-0.103285	-3.00404	0.0196156
AL353768.2	0.277085	1.26756	3.37781	0.00266436	0.0359585	-0.847349	3.00402	0.0196156
LATS2	-0.433119	1.7327	-3.76403	0.00266448	0.0359585	0.268811	-3.00401	0.0196156
EIF5A2	0.488602	0.787929	3.10556	0.00267057	0.0359879	-1.61389	3.00331	0.0196317
STPG2	-0.265408	7.06896	-3.25104	0.00267268	0.0359879	-1.56677	-3.00307	0.0196317
MED4	-0.122539	5.83769	-3.11629	0.00267493	0.0359879	-1.77042	-3.00282	0.0196317
PIK3IP1-AS1	0.187834	4.09826	3.07071	0.00267549	0.0359879	-2.11662	3.00275	0.0196317
AC111152.2	1.557	-2.06978	3.21036	0.00267666	0.0359879	-1.53289	3.00262	0.0196317
SH3BP5-AS1	-0.236036	4.23454	-3.13927	0.00268636	0.0360733	-1.62018	-3.00152	0.0196782
FBXL4	-0.150961	5.90656	-3.27357	0.00268701	0.0360733	-1.40877	-3.00145	0.0196782
ZBTB34	-0.189021	4.29934	-3.52532	0.00269504	0.0361361	-0.651067	-3.00054	0.0197125
TYRO3	0.491136	0.868746	3.06827	0.00269571	0.0361361	-1.71211	3.00046	0.0197125
MICU3	-0.146748	7.04095	-3.08471	0.00270007	0.0361676	-1.87447	-2.99997	0.0197297
ZNF8	-0.1291	3.55191	-3.78183	0.00270209	0.0361678	0.180248	-2.99974	0.0197298
AC083799.1	-0.289764	-0.0297159	-3.23226	0.00271529	0.0363176	-1.31779	-2.99826	0.0198115
AC005863.1	-0.226356	5.60061	-3.06738	0.002718	0.0363267	-1.8398	-2.99795	0.0198165
SLC16A7	0.710403	1.60532	3.1786	0.00272175	0.0363499	-1.38222	2.99753	0.0198291
SRSF11	-0.106552	7.59258	-3.1699	0.00272443	0.0363588	-1.75571	-2.99723	0.019834
ZWILCH	0.176101	2.37865	3.06452	0.00272701	0.0363661	-1.90168	2.99694	0.019838
CCDC91	-0.151998	8.63655	-3.09775	0.00273555	0.0364054	-1.92018	-2.99599	0.0198594
RBM26-AS1	0.219028	3.00928	3.06346	0.00273595	0.0364054	-2.00674	2.99595	0.0198594
EMC1-AS1	0.243699	5.94284	3.15544	0.00273602	0.0364054	-1.67769	2.99594	0.0198594
ZNF816	-0.160829	1.01686	-3.06229	0.00274583	0.0364933	-1.79939	-2.99485	0.0199073
UBR3	-0.116315	8.3675	-3.27105	0.00274786	0.0364933	-1.60334	-2.99462	0.0199073
KLHDC8B	0.305549	0.254201	3.35071	0.0027487	0.0364933	-0.914003	2.99453	0.0199073
CXCL17	0.284096	3.43606	3.24452	0.00275138	0.0365019	-1.32353	2.99423	0.019912
ZBTB39	-0.263372	1.66159	-3.14679	0.00275967	0.0365849	-1.46646	-2.99331	0.0199573
AC107021.1	0.837744	6.23161	3.10957	0.00276243	0.0365946	-1.79024	2.99301	0.0199626
SLTM	-0.109341	7.51549	-3.25506	0.00276845	0.036629	-1.56586	-2.99234	0.0199814
RTL8B	-0.396191	2.65536	-3.06679	0.0027691	0.036629	-1.67773	-2.99227	0.0199814
ATP1B1	0.631847	4.76573	3.24319	0.00277172	0.0366368	-1.42749	2.99198	0.0199856
AL160408.1	-0.27005	6.19802	-3.0827	0.00277554	0.0366449	-1.85321	-2.99156	0.0199901
ARMCX5-GPRASP2.1	-0.283168	-0.323924	-3.35869	0.00277641	0.0366449	-0.936497	-2.99147	0.0199901
MRPL13	-0.181167	4.49949	-3.15632	0.00277942	0.0366579	-1.60941	-2.99114	0.0199971
SLC16A2	0.488467	2.61123	3.11446	0.00279129	0.0367874	-1.5639	2.98983	0.0200678
PC	0.227726	3.56825	3.06902	0.00279369	0.0367921	-1.71751	2.98957	0.0200704
AC112493.1	0.567258	2.00893	3.19443	0.00280171	0.0368707	-1.36332	2.9887	0.0201132
NIPBL	-0.137198	8.4092	-3.30988	0.00281229	0.036983	-1.50916	-2.98754	0.0201745
RPL29	-0.446061	6.21628	-3.05388	0.00281791	0.0370103	-1.89072	-2.98693	0.0201893
FAM120AOS	-0.193997	5.52362	-3.06703	0.00281848	0.0370103	-1.85509	-2.98687	0.0201893
CEP41	0.154053	4.63675	3.05255	0.00282944	0.0371272	-2.24341	2.98568	0.0202531
EIF3E	-0.204409	6.01386	-3.05873	0.00283194	0.0371328	-1.9053	-2.98542	0.0202562
SLC4A3	0.577895	0.836361	3.20359	0.0028356	0.0371538	-1.31819	2.98502	0.0202676
SCUBE3	0.310191	3.53914	3.09571	0.00284264	0.0371816	-1.66273	2.98426	0.0202828
LINC02803	-0.29602	1.71831	-3.32197	0.00284327	0.0371816	-1.01009	-2.98419	0.0202828
ANGPTL5	0.518231	-0.420521	3.07179	0.00284392	0.0371816	-1.84093	2.98412	0.0202828
ZFP91	-0.134395	5.39011	-3.28722	0.00285215	0.0372621	-1.41812	-2.98324	0.0203267
VSTM2L	0.641821	0.433243	3.21451	0.00285502	0.0372726	-1.30847	2.98293	0.0203325
PINX1	-0.161559	6.4446	-3.5382	0.00286238	0.0373416	-0.761022	-2.98214	0.0203701
AL035071.1	-0.316494	2.36413	-3.05588	0.00287074	0.0374063	-1.70065	-2.98125	0.0204054
PRRC1	-0.145798	4.1459	-3.48396	0.00287183	0.0374063	-0.709864	-2.98113	0.0204054
TRBV26OR9-2	-0.345762	-0.00782494	-4.05526	0.00287357	0.0374063	1.22751	-2.98095	0.0204054
ELK4	-0.18164	4.52165	-3.1348	0.00287695	0.0374232	-1.6385	-2.98059	0.0204146
HSD17B4	-0.115607	5.50452	-3.51408	0.0028808	0.0374463	-0.790865	-2.98018	0.0204272
KATNAL1	-0.109227	6.06699	-3.45309	0.00288608	0.0374799	-1.02194	-2.97962	0.0204455
ITGB5-AS1	0.322558	3.30064	3.13387	0.00288755	0.0374799	-1.54826	2.97946	0.0204455
EPS8	-0.144571	9.32722	-3.25495	0.00289552	0.0375563	-1.68433	-2.97862	0.0204872
AC118555.1	0.435425	2.4334	3.07126	0.00289776	0.0375583	-1.67039	2.97838	0.0204883
RNF213	0.17545	7.74081	3.11364	0.00290984	0.0376877	-1.872	2.97711	0.0205589
NINL	0.34367	2.87393	3.09142	0.00291982	0.0377898	-1.62948	2.97606	0.0206146
AP003392.1	0.302742	2.83184	3.21963	0.00292217	0.037793	-1.3633	2.97581	0.0206164
PTENP1-AS	-0.187112	5.05492	-3.48115	0.00292526	0.0378058	-0.918463	-2.97548	0.0206233
KLRK1	0.467627	1.21549	3.55429	0.00293117	0.0378454	-0.355574	2.97487	0.0206449
PACRG	-0.179868	7.24863	-3.16311	0.00293362	0.0378454	-1.74295	-2.97461	0.0206449
ZNF385D-AS2	-1.07292	-0.337985	-4.53334	0.00293463	0.0378454	2.80257	-2.9745	0.0206449
LINC01285	0.224184	2.16837	3.43732	0.00294382	0.0378766	-0.793741	2.97354	0.0206619
AMDHD2	0.167247	2.68911	3.03933	0.00294666	0.0378766	-2.02177	2.97325	0.0206619
SLC16A3	0.26814	4.43265	3.13464	0.00294674	0.0378766	-1.65986	2.97324	0.0206619
ASB7	-0.145606	4.14905	-3.06881	0.00294733	0.0378766	-1.77405	-2.97318	0.0206619
AATK	0.215957	3.60898	3.26799	0.00294757	0.0378766	-1.29046	2.97315	0.0206619
TSNAXIP1	0.194762	3.51155	3.10002	0.0029548	0.0379425	-1.66113	2.9724	0.0206979
AL353689.3	0.2976	2.21293	3.2153	0.00297547	0.0381806	-1.31274	2.97026	0.0208278
ZNF837	0.269409	1.95948	4.48454	0.00298226	0.0382373	2.72504	2.96956	0.0208587
BMX	0.469208	-0.10949	3.08088	0.00298631	0.0382373	-1.76382	2.96914	0.0208587
LINC01322	0.309283	3.02742	3.28515	0.00298761	0.0382373	-1.18535	2.96901	0.0208587
AC022762.2	-0.301894	0.909325	-3.12343	0.00298839	0.0382373	-1.5344	-2.96893	0.0208587
ZNF503-AS1	0.500602	0.59308	3.15119	0.0029978	0.0383305	-1.45803	2.96796	0.0209095
AL354702.2	0.60189	1.53905	3.03321	0.00300235	0.0383432	-1.84564	2.9675	0.0209165
TGDS	-0.123764	3.88758	-3.7287	0.00300442	0.0383432	0.0399406	-2.96729	0.0209165
TBC1D10A	0.173665	5.89235	3.2925	0.00300692	0.0383432	-1.38989	2.96703	0.0209165
ZNF22	-0.304857	4.43905	-3.10204	0.00300731	0.0383432	-1.73094	-2.96699	0.0209165
AC044849.1	0.360364	0.0604738	3.28214	0.00301213	0.0383725	-1.09885	2.9665	0.0209324
AC068587.4	0.242715	5.05454	3.03196	0.00301387	0.0383725	-2.3224	2.96632	0.0209324
FBXL19-AS1	-0.23615	0.825863	-3.03172	0.0030161	0.0383738	-1.86717	-2.96609	0.0209332
SWAP70	0.383991	1.79291	3.52841	0.00301845	0.0383765	-0.468596	2.96585	0.0209347
CEMIP2	0.206347	5.71483	3.28343	0.00302773	0.0384673	-1.49914	2.96491	0.0209842
CEP120	-0.141627	5.86039	-3.13175	0.00303473	0.0385291	-1.78724	-2.9642	0.0210179
SPART	-0.0879533	6.4791	-3.02935	0.00303804	0.038544	-2.47327	-2.96386	0.021026
TYW5	-0.0893997	4.72557	-3.02859	0.00304511	0.0385872	-2.34035	-2.96315	0.0210496
SLC25A21-AS1	-0.277751	3.75413	-3.08	0.00304573	0.0385872	-1.7252	-2.96308	0.0210496
BAALC-AS1	-0.183884	2.59559	-3.02772	0.00305327	0.0386554	-2.10374	-2.96232	0.0210868
TUG1	-0.210261	5.72395	-3.09945	0.00305662	0.0386594	-1.81395	-2.96199	0.021089
METTL9	-0.146157	5.00283	-3.07113	0.00305788	0.0386594	-1.84771	-2.96186	0.021089
SAT1	0.281598	5.11067	3.229	0.00306047	0.0386651	-1.48083	2.9616	0.021092
SLC25A53	-0.136168	5.83634	-3.09398	0.00308382	0.0389144	-1.84687	-2.95926	0.0212281
ZBTB26	-0.125123	3.50342	-3.86664	0.00308454	0.0389144	0.378034	-2.95919	0.0212281
MRPL14	-0.225833	4.86691	-3.06271	0.00308956	0.0389505	-1.85811	-2.95868	0.0212477
SLC35G2	0.194379	3.56035	3.31667	0.00312735	0.0393994	-1.17249	2.95493	0.0214926
SSTR2	0.503437	0.460779	3.2236	0.00313858	0.0395132	-1.25976	2.95383	0.0215547
AC011625.1	0.403057	3.64295	3.41579	0.00314717	0.039569	-0.925581	2.95298	0.0215852
TESC-AS1	0.375285	0.827004	3.55656	0.00314765	0.039569	-0.329106	2.95294	0.0215852
RPAP1	0.161074	3.50008	3.07719	0.00314961	0.039569	-1.71576	2.95275	0.0215852
SATB1	-0.169629	5.0036	-3.09269	0.0031532	0.039577	-1.79883	-2.95239	0.0215895
AC096675.1	0.441593	0.977243	3.03873	0.00315464	0.039577	-1.76278	2.95225	0.0215895
DANT2	0.414802	6.79896	3.18286	0.00316746	0.0397101	-1.71847	2.951	0.0216621
CRYM	0.708615	1.68839	3.12971	0.00317607	0.0397904	-1.50803	2.95016	0.0217059
LINC-PINT	0.191202	5.60986	3.14889	0.00318007	0.0398059	-1.74288	2.94977	0.0217144
AL442071.1	0.224452	3.81827	3.35407	0.00318173	0.0398059	-1.18507	2.94961	0.0217144
AC074117.1	-0.17699	4.0479	-3.22814	0.00319434	0.0399111	-1.41983	-2.94839	0.0217718
NFYA	-0.166951	3.80752	-3.36371	0.00319457	0.0399111	-1.11304	-2.94837	0.0217718
AC020661.2	0.327433	2.54167	3.09843	0.00320216	0.039967	-1.61019	2.94763	0.0218023
TMED3	-0.294887	2.9769	-3.13973	0.00320349	0.039967	-1.5269	-2.94751	0.0218023
HMX1	0.71333	0.910714	3.04032	0.00320709	0.03997	-1.74701	2.94716	0.0218039
WDR82	-0.106352	4.88354	-3.17431	0.00321032	0.03997	-1.61083	-2.94685	0.0218039
PCSK7	0.179233	5.84232	3.02825	0.00321039	0.03997	-1.98263	2.94684	0.0218039
BSDC1	-0.128873	5.47135	-3.01926	0.00321529	0.0399906	-1.97108	-2.94637	0.0218152
AC003681.1	0.312192	4.18376	3.01713	0.00321649	0.0399906	-1.89046	2.94625	0.0218152
BMI1	-0.24939	4.37963	-3.04666	0.0032252	0.0400712	-1.85588	-2.94542	0.0218591
SRFBP1	-0.121598	5.36741	-3.5091	0.00323341	0.0401455	-0.774034	-2.94463	0.0218997
FOXP1-IT1	-0.232648	0.928831	-3.29664	0.00323589	0.0401487	-1.06531	-2.94439	0.0219014
NSMAF	0.22227	3.89385	3.01226	0.00323983	0.0401698	-1.88416	2.94402	0.0219129
MTPAP	-0.14956	4.00931	-3.16071	0.00324651	0.0402148	-1.57109	-2.94338	0.0219375
AC007376.2	-0.218482	7.08635	-3.19742	0.00324792	0.0402148	-1.76257	-2.94324	0.0219375
AC073389.2	0.274709	1.25225	3.0881	0.00325273	0.0402279	-1.61508	2.94279	0.0219446
LINC01237	-0.300389	2.49849	-3.59329	0.00325345	0.0402279	-0.376163	-2.94272	0.0219446
DNAJC13	-0.157362	5.86476	-3.16228	0.00326992	0.0403948	-1.7231	-2.94115	0.0220356
YTHDF2	-0.121251	5.10381	-3.17204	0.00327143	0.0403948	-1.61054	-2.94101	0.0220356
BEND6	0.588515	1.54015	3.24608	0.00327616	0.0404254	-1.20526	2.94056	0.0220523
MKRN3	-0.155666	5.73878	-3.03543	0.0032822	0.0404722	-1.97175	-2.93999	0.0220779
ANKRD33	0.238697	6.94768	3.64581	0.00328697	0.0405033	-0.477945	2.93954	0.0220948
ZNF549	-0.133825	4.78243	-3.12459	0.00329117	0.0405141	-1.73945	-2.93915	0.0221007
AC010319.5	-0.373183	3.27858	-3.08646	0.00329235	0.0405141	-1.68915	-2.93904	0.0221007
RNF6	-0.251378	4.60782	-3.00883	0.0033059	0.0406395	-1.94701	-2.93776	0.0221691
AL139815.1	0.294688	3.64216	3.01057	0.00330965	0.0406395	-1.87302	2.93741	0.0221691
CNTNAP1	0.312625	2.88973	3.10114	0.00331037	0.0406395	-1.63623	2.93734	0.0221691
AC084361.1	0.403213	6.21823	3.0048	0.00331296	0.0406395	-2.03685	2.9371	0.0221691
AC016727.1	0.200408	3.13842	3.10028	0.00331382	0.0406395	-1.63964	2.93702	0.0221691
AC090001.1	-0.314405	2.71783	-3.00562	0.00332013	0.0406764	-1.83398	-2.93643	0.0221892
AC007193.1	0.455825	0.748843	3.00376	0.00332361	0.0406764	-1.87009	2.93611	0.0221892
LNPEP	-0.13299	6.0994	-3.40633	0.00332361	0.0406764	-1.17288	-2.93611	0.0221892
BAMBI	0.703758	0.300567	3.00526	0.00332976	0.040724	-1.90324	2.93553	0.0222152
AL078459.1	0.286713	3.72264	3.03939	0.00333218	0.0407259	-1.82406	2.93531	0.0222163
AC073167.1	0.339964	5.19924	3.03258	0.00334257	0.0408199	-1.9336	2.93434	0.0222675
LINC01952	0.307363	1.50465	3.32046	0.0033444	0.0408199	-1.01028	2.93417	0.0222675
DPH3	-0.228143	3.41666	-3.02426	0.00334677	0.0408211	-1.83594	-2.93395	0.0222682
MEF2A	-0.119362	7.33599	-3.29971	0.00334965	0.0408285	-1.43564	-2.93368	0.0222722
TP53RK	-0.303508	2.12636	-3.02353	0.00335314	0.04084	-1.77943	-2.93336	0.0222785
TYRP1	0.796011	-1.57792	3.09314	0.00335513	0.04084	-1.78814	2.93318	0.0222785
SPANXA2-OT1	0.350212	1.78726	3.04434	0.00337149	0.0410114	-1.72559	2.93167	0.022372
TTC34	0.352834	2.87026	2.99735	0.00338059	0.0410544	-1.86376	2.93083	0.0223955
MFSD4A	0.157643	3.22339	2.9942	0.00338136	0.0410544	-2.21329	2.93076	0.0223955
ELOVL5	0.290677	4.41769	3.0447	0.00338186	0.0410544	-1.8622	2.93071	0.0223955
UBAC2-AS1	0.231604	0.333384	2.99327	0.0033909	0.0411126	-1.87809	2.92988	0.0224272
AC093110.1	0.613441	2.15618	2.99575	0.00339123	0.0411126	-1.84879	2.92985	0.0224272
FGFRL1	0.48036	0.256949	3.06518	0.00339552	0.041137	-1.7295	2.92946	0.0224405
RCC2	-0.16334	3.21668	-2.99244	0.00339941	0.0411486	-2.28201	-2.9291	0.0224468
EVI2B	0.37594	3.09192	3.00211	0.00340105	0.0411486	-1.86942	2.92895	0.0224468
SMARCA5	-0.112969	6.82611	-3.23671	0.00340549	0.0411618	-1.66173	-2.92855	0.0224541
ZDHHC24	0.208657	3.64666	3.14852	0.00340675	0.0411618	-1.56988	2.92843	0.0224541
TRAPPC6B	-0.0688357	5.57208	-2.99152	0.003409	0.0411618	-2.51957	-2.92823	0.0224541
TULP4	-0.124857	7.40247	-3.14135	0.00341245	0.0411759	-1.86363	-2.92791	0.0224617
ARL5B	-0.159216	3.31783	-3.37327	0.00341649	0.0411847	-1.05702	-2.92755	0.0224665
RB1CC1	-0.135562	7.09891	-3.16149	0.00342011	0.0411847	-1.85031	-2.92722	0.0224665
PHF24	0.691755	-0.119365	3.0795	0.00342101	0.0411847	-1.69646	2.92713	0.0224665
STAMBPL1	0.7454	-0.633574	3.03174	0.00342268	0.0411847	-1.93576	2.92698	0.0224665
ITGAL	0.288553	4.23035	3.25287	0.00342462	0.0411847	-1.43218	2.92681	0.0224665
CWC15	-0.192538	4.74599	-2.99479	0.00343247	0.0412469	-1.99731	-2.92609	0.0225005
C1GALT1	-0.116102	6.52866	-3.36011	0.00343565	0.0412469	-1.36014	-2.92581	0.0225005
GCSAML	-0.40234	1.24911	-3.09588	0.00343667	0.0412469	-1.59746	-2.92571	0.0225005
CHUK	-0.126976	4.59095	-3.60623	0.00344034	0.0412594	-0.517107	-2.92538	0.0225073
SYT4	0.596788	2.1227	3.04606	0.00344229	0.0412594	-1.72901	2.9252	0.0225073
ST6GALNAC5	-0.699535	-0.744455	-2.98782	0.00344735	0.0412715	-1.90511	-2.92475	0.0225139
DNAJC3	-0.138342	5.51558	-4.134	0.00344789	0.0412715	1.31445	-2.9247	0.0225139
AC073050.1	0.380895	5.07288	3.35828	0.00345883	0.0413749	-1.34161	2.92371	0.0225703
APOA1-AS	0.322688	3.69769	3.59874	0.00346143	0.0413786	-0.337714	2.92348	0.0225723
MAST2	0.139846	6.53704	3.00773	0.00348223	0.041565	-2.07778	2.92161	0.022674
LINC02301	-0.284356	1.70355	-2.98441	0.00348313	0.041565	-2.11546	-2.92153	0.022674
C2CD5	-0.150856	7.56989	-3.06134	0.00348698	0.041565	-2.01415	-2.92119	0.022674
TOMM40	0.161122	4.73722	3.33943	0.00348737	0.041565	-1.25348	2.92115	0.022674
YAE1	-0.194769	4.47584	-3.04389	0.00348857	0.041565	-1.8796	-2.92105	0.022674
WFDC3	0.390954	6.31172	3.17029	0.00350334	0.0417133	-1.74042	2.91973	0.0227549
SPHK2	0.149875	4.998	3.19878	0.00350981	0.0417517	-1.55629	2.91916	0.0227759
ZNF577	-0.119006	4.38746	-3.20384	0.00351189	0.0417517	-1.58858	-2.91897	0.0227759
BCAN	0.683766	-0.535465	3.27361	0.00351502	0.0417517	-1.18805	2.91869	0.0227759
TANGO2	0.211612	3.23632	3.15036	0.00351584	0.0417517	-1.52394	2.91862	0.0227759
LRRK1	0.371245	0.407127	3.05145	0.0035241	0.041797	-1.7676	2.91789	0.0228006
GFPT2	0.494861	-0.897773	3.19879	0.0035243	0.041797	-1.46606	2.91787	0.0228006
CAP2	0.489355	1.6676	3.11722	0.00353095	0.0418484	-1.54237	2.91728	0.0228286
MSH5	0.190734	5.93155	3.05452	0.00354113	0.0419415	-1.94265	2.91638	0.0228794
NPC1	0.173228	6.28186	3.16882	0.0035595	0.0421179	-1.7713	2.91477	0.0229756
SLC28A2	0.431136	1.87444	3.21638	0.00356071	0.0421179	-1.30143	2.91466	0.0229756
ANTXR2	0.671132	5.26712	3.34009	0.0035704	0.0422024	-1.23356	2.91382	0.0230217
PLA2G4E-AS1	0.290028	-0.447122	2.97578	0.00357528	0.0422024	-1.89413	2.91339	0.0230217
CPTP	-0.374066	1.10558	-2.9788	0.00357692	0.0422024	-1.91281	-2.91325	0.0230217
NLRC3	0.287719	3.66254	3.18576	0.00357723	0.0422024	-1.47301	2.91322	0.0230217
FAM24B	-0.129843	2.7656	-3.82877	0.00358538	0.0422709	0.330294	-2.91251	0.0230591
RAB3B	0.48293	0.494825	3.08612	0.00359347	0.0423198	-1.6361	2.91181	0.0230857
LARGE-AS1	0.348335	4.52669	3.0253	0.00359423	0.0423198	-1.92327	2.91174	0.0230857
SMIM30	-0.33699	3.42219	-2.97656	0.00360078	0.0423692	-1.95513	-2.91117	0.0231127
NUAK1	0.720042	0.0858929	3.10751	0.00360894	0.0424375	-1.62	2.91046	0.0231499
AC018695.2	0.264212	4.79962	3.17535	0.00361679	0.0425021	-1.66009	2.90978	0.0231852
AC036214.2	-0.314521	0.890298	-2.98953	0.0036339	0.0426753	-1.8794	-2.90831	0.0232796
AC005759.1	0.341551	0.361591	3.78829	0.00364219	0.0427176	0.370468	2.9076	0.0233027
SMIM4	0.157284	4.99028	3.055	0.00364225	0.0427176	-1.90839	2.90759	0.0233027
FAM234A	0.175108	4.73651	3.04403	0.00364658	0.0427405	-1.90771	2.90722	0.0233152
ANKRD9	0.380754	1.29626	3.15245	0.00365231	0.0427643	-1.44931	2.90673	0.0233282
DCUN1D1	-0.121478	5.58774	-3.37097	0.00365337	0.0427643	-1.14029	-2.90664	0.0233282
NCR3LG1	0.415441	-0.204205	3.11497	0.003664	0.0428609	-1.62758	2.90573	0.0233809
AC097382.3	-0.318584	3.36292	-3.00821	0.00367896	0.0429707	-1.88406	-2.90445	0.0234408
ACSL6	-0.126528	6.79807	-3.00673	0.00367916	0.0429707	-2.11668	-2.90444	0.0234408
VIPAS39	0.112885	4.74207	3.14456	0.00368139	0.0429707	-1.69387	2.90425	0.0234408
AC012063.1	-0.23647	3.61423	-3.01096	0.00368293	0.0429707	-1.89732	-2.90411	0.0234408
TRIOBP	0.200346	3.16636	3.10318	0.00369826	0.0431215	-1.65571	2.90281	0.0235231
RTL9	0.813029	1.33874	3.04229	0.00370335	0.0431215	-1.75083	2.90238	0.0235231
AC105389.2	0.470806	-0.398503	2.97815	0.00370398	0.0431215	-2.03806	2.90233	0.0235231
CBR3-AS1	0.245486	0.901573	2.96384	0.00370631	0.0431215	-1.98125	2.90213	0.0235231
CRBN	-0.102134	5.85314	-3.02745	0.00370783	0.0431215	-2.02975	-2.902	0.0235231
TCEA3	0.589701	-0.528436	3.17393	0.00371504	0.0431736	-1.45243	2.9014	0.0235515
DEPDC5	0.178729	5.15559	2.9819	0.00371711	0.0431736	-2.06218	2.90122	0.0235515
AC022154.1	0.219904	2.49905	3.19145	0.0037233	0.0432177	-1.40704	2.9007	0.0235756
PHKA1	-0.30527	3.65068	-3.39855	0.00373662	0.0433443	-0.986565	-2.89958	0.0236446
PLD6	-0.37354	0.668184	-2.98875	0.00375812	0.0435656	-1.89711	-2.89778	0.0237653
AP000462.2	0.502051	2.68812	2.95806	0.00377147	0.0436923	-1.95865	2.89667	0.0238345
AC009686.1	0.498693	1.16843	2.95835	0.00378971	0.0438713	-1.95343	2.89516	0.0239321
SCARB1	-0.297382	4.69445	-3.04579	0.0037918	0.0438713	-1.90412	-2.89498	0.0239321
PABPC5	0.35101	0.256885	3.39818	0.00379435	0.0438727	-0.776155	2.89477	0.0239328
ADIPOR1	-0.189585	5.21677	-2.95793	0.00380593	0.0439381	-2.1208	-2.89381	0.0239685
USP24	-0.145755	6.21931	-3.22562	0.00380674	0.0439381	-1.66301	-2.89375	0.0239685
BAD	-0.278413	4.18813	-2.95831	0.00380733	0.0439381	-2.04544	-2.8937	0.0239685
LYRM7	-0.133019	4.51757	-2.97374	0.00381149	0.0439555	-2.05035	-2.89336	0.023978
MAFG	0.228526	3.4286	2.95435	0.00381372	0.0439555	-2.33298	2.89317	0.023978
ANP32A	-0.154357	6.64581	-2.99552	0.00381878	0.0439755	-2.14188	-2.89276	0.0239889
RAB14	-0.198563	5.66575	-3.06952	0.00382034	0.0439755	-1.92415	-2.89263	0.0239889
BHLHE22	0.64391	0.726414	3.05156	0.00382466	0.0439971	-1.70881	2.89227	0.0240007
PLA2G4C-AS1	-0.270578	7.13776	-3.00294	0.00383391	0.0440753	-2.14073	-2.89151	0.0240434
AL450384.2	0.264996	7.46562	2.98455	0.00384241	0.0441448	-2.18069	2.89082	0.0240813
DENND1B	-0.129543	6.47881	-3.20051	0.00385627	0.0442657	-1.75644	-2.88969	0.0241473
OMG	0.351168	4.78849	3.20896	0.00385842	0.0442657	-1.50959	2.88951	0.0241473
N4BP2L2-IT2	-0.267126	2.57194	-3.03443	0.00386031	0.0442657	-1.79718	-2.88936	0.0241473
PPP1R14C	0.789707	-0.916712	3.08986	0.00386639	0.0442887	-1.70408	2.88886	0.0241598
DNAJC9-AS1	0.234328	1.65166	3.24479	0.00386724	0.0442887	-1.24576	2.88879	0.0241598
C4orf46	-0.228363	4.22226	-2.96696	0.0038788	0.0443912	-2.04155	-2.88785	0.0242157
UBL3	-0.128811	7.11272	-3.04345	0.00388112	0.0443912	-2.10301	-2.88767	0.0242157
RBX1	-0.168066	6.54976	-2.95329	0.00388658	0.0444252	-2.20661	-2.88722	0.0242343
ACP5	-0.333584	3.20075	-2.94865	0.00388903	0.0444252	-1.99496	-2.88703	0.0242343
IMPDH1	-0.148542	6.60609	-3.00196	0.00389634	0.0444594	-2.13073	-2.88643	0.0242529
PPP2R2C	0.343982	3.07775	3.17911	0.00389696	0.0444594	-1.45628	2.88638	0.0242529
AC003965.1	0.259118	0.0873368	2.94639	0.00390585	0.0445327	-1.99317	2.88567	0.0242929
ANGPTL4	0.829504	0.700533	3.19574	0.00391628	0.0445537	-1.3372	2.88483	0.0243043
AC120349.1	0.381055	-0.136767	3.08845	0.00391674	0.0445537	-1.64522	2.88479	0.0243043
TBC1D5	-0.142441	8.78474	-3.04117	0.00391716	0.0445537	-2.13845	-2.88476	0.0243043
CENPM	0.317113	-0.55428	3.24369	0.00391969	0.0445537	-1.21957	2.88455	0.0243043
AC005746.2	0.349278	3.17687	2.99125	0.00392007	0.0445537	-1.907	2.88452	0.0243043
SLC16A4	0.266893	4.63795	3.04333	0.0039328	0.0446701	-1.92327	2.8835	0.0243679
PLD3	0.17839	5.76177	3.08935	0.00394227	0.0447495	-1.85813	2.88274	0.0244112
KCNA2	0.701958	0.227301	3.06513	0.00394911	0.0447726	-1.70245	2.8822	0.0244238
SHLD3	-0.344449	0.576566	-3.07015	0.00394928	0.0447726	-1.676	-2.88218	0.0244238
AC007405.1	0.392802	1.52095	3.15851	0.00395212	0.0447766	-1.43566	2.88196	0.0244259
NFXL1	-0.125801	5.07319	-3.18397	0.00396454	0.0448867	-1.71767	-2.88097	0.024486
MTMR2	-0.114266	5.43395	-3.17011	0.00396682	0.0448867	-1.74273	-2.88079	0.024486
LINC01578	-0.132663	6.51037	-2.95952	0.00398098	0.0449569	-2.19738	-2.87967	0.0245243
SNAP25-AS1	0.372718	8.69588	2.96333	0.00398142	0.0449569	-2.28743	2.87963	0.0245243
IL12RB2	0.26141	1.2788	2.93995	0.00398204	0.0449569	-2.09082	2.87958	0.0245243
RNF19A	-0.106353	6.69209	-3.33132	0.00398302	0.0449569	-1.48113	-2.8795	0.0245243
OGN	0.484207	2.71274	2.97741	0.00399015	0.0450092	-1.91869	2.87894	0.0245528
ISOC1	-0.330177	2.21264	-2.96139	0.00400759	0.0451523	-1.93719	-2.87756	0.0246309
PIWIL4	-0.194222	4.64227	-3.13776	0.00400894	0.0451523	-1.78338	-2.87746	0.0246309
LLPH-DT	-0.341872	1.1278	-3.01573	0.00401036	0.0451523	-1.79611	-2.87735	0.0246309
CPQ	-0.156099	6.76839	-3.14167	0.00402031	0.0451578	-1.87927	-2.87656	0.0246339
AC092747.4	-0.223775	2.0972	-3.17523	0.00402111	0.0451578	-1.44248	-2.8765	0.0246339
PLAGL2	-0.17437	4.19992	-3.02498	0.00402325	0.0451578	-1.91796	-2.87633	0.0246339
MACROD2	-0.168369	8.86575	-3.26637	0.00402492	0.0451578	-1.82477	-2.8762	0.0246339
CCK	0.741441	0.587705	3.20777	0.00402529	0.0451578	-1.29887	2.87617	0.0246339
PPIG	-0.102797	7.04946	-3.03074	0.00402901	0.0451578	-2.12829	-2.87588	0.0246339
BMP8A	0.316364	1.62753	2.98136	0.00402948	0.0451578	-1.88149	2.87584	0.0246339
CSTF3	-0.140077	6.27415	-2.96554	0.00403091	0.0451578	-2.17941	-2.87573	0.0246339
DOK3	-0.328163	-0.285921	-2.93566	0.00403355	0.0451592	-2.04884	-2.87553	0.0246346
WDFY3-AS1	0.359857	2.69495	2.93926	0.0040499	0.0453141	-2.01585	2.87425	0.0247191
TMEM246	0.618325	0.829503	3.05273	0.00405469	0.0453395	-1.70834	2.87388	0.024733
AC008119.1	0.29905	3.53572	2.94446	0.00407609	0.0455505	-2.0522	2.87221	0.0248481
AC024475.1	0.393356	0.198442	3.07765	0.00408081	0.0455749	-1.66261	2.87185	0.0248614
CHD8	-0.1034	5.44812	-3.13183	0.00408565	0.0456007	-1.85714	-2.87147	0.0248755
NADK2	-0.150118	4.36228	-3.23305	0.00409056	0.0456198	-1.51318	-2.87109	0.0248859
TLCD5	-0.192955	6.45161	-2.95004	0.00409269	0.0456198	-2.2267	-2.87093	0.0248859
ZDHHC17	-0.102078	6.66056	-3.2106	0.00409496	0.0456198	-1.70015	-2.87075	0.0248859
LAT2	0.255379	2.09346	3.21272	0.00410226	0.0456583	-1.31839	2.87019	0.0249069
MAD2L1BP	-0.290576	3.0126	-2.93223	0.00410381	0.0456583	-2.02992	-2.87007	0.0249069
SCRT1	0.491812	1.56727	3.06305	0.00411255	0.0456583	-1.68426	2.8694	0.0249069
IGFL4	-0.269074	6.64255	-2.99308	0.00411459	0.0456583	-2.15172	-2.86924	0.0249069
AHCTF1	-0.129601	5.90955	-3.18948	0.00411474	0.0456583	-1.72849	-2.86923	0.0249069
TGFBRAP1	-0.139351	3.6113	-3.62566	0.00411554	0.0456583	-0.443644	-2.86917	0.0249069
LRFN1	0.628247	-0.644681	2.94371	0.00411617	0.0456583	-2.15194	2.86912	0.0249069
FZD10-AS1	-0.546935	0.407497	-3.04881	0.00413006	0.0457842	-1.71319	-2.86805	0.0249756
UCHL1	0.787933	3.94359	3.05323	0.00413584	0.04582	-1.87193	2.86761	0.0249951
CCBE1	-1.08625	3.26335	-3.70293	0.00414261	0.0458487	-0.0842882	-2.86709	0.0250108
IDI2-AS1	0.286549	3.43605	3.19637	0.00414352	0.0458487	-1.45205	2.86702	0.0250108
UFM1	-0.149508	4.73171	-2.99112	0.00414686	0.0458575	-2.05989	-2.86677	0.0250156
FAM184A	-0.144198	5.96286	-3.09044	0.00415819	0.0459444	-1.938	-2.8659	0.025063
DNAAF1	0.240433	5.0939	3.09771	0.00415983	0.0459444	-1.83766	2.86578	0.025063
GMPPB	0.274265	1.70603	3.41479	0.0041788	0.0461256	-0.750353	2.86434	0.0251619
ADAMTSL1	-0.540203	2.03657	-3.86374	0.00420181	0.0463512	0.568768	-2.8626	0.0252849
PLPP3	0.22713	2.71403	2.92137	0.0042093	0.0464055	-2.33524	2.86203	0.0253145
VDAC3	0.174016	6.75013	3.52983	0.00421353	0.0464057	-0.967525	2.86172	0.0253146
AP006623.1	0.246144	2.49056	2.97435	0.00421448	0.0464057	-1.92427	2.86165	0.0253146
FAM138D	0.416511	3.86631	3.18967	0.00422273	0.0464527	-1.6964	2.86103	0.0253403
CCNT2	-0.0992719	5.96638	-3.0457	0.00422391	0.0464527	-2.06588	-2.86094	0.0253403
ZADH2	-0.209051	4.93699	-3.03227	0.00423511	0.0464958	-1.96421	-2.8601	0.0253638
AC008969.1	-0.187068	4.93192	-3.03219	0.0042367	0.0464958	-1.9629	-2.85998	0.0253638
ZFAND5	-0.178356	5.21614	-2.93329	0.00423778	0.0464958	-2.20182	-2.8599	0.0253638
BNIP2	-0.14354	5.51285	-3.00951	0.00423816	0.0464958	-2.07608	-2.85987	0.0253638
LENG9	0.408872	4.63154	2.92693	0.00424214	0.0465111	-2.16577	2.85957	0.0253721
MSH6	-0.121522	5.15211	-3.07368	0.00424482	0.0465122	-1.91574	-2.85937	0.0253727
AC104237.2	-0.401282	0.263219	-3.0512	0.00426162	0.0466679	-1.73084	-2.85812	0.0254576
FUBP1	-0.109195	6.84313	-2.98543	0.00426595	0.046681	-2.21507	-2.8578	0.0254648
AL627171.1	0.32893	1.75523	3.1951	0.00427046	0.046681	-1.34891	2.85746	0.0254648
RAD54L	0.391683	-0.075137	3.03847	0.00427106	0.046681	-1.79375	2.85742	0.0254648
MAF1	-0.304721	3.44545	-2.91677	0.00427319	0.046681	-2.08921	-2.85726	0.0254648
RASA2	-0.139667	7.94878	-2.99186	0.004294	0.0468798	-2.24903	-2.85572	0.0255733
AC108861.1	1.3825	-0.432654	3.01882	0.00429684	0.0468801	-1.90089	2.85551	0.0255734
FGD5-AS1	-0.224308	4.47909	-2.92462	0.00429923	0.0468801	-2.16454	-2.85533	0.0255734
PTPN4	-0.1197	7.48124	-3.02772	0.00430365	0.0468999	-2.15837	-2.855	0.0255842
STXBP4	-0.130847	6.89557	-3.14258	0.00431273	0.0469184	-1.95397	-2.85433	0.0255943
ATRX	-0.129721	8.6237	-3.10188	0.00431749	0.0469184	-2.09126	-2.85398	0.0255943
INO80D	-0.101698	5.97268	-3.73002	0.00431757	0.0469184	-0.171499	-2.85398	0.0255943
AC068389.3	0.310707	1.43935	3.00116	0.00431964	0.0469184	-1.8336	2.85382	0.0255943
FBXO41	0.41126	0.390996	3.03189	0.00432016	0.0469184	-1.77503	2.85379	0.0255943
OPN1MW	1.22798	-1.51594	3.05106	0.00432098	0.0469184	-1.76208	2.85373	0.0255943
ATP11A-AS1	0.339402	1.36106	3.02369	0.00432639	0.0469487	-1.77637	2.85333	0.0256108
CEACAM1	0.297694	4.30168	3.16443	0.00433007	0.0469604	-1.58363	2.85306	0.0256172
RAB29	0.524116	-0.208432	3.06836	0.00434173	0.0470524	-1.68752	2.8522	0.0256674
AC021321.2	-0.270123	0.140229	-3.54085	0.00434378	0.0470524	-0.372735	-2.85205	0.0256674
TAF12	0.132046	5.31598	2.94965	0.00435261	0.0471035	-2.1834	2.85141	0.0256953
LYNX1	0.635038	0.273352	3.08279	0.00435411	0.0471035	-1.64073	2.8513	0.0256953
GPR107	0.13266	5.79556	2.92229	0.00435635	0.0471035	-2.25146	2.85113	0.0256953
CREBL2	-0.133503	4.25418	-2.93411	0.00437343	0.0472599	-2.14055	-2.84989	0.0257806
AC016597.1	0.326889	3.11807	2.98369	0.00439444	0.0474584	-1.93154	2.84837	0.0258889
SNX25	-0.17131	6.68615	-2.9067	0.00439717	0.0474594	-2.82458	-2.84817	0.0258894
AC105219.1	-0.226615	-0.0202034	-2.90615	0.00440437	0.0474904	-2.13529	-2.84765	0.0259064
VTA1	-0.134452	5.20111	-3.24973	0.00440762	0.0474904	-1.48837	-2.84741	0.0259064
SLC5A3	-0.245066	3.54901	-2.9148	0.00440796	0.0474904	-2.12178	-2.84739	0.0259064
INTS7	-0.167692	4.58226	-3.64942	0.00442122	0.0475722	-0.286216	-2.84643	0.0259509
AL157834.2	-0.433748	2.60236	-2.92623	0.00442384	0.0475722	-2.0375	-2.84624	0.0259509
AC007496.2	0.253357	0.127308	3.21946	0.00442513	0.0475722	-1.27184	2.84615	0.0259509
SYS1	-0.156306	4.29704	-2.96765	0.00442949	0.0475722	-2.08487	-2.84584	0.0259509
SPIN2A	0.451687	0.833464	2.91691	0.00443222	0.0475722	-2.05522	2.84564	0.0259509
AC136604.2	0.278285	3.58906	2.97888	0.00443275	0.0475722	-1.97535	2.8456	0.0259509
SNX2	-0.0608362	6.2417	-2.90389	0.00443404	0.0475722	-2.80066	-2.84551	0.0259509
SAMSN1	-0.526803	1.10047	-2.90172	0.00446273	0.0478514	-2.29916	-2.84345	0.0261033
RBM4B	-0.13641	5.17467	-2.94387	0.00446842	0.0478839	-2.19582	-2.84305	0.026121
HEATR6	-0.177103	4.15488	-3.0915	0.00449669	0.0481355	-1.77343	-2.84104	0.0262583
Z99496.2	0.356509	1.33233	3.07025	0.00449725	0.0481355	-1.65949	2.841	0.0262583
HELLS	-0.146066	2.67295	-3.3577	0.00450432	0.0481807	-1.11148	-2.8405	0.0262829
LCOR	-0.107178	8.13204	-3.18043	0.00450929	0.0481807	-1.92392	-2.84015	0.0262829
PRDM2	-0.0991895	6.55788	-2.93625	0.00451124	0.0481807	-2.2862	-2.84001	0.0262829
AC064836.4	0.273496	3.4545	2.97648	0.00451218	0.0481807	-1.98314	2.83994	0.0262829
PSMD6-AS2	-0.214383	3.98345	-2.99268	0.00451824	0.0481979	-1.99914	-2.83951	0.0262923
AGTPBP1	-0.158603	8.84161	-3.06109	0.00452024	0.0481979	-2.17588	-2.83937	0.0262923
PRDM8	0.569222	1.16173	2.96671	0.00452182	0.0481979	-1.91655	2.83926	0.0262923
NRL	-0.351346	9.52182	-2.89735	0.00452817	0.0482371	-2.43892	-2.83881	0.0263137
SNHG29	-0.299535	6.13382	-2.89647	0.00453271	0.0482569	-2.31221	-2.83849	0.0263245
BPGM	-0.282685	3.04314	-2.90614	0.00453719	0.048276	-2.10689	-2.83818	0.0263349
C11orf96	1.01974	-0.678197	3.05859	0.00455434	0.0484299	-1.74319	2.83697	0.0264188
PNMA6A	0.794014	0.88728	2.99919	0.00456305	0.0484628	-1.83556	2.83636	0.0264368
WWC2	-0.145291	8.31463	-2.95399	0.00456711	0.0484628	-2.32823	-2.83608	0.0264368
AC124248.2	0.463012	-0.347399	2.91968	0.00456782	0.0484628	-2.15297	2.83603	0.0264368
IGSF8	0.461476	2.0283	3.01633	0.0045682	0.0484628	-1.82997	2.836	0.0264368
GALC	0.155394	5.10968	2.9695	0.00457398	0.0484955	-2.13316	2.8356	0.0264546
KIAA0408	-0.237632	4.22688	-3.6225	0.00459836	0.0486649	-0.433509	-2.8339	0.026547
C18orf21	-0.237808	2.9304	-2.93475	0.0045997	0.0486649	-2.04409	-2.83381	0.026547
RAPGEFL1	0.27643	2.97223	3.04701	0.00460034	0.0486649	-1.78567	2.83376	0.026547
AL035587.2	0.267958	1.89846	2.98182	0.00460294	0.0486649	-1.88927	2.83358	0.026547
RAB15	0.330216	1.94594	3.09668	0.00460347	0.0486649	-1.62375	2.83355	0.026547
TEX10	-0.139364	4.20867	-3.9374	0.00461093	0.0487151	0.550421	-2.83303	0.0265744
AC137810.1	0.394488	4.37972	2.92445	0.00461483	0.0487277	-2.17484	2.83276	0.0265813
AC004034.1	0.287709	3.6043	3.97496	0.00462183	0.048748	0.87853	2.83227	0.0265923
SYT2	0.3244	2.69442	2.93632	0.00462216	0.048748	-2.03198	2.83225	0.0265923
AMER1	-0.379628	-0.388747	-3.14832	0.00462504	0.0487498	-1.47605	-2.83205	0.0265933
RCVRN	-0.333371	9.78159	-2.89622	0.00463267	0.0488016	-2.47272	-2.83152	0.0266216
CFAP20	-0.154562	4.39635	-2.90788	0.00464086	0.0488593	-2.21228	-2.83096	0.0266531
PDE4A	0.525289	0.531651	2.95347	0.00464695	0.0488772	-1.96376	2.83054	0.0266629
TMED5	-0.169615	3.6788	-3.00691	0.00464799	0.0488772	-1.97082	-2.83047	0.0266629
RPF1	-0.147969	4.24961	-2.92233	0.00466227	0.0489988	-2.17681	-2.82949	0.0267292
TRIM33	-0.108642	6.86301	-2.95442	0.0046686	0.0490366	-2.28487	-2.82905	0.0267498
AC073254.1	0.294907	-0.00538638	3.15168	0.00467682	0.0490943	-1.4528	2.82849	0.0267813
HERC3	-0.178882	8.42984	-3.09682	0.00468706	0.0491731	-2.1301	-2.82779	0.0268243
TSPYL5	-0.222299	2.59768	-2.91785	0.00469492	0.049227	-2.06204	-2.82725	0.0268537
LINC00960	0.261817	5.49024	3.18087	0.00473238	0.0495908	-1.73179	2.82471	0.0270521
CLNK	0.396941	0.00429717	3.02588	0.00473836	0.0496246	-1.81087	2.8243	0.0270706
CASP9	0.166915	4.33652	2.90518	0.00474561	0.0496673	-2.21204	2.82381	0.0270938
AL451047.1	0.355736	0.663889	2.98326	0.00474795	0.0496673	-1.89052	2.82365	0.0270938
CD55	0.274802	2.40441	2.88056	0.00475106	0.049671	-2.40204	2.82344	0.0270959
SLK	-0.12867	5.2522	-3.10067	0.00475555	0.049689	-1.92379	-2.82314	0.0271057
MIR600HG	-0.281127	1.04705	-3.09081	0.00476188	0.0497238	-1.60693	-2.82272	0.0271247
AC243964.3	0.327194	4.68777	3.31667	0.0047644	0.0497238	-1.35967	2.82255	0.0271247
DUSP1	0.495389	4.34217	3.01631	0.00477953	0.0498138	-1.99451	2.82153	0.0271738
PPP1R15A	0.398953	1.9792	2.90099	0.00478085	0.0498138	-2.07876	2.82144	0.0271738
ZNF770	-0.251466	4.24547	-2.95653	0.00478509	0.0498138	-2.11848	-2.82116	0.0271738
AC010082.1	0.387989	-0.44613	2.8797	0.00478515	0.0498138	-2.27371	2.82115	0.0271738
FBLL1	0.613445	-0.472624	3.03005	0.00478686	0.0498138	-1.76708	2.82104	0.0271738
AC239799.2	0.588462	-0.826415	2.95144	0.0047979	0.0498999	-2.079	2.8203	0.0272207
ZSWIM7	0.114515	5.57358	3.04372	0.00481568	0.0500331	-2.00706	2.81911	0.0272934
EEF1A2	0.666174	2.86603	2.94706	0.00481628	0.0500331	-2.04801	2.81907	0.0272934
LCMT1	0.1176	5.33065	2.88045	0.00482008	0.0500437	-2.32416	2.81882	0.0272992
AC016493.1	0.392645	3.44006	2.8761	0.00482811	0.0500571	-2.20405	2.81828	0.0273065
PAIP1	-0.120041	6.01782	-2.91011	0.00483267	0.0500571	-2.33014	-2.81798	0.0273065
MORC2-AS1	0.206946	2.98066	3.17541	0.00483374	0.0500571	-1.62005	2.81791	0.0273065
LINC00891	-0.385507	1.76529	-2.91738	0.00483516	0.0500571	-2.03873	-2.81782	0.0273065
CLASP1	-0.147888	9.70549	-2.96295	0.00483527	0.0500571	-2.36839	-2.81781	0.0273065
LINC01500	0.606286	1.23163	2.87421	0.00484093	0.0500869	-2.24545	2.81743	0.0273227
SPAG5	-0.149505	1.17696	-2.87393	0.00484485	0.0500987	-2.31552	-2.81717	0.0273292
LINC00641	-0.312836	3.36776	-2.92164	0.00485576	0.0501629	-2.11757	-2.81645	0.0273642
ZNF747	-0.247194	1.72831	-2.88331	0.00485663	0.0501629	-2.11675	-2.81639	0.0273642
EXOSC10	-0.162007	5.80313	-2.93017	0.0048621	0.0501906	-2.30239	-2.81603	0.0273793
AL591506.1	0.39853	1.93629	3.01853	0.00488546	0.0504028	-1.80008	2.81449	0.0274951
CASKIN1	0.259302	2.70385	3.10856	0.0048896	0.0504166	-1.73797	2.81422	0.0275026
VPREB3	-0.542113	-0.257151	-2.88157	0.00489541	0.0504476	-2.22915	-2.81384	0.0275195
THAP5	-0.242373	4.41772	-2.87497	0.00489829	0.0504485	-2.2794	-2.81365	0.02752
XRN2	-0.102201	5.97309	-3.2241	0.00490343	0.0504726	-1.62577	-2.81331	0.0275331
CPLX2	0.493103	1.48319	2.9543	0.00491147	0.0505173	-1.95167	2.81278	0.0275575
WIPI1	0.25624	4.70268	3.3862	0.00491397	0.0505173	-1.15324	2.81262	0.0275575
STAC3	0.310539	2.61432	4.20988	0.0049162	0.0505173	1.74565	2.81247	0.0275575
PAQR8	0.565428	-0.514748	3.00737	0.00493423	0.0506737	-1.89729	2.8113	0.0276429
C12orf29	-0.158548	3.77117	-2.98088	0.00493917	0.0506954	-2.02835	-2.81097	0.0276547
DHCR24	0.765498	1.18295	2.97695	0.00494274	0.0507032	-1.89119	2.81074	0.0276589
TM6SF1	0.285486	1.93435	2.89859	0.00495018	0.0507457	-2.084	2.81026	0.0276821
NEPRO	-0.111742	4.44252	-3.54414	0.00495252	0.0507457	-0.705494	-2.81011	0.0276821
KCTD9	-0.144607	4.60169	-3.08247	0.00496891	0.0508843	-1.95447	-2.80904	0.0277577
HOOK1	-0.139362	6.92338	-3.05206	0.0049717	0.0508843	-2.18015	-2.80886	0.0277577
KCTD2	0.142173	4.32645	3.29839	0.00497453	0.0508844	-1.39981	2.80868	0.0277578
ACAD9	0.121865	4.53995	2.8701	0.00498032	0.0509147	-2.29857	2.8083	0.0277743
AC027307.2	-0.377028	0.964099	-2.86634	0.0049954	0.0510269	-2.17623	-2.80733	0.0278355
LINC00599	0.172846	8.90423	2.90712	0.00499697	0.0510269	-2.45203	2.80723	0.0278355
SLFNL1-AS1	0.303401	4.24662	2.97448	0.00500326	0.0510583	-2.04814	2.80682	0.0278527
PSMC2	-0.113012	5.76953	-2.8932	0.00500572	0.0510583	-2.35179	-2.80667	0.0278527
TCERG1L	0.396707	4.05972	2.93005	0.00502596	0.0512358	-2.17868	2.80537	0.0279495
PXN-AS1	0.23959	4.46204	2.89521	0.00503099	0.0512358	-2.25348	2.80504	0.0279495
TKFC	0.132088	2.91523	2.86105	0.005032	0.0512358	-2.53003	2.80498	0.0279495
DCAF6	-0.0858342	6.45836	-3.2146	0.00503451	0.0512358	-1.93323	-2.80482	0.0279495
CHGA	0.583452	2.09881	3.03369	0.00504793	0.0513434	-1.80116	2.80396	0.0280082
RP1	-0.206138	10.1607	-2.90547	0.00505774	0.0514062	-2.50326	-2.80333	0.0280424
ANKUB1	0.286086	6.75501	2.86864	0.00505981	0.0514062	-2.43354	2.8032	0.0280424
PRRC2C	-0.116364	7.41525	-3.25084	0.0050704	0.0514847	-1.67471	-2.80253	0.0280853
HCP5	0.522725	-0.477669	3.12968	0.00507327	0.0514848	-1.50333	2.80234	0.0280853
MYH7B	0.210525	3.45963	3.1834	0.00507616	0.0514852	-1.53648	2.80216	0.0280855
MRGPRE	0.839488	-1.9914	2.93934	0.00508058	0.0515009	-2.20205	2.80188	0.0280941
P2RY1	0.624115	0.215929	2.8891	0.00509578	0.0515683	-2.14589	2.80092	0.0281309
GYG1	0.589895	0.841882	2.91215	0.00509721	0.0515683	-2.05243	2.80083	0.0281309
CHKB	0.162421	5.44795	2.88573	0.00509798	0.0515683	-2.35124	2.80078	0.0281309
TBCEL	-0.129029	5.42133	-3.02272	0.00509868	0.0515683	-2.11214	-2.80073	0.0281309
CEP57L1	-0.114776	5.74751	-2.96039	0.00511844	0.0517391	-2.22043	-2.79948	0.028224
UQCC3	-0.335506	3.60723	-2.85598	0.00513162	0.0517854	-2.26248	-2.79865	0.0282493
FCSK	0.141585	4.00093	2.86648	0.00513245	0.0517854	-2.27383	2.7986	0.0282493
CPLX1	0.621607	2.47763	2.89358	0.00513449	0.0517854	-2.12736	2.79847	0.0282493
OSGIN2	-0.115546	2.9107	-2.85418	0.00513453	0.0517854	-2.57242	-2.79847	0.0282493
AC022973.4	0.416174	2.21005	2.85609	0.00514888	0.0519003	-2.19233	2.79757	0.028312
GMCL1	-0.115887	5.96242	-2.98705	0.0051535	0.0519003	-2.21091	-2.79728	0.028312
MAP9	-0.118331	6.0654	-2.96614	0.00515681	0.0519003	-2.27318	-2.79707	0.028312
HSPA12B	0.368648	0.791059	3.25159	0.00515746	0.0519003	-1.2109	2.79703	0.028312
ATF2	-0.0966378	6.28255	-3.06384	0.00517344	0.0519746	-2.07085	-2.79603	0.0283525
TAB3	-0.1153	5.68724	-2.93348	0.00517367	0.0519746	-2.29747	-2.79602	0.0283525
ADAMTS3	-0.215599	7.99991	-2.94779	0.00517573	0.0519746	-2.39894	-2.79589	0.0283525
GALNT9	0.784063	-1.0095	2.98719	0.00517639	0.0519746	-1.95291	2.79585	0.0283525
TSN	-0.154454	4.79203	-2.96093	0.0051835	0.0519775	-2.15899	-2.7954	0.0283541
ADAM10	-0.118253	6.59521	-3.22974	0.00518698	0.0519775	-1.7057	-2.79519	0.0283541
PCLO	-0.135406	8.13509	-2.87721	0.00518943	0.0519775	-2.51173	-2.79503	0.0283541
SNTG2-AS1	0.392791	2.67095	2.89864	0.00518986	0.0519775	-2.12583	2.79501	0.0283541
NPTN	-0.137643	7.55933	-3.22792	0.00519197	0.0519775	-1.77234	-2.79488	0.0283541
MESP1	-0.395352	2.19129	-2.85279	0.00519892	0.0519775	-2.19399	-2.79444	0.0283541
AL713852.1	0.384695	0.120532	3.01568	0.00520165	0.0519775	-1.79826	2.79427	0.0283541
FIGNL1	-0.264816	3.87084	-2.90971	0.00520224	0.0519775	-2.19028	-2.79424	0.0283541
CEP170	-0.118125	5.84426	-3.18031	0.00520514	0.0519775	-1.76417	-2.79406	0.0283541
CNNM4	-0.134223	6.67328	-2.8532	0.00520555	0.0519775	-2.47143	-2.79403	0.0283541
PCNA	-0.312652	5.2289	-2.85068	0.00520865	0.0519797	-2.39266	-2.79384	0.0283553
AC007786.1	0.271396	1.38361	2.96452	0.00521504	0.0520146	-1.92277	2.79344	0.0283743
MED28	-0.123336	4.92027	-2.90105	0.00522456	0.0520807	-2.28757	-2.79285	0.0284104
XIAP	-0.151205	7.20096	-2.85959	0.005234	0.0521433	-2.48667	-2.79227	0.0284445
SH3BGRL2	-0.193344	5.686	-2.97068	0.00523664	0.0521433	-2.24702	-2.79211	0.0284445
C7orf69	0.231326	0.259089	2.84726	0.00523978	0.0521458	-2.27148	2.79191	0.0284459
SMARCE1	-0.107906	5.22596	-2.97543	0.00524679	0.0521733	-2.1886	-2.79148	0.0284609
AC027288.3	0.438757	7.55028	2.88017	0.00524834	0.0521733	-2.47051	2.79138	0.0284609
NAGPA-AS1	0.292413	0.72328	2.95676	0.00525192	0.0521779	-1.94473	2.79116	0.0284634
MRPL44	-0.263339	2.8622	-2.85813	0.0052546	0.0521779	-2.2125	-2.791	0.0284634
PHYHD1	0.155719	6.73424	2.91271	0.00527281	0.0523283	-2.38634	2.78988	0.0285455
ZNHIT2	-0.36327	2.08163	-2.8452	0.00527731	0.0523283	-2.20718	-2.7896	0.0285455
SCP2	-0.174606	6.30111	-2.89791	0.00527847	0.0523283	-2.38964	-2.78953	0.0285455
CFAP97	-0.211309	5.57535	-2.90887	0.00529239	0.0524374	-2.33616	-2.78868	0.028605
AC083973.1	0.364847	0.287499	2.85406	0.00529799	0.0524385	-2.24075	2.78833	0.0286056
LSR	0.173868	4.31463	3.14471	0.00529832	0.0524385	-1.69817	2.78831	0.0286056
RNFT2	0.170601	5.37708	2.89472	0.00532283	0.0526521	-2.34288	2.78682	0.0287221
CPNE4	-0.529668	3.48876	-3.60865	0.00532607	0.0526552	-0.440279	-2.78662	0.0287238
AL109936.6	0.25739	3.0967	2.95735	0.00534798	0.0528159	-2.0358	2.78529	0.0288115
C6orf120	-0.308812	3.64663	-2.84769	0.00534819	0.0528159	-2.28983	-2.78528	0.0288115
AL023581.1	0.347292	1.90235	2.97307	0.00535553	0.052856	-1.92492	2.78483	0.0288333
LRR1	-0.217669	2.78197	-2.87734	0.00535812	0.052856	-2.17331	-2.78468	0.0288333
RPS3	-0.393144	6.82404	-2.8381	0.00538227	0.0530108	-2.48935	-2.78322	0.0289177
AC018752.1	0.267281	3.12989	3.02488	0.0053826	0.0530108	-1.92406	2.7832	0.0289177
TRAPPC6A	0.216223	3.03351	2.92998	0.00538264	0.0530108	-2.10384	2.7832	0.0289177
AC079193.2	-0.295774	2.90737	-2.86699	0.00539262	0.05308	-2.21077	-2.78259	0.0289555
AC012557.2	-0.374617	-0.418537	-2.98956	0.00539646	0.0530888	-1.91116	-2.78236	0.0289603
HLA-DPB1	0.717015	1.7408	3.03068	0.00541404	0.0532246	-1.84643	2.78131	0.0290344
RTEL1	0.174148	3.45724	2.84423	0.00541618	0.0532246	-2.29026	2.78118	0.0290344
PICALM	-0.0950343	7.31559	-2.83547	0.00542355	0.053268	-3.0375	-2.78074	0.0290581
ZNF710-AS1	0.323463	-0.433771	3.07475	0.00543232	0.053325	-1.64411	2.78021	0.0290892
GP6	0.332238	3.2849	3.48996	0.00543923	0.0533391	-0.745063	2.7798	0.0290969
GORAB	-0.143694	3.69314	-2.83445	0.00543968	0.0533391	-2.76553	-2.77977	0.0290969
AP001011.1	0.304137	6.40097	2.8823	0.00544648	0.0533767	-2.4204	2.77937	0.0291173
TBC1D30	0.280592	1.65121	3.04343	0.00545121	0.0533811	-1.78339	2.77909	0.0291198
PDCD4	-0.151589	8.80449	-2.95348	0.00545286	0.0533811	-2.42894	-2.77899	0.0291198
STX17-AS1	0.285443	2.28949	2.9047	0.00545824	0.0534047	-2.08715	2.77867	0.0291326
CAV1	0.833823	2.74446	2.94831	0.00546907	0.0534816	-2.03021	2.77802	0.0291746
AC079145.1	0.263315	1.39416	2.99736	0.00547424	0.0535024	-1.84525	2.77772	0.0291859
ANKRD12	-0.13895	9.23521	-3.17963	0.00547812	0.0535024	-2.12182	-2.77749	0.0291859
SMCR5	0.247122	3.6671	2.90687	0.00548345	0.0535024	-2.18616	2.77717	0.0291859
AC124069.1	0.248959	0.492639	2.94865	0.00548357	0.0535024	-1.96099	2.77716	0.0291859
DDX19B	0.143106	4.70989	2.85897	0.00548606	0.0535024	-2.36641	2.77702	0.0291859
DEFB119	0.35512	6.89556	3.09812	0.0054984	0.0535724	-2.08049	2.77628	0.0292241
ZFYVE28	-0.187259	6.92216	-2.86913	0.00549918	0.0535724	-2.49097	-2.77624	0.0292241
ATP6V1D	0.0716985	6.88627	2.82957	0.00551765	0.0536946	-3.02388	2.77515	0.0292907
AC115618.1	0.200672	1.16412	2.82939	0.00552049	0.0536946	-2.36888	2.77498	0.0292907
RAPGEF4	-0.222838	6.73583	-2.82938	0.00552067	0.0536946	-3.03564	-2.77497	0.0292907
PUS7L	-0.0999411	6.42805	-3.22332	0.00552559	0.0537127	-1.80829	-2.77468	0.0293006
AP002748.4	0.218581	0.972912	2.82872	0.0055313	0.0537127	-2.36854	2.77434	0.0293006
LINC02696	0.232913	1.11048	2.82871	0.00553148	0.0537127	-2.37729	2.77433	0.0293006
BRMS1L	-0.150004	4.54876	-3.36458	0.0055386	0.0537283	-1.24472	-2.77392	0.0293092
COMMD8	-0.278171	3.47091	-2.83623	0.00553906	0.0537283	-2.31122	-2.77389	0.0293092
ATAD2B	-0.113628	7.44087	-2.83854	0.00556641	0.0539366	-2.54929	-2.77229	0.0294228
AP002336.2	0.23113	6.79561	2.94724	0.00556653	0.0539366	-2.34769	2.77228	0.0294228
ATF6	-0.120798	6.42267	-2.95295	0.00557738	0.0539615	-2.2648	-2.77165	0.0294364
HRK	0.656514	-0.573564	2.98444	0.00557991	0.0539615	-1.87167	2.7715	0.0294364
SMPDL3A	-0.190151	2.92794	-3.37408	0.00558251	0.0539615	-0.915254	-2.77135	0.0294364
AC069185.1	0.367901	1.98288	2.87653	0.005584	0.0539615	-2.13545	2.77126	0.0294364
PPP5D1	0.234776	2.67233	2.89974	0.00558651	0.0539615	-2.1237	2.77111	0.0294364
CRYGS	-0.22689	2.81261	-2.88824	0.00558709	0.0539615	-2.17551	-2.77108	0.0294364
EMB	0.259561	4.36358	2.9121	0.00559413	0.0540006	-2.24542	2.77067	0.0294577
RASSF8	-0.126416	5.78606	-2.99287	0.00560926	0.0540928	-2.23861	-2.76979	0.029508
PGBD1	-0.0973998	3.75803	-2.82389	0.00560969	0.0540928	-2.80163	-2.76976	0.029508
RNF150	-0.17867	9.04826	-2.95332	0.00561542	0.0541191	-2.48865	-2.76943	0.0295223
UTP15	-0.146029	2.19363	-2.82315	0.00562172	0.0541427	-2.58284	-2.76907	0.0295352
ANXA11	0.851561	-0.120897	2.96699	0.00562389	0.0541427	-1.92855	2.76894	0.0295352
EPB41L1	0.588215	2.08039	2.90013	0.00564144	0.0542826	-2.10262	2.76793	0.0296115
EBF3	0.581301	-0.24889	2.88752	0.00565448	0.0543048	-2.15487	2.76717	0.0296236
AC010201.3	0.211279	4.41057	3.17267	0.00565812	0.0543048	-1.7762	2.76696	0.0296236
FBXL16	0.277839	2.1736	2.9051	0.00565872	0.0543048	-2.09911	2.76693	0.0296236
AL355095.1	-0.248923	3.33528	-2.82089	0.00565893	0.0543048	-2.75247	-2.76692	0.0296236
SMIM10L2A	-0.329491	0.937282	-2.84319	0.00565992	0.0543048	-2.21856	-2.76686	0.0296236
SRF	-0.125132	1.96095	-2.82071	0.00566184	0.0543048	-2.54224	-2.76675	0.0296236
KCTD17	0.651907	0.149867	2.89349	0.00567809	0.0544316	-2.1073	2.76581	0.0296928
MYCBP2-AS1	0.230073	4.88699	2.81924	0.00568607	0.0544792	-2.43401	2.76536	0.0297188
C9orf40	-0.25263	3.79949	-2.82394	0.00569571	0.0545158	-2.35179	-2.7648	0.0297387
NPPA	0.241113	0.86553	2.81864	0.00569595	0.0545158	-2.37557	2.76479	0.0297387
HDAC2	-0.119651	4.73053	-2.97894	0.0057061	0.0545632	-2.16086	-2.76421	0.0297646
GPR85	0.54859	0.947758	2.86004	0.00570754	0.0545632	-2.17647	2.76413	0.0297646
CCDC157	0.181734	4.06677	2.84527	0.0057112	0.0545632	-2.34329	2.76392	0.0297646
POLE2	0.118348	5.84132	2.81761	0.00571303	0.0545632	-2.99622	2.76381	0.0297646
TNS2	0.3407	2.63533	3.03469	0.00573874	0.0547797	-1.85598	2.76235	0.0298827
ZC3HAV1	0.590806	0.117644	2.84693	0.00574724	0.0548318	-2.25589	2.76186	0.0299111
RFX7	-0.110223	7.2778	-2.88087	0.00575945	0.0549155	-2.48283	-2.76117	0.0299568
AC020656.1	0.271036	0.0292428	3.1208	0.00576211	0.0549155	-1.52619	2.76102	0.0299568
GAREM1	0.189442	5.35502	2.81947	0.00576516	0.0549155	-2.48461	2.76085	0.0299568
STYX	-0.0822877	4.05201	-2.8122	0.00580363	0.0552311	-2.84766	-2.75867	0.0301289
AL158068.2	0.158682	2.99577	2.81198	0.00580726	0.0552311	-2.6557	2.75847	0.0301289
RYBP	-0.117562	7.1461	-2.81197	0.0058075	0.0552311	-3.09492	-2.75846	0.0301289
VPS13A	-0.176236	6.51207	-3.2235	0.00582419	0.0553605	-1.73229	-2.75752	0.0301995
PLXNA4	0.447241	4.20602	4.00097	0.00582893	0.0553764	0.935644	2.75725	0.0302082
FZR1	0.153084	3.78144	2.83352	0.00584448	0.0554848	-2.35664	2.75638	0.0302673
GMEB2	0.140896	3.45557	2.83143	0.00584651	0.0554848	-2.3301	2.75627	0.0302673
SLC35F5	-0.111922	6.00691	-2.96556	0.00585347	0.0555216	-2.32806	-2.75588	0.0302874
ATP5F1A	-0.181865	6.98551	-2.81247	0.00586415	0.0555853	-2.59238	-2.75528	0.0303222
MMUT	-0.108684	4.69822	-2.84221	0.0058694	0.0555853	-2.41145	-2.75499	0.0303222
SLC52A1	0.185583	-0.122579	2.80831	0.00586945	0.0555853	-2.32511	2.75499	0.0303222
SHC2	0.555109	0.38367	2.92281	0.00587638	0.0556217	-2.02693	2.7546	0.030342
TBC1D8	-0.154375	5.81494	-3.2416	0.00588674	0.0556904	-1.62901	-2.75402	0.0303795
PTH1R	0.639687	-1.29251	2.93809	0.0058964	0.0557526	-2.06629	2.75349	0.0304134
PDE9A	-0.692496	0.908241	-2.80557	0.00591627	0.0558731	-2.50525	-2.75239	0.0304792
ZNF358	-0.249046	3.9762	-2.82467	0.00591662	0.0558731	-2.38684	-2.75237	0.0304792
AC022217.2	0.663858	-0.918724	2.87487	0.00591846	0.0558731	-2.27854	2.75226	0.0304792
PSMD14	-0.080071	5.96302	-2.80476	0.00593009	0.0559536	-3.04914	-2.75162	0.0305231
PLCG1-AS1	0.240217	2.75282	2.80992	0.0059358	0.0559781	-2.32243	2.75131	0.0305364
NRCAM	0.535825	6.37726	2.88626	0.00594825	0.0560628	-2.43897	2.75062	0.0305826
LRRC75A	0.242152	3.54259	2.88522	0.00595602	0.0560628	-2.25945	2.75019	0.0305826
BOLA1	-0.26244	2.5231	-2.80404	0.00595673	0.0560628	-2.31623	-2.75015	0.0305826
LINC01801	-0.440218	1.23133	-3.09203	0.00596047	0.0560628	-1.64307	-2.74995	0.0305826
RAB38	-0.185016	4.50457	-3.10206	0.00596465	0.0560628	-1.94589	-2.74972	0.0305826
MIER1	-0.0754979	6.78021	-2.9831	0.00596508	0.0560628	-2.29397	-2.74969	0.0305826
SPDYE2B	0.313192	2.05212	2.80264	0.00596658	0.0560628	-2.55632	2.74961	0.0305826
GAL3ST1	0.450327	-0.430258	3.00098	0.00597616	0.0561235	-1.88173	2.74909	0.0306158
LINC01278	-0.124976	6.76446	-2.87752	0.00598034	0.0561335	-2.49457	-2.74886	0.0306212
AL583810.1	-0.296825	-0.119184	-2.87732	0.00598924	0.0561877	-2.16998	-2.74837	0.0306508
THOC2	-0.108211	7.7602	-2.92977	0.00601561	0.0563777	-2.46427	-2.74693	0.0307544
ZNF184	-0.183059	1.97514	-3.02306	0.00601575	0.0563777	-1.8024	-2.74692	0.0307544
DUSP26	-0.190037	4.75156	-2.80686	0.00602051	0.0563921	-2.48727	-2.74666	0.0307623
TUBB2A	0.626457	4.12838	2.87942	0.00602439	0.0563921	-2.31743	2.74645	0.0307623
DLD	-0.105566	5.54322	-2.92024	0.00602668	0.0563921	-2.36826	-2.74633	0.0307623
DPM1	-0.122438	5.13055	-2.96275	0.00603902	0.0564456	-2.17878	-2.74565	0.0307914
SF3B3	-0.0792145	5.09753	-3.08929	0.00604193	0.0564456	-2.02148	-2.7455	0.0307914
AC107464.1	0.317689	1.87205	2.83118	0.00604836	0.0564456	-2.24682	2.74515	0.0307914
ANKRD65	0.762761	-0.258624	2.84269	0.00604916	0.0564456	-2.26223	2.7451	0.0307914
PAQR4	-0.271729	6.05814	-2.79996	0.00605045	0.0564456	-2.56869	-2.74503	0.0307914
CDKN1B	-0.257449	3.86041	-2.7993	0.00605121	0.0564456	-2.41793	-2.74499	0.0307914
TESMIN	-0.279362	1.22049	-2.82021	0.0060707	0.056598	-2.26513	-2.74394	0.0308746
MRPL10	-0.219257	3.44685	-2.79904	0.00608185	0.056633	-2.38576	-2.74334	0.0308937
MATR3.1	-0.105521	3.84718	-2.79587	0.00608459	0.056633	-2.90191	-2.74319	0.0308937
AC020741.1	0.455511	-0.54528	3.71832	0.00608698	0.056633	0.0635429	2.74306	0.0308937
RIT1	-0.085713	3.82053	-2.79565	0.00608846	0.056633	-2.87443	-2.74298	0.0308937
MPHOSPH10	-0.129028	5.01193	-2.79556	0.00609018	0.056633	-3.00761	-2.74289	0.0308937
AC002429.2	0.325629	7.20279	2.82978	0.00609685	0.0566396	-2.58721	2.74253	0.0308973
HNRNPUL2	-0.141108	4.41004	-2.93757	0.00609804	0.0566396	-2.26723	-2.74246	0.0308973
FKBP9	0.426251	1.13907	2.91331	0.00610033	0.0566396	-2.04625	2.74234	0.0308973
AC023590.1	0.305661	6.54879	2.79639	0.00611358	0.0567077	-2.6006	2.74163	0.0309344
DIRC3	1.16384	-0.5018	2.84178	0.00611396	0.0567077	-2.25903	2.74161	0.0309344
STX6	-0.12102	5.00893	-3.82576	0.00612113	0.0567449	0.103316	-2.74122	0.0309547
ATXN10	-0.106538	6.80492	-2.81416	0.00613781	0.0568703	-2.60386	-2.74033	0.0310231
SCLT1	-0.132033	6.96321	-2.84982	0.00614205	0.0568772	-2.56644	-2.7401	0.0310269
C15orf40	-0.146307	4.54358	-2.79848	0.00614487	0.0568772	-2.47935	-2.73995	0.0310269
ADAM20	-0.242358	1.28499	-2.98264	0.00615151	0.0568951	-1.89172	-2.73959	0.0310367
AL358472.5	0.239652	1.48083	2.93488	0.00615546	0.0568951	-2.01674	2.73938	0.0310367
AL139147.1	0.2643	5.95017	2.79182	0.00615629	0.0568951	-3.0398	2.73934	0.0310367
PCOLCE-AS1	0.301694	0.888922	2.85918	0.00619159	0.0571873	-2.17198	2.73746	0.0311961
LUCAT1	0.300173	5.24314	2.79265	0.00619426	0.0571873	-2.53468	2.73732	0.0311961
AC023424.3	0.347594	6.68361	2.86916	0.00620422	0.0572291	-2.51227	2.73679	0.0312189
MDM2	-0.0582919	5.78979	-2.78908	0.00620515	0.0572291	-3.0775	-2.73674	0.0312189
COQ5	0.152574	3.97526	3.38659	0.00621156	0.0572485	-1.11468	2.7364	0.0312294
SHPRH	-0.123096	7.77905	-2.86011	0.00621361	0.0572485	-2.58244	-2.73629	0.0312294
AXL	0.469271	-0.253087	2.8951	0.00621846	0.0572485	-2.1333	2.73603	0.0312294
2023-03-08	-0.210739	6.58638	-3.68266	0.00621996	0.0572485	-0.483904	-2.73595	0.0312294
LDLR	0.388073	1.44604	2.80939	0.0062264	0.0572528	-2.28782	2.73561	0.0312318
EFR3A	-0.140886	8.0944	-2.91167	0.00622715	0.0572528	-2.57007	-2.73557	0.0312318
MPPED2	-0.318592	5.17994	-2.93856	0.00623049	0.0572528	-2.32554	-2.7354	0.0312318
RBM6	0.118884	8.12727	2.79407	0.00623315	0.0572528	-2.68495	2.73526	0.0312318
RASGRF2	-0.127127	9.11741	-2.87435	0.00624513	0.0573335	-2.63234	-2.73463	0.0312758
TCEAL7	0.748235	1.36978	2.80704	0.00626378	0.0574755	-2.29386	2.73364	0.0313533
SYCP2	-0.247635	1.29457	-3.20989	0.00627563	0.0575318	-1.33722	-2.73302	0.031384
FBXW10	0.237481	0.409696	2.78513	0.00627631	0.0575318	-2.42613	2.73299	0.031384
RPAP2	-0.0977381	7.54301	-2.85053	0.00627974	0.0575339	-2.61932	-2.73281	0.0313851
DLGAP1-AS1	0.68034	-0.415017	3.10427	0.00629576	0.0576514	-1.59107	2.73197	0.0314492
THAP11	-0.341545	2.22855	-2.78306	0.00631498	0.057798	-2.35554	-2.73096	0.0315292
APAF1	-0.124329	4.89052	-2.78257	0.00632267	0.0578157	-3.02909	-2.73056	0.0315389
ANKRD40	-0.177433	3.74047	-2.79183	0.00632334	0.0578157	-2.44032	-2.73053	0.0315389
AC073349.4	0.271925	4.14552	3.0189	0.00633385	0.0578647	-1.9875	2.72998	0.0315656
AC090772.3	-0.288781	0.584207	-3.1666	0.00633523	0.0578647	-1.41035	-2.72991	0.0315656
AKAIN1	0.725346	-0.144308	2.87229	0.00633835	0.0578647	-2.15954	2.72974	0.0315656
N4BP1	-0.100518	5.70158	-2.83477	0.0063524	0.0579478	-2.5258	-2.72901	0.0316109
UBALD2	-0.197313	3.25731	-2.78138	0.00635514	0.0579478	-2.40956	-2.72887	0.0316109
AC092115.3	0.2408	4.28595	2.99515	0.0063571	0.0579478	-2.10877	2.72877	0.0316109
AC015961.2	-0.194193	0.667903	-2.77963	0.00637654	0.058028	-2.51648	-2.72776	0.0316547
ZNF320	0.179682	2.92969	2.91264	0.00637814	0.058028	-2.12761	2.72768	0.0316547
MORF4L2	0.138393	6.22402	2.79578	0.00638002	0.058028	-2.62222	2.72758	0.0316547
CTPS2	0.154765	4.97128	2.81045	0.00638085	0.058028	-2.51294	2.72754	0.0316547
LRRC4	0.50032	3.50736	2.78198	0.00638202	0.058028	-2.44806	2.72748	0.0316547
MYOM1	-0.254838	3.70709	-3.07028	0.0063881	0.0580476	-1.89545	-2.72717	0.0316654
DONSON	-0.0939583	4.1498	-2.77886	0.00639062	0.0580476	-2.95122	-2.72704	0.0316654
RPL7L1	-0.172261	4.54817	-2.83961	0.00639623	0.0580693	-2.43669	-2.72675	0.0316772
TTBK1	0.390585	0.824384	3.1176	0.00640413	0.0581117	-1.54063	2.72634	0.0317003
FBXO46	-0.146536	3.68965	-2.98148	0.00640945	0.0581228	-2.11086	-2.72606	0.0317064
RAP2B	0.355428	0.893019	2.77771	0.00641182	0.0581228	-2.46375	2.72594	0.0317064
PIGQ	0.256126	4.03674	2.85799	0.00642128	0.0581793	-2.34532	2.72546	0.0317372
RFX1	0.126293	5.3691	2.80155	0.0064419	0.0583368	-2.55793	2.7244	0.0318231
AC072022.2	0.531276	0.0924335	2.78848	0.00644996	0.0583804	-2.39142	2.72398	0.0318469
NMD3	-0.120449	5.18376	-3.05267	0.00646527	0.0584896	-2.11667	-2.7232	0.0319065
LRP3	0.213051	2.419	2.94987	0.00646893	0.0584933	-2.01763	2.72301	0.0319085
SLC38A8	-0.366127	-0.460747	-2.77433	0.00647441	0.0585134	-2.4243	-2.72273	0.0319195
LINC00662	-0.131343	5.66172	-2.83934	0.00649799	0.0586472	-2.54933	-2.72153	0.0319925
HSPA14	-0.25001	2.0513	-2.78112	0.00650245	0.0586472	-2.35946	-2.72131	0.0319925
TFCP2	0.136539	7.55727	2.78406	0.00650358	0.0586472	-2.70113	2.72125	0.0319925
AC138956.1	0.325823	1.58342	2.93907	0.00650915	0.0586472	-2.03305	2.72097	0.0319925
PLD1	0.349027	0.783013	2.77232	0.00651194	0.0586472	-2.46061	2.72082	0.0319925
LINC00620	0.580709	0.24467	2.92743	0.00651306	0.0586472	-2.01234	2.72077	0.0319925
[truncated: 16,005 more rows]

## Sheet: Cone aging DEG
	logFC	AveExpr	t	P.Value	adj.P.Val	B	z.std	qval
DNAJC27-AS1	0.510676	4.54968	6.93959	5.39419e-10	5.76801e-06	12.5315	6.20719	3.66003e-06
WBP2NL	0.314651	5.9395	6.90249	6.40784e-10	5.76801e-06	12.3572	6.18006	3.66003e-06
LINC02197	-0.586885	4.88373	-6.52656	3.6117e-09	2.16738e-05	10.6896	-5.90106	1.37529e-05
AC090559.1	0.65277	1.23813	6.37702	7.12401e-09	3.20634e-05	9.40409	5.78797	2.03455e-05
NHLRC2	-0.16674	5.62168	-6.19744	1.59892e-08	5.75706e-05	9.2386	-5.6506	3.65308e-05
AP006623.1	0.420336	3.10987	5.87395	6.71109e-08	0.000201366	7.9034	5.39874	0.000127775
ATP10D	-0.421661	4.10118	-5.81228	8.79085e-08	0.000226088	7.6677	-5.35009	0.000143462
BMP2K	-0.264676	5.52525	-5.75086	1.14899e-07	0.000238434	7.33616	-5.30143	0.000151295
AL357153.1	2.36761	3.1742	5.74241	1.19197e-07	0.000238434	7.25741	5.29472	0.000151295
DUBR	-0.34902	3.83824	-5.69551	1.46097e-07	0.000239994	7.18729	-5.25741	0.000152285
FRMD3	-0.473779	6.17641	-5.81852	1.56495e-07	0.000239994	7.5415	-5.24475	0.000152285
PIWIL2	-1.24058	2.61667	-5.68218	1.59969e-07	0.000239994	5.96673	-5.2407	0.000152285
AL354696.2	0.33126	3.77537	5.61866	2.03605e-07	0.000281961	6.89458	5.19602	0.000178916
AC025442.2	-0.494016	1.66154	-5.55085	2.72441e-07	0.000350339	6.57053	-5.14158	0.000222304
AL162231.2	0.520253	1.22276	5.48253	3.64778e-07	0.000437806	6.11141	5.08648	0.000277805
ARMC4	-0.817402	-0.0647518	-5.45831	4.0438e-07	0.000455003	5.88519	-5.06688	0.000288717
SEPTIN12	-0.485375	1.68602	-5.38881	5.42901e-07	0.000539129	5.92712	-5.0105	0.000342098
2023-03-01	-0.573418	0.977698	-5.38711	5.46817e-07	0.000539129	5.82772	-5.00911	0.000342098
VRK2	-0.46745	3.73725	-5.3777	5.68985e-07	0.000539129	5.89523	-5.00146	0.000342098
FUT8	-0.352511	4.53923	-5.3534	6.30408e-07	0.000567462	5.77047	-4.98166	0.000360077
NRIP1	-0.15382	7.28722	-5.32503	7.10353e-07	0.000608975	5.48097	-4.95851	0.000386418
MSMO1	0.553394	4.63084	5.26148	9.27133e-07	0.00075869	5.44713	4.90651	0.000481419
UACA	-0.410511	4.15147	-5.23965	1.0156e-06	0.000794672	5.32689	-4.88859	0.00050425
AC005041.4	0.434128	1.7072	5.22953	1.05939e-06	0.000794672	5.21836	4.88027	0.00050425
TSPOAP1-AS1	0.332247	3.38053	5.20255	1.18528e-06	0.000853542	5.24533	4.85808	0.000541606
PRKD1	-0.534572	5.31257	-5.17957	1.30391e-06	0.000893983	5.0039	-4.83916	0.000567267
CNPY4	0.310658	3.14852	5.17285	1.34075e-06	0.000893983	5.12768	4.83362	0.000567267
LNCOC1	0.426237	1.84026	5.14088	1.53046e-06	0.000984032	4.91897	4.80722	0.000624407
RCHY1	-0.233203	4.80138	-5.05682	2.16308e-06	0.00131216	4.57832	-4.73756	0.000832619
VAMP8	0.531118	2.69537	5.05419	2.18658e-06	0.00131216	4.6414	4.73537	0.000832619
FNBP1L	-0.19064	4.8209	-4.97533	3.01691e-06	0.0017258	4.25891	-4.66967	0.00109509
COX15	0.268696	4.90687	5.79691	3.06758e-06	0.0017258	7.48179	4.66624	0.00109509
LINC01355	0.327484	3.65453	4.93399	3.56768e-06	0.00194633	4.21154	4.6351	0.00123502
GLS	-0.162585	8.23155	-4.90166	4.06575e-06	0.00214232	3.75062	-4.60799	0.00135938
LINC01555	0.592439	2.33834	4.89568	4.16492e-06	0.00214232	4.05219	4.60298	0.00135938
PEX5L-AS1	0.649851	5.2806	4.87992	4.6419e-06	0.00232134	3.91807	4.58035	0.00147298
AC119868.2	-0.970725	-1.01246	-4.85403	4.92473e-06	0.00234852	3.52162	-4.56797	0.00149023
CYP39A1	-0.30282	3.53005	-4.8524	4.95717e-06	0.00234852	3.8741	-4.56659	0.00149023
ARHGAP42	-0.262067	7.48609	-4.83889	5.23307e-06	0.00241567	3.54117	-4.55522	0.00153283
LRRC1	-0.338659	4.43534	-4.82701	5.488e-06	0.00247001	3.71329	-4.54521	0.00156732
TTC33	-0.125865	5.49176	-4.81913	5.66395e-06	0.00248703	3.61405	-4.53856	0.00157812
AL078587.2	-0.56725	0.485372	-4.79456	6.24785e-06	0.00267534	3.58979	-4.51782	0.00169761
AC105206.2	0.519591	1.99376	4.78424	6.51018e-06	0.00267534	3.61242	4.5091	0.00169761
MEGF11	0.419134	6.85343	4.77785	6.67802e-06	0.00267534	3.40065	4.5037	0.00169761
CYTH3	-0.333411	4.20328	-4.77425	6.77439e-06	0.00267534	3.54146	-4.50066	0.00169761
DSCAML1	-0.456211	7.64787	-4.77198	6.83584e-06	0.00267534	3.25824	-4.49874	0.00169761
AC053527.2	0.472105	5.40301	6.34967	7.43361e-06	0.00284739	9.91665	4.48088	0.00180678
PDE4DIP	-0.183037	6.2205	-4.73141	8.03001e-06	0.00298907	3.2149	-4.46438	0.00189668
SPDYE1	0.523644	4.41185	4.95251	8.13557e-06	0.00298907	4.1402	4.46159	0.00189668
MYO3B-AS1	0.587565	6.30895	4.73895	8.34723e-06	0.0030055	3.43962	4.45608	0.00190711
GTF2IRD2	0.437496	5.12744	5.05798	8.51672e-06	0.0030064	4.59492	4.45177	0.00190768
DDX60L	-0.256969	5.76279	-4.69406	9.30708e-06	0.00322222	3.09794	-4.43268	0.00204462
AC010997.3	-0.712141	-0.0856957	-4.66527	1.04241e-05	0.00354086	3.03534	-4.40818	0.00224681
AL138831.1	0.789389	2.79625	5.18888	1.18007e-05	0.00393421	4.97303	4.38124	0.00249641
LINC02405	0.987008	1.86611	4.62513	1.22012e-05	0.00397581	3.05383	4.37396	0.00252281
AL158077.2	-0.556527	7.87175	-4.77648	1.27625e-05	0.00397581	3.55301	-4.36414	0.00252281
ZNF195	-0.255296	4.15476	-4.60797	1.30472e-05	0.00397581	2.91312	-4.35931	0.00252281
GLOD5	0.627818	3.34638	5.13214	1.30935e-05	0.00397581	4.75029	4.35854	0.00252281
AC063980.1	0.536684	5.36223	4.60464	1.32181e-05	0.00397581	2.89101	4.35646	0.00252281
LZTS1	-0.311828	3.18018	-4.60401	1.32505e-05	0.00397581	2.97492	-4.35593	0.00252281
FAM120AOS	-0.331776	5.4269	-4.59043	1.40449e-05	0.00414508	2.89672	-4.34316	0.00263022
ESYT1	0.461303	3.39827	4.56602	1.53626e-05	0.00445433	2.87195	4.32342	0.00282644
ABHD17B	-0.187867	5.22007	-4.56228	1.55875e-05	0.00445433	2.66927	-4.32022	0.00282644
SEL1L3	-0.567783	2.55511	-4.55607	1.59677e-05	0.00449165	2.82721	-4.3149	0.00285013
AC112196.1	0.449716	4.99127	5.17588	1.63676e-05	0.00452755	5.08324	4.30943	0.00287291
DDX60	-0.29395	3.62361	-4.54496	1.66702e-05	0.00452755	2.72166	-4.30538	0.00287291
MDC1-AS1	0.318103	3.22207	4.5422	1.68497e-05	0.00452755	2.78756	4.303	0.00287291
CUZD1	-0.463811	0.382682	-4.53531	1.73053e-05	0.00458158	2.67999	-4.29709	0.00290719
DCDC2B	0.340412	3.66197	4.50602	1.93777e-05	0.0050559	2.64277	4.27194	0.00320817
R3HCC1	-0.40699	4.66659	-4.50466	2.08991e-05	0.00537496	2.57698	-4.25506	0.00341062
AC135893.1	0.65482	1.22264	4.48509	2.26871e-05	0.00575263	1.59836	4.23666	0.00365027
AL031587.2	0.62027	3.24349	4.53251	2.33572e-05	0.00584028	2.50643	4.23011	0.00370588
PURB	-0.468128	4.82656	-4.49988	2.38696e-05	0.00588662	2.57839	-4.22523	0.00373529
INTS7	-0.275298	4.3736	-4.44698	2.43115e-05	0.0059146	2.31925	-4.2211	0.00375305
AC074032.1	0.183637	6.48218	4.4362	2.53343e-05	0.00608124	2.14219	4.2118	0.00385878
AC023906.4	0.497511	5.81739	4.76943	2.85569e-05	0.00676461	3.55771	4.18468	0.00429241
ZNF460-AS1	0.310524	3.30744	4.39071	3.01299e-05	0.00704453	2.24304	4.17248	0.00447003
AL442128.2	0.478227	0.398605	4.38159	3.11921e-05	0.00719938	2.06851	4.16458	0.00456829
SPOPL	-0.156462	5.15236	-4.37515	3.19635e-05	0.00722792	1.99774	-4.15901	0.0045864
LNPEP	-0.214032	6.6463	-4.37387	3.21188e-05	0.00722792	1.86487	-4.1579	0.0045864
SNX16	-0.329815	2.91938	-5.74485	3.27361e-05	0.00724854	7.30547	-4.15355	0.00459948
CCDC126	-0.16708	4.7843	-4.36611	3.30767e-05	0.00724854	1.99921	-4.15118	0.00459948
LINC01828	-1.19358	0.19833	-4.37531	3.45658e-05	0.00724854	0.744321	-4.14109	0.00459948
2023-03-02	-0.505272	2.31139	-4.35403	3.46246e-05	0.00724854	2.12623	-4.1407	0.00459948
AL356481.1	0.223655	3.61063	4.34778	3.54517e-05	0.00724854	2.0726	4.13528	0.00459948
ARRDC4	-0.405613	1.56499	-4.34692	3.55672e-05	0.00724854	2.11808	-4.13454	0.00459948
AC068025.1	0.368896	3.34818	4.34622	3.5661e-05	0.00724854	2.09183	4.13393	0.00459948
ETNK1	-0.151783	7.01861	-4.34507	3.58167e-05	0.00724854	1.74095	-4.13293	0.00459948
AC105339.3	0.44712	4.75029	4.79189	3.5834e-05	0.00724854	3.64444	4.13282	0.00459948
FAM184A	-0.227733	5.9075	-6.15731	3.67295e-05	0.00734712	9.04655	-4.12714	0.00466204
MRNIP	0.136257	5.41145	4.32664	3.83949e-05	0.00745195	1.83136	4.11693	0.00472856
FRMD5	-0.604805	4.76912	-4.32503	3.86288e-05	0.00745195	1.82952	-4.11553	0.00472856
TNK2-AS1	-0.335256	2.5392	-4.32324	3.88899e-05	0.00745195	2.01745	-4.11398	0.00472856
AC010201.3	0.171937	5.53519	4.32311	3.89093e-05	0.00745195	1.80711	4.11386	0.00472856
AC007262.2	-0.381839	4.39534	-4.3126	4.04786e-05	0.0076709	1.82104	-4.10473	0.00486749
LINC02656	1.34251	1.46344	4.29112	4.38795e-05	0.00822878	1.86578	4.08604	0.00522148
Z69666.1	0.654402	1.0995	4.39496	4.45752e-05	0.00827307	1.48234	4.08239	0.00524959
SSBP4	0.251986	4.53989	4.2678	4.78824e-05	0.00879619	1.70641	4.06573	0.00558153
GABRG2	-0.287124	4.31393	-4.2375	5.36127e-05	0.00969957	1.58366	-4.03929	0.00615476
AC015983.2	0.39462	3.66156	4.23488	5.41369e-05	0.00969957	1.67858	4.03701	0.00615476
AC009120.4	0.57811	2.76849	5.21578	5.44163e-05	0.00969957	5.17144	4.0358	0.00615476
SLC2A12	-0.549736	0.495813	-4.22943	5.52472e-05	0.00971439	1.67269	-4.03224	0.00616416
COLEC12	1.02345	4.55485	4.27473	5.55786e-05	0.00971439	1.82849	4.03084	0.00616416
STK32C	0.461002	3.42204	4.63471	5.91745e-05	0.0100948	3.03656	4.01608	0.00640557
TNS2	0.652205	0.652746	4.20853	5.97049e-05	0.0100948	1.51009	4.01397	0.00640557
AL121900.1	0.525341	1.74375	4.20887	6.01952e-05	0.0100948	1.06851	4.01204	0.00640557
SLC36A4	-0.13234	5.87835	-4.20505	6.04788e-05	0.0100948	1.32586	-4.01093	0.00640557
ZNF75D	-0.34573	4.01736	-4.58095	6.05589e-05	0.0100948	2.86477	-4.01062	0.00640557
FLG	-0.579371	0.114268	-4.19269	6.33115e-05	0.0103058	1.55776	-4.00012	0.00653943
LRP12	-0.19669	4.63868	-4.19182	6.35152e-05	0.0103058	1.39751	-3.99936	0.00653943
AP5M1	-0.146282	5.74595	-4.19171	6.35418e-05	0.0103058	1.29495	-3.99926	0.00653943
CPEB2	-0.273676	5.74656	-5.0195	6.67462e-05	0.0107196	4.42814	-3.9876	0.006802
REEP4	0.581121	1.67963	4.17622	6.7284e-05	0.0107196	1.53337	3.98569	0.006802
ITCH-AS1	0.773598	1.55309	4.41246	6.82701e-05	0.0107813	1.79812	3.98224	0.00684115
C21orf58	0.347711	3.93051	4.24687	6.93863e-05	0.0108002	1.69686	3.97838	0.00685316
AC092720.2	0.567094	0.726366	4.16391	7.0409e-05	0.0108002	1.42601	3.9749	0.00685316
AC046130.2	-0.752577	-0.25053	-4.29191	7.04333e-05	0.0108002	0.529537	-3.97482	0.00685316
AC005899.8	0.470117	4.7093	4.16235	7.08128e-05	0.0108002	1.35906	3.97354	0.00685316
HESX1	0.356473	2.0814	4.16015	7.13895e-05	0.0108002	1.48821	3.97161	0.00685316
POU2AF1	2.40567	3.22692	4.84578	7.26025e-05	0.0108922	3.84339	3.96759	0.00691152
CCDC169	-0.40175	2.12612	-4.14004	7.68682e-05	0.011369	1.40935	-3.95396	0.0072141
SILC1	0.662784	0.318034	4.13597	7.80267e-05	0.011369	1.2649	3.95038	0.0072141
AC078881.1	0.415536	3.60212	4.77174	7.83905e-05	0.011369	3.54937	3.94927	0.0072141
ANKRD42	-0.130021	5.72974	-4.13282	7.89334e-05	0.011369	1.09117	-3.94762	0.0072141
AL157938.3	0.473548	3.84023	4.56048	7.89546e-05	0.011369	2.7893	3.94755	0.0072141
PAQR9	-0.485453	3.10042	-4.15221	7.99724e-05	0.011369	1.27521	-3.94448	0.0072141
AC025031.1	0.602695	1.7253	4.6014	8.16909e-05	0.011369	2.73644	3.93938	0.0072141
TEX9	-0.239277	6.81357	-4.322	8.17912e-05	0.011369	1.94525	-3.93909	0.0072141
ZBTB41	-0.217439	3.91119	-4.12015	8.26847e-05	0.011369	1.19826	-3.93648	0.0072141
INSIG1	0.477408	2.94689	4.12012	8.26919e-05	0.011369	1.34418	3.93646	0.0072141
AC009690.2	0.306914	7.96195	4.67507	8.27276e-05	0.011369	3.13059	3.93636	0.0072141
AC007666.2	0.287931	5.9538	4.60335	8.51343e-05	0.0114848	2.93524	3.92947	0.00728757
AC009955.4	-1.01993	-0.212877	-4.24579	8.52478e-05	0.0114848	0.404618	-3.92915	0.00728757
PRSS51	-0.495164	3.5166	-4.11105	8.54839e-05	0.0114848	1.18565	-3.92848	0.00728757
HECTD2	-0.216579	5.49029	-4.09989	8.90408e-05	0.0118741	0.979192	-3.91866	0.00753457
HPD	0.518077	0.989398	4.94413	9.1829e-05	0.0121559	3.95091	3.91123	0.00771337
NUFIP2	-0.147212	6.39584	-4.08332	9.45862e-05	0.0124295	0.861014	-3.90408	0.00788698
CLN8	-0.348813	4.00328	-4.09633	9.5972e-05	0.0124455	1.20362	-3.90056	0.00789714
LINC01876	-0.435367	4.36064	-4.07202	9.85554e-05	0.0124455	0.999225	-3.89412	0.00789714
CFAP206	-0.247244	3.75753	-4.07164	9.86923e-05	0.0124455	1.05703	-3.89378	0.00789714
NDFIP2	-0.236572	3.90003	-4.07163	9.86959e-05	0.0124455	1.05356	-3.89378	0.00789714
MIR155HG	0.609995	2.73662	4.21949	9.88169e-05	0.0124455	1.47481	3.89348	0.00789714
APH1A	0.332398	2.50748	4.07034	9.91583e-05	0.0124455	1.19112	3.89264	0.00789714
MMAB	0.151963	4.94867	4.06926	9.95471e-05	0.0124455	0.975745	3.89169	0.00789714
LIAS	0.142274	4.64238	4.06544	0.000100941	0.0125247	0.999846	3.88832	0.00794739
COG6	-0.147914	5.99017	-4.06256	0.000102001	0.0125247	0.826629	-3.88578	0.00794739
NSUN6	0.212823	5.45733	4.28347	0.00010339	0.0125247	1.85579	3.8825	0.00794739
PDZD7	0.458229	2.5742	4.05819	0.000103631	0.0125247	1.15362	3.88193	0.00794739
FAM241A	-0.407832	3.91865	-5.05632	0.000103726	0.0125247	4.64476	-3.88171	0.00794739
ECI2	-0.317896	4.1324	-4.22049	0.00010438	0.0125247	1.63577	-3.88018	0.00794739
SEMA3C	2.10631	2.33304	4.26773	0.000105566	0.0125247	1.58875	3.87743	0.00794739
AC005480.1	0.252431	5.64448	4.11643	0.000105746	0.0125247	1.30626	3.87701	0.00794739
DNAH17-AS1	0.571103	1.77781	4.04058	0.00011046	0.0129472	1.10002	3.86639	0.0082155
AL022068.1	-0.56685	4.3713	-4.03985	0.000110752	0.0129472	0.880043	-3.86574	0.0082155
MIR210HG	0.885921	4.81079	4.03751	0.000111691	0.0129727	0.93823	3.86368	0.00823166
SLC9B1	0.389631	4.67274	4.8348	0.000112411	0.0129727	3.80526	3.86211	0.00823166
AP003071.2	0.74651	1.5084	4.03013	0.000114711	0.0131421	1.05034	3.85716	0.00833917
LINC02694	-0.449394	1.41417	-4.02862	0.000115339	0.0131421	1.06207	-3.85583	0.00833917
PEX11G	0.360957	2.1096	4.02282	0.00011778	0.0133358	1.04486	3.8507	0.00846211
AC144652.1	0.708366	0.95141	4.01692	0.000120313	0.0135375	0.960821	3.84549	0.00859005
RCAN3	0.163001	6.17897	4.01489	0.000121199	0.0135443	0.688246	3.84369	0.00859436
BBX	-0.180011	7.13697	-4.01044	0.000123155	0.0135443	0.555696	-3.83976	0.00859436
AL110292.1	-1.00076	-0.497274	-6.15218	0.0001235	0.0135443	8.274	-3.83907	0.00859436
AC093297.2	-0.560058	2.6442	-4.04578	0.00012397	0.0135443	0.888726	-3.83814	0.00859436
SEC61A2	0.282029	4.30156	4.05285	0.000124135	0.0135443	1.09497	3.83781	0.00859436
ANKRD37	0.657719	6.05468	4.00405	0.000126025	0.0136676	0.698665	3.8341	0.00867266
RELL2	0.566201	4.31535	4.06972	0.00013029	0.0139443	1.151	3.82591	0.00884819
LINC01151	2.70966	1.30989	4.50959	0.000130499	0.0139443	2.4126	3.82552	0.00884819
ELF1	-0.217611	4.67761	-3.99349	0.0001309	0.0139443	0.715005	-3.82476	0.00884819
SPAG4	0.934485	0.880394	4.54022	0.000136104	0.0143863	2.55956	3.81514	0.00912866
E2F5	-0.263437	3.77986	-3.98152	0.000136647	0.0143863	0.74499	-3.81416	0.00912866
AC138627.1	0.521274	5.54963	4.84017	0.000141659	0.0147571	3.75259	3.80525	0.00936395
FRMD4A	-0.523056	8.05242	-3.97082	0.000141989	0.0147571	0.345553	-3.80468	0.00936395
ABCD2	-0.459446	3.67187	-5.10496	0.000142628	0.0147571	4.82939	-3.80357	0.00936395
NOXRED1	0.179281	5.77494	3.96755	0.000143662	0.0147791	0.553524	3.80178	0.00937794
AC090115.1	0.334899	2.70638	3.95599	0.000149724	0.0153153	0.802556	3.79153	0.00971814
RRM1	0.160751	3.89291	3.95211	0.000151811	0.0153611	0.707645	3.78809	0.0097472
SUSD4	-0.346549	4.7668	-5.47777	0.000151879	0.0153611	6.26254	-3.78798	0.0097472
AC009107.2	0.398912	3.5357	4.29955	0.000154954	0.015508	1.90736	3.78299	0.00984045
LRRN2	-0.562596	1.75377	-3.94619	0.000155054	0.015508	0.785497	-3.78283	0.00984045
SPDYE21P	0.264331	4.71918	3.94114	0.000157872	0.0157026	0.612701	3.77835	0.00996394
AP003419.3	-0.439145	-0.252777	-3.93829	0.000159484	0.0157758	0.687522	-3.77582	0.0100103
C5orf34	0.478266	0.92188	3.93321	0.000162392	0.0159756	0.717953	3.77131	0.0101372
BFAR	-0.250228	4.39758	-3.9441	0.000164793	0.0160911	0.755317	-3.76765	0.0102104
RIDA	-0.406206	3.71028	-4.00162	0.000165353	0.0160911	0.909802	-3.7668	0.0102104
DENND1B	-0.188676	6.25177	-3.92234	0.000168794	0.0163376	0.329746	-3.76165	0.0103669
TBC1D8	-0.160306	5.88592	-3.91649	0.000172339	0.0165916	0.345647	-3.75645	0.010528
MFSD6	-0.28334	4.44316	-3.91059	0.000175983	0.0167904	0.44597	-3.75121	0.0106542
ACSBG2	0.434462	0.990778	3.91013	0.00017627	0.0167904	0.647035	3.7508	0.0106542
AL356379.2	0.556041	0.336564	3.90607	0.000178825	0.0169441	0.580539	3.74719	0.0107517
EPB41	0.247987	9.47659	3.98179	0.000182697	0.0172204	0.737726	3.74181	0.010927
GABPB2	0.352287	4.38621	3.98074	0.000183665	0.0172215	0.877321	3.74049	0.0109277
FRG1-DT	-0.394201	4.60776	-4.87514	0.000186999	0.0173416	3.90975	-3.73596	0.0110039
AC007541.1	-0.534699	2.93529	-3.90601	0.000188532	0.0173416	0.505633	-3.73391	0.0110039
PPP6R2	0.225512	6.68483	3.93461	0.000188583	0.0173416	0.687156	3.73384	0.0110039
AC013267.2	0.712682	1.28303	4.62445	0.000189429	0.0173416	2.89437	3.73271	0.0110039
ZNF24	-0.357425	5.32519	-3.94849	0.000189763	0.0173416	0.771545	-3.73227	0.0110039
PAPSS1	-0.131306	5.39098	-3.88763	0.000190886	0.0173561	0.299269	-3.73078	0.0110132
BEND3	-0.420317	0.673406	-3.88339	0.000193767	0.0174795	0.596926	-3.72701	0.0110914
C19orf57	0.514224	2.46775	4.08179	0.000195073	0.0174795	1.04052	3.72531	0.0110914
RBM6	0.205518	8.06673	3.93318	0.000196103	0.0174795	0.631162	3.72398	0.0110914
ADAMTS9	-0.906808	1.62058	-3.9214	0.000196568	0.0174795	0.38516	-3.72339	0.0110914
LINC00863	-0.28147	2.89782	-3.87857	0.000197097	0.0174795	0.494221	-3.72271	0.0110914
GLCE	-0.161021	6.38246	-3.86665	0.000205553	0.0181109	0.134058	-3.71209	0.0114921
C15orf41	-0.188399	7.40354	-3.86514	0.000206648	0.0181109	0.0548979	-3.71075	0.0114921
ZSCAN18	0.258341	5.78499	4.69578	0.000207234	0.0181109	3.25498	3.71003	0.0114921
AMER2	-0.439943	5.21563	-3.86823	0.000211116	0.0182713	0.526615	-3.70533	0.0115939
SCIMP	0.357043	3.49754	4.07666	0.000211308	0.0182713	1.16343	3.7051	0.0115939
AC136604.2	0.344117	3.7909	4.78044	0.000212115	0.0182713	3.62323	3.70413	0.0115939
MRPS30	-0.370812	4.16759	-3.86313	0.000214291	0.0183709	0.496091	-3.70154	0.0116571
POLR2F	0.185266	4.59644	3.85236	0.000216149	0.0183725	0.307999	3.69935	0.0116581
TMEM38B	-0.172701	5.09213	-3.8521	0.000216351	0.0183725	0.192252	-3.69912	0.0116581
NETO1	-0.918969	0.714057	-3.85034	0.000217695	0.0183998	0.501206	-3.69754	0.0116754
AL049828.1	-0.360408	7.33715	-4.21869	0.000224313	0.0188706	1.55692	-3.68993	0.0119741
C3orf67-AS1	0.341953	3.77886	3.83931	0.000226289	0.0188855	0.348303	3.6877	0.0119836
MMP24	0.430301	5.28868	4.28161	0.000226588	0.0188855	1.83326	3.68736	0.0119836
ZNF582	-0.222428	2.59621	-3.82891	0.000234687	0.0193887	0.379357	-3.67842	0.0123029
OXCT1	-0.451924	5.01315	-5.1323	0.000234779	0.0193887	4.87165	-3.67832	0.0123029
WASL	-0.147705	6.02833	-4.77992	0.000238298	0.0195894	3.44019	-3.67452	0.0124303
MOCS1	-0.299365	3.63441	-3.99198	0.000240343	0.0196677	0.906722	-3.67234	0.0124799
DNAJC9-AS1	0.415254	2.06525	4.27093	0.000242032	0.0197163	1.7844	3.67055	0.0125108
LINC02224	-0.756893	2.13322	-3.939	0.000244641	0.019839	0.534409	-3.66781	0.0125886
TRMT61A	0.433409	1.93847	3.81227	0.000248739	0.020081	0.384006	3.66355	0.0127422
ZDHHC15	-0.236432	3.74929	-3.81032	0.000250439	0.0201279	0.211062	-3.66181	0.0127719
ZBTB10	-0.196666	3.19769	-3.80587	0.000254361	0.0203522	0.241329	-3.65783	0.0129143
SERHL2	0.264956	2.54762	3.80239	0.000257466	0.0204493	0.333473	3.65472	0.0129759
DBF4B	0.285646	4.65442	3.93528	0.000257846	0.0204493	0.737507	3.65434	0.0129759
AC122129.1	0.433735	1.54787	4.28491	0.000260278	0.0205517	1.74565	3.65193	0.0130409
XAB2	0.255249	2.74107	3.79445	0.000264691	0.0208089	0.290117	3.64761	0.0132041
ABHD3	-0.320841	3.96455	-3.78743	0.000271233	0.0211375	0.129497	-3.64133	0.0134125
PLET1	0.350349	4.05904	3.78591	0.000272673	0.0211375	0.186143	3.63997	0.0134125
AP000350.6	1.69506	-0.333362	3.89464	0.000274529	0.0211375	-0.507672	3.63822	0.0134125
AL121935.1	0.44593	2.07779	3.78367	0.0002748	0.0211375	0.294899	3.63797	0.0134125
AC092903.2	0.469218	3.23777	4.54013	0.000275522	0.0211375	2.75157	3.63729	0.0134125
LINC01422	-0.850086	1.78427	-3.83604	0.000275915	0.0211375	0.121964	-3.63692	0.0134125
EXD2	-0.148017	4.20419	-3.7806	0.000277748	0.0211877	0.0588834	-3.63522	0.0134444
ZNF837	0.294453	1.91335	3.77027	0.00028788	0.0217779	0.253388	3.62597	0.0138189
SLC8A1	-0.758855	3.06044	-3.77025	0.000287904	0.0217779	0.113708	-3.62595	0.0138189
ACBD4	0.19094	4.46758	3.759	0.000299342	0.0222291	-0.00509211	3.61587	0.0141053
AC018616.1	0.37631	6.736	3.81996	0.000299718	0.0222291	0.316907	3.61554	0.0141053
DUOX1	0.533157	4.01401	4.36229	0.00030033	0.0222291	2.14068	3.61501	0.0141053
EPRS	-0.132982	5.4264	-3.7567	0.000301737	0.0222291	-0.140378	-3.6138	0.0141053
AC106897.1	0.384126	2.96336	3.75528	0.000303226	0.0222291	0.151163	3.61253	0.0141053
CC2D2B	0.416295	4.88659	3.78669	0.000304741	0.0222291	0.277104	3.61124	0.0141053
AC092123.1	0.311915	1.10711	3.75376	0.000304823	0.0222291	0.200143	3.61117	0.0141053
ZNF7	0.178118	4.25425	3.75236	0.000306296	0.0222291	0.0138031	3.60992	0.0141053
SIRT6	0.229001	3.03957	3.75202	0.00030666	0.0222291	0.133094	3.60961	0.0141053
H2AFV	-0.238915	6.50818	-3.78249	0.000307052	0.0222291	0.214186	-3.60928	0.0141053
PNCK	0.479811	6.1357	4.24232	0.00030849	0.0222291	1.62927	3.60806	0.0141053
AC013652.1	-0.547532	3.91698	-4.36261	0.000309441	0.0222291	2.13459	-3.60727	0.0141053
ZBTB44	-0.111361	6.29678	-3.74854	0.000310371	0.0222291	-0.241364	-3.60649	0.0141053
GPR135	-0.413881	3.03217	-5.13634	0.000312026	0.0222291	4.97846	-3.60511	0.0141053
AC108449.1	0.470493	5.74831	3.81154	0.000313583	0.0222291	0.326516	3.60381	0.0141053
ZFY	-0.318027	1.76804	-3.74552	0.000313626	0.0222291	0.0282899	-3.60378	0.0141053
BRCA1	0.243968	5.14401	3.96619	0.000315797	0.0222953	0.8147	3.60198	0.0141472
AC104984.3	0.406115	3.12787	4.04758	0.000319981	0.0223756	1.08892	3.59856	0.0141982
AP005131.1	0.604749	5.4809	3.75102	0.00032092	0.0223756	0.157377	3.5978	0.0141982
APOA1-AS	0.347504	4.50486	4.17032	0.000321592	0.0223756	1.47476	3.59726	0.0141982
FSD1L	-0.23598	10.1412	-3.82028	0.000321906	0.0223756	0.179016	-3.597	0.0141982
TDRP	-0.180287	5.51931	-5.01033	0.000326151	0.0225834	4.39454	-3.59359	0.0143301
ABCD3	-0.122617	5.72515	-3.72742	0.000333826	0.0230263	-0.258842	-3.58753	0.0146111
AC068025.2	0.420602	3.98151	3.91177	0.000337702	0.0231143	0.666534	3.58452	0.0146669
DDIT4L	1.61831	0.0179676	3.91843	0.000339838	0.0231143	0.082334	3.58287	0.0146669
PTPRM	-0.906914	5.30381	-4.33131	0.000339907	0.0231143	1.93925	-3.58282	0.0146669
ABCC5	0.233793	8.94029	3.74228	0.000340237	0.0231143	0.00558768	3.58256	0.0146669
LRRN3	0.488269	3.01349	3.74309	0.000348055	0.0235565	0.0737128	3.57663	0.0149475
FAM151B	-0.154143	4.28928	-3.7084	0.000356372	0.0240174	-0.179943	-3.57045	0.01524
EXTL3	-0.159899	3.64413	-3.70681	0.000358327	0.0240174	-0.103844	-3.56901	0.01524
FDPS	0.276902	5.47294	4.37518	0.000359531	0.0240174	2.1078	3.56814	0.01524
LINC01277	0.498299	1.37475	3.70432	0.000361403	0.0240174	0.0522201	3.56677	0.01524
LHFPL5	0.407089	3.46848	3.82912	0.000363795	0.0240174	0.385071	3.56504	0.01524
VPS35L	0.216822	6.22409	3.7391	0.000364558	0.0240174	0.0912976	3.56449	0.01524
SMAP1	-0.135376	6.9328	-4.51915	0.000366412	0.0240174	2.38734	-3.56316	0.01524
CAPRIN1	-0.124718	5.77605	-3.6995	0.000367417	0.0240174	-0.353675	-3.56244	0.01524
GIPC2	-0.35555	4.48941	-3.72604	0.000367463	0.0240174	0.0974621	-3.56241	0.01524
AP001267.3	0.318982	3.7199	3.97628	0.000368586	0.0240174	0.871673	3.56161	0.01524
MTHFD1	0.24929	4.46501	3.69782	0.000369539	0.0240174	-0.17933	3.56093	0.01524
ARRDC3	0.339695	5.03267	3.6956	0.000372354	0.0241132	-0.249274	3.55894	0.0153008
IGIP	-0.500391	2.95642	-3.82374	0.000374254	0.0241203	0.338431	-3.5576	0.0153053
IL13RA1	-0.175058	4.39948	-3.69343	0.000375142	0.0241203	-0.238078	-3.55698	0.0153053
AC243830.2	-0.444247	-0.0959217	-3.6915	0.00037762	0.0241932	-0.0167225	-3.55525	0.0153515
AP004147.1	0.567526	5.78578	4.14049	0.000381531	0.0242843	1.31604	3.55254	0.0154094
ADIPOR1	-0.274158	5.07585	-3.69458	0.000382944	0.0242843	-0.000182582	-3.55157	0.0154094
ALOX12-AS1	0.259266	5.39206	3.87633	0.000384412	0.0242843	0.522555	3.55056	0.0154094
RYK	-0.148296	6.3203	-4.22731	0.00038479	0.0242843	1.51884	-3.5503	0.0154094
AMN1	0.180736	7.24229	4.61793	0.000385787	0.0242843	2.80573	3.54962	0.0154094
SUCO	-0.189654	6.79106	-4.06767	0.000387713	0.0243206	1.00204	-3.54831	0.0154323
KLHL13	0.694592	3.41212	4.16408	0.000390376	0.0244025	1.4767	3.54651	0.0154844
LINC02298	0.372756	1.07965	3.68005	0.0003927	0.0244629	-0.0237786	3.54494	0.0155227
RB1	-0.151585	6.49841	-4.59603	0.000395613	0.0245594	2.78177	-3.54299	0.0155839
RMND5A	-0.253397	4.31904	-4.48985	0.000410706	0.0254087	2.52881	-3.53311	0.0161228
AC007277.1	0.359097	5.85951	3.88896	0.000414532	0.0255576	0.53626	3.53066	0.0162173
FBXO30	-0.31405	3.03784	-3.95421	0.000421413	0.0258932	0.777435	-3.5263	0.0164302
STARD4	0.511418	2.11373	3.65269	0.000431056	0.0263956	-0.119464	3.5203	0.016749
SHOC2	-0.157156	6.20823	-4.16207	0.000437235	0.0266832	1.32513	-3.51653	0.0169315
ZNF117	-0.383477	2.68037	-4.4066	0.000446463	0.0271543	2.30192	-3.51098	0.0172305
GPR34	0.313373	1.25998	3.64032	0.000449556	0.0272504	-0.135941	3.50914	0.0172914
MPG	0.165324	4.17779	3.63695	0.00045472	0.0274555	-0.336654	3.5061	0.0174216
ATP6V1E2	0.403593	3.02127	4.88859	0.000455991	0.0274555	4.019	3.50536	0.0174216
INO80D	-0.140436	5.6051	-3.63344	0.000460157	0.027614	-0.554508	-3.50294	0.0175222
TRIM13	0.245868	6.03848	4.00935	0.000461844	0.0276232	0.88444	3.50196	0.017528
FAM53A	-0.395681	0.0747636	-3.62985	0.00046578	0.0277664	-0.184758	-3.4997	0.0176188
DNAH10	-0.222618	3.50053	-3.62797	0.000468757	0.0278516	-0.354241	-3.498	0.0176729
FAM53B	-0.364092	4.10083	-4.12025	0.000475921	0.0281842	1.31969	-3.49396	0.017884
DECR1	-0.280726	4.11776	-3.61816	0.000484568	0.0285544	-0.444157	-3.48915	0.0181189
AC119674.1	0.939014	1.34086	3.7142	0.000485343	0.0285544	-0.292674	3.48872	0.0181189
AL512330.1	0.265258	2.96816	3.61499	0.000489784	0.0286006	-0.26646	3.48628	0.0181482
LMO7	-0.158717	4.76091	-3.61482	0.000490063	0.0286006	-0.537436	-3.48613	0.0181482
KRAS	-0.229588	7.02642	-3.82372	0.000490895	0.0286006	0.28653	-3.48568	0.0181482
AL096706.1	0.454163	0.34267	3.61058	0.000497134	0.0287766	-0.267071	3.4823	0.0182599
RARB	-0.429324	7.95446	-3.61033	0.000497538	0.0287766	-0.827628	-3.48208	0.0182599
ENTPD3-AS1	0.315775	5.31604	4.2301	0.000498711	0.0287766	1.55628	3.48145	0.0182599
AC092445.1	0.539339	-0.101624	3.60855	0.000500546	0.0287902	-0.30453	3.48046	0.0182685
FBXO22	-0.17758	7.6415	-4.43071	0.000512055	0.0293583	2.05236	-3.47437	0.018629
PDIA4	-0.285347	2.78064	-3.60001	0.000515153	0.0294422	-0.356017	-3.47275	0.0186822
EIF2B1	0.287902	4.22529	3.65941	0.00052287	0.0297887	-0.0978808	3.46876	0.0189021
OVCH2	-1.18956	5.08112	-3.62968	0.000528314	0.0300031	-0.198917	-3.46597	0.0190381
AC011625.1	0.518782	3.95277	3.64757	0.000529966	0.0300031	-0.136148	3.46513	0.0190381
LINC00607	-0.472576	2.53533	-4.58989	0.000534014	0.0301375	2.94503	-3.46309	0.0191234
RAB32	0.528622	2.51887	4.41474	0.000541567	0.0304181	2.34187	3.45931	0.0193015
CFAP61	-0.252004	4.31913	-3.5847	0.000542366	0.0304181	-0.581938	-3.45891	0.0193015
RPP14	-0.286464	3.12747	-3.87697	0.000546536	0.0304997	0.542137	-3.45685	0.0193533
Z99127.1	0.362838	3.72265	3.75249	0.00054721	0.0304997	0.178505	3.45651	0.0193533
NNT	-0.216943	5.45686	-3.86531	0.000556743	0.0308895	0.437109	-3.45186	0.0196006
BTG4	1.96156	2.23031	4.09711	0.000557957	0.0308895	1.24163	3.45127	0.0196006
ARMCX5-GPRASP2	-0.206891	5.42091	-3.92935	0.000561951	0.0308895	0.647254	-3.44934	0.0196006
AL139022.1	0.543135	4.52982	3.98529	0.000561959	0.0308895	0.877994	3.44934	0.0196006
SESN3	-0.371935	4.44174	-4.33484	0.000562781	0.0308895	2.00245	-3.44894	0.0196006
PPP2R1B	-0.245269	4.27216	-4.14644	0.000568515	0.0311094	1.40228	-3.44621	0.0197401
IGSF6	0.414764	3.04659	3.5707	0.000576673	0.0314601	-0.403607	3.44236	0.0199627
AC092939.1	0.494416	6.57044	3.57847	0.000585903	0.0318671	-0.409138	3.43806	0.0202209
ACAT2	0.374676	3.50363	3.55856	0.000592011	0.0321023	-0.509064	3.43525	0.0203702
TRMT11	-0.261058	8.37699	-3.89802	0.00059411	0.0321194	0.367854	-3.43429	0.020381
SAMD8	-0.144463	4.88439	-3.55527	0.000598554	0.0322628	-0.717187	-3.43227	0.020472
LRP1B	1.82209	2.83093	3.67942	0.000603933	0.0323985	-0.0891222	3.42984	0.0205581
AC007533.1	0.439429	4.04087	3.60666	0.000604671	0.0323985	-0.25173	3.42951	0.0205581
RPS6KA6	-0.203351	5.48448	-3.84035	0.00061624	0.0329204	0.347681	-3.42436	0.0208893
RAB4B	0.166184	4.14297	3.54271	0.000624175	0.0332107	-0.622579	3.42089	0.0210735
DRAM1	0.483862	0.843667	3.54194	0.000625786	0.0332107	-0.431024	3.42018	0.0210735
BCL2L13	0.197	6.20827	4.18897	0.000627208	0.0332107	1.40051	3.41957	0.0210735
AL023284.4	-0.488983	2.75474	-4.54562	0.000633385	0.0333979	2.75078	-3.4169	0.0211923
PPP1R32	0.422539	-0.129949	3.53766	0.000634764	0.0333979	-0.496629	3.41631	0.0211923
MMP25-AS1	0.304461	2.651	4.41716	0.000636309	0.0333979	2.34868	3.41565	0.0211923
FAM234A	0.222192	4.95379	3.67134	0.000653566	0.0342039	-0.0876574	3.40835	0.0217037
PTRH1	0.262196	5.09499	3.52594	0.000660003	0.0344407	-0.764053	3.40568	0.0218539
NAT9	0.328869	4.84391	3.68626	0.000673691	0.0350167	-0.0387755	3.40007	0.0222194
TDRD6	-0.445896	3.14873	-4.08882	0.000677615	0.0350167	1.23102	-3.39848	0.0222194
PKM	0.290262	9.15779	3.51795	0.000677743	0.0350167	-1.13027	3.39843	0.0222194
AP003717.4	-0.756842	-0.200005	-3.62491	0.000680483	0.0350167	-0.893572	-3.39732	0.0222194
MMP24OS	0.314095	5.01864	3.51615	0.000681819	0.0350167	-0.810211	3.39679	0.0222194
USP53	-0.211881	5.63915	-3.93967	0.000684514	0.0350167	0.669324	-3.39571	0.0222194
MON1B	-0.209149	4.00194	-3.51489	0.000684656	0.0350167	-0.743965	-3.39565	0.0222194
AC005522.1	0.680874	1.12407	3.61478	0.000689563	0.0351677	-0.529252	3.3937	0.0223153
AL008633.1	-0.741988	2.29334	-4.39061	0.000702297	0.0356277	2.19313	-3.38868	0.0226072
ADAM10	-0.116027	6.31912	-3.50711	0.000702541	0.0356277	-1.00896	-3.38859	0.0226072
BMERB1	0.276108	5.97412	3.5604	0.000706536	0.0357297	-0.443434	3.38703	0.0226719
DARS-AS1	0.720837	3.94403	3.49948	0.000720519	0.0362345	-0.698107	3.38165	0.0229922
ZSCAN1	0.253674	2.8381	3.49925	0.00072106	0.0362345	-0.610437	3.38144	0.0229922
AC051619.5	0.791085	2.80499	3.7575	0.000722556	0.0362345	0.19875	3.38087	0.0229922
FAM138C	1.19196	2.3752	5.047	0.000726619	0.0362494	4.36368	3.37933	0.0230017
FGF18	-0.56689	-0.395526	-4.68166	0.000726881	0.0362494	2.94009	-3.37923	0.0230017
FABP5	0.523807	4.18853	3.57159	0.000731957	0.0363673	-0.353432	3.37732	0.0230764
AC024257.3	0.463712	2.90352	3.84	0.000736754	0.0363673	0.44752	3.37552	0.0230764
AL359636.2	0.503834	3.85048	3.49263	0.00073701	0.0363673	-0.726358	3.37543	0.0230764
AP005059.1	0.393467	5.05574	3.55375	0.000737704	0.0363673	-0.42419	3.37517	0.0230764
TMED6	-0.248012	1.04323	-3.49167	0.000739344	0.0363673	-0.567099	-3.37456	0.0230764
PIGQ	0.316462	3.96683	3.75934	0.0007422	0.0364083	0.200111	3.3735	0.0231025
AL049569.1	0.412306	3.26243	3.56623	0.00074455	0.0364243	-0.384977	3.37263	0.0231126
AC091946.1	0.626252	3.83407	3.48712	0.000750541	0.0366179	-0.703644	3.37042	0.0232355
CAPN10-DT	0.356199	2.7621	3.62907	0.000755539	0.0367621	-0.223701	3.36859	0.023327
AC092338.3	0.278735	5.89836	3.73927	0.000765815	0.0371616	0.0121397	3.36486	0.0235805
AC061958.1	0.789454	1.25279	3.47895	0.000771033	0.0373143	-0.597438	3.36299	0.0236774
AC093675.1	0.672852	1.17206	3.47793	0.000773607	0.0373384	-0.604344	3.36207	0.0236927
AL450384.2	0.341047	7.41176	3.61587	0.000777963	0.0374483	-0.383525	3.36052	0.0237624
FMR1	-0.122336	4.22798	-3.47226	0.000788194	0.037813	-0.90649	-3.35691	0.0239938
NR2F1-AS1	-0.253556	5.70324	-4.02701	0.000789739	0.037813	0.905773	-3.35637	0.0239938
DNASE1	0.201509	5.03697	3.84086	0.000796828	0.0380512	0.401303	3.35389	0.024145
HIPK3	-0.117784	5.89688	-3.92711	0.000805458	0.0383616	0.520264	-3.35091	0.0243419
RYR2	-0.33864	6.43969	-3.46483	0.000807671	0.0383654	-1.16853	-3.35015	0.0243444
PM20D1	0.424034	4.12107	3.55256	0.000810576	0.0384021	-0.408643	3.34916	0.0243676
EYS	-0.1982	12.7847	-3.76258	0.000817435	0.0386254	-0.246821	-3.34682	0.0245093
TKFC	0.198397	2.67289	3.45878	0.000823891	0.0388286	-0.727697	3.34464	0.0246383
DOCK9	-0.274474	8.22199	-3.8403	0.00084995	0.0398905	0.240326	-3.33599	0.0253121
LINC01440	1.37467	0.364006	4.37138	0.000850855	0.0398905	1.64516	3.3357	0.0253121
AL157871.4	0.339632	4.28016	3.53971	0.000856389	0.0400456	-0.448822	3.3339	0.0254105
ZNF764	-0.375308	2.17615	-3.47987	0.000860679	0.040142	-0.727689	-3.33251	0.0254717
SKA3	-1.86642	0.087177	-3.60407	0.000867928	0.0403755	-0.859918	-3.33017	0.0256198
AL354809.1	-0.47821	2.25535	-3.47011	0.000872261	0.0404724	-0.749916	-3.32878	0.0256813
EPX	0.36795	1.624	3.43942	0.000877835	0.0406264	-0.7168	3.32701	0.025779
SLC35F4	-0.377411	7.06855	-3.43245	0.000898045	0.0414551	-1.33947	-3.32066	0.0263049
RNPS1	0.111669	5.61828	3.43162	0.000900478	0.0414612	-1.14427	3.31991	0.0263087
NOMO1	0.301634	3.38923	3.60455	0.000903475	0.041493	-0.259675	3.31898	0.0263289
SKP2	-0.204138	3.22652	-3.42792	0.000911445	0.0417525	-0.926293	-3.31652	0.0264936
ATP6V1D	0.121734	6.64231	3.42549	0.000918689	0.0418881	-1.258	3.31431	0.0265796
LINC01498	-0.39328	-0.169437	-3.4243	0.000922245	0.0418881	-0.765696	-3.31323	0.0265796
LINC00457	-0.369258	9.05833	-3.58335	0.000925469	0.0418881	-0.547213	-3.31226	0.0265796
JAKMIP3	0.637671	1.50459	4.15888	0.000927115	0.0418881	1.44651	3.31176	0.0265796
CYB5D2	0.218267	4.957	3.7648	0.000927451	0.0418881	0.12448	3.31166	0.0265796
FHDC1	-0.398993	0.617956	-3.42228	0.000928365	0.0418881	-0.766254	-3.31138	0.0265796
CRLF3	0.247392	7.70164	3.86177	0.000939844	0.0421729	0.215492	3.30794	0.0267603
ERVK9-11	-0.45814	0.837192	-4.03704	0.000940495	0.0421729	0.927143	-3.30775	0.0267603
AL353151.2	0.277368	5.28102	3.41771	0.000942263	0.0421729	-1.13882	3.30722	0.0267603
RUSC1-AS1	0.375602	0.789864	3.41647	0.0009461	0.0421729	-0.772882	3.30608	0.0267603
CERS5	0.200101	5.85379	3.8424	0.000946389	0.0421729	0.221223	3.306	0.0267603
ZFP91	-0.19665	4.77523	-3.97378	0.00095213	0.0423239	0.760277	-3.3043	0.0268562
UAP1	-0.214635	3.66191	-4.31647	0.000961771	0.0424655	1.95217	-3.30148	0.026946
C11orf65	0.19319	6.44005	3.73082	0.000962236	0.0424655	-0.0499208	3.30134	0.026946
NBN	-0.281161	3.3215	-3.41122	0.000962391	0.0424655	-0.983439	-3.3013	0.026946
KANK1	-0.165873	7.99683	-4.18171	0.000980036	0.0431383	1.18755	-3.2962	0.027373
AC073167.1	0.374036	5.21014	3.44117	0.000986403	0.0431851	-0.754731	3.29438	0.0274026
CRNDE	0.572616	3.06558	3.52772	0.000987214	0.0431851	-0.490876	3.29415	0.0274026
AC005674.2	-0.352599	3.81994	-3.66643	0.000988655	0.0431851	-0.0876094	-3.29374	0.0274026
CEP97	-0.17331	4.65602	-4.15483	0.000990694	0.0431851	1.29834	-3.29316	0.0274026
ZBTB2	-0.223324	1.6557	-3.39777	0.00100538	0.0436748	-0.864934	-3.28902	0.0277134
SNRPA1	0.224057	5.2287	4.10327	0.00100678	0.0436748	1.16857	3.28863	0.0277134
RMND5B	0.220597	5.57325	3.56595	0.00101603	0.04397	-0.449996	3.28605	0.0279007
CTHRC1	-0.563898	0.401821	-3.39261	0.00102231	0.0441359	-0.838129	-3.28431	0.028006
SNAP25-AS1	0.370516	8.43753	3.42181	0.00103677	0.0445713	-0.965402	3.28035	0.0282823
TACC3	-0.305321	2.10482	-3.38811	0.00103735	0.0445713	-0.926587	-3.2802	0.0282823
ATF7IP	-0.167129	7.16855	-4.05835	0.00104708	0.0448821	0.791368	-3.27756	0.0284795
ANGPTL7	0.5143	1.99853	3.65425	0.00104999	0.0449002	-0.191549	3.27678	0.028491
CNTN3	-0.573259	-0.367273	-3.38	0.00106493	0.0454313	-0.901563	-3.27279	0.0288279
MIB1	-0.135258	6.6071	-3.3762	0.00107809	0.0456975	-1.42725	-3.26931	0.0289969
CCDC24	0.253486	5.42649	3.65408	0.00108	0.0456975	-0.204491	3.26881	0.0289969
ABI1	-0.173463	5.18579	-3.37529	0.00108125	0.0456975	-1.29148	-3.26848	0.0289969
KRBA2	-0.305717	6.78811	-3.4042	0.00108133	0.0456975	-0.940012	-3.26846	0.0289969
AC011476.3	0.433088	4.91995	3.79542	0.00108952	0.0459357	0.283014	3.26633	0.029148
USP38	-0.188326	3.80621	-4.44917	0.00109767	0.0461601	2.40304	-3.26422	0.0292904
GABRR2	-0.631047	0.951913	-3.36938	0.00110208	0.0461601	-0.911033	-3.26308	0.0292904
TMEM30A	-0.166398	5.55842	-3.36861	0.00110481	0.0461601	-1.36163	-3.26238	0.0292904
LINC01116	0.400289	3.77745	3.6096	0.00110509	0.0461601	-0.246103	3.26231	0.0292904
AC233723.1	0.306803	0.821234	3.36399	0.00112141	0.0466542	-0.917991	3.25815	0.0296039
DNAAF5	-0.201293	4.4899	-3.73597	0.00112211	0.0466542	0.0631631	-3.25797	0.0296039
KIF20B	0.285598	2.25227	3.35986	0.0011364	0.0469707	-0.979805	3.25438	0.0298047
LINC00378	-0.385582	1.02209	-3.35949	0.00113778	0.0469707	-0.936092	-3.25404	0.0298047
AC008938.1	0.604544	3.91625	3.64936	0.00114081	0.0469707	-0.135045	3.25328	0.0298047
LINC01356	0.202626	5.47644	3.35852	0.00114135	0.0469707	-1.34876	3.25315	0.0298047
LINC02296	-0.934956	2.87195	-3.43255	0.00114276	0.0469707	-0.744728	-3.25279	0.0298047
PPP5D1	0.367977	2.24922	3.59099	0.00115058	0.047005	-0.334808	3.25086	0.0298265
ZC3H6	0.1939	6.70008	3.35588	0.00115108	0.047005	-1.47214	3.25073	0.0298265
ITGAL	0.211426	5.26696	3.35575	0.00115155	0.047005	-1.31607	3.25062	0.0298265
LEMD3	-0.208355	5.94811	-3.97036	0.00115404	0.047005	0.61267	-3.25	0.0298265
SLC27A5	0.258216	3.18868	3.73352	0.00115834	0.0470262	0.120505	3.24895	0.02984
RB1-DT	0.592562	1.5608	3.87253	0.00116382	0.0470262	0.549037	3.2476	0.02984
AL022322.2	0.43537	2.75134	3.73958	0.00116599	0.0470262	0.139916	3.24707	0.02984
CTDSPL	0.556449	2.31646	3.35144	0.00116762	0.0470262	-0.979406	3.24667	0.02984
AC131568.1	0.343204	3.71048	3.71735	0.00116762	0.0470262	0.0689517	3.24667	0.02984
ACAP2-IT1	-0.371996	0.214918	-3.3489	0.00117721	0.0473064	-0.957756	-3.24435	0.0300178
C8orf31	0.501287	0.992171	3.692	0.00118332	0.0474462	-0.227844	3.24287	0.0301065
INSR	0.226926	7.42019	3.41927	0.00119302	0.0475986	-0.955293	3.24054	0.0302032
CHSY1	-0.182191	5.1909	-3.34446	0.0011941	0.0475986	-1.40741	-3.24029	0.0302032
LINC00893	0.44208	3.83729	3.42569	0.00119876	0.0475986	-0.763617	3.23917	0.0302032
GLDC	-1.09846	0.966496	-3.34275	0.00120066	0.0475986	-1.02118	-3.23872	0.0302032
AS3MT	0.252485	2.51305	3.34264	0.00120109	0.0475986	-1.04064	3.23862	0.0302032
SLC5A3	-0.309662	2.98041	-3.96161	0.00120485	0.0475986	0.809293	-3.23773	0.0302032
LINC02649	1.33101	6.14309	3.78247	0.00120887	0.0475986	0.0744931	3.23678	0.0302032
RO60	-0.220924	6.9107	-3.53848	0.00120934	0.0475986	-0.604179	-3.23667	0.0302032
AC130456.2	-0.45157	1.96553	-3.33995	0.00121152	0.0475986	-1.09282	-3.23615	0.0302032
CLIC2	-0.340732	0.9913	-3.33942	0.00121356	0.0475986	-0.995614	-3.23567	0.0302032
RPIA	-0.231593	3.29269	-3.33866	0.00121652	0.0476109	-1.18521	-3.23498	0.030211
RNF217	-0.225134	6.53956	-3.46893	0.0012215	0.047702	-0.8061	-3.23381	0.0302688
MATR3.1	-0.179172	3.57859	-3.33526	0.00122987	0.0479249	-1.25929	-3.23186	0.0304103
C6orf132	0.47599	3.68693	4.2346	0.00123727	0.0480772	1.69603	3.23015	0.0305069
FDFT1	0.294989	5.7654	3.33292	0.00123912	0.0480772	-1.43797	3.22972	0.0305069
CCT6B	0.294462	2.51453	3.33152	0.0012447	0.0481901	-1.06941	3.22843	0.0305785
TRIOBP	0.321704	2.19718	3.32494	0.00127119	0.0491099	-1.076	3.22241	0.0311621
RAB27A	-0.297771	3.26093	-3.32349	0.00127711	0.049233	-1.27005	-3.22107	0.0312403
PREX1	-0.47512	4.489	-4.40811	0.00128657	0.0494309	2.17562	-3.21896	0.0313658
C16orf58	0.253732	4.23187	4.44232	0.00128953	0.0494309	2.36982	3.2183	0.0313658
PSMC2	0.116949	5.22204	3.31939	0.00129392	0.0494309	-1.43849	3.21733	0.0313658
AC007370.2	-0.464775	1.36188	-4.15283	0.00129586	0.0494309	1.44841	-3.2169	0.0313658
GPATCH1	0.303361	5.3009	3.31881	0.00129634	0.0494309	-1.41971	3.21679	0.0313658
POPDC3	-0.495103	-0.536219	-3.31824	0.00129872	0.0494309	-1.0583	-3.21626	0.0313658
LINC01619	-0.850169	1.65402	-3.90122	0.0013081	0.049683	0.630191	-3.2142	0.0315258
LINC00499	0.712437	1.44654	3.38379	0.00131672	0.0498069	-1.06546	3.21231	0.0316044
CIPC	-0.216691	5.3001	-3.42098	0.0013169	0.0498069	-0.831197	-3.21227	0.0316044
C21orf91	-0.208145	4.12826	-3.31047	0.0013313	0.0502462	-1.37421	-3.20915	0.0318832
MXRA7	0.207322	6.72028	3.30838	0.00134021	0.0504282	-1.60946	3.20723	0.0319986
MORF4L1	0.149141	6.92941	3.91891	0.00134321	0.0504282	0.329944	3.20658	0.0319986
TEX52	0.442681	2.17327	3.37504	0.00134528	0.0504282	-0.983478	3.20614	0.0319986
TBC1D17	0.263102	4.63728	3.82205	0.00134733	0.0504282	0.312386	3.2057	0.0319986
PARVB	-0.293237	3.84443	-3.30444	0.00135712	0.0505785	-1.35134	-3.20362	0.0320941
ZNF337-AS1	0.150884	5.88733	3.70039	0.00135811	0.0505785	-0.133676	3.20341	0.0320941
ERCC4	0.142977	3.95554	3.30383	0.00135977	0.0505785	-1.3191	3.20306	0.0320941
CASP6	-0.234176	2.48962	-3.30086	0.00137271	0.0509545	-1.2123	-3.20033	0.0323326
AC104237.3	-1.25599	2.14695	-3.32488	0.00138583	0.0511289	-1.11634	-3.19759	0.0324433
KLHL29	-0.16108	7.18451	-3.29781	0.0013861	0.0511289	-1.71113	-3.19753	0.0324433
TRAPPC6A	0.304359	3.25214	3.4544	0.00138951	0.0511289	-0.681889	3.19682	0.0324433
UHRF1BP1L	-0.142883	5.94075	-4.18169	0.0013927	0.0511289	1.29033	-3.19616	0.0324433
AIM2	0.933815	1.63609	4.19832	0.00139791	0.0511289	1.6058	3.19508	0.0324433
AC011997.1	-0.372564	2.72694	-3.83341	0.00139909	0.0511289	0.429348	-3.19484	0.0324433
AC005726.5	0.321423	4.06113	3.43323	0.00139932	0.0511289	-0.750275	3.19479	0.0324433
SMIM19	0.23077	3.6371	3.79631	0.00140013	0.0511289	0.291048	3.19462	0.0324433
CHD8	-0.15052	5.78446	-3.6155	0.00140689	0.0512601	-0.398621	-3.19323	0.0325265
HIPK1	-0.16676	6.69232	-3.36908	0.00140942	0.0512601	-1.06134	-3.19272	0.0325265
ATP6AP1L	0.189983	5.43152	3.29079	0.00141737	0.0514455	-1.54205	3.19109	0.0326442
AC012020.1	-0.507906	2.97791	-3.30154	0.00142135	0.051486	-1.1248	-3.19028	0.0326699
AC105411.1	0.404268	1.82128	3.67505	0.00142911	0.0515755	-0.0353815	3.18871	0.0327267
TECPR1	0.185755	6.1128	3.35059	0.00143203	0.0515755	-1.07667	3.18812	0.0327267
KAT6A	-0.144959	7.31454	-3.72723	0.00143241	0.0515755	-0.224055	-3.18804	0.0327267
AC087286.2	0.460737	3.62609	3.60339	0.00144599	0.0519603	-0.27987	3.18531	0.0329709
AC010974.2	0.434478	5.12458	3.31794	0.00144937	0.0519781	-1.10194	3.18463	0.0329821
DENND2C	-0.204508	5.40719	-3.62059	0.00145716	0.0521534	-0.375512	-3.18308	0.0330934
ZNF627	0.248737	4.35803	3.62505	0.00146611	0.052288	-0.245097	3.18131	0.0331788
ATP13A3	-0.125154	5.86409	-3.28	0.00146672	0.052288	-1.6495	-3.18119	0.0331788
BX004807.1	0.424909	1.82244	3.28559	0.00148297	0.0527626	-1.27509	3.178	0.03348
AL353768.1	0.468288	1.66393	3.3713	0.00150069	0.0532877	-1.03897	3.17455	0.0338131
AC240274.1	0.601963	1.55243	3.29165	0.00150822	0.0534497	-1.29441	3.1731	0.0339159
AC105219.4	0.317172	0.785713	3.2701	0.00151342	0.0534818	-1.17083	3.1721	0.0339363
RPEL1	0.731715	0.679643	3.39482	0.0015157	0.0534818	-1.15244	3.17166	0.0339363
TJP2	-0.4646	4.52658	-4.34378	0.00151804	0.0534818	1.99478	-3.17121	0.0339363
NPLOC4	0.187916	5.96581	3.31191	0.00152248	0.0535337	-1.17073	3.17036	0.0339692
EFHC2	-0.249035	4.9142	-3.2672	0.00152736	0.0535351	-1.60229	-3.16943	0.0339701
ZFR2	0.292343	5.98587	3.49887	0.00153082	0.0535351	-0.707452	3.16878	0.0339701
TCHP	0.189419	5.42137	3.2729	0.00153388	0.0535351	-1.22946	3.1682	0.0339701
SLC39A8	-0.242585	5.1779	-3.67026	0.00153473	0.0535351	-0.248262	-3.16803	0.0339701
AL590822.2	0.482112	0.963426	3.43323	0.00153739	0.0535351	-0.957188	3.16753	0.0339701
AC020978.3	0.38784	2.17043	3.40812	0.00155661	0.0540996	-0.85337	3.16392	0.0343283
ZNF541	0.528943	2.19973	4.01771	0.00156105	0.0541496	0.980899	3.16309	0.03436
HSPB3	-0.998821	1.02043	-3.51186	0.0015658	0.0541958	-0.722715	-3.1622	0.0343893
PAAF1	0.166359	5.67237	3.43097	0.00156841	0.0541958	-0.882561	3.16172	0.0343893
GDAP1	-0.246332	8.28128	-3.25803	0.00157228	0.0542257	-1.90532	-3.161	0.0344083
AC097534.2	0.640598	6.08993	3.69131	0.00158365	0.0544603	-0.190801	3.1589	0.0345572
GNPTG	0.22614	4.7582	3.3114	0.00158513	0.0544603	-1.1086	3.15863	0.0345572
HARS	0.222248	4.78513	3.31299	0.0015886	0.0544752	-1.10454	3.15799	0.0345666
EPHB1	0.428031	6.3926	3.64915	0.00159742	0.0546643	-0.305637	3.15638	0.0346866
BAALC-AS1	-0.232016	3.19269	-3.25245	0.00160018	0.0546643	-1.4254	-3.15587	0.0346866
VPREB3	-0.690072	0.913692	-3.26104	0.00161267	0.0549247	-1.51958	-3.15361	0.0348519
DCBLD1	-0.256516	3.57516	-4.50253	0.00161498	0.0549247	2.62296	-3.15319	0.0348519
TMEM41A	0.156638	3.26006	3.24899	0.00161773	0.0549247	-1.39268	3.15269	0.0348519
SALL2	-0.538475	2.19521	-3.36039	0.00162001	0.0549247	-0.995476	-3.15228	0.0348519
AC009137.1	0.343713	3.3576	3.35406	0.00162987	0.0551511	-0.957674	3.15051	0.0349955
TSEN2	0.178925	5.72661	3.29576	0.00164151	0.0551511	-1.20411	3.14843	0.0349955
AC174065.1	0.570747	4.02144	3.63139	0.00164257	0.0551511	-0.308694	3.14824	0.0349955
AL162390.1	0.241927	2.77559	3.24388	0.00164395	0.0551511	-1.3384	3.14799	0.0349955
YKT6	0.183848	2.84445	3.24292	0.00164891	0.0551511	-1.36364	3.14711	0.0349955
PITPNB	-0.165135	5.05763	-3.24271	0.00165002	0.0551511	-1.67393	-3.14692	0.0349955
AC022762.2	-0.46389	0.621672	-3.88927	0.00165031	0.0551511	0.469788	-3.14686	0.0349955
IQANK1	0.309937	4.08827	3.65106	0.00165659	0.0551511	-0.221708	3.14575	0.0349955
VLDLR-AS1	-0.322066	7.81487	-3.57764	0.00165694	0.0551511	-0.667554	-3.14569	0.0349955
SVIL	0.168619	7.54398	3.3619	0.00165732	0.0551511	-1.16398	3.14563	0.0349955
NCOA5	-0.186931	5.73139	-3.57031	0.00167067	0.0553734	-0.55017	-3.14328	0.0351366
SPDYE5	0.287139	5.12896	3.65824	0.00167225	0.0553734	-0.237555	3.143	0.0351366
LINC00877	0.4463	1.94337	3.47511	0.00167323	0.0553734	-0.660918	3.14283	0.0351366
FGF9	0.966273	0.482956	3.43865	0.00167891	0.0554594	-0.928239	3.14184	0.0351911
CHST4	0.33904	2.39077	3.80874	0.00168414	0.0555303	0.348006	3.14093	0.0352361
ADCK5	0.312302	3.21005	3.57655	0.00171137	0.0563252	-0.333938	3.13623	0.0357405
ESCO1	-0.136091	4.96851	-3.23042	0.00171501	0.0563417	-1.70812	-3.1356	0.035751
NBPF26	-0.301779	2.88757	-3.22945	0.00172019	0.0564039	-1.48471	-3.13472	0.0357905
SSBP2	-0.139997	8.76465	-3.22836	0.00172611	0.0564039	-2.01001	-3.13371	0.0357905
CRB1	-0.190032	8.29154	-3.34739	0.00172646	0.0564039	-1.21615	-3.13365	0.0357905
PIK3R3	-0.187238	5.81966	-3.22775	0.00172943	0.0564039	-1.79279	-3.13315	0.0357905
NOL4	-0.472162	3.01915	-3.2266	0.00173564	0.0565041	-1.53092	-3.13209	0.035854
OCLN	-0.618807	1.96975	-3.36539	0.00174401	0.0566013	-0.99039	-3.13068	0.0359157
VTA1	-0.165414	4.59662	-4.04494	0.00174656	0.0566013	0.931618	-3.13025	0.0359157
KIF1C	-0.267304	1.24224	-3.22388	0.00175053	0.0566013	-1.31611	-3.12959	0.0359157
AC018647.1	0.48467	0.504471	3.7158	0.0017512	0.0566013	0.0167675	3.12947	0.0359157
AC007387.3	0.533937	3.55159	3.2229	0.0017559	0.0566515	-1.47079	3.12869	0.0359476
ING4	0.197439	4.67922	4.00544	0.0017658	0.0567142	0.846347	3.12703	0.0359874
DDHD1	-0.161114	7.3787	-3.32387	0.00176878	0.0567142	-1.27486	-3.12654	0.0359874
AQR	-0.204892	7.27976	-3.31119	0.00177204	0.0567142	-1.25799	-3.126	0.0359874
STPG2	-0.233888	8.12615	-3.43568	0.00177295	0.0567142	-1.06246	-3.12584	0.0359874
AC005697.2	0.591242	0.731761	3.2197	0.0017736	0.0567142	-1.30614	3.12574	0.0359874
AL357052.1	-0.576442	-0.132924	-3.2171	0.00178808	0.0569556	-1.31058	-3.12335	0.0361406
AARS	0.178667	5.7478	3.3679	0.0017891	0.0569556	-1.04286	3.12318	0.0361406
MSH2	-0.184497	8.25154	-3.40591	0.00179064	0.0569556	-1.10956	-3.12292	0.0361406
AC027243.2	-0.261788	1.24852	-3.21391	0.00180599	0.0573425	-1.34866	-3.12041	0.0363861
COX6B2	0.427036	0.227173	3.21175	0.00181824	0.0576299	-1.33302	3.11842	0.0365684
RIN2	0.214755	7.58162	3.20924	0.00183256	0.0579033	-1.96061	3.11611	0.0367419
AC093898.1	0.860997	3.13086	3.20911	0.0018333	0.0579033	-1.53623	3.11599	0.0367419
HAVCR2	-0.363247	3.33008	-3.90559	0.00183771	0.057941	0.65157	-3.11528	0.0367658
MARVELD1	0.459417	-0.171294	3.20685	0.00184633	0.058111	-1.37136	3.1139	0.0368737
MESP2	0.244356	4.28515	3.20591	0.00185173	0.0581791	-1.62122	3.11304	0.0369169
CA2	-0.501655	6.55046	-3.27594	0.00186074	0.0583604	-1.31851	-3.1116	0.037032
AL390774.2	0.397239	3.98075	3.2037	0.00187291	0.0584191	-1.36077	3.10968	0.0370692
SMG1	-0.157922	6.19625	-4.47848	0.00187407	0.0584191	2.32415	-3.1095	0.0370692
AC124852.1	-0.639656	0.518086	-4.08855	0.00187414	0.0584191	1.15384	-3.10949	0.0370692
RABL2A	0.129803	4.92816	3.20126	0.0018788	0.0584191	-1.73818	3.10875	0.0370692
MINDY4	-0.231177	4.71038	-3.50365	0.00187883	0.0584191	-0.668885	-3.10875	0.0370692
AC119673.2	0.753534	6.7894	3.34517	0.00191251	0.0593637	-1.18086	3.10349	0.0376686
ZNF800	-0.128457	5.19918	-3.19463	0.00191803	0.0594324	-1.83149	-3.10264	0.0377122
TAFA1	-0.58603	-0.465386	-3.19262	0.00193005	0.0597024	-1.3769	-3.10079	0.0378835
CCDC130	0.200084	5.54377	3.2687	0.00193381	0.0597158	-1.28224	3.10021	0.037892
EVI2B	0.411731	3.5863	3.19537	0.00194134	0.0598457	-1.3791	3.09906	0.0379745
ADAM22	-0.282179	5.17269	-3.80901	0.00196146	0.0598615	0.215291	-3.09601	0.0379844
DCAKD	0.219619	5.63534	3.22155	0.00196502	0.0598615	-1.39676	3.09547	0.0379844
AC092828.1	-0.228986	3.52754	-3.97707	0.00196943	0.0598615	0.791252	-3.0948	0.0379844
ST3GAL4	-0.326604	4.59941	-3.23796	0.00196962	0.0598615	-1.29827	-3.09478	0.0379844
GRB14	-0.559642	2.58527	-3.32346	0.00197289	0.0598615	-1.05684	-3.09428	0.0379844
AC026979.4	-0.260568	1.90357	-3.18556	0.00197292	0.0598615	-1.46644	-3.09428	0.0379844
LINC01402	-0.697285	-0.173962	-3.92071	0.00197507	0.0598615	0.602283	-3.09396	0.0379844
RBM41	-0.186257	5.0969	-3.40373	0.00197706	0.0598615	-0.93193	-3.09366	0.0379844
TTC30A	-0.441153	2.59361	-3.19642	0.00197752	0.0598615	-1.41272	-3.09359	0.0379844
PACRG	-0.213122	7.86706	-3.40576	0.00197783	0.0598615	-1.14275	-3.09354	0.0379844
AC018653.3	0.303597	1.56051	3.18467	0.00197842	0.0598615	-1.42333	3.09345	0.0379844
AL133410.1	0.375824	2.58975	3.56555	0.00198386	0.0599253	-0.372778	3.09264	0.0380249
ZNF277	-0.148534	5.14893	-3.70232	0.00199845	0.0600909	-0.244843	-3.09046	0.03813
AC008946.1	0.35866	1.12818	3.18054	0.00200394	0.0600909	-1.40698	3.08965	0.03813
STT3B	-0.173579	6.61581	-3.61483	0.0020041	0.0600909	-0.542867	-3.08962	0.03813
AC091132.2	0.478267	1.4232	3.33173	0.00200513	0.0600909	-1.13198	3.08947	0.03813
YTHDF2	-0.175557	4.89026	-3.29056	0.00200604	0.0600909	-1.18599	-3.08934	0.03813
SUPT20H	-0.126348	5.69482	-3.59626	0.00201284	0.0601946	-0.528834	-3.08833	0.0381958
MAATS1	-0.193523	6.06709	-3.31429	0.00201839	0.0602442	-1.24191	-3.08751	0.0382273
AL445248.1	0.227989	4.11429	3.55418	0.00202119	0.0602442	-0.48161	3.0871	0.0382273
LINC01572	0.290457	4.00135	3.78912	0.00203094	0.0602815	0.183054	3.08567	0.038251
GABPB1-AS1	0.303896	7.05596	3.40761	0.00203292	0.0602815	-1.0531	3.08538	0.038251
NPDC1	0.224729	4.55346	3.48599	0.00203341	0.0602815	-0.676687	3.08531	0.038251
NCKAP5-AS1	0.434091	3.52351	3.22724	0.00203919	0.0602815	-1.29573	3.08446	0.038251
COQ7	0.217293	3.81309	3.51564	0.00203961	0.0602815	-0.548282	3.0844	0.038251
AL645465.1	-0.497592	1.60529	-3.51435	0.00204253	0.0602815	-0.583071	-3.08398	0.038251
CIT	-0.232887	5.92085	-3.78099	0.00205224	0.0604688	-0.0705819	-3.08257	0.0383698
ZNF281	-0.364962	3.28703	-3.18632	0.00205625	0.060488	-1.40591	-3.08199	0.038382
NEFL	1.58736	2.80643	3.31357	0.00206693	0.0605611	-1.06923	3.08044	0.0384284
MFSD10	0.503371	1.94777	3.1704	0.00206797	0.0605611	-1.46733	3.08029	0.0384284
ZNF726	0.384299	0.580586	3.16997	0.00207073	0.0605611	-1.43123	3.0799	0.0384284
ALDH1A2	1.00306	3.6472	3.39708	0.00207219	0.0605611	-0.872019	3.07969	0.0384284
NDRG4	1.09761	2.45427	3.23263	0.00208398	0.0607991	-1.29673	3.078	0.0385794
NBPF3	-0.221624	3.21257	-3.66071	0.00208709	0.0607991	-0.118922	-3.07755	0.0385794
HERC6	-0.31708	3.80656	-3.16656	0.00209275	0.0608123	-1.74636	-3.07674	0.0385878
NANS	0.263679	5.20237	3.57096	0.0020978	0.0608123	-0.537354	3.07602	0.0385878
ZMYM4-AS1	0.31543	4.52247	3.24896	0.00209921	0.0608123	-1.28179	3.07583	0.0385878
IMPAD1	-0.164574	4.74609	-3.59572	0.00210136	0.0608123	-0.391424	-3.07552	0.0385878
PPP4R2	-0.105879	5.9967	-3.1645	0.00210616	0.0608123	-1.99269	-3.07484	0.0385878
DTWD1	-0.114943	5.31097	-3.16424	0.00210781	0.0608123	-1.92632	-3.07461	0.0385878
WDR88	0.249003	3.91255	3.31709	0.00212301	0.061153	-1.07591	3.07246	0.038804
TP53BP1	0.146815	6.85691	3.19996	0.00212737	0.0611805	-1.53316	3.07185	0.0388214
AC015849.3	0.287237	5.46269	3.32174	0.00213779	0.0613822	-1.18848	3.07039	0.0389494
AC025164.1	0.293585	1.94418	3.15719	0.00215426	0.0616913	-1.50375	3.0681	0.0391455
SLC28A2	0.685791	1.8447	3.50961	0.00215541	0.0616913	-0.547179	3.06794	0.0391455
ARHGAP18	-1.42098	3.49078	-3.30593	0.0021662	0.0618798	-1.08887	-3.06645	0.0392651
GP6	0.303133	4.12671	3.15501	0.00216887	0.0618798	-1.75173	3.06608	0.0392651
PCF11	-0.198504	5.67629	-3.24908	0.00218259	0.0621728	-1.35094	-3.06419	0.0394511
LINC01309	0.431616	1.78955	3.28559	0.00218815	0.0622327	-1.20673	3.06343	0.0394891
PALLD	-0.330467	5.70452	-3.68352	0.00219534	0.0622466	-0.40447	-3.06245	0.0394979
HCFC2	-0.153417	5.14897	-3.57318	0.00219556	0.0622466	-0.608113	-3.06242	0.0394979
AC076966.2	0.3882	2.02019	3.15006	0.00220227	0.0622846	-1.53753	3.06151	0.039522
CCDC102B	0.246884	5.56356	3.27034	0.00220382	0.0622846	-1.30908	3.0613	0.039522
AC005884.1	0.351875	3.16346	3.2507	0.00220861	0.0623224	-1.23301	3.06064	0.039546
AC132153.1	-0.526744	2.79726	-3.54603	0.00222041	0.0625572	-0.429388	-3.05905	0.039695
AL121768.1	0.313541	4.34704	3.37802	0.00223011	0.0627323	-0.930828	3.05774	0.0398061
AC007114.2	0.267982	5.12366	3.53933	0.00223725	0.0627957	-0.656928	3.05678	0.0398464
SPSB2	0.216378	3.37472	3.14465	0.00223934	0.0627957	-1.71484	3.0565	0.0398464
CRYM	0.767724	1.19216	3.27255	0.00224391	0.0628261	-1.30892	3.05589	0.0398656
LPGAT1	-0.170091	6.57603	-3.54473	0.00224838	0.0628534	-0.729552	-3.0553	0.0398829
HNRNPU	-0.142657	7.53768	-3.38961	0.00225614	0.0629322	-1.15583	-3.05426	0.039933
MCC	-0.171298	8.30996	-3.14155	0.00226082	0.0629322	-2.23918	-3.05364	0.039933
ILDR2	-0.245991	5.00333	-3.34903	0.00226169	0.0629322	-1.11011	-3.05353	0.039933
RAMP1	1.68629	1.27249	3.48846	0.00227647	0.0631201	-0.736252	3.05157	0.0400522
TCN2	0.231429	3.82765	3.45838	0.00227872	0.0631201	-0.69793	3.05128	0.0400522
NDOR1	0.272967	3.73015	3.20975	0.00227985	0.0631201	-1.34761	3.05113	0.0400522
AC069431.1	0.448879	0.359021	3.1373	0.00229058	0.0631201	-1.52036	3.04972	0.0400522
AC010207.1	-0.646887	-0.286594	-3.44911	0.00229067	0.0631201	-1.10698	-3.0497	0.0400522
SLC35F2	-0.410946	5.60421	-3.5373	0.00229072	0.0631201	-0.562218	-3.0497	0.0400522
OTC	0.66226	0.915411	3.48716	0.00229298	0.0631201	-0.648202	3.0494	0.0400522
ASCC2	0.231137	5.195	3.32919	0.00231584	0.0636519	-1.12272	3.04642	0.0403896
AC006974.2	1.15004	1.0965	3.38927	0.0023196	0.0636581	-0.898879	3.04593	0.0403936
AC044840.1	0.425694	2.48794	3.28934	0.00232966	0.0638371	-1.13086	3.04463	0.0405071
TMEM191C	0.50632	0.753543	3.12937	0.00234713	0.064218	-1.53529	3.04238	0.0407488
ARHGAP5	-0.135816	7.73992	-3.62997	0.00236062	0.0644197	-0.594895	-3.04066	0.0408768
AC024588.1	-0.645354	0.682335	-3.12736	0.00236166	0.0644197	-1.56897	-3.04052	0.0408768
PTPN12	-0.122408	5.77772	-3.12632	0.00236919	0.0644907	-2.08227	-3.03957	0.0409219
HEATR6	-0.20006	4.77951	-3.38031	0.00237143	0.0644907	-0.963755	-3.03928	0.0409219
SPNS1	0.260653	3.44201	3.8996	0.0023775	0.0645583	0.629645	3.03851	0.0409647
NCOR2	0.320012	5.50956	3.17841	0.00238247	0.0645957	-1.51645	3.03788	0.0409885
CYB5R3	0.24502	3.47436	3.37703	0.00238892	0.0646732	-0.920328	3.03707	0.0410377
CHIC2	-0.181101	4.90361	-3.76647	0.0024007	0.0648209	0.0211235	-3.03558	0.0411314
AC015871.1	-0.241255	4.01142	-3.67254	0.00241202	0.0648209	-0.199693	-3.03417	0.0411314
FAM174B	0.354707	5.70115	3.16501	0.00241242	0.0648209	-1.55818	3.03412	0.0411314
DUSP10	-0.195314	4.95732	-3.36792	0.00241584	0.0648209	-1.06274	-3.03369	0.0411314
SPI1	0.273718	2.83671	3.45672	0.00241979	0.0648209	-0.676551	3.0332	0.0411314
AC018638.6	-0.4239	1.88257	-3.75793	0.00242573	0.0648209	0.197516	-3.03246	0.0411314
NDUFA4L2	0.410947	3.63525	3.27929	0.00242825	0.0648209	-1.16207	3.03214	0.0411314
AP002748.6	0.295332	4.48864	3.39048	0.00243247	0.0648209	-0.92337	3.03162	0.0411314
DDIT4	0.65579	4.53326	3.45165	0.00243432	0.0648209	-0.860572	3.03139	0.0411314
PRKG1	-0.889904	5.76928	-3.36418	0.00243709	0.0648209	-1.0664	-3.03104	0.0411314
AC109630.1	-0.733607	0.255513	-4.15561	0.00243757	0.0648209	1.30733	-3.03099	0.0411314
LINC02612	0.711655	2.15531	3.13356	0.00243758	0.0648209	-1.53551	3.03098	0.0411314
BCL2L2-PABPN1	-0.250403	4.01748	-3.37663	0.00245093	0.0649377	-0.932879	-3.02933	0.0412055
ADGRE5	0.413016	0.0790736	3.52102	0.00245584	0.0649377	-0.534446	3.02873	0.0412055
LINC00870	0.319466	3.14609	3.43192	0.0024571	0.0649377	-0.768476	3.02858	0.0412055
AL592528.1	0.482539	1.87317	3.23381	0.00246123	0.0649377	-1.329	3.02807	0.0412055
DUSP18	-0.277788	4.94584	-3.46177	0.00246337	0.0649377	-0.772452	-3.0278	0.0412055
GALNT4	-0.323952	3.35193	-3.33621	0.00246455	0.0649377	-1.00677	-3.02766	0.0412055
GTPBP3	0.1876	3.33574	3.1131	0.00246722	0.0649377	-1.78029	3.02733	0.0412055
AL020995.1	0.31525	6.91768	3.27999	0.00248098	0.0652045	-1.40226	3.02565	0.0413748
AADAT	-0.237714	2.68797	-3.11042	0.00248751	0.0652575	-1.79065	-3.02486	0.0414084
AL133227.1	0.324911	4.66603	3.19966	0.00249025	0.0652575	-1.4234	3.02452	0.0414084
AC087500.1	0.219736	5.20686	3.22949	0.00249724	0.0653184	-1.39118	3.02368	0.0414471
NOL3	0.41463	4.71904	3.10881	0.00249982	0.0653184	-1.94173	3.02336	0.0414471
RP9	-0.219529	3.94642	-3.20985	0.0025069	0.0654083	-1.35741	-3.02251	0.0415041
DZIP1L	-0.211454	4.87768	-3.22934	0.00251103	0.0654213	-1.38542	-3.02201	0.0415124
LCMT2	-0.603995	0.495303	-3.15092	0.00252627	0.0657233	-1.77942	-3.02018	0.041704
GPLD1	0.206874	6.9156	3.10372	0.002539	0.065959	-2.20737	3.01865	0.0418536
SUSD3	-0.405124	2.2911	-3.10197	0.00255265	0.0661259	-1.75867	-3.01703	0.0419595
AC104777.2	0.449068	0.282779	3.10195	0.00255277	0.0661259	-1.63683	3.01702	0.0419595
AL157395.1	0.51779	-0.113404	3.10035	0.00256531	0.0662789	-1.63327	3.01553	0.0420565
AL109936.6	0.352213	2.99019	3.17666	0.00256604	0.0662789	-1.42651	3.01544	0.0420565
ANKRD33	0.281657	7.02868	3.35834	0.00257153	0.0663255	-1.22732	3.0148	0.0420861
AC020661.3	0.318301	3.08328	3.28578	0.00259893	0.0669365	-1.14074	3.01158	0.0424738
IGSF22	-0.542189	1.28447	-3.20667	0.00260605	0.0670238	-1.46617	-3.01075	0.0425292
ATF1	-0.118422	4.83399	-3.09307	0.00262294	0.0673621	-2.07431	-3.00879	0.0427439
LINC01920	0.52916	2.41153	3.53363	0.00263382	0.0675451	-0.556428	3.00753	0.04286
IQCH-AS1	0.216271	5.83862	3.13925	0.00267938	0.0686158	-1.64939	3.00231	0.0435394
CCDC144NL-AS1	0.760203	1.25795	3.2009	0.00268386	0.0686328	-1.47727	3.0018	0.0435502
AL021707.2	0.224527	2.11941	3.08414	0.00269519	0.0687607	-1.72885	3.00052	0.0436314
SIX4	-0.802307	0.473114	-3.59375	0.0026965	0.0687607	-0.488207	-3.00037	0.0436314
WSB1	0.22462	9.47637	3.39864	0.00270155	0.0687921	-1.32992	2.9998	0.0436513
AMOTL2	-0.163468	2.83868	-3.07924	0.00273567	0.0695159	-1.86625	-2.99598	0.0441105
C1orf35	0.209652	3.96807	3.47024	0.0027377	0.0695159	-0.760489	2.99575	0.0441105
AC079921.1	0.517387	1.22282	3.07697	0.00275463	0.0698473	-1.6754	2.99387	0.0443209
AC013437.1	-0.600995	1.22945	-3.29532	0.00276118	0.0698995	-1.21899	-2.99315	0.0443539
PPM1A	-0.185689	6.67457	-3.42881	0.00276884	0.0698995	-1.04246	-2.9923	0.0443539
AC068308.1	0.498767	2.32	3.09713	0.00276902	0.0698995	-1.6549	2.99228	0.0443539
MTBP	0.228466	3.99808	3.2883	0.00277425	0.0698995	-1.16345	2.9917	0.0443539
AP001347.1	0.212147	3.44459	3.07417	0.00277811	0.0698995	-1.91441	2.99128	0.0443539
LINC00910	0.264963	4.84248	3.33484	0.00277998	0.0698995	-1.09145	2.99107	0.0443539
AC108471.2	0.300283	2.52321	3.44591	0.00279075	0.0700723	-0.703692	2.98989	0.0444636
VTN	0.598192	4.58761	3.30983	0.00279475	0.0700751	-1.19935	2.98946	0.0444654
FBXL12	0.236739	3.85541	3.26872	0.00280175	0.0701528	-1.20889	2.98869	0.0445147
ART4	0.536807	4.75781	3.18249	0.00281259	0.0703266	-1.48096	2.98751	0.044625
RABEPK	0.216233	4.83283	3.50358	0.0028302	0.070443	-0.767953	2.9856	0.0446989
RPA3	0.377698	5.58684	3.07752	0.00283079	0.070443	-1.76751	2.98554	0.0446989
RAB3C	-0.241349	5.10454	-3.06745	0.00283535	0.070443	-2.17836	-2.98505	0.0446989
CELF6	0.156376	7.88217	3.47113	0.00283737	0.070443	-1.07739	2.98483	0.0446989
AL583810.1	-0.562292	-0.0667114	-3.82973	0.0028377	0.070443	0.115176	-2.98479	0.0446989
PRKCQ	1.24111	2.31236	3.06569	0.00285052	0.070443	-1.7503	2.98341	0.0446989
NPIPA8	0.832014	-0.787647	3.06526	0.00285425	0.070443	-1.72788	2.98301	0.0446989
AC010320.4	0.385718	3.10621	3.09468	0.0028546	0.070443	-1.63444	2.98298	0.0446989
ENO1-AS1	0.45109	-0.2512	3.06511	0.00285554	0.070443	-1.71418	2.98288	0.0446989
CKMT2-AS1	0.14389	6.98098	3.3912	0.00285729	0.070443	-1.17736	2.98269	0.0446989
NUP107	0.174933	5.4483	3.52171	0.00286566	0.070443	-0.704311	2.98179	0.0446989
ZNF85	0.258393	1.57948	3.06341	0.00287029	0.070443	-1.74456	2.9813	0.0446989
RNH1	0.240496	5.30879	3.62495	0.00287066	0.070443	-0.353826	2.98126	0.0446989
ASCC3	-0.148115	7.09602	-3.28614	0.00287615	0.070443	-1.43761	-2.98067	0.0446989
AL031963.3	0.398739	0.345793	3.06266	0.0028768	0.070443	-1.70324	2.98061	0.0446989
AC010680.1	-0.343543	1.03354	-3.47918	0.00287986	0.070443	-0.603766	-2.98028	0.0446989
RAB23	-0.20748	2.56888	-3.05934	0.00290587	0.0708558	-1.87514	-2.97752	0.0449608
ZNF184	-0.379451	2.24012	-3.26653	0.00290853	0.0708558	-1.20284	-2.97724	0.0449608
PRKD3	-0.133702	6.65381	-3.46693	0.00290854	0.0708558	-0.879638	-2.97724	0.0449608
ACVR1C	-0.338819	0.478322	-3.05736	0.00292331	0.0710841	-1.72909	-2.97569	0.0451056
ABCC5-AS1	0.359494	3.61668	3.34256	0.00292581	0.0710841	-1.01926	2.97543	0.0451056
COBL	-0.228028	7.47315	-3.26816	0.00293053	0.0711028	-1.51647	-2.97493	0.0451175
AC080013.1	-0.389246	-0.338199	-3.05475	0.00294651	0.0713583	-1.72235	-2.97326	0.0452797
ZBTB5	-0.130145	3.0177	-3.05368	0.00295601	0.0713583	-1.95162	-2.97228	0.0452797
GLE1	0.152997	5.06303	3.88757	0.00295848	0.0713583	0.401432	2.97202	0.0452797
ABHD15-AS1	0.273265	4.66827	3.13804	0.00296048	0.0713583	-1.59186	2.97181	0.0452797
CNKSR2	-0.230312	7.69432	-3.09964	0.00296088	0.0713583	-1.87864	-2.97177	0.0452797
ATP2A1	0.32973	5.19336	3.427	0.00297126	0.0714762	-0.888209	2.9707	0.0453544
AKR1E2	0.396698	3.12191	3.36635	0.00297371	0.0714762	-0.937964	2.97044	0.0453544
ZNF189	-0.245302	3.55856	-3.17941	0.00298589	0.0716481	-1.44037	-2.96919	0.0454635
ZNF784	0.289265	1.3774	3.05003	0.00298882	0.0716481	-1.75627	2.96889	0.0454635
TMTC3	-0.186024	5.39707	-3.56143	0.00299696	0.0717145	-0.71131	-2.96805	0.0455057
GDF11	-0.187209	4.7914	-3.46706	0.00299956	0.0717145	-0.803658	-2.96778	0.0455057
DCP2	-0.159813	6.7458	-3.06865	0.00302181	0.0721508	-1.87226	-2.96551	0.0457825
AP005131.5	0.3975	4.94091	3.12765	0.00303042	0.0722603	-1.64749	2.96464	0.045852
SMC6	-0.161182	5.52395	-3.73341	0.00304899	0.0723813	-0.224638	-2.96276	0.0459288
IMPA1	-0.167403	3.74939	-3.0434	0.00304921	0.0723813	-2.05971	-2.96273	0.0459288
OSGEPL1	0.17785	4.44752	3.41605	0.00305321	0.0723813	-0.895213	2.96233	0.0459288
XPNPEP3	0.162682	5.8205	3.59464	0.00305588	0.0723813	-0.560699	2.96206	0.0459288
MYO10	-0.499779	5.5883	-3.66465	0.00305819	0.0723813	-0.452369	-2.96183	0.0459288
FNTA	0.0960941	6.62634	3.04209	0.00306124	0.0723813	-2.37128	2.96152	0.0459288
AL662844.4	0.490821	1.06608	3.53076	0.00306363	0.0723813	-0.454401	2.96128	0.0459288
LINC02796	-0.439271	2.90454	-3.2596	0.00307754	0.0726146	-1.21004	-2.95988	0.0460768
TGFB1	0.242898	4.79657	3.41035	0.00308514	0.0726963	-0.992888	2.95913	0.0461287
GUCY1A1	0.907109	2.0907	3.36432	0.00308908	0.0726963	-0.92759	2.95873	0.0461287
AC005291.2	0.453181	1.93552	3.09136	0.00311236	0.0731485	-1.68276	2.95642	0.0464156
NEBL	0.351181	8.66248	3.16848	0.00312515	0.0733533	-1.80766	2.95515	0.0465456
KANK3	0.504049	1.30679	3.26887	0.00313865	0.0735605	-1.19869	2.95382	0.046677
AP005131.3	0.496649	3.3747	3.0528	0.00314352	0.0735605	-1.73882	2.95334	0.046677
WDR62	0.169067	6.72114	3.07532	0.00314691	0.0735605	-1.87521	2.95301	0.046677
PPP1R15B	-0.407193	2.40488	-3.29879	0.00315032	0.0735605	-1.1071	-2.95268	0.046677
UAP1L1	0.575395	0.13584	3.03131	0.00316228	0.0736719	-1.78426	2.95151	0.0467477
AL158055.1	-0.464411	2.50278	-3.36244	0.0031644	0.0736719	-0.934534	-2.9513	0.0467477
AC023644.1	0.348531	3.70987	3.03528	0.00316737	0.0736719	-1.78509	2.95101	0.0467477
KIF3C	0.414645	2.87419	3.15984	0.00317995	0.0738261	-1.46778	2.94979	0.0468456
AC021755.2	0.370968	0.914682	3.02922	0.0031822	0.0738261	-1.7911	2.94957	0.0468456
RBMS3	-0.328457	2.84959	-3.44277	0.00318781	0.0738613	-0.73423	-2.94902	0.0468679
CXCL17	0.291027	4.0188	3.19217	0.00320049	0.0739922	-1.43344	2.9478	0.0469509
SLC13A2	-0.344251	2.59283	-3.02719	0.00320168	0.0739922	-2.00308	-2.94768	0.0469509
IFT27	0.131926	4.43546	3.02648	0.00320848	0.0740543	-2.16377	2.94702	0.0469903
AC010175.1	-0.279067	0.824609	-3.02466	0.00322615	0.0742651	-1.82154	-2.94533	0.0471241
NEURL2	0.223987	3.04165	3.41447	0.00322913	0.0742651	-0.813063	2.94504	0.0471241
CEACAM1	0.296837	4.8386	3.18686	0.00323	0.0742651	-1.50025	2.94496	0.0471241
PCLO	-0.174051	8.98829	-3.11366	0.00323599	0.074308	-1.95255	-2.94438	0.0471514
SMURF2	0.146348	7.12814	3.06512	0.00325149	0.0744764	-1.92084	2.9429	0.0472582
AL358115.1	0.235262	2.77386	3.02204	0.00325159	0.0744764	-1.94629	2.94289	0.0472582
XRCC4	0.305109	4.33434	3.11971	0.00326441	0.0746748	-1.62011	2.94168	0.0473841
CCS	0.310632	4.83709	3.35577	0.00328216	0.0749858	-1.15984	2.94	0.0475814
AC087501.1	0.435504	2.24383	3.09474	0.00329289	0.0751355	-1.65115	2.93898	0.0476764
AC020913.1	0.345577	6.0098	3.35057	0.0032998	0.0751978	-1.12799	2.93834	0.047716
FAM138D	0.507375	3.21848	3.32225	0.0033232	0.0756354	-1.14356	2.93614	0.0479936
UPK3BL1	0.313099	3.23896	3.01113	0.00335967	0.0761557	-2.0237	2.93276	0.0483238
MPZL1	-0.152976	4.49459	-3.01086	0.00336242	0.0761557	-2.2485	-2.9325	0.0483238
ACKR4	0.371792	2.61089	3.01171	0.00336257	0.0761557	-1.85117	2.93249	0.0483238
GRK5	-0.483033	1.07137	-3.6619	0.00336298	0.0761557	-0.075023	-2.93245	0.0483238
AC016596.1	0.526796	-0.222047	3.00997	0.00337138	0.0762015	-1.84597	2.93168	0.0483528
LYVE1	0.30774	5.41618	3.00956	0.00337548	0.0762015	-2.30706	2.9313	0.0483528
AL078587.1	-0.632336	0.0447559	-3.38978	0.00338146	0.0762015	-1.02739	-2.93075	0.0483528
HDGFL3	-0.147031	6.8806	-3.08463	0.00338194	0.0762015	-1.88926	-2.93071	0.0483528
MINPP1	-0.211797	3.88894	-3.58571	0.00339032	0.0762949	-0.458405	-2.92994	0.0484121
PRPF31	0.263957	4.22556	3.16127	0.003406	0.0765521	-1.51655	2.9285	0.0485753
RERGL	0.526995	2.6511	3.00571	0.00341467	0.0766041	-2.04284	2.92771	0.0486083
AC073593.2	0.237852	5.23568	3.25161	0.00341682	0.0766041	-1.4464	2.92752	0.0486083
SYT11	0.414607	2.95398	3.11085	0.00342253	0.0766365	-1.59355	2.927	0.0486288
ARHGEF35	-0.402887	2.19469	-3.62162	0.00342908	0.0766532	-0.200164	-2.9264	0.0486395
ZNF563	0.227412	2.2802	3.00378	0.00343435	0.0766532	-1.94192	2.92592	0.0486395
MMP16	1.53851	0.0762858	3.11438	0.00343605	0.0766532	-1.84643	2.92577	0.0486395
BLVRB	0.830709	1.58888	3.10184	0.00345372	0.0769522	-1.66077	2.92417	0.0488292
ENTPD3	0.465697	3.03815	3.25214	0.00346805	0.0771419	-1.23251	2.92288	0.0489496
EXOSC1	0.194337	5.0803	3.39562	0.00347081	0.0771419	-0.957448	2.92264	0.0489496
CDK11A	0.342316	4.80897	3.04416	0.00347964	0.0772428	-1.82627	2.92185	0.0490136
LINC00960	0.26175	5.63864	3.22732	0.00348678	0.0773061	-1.50929	2.92121	0.0490537
ODF2L	-0.105314	7.3962	-3.33574	0.00349866	0.077474	-1.43409	-2.92015	0.0491603
LINC00599	0.170107	9.48788	3.17155	0.00351211	0.0776763	-1.85463	2.91895	0.0492887
ZDHHC3	-0.147582	3.80028	-2.99456	0.00353025	0.077898	-2.19519	-2.91735	0.0494294
AC018695.2	0.216165	4.94644	3.28933	0.00353411	0.077898	-1.38589	2.917	0.0494294
PLAGL2	-0.212173	4.38522	-3.06389	0.00353512	0.077898	-1.75397	-2.91692	0.0494294
YBEY	0.183377	4.12813	3.48053	0.00354918	0.078027	-0.808234	2.91568	0.0495112
C2orf74	0.249131	4.15931	3.34662	0.00355184	0.078027	-1.0827	2.91544	0.0495112
PIGM	-0.337183	3.05333	-3.03174	0.00355397	0.078027	-1.78928	-2.91526	0.0495112
TPP2	-0.183102	6.30131	-3.16873	0.00356625	0.0780872	-1.66081	-2.91418	0.0495494
AC020661.2	0.327562	2.64179	3.24459	0.00356915	0.0780872	-1.2541	2.91393	0.0495494
FERMT1	-0.425377	-0.302779	-2.99083	0.00356972	0.0780872	-1.87872	-2.91388	0.0495494
LINC00486	0.558845	4.63325	3.21252	0.00357456	0.078098	-1.4111	2.91345	0.0495563
UBP1	-0.0909149	5.41162	-2.98868	0.00359265	0.0783104	-2.4163	-2.91188	0.049691
CCDC144NL	0.584268	2.69602	3.04088	0.00359298	0.0783104	-1.76805	2.91185	0.049691
SLC25A32	-0.180432	4.1193	-2.98779	0.00360223	0.0784171	-2.27654	-2.91104	0.0497587
AL033380.1	-0.364773	1.95339	-3.28859	0.00361434	0.0785857	-1.13096	-2.91	0.0498657
NDUFA10	-0.123401	6.76401	-3.29701	0.00361948	0.0786026	-1.48527	-2.90955	0.0498764
NUS1	-0.152726	4.82711	-3.39112	0.00362675	0.0786456	-1.03726	-2.90892	0.0499037
AC006230.1	-0.70079	1.18912	-3.68023	0.00363264	0.0786456	-0.0259925	-2.90842	0.0499037
HMGCL	0.150354	4.42024	2.98459	0.00363669	0.0786456	-2.27588	2.90807	0.0499037
LRP6	-0.157125	5.97024	-3.28681	0.00363894	0.0786456	-1.40538	-2.90787	0.0499037
ADI1	0.287998	2.91852	3.3317	0.00365147	0.0788218	-1.09235	2.9068	0.0500155
AC079950.1	-0.610775	2.62645	-3.20784	0.00366492	0.0789791	-1.34993	-2.90565	0.0501153
AL137779.1	0.343368	1.64753	3.14929	0.00366936	0.0789791	-1.5233	2.90527	0.0501153
AC018643.1	0.618855	1.3627	3.0512	0.00367192	0.0789791	-1.81252	2.90505	0.0501153
AL603840.1	0.669052	-0.171973	3.26568	0.00367756	0.079006	-1.44616	2.90457	0.0501324
AL391152.1	0.404555	2.59314	2.9802	0.00368453	0.0790615	-2.02934	2.90398	0.0501676
AATK	0.238523	5.06319	3.05946	0.00370518	0.07941	-1.81688	2.90223	0.0503887
HSP90B1	-0.348688	4.91419	-3.25833	0.00371789	0.0795183	-1.34562	-2.90116	0.0504574
AC008569.2	0.312102	0.160878	2.97706	0.00371907	0.0795183	-1.91199	2.90106	0.0504574
CARMIL1	-0.818897	3.95737	-2.97648	0.00372551	0.0795615	-2.36772	-2.90051	0.0504849
TOP1MT	0.33537	1.51304	2.97542	0.00373718	0.0797161	-1.95779	2.89953	0.050583
SH2D4A	0.296967	4.65584	3.19473	0.00374786	0.0798025	-1.47591	2.89864	0.0506378
ZNF565	0.198887	6.11219	3.15614	0.00375009	0.0798025	-1.74353	2.89845	0.0506378
AC128687.3	0.299983	2.74804	3.12959	0.00375493	0.0798111	-1.54545	2.89805	0.0506433
HYOU1	-0.240034	2.33473	-2.97301	0.00376408	0.0799113	-2.08906	-2.89728	0.0507069
AC104781.2	0.307034	4.69155	3.06098	0.00377187	0.0799824	-1.78596	2.89664	0.0507519
RIF1	-0.108969	5.91034	-2.97136	0.00378254	0.0800666	-2.52657	-2.89575	0.0508054
AL160314.2	0.252732	3.3315	2.97087	0.0037881	0.0800666	-2.16088	2.89529	0.0508054
OTUD4	-0.122991	5.84282	-3.37237	0.00378919	0.0800666	-1.18979	-2.8952	0.0508054
EXOSC3	0.127804	4.63971	3.61392	0.00379508	0.0800972	-0.448129	2.89471	0.0508248
UCP3	-0.35016	1.24641	-3.39365	0.00381056	0.0803297	-0.843565	-2.89343	0.0509723
RND3	0.614607	3.9046	3.25517	0.00384417	0.0809434	-1.39864	2.89067	0.0513617
TMEM42	0.360041	2.55531	3.14885	0.00384922	0.0809549	-1.49518	2.89026	0.0513691
AC007014.1	0.290212	5.43542	3.00646	0.00385524	0.080987	-1.97403	2.88977	0.0513894
AC009974.2	0.34701	3.26005	3.07057	0.00386908	0.081009	-1.70187	2.88864	0.0514034
UBE2QL1	-0.231913	4.81559	-2.96316	0.00387562	0.081009	-2.43472	-2.88811	0.0514034
AC044810.2	-1.16297	6.96982	-3.03108	0.00388175	0.081009	-2.02286	-2.88761	0.0514034
FAM182B	0.272977	5.24325	3.05033	0.00388198	0.081009	-1.87011	2.8876	0.0514034
WASF3	-0.121502	7.41452	-3.54557	0.00388278	0.081009	-0.832037	-2.88753	0.0514034
NEDD1	-0.143572	3.51086	-2.96224	0.00388623	0.081009	-2.25692	-2.88725	0.0514034
PPP4R1	-0.118571	5.32696	-3.29262	0.00388778	0.081009	-1.39609	-2.88713	0.0514034
ELAVL2	0.6285	1.80171	3.11878	0.00389686	0.0810346	-1.60161	2.88639	0.0514196
ME2	-0.133439	7.03572	-3.32157	0.00389801	0.0810346	-1.39599	-2.8863	0.0514196
CCDC50	-0.174863	5.22589	-3.1655	0.00391339	0.0812604	-1.66148	-2.88506	0.0515629
AL139021.1	0.284519	5.66059	3.0528	0.00391957	0.0812773	-1.90821	2.88456	0.0515736
TMLHE	-0.188868	5.01924	-3.70844	0.00392323	0.0812773	-0.0981073	-2.88427	0.0515736
AL136456.1	-0.521385	1.65336	-3.21377	0.00394263	0.0814667	-1.38052	-2.88272	0.0516938
SLC66A3	-0.517995	1.79816	-2.979	0.00394625	0.0814667	-1.97683	-2.88243	0.0516938
BAG3	0.980581	-0.57012	2.99777	0.00394958	0.0814667	-2.31297	2.88216	0.0516938
AL591368.1	0.319219	3.92216	3.47893	0.00395048	0.0814667	-0.708971	2.88209	0.0516938
TAB2	-0.162185	5.91144	-3.14388	0.00396715	0.0817106	-1.77035	-2.88076	0.0518486
EAPP	0.153937	5.35736	3.14007	0.00397276	0.0817106	-1.67011	2.88032	0.0518486
AL157392.1	-0.528106	-0.41763	-3.37839	0.00397592	0.0817106	-0.944874	-2.88007	0.0518486
AC073343.2	0.293108	4.42955	3.0118	0.00401475	0.082379	-1.89442	2.877	0.0522727
RDH13	0.225715	4.48916	3.17268	0.00401759	0.082379	-1.53756	2.87678	0.0522727
FBXL19-AS1	-0.395532	-0.160619	-2.94971	0.00403291	0.082599	-1.98025	-2.87558	0.0524123
CHODL	-0.415752	3.74271	-3.43387	0.00404748	0.082752	-0.946175	-2.87444	0.0525094
DZIP1	-0.577227	2.58081	-3.75076	0.00404958	0.082752	0.14013	-2.87427	0.0525094
AC104170.1	0.440453	2.80388	3.22278	0.00406498	0.0827798	-1.3311	2.87307	0.052527
DRC7	0.609439	0.702668	3.05641	0.00406605	0.0827798	-1.88169	2.87299	0.052527
IQCH	0.140013	6.74231	2.99702	0.0040676	0.0827798	-2.09372	2.87287	0.052527
CLCF1	0.396094	1.99458	3.3548	0.00407073	0.0827798	-0.949239	2.87263	0.052527
PEX5L-AS2	0.439537	5.97969	2.94812	0.00407393	0.0827798	-2.1312	2.87238	0.052527
NDST1	-0.1943	4.44823	-3.1181	0.00408221	0.0828546	-1.67333	-2.87174	0.0525745
AHNAK2	0.985809	0.877473	3.17502	0.00409635	0.0829505	-1.4486	2.87065	0.0526353
ADAMTS18	0.413173	5.46204	2.96397	0.00409884	0.0829505	-2.06615	2.87045	0.0526353
TAS2R30	-0.276227	0.397962	-2.94405	0.00410076	0.0829505	-2.00658	-2.87031	0.0526353
STAM2	-0.13407	4.91022	-2.94203	0.00412529	0.0833531	-2.48385	-2.86842	0.0528908
ZNF226	0.130769	4.99466	3.36378	0.00413679	0.0834387	-1.18446	2.86754	0.0529451
USP47	-0.121855	6.75917	-3.11124	0.0041388	0.0834387	-1.90219	-2.86738	0.0529451
FLVCR1-DT	0.268184	3.34556	3.18019	0.004149	0.0835036	-1.46866	2.86661	0.0529863
FAM3D-AS1	0.281815	5.55543	2.97381	0.00415183	0.0835036	-2.05313	2.86639	0.0529863
ATG13	0.152852	6.15186	3.20006	0.00415593	0.0835036	-1.65873	2.86608	0.0529863
PDGFA	0.328771	3.12047	3.3957	0.00416211	0.0835345	-0.918777	2.86561	0.0530059
ATP6V0A4	-0.387492	0.479925	-2.93822	0.00417185	0.0836368	-2.03165	-2.86487	0.0530708
AC025262.1	0.296839	3.38577	3.11638	0.00419293	0.083966	-1.6139	2.86327	0.0532797
SPDYE16	0.350096	4.6369	3.193	0.00420425	0.0840582	-1.51441	2.86242	0.0533382
IZUMO4	0.224255	3.08294	2.9353	0.00420785	0.0840582	-2.2409	2.86214	0.0533382
SLC16A3	0.341232	3.9508	3.00965	0.00421155	0.0840582	-1.87344	2.86187	0.0533382
NREP	-0.160657	6.6855	-3.47837	0.00423045	0.0843421	-0.98651	-2.86045	0.0535183
TFR2	0.295421	1.97333	2.93122	0.00425871	0.0848115	-2.10746	2.85833	0.0538162
MTHFS	-0.165658	4.60944	-2.92824	0.00429613	0.0854622	-2.4848	-2.85556	0.0542291
SRSF5	0.180109	7.45735	3.43472	0.00431932	0.0858287	-1.25803	2.85385	0.0544617
TAS2R14	-0.19632	2.22914	-2.92443	0.0043445	0.0862339	-2.19988	-2.852	0.0547188
AC011447.3	0.502434	1.11326	3.21148	0.00435087	0.0862651	-1.33064	2.85153	0.0547386
RAB39A	-0.437581	1.58285	-4.00517	0.00436962	0.0864891	0.985475	-2.85017	0.0548807
COL5A2	0.611447	1.4241	2.92196	0.00437609	0.0864891	-2.09124	2.8497	0.0548807
SNRPN	0.376575	6.14436	3.17958	0.00437963	0.0864891	-1.72466	2.84944	0.0548807
SLC25A24	-0.192734	5.66621	-3.13511	0.00438138	0.0864891	-1.80652	-2.84931	0.0548807
ZNF417	0.104898	4.34826	2.92061	0.00439354	0.086634	-2.4551	2.84843	0.0549727
CD4	0.709985	2.33015	3.26951	0.0044018	0.0866539	-1.19933	2.84783	0.0549853
AL513217.1	-0.346856	0.154502	-2.91974	0.00440471	0.0866539	-2.0575	-2.84762	0.0549853
AC093249.6	0.490299	2.29534	3.21821	0.00440899	0.0866539	-1.31497	2.84731	0.0549853
AMDHD2	0.186074	2.40323	2.91887	0.00441595	0.086696	-2.19719	2.84681	0.055012
NAA60	0.182785	3.23236	3.34166	0.00442364	0.0867526	-1.01675	2.84626	0.0550479
TIPIN	0.199119	3.90158	3.14068	0.00443495	0.0868797	-1.61306	2.84544	0.0551286
AC016642.1	0.562422	1.92386	2.92253	0.00446922	0.0874559	-2.08602	2.84299	0.0554942
RHOF	0.237697	2.7806	3.23432	0.00447608	0.0874949	-1.32574	2.8425	0.055519
CELF2-AS2	0.342728	5.31635	2.9214	0.00448927	0.0875586	-2.15772	2.84157	0.0555594
FANCL	-0.13128	5.72491	-3.28625	0.0044925	0.0875586	-1.497	-2.84134	0.0555594
AC011379.1	-0.309566	0.520335	-2.9129	0.00449393	0.0875586	-2.08356	-2.84123	0.0555594
SMLR1	-0.669893	-0.352033	-2.93413	0.00450508	0.0876811	-2.34274	-2.84044	0.0556371
PCP4	0.598895	6.29273	3.02901	0.00451316	0.0877435	-2.03378	2.83987	0.0556767
GABBR2	0.602037	3.37382	2.90995	0.00453292	0.0879492	-2.37408	2.83848	0.0558072
WDHD1	0.169845	3.70835	3.54397	0.00453619	0.0879492	-0.566602	2.83825	0.0558072
AL136084.2	0.733617	-0.0953222	2.90953	0.0045384	0.0879492	-2.07399	2.83809	0.0558072
AL157388.1	0.254639	4.78057	3.10394	0.00454761	0.088033	-1.73963	2.83745	0.0558604
MYH7B	0.221291	3.60697	3.39819	0.00455769	0.0881062	-0.970389	2.83674	0.0559068
AC011468.1	-0.29858	0.0609003	-2.90757	0.00456446	0.0881062	-2.08355	-2.83627	0.0559068
AC093690.1	0.288297	3.59446	3.02207	0.00456608	0.0881062	-1.84258	2.83615	0.0559068
AL355001.1	0.331958	2.93882	3.0402	0.00457284	0.0881422	-1.7746	2.83568	0.0559297
GPR89A	-0.156214	4.11503	-2.90607	0.00458455	0.0882733	-2.46955	-2.83486	0.0560129
AC004158.1	0.488505	1.67995	3.05597	0.00462591	0.0889747	-1.75574	2.83199	0.0564579
FBXL8	0.573203	1.54421	2.96677	0.00463171	0.0889911	-1.98122	2.83159	0.0564683
TTC21B	-0.127605	5.88277	-3.08931	0.00463992	0.0890144	-1.93846	-2.83102	0.0564831
AC011092.2	0.2803	5.78092	2.96218	0.00464281	0.0890144	-2.12329	2.83083	0.0564831
AC087854.1	0.310977	7.31962	2.9311	0.0046619	0.0892852	-2.27886	2.82951	0.056655
AL139383.1	0.2861	2.04297	2.89898	0.0046805	0.0895129	-2.18966	2.82824	0.0567994
AC016773.1	0.456377	0.284625	3.28015	0.00468552	0.0895129	-1.17239	2.82789	0.0567994
USP25	-0.156178	5.65316	-3.10095	0.0046887	0.0895129	-1.86784	-2.82768	0.0567994
CDKL2	-0.12924	4.8471	-3.61566	0.00469993	0.0896323	-0.528367	-2.82691	0.0568752
HIVEP3	-0.352924	3.60202	-2.89677	0.00471075	0.0897403	-2.45971	-2.82617	0.0569437
AC051619.6	0.352326	2.22463	3.35946	0.00471556	0.0897403	-0.938771	2.82585	0.0569437
LINC00174	0.196479	5.27707	3.0839	0.00473367	0.0899212	-1.81988	2.82462	0.0570585
C19orf54	0.310965	1.69847	2.89501	0.00473506	0.0899212	-2.15681	2.82453	0.0570585
SNRK	-0.132049	5.4559	-3.15905	0.00474651	0.0900409	-1.71864	-2.82375	0.0571345
GMPPB	0.343282	1.52734	3.2751	0.00475137	0.0900409	-1.16105	2.82342	0.0571345
AC245060.5	-0.471475	4.14345	-3.13696	0.0047663	0.0902288	-1.64654	-2.82242	0.0572537
ENTR1	0.297282	3.5075	2.91895	0.00477509	0.0903004	-2.07067	2.82183	0.0572991
HEXA	0.37851	7.23003	2.99875	0.00478662	0.0904235	-2.16404	2.82105	0.0573772
AC125613.1	0.467807	2.98108	2.98118	0.00479817	0.0904798	-1.91261	2.82028	0.057413
AC003035.2	0.43869	1.80646	3.19292	0.00479966	0.0904798	-1.38153	2.82018	0.057413
SEC24B-AS1	0.344606	1.10739	2.88966	0.0048095	0.0905622	-2.15154	2.81952	0.0574653
SCRT1	0.365059	2.14989	2.88933	0.00481409	0.0905622	-2.23671	2.81922	0.0574653
LNP1	0.154	6.37974	2.88852	0.00482545	0.0906812	-2.74676	2.81846	0.0575408
UBE2F	-0.12295	4.60628	-2.88767	0.00483734	0.0908097	-2.57908	-2.81767	0.0576223
MOB1B	-0.172783	5.58515	-3.41248	0.00485969	0.0911344	-1.23302	-2.81619	0.0578283
RNASEH1-AS1	0.225473	2.69815	2.88439	0.00488375	0.0914902	-2.30449	2.8146	0.0580541
BRD3OS	-0.388372	2.22848	-2.9125	0.00489894	0.0916794	-2.09129	-2.8136	0.0581742
PTPRG-AS1	0.179272	4.45569	3.49295	0.00492783	0.0920799	-0.756461	2.81171	0.0584283
NDST1-AS1	0.269898	1.84091	2.88111	0.00493057	0.0920799	-2.1987	2.81154	0.0584283
ZEB1	-0.125932	8.81827	-3.0062	0.00497145	0.0927473	-2.29305	-2.80888	0.0588518
PIP4P2	-0.269651	3.56813	-2.87733	0.00498507	0.0929049	-2.50845	-2.808	0.0589518
DLAT	-0.123658	5.10335	-3.37458	0.00499642	0.0929744	-1.22402	-2.80726	0.0589959
OBI1-AS1	-0.713346	1.91836	-2.96759	0.00499912	0.0929744	-1.95539	-2.80709	0.0589959
NBEA	-0.172105	9.99523	-3.02201	0.00501504	0.0931697	-2.3208	-2.80607	0.0591198
ARL16	0.243223	3.66148	3.12823	0.00503165	0.0931697	-1.64711	2.805	0.0591198
ZNF333	0.153185	4.24401	3.13545	0.00503621	0.0931697	-1.65061	2.80471	0.0591198
LAS1L	0.241826	4.79761	2.88309	0.00503986	0.0931697	-2.21824	2.80448	0.0591198
CALB1	-0.642722	4.48399	-2.91883	0.0050432	0.0931697	-2.13307	-2.80426	0.0591198
ZNF555	-0.261013	3.33969	-2.90743	0.00504377	0.0931697	-2.09253	-2.80423	0.0591198
AC005476.2	0.522903	1.18318	3.0779	0.00504585	0.0931697	-1.67165	2.80409	0.0591198
RHCE	0.363889	3.31678	3.22306	0.00505884	0.0933138	-1.39411	2.80326	0.0592113
VWA3B	0.488059	5.89925	3.00617	0.00506826	0.0933919	-2.05531	2.80266	0.0592608
AAR2	-0.243833	3.40721	-3.37055	0.00510166	0.0939112	-0.960502	-2.80054	0.0595904
RNFT2	0.201937	5.05802	2.90065	0.00512101	0.0941711	-2.20618	2.79932	0.0597552
EWSR1	-0.134728	5.68075	-3.06426	0.00513049	0.0942131	-1.97695	-2.79872	0.0597819
ERCC5	-0.126367	5.03323	-3.27389	0.00513376	0.0942131	-1.4373	-2.79852	0.0597819
AC010967.1	-0.506779	-0.37391	-2.86611	0.0051498	0.094395	-2.17473	-2.79751	0.0598973
ABHD12B	-0.32372	3.113	-3.46676	0.00515416	0.094395	-0.71483	-2.79724	0.0598973
NEFH	1.13671	0.744873	3.07552	0.00517279	0.09464	-1.7263	2.79607	0.0600528
ANXA5	-0.150487	5.35284	-3.20024	0.00518549	0.0947761	-1.63661	-2.79528	0.0601391
BAG5	-0.303424	4.90662	-2.92872	0.00519275	0.0948125	-2.14525	-2.79483	0.0601622
C2CD3	-0.144772	6.23292	-3.04221	0.00521622	0.0951445	-2.09497	-2.79337	0.0603729
AC096576.2	-0.867257	-1.04814	-3.00298	0.00524292	0.0952353	-2.18975	-2.79172	0.0604305
TBCE.1	0.247687	4.31268	2.95952	0.00525752	0.0952353	-2.04528	2.79082	0.0604305
CCDC65	0.178507	5.75634	3.11676	0.00526656	0.0952353	-1.90707	2.79026	0.0604305
AQP9	0.694928	-0.746575	2.85814	0.00527001	0.0952353	-2.20627	2.79005	0.0604305
PIGF	0.119866	5.3442	2.85784	0.00527449	0.0952353	-2.71897	2.78977	0.0604305
SLC6A16	0.214218	4.23394	3.19917	0.00527601	0.0952353	-1.58095	2.78968	0.0604305
GALNT1	-0.148079	6.06967	-2.96539	0.00527747	0.0952353	-2.19864	-2.78959	0.0604305
AC023282.1	0.35886	3.14355	2.9002	0.00528115	0.0952353	-2.10704	2.78936	0.0604305
CDS1	-0.169924	4.61314	-3.15053	0.00528454	0.0952353	-1.69463	-2.78916	0.0604305
AL390719.3	0.273835	2.25824	3.13231	0.00528539	0.0952353	-1.55327	2.78911	0.0604305
DDX51	0.263481	3.09884	2.89943	0.00528895	0.0952353	-2.1077	2.78889	0.0604305
SLC30A6	0.122173	5.05427	3.08811	0.00529084	0.0952353	-1.87995	2.78877	0.0604305
EFCAB2	0.357415	6.57122	3.31218	0.00529207	0.0952353	-1.47313	2.7887	0.0604305
AC027020.2	-0.391884	0.626044	-2.85648	0.00529526	0.0952353	-2.24999	-2.7885	0.0604305
TMTC2	-0.349942	6.57417	-3.37263	0.00530373	0.0952394	-1.33429	-2.78798	0.0604331
IFT20	0.174926	5.83471	3.29774	0.00530875	0.0952394	-1.48023	2.78768	0.0604331
LRRD1	-0.246338	1.31546	-2.85543	0.00531136	0.0952394	-2.28047	-2.78752	0.0604331
CERKL	-0.156133	6.81918	-3.14385	0.00532871	0.0954554	-1.85772	-2.78646	0.0605702
TMEM213	0.348754	1.3399	2.85374	0.00533744	0.0954872	-2.24438	2.78593	0.0605904
HNRNPUL2	-0.144566	3.98339	-2.8535	0.00534109	0.0954872	-2.61894	-2.78571	0.0605904
AC005520.5	0.284752	3.92255	3.03706	0.00536578	0.0958334	-1.85542	2.78421	0.06081
ISOC1	-0.313145	3.73545	-2.93812	0.0053711	0.0958335	-2.04824	-2.78389	0.0608101
LYPLAL1-AS1	-0.725711	-0.389788	-3.21443	0.00538044	0.095905	-1.51761	-2.78333	0.0608555
TOMM40L	-0.376558	2.2072	-2.90773	0.00540916	0.0962165	-2.09271	-2.7816	0.0610531
ATP6V0E2	-0.2772	5.43374	-2.86738	0.00541075	0.0962165	-2.30392	-2.78151	0.0610531
THY1	1.13419	1.70326	2.98617	0.00541395	0.0962165	-1.90816	2.78131	0.0610531
BHMT	0.414674	0.219093	2.84831	0.00542163	0.0962579	-2.21586	2.78085	0.0610794
COMTD1	-0.390946	2.6354	-2.8731	0.00543922	0.0963603	-2.16682	-2.7798	0.0611444
THAP8	0.258388	3.15271	3.20697	0.00543982	0.0963603	-1.40895	2.77977	0.0611444
UNG	0.191512	2.29218	2.84692	0.00544345	0.0963603	-2.36314	2.77955	0.0611444
PTPN7	0.39332	0.0394758	2.84487	0.00547569	0.0968358	-2.22344	2.77763	0.0614461
AL049840.2	0.280845	4.31644	2.86899	0.0054854	0.0969124	-2.23326	2.77705	0.0614947
ZNF697	-0.46299	-0.0365417	-3.41229	0.00551087	0.0972668	-0.804275	-2.77555	0.0617196
TIMM9	0.0912546	5.35563	2.84121	0.0055337	0.0975741	-2.7809	2.7742	0.0619146
BRI3	0.150565	5.44204	3.06401	0.00555208	0.0978025	-1.96359	2.77312	0.0620595
MTMR10	-0.143513	5.38665	-3.15786	0.0055604	0.0978533	-1.93827	-2.77264	0.0620917
USP12	-0.122359	7.10911	-3.15535	0.00556646	0.0978643	-2.00432	-2.77228	0.0620987
TTN-AS1	-0.160692	6.49609	-3.04504	0.00557635	0.0979424	-2.10016	-2.77171	0.0621483
FAM106A	-0.460252	5.46361	-2.91168	0.00558796	0.0979775	-2.2356	-2.77103	0.0621706
CIRBP	0.22128	7.5818	3.38388	0.00558923	0.0979775	-1.29386	2.77095	0.0621706
ADM5	-0.405257	1.68747	-3.22793	0.00559563	0.0979943	-1.29547	-2.77058	0.0621812
AC092747.1	0.538439	1.50016	2.8361	0.00561578	0.0982516	-2.28484	2.76941	0.0623445
NFIC	0.180533	6.58725	2.86419	0.0056229	0.0982806	-2.40954	2.769	0.0623629
AP001972.4	-0.350557	0.960394	-2.83484	0.0056361	0.0983188	-2.33341	-2.76823	0.0623871
PITPNA	0.259521	4.18757	2.85847	0.00564259	0.0983188	-2.24519	2.76786	0.0623871
GNB5	0.155207	8.94525	3.15181	0.00564551	0.0983188	-2.17311	2.76769	0.0623871
AC109811.1	0.549833	1.39516	2.83682	0.00564693	0.0983188	-2.31217	2.76761	0.0623871
SPDYE3	0.253018	5.60866	3.05215	0.00565633	0.0983729	-1.99038	2.76707	0.0624214
TCF4-AS2	0.40867	2.40818	2.84237	0.00566096	0.0983729	-2.24329	2.7668	0.0624214
SNX13	-0.138705	6.29692	-3.02171	0.0056705	0.0984434	-2.16801	-2.76625	0.0624662
FN3KRP	0.227941	3.89748	2.91221	0.00568657	0.0984434	-2.12547	2.76533	0.0624662
ARHGAP6	-0.298657	1.91584	-2.83159	0.00568893	0.0984434	-2.39957	-2.76519	0.0624662
PANX1	0.738247	0.350574	2.89519	0.00569376	0.0984434	-2.31076	2.76492	0.0624662
ZFAND4	-0.126372	4.80195	-2.83122	0.00569505	0.0984434	-2.76588	-2.76484	0.0624662
TRAP1	0.1343	5.11087	3.47369	0.00570325	0.0984434	-0.854009	2.76437	0.0624662
TENM3-AS1	-0.623485	-0.669015	-2.83071	0.0057033	0.0984434	-2.25517	-2.76437	0.0624662
TRMT10A	0.339093	2.38782	3.02345	0.00573033	0.0987729	-1.80726	2.76283	0.0626753
LENG9	0.701524	2.01611	2.89703	0.00573336	0.0987729	-2.11719	2.76265	0.0626753
AC009118.3	-0.228653	1.77965	-2.82851	0.00573947	0.0987836	-2.38679	-2.76231	0.062682
AC109129.1	-0.58292	-0.0127366	-3.42569	0.00575933	0.0990307	-0.760271	-2.76118	0.0628389
KCTD2	0.182555	4.05839	3.20792	0.0057778	0.0992535	-1.59699	2.76013	0.0629802
AC104964.4	-0.753315	1.06449	-3.22431	0.00579128	0.0993902	-1.30301	-2.75937	0.063067
C3orf38	-0.227498	4.66847	-2.83483	0.00582341	0.0996351	-2.32036	-2.75756	0.0632224
DUSP16	-0.218339	4.57581	-2.82341	0.00582402	0.0996351	-2.75513	-2.75753	0.0632224
PHRF1	0.204538	3.91858	2.88578	0.00582435	0.0996351	-2.18732	2.75751	0.0632224
FIGNL2	0.710257	1.51695	3.03753	0.00582768	0.0996351	-1.77117	2.75732	0.0632224
MIS18A	0.30524	1.97116	3.18934	0.00583659	0.0996682	-1.38876	2.75682	0.0632434
AC093496.1	-0.38512	3.88455	-3.22525	0.00584232	0.0996682	-1.39243	-2.7565	0.0632434
MYLK-AS1	-0.096702	4.95966	-2.82209	0.00584623	0.0996682	-2.81095	-2.75628	0.0632434
ELOA-AS1	0.147527	5.89564	2.89321	0.00586166	0.0996745	-2.32255	2.75542	0.0632474
STEAP3-AS1	0.351671	-0.34271	2.82106	0.00586349	0.0996745	-2.28051	2.75532	0.0632474
MRAS	-0.146174	3.96612	-2.82105	0.00586358	0.0996745	-2.67544	-2.75531	0.0632474
KCNN2	-0.354807	2.31894	-2.82075	0.00586874	0.0996745	-2.49854	-2.75503	0.0632474
FCRL5	0.734479	0.434462	3.02988	0.00588385	0.0998369	-1.86116	2.75418	0.0633504
AL512343.2	0.328706	1.38125	3.2277	0.00589862	0.0999933	-1.28909	2.75336	0.0634497
FZD4-DT	0.284462	3.44865	2.94141	0.0059059	0.100022	-2.05703	2.75296	0.0634682
FSIP2	0.281086	4.68982	2.81941	0.00591859	0.100143	-2.35938	2.75226	0.0635448
ID4	0.838423	0.63192	2.87377	0.00592746	0.100199	-2.26625	2.75177	0.0635802
STAT1	-0.26208	3.61377	-2.9532	0.00594108	0.100335	-2.02748	-2.75102	0.0636666
AC005699.1	-0.320396	2.83635	-2.81553	0.00595694	0.100509	-2.58738	-2.75014	0.0637767
VEGFB	0.321884	5.40431	3.25719	0.00596372	0.100529	-1.47376	2.74977	0.0637895
TRMT10B	0.217314	4.97515	2.95206	0.00597153	0.100566	-2.158	2.74934	0.0638133
AC018628.2	0.339397	3.91621	2.86297	0.00600467	0.10103	-2.23508	2.74753	0.0641075
HS3ST4	-0.825975	-0.623884	-3.51681	0.00601907	0.101129	-0.56845	-2.74674	0.0641705
N4BP1	-0.11864	5.76187	-2.87769	0.00602181	0.101129	-2.36836	-2.74659	0.0641705
HDAC9	-0.193525	7.96363	-3.0986	0.00603194	0.101146	-2.16995	-2.74604	0.0641809
TCEAL6	0.893837	0.784885	2.86284	0.00603896	0.101146	-2.27918	2.74566	0.0641809
UBE2E3	-0.154439	6.4245	-2.96505	0.00604093	0.101146	-2.233	-2.74555	0.0641809
CEBPZOS	0.152206	5.65163	2.92155	0.00604526	0.101146	-2.28087	2.74532	0.0641809
AC015849.4	0.355745	1.15823	3.08919	0.00605368	0.101166	-1.63963	2.74486	0.0641941
NPHS1	-0.693587	-0.711216	-3.31157	0.00605774	0.101166	-1.08557	-2.74464	0.0641941
PHYHD1	0.19594	6.31093	3.05965	0.00607731	0.101399	-2.01758	2.74358	0.0643418
LENG8-AS1	0.227429	4.37341	3.14591	0.0061115	0.101875	-1.67501	2.74174	0.0646439
SPDYE2	0.36562	5.28864	3.23145	0.00611719	0.101876	-1.64172	2.74143	0.0646442
SGMS1-AS1	0.28338	3.01212	3.52899	0.00613339	0.102051	-0.529237	2.74056	0.0647554
NIN	-0.147637	7.13041	-2.96212	0.00614576	0.102163	-2.31761	-2.7399	0.0648262
AC003092.1	0.688115	0.721753	3.03858	0.00618642	0.102744	-1.77754	2.73773	0.0651948
FAM8A1	-0.282409	3.49051	-2.9045	0.00620277	0.10292	-2.12111	-2.73686	0.065307
ZDHHC20	-0.129543	6.267	-2.99973	0.00622618	0.103117	-2.23627	-2.73563	0.0654315
NHEJ1	-0.253074	2.28406	-2.79979	0.00623096	0.103117	-2.50164	-2.73537	0.0654315
CFDP1	0.123344	7.34895	2.8277	0.00623179	0.103117	-2.55016	2.73533	0.0654315
NCK2	-0.187174	4.12253	-2.79937	0.00623838	0.103131	-2.75435	-2.73498	0.0654406
LINC01128	-0.167767	2.58133	-2.7969	0.00628249	0.103765	-2.56963	-2.73266	0.0658429
BRINP3	-0.535527	-0.824094	-2.79646	0.00629022	0.103797	-2.33263	-2.73226	0.0658635
AC124319.2	-0.290905	0.917043	-2.79599	0.00629875	0.103803	-2.40802	-2.73181	0.0658668
DNAJC15	-0.150251	4.96531	-3.10617	0.00630208	0.103803	-1.9463	-2.73164	0.0658668
PIH1D1	0.197868	4.32235	2.98691	0.00631419	0.103907	-2.05893	2.731	0.0659331
IGSF11	-0.14813	9.22419	-3.28053	0.00633576	0.104167	-1.8195	-2.72988	0.0660979
AL161616.2	-0.473107	4.84756	-3.03309	0.00634555	0.104233	-1.99316	-2.72937	0.0661397
AC010864.1	0.334083	0.809072	2.79229	0.00636537	0.104463	-2.36643	2.72834	0.0662857
CYB5R2	-0.916283	3.2666	-2.84767	0.00638553	0.104698	-2.23685	-2.7273	0.0664351
APTX	0.116134	5.78365	2.79079	0.00639265	0.10472	-2.946	2.72693	0.0664487
PPP3CB-AS1	0.282462	2.85498	2.94467	0.00641468	0.104975	-2.01344	2.72579	0.0666109
SDK2	0.824975	0.618128	2.95833	0.00641991	0.104975	-2.08131	2.72553	0.0666109
EPM2A	-0.253827	5.38537	-3.17383	0.00644604	0.105307	-1.82827	-2.72419	0.0668212
TBC1D20	0.180218	4.49973	2.85762	0.00646928	0.105587	-2.30039	2.723	0.066999
AC008892.1	0.422065	3.16638	2.81732	0.00647492	0.105587	-2.29834	2.72271	0.066999
AC015853.3	0.250562	4.14085	2.95844	0.00648273	0.105619	-2.07429	2.72231	0.0670192
CALCOCO1	0.221943	5.1327	2.80118	0.00649593	0.105738	-2.44764	2.72164	0.0670949
AC019186.1	-0.481556	0.466996	-3.02862	0.00652675	0.106144	-1.83938	-2.72007	0.0673523
SNX32	0.224418	2.12183	2.78258	0.00654359	0.106322	-2.46611	2.71922	0.0674652
RBM26	-0.0891655	7.13422	-3.09959	0.00658339	0.106818	-2.16136	-2.71721	0.0677802
AC026741.1	-0.280741	0.466649	-2.7803	0.00658601	0.106818	-2.40567	-2.71708	0.0677802
CMTM2	0.442928	1.85313	2.81948	0.0066136	0.107108	-2.30512	2.7157	0.0679642
SLC7A8	0.729673	0.438852	2.9014	0.00661579	0.107108	-2.21487	2.71559	0.0679642
AL031768.2	0.206278	4.41685	3.01923	0.0066387	0.107331	-2.02858	2.71444	0.068106
PARP12	-0.287573	3.52526	-3.1233	0.00664152	0.107331	-1.71898	-2.7143	0.068106
C16orf72	-0.181041	4.25539	-3.09055	0.00665644	0.107476	-1.8034	-2.71356	0.0681978
PRR22	0.407727	0.7692	2.77612	0.00666446	0.107509	-2.40376	2.71316	0.0682188
MYO1E	-0.458668	4.04392	-3.26625	0.00669308	0.107793	-1.45235	-2.71174	0.0683991
ULK2	0.182144	5.33428	2.88098	0.00669404	0.107793	-2.3367	2.71169	0.0683991
MCTS1	0.125115	5.11482	3.31602	0.00670223	0.107829	-1.40181	2.71129	0.0684215
ZNF852	0.173787	4.17148	3.04603	0.00673183	0.108208	-1.96927	2.70983	0.0686623
TPD52L2	0.170742	4.35318	3.10071	0.00674459	0.108316	-1.7276	2.7092	0.0687311
SMIM14	0.0808284	6.38057	2.77128	0.00675649	0.108411	-3.06406	2.70861	0.068791
MYOM1	-0.350523	4.63025	-3.0659	0.00676295	0.108418	-1.84133	-2.7083	0.0687955
ENSA	-0.201789	6.48228	-2.77598	0.00678582	0.108581	-2.59016	-2.70718	0.0688988
AL161716.1	-0.275216	8.24903	-2.92269	0.00679039	0.108581	-2.41566	-2.70695	0.0688988
AC034102.5	0.361006	3.58091	2.94911	0.00679314	0.108581	-2.02695	2.70682	0.0688988
P4HA3	0.28156	5.04525	2.82415	0.00680894	0.108581	-2.41907	2.70605	0.0688988
CSTF3-DT	0.323309	3.62777	3.10372	0.00681178	0.108581	-1.8235	2.70591	0.0688988
AC079140.6	0.227231	2.87162	2.76818	0.00681609	0.108581	-2.62626	2.7057	0.0688988
AL358472.5	0.277203	1.23756	3.0093	0.00681991	0.108581	-1.84087	2.70551	0.0688988
AC068633.1	-0.400197	2.94992	-3.70627	0.00682136	0.108581	0.0251196	-2.70544	0.0688988
MAGI2	-0.204579	10.007	-2.81813	0.00686482	0.109039	-2.7419	-2.70333	0.0691898
BNIP3	0.451251	5.43817	2.76548	0.00686833	0.109039	-2.95227	2.70316	0.0691898
ST3GAL3	0.296413	9.55952	2.86666	0.00686834	0.109039	-2.63168	2.70316	0.0691898
DXO	0.22768	2.39224	2.76487	0.00688021	0.109054	-2.571	2.70259	0.069199
HSF4	0.542194	1.89098	3.06327	0.00688137	0.109054	-1.72043	2.70253	0.069199
GATA1	0.442817	1.5675	2.87306	0.0069104	0.109352	-2.17839	2.70113	0.0693881
D2HGDH	0.247986	3.54664	3.11896	0.00691232	0.109352	-1.67782	2.70104	0.0693881
PLCL2	-0.159639	6.9411	-2.92457	0.00693279	0.109579	-2.43134	-2.70006	0.0695325
AC027288.3	0.323474	7.97306	2.79331	0.00695447	0.109743	-2.67236	2.69902	0.0696365
SAXO1	0.324036	1.7062	2.761	0.00695578	0.109743	-2.49521	2.69895	0.0696365
SEM1	-0.154367	6.10206	-3.10604	0.00696145	0.109743	-2.14946	-2.69868	0.0696365
AC023389.1	0.256892	4.57226	2.80954	0.00697465	0.109762	-2.41432	2.69805	0.0696484
AC106820.4	-0.288981	0.782639	-2.76003	0.00697484	0.109762	-2.46772	-2.69804	0.0696484
VPS13A	-0.149697	6.9359	-3.06791	0.00698363	0.109805	-2.12603	-2.69762	0.0696753
CAB39L	-0.159474	4.31673	-3.29587	0.0069956	0.109897	-1.41026	-2.69705	0.0697338
AC010542.4	0.43792	-0.377047	2.75863	0.00700248	0.109909	-2.41965	2.69673	0.0697416
RNF8	-0.150045	4.99591	-2.88557	0.00701648	0.109942	-2.33353	-2.69606	0.0697623
CECR3	0.276436	4.18798	3.05693	0.00701678	0.109942	-1.92061	2.69605	0.0697623
CCSER2	-0.102681	7.2073	-2.99669	0.00703132	0.109967	-2.32012	-2.69536	0.0697783
RAB28	-0.117524	7.93778	-2.90247	0.00703346	0.109967	-2.55002	-2.69526	0.0697783
AC063944.1	-0.372881	1.69003	-3.27153	0.00703671	0.109967	-1.18037	-2.6951	0.0697783
ORC3	0.14542	6.09452	2.87354	0.00704356	0.109978	-2.42726	2.69478	0.0697856
AC010457.1	0.393711	1.83746	2.76019	0.00706307	0.110187	-2.44553	2.69386	0.0699183
CASP8	0.957806	5.16205	2.75356	0.00710326	0.110719	-2.88437	2.69196	0.0702553
MAP3K12	0.213809	4.68039	2.80055	0.00711629	0.110742	-2.43687	2.69135	0.0702699
DPYSL2	0.219065	5.58613	2.89688	0.00712408	0.110742	-2.39587	2.69099	0.0702699
AC106052.1	0.412038	0.109173	2.93469	0.00712964	0.110742	-2.08695	2.69073	0.0702699
MYO9A	-0.129557	8.31789	-2.84915	0.00712987	0.110742	-2.6535	-2.69072	0.0702699
AC006001.2	0.323553	7.46565	2.89277	0.00713637	0.110742	-2.51347	2.69041	0.0702699
AL158167.1	0.34828	2.95581	2.93909	0.00714164	0.110742	-2.04926	2.69017	0.0702699
ZBED5	-0.206404	5.01875	-2.78966	0.00716284	0.110975	-2.49689	-2.68918	0.0704178
DENND2A	-0.944003	3.1854	-3.45713	0.0071734	0.111043	-0.758641	-2.68869	0.070461
AL121790.1	-0.438482	0.235262	-3.12668	0.00719061	0.111141	-1.5434	-2.68789	0.0705233
PCOLCE-AS1	0.399994	1.56253	2.8721	0.00719209	0.111141	-2.16909	2.68782	0.0705233
SYNCRIP	-0.0993121	5.06667	-2.74815	0.00721234	0.111358	-3.01263	-2.68688	0.0706612
PLCG1	-0.189643	3.11669	-3.36521	0.00721949	0.111373	-1.0124	-2.68655	0.0706707
IAH1	0.183312	4.85872	2.84227	0.00723798	0.111563	-2.38756	2.68569	0.070791
NANP	-0.3034	2.61065	-2.84217	0.00725238	0.111596	-2.23679	-2.68503	0.0708123
KIAA1614	-0.181341	6.31159	-2.75759	0.00725255	0.111596	-2.6361	-2.68502	0.0708123
TMEM116	0.14085	4.66229	3.39004	0.00726753	0.111731	-1.1196	2.68433	0.0708979
PHYHIPL	-0.186107	5.26079	-2.86957	0.00730148	0.112157	-2.39819	-2.68277	0.0711683
AC117834.1	0.366902	3.8795	2.74993	0.00730939	0.112183	-2.47735	2.68241	0.0711846
KLF15	-0.386362	1.21427	-3.41855	0.00733378	0.112443	-0.778324	-2.6813	0.0713495
DPF1	0.231356	1.64354	2.74197	0.00733881	0.112443	-2.52489	2.68107	0.0713495
AP005136.4	-0.546762	-0.0678164	-3.03795	0.00735411	0.112575	-1.95633	-2.68037	0.0714335
AL162411.1	-0.630751	-0.813586	-2.74027	0.00737398	0.112575	-2.45903	-2.67947	0.0714335
AC023136.1	0.319331	5.57962	2.75185	0.00737469	0.112575	-2.59798	2.67943	0.0714335
KIDINS220	-0.110823	6.54917	-2.95997	0.00738215	0.112575	-2.33405	-2.67909	0.0714335
ZNF782	-0.173316	6.31443	-2.8185	0.00738875	0.112575	-2.56637	-2.6788	0.0714335
CRTC3-AS1	0.194534	3.57588	3.01946	0.00739182	0.112575	-1.93286	2.67866	0.0714335
ATG16L2	0.190584	4.15249	2.94702	0.0073968	0.112575	-2.17299	2.67843	0.0714335
ETV6	-0.290954	5.00959	-3.27093	0.00739748	0.112575	-1.37678	-2.6784	0.0714335
AC016355.1	0.314975	0.369902	2.73812	0.00741859	0.112801	-2.47918	2.67745	0.071577
AC093519.2	0.472844	2.24356	2.75561	0.0074548	0.11319	-2.43341	2.67581	0.0718235
NKAIN2	-0.243446	4.51838	-2.73629	0.00745672	0.11319	-2.981	-2.67573	0.0718235
ANKRD24	0.362002	3.3935	2.88002	0.00747177	0.113323	-2.19012	2.67505	0.0719078
C4orf47	0.321129	7.52625	3.0613	0.0074854	0.113434	-2.3092	2.67444	0.0719784
DNAJB11	-0.319561	3.21064	-3.1802	0.00750101	0.113575	-1.59307	-2.67374	0.0720678
UGDH-AS1	0.153421	5.66317	2.91393	0.00753079	0.113836	-2.3456	2.67241	0.0722335
NUTM2G	0.406388	1.56999	3.02743	0.00753399	0.113836	-1.80892	2.67227	0.0722335
CCDC22	0.211546	2.69467	3.10114	0.00753723	0.113836	-1.64402	2.67213	0.0722335
ETF1	-0.119817	4.28065	-2.73177	0.00755201	0.113964	-2.94988	-2.67147	0.0723145
PSG11	0.300812	1.92071	2.94329	0.00756261	0.114028	-2.02815	2.671	0.0723553
CENPE	0.413434	1.34556	2.98779	0.00758486	0.114193	-1.89984	2.67001	0.07246
ECPAS	-0.122528	6.47858	-2.91093	0.00759184	0.114193	-2.46382	-2.6697	0.07246
NR1H2	0.126632	4.38146	3.39033	0.00759376	0.114193	-1.10986	2.66962	0.07246
TLCD5	-0.221425	5.66465	-2.74038	0.00759892	0.114193	-2.625	-2.66939	0.07246
AC009152.6	0.360697	3.24003	2.73728	0.00761556	0.114348	-2.4859	2.66865	0.0725581
AC005920.2	0.287414	5.04424	2.75929	0.00765073	0.114661	-2.55663	2.66711	0.0727566
OXSM	0.353194	3.25626	3.13655	0.00765325	0.114661	-1.64911	2.667	0.0727566
AC010491.2	0.388739	1.85478	2.74188	0.00765784	0.114661	-2.47356	2.66679	0.0727566
WFDC3	0.239705	3.18723	2.72639	0.00766657	0.114661	-2.74991	2.66641	0.0727566
CCDC175	-0.22262	4.31653	-3.07575	0.00766824	0.114661	-1.93274	-2.66634	0.0727566
KAT5	0.126648	4.54365	2.72546	0.00768659	0.11484	-2.95808	2.66554	0.0728702
EIF2AK1	0.0815797	4.93692	2.72463	0.00770456	0.114945	-3.0253	2.66475	0.0729374
TAPBPL	0.252612	1.6679	2.72454	0.00770645	0.114945	-2.58908	2.66467	0.0729374
SPINT4	0.724971	1.18329	2.89287	0.00771834	0.115028	-2.12347	2.66415	0.0729895
TAF1A	-0.148053	2.83865	-2.72158	0.00777055	0.115593	-2.79176	-2.66188	0.0733485
DONSON	-0.113108	4.02141	-2.72135	0.00777542	0.115593	-2.94682	-2.66167	0.0733485
AL157392.2	-0.64301	2.71971	-2.90391	0.00777557	0.115593	-2.13216	-2.66166	0.0733485
SEMA4F	-0.197791	2.86966	-3.0595	0.0077923	0.115747	-1.90318	-2.66094	0.0734457
TMEM167A	-0.256894	5.0824	-2.73501	0.00781913	0.116016	-2.60262	-2.65978	0.0736164
MORC2	-0.179697	4.16045	-2.9067	0.0078233	0.116016	-2.23945	-2.6596	0.0736164
PPP6R1	0.185068	4.47932	2.77091	0.00783531	0.116098	-2.49564	2.65909	0.0736687
ENG	0.349976	2.17137	2.99167	0.00785108	0.116236	-1.88722	2.65841	0.0737563
AC007686.3	0.24407	1.95852	2.71733	0.00786331	0.116257	-2.62783	2.65788	0.0737697
AC022087.1	0.471365	1.40724	2.90293	0.00786543	0.116257	-2.11246	2.65779	0.0737697
ENPP1	0.803177	-0.832441	2.72516	0.00789868	0.116459	-2.84799	2.65637	0.0738976
DICER1	-0.0939541	6.7841	-2.84899	0.0079023	0.116459	-2.61006	-2.65622	0.0738976
RD3	0.204888	8.31606	2.73381	0.00790303	0.116459	-2.82548	2.65618	0.0738976
AC009120.2	0.196555	5.34759	2.77028	0.00790813	0.116459	-2.57493	2.65597	0.0738976
PITRM1	-0.13482	4.06182	-3.34574	0.0079114	0.116459	-1.23695	-2.65583	0.0738976
NUP85	0.184202	4.0886	2.87502	0.00793384	0.116694	-2.27385	2.65487	0.0740467
AC005618.4	0.345678	-0.0965998	2.7136	0.00794571	0.116773	-2.51616	2.65437	0.0740969
SCAT1	0.311499	6.66982	3.01608	0.0079582	0.116861	-2.29671	2.65384	0.0741528
LINC01176	-0.193469	5.22007	-2.9512	0.00797122	0.116876	-2.28313	-2.65329	0.0741621
PRPF6	0.143338	5.26114	2.8201	0.0079722	0.116876	-2.49564	2.65324	0.0741621
DEPDC5	0.174535	5.04805	2.73798	0.0079877	0.116876	-2.60037	2.65259	0.0741621
AL022476.1	0.500343	0.904161	2.77648	0.00799246	0.116876	-2.46022	2.65239	0.0741621
TTTY14	-0.248522	2.42337	-2.71135	0.00799566	0.116876	-3.01008	-2.65225	0.0741621
HMX1	0.632649	1.29016	2.75045	0.00799815	0.116876	-2.47288	2.65215	0.0741621
AC018653.4	0.338741	0.769593	2.71065	0.00801125	0.116972	-2.55165	2.6516	0.0742234
KLHL34	-0.4066	3.06101	-2.7467	0.00801998	0.117005	-2.45744	-2.65123	0.074244
PDK1	0.453484	6.38075	2.70982	0.00802986	0.117054	-3.19375	2.65081	0.0742753
AC007655.2	0.202974	2.05832	2.70943	0.00803864	0.117087	-2.65236	2.65044	0.0742964
FAM24B	-0.172834	2.62171	-3.09906	0.0080464	0.117105	-1.74365	-2.65012	0.074308
AC090709.1	0.34916	7.5953	2.7619	0.00805393	0.11712	-2.75374	2.6498	0.0743174
CCDC171	-0.191035	6.1259	-2.99227	0.00807816	0.117378	-2.29508	-2.64879	0.0744808
AP005059.2	0.372584	3.26199	2.70793	0.00809671	0.117552	-2.54521	2.64801	0.0745917
RAD51C	0.148996	4.04573	2.82146	0.00813388	0.117876	-2.39609	2.64646	0.0747968
ZNF22	-0.335089	3.63174	-2.90754	0.00813625	0.117876	-2.17397	-2.64636	0.0747968
PAK5	-0.190014	6.08995	-2.70499	0.00813862	0.117876	-3.22917	-2.64626	0.0747968
INTS6	-0.117283	6.44954	-2.70445	0.00815087	0.117958	-3.26107	-2.64576	0.0748492
CNBD1	-0.553182	5.92909	-2.70344	0.00817372	0.118194	-3.28726	-2.64481	0.0749987
ZDHHC24	0.206456	3.58536	2.88588	0.00818289	0.118232	-2.23942	2.64443	0.0750226
AC022146.2	0.280642	5.67657	2.93965	0.00820445	0.1184	-2.28095	2.64354	0.0751297
AC020915.2	0.244686	3.52513	2.81249	0.00821297	0.1184	-2.36102	2.64319	0.0751297
PURA	-0.201158	6.26455	-2.73273	0.0082143	0.1184	-2.7112	-2.64313	0.0751297
RTCA-AS1	-0.293027	3.67276	-2.72712	0.00822314	0.118402	-2.52773	-2.64277	0.0751306
LHPP	0.221324	5.59196	2.75357	0.00822756	0.118402	-2.63459	2.64259	0.0751306
SV2C	0.798813	0.366366	2.86778	0.00823604	0.118406	-2.20004	2.64224	0.075133
RORB-AS1	-0.336061	5.13476	-2.75624	0.00824674	0.118406	-2.58902	-2.6418	0.075133
IFI27L2	-0.365692	4.67568	-2.70284	0.00824755	0.118406	-2.62406	-2.64176	0.075133
LINC01588	-0.303841	2.5294	-2.84561	0.00826016	0.118492	-2.25154	-2.64125	0.0751879
AC080162.1	0.198958	4.03328	2.83273	0.00827383	0.118594	-2.39186	2.64069	0.0752524
AC004834.1	0.398854	2.70271	3.08674	0.00829668	0.118827	-1.69705	2.63975	0.0754002
VARS2	-0.241166	1.52839	-2.69723	0.00831631	0.119013	-2.70449	-2.63895	0.0755185
LEPROTL1	-0.244512	4.85489	-2.71943	0.00833577	0.119197	-2.62484	-2.63816	0.075635
AL356124.1	-1.4818	1.46243	-2.85878	0.00834454	0.119225	-2.20833	-2.6378	0.0756531
ZNF517	0.281111	2.30102	2.80616	0.00835753	0.119225	-2.31886	2.63727	0.0756531
MELTF-AS1	0.359301	1.97695	2.96078	0.00835763	0.119225	-1.99804	2.63727	0.0756531
AKR1A1	0.199037	4.54889	2.94883	0.00838138	0.119469	-2.20003	2.63631	0.0758081
PDXDC1	0.177417	6.43985	3.12189	0.00840017	0.119526	-2.00988	2.63555	0.075844
AL592430.1	0.323548	3.40933	2.6941	0.00842028	0.119526	-2.58001	2.63474	0.075844
TMEM178B	-0.331262	5.82096	-3.01456	0.00842602	0.119526	-2.1545	-2.6345	0.075844
EML5	-0.137572	8.32759	-2.78964	0.0084276	0.119526	-2.79427	-2.63444	0.075844
SMYD4	0.167535	4.54935	2.84152	0.00843589	0.119526	-2.42938	2.63411	0.075844
TDP2	-0.157435	3.93823	-2.99344	0.00843921	0.119526	-2.11832	-2.63397	0.075844
LINC01772	0.284317	2.20201	2.77972	0.00844192	0.119526	-2.37663	2.63386	0.075844
RBPMS	0.296671	4.59828	2.69159	0.00844742	0.119526	-3.03185	2.63364	0.075844
ACOT11	-0.577815	-0.343652	-2.6915	0.00844968	0.119526	-2.57643	-2.63355	0.075844
CCDC125	0.16561	5.39009	2.78024	0.00845174	0.119526	-2.59094	2.63347	0.075844
MEF2B	0.289981	2.86073	3.0512	0.00846099	0.119563	-1.82612	2.6331	0.0758673
BRMS1L	-0.172879	4.39042	-3.08137	0.00847685	0.119606	-2.0306	-2.63246	0.0758947
AP000487.1	0.215569	3.13694	2.9379	0.00847733	0.119606	-2.05455	2.63244	0.0758947
AC092040.1	0.316549	4.62032	2.76951	0.00850067	0.119769	-2.55316	2.63151	0.0759979
SOX21-AS1	-0.33332	0.178929	-2.68903	0.00850765	0.119769	-2.63358	-2.63123	0.0759979
SLC27A1	0.179066	5.28519	2.71306	0.00850881	0.119769	-2.68077	2.63118	0.0759979
ADGRL2	-0.309889	6.63331	-2.68836	0.00852364	0.119884	-3.34187	-2.63059	0.0760709
AC060809.1	0.71081	0.399485	2.83419	0.00853709	0.119903	-2.33808	2.63006	0.0760828
DNAJC7	0.124049	5.98971	3.11085	0.0085383	0.119903	-1.90872	2.63001	0.0760828
AL358937.1	-0.388576	0.781007	-3.19894	0.00854612	0.119919	-1.37372	-2.6297	0.0760931
LINC00470	-0.77292	1.356	-3.52204	0.00856167	0.120036	-0.513319	-2.62908	0.0761674
VWA8-AS1	0.340861	2.10873	2.94024	0.0085678	0.120036	-2.0092	2.62883	0.0761674
BCLAF1	-0.148966	6.63149	-2.79065	0.00858327	0.120103	-2.7104	-2.62822	0.0762102
AC068631.1	-0.433292	-0.144055	-3.09469	0.00858948	0.120103	-1.69555	-2.62798	0.0762102
MTAP	0.896252	-0.484974	2.73636	0.00859318	0.120103	-2.73938	2.62783	0.0762102
MAST2	0.149606	8.16293	2.70657	0.00860269	0.120103	-2.88577	2.62745	0.0762102
NEFM	1.31679	1.44948	2.84685	0.00860601	0.120103	-2.22802	2.62732	0.0762102
DDX39B	0.13959	5.5662	2.80052	0.00861743	0.120103	-2.56868	2.62687	0.0762102
NUP62CL	-0.493658	1.83304	-2.82201	0.0086269	0.120103	-2.28402	-2.6265	0.0762102
CCDC85B	-0.450218	4.49543	-2.68949	0.00862731	0.120103	-2.64873	-2.62648	0.0762102
RBP2	0.394277	3.2673	2.71462	0.00864098	0.120103	-2.5442	2.62594	0.0762102
TRIM5	-0.491	1.02741	-3.00884	0.00864573	0.120103	-1.85106	-2.62575	0.0762102
CLEC6A	0.483778	0.0494206	3.13212	0.008646	0.120103	-1.54619	2.62574	0.0762102
SPG7	0.122004	6.0988	2.84118	0.00865353	0.120115	-2.56119	2.62545	0.0762178
SCN3A	0.351817	8.48739	2.79997	0.00871131	0.120824	-2.81602	2.62318	0.0766677
TTC9	0.649125	3.57173	2.94343	0.00875043	0.121273	-2.16133	2.62165	0.0769526
SRR	0.128023	3.59919	2.67839	0.00876206	0.121341	-2.9527	2.6212	0.0769957
KIF23	-0.451588	0.216262	-3.73449	0.00878996	0.121579	0.13223	-2.62012	0.0771464
FAM81A	-0.303511	2.46387	-2.99025	0.00879826	0.121579	-1.93655	-2.6198	0.0771464
LINC02340	0.463907	2.96646	2.89125	0.00879948	0.121579	-2.15517	2.61975	0.0771464
AC016907.2	0.335183	3.31888	2.87558	0.00881193	0.121657	-2.32598	2.61927	0.0771963
PPFIA2-AS1	0.327408	5.63975	2.6857	0.00883162	0.121836	-2.76535	2.6185	0.0773096
MIR133A1HG	0.379544	1.54535	2.81866	0.00887844	0.122388	-2.28761	2.6167	0.0776599
ANKRD18A	-0.824799	0.136653	-2.90683	0.00889538	0.122437	-2.13332	-2.61605	0.0776909
BDNF-AS	0.221576	5.5654	2.77954	0.00891451	0.122437	-2.65646	2.61532	0.0776909
PDS5B	-0.126841	6.25368	-3.08422	0.00892266	0.122437	-2.20342	-2.615	0.0776909
STK33	-0.12822	8.87733	-2.72374	0.00892376	0.122437	-2.94612	-2.61496	0.0776909
PTPRR	-0.624299	0.596245	-2.67166	0.00892655	0.122437	-2.666	-2.61485	0.0776909
HIVEP1	-0.173762	5.63091	-2.70263	0.00893729	0.122437	-2.76233	-2.61444	0.0776909
DOCK1	-0.624988	0.748674	-3.17073	0.00895406	0.122437	-1.44372	-2.6138	0.0776909
DYNC2LI1	0.118259	6.29251	2.8016	0.00895481	0.122437	-2.65045	2.61377	0.0776909
B4GALNT4	0.465724	1.69672	2.67046	0.00895635	0.122437	-2.70654	2.61372	0.0776909
ANGPTL1	0.310181	7.25225	2.75628	0.00896634	0.122437	-2.79779	2.61333	0.0776909
AC114546.1	0.426002	1.32397	2.66988	0.00897052	0.122437	-2.67462	2.61318	0.0776909
GAD1	0.870791	1.50385	2.80592	0.00897295	0.122437	-2.33321	2.61308	0.0776909
LITAF	0.737112	0.0109821	2.75353	0.00897358	0.122437	-2.57024	2.61306	0.0776909
ZNF540	0.109071	6.68741	2.82096	0.00898332	0.122437	-2.69276	2.61269	0.0776909
STMN2	1.26586	2.74685	2.75247	0.008984	0.122437	-2.46416	2.61266	0.0776909
RSU1	-0.319244	3.73479	-2.94041	0.00901574	0.122776	-2.1527	-2.61146	0.0779064
MIA2	-0.147268	6.31972	-2.87302	0.00903217	0.122907	-2.59223	-2.61083	0.0779894
GINS4	0.329026	-0.142824	2.66651	0.00905432	0.123055	-2.6191	2.61	0.0780831
ZMYND12	0.223037	3.13866	2.85871	0.00906492	0.123055	-2.24606	2.6096	0.0780831
FCSK	0.186206	4.12213	2.75458	0.00907019	0.123055	-2.53027	2.6094	0.0780831
SMG6	0.16738	7.96504	2.68362	0.00907182	0.123055	-2.92892	2.60934	0.0780831
LINC01359	0.392735	1.15089	2.66534	0.00908353	0.123055	-2.70228	2.60889	0.0780831
GSKIP	-0.165153	5.31029	-2.90263	0.00908404	0.123055	-2.32648	-2.60888	0.0780831
PICART1	0.394493	1.36883	3.04545	0.00910245	0.123073	-1.75551	2.60818	0.0780946
USF3	-0.171897	4.5777	-3.03304	0.00910248	0.123073	-2.04244	-2.60818	0.0780946
IVNS1ABP	-0.211327	4.34425	-2.98192	0.00911256	0.123073	-2.22641	-2.6078	0.0780946
TLN2	-0.176442	7.31228	-2.66418	0.00911272	0.123073	-3.44022	-2.6078	0.0780946
ZNF135	0.21369	5.42863	3.06926	0.00912351	0.123126	-1.95895	2.60739	0.0781285
KCNMA1	-0.426919	6.42753	-3.42911	0.00913574	0.123199	-1.1914	-2.60693	0.0781746
LRRC37B	-0.135324	4.56359	-3.03258	0.00914712	0.12326	-2.02015	-2.60651	0.0782134
IFT57	-0.128004	6.69369	-2.80936	0.00917234	0.123508	-2.72649	-2.60556	0.0783704
PLAT	-0.516533	1.24131	-2.66927	0.0091843	0.123576	-2.6774	-2.60512	0.078414
LINC02519	-0.497085	0.533253	-3.10834	0.00919613	0.123643	-1.63324	-2.60468	0.0784563
GPR107	0.163196	6.28761	2.72625	0.00924087	0.124152	-2.77445	2.60301	0.0787791
HIBCH	-0.112446	8.25399	-2.80738	0.00925542	0.124212	-2.82952	-2.60247	0.0788171
KIF22	0.162864	3.45667	2.65839	0.00925912	0.124212	-2.95714	2.60234	0.0788171
AC022395.1	0.346133	3.53342	2.67906	0.00929003	0.124432	-2.63644	2.60119	0.0789572
NEUROD1	-0.270873	6.8431	-2.70274	0.00929304	0.124432	-2.86174	-2.60108	0.0789572
ATXN3	0.168785	5.64698	2.7111	0.00931186	0.124432	-2.72737	2.60039	0.0789572
AC016831.1	-0.440465	1.62633	-2.67518	0.00931246	0.124432	-2.62546	-2.60037	0.0789572
LZIC	0.128749	4.64983	3.05854	0.009314	0.124432	-2.06063	2.60031	0.0789572
AC007823.1	-0.309795	-0.122823	-2.65613	0.00931704	0.124432	-2.66267	-2.6002	0.0789572
AC116552.1	-0.321726	-0.148901	-2.6552	0.00934092	0.124578	-2.66062	-2.59932	0.0790498
AL157896.1	-0.525291	0.0241102	-3.44485	0.00934246	0.124578	-0.700208	-2.59926	0.0790498
AC137770.1	-0.269106	7.5027	-2.73194	0.00934873	0.124578	-2.86542	-2.59903	0.0790498
LYNX1	0.842251	-0.284651	2.7627	0.00936293	0.124675	-2.57006	2.59851	0.0791112
MIS18BP1	-0.188931	3.91761	-2.65372	0.00937881	0.124794	-3.11959	-2.59793	0.0791869
TRAPPC13	0.166363	5.61757	3.31982	0.00938822	0.124827	-1.32005	2.59758	0.0792077
SLC35E4	-0.220715	4.40013	-2.89436	0.0094061	0.124939	-2.27449	-2.59693	0.0792785
AC017101.1	0.267279	6.25414	2.67791	0.0094213	0.124939	-2.84189	2.59638	0.0792785
TENT4B	-0.108098	5.6125	-2.65186	0.00942704	0.124939	-3.30046	-2.59617	0.0792785
POC1A	-0.350096	-0.142403	-2.65149	0.00943665	0.124939	-2.66543	-2.59582	0.0792785
PTPN4	-0.112933	7.30316	-2.81876	0.00945256	0.124939	-2.79914	-2.59524	0.0792785
AC015853.2	0.3428	1.05905	2.65048	0.00946277	0.124939	-2.69127	2.59487	0.0792785
ZNF814	0.107151	5.77491	2.9782	0.00946507	0.124939	-2.4316	2.59478	0.0792785
SYNE2	-0.480007	7.35208	-2.65022	0.00946952	0.124939	-3.50064	-2.59462	0.0792785
AC092422.1	-0.50752	6.42242	-2.65014	0.0094715	0.124939	-3.4319	-2.59455	0.0792785
MAPK13	0.331572	1.87083	2.64974	0.00948209	0.124939	-2.79255	2.59417	0.0792785
ZNF787	-0.135757	6.27653	-2.64927	0.00949418	0.124939	-3.38612	-2.59373	0.0792785
AC126121.3	0.344825	2.34246	2.64919	0.00949633	0.124939	-2.84168	2.59365	0.0792785
CCND2	0.753184	0.240654	2.67033	0.00949823	0.124939	-2.76001	2.59358	0.0792785
PWP1	0.110711	4.52663	2.64875	0.00950773	0.124939	-3.14809	2.59324	0.0792785
NAGA	0.171086	1.73201	2.6487	0.00950905	0.124939	-2.79013	2.59319	0.0792785
OAT	0.184308	4.64916	2.78442	0.00951089	0.124939	-2.54263	2.59312	0.0792785
SYN3	0.665293	1.76689	2.64849	0.00951458	0.124939	-2.7402	2.59299	0.0792785
AC024896.1	0.506822	0.438393	2.67259	0.00954017	0.125148	-2.72915	2.59207	0.0794114
AC021321.2	-0.36616	0.255413	-3.23229	0.00954675	0.125148	-1.2725	-2.59183	0.0794114
CDK5R2	-0.440211	3.90628	-2.66204	0.00955605	0.125148	-2.68346	-2.59149	0.0794114
RCOR3	-0.0923583	6.70651	-2.94307	0.00956293	0.125148	-2.50159	-2.59125	0.0794114
CFAP47	-0.175232	7.26705	-2.87965	0.00956956	0.125148	-2.69246	-2.59101	0.0794114
C1GALT1	-0.0942114	6.98805	-2.64629	0.00957223	0.125148	-3.45229	-2.59091	0.0794114
XRN2	-0.106517	5.94991	-2.92225	0.00959565	0.125286	-2.46957	-2.59007	0.0794987
AC011330.2	-0.238685	1.00769	-2.64536	0.00959668	0.125286	-2.76121	-2.59003	0.0794987
ATG2B	-0.150775	5.84409	-2.81974	0.00961065	0.125377	-2.66978	-2.58953	0.0795568
AC092666.1	0.79127	-0.432133	2.70199	0.00962946	0.125424	-2.76059	2.58886	0.0795867
MID2	-0.182162	4.71614	-2.79038	0.00963379	0.125424	-2.59109	-2.5887	0.0795867
ERCC6L2	-0.135562	6.32971	-2.89064	0.00963517	0.125424	-2.54957	-2.58865	0.0795867
FALEC	0.303508	3.16611	2.68526	0.0096435	0.125442	-2.60201	2.58836	0.079598
RABGEF1	0.259424	9.13971	2.78916	0.00966499	0.125631	-2.88521	2.58759	0.0797177
AC009152.3	0.367942	3.68878	2.64873	0.00969051	0.125872	-2.70399	2.58668	0.0798705
AC090625.2	0.44011	0.36665	2.79369	0.00973328	0.126336	-2.38839	2.58516	0.0801652
CD276	-0.181734	4.72449	-2.73342	0.00975861	0.126573	-2.67641	-2.58427	0.0803154
VANGL1	0.264646	5.67157	2.63899	0.00976557	0.126573	-3.3064	2.58402	0.0803154
POLA2	0.253597	3.82217	2.95252	0.00978048	0.126675	-2.12303	2.5835	0.0803801
AF130417.1	-0.350139	1.56325	-2.63759	0.00980326	0.126879	-2.82906	-2.58269	0.0805094
ATG16L1	-0.178295	3.95514	-3.40498	0.00985598	0.127469	-0.915672	-2.58084	0.0808842
SPCS2	-0.162067	6.11827	-2.6525	0.00987934	0.12768	-2.89105	-2.58002	0.0810178
TAC4	0.218369	3.5738	2.63199	0.00995455	0.12848	-3.0338	2.5774	0.0815256
RAB9B	0.316918	0.496631	2.63171	0.00996204	0.12848	-2.7074	2.57714	0.0815256
AC090572.2	-0.501629	3.53952	-2.63169	0.00996268	0.12848	-3.17418	-2.57712	0.0815256
TNFSF4	-0.175571	2.22517	-2.63124	0.00997487	0.128544	-2.91826	-2.5767	0.0815664
ZNF367	0.351531	0.296312	2.63098	0.00998194	0.128544	-2.70661	2.57645	0.0815664
AC013468.1	-0.22459	1.85226	-2.63022	0.0100028	0.128709	-2.90931	-2.57573	0.0816706
PJA2	-0.110913	5.83378	-2.90303	0.0100123	0.128709	-2.48323	-2.5754	0.0816706
MIR4453HG	0.254914	3.00716	2.74519	0.0100161	0.128709	-2.49181	2.57527	0.0816706
FUT2	0.325968	2.69649	2.75386	0.0100277	0.128765	-2.45139	2.57487	0.0817067
HK2	0.397464	7.11061	2.62871	0.0100441	0.128884	-3.45762	2.57431	0.081782
AL645940.1	-0.286011	0.541696	-2.62775	0.0100704	0.12901	-2.76163	-2.5734	0.0818617
STAM	-0.119856	5.4206	-2.62719	0.0100858	0.12901	-3.35436	-2.57287	0.0818617
AC020892.2	0.303068	2.47861	2.8657	0.0100882	0.12901	-2.24283	2.57279	0.0818617
AL139289.2	0.288175	1.75044	2.92021	0.0100897	0.12901	-2.06046	2.57274	0.0818617
AC011933.4	0.31268	4.42947	2.70505	0.0100897	0.12901	-2.65786	2.57274	0.0818617
AC022267.1	-0.346661	0.0784581	-2.9569	0.0101056	0.129045	-1.96201	-2.5722	0.0818843
HSF5	-0.391746	0.728966	-3.38434	0.0101076	0.129045	-0.863199	-2.57213	0.0818843
LAMC1	-0.30379	4.34813	-2.95882	0.010114	0.129045	-2.22996	-2.57191	0.0818843
RIMKLA	0.216567	5.90697	2.88909	0.0101358	0.129205	-2.70241	2.57116	0.0819857
RAMAC	-0.450896	1.86848	-2.63035	0.0101409	0.129205	-2.70927	-2.57099	0.0819857
TAS1R1	-0.34571	1.09223	-3.12278	0.0101552	0.129295	-1.57736	-2.5705	0.0820429
MVD	0.212523	4.07311	3.03499	0.0101785	0.129501	-2.02322	2.5697	0.0821736
LINC02246	-0.308779	1.57044	-3.01831	0.0101936	0.129601	-1.86673	-2.56919	0.0822371
AC113385.1	0.354969	2.97615	2.65116	0.0102386	0.129996	-2.67253	2.56766	0.0824873
CRIP3	-0.332215	-0.431861	-2.62166	0.0102391	0.129996	-2.71796	-2.56765	0.0824873
PGD	-0.161026	5.18283	-3.08154	0.0102608	0.13018	-2.14047	-2.56692	0.082604
DNAJC3	-0.186856	5.3909	-2.85525	0.0102943	0.130513	-2.42915	-2.56578	0.0828154
MIR4300HG	-0.361655	1.38067	-2.61928	0.0103058	0.130567	-2.86377	-2.56539	0.0828501
EXOC7	0.169453	5.42718	2.66461	0.0103281	0.130757	-2.82966	2.56465	0.0829704
SHPRH	-0.126258	7.98146	-2.737	0.0103584	0.130961	-2.96126	-2.56363	0.0831002
PCYOX1L	0.256385	1.46533	2.61739	0.0103588	0.130961	-2.8155	2.56362	0.0831002
PARP14	-0.451099	0.411762	-3.02153	0.0103757	0.131027	-1.82778	-2.56305	0.0831418
OPN1MW	0.471006	5.17395	2.61669	0.0103785	0.131027	-3.27013	2.56296	0.0831418
AL845331.2	0.547898	0.329796	2.93788	0.0104243	0.131513	-2.02324	2.56143	0.0834504
AC006974.1	0.805026	-0.78349	2.73678	0.0104348	0.131554	-2.6586	2.56108	0.0834759
LINGO3	0.387273	0.354192	2.61417	0.01045	0.131636	-2.74012	2.56057	0.0835282
CLDN12	-0.131658	4.52516	-2.872	0.010456	0.131636	-2.47968	-2.56037	0.0835282
EPHX1	-0.194371	4.47289	-2.64816	0.0104799	0.131794	-2.77287	-2.55958	0.0836287
ZNF112	-0.181606	3.3567	-3.00898	0.0104843	0.131794	-2.04003	-2.55943	0.0836287
CLCN4	-0.135428	7.10429	-2.72816	0.0104946	0.131794	-2.90816	-2.55909	0.0836287
AC007325.4	0.446754	0.978114	2.8003	0.0104979	0.131794	-2.33699	2.55898	0.0836287
DCUN1D5	-0.0983259	4.76342	-2.6122	0.0105061	0.131806	-3.30104	-2.55871	0.0836361
RSPH4A	-0.128547	3.41213	-2.61167	0.0105214	0.13187	-3.13609	-2.5582	0.083677
AC010307.4	0.215039	3.53007	2.81444	0.0105259	0.13187	-2.50819	2.55806	0.083677
CXXC4	-0.154795	5.63364	-3.02456	0.010562	0.132231	-2.33444	-2.55687	0.0839054
KIAA0825	-0.182448	9.33412	-2.71809	0.0106078	0.132711	-3.07371	-2.55536	0.0842106
TMEM106B	-0.150566	5.45151	-2.66088	0.0106515	0.133116	-2.85011	-2.55393	0.0844673
TXNIP	-0.71428	3.36898	-3.01477	0.0106549	0.133116	-1.95824	-2.55382	0.0844673
MUTYH	0.186916	4.12533	2.82673	0.0106693	0.133147	-2.39811	2.55335	0.0844872
TRIM33	-0.129438	7.4394	-2.65309	0.0106722	0.133147	-3.01317	-2.55325	0.0844872
STK24	-0.192972	7.02855	-2.60528	0.0107056	0.133371	-3.57548	-2.55217	0.0846291
LINC01640	0.354865	3.53011	2.81066	0.0107071	0.133371	-2.53587	2.55211	0.0846291
LINC01505	-0.201362	4.87236	-2.99685	0.0107123	0.133371	-2.2624	-2.55194	0.0846291
LINC01237	-0.382187	0.338108	-2.60299	0.0107723	0.134024	-2.81634	-2.55	0.0850433
SYNC	0.273767	5.00925	2.69214	0.0107797	0.134024	-2.77798	2.54976	0.0850433
TAB3	-0.117695	5.21586	-2.83944	0.0107953	0.134118	-2.65331	-2.54926	0.0851032
AC090579.1	0.387718	7.3035	2.64205	0.0108044	0.134118	-3.01117	2.54896	0.0851032
AL109615.3	0.325443	3.13295	3.15644	0.0108137	0.134118	-1.6097	2.54866	0.0851032
TANGO2	0.188226	2.94098	3.03494	0.0108259	0.134118	-1.91494	2.54827	0.0851032
SEC31B	0.278423	5.3427	2.66791	0.0108303	0.134118	-2.83372	2.54813	0.0851032
AC116428.1	0.315971	1.50596	2.86249	0.010832	0.134118	-2.18884	2.54807	0.0851032
2023-03-02	0.265289	3.6421	3.33506	0.0108455	0.134194	-1.06956	2.54764	0.085151
AC003681.1	0.280737	4.67955	2.60636	0.0108637	0.134326	-2.86286	2.54705	0.0852351
GPR12	0.868945	0.124016	2.68099	0.0108873	0.134341	-2.68772	2.5463	0.0852448
PRDM15	-0.197421	2.67524	-3.09985	0.0108937	0.134341	-1.72596	-2.54609	0.0852448
GNG7	0.243119	4.2173	2.69865	0.0108938	0.134341	-2.6591	2.54609	0.0852448
SPINK8	0.296891	3.34535	2.80828	0.0108967	0.134341	-2.40683	2.54599	0.0852448
AC092839.1	0.24068	4.37612	2.6714	0.0109022	0.134341	-2.76272	2.54582	0.0852448
AL157756.1	0.220849	2.39175	2.59767	0.0109289	0.134578	-2.97682	2.54496	0.0853952
AL109829.1	0.846684	-1.2606	3.03968	0.0109509	0.134653	-1.94159	2.54426	0.0854425
AF131216.3	0.52968	2.07251	2.59673	0.0109568	0.134653	-2.91188	2.54407	0.0854425
OLA1	-0.0950485	7.41778	-3.17593	0.0109574	0.134653	-2.04322	-2.54405	0.0854425
SLC7A2	-0.161697	7.32216	-2.6477	0.0109791	0.134713	-3.03192	-2.54336	0.0854808
SUMF2	0.203355	4.24028	2.70797	0.0109921	0.134713	-2.66382	2.54295	0.0854808
MAVS	0.169326	4.47535	2.64692	0.0109927	0.134713	-2.79109	2.54293	0.0854808
AL513365.2	0.178975	5.23823	2.59542	0.0109956	0.134713	-3.33675	2.54284	0.0854808
METTL14-DT	0.23687	1.21339	2.59509	0.0110053	0.134713	-2.84877	2.54253	0.0854808
NRN1	1.0476	2.31503	2.68877	0.0110072	0.134713	-2.58642	2.54247	0.0854808
CAMSAP2	-0.122829	6.6079	-2.74438	0.0110442	0.135073	-2.86432	-2.5413	0.0857093
AC002429.2	0.284743	7.0682	2.62702	0.0110607	0.135116	-3.03178	2.54078	0.0857366
CAPN10	0.236299	2.98773	2.71325	0.0110627	0.135116	-2.55557	2.54071	0.0857366
AC084361.1	0.360206	6.52663	2.59552	0.0110998	0.135212	-3.03117	2.53954	0.085797
AL161757.4	0.225689	9.41764	2.80856	0.0111095	0.135212	-2.95724	2.53923	0.085797
AC105345.1	-0.258058	1.90476	-3.0347	0.0111121	0.135212	-1.84627	-2.53915	0.085797
AL357522.1	-0.226693	1.48759	-2.59148	0.0111134	0.135212	-2.92882	-2.53911	0.085797
INTS13	-0.108265	5.45943	-3.02908	0.0111136	0.135212	-2.26766	-2.53911	0.085797
HORMAD1	-0.302059	1.35162	-2.92378	0.0111219	0.135212	-2.10686	-2.53885	0.085797
AC008731.1	0.214121	5.17189	2.7325	0.0111331	0.135212	-2.7527	2.53849	0.085797
TACR1	0.374918	6.5936	2.65526	0.0111361	0.135212	-2.95992	2.5384	0.085797
NUF2	0.305008	3.37137	2.65278	0.0111443	0.135212	-2.70072	2.53814	0.085797
DAXX	-0.332847	1.68876	-2.87501	0.0111616	0.135212	-2.18543	-2.5376	0.085797
AC243571.2	0.304688	0.453767	2.58934	0.011178	0.135212	-2.79885	2.53709	0.085797
TRMT2A	0.202893	1.8093	2.58929	0.0111795	0.135212	-2.91921	2.53704	0.085797
AL353768.2	0.256224	1.84296	2.78485	0.0111993	0.135212	-2.40656	2.53642	0.085797
ROBO2	-0.671847	4.68694	-2.85178	0.0112012	0.135212	-2.4918	-2.53636	0.085797
AC090907.2	0.281654	0.0273918	2.5885	0.0112033	0.135212	-2.78773	2.53629	0.085797
AC126178.1	-0.270645	0.782319	-2.58824	0.0112111	0.135212	-2.85319	-2.53605	0.085797
LDHB	-0.371259	5.61884	-2.61331	0.0112125	0.135212	-2.94965	-2.53601	0.085797
LINC01091	0.406914	1.96262	2.58817	0.0112134	0.135212	-2.98024	2.53598	0.085797
ATG4B	0.167036	5.7492	2.58809	0.0112157	0.135212	-3.44216	2.5359	0.085797
APIP	0.201719	5.31271	2.78752	0.0112242	0.135212	-2.75785	2.53564	0.085797
UBOX5-AS1	0.289881	4.16681	2.65064	0.0112282	0.135212	-2.75617	2.53552	0.085797
CHKB	0.217398	5.10385	2.66565	0.0112673	0.135499	-2.82802	2.5343	0.0859797
DGCR8	0.150591	4.74477	2.68561	0.0112677	0.135499	-2.74928	2.53429	0.0859797
AC048380.1	0.460494	1.28872	2.59804	0.0112884	0.135499	-2.79556	2.53364	0.0859797
EHD4	-0.184397	4.13833	-2.9477	0.0112891	0.135499	-2.24689	-2.53362	0.0859797
AC109454.3	0.239966	5.69765	2.78101	0.0112897	0.135499	-2.75933	2.5336	0.0859797
AC009061.2	0.231078	4.98505	2.77502	0.0113067	0.135613	-2.68837	2.53307	0.0860515
AAAS	0.186596	3.84773	2.68033	0.0113628	0.136182	-2.69084	2.53134	0.086413
ELOVL4	-0.162574	6.67713	-2.66029	0.0113693	0.136182	-2.97256	-2.53114	0.086413
AC002064.1	-0.257132	2.32121	-2.97136	0.0113979	0.136373	-2.09718	-2.53026	0.0865343
FAM135A	-0.101828	6.75775	-2.76583	0.0114004	0.136373	-2.87686	-2.53018	0.0865343
WDR93	0.239342	5.02559	2.75529	0.0114181	0.13641	-2.64671	2.52964	0.0865575
TSC22D2	-0.172719	6.90045	-2.67044	0.0114211	0.13641	-3.03404	-2.52954	0.0865575
STK10	-0.250596	1.87174	-2.58111	0.011429	0.13641	-2.9674	-2.5293	0.0865575
ZBTB26	-0.167922	3.59234	-2.76602	0.0114417	0.13641	-2.51337	-2.52891	0.0865575
CSNK1G3	-0.15575	4.71021	-2.98822	0.0114479	0.13641	-2.18065	-2.52872	0.0865575
ZNF425	0.258054	2.75469	2.84605	0.011449	0.13641	-2.28796	2.52869	0.0865575
SGK1	0.419084	5.55992	2.57939	0.0114821	0.136715	-3.41254	2.52767	0.0867508
PLA2G4E-AS1	0.367731	-0.0565534	2.57863	0.0115059	0.136907	-2.80896	2.52695	0.0868727
SLC1A7	0.187321	6.82392	2.58735	0.0115275	0.137073	-3.0768	2.52629	0.0869785
NCAM1	-0.135833	7.71039	-2.74883	0.0115559	0.13732	-3.03142	-2.52542	0.0871351
RFX1	0.142428	4.99169	2.63453	0.0115817	0.137478	-2.88412	2.52464	0.087235
POMK	-0.149979	3.20103	-2.57587	0.0115916	0.137478	-3.18449	-2.52434	0.087235
MRPL20-AS1	0.305153	1.36522	2.57586	0.011592	0.137478	-2.89401	2.52433	0.087235
ATP8B1	0.457899	2.64406	2.63951	0.0116209	0.13773	-2.69233	2.52345	0.0873949
AP001922.6	-0.351124	1.56901	-2.81312	0.0116334	0.137745	-2.32642	-2.52307	0.0874047
VEGFA	0.341889	4.79112	2.57399	0.0116504	0.137745	-3.3686	2.52256	0.0874047
CAMK2N2	0.921245	0.601002	2.63849	0.0116642	0.137745	-2.71258	2.52214	0.0874047
FAM184B	0.269698	4.73309	2.57328	0.0116729	0.137745	-3.32473	2.52188	0.0874047
TYRO3	0.478438	1.00039	2.5732	0.0116753	0.137745	-2.88697	2.52181	0.0874047
GSTK1	0.255624	3.65198	2.65506	0.0116849	0.137745	-2.72691	2.52152	0.0874047
HEATR1	-0.15382	4.20075	-2.57279	0.0116881	0.137745	-3.32926	-2.52142	0.0874047
FAM126B	-0.121336	7.28898	-2.72334	0.0116961	0.137745	-2.96859	-2.52118	0.0874047
AC022196.1	-0.303461	-0.168386	-2.57215	0.0117084	0.137745	-2.8384	-2.52081	0.0874047
SMIM15-AS1	0.194671	2.61371	2.57203	0.011712	0.137745	-3.04653	2.5207	0.0874047
SDC3	-0.329661	2.39282	-2.73748	0.0117138	0.137745	-2.50194	-2.52065	0.0874047
RHOXF1	-0.366267	1.14176	-2.57178	0.0117201	0.137745	-2.9244	-2.52046	0.0874047
RAB11B-AS1	0.271397	2.09234	2.75813	0.0117217	0.137745	-2.42733	2.52041	0.0874047
AL035252.3	-0.354813	-0.29611	-2.91636	0.0117459	0.137939	-2.05998	-2.51969	0.0875279
CD2AP	-0.119472	6.2513	-2.66617	0.0117722	0.138159	-3.00152	-2.5189	0.0876671
GNG4	0.635573	0.491066	2.84064	0.0117932	0.138315	-2.24968	2.51827	0.0877662
ZNF568	0.0735227	5.50606	2.56902	0.0118073	0.138356	-3.48117	2.51785	0.0877925
LINC01011	0.390278	0.627154	2.56887	0.0118121	0.138356	-2.85485	2.51771	0.0877925
GFOD2	-0.175304	4.21892	-2.7231	0.0118333	0.138515	-2.68726	-2.51708	0.0878929
AP1AR	-0.250765	3.04706	-3.01673	0.0118434	0.138542	-1.97682	-2.51678	0.0879104
AC015849.1	-0.338423	-0.414186	-2.5675	0.0118557	0.138597	-2.83776	-2.51641	0.087945
LAMP5	0.855308	0.86644	2.76092	0.0118655	0.138621	-2.43077	2.51612	0.0879601
ZNF462	-0.139743	7.45452	-2.66463	0.0118792	0.138691	-3.08765	-2.51571	0.0880051
DEDD	-0.15935	3.72808	-2.83714	0.011895	0.138785	-2.50082	-2.51524	0.0880648
NRAS	-0.158081	2.18988	-2.56593	0.0119057	0.138821	-3.05215	-2.51493	0.0880871
TRIM59	0.240923	4.10592	2.56474	0.0119437	0.139173	-3.30858	2.5138	0.0883108
MFSD12	0.163155	3.84797	2.56188	0.012036	0.140158	-3.23801	2.51109	0.0889357
CD5	0.631169	3.62721	3.00927	0.012062	0.140369	-1.98896	2.51033	0.0890699
NAA25	-0.0946745	7.79113	-2.56006	0.0120948	0.14066	-3.72133	-2.50937	0.0892541
SCRN1	-0.138759	6.56479	-2.59389	0.0121033	0.14066	-3.07292	-2.50912	0.0892541
AGL	0.359621	6.2796	2.56632	0.0121129	0.14066	-3.08096	2.50884	0.0892541
AC232271.1	0.260424	0.0974565	2.55934	0.0121182	0.14066	-2.85729	2.50868	0.0892541
AL354733.1	0.285903	2.70204	2.60667	0.012129	0.14066	-2.76136	2.50837	0.0892544
PHF1	0.181317	4.54213	2.71547	0.012143	0.14066	-2.72898	2.50796	0.0892544
AC000124.1	0.221962	6.54512	2.85979	0.0121454	0.14066	-2.71917	2.50789	0.0892544
NPRL3	0.132199	6.47844	2.60191	0.0121495	0.14066	-3.07415	2.50777	0.0892544
TMEM161B	-0.13761	5.09413	-2.89904	0.0121599	0.14069	-2.4405	-2.50747	0.0892736
MSH5	0.198051	6.84832	2.8215	0.0121927	0.140906	-2.81567	2.50652	0.0894106
SLC25A41	0.64416	0.456005	2.81611	0.0121942	0.140906	-2.33614	2.50647	0.0894106
Z83745.1	0.238679	1.29615	2.55633	0.0122163	0.141019	-2.94162	2.50583	0.0894822
HIST2H2BF	-0.284781	0.373851	-2.55623	0.0122196	0.141019	-2.89036	-2.50574	0.0894822
IPO8	-0.153352	4.9762	-2.78509	0.0122416	0.141182	-2.73056	-2.5051	0.0895856
PSMD1	0.149083	6.99389	2.5649	0.0122534	0.141228	-3.14263	2.50476	0.089615
RTL10	-0.277145	2.48968	-2.60705	0.0122996	0.141669	-2.75296	-2.50343	0.0898946
ZNF571-AS1	-0.144263	3.1106	-2.866	0.012311	0.14171	-2.42446	-2.5031	0.0899207
CECR2	0.118876	9.52046	2.61445	0.012407	0.142724	-3.25297	2.50035	0.0905642
LINC01284	-0.483938	2.98028	-2.75391	0.0124335	0.142938	-2.48217	-2.4996	0.0906996
DCLRE1A	-0.19613	1.65597	-2.5482	0.012485	0.143438	-3.05848	-2.49813	0.0910168
PFKP	0.402688	7.20224	2.85892	0.0125166	0.14364	-2.86883	2.49723	0.0911453
AC092720.1	0.227691	3.03442	2.6653	0.0125186	0.14364	-2.68704	2.49718	0.0911453
TLR5	-0.266343	3.30379	-2.88969	0.012566	0.144092	-2.30957	-2.49584	0.0914322
AC011455.6	0.320139	1.06562	2.54461	0.0126055	0.144366	-2.95695	2.49472	0.0916058
CUBN	-0.287161	3.26007	-2.75968	0.0126226	0.144366	-2.58813	-2.49424	0.0916058
GADD45G	0.600341	1.75664	2.63222	0.0126374	0.144366	-2.69933	2.49383	0.0916058
MTMR8	-0.228531	4.26886	-3.01156	0.0126433	0.144366	-1.98114	-2.49366	0.0916058
KCNK1	0.547406	0.0395184	2.54346	0.0126443	0.144366	-2.8797	2.49363	0.0916058
CCAR2	0.183033	3.78775	2.71611	0.0126477	0.144366	-2.61952	2.49354	0.0916058
DSCAM	-1.21329	1.49703	-2.95072	0.0126525	0.144366	-2.01266	-2.4934	0.0916058
E2F6	-0.165275	3.54398	-3.00044	0.0126599	0.144366	-2.07885	-2.4932	0.0916058
IL3RA	0.208579	6.10537	2.76064	0.0126663	0.144366	-2.82824	2.49302	0.0916058
AC019257.1	0.320724	2.22548	2.64717	0.01267	0.144366	-2.67127	2.49291	0.0916058
SEL1L2	0.364438	-0.237976	2.54211	0.0126897	0.144449	-2.87739	2.49236	0.0916583
SDHAF1	-0.437714	2.15479	-2.59424	0.0126933	0.144449	-2.77421	-2.49226	0.0916583
AC004988.1	0.346546	2.51525	2.55563	0.0127262	0.144731	-2.85723	2.49134	0.0918376
ZNF225	-0.162766	2.22863	-2.54078	0.0127348	0.144738	-3.1504	-2.4911	0.0918418
AC008537.4	0.219233	1.7952	2.5398	0.0127682	0.144882	-3.02606	2.49017	0.091933
TAGLN3	0.972236	2.50843	2.60871	0.0127714	0.144882	-2.7673	2.49008	0.091933
AC093827.4	0.232399	3.00432	2.85885	0.0127716	0.144882	-2.28078	2.49008	0.091933
AL133243.2	0.176221	2.89894	2.53795	0.0128313	0.145432	-3.1781	2.48842	0.0922821
AP000844.2	0.226537	4.49253	2.70606	0.0128362	0.145432	-2.82693	2.48828	0.0922821
AC009227.1	0.343308	3.30252	2.54091	0.0128792	0.145827	-2.91349	2.48709	0.092533
AC019211.1	0.704839	2.44071	2.74716	0.0129247	0.14625	-2.4536	2.48584	0.0928016
JPH1	-0.261773	4.35276	-2.66054	0.0129387	0.146299	-2.7913	-2.48545	0.0928323
TOGARAM2	0.370011	3.11314	2.79411	0.0129453	0.146299	-2.47341	2.48527	0.0928323
YLPM1	-0.124053	6.51142	-2.57181	0.0129817	0.146618	-3.14895	-2.48427	0.0930349
TUBB3	0.665543	3.64956	2.63056	0.0130317	0.147091	-2.82581	2.4829	0.093335
TRA2B	-0.132562	6.07082	-2.60409	0.0130453	0.147151	-3.07613	-2.48253	0.0933732
ATP2B1	-0.0969095	8.46478	-2.70788	0.0130534	0.147151	-3.14361	-2.48231	0.0933732
AC010547.3	0.351348	1.45582	2.76758	0.0130727	0.147183	-2.41147	2.48178	0.0933935
AC005052.2	0.225696	2.90946	2.80582	0.0130892	0.147183	-2.45523	2.48133	0.0933935
COG2	-0.107566	4.97028	-2.82025	0.0130917	0.147183	-2.73822	-2.48127	0.0933935
USP9Y	-0.177554	5.33842	-2.85393	0.0130923	0.147183	-2.87852	-2.48125	0.0933935
TRAM2-AS1	0.208552	2.2932	2.53015	0.0131006	0.147183	-3.09506	2.48102	0.0933935
ERI2	0.213837	3.81067	2.58973	0.0131053	0.147183	-2.86952	2.48089	0.0933935
AC016747.2	0.361343	1.73698	2.54942	0.0131171	0.147224	-2.8669	2.48057	0.0934192
LINC01675	0.322015	1.78897	2.78939	0.0131449	0.147445	-2.44414	2.47982	0.0935593
RAI2	-0.24979	3.75473	-2.74158	0.0131698	0.147631	-2.71858	-2.47915	0.0936775
DDX19A	0.109867	4.69609	2.80542	0.0132036	0.147918	-2.7109	2.47823	0.0938595
ZNF529	0.119919	6.35739	2.61296	0.0132695	0.148513	-3.10441	2.47645	0.0942374
ZC3H7A	0.121466	6.73272	2.54894	0.0132732	0.148513	-3.18985	2.47635	0.0942374
PHACTR2	0.283146	2.86727	2.52406	0.0133147	0.148885	-3.19429	2.47524	0.0944732
AC084724.1	0.286803	3.70727	2.60894	0.013327	0.148891	-2.85213	2.47491	0.0944771
PLCH1-AS1	-0.512302	0.508177	-3.08164	0.0133318	0.148891	-1.67179	-2.47478	0.0944771
FZR1	0.204512	3.57582	2.65361	0.0133506	0.149008	-2.73424	2.47428	0.0945516
FAM171B	-0.115553	5.83122	-2.74687	0.0133665	0.149018	-3.02454	-2.47385	0.0945579
TAGLN2	-0.463149	2.04226	-2.52931	0.013368	0.149018	-2.90527	-2.47381	0.0945579
MAP7	-0.110873	9.24845	-2.65386	0.013379	0.149049	-3.2616	-2.47352	0.0945772
DNAH14	-0.296693	6.48878	-2.71817	0.013406	0.149253	-3.05978	-2.4728	0.0947069
RECQL5	0.189369	3.66757	2.59773	0.0134139	0.149253	-2.84823	2.47259	0.0947069
DCST2	0.172726	4.91692	2.88339	0.0134558	0.149626	-2.59621	2.47147	0.0949434
ATXN7L3B	-0.265964	4.8217	-2.62859	0.0134726	0.14972	-2.92542	-2.47103	0.0950032
ADAM8	0.26481	1.95571	2.74643	0.0135358	0.150278	-2.50248	2.46935	0.0953571
KLHDC9	0.292587	2.76728	2.68094	0.0135394	0.150278	-2.6443	2.46926	0.0953571
HEXIM1	-0.267378	3.387	-2.61	0.0135564	0.150336	-2.8343	-2.46881	0.0953944
NLRC4	0.267774	2.43373	2.65694	0.0135614	0.150336	-2.69503	2.46868	0.0953944
SMARCA1	-0.108559	5.40297	-2.51685	0.013572	0.150361	-3.61058	-2.4684	0.0954098
TGFBR3L	0.754052	-0.747025	2.60134	0.0135822	0.150381	-2.92674	2.46813	0.0954227
ZNF140	-0.1156	3.78029	-2.51609	0.0135992	0.150477	-3.40831	-2.46768	0.0954834
SMPD1	0.249858	2.28759	2.51546	0.013622	0.150583	-3.12527	2.46708	0.0955509
POMZP3	0.241526	4.28427	2.67616	0.0136392	0.150583	-2.81772	2.46663	0.0955509
BCL9	-0.136647	4.76212	-2.8185	0.0136418	0.150583	-2.71929	-2.46656	0.0955509
SNX24	-0.0860705	5.47437	-2.5147	0.0136495	0.150583	-3.61699	-2.46636	0.0955509
AC018752.1	0.275341	2.79093	2.64835	0.0136506	0.150583	-2.7453	2.46633	0.0955509
FGF23	-0.673059	1.96048	-2.56024	0.0136747	0.150757	-2.8423	-2.4657	0.095661
CEP126	-0.159392	6.00867	-3.16058	0.0136854	0.150782	-1.99028	-2.46542	0.095677
PDZK1	0.263262	2.69477	2.51347	0.0136941	0.150786	-3.18863	2.46519	0.0956794
AC073270.2	0.364537	0.392928	2.51303	0.0137099	0.150868	-2.9635	2.46477	0.0957317
EFHB	0.411702	1.57588	2.63367	0.0137489	0.151037	-2.69081	2.46376	0.0958388
AC025871.1	0.225912	3.8056	2.57099	0.013764	0.151037	-2.92361	2.46336	0.0958388
MYO1F	0.415568	0.300043	3.03249	0.0137749	0.151037	-1.79457	2.46308	0.0958388
DHX30	0.0896487	5.4711	2.96253	0.0137772	0.151037	-2.37983	2.46302	0.0958388
ABI3BP	0.599581	5.5373	2.90082	0.0137802	0.151037	-2.37789	2.46294	0.0958388
ANKRD10-IT1	-0.252136	2.24039	-2.78137	0.0137819	0.151037	-2.41558	-2.4629	0.0958388
AC007448.4	0.515729	0.171661	2.62323	0.0137845	0.151037	-2.7492	2.46283	0.0958388
PCSK7	0.177056	5.94026	2.5421	0.0137924	0.151037	-3.14561	2.46263	0.0958388
DNAJC28	-0.283824	2.72821	-2.88708	0.0138202	0.151158	-2.28175	-2.4619	0.0959159
MED15	0.137216	5.60381	2.51921	0.0138203	0.151158	-3.13695	2.4619	0.0959159
ARRDC1	0.178516	5.32689	2.52349	0.0138836	0.151742	-3.11373	2.46026	0.0962863
AFTPH	-0.101349	6.35654	-2.59643	0.0138905	0.151742	-3.1294	-2.46008	0.0962863
SEMA3B	0.515919	0.0358464	2.50784	0.0138996	0.151749	-2.95203	2.45985	0.0962909
AC025043.1	0.239055	4.04674	2.56357	0.0139206	0.151789	-2.94392	2.4593	0.0963159
CASTOR1	-0.261738	0.33577	-2.50719	0.0139235	0.151789	-3.00801	-2.45923	0.0963159
ZBTB44-DT	0.280229	2.00579	2.66798	0.0139287	0.151789	-2.65929	2.4591	0.0963159
BAG2	-0.196779	4.34464	-2.92811	0.0139369	0.151789	-2.33372	-2.45888	0.0963159
C10orf88	-0.160267	4.64004	-2.74135	0.013955	0.151894	-2.78451	-2.45842	0.0963827
LINC01322	0.312863	3.37495	2.66869	0.0139839	0.152116	-2.76202	2.45768	0.0965234
NAF1	-0.17107	5.17052	-2.73106	0.0140118	0.152309	-2.85174	-2.45696	0.0966462
AC092118.1	0.244564	5.09994	2.58231	0.0140189	0.152309	-3.03326	2.45678	0.0966462
ANKRD9	0.437253	1.38654	2.71764	0.0140297	0.152309	-2.54137	2.4565	0.0966462
CSRNP2	-0.156791	3.44941	-2.50394	0.0140434	0.152309	-3.38402	-2.45615	0.0966462
POLN	0.323841	0.71986	2.50393	0.014044	0.152309	-3.00574	2.45614	0.0966462
AC078909.1	0.208556	4.40574	2.64755	0.0140616	0.152409	-2.89842	2.45569	0.0967095
OSER1-DT	0.222821	3.18076	2.75513	0.0140707	0.152416	-2.64458	2.45545	0.0967137
SPAG16	-0.169558	9.94721	-2.90133	0.0141324	0.152922	-2.78883	-2.45388	0.0970349
IQCB1	-0.146749	5.49755	-2.98781	0.0141344	0.152922	-2.35031	-2.45383	0.0970349
RBM26-AS1	0.338317	2.09337	2.64372	0.014168	0.153109	-2.71647	2.45298	0.0971537
HNRNPH3	-0.137454	6.28467	-2.65406	0.0141759	0.153109	-3.05585	-2.45277	0.0971537
TADA1	-0.100885	4.60305	-2.50035	0.0141772	0.153109	-3.55445	-2.45274	0.0971537
FBXO38	-0.119552	5.09693	-2.6867	0.0142146	0.15342	-2.99469	-2.45179	0.0973513
MYSM1	-0.0735289	5.69692	-2.49905	0.014226	0.153452	-3.68157	-2.4515	0.0973713
SLC35E2A	0.13905	4.25137	2.49879	0.0142359	0.153466	-3.46661	2.45126	0.0973804
HCG17	-0.167651	6.7685	-2.58716	0.0142754	0.1538	-3.21698	-2.45026	0.0975921
AC004147.3	0.652034	-0.117827	2.4999	0.0142865	0.153828	-3.087	2.44998	0.0976098
TRMT44	-0.185001	5.65961	-2.49557	0.0143572	0.154477	-3.70927	-2.4482	0.0980219
CTBP1-DT	-0.155373	2.7552	-2.776	0.014364	0.154477	-2.62497	-2.44803	0.0980219
ABCB8	0.19753	4.87252	2.54888	0.0143794	0.154551	-3.06431	2.44764	0.0980687
ZSCAN25	-0.15142	2.65572	-2.49469	0.0143906	0.154579	-3.28552	-2.44736	0.0980865
RBM12B	-0.163867	4.91469	-2.52923	0.0144074	0.154667	-3.08135	-2.44694	0.098142
ZNF665	0.204468	2.02675	2.49364	0.0144304	0.154676	-3.16043	2.44637	0.0981482
VRK3	0.117587	7.01172	2.49931	0.0144372	0.154676	-3.28034	2.4462	0.0981482
FAM185A	-0.12052	6.16289	-2.64495	0.0144582	0.154676	-3.09526	-2.44567	0.0981482
AL136038.5	0.199789	2.92428	2.8525	0.0144619	0.154676	-2.37317	2.44558	0.0981482
RORA-AS1	0.30922	8.11152	2.53099	0.0144701	0.154676	-3.33415	2.44538	0.0981482
SLC25A27	-0.156009	6.69179	-2.60402	0.0144733	0.154676	-3.20558	-2.4453	0.0981482
IQCA1	-0.222826	4.78961	-2.76197	0.0144912	0.154676	-2.80876	-2.44485	0.0981482
RC3H2	-0.114862	5.54819	-2.77765	0.0144951	0.154676	-2.85904	-2.44476	0.0981482
METTL25	-0.126074	6.41499	-2.65009	0.0145137	0.154676	-3.14758	-2.44429	0.0981482
LINC02234	-0.350178	0.205231	-2.49133	0.0145184	0.154676	-3.03736	-2.44417	0.0981482
CCDC57	0.164707	6.04822	2.54078	0.0145275	0.154676	-3.18818	2.44395	0.0981482
FAM217A	0.34953	2.96967	2.49507	0.0145301	0.154676	-2.99167	2.44388	0.0981482
AC004034.1	0.183348	3.35356	2.49102	0.0145302	0.154676	-3.3517	2.44388	0.0981482
AC131391.1	-0.447422	0.125737	-2.74643	0.0145386	0.154676	-2.44958	-2.44367	0.0981482
DCUN1D1	-0.107561	5.39204	-2.84378	0.0145405	0.154676	-2.76321	-2.44363	0.0981482
SHMT1	0.219156	2.9719	2.69347	0.0145528	0.154676	-2.65163	2.44332	0.0981482
AL158071.4	-0.281859	1.38585	-2.854	0.0145589	0.154676	-2.29412	-2.44317	0.0981482
PLA2G4E	0.276023	1.71131	2.77743	0.0145696	0.154676	-2.43242	2.4429	0.0981482
RSPH3	-0.102652	5.4136	-2.68038	0.014578	0.154676	-3.05352	-2.4427	0.0981482
TRPC1	-0.119646	8.09355	-2.64644	0.0145801	0.154676	-3.10968	-2.44264	0.0981482
FGD6	-0.140611	5.07025	-3.06846	0.0145955	0.154749	-2.09306	-2.44226	0.0981941
KCTD1	-0.160236	5.51765	-2.61103	0.0146522	0.155258	-3.1051	-2.44086	0.0985171
CARHSP1	0.240758	3.23029	2.65483	0.0146701	0.155356	-2.79113	2.44042	0.0985797
SLC25A40	-0.165759	4.97444	-2.82259	0.0147321	0.155921	-2.63283	-2.4389	0.0989382
AK4	0.757125	3.62861	2.48438	0.0147861	0.156401	-3.37806	2.43758	0.0992423
BCL7A	0.193143	4.25189	2.57278	0.0147956	0.156409	-2.96377	2.43734	0.0992478
AC018511.2	0.391617	1.49613	2.55969	0.0148045	0.156411	-2.84592	2.43713	0.0992492
RNF213	0.171931	7.55227	2.62977	0.0148313	0.156567	-3.20207	2.43647	0.099348
FAM102B	-0.140286	3.3077	-2.48308	0.0148366	0.156567	-3.39972	-2.43634	0.099348
TSC22D4	0.704889	0.917618	2.51179	0.0148682	0.156808	-2.95827	2.43557	0.099501
ADD3	-0.0911199	7.35885	-2.66608	0.0148788	0.156828	-3.23576	-2.43532	0.0995137
SOCS6	-0.160535	4.44182	-2.70086	0.0149042	0.157004	-2.83229	-2.4347	0.0996254
CEBPB-AS1	0.360638	-0.234911	2.48086	0.0149237	0.157118	-3.0076	2.43423	0.0996975
SCN1B	1.07364	0.905142	2.54885	0.0149463	0.157148	-2.86996	2.43368	0.0997166
C1orf54	0.262105	1.72167	2.47997	0.0149586	0.157148	-3.12145	2.43338	0.0997166
NPSR1	0.540718	0.233365	2.90024	0.0149621	0.157148	-2.1053	2.4333	0.0997166
GRAMD1C	-0.174523	7.47124	-2.73882	0.0149656	0.157148	-3.05922	-2.43321	0.0997166
SCRG1	0.323014	3.79135	2.57865	0.014978	0.157148	-2.94264	2.43291	0.0997166
STK38L	-0.147733	4.71763	-2.64293	0.0149789	0.157148	-2.97255	-2.43289	0.0997166
AC010809.2	-0.487632	-0.409113	-2.78881	0.0150086	0.157368	-2.35115	-2.43217	0.099856
KIAA1211	-0.189221	7.70589	-2.53932	0.0150463	0.157671	-3.35567	-2.43126	0.100048
GALNT10	0.278893	4.04266	2.51018	0.0150679	0.157788	-3.05264	2.43074	0.100122
ZEB2	0.905694	1.28526	2.56763	0.0150856	0.157788	-2.83768	2.43032	0.100122
KCNQ5	0.637549	-0.286015	2.60855	0.0150928	0.157788	-2.83813	2.43015	0.100122
MPHOSPH9	0.12794	7.43272	2.64077	0.0150943	0.157788	-3.14282	2.43011	0.100122
POLRMT	0.286334	2.96959	2.67374	0.0151013	0.157788	-2.64717	2.42994	0.100122
TMEM191B	0.72281	-0.368972	2.72178	0.0151176	0.157867	-2.51715	2.42955	0.100173
LINC01170	0.41219	4.41194	2.47516	0.0151484	0.158096	-3.56821	2.42881	0.100318
LY6G5B	-0.189559	2.16595	-2.47461	0.0151702	0.158197	-3.26834	-2.42829	0.100382
HFM1	-0.219207	4.32464	-2.47448	0.0151756	0.158197	-3.60301	-2.42816	0.100382
KCNN3	0.572787	2.41487	2.47399	0.0151951	0.158308	-3.23628	2.4277	0.100453
GPER1	0.368824	1.86306	2.51028	0.0152356	0.158572	-2.94192	2.42673	0.10062
AL031963.1	0.351633	1.27185	2.72059	0.015238	0.158572	-2.51934	2.42667	0.10062
RPGRIP1	0.139485	10.14	2.48923	0.0152632	0.158653	-3.49812	2.42607	0.100672
AL022328.4	0.354942	1.38109	2.59746	0.0152635	0.158653	-2.76598	2.42607	0.100672
GDAP2	-0.139623	4.96072	-2.66136	0.0152808	0.158653	-3.00882	-2.42565	0.100672
AL355073.2	-0.385786	0.567419	-2.70178	0.015281	0.158653	-2.54531	-2.42565	0.100672
SLX4	0.236332	3.31339	2.57391	0.0152964	0.158684	-2.88913	2.42528	0.100691
AC016727.1	0.235635	2.55265	2.58018	0.0153073	0.158684	-2.84324	2.42503	0.100691
GEM	0.293292	5.54914	2.6346	0.0153105	0.158684	-3.05467	2.42495	0.100691
PUM3	0.277561	8.67019	2.47056	0.015332	0.158816	-3.95857	2.42444	0.100775
AL731567.1	-0.40102	0.533343	-2.72762	0.0153534	0.158939	-2.49127	-2.42393	0.100853
MSL1	-0.130456	4.04892	-2.8616	0.0153616	0.158939	-2.50825	-2.42374	0.100853
DLG2	-0.127604	12.6092	-2.56705	0.0153764	0.158957	-3.58216	-2.42339	0.100865
PCDH11X	-0.477688	-0.188884	-2.46889	0.0153992	0.158957	-3.05886	-2.42285	0.100865
IGF2R	-0.133339	5.28445	-2.64022	0.0154023	0.158957	-3.07759	-2.42278	0.100865
KIFAP3	-0.108307	7.18001	-2.5715	0.0154254	0.158957	-3.3129	-2.42223	0.100865
SH2B3	0.262727	3.50426	2.46814	0.0154295	0.158957	-3.40468	2.42214	0.100865
AL023584.2	0.331748	2.59105	2.46825	0.0154389	0.158957	-3.03255	2.42192	0.100865
TBC1D9	-0.243766	3.6298	-2.61163	0.0154478	0.158957	-2.90705	-2.42171	0.100865
CNTN2	0.500534	-0.35336	2.66437	0.0154584	0.158957	-2.62705	2.42146	0.100865
TTL	-0.217875	2.90542	-2.94376	0.0154706	0.158957	-2.16736	-2.42117	0.100865
SEPTIN2	-0.136095	6.79429	-2.48315	0.0154716	0.158957	-3.3306	-2.42115	0.100865
AC091938.1	0.934158	0.0148397	2.57315	0.0154756	0.158957	-2.86287	2.42105	0.100865
AC011477.9	0.204009	3.46204	2.64708	0.0154795	0.158957	-2.83408	2.42096	0.100865
ZNF264	-0.148031	4.32817	-2.53593	0.0154836	0.158957	-3.0488	-2.42087	0.100865
AC011405.1	0.237014	4.73072	2.53578	0.0154926	0.158957	-3.11191	2.42066	0.100865
TAX1BP1	-0.10633	7.70747	-2.56147	0.0155096	0.158957	-3.34058	-2.42025	0.100865
SHC4	0.371188	-0.365875	2.466	0.015516	0.158957	-3.03038	2.42011	0.100865
DMXL2	-0.118531	6.66829	-2.56388	0.0155193	0.158957	-3.25334	-2.42003	0.100865
AL162231.1	0.414873	1.85413	2.53409	0.0155296	0.158957	-2.89595	2.41979	0.100865
GNAI3	0.252057	8.67146	2.62808	0.0155323	0.158957	-3.32616	2.41972	0.100865
AC091045.1	0.26463	3.53314	2.63672	0.0155399	0.158957	-2.98636	2.41955	0.100865
RBBP6	-0.159773	6.42318	-2.54519	0.0155588	0.15906	-3.23384	-2.4191	0.10093
AL139220.2	0.197732	4.1064	2.46435	0.015583	0.159217	-3.51177	2.41854	0.10103
G3BP1	-0.11495	5.50373	-2.70395	0.015598	0.159256	-2.98988	-2.41819	0.101054
AACS	-0.187647	4.74292	-2.51237	0.0156045	0.159256	-3.12302	-2.41804	0.101054
EFCAB12	-0.144382	3.26773	-2.46341	0.0156215	0.159314	-3.44882	-2.41764	0.101091
PPWD1	0.137627	5.51695	2.54454	0.0156279	0.159314	-3.1725	2.41749	0.101091
ADD2	-0.53791	3.59452	-2.4996	0.0156476	0.159425	-3.03619	-2.41703	0.101161
TRPM3	-0.281172	7.336	-2.55252	0.0156767	0.159471	-3.3183	-2.41636	0.101191
PRPH2	0.152461	8.87229	2.77604	0.0156874	0.159471	-3.05314	2.41611	0.101191
AC010894.3	0.229695	6.49749	2.55399	0.0156888	0.159471	-3.2724	2.41608	0.101191
OPA1	-0.107717	6.54608	-2.50984	0.0156949	0.159471	-3.32537	-2.41593	0.101191
HDHD5-AS1	0.279345	3.57144	2.68984	0.0156964	0.159471	-2.74237	2.4159	0.101191
AL589935.1	-0.225676	4.82367	-2.6066	0.0157067	0.159485	-3.11741	-2.41566	0.1012
AL158068.2	0.197461	3.6834	2.79796	0.0157323	0.159656	-2.62993	2.41507	0.101308
NUDT5	0.164281	4.8077	2.9333	0.0157413	0.159657	-2.36965	2.41486	0.101308
MIR2052HG	-0.386415	6.46843	-2.72337	0.0157854	0.160013	-3.12618	-2.41384	0.101535
TAS2R4	0.372241	0.221502	2.75291	0.0157978	0.16004	-2.43255	2.41355	0.101552
PDE5A	0.281571	8.71673	2.54252	0.0158151	0.16004	-3.44312	2.41315	0.101552
CARNMT1	-0.162272	6.187	-2.56802	0.0158157	0.16004	-3.23435	-2.41314	0.101552
CLCN2	-0.204334	1.7222	-2.4583	0.0158313	0.16004	-3.23789	-2.41278	0.101552
TMPRSS9	0.277435	2.13091	2.74135	0.0158377	0.16004	-2.52164	2.41263	0.101552
Z93930.2	0.199766	4.68731	2.56851	0.0158618	0.16004	-3.08142	2.41208	0.101552
TRIM66	0.2233	4.68689	2.5658	0.0158656	0.16004	-3.029	2.41199	0.101552
FRMD4B	0.140469	10.2664	2.5293	0.0158732	0.16004	-3.50856	2.41182	0.101552
SH3GL3	0.711687	1.22282	2.80157	0.0158818	0.16004	-2.35379	2.41162	0.101552
PTPN13	0.134258	10.013	2.53348	0.0158827	0.16004	-3.51232	2.4116	0.101552
STAU2	-0.116447	7.90519	-2.63005	0.0158858	0.16004	-3.3061	-2.41153	0.101552
GPD1	0.310405	1.97691	2.64972	0.0159029	0.160088	-2.75695	2.41114	0.101582
PPP4R4	-0.183771	8.97303	-2.58328	0.0159164	0.160088	-3.46193	-2.41083	0.101582
AIMP2	0.183435	4.36372	2.65664	0.0159182	0.160088	-2.89742	2.41079	0.101582
LINC02774	0.381374	0.834916	2.70192	0.0159276	0.160088	-2.57072	2.41057	0.101582
AL161717.1	0.470301	3.35557	2.62438	0.0159526	0.160088	-2.80984	2.41	0.101582
MMRN2	-0.328367	0.477568	-2.45504	0.0159662	0.160088	-3.12737	-2.40969	0.101582
P2RY14	0.794055	1.82468	2.51619	0.0159732	0.160088	-2.93019	2.40953	0.101582
AMT	0.161924	4.37928	2.63719	0.0159738	0.160088	-2.95184	2.40951	0.101582
TXNDC12	-0.147728	4.69207	-2.51356	0.015983	0.160088	-3.09883	-2.4093	0.101582
FABP12	0.132105	4.93245	2.70318	0.0159863	0.160088	-3.05617	2.40923	0.101582
FEZ1	0.305039	3.96881	2.51351	0.0160023	0.160088	-3.07256	2.40886	0.101582
DSCR8	0.226761	4.03814	2.45417	0.0160024	0.160088	-3.5001	2.40886	0.101582
C8orf76	-0.105063	4.37296	-2.79912	0.016009	0.160088	-2.75297	-2.40871	0.101582
CD72	0.296906	1.39055	2.45387	0.016015	0.160088	-3.15538	2.40857	0.101582
ELOVL2-AS1	0.255098	6.05896	2.78607	0.0160381	0.16023	-2.92735	2.40805	0.101672
AMZ1	0.266414	4.59058	2.46859	0.0160691	0.16045	-3.17892	2.40734	0.101812
NMRK1	0.153658	3.88572	2.4521	0.0160891	0.160561	-3.51421	2.40689	0.101882
ZNF658	-0.230367	2.99763	-2.53916	0.0161278	0.160858	-2.92926	-2.40601	0.102071
TICAM2	-0.311888	2.96129	-2.68404	0.0161674	0.161142	-2.65526	-2.40511	0.102251
OSBPL7	-0.178785	2.62475	-2.79287	0.0161742	0.161142	-2.52936	-2.40496	0.102251
KIAA1841	0.109571	6.86702	2.47037	0.0161865	0.161176	-3.36951	2.40468	0.102272
SERAC1	-0.170796	3.76382	-2.78232	0.0161969	0.16119	-2.56139	-2.40445	0.102282
PDLIM7	0.206278	4.19362	2.7206	0.0162204	0.161237	-2.71102	2.40392	0.102311
AC007663.3	0.412774	0.0197137	2.56314	0.0162322	0.161237	-2.86166	2.40365	0.102311
AC004825.3	0.290975	2.9507	2.45783	0.0162351	0.161237	-3.06974	2.40359	0.102311
LINC00519	-0.60737	2.24542	-2.55023	0.0162552	0.161237	-2.86997	-2.40313	0.102311
GTF2A2	-0.373764	4.95848	-2.48175	0.0162583	0.161237	-3.18909	-2.40306	0.102311
OR5P2	-0.907913	0.152071	-2.48563	0.0162599	0.161237	-3.05791	-2.40303	0.102311
CHST10	-0.210103	1.92331	-2.44794	0.0162643	0.161237	-3.30024	-2.40293	0.102311
SOHLH2	-0.289683	1.54278	-2.44718	0.0162965	0.161392	-3.236	-2.40221	0.10241
AC073575.2	-0.300744	0.373734	-2.44715	0.0162979	0.161392	-3.15646	-2.40217	0.10241
CEP170	-0.113609	5.82635	-2.53409	0.0163175	0.161401	-3.23725	-2.40174	0.102415
PNPLA8	-0.0985285	5.44901	-2.44666	0.0163183	0.161401	-3.77585	-2.40172	0.102415
AC068888.1	0.217858	4.92443	2.54174	0.0163347	0.161401	-3.1533	2.40135	0.102415
PARL	0.124737	6.23576	2.77981	0.0163362	0.161401	-2.84851	2.40132	0.102415
EMP3	0.526612	0.62374	2.55973	0.0163455	0.161401	-2.84538	2.40111	0.102415
KCNJ13	0.33177	2.58428	2.45625	0.0163574	0.161401	-3.06167	2.40084	0.102415
CCNA2	-0.216875	3.76515	-2.6004	0.0163615	0.161401	-2.95432	-2.40075	0.102415
GNAZ	-0.24647	3.21562	-2.49063	0.0163761	0.161429	-3.04784	-2.40042	0.102433
AC005253.1	0.32788	2.4328	2.65094	0.0163824	0.161429	-2.7405	2.40028	0.102433
FAM222A	-0.169624	6.24998	-2.52775	0.0163945	0.161429	-3.32309	-2.40001	0.102433
RHPN1	0.251752	3.48414	3.13082	0.0164003	0.161429	-1.74238	2.39988	0.102433
GOLGA8M	0.486982	0.134367	2.60805	0.0164611	0.161939	-2.78355	2.39853	0.102757
FAM106C	0.768735	0.466924	2.48564	0.0164856	0.162091	-3.03534	2.39798	0.102853
PROCR	0.526425	3.51177	2.62097	0.0164962	0.162108	-2.85616	2.39775	0.102864
ANKRD20A4	-0.399576	1.27344	-2.6804	0.0165101	0.162156	-2.62421	-2.39744	0.102894
SPAG7	-0.196448	4.84123	-2.44917	0.0165538	0.162431	-3.22111	-2.39647	0.103069
LRRC49	-0.128356	6.89167	-2.77339	0.0165631	0.162431	-2.99506	-2.39627	0.103069
GAS1RR	-0.231754	1.95434	-2.44074	0.0165716	0.162431	-3.3385	-2.39608	0.103069
BICDL1	0.138922	9.16702	2.53074	0.0165742	0.162431	-3.47181	2.39602	0.103069
RIOK2	-0.169444	4.23415	-2.8385	0.0165846	0.162444	-2.59844	-2.39579	0.103077
GTPBP2	0.162905	5.04626	2.47509	0.0165936	0.162444	-3.21974	2.39559	0.103077
SREBF2	0.250843	6.84121	2.56293	0.0166099	0.162515	-3.29348	2.39523	0.103122
TYW1	0.118861	6.76378	2.6075	0.0166192	0.162518	-3.23621	2.39503	0.103124
NDUFS3	-0.251198	4.5114	-2.44425	0.0166351	0.162585	-3.19205	-2.39468	0.103166
AC079305.3	0.193063	2.21923	2.4388	0.0166553	0.162694	-3.29714	2.39423	0.103236
GATM	0.522089	0.352046	2.51693	0.0166817	0.162863	-2.95068	2.39365	0.103343
LINC02012	-0.381255	0.310404	-2.91513	0.0166949	0.162904	-2.07504	-2.39336	0.103369
DZIP3	-0.114738	9.4362	-2.57334	0.016738	0.163237	-3.50145	-2.39241	0.10358
ADAMTS3	-0.168893	8.50089	-2.55384	0.0167656	0.163384	-3.47514	-2.39181	0.103673
TTC3-AS1	0.273875	4.42511	2.48155	0.0167723	0.163384	-3.17449	2.39166	0.103673
PPFIA4	0.646995	3.22021	2.43591	0.0167804	0.163384	-3.42578	2.39149	0.103673
ZMYND8	0.110941	8.62212	2.46115	0.01679	0.16339	-3.51574	2.39127	0.103677
GID8	0.160956	4.2459	2.54826	0.0168283	0.163674	-3.09407	2.39044	0.103857
AGFG1	-0.0766331	6.30087	-2.43456	0.0168393	0.163692	-3.8924	-2.3902	0.103869
DLGAP3	-0.19961	3.56322	-2.51912	0.0168597	0.163802	-3.03683	-2.38975	0.103939
SDC4	-0.39289	3.95617	-2.49819	0.0168775	0.163887	-3.08306	-2.38936	0.103993
CEP170B	0.254522	6.46937	2.48644	0.0168949	0.163967	-3.3331	2.38899	0.104043
TAF5L	-0.178045	4.45157	-2.72327	0.0169072	0.163998	-2.72465	-2.38872	0.104063
PSMA3-AS1	0.0878393	6.1918	2.67191	0.0169179	0.164013	-3.15718	2.38849	0.104073
TMEM63C	0.272594	3.06829	2.46168	0.0169403	0.164142	-3.07673	2.388	0.104155
CASP10	0.932465	0.853854	2.43196	0.0169531	0.164178	-3.13528	2.38772	0.104177
ZFP69	0.242315	1.92514	2.58878	0.0169974	0.164519	-2.87704	2.38676	0.104393
TMEM147-AS1	0.218756	2.3583	2.63551	0.0170085	0.164537	-2.79143	2.38652	0.104405
USP35	-0.286729	1.26734	-2.85881	0.0170316	0.164672	-2.20514	-2.38603	0.104491
MOB2	-0.140276	3.58866	-2.42962	0.0170561	0.164795	-3.57721	-2.3855	0.104569
ATAD2	0.294581	1.64332	2.67527	0.0170626	0.164795	-2.61136	2.38536	0.104569
AL031289.1	0.283578	1.37529	2.42867	0.017098	0.165049	-3.22345	2.38459	0.10473
TIGD4	-0.218826	5.69372	-2.43426	0.0171148	0.165122	-3.32442	-2.38423	0.104776
CFAP69	-0.114746	6.64428	-2.55254	0.0171307	0.165187	-3.37292	-2.38389	0.104818
BLMH	-0.10832	4.01526	-2.42684	0.0171793	0.165567	-3.63501	-2.38285	0.105059
LUCAT1	0.287609	6.36425	2.42958	0.0172312	0.165969	-3.39174	2.38174	0.105314
FAM117B	-0.129923	5.76075	-2.95087	0.0172399	0.165969	-2.51701	-2.38155	0.105314
MED21	0.116505	4.59918	2.42528	0.0172487	0.165969	-3.67729	2.38136	0.105314
XRN1	-0.100409	7.74884	-2.60017	0.0172699	0.166084	-3.43652	-2.38091	0.105387
PAN2	-0.147064	4.38386	-2.8635	0.0172858	0.1661	-2.61439	-2.38057	0.105397
PERP	-0.315346	2.98011	-2.4682	0.017295	0.1661	-3.06195	-2.38038	0.105397
AC107072.2	0.247996	6.76274	2.43587	0.0173067	0.1661	-3.42533	2.38013	0.105397
CLEC2L	0.82458	0.332545	2.49698	0.0173145	0.1661	-2.99232	2.37996	0.105397
SRPK1	-0.0790257	5.76121	-2.42373	0.0173177	0.1661	-3.85683	-2.37989	0.105397
FAM91A1	-0.148336	4.56089	-2.80535	0.0173845	0.166594	-2.61414	-2.37847	0.10571
CLIC4	-0.124193	5.61755	-2.69398	0.0173876	0.166594	-3.19087	-2.37841	0.10571
RARA-AS1	-0.404985	1.17485	-2.49322	0.0174005	0.166629	-2.97577	-2.37813	0.105732
ZNF397	0.11603	5.21936	2.84335	0.0174154	0.166682	-2.61792	2.37782	0.105766
SOCS5	-0.332487	2.30509	-2.48207	0.0174284	0.166694	-3.01805	-2.37754	0.105774
RNASEL	0.256188	2.86896	2.54103	0.0174352	0.166694	-2.94979	2.3774	0.105774
SIKE1	-0.187212	3.9781	-2.46054	0.0174542	0.166711	-3.15618	-2.377	0.105785
PIGW	0.25198	1.06236	2.42067	0.0174555	0.166711	-3.20317	2.37697	0.105785
AP000866.6	-0.347658	0.0306926	-2.5959	0.0174749	0.166793	-2.77366	-2.37656	0.105837
AC106793.1	-0.302976	4.88734	-2.58567	0.0174826	0.166793	-3.16736	-2.3764	0.105837
SLC9A9	-0.275486	4.83152	-2.59544	0.0175038	0.166907	-3.17914	-2.37595	0.105909
MKRN2OS	0.200079	4.33502	2.52141	0.017539	0.167155	-3.14796	2.37521	0.106066
AC079336.4	0.281733	1.78817	2.67274	0.017552	0.16719	-2.68894	2.37494	0.106088
KIAA1257	0.191117	3.87984	2.61918	0.017615	0.167451	-3.01518	2.37361	0.106254
FAM122B	-0.123591	3.24502	-2.41681	0.0176299	0.167451	-3.53786	-2.3733	0.106254
AL162388.2	-0.730673	-0.255801	-2.67023	0.01763	0.167451	-2.67569	-2.3733	0.106254
SLC29A4	0.754286	3.62513	2.4168	0.0176306	0.167451	-3.50355	2.37329	0.106254
SLC25A43	0.520908	0.894751	2.60395	0.0176426	0.167451	-2.77095	2.37303	0.106254
MIR3976HG	-0.196658	8.58738	-2.41652	0.0176434	0.167451	-4.11774	-2.37302	0.106254
AL021155.5	0.406389	0.225577	2.41649	0.0176445	0.167451	-3.13488	2.373	0.106254
PPIH	0.132904	4.21834	2.84633	0.0176716	0.16761	-2.44599	2.37243	0.106355
AL160269.1	-0.402452	-0.0457477	-2.63864	0.0176844	0.16761	-2.67965	-2.37216	0.106355
YTHDF3	-0.0785116	5.56592	-2.41551	0.0176892	0.16761	-3.85728	-2.37206	0.106355
DGKZ	0.297778	2.88376	2.47565	0.017747	0.16798	-3.05638	2.37085	0.10659
INIP	0.133931	4.22096	2.51978	0.0177492	0.16798	-3.15596	2.37081	0.10659
C2CD5	-0.130546	7.49666	-2.5569	0.0177563	0.16798	-3.41616	-2.37066	0.10659
DCT	0.406509	3.31	2.53248	0.0178185	0.16848	-3.04754	2.36937	0.106907
PCDH11Y	-0.410471	0.342553	-2.41237	0.0178327	0.168526	-3.20815	-2.36907	0.106936
COQ5	0.119465	3.93827	2.92193	0.0178453	0.168557	-2.33304	2.36881	0.106956
ACKR2	0.32072	1.21633	2.62278	0.0178838	0.168734	-2.7202	2.36802	0.107068
APOLD1	0.46895	0.509145	2.41119	0.017887	0.168734	-3.16237	2.36795	0.107068
DNPEP	0.12252	4.03967	2.41098	0.0178968	0.168734	-3.63411	2.36775	0.107068
AC105052.5	-0.134976	4.77012	-2.41071	0.0179095	0.168734	-3.78192	-2.36748	0.107068
LCA5	-0.120564	6.12948	-2.57716	0.0179156	0.168734	-3.27653	-2.36736	0.107068
RHBDD2	0.159108	3.67034	2.41047	0.0179203	0.168734	-3.54947	2.36726	0.107068
ZFP2	0.136753	4.23054	2.59052	0.0179363	0.168759	-3.10539	2.36693	0.107084
MT-ND6	0.941461	0.623734	2.41708	0.0179417	0.168759	-3.13389	2.36682	0.107084
AP005671.1	-0.416652	0.663375	-2.52238	0.017975	0.168947	-2.91797	-2.36613	0.107203
AL731577.2	-0.1382	5.95526	-2.67851	0.0179865	0.168947	-3.07764	-2.3659	0.107203
CEP89	0.116639	5.89583	2.42236	0.0179976	0.168947	-3.39506	2.36567	0.107203
ATP5F1A	-0.208455	6.7324	-2.41554	0.018004	0.168947	-3.4547	-2.36554	0.107203
TDRD3	-0.103788	6.62934	-2.58016	0.0180086	0.168947	-3.32472	-2.36544	0.107203
AC016831.7	-0.207567	5.05107	-2.41244	0.0180446	0.169126	-3.31709	-2.3647	0.107317
MAP2K4	-0.109354	6.73257	-2.54278	0.0180465	0.169126	-3.39588	-2.36466	0.107317
OMG	0.274869	5.26584	2.4973	0.0180994	0.169453	-3.26406	2.36358	0.107525
EPHA5	0.831332	0.614251	2.5532	0.0181003	0.169453	-2.86186	2.36356	0.107525
SECISBP2L	-0.117115	5.73008	-2.52605	0.018114	0.169494	-3.28619	-2.36328	0.107551
METTL27	0.387819	0.373223	2.52531	0.0181344	0.169597	-2.91371	2.36286	0.107616
MOSPD2	-0.120929	3.2017	-2.40493	0.0181776	0.169868	-3.56229	-2.36198	0.107788
MAN1A2	-0.136348	6.65507	-2.49624	0.0181823	0.169868	-3.43148	-2.36189	0.107788
NKAPL	-0.301528	5.12003	-2.51099	0.0182024	0.169968	-3.23042	-2.36148	0.107851
FAM50A	0.18464	4.4513	2.73107	0.0182224	0.17	-2.79382	2.36107	0.107872
SNX30	-0.169302	3.95973	-2.68348	0.0182248	0.17	-2.80365	-2.36102	0.107872
AP003472.2	0.324588	1.91596	2.40349	0.0182448	0.170099	-3.3561	2.36061	0.107935
NAT8L	0.601794	0.140667	2.47363	0.018268	0.170152	-3.05739	2.36014	0.107968
SSTR2	0.376853	-0.237546	2.40292	0.0182716	0.170152	-3.15563	2.36007	0.107968
CPLX2	0.515409	1.51632	2.46178	0.0182832	0.170152	-3.0367	2.35983	0.107968
AL035420.1	0.297071	1.67601	2.40257	0.0182882	0.170152	-3.29672	2.35973	0.107968
GORAB	-0.156569	3.31671	-2.40229	0.0183012	0.170184	-3.59353	-2.35947	0.107988
LIN7C	-0.241041	5.16105	-2.44234	0.0183671	0.170709	-3.30379	-2.35813	0.108322
UHMK1	-0.0872255	4.63364	-2.39987	0.0184154	0.171069	-3.77817	-2.35716	0.10855
FAIM2	0.681947	2.11773	2.44978	0.0184252	0.171072	-3.06634	2.35696	0.108552
BCL9L	-0.221229	2.14979	-3.07235	0.0184417	0.171137	-1.75633	-2.35663	0.108593
CA5B	0.13497	5.24774	2.4293	0.0184565	0.171186	-3.33582	2.35633	0.108624
LMO7-AS1	0.32349	3.1591	2.48205	0.0184811	0.171247	-3.07099	2.35584	0.108663
FYCO1	-0.106248	6.42363	-2.51295	0.018482	0.171247	-3.43185	-2.35582	0.108663
GON7	-0.213692	4.41681	-2.44319	0.0185074	0.171393	-3.23977	-2.35531	0.108756
TRAF6	-0.155684	3.50826	-2.64147	0.0185282	0.171413	-2.91962	-2.35489	0.108768
GPM6B	0.147583	7.62108	2.60541	0.0185358	0.171413	-3.40495	2.35474	0.108768
AL139011.1	0.21957	1.15693	2.39728	0.0185381	0.171413	-3.27346	2.35469	0.108768
INHA	0.364243	0.300961	2.39678	0.0185617	0.171543	-3.19372	2.35422	0.108851
BIRC6-AS1	0.565016	-0.150887	2.40943	0.0185984	0.171794	-3.23692	2.35348	0.10901
AL606491.1	0.241913	1.34559	2.39565	0.0186157	0.171866	-3.29398	2.35314	0.109056
TMEM14B	0.247331	9.14554	2.51955	0.0186285	0.171896	-3.53472	2.35288	0.109075
CFAP100	0.204634	4.39688	2.39305	0.0187402	0.172838	-3.69898	2.35066	0.109673
CSRP2	0.658747	0.934289	2.43935	0.0187595	0.172927	-3.08666	2.35028	0.109729
AL158832.1	0.356966	2.99585	2.49292	0.0188131	0.173192	-3.09337	2.34921	0.109897
HMGN1	0.188343	8.39461	2.47953	0.0188187	0.173192	-3.56712	2.3491	0.109897
AC073349.4	0.238893	4.08915	2.53697	0.0188259	0.173192	-3.10044	2.34896	0.109897
ACAA2	-0.418242	4.89034	-2.56125	0.0188267	0.173192	-3.17558	-2.34895	0.109897
ARG2	-0.195066	5.72626	-2.44501	0.0188436	0.173259	-3.36145	-2.34861	0.10994
INAFM1	0.147748	4.10727	2.38994	0.01889	0.173597	-3.71482	2.3477	0.110154
REST	-0.117849	5.57742	-2.492	0.018913	0.173676	-3.34004	-2.34724	0.110204
CRIPT	0.140829	5.41093	2.72386	0.0189179	0.173676	-3.03174	2.34714	0.110204
HERC5	-0.223857	1.86721	-2.38852	0.0189587	0.173962	-3.4556	-2.34634	0.110386
TMEM204	0.347345	2.0992	2.44591	0.0189735	0.173983	-3.0747	2.34605	0.110399
GRHL1	-0.151747	5.43743	-2.53514	0.0189929	0.173983	-3.33247	-2.34567	0.110399
MBD2	-0.142079	4.78469	-2.58879	0.0190042	0.173983	-3.14569	-2.34545	0.110399
H2AFX	-0.44457	3.87372	-2.40524	0.0190088	0.173983	-3.2416	-2.34536	0.110399
AC004147.5	0.357813	2.10013	2.38748	0.0190093	0.173983	-3.38142	2.34535	0.110399
AL078621.4	0.254082	1.40581	2.54781	0.0190563	0.174267	-2.9163	2.34443	0.110579
RFLNB	0.572369	1.05171	2.38644	0.0190597	0.174267	-3.26578	2.34436	0.110579
TMCO4	0.288534	3.71835	2.38556	0.0191028	0.174546	-3.63095	2.34352	0.110756
AC019205.1	0.134937	4.79531	2.51425	0.0191096	0.174546	-3.22103	2.34339	0.110756
AL583810.2	-0.370093	0.251121	-2.65388	0.0191305	0.174648	-2.64686	-2.34298	0.110821
TMEM74B	0.943251	0.447515	2.4588	0.0191799	0.174957	-3.06113	2.34202	0.111017
IFNAR1	-0.139979	5.24705	-2.57739	0.0191867	0.174957	-3.1147	-2.34188	0.111017
MAP3K20	0.621615	-0.442222	2.42742	0.0191962	0.174957	-3.20568	2.3417	0.111017
STK4	-0.0790281	5.55803	-2.38351	0.0192032	0.174957	-3.93029	-2.34156	0.111017
AC015726.1	-0.26217	-0.126178	-2.38302	0.0192272	0.175087	-3.23527	-2.3411	0.1111
DCAF15	0.231509	3.54786	2.52307	0.0192476	0.175184	-3.09834	2.3407	0.111161
AL080317.1	-0.295576	1.90825	-2.48543	0.019283	0.175418	-2.99896	-2.34001	0.111309
AC073389.2	0.32518	1.34557	2.4561	0.0193529	0.175805	-3.04785	2.33866	0.111555
AP002336.2	0.197729	6.22255	2.47383	0.0193589	0.175805	-3.43746	2.33855	0.111555
TCF4-AS1	0.273049	4.33597	2.41108	0.0193618	0.175805	-3.29096	2.33849	0.111555
AL163952.1	-0.322573	2.30586	-2.38004	0.019374	0.175805	-3.51482	-2.33825	0.111555
SEC23B	-0.140615	5.12536	-2.62682	0.0193774	0.175805	-3.04128	-2.33819	0.111555
AL390242.1	0.223042	4.83707	2.4862	0.0193893	0.175805	-3.28428	2.33796	0.111555
SLC47A2	0.390946	0.321428	2.53292	0.019394	0.175805	-2.89686	2.33787	0.111555
B4GALNT3	-0.333241	1.37502	-3.0221	0.0194444	0.176174	-1.86037	-2.3369	0.111789
NSFL1C	0.190947	5.31877	2.68647	0.0194598	0.176224	-3.15667	2.3366	0.111821
STX16	0.128335	6.38351	2.43698	0.0195143	0.176565	-3.4909	2.33556	0.112037
ENKD1	0.163368	2.65357	2.37702	0.0195237	0.176565	-3.51404	2.33538	0.112037
AL513188.1	0.290834	4.18327	2.43646	0.0195268	0.176565	-3.25235	2.33532	0.112037
PRPH	0.947004	0.0682969	2.50807	0.0195618	0.176793	-2.94681	2.33465	0.112182
NUDT2	0.113061	4.49752	2.37589	0.01958	0.176868	-3.77252	2.3343	0.11223
AC107993.1	-0.164882	1.99871	-2.37563	0.019593	0.176897	-3.45684	-2.33405	0.112248
AL353784.1	0.354531	9.07512	2.39478	0.0196063	0.176928	-3.66611	2.3338	0.112268
CDC42SE1	0.180808	4.16166	2.51101	0.0196344	0.177063	-3.22889	2.33326	0.112353
GLB1L	0.172792	2.32353	2.37468	0.0196409	0.177063	-3.46707	2.33314	0.112353
AC097382.2	-0.300693	-0.257373	-2.37426	0.0196614	0.17716	-3.24397	-2.33275	0.112415
EIF3J-DT	0.157769	4.43789	2.54651	0.0196948	0.177306	-3.16377	2.33211	0.112508
[truncated: 16,004 more rows]

## Sheet: BC aging DEG
	logFC	AveExpr	t	P.Value	adj.P.Val	B	z.std	qval
ZNF326	-0.22288	7.57123	-7.16877	8.63592e-11	1.27492e-06	14.2664	-6.48909	7.11309e-07
FNIP1	-0.180379	7.13559	-7.06966	1.41635e-10	1.27492e-06	13.7899	-6.41412	7.11309e-07
FMR1	-0.190013	5.32215	-6.89759	3.32421e-10	1.55609e-06	12.9712	-6.28285	8.68176e-07
AC005697.2	0.537774	1.55585	6.88963	3.4574e-10	1.55609e-06	12.0459	6.27674	8.68176e-07
CNOT6	-0.163929	5.73981	-6.05244	1.94186e-08	6.45338e-05	9.06871	-5.6171	3.60049e-05
ELP1	-0.137657	5.92661	-6.03057	2.15077e-08	6.45338e-05	8.96934	-5.59941	3.60049e-05
IL1RAPL1	-0.414497	4.40275	-5.91862	3.61909e-08	9.30779e-05	8.48971	-5.5085	5.19303e-05
PTPN7	0.554653	0.780567	5.88372	4.25248e-08	9.56967e-05	7.48096	5.48003	5.33913e-05
AC090518.1	-0.36345	2.12295	-5.79732	6.32687e-08	0.00012052	7.87876	-5.40931	6.72409e-05
AC010175.1	-0.319532	0.367841	-5.78499	6.69445e-08	0.00012052	7.45447	-5.39918	6.72409e-05
CINP	0.173913	3.84571	5.73291	8.49217e-08	0.000138986	7.68318	5.35635	7.75434e-05
AC005040.2	-1.53157	2.72517	-5.65645	1.20182e-07	0.000180302	7.36547	-5.29322	0.000100595
PINX1	-0.190645	3.85105	-5.41675	3.51532e-07	0.000486818	6.35543	-5.09349	0.000271607
NAGA	0.298264	1.57551	5.3907	3.94434e-07	0.000507214	6.01445	5.07162	0.000282986
CNOT2	-0.1366	7.3264	-5.34713	4.77912e-07	0.000550592	5.98821	-5.03497	0.000307188
PRRC2C	-0.160469	7.65504	-5.34176	4.89333e-07	0.000550592	5.96333	-5.03045	0.000307188
LRCH2	-0.234	5.25009	-5.29001	6.13923e-07	0.000616666	5.78113	-4.98678	0.000344052
TCEA3	0.938466	2.07294	5.27444	6.57136e-07	0.000616666	5.58783	4.97362	0.000344052
PHF3	-0.170073	7.2432	-5.26762	6.76991e-07	0.000616666	5.65717	-4.96785	0.000344052
EIF2AK3	-0.205296	6.11355	-5.2649	6.85071e-07	0.000616666	5.65746	-4.96555	0.000344052
NPAT	-0.163966	5.20511	-5.24708	7.40344e-07	0.000634686	5.6093	-4.95047	0.000354106
STAM	-0.12989	5.52529	-5.22791	8.04695e-07	0.000658497	5.52187	-4.93423	0.00036739
ACVR2B	-0.210145	4.39232	-5.21428	8.53772e-07	0.000668281	5.49745	-4.92266	0.000372849
PIK3CA	-0.192104	6.34821	-5.17959	9.92119e-07	0.000715233	5.30374	-4.8932	0.000399044
NYAP1	0.226107	2.91893	5.17794	9.99226e-07	0.000715233	5.34853	4.89179	0.000399044
TSHZ2	-0.653089	4.84529	-5.28795	1.03294e-06	0.000715233	5.64864	-4.88526	0.000399044
METTL14	-0.112849	5.05483	-5.15633	1.09689e-06	0.000720198	5.2447	-4.87341	0.000401815
KAT6A	-0.198872	7.28368	-6.21327	1.13608e-06	0.000720198	9.74034	-4.86647	0.000401815
PROSER1	-0.135074	3.69623	-5.13518	1.20146e-06	0.000720198	5.20273	-4.8554	0.000401815
AJ239328.1	-0.436178	2.86201	-5.13476	1.20367e-06	0.000720198	5.2099	-4.85503	0.000401815
HYI	0.319222	3.14553	5.12781	1.24013e-06	0.000720198	5.16089	4.84912	0.000401815
BEAN1	0.363608	3.47339	5.08964	1.46076e-06	0.00081437	5.02634	4.81653	0.000454355
ADAM10	-0.125906	6.34283	-5.08416	1.4954e-06	0.00081437	4.91333	-4.81185	0.000454355
EMSY	-0.150032	6.46564	-5.07042	1.58582e-06	0.00081437	4.85419	-4.80011	0.000454355
GTF2H4	0.258436	3.18337	5.06551	1.61942e-06	0.00081437	4.92216	4.7959	0.000454355
SCN3A	-0.262686	3.58918	-5.06421	1.62847e-06	0.00081437	4.9223	-4.79479	0.000454355
ANKRD12	-0.19904	9.0377	-5.05254	1.71154e-06	0.00083278	4.7693	-4.7848	0.000464627
LCORL	-0.234723	6.31336	-5.90793	1.78227e-06	0.000844374	8.37116	-4.77666	0.000471096
Z82195.3	-0.63656	-0.313655	-5.03662	1.83159e-06	0.000845489	4.4588	-4.77117	0.000471717
MFAP3L	-0.195309	5.07582	-5.02497	1.92464e-06	0.000866233	4.71212	-4.76118	0.000483291
HUWE1	-0.0881462	6.95255	-5.01603	1.99912e-06	0.000877808	4.62886	-4.75351	0.000489749
SWI5	0.153116	5.10954	5.00493	2.09548e-06	0.000898213	4.65404	4.74399	0.000501133
FAM106A	-0.667801	4.60104	-5.18134	2.46109e-06	0.0010304	5.2295	-4.71133	0.000574881
TTPAL	0.225831	3.93649	4.91114	3.11198e-06	0.00124779	4.32715	4.66329	0.00069617
ATG16L1	-0.146167	3.81607	-4.91061	3.11895e-06	0.00124779	4.308	-4.66283	0.00069617
HACE1	-0.176784	5.92603	-4.90199	3.23366e-06	0.00126556	4.18757	-4.65539	0.000706082
AL163952.1	-0.477652	0.379463	-4.89672	3.30586e-06	0.00126629	4.05255	-4.65084	0.00070649
ZNF675	-0.221782	4.2872	-4.87515	3.61785e-06	0.00135692	4.14197	-4.63221	0.000757057
AGTPBP1	-0.174304	7.71648	-5.2748	3.71518e-06	0.00136499	5.71798	-4.62671	0.000761558
BLZF1	-0.139108	5.10886	-4.84893	4.03589e-06	0.00144068	4.01258	-4.60953	0.000803789
EWSR1	-0.123739	6.09336	-4.84624	4.08125e-06	0.00144068	3.96672	-4.6072	0.000803789
AKAP9	-0.161008	8.08556	-4.79874	4.97039e-06	0.0016432	3.75402	-4.56603	0.000916779
HELZ	-0.135907	7.2265	-4.79673	5.01193e-06	0.0016432	3.75293	-4.56429	0.000916779
HECTD2	-0.156057	6.32372	-4.79009	5.15152e-06	0.0016432	3.73854	-4.55852	0.000916779
RMND5A	-0.151671	5.31556	-4.78933	5.16761e-06	0.0016432	3.76646	-4.55787	0.000916779
UBAP2L	-0.1169	4.98575	-4.7877	5.20261e-06	0.0016432	3.77226	-4.55645	0.000916779
SLC2A6	0.290831	3.09038	4.78584	5.24277e-06	0.0016432	3.84438	4.55483	0.000916779
WDR88	0.224606	3.30733	4.78349	5.29388e-06	0.0016432	3.84002	4.55279	0.000916779
FASTK	0.242243	4.1968	4.76747	5.65555e-06	0.00172571	3.76367	4.53887	0.000962812
TAC4	0.319224	3.45436	4.75071	6.0598e-06	0.00181824	3.71585	4.52429	0.00101444
TRMT1	0.233566	3.19996	4.73022	6.59194e-06	0.00194549	3.63798	4.50646	0.00108543
THOC2	-0.13224	6.88461	-4.71358	7.05719e-06	0.00200066	3.43166	-4.49196	0.00111621
AC105339.3	0.315097	3.43394	4.70963	7.17219e-06	0.00200066	3.56088	4.48851	0.00111621
LINC02696	0.285316	2.63216	4.70669	7.25907e-06	0.00200066	3.52964	4.48595	0.00111621
IDNK	0.199628	4.44412	4.70649	7.26481e-06	0.00200066	3.51458	4.48578	0.00111621
PDS5B	-0.166003	7.29208	-4.70138	7.41835e-06	0.00200066	3.38029	-4.48132	0.00111621
DHX9	-0.155908	6.63341	-5.44006	7.44564e-06	0.00200066	6.40547	-4.48053	0.00111621
GMPS	-0.0961613	5.22962	-4.68518	7.92561e-06	0.00209831	3.36736	-4.46718	0.00117069
VPS37A	-0.164596	5.54252	-4.83518	8.49118e-06	0.00221546	3.97648	-4.45241	0.00123606
MINPP1	-0.133933	4.54929	-4.64601	9.29503e-06	0.00239055	3.25488	-4.43296	0.00133374
ZNF143	-0.151855	4.55001	-4.63385	9.76487e-06	0.00247601	3.20119	-4.42232	0.00138142
RICTOR	-0.200819	7.39358	-5.44747	1.0227e-05	0.00251009	6.43236	-4.41232	0.00140043
PRPF40A	-0.141282	6.44053	-5.36639	1.02484e-05	0.00251009	6.10238	-4.41186	0.00140043
PSG8	0.596656	5.35751	4.75543	1.03175e-05	0.00251009	3.6581	4.41041	0.00140043
RYK	-0.153	6.08304	-6.15055	1.06633e-05	0.00255962	9.49567	-4.40327	0.00142807
2023-03-07	-0.150094	6.46475	-5.18306	1.14765e-05	0.00265039	5.35404	-4.3873	0.00147871
CYBC1	0.206541	3.27899	4.59383	1.14795e-05	0.00265039	3.13035	4.38725	0.00147871
KHDRBS2-OT	-0.190996	5.78438	-4.5917	1.15785e-05	0.00265039	2.98496	-4.38538	0.00147871
USH2A	-0.65249	4.28887	-4.82516	1.17369e-05	0.00265039	3.8993	-4.38242	0.00147871
AL627171.1	0.299743	1.68372	4.58442	1.19233e-05	0.00265039	2.98524	4.37899	0.00147871
ACADVL	0.215814	4.74895	4.58439	1.19248e-05	0.00265039	3.04167	4.37896	0.00147871
ARG2	0.277232	4.07996	4.58032	1.21217e-05	0.0026613	3.06664	4.37539	0.0014848
LINC00640	-0.46991	0.258098	-4.56939	1.26662e-05	0.00274736	2.87594	-4.36579	0.00153281
UEVLD	0.181029	4.52835	4.56451	1.2917e-05	0.00275756	2.96718	4.36151	0.00153851
FAM214A	-0.211917	6.02029	-5.76136	1.30196e-05	0.00275756	7.74729	-4.35977	0.00153851
AC136604.2	0.410114	2.88005	5.31425	1.32728e-05	0.00276562	5.67676	4.35556	0.001543
XAB2	0.236985	3.63638	4.55602	1.3365e-05	0.00276562	2.98741	4.35404	0.001543
PCLO	-0.217077	8.80736	-5.06901	1.38072e-05	0.00282467	4.88822	-4.34691	0.00157594
MICU3	-0.153939	7.28406	-5.09779	1.41516e-05	0.00286259	5.01287	-4.3415	0.0015971
ITCH-AS1	0.459904	0.771554	4.53173	1.47301e-05	0.00294651	2.71959	4.33269	0.00164392
ALS2	-0.1733	5.35979	-6.39602	1.52827e-05	0.00302345	10.6143	-4.32457	0.00168685
MOSPD2	-0.138521	4.01482	-4.51957	1.54635e-05	0.00302597	2.80692	-4.32198	0.00168826
IQUB	-0.316644	2.71845	-4.50391	1.64598e-05	0.00318629	2.79784	-4.30819	0.00177771
GCAT	0.213156	2.99695	4.49317	1.71782e-05	0.00328998	2.76307	4.29873	0.00183555
SSH3	0.463475	0.415108	5.22757	1.80766e-05	0.00342562	4.92225	4.28741	0.00191123
PSG6	0.52639	2.74912	4.55369	1.87436e-05	0.00347664	2.64835	4.27935	0.00193969
TAB2	-0.186184	6.15479	-4.73047	1.88709e-05	0.00347664	3.59968	-4.27785	0.00193969
LRFN4	0.351082	2.11132	4.46878	1.89252e-05	0.00347664	2.6591	4.27721	0.00193969
AC104655.1	0.352674	0.57253	4.45494	1.99911e-05	0.00363536	2.48648	4.26499	0.00202825
CEP41	0.158346	4.20227	4.44428	2.08523e-05	0.00375404	2.54515	4.25556	0.00209446
PHLDB2	-0.907169	0.44433	-4.9577	2.11405e-05	0.00376825	3.2369	-4.25249	0.00210239
CCDC148	-0.230487	6.1918	-5.69888	2.17613e-05	0.00383574	7.48434	-4.24601	0.00214004
XRN2	-0.097056	6.04496	-4.43133	2.19453e-05	0.00383574	2.37761	-4.24412	0.00214004
HTR1E	-0.397754	-0.0168265	-4.42312	2.26668e-05	0.00390809	2.28695	-4.23686	0.00218041
PIKFYVE	-0.165219	6.21866	-5.28984	2.28453e-05	0.00390809	5.79211	-4.2351	0.00218041
LRRC75A	0.338788	4.04405	4.84584	2.30105e-05	0.00390809	3.98296	4.23348	0.00218041
PCDH15	-0.353409	6.9792	-4.82743	2.38204e-05	0.00400784	3.96526	-4.2257	0.00223607
USP12	-0.167516	5.54934	-6.28829	2.61231e-05	0.00434838	10.1245	-4.20487	0.00242606
YAF2	-0.122377	7.04612	-5.48504	2.64789e-05	0.00434838	6.59111	-4.20181	0.00242606
NADK2	-0.166377	4.23831	-4.38268	2.6569e-05	0.00434838	2.27174	-4.20104	0.00242606
LCOR	-0.134259	7.81977	-4.37901	2.69534e-05	0.00435539	2.15753	-4.19779	0.00242997
RBM33	-0.192713	6.74224	-4.77872	2.70957e-05	0.00435539	3.78019	-4.1966	0.00242997
AC097654.1	1.7984	-1.06345	4.44122	2.81595e-05	0.00448633	0.57385	4.18786	0.00250303
ADAMTS6	-0.726195	3.49798	-4.81253	2.85258e-05	0.00450483	3.86084	-4.18493	0.00251334
NBPF9	-0.183926	3.29442	-4.3565	2.94319e-05	0.0046075	2.24232	-4.17782	0.00257063
QTRT1	0.222596	4.89589	4.35418	2.97001e-05	0.00460941	2.1722	4.17575	0.00257169
ABHD8	0.132516	5.36543	4.35059	3.0119e-05	0.00463446	2.13169	4.17256	0.00258567
DOLK	0.383535	1.2941	4.34331	3.09855e-05	0.00472739	2.12319	4.1661	0.00263752
PSME4	-0.187247	6.43785	-4.87564	3.15125e-05	0.00474857	4.14889	-4.16225	0.00264934
AC011478.1	0.383663	1.31173	4.33678	3.17833e-05	0.00474857	2.15717	4.1603	0.00264934
CBY3	0.334425	2.47436	5.11362	3.19156e-05	0.00474857	4.92273	4.15935	0.00264934
ATP11B	-0.16324	6.4079	-4.7343	3.39871e-05	0.00501533	3.61062	-4.14496	0.00279817
SLC1A6	0.216268	2.74771	4.31308	3.48475e-05	0.00507847	2.12235	4.13923	0.00283339
PSG11	0.459038	3.69502	5.16123	3.49792e-05	0.00507847	5.28342	4.13836	0.00283339
SPI1	0.318402	1.55763	4.30657	3.57371e-05	0.005147	2.03007	4.13344	0.00287163
FAM126A	-0.262813	7.60685	-4.81083	3.76932e-05	0.00535161	3.88805	-4.12118	0.00298578
SHOC2	-0.167211	5.88652	-4.72562	3.8409e-05	0.00535161	3.5833	-4.11685	0.00298578
CCDC146	-0.186079	5.73182	-4.28757	3.84639e-05	0.00535161	1.85444	-4.11652	0.00298578
CHIC1	-0.213175	5.99541	-5.02994	3.86602e-05	0.00535161	4.74669	-4.11534	0.00298578
WASL	-0.11262	6.12711	-4.2842	3.89669e-05	0.00535161	1.83516	-4.11352	0.00298578
APPL2	-0.215214	7.25466	-5.09563	3.91468e-05	0.00535161	4.98224	-4.11246	0.00298578
LEMD3	-0.174313	5.67262	-5.58405	3.92386e-05	0.00535161	7.0185	-4.11192	0.00298578
SPECC1	-0.207522	4.56974	-4.2791	3.97422e-05	0.00537954	1.87309	-4.10897	0.00300137
NIPBL	-0.182739	8.02167	-4.82508	4.00778e-05	0.00538448	3.92051	-4.10703	0.00300413
FIG4	-0.133963	5.63268	-4.27039	4.10982e-05	0.00548068	1.79845	-4.10122	0.00305779
RPS6KA6	-0.193506	6.02259	-4.94225	4.19428e-05	0.00552303	4.40302	-4.09651	0.00308142
AUH	-0.197832	7.13192	-4.77219	4.20294e-05	0.00552303	3.74628	-4.09603	0.00308142
WDR49	-0.443526	0.260945	-4.258	4.3107e-05	0.00561592	1.84503	-4.09016	0.00313325
SENP6	-0.121082	7.541	-4.61947	4.33602e-05	0.00561592	3.16365	-4.0888	0.00313325
TDRD7	-0.207188	4.86806	-4.69949	4.44112e-05	0.00567478	3.4913	-4.08324	0.00316609
DOP1A	-0.16494	7.03042	-4.61191	4.47277e-05	0.00567478	3.14951	-4.08159	0.00316609
RBM26	-0.136728	7.38638	-4.90922	4.48267e-05	0.00567478	4.25684	-4.08108	0.00316609
RELCH	-0.170966	7.30828	-4.71735	4.50755e-05	0.00567478	3.53644	-4.07979	0.00316609
BOP1	0.26019	2.11949	4.2401	4.6175e-05	0.00577283	1.85119	4.07419	0.00322079
RALGPS2	-0.170288	8.10929	-4.42722	4.69485e-05	0.00581922	2.47611	-4.07032	0.00324667
ANKRD17	-0.135906	7.82718	-4.40722	4.71925e-05	0.00581922	2.40593	-4.06911	0.00324667
LINC01637	0.462221	2.48731	5.36957	4.86791e-05	0.00596169	6.02501	4.06188	0.00332616
LINC02224	-0.702486	4.47895	-4.35355	5.02965e-05	0.00611433	2.20697	-4.05424	0.00341132
SCHLAP1	0.705846	3.87213	4.25702	5.06047e-05	0.00611433	1.82718	4.05282	0.00341132
RPEL1	0.631507	-0.187688	4.34441	5.17789e-05	0.00621451	1.0962	4.04745	0.00346721
ZNF48	0.174651	2.61472	4.20227	5.33641e-05	0.0062683	1.73872	4.04038	0.00349722
ERBB3	0.430257	0.252147	5.15887	5.34133e-05	0.0062683	4.62421	4.04017	0.00349722
AC016717.2	-0.321596	4.44665	-4.36336	5.35692e-05	0.0062683	2.25507	-4.03948	0.00349722
MMP25	0.276823	0.680839	4.19553	5.47516e-05	0.0062683	1.62803	4.03436	0.00349722
GALE	0.260832	3.44325	4.24623	5.50678e-05	0.0062683	1.73205	4.03301	0.00349722
NDUFAF5	-0.110295	6.15865	-4.19374	5.51265e-05	0.0062683	1.50959	-4.03276	0.00349722
PAG1	-0.208545	6.69915	-5.05551	5.51815e-05	0.0062683	4.81494	-4.03252	0.00349722
WDFY3	-0.165129	7.84277	-4.64339	5.55518e-05	0.0062683	3.25614	-4.03095	0.00349722
ZNF8	-0.114398	3.45657	-4.19165	5.55666e-05	0.0062683	1.64851	-4.03089	0.00349722
RAB3GAP1	-0.101895	6.82046	-4.19098	5.57089e-05	0.0062683	1.48336	-4.03029	0.00349722
MID2	-0.210843	4.17457	-5.07405	5.67662e-05	0.00634759	4.94064	-4.02587	0.00354146
ASIP	0.297926	3.09553	4.18369	5.72769e-05	0.00636516	1.67098	4.02376	0.00355127
PELI2	-0.237592	8.54652	-4.54907	5.84154e-05	0.00645185	2.90261	-4.01912	0.00359963
SNAI3	0.324047	2.38964	4.88553	5.94017e-05	0.00650672	4.11674	4.01517	0.00363025
SLC25A40	-0.139767	4.3856	-4.17307	5.9635e-05	0.00650672	1.52157	-4.01425	0.00363025
ZEB1	-0.200133	8.44135	-4.47789	6.03471e-05	0.006523	2.63805	-4.01145	0.00363933
XRN1	-0.16867	7.39754	-4.95208	6.05089e-05	0.006523	4.40996	-4.01082	0.00363933
NAA35	-0.125823	6.53625	-4.983	6.16038e-05	0.00658804	4.53924	-4.00658	0.00367562
TOP2B	-0.169636	7.09608	-4.55866	6.18441e-05	0.00658804	2.94967	-4.00566	0.00367562
PPP3R1	-0.158686	7.25074	-4.66864	6.26905e-05	0.00663892	3.35151	-4.00245	0.00370401
ARHGEF12	-0.157806	8.0787	-5.03112	6.35133e-05	0.00668673	4.68926	-3.99936	0.00373067
LMAN1	-0.158851	5.39808	-4.17954	6.40016e-05	0.0066927	1.63006	-3.99755	0.00373401
GPBP1L1	-0.0874511	6.10061	-4.15315	6.43135e-05	0.0066927	1.36569	-3.9964	0.00373401
ANKMY2	-0.131971	5.44634	-4.15148	6.47198e-05	0.00669627	1.38558	-3.99491	0.003736
TET1	0.507598	2.40694	4.16996	6.55482e-05	0.00671845	1.27575	3.99189	0.00374838
AC112196.1	0.348368	5.0981	4.70004	6.56806e-05	0.00671845	3.50034	3.99141	0.00374838
AC090625.2	0.358012	0.0954367	4.14186	6.71181e-05	0.00682671	1.26402	3.98628	0.00380877
AC127070.2	0.447669	0.293013	4.33726	6.76173e-05	0.00683884	1.17061	3.98452	0.00381555
SBNO1	-0.0885975	6.22433	-4.13146	6.98058e-05	0.00702075	1.28394	-3.97695	0.00391704
NBEA	-0.209448	9.20001	-4.33695	7.12833e-05	0.00711367	2.15205	-3.97196	0.00396888
PKP4	-0.187688	8.49164	-4.51671	7.152e-05	0.00711367	2.79277	-3.97117	0.00396888
TTC39B	-0.178329	5.5658	-5.17097	7.27937e-05	0.00714328	5.30214	-3.96697	0.00398539
MAP4K5	-0.145548	7.65143	-4.12024	7.28211e-05	0.00714328	1.2227	-3.96688	0.00398539
MBD5	-0.184309	9.23974	-4.48311	7.3008e-05	0.00714328	2.66389	-3.96626	0.00398539
ZBTB44	-0.150841	5.71086	-4.38583	7.39791e-05	0.0071958	2.34342	-3.96311	0.0040147
CRELD2	0.24023	3.96178	4.38072	7.46994e-05	0.0071958	2.28987	3.9608	0.0040147
NUP35	-0.14465	4.64554	-5.57811	7.48253e-05	0.0071958	7.00782	-3.9604	0.0040147
AC138956.1	0.402481	1.80908	4.25907	7.51436e-05	0.0071958	1.53806	3.95938	0.0040147
XPO7	-0.166593	6.31145	-4.84004	7.65369e-05	0.00729044	3.9882	-3.95499	0.0040675
UBP1	-0.129618	5.67611	-5.0822	7.762e-05	0.00735469	4.95718	-3.95163	0.00410335
ARHGAP5	-0.13377	7.53481	-4.5045	8.08749e-05	0.00762299	2.72021	-3.94179	0.00425304
CADM2	-0.192428	11.4392	-4.39211	8.18336e-05	0.00767318	2.3322	-3.93897	0.00428104
RANBP2	-0.156461	7.26466	-4.0849	8.31557e-05	0.00775674	1.10123	-3.93512	0.00432766
BMT2	-0.163594	6.82836	-4.4419	8.44367e-05	0.00780027	2.51861	-3.93145	0.00435195
SHPRH	-0.15939	7.57735	-4.96347	8.44889e-05	0.00780027	4.44642	-3.9313	0.00435195
FAM184A	-0.182556	6.52252	-5.05966	8.50453e-05	0.00781158	4.83957	-3.92972	0.00435826
CPT2	0.223072	2.56197	4.7531	8.58552e-05	0.00782196	3.69982	3.92744	0.00436405
ROCK2	-0.13888	6.42896	-4.92854	8.60273e-05	0.00782196	4.31442	-3.92696	0.00436405
WDR36	-0.151118	4.3657	-4.0719	8.73013e-05	0.00789791	1.16986	-3.92342	0.00440642
GNA13	-0.115591	4.53887	-4.06896	8.82642e-05	0.00792433	1.14756	-3.92078	0.00442116
FSTL5	-0.182165	11.4151	-4.29962	8.8876e-05	0.00792433	2.01637	-3.91911	0.00442116
SCAF4	-0.143832	5.14799	-4.48365	8.93528e-05	0.00792433	2.69798	-3.91782	0.00442116
AL121933.2	0.285392	3.30022	4.06568	8.93539e-05	0.00792433	1.26731	3.91782	0.00442116
SRD5A3-AS1	0.411842	1.93901	4.25801	9.02153e-05	0.0079363	1.58796	3.9155	0.00442784
AL512625.3	0.444147	2.6722	4.10317	9.06149e-05	0.0079363	1.16316	3.91444	0.00442784
ZSCAN18	0.184605	5.89602	4.42803	9.08114e-05	0.0079363	2.49296	3.91392	0.00442784
SUCO	-0.151252	6.32507	-4.72614	9.14492e-05	0.00795343	3.54567	-3.91223	0.0044374
CDK8	-0.198102	7.58722	-4.46663	9.3429e-05	0.00804517	2.58421	-3.90705	0.00448858
ETV4	0.321649	3.90105	4.58745	9.35868e-05	0.00804517	3.05312	3.90664	0.00448858
G2E3	-0.15383	6.0329	-4.97869	9.40171e-05	0.00804517	4.54589	-3.90554	0.00448858
NHLRC2	-0.156411	6.05689	-4.74131	9.43754e-05	0.00804517	3.62677	-3.90462	0.00448858
TMBIM1	0.258985	1.07986	4.0491	9.50505e-05	0.00804517	1.16536	3.90289	0.00448858
BCLAF1	-0.181349	6.95502	-4.86492	9.51853e-05	0.00804517	4.04561	-3.90255	0.00448858
IGF2R	-0.167792	5.43836	-5.15855	9.57649e-05	0.00805634	5.24556	-3.90108	0.00449481
SULT1A2	0.320331	0.842491	4.04446	9.67081e-05	0.0080603	1.11781	3.89871	0.00449702
TASOR2	-0.150267	7.10754	-4.48657	9.73084e-05	0.0080603	2.6679	-3.89721	0.00449702
RNF217	-0.20333	5.33432	-4.48706	9.74649e-05	0.0080603	2.70983	-3.89682	0.00449702
EEF1AKMT1	0.124131	4.62449	4.04198	9.76029e-05	0.0080603	1.07686	3.89647	0.00449702
PAQR7	0.270314	0.917005	4.04027	9.8226e-05	0.00807471	1.13383	3.89493	0.00450506
ARHGAP29	-0.166417	5.28342	-4.03885	9.87451e-05	0.0080805	0.998975	-3.89365	0.00450829
HYAL2	0.45365	1.35037	4.95094	0.000100246	0.00816619	4.13875	3.89	0.0045561
KLHL29	-0.267933	4.00831	-4.03067	0.000101794	0.00824918	1.03987	-3.88628	0.00460241
GOLGB1	-0.129982	6.66372	-4.02965	0.000102181	0.00824918	0.915827	-3.88535	0.00460241
GLCCI1	-0.204888	8.56197	-4.02542	0.000103797	0.0083422	0.888329	-3.88154	0.0046543
ZNF7	0.250553	4.52692	4.31302	0.000104615	0.00837059	2.0959	3.87963	0.00467014
MAP4K3	-0.171938	7.99448	-4.59239	0.000105582	0.0084106	3.02413	-3.87739	0.00469247
METTL25	-0.157561	6.102	-5.05797	0.00010608	0.00841303	4.81921	-3.87625	0.00469382
TMEM35B	0.215837	1.29684	4.01563	0.000107633	0.00848376	1.08359	3.87271	0.00473328
PCDHGA2	-0.272886	0.859589	-4.01428	0.000108173	0.00848376	1.09379	-3.87149	0.00473328
KIAA1324L	-0.129736	5.89703	-4.01375	0.000108386	0.00848376	0.88268	-3.87101	0.00473328
ITGAV	-0.145377	8.13347	-4.0063	0.000111415	0.00857516	0.822205	-3.86429	0.00478428
AC018647.1	0.418461	0.719368	4.63191	0.000111459	0.00857516	2.89375	3.86419	0.00478428
SLC35E2A	0.289923	4.08543	4.52562	0.000112172	0.00857516	2.81437	3.86263	0.00478428
ZNF548	-0.167204	2.70313	-4.00405	0.000112345	0.00857516	1.04434	-3.86226	0.00478428
MAP2	-0.153949	8.57862	-4.27097	0.000112383	0.00857516	1.90045	-3.86217	0.00478428
G3BP1	-0.099841	5.8708	-4.00389	0.000112411	0.00857516	0.849755	-3.86211	0.00478428
AC016747.2	0.498614	0.0245885	4.10762	0.000115011	0.00872966	0.427652	3.85652	0.00487048
MEF2A	-0.123785	7.27712	-4.32751	0.000115714	0.00872966	2.11259	-3.85503	0.00487048
PNMA3	0.512352	1.03197	4.50178	0.000115902	0.00872966	2.55394	3.85464	0.00487048
PPP4R3A	-0.137791	5.79128	-4.54651	0.000116376	0.00872966	2.90221	-3.85364	0.00487048
CCDC50	-0.130674	5.48899	-3.99294	0.000117051	0.00873403	0.829093	-3.85222	0.00487292
HCFC2	-0.157553	5.61902	-4.43237	0.000117405	0.00873403	2.50868	-3.85148	0.00487292
NEK7	-0.183192	6.61398	-4.60689	0.000118056	0.00874633	3.10521	-3.85013	0.00487978
OSBPL1A	-0.198579	7.04148	-4.02153	0.000119308	0.00880288	1.08987	-3.84754	0.00491132
KLHL24	-0.172125	6.31975	-4.94622	0.000121124	0.00885164	4.4076	-3.84384	0.00493853
GTPBP3	0.229804	3.32216	5.35927	0.000121309	0.00885164	6.05373	3.84347	0.00493853
TNFRSF14	0.430188	0.27684	3.98294	0.000121444	0.00885164	0.880765	3.84319	0.00493853
MAP3K1	-0.173849	5.1852	-4.01993	0.000124985	0.00907298	1.10104	-3.83614	0.00506202
LAMA2	-0.407395	5.21208	-4.21311	0.000126575	0.0091509	1.7499	-3.83303	0.00510549
SESTD1	-0.139487	6.62883	-4.70639	0.000127075	0.0091509	3.45913	-3.83206	0.00510549
HOGA1	0.380809	0.503885	4.60882	0.000128407	0.00921	2.71564	3.82949	0.00513847
ERAP2	0.266487	1.99803	3.96641	0.000129061	0.00922015	0.949319	3.82824	0.00514413
CAMK2D	-0.200677	9.20087	-4.02327	0.000129901	0.00924354	1.08117	-3.82665	0.00515718
LINC01876	-0.417977	4.70374	-3.96095	0.000131675	0.00929289	0.736391	-3.8233	0.00518471
CHD7	-0.225767	5.83341	-4.74783	0.000131905	0.00929289	3.63368	-3.82287	0.00518471
LINC02680	-0.379454	2.37896	-3.95931	0.000132468	0.00929289	0.911878	-3.82182	0.00518471
ZNF891	-0.16893	4.95189	-4.56202	0.000132716	0.00929289	2.97962	-3.82136	0.00518471
PSG1	0.557848	2.75982	4.08086	0.000133299	0.00929289	1.17051	3.82028	0.00518471
MOB1B	-0.320806	3.30856	-4.24757	0.000133692	0.00929289	1.81563	-3.81956	0.00518471
C9orf64	0.195937	1.88364	3.95477	0.000134694	0.0093265	0.907815	3.81771	0.00520347
RABEPK	0.187115	5.03868	4.60426	0.000135881	0.00937265	3.12919	3.81555	0.00522921
HLF	-0.198783	7.73467	-3.95022	0.000136958	0.00941092	0.631343	-3.8136	0.00525056
LINC01473	-0.231616	8.31993	-4.81754	0.000139033	0.00951715	3.84208	-3.80988	0.00530983
UBL3	-0.177598	7.84831	-4.17161	0.000141362	0.00963995	1.55957	-3.80577	0.00537835
LINC01431	0.320353	1.41132	3.93773	0.000143364	0.00973954	0.830733	3.80229	0.00543391
NECTIN3	-0.276119	3.97827	-4.67752	0.000145404	0.00977611	3.41117	-3.79879	0.00545431
OR52I1	0.478652	0.264758	4.54569	0.000145915	0.00977611	2.36497	3.79792	0.00545431
FERMT2	-0.150215	6.2247	-4.54459	0.000146735	0.00977611	2.86718	-3.79653	0.00545431
KHDC1	0.174119	5.62282	4.47715	0.000147069	0.00977611	2.64691	3.79597	0.00545431
MBNL1	-0.14834	6.80025	-4.34992	0.000147258	0.00977611	2.18331	-3.79565	0.00545431
TMEM170B	-0.132535	4.64929	-3.92978	0.000147593	0.00977611	0.66044	-3.79509	0.00545431
FNBP1L	-0.208732	5.90821	-4.6837	0.000147703	0.00977611	3.39425	-3.7949	0.00545431
2023-03-02	0.293051	3.51851	4.89137	0.000148347	0.00977854	4.22748	3.79382	0.00545567
CNTN1	-0.148429	9.05724	-3.92692	0.00014914	0.00977854	0.550824	-3.7925	0.00545567
B3GAT3	0.256583	4.93656	4.04573	0.000150159	0.00977854	1.18864	3.79081	0.00545567
NAF1	-0.19482	5.4348	-4.46783	0.000150317	0.00977854	2.63352	-3.79054	0.00545567
TNPO1	-0.137423	7.58181	-4.23686	0.000150456	0.00977854	1.76889	-3.79032	0.00545567
OXSR1	-0.133132	6.15444	-4.83812	0.00015152	0.0098123	3.93348	-3.78856	0.00547451
AC104984.3	0.389423	2.67647	4.30364	0.00015251	0.009841	1.99804	3.78695	0.00549052
VPS41	-0.141747	6.49386	-4.41724	0.000153236	0.00985252	2.41817	-3.78577	0.00549695
IPO8	-0.155948	5.26015	-4.13268	0.000155381	0.00995488	1.47478	-3.78231	0.00555405
EXOSC1	0.201024	5.00498	4.17477	0.000158332	0.0100479	1.62091	3.77762	0.00560597
NDUFV3	0.110697	6.14703	3.90907	0.000159166	0.0100479	0.526002	3.77631	0.00560597
GTF2IRD2	0.303302	4.51508	4.34424	0.000159326	0.0100479	2.20902	3.77606	0.00560597
CWC22	-0.0937376	5.66218	-3.90856	0.000159463	0.0100479	0.535788	-3.77585	0.00560597
PTPN12	-0.16884	5.35547	-5.10264	0.000159973	0.0100479	5.02209	-3.77505	0.00560597
MAN1A2	-0.175269	6.91972	-4.09504	0.000160182	0.0100479	1.31066	-3.77473	0.00560597
RFX7	-0.153237	7.39119	-4.08834	0.000160852	0.0100549	1.28977	-3.77369	0.00560987
XPR1	-0.145237	6.66523	-4.43501	0.000161883	0.0100692	2.45275	-3.77209	0.00561783
FSD1L	-0.163131	6.09399	-4.66333	0.000162199	0.0100692	3.29477	-3.77161	0.00561783
ADAM20	-0.250879	0.940749	-3.90187	0.000163389	0.0101082	0.730332	-3.76978	0.00563961
PDHX	-0.0875855	6.2623	-3.89821	0.000165576	0.0102064	0.474898	-3.76646	0.0056944
DICER1	-0.151221	7.50506	-4.47096	0.00016611	0.0102064	2.5875	-3.76566	0.0056944
SPDYE21P	0.323974	4.74876	4.36761	0.000167075	0.0102166	2.28907	3.76421	0.00570009
HBP1	-0.187954	5.75364	-4.7069	0.000167411	0.0102166	3.49908	-3.76371	0.00570009
ZNF69	-0.179304	2.53974	-3.89178	0.000169485	0.0102998	0.682596	-3.76063	0.00574651
CEP120	-0.115388	5.1397	-3.88954	0.000170867	0.0102998	0.493558	-3.7586	0.00574651
TPP2	-0.172213	6.00988	-4.23092	0.000171125	0.0102998	1.79366	-3.75822	0.00574651
PCNX1	-0.171537	7.45321	-4.26491	0.000171594	0.0102998	1.87055	-3.75754	0.00574651
AL132656.3	0.321104	0.0855615	3.88738	0.000172214	0.0102998	0.582867	3.75663	0.00574651
CD163L1	-0.23908	4.02517	-3.88682	0.000172559	0.0102998	0.56397	-3.75613	0.00574651
MBD2	-0.0941341	5.1534	-3.88601	0.000173069	0.0102998	0.476039	-3.75539	0.00574651
HYAL1	0.223806	1.73121	3.88381	0.000174453	0.0102998	0.679078	3.7534	0.00574651
CCDC186	-0.153893	6.20069	-4.20352	0.000174663	0.0102998	1.69192	-3.7531	0.00574651
TRMT10B	0.207249	5.63667	4.07057	0.000175035	0.0102998	1.26158	3.75256	0.00574651
ZDHHC17	-0.131046	6.90028	-4.65376	0.000175302	0.0102998	3.25297	-3.75218	0.00574651
SCAF11	-0.127861	7.48783	-4.47931	0.000176483	0.0102998	2.58312	-3.7505	0.00574651
TAF1B	-0.201558	6.15973	-4.75564	0.000177381	0.0102998	3.61189	-3.74923	0.00574651
DMXL2	-0.188295	6.88246	-4.38451	0.000177409	0.0102998	2.29631	-3.74919	0.00574651
LRRC8A	0.256106	3.26644	4.47932	0.000178114	0.0102998	2.64681	3.74819	0.00574651
CHD1	-0.139597	6.62706	-4.5322	0.000178685	0.0102998	2.83225	-3.74739	0.00574651
GPR137C	-0.206212	7.74074	-4.13955	0.00017872	0.0102998	1.45836	-3.74734	0.00574651
BAZ2B	-0.17326	7.87459	-4.04804	0.000179626	0.0102998	1.15445	-3.74607	0.00574651
LEPR	-0.558059	4.59447	-3.942	0.000180654	0.0102998	0.849067	-3.74464	0.00574651
CARHSP1	0.253026	3.96001	4.42342	0.000181009	0.0102998	2.49424	3.74414	0.00574651
PEAK1	-0.125516	7.14096	-3.87351	0.000181084	0.0102998	0.375271	-3.74404	0.00574651
IFIT3	0.352097	2.88932	3.97833	0.000181361	0.0102998	0.860236	3.74366	0.00574651
SPINK8	0.328001	2.4594	4.15479	0.000184582	0.0104498	1.41059	3.73923	0.00583015
FGF13	-0.423454	3.42953	-4.53177	0.00018517	0.0104502	2.86336	-3.73843	0.00583041
ANO8	0.196274	2.74421	3.86419	0.000187285	0.0104742	0.60344	3.73558	0.00584381
GPR137	0.16121	3.87423	3.86403	0.000187394	0.0104742	0.549655	3.73543	0.00584381
ITGAL	0.324488	3.8496	4.29371	0.000187555	0.0104742	2.03117	3.73521	0.00584381
STXBP5L	-0.213434	8.84983	-4.17258	0.000188659	0.0104742	1.5605	-3.73374	0.00584381
TAGAP	0.33695	0.0745386	3.86206	0.000188729	0.0104742	0.473988	3.73364	0.00584381
CHIC2	-0.136653	5.06333	-4.71572	0.000189087	0.0104742	3.54245	-3.73317	0.00584381
MYO9A	-0.172586	8.02549	-4.16774	0.000190661	0.0105172	1.5328	-3.73108	0.00586781
RRNAD1	0.118728	4.05952	3.8587	0.000191032	0.0105172	0.5118	3.73059	0.00586781
NRIP1	-0.181076	6.3114	-3.97743	0.000193783	0.0106362	0.938756	-3.72699	0.00593419
AC091045.1	0.380097	3.07607	4.23245	0.000194701	0.0106484	1.80905	3.72579	0.00594099
AC018752.1	0.382926	2.80527	4.2876	0.000195188	0.0106484	1.94872	3.72516	0.00594099
MAP3K14-AS1	0.238134	0.960523	3.84701	0.000199251	0.0108343	0.527539	3.71996	0.00604468
HSD17B4	-0.0937304	5.8386	-3.84609	0.000199913	0.0108343	0.315561	-3.71913	0.00604468
ZNF148	-0.0926478	7.39099	-3.84542	0.0002004	0.0108343	0.277322	-3.71851	0.00604468
ZMYND12	0.315458	1.86486	3.88637	0.000201005	0.0108344	0.359871	3.71775	0.00604477
RASGRF2	-0.198578	7.16994	-4.18532	0.00020217	0.0108647	1.59136	-3.71629	0.00606164
SPOPL	-0.136565	5.57276	-4.73097	0.000207734	0.0111305	3.55545	-3.70942	0.00620993
AC009107.2	0.445216	3.44953	4.15002	0.000212389	0.0113461	1.53127	3.70381	0.00633025
PRKACB	-0.176477	8.0358	-4.38174	0.000214392	0.0114046	2.25663	-3.70143	0.00636287
TOGARAM1	-0.129228	6.65315	-4.13055	0.00021475	0.0114046	1.4221	-3.701	0.00636287
PPP2R2A	-0.15849	7.00965	-4.17627	0.000217302	0.0115061	1.55339	-3.698	0.00641953
TMEM41B	-0.114664	6.06269	-3.82117	0.000218636	0.0115428	0.221537	-3.69645	0.00644002
ZMYND11	-0.10796	6.81457	-4.4249	0.000220162	0.0115894	2.39205	-3.69468	0.006466
FALEC	0.285829	3.11072	3.97201	0.000220911	0.0115949	0.888636	3.69382	0.00646908
MMP24	0.234296	5.62658	4.008	0.000221686	0.0116018	1.05084	3.69293	0.00647291
CHDH	0.38066	2.95248	4.82353	0.000223251	0.0116498	3.95073	3.69114	0.00649969
AC131568.1	0.320726	3.05347	4.37498	0.00022424	0.0116676	2.31746	3.69002	0.00650961
2023-03-08	-0.127421	5.04689	-4.44595	0.000234463	0.0121644	2.53617	-3.67866	0.00678679
PDCD6IP	-0.0804649	6.21717	-3.79836	0.000237224	0.0122722	0.142871	-3.67567	0.00684696
DYRK1A	-0.152333	7.82765	-4.35052	0.000239978	0.0123202	2.10101	-3.67272	0.00687372
SLAIN1	-0.201538	5.69035	-4.42478	0.000240363	0.0123202	2.42952	-3.67232	0.00687372
ANKRD50	-0.324708	2.86109	-4.06091	0.000241197	0.0123202	1.18899	-3.67143	0.00687372
CTNND2	-0.205758	8.48941	-3.86494	0.000241331	0.0123202	0.566183	-3.67129	0.00687372
HIVEP2	-0.163902	6.96374	-4.43172	0.000241572	0.0123202	2.38613	-3.67103	0.00687372
FAM138C	0.835711	2.86753	3.79206	0.000242616	0.0123385	0.390277	3.66993	0.00688391
WDR73	0.26045	5.50108	3.88342	0.000243642	0.0123557	0.658842	3.66885	0.00689353
AL138831.1	0.469686	1.74295	4.20482	0.000244409	0.0123598	1.58815	3.66805	0.00689583
L3MBTL3	-0.179344	3.435	-3.78426	0.000249457	0.0125798	0.270366	-3.66282	0.00701854
ARID4B	-0.120751	7.93434	-4.51112	0.000250623	0.0126033	2.65225	-3.66162	0.00703165
FNDC3A	-0.152986	7.84263	-4.10805	0.00025329	0.0126471	1.30279	-3.65891	0.0070561
ZNF641	0.125597	3.80378	3.77928	0.000253924	0.0126471	0.255461	3.65827	0.0070561
ASPH	-0.137308	8.04115	-3.77809	0.000255001	0.0126471	0.0495071	-3.65718	0.0070561
CFTR	0.439407	2.65245	3.85134	0.000255513	0.0126471	0.448389	3.65667	0.0070561
MDGA2	-0.194695	11.4188	-3.89704	0.000255747	0.0126471	0.660475	-3.65643	0.0070561
TRAF6	-0.165302	3.81443	-3.77679	0.000256177	0.0126471	0.217595	-3.656	0.0070561
AC019197.1	-0.271573	3.84563	-4.58847	0.000256412	0.0126471	3.08717	-3.65577	0.0070561
SEC14L2	0.287332	5.08457	4.39871	0.000258754	0.012698	2.39616	3.65344	0.00708452
PLEKHA8	-0.24509	5.26702	-4.51302	0.000258934	0.012698	2.79172	-3.65326	0.00708452
GAU1	0.385956	2.54124	3.93671	0.000259561	0.012698	0.712066	3.65264	0.00708452
AL445250.1	-0.451069	4.06535	-4.79142	0.000261501	0.0127462	3.84354	-3.65073	0.00711142
PHIP	-0.143936	8.38092	-3.91168	0.000261962	0.0127462	0.691633	-3.65027	0.00711142
CCDC179	0.355061	0.131528	3.76961	0.000262803	0.0127527	0.218624	3.64945	0.00711501
APOA1-AS	0.387025	2.78002	4.23061	0.000264262	0.012756	1.73486	3.64803	0.00711685
EML5	-0.184619	7.73957	-4.17361	0.000264319	0.012756	1.53476	-3.64797	0.00711685
MRPS30-DT	-0.365591	7.66453	-3.82832	0.000264997	0.012756	0.452022	-3.64731	0.00711685
ARHGAP1	0.160353	3.60528	3.76543	0.000266731	0.0128052	0.240342	3.64564	0.00714431
SMAD4	-0.128789	5.90894	-4.61389	0.000268114	0.0128374	3.1325	-3.64431	0.00716227
ZBTB8A	0.144896	4.46854	3.76256	0.000269464	0.0128678	0.156888	3.64301	0.00717924
ETNK1	-0.179537	6.91158	-4.20333	0.000271633	0.0129371	1.6485	-3.64095	0.00721787
TTLL4	-0.18454	3.55699	-3.75937	0.000272526	0.0129453	0.175346	-3.64011	0.0072225
TMEM42	0.238504	3.2304	4.54622	0.000275463	0.0130504	2.93202	3.63735	0.00728111
AC105206.2	0.370873	3.15288	3.94477	0.000276245	0.0130531	0.819742	3.63661	0.00728264
MAPK8	-0.164647	8.91436	-3.96451	0.000278063	0.013084	0.835012	-3.63492	0.00729988
SOS1	-0.122779	7.79256	-4.3794	0.000279307	0.013084	2.15953	-3.63377	0.00729988
MIR155HG	0.360006	3.09952	3.8442	0.00027967	0.013084	0.484459	3.63344	0.00729988
AC005899.8	0.268875	4.28643	3.75144	0.000280296	0.013084	0.147489	3.63286	0.00729988
COG3	-0.152233	4.94165	-4.2367	0.000280533	0.013084	1.82358	-3.63264	0.00729988
RIF1	-0.155945	6.51755	-4.42873	0.000282695	0.0131508	2.37271	-3.63066	0.00733712
ROCK1	-0.134914	7.20379	-4.06072	0.000283461	0.0131525	1.15476	-3.62996	0.00733805
KIF5C	-0.165478	7.70946	-4.21531	0.000284875	0.0131841	1.6757	-3.62868	0.00735569
LETM1	0.16928	3.61364	3.74559	0.000286153	0.0132092	0.170336	3.62752	0.00736974
ZBTB32	0.351316	2.38664	4.33655	0.000287178	0.0132227	2.13016	3.6266	0.00737722
USP47	-0.142582	7.22617	-3.90182	0.000289128	0.0132454	0.660591	-3.62485	0.0073899
MBOAT7	0.184903	3.73563	4.36233	0.000289724	0.0132454	2.28231	3.62432	0.0073899
AC092747.4	-0.187575	2.22949	-3.74169	0.000290128	0.0132454	0.211371	-3.62396	0.0073899
SLAIN2	-0.157385	5.60821	-4.52598	0.00029163	0.0132454	2.83401	-3.62262	0.0073899
AKR1C3	0.636009	0.676258	4.01197	0.000291922	0.0132454	0.679355	3.62236	0.0073899
FBXL12	0.169595	3.53047	4.62799	0.000292556	0.0132454	3.24988	3.6218	0.0073899
VPS54	-0.219563	7.73595	-3.98309	0.000292821	0.0132454	0.898909	-3.62157	0.0073899
WASF1	-0.157394	5.94552	-3.98938	0.000297305	0.0134145	0.971886	-3.61764	0.00748425
PRKD1	-0.254539	6.57229	-3.93389	0.000305224	0.0137149	0.791532	-3.61083	0.00765184
OSBPL8	-0.127872	7.90045	-3.72708	0.000305486	0.0137149	-0.117959	-3.6106	0.00765184
ZPBP	-0.279724	9.54747	-3.7397	0.000308923	0.0138075	0.174249	-3.6077	0.0077035
ENTHD1	-0.363063	1.47554	-3.72376	0.000309083	0.0138075	0.1815	-3.60757	0.0077035
LIPE	0.202585	4.35713	3.96438	0.000309864	0.0138081	0.926554	3.60691	0.00770386
NDFIP2	-0.220437	5.72946	-3.93279	0.000311303	0.013838	0.78689	-3.60571	0.00772052
PPM1A	-0.194799	5.73354	-3.82911	0.000313886	0.0139185	0.463343	-3.60356	0.00776542
LYPD6	-0.361225	4.68503	-3.78189	0.000315165	0.013935	0.343413	-3.60251	0.00777465
PXK	-0.113915	5.67606	-3.71754	0.000315926	0.013935	-0.104292	-3.60188	0.00777465
PCYOX1L	0.27795	2.01945	4.37436	0.000316581	0.013935	2.30006	3.60134	0.00777465
ARFGEF1	-0.124832	7.51187	-4.13704	0.000324082	0.0140488	1.38065	-3.59525	0.00783814
KCNH8	-0.465953	5.40022	-3.95002	0.000324217	0.0140488	0.858449	-3.59514	0.00783814
HMBOX1	-0.163975	6.73755	-4.26298	0.000324494	0.0140488	1.83074	-3.59492	0.00783814
BTAF1	-0.146317	6.56184	-4.28132	0.00032462	0.0140488	1.91656	-3.59482	0.00783814
ARHGAP30	0.368571	1.09081	4.23248	0.000325123	0.0140488	1.68991	3.59441	0.00783814
LCP1	0.351136	0.404011	3.70891	0.000325657	0.0140488	0.0407536	3.59399	0.00783814
ZNF595	-0.186221	4.30382	-3.83984	0.000326453	0.0140488	0.523153	-3.59335	0.00783814
AC024901.1	-0.395695	1.83112	-3.70812	0.000326561	0.0140488	0.1229	-3.59326	0.00783814
2023-03-01	-0.226376	8.52832	-3.79172	0.000326643	0.0140488	0.310227	-3.5932	0.00783814
UBR5	-0.145286	7.73268	-4.06083	0.00032697	0.0140488	1.13687	-3.59294	0.00783814
AHRR	-0.386737	0.151034	-3.70659	0.000328326	0.0140531	0.0817143	-3.59186	0.00784055
AC008537.4	0.338053	2.05093	4.09424	0.000328738	0.0140531	1.23975	3.59153	0.00784055
RC3H1	-0.134303	6.96109	-3.95742	0.000329878	0.0140531	0.835866	-3.59063	0.00784055
QKI	-0.180058	7.52074	-3.70497	0.000330193	0.0140531	-0.186029	-3.59038	0.00784055
AC013267.2	0.319671	2.55569	4.28695	0.000333152	0.0141456	2.01664	3.58806	0.00789214
SCAMP2	0.130223	3.48932	3.70144	0.000334316	0.0141616	0.0383292	3.58715	0.00790109
PPP4R1	-0.134819	5.77828	-4.05725	0.000335225	0.0141668	1.19316	-3.58644	0.00790397
AC012020.1	-0.309211	2.77807	-3.71734	0.000340266	0.0143367	0.0495368	-3.58254	0.00799877
ARHGAP12	-0.142392	5.35912	-3.69593	0.000340838	0.0143367	-0.163235	-3.5821	0.00799877
BRWD1	-0.147921	7.42401	-4.19875	0.000343756	0.0144257	1.56702	-3.57988	0.00804844
DPM1	-0.159556	5.21072	-4.0978	0.00034695	0.0145187	1.34013	-3.57746	0.00810029
TNKS2	-0.119643	6.52327	-4.42453	0.000347583	0.0145187	2.38602	-3.57698	0.00810029
CBLB	-0.181152	8.51803	-4.05366	0.000351011	0.0146279	1.08457	-3.57442	0.00816124
THEM6	0.230557	2.63819	3.68667	0.000352066	0.014638	0.0518567	3.57363	0.00816685
ZNF516	-0.215242	6.02556	-4.301	0.000353092	0.0146468	1.96961	-3.57287	0.00817179
CNKSR2	-0.244245	5.41799	-3.82381	0.000354783	0.0146662	0.457611	-3.57162	0.00818263
EXOC6B	-0.152407	8.2225	-3.83734	0.00035519	0.0146662	0.453002	-3.57132	0.00818263
MKLN1	-0.142116	7.74686	-4.16501	0.00035659	0.0146678	1.4401	-3.57029	0.00818349
MDM2	-0.0751313	5.16263	-3.68281	0.000356857	0.0146678	-0.185277	-3.57009	0.00818349
AC092338.2	0.273159	2.38549	4.22872	0.000357733	0.0146703	1.78575	3.56945	0.0081849
TMEM161B	-0.148373	5.24926	-4.55935	0.000359171	0.0146958	2.94918	-3.5684	0.00819911
AL354949.1	0.415161	3.81779	3.80714	0.000362007	0.0147669	0.417814	3.56634	0.00823878
AC093496.1	-0.360366	6.24405	-3.73501	0.000362549	0.0147669	0.171969	-3.56594	0.00823878
CERT1	-0.114712	6.63997	-4.31398	0.000365262	0.0148438	2.06008	-3.56399	0.00828171
ITGA9	0.274009	3.47099	4.22801	0.00036899	0.0149288	1.81492	3.56132	0.00832914
TENT4A	-0.153859	5.47214	-4.62275	0.000369013	0.0149288	3.11952	-3.56131	0.00832914
B3GALT1	-0.225714	1.14213	-3.67091	0.000372006	0.0150043	0.0201172	-3.55919	0.00837124
DYRK1B	0.159666	3.267	3.67001	0.000373175	0.0150043	-0.0411894	3.55836	0.00837124
AC108449.1	0.332423	3.26688	3.76193	0.000373378	0.0150043	0.259753	3.55822	0.00837124
FAM160B1	-0.157075	4.57086	-4.30341	0.000376076	0.0150682	2.05866	-3.55633	0.00840688
TM7SF2	0.385878	2.60366	4.04542	0.000376642	0.0150682	1.18541	3.55593	0.00840688
RASGEF1B	-0.19156	7.93247	-3.66376	0.000381394	0.0151636	-0.324268	-3.55263	0.00846009
NAA25	-0.145088	6.45766	-3.78934	0.000381712	0.0151636	0.325678	-3.55242	0.00846009
MIR762HG	0.233996	3.92628	4.13275	0.000382247	0.0151636	1.48702	3.55205	0.00846009
KMT2E	-0.142999	8.65822	-4.31392	0.000382395	0.0151636	1.93048	-3.55194	0.00846009
TAB3	-0.15498	4.42651	-4.33856	0.000383376	0.015169	2.17939	-3.55127	0.00846315
SSC4D	0.354614	0.166266	3.66134	0.000384619	0.0151849	-0.107529	3.55042	0.00847197
KIFAP3	-0.096344	6.73588	-3.65867	0.000388214	0.0152932	-0.32593	-3.54797	0.00853245
UBXN7	-0.120381	5.86545	-4.49629	0.000396407	0.0155346	2.66887	-3.54246	0.0086671
MORC3	-0.10736	6.04953	-3.65234	0.000396862	0.0155346	-0.333084	-3.54216	0.0086671
GMCL1	-0.0941327	5.27394	-3.65205	0.000397261	0.0155346	-0.29341	-3.5419	0.0086671
SLC2A8	0.182797	2.56697	3.65167	0.000397792	0.0155346	-0.0526924	3.54154	0.0086671
AC093827.4	0.254161	1.95188	4.51735	0.000398937	0.0155456	2.69897	3.54079	0.00867324
PPP1R12A	-0.100932	7.06039	-3.86077	0.000400976	0.0155913	0.511022	-3.53944	0.00869874
PAICS	0.15404	5.02418	4.04065	0.000403097	0.01564	1.15556	3.53805	0.0087259
TM9SF3	-0.137946	6.56851	-4.11738	0.000404473	0.0156582	1.37316	-3.53715	0.00873608
KPNA4	-0.124832	6.15319	-3.72378	0.000405307	0.0156582	0.137649	-3.5366	0.00873608
ACVR1	-0.199729	5.98951	-3.95568	0.000408698	0.0157555	0.826998	-3.5344	0.00879032
MGAT4A	-0.122858	5.56439	-3.64227	0.000410998	0.0158103	-0.344662	-3.53292	0.0088209
TEX53	0.477352	0.804254	3.69483	0.000412578	0.0158372	-0.35262	3.5319	0.00883592
RAPGEF2	-0.184858	6.71375	-3.96924	0.000414122	0.0158626	0.840322	-3.53092	0.00885012
COL5A2	0.322407	2.47551	3.63862	0.000416231	0.0159055	-0.108143	3.52957	0.00887404
TRIQK	-0.124629	5.87426	-3.63808	0.000417008	0.0159055	-0.366715	-3.52908	0.00887404
MTMR1	-0.145203	5.17307	-3.78425	0.000417954	0.0159079	0.332674	-3.52848	0.00887536
AL049840.2	0.339131	3.47144	3.67259	0.000419799	0.0159206	-0.0132044	3.52731	0.00888245
DHRS1	0.175386	3.45765	3.6354	0.000420913	0.0159206	-0.154703	3.52661	0.00888245
STT3B	-0.187406	6.82307	-3.80586	0.000421119	0.0159206	0.352635	-3.52648	0.00888245
ASAP3	0.305315	1.69614	3.63477	0.000421825	0.0159206	-0.0880784	3.52604	0.00888245
TADA1	-0.141244	3.90914	-4.44127	0.000423879	0.0159646	2.54274	-3.52475	0.00890702
ARHGAP32	-0.177989	7.13699	-3.74027	0.000427017	0.0160422	0.169064	-3.5228	0.00895031
TXNDC16	-0.178616	6.93599	-4.54455	0.000427721	0.0160422	2.8382	-3.52236	0.00895031
SNX13	-0.14569	6.43654	-4.02181	0.000431416	0.0161471	1.01838	-3.52008	0.00900886
GLS	-0.142693	7.71614	-4.4001	0.000433103	0.0161626	2.24174	-3.51905	0.00901749
CPS1	0.687883	0.567788	3.8516	0.000434473	0.0161626	0.100382	3.51821	0.00901749
CDK17	-0.117832	5.98105	-3.95565	0.000434522	0.0161626	0.817821	-3.51818	0.00901749
CENPC	-0.169518	6.88882	-4.02963	0.000435466	0.0161643	1.03789	-3.5176	0.00901844
SMAD5	-0.181797	5.73019	-3.93787	0.000438435	0.0162411	0.787028	-3.5158	0.00906125
YTHDF3	-0.109397	5.31831	-3.61965	0.000444483	0.0163427	-0.398672	-3.51216	0.00911794
ZRANB1	-0.133622	5.263	-4.24571	0.000444658	0.0163427	1.81417	-3.51205	0.00911794
TDRP	-0.135768	6.28582	-4.31561	0.000444682	0.0163427	2.02914	-3.51204	0.00911794
API5	-0.0809514	5.50407	-3.61944	0.000444809	0.0163427	-0.403619	-3.51196	0.00911794
AC025031.1	0.358149	1.65323	3.78437	0.000445741	0.0163435	0.194967	3.51141	0.00911843
FUBP1	-0.143455	6.69793	-4.12649	0.000447686	0.0163572	1.35264	-3.51025	0.00912604
MRPS30	-0.313897	5.06726	-3.64106	0.000447931	0.0163572	-0.0913133	-3.5101	0.00912604
GOLGA4	-0.177767	8.16605	-3.97232	0.000454265	0.0165549	0.808145	-3.50637	0.00923636
SEC63	-0.112261	6.28285	-3.92622	0.000457331	0.016633	0.711454	-3.50458	0.00927992
ST6GALNAC4	0.267231	0.723326	3.61056	0.000458663	0.0166478	-0.199974	3.5038	0.00928818
NEIL1	0.252914	3.45532	4.12937	0.000459698	0.0166518	1.4741	3.5032	0.00929041
NPIPA8	0.810358	-0.432055	3.6048	0.000467863	0.0169135	-0.33097	3.49851	0.00943645
AL442071.1	0.209978	2.97731	3.73816	0.00047008	0.0169596	0.174348	3.49725	0.00946215
CRY1	-0.188298	6.42218	-3.60162	0.000473017	0.0169963	-0.505359	-3.49559	0.0094826
CTBP2	-0.116175	7.64605	-3.6015	0.000473219	0.0169963	-0.523742	-3.49547	0.0094826
NEDD4	-0.484129	1.41538	-3.75173	0.000474421	0.0169963	0.0530464	-3.4948	0.0094826
ZBED5-AS1	0.172302	3.33048	3.60035	0.00047509	0.0169963	-0.271054	3.49442	0.0094826
LINC01309	0.450546	1.36872	3.98513	0.000475816	0.0169963	0.861918	3.49401	0.0094826
ZNF75D	-0.18914	4.33071	-3.92189	0.000478055	0.0170424	0.783528	-3.49276	0.00950835
ESYT1	0.29259	3.07253	3.95488	0.000480228	0.0170649	0.901194	3.49155	0.00952091
PIAS1	-0.175382	7.98915	-3.83128	0.000480726	0.0170649	0.391717	-3.49127	0.00952091
MAGI2-AS3	-0.118572	5.48388	-3.59644	0.00048153	0.0170649	-0.480353	-3.49083	0.00952091
TMEM254	0.169928	4.02019	3.77431	0.000484406	0.017111	0.322594	3.48923	0.00954661
DHRS4-AS1	0.1512	5.40644	4.04049	0.000485315	0.017111	1.10589	3.48873	0.00954661
ANXA11	0.776707	-0.267485	3.67489	0.000485737	0.017111	-0.749452	3.4885	0.00954661
SERPINE3	0.36028	3.82685	3.59295	0.000487358	0.017111	-0.305065	3.48761	0.00954661
TAPT1	-0.129142	5.45392	-4.13883	0.000488292	0.017111	1.41343	-3.4871	0.00954661
RB1CC1	-0.18041	7.4381	-4.03667	0.000488533	0.017111	1.00845	-3.48697	0.00954661
LINC02069	0.320575	0.456219	3.59163	0.000489573	0.0171141	-0.263479	3.4864	0.00954836
MPDZ	-0.205542	6.82322	-3.77639	0.000493004	0.0172007	0.259651	-3.48453	0.00959664
OGFRP1	0.297941	3.26523	4.01739	0.000495182	0.0172433	1.10855	3.48335	0.00962041
AMMECR1	-0.153462	6.45141	-3.88939	0.000496688	0.0172623	0.606508	-3.48254	0.00963103
METRN	0.407087	3.67898	3.8669	0.000499055	0.0173112	0.616173	3.48126	0.00965829
LINC01170	-0.228154	3.2784	-3.58483	0.000501148	0.017323	-0.343224	-3.48014	0.00966491
ASCC3	-0.157007	7.38052	-4.04058	0.000501322	0.017323	1.06636	-3.48005	0.00966491
MAP2K4	-0.126853	6.91116	-4.14011	0.000504335	0.0173938	1.31897	-3.47844	0.00970438
AJ011931.1	-0.229074	0.475704	-3.58193	0.000506152	0.0174231	-0.259253	-3.47748	0.00972072
CCDC65	0.298218	4.34973	3.82975	0.000508519	0.0174711	0.493223	3.47623	0.00974753
AL109936.6	0.335331	3.30995	3.66251	0.000512279	0.0175668	-0.0405443	3.47425	0.00980091
NBPF10	-0.380428	0.601146	-4.20472	0.000515345	0.0176383	1.50184	-3.47265	0.00984082
UACA	-0.215733	4.44922	-3.5758	0.000516915	0.0176492	-0.486768	-3.47183	0.00984688
KMT2C	-0.153769	8.48036	-3.86378	0.000517623	0.0176492	0.482461	-3.47147	0.00984688
AKAP12	0.746195	3.592	3.61262	0.000528414	0.0179703	-0.183869	3.46592	0.010026
ZNF292	-0.178527	8.72755	-3.56903	0.000529036	0.0179703	-0.627671	-3.46561	0.010026
OTUD7B	-0.130271	5.70177	-3.78969	0.000532464	0.0179972	0.331044	-3.46387	0.0100411
THNSL1	0.247511	2.76951	4.70361	0.000532644	0.0179972	3.51552	3.46378	0.0100411
BSN-DT	0.210971	1.15178	3.56694	0.000532829	0.0179972	-0.297623	3.46369	0.0100411
NETO1	-0.182613	10.2674	-3.57272	0.000535477	0.0180262	-0.338014	-3.46235	0.0100572
SMC5	-0.12469	6.86141	-4.12986	0.000535689	0.0180262	1.40562	-3.46225	0.0100572
ZNF549	-0.120204	4.14634	-3.564	0.000538221	0.0180776	-0.491751	-3.46098	0.0100859
IRF1	0.301797	2.52036	3.56088	0.000543987	0.0182043	-0.322348	3.45811	0.0101566
RPAP1	0.166477	3.56112	3.76913	0.000544014	0.0182043	0.302044	3.45809	0.0101566
AC018647.3	-0.348665	0.0939473	-3.55927	0.000547004	0.0182374	-0.326738	-3.45662	0.0101751
AC096642.1	-0.27715	0.854702	-3.55922	0.000547085	0.0182374	-0.31353	-3.45658	0.0101751
ATP13A2	0.17749	4.57743	3.66847	0.000548045	0.0182374	-0.00281676	3.4561	0.0101751
RAB11FIP2	-0.154216	5.33489	-3.9513	0.000549199	0.0182421	0.835803	-3.45554	0.0101777
ACVR2A	-0.15932	6.25788	-3.89957	0.000558406	0.01849	0.658005	-3.45105	0.010316
TRPM7	-0.13774	6.4865	-4.79299	0.000558831	0.01849	3.74981	-3.45085	0.010316
HOOK1	-0.197655	7.36205	-4.19457	0.000559743	0.01849	1.50997	-3.45041	0.010316
PGAP1	-0.138301	6.83102	-4.13878	0.000562797	0.0185568	1.35115	-3.44894	0.0103533
FRMD6-AS1	0.282802	1.49198	4.08117	0.000563971	0.0185616	1.25108	3.44837	0.0103559
AFDN	-0.183779	7.08312	-4.12823	0.000567454	0.0186421	1.36699	-3.44671	0.0104009
CUL3	-0.104832	7.13359	-3.78647	0.000569244	0.0186669	0.298577	-3.44586	0.0104147
ANK3	-0.175568	10.794	-3.84173	0.00057183	0.0187176	0.408797	-3.44464	0.0104429
AC018697.1	-0.251212	2.72455	-3.54549	0.00057333	0.0187224	-0.462428	-3.44393	0.0104457
AC006141.1	-0.273019	2.21142	-4.33583	0.000574058	0.0187224	2.11613	-3.44358	0.0104457
AP001266.2	0.316424	4.74445	3.83617	0.000577879	0.0188129	0.508445	3.44179	0.0104962
RIPOR1	0.126114	5.03857	4.29912	0.000585674	0.0190323	1.96504	3.43816	0.0106186
CLASP1	-0.163106	8.5095	-3.91606	0.000588893	0.0191024	0.654094	-3.43668	0.0106577
MYCBP2	-0.118738	8.23905	-3.79165	0.000589992	0.0191036	0.261577	-3.43617	0.0106583
WAC	-0.105035	7.8731	-3.53419	0.000595826	0.0192579	-0.738062	-3.43351	0.0107444
RSF1	-0.112759	7.45865	-3.88443	0.000600109	0.0193616	0.536583	-3.43156	0.0108023
PHYKPL	0.196913	5.44353	3.59183	0.000604948	0.0194661	-0.253399	3.42939	0.0108606
SMAP1	-0.0859824	6.73785	-4.09756	0.000605511	0.0194661	1.18592	-3.42913	0.0108606
AP000350.6	1.49553	0.12592	3.61216	0.000607551	0.0194969	-0.783107	3.42822	0.0108777
CHD8	-0.10182	5.71374	-3.84473	0.00060928	0.0195176	0.469355	-3.42745	0.0108893
POLR1C	0.250486	4.96928	3.68823	0.000612413	0.0195534	0.0458734	3.42606	0.0109093
AC073320.1	0.218973	1.70552	3.52568	0.000613309	0.0195534	-0.411463	3.42566	0.0109093
PCM1	-0.14072	8.64588	-4.02704	0.000613659	0.0195534	0.915492	-3.4255	0.0109093
LYRM1	0.102346	5.15768	3.52341	0.000618049	0.0196274	-0.658129	3.42357	0.0109506
RNF144A	-0.253066	4.92078	-4.10549	0.000618691	0.0196274	1.37623	-3.42329	0.0109506
BCDIN3D	0.18622	2.67022	4.21208	0.000620237	0.0196274	1.76108	3.42261	0.0109506
AC008105.1	0.283818	2.03816	4.1876	0.000621247	0.0196274	1.64809	3.42216	0.0109506
RIMS2	-0.156356	11.2462	-3.59623	0.00062143	0.0196274	-0.293189	-3.42208	0.0109506
YTHDC1	-0.201242	6.6555	-4.99766	0.000622625	0.0196307	4.60554	-3.42156	0.0109524
AHCTF1	-0.130181	6.06435	-4.19497	0.000627879	0.0197617	1.56414	-3.41928	0.0110255
JAZF1	-0.190254	7.16588	-3.54991	0.000629036	0.0197636	-0.403704	-3.41878	0.0110266
BBS9	-0.193034	6.902	-3.85137	0.000631946	0.0198204	0.474806	-3.41752	0.0110583
AC091132.2	0.361872	1.61366	3.70468	0.00063553	0.0198982	-0.0623289	3.41598	0.0111016
GSK3B	-0.119557	8.05452	-3.90129	0.000638	0.0199082	0.595603	-3.41492	0.0111072
TBC1D15	-0.133485	5.79936	-3.69313	0.000638851	0.0199082	0.0150855	-3.41456	0.0111072
PCAT1	-0.385908	1.08025	-3.5135	0.000639168	0.0199082	-0.446693	-3.41443	0.0111072
SASS6	-0.15701	5.07108	-3.77938	0.000641839	0.019928	0.30418	-3.41329	0.0111183
AP001062.1	-0.225181	0.970434	-3.51218	0.000642017	0.019928	-0.450759	-3.41321	0.0111183
TRIM47	0.371854	0.21067	3.51096	0.000644676	0.0199761	-0.543485	3.41209	0.0111451
INO80D	-0.0884282	5.77381	-3.51023	0.000646275	0.0199912	-0.768859	-3.41141	0.0111535
FAM126B	-0.126244	6.5422	-4.14955	0.000649045	0.0200196	1.34888	-3.41025	0.0111694
AC007114.2	0.296274	3.50629	4.18914	0.000649416	0.0200196	1.68346	3.41009	0.0111694
AC020915.2	0.200895	3.80069	3.68486	0.000652368	0.0200762	0.0492554	3.40885	0.011201
GOLM1	0.105412	5.14197	3.50475	0.00065836	0.020226	-0.723154	3.40636	0.0112846
USP25	-0.161969	5.94704	-3.57435	0.000666229	0.0204163	-0.326811	-3.40311	0.0113907
AC132803.1	-0.484461	4.64851	-3.77234	0.000667509	0.0204163	0.301336	-3.40259	0.0113907
ANO2	-0.572764	4.56091	-3.58953	0.00066878	0.0204163	-0.248191	-3.40207	0.0113907
HDAC10	0.20985	2.01613	3.49997	0.000669088	0.0204163	-0.491667	3.40194	0.0113907
HERC3	-0.213956	6.44345	-3.54998	0.000671472	0.0204408	-0.405789	-3.40097	0.0114044
ZNF655	-0.123545	5.55866	-4.244	0.000672162	0.0204408	1.74091	-3.40069	0.0114044
PDGFD	-0.7634	2.31384	-3.75497	0.000673591	0.0204479	0.181568	-3.40011	0.0114084
ATAD2B	-0.135282	6.90006	-3.61401	0.000674669	0.0204479	-0.237643	-3.39967	0.0114084
AC008443.4	0.439749	1.24486	3.52502	0.000675848	0.0204492	-0.714727	3.39919	0.0114091
CLINT1	-0.0803536	5.25548	-3.49509	0.000680205	0.0205465	-0.785187	-3.39744	0.0114634
AC010551.3	0.344736	5.54878	3.69315	0.000681712	0.0205576	0.0492582	3.39683	0.0114695
NRCAM	-0.167793	8.6936	-3.62585	0.000688198	0.0207185	-0.231021	-3.39424	0.0115593
GPBP1	-0.10705	7.89301	-3.49	0.000691989	0.0207978	-0.878424	-3.39273	0.0116036
ENKUR	0.318922	2.21222	4.23303	0.000694796	0.0208474	1.81238	3.39162	0.0116312
ERCC6L2	-0.145912	6.87369	-3.65441	0.000698524	0.0208943	-0.139628	-3.39016	0.0116574
EHBP1	-0.16448	8.61681	-3.71328	0.00069868	0.0208943	0.00974187	-3.3901	0.0116574
CCDC91	-0.147389	8.14041	-3.64463	0.000702868	0.0209846	-0.186435	-3.38846	0.0117078
RNF19A	-0.12327	6.01546	-4.21817	0.000706814	0.0210315	1.70035	-3.38692	0.0117339
ENTPD3-AS1	0.152945	4.82373	3.48369	0.000706862	0.0210315	-0.752432	3.3869	0.0117339
IQGAP2	-0.335034	3.99683	-3.96228	0.000710664	0.0210315	0.90682	-3.38543	0.0117339
KIDINS220	-0.133436	6.80934	-3.59609	0.000711536	0.0210315	-0.305779	-3.3851	0.0117339
DBNDD1	0.471834	0.924854	3.54391	0.000711781	0.0210315	-0.69396	3.385	0.0117339
AC127024.4	0.253277	0.798845	3.4814	0.000712336	0.0210315	-0.549095	3.38479	0.0117339
CLOCK	-0.101538	7.10142	-3.99911	0.000712614	0.0210315	0.838527	-3.38468	0.0117339
FAM172A	-0.119896	7.97869	-3.71579	0.000716097	0.0210795	0.0406132	-3.38334	0.0117607
GOLGA8N	-0.335468	1.15827	-4.25789	0.000717191	0.0210795	1.89323	-3.38292	0.0117607
GPC5	-0.434959	4.98248	-4.02734	0.000717754	0.0210795	1.03725	-3.38271	0.0117607
ARFIP1	-0.124897	6.3135	-4.00952	0.000720076	0.0210892	1.01792	-3.38182	0.0117661
CSNK1D	-0.0844138	5.31267	-3.47804	0.000720427	0.0210892	-0.839669	-3.38168	0.0117661
LAT2	0.305783	2.40429	3.84202	0.000722258	0.0211084	0.505293	3.38099	0.0117769
AC092040.1	0.366974	3.97121	3.59783	0.000728075	0.0212358	-0.211635	3.37878	0.0118479
AP001767.3	0.349594	3.16233	3.77741	0.000728974	0.0212358	0.326095	3.37844	0.0118479
MACO1	-0.0899809	6.90379	-3.47392	0.000730489	0.0212456	-0.915995	-3.37787	0.0118534
ZNF577	-0.122713	4.67629	-3.94958	0.000734299	0.0213219	0.822611	-3.37644	0.011896
CXCR5	0.349507	2.05599	3.76356	0.000735689	0.0213279	0.24107	3.37592	0.0118993
SCO1	0.124627	4.13484	3.47096	0.000737781	0.0213541	-0.739853	3.37514	0.011914
KDM6A	-0.152675	6.93799	-3.75985	0.000739904	0.0213566	0.149838	-3.37435	0.0119153
PPFIA2	-0.156504	9.37418	-3.77987	0.00074024	0.0213566	0.196961	-3.37422	0.0119153
LRWD1	0.265859	2.49652	3.90334	0.000744734	0.0214519	0.728775	3.37256	0.0119685
AKAP6	-0.142563	8.90797	-3.66298	0.000747157	0.0214873	-0.137124	-3.37166	0.0119883
AC010173.1	0.618879	-0.938466	3.5512	0.000750377	0.0215159	-1.18215	3.37048	0.0120042
LINC02506	1.51963	1.59437	3.57057	0.000750919	0.0215159	-0.498242	3.37028	0.0120042
PTPRN2	-0.165285	6.52249	-3.46538	0.000751737	0.0215159	-0.934154	-3.36998	0.0120042
LINC00539	0.276534	3.59323	3.53152	0.00075295	0.0215164	-0.413186	3.36954	0.0120045
KANSL3	-0.129381	5.22419	-3.65795	0.000760887	0.0217088	-0.0683522	-3.36664	0.0121118
ARHGAP20	-0.221299	3.68308	-3.46016	0.000764999	0.0217185	-0.790049	-3.36516	0.0121173
FO393401.1	0.382752	3.35307	3.48219	0.000766823	0.0217185	-0.566373	3.3645	0.0121173
ATXN7	-0.119473	6.49571	-3.69504	0.000767184	0.0217185	-0.0168142	-3.36437	0.0121173
ITGA5	0.363437	3.32475	3.68731	0.000767306	0.0217185	0.0558564	3.36433	0.0121173
DUBR	-0.13003	4.2056	-3.45882	0.000768447	0.0217185	-0.820244	-3.36392	0.0121173
ACP2	0.340089	2.7165	3.85872	0.000768467	0.0217185	0.598305	3.36391	0.0121173
RRP7A	0.19699	3.75281	3.45689	0.000773438	0.0217831	-0.722913	3.36213	0.0121533
AL137024.1	0.649369	0.652137	3.55721	0.000775156	0.0217831	-0.659421	3.36152	0.0121533
EXOC2	-0.161914	6.66297	-3.69622	0.000775891	0.0217831	-0.0215085	-3.36126	0.0121533
AL359317.1	0.203998	1.93558	3.45473	0.000779043	0.0217831	-0.623727	3.36014	0.0121533
FGF12	-0.195188	9.91837	-3.49412	0.000780301	0.0217831	-0.603094	-3.35969	0.0121533
SLC27A5	0.157318	4.06042	3.69212	0.000781347	0.0217831	0.0713093	3.35932	0.0121533
SMC3	-0.154994	6.48637	-3.50505	0.000781923	0.0217831	-0.545962	-3.35912	0.0121533
WDR26	-0.128923	5.96308	-3.89943	0.000782272	0.0217831	0.564457	-3.35899	0.0121533
CBL	-0.132	4.98521	-4.01293	0.000782776	0.0217831	1.00538	-3.35881	0.0121533
KIAA1549L	-0.287644	4.2309	-3.56092	0.000782851	0.0217831	-0.326964	-3.35879	0.0121533
EDEM3	-0.139529	5.98768	-3.60127	0.000784342	0.0217909	-0.271943	-3.35826	0.0121576
DMTF1	-0.1631	6.41079	-3.7617	0.000789183	0.0218469	0.225017	-3.35656	0.0121889
PSG2	0.410891	2.97352	3.74739	0.000789746	0.0218469	0.24752	3.35636	0.0121889
SIPA1L2	-0.160092	5.73739	-4.00363	0.000790064	0.0218469	0.904502	-3.35625	0.0121889
LACTB2	0.119073	4.20426	3.4501	0.000791211	0.0218469	-0.790428	3.35585	0.0121889
ATRNL1	-0.207626	9.61342	-3.46485	0.000793147	0.0218668	-0.671371	-3.35518	0.0122
ZNF782	-0.159089	5.79892	-3.68676	0.000795043	0.0218856	-0.025517	-3.35451	0.0122104
AC073343.2	0.212173	4.86391	3.46097	0.000803099	0.0220736	-0.617748	3.35172	0.0123153
PTPN4	-0.128005	7.55048	-3.56096	0.000805705	0.0221114	-0.42215	-3.35083	0.0123365
MBTPS1	-0.119201	6.33552	-3.58713	0.000809764	0.0221778	-0.322702	-3.34944	0.0123735
RAPGEFL1	0.280943	3.18113	4.00531	0.000810588	0.0221778	1.06827	3.34915	0.0123735
C2orf50	0.231329	1.10847	3.4418	0.000813483	0.0222028	-0.661134	3.34817	0.0123874
THOC6	0.378182	1.23402	3.84996	0.000813966	0.0222028	0.354443	3.348	0.0123874
ECPAS	-0.11803	6.45692	-3.54874	0.000816508	0.0222321	-0.430705	-3.34714	0.0124038
NMRAL1	0.135469	4.09091	3.43993	0.000818563	0.0222321	-0.819101	3.34644	0.0124038
SH3BP5	-0.14745	5.32879	-3.43987	0.000818745	0.0222321	-0.962789	-3.34638	0.0124038
TUT4	-0.128668	8.64545	-3.58055	0.000820503	0.0222463	-0.392739	-3.34578	0.0124117
COG6	-0.126475	5.95043	-4.00214	0.000822687	0.0222719	0.942636	-3.34505	0.012426
GAB1	-0.148664	5.06302	-3.43638	0.000828333	0.0223911	-0.964931	-3.34315	0.0124925
PIGN	-0.202851	6.91875	-3.77807	0.000829677	0.0223938	0.21901	-3.3427	0.012494
UBN2	-0.121274	6.42751	-3.74139	0.000834844	0.0224995	0.108927	-3.34098	0.012553
TIMP3	0.722533	1.26284	3.46693	0.000836859	0.0225069	-0.825132	3.34031	0.0125571
TMEM131	-0.16015	7.10319	-3.56716	0.000837617	0.0225069	-0.389697	-3.34006	0.0125571
LINC00486	0.558377	4.34956	5.00361	0.000840301	0.0225454	4.66969	3.33917	0.0125786
UNC5CL	-0.405607	0.397651	-3.47798	0.000843779	0.0225794	-0.981191	-3.33802	0.0125975
D2HGDH	0.1469	3.44033	3.43073	0.000844076	0.0225794	-0.789945	3.33792	0.0125975
CRB1	-0.182384	6.03696	-3.62135	0.000845822	0.0225925	-0.202368	-3.33735	0.0126049
CELF2	-0.153043	8.27689	-3.61836	0.000850908	0.0226795	-0.297543	-3.33568	0.0126534
GBA	0.180992	3.16201	3.80672	0.000851598	0.0226795	0.429851	3.33546	0.0126534
ATG2B	-0.163078	5.98657	-3.67984	0.000857734	0.0227586	-0.0507933	-3.33346	0.0126976
C2CD5	-0.131112	7.13041	-3.60236	0.000857789	0.0227586	-0.300404	-3.33344	0.0126976
GPC1	0.301247	2.51524	3.86721	0.000858364	0.0227586	0.610128	3.33325	0.0126976
AL031587.2	0.347053	2.72799	3.64651	0.000865553	0.0228874	-0.0888901	3.33093	0.0127694
ARMCX5-GPRASP2	-0.177601	5.75576	-3.70202	0.000866626	0.0228874	0.013415	-3.33059	0.0127694
BAALC-AS1	-0.417737	2.21621	-4.1435	0.000867032	0.0228874	1.53071	-3.33046	0.0127694
AL031963.3	0.427866	1.43792	4.02861	0.000870616	0.0229267	1.02933	3.32931	0.0127913
SEM1	-0.13061	7.32199	-3.42127	0.000871069	0.0229267	-1.08541	-3.32916	0.0127913
VPS13A	-0.16487	6.92264	-3.81028	0.0008731	0.0229424	0.25878	-3.32852	0.0128001
ACAP1	0.33193	4.50448	4.38104	0.00087504	0.0229424	2.32475	3.3279	0.0128001
CMTM3	0.393735	0.476595	3.96845	0.00087602	0.0229424	0.784739	3.32759	0.0128001
CAPRIN1	-0.0887446	6.01725	-4.09242	0.000876762	0.0229424	1.16907	-3.32735	0.0128001
TTC21B	-0.148745	6.31191	-3.66902	0.000886007	0.0230549	-0.0911843	-3.32443	0.0128628
GPATCH2L	-0.0603431	6.50773	-3.416	0.000886462	0.0230549	-1.08294	-3.32428	0.0128628
KPNA1	-0.0961561	6.85755	-3.69192	0.000886463	0.0230549	-0.0695682	-3.32428	0.0128628
AC005592.1	-0.245981	0.599956	-3.41585	0.000886911	0.0230549	-0.727681	-3.32414	0.0128628
CCDC22	0.112496	3.29095	3.41566	0.000887465	0.0230549	-0.818882	3.32397	0.0128628
AC008115.2	0.419191	3.24421	3.70692	0.000899864	0.0233402	0.116707	3.3201	0.013022
CLEC4F	-0.425581	-0.63252	-3.41084	0.00090181	0.0233402	-0.772488	-3.31949	0.013022
CEP44	-0.147134	5.64235	-3.89137	0.000902336	0.0233402	0.560269	-3.31933	0.013022
AC104083.1	-0.349282	3.27598	-3.42343	0.000904912	0.0233732	-0.737828	-3.31853	0.0130404
FBXO25	-0.124674	5.15203	-3.81929	0.000907405	0.023374	0.356847	-3.31777	0.0130409
STAM2	-0.132784	4.90925	-4.11626	0.000907537	0.023374	1.34905	-3.31773	0.0130409
AC012178.1	-0.37024	3.57281	-3.40785	0.000910782	0.023424	-0.958276	-3.31673	0.0130688
LINC02246	-0.288202	2.20969	-4.14881	0.00091659	0.0235398	1.55438	-3.31495	0.0131334
CNOT4	-0.0956492	6.99725	-3.51755	0.000925945	0.0237461	-0.551949	-3.31211	0.0132485
FRY	-0.149382	8.91516	-3.62434	0.000927369	0.0237488	-0.274129	-3.31168	0.01325
WDR83	0.169808	4.0978	3.85617	0.000931901	0.0237998	0.532343	3.31032	0.0132785
DMXL1	-0.123685	7.39956	-4.13228	0.000932005	0.0237998	1.32539	-3.31029	0.0132785
AL031768.2	0.272043	3.8922	3.81786	0.000934443	0.0238283	0.441237	3.30956	0.0132943
HIBADH	-0.122846	7.17476	-3.67648	0.000944938	0.0240618	-0.127988	-3.30643	0.0134246
MAFB	0.648243	0.503539	3.40847	0.000947588	0.0240952	-0.953148	3.30564	0.0134433
CRYM	0.817457	1.38561	3.57025	0.000949662	0.0241139	-0.413037	3.30503	0.0134537
NUCKS1	-0.177061	7.78128	-3.43661	0.00095244	0.0241428	-0.771667	-3.30421	0.0134698
RBM25	-0.145638	7.56292	-3.52246	0.000954624	0.0241428	-0.555259	-3.30357	0.0134698
CSMD3	-0.282701	7.75131	-3.59341	0.000954825	0.0241428	-0.31438	-3.30351	0.0134698
CEP350	-0.114663	7.18603	-3.64388	0.000969247	0.0244306	-0.224476	-3.2993	0.0136304
POMZP3	0.247391	4.16051	3.71099	0.000969344	0.0244306	0.117845	3.29928	0.0136304
TPPP	-0.166208	2.88862	-3.38856	0.000970846	0.0244306	-0.9235	-3.29884	0.0136304
NIBAN3	0.334838	1.53987	3.82991	0.000971998	0.0244306	0.421625	3.29851	0.0136304
LINC01933	-0.208723	6.33608	-3.69328	0.000973943	0.0244306	0.0135084	-3.29795	0.0136304
TRIM44	-0.13297	7.64916	-3.4291	0.000974346	0.0244306	-0.782386	-3.29783	0.0136304
DLG3	-0.122148	4.78469	-3.82207	0.000978266	0.0244948	0.396629	-3.2967	0.0136662
NBPF3	-0.161596	3.98146	-3.95592	0.000985698	0.0246465	0.863382	-3.29458	0.0137509
USP3	-0.151794	6.99646	-3.79703	0.000987611	0.0246601	0.19947	-3.29403	0.0137584
AC008467.1	-0.442277	1.05983	-4.28006	0.000989572	0.0246624	1.96553	-3.29347	0.0137597
NCKAP1	-0.148513	7.41406	-3.68207	0.00099044	0.0246624	-0.118578	-3.29323	0.0137597
HDGFL3	-0.114164	6.72748	-3.68669	0.000996892	0.0247322	-0.0646747	-3.2914	0.0137987
PANK3	-0.157772	5.22156	-3.88132	0.000999308	0.0247322	0.566196	-3.29072	0.0137987
PHYHIPL	-0.116779	8.41427	-3.58721	0.000999723	0.0247322	-0.379874	-3.2906	0.0137987
CDK6	-0.335199	-0.0999005	-3.37923	0.0010012	0.0247322	-0.86061	-3.29019	0.0137987
HHLA2	0.293328	-0.00788344	3.37846	0.00100376	0.0247322	-0.87774	3.28947	0.0137987
TIRAP	0.193535	3.17339	3.79052	0.00100406	0.0247322	0.36035	3.28939	0.0137987
BCAM	0.480926	-0.0734325	3.66744	0.00100525	0.0247322	-0.480141	3.28905	0.0137987
AC025171.2	0.529561	0.113726	3.52765	0.00100542	0.0247322	-0.808344	3.28901	0.0137987
POT1	-0.123393	5.93585	-3.79325	0.00100637	0.0247322	0.281191	-3.28874	0.0137987
AC002553.1	-0.160273	1.31956	-3.37725	0.00100776	0.0247322	-0.843065	-3.28835	0.0137987
NRG1	-0.178965	10.1108	-3.37707	0.00100836	0.0247322	-1.21052	-3.28818	0.0137987
UBR3	-0.126935	8.23172	-3.70757	0.00101085	0.0247597	-0.0988724	-3.28749	0.013814
HDAC11	0.134594	2.77367	3.37513	0.00101483	0.0248233	-0.895559	3.28638	0.0138495
KCTD9	-0.124128	4.62328	-3.37412	0.00101822	0.024869	-1.11037	-3.28544	0.013875
RAD23B	-0.122021	6.56589	-4.83381	0.0010198	0.024869	3.91746	-3.28501	0.013875
AC021491.1	0.431481	0.922587	3.4176	0.00102167	0.024869	-1.01428	3.28449	0.013875
RPS6KA3	-0.142747	7.54871	-3.92973	0.00102356	0.024869	0.562855	-3.28397	0.013875
SKP2	-0.158442	3.77831	-3.63402	0.0010236	0.024869	-0.111763	-3.28396	0.013875
NECTIN1-AS1	0.322757	3.90413	3.39236	0.0010264	0.0248791	-0.805959	3.28319	0.0138806
SAMD12	-0.17122	7.88097	-3.48069	0.00102678	0.0248791	-0.669006	-3.28308	0.0138806
ARID4A	-0.144291	7.09932	-3.45294	0.00103803	0.025115	-0.727614	-3.28001	0.0140122
LPAR6	0.332026	3.88094	3.45128	0.00103931	0.025115	-0.638341	3.27966	0.0140122
AC010978.1	0.310107	1.07527	3.74824	0.0010408	0.0251174	0.198407	3.27926	0.0140136
GRN	0.307285	3.46787	3.63296	0.00104239	0.0251219	-0.104197	3.27883	0.0140161
KPNA5	-0.098694	6.41393	-3.93087	0.0010439	0.0251248	0.610845	-3.27842	0.0140177
C17orf67	-0.239362	4.12993	-3.36599	0.00104583	0.0251376	-1.10219	-3.2779	0.0140248
SCN2A	-0.143786	7.47136	-3.89093	0.00104916	0.025184	0.474082	-3.277	0.0140507
RPS26	0.459341	5.95783	3.41706	0.00105334	0.0252328	-0.796135	3.27588	0.0140779
NUP205	-0.12062	4.90077	-3.83136	0.00105427	0.0252328	0.403392	-3.27563	0.0140779
WDR33	-0.0925473	6.72842	-3.54014	0.0010554	0.0252328	-0.501719	-3.27533	0.0140779
RAI1-AS1	0.262605	1.64945	3.7457	0.00105756	0.0252509	0.247993	3.27475	0.014088
AC105052.5	-0.339161	0.5848	-3.76937	0.00106259	0.0252957	0.177071	-3.27341	0.0141131
RARRES1	0.313846	3.22869	3.41987	0.00106317	0.0252957	-0.734008	3.27325	0.0141131
HSF2	-0.159039	5.33113	-3.5631	0.00106489	0.0252957	-0.360048	-3.2728	0.0141131
ACSBG2	0.293655	2.18436	3.9125	0.00106505	0.0252957	0.771278	3.27275	0.0141131
AFF4	-0.122495	7.13099	-3.49578	0.00106724	0.0253143	-0.628613	-3.27217	0.0141234
PGM3	-0.16773	4.66786	-3.93814	0.0010703	0.0253535	0.819218	-3.27136	0.0141453
LINC01237	-0.388414	2.12736	-4.17678	0.00107804	0.025496	1.64428	-3.26933	0.0142248
TRIM33	-0.118503	7.11609	-3.53342	0.00107996	0.025496	-0.511237	-3.26882	0.0142248
ACKR4	0.352185	2.12262	3.35793	0.00108092	0.025496	-0.981276	3.26857	0.0142248
CDC73	-0.124042	7.0538	-3.73989	0.00108198	0.025496	0.0391309	-3.26829	0.0142248
LINC00159	-0.201469	4.12373	-3.35453	0.00108594	0.0255559	-1.13251	-3.26726	0.0142582
AL121929.3	0.341287	2.19211	3.36799	0.00108856	0.025584	-0.944198	3.26658	0.0142739
KIAA1109	-0.141091	7.82063	-3.62856	0.00109206	0.0256327	-0.283136	-3.26567	0.0143011
KIAA1958	-0.144134	7.4942	-3.57973	0.00110322	0.025861	-0.430288	-3.26279	0.0144284
ELP6	0.200278	3.9525	3.34898	0.0011059	0.02589	-1.06651	3.2621	0.0144446
POLE2	0.259448	5.06252	3.64877	0.00111147	0.0259866	-0.111284	3.26068	0.0144985
ERCC4	0.120669	3.84305	3.93567	0.00111915	0.0261323	0.797188	3.25872	0.0145798
FLYWCH2	0.180584	4.57293	3.50927	0.00112125	0.0261476	-0.48194	3.25819	0.0145883
ZSCAN1	0.212993	2.84383	3.79897	0.00112598	0.0262238	0.40588	3.257	0.0146309
MARVELD1	0.284722	1.22546	3.99327	0.00112744	0.0262239	0.978128	3.25663	0.0146309
HIST1H2AC	-0.255795	6.56415	-3.34186	0.00113199	0.0262957	-1.31963	-3.25549	0.0146709
CORIN	-0.237314	3.40247	-4.18124	0.00113437	0.026317	1.63986	-3.25489	0.0146829
CXCL17	0.27889	3.29864	3.58905	0.00113837	0.0263759	-0.236281	3.25389	0.0147157
SESN3	-0.209493	7.19837	-3.45424	0.00114194	0.0263854	-0.748843	-3.253	0.014721
COL16A1	0.366418	1.77793	3.4262	0.00114219	0.0263854	-0.812014	3.25294	0.014721
GPD1	0.287167	2.11175	3.33885	0.00114318	0.0263854	-0.954614	3.25269	0.014721
ANAPC4	-0.142198	4.94167	-3.63916	0.00114982	0.0265048	-0.151545	-3.25104	0.0147876
IBTK	-0.0920091	6.8529	-3.59413	0.00116007	0.0266791	-0.379969	-3.24852	0.0148849
RAB3IP	-0.148128	8.13104	-3.48689	0.00116035	0.0266791	-0.650856	-3.24845	0.0148849
MAGI2	-0.155631	9.73917	-3.50761	0.0011711	0.0267869	-0.608648	-3.24583	0.014945
AP1G1	-0.0692508	6.02957	-3.33135	0.00117156	0.0267869	-1.32588	-3.24572	0.014945
RASA3	-0.321838	2.95163	-3.3753	0.00117296	0.0267869	-0.861339	-3.24538	0.014945
AC079193.2	-0.255541	2.15037	-4.00986	0.00117342	0.0267869	1.08571	-3.24526	0.014945
SRD5A3	0.185821	3.22866	3.85871	0.00117368	0.0267869	0.584835	3.2452	0.014945
NBAS	-0.139506	7.44121	-3.7052	0.00117396	0.0267869	-0.0807299	-3.24513	0.014945
FAM91A1	-0.13652	4.60888	-3.48297	0.00117593	0.0267978	-0.576726	-3.24466	0.0149511
ATF4	-0.300968	5.60984	-3.33436	0.00118391	0.0269456	-1.00848	-3.24273	0.0150335
AQP11	0.201614	4.71245	3.62868	0.00118644	0.026969	-0.174885	3.24212	0.0150466
AC025580.3	0.327715	2.67026	3.40193	0.00118888	0.0269905	-0.809282	3.24153	0.0150586
PAMR1	0.50965	0.849955	3.66712	0.00119242	0.0270366	-0.0805161	3.24069	0.0150843
FMR1-AS1	0.375601	0.825281	3.45075	0.00119566	0.0270678	-0.874017	3.23991	0.0151017
ZNF654	-0.115973	7.12664	-3.32482	0.0011968	0.0270678	-1.37322	-3.23964	0.0151017
SYCP3	0.326711	2.47342	3.52119	0.00119931	0.0270906	-0.453343	3.23904	0.0151145
AC124854.1	-0.343249	4.04563	-3.90698	0.00120157	0.0271075	0.710789	-3.23851	0.0151239
SMC1B	0.436859	1.79376	3.47963	0.00120585	0.02717	-0.644217	3.23749	0.0151588
AC092123.1	0.182453	1.37292	3.32192	0.00120814	0.0271878	-0.992273	3.23695	0.0151687
NAA50	-0.115827	5.47863	-3.81301	0.00121896	0.0273969	0.247448	-3.23441	0.0152854
BBX	-0.148628	7.41154	-3.5321	0.00122308	0.0274553	-0.562311	-3.23344	0.0153179
RFX1	0.161846	4.58164	3.49952	0.00122679	0.0274715	-0.520462	3.23258	0.015327
GALNT12	0.23033	2.18742	3.84708	0.00122686	0.0274715	0.566066	3.23256	0.015327
PHKA1	-0.191637	3.94901	-3.7898	0.00123146	0.0275404	0.350031	-3.23149	0.0153654
PHKG1	0.174593	3.17883	3.67973	0.00124126	0.0276625	0.0343449	3.22923	0.0154335
LYRM9	0.205438	3.304	3.31352	0.00124165	0.0276625	-1.10752	3.22914	0.0154335
LINC02675	0.526505	0.390373	3.53298	0.00124283	0.0276625	-0.566927	3.22886	0.0154335
COBLL1	-0.194306	6.48887	-3.66833	0.00124307	0.0276625	-0.126876	-3.22881	0.0154335
MORC2-AS1	0.241185	2.90589	3.68013	0.00124924	0.0277655	0.0389563	3.22739	0.015491
IPMK	-0.118716	5.60824	-3.52582	0.00125223	0.0277976	-0.510196	-3.22671	0.0155089
SUGCT	-0.188958	4.97557	-3.97189	0.00125472	0.0278186	0.810221	-3.22614	0.0155206
AC064805.2	0.582121	-0.191548	3.72533	0.00125935	0.0278681	-0.109875	3.22508	0.0155482
RAB15	0.2605	3.04938	3.64124	0.00126005	0.0278681	-0.0879852	3.22493	0.0155482
LRP4-AS1	0.474248	1.0657	3.43184	0.00126424	0.0279005	-0.876472	3.22398	0.0155663
PTPRK	-0.349545	4.47951	-3.86153	0.00126461	0.0279005	0.571815	-3.22389	0.0155663
QSER1	-0.109449	5.70164	-4.07707	0.00126997	0.0279843	1.11678	-3.22268	0.0156131
CUL1	-0.0901313	6.55782	-3.62356	0.00127817	0.0280972	-0.309267	-3.22084	0.0156761
TRAIP	0.187723	1.28919	3.30459	0.00127821	0.0280972	-1.03719	3.22083	0.0156761
KDM5A	-0.114243	6.38547	-3.58797	0.00128087	0.0281214	-0.40408	-3.22023	0.0156896
CYB5R3	0.183431	4.14183	3.53549	0.00128305	0.028135	-0.401971	3.21974	0.0156971
GALNT7	-0.171338	8.22937	-3.37293	0.00128904	0.0281803	-0.973222	-3.21841	0.0157224
HSCB	0.171874	4.15296	4.09213	0.00129004	0.0281803	1.34872	3.21819	0.0157224
DENND1B	-0.153752	6.68867	-3.39272	0.00129044	0.0281803	-0.906062	-3.2181	0.0157224
SMG1	-0.1366	6.07495	-3.83121	0.00129138	0.0281803	0.392638	-3.21789	0.0157224
LRBA	-0.137011	8.15095	-3.47896	0.00129305	0.0281826	-0.699149	-3.21752	0.0157237
SPATA45	0.270452	0.0656157	3.30037	0.00129587	0.0282099	-1.09339	3.21689	0.0157389
ARID5B	-0.180863	7.43904	-3.54097	0.00129759	0.0282132	-0.526811	-3.21651	0.0157408
CACNB2	-0.135053	9.55231	-3.40726	0.00129942	0.0282188	-0.909292	-3.21611	0.0157439
ASB6	0.184888	1.66681	3.29876	0.00130263	0.0282392	-1.06034	3.2154	0.0157553
AL357153.2	-0.203045	6.30646	-3.85816	0.0013035	0.0282392	0.447264	-3.21521	0.0157553
AP003170.3	0.2814	1.25146	3.51901	0.00130579	0.0282392	-0.557612	3.2147	0.0157553
[truncated: 17,171 more rows]

## Sheet: AC aging DEG
	logFC	AveExpr	t	P.Value	adj.P.Val	B	z.std	qval
[truncated: 18,003 more rows]

[truncated: 3 more sheets: HC aging DEG, MG aging DEG, RGC aging DEG]
