# Supplementary material for: Integrated multi-omics single cell atlas of the human retina
Source: Research Square preprint supplement (doi:10.21203/rs.3.rs-3471275/v1), 2023-11-16
Supplement: Supplementary file 12 [file 71c7d938a5807a1b79ce7006.xlsx]

## Sheet: Sheet1
Table S6. Differential gene expression analysis of GB compared to BB cells
symbol	baseMean	log2FoldChange	lfcSE	stat	pvalue	padj
KCTD3	123.63	-1.90059	0.0477093	-39.8369	0	0
AFF3	334.686	-3.13882	0.0697854	-44.9781	0	0
KLHL2	82.2903	-2.96601	0.0715108	-41.4765	0	0
DLG2	9297.81	2.00492	0.0468201	42.8216	0	0
CA10	2864.96	2.97291	0.0755205	39.3656	0	0
TCF4	576.068	-2.70221	0.0518214	-52.1447	0	0
ANK2	1017.88	1.49787	0.0408993	36.6235	1.21077e-293	2.28888e-290
AGAP1	2475.17	-1.62281	0.0458465	-35.3966	1.92712e-274	3.1877e-271
NRCAM	535.649	1.78715	0.0504975	35.3908	2.36686e-274	3.48007e-271
RUNX1T1	482.639	-1.59895	0.0452543	-35.3326	1.85357e-273	2.45283e-270
IQCJ-SCHIP1	1710.46	1.91737	0.0553561	34.637	7.00399e-263	8.4258e-260
PLCE1	23.7852	-3.98255	0.118389	-33.6396	4.4209e-248	4.87515e-245
MTSS1	76.7005	-2.84839	0.08483	-33.5776	3.55773e-247	3.6215e-244
KIF5C	239.267	-1.8443	0.0558115	-33.0452	1.82037e-239	1.72064e-236
PKP4	443.827	-1.84089	0.0558463	-32.9636	2.70344e-238	2.38498e-235
CADM3	196.907	-1.71832	0.0524309	-32.7729	1.43076e-235	1.18333e-232
TBX2	101.542	-3.80344	0.119997	-31.6962	1.7535e-220	1.36494e-217
PELI2	418.745	1.53514	0.0499609	30.7267	2.502e-207	1.83939e-204
PTPRD	1307.92	-1.76439	0.0574714	-30.7002	5.64846e-207	3.934e-204
FMN1	1577.9	1.86371	0.0608958	30.605	1.05159e-205	6.95783e-203
DGKB	733.935	-5.02735	0.16561	-30.3566	2.05636e-202	1.2958e-199
NUP93	195.684	-2.91086	0.0961091	-30.2871	1.69686e-201	1.02066e-198
HMGCLL1	120.908	-2.41143	0.0828092	-29.1204	1.98313e-186	1.14099e-183
CDH20	1471.3	3.31322	0.115098	28.786	3.21371e-182	1.77196e-179
EDIL3	861.435	2.16587	0.0768697	28.1758	1.15681e-174	6.12324e-172
AP001825.1	504.14	1.95832	0.0696754	28.1063	8.20109e-174	4.17404e-171
IGSF3	45.8966	-4.23055	0.150598	-28.0916	1.24016e-173	6.07814e-171
INTS6L	34.2379	-2.46501	0.0884296	-27.8753	5.31078e-171	2.50991e-168
PCDH9	2259.78	3.04071	0.110692	27.4701	4.00041e-166	1.82543e-163
TMTC2	826.594	2.09046	0.076114	27.4648	4.62323e-166	2.03931e-163
SGCD	451.072	-4.32578	0.159338	-27.1484	2.64816e-162	1.13042e-159
SORCS3	52.7226	-8.26293	0.305462	-27.0506	3.75831e-161	1.55418e-158
CADM2	3289.99	0.968714	0.0375944	25.7675	2.05109e-146	8.22488e-144
CTNNAL1	27.8556	-2.30544	0.0914199	-25.2181	2.53334e-140	9.85992e-138
OTX2-AS1	1681.46	1.35838	0.0540484	25.1326	2.18811e-139	8.27295e-137
MCC	607.257	1.83664	0.0741074	24.7835	1.35194e-135	4.9695e-133
CCDC136	270.145	-2.87778	0.116816	-24.6352	5.30162e-134	1.89612e-131
MPPED2	102.065	-3.44102	0.141742	-24.2766	3.46193e-130	1.20557e-127
ARL15	272.549	1.8235	0.0759107	24.0216	1.65349e-127	5.61043e-125
KHDRBS2	1060.51	1.89202	0.0793267	23.8509	9.90406e-126	3.27651e-123
AL161757.4	552.27	1.55198	0.0651579	23.8188	2.13304e-125	6.88453e-123
MAP3K5	191.709	2.96511	0.124707	23.7767	5.82007e-125	1.83374e-122
PTPRJ	164.394	2.57834	0.10924	23.6026	3.62693e-123	1.11617e-120
CDC42BPA	434.15	0.955282	0.0406852	23.4798	6.55908e-122	1.97264e-119
AC127526.2	14.9336	-5.80417	0.247699	-23.4323	2.00191e-121	5.88695e-119
CELF4	153.537	-1.77014	0.0758977	-23.3227	2.61108e-120	7.51139e-118
UTRN	50.971	6.4248	0.275649	23.3079	3.68622e-120	1.03787e-117
TNPO1	208.711	-1.11584	0.0484103	-23.0497	1.48148e-117	4.08425e-115
FGF12	877.017	-1.35035	0.059341	-22.7558	1.25861e-114	3.39903e-112
MALT1	69.9636	-1.9054	0.0846613	-22.5061	3.618e-112	9.57541e-110
DAAM1	214.774	1.66123	0.074007	22.4469	1.37324e-111	3.56316e-109
MBP	118.095	3.91527	0.174888	22.3873	5.23067e-111	1.3311e-108
KCNN2	51.1012	-2.98278	0.133699	-22.3097	2.97208e-110	7.42067e-108
STARD13	94.0564	-5.1345	0.231364	-22.1923	4.07991e-109	9.99804e-107
JARID2	477.165	-1.09351	0.0494168	-22.1282	1.69137e-108	4.06945e-106
ACKR1	51.9357	-1.67903	0.0767619	-21.8733	4.66647e-106	1.1027e-103
MARCH3	267.617	2.28222	0.105955	21.5395	6.64676e-103	1.5431e-100
MEIS1	147.817	2.59859	0.121004	21.4753	2.64972e-102	6.04548e-100
NFASC	207.783	-1.60009	0.0750643	-21.3163	8.02059e-101	1.79892e-98
DCLK2	164.937	-1.03375	0.0485019	-21.3136	8.4946e-101	1.87348e-98
TMEM192	39.3356	-1.69237	0.0794829	-21.2923	1.33927e-100	2.90535e-98
THSD7A	699.242	-2.00912	0.0945806	-21.2424	3.87582e-100	8.27237e-98
AC006148.1	135.681	-4.0871	0.192654	-21.2147	6.99367e-100	1.469e-97
MEG3	465.096	-4.77442	0.226075	-21.1188	5.3466e-99	1.10549e-96
TCAIM	98.0592	-1.47259	0.0698078	-21.0949	8.85448e-99	1.80263e-96
NEAT1	429.033	2.71246	0.128924	21.0392	2.87305e-98	5.76047e-96
MED13L	492.018	0.803158	0.0381943	21.0282	3.62096e-98	7.15167e-96
PTPN3	55.0609	-4.50578	0.214805	-20.9761	1.08319e-97	2.10792e-95
AP000857.2	142.772	2.01371	0.0960812	20.9584	1.57252e-97	3.01582e-95
RAP1GAP	51.667	-3.5598	0.170439	-20.886	7.1762e-97	1.35661e-94
IL1RAPL1	49.5554	-5.54805	0.26621	-20.8409	1.84305e-96	3.43508e-94
CTNNA3	32.1991	-4.71097	0.227253	-20.7301	1.8534e-95	3.40639e-93
STXBP5L	565.591	-0.839549	0.040586	-20.6857	4.66332e-95	8.45339e-93
CALD1	167.777	-1.68423	0.0819441	-20.5534	7.17952e-94	1.28387e-91
DIXDC1	48.3654	-2.66437	0.130522	-20.4132	1.27768e-92	2.25435e-90
TOX	248.272	4.9795	0.243967	20.4105	1.34812e-92	2.34732e-90
GAREM1	353.021	1.08414	0.053436	20.2885	1.62401e-91	2.79097e-89
LRRTM3	26.6585	-6.09109	0.301931	-20.1738	1.66467e-90	2.82418e-88
RAB3IP	304.801	1.39345	0.0691453	20.1524	2.56269e-90	4.29267e-88
FAM171B	364.477	-1.16076	0.0578893	-20.0513	1.96447e-89	3.24947e-87
LRTM1	273.395	2.10159	0.106622	19.7107	1.746e-86	2.85245e-84
SPATS2	162.751	1.60667	0.0817544	19.6524	5.51035e-86	8.8925e-84
PROX1-AS1	354.716	4.02966	0.20542	19.6166	1.11496e-85	1.77761e-83
EFR3A	821.909	1.41213	0.0725846	19.455	2.64453e-84	4.16609e-82
AP002370.2	127.802	2.01955	0.103908	19.436	3.83049e-84	5.96339e-82
SDHC	77.3748	-1.46426	0.0755604	-19.3787	1.16858e-83	1.79812e-81
OPCML	740.305	-2.28589	0.118035	-19.3662	1.4877e-83	2.26285e-81
DLG1	190.662	-1.3631	0.070646	-19.2948	5.93885e-83	8.93055e-81
PROX1	224.512	3.18388	0.165217	19.2709	9.4312e-83	1.40228e-80
ZNF423	26.9119	-3.16143	0.165653	-19.0847	3.38438e-81	4.97616e-79
CTNND2	491.647	-1.32448	0.0695074	-19.0553	5.9383e-81	8.63533e-79
FGF14	864.767	-1.77576	0.0933047	-19.0319	9.28429e-81	1.33542e-78
NRSN1	98.133	-2.02732	0.106556	-19.0258	1.0438e-80	1.48523e-78
MEG8	85.3556	-4.79183	0.251909	-19.0221	1.11952e-80	1.57603e-78
MARCH4	15.9806	-4.89214	0.257842	-18.9734	2.82755e-80	3.93863e-78
CADPS	3436.89	0.610567	0.0322363	18.9404	5.303e-80	7.30985e-78
ACSL3	141.837	-1.12165	0.0594632	-18.863	2.29855e-79	3.13575e-77
OGFRL1	62.8639	-2.90805	0.154683	-18.8001	7.5397e-79	1.01809e-76
PLXNC1	28.3281	4.12921	0.219865	18.7806	1.08824e-78	1.45461e-76
FRMPD2	141.029	-3.05432	0.162729	-18.7694	1.34487e-78	1.77966e-76
CACNA1B	71.8682	-2.45312	0.130725	-18.7655	1.44599e-78	1.89453e-76
CCDC92	107.082	-1.04502	0.0557626	-18.7405	2.31497e-78	3.00333e-76
MYO10	57.4551	5.01091	0.267667	18.7207	3.35685e-78	4.31274e-76
SLC23A2	890.775	0.812224	0.0435113	18.6669	9.19572e-78	1.17007e-75
MAP7	1458.97	0.611837	0.0328501	18.6251	2.01047e-77	2.53377e-75
CACNA1A	226.377	-3.41249	0.184809	-18.4649	3.95402e-76	4.93618e-74
FAM13B	120.109	-0.932	0.0506537	-18.3994	1.32709e-75	1.64125e-73
FSTL5	2981.36	0.755238	0.0412489	18.3093	6.97964e-75	8.552e-73
AGBL1	105.454	3.95024	0.216011	18.2872	1.04653e-74	1.27052e-72
ZFHX3	350.612	2.6796	0.146562	18.2831	1.12917e-74	1.3584e-72
MAN1A1	174.171	-2.80294	0.153402	-18.2719	1.38566e-74	1.65193e-72
GALNT7	345.398	-0.971964	0.0534804	-18.1742	8.25802e-74	9.757e-72
AC105383.1	13.5217	-5.0146	0.276588	-18.1302	1.84123e-73	2.1562e-71
FLT1	92.5178	-3.56693	0.198376	-17.9806	2.76333e-72	3.20764e-70
PCDH10	31.5264	-4.00781	0.223117	-17.9628	3.80934e-72	4.38339e-70
AC109439.2	30.7501	-7.07659	0.394596	-17.9337	6.43068e-72	7.33597e-70
KIF1B	850.741	0.618828	0.0345111	17.9313	6.71992e-72	7.6004e-70
ASIC2	619.184	-3.54671	0.197832	-17.9279	7.14907e-72	8.01725e-70
SNHG14	1276.13	-0.59868	0.0335225	-17.859	2.45814e-71	2.73349e-69
SCN7A	141.773	4.56198	0.256307	17.7989	7.21043e-71	7.9513e-69
ARL5C	55.4371	-2.37789	0.134894	-17.6278	1.50779e-69	1.64898e-67
HMBOX1	134.456	1.07987	0.0615501	17.5446	6.54037e-69	7.09415e-67
TENM1	91.4619	-2.67185	0.153179	-17.4427	3.91076e-68	4.2074e-66
GRIP2	6.79118	-3.69499	0.21187	-17.4399	4.10661e-68	4.38248e-66
KDM1A	98.7068	-1.05192	0.0605451	-17.3742	1.29367e-67	1.36953e-65
AC079465.1	35.1916	2.90966	0.168398	17.2785	6.82599e-67	7.16892e-65
PCDH9-AS2	211.365	3.2846	0.190576	17.2351	1.4477e-66	1.50846e-64
STARD13-AS	18.2004	-4.85826	0.28298	-17.1682	4.59436e-66	4.74978e-64
ICA1	26.8606	-2.70584	0.158245	-17.0991	1.50764e-65	1.54656e-63
RPS6KA3	187.443	1.03475	0.0605826	17.0801	2.08885e-65	2.12629e-63
MMS22L	38.8342	-2.20952	0.12955	-17.0554	3.18698e-65	3.21934e-63
NCAM1	482.113	-0.934835	0.0549401	-17.0155	6.29956e-65	6.31531e-63
FUT9	15.3977	-5.25637	0.308986	-17.0117	6.7288e-65	6.6949e-63
MARCH1	314.448	-2.9886	0.175767	-17.0032	7.78204e-65	7.68505e-63
CSRNP3	273.327	-1.00919	0.0594204	-16.9838	1.08221e-64	1.0608e-62
ATP2A2	100.196	-0.987029	0.0582558	-16.943	2.16719e-64	2.10871e-62
MAP4K4	245.642	1.08814	0.0642263	16.9422	2.197e-64	2.12211e-62
CSNK1G1	160.006	1.22971	0.0730819	16.8265	1.5601e-63	1.496e-61
ATP2B1	447.849	0.880415	0.0523485	16.8183	1.79089e-63	1.70495e-61
BTRC	235.005	-0.752219	0.0447937	-16.793	2.74832e-63	2.59775e-61
ATRNL1	781.327	1.37367	0.0818482	16.7832	3.24146e-63	3.04214e-61
AC112178.1	74.9246	-5.58813	0.334087	-16.7266	8.39568e-63	7.77928e-61
RELN	68.3802	5.41761	0.323894	16.7265	8.40653e-63	7.77928e-61
LIFR	23.1045	-1.83818	0.11033	-16.6608	2.52727e-62	2.32246e-60
ADAM23	447.495	-1.23275	0.0740299	-16.652	2.92639e-62	2.67068e-60
HECTD1	199.286	-0.846228	0.0508902	-16.6285	4.33272e-62	3.92704e-60
DNM3	278.41	0.869073	0.0524882	16.5575	1.4137e-61	1.27261e-59
GPM6A	438.104	-0.680589	0.0411144	-16.5535	1.50942e-61	1.3496e-59
PLOD2	96.8884	2.28677	0.138464	16.5153	2.84633e-61	2.52789e-59
AC105402.3	29.5815	-2.01968	0.122604	-16.4732	5.72088e-61	5.04696e-59
RASAL2	268.727	1.63389	0.0994479	16.4296	1.1746e-60	1.02937e-58
HIVEP3	173.037	-1.06635	0.0649627	-16.4149	1.49724e-60	1.30329e-58
RYR3	19.7425	-3.68913	0.224748	-16.4145	1.50686e-60	1.30329e-58
EXT1	593.872	1.05635	0.0646115	16.3492	4.40476e-60	3.78495e-58
TCF4-AS1	25.3106	-2.60329	0.159628	-16.3085	8.59244e-60	7.33573e-58
PDZD4	19.3735	-2.06247	0.126787	-16.2672	1.68664e-59	1.43073e-57
MRC2	23.2178	-4.25373	0.262747	-16.1894	5.9889e-59	5.04784e-57
THSD7B	31.3498	-6.35186	0.392614	-16.1784	7.16613e-59	6.00186e-57
STK39	205.749	1.53106	0.0948419	16.1433	1.26545e-58	1.05319e-56
NRXN1	388.879	-2.24579	0.139622	-16.0848	3.26119e-58	2.69721e-56
SNX9	71.2634	2.6074	0.162227	16.0725	3.97492e-58	3.26709e-56
NRIP1	132.099	-1.01612	0.0633987	-16.0275	8.21197e-58	6.70796e-56
UST	19.2483	5.84087	0.365965	15.9602	2.42061e-57	1.96515e-55
WFDC1	174.554	2.72148	0.170908	15.9237	4.34145e-57	3.50307e-55
TMEM178B	415.467	-0.892099	0.0560598	-15.9134	5.11934e-57	4.10571e-55
RALGPS2	346.475	0.891676	0.0560789	15.9004	6.29747e-57	5.02015e-55
PBX1	122.775	-1.43497	0.0902938	-15.8923	7.17041e-57	5.6818e-55
CHPT1	62.6395	-1.14662	0.0723035	-15.8584	1.2295e-56	9.68449e-55
CDH10	36.4381	-5.03723	0.317781	-15.8512	1.37832e-56	1.07925e-54
COMMD1	179.793	1.12634	0.0710756	15.847	1.47351e-56	1.147e-54
SRRM4	573.85	0.733394	0.0463187	15.8336	1.82331e-56	1.41099e-54
PRKAR2B	108.935	1.5221	0.0961952	15.823	2.15903e-56	1.66107e-54
MIR181A1HG	144.192	1.87003	0.118307	15.8065	2.80513e-56	2.14568e-54
SYN3	27.0275	4.65904	0.294966	15.7952	3.35866e-56	2.55432e-54
PKNOX2	27.6792	-3.26217	0.206631	-15.7875	3.79548e-56	2.87003e-54
YBX3	24.0308	-2.86893	0.182081	-15.7563	6.21363e-56	4.67188e-54
MSI2	520.846	0.666291	0.0423752	15.7236	1.04253e-55	7.7942e-54
CCDC148	82.8232	-1.3682	0.0873889	-15.6564	3.0038e-55	2.23311e-53
EPHA10	13.9615	-2.42285	0.155259	-15.6053	6.70361e-55	4.9558e-53
CHST11	79.139	-3.33741	0.214043	-15.5923	8.21594e-55	6.04008e-53
SEZ6	55.5287	-1.4438	0.0937626	-15.3984	1.67725e-53	1.22625e-51
NHS	57.9642	-1.9229	0.125422	-15.3313	4.72112e-53	3.43267e-51
RAB30	30.4324	-1.66612	0.109106	-15.2707	1.198e-52	8.66294e-51
SIPA1L1	174.16	1.24508	0.0817339	15.2333	2.1248e-52	1.52812e-50
ABCC8	66.003	-1.88183	0.123594	-15.2259	2.38008e-52	1.70246e-50
SASH1	132.136	4.52968	0.299366	15.1309	1.01289e-51	7.2062e-50
C3orf70	158.609	-2.80037	0.185772	-15.0742	2.39421e-51	1.69425e-49
RNF112	4.20438	-3.87502	0.25711	-15.0714	2.49679e-51	1.75745e-49
HDAC9	949.003	-0.719409	0.047772	-15.0592	3.00258e-51	2.10228e-49
PELI1	12.651	-2.71482	0.180447	-15.045	3.72583e-51	2.59494e-49
ANKRD13A	67.2271	1.42104	0.0944552	15.0446	3.74665e-51	2.59578e-49
NT5C2	140.418	0.989014	0.0658278	15.0243	5.09213e-51	3.50959e-49
ADD2	71.4171	-1.29969	0.0869003	-14.9561	1.42198e-50	9.74975e-49
STK38	51.1261	-1.34096	0.0898403	-14.926	2.23157e-50	1.52218e-48
ITM2B	409.9	-0.795088	0.0533231	-14.9108	2.80567e-50	1.90397e-48
LRP1B	736.044	3.85081	0.258582	14.8921	3.71189e-50	2.50609e-48
KCNJ6	26.5455	-2.68256	0.180621	-14.8519	6.76296e-50	4.54286e-48
BCAT1	371.864	1.85761	0.125137	14.8446	7.54026e-50	5.03941e-48
LHFPL2	21.0983	3.32389	0.224024	14.8372	8.41976e-50	5.59893e-48
FBXO34	99.7616	1.30323	0.0879696	14.8146	1.17959e-49	7.80473e-48
LINC01798	63.5448	4.87404	0.329025	14.8136	1.19675e-49	7.87893e-48
RRAS2	30.9271	-1.90006	0.128402	-14.7978	1.5143e-49	9.92018e-48
NIN	21.9446	-2.3929	0.161772	-14.7918	1.65547e-49	1.07915e-47
LHFPL3	388.795	-2.47629	0.16745	-14.7882	1.74443e-49	1.13157e-47
CLTB	113.236	-1.13755	0.0769767	-14.7778	2.03648e-49	1.31457e-47
GRIA1	334.167	-2.00773	0.13594	-14.7693	2.31138e-49	1.48478e-47
PAG1	102.931	2.17996	0.148254	14.7043	6.05327e-49	3.8697e-47
SH3D19	167.149	-1.27023	0.0864412	-14.6947	6.96647e-49	4.43208e-47
AC104365.1	37.7653	-1.75754	0.119617	-14.693	7.14271e-49	4.52246e-47
SMPD3	85.3964	-1.63701	0.111676	-14.6585	1.18845e-48	7.48894e-47
NDFIP2	44.9101	2.22449	0.151832	14.6511	1.32643e-48	8.31876e-47
PITPNM2	113.044	1.69916	0.116031	14.644	1.47187e-48	9.18736e-47
MAPK6	118.755	1.18209	0.0809597	14.6009	2.77103e-48	1.72155e-46
DENND4C	195.112	-0.724202	0.0496188	-14.5953	3.00723e-48	1.85956e-46
ZNF91	154.487	-0.740407	0.0507737	-14.5825	3.63044e-48	2.23449e-46
COL25A1	18.249	-4.02975	0.276722	-14.5625	4.86694e-48	2.98168e-46
SHROOM3	114.339	-1.01231	0.0700037	-14.4608	2.14352e-47	1.30715e-45
AC124854.1	37.3763	5.19657	0.362129	14.35	1.0647e-46	6.4629e-45
USP3	151.061	1.13709	0.0793649	14.3273	1.47693e-46	8.92429e-45
PRKCE	381.36	1.24043	0.0867192	14.304	2.06669e-46	1.24311e-44
RFTN1	26.2728	2.00598	0.140399	14.2877	2.61087e-46	1.56333e-44
AL024508.1	12.1538	3.07024	0.215477	14.2486	4.57672e-46	2.7281e-44
ASTN1	119.075	-1.87411	0.131645	-14.2361	5.46565e-46	3.24336e-44
CPEB4	370.746	0.720726	0.0507983	14.188	1.08722e-45	6.42283e-44
SLC22A15	17.9315	-4.47123	0.315999	-14.1495	1.88068e-45	1.10609e-43
NCOA7	76.6087	1.11552	0.0788909	14.14	2.152e-45	1.26006e-43
CIT	30.0012	-2.45372	0.174551	-14.0573	6.94607e-45	4.04922e-43
CCDC134	14.498	-1.61758	0.1153	-14.0293	1.03114e-44	5.98466e-43
HLTF	195.357	0.949494	0.0677106	14.0228	1.13025e-44	6.53125e-43
AC113383.1	93.2821	2.04977	0.146236	14.0169	1.22835e-44	7.06727e-43
PDZRN3	90.8715	-2.44277	0.174463	-14.0017	1.52273e-44	8.72304e-43
RAVER2	58.1713	-1.53354	0.109766	-13.971	2.34299e-44	1.33642e-42
FRMPD4	105.965	-3.47849	0.249833	-13.9232	4.57614e-44	2.59897e-42
PLXDC1	475.869	0.797744	0.0573451	13.9113	5.4097e-44	3.05925e-42
AC010551.3	80.5366	2.92574	0.21078	13.8805	8.31594e-44	4.68276e-42
KCTD6	23.943	-1.81433	0.130751	-13.8762	8.83007e-44	4.9512e-42
SYNDIG1	43.5336	-4.2551	0.306701	-13.8738	9.13205e-44	5.09892e-42
ETV1	9.61388	-4.63891	0.334551	-13.8661	1.01677e-43	5.65334e-42
GNB5	357.577	0.774517	0.0560149	13.827	1.75201e-43	9.70057e-42
CSGALNACT2	55.7812	-0.995186	0.0720558	-13.8113	2.1777e-43	1.20073e-41
PHACTR1	360.28	-1.32505	0.0961392	-13.7826	3.2424e-43	1.78036e-41
MIB1	126.228	-0.829501	0.0605444	-13.7007	1.00553e-42	5.49841e-41
LRRC49	332.691	0.735294	0.0536944	13.6941	1.10189e-42	6.00054e-41
AJAP1	39.6397	-3.86156	0.282468	-13.6708	1.51711e-42	8.22784e-41
RYR1	29.2332	-2.32231	0.169906	-13.6682	1.57184e-42	8.48985e-41
VWA8	395.74	0.592219	0.0433534	13.6603	1.75293e-42	9.42949e-41
SGMS1	448.395	0.895057	0.0655418	13.6563	1.85187e-42	9.92139e-41
ASTN2	148.085	-1.74856	0.128261	-13.6328	2.55547e-42	1.36357e-40
CACNA2D1	789.865	1.84776	0.135725	13.614	3.30764e-42	1.75783e-40
BTBD9	348.059	0.937662	0.0689656	13.5961	4.2253e-42	2.23653e-40
CUX2	51.0602	-3.55014	0.261292	-13.5869	4.79133e-42	2.52604e-40
C1orf21	82.3772	-1.42625	0.104991	-13.5845	4.94943e-42	2.59904e-40
PLPPR4	42.1574	-2.12527	0.156645	-13.5674	6.24879e-42	3.26839e-40
FMNL3	19.7134	-2.10323	0.155326	-13.5407	8.98763e-42	4.68241e-40
ACTN1	94.1707	1.53923	0.113875	13.5168	1.2441e-41	6.45616e-40
AC087855.1	44.6473	2.27529	0.168416	13.51	1.36577e-41	7.05985e-40
KLHL3	49.1778	-1.18844	0.0880149	-13.5027	1.50746e-41	7.76194e-40
UNC5D	747.248	2.05966	0.152578	13.499	1.5844e-41	8.12648e-40
FRRS1L	95.0691	-1.02357	0.0758382	-13.4968	1.633e-41	8.34341e-40
KIF13A	329.963	-0.582084	0.0431961	-13.4754	2.18321e-41	1.11117e-39
PGAP1	122.796	0.991505	0.0736003	13.4715	2.30192e-41	1.1671e-39
KCNMA1	1686.98	0.522795	0.0388416	13.4597	2.70143e-41	1.36443e-39
TRIM2	205.316	-1.01398	0.0755183	-13.427	4.20183e-41	2.11417e-39
GPC3	27.9648	-2.98255	0.222171	-13.4246	4.34029e-41	2.17557e-39
NME7	96.8229	-0.896036	0.06682	-13.4097	5.30568e-41	2.64944e-39
NWD2	13.8883	-6.69258	0.499303	-13.4039	5.74004e-41	2.85556e-39
VOPP1	112.599	-1.03426	0.0772828	-13.3828	7.62346e-41	3.77832e-39
SVIL	137.441	-1.25208	0.0936189	-13.3742	8.55921e-41	4.22627e-39
PKP4-AS1	14.2504	-1.97639	0.147785	-13.3734	8.64663e-41	4.25357e-39
AC006460.2	99.6852	1.24279	0.0929428	13.3715	8.86951e-41	4.34705e-39
SLC13A3	16.4707	-1.87267	0.14013	-13.3638	9.84551e-41	4.80759e-39
MYO9B	42.1206	-1.20234	0.0902412	-13.3237	1.68628e-40	8.2039e-39
AC107021.1	43.0499	2.37707	0.178644	13.3062	2.1315e-40	1.03319e-38
CAMK4	497.169	-0.975584	0.0733577	-13.299	2.34604e-40	1.13304e-38
RNF144A	45.4357	-1.58301	0.119623	-13.2333	5.63758e-40	2.7128e-38
TRPS1	34.4305	3.18876	0.241	13.2314	5.78288e-40	2.77264e-38
NTM	672.47	-1.67832	0.127305	-13.1835	1.09265e-39	5.21985e-38
LANCL2	60.4547	-1.02401	0.0777313	-13.1737	1.24386e-39	5.92084e-38
TMEM132D	66.257	4.59699	0.350125	13.1296	2.22903e-39	1.05723e-37
PAK3	309.116	1.0193	0.0776665	13.1241	2.39544e-39	1.1321e-37
CLSTN2	13.1925	-3.0147	0.230253	-13.093	3.61027e-39	1.70017e-37
NIPSNAP3B	40.3612	-1.88375	0.143959	-13.0853	3.99798e-39	1.87607e-37
NEBL	1224.67	2.0951	0.160159	13.0814	4.20655e-39	1.96697e-37
CES4A	12.0471	-2.83552	0.216813	-13.0782	4.38814e-39	2.04466e-37
PPM1L	554.08	0.927835	0.0709826	13.0713	4.80343e-39	2.23031e-37
GRIN2D	10.1569	-2.74725	0.210308	-13.063	5.3573e-39	2.47878e-37
AMOTL1	9.2961	-4.01173	0.307205	-13.0588	5.6595e-39	2.60949e-37
RANBP17	308.034	-0.602157	0.0461136	-13.0581	5.71146e-39	2.6243e-37
PDGFC	54.7348	-2.58244	0.197877	-13.0507	6.29589e-39	2.88282e-37
SSBP3	193.738	1.00567	0.0772354	13.0209	9.30882e-39	4.24771e-37
TJP1	275.811	-1.12839	0.0867236	-13.0113	1.05509e-38	4.79795e-37
KLHL8	43.7771	-1.37908	0.106367	-12.9654	1.92239e-38	8.71198e-37
CECR2	90.0703	-2.64899	0.204629	-12.9453	2.49804e-38	1.12821e-36
NTRK2	87.0639	-1.65231	0.127867	-12.9221	3.37619e-38	1.51963e-36
NEK2	5.15212	-3.50092	0.271157	-12.9111	3.89937e-38	1.74917e-36
ATP11A	221.937	-0.769129	0.0597282	-12.8771	6.05342e-38	2.70625e-36
AC091885.2	15.9844	-6.09743	0.473888	-12.8668	6.91945e-38	3.083e-36
PLEKHA5	607.556	0.786533	0.0611676	12.8587	7.68999e-38	3.41482e-36
SERTAD2	128.884	1.03724	0.0807282	12.8485	8.76929e-38	3.88107e-36
SLC12A2	302.845	-0.772988	0.0601689	-12.847	8.94394e-38	3.94517e-36
AGTPBP1	253.937	0.824005	0.0641785	12.8393	9.88095e-38	4.34401e-36
ENOX1	214.28	1.78825	0.139284	12.8389	9.92966e-38	4.35097e-36
TNRC18	167.866	-0.637717	0.0498968	-12.7807	2.10147e-37	9.17781e-36
MYT1L	158.595	-2.20065	0.172584	-12.7512	3.07132e-37	1.33693e-35
ZNF385D	178.069	3.08204	0.242345	12.7175	4.72469e-37	2.04989e-35
AC006387.1	51.5984	1.67262	0.131694	12.7008	5.85384e-37	2.5315e-35
PIP5K1B	33.1866	-2.33827	0.184468	-12.6757	8.06204e-37	3.47508e-35
EIF4G3	524.11	0.536591	0.0423475	12.6711	8.54805e-37	3.67261e-35
PROM1	21.0206	-4.42014	0.348995	-12.6653	9.20521e-37	3.94215e-35
EML4	142.805	1.07091	0.0845859	12.6606	9.76953e-37	4.17033e-35
IFNLR1	7.43467	-2.53281	0.200685	-12.6208	1.62109e-36	6.8977e-35
THRB	180.919	1.03172	0.0817954	12.6134	1.78181e-36	7.55725e-35
TMEM196	291.017	-2.56543	0.203481	-12.6077	1.91523e-36	8.09718e-35
NEXMIF	69.2291	-1.17739	0.0935443	-12.5864	2.50789e-36	1.05691e-34
SYNDIG1L	6.69539	-2.93535	0.233556	-12.5681	3.16372e-36	1.32906e-34
HPGD	21.3816	4.05605	0.322767	12.5665	3.22798e-36	1.35177e-34
RAP1GDS1	316.108	0.586757	0.0467513	12.5506	3.94517e-36	1.64689e-34
LYST	313.311	0.570706	0.045507	12.5411	4.4492e-36	1.85145e-34
DEPTOR	36.4886	-2.02225	0.161312	-12.5363	4.72712e-36	1.96094e-34
APPL2	177.667	-0.634798	0.0506555	-12.5317	5.00868e-36	2.07124e-34
KCNH7	670.531	3.42523	0.273547	12.5215	5.69301e-36	2.3469e-34
NCDN	20.5914	-1.6754	0.134474	-12.4589	1.25051e-35	5.13914e-34
MBNL3	6.19001	-2.22513	0.178735	-12.4493	1.41021e-35	5.7775e-34
SOX4	27.1047	-2.11806	0.170408	-12.4294	1.81069e-35	7.39531e-34
SLC1A2	253.115	-1.07252	0.0864074	-12.4123	2.24109e-35	9.12503e-34
KSR2	158.893	-0.673095	0.0543255	-12.39	2.95909e-35	1.20116e-33
GRIA4	277.658	-1.85542	0.150065	-12.3641	4.08806e-35	1.65435e-33
CLTC	128.998	-0.687216	0.0556056	-12.3588	4.36888e-35	1.7626e-33
MAP4	514.446	0.518919	0.0420804	12.3316	6.12039e-35	2.46174e-33
LINC02018	19.0378	3.40653	0.276521	12.3192	7.13666e-35	2.8618e-33
DNAH17	259.91	0.940894	0.0765615	12.2894	1.03283e-34	4.12914e-33
SND1	140.079	-0.76397	0.062237	-12.2752	1.23138e-34	4.90809e-33
ZEB1	373.263	0.7811	0.0636792	12.2662	1.37601e-34	5.46808e-33
MCUB	143.578	1.4057	0.114781	12.2468	1.74717e-34	6.92225e-33
KCNG4	74.6085	2.00836	0.164171	12.2334	2.06188e-34	8.14473e-33
AC019068.1	4.278	-4.40501	0.360194	-12.2296	2.16087e-34	8.51035e-33
KLF12	171.348	-0.883079	0.0722221	-12.2273	2.22274e-34	8.72803e-33
SBSPON	19.3619	3.11973	0.256052	12.184	3.78458e-34	1.4817e-32
APLP2	427.554	0.71964	0.059387	12.1178	8.5009e-34	3.31836e-32
TBX2-AS1	16.6633	-2.22608	0.183716	-12.1169	8.58997e-34	3.34327e-32
AL596451.1	18.8231	-3.70186	0.305633	-12.1121	9.1148e-34	3.53713e-32
AC011824.2	35.9807	-4.71043	0.389228	-12.102	1.03083e-33	3.9886e-32
SIMC1	103.418	-0.736822	0.061097	-12.0599	1.72063e-33	6.63824e-32
NCKAP5	682.33	1.65891	0.138111	12.0114	3.09431e-33	1.19032e-31
CYTH1	190.932	0.759049	0.0632752	11.996	3.72909e-33	1.43035e-31
FAT3	26.1353	3.8432	0.320914	11.9758	4.76012e-33	1.82054e-31
PDE4B	1419.46	2.10137	0.175612	11.9659	5.35909e-33	2.04371e-31
ELMO1	112.138	2.19669	0.183695	11.9583	5.873e-33	2.23326e-31
ANTXR1	7.80241	-2.75855	0.230956	-11.9441	6.97397e-33	2.64431e-31
TAX1BP1	350.201	0.757209	0.0634189	11.9398	7.33884e-33	2.77471e-31
LNPK	102.445	0.823243	0.0689544	11.9389	7.41624e-33	2.79599e-31
LDB2	203.759	-1.30173	0.109338	-11.9055	1.10775e-32	4.16443e-31
PDE3A	285.769	3.05214	0.257546	11.8508	2.13046e-32	7.9865e-31
CPD	186.683	0.958733	0.0809558	11.8427	2.34849e-32	8.77899e-31
FRY	492.661	0.819994	0.0692964	11.8331	2.63117e-32	9.80796e-31
TCF4-AS2	6.72355	-3.34199	0.282681	-11.8225	2.98769e-32	1.11056e-30
SULT1C4	22.6752	-3.05477	0.25845	-11.8196	3.09145e-32	1.14591e-30
STXBP5-AS1	109.905	2.28385	0.193552	11.7997	3.9185e-32	1.44842e-30
PDE7B	19.7594	-2.7484	0.233522	-11.7693	5.61804e-32	2.07085e-30
UNC13C	1013.26	1.0556	0.0899577	11.7344	8.49494e-32	3.1226e-30
ROBO1	439.022	2.11618	0.180505	11.7236	9.64533e-32	3.53564e-30
DDX6	109.559	-0.780819	0.0667954	-11.6897	1.43885e-31	5.25975e-30
MYCBP2	369.335	-0.467621	0.040249	-11.6182	3.33105e-31	1.21432e-29
GLS	238.248	0.654704	0.0563862	11.6111	3.62091e-31	1.31636e-29
HECW2	169.917	1.22742	0.10588	11.5926	4.49385e-31	1.62923e-29
GRM6	555.512	-1.21625	0.105038	-11.5792	5.25421e-31	1.8997e-29
ZNF804B	1531.43	2.76002	0.238921	11.552	7.2106e-31	2.59994e-29
OSBPL10	95.0982	1.90746	0.165169	11.5486	7.5059e-31	2.69906e-29
RIMS3	8.10357	-2.31538	0.200648	-11.5395	8.33696e-31	2.98978e-29
PCED1B	40.6643	-3.09292	0.268195	-11.5323	9.06469e-31	3.24197e-29
PRELID2	572.699	2.93105	0.254771	11.5046	1.24996e-30	4.4584e-29
MTUS1	231.479	0.917257	0.0798009	11.4943	1.40874e-30	5.01126e-29
AC080038.1	4.56417	-4.30982	0.374999	-11.4929	1.43276e-30	5.08302e-29
ABLIM1	172.758	-1.79116	0.15629	-11.4605	2.08301e-30	7.37019e-29
ERO1B	51.5692	-0.875971	0.0764392	-11.4597	2.10204e-30	7.41766e-29
CORO2B	172.257	0.941847	0.0821958	11.4586	2.12985e-30	7.49584e-29
AC105285.1	107.848	-0.956406	0.0837123	-11.4249	3.1399e-30	1.10213e-28
TACC2	61.3479	-0.871086	0.0762856	-11.4187	3.37059e-30	1.17997e-28
BICDL1	157.258	0.708126	0.0620203	11.4176	3.41344e-30	1.19182e-28
ZNRF2	84.1164	1.02287	0.0896253	11.4127	3.61249e-30	1.258e-28
USP3-AS1	89.6326	1.09684	0.0961247	11.4106	3.70138e-30	1.28557e-28
ZFPM2	55.3825	-3.46518	0.304174	-11.3921	4.57754e-30	1.58572e-28
PCP4L1	56.6632	-1.90631	0.167379	-11.3892	4.73409e-30	1.63567e-28
MDGA1	68.025	2.57627	0.226227	11.388	4.79999e-30	1.65412e-28
ATP9A	116.149	-0.638821	0.0561271	-11.3817	5.15898e-30	1.77322e-28
WWTR1	32.4762	1.43448	0.126102	11.3756	5.53464e-30	1.8974e-28
MIR193BHG	12.2264	-3.3663	0.296233	-11.3637	6.34115e-30	2.16828e-28
CNPY3	30.0773	-1.15723	0.102154	-11.3283	9.50584e-30	3.24203e-28
RFLNA	45.9314	-1.06008	0.0937684	-11.3053	1.23525e-29	4.20208e-28
CPE	483.418	-0.552792	0.0489823	-11.2856	1.54665e-29	5.24792e-28
APBA1	137.03	-0.764576	0.0678778	-11.264	1.97596e-29	6.67441e-28
ZNF98	12.4161	-1.96422	0.174381	-11.2639	1.97715e-29	6.67441e-28
ARL6	67.7701	1.15022	0.102193	11.2554	2.1779e-29	7.33336e-28
AC010997.3	18.1576	-2.86265	0.254445	-11.2506	2.30073e-29	7.72729e-28
RGS17	46.3848	-1.22884	0.109381	-11.2345	2.75988e-29	9.24595e-28
NEUROD4	133.958	-1.32106	0.117605	-11.233	2.80882e-29	9.38613e-28
SLCO3A1	153.799	-1.30052	0.115914	-11.2198	3.26173e-29	1.08722e-27
SPOCK1	38.8302	-2.15836	0.192432	-11.2162	3.39507e-29	1.12882e-27
AUTS2	1460.3	-0.461482	0.0412279	-11.1934	4.39072e-29	1.4562e-27
POMGNT2	13.6919	-1.67495	0.150161	-11.1544	6.81704e-29	2.25525e-27
ITGAV	312.271	-0.609473	0.0546771	-11.1468	7.42511e-29	2.45029e-27
DENND4A	412.362	0.51297	0.0460978	11.1279	9.18077e-29	3.02212e-27
MEST	21.4115	-1.55414	0.139695	-11.1253	9.44833e-29	3.10248e-27
CPEB3	346.336	-0.496757	0.0446847	-11.1169	1.03781e-28	3.39933e-27
KIAA0319L	186.511	-0.571376	0.0514275	-11.1103	1.11741e-28	3.65105e-27
PITPNC1	97.9928	-1.69877	0.153002	-11.1029	1.21389e-28	3.95649e-27
TJP2	475.149	0.919804	0.082949	11.0888	1.42203e-28	4.62352e-27
TEAD1	156.476	1.11662	0.100959	11.0601	1.95926e-28	6.35464e-27
TMEM229B	22.1133	-2.33176	0.211038	-11.049	2.21629e-28	7.1707e-27
GNAL	49.4014	1.82558	0.165265	11.0464	2.28088e-28	7.36168e-27
PMEPA1	44.8698	1.51255	0.136966	11.0432	2.36356e-28	7.60998e-27
CADM3-AS1	12.4727	-1.52476	0.138117	-11.0396	2.46059e-28	7.90316e-27
SCN2A	210.744	-0.589516	0.0534456	-11.0302	2.73235e-28	8.75476e-27
CDK8	213.468	0.694343	0.0629787	11.0251	2.89358e-28	9.24896e-27
ANXA6	21.6955	-1.85751	0.168697	-11.011	3.3832e-28	1.07879e-26
KAZN	252.007	-2.31211	0.210368	-10.9908	4.23253e-28	1.34637e-26
MFAP3L	30.7968	2.08548	0.190002	10.976	4.98239e-28	1.5811e-26
PPP2R2D	93.9068	-0.737376	0.067271	-10.9613	5.86746e-28	1.85751e-26
KCTD1	41.0532	-1.2102	0.110445	-10.9574	6.12009e-28	1.93287e-26
DISC1	311.001	-2.53366	0.231252	-10.9563	6.19946e-28	1.95327e-26
AC004160.1	82.0256	-1.82871	0.167133	-10.9417	7.28439e-28	2.28965e-26
LINC00472	16.1801	-2.20723	0.201786	-10.9384	7.55015e-28	2.36756e-26
SLC16A10	45.2663	-1.36354	0.124669	-10.9373	7.64402e-28	2.39133e-26
SYNE1	978.23	0.626507	0.0573475	10.9247	8.77867e-28	2.73981e-26
TNRC6A	517.267	-0.449243	0.0411353	-10.9211	9.13711e-28	2.84497e-26
ARHGAP10	19.3272	-3.76791	0.345609	-10.9023	1.12436e-27	3.49263e-26
ROBO2	2831.6	2.21505	0.20354	10.8827	1.39428e-27	4.32098e-26
AC114316.1	14.8838	3.72658	0.342567	10.8784	1.46091e-27	4.51687e-26
EPB41	827.999	-0.487533	0.0449415	-10.8482	2.03491e-27	6.27691e-26
SHF	42.2159	-0.943718	0.0871728	-10.8258	2.59724e-27	7.99286e-26
COL6A1	10.986	-3.15758	0.291885	-10.8179	2.83248e-27	8.69657e-26
CSMD2	117.835	1.14736	0.106138	10.8101	3.08414e-27	9.44733e-26
LRFN5	180.203	3.37056	0.312351	10.7909	3.79848e-27	1.16086e-25
GPC5	48.2315	2.58245	0.239401	10.7871	3.96077e-27	1.20767e-25
COCH	5.41192	-1.9531	0.181202	-10.7786	4.34602e-27	1.32209e-25
ZNF503-AS1	11.9427	-3.07459	0.28573	-10.7605	5.28899e-27	1.60526e-25
CLASP1	445.152	0.40215	0.0374087	10.7502	5.91438e-27	1.79096e-25
HOOK1	183.811	0.651588	0.060771	10.722	8.02231e-27	2.42373e-25
AC097460.1	29.5171	-1.35088	0.126149	-10.7086	9.27257e-27	2.79508e-25
L1CAM	16.3198	-1.79543	0.167666	-10.7084	9.29883e-27	2.79662e-25
ADGRB3	1297.43	0.771487	0.0721298	10.6958	1.06476e-26	3.195e-25
PTCH2	7.51873	-1.61032	0.150784	-10.6796	1.26812e-26	3.79662e-25
ST8SIA1	67.3393	-1.57672	0.14767	-10.6773	1.2993e-26	3.88117e-25
NIPAL2	186.685	1.76855	0.165696	10.6734	1.35517e-26	4.03896e-25
FHL1	34.2867	-0.941302	0.0882234	-10.6695	1.41348e-26	4.20326e-25
KAT6B	218.116	0.572516	0.0536674	10.6679	1.43894e-26	4.26939e-25
ACACA	180.204	-0.563689	0.0528409	-10.6677	1.44221e-26	4.26954e-25
AC024610.2	17.0955	-3.43704	0.322404	-10.6607	1.55501e-26	4.59319e-25
ATR	150.456	0.740234	0.0696936	10.6213	2.37338e-26	6.99485e-25
GSK3B	311.011	-0.445046	0.0419793	-10.6016	2.93052e-26	8.6177e-25
ARAP3	16.2027	-2.18089	0.20605	-10.5843	3.52444e-26	1.03412e-24
UBE2Q2	43.0011	-1.54688	0.146673	-10.5464	5.27765e-26	1.54511e-24
NID1	18.7577	2.616	0.248107	10.5439	5.42212e-26	1.58391e-24
MIR7-3HG	15.1736	-2.05986	0.195369	-10.5434	5.44801e-26	1.58796e-24
AIM2	12.5202	-2.25269	0.214114	-10.521	6.91549e-26	2.01127e-24
SPCS3	36.9366	-0.926724	0.0882268	-10.5039	8.28968e-26	2.40564e-24
SQLE	26.5217	-1.35268	0.128843	-10.4987	8.75723e-26	2.53576e-24
NECAB1	7.92987	-3.464	0.329985	-10.4975	8.87254e-26	2.56354e-24
DPYSL5	28.3879	-2.70259	0.257778	-10.4842	1.0216e-25	2.94527e-24
MAN1C1	59.2657	-0.907118	0.0865463	-10.4813	1.05281e-25	3.02866e-24
DPY19L2	102.938	2.39802	0.229135	10.4655	1.24383e-25	3.57042e-24
MRVI1	5.40264	-2.83145	0.270619	-10.4629	1.27907e-25	3.66363e-24
GSTCD	150.385	0.699697	0.0669563	10.45	1.46456e-25	4.18587e-24
ME3	174.933	0.739543	0.0708217	10.4423	1.58868e-25	4.53081e-24
PXN	23.62	-1.45774	0.139666	-10.4373	1.67452e-25	4.76537e-24
PHC2	156.207	-0.686616	0.065794	-10.4358	1.70095e-25	4.83017e-24
FAM13A	57.5578	2.09445	0.200777	10.4317	1.7766e-25	5.03421e-24
PPP2R3A	39.5763	-0.919688	0.0881993	-10.4274	1.85949e-25	5.25784e-24
ZNF208	28.4803	-1.81625	0.17427	-10.422	1.96713e-25	5.55032e-24
PLCL1	127.698	1.5821	0.151821	10.4208	1.99239e-25	5.60964e-24
HCN1	621.291	2.1624	0.207588	10.4168	2.0787e-25	5.84021e-24
FSTL4	221.784	-1.35754	0.130377	-10.4124	2.17663e-25	6.10242e-24
ANKRD36	264.926	-0.445991	0.0428579	-10.4063	2.32155e-25	6.49495e-24
CDH11	217.021	1.97419	0.189874	10.3974	2.54793e-25	7.11323e-24
PLXDC2	677.984	-1.53244	0.147578	-10.3839	2.93491e-25	8.17634e-24
PKIB	18.6819	2.37747	0.228994	10.3822	2.98689e-25	8.30369e-24
SLC6A15	53.2654	1.1623	0.112027	10.3751	3.21862e-25	8.92914e-24
C11orf80	107.124	0.878554	0.0847362	10.3681	3.46308e-25	9.58724e-24
ARHGEF2	49.3017	1.16813	0.112686	10.3662	3.53176e-25	9.75695e-24
AFF1	321.351	-0.684993	0.0661207	-10.3597	3.78038e-25	1.0422e-23
ANKDD1A	20.9671	1.68311	0.162587	10.352	4.09671e-25	1.12706e-23
RIMS1	808.276	-1.00101	0.0968091	-10.34	4.643e-25	1.27471e-23
DST	2007.14	-0.369393	0.0357254	-10.3398	4.65635e-25	1.27572e-23
C5orf30	24.1573	-1.90483	0.184477	-10.3256	5.39914e-25	1.47617e-23
NELL2	119.878	1.9644	0.190462	10.3139	6.0981e-25	1.66384e-23
LNPEP	105.755	-0.614208	0.0595534	-10.3136	6.11883e-25	1.66606e-23
CDH13	8.39684	-1.99913	0.193972	-10.3063	6.59888e-25	1.79308e-23
PWRN1	13.1553	-2.05381	0.199503	-10.2946	7.45118e-25	2.02052e-23
TMEM200C	8.71283	-2.93753	0.285509	-10.2887	7.92066e-25	2.14344e-23
CALM1	340.343	-0.842276	0.0818704	-10.2879	7.98874e-25	2.15745e-23
MAST3	5.17713	-2.74513	0.266896	-10.2854	8.20237e-25	2.21063e-23
ASIC1	7.54565	-1.51943	0.14796	-10.2691	9.70673e-25	2.61075e-23
FGF12-AS1	75.7033	-1.33281	0.130006	-10.252	1.1597e-24	3.11283e-23
SV2B	467.56	0.476799	0.0465815	10.2358	1.37052e-24	3.67128e-23
OLFM3	213.093	2.23597	0.218492	10.2336	1.40139e-24	3.74639e-23
ABAT	44.7382	-0.928904	0.0908383	-10.2259	1.51797e-24	4.04987e-23
PARD6B	41.9572	1.1325	0.11077	10.2239	1.5505e-24	4.12833e-23
AGAP1-IT1	6.62047	-2.90935	0.284752	-10.2171	1.66157e-24	4.41516e-23
DUOX1	82.2091	-0.80352	0.0787229	-10.2069	1.84596e-24	4.89531e-23
PHTF1	63.7655	-0.817562	0.0802629	-10.186	2.28887e-24	6.05773e-23
SLC7A11	85.659	-2.09085	0.205859	-10.1567	3.0931e-24	8.16986e-23
PLEKHD1	97.4004	1.38841	0.137084	10.1282	4.14324e-24	1.09218e-22
ADAMTS2	15.7729	2.31983	0.229095	10.1261	4.23319e-24	1.11367e-22
ASB18	2.76388	-3.82278	0.377531	-10.1257	4.24744e-24	1.11521e-22
KCNB2	570.768	-2.31771	0.228914	-10.1248	4.29008e-24	1.12417e-22
LINC01584	8.75276	3.55954	0.3519	10.1152	4.73047e-24	1.23712e-22
PTPRS	120.692	-0.886214	0.0876582	-10.1099	4.99431e-24	1.30354e-22
ZFAND3	517.659	0.39106	0.03877	10.0867	6.32826e-24	1.64846e-22
AC007563.2	23.3268	3.80881	0.377825	10.0809	6.71091e-24	1.7447e-22
FAM155A	1478.54	2.56228	0.254868	10.0534	8.8767e-24	2.30324e-22
AC104123.1	4.19439	-3.00907	0.299688	-10.0407	1.00994e-23	2.61537e-22
GRK5	20.596	-1.40554	0.140106	-10.0319	1.10322e-23	2.85136e-22
FOXN3	769.708	0.444846	0.0444899	9.99882	1.54231e-23	3.97845e-22
AL031428.1	63.6328	-0.796184	0.0796737	-9.99306	1.63462e-23	4.20835e-22
TRIM9	115.775	1.12661	0.112743	9.99278	1.63925e-23	4.21208e-22
GRIN1	8.08488	-1.96342	0.196556	-9.9891	1.70123e-23	4.36287e-22
MARCH11	41.6074	-2.75443	0.275946	-9.98176	1.83193e-23	4.68897e-22
RHOT1	163.2	-0.481982	0.0483318	-9.97235	2.01405e-23	5.14517e-22
PCOLCE2	46.0553	2.89328	0.290194	9.97014	2.05938e-23	5.25083e-22
DSCAML1	865.468	0.847724	0.0850293	9.96979	2.0667e-23	5.25935e-22
HHIP	117.48	-1.49158	0.149745	-9.96075	2.2635e-23	5.74912e-22
RERE	1186.86	-0.32119	0.032262	-9.95567	2.38204e-23	6.0386e-22
ARHGAP26	63.8481	-1.37208	0.137956	-9.94578	2.63094e-23	6.65683e-22
NR2F2-AS1	32.0333	-3.86451	0.38863	-9.94394	2.68001e-23	6.76805e-22
KCNAB1	29.8774	1.98876	0.200529	9.91756	3.49175e-23	8.8012e-22
LYN	23.06	-2.78241	0.280598	-9.91599	3.54728e-23	8.92418e-22
AP001831.1	124.338	0.830475	0.0837632	9.91455	3.5986e-23	9.0361e-22
ARHGAP24	7.89615	3.08282	0.311506	9.89649	4.31131e-23	1.08052e-21
SLIT2	434.379	2.74863	0.277783	9.89489	4.38095e-23	1.0959e-21
SLC1A7	251.004	-0.920599	0.0930605	-9.89248	4.48791e-23	1.12054e-21
LY6H	4.95446	-2.22908	0.225365	-9.89094	4.5573e-23	1.13572e-21
CHRM2	18.4859	-3.41532	0.345523	-9.88449	4.86035e-23	1.20897e-21
CARMIL1	284.632	0.98029	0.0993449	9.86755	5.75555e-23	1.42895e-21
NDST3	305.551	0.885855	0.0898534	9.8589	6.27331e-23	1.55458e-21
PDE1C	354.856	1.89943	0.192696	9.85714	6.38445e-23	1.57917e-21
SNRPN	85.8617	-0.850622	0.0863025	-9.85628	6.43928e-23	1.58976e-21
LYRM4	45.5075	1.16659	0.118382	9.85447	6.55614e-23	1.61559e-21
RAB27B	12.1009	-3.13436	0.318203	-9.85019	6.84119e-23	1.6827e-21
SGSM1	8.49848	-1.6855	0.171139	-9.84872	6.94252e-23	1.70446e-21
CRHR1	34.3416	3.18976	0.324259	9.83708	7.79363e-23	1.90987e-21
STXBP1	210.087	-0.532026	0.0541064	-9.83295	8.12017e-23	1.98621e-21
SREBF2	173.667	-0.764359	0.0777626	-9.82939	8.41266e-23	2.05396e-21
PRSS48	11.4146	-1.93819	0.197192	-9.82894	8.45046e-23	2.05939e-21
GP1BB	29.9102	-1.04261	0.106097	-9.82694	8.61999e-23	2.09684e-21
LEMD1	78.7421	-1.5011	0.152869	-9.81954	9.27683e-23	2.25248e-21
NAP1L1	127.016	-0.576754	0.0587723	-9.81337	9.86164e-23	2.39009e-21
AC104117.3	330.386	-1.04415	0.106688	-9.78687	1.28199e-22	3.10139e-21
CCDC28A	46.1314	-0.85854	0.0877269	-9.78651	1.2866e-22	3.10685e-21
CACNB2	833.443	0.555366	0.0567941	9.77858	1.39145e-22	3.35393e-21
ACAT2	28.0957	-1.2411	0.127137	-9.7619	1.64048e-22	3.94699e-21
ZNF708	57.3719	-0.782776	0.0803001	-9.74813	1.87904e-22	4.51276e-21
ZMAT4	135.249	-2.14862	0.220634	-9.73839	2.06809e-22	4.9578e-21
BACH2	142.123	-1.09075	0.112147	-9.72606	2.33461e-22	5.58661e-21
TAPT1-AS1	172.207	-0.658701	0.067745	-9.72323	2.40044e-22	5.73375e-21
KDELR1	26.0126	-1.12025	0.115446	-9.70373	2.90671e-22	6.93054e-21
SYT7	13.8204	-1.82917	0.188518	-9.70292	2.92982e-22	6.97308e-21
TRPV1	28.1466	1.10565	0.114271	9.67564	3.82673e-22	9.0914e-21
SHPK	24.0407	1.16723	0.121018	9.64512	5.15493e-22	1.22249e-20
PNISR	412.969	-0.354756	0.036941	-9.60331	7.7421e-22	1.83276e-20
KIAA1549	72.5892	-1.48908	0.155135	-9.59857	8.10639e-22	1.91557e-20
FCHSD2	304.546	0.429096	0.0447608	9.58644	9.11779e-22	2.15073e-20
MBTPS1	106.407	-0.563746	0.058878	-9.57482	1.02037e-21	2.4026e-20
RAB11FIP4	7.22433	-2.21522	0.231383	-9.5738	1.03043e-21	2.42196e-20
TBC1D16	35.1818	-1.14654	0.119995	-9.55484	1.2378e-21	2.90422e-20
CDCA8	6.7913	-1.5269	0.16013	-9.53539	1.49326e-21	3.49739e-20
SPIN1	153.556	-0.542885	0.0570174	-9.52139	1.7087e-21	3.99493e-20
COL5A1	21.9374	-3.15942	0.332208	-9.51037	1.89994e-21	4.4342e-20
CCDC66	149.842	-0.438268	0.0461312	-9.50046	2.08968e-21	4.86844e-20
PCDH15	208.743	-1.8958	0.199557	-9.50003	2.0983e-21	4.87993e-20
PCDH11Y	32.9609	-2.73818	0.288328	-9.49675	2.16542e-21	5.02719e-20
CHD7	77.095	1.35351	0.142579	9.49305	2.24373e-21	5.19988e-20
STARD4-AS1	138.131	0.701917	0.0740473	9.47931	2.55976e-21	5.9219e-20
PCNX2	203.95	-0.408643	0.0432177	-9.45544	3.21665e-21	7.4286e-20
MICAL3	70.2382	-0.744492	0.0787509	-9.45375	3.26894e-21	7.53622e-20
GAB1	44.8818	-1.15166	0.122062	-9.43508	3.90701e-21	8.99156e-20
AC107072.2	65.9293	-0.83677	0.0887281	-9.43072	4.07271e-21	9.35663e-20
C2CD2	163.04	1.14133	0.121033	9.42991	4.10436e-21	9.41301e-20
AP003025.2	23.5929	-2.59778	0.275785	-9.41957	4.52928e-21	1.03695e-19
PCDH1	13.5407	-1.8775	0.199376	-9.4169	4.64622e-21	1.06189e-19
FAM189A1	5.60612	-2.49127	0.264642	-9.41375	4.78745e-21	1.09228e-19
PCSK1N	95.378	-0.737518	0.0783892	-9.40841	5.03678e-21	1.14719e-19
PIK3C2B	33.1291	1.16948	0.124447	9.39746	5.58969e-21	1.27093e-19
NPDC1	64.9557	-0.771296	0.0820894	-9.3958	5.67856e-21	1.28893e-19
RASGRF2	178.883	1.11142	0.118374	9.38909	6.05196e-21	1.37133e-19
CSMD3	364.332	-2.55971	0.272848	-9.38144	6.50795e-21	1.47213e-19
AC005746.2	28.3193	-1.49008	0.159127	-9.36406	7.6731e-21	1.73273e-19
SNAP25-AS1	576.82	0.463865	0.0495468	9.36216	7.81217e-21	1.76113e-19
MEGF9	90.9975	0.901629	0.0963384	9.35897	8.05167e-21	1.81204e-19
MAP4K3	322.787	0.420229	0.0449439	9.35009	8.75771e-21	1.96759e-19
ARHGAP21	418.425	-0.542696	0.0581157	-9.3382	9.79893e-21	2.19778e-19
C14orf39	11.4934	-2.46783	0.264578	-9.3274	1.08497e-20	2.42933e-19
PID1	41.5609	-2.29718	0.246329	-9.32566	1.10292e-20	2.46537e-19
AC008014.1	26.1246	-1.31926	0.141499	-9.32346	1.12604e-20	2.51279e-19
NR3C2	275.711	-0.469968	0.0505484	-9.29738	1.43953e-20	3.20696e-19
CMIP	98.4256	-0.683155	0.0735347	-9.29024	1.53946e-20	3.42381e-19
CDK14	42.0278	-1.19003	0.128158	-9.2857	1.60643e-20	3.56675e-19
PNMA2	8.66266	-1.97829	0.213354	-9.27236	1.82073e-20	4.03579e-19
ACBD6	366.518	-0.841538	0.0907844	-9.26964	1.86778e-20	4.13317e-19
MCTP1	31.4896	-1.4062	0.152268	-9.23505	2.58163e-20	5.70328e-19
NDRG3	92.787	0.810778	0.087831	9.23111	2.6783e-20	5.90698e-19
ADK	247.225	0.472384	0.0511864	9.2287	2.73934e-20	6.03156e-19
NR2F1-AS1	159.095	1.32577	0.143677	9.22745	2.77149e-20	6.09222e-19
SUB1	92.0696	-0.857627	0.0929448	-9.22727	2.77623e-20	6.0925e-19
NAV3	105.712	-2.37088	0.25731	-9.21412	3.13836e-20	6.87582e-19
ABHD2	62.5656	0.978049	0.106241	9.20597	3.38589e-20	7.40587e-19
DNAJB14	120.943	-0.538194	0.0585264	-9.19574	3.72405e-20	8.13207e-19
PRDM5	90.5803	-0.869091	0.0945928	-9.18771	4.01306e-20	8.74873e-19
SAMD4A	10.65	-2.99012	0.32555	-9.18484	4.12135e-20	8.95531e-19
PNPLA3	78.1739	0.950032	0.103434	9.18487	4.12022e-20	8.95531e-19
RNF157	152.874	0.577905	0.0629634	9.17842	4.37443e-20	9.48965e-19
SLITRK1	16.9865	-2.81949	0.307501	-9.16904	4.7723e-20	1.03358e-18
AC016650.1	8.08948	-3.9418	0.430376	-9.15898	5.23912e-20	1.13283e-18
NKAIN3	96.4337	2.15996	0.236155	9.14637	5.8879e-20	1.27104e-18
AL512662.2	28.7221	-1.59768	0.174706	-9.14496	5.96516e-20	1.28562e-18
AC018462.1	33.7819	1.22669	0.134229	9.13877	6.31689e-20	1.35921e-18
MEIS1-AS2	8.02745	2.65102	0.29018	9.13577	6.49433e-20	1.39512e-18
NSMCE2	279.907	0.486742	0.0533034	9.13153	6.75355e-20	1.44846e-18
LUZP1	40.1063	-0.881066	0.0965498	-9.12551	7.13987e-20	1.52883e-18
ANKRD36C	213.602	-0.400871	0.0439722	-9.11648	7.76048e-20	1.65904e-18
H2AFZ	73.9395	-0.826351	0.0908165	-9.09913	9.10573e-20	1.94349e-18
SCMH1	337.079	-0.359767	0.0395614	-9.0939	9.55474e-20	2.03604e-18
KCNK3	70.0399	-1.79395	0.197335	-9.09089	9.8228e-20	2.08979e-18
LMAN1L	8.10535	2.44529	0.269192	9.08378	1.04864e-19	2.22739e-18
NMNAT3	63.216	-0.95905	0.105743	-9.06966	1.19392e-19	2.53192e-18
KCNC1	95.4314	-0.810272	0.0893718	-9.06631	1.23119e-19	2.60678e-18
AC004147.5	3.10101	-4.04977	0.447252	-9.0548	1.36824e-19	2.89233e-18
CAMTA1	615.043	0.319857	0.0353325	9.05276	1.394e-19	2.94208e-18
GABRB3	2084.46	0.331756	0.0366622	9.04898	1.44304e-19	3.04073e-18
ERC1	400.835	-0.476616	0.0526753	-9.04818	1.45367e-19	3.05825e-18
TMEM59L	70.4374	-0.795467	0.0879737	-9.0421	1.53695e-19	3.22833e-18
ANKRD44	41.8547	-0.868638	0.0961556	-9.03367	1.66008e-19	3.48144e-18
KCTD16	275.445	1.51121	0.167419	9.02655	1.77172e-19	3.70968e-18
NLGN4X	159.162	1.08662	0.120465	9.02022	1.87704e-19	3.92398e-18
AC027287.2	9.62622	-3.06497	0.340141	-9.01087	2.04427e-19	4.26685e-18
ABCD4	41.1	-0.751006	0.0833502	-9.01024	2.056e-19	4.28457e-18
CNTNAP1	48.2563	-0.896622	0.0997163	-8.99174	2.43357e-19	5.06344e-18
PLIN2	5.36732	-2.0599	0.229128	-8.99018	2.4683e-19	5.12764e-18
DOCK10	56.8072	1.75033	0.194758	8.9872	2.53615e-19	5.26032e-18
HDGFL3	128.26	-0.471748	0.0525073	-8.98442	2.60093e-19	5.38625e-18
ZNF445	41.4351	-0.748925	0.0834131	-8.97851	2.74467e-19	5.67503e-18
AL035587.1	38.2076	-0.77941	0.0868123	-8.9781	2.7547e-19	5.6869e-18
ARMC9	74.8687	-0.827916	0.0922413	-8.97555	2.81934e-19	5.81126e-18
HSF4	17.9386	-2.50078	0.278715	-8.97251	2.89836e-19	5.96486e-18
RYR2	969.163	0.769287	0.0857787	8.96828	3.0119e-19	6.1889e-18
PLAGL1	6.51367	-3.20256	0.357326	-8.96257	3.17188e-19	6.50751e-18
PRICKLE2	363.849	0.743785	0.0830103	8.96015	3.24232e-19	6.64173e-18
SORBS1	75.8486	-0.75968	0.0849356	-8.94419	3.74693e-19	7.66353e-18
MPHOSPH9	123.818	0.593255	0.0663352	8.94329	3.77746e-19	7.71406e-18
HIBADH	165.21	0.662771	0.0741302	8.94064	3.86927e-19	7.88938e-18
TRAC	7.81835	-1.79964	0.201348	-8.93795	3.96462e-19	8.07135e-18
VSX2	257.807	-0.584529	0.0654145	-8.93577	4.0435e-19	8.21931e-18
SMAD2	128.818	0.554333	0.062059	8.93236	4.1703e-19	8.46404e-18
CHCHD6	55.9836	-0.702958	0.0788246	-8.918	4.74787e-19	9.62153e-18
TRIO	303.418	0.487189	0.0547966	8.89086	6.06358e-19	1.2269e-17
SGCE	202.332	0.454112	0.0511323	8.88111	6.6194e-19	1.33732e-17
SLC19A1	23.4988	-1.0999	0.123938	-8.87457	7.02065e-19	1.41622e-17
HEATR5A	80.3023	-0.803427	0.090586	-8.86922	7.36593e-19	1.48361e-17
ARHGEF12	292.436	0.394537	0.0445343	8.85916	8.0618e-19	1.6213e-17
FBXO10	31.042	-1.14539	0.129307	-8.85793	8.15167e-19	1.63689e-17
AC005064.1	6.47625	3.62693	0.410025	8.84564	9.10082e-19	1.82195e-17
P3H4	7.4746	-1.58227	0.178875	-8.84569	9.09679e-19	1.82195e-17
ZNF326	204.289	0.564209	0.0637992	8.8435	9.27645e-19	1.85431e-17
DDAH1	24.0647	-1.18782	0.134458	-8.83412	1.00888e-18	2.01364e-17
KLF3-AS1	101.427	-0.608979	0.068974	-8.82911	1.05509e-18	2.10271e-17
ABCD3	80.9752	0.671938	0.0761534	8.82348	1.1096e-18	2.20802e-17
LINC01725	58.5801	2.29802	0.260656	8.81628	1.18328e-18	2.35111e-17
GPC6	1007.61	1.96906	0.223507	8.80983	1.25339e-18	2.48668e-17
NPNT	18.3081	2.68421	0.304869	8.80448	1.31458e-18	2.60417e-17
FAM169A	285.842	0.421261	0.0478652	8.80099	1.35613e-18	2.68247e-17
PCLO	525.48	0.442973	0.050383	8.79213	1.46756e-18	2.89854e-17
GOLM1	39.0093	-0.862619	0.0982063	-8.78374	1.58124e-18	3.11841e-17
LRMDA	93.3959	-1.56908	0.179135	-8.75918	1.96676e-18	3.87295e-17
RCBTB1	23.3102	-0.935433	0.106902	-8.75035	2.12701e-18	4.18227e-17
GCFC2	50.8109	-0.703602	0.0804585	-8.74492	2.23182e-18	4.38186e-17
CSNK1G3	76.5194	-0.859187	0.0983424	-8.73669	2.40044e-18	4.70593e-17
ARHGAP4	16.3687	-1.46922	0.16818	-8.73601	2.41492e-18	4.72731e-17
MKLN1	252.66	-0.349654	0.0400255	-8.73578	2.41984e-18	4.72994e-17
STAT2	40.8383	-0.906035	0.10372	-8.73543	2.4274e-18	4.73774e-17
ZIM2	14.9966	-1.1756	0.134662	-8.72995	2.54788e-18	4.96556e-17
QPCT	24.5599	-1.49745	0.171575	-8.72766	2.60001e-18	5.0597e-17
GOLT1B	54.9437	0.936031	0.107308	8.72285	2.7128e-18	5.27145e-17
PODXL2	54.1243	-0.814127	0.0934559	-8.71134	3.00294e-18	5.82667e-17
LIFR-AS1	11.7426	-1.21518	0.139629	-8.70288	3.23553e-18	6.26879e-17
CLN6	114.675	0.736476	0.084668	8.6984	3.36602e-18	6.51207e-17
SMOC1	16.098	-3.78517	0.435166	-8.69823	3.37112e-18	6.51241e-17
ANGPTL1	81.0711	0.815796	0.0938021	8.69699	3.40793e-18	6.57392e-17
ZDHHC22	15.7925	-1.76485	0.203034	-8.69241	3.54838e-18	6.83489e-17
AL353803.2	18.2421	1.6573	0.190716	8.68986	3.62871e-18	6.97946e-17
MSMO1	54.2826	-1.21303	0.13963	-8.68751	3.70483e-18	7.11553e-17
GRIK1	3188.84	-2.40083	0.276586	-8.68024	3.94919e-18	7.57386e-17
SIPA1L3	190.372	0.638687	0.0736343	8.67376	4.18065e-18	8.00615e-17
SLC8A1	661.474	-1.14269	0.131863	-8.66576	4.48515e-18	8.57687e-17
ATP6V0A1	188.618	-0.447746	0.0516702	-8.66547	4.49672e-18	8.5866e-17
APC	353.698	0.473568	0.054684	8.66008	4.71443e-18	8.98935e-17
CDC42	91.2538	-0.63583	0.0735961	-8.63946	5.64789e-18	1.07538e-16
EYA2	12.6376	3.04113	0.352232	8.63388	5.93075e-18	1.12761e-16
PEX6	76.2581	-0.579939	0.0672541	-8.62311	6.51616e-18	1.23714e-16
KCNMA1-AS1	206.229	0.598678	0.0694389	8.62164	6.60012e-18	1.25128e-16
FSCN1	7.58243	-2.20993	0.256612	-8.61195	7.18286e-18	1.35981e-16
CHD9	558.353	-0.313821	0.0364832	-8.60181	7.84715e-18	1.48345e-16
AC073475.1	26.4035	-1.09504	0.127416	-8.59424	8.38212e-18	1.58232e-16
RNF145	170.543	-0.449879	0.0523954	-8.58623	8.98728e-18	1.69414e-16
TSPAN7	142.885	-0.59219	0.0689989	-8.58259	9.27579e-18	1.74604e-16
TNKS	261.887	-0.352532	0.0410839	-8.58079	9.42248e-18	1.77113e-16
AC024614.4	3.11106	-3.8699	0.45118	-8.57728	9.71457e-18	1.82345e-16
LINC01572	23.3304	1.51811	0.17706	8.57397	9.99782e-18	1.87395e-16
LINC00886	9.65261	-1.91818	0.223738	-8.57333	1.00534e-17	1.8817e-16
SGCZ	13.7826	-3.27757	0.382359	-8.57198	1.01717e-17	1.90117e-16
SLC44A1	65.409	-0.819342	0.0956073	-8.56987	1.03603e-17	1.93369e-16
CHST15	9.80768	-1.7278	0.201676	-8.56725	1.05987e-17	1.97539e-16
GREB1L	372.423	-1.64158	0.19163	-8.56641	1.06763e-17	1.98705e-16
GPI	280.665	0.551366	0.0644535	8.55448	1.18399e-17	2.20053e-16
KDM2A	296.47	0.367841	0.0430286	8.54875	1.2443e-17	2.30936e-16
KAT2A	17.7548	-0.994104	0.116442	-8.5373	1.37392e-17	2.54636e-16
GARNL3	51.5386	-0.787372	0.0922385	-8.53626	1.38642e-17	2.56594e-16
USP45	87.6632	-0.605586	0.0709653	-8.53356	1.41911e-17	2.62278e-16
ADGRL2	2000.1	1.01645	0.119124	8.53268	1.42999e-17	2.6392e-16
AP003025.1	20.1372	-2.28187	0.267465	-8.53147	1.44497e-17	2.66314e-16
JAKMIP3	15.9028	-1.31739	0.154555	-8.52379	1.5441e-17	2.84187e-16
MPZ	5.09164	-1.81196	0.212646	-8.52101	1.58172e-17	2.90707e-16
SLC16A2	17.2199	-1.05295	0.123651	-8.51545	1.6595e-17	3.04579e-16
ZFYVE16	222.728	-0.474674	0.0557914	-8.50802	1.76934e-17	3.24289e-16
RTN1	110.001	-0.857102	0.100778	-8.50488	1.81777e-17	3.32704e-16
PDZRN4	561.951	-2.4253	0.285236	-8.50279	1.85095e-17	3.3831e-16
AP000787.1	116.451	1.27663	0.150307	8.49351	2.00483e-17	3.6593e-16
RGS6	9.57578	3.43605	0.404602	8.49241	2.02388e-17	3.68899e-16
IFNAR2	35.6157	-0.809107	0.0952883	-8.49114	2.04616e-17	3.72447e-16
FAM49B	206.079	0.46244	0.0545232	8.48153	2.22244e-17	4.03978e-16
EZH2	19.277	1.26798	0.149536	8.47947	2.26225e-17	4.1065e-16
AMPD3	74.5019	-0.887835	0.104967	-8.4582	2.71531e-17	4.92215e-16
ADGRV1	250.309	0.624644	0.0739335	8.44873	2.94493e-17	5.33109e-16
TAPT1	53.7783	-0.681795	0.0807793	-8.44022	3.16737e-17	5.72593e-16
PAFAH1B1	328.637	-0.311771	0.0371342	-8.39577	4.62857e-17	8.35605e-16
SCFD1	105.728	-0.493631	0.0588432	-8.38893	4.90602e-17	8.84488e-16
RNASEL	8.97431	-1.49102	0.177813	-8.38533	5.05833e-17	9.10706e-16
CDC14A	16.6074	-2.51607	0.300252	-8.37985	5.29956e-17	9.52841e-16
ELOVL6	106.026	-0.514605	0.0614139	-8.3793	5.3243e-17	9.5599e-16
SLC8A3	261.056	-0.586054	0.0699834	-8.37419	5.56058e-17	9.97062e-16
LAMP5	16.4267	2.17402	0.259817	8.36753	5.88361e-17	1.05356e-15
VPS54	221.167	-0.427775	0.0512668	-8.3441	7.17581e-17	1.28321e-15
PHACTR3	58.7756	-1.03269	0.123825	-8.33995	7.43191e-17	1.32721e-15
LRRC4B	36.388	-0.836657	0.100496	-8.3253	8.41162e-17	1.50015e-15
METTL24	32.113	1.68761	0.20281	8.32115	8.7113e-17	1.5515e-15
BMPR1A	144.333	0.520532	0.0627345	8.29738	1.06429e-16	1.89297e-15
RABGAP1L	516.419	0.405576	0.0489027	8.29353	1.09933e-16	1.95268e-15
IQCK	155.516	0.717637	0.0865364	8.2929	1.10523e-16	1.96052e-15
LINC00461	130.803	0.677887	0.0817574	8.29144	1.11886e-16	1.98205e-15
SLC4A10	979.086	0.355501	0.0429003	8.28668	1.16458e-16	2.06028e-15
PDS5B	190.826	-0.426635	0.0515275	-8.27974	1.23441e-16	2.18091e-15
DSCAM	841.958	-3.00611	0.363547	-8.26884	1.35265e-16	2.38662e-15
SH3GL2	468.999	0.362267	0.0438324	8.26484	1.39883e-16	2.46481e-15
KIAA0895L	94.541	-0.723294	0.0875272	-8.26365	1.4129e-16	2.48628e-15
ITPR1	18.3391	1.68144	0.203479	8.26344	1.41537e-16	2.48732e-15
LAMTOR3	24.2866	-0.98773	0.119582	-8.25988	1.45815e-16	2.55912e-15
GPRC5B	44.015	1.4317	0.173427	8.25535	1.51455e-16	2.65457e-15
LRFN2	52.578	1.00181	0.121364	8.25465	1.52344e-16	2.66663e-15
AC090825.1	13.2738	-3.02291	0.366289	-8.2528	1.54724e-16	2.7047e-15
AC012409.2	53.9042	-3.42044	0.414538	-8.2512	1.56812e-16	2.73759e-15
FBXL8	5.26783	-2.5153	0.304945	-8.24839	1.60549e-16	2.79913e-15
HS3ST4	298.523	1.9607	0.237964	8.2395	1.72939e-16	3.01119e-15
ZNF483	198.383	-0.423291	0.0513944	-8.23614	1.77855e-16	3.09271e-15
JAK2	88.4817	-0.525469	0.0638143	-8.23435	1.80538e-16	3.13525e-15
ERCC6L2	120.614	-0.472592	0.0573995	-8.23339	1.81985e-16	3.15623e-15
KCNMB2-AS1	114.92	1.11291	0.1354	8.21942	2.04483e-16	3.54178e-15
RAB11A	422.296	0.421873	0.0514203	8.20442	2.31713e-16	4.00818e-15
NFIX	33.451	-2.14458	0.261838	-8.19049	2.60163e-16	4.49444e-15
NMNAT2	54.3889	-1.18743	0.145009	-8.18865	2.64172e-16	4.55775e-15
KIF3A	106.795	-0.490244	0.0599067	-8.18346	2.758e-16	4.75216e-15
WTIP	8.80582	-2.51175	0.306951	-8.18291	2.77069e-16	4.76781e-15
TRDMT1	56.4327	0.710493	0.0868866	8.17724	2.90407e-16	4.99085e-15
LRRC1	171.044	0.612195	0.0748801	8.17567	2.94236e-16	5.05009e-15
LINC02240	12.3293	2.35079	0.288192	8.15703	3.43367e-16	5.88573e-15
POLH	25.0341	-0.854809	0.105244	-8.12216	4.57955e-16	7.83974e-15
PPP3CA	653.344	0.333452	0.041057	8.12168	4.59764e-16	7.86054e-15
RAPGEF5	250.229	-0.692382	0.0852905	-8.11793	4.74198e-16	8.09685e-15
CNTN1	588.609	-0.356786	0.0439585	-8.11641	4.80175e-16	8.18834e-15
DNER	120.83	1.04501	0.128994	8.10123	5.44068e-16	9.26595e-15
ZZEF1	114.157	0.482029	0.0595165	8.09908	5.53759e-16	9.41889e-15
FILIP1L	147.593	0.635479	0.0785847	8.08655	6.13779e-16	1.04264e-14
EHBP1	512.951	0.408169	0.0505341	8.07708	6.63333e-16	1.12537e-14
PCDH9-AS3	18.213	2.2545	0.279217	8.07437	6.78237e-16	1.14918e-14
PLCL2	73.1511	-0.924467	0.114555	-8.07005	7.02671e-16	1.18906e-14
RNF212	5.92861	-2.01316	0.249695	-8.06247	7.47657e-16	1.26357e-14
VSTM5	4.50293	-2.25153	0.279397	-8.05854	7.72117e-16	1.30324e-14
PIPOX	14.2088	-1.07242	0.133093	-8.05764	7.77811e-16	1.31118e-14
TIAL1	105.752	-0.488598	0.0606907	-8.05064	8.23642e-16	1.38667e-14
LINC00174	47.7592	-0.709163	0.0881662	-8.04348	8.73228e-16	1.46829e-14
FAM110B	45.2547	-1.59439	0.198306	-8.04008	8.97835e-16	1.50775e-14
MTUS2	737.041	0.599083	0.0745709	8.03374	9.4544e-16	1.58568e-14
FGD6	13.516	1.65411	0.205909	8.03317	9.49823e-16	1.59101e-14
SGIP1	441.16	-0.388764	0.0484085	-8.0309	9.67585e-16	1.61872e-14
MIAT	7.9817	-1.96088	0.244218	-8.02925	9.80679e-16	1.63855e-14
FUT8	89.6021	0.610896	0.0762362	8.0132	1.11759e-15	1.86495e-14
PECR	58.8092	0.917211	0.11459	8.00426	1.20185e-15	2.00251e-14
NCR3LG1	9.15818	-1.63628	0.204429	-8.00414	1.20305e-15	2.00251e-14
RCOR1	49.1762	-0.707015	0.0884073	-7.99725	1.27228e-15	2.11509e-14
AC018643.1	6.14765	-3.44942	0.432046	-7.98393	1.41748e-15	2.35352e-14
GTF3C1	73.0211	-0.642068	0.0804776	-7.97822	1.4846e-15	2.46186e-14
MMP25-AS1	28.525	-0.834911	0.104915	-7.95796	1.749e-15	2.89669e-14
FAM200B	37.8746	-0.90045	0.113237	-7.9519	1.83675e-15	3.03821e-14
SEMA6D	10.4656	-3.67716	0.462545	-7.94984	1.86748e-15	3.08519e-14
ANKRD33B	120.687	1.51053	0.190023	7.94919	1.87731e-15	3.09757e-14
ANK1	66.4597	-1.72919	0.217673	-7.94401	1.95745e-15	3.22577e-14
GAB2	68.4141	-0.908365	0.114453	-7.93657	2.07851e-15	3.42101e-14
TRERF1	128.646	-0.484641	0.0611498	-7.92548	2.27274e-15	3.73605e-14
KBTBD2	32.2217	-0.834215	0.105383	-7.91605	2.45168e-15	4.0252e-14
TMTC1	42.2197	1.39486	0.176338	7.91014	2.571e-15	4.21587e-14
INTS12	62.7727	0.768313	0.0972595	7.89962	2.79761e-15	4.58179e-14
PRKD3	201.571	-0.577975	0.0731862	-7.89733	2.84937e-15	4.66078e-14
CFAP161	9.93138	-1.55132	0.196584	-7.89138	2.98869e-15	4.88264e-14
RNF182	41.8136	-0.923089	0.117061	-7.88551	3.13254e-15	5.11134e-14
MAN2A1	7.64957	-2.19531	0.278636	-7.87878	3.30598e-15	5.38769e-14
UBE3A	201.579	-0.350544	0.0444951	-7.87827	3.31947e-15	5.40302e-14
AC084361.1	57.0887	0.924399	0.117389	7.87468	3.41612e-15	5.5535e-14
RORB	238.964	1.19947	0.152348	7.87324	3.45561e-15	5.61082e-14
DRP2	11.1299	-1.90881	0.242573	-7.86902	3.57422e-15	5.79628e-14
ELMO2	28.0668	-0.746278	0.0949158	-7.86253	3.76456e-15	6.09748e-14
AL138828.1	8.25148	-2.45952	0.31318	-7.85335	4.05067e-15	6.55287e-14
SLC9A7	33.2521	-0.875891	0.11155	-7.85197	4.09543e-15	6.61719e-14
ZFYVE26	30.3922	-0.826155	0.105222	-7.85156	4.10886e-15	6.62272e-14
GSG1L	8.34007	-1.92823	0.245584	-7.85162	4.10688e-15	6.62272e-14
KCNH1	6.56869	-2.0769	0.264552	-7.85066	4.13848e-15	6.66234e-14
KSR1	30.6781	-1.16464	0.148478	-7.84385	4.36942e-15	7.02559e-14
PPARA	40.7616	-0.904356	0.11532	-7.84212	4.42998e-15	7.11431e-14
TBL1XR1	368.011	-0.300445	0.0383182	-7.84081	4.47641e-15	7.18016e-14
CUBN	13.788	1.46174	0.18659	7.83395	4.72769e-15	7.57403e-14
AC211433.1	232.631	0.430794	0.0550095	7.83126	4.83004e-15	7.72865e-14
L3HYPDH	7.25273	-1.53185	0.195708	-7.82726	4.98632e-15	7.96907e-14
AC036108.1	3.74379	-1.93984	0.247917	-7.82453	5.09543e-15	8.13363e-14
IGSF23	12.2203	-3.035	0.388097	-7.82022	5.27331e-15	8.40743e-14
CAMKMT	84.8678	0.752404	0.0963921	7.80565	5.91941e-15	9.42618e-14
GABRR2	490.025	0.752437	0.0964523	7.80113	6.1354e-15	9.75839e-14
TSTD3	82.8977	-0.630646	0.0808585	-7.79938	6.22124e-15	9.88303e-14
LHFPL3-AS1	26.459	-2.22597	0.285446	-7.79823	6.27825e-15	9.96163e-14
TPD52	272.328	0.601216	0.0773723	7.77043	7.82188e-15	1.2396e-13
NDST1	21.9199	1.13336	0.145887	7.76874	7.9268e-15	1.25473e-13
CPNE6	33.7861	1.74617	0.224846	7.76609	8.09457e-15	1.27975e-13
AC245519.1	1.91149	-3.68263	0.474425	-7.76231	8.33973e-15	1.31694e-13
AC040174.1	28.4101	-3.87894	0.499851	-7.76019	8.48033e-15	1.33755e-13
UBR4	78.9888	-0.505666	0.0651993	-7.7557	8.7857e-15	1.38406e-13
SUCLG2-AS1	13.6021	-1.18859	0.153367	-7.74994	9.19325e-15	1.44654e-13
NREP	86.5951	0.688899	0.0889302	7.74652	9.44484e-15	1.48437e-13
PTPRN2	91.6336	-0.779593	0.100682	-7.74316	9.6977e-15	1.5223e-13
HELLS	14.7715	-1.04218	0.134615	-7.74196	9.78964e-15	1.53491e-13
PPARGC1A	14.3286	1.88921	0.244056	7.74087	9.87363e-15	1.54625e-13
LINC00342	134.431	-0.457586	0.0593341	-7.71203	1.23836e-14	1.93702e-13
ZNF536	419.764	0.473768	0.0615037	7.70308	1.32823e-14	2.07514e-13
LINC01833	26.5311	1.46921	0.190782	7.70098	1.35023e-14	2.10703e-13
GOT1	61.3012	0.874538	0.113635	7.69605	1.40336e-14	2.18736e-13
SLC8A2	29.0264	-1.0693	0.138992	-7.69325	1.43448e-14	2.23324e-13
RUBCN	36.1916	-0.711597	0.0926045	-7.68426	1.53887e-14	2.39012e-13
TMEM243	10.3466	-1.33233	0.173381	-7.68438	1.53739e-14	2.39012e-13
IL21R	4.42489	-1.92745	0.251328	-7.66905	1.73277e-14	2.68813e-13
GNB2	10.9779	-1.38875	0.181099	-7.66846	1.74069e-14	2.69726e-13
PPP2R2B	639.679	-0.47888	0.0624693	-7.66585	1.7765e-14	2.74953e-13
Z84485.1	36.2956	-0.762098	0.0994476	-7.66331	1.81195e-14	2.80112e-13
FBXL5	142.126	-0.454015	0.059285	-7.65818	1.88586e-14	2.91197e-13
TARBP1	106.551	-0.481748	0.0629789	-7.64935	2.02002e-14	3.11186e-13
HMGCS1	40.5433	-0.981317	0.128287	-7.64937	2.01965e-14	3.11186e-13
ZNF207	199.385	-0.335295	0.0438456	-7.64717	2.05455e-14	3.16137e-13
PLEKHH1	54.2636	-1.00488	0.131443	-7.64493	2.09056e-14	3.21305e-13
MB21D2	76.0965	-0.911676	0.119272	-7.64366	2.11133e-14	3.24121e-13
CRYBG3	474.269	0.832967	0.109072	7.63685	2.22605e-14	3.41336e-13
CACNG5	9.4915	-2.63657	0.34529	-7.63582	2.2438e-14	3.4366e-13
LPCAT2	41.6159	-1.15709	0.151593	-7.63289	2.29556e-14	3.51181e-13
CDH22	47.9977	-1.18684	0.155551	-7.62992	2.34899e-14	3.58941e-13
KCTD20	51.0389	-0.738204	0.0967985	-7.62619	2.41796e-14	3.68578e-13
AC090993.1	7.8745	1.8756	0.245946	7.62606	2.42042e-14	3.68578e-13
PCDH9-AS4	17.5032	2.22074	0.291203	7.62608	2.41993e-14	3.68578e-13
PIWIL4	3.9981	-2.56581	0.336889	-7.61619	2.6127e-14	3.974e-13
FLNB	6.949	-1.27354	0.167275	-7.61345	2.66881e-14	4.0547e-13
RBFOX3	8.6562	2.39759	0.314981	7.61184	2.70224e-14	4.10077e-13
FAM117A	39.1667	0.747501	0.0982055	7.61159	2.70736e-14	4.10384e-13
ANKRD42	7.37914	-1.34975	0.177364	-7.61006	2.73972e-14	4.14814e-13
KMT2A	239.674	-0.349571	0.0459434	-7.60873	2.76794e-14	4.18608e-13
MZT2A	34.6378	-0.894304	0.117554	-7.60763	2.79157e-14	4.217e-13
CMSS1	176.494	0.494505	0.0650254	7.6048	2.85348e-14	4.3056e-13
AC091820.2	5.74719	-3.46395	0.455728	-7.60091	2.94063e-14	4.43204e-13
ADAR	86.9141	-0.509789	0.0670748	-7.60031	2.95425e-14	4.44751e-13
NTM-AS1	11.2619	-2.37184	0.312292	-7.59493	3.07954e-14	4.63086e-13
LTBP4	35.3049	-1.04868	0.138115	-7.59275	3.13175e-14	4.70402e-13
FAT1	7.20748	-2.28741	0.301314	-7.59148	3.16278e-14	4.74524e-13
BAZ2B	243.208	0.474574	0.0625241	7.59026	3.19255e-14	4.78448e-13
SV2C	6.20394	-2.11166	0.278212	-7.5901	3.19652e-14	4.78502e-13
NRXN3	9483.16	0.210592	0.0277495	7.58904	3.22273e-14	4.81879e-13
CHST8	15.2495	-2.76589	0.365031	-7.57713	3.53296e-14	5.27671e-13
AC078864.1	3.46818	-3.24452	0.428345	-7.57455	3.60363e-14	5.37619e-13
MARS	38.7022	0.834606	0.110196	7.57385	3.62314e-14	5.39921e-13
YPEL5	33.5041	-0.759978	0.100487	-7.56293	3.94088e-14	5.8661e-13
IL10RB	15.7016	-1.00527	0.133323	-7.5401	4.69619e-14	6.98255e-13
SLC19A2	19.3752	-0.977143	0.129676	-7.53527	4.8732e-14	7.23761e-13
AC116565.1	15.6327	-1.21892	0.161886	-7.52948	5.0941e-14	7.55721e-13
MVD	41.2882	-0.719606	0.0956082	-7.52662	5.20714e-14	7.71625e-13
HNRNPR	166.037	-0.36194	0.0481204	-7.52154	5.41362e-14	8.01325e-13
AC009264.1	8.91797	-2.72288	0.362079	-7.52014	5.47165e-14	8.09009e-13
FRMD3	560.51	0.873302	0.116155	7.51844	5.54348e-14	8.18716e-13
CHSY3	11.2277	-2.47551	0.329269	-7.5182	5.55356e-14	8.19289e-13
HLCS	161.95	-0.446028	0.0593759	-7.51194	5.82583e-14	8.58499e-13
LRRN1	26.4655	1.4217	0.189401	7.5063	6.08209e-14	8.95265e-13
NRG1	1727.97	1.50856	0.200987	7.50577	6.10677e-14	8.97898e-13
SRPK3	3.12416	-2.65872	0.354554	-7.49878	6.44127e-14	9.4603e-13
MDGA2	3081.43	-0.343294	0.0458453	-7.4881	6.988e-14	1.02519e-12
AC087457.1	57.879	1.30647	0.17466	7.48011	7.4262e-14	1.08827e-12
GPHN	1509.64	-0.189766	0.0254042	-7.46986	8.02828e-14	1.1752e-12
GRID2	1673.04	-1.46608	0.196569	-7.45834	8.76179e-14	1.28116e-12
SLC17A7	196.867	0.627584	0.0842204	7.45168	9.21592e-14	1.34607e-12
LMCD1	7.96404	2.0378	0.273478	7.45142	9.23386e-14	1.34721e-12
FMN2	409.226	-0.47262	0.0634385	-7.45005	9.3307e-14	1.35984e-12
LRRC39	49.9572	1.06965	0.143645	7.4465	9.58503e-14	1.39536e-12
SYCP3	10.5996	-1.08217	0.145448	-7.44024	1.00504e-13	1.4615e-12
ZPBP	904.034	-1.44515	0.194313	-7.43726	1.02797e-13	1.49321e-12
FTX	1134.48	-0.235584	0.0316983	-7.43206	1.06921e-13	1.55141e-12
ELOVL5	53.8933	-0.748101	0.100698	-7.42919	1.09266e-13	1.5837e-12
NUCB2	106.716	-0.490653	0.0660748	-7.42571	1.12173e-13	1.62405e-12
ADGRL1	100.233	-0.530082	0.0715493	-7.40862	1.27625e-13	1.84575e-12
FRMD4B	60.8721	-1.04859	0.141619	-7.40432	1.31829e-13	1.90262e-12
FRMD5	345.421	-0.934024	0.126146	-7.4043	1.31844e-13	1.90262e-12
ROR1	103.614	-2.38937	0.322942	-7.39875	1.37473e-13	1.98167e-12
DGKH	77.1015	1.27566	0.172481	7.39597	1.40381e-13	2.02139e-12
CNOT4	134.179	-0.428493	0.057997	-7.38819	1.48841e-13	2.14089e-12
HOOK2	182.066	-0.378054	0.0512152	-7.38167	1.56312e-13	2.2459e-12
C1orf216	7.37743	-1.50126	0.203425	-7.37993	1.58373e-13	2.27305e-12
KIAA1958	185.987	0.432728	0.058678	7.37461	1.64821e-13	2.36303e-12
RAP1A	68.4291	0.623707	0.0845864	7.37361	1.66067e-13	2.37832e-12
AC051619.6	20.3771	-0.808244	0.109647	-7.37136	1.68891e-13	2.41614e-12
KDM7A	48.5808	0.913921	0.124024	7.3689	1.72042e-13	2.45857e-12
ZFPM2-AS1	22.3242	-2.86958	0.389816	-7.36137	1.82039e-13	2.59862e-12
SERPINE2	5.08109	2.81029	0.381812	7.36039	1.83369e-13	2.61479e-12
PGM5	169.993	0.907201	0.12332	7.35647	1.88832e-13	2.68979e-12
SLC39A10	44.3746	-0.704261	0.0957437	-7.35568	1.89953e-13	2.70285e-12
DOK5	53.856	-1.99298	0.271243	-7.34758	2.01823e-13	2.86866e-12
AC069549.1	4.64143	-3.17993	0.432901	-7.34563	2.04799e-13	2.90783e-12
CCDC138	101.764	-0.578664	0.0788171	-7.34185	2.1066e-13	2.98785e-12
ZNF480	15.0497	-0.954907	0.130239	-7.33198	2.26771e-13	3.21291e-12
NPAS3	375.535	-1.40828	0.1922	-7.32714	2.35107e-13	3.32746e-12
CCNY	225.233	0.397406	0.0542742	7.32218	2.43967e-13	3.44916e-12
CRMP1	171.24	-0.541472	0.074035	-7.31374	2.59815e-13	3.6693e-12
USP48	202.547	-0.346029	0.0473278	-7.31134	2.64485e-13	3.73127e-12
TMEM213	5.90667	-2.36151	0.323122	-7.30843	2.7029e-13	3.8091e-12
AC093627.3	4.78195	-1.70159	0.233106	-7.29962	2.88576e-13	4.06247e-12
WDR41	123.22	0.443646	0.0607873	7.29834	2.9135e-13	4.09717e-12
PPM1J	4.99004	-2.15621	0.295447	-7.29815	2.9176e-13	4.09858e-12
CHD8	58.4781	-0.570421	0.0781685	-7.29733	2.93524e-13	4.11899e-12
TPST1	118.119	-0.498955	0.0684444	-7.28993	3.10106e-13	4.34706e-12
B3GALNT2	114.798	0.576291	0.0790736	7.28803	3.14516e-13	4.40422e-12
HMGCR	33.832	-0.864426	0.118713	-7.28163	3.2982e-13	4.61364e-12
ITGB8	49.6529	-1.79128	0.246166	-7.27671	3.42053e-13	4.77971e-12
KLHL32	11.4376	2.02566	0.278517	7.27301	3.51552e-13	4.90356e-12
ZNF821	55.3125	-0.600378	0.0825492	-7.27297	3.51657e-13	4.90356e-12
SESN1	141.357	0.478236	0.0658667	7.26066	3.85207e-13	5.36573e-12
PCSK6	40.1059	1.29862	0.178867	7.26025	3.86363e-13	5.37618e-12
PAQR9	9.99375	1.9991	0.275501	7.25623	3.98033e-13	5.53275e-12
MAP6	140.107	-0.439493	0.060613	-7.25081	4.14282e-13	5.75256e-12
SMAD3	34.285	-1.01234	0.139628	-7.25023	4.1607e-13	5.77134e-12
TRIB2	33.0201	-0.881709	0.121666	-7.24695	4.26271e-13	5.90665e-12
ANKRD12	596.421	-0.226474	0.0312573	-7.24547	4.30951e-13	5.96524e-12
CDH12	1034.77	1.6134	0.222741	7.24342	4.37514e-13	6.04976e-12
PEA15	72.9442	-0.64927	0.089638	-7.24325	4.38074e-13	6.05118e-12
MT-ND4	664.032	-0.801997	0.110865	-7.23399	4.69006e-13	6.4717e-12
PLCB4	931.147	0.381935	0.0528063	7.23276	4.73288e-13	6.52398e-12
L3MBTL4	12.3093	-2.46851	0.341491	-7.22862	4.87932e-13	6.71884e-12
TMEM164	32.7497	-0.860642	0.119159	-7.22261	5.09993e-13	7.01532e-12
SEC31B	52.9149	-0.652658	0.0903695	-7.2221	5.1189e-13	7.0341e-12
NAALAD2	27.1186	-1.05679	0.146333	-7.22181	5.1299e-13	7.0419e-12
VCL	36.0067	0.830538	0.115009	7.22151	5.14137e-13	7.05034e-12
XYLT1	106.184	1.04308	0.144451	7.22096	5.16227e-13	7.07167e-12
GCC2	177.957	-0.420642	0.058268	-7.21909	5.23384e-13	7.16229e-12
SLC24A3	296.189	-2.13386	0.295603	-7.21867	5.24975e-13	7.17665e-12
AC132803.1	34.6184	2.45716	0.340451	7.21737	5.30034e-13	7.23833e-12
RAI14	10.2427	-2.24932	0.311914	-7.21134	5.54036e-13	7.5583e-12
LEMD1-AS1	7.23841	-1.34543	0.186629	-7.20912	5.6314e-13	7.67072e-12
TULP4	130.8	0.584937	0.0811392	7.20905	5.63435e-13	7.67072e-12
EIF2AK2	55.0731	-0.598336	0.083087	-7.20131	5.96358e-13	8.11059e-12
LINC02552	88.3001	1.92033	0.266767	7.19851	6.08736e-13	8.27044e-12
CACNA2D3	93.7647	1.46832	0.204063	7.19539	6.22828e-13	8.45321e-12
PAWR	7.40689	-3.19415	0.443979	-7.19437	6.27499e-13	8.50789e-12
DPYSL4	37.2573	-0.905459	0.125876	-7.19327	6.32555e-13	8.56765e-12
CALY	83.0734	-0.857079	0.119164	-7.19246	6.36342e-13	8.61014e-12
LIMCH1	327.374	0.670254	0.093248	7.18786	6.58153e-13	8.89616e-12
SHISA6	32.8422	-1.57681	0.219806	-7.17362	7.30415e-13	9.86284e-12
SLC29A1	17.1773	-1.10029	0.153498	-7.16814	7.60241e-13	1.02551e-11
ATP6V1G1	63.6717	-0.752672	0.105029	-7.16632	7.7038e-13	1.03813e-11
SLC9A5	6.84224	-1.40482	0.196225	-7.15924	8.11246e-13	1.09209e-11
EML6	210.551	0.539971	0.075447	7.15696	8.24833e-13	1.10925e-11
ZNF676	22.337	-1.27696	0.178462	-7.15536	8.34514e-13	1.12113e-11
MEP1B	25.6723	0.961105	0.134429	7.14954	8.70675e-13	1.16852e-11
SESTD1	119.169	-0.42933	0.0600633	-7.14797	8.80726e-13	1.18081e-11
WAC-AS1	61.6629	-0.662316	0.0926957	-7.14506	8.99578e-13	1.20487e-11
STAT3	119.373	-0.530868	0.0743341	-7.14165	9.22168e-13	1.23388e-11
GALNT8	13.0422	-1.12741	0.157883	-7.1408	9.27914e-13	1.24031e-11
DCLK3	3.95838	2.38004	0.333441	7.13781	9.48304e-13	1.26629e-11
SLC4A8	244.48	-0.390637	0.0547854	-7.13031	1.00143e-12	1.33589e-11
AC245187.1	6.21985	-2.85347	0.400625	-7.12255	1.05946e-12	1.41186e-11
SORCS2	401.877	-0.390977	0.0549057	-7.12088	1.07236e-12	1.42762e-11
AC011900.1	61.8276	2.55093	0.358581	7.11397	1.12749e-12	1.49951e-11
AC093879.1	32.0732	1.02929	0.144857	7.10558	1.1982e-12	1.59195e-11
NTNG2	65.4526	0.746865	0.105186	7.1004	1.24393e-12	1.65105e-11
C1orf115	20.8152	-1.21482	0.17112	-7.09925	1.25438e-12	1.66325e-11
ITGA3	27.9959	-0.856035	0.120731	-7.09045	1.33676e-12	1.77071e-11
C14orf132	38.3308	-0.970044	0.136822	-7.08983	1.34278e-12	1.7769e-11
HIF3A	16.7938	-2.15532	0.304032	-7.08911	1.34975e-12	1.78434e-11
PHF14	197.916	-0.38693	0.0546125	-7.08501	1.39031e-12	1.83613e-11
AC137770.1	52.3928	2.36019	0.333343	7.08035	1.43789e-12	1.89707e-11
KCNAB3	17.3692	-0.834241	0.117958	-7.07237	1.52311e-12	2.00678e-11
RBMX	112.859	-0.413085	0.0584091	-7.07228	1.52408e-12	2.00678e-11
LINGO2	328.936	-1.76578	0.249918	-7.06543	1.6012e-12	2.10623e-11
CORO1C	17.8519	-0.965999	0.136952	-7.05355	1.74412e-12	2.28967e-11
GNAO1	390.322	-0.32701	0.0463606	-7.05363	1.74309e-12	2.28967e-11
PTPN13	25.51	-2.24426	0.318203	-7.05291	1.75219e-12	2.29799e-11
FAAH2	52.3837	-1.01653	0.144186	-7.05013	1.78749e-12	2.34196e-11
DERA	12.1998	-1.50049	0.212928	-7.04695	1.82879e-12	2.39371e-11
PLEKHM2	43.9862	-0.67307	0.0955188	-7.04647	1.8351e-12	2.39959e-11
AL078459.1	11.142	-1.10013	0.156198	-7.04318	1.87897e-12	2.45453e-11
TSPAN5	200.419	-0.53877	0.0765023	-7.04254	1.88772e-12	2.46354e-11
PIEZO1	3.8246	-2.47275	0.351599	-7.03286	2.02345e-12	2.63806e-11
AL589935.1	4.55675	-2.19104	0.311657	-7.0303	2.06089e-12	2.68422e-11
NXPH3	8.90566	-2.03907	0.290059	-7.02986	2.06735e-12	2.68999e-11
LIMS1	243.209	-0.424965	0.0604652	-7.02826	2.09119e-12	2.71834e-11
SYT9	144.576	0.626617	0.08916	7.028	2.09512e-12	2.72077e-11
GSN	16.6352	1.54936	0.220483	7.02714	2.10811e-12	2.73497e-11
SDC2	44.5731	1.18807	0.169174	7.02275	2.17537e-12	2.81945e-11
JPH4	107.464	-0.557458	0.0793863	-7.0221	2.18565e-12	2.83002e-11
GTF2IRD1	277.725	0.332162	0.0473047	7.02175	2.19113e-12	2.83434e-11
OPTC	3.61469	-3.09224	0.440415	-7.0212	2.19971e-12	2.84263e-11
CHKA	38.495	-0.625992	0.0891592	-7.02106	2.20184e-12	2.84263e-11
QKI	142.483	0.938284	0.133802	7.01249	2.34113e-12	3.01951e-11
GABRG1	4.67948	-1.58431	0.225951	-7.01173	2.35397e-12	3.03311e-11
LARP1	79.6525	-0.480795	0.0685832	-7.01039	2.37656e-12	3.05925e-11
MARK1	324.511	-0.353037	0.0503623	-7.00994	2.38423e-12	3.06315e-11
CASC18	10.2347	-3.12777	0.446183	-7.01005	2.38237e-12	3.06315e-11
LINC01933	106.372	-1.25109	0.178497	-7.00905	2.39944e-12	3.07971e-11
TRNP1	107.357	-0.769235	0.109778	-7.0072	2.43127e-12	3.11754e-11
HDAC4	94.5517	-0.554934	0.0792494	-7.00238	2.51652e-12	3.22372e-11
CEP112	445.08	0.573932	0.0819836	7.00056	2.54933e-12	3.2626e-11
AC008771.1	177.681	-0.429536	0.0613657	-6.99962	2.56666e-12	3.28161e-11
FSD1L	91.324	0.621131	0.0887874	6.99572	2.63905e-12	3.3709e-11
PCBP1-AS1	164.896	-0.389499	0.0557173	-6.99063	2.73649e-12	3.49199e-11
EVI5L	40.874	-0.60395	0.0864385	-6.98705	2.80726e-12	3.57886e-11
MT-CO1	649.809	-0.743707	0.106469	-6.98523	2.84387e-12	3.62204e-11
RAB26	85.3002	-0.852194	0.122012	-6.9845	2.85882e-12	3.63757e-11
POU2F2	70.8361	-0.656857	0.0940527	-6.98392	2.87051e-12	3.64894e-11
LINC01886	7.14404	-2.90674	0.416377	-6.98103	2.9302e-12	3.72124e-11
RNF152	62.2248	0.880538	0.126238	6.97523	3.05366e-12	3.87432e-11
MIR222HG	8.3346	2.41111	0.345936	6.96984	3.17312e-12	4.02202e-11
AC015878.1	50.4556	-1.68285	0.241524	-6.96764	3.22306e-12	4.08141e-11
SESN3	182.494	0.870322	0.124927	6.96665	3.24584e-12	4.10633e-11
SLC8A1-AS1	101.223	-1.04151	0.149515	-6.96594	3.26213e-12	4.123e-11
NRG2	164.299	0.50935	0.0731276	6.96522	3.27886e-12	4.13859e-11
LRP4	9.83283	2.35886	0.338667	6.96514	3.28072e-12	4.13859e-11
WWP1	110.131	0.441353	0.0633712	6.96456	3.2944e-12	4.15189e-11
MTCL1	324.489	-0.348856	0.0501045	-6.96257	3.34127e-12	4.20695e-11
HHIP-AS1	6.50586	-2.12196	0.305046	-6.95622	3.49535e-12	4.39676e-11
BRINP1	49.9328	-0.992541	0.142721	-6.95441	3.54048e-12	4.44931e-11
PPP1R12B	218.226	-0.354853	0.0510827	-6.94664	3.74088e-12	4.69668e-11
MGAT5B	4.80286	-1.68959	0.243301	-6.94445	3.79946e-12	4.76571e-11
SNAP25	769.521	0.296363	0.0426988	6.94078	3.89952e-12	4.88658e-11
SEC24D	17.4975	1.06216	0.153273	6.92982	4.2138e-12	5.27542e-11
SPOP	93.3517	-0.53777	0.0776231	-6.92797	4.26936e-12	5.33993e-11
PRR16	201.546	-1.65506	0.239177	-6.91982	4.52208e-12	5.65068e-11
LNX1	12.8022	-1.39795	0.202067	-6.91824	4.57279e-12	5.70865e-11
RPLP0	107.019	-0.569713	0.082393	-6.91457	4.69272e-12	5.85286e-11
VANGL1	3.31749	-2.72666	0.394531	-6.91113	4.80794e-12	5.99091e-11
TP63	8.38358	-3.02401	0.437641	-6.9098	4.85338e-12	6.04185e-11
IGSF9B	92.6867	-0.610823	0.0884943	-6.9024	5.11301e-12	6.35906e-11
ADCY9	93.3692	-0.500004	0.0725181	-6.89488	5.39097e-12	6.69848e-11
CCSER2	275.049	-0.324839	0.0471223	-6.89354	5.44192e-12	6.75543e-11
TAF7L	3.48007	-2.36195	0.342718	-6.89181	5.5087e-12	6.83192e-11
RNF150	288.847	0.441905	0.0641412	6.88957	5.59632e-12	6.93409e-11
IGF1	161.761	0.608973	0.0883993	6.88888	5.62317e-12	6.96084e-11
ABR	164.494	-0.522887	0.0759122	-6.88805	5.65618e-12	6.99516e-11
AP000943.2	4.00732	-2.1957	0.319105	-6.88082	5.95074e-12	7.35259e-11
PANK3	46.1775	-0.632207	0.0919256	-6.87738	6.09649e-12	7.52564e-11
AC090531.1	32.489	-2.66855	0.388076	-6.87635	6.14044e-12	7.56705e-11
ZNF429	58.899	-0.56955	0.0828277	-6.87633	6.14147e-12	7.56705e-11
MPPED1	5.0998	2.10448	0.306309	6.87045	6.40006e-12	7.87832e-11
HLA-B	24.3488	-1.13903	0.165812	-6.86942	6.44613e-12	7.92766e-11
BLACAT1	10.886	-1.26723	0.18459	-6.86514	6.6426e-12	8.16171e-11
RORB-AS1	35.0557	1.66424	0.242767	6.85531	7.11589e-12	8.73512e-11
C5orf63	32.9004	1.51787	0.221681	6.84709	7.53684e-12	9.24328e-11
DENND5B	366.029	0.286965	0.0419242	6.84485	7.65557e-12	9.3802e-11
CYHR1	39.0252	-0.659023	0.0962844	-6.84455	7.6715e-12	9.39102e-11
ASTN2-AS1	6.84524	-1.34057	0.195922	-6.84236	7.78999e-12	9.52726e-11
AP3B1	111.378	0.716469	0.104721	6.84172	7.82486e-12	9.56107e-11
ANO3	22.0555	-1.3139	0.192264	-6.83384	8.26705e-12	1.00921e-10
NARF	56.7462	-0.521656	0.0763425	-6.8331	8.3098e-12	1.01349e-10
GTF2I	466.733	0.243085	0.0355816	6.83177	8.38718e-12	1.02198e-10
AC093821.1	9.77994	-3.11712	0.456349	-6.83056	8.45862e-12	1.02974e-10
GPC6-AS1	7.22847	1.80148	0.263979	6.82434	8.83275e-12	1.0743e-10
AP003086.1	59.833	-0.739809	0.108428	-6.82304	8.91326e-12	1.0831e-10
AC020909.2	5.72956	-2.8805	0.422323	-6.82062	9.06496e-12	1.10052e-10
C3orf14	33.3353	-0.822513	0.120608	-6.8197	9.12309e-12	1.10656e-10
STS	89.3991	1.0858	0.159268	6.81745	9.2668e-12	1.12296e-10
DOCK9	166.883	0.53281	0.0781588	6.81703	9.29448e-12	1.12529e-10
GSTK1	15.6954	-0.869752	0.127635	-6.81435	9.46878e-12	1.14534e-10
ROR1-AS1	9.47048	-3.22914	0.473952	-6.81322	9.54397e-12	1.15338e-10
TMEM64	6.60578	-1.46044	0.214405	-6.8116	9.65181e-12	1.16535e-10
LRRC37A3	141.187	-0.381522	0.0560248	-6.80988	9.76789e-12	1.17829e-10
VPS36	234.921	0.367949	0.0540473	6.80791	9.90269e-12	1.19346e-10
MAST4	69.5107	-1.04079	0.15291	-6.80655	9.99644e-12	1.20367e-10
AC073316.3	2.17056	-3.12779	0.459735	-6.80345	1.02141e-11	1.22876e-10
INPP5B	57.8755	0.540709	0.0794802	6.80306	1.02418e-11	1.23097e-10
EFS	8.5362	-1.08763	0.159889	-6.80243	1.02869e-11	1.23526e-10
GLG1	193.209	0.350107	0.0514847	6.80022	1.04461e-11	1.25325e-10
SRGAP2B	42.0968	-0.902209	0.132694	-6.79916	1.05233e-11	1.26136e-10
METTL9	39.3538	-0.692103	0.101811	-6.79789	1.06163e-11	1.27136e-10
RANBP2	167.027	-0.423898	0.0623655	-6.797	1.06822e-11	1.27809e-10
AC097716.1	26.8668	-2.94482	0.433487	-6.79332	1.09585e-11	1.30997e-10
FOXP4	4.39375	-1.82889	0.269419	-6.78827	1.13486e-11	1.35538e-10
ZDHHC14	65.1285	0.743218	0.109491	6.78793	1.13751e-11	1.35732e-10
FADS2	33.1192	-0.737566	0.108696	-6.7856	1.15607e-11	1.37822e-10
CCNG2	133.079	-0.537638	0.0792589	-6.78331	1.17453e-11	1.39897e-10
ZMIZ1	107.768	0.527448	0.0778081	6.77883	1.21153e-11	1.44174e-10
CCDC141	87.1029	1.87759	0.277259	6.77196	1.27047e-11	1.51052e-10
ANKS6	61.3211	-1.54461	0.228522	-6.75911	1.38843e-11	1.64929e-10
TBC1D32	187.402	-0.496733	0.0734999	-6.75828	1.39643e-11	1.6573e-10
PKD1	67.2076	-0.532913	0.0788815	-6.75586	1.41991e-11	1.68366e-10
CAMK2N1	111.059	-0.694143	0.102873	-6.74757	1.50338e-11	1.78104e-10
SCG5	43.8443	-0.82205	0.121868	-6.74539	1.52612e-11	1.80637e-10
ARHGEF4	14.3197	-0.995739	0.14773	-6.74028	1.58087e-11	1.86949e-10
KATNBL1	183.195	0.355227	0.0527117	6.73906	1.59415e-11	1.88351e-10
GLYATL2	15.5027	-1.10884	0.164619	-6.73583	1.62996e-11	1.92411e-10
FDPS	58.7297	-0.56946	0.0845579	-6.73456	1.64427e-11	1.93927e-10
ST6GALNAC2	5.73975	2.13719	0.317463	6.73208	1.67253e-11	1.97085e-10
PSD3	248.745	-0.818028	0.121518	-6.73176	1.67618e-11	1.97339e-10
DNM1	224.803	0.367749	0.0546471	6.72953	1.70217e-11	2.0022e-10
LAMC1	11.4092	-2.26262	0.336458	-6.72483	1.75796e-11	2.066e-10
MAPKBP1	31.1598	-0.603712	0.0897791	-6.72442	1.76295e-11	2.07002e-10
GNG13	79.6056	0.797905	0.118664	6.72405	1.76741e-11	2.07342e-10
BBS2	48.0454	-0.521442	0.077571	-6.72212	1.79093e-11	2.09915e-10
PCOLCE	7.4386	-1.82466	0.271506	-6.72054	1.81058e-11	2.1203e-10
PPP2R5A	61.8746	-0.687742	0.102548	-6.70653	1.99314e-11	2.33202e-10
ARGLU1	363.028	-0.273069	0.0407208	-6.70589	2.0018e-11	2.34009e-10
NRP2	59.2409	2.21729	0.330767	6.70348	2.0352e-11	2.37703e-10
CNTNAP2	1253.61	-0.993086	0.148161	-6.70275	2.04538e-11	2.38682e-10
CABP1	130.292	-0.884183	0.131932	-6.70179	2.05886e-11	2.40043e-10
ACE	4.8876	-2.18691	0.326471	-6.69863	2.10386e-11	2.45074e-10
LHX4	122.202	-1.08011	0.161263	-6.6978	2.11584e-11	2.46252e-10
CIB4	9.23839	-2.78035	0.415183	-6.69667	2.13221e-11	2.4794e-10
AL050403.2	25.2281	1.96799	0.293968	6.69456	2.16319e-11	2.51321e-10
PPA2	151.835	0.39124	0.0584485	6.69376	2.17509e-11	2.52483e-10
AC007001.1	49.9396	-3.48176	0.52105	-6.68219	2.35391e-11	2.73e-10
PAGR1	73.2983	-0.655893	0.0982035	-6.67892	2.40713e-11	2.78927e-10
SLC25A12	154.822	0.358643	0.0537767	6.66912	2.57334e-11	2.97927e-10
CCDC148-AS1	10.3547	-1.0995	0.164937	-6.66617	2.62565e-11	3.03716e-10
MYO15A	5.04315	-1.50917	0.226422	-6.66531	2.64115e-11	3.05243e-10
IQSEC1	202.937	0.407315	0.0611349	6.66256	2.69096e-11	3.10647e-10
ARHGAP20	20.7053	-2.1849	0.327942	-6.66247	2.69261e-11	3.10647e-10
LRRC8C	13.0873	-1.52388	0.228803	-6.66021	2.73435e-11	3.15189e-10
HEATR3	27.8857	-0.839765	0.126134	-6.65774	2.78079e-11	3.20262e-10
KBTBD12	9.45281	1.6872	0.253526	6.65493	2.8343e-11	3.26141e-10
PDE4A	27.5578	-0.863298	0.129822	-6.64984	2.9342e-11	3.37343e-10
AL589843.1	59.555	-0.566957	0.0853041	-6.6463	3.00554e-11	3.45246e-10
LINC01176	11.4195	1.43149	0.215565	6.64065	3.12307e-11	3.58436e-10
CPLX3	109.405	0.758642	0.114285	6.63818	3.17585e-11	3.64177e-10
SKOR2	43.4489	-1.26921	0.191262	-6.63596	3.22388e-11	3.69365e-10
PTPRR	377.884	1.67226	0.252346	6.62686	3.42904e-11	3.9253e-10
NECTIN2	10.1569	-1.49295	0.225601	-6.61766	3.64917e-11	4.17368e-10
AC005062.1	100.631	-3.22643	0.487882	-6.61314	3.7624e-11	4.29947e-10
CYP7B1	57.0005	-0.901343	0.136433	-6.60647	3.93595e-11	4.49283e-10
PLEKHA7	32.4321	2.04991	0.310293	6.60638	3.9384e-11	4.49283e-10
PRDM2	95.6359	-0.44002	0.0667122	-6.59578	4.23012e-11	4.82146e-10
PRPSAP2	76.6124	0.480221	0.0728088	6.59565	4.23403e-11	4.82176e-10
SLC35F1	202.371	0.916699	0.139241	6.58355	4.59352e-11	5.22666e-10
SLAIN1	64.1358	-0.512839	0.0779046	-6.58291	4.61327e-11	5.24462e-10
AP000844.2	6.91925	-1.8431	0.280035	-6.58169	4.6514e-11	5.28343e-10
NUMB	103.898	0.523186	0.0795038	6.58064	4.68432e-11	5.31626e-10
TERF2IP	215.359	-0.406498	0.0618004	-6.57761	4.78085e-11	5.42117e-10
CACNA1I	29.2038	-1.25505	0.190868	-6.5755	4.84905e-11	5.49379e-10
AHSA1	23.6062	-0.81686	0.124262	-6.57369	4.90848e-11	5.55637e-10
DMD	1011.04	-1.58291	0.24084	-6.57246	4.94904e-11	5.59749e-10
MAN1A2	133.575	-0.404388	0.0615377	-6.57139	4.98468e-11	5.63299e-10
MPZL1	28.346	-0.696871	0.10605	-6.57113	4.99357e-11	5.63821e-10
PRTFDC1	77.5787	-0.583468	0.08881	-6.56984	5.03687e-11	5.68226e-10
DDI2	31.2151	-0.756848	0.115218	-6.56883	5.07121e-11	5.71547e-10
SHC2	10.3694	-1.48263	0.225711	-6.56872	5.07495e-11	5.71547e-10
FLG-AS1	27.9327	-0.936777	0.142757	-6.56205	5.30747e-11	5.97226e-10
PREPL	176.002	0.385647	0.0589044	6.54699	5.8708e-11	6.60053e-10
DGKE	243.439	0.498155	0.0761672	6.54028	6.1404e-11	6.89778e-10
MIR137HG	13.3934	-3.08004	0.471177	-6.53692	6.28004e-11	7.04867e-10
C2orf27A	21.5877	-0.821039	0.125624	-6.5357	6.33109e-11	7.09994e-10
ATP2B1-AS1	29.6305	0.924211	0.14152	6.5306	6.55079e-11	7.3401e-10
NDRG1	104.898	1.28282	0.19647	6.52935	6.60541e-11	7.39504e-10
CAMSAP2	234.819	-0.31902	0.0489159	-6.52181	6.94641e-11	7.77024e-10
SH3PXD2B	2.99987	-2.32708	0.356839	-6.52138	6.96624e-11	7.78583e-10
AC005906.2	10.9228	2.16522	0.332043	6.52091	6.98834e-11	7.80394e-10
WDR17	97.0103	-0.474884	0.0728652	-6.5173	7.15846e-11	7.98718e-10
ST6GALNAC5	386.374	-0.776693	0.119203	-6.5157	7.23497e-11	8.06574e-10
GSTM3	12.1298	-0.99927	0.153405	-6.51392	7.32168e-11	8.15554e-10
SLC16A7	67.2707	0.649771	0.0997551	6.51366	7.33414e-11	8.16254e-10
NPM2	38.9019	-0.864204	0.132689	-6.513	7.3663e-11	8.19144e-10
NTN4	8.70618	-2.51432	0.386311	-6.50853	7.58904e-11	8.43205e-10
SHISA5	29.1375	-0.904556	0.138985	-6.50828	7.60162e-11	8.43895e-10
TMEM200A	85.4487	1.57126	0.241565	6.50452	7.79431e-11	8.64561e-10
ZNF644	136.802	-0.358951	0.0552117	-6.50136	7.95993e-11	8.82193e-10
GPR158	28.267	-1.45736	0.224296	-6.49749	8.16731e-11	9.04418e-10
FCHSD1	4.1911	-1.95526	0.300995	-6.49599	8.24869e-11	9.12667e-10
SLC35G2	20.7077	-0.857789	0.132109	-6.49306	8.41121e-11	9.29871e-10
KCNMB4	134.526	1.86556	0.287366	6.49192	8.47502e-11	9.36143e-10
MS4A6E	3.12257	-3.23113	0.498143	-6.48635	8.79387e-11	9.70553e-10
FAM153B	5.44093	-1.77123	0.273233	-6.48249	9.02238e-11	9.94943e-10
VSTM2A	53.2306	1.51069	0.233102	6.48082	9.12243e-11	1.00514e-09
DFFB	14.7834	-0.881026	0.136012	-6.47755	9.32242e-11	1.02632e-09
SCARB1	16.6283	-1.0299	0.159005	-6.47715	9.34738e-11	1.02821e-09
MED7	18.5267	-0.902976	0.139414	-6.47694	9.36013e-11	1.02876e-09
LEKR1	35.4794	-0.687898	0.106258	-6.47383	9.55478e-11	1.04928e-09
FAM13C	19.693	-1.23671	0.191143	-6.47008	9.79534e-11	1.07481e-09
IRS1	32.9978	0.678152	0.104875	6.46627	1.0045e-10	1.10129e-09
RALGAPA2	300.387	-0.435029	0.067287	-6.46528	1.01109e-10	1.1076e-09
SLC4A7	203.916	-0.679453	0.105141	-6.46231	1.03119e-10	1.12775e-09
SLC5A4-AS1	8.54217	-1.25381	0.194018	-6.46234	1.03098e-10	1.12775e-09
UBR5	270.762	-0.270211	0.0418338	-6.45916	1.05288e-10	1.15052e-09
AC018682.1	35.5357	1.00082	0.154966	6.45834	1.05855e-10	1.15576e-09
CARS	23.5291	0.890778	0.137964	6.45661	1.07077e-10	1.16813e-09
AC004594.1	10.4739	-3.46137	0.536478	-6.45204	1.10358e-10	1.20294e-09
TRIM32	8.26893	-1.13361	0.175729	-6.45089	1.11198e-10	1.2111e-09
MPHOSPH8	210.937	-0.308106	0.0478051	-6.44505	1.1556e-10	1.25757e-09
CXCR4	3.6705	-2.30139	0.357225	-6.44242	1.17582e-10	1.27852e-09
CHN1	120.447	-0.549396	0.085407	-6.43269	1.25368e-10	1.36206e-09
TGFBR1	32.3241	-0.820198	0.127544	-6.4307	1.27016e-10	1.37884e-09
CHM	90.0716	0.493424	0.0767522	6.42879	1.28622e-10	1.39513e-09
AGO4	154.723	-0.335911	0.0522716	-6.42627	1.30775e-10	1.41732e-09
OLFM1	19.5529	-0.949951	0.147927	-6.42177	1.34696e-10	1.45862e-09
AC008708.2	8.32289	-2.77351	0.432078	-6.41901	1.37163e-10	1.48411e-09
FAIM2	79.1665	-0.505321	0.0787346	-6.41803	1.38053e-10	1.49253e-09
STX18	84.7872	0.414784	0.0646518	6.41566	1.40213e-10	1.51465e-09
MRPL22	26.6668	-0.731642	0.11409	-6.41287	1.42808e-10	1.54142e-09
AF127577.2	12.5716	-0.776689	0.12119	-6.40888	1.4659e-10	1.58095e-09
AC091946.1	30.2384	1.24882	0.194972	6.40511	1.50257e-10	1.61918e-09
GPR135	9.08555	-1.22377	0.191069	-6.40485	1.50515e-10	1.62064e-09
ATRX	355.962	-0.239773	0.0374519	-6.40216	1.53198e-10	1.64819e-09
SORL1	95.6188	0.993368	0.155307	6.39617	1.59326e-10	1.71273e-09
SYN1	26.652	-0.717142	0.112208	-6.39118	1.64614e-10	1.76813e-09
MT-CO3	1012.83	-0.71592	0.112044	-6.38965	1.6627e-10	1.78447e-09
AC023906.5	5.42855	1.58093	0.247451	6.38887	1.67115e-10	1.79209e-09
RALY	42.358	-0.667634	0.10451	-6.38821	1.67835e-10	1.79835e-09
SIX3	107.328	0.596344	0.0933681	6.38702	1.69146e-10	1.81093e-09
AC003102.1	14.4611	-0.93236	0.146069	-6.38302	1.73625e-10	1.85738e-09
TPM1	47.9649	0.75072	0.117634	6.38184	1.74971e-10	1.87027e-09
STX19	10.5353	1.41445	0.221723	6.37936	1.77831e-10	1.8993e-09
SCN1A	225.872	1.79476	0.281705	6.37105	1.87733e-10	2.00332e-09
INHA	6.6217	-1.33029	0.208806	-6.37094	1.87872e-10	2.00332e-09
MT-ND5	117.15	-0.827412	0.129892	-6.37002	1.89007e-10	2.01379e-09
SMARCD3	14.9711	-0.907631	0.14256	-6.36668	1.93164e-10	2.05642e-09
AC037487.1	6.00529	-1.35383	0.212873	-6.35977	2.02054e-10	2.14934e-09
STAG1	441.563	0.255758	0.0402369	6.3563	2.0667e-10	2.19668e-09
NBPF3	19.5261	-0.758526	0.119363	-6.3548	2.08696e-10	2.21643e-09
MACC1-AS1	11.2532	-3.52749	0.555213	-6.3534	2.10611e-10	2.23497e-09
GCLC	42.8488	-0.700044	0.11021	-6.35192	2.12648e-10	2.25478e-09
PRKCB	490.002	-0.516901	0.0813896	-6.35094	2.14003e-10	2.26734e-09
MNAT1	207.817	-0.289983	0.0456696	-6.34957	2.15916e-10	2.28577e-09
SLC6A6	235.41	0.49762	0.0783855	6.34837	2.17611e-10	2.30121e-09
ZNF350-AS1	32.5491	-0.587498	0.0925443	-6.34829	2.17722e-10	2.30121e-09
TLNRD1	4.47438	-1.53546	0.2419	-6.34749	2.18859e-10	2.31138e-09
IFITM10	25.1323	-1.26818	0.199884	-6.34458	2.2304e-10	2.35366e-09
CCSER1	828.932	0.333058	0.0525437	6.33869	2.31729e-10	2.44341e-09
DEAF1	48.3693	-0.533434	0.0841635	-6.33807	2.32659e-10	2.45125e-09
AC103876.1	31.2017	-0.657281	0.103733	-6.33628	2.35386e-10	2.47801e-09
EFCAB2	78.7495	0.594723	0.0938857	6.33454	2.38044e-10	2.504e-09
KIF21A	380.702	0.393064	0.0620842	6.33114	2.43357e-10	2.55785e-09
EVL	126.513	-0.370923	0.0586799	-6.32113	2.5965e-10	2.72694e-09
SLC24A1	55.1541	0.745629	0.117966	6.32073	2.60339e-10	2.73201e-09
ACER3	104.729	-0.436333	0.0690943	-6.31503	2.70105e-10	2.83225e-09
USP24	96.5822	-0.485601	0.0769162	-6.31338	2.73009e-10	2.86043e-09
LSM14A	234.498	0.364024	0.0576661	6.31262	2.74351e-10	2.87222e-09
RNPC3	171.615	0.364728	0.0577895	6.31131	2.76675e-10	2.89426e-09
LBR	10.86	-1.12336	0.178107	-6.30721	2.84101e-10	2.9696e-09
CSTF1	8.80279	-1.07106	0.169833	-6.30653	2.85364e-10	2.98045e-09
ACSS3	158.96	0.998858	0.15846	6.30354	2.90918e-10	3.03605e-09
AL138799.4	87.7417	1.16933	0.185694	6.29709	3.03285e-10	3.16262e-09
TMED8	75.9074	-0.481916	0.0765746	-6.29341	3.10557e-10	3.23591e-09
DPYSL2	116.353	-0.456744	0.0725875	-6.29233	3.12742e-10	3.25611e-09
AMBRA1	110.405	-0.353984	0.0562814	-6.28953	3.18423e-10	3.31265e-09
AC025263.1	12.8794	1.49152	0.237284	6.2858	3.26176e-10	3.39064e-09
MATN2	23.0914	-1.01245	0.161086	-6.28519	3.27444e-10	3.40115e-09
ST6GALNAC3	237.571	-1.09947	0.174979	-6.28343	3.31179e-10	3.43703e-09
MPP6	4.35301	-2.28764	0.364082	-6.28332	3.31418e-10	3.43703e-09
AC009126.1	34.317	-0.574584	0.0914723	-6.28151	3.35297e-10	3.47454e-09
CDKN2B-AS1	3.44858	-1.72997	0.275576	-6.27767	3.43692e-10	3.55874e-09
MT-ND3	367.675	-0.78197	0.124611	-6.27531	3.48943e-10	3.61029e-09
CROT	28.0934	-0.697705	0.111244	-6.27187	3.56749e-10	3.68817e-09
RHBDL1	12.6721	-0.876128	0.139806	-6.26676	3.6864e-10	3.80813e-09
FBXL17	539.095	-0.210338	0.0335766	-6.26443	3.74193e-10	3.86248e-09
KCNG3	4.10823	-3.05908	0.488774	-6.25868	3.88257e-10	4.00453e-09
SLC9B2	32.1845	-0.676447	0.108085	-6.25845	3.88822e-10	4.00723e-09
AL139383.1	7.99749	-1.21191	0.193709	-6.25633	3.94142e-10	4.0589e-09
SV2A	64.1339	-0.546334	0.0873535	-6.25429	3.99318e-10	4.10581e-09
AP001783.1	38.8828	-2.93557	0.469369	-6.2543	3.99307e-10	4.10581e-09
OXNAD1	44.834	0.582004	0.0930715	6.2533	4.01873e-10	4.12887e-09
RGS16	123.802	0.929698	0.148718	6.25142	4.06739e-10	4.17562e-09
GPR162	39.6913	-0.693337	0.110926	-6.25045	4.0928e-10	4.19845e-09
LINC02246	7.56929	-1.11338	0.178188	-6.24837	4.14752e-10	4.25129e-09
AL158801.3	13.8963	1.13625	0.182078	6.24049	4.36195e-10	4.46762e-09
FOXO6	7.09354	-2.49775	0.400308	-6.23958	4.38739e-10	4.4902e-09
TXLNG	50.0414	-0.535022	0.0857692	-6.23792	4.43419e-10	4.53459e-09
RIC1	92.1258	-0.440272	0.0706231	-6.2341	4.54387e-10	4.64317e-09
AIFM2	11.1349	-0.95321	0.152923	-6.23329	4.56741e-10	4.66362e-09
LINC01170	21.6907	1.51241	0.242662	6.23257	4.58838e-10	4.68142e-09
CLMN	212.808	-0.695607	0.111626	-6.23158	4.61765e-10	4.70765e-09
CELF5	194.583	-0.539774	0.0866856	-6.2268	4.76044e-10	4.84949e-09
ANO5	67.2008	-0.707436	0.113699	-6.22199	4.90886e-10	4.99685e-09
LINC01646	5.34026	-3.38058	0.543369	-6.22153	4.92331e-10	5.0077e-09
OLFM2	30.8336	-0.83472	0.134214	-6.21932	4.99303e-10	5.07472e-09
CISD1	53.294	-0.553104	0.0890762	-6.20933	5.321e-10	5.4039e-09
GABRA1	160.472	0.527278	0.0849579	6.20635	5.423e-10	5.50326e-09
ZNF638	392.194	-0.205564	0.0331275	-6.20525	5.46086e-10	5.53744e-09
TMEM266	12.8483	-1.02087	0.164631	-6.20098	5.61136e-10	5.68569e-09
RBM25	218.99	-0.287455	0.046387	-6.19689	5.75882e-10	5.83065e-09
SMURF1	209.171	0.557528	0.0899809	6.19607	5.78909e-10	5.85233e-09
MIR9-3HG	4.557	-2.62534	0.423707	-6.19613	5.78695e-10	5.85233e-09
SLC45A4	85.8144	0.524056	0.0846435	6.19134	5.96556e-10	6.02612e-09
SLC2A6	12.6436	-0.931815	0.150533	-6.19012	6.01188e-10	6.06828e-09
SRSF11	216.516	-0.290977	0.0470568	-6.18351	6.26901e-10	6.32301e-09
LINC00535	5.04152	-1.26587	0.204806	-6.18082	6.37688e-10	6.4269e-09
AL590302.2	4.61648	-3.03217	0.49059	-6.18065	6.38378e-10	6.42897e-09
LRIG2	73.3162	-0.370261	0.0599108	-6.18021	6.40173e-10	6.44214e-09
MIR124-2HG	859.848	-0.26669	0.0431641	-6.1785	6.47145e-10	6.50735e-09
CDC14B	50.7232	-0.861083	0.139408	-6.17671	6.54511e-10	6.57642e-09
C12orf76	24.3076	0.770007	0.124699	6.17492	6.61988e-10	6.6465e-09
MT-CYB	597.542	-0.772168	0.125059	-6.17441	6.64127e-10	6.66292e-09
HRH3	5.374	-1.47104	0.238303	-6.17297	6.7021e-10	6.71886e-09
FZD6	19.0489	-1.13343	0.183658	-6.17141	6.76823e-10	6.78001e-09
MLLT1	26.3962	-0.731374	0.118579	-6.16781	6.9244e-10	6.93121e-09
PLXNA4	189.44	-1.44658	0.23463	-6.16535	7.0326e-10	7.0342e-09
MACROD1	23.2985	-0.678939	0.110194	-6.16129	7.21567e-10	7.21185e-09
ZNF124	26.6213	-0.790691	0.128402	-6.15796	7.369e-10	7.35954e-09
BTN3A1	5.36842	-1.27169	0.206547	-6.1569	7.41824e-10	7.40313e-09
AC092567.1	72.8834	0.554116	0.0900023	6.15668	7.42849e-10	7.40778e-09
KHDC1	61.8601	-0.499095	0.081128	-6.15194	7.65401e-10	7.62692e-09
STK32C	12.1164	-0.867728	0.141061	-6.15143	7.67891e-10	7.64598e-09
SND1-IT1	4.79536	-1.29396	0.210503	-6.14698	7.89731e-10	7.85752e-09
TLE4	73.6373	0.884658	0.14395	6.14558	7.96705e-10	7.92096e-09
CNTNAP4	96.5621	-1.72068	0.280154	-6.14189	8.15458e-10	8.10132e-09
AC004969.1	9.42917	1.80295	0.293588	6.14107	8.19668e-10	8.13704e-09
ITGAL	22.3453	1.30032	0.211862	6.13758	8.37888e-10	8.31167e-09
TP53BP2	22.2029	-0.99563	0.162244	-6.13661	8.42995e-10	8.35607e-09
TRANK1	12.0264	-1.32608	0.216107	-6.13624	8.4497e-10	8.36937e-09
AC022679.2	7.4009	-2.46393	0.401601	-6.13526	8.50179e-10	8.41467e-09
INSRR	42.809	-2.20058	0.358691	-6.13504	8.51386e-10	8.42032e-09
MARCKS	84.2669	-0.615549	0.10037	-6.1328	8.63445e-10	8.53321e-09
FAM92A	26.3274	-0.67331	0.109793	-6.13252	8.64956e-10	8.54176e-09
CSPP1	74.4991	-0.428256	0.069869	-6.12942	8.82021e-10	8.70379e-09
PCMTD1	152.897	0.468572	0.0764721	6.12737	8.9344e-10	8.8099e-09
EXOC4	479.03	-0.302664	0.0494683	-6.11834	9.45577e-10	9.31707e-09
SMAP2	64.7077	-0.475379	0.0777221	-6.11639	9.57183e-10	9.42441e-09
HDAC2	42.3147	-0.622557	0.10182	-6.11429	9.69882e-10	9.54234e-09
SMAD7	17.2993	1.32258	0.216322	6.11393	9.72067e-10	9.55673e-09
HELLPAR	35.0442	0.99108	0.162152	6.11204	9.83655e-10	9.66348e-09
AL360091.3	32.2887	-0.81105	0.132744	-6.10988	9.97085e-10	9.78815e-09
ANKS1B	579.914	-0.886126	0.145054	-6.10893	1.00301e-09	9.83897e-09
DMGDH	24.3455	1.13363	0.185732	6.10358	1.03718e-09	1.01667e-08
SYNM	7.77177	-1.54456	0.253083	-6.10298	1.04107e-09	1.01972e-08
GHR	10.2146	-2.46596	0.404324	-6.09896	1.0676e-09	1.04417e-08
C12orf42	5.24745	-2.59367	0.425262	-6.099	1.06736e-09	1.04417e-08
DOCK3	693.614	-0.242318	0.0397393	-6.0977	1.07606e-09	1.05167e-08
MPPE1	40.8031	0.615031	0.100902	6.09531	1.09225e-09	1.06669e-08
ARL6IP1	129.233	-0.49579	0.081381	-6.09221	1.1136e-09	1.08675e-08
SBF2	320.958	-0.24737	0.040622	-6.08955	1.13229e-09	1.10418e-08
AC108134.3	8.87211	-2.53686	0.416984	-6.08383	1.17349e-09	1.1435e-08
PTPRC	5.75466	1.68124	0.276533	6.07972	1.20396e-09	1.17233e-08
SLC41A2	34.788	-0.717661	0.118046	-6.07953	1.20537e-09	1.17284e-08
CCND3	7.07131	-1.19646	0.196884	-6.07699	1.22457e-09	1.19065e-08
MED19	23.2636	-0.691948	0.114013	-6.06901	1.28699e-09	1.25042e-08
YARS	55.6681	0.566493	0.0933558	6.06811	1.29428e-09	1.25658e-08
FAM153A	16.7571	-1.30186	0.214555	-6.06772	1.29738e-09	1.25866e-08
RNF10	77.531	-0.451932	0.0744944	-6.06665	1.30603e-09	1.26613e-08
TMEM132A	18.2252	-1.09748	0.180909	-6.0665	1.30724e-09	1.26638e-08
ZNF609	231.187	0.380558	0.0628063	6.05924	1.36763e-09	1.32391e-08
CHST2	15.8423	1.27159	0.209917	6.05758	1.38181e-09	1.33666e-08
VLDLR	28.7342	-0.68795	0.113679	-6.05171	1.43318e-09	1.38526e-08
MCU	52.5447	0.598706	0.0989335	6.0516	1.43414e-09	1.38526e-08
ST6GAL2	22.5146	1.70001	0.280963	6.05064	1.44272e-09	1.39253e-08
SLC6A16	47.1823	0.836545	0.138365	6.04593	1.48547e-09	1.43274e-08
KCNA1	3.73806	1.92852	0.31909	6.04382	1.50512e-09	1.45063e-08
AC072062.1	3.62689	-2.86065	0.4737	-6.03894	1.55126e-09	1.49402e-08
TTC7B	102.506	-0.451846	0.0748327	-6.03808	1.55958e-09	1.50094e-08
PTEN	417.102	0.31371	0.0520021	6.03264	1.61301e-09	1.55123e-08
ABHD3	36.9804	-1.32077	0.219073	-6.02891	1.65074e-09	1.58637e-08
NEDD4L	6.22888	-1.88469	0.312784	-6.02552	1.68563e-09	1.61872e-08
HERC5	22.68	-2.24134	0.372011	-6.02494	1.6917e-09	1.62337e-08
CYP51A1	61.3758	-0.571987	0.0949559	-6.02372	1.70454e-09	1.6345e-08
AKNA	50.1107	0.622421	0.103345	6.02277	1.71454e-09	1.64291e-08
HSP90AB1	198.526	-0.454758	0.0755311	-6.0208	1.73556e-09	1.66184e-08
NBPF15	21.4105	-0.852244	0.141553	-6.02066	1.73703e-09	1.66204e-08
PWRN4	27.2286	-0.98013	0.162873	-6.01777	1.76835e-09	1.69079e-08
CADM2-AS2	30.537	1.10105	0.183013	6.01626	1.78496e-09	1.70544e-08
CRELD1	42.0492	-0.492233	0.0818395	-6.01461	1.80316e-09	1.72159e-08
CDC40	94.1097	0.475358	0.0790964	6.00985	1.85698e-09	1.77169e-08
PARP8	120.472	-0.44731	0.0744428	-6.00878	1.86925e-09	1.78212e-08
SRRM2	210.5	-0.313865	0.052239	-6.00825	1.87539e-09	1.78668e-08
TRPM3	201.648	1.46324	0.243582	6.00717	1.88792e-09	1.79733e-08
CADM1	2619.17	0.196989	0.0327945	6.00678	1.8924e-09	1.8003e-08
NUP58	90.616	-0.395308	0.0658167	-6.0062	1.8992e-09	1.80547e-08
EPB41L4B	42.1241	-1.22907	0.204677	-6.00495	1.91388e-09	1.81812e-08
CASP6	17.0059	0.996042	0.165891	6.00418	1.92297e-09	1.82544e-08
AC063980.1	104.143	1.8716	0.311773	6.00307	1.93624e-09	1.83672e-08
PDE6A	80.4072	-1.431	0.238427	-6.00186	1.95072e-09	1.84913e-08
TFAP2E	71.5665	-0.522075	0.0871301	-5.9919	2.07398e-09	1.96457e-08
TMEM161B-AS1	298.226	0.323264	0.0540113	5.98512	2.16227e-09	2.04673e-08
NPTXR	10.5713	-1.1901	0.19888	-5.984	2.17726e-09	2.05945e-08
PIK3R3	156.095	-0.501846	0.083938	-5.97877	2.24835e-09	2.12517e-08
ZNF730	24.8839	-0.680503	0.113886	-5.97531	2.29647e-09	2.16911e-08
YEATS2	176.254	0.333548	0.0558233	5.97507	2.29996e-09	2.17085e-08
FYCO1	53.7325	0.607768	0.101782	5.9713	2.35376e-09	2.22005e-08
ARID1B	512.754	0.239303	0.0400879	5.96946	2.38038e-09	2.24356e-08
LINC00381	1.86343	-3.10083	0.519519	-5.96866	2.39206e-09	2.25296e-08
PEG3	16.7065	-0.84636	0.141804	-5.96851	2.39425e-09	2.25342e-08
MEIS3	5.67449	-1.57419	0.264101	-5.96054	2.51404e-09	2.36448e-08
KIAA1109	276.174	0.305392	0.0512801	5.95536	2.59503e-09	2.43892e-08
TLK1	159.682	-0.751504	0.126194	-5.95514	2.5985e-09	2.44045e-08
AC010307.2	6.39703	-1.71952	0.288788	-5.95426	2.61257e-09	2.45193e-08
STAM	48.6693	-0.57971	0.0974014	-5.95176	2.65272e-09	2.48784e-08
B4GALNT4	24.0705	-0.745906	0.125473	-5.94473	2.76909e-09	2.59514e-08
SMOC2	17.1074	-1.88804	0.317836	-5.9403	2.84504e-09	2.66443e-08
GALNT13	513.607	0.892247	0.150273	5.93749	2.89422e-09	2.70857e-08
SLC25A13	207.931	0.301558	0.0508119	5.93478	2.94233e-09	2.74835e-08
DNAH10	9.2214	-0.903116	0.152169	-5.93497	2.939e-09	2.74835e-08
AC008554.1	16.3124	-0.877771	0.147904	-5.93475	2.94295e-09	2.74835e-08
DANCR	20.5691	-0.911622	0.153617	-5.93437	2.94968e-09	2.75269e-08
CHRM5	35.3243	1.24554	0.209935	5.93299	2.97468e-09	2.77406e-08
ZDBF2	78.9429	-0.488943	0.0824147	-5.93272	2.97958e-09	2.77668e-08
KCNMB2	82.1424	1.09135	0.18402	5.93061	3.01813e-09	2.81062e-08
ARHGEF3	54.3468	-0.532444	0.0897902	-5.92987	3.03182e-09	2.82138e-08
MT-ATP6	1197.84	-0.685063	0.115535	-5.92951	3.03842e-09	2.82554e-08
SMARCA4	91.9033	-0.372837	0.0629024	-5.92722	3.08102e-09	2.86314e-08
NMT2	55.7798	0.617733	0.104261	5.92486	3.12556e-09	2.9025e-08
GIGYF1	40.3587	-0.500907	0.0845515	-5.92428	3.13662e-09	2.91072e-08
CABP2	36.0769	0.887683	0.149928	5.92074	3.20493e-09	2.97203e-08
SLC26A4	21.2179	-1.02738	0.173535	-5.9203	3.21353e-09	2.97792e-08
CCNJL	11.0567	-1.51335	0.255888	-5.91411	3.33674e-09	3.08993e-08
AC068481.1	5.88382	-1.57975	0.267146	-5.91343	3.35063e-09	3.10062e-08
DACT3	8.59288	-0.943074	0.159489	-5.9131	3.35738e-09	3.1047e-08
FNBP1L	70.692	0.603003	0.102031	5.91001	3.42084e-09	3.16117e-08
AL133227.1	16.8136	-0.721891	0.122253	-5.90491	3.52843e-09	3.25832e-08
PBX3	19.6244	-1.23522	0.209313	-5.90131	3.60622e-09	3.32783e-08
AL033504.1	262.37	2.30784	0.391314	5.89766	3.68701e-09	3.40001e-08
ABLIM2	60.2747	0.672777	0.114089	5.89696	3.70261e-09	3.41202e-08
IRF9	10.2923	-1.07832	0.182865	-5.89682	3.70581e-09	3.4126e-08
ILF3	92.4512	-0.398805	0.0676408	-5.89592	3.72592e-09	3.42873e-08
ZBTB20	1123.77	0.205673	0.0349029	5.89273	3.79877e-09	3.49333e-08
TMEM145	87.0037	-0.413244	0.0701587	-5.89014	3.85874e-09	3.54602e-08
RARB	46.5625	0.850873	0.144572	5.88547	3.96923e-09	3.64502e-08
LRRC63	9.42603	1.43077	0.243113	5.88523	3.97502e-09	3.64781e-08
PINLYP	11.5519	-0.836539	0.142176	-5.88384	4.00847e-09	3.67596e-08
AARS	46.794	0.56259	0.0956219	5.88349	4.01713e-09	3.68135e-08
NDUFB9	44.0931	-0.579532	0.0985112	-5.88291	4.03111e-09	3.6916e-08
AL353784.1	28.7284	-1.77687	0.302179	-5.88021	4.09748e-09	3.74979e-08
AC035140.1	7.18175	-1.22096	0.207657	-5.87969	4.1103e-09	3.75892e-08
PITPNA	55.7831	-0.598584	0.101808	-5.87953	4.11431e-09	3.75999e-08
DOK6	2241.96	0.255956	0.0436105	5.86913	4.3808e-09	4.00076e-08
TBL1X	30.3421	1.84367	0.314319	5.8656	4.47518e-09	4.08414e-08
RABL6	70.7136	-0.442178	0.0754166	-5.86314	4.5419e-09	4.14217e-08
DLGAP3	15.1134	-1.09385	0.186575	-5.86279	4.55158e-09	4.14815e-08
TAPBP	32.3223	-0.611503	0.104356	-5.85975	4.63561e-09	4.22182e-08
C9orf16	35.2903	0.999105	0.170535	5.85866	4.66609e-09	4.24666e-08
HDDC2	28.6255	-0.770524	0.131617	-5.85428	4.79079e-09	4.35715e-08
TMEM245	91.7466	-0.391008	0.0667987	-5.85352	4.81269e-09	4.37406e-08
DNM2	107.416	-0.372224	0.0636201	-5.85074	4.89393e-09	4.44484e-08
IFT81	65.0966	-0.43725	0.0747368	-5.85053	4.90002e-09	4.44732e-08
MT-ND1	381.607	-0.695179	0.118838	-5.84978	4.92234e-09	4.46451e-08
AP001972.3	43.0017	-1.92756	0.329701	-5.84641	5.02294e-09	4.55264e-08
GEM	19.832	-1.13431	0.194106	-5.84377	5.10325e-09	4.62226e-08
MAPT	441.449	0.278273	0.0476712	5.83733	5.30455e-09	4.80131e-08
CYP4V2	101.236	-0.369961	0.0634211	-5.83342	5.43042e-09	4.91188e-08
OXCT1	41.1016	-0.5635	0.0966466	-5.83051	5.52567e-09	4.99462e-08
CD46	110.587	-0.357332	0.0613267	-5.8267	5.65337e-09	5.10655e-08
DPP10	691.402	-1.87551	0.321961	-5.82528	5.70175e-09	5.14675e-08
GALNT17	33.5855	-1.06936	0.183649	-5.82285	5.78508e-09	5.2184e-08
ZNF462	190.88	-0.343171	0.0590016	-5.8163	6.01655e-09	5.4235e-08
AP001372.2	12.7083	-0.94032	0.161806	-5.81139	6.19549e-09	5.581e-08
ANKRD36B	110.221	-0.34076	0.0586894	-5.80616	6.39214e-09	5.75423e-08
KIRREL2	64.0782	-0.611995	0.105438	-5.80433	6.46226e-09	5.8134e-08
FAM234B	45.9127	-0.813612	0.140214	-5.80264	6.52779e-09	5.86836e-08
ZC3H12B	44.6293	-0.5591	0.0963601	-5.8022	6.5451e-09	5.87992e-08
SPAG9	201.669	0.286495	0.0494085	5.7985	6.69118e-09	6.00708e-08
PSIP1	224.832	-0.27292	0.0470975	-5.7948	6.84044e-09	6.13692e-08
UACA	25.9446	0.989865	0.170891	5.79239	6.9391e-09	6.22122e-08
CYP2R1	14.1019	-0.744777	0.128598	-5.79154	6.97459e-09	6.24879e-08
HLA-A	28.2535	-0.960549	0.165993	-5.78667	7.17937e-09	6.42791e-08
DTWD1	83.0361	-0.397369	0.0686823	-5.78561	7.22486e-09	6.46427e-08
THSD4	54.6419	-1.2622	0.218201	-5.7846	7.26831e-09	6.49876e-08
MYCBP2-AS1	66.9832	-0.458776	0.0793143	-5.78428	7.28225e-09	6.50682e-08
CEACAM16	1.77801	-2.51824	0.435501	-5.78239	7.36456e-09	6.57593e-08
SERINC5	20.4283	-0.723079	0.125101	-5.77995	7.47235e-09	6.66767e-08
NAA35	107.315	-0.351878	0.0609086	-5.77714	7.59807e-09	6.77529e-08
CCNYL1	26.5502	0.908073	0.157209	5.7762	7.64058e-09	6.8086e-08
MT-CO2	437.545	-0.736826	0.127575	-5.77564	7.66614e-09	6.82678e-08
AC017101.1	133.047	-0.460449	0.0797522	-5.7735	7.764e-09	6.90929e-08
DHDDS	42.228	-0.492909	0.085413	-5.77089	7.88517e-09	7.0124e-08
BRWD3	151.522	-0.30068	0.0521183	-5.76918	7.96588e-09	7.07942e-08
MKNK1	24.3005	0.69917	0.121217	5.76794	8.02445e-09	7.12668e-08
RNF141	15.2973	-0.858986	0.149002	-5.76493	8.16925e-09	7.25041e-08
LINC01364	6.65598	-2.23065	0.387061	-5.76304	8.261e-09	7.32693e-08
ZNF30	34.0942	-0.612441	0.106287	-5.76213	8.30596e-09	7.36188e-08
FAM151B	16.0717	-0.741305	0.128662	-5.76163	8.33047e-09	7.37865e-08
TBC1D24	29.9546	-0.608526	0.105619	-5.7615	8.33711e-09	7.3796e-08
SLC50A1	4.58628	-1.19149	0.206824	-5.76087	8.3683e-09	7.40225e-08
INTS6	111.507	0.393176	0.0682876	5.75765	8.52949e-09	7.53979e-08
EPM2A	79.2333	-0.46457	0.0807376	-5.75408	8.71149e-09	7.69554e-08
NCK1	37.7347	-0.628257	0.109223	-5.75206	8.81641e-09	7.78302e-08
ELAVL3	7.61678	-1.10246	0.19174	-5.74978	8.93622e-09	7.88353e-08
SYTL2	33.6617	-0.679655	0.118214	-5.74936	8.95793e-09	7.89742e-08
RPS19	111.182	-0.523043	0.0909796	-5.74902	8.97645e-09	7.90848e-08
GABBR1	35.0245	-0.607039	0.105646	-5.74596	9.14027e-09	8.04745e-08
CCDC93	104.041	0.46614	0.0811723	5.7426	9.32355e-09	8.20336e-08
LMCD1-AS1	284.8	0.341413	0.0594578	5.74211	9.35052e-09	8.22162e-08
PPM1K	83.7713	-0.489858	0.085362	-5.7386	9.54622e-09	8.38813e-08
SLC38A3	61.7428	0.810325	0.141273	5.73589	9.70042e-09	8.51796e-08
FIGN	105.659	0.781032	0.136198	5.73452	9.77876e-09	8.58105e-08
NEPRO	26.4593	-0.662253	0.115552	-5.7312	9.97201e-09	8.74483e-08
FOCAD	116.52	0.436032	0.0760838	5.73094	9.98741e-09	8.75254e-08
SRSF10	135.394	-0.360962	0.0630194	-5.7278	1.01743e-08	8.91042e-08
AC064874.1	6.374	-1.5345	0.268137	-5.72283	1.04763e-08	9.16884e-08
AL450384.2	126.431	0.479107	0.0837208	5.72268	1.04858e-08	9.17108e-08
AL161629.1	3.44177	-2.60526	0.455703	-5.71702	1.0841e-08	9.47547e-08
TTC9B	24.3666	-0.773896	0.135383	-5.71635	1.08837e-08	9.5065e-08
SHTN1	151.887	0.375566	0.0657741	5.70994	1.13014e-08	9.86487e-08
RBM4	99.7964	-0.392445	0.0687418	-5.70897	1.13662e-08	9.91488e-08
MAGI3	810.547	-0.258006	0.0452086	-5.70702	1.14975e-08	1.00185e-07
DDX21	22.716	-0.718498	0.125898	-5.70698	1.15001e-08	1.00185e-07
HLA-C	52.8412	-0.810541	0.142048	-5.70609	1.15599e-08	1.00639e-07
PRUNE2	351.665	0.263691	0.0462357	5.7032	1.17581e-08	1.02244e-07
GSG1L2	14.6562	-2.59567	0.455128	-5.70317	1.17597e-08	1.02244e-07
KDM8	6.45547	-1.14144	0.200345	-5.69739	1.21653e-08	1.05701e-07
GPR180	37.1581	-0.567382	0.0996393	-5.69436	1.23835e-08	1.07527e-07
SPTAN1	426.082	-0.246261	0.0432596	-5.69262	1.25102e-08	1.08556e-07
AC011447.3	9.74494	-0.909697	0.159921	-5.68841	1.2823e-08	1.11197e-07
AP001347.1	56.3932	-0.524758	0.0922586	-5.68791	1.28605e-08	1.1145e-07
Z99758.1	4.66368	-1.08783	0.191335	-5.68546	1.30464e-08	1.12986e-07
MRPS25	69.0259	-0.40932	0.0721543	-5.67285	1.40442e-08	1.21548e-07
JPH3	34.9334	-0.548027	0.096623	-5.67181	1.41299e-08	1.2221e-07
PRRT1	22.7288	-0.840995	0.148351	-5.66896	1.4367e-08	1.2418e-07
ARHGAP12	52.8239	0.734743	0.129619	5.66848	1.44069e-08	1.24443e-07
NAPRT	5.55559	-1.17854	0.207943	-5.66761	1.448e-08	1.24992e-07
TTC9C	27.3761	-0.573761	0.101271	-5.6656	1.46515e-08	1.26391e-07
FOXD1	8.60959	1.22814	0.216801	5.66482	1.47178e-08	1.2688e-07
HFM1	52.8635	-0.631738	0.111611	-5.66016	1.51235e-08	1.30292e-07
H3F3A	160.873	-0.442553	0.0782198	-5.65782	1.53311e-08	1.31936e-07
ADAMTS19	5.59579	-2.68711	0.47494	-5.65778	1.53342e-08	1.31936e-07
AC025171.1	10.6695	-0.914195	0.161652	-5.65533	1.55551e-08	1.3375e-07
BCL2	5.81802	-1.60865	0.284518	-5.65393	1.5682e-08	1.34753e-07
TEAD3	11.9732	-1.24665	0.220691	-5.64885	1.61529e-08	1.38709e-07
CEP63	92.6195	-0.366393	0.0648704	-5.64808	1.62254e-08	1.39241e-07
BABAM2	218.771	0.293805	0.0520248	5.64741	1.62885e-08	1.39693e-07
IGFBP5	13.6641	1.58859	0.281394	5.64543	1.64771e-08	1.41219e-07
RASSF8	104.056	0.677289	0.120005	5.64385	1.66289e-08	1.42427e-07
RAB6A	139.904	0.330073	0.0584892	5.64331	1.66811e-08	1.42782e-07
HABP4	32.9939	-0.571808	0.101352	-5.64181	1.6827e-08	1.4391e-07
RHBDL3	126.745	-0.636927	0.112896	-5.64173	1.68347e-08	1.4391e-07
AL365356.1	28.0202	0.687568	0.121913	5.63985	1.70202e-08	1.45403e-07
ARNT2	58.3633	-0.484873	0.086032	-5.63596	1.74085e-08	1.48623e-07
CTNND1	90.6309	0.367928	0.0653057	5.63393	1.76144e-08	1.50284e-07
ZNF540	109.319	-0.339368	0.0602824	-5.62963	1.80592e-08	1.5398e-07
AP001462.1	11.4075	-0.840229	0.149277	-5.62864	1.81633e-08	1.54768e-07
APBA2	47.2667	-0.718101	0.127601	-5.62771	1.82619e-08	1.55508e-07
JPX	308.772	-0.230592	0.0409882	-5.62582	1.8463e-08	1.5712e-07
PICALM	212.595	0.296646	0.0527323	5.62551	1.84965e-08	1.57304e-07
IDI1	45.5967	-0.640393	0.113888	-5.62302	1.8765e-08	1.59382e-07
EPB41L3	429.309	0.359603	0.0639517	5.62304	1.87631e-08	1.59382e-07
NBDY	45.3979	-0.548632	0.0976272	-5.61967	1.91325e-08	1.624e-07
INPP5F	45.1963	-0.554003	0.098647	-5.61602	1.9541e-08	1.65761e-07
ARRB1	6.34291	-1.16982	0.20832	-5.61551	1.95981e-08	1.66138e-07
SOBP	206.021	0.316501	0.0563702	5.61468	1.96924e-08	1.66831e-07
SCD	7.29108	-1.31545	0.234305	-5.61425	1.97422e-08	1.67146e-07
LINC01749	12.539	-2.30133	0.410113	-5.61145	2.00642e-08	1.69763e-07
MGAT5	237.215	-0.419152	0.0747049	-5.61077	2.01429e-08	1.7032e-07
TUBGCP3	71.7329	-0.379133	0.0675823	-5.60995	2.02382e-08	1.71017e-07
ZDHHC1	6.95279	-1.04526	0.186406	-5.60744	2.05339e-08	1.73405e-07
NTSR1	15.9255	1.79353	0.319928	5.60605	2.06997e-08	1.74693e-07
ESR2	10.1339	-1.16786	0.208329	-5.60586	2.07227e-08	1.74776e-07
HECW1	244.759	0.691399	0.123348	5.60525	2.07958e-08	1.75281e-07
ZNF737	30.2729	-0.640603	0.114295	-5.60483	2.08454e-08	1.75587e-07
ARFGEF1	205.464	0.313697	0.0559839	5.60334	2.10263e-08	1.76998e-07
HEYL	2.15424	-2.75922	0.492834	-5.59868	2.15993e-08	1.8159e-07
USP44	15.4408	-0.923723	0.164988	-5.59872	2.15938e-08	1.8159e-07
BBS5	53.3723	-0.434918	0.0776895	-5.59816	2.16645e-08	1.82023e-07
MIR4435-2HG	14.9855	-0.966808	0.172751	-5.59655	2.18661e-08	1.836e-07
PEAK1	185.08	-0.325556	0.0582385	-5.59005	2.27006e-08	1.90487e-07
FAM168A	164.909	0.381303	0.0682509	5.58678	2.31315e-08	1.93979e-07
KHDRBS3	486.75	-0.439869	0.0787653	-5.58456	2.34296e-08	1.96354e-07
HLA-F	6.27083	-1.35707	0.243027	-5.58404	2.34992e-08	1.96813e-07
RAB9B	17.2812	-0.807148	0.144602	-5.58185	2.37975e-08	1.99186e-07
BSPH1	47.7505	-2.20668	0.395358	-5.58148	2.38482e-08	1.99484e-07
TACC1	38.3856	-0.587253	0.105228	-5.58079	2.39434e-08	2.00154e-07
PER1	92.2507	0.588371	0.105444	5.57993	2.40617e-08	2.01015e-07
SLC36A1	6.51997	1.25389	0.224723	5.57971	2.40916e-08	2.01138e-07
CERK	34.1756	-0.639093	0.114553	-5.57902	2.41878e-08	2.01814e-07
RNF180	80.7795	-0.400711	0.0718501	-5.57704	2.44643e-08	2.03993e-07
AC023906.4	44.6011	0.648595	0.116301	5.57688	2.44864e-08	2.04048e-07
ST7-AS2	87.7889	0.713954	0.128095	5.57364	2.4947e-08	2.07756e-07
PNPLA7	30.4073	-0.70876	0.127181	-5.57286	2.50593e-08	2.0847e-07
PAK5	54.9549	0.541549	0.0971768	5.57282	2.50643e-08	2.0847e-07
AC110015.1	4.41293	-2.03235	0.364699	-5.57267	2.50862e-08	2.08521e-07
CCDC144A	83.3359	-0.633291	0.11365	-5.57231	2.51384e-08	2.08824e-07
AL589642.1	14.7259	1.50366	0.269867	5.57184	2.52057e-08	2.09251e-07
TLE2	59.1283	-0.46903	0.0842054	-5.57007	2.54631e-08	2.11256e-07
AL353803.1	12.4961	1.02225	0.183724	5.56402	2.63631e-08	2.18586e-07
FYTTD1	35.5664	-0.567303	0.101992	-5.56225	2.66322e-08	2.20679e-07
IPO8	44.4321	0.68468	0.123159	5.55932	2.70824e-08	2.24268e-07
AC128707.1	4.29048	-2.88005	0.518116	-5.5587	2.71793e-08	2.24931e-07
RPL13	269.617	-0.383708	0.0690297	-5.55859	2.71966e-08	2.24933e-07
ATP6AP1	49.9325	-0.541449	0.0975332	-5.55143	2.83344e-08	2.34197e-07
TRIM8	66.9862	-0.469782	0.0846392	-5.55041	2.84999e-08	2.35418e-07
HPN-AS1	11.3972	-2.18155	0.39337	-5.54579	2.92627e-08	2.41567e-07
SLC25A36	97.7049	-0.393669	0.0709972	-5.54486	2.94189e-08	2.42593e-07
CA3	7.92275	-0.965434	0.174121	-5.54462	2.94602e-08	2.42593e-07
DDX24	117.258	-0.383786	0.0692165	-5.54472	2.94431e-08	2.42593e-07
ACLY	18.3592	-0.754526	0.136077	-5.54483	2.94242e-08	2.42593e-07
PARM1	28.4274	-1.5149	0.273323	-5.54254	2.98112e-08	2.45331e-07
CADPS2	26.3888	-2.42014	0.437004	-5.53802	3.05918e-08	2.51598e-07
SLC38A1	517.403	0.300709	0.0543097	5.53692	3.07842e-08	2.53023e-07
MIR548XHG	64.1491	-2.85375	0.515498	-5.53591	3.09608e-08	2.54317e-07
SMC3	90.9608	-0.428124	0.0773408	-5.53555	3.10253e-08	2.54689e-07
AL139022.1	15.9542	0.903628	0.163251	5.53522	3.10841e-08	2.54855e-07
FAM214A	69.0423	0.49084	0.0886751	5.53526	3.10772e-08	2.54855e-07
RNMT	189.723	-0.296288	0.05354	-5.53396	3.13084e-08	2.56535e-07
RPL18	148.351	-0.418109	0.0755976	-5.53071	3.18931e-08	2.61164e-07
SLC12A5	177.923	-0.299852	0.0542334	-5.52893	3.22199e-08	2.63677e-07
ZNF69	5.80454	-1.2047	0.217924	-5.52808	3.2376e-08	2.64791e-07
ASPHD2	18.1591	-0.922486	0.166883	-5.52774	3.24389e-08	2.65141e-07
NARS2	71.9533	-0.368114	0.066612	-5.52623	3.27177e-08	2.67255e-07
WHRN	4.67557	-2.14467	0.388166	-5.52513	3.29235e-08	2.68771e-07
PAQR9-AS1	18.2118	1.19422	0.216178	5.52427	3.30862e-08	2.69932e-07
INPP5K	13.8436	-0.723687	0.131018	-5.52357	3.32182e-08	2.70842e-07
PPP1R13B	170.11	-0.284697	0.0515545	-5.52224	3.34697e-08	2.72725e-07
SAMD5	301.066	1.8957	0.343541	5.5181	3.42677e-08	2.79055e-07
ARMCX5-GPRASP2	57.0097	-0.462333	0.0838127	-5.51626	3.46288e-08	2.81822e-07
ZNF131	100.988	-0.340698	0.0618045	-5.51251	3.53749e-08	2.87717e-07
AC010275.1	30.2935	-0.778426	0.141224	-5.51198	3.5482e-08	2.88411e-07
RHBDD2	26.9668	-0.581761	0.105563	-5.51101	3.56788e-08	2.89832e-07
GLDN	8.51336	-2.45173	0.445409	-5.50445	3.70327e-08	3.00646e-07
CYFIP2	162.777	-0.27601	0.0501765	-5.50078	3.7811e-08	3.06776e-07
TMCC1	236.01	0.275507	0.0500961	5.49956	3.80737e-08	3.08719e-07
NAV2	5.89142	-2.80466	0.510259	-5.49654	3.87311e-08	3.13857e-07
KIF27	18.4108	-0.678754	0.123698	-5.4872	4.0835e-08	3.30703e-07
ANAPC5	85.9958	-0.357207	0.065105	-5.48663	4.09685e-08	3.31581e-07
ACOT7	44.5288	-0.581354	0.106007	-5.48409	4.15598e-08	3.36162e-07
ABCA12	7.48924	-2.69341	0.491304	-5.48217	4.20151e-08	3.39637e-07
SYK	25.2536	-2.81667	0.51388	-5.48117	4.22525e-08	3.41347e-07
SCN8A	173.744	-0.264402	0.0482722	-5.47732	4.31808e-08	3.48634e-07
PNPLA2	19.606	-0.797336	0.145617	-5.47558	4.36085e-08	3.51863e-07
PLCB1	45.79	-1.25141	0.228548	-5.47548	4.36339e-08	3.51863e-07
PTPN4	222.737	0.2773	0.0506465	5.4752	4.3702e-08	3.52198e-07
ADCY2	198.643	1.45476	0.265797	5.47319	4.41996e-08	3.55991e-07
NRXN2	39.8403	-0.597932	0.109257	-5.47273	4.43167e-08	3.56717e-07
NPEPPS	335.667	0.229616	0.0419621	5.472	4.44989e-08	3.57966e-07
AC011990.1	39.0522	-2.58655	0.472976	-5.46867	4.53432e-08	3.64536e-07
GTPBP8	11.5387	-0.83679	0.153119	-5.46498	4.62968e-08	3.71976e-07
SLF1	69.4125	-0.364105	0.0666317	-5.46444	4.6438e-08	3.72885e-07
AC010307.3	4.89414	-1.68516	0.308569	-5.46121	4.72902e-08	3.79497e-07
ZNF248	238.451	-0.277234	0.0507675	-5.46086	4.73842e-08	3.80021e-07
C11orf49	202.049	0.288939	0.0529563	5.45618	4.86474e-08	3.89916e-07
AC006504.2	3.91186	-1.73592	0.318172	-5.45591	4.87234e-08	3.90288e-07
ACSL6	69.4894	-0.459775	0.0843119	-5.45326	4.94534e-08	3.95896e-07
PJA2	136.837	-0.341373	0.0626051	-5.4528	4.95824e-08	3.96689e-07
AC007098.1	91.4583	0.435874	0.0799629	5.45095	5.01001e-08	4.00589e-07
RNPS1	71.1156	-0.412744	0.0757856	-5.4462	5.1456e-08	4.11182e-07
NPTN	321.371	0.25847	0.0474675	5.44519	5.17492e-08	4.13275e-07
TSPAN2	5.09692	-2.88106	0.529367	-5.44247	5.25481e-08	4.19402e-07
NLK	759.016	0.217	0.0398763	5.44183	5.27351e-08	4.20641e-07
HPCAL4	17.7101	-1.09822	0.201887	-5.43981	5.3338e-08	4.25194e-07
AZIN2	22.8946	-0.653393	0.120118	-5.4396	5.34008e-08	4.25438e-07
DSEL	7.89117	1.53419	0.282085	5.43876	5.36512e-08	4.27176e-07
PGM2L1	6.32498	-1.20093	0.220874	-5.43715	5.41391e-08	4.30801e-07
SLC35E2B	27.0791	-0.606978	0.111647	-5.4366	5.43071e-08	4.31669e-07
KIFC2	8.54077	-0.920196	0.16926	-5.43658	5.43134e-08	4.31669e-07
KIRREL3-AS1	14.6406	-2.28376	0.420127	-5.43588	5.45275e-08	4.33111e-07
LYPD5	16.4093	-0.725937	0.133622	-5.43277	5.54848e-08	4.4045e-07
NDUFAF8	25.6531	-0.59436	0.109448	-5.43054	5.61853e-08	4.45744e-07
AC060834.2	15.1143	-2.61957	0.482555	-5.42854	5.68178e-08	4.50222e-07
SLC7A8	16.8157	0.915335	0.168613	5.4286	5.67964e-08	4.50222e-07
LRRC17	8.09998	1.16095	0.214194	5.42009	5.9568e-08	4.71731e-07
SUPT16H	48.0744	-0.488269	0.0901093	-5.41863	6.00563e-08	4.7503e-07
TDRD9	45.548	0.719217	0.132728	5.41872	6.00263e-08	4.7503e-07
SRM	19.2808	-0.719079	0.132717	-5.41813	6.02239e-08	4.76071e-07
KIAA1324L	74.9773	-0.461886	0.0852546	-5.41773	6.03597e-08	4.76859e-07
GACAT2	13.0928	-0.846284	0.156275	-5.41534	6.11731e-08	4.82997e-07
COL27A1	8.16815	-1.71172	0.316131	-5.4146	6.14273e-08	4.84715e-07
SSBP4	18.5566	-0.75653	0.139849	-5.40964	6.31512e-08	4.98022e-07
ZNF439	45.3449	-0.45688	0.0844989	-5.40694	6.41118e-08	5.05296e-07
CEP162	32.7142	-0.590006	0.109135	-5.40619	6.43808e-08	5.07114e-07
TMEM179	88.9077	-0.653118	0.120837	-5.40493	6.48322e-08	5.10365e-07
LINC00290	32.7766	0.963995	0.178417	5.40303	6.55236e-08	5.15501e-07
EVA1C	45.5768	-0.516689	0.0956352	-5.40271	6.56426e-08	5.16131e-07
PRKCA	697.437	-1.25881	0.233118	-5.39986	6.66948e-08	5.24093e-07
AHDC1	48.3164	-0.545574	0.101047	-5.39921	6.69368e-08	5.25682e-07
CLASP2	776.02	-0.173651	0.0321981	-5.3932	6.92137e-08	5.43241e-07
CHD3	42.6774	-0.543044	0.100735	-5.39082	7.01373e-08	5.50164e-07
TRABD2A	3.58182	-1.6964	0.31469	-5.3907	7.01837e-08	5.50202e-07
MROH9	9.97785	-3.33188	0.618575	-5.38638	7.18916e-08	5.63258e-07
PIGC	28.7228	0.70754	0.131361	5.38622	7.19548e-08	5.63419e-07
ATG5	59.2971	0.532569	0.098893	5.3853	7.23227e-08	5.65964e-07
GRB2	53.0184	-0.429131	0.07973	-5.3823	7.35417e-08	5.75164e-07
BRCA1	29.701	0.724062	0.134631	5.37812	7.52686e-08	5.88322e-07
SH3BP4	2.51595	-2.65338	0.493722	-5.37423	7.69122e-08	6.0046e-07
TARS	38.748	0.615792	0.114581	5.3743	7.68816e-08	6.0046e-07
PPFIA2	859.936	-0.218544	0.0406688	-5.37376	7.71136e-08	6.01677e-07
SFI1	104.838	0.350245	0.0651916	5.37255	7.76303e-08	6.05351e-07
TARS2	22.901	-0.572981	0.10668	-5.37101	7.82978e-08	6.10197e-07
TRIM7	7.06712	-1.03606	0.192952	-5.3695	7.89547e-08	6.14954e-07
ATXN10	140.272	-0.296604	0.0552452	-5.36887	7.92313e-08	6.16746e-07
RDX	149.823	-0.328452	0.0611792	-5.36869	7.93086e-08	6.16985e-07
AEBP2	125.555	0.358853	0.0668512	5.36793	7.96454e-08	6.1924e-07
AC004158.1	6.38237	1.39756	0.26048	5.36533	8.07993e-08	6.27843e-07
BAALC-AS1	5.10626	-1.40247	0.261401	-5.36521	8.08549e-08	6.27907e-07
CAND2	23.8086	-0.566614	0.105639	-5.3637	8.15328e-08	6.32799e-07
SETBP1	143.363	-0.507609	0.0946435	-5.36337	8.16817e-08	6.33583e-07
AC100800.1	7.8692	-0.962003	0.179412	-5.36199	8.23119e-08	6.38098e-07
COPA	81.9256	-0.370008	0.0690168	-5.36112	8.27053e-08	6.40772e-07
VWA5A	6.83898	-1.4376	0.268267	-5.35883	8.37613e-08	6.48292e-07
PARD6G	4.22812	-1.28899	0.240537	-5.35881	8.37738e-08	6.48292e-07
SNX27	77.7505	-0.357739	0.0667786	-5.35709	8.45708e-08	6.54077e-07
PRNP	103.785	0.483663	0.090295	5.35647	8.48636e-08	6.55958e-07
NMD3	176.446	-0.320744	0.0598895	-5.35559	8.52791e-08	6.58785e-07
FANCC	105.547	-0.447959	0.0836471	-5.35534	8.53955e-08	6.59299e-07
ASCL1	4.54607	-2.2499	0.420382	-5.35204	8.69669e-08	6.7104e-07
AC120498.3	53.5832	-0.794651	0.148491	-5.35152	8.72169e-08	6.72576e-07
GLP2R	7.62882	-3.06823	0.573697	-5.34817	8.88462e-08	6.84742e-07
EPC2	78.5925	-0.439321	0.0821533	-5.34758	8.91398e-08	6.86605e-07
LMTK3	35.7218	-0.494384	0.0924589	-5.34706	8.93939e-08	6.88161e-07
DNAH14	168.946	-0.855255	0.159992	-5.34561	9.0114e-08	6.93302e-07
STAT5B	80.1229	-0.409294	0.0765976	-5.34343	9.12019e-08	7.01264e-07
DNAAF4	14.8669	-0.889177	0.166436	-5.34247	9.16886e-08	7.04597e-07
MTX2	104.3	-0.331107	0.0619819	-5.342	9.1928e-08	7.06026e-07
UNC79	517.579	0.263929	0.0494115	5.34145	9.22054e-08	7.07746e-07
STEAP2-AS1	13.2299	1.26718	0.237262	5.34084	9.25194e-08	7.09744e-07
PGP	86.1447	-0.383478	0.0718299	-5.33869	9.36202e-08	7.17773e-07
GLIPR1L2	17.8398	-0.704356	0.132015	-5.33543	9.53205e-08	7.30386e-07
PPP2R1A	55.9302	-0.476704	0.0893552	-5.33493	9.55801e-08	7.31951e-07
C17orf100	6.43185	-1.26315	0.237018	-5.32934	9.85691e-08	7.53968e-07
UNC119	239.907	0.366169	0.0687078	5.32937	9.85552e-08	7.53968e-07
ARID4A	129.094	-0.325771	0.0611701	-5.32566	1.00586e-07	7.68948e-07
ALG8	29.5004	-0.565748	0.106238	-5.32528	1.00796e-07	7.70114e-07
ACAD11	60.5213	-0.397353	0.0746178	-5.32517	1.00856e-07	7.70126e-07
MT-ND2	189.904	-0.699881	0.13145	-5.32429	1.01347e-07	7.73432e-07
AL031280.1	12.3133	-0.869569	0.16336	-5.32304	1.0205e-07	7.78343e-07
TRAPPC12	76.655	-0.337299	0.0633961	-5.32049	1.03486e-07	7.8884e-07
SMIM18	7.68703	-1.23122	0.231443	-5.31978	1.03892e-07	7.91481e-07
RPS29	118.374	-0.448684	0.0844018	-5.31605	1.06042e-07	8.07399e-07
MYPOP	15.7018	-0.750613	0.141238	-5.31453	1.06933e-07	8.13714e-07
RGS7	672.249	0.390547	0.0735046	5.31323	1.07699e-07	8.19067e-07
RTCA-AS1	20.4947	-0.763194	0.143675	-5.31196	1.08453e-07	8.24331e-07
AC063979.2	4.50029	-1.44039	0.271184	-5.31147	1.08743e-07	8.26062e-07
FAM174A	27.453	-0.66752	0.125713	-5.30985	1.09715e-07	8.32967e-07
KLHDC8A	55.1519	0.733327	0.138141	5.30852	1.10517e-07	8.3857e-07
NEMP2	7.07114	1.35107	0.254871	5.30101	1.15166e-07	8.73347e-07
SLC22A17	45.5967	-0.491865	0.0927898	-5.30085	1.15263e-07	8.7358e-07
MAPK12	5.18146	-1.07583	0.202983	-5.30012	1.15724e-07	8.76574e-07
THUMPD2	89.654	-0.353697	0.0667526	-5.29863	1.16677e-07	8.83286e-07
GRIK1-AS1	24.0104	-2.04124	0.385342	-5.29722	1.1758e-07	8.89612e-07
FAM149A	19.3683	-0.729346	0.13773	-5.29548	1.18706e-07	8.97618e-07
CA1	8.90492	-0.944574	0.178441	-5.29347	1.20017e-07	9.07015e-07
AC008568.1	6.07396	-2.6398	0.498835	-5.29192	1.21038e-07	9.14211e-07
NEK7	112.435	0.341937	0.0646271	5.29093	1.21694e-07	9.18196e-07
ARID2	223.117	0.266557	0.0503801	5.29092	1.21705e-07	9.18196e-07
THNSL2	13.4434	-0.849084	0.160542	-5.28886	1.23078e-07	9.28028e-07
FAM27C	43.7168	-0.508464	0.0961456	-5.28848	1.23334e-07	9.2943e-07
RPH3A	19.3845	1.897	0.358734	5.28802	1.23645e-07	9.31246e-07
OSBPL1A	122.606	0.42311	0.0800459	5.28584	1.25131e-07	9.41902e-07
ARPP21	20.4194	-2.55064	0.482685	-5.28428	1.26203e-07	9.49427e-07
NME3	91.464	-0.394358	0.0746324	-5.28401	1.26386e-07	9.50107e-07
EPS15L1	123.349	-0.328785	0.0622236	-5.28394	1.26437e-07	9.50107e-07
NCOA2	209.94	0.30937	0.0586002	5.27933	1.29658e-07	9.73758e-07
RRAGD	35.591	-0.627799	0.118935	-5.27851	1.30241e-07	9.77584e-07
PKN2	251.976	-0.219675	0.0416419	-5.27533	1.32517e-07	9.94101e-07
ZFP36L1	6.4814	-1.67524	0.317596	-5.27475	1.32934e-07	9.96667e-07
POP1	19.7087	-0.708637	0.134471	-5.26979	1.36576e-07	1.02339e-06
SELENOM	25.4474	-0.912734	0.17321	-5.26952	1.36779e-07	1.02433e-06
AC016723.1	10.323	1.49921	0.284593	5.2679	1.37994e-07	1.03284e-06
IDH1	25.3358	-0.592624	0.112549	-5.26547	1.39831e-07	1.046e-06
AC116903.2	16.5367	-1.88344	0.357795	-5.26402	1.40939e-07	1.0537e-06
PKD2L2	14.4779	-0.798833	0.151773	-5.26335	1.41451e-07	1.05693e-06
TTC21A	10.8511	-0.831767	0.158065	-5.26217	1.42361e-07	1.06299e-06
LINC00634	8.30114	-0.988646	0.187881	-5.2621	1.42423e-07	1.06299e-06
AC006115.2	48.224	-0.450482	0.0856128	-5.26185	1.42609e-07	1.06378e-06
BHLHE40	105.423	0.677937	0.128848	5.26155	1.4285e-07	1.06497e-06
VLDLR-AS1	67.6079	-0.469318	0.0892413	-5.25898	1.44858e-07	1.07934e-06
LINC00893	27.8755	0.643747	0.122424	5.25834	1.45358e-07	1.08246e-06
SYNGR1	110.362	0.350982	0.0667716	5.25646	1.46858e-07	1.09301e-06
AC091138.1	114.717	-0.620965	0.118154	-5.25555	1.47583e-07	1.09779e-06
UROS	41.9833	-0.478427	0.091061	-5.25392	1.48898e-07	1.10694e-06
CASP2	9.71696	-0.873545	0.166329	-5.25191	1.50531e-07	1.11846e-06
SORBS2	365.697	-0.388138	0.0739078	-5.25166	1.50734e-07	1.11934e-06
VPS45	98.3717	0.353377	0.0673337	5.24815	1.53634e-07	1.14024e-06
AL589642.2	12.7764	1.49328	0.284559	5.2477	1.54008e-07	1.14237e-06
BSG	123.176	-0.413235	0.0787823	-5.24527	1.5605e-07	1.15687e-06
SYT4	35.8075	-0.707017	0.13483	-5.24378	1.57324e-07	1.16566e-06
RHOQ	47.8981	0.7029	0.13412	5.24081	1.59875e-07	1.1839e-06
C8orf34	47.5199	1.68895	0.322362	5.23932	1.61174e-07	1.19285e-06
AP1S2	29.3558	-0.893602	0.170608	-5.23776	1.62538e-07	1.20227e-06
LINC02284	20.2266	1.08071	0.206348	5.23732	1.62927e-07	1.20448e-06
CADM2-AS1	20.838	1.17643	0.224832	5.23249	1.67241e-07	1.23568e-06
CDKL5	66.5756	-0.481387	0.0920016	-5.23238	1.67343e-07	1.23575e-06
SPINT2	17.422	-0.746257	0.142631	-5.23208	1.67613e-07	1.23704e-06
FEZF1	10.6065	-2.25222	0.430676	-5.22949	1.69976e-07	1.25379e-06
SEMA4B	8.5219	-1.17948	0.225573	-5.22883	1.70585e-07	1.25758e-06
TBC1D8	69.1112	0.556607	0.106463	5.22816	1.71202e-07	1.26142e-06
FNIP1	157.587	0.306186	0.0585762	5.22714	1.72153e-07	1.26772e-06
PRKAA2	105.132	-0.408451	0.0781805	-5.22447	1.74659e-07	1.28546e-06
LINC00623	20.7839	-0.731904	0.140149	-5.22232	1.76699e-07	1.29975e-06
CSTF2T	7.78769	-1.08616	0.208226	-5.21623	1.826e-07	1.34241e-06
BHLHE41	413.249	0.389499	0.074731	5.21202	1.86799e-07	1.37252e-06
HIST1H2BE	6.77161	-1.17094	0.224848	-5.2077	1.91197e-07	1.40406e-06
MPG	19.3146	-0.680281	0.13064	-5.20731	1.91601e-07	1.40625e-06
P4HA2	25.9486	-0.796817	0.153036	-5.20673	1.92203e-07	1.40988e-06
PIP4K2A	21.4622	-0.744818	0.143102	-5.20479	1.94219e-07	1.42388e-06
CACNA1D	200.074	-0.372573	0.0715863	-5.20454	1.94482e-07	1.42501e-06
ST7	137.756	0.471761	0.0906557	5.20387	1.95177e-07	1.42932e-06
ATP2B2	199.13	0.366455	0.0704254	5.20345	1.95621e-07	1.43178e-06
MLXIPL	5.44263	-2.04398	0.39284	-5.20308	1.9601e-07	1.43383e-06
TLN2	42.3907	-0.617654	0.118731	-5.20211	1.97038e-07	1.44056e-06
AC022893.1	27.7097	0.663524	0.127577	5.20098	1.98244e-07	1.44777e-06
FEZ1	35.3173	-0.59746	0.114874	-5.20102	1.98197e-07	1.44777e-06
AC019197.1	22.291	-0.952373	0.183191	-5.19881	2.00572e-07	1.46397e-06
RPL5	110.296	-0.43594	0.0838559	-5.19868	2.00707e-07	1.46414e-06
RETREG3	59.0484	-0.475753	0.0915216	-5.19826	2.01167e-07	1.46669e-06
RFLNB	16.5413	-1.28894	0.248193	-5.19331	2.0659e-07	1.5054e-06
FAM117B	54.2873	-0.46683	0.0898995	-5.1928	2.07157e-07	1.5087e-06
MIRLET7BHG	35.2003	-0.599255	0.115486	-5.18899	2.11442e-07	1.53906e-06
ILK	33.0742	-0.550457	0.106104	-5.18788	2.12706e-07	1.54741e-06
RORA	6314.19	0.171598	0.0330805	5.18728	2.13391e-07	1.55154e-06
QTRT1	35.563	-0.498304	0.0961248	-5.18392	2.17266e-07	1.57884e-06
AC011369.1	16.9156	-2.17926	0.420462	-5.18302	2.18324e-07	1.58567e-06
AHI1	446.132	-0.250514	0.0483353	-5.18283	2.18546e-07	1.58641e-06
CHRM3-AS2	36.4619	-1.88203	0.363191	-5.18191	2.19624e-07	1.59292e-06
ASGR1	20.6778	-0.727462	0.140386	-5.18186	2.19684e-07	1.59292e-06
GOLGA7B	5.37051	-1.40373	0.270974	-5.18033	2.21494e-07	1.60517e-06
AC069272.1	15.5022	-0.768367	0.148352	-5.17935	2.22662e-07	1.61221e-06
TSHZ1	73.6678	0.712723	0.13761	5.17931	2.2271e-07	1.61221e-06
KMT5C	34.5896	-0.5425	0.104746	-5.17918	2.22867e-07	1.61246e-06
ELP2	104.735	-0.313167	0.060487	-5.17744	2.24955e-07	1.62668e-06
ATP1B3	94.054	0.388289	0.0750114	5.1764	2.26207e-07	1.63484e-06
NIM1K	56.6042	-0.489875	0.0946477	-5.17577	2.26972e-07	1.63947e-06
IL1RAP	20.7499	-1.8441	0.356317	-5.17544	2.27372e-07	1.64147e-06
TBX5	11.9158	-0.911534	0.176274	-5.17112	2.32691e-07	1.67895e-06
PRRG1	5.61193	-2.08165	0.402793	-5.16804	2.36556e-07	1.70591e-06
MAML3	124.446	-1.08865	0.210665	-5.16769	2.37003e-07	1.70774e-06
STARD4	21.8968	-0.789408	0.15276	-5.16764	2.37068e-07	1.70774e-06
ERI3	51.0623	-0.405938	0.0785721	-5.16644	2.38589e-07	1.71776e-06
ATP8A1	143.849	0.529937	0.102604	5.1649	2.40571e-07	1.73109e-06
GRK3	66.6349	-0.454107	0.0879349	-5.16413	2.41556e-07	1.73724e-06
RPAP2	176.326	-0.255837	0.0495587	-5.16231	2.43923e-07	1.7533e-06
EPB41L5	181.594	0.302722	0.0586761	5.1592	2.48008e-07	1.7817e-06
PSME2	28.0793	-0.550694	0.106752	-5.15865	2.48742e-07	1.786e-06
IQGAP2	22.1978	1.79309	0.347599	5.15851	2.48921e-07	1.78632e-06
ZNF362	33.0016	-0.525941	0.102005	-5.156	2.52275e-07	1.8094e-06
G3BP1	65.6665	-0.439228	0.0851913	-5.15579	2.52569e-07	1.81054e-06
CHAMP1	18.9103	-0.750263	0.145529	-5.15543	2.53055e-07	1.81304e-06
EXOC5	93.964	0.302024	0.0586004	5.15397	2.55035e-07	1.82623e-06
AC011474.1	13.3244	-2.22302	0.431375	-5.15333	2.559e-07	1.83144e-06
TAB2	73.1406	0.44117	0.085629	5.1521	2.5758e-07	1.84246e-06
HS3ST5	68.6171	-1.39968	0.271794	-5.14979	2.60776e-07	1.86432e-06
PRKAR1B	31.36	-0.567041	0.110202	-5.14548	2.6684e-07	1.90664e-06
ZMAT3	37.893	0.606893	0.117958	5.14499	2.67537e-07	1.91059e-06
KIRREL1	16.8421	-1.95222	0.379449	-5.14487	2.67704e-07	1.91075e-06
BSCL2	98.7238	-0.378878	0.0736724	-5.14273	2.70768e-07	1.93157e-06
AC079117.1	18.6398	-2.18456	0.424845	-5.14202	2.71807e-07	1.93794e-06
RBBP9	4.79759	-0.962306	0.187166	-5.14145	2.72625e-07	1.94273e-06
SNHG25	46.0706	-0.553811	0.107847	-5.13513	2.81943e-07	2.00805e-06
WDR61	67.085	-0.421502	0.0820874	-5.1348	2.82452e-07	2.01059e-06
STX3	237.989	0.267616	0.0521378	5.13285	2.85385e-07	2.03038e-06
PARP14	5.9663	-1.97867	0.385616	-5.13119	2.87913e-07	2.04726e-06
PKD1L1	151.593	0.348502	0.067938	5.12971	2.90189e-07	2.06123e-06
ANKRD18B	14.5424	-1.58121	0.308244	-5.12972	2.9017e-07	2.06123e-06
NETO1	1716.73	-0.3819	0.0744911	-5.12679	2.94728e-07	2.09234e-06
ATF7IP	183.914	-0.281485	0.0549238	-5.12501	2.97521e-07	2.11104e-06
NAB1	32.971	0.637677	0.124438	5.12446	2.98385e-07	2.11604e-06
GLRA1	88.9925	-0.910355	0.177702	-5.12295	3.00797e-07	2.132e-06
BANP	47.9492	-0.450981	0.0881678	-5.11503	3.13692e-07	2.22221e-06
PLCXD2	8.94426	-0.928067	0.181461	-5.11441	3.14727e-07	2.22835e-06
NUDCD2	33.9682	-0.544874	0.106546	-5.11399	3.15428e-07	2.23211e-06
AC016705.2	12.3313	-0.768537	0.150326	-5.11245	3.18003e-07	2.24914e-06
SELENOI	61.6629	-0.450672	0.0882012	-5.10959	3.22858e-07	2.28225e-06
LRRC34	8.77139	-0.887463	0.173693	-5.10938	3.23218e-07	2.28358e-06
GALNT14	29.3919	0.803691	0.157463	5.104	3.32541e-07	2.34819e-06
ARFGEF3	103.131	0.749901	0.146943	5.10335	3.3369e-07	2.35505e-06
NYX	22.2238	0.926206	0.181548	5.10171	3.3659e-07	2.37425e-06
MTERF1	71.1946	0.547416	0.107353	5.09923	3.41038e-07	2.40434e-06
BCL6	37.6016	-0.544202	0.10684	-5.09362	3.51282e-07	2.47525e-06
MSL1	34.6994	-0.559429	0.109848	-5.09276	3.52896e-07	2.4853e-06
TTLL11	30.8113	-0.525896	0.103286	-5.09165	3.54962e-07	2.49852e-06
AC243964.3	35.0911	-0.774076	0.152315	-5.08206	3.73371e-07	2.6267e-06
LPP	39.4932	-0.929358	0.182884	-5.08168	3.74114e-07	2.62774e-06
SEZ6L2	100.355	-0.379285	0.0746371	-5.08172	3.74035e-07	2.62774e-06
CCDC144NL	4.97695	-1.22352	0.240766	-5.08176	3.73945e-07	2.62774e-06
RIPK1	48.935	0.528008	0.103937	5.08009	3.77251e-07	2.64836e-06
TBC1D9B	35.0225	-0.498349	0.0981748	-5.07614	3.85185e-07	2.70263e-06
LRRC7	717.29	-0.502264	0.0989492	-5.07598	3.85505e-07	2.70344e-06
LIX1L	27.8401	-0.562632	0.110848	-5.07568	3.86107e-07	2.70623e-06
ZNF618	39.6299	-0.643086	0.126739	-5.07411	3.89312e-07	2.72724e-06
PTMS	199.695	-0.353845	0.0697633	-5.07208	3.93482e-07	2.755e-06
PRICKLE1	330.351	0.462068	0.0911088	5.07161	3.94468e-07	2.76044e-06
ETV6	27.9249	-0.96378	0.190147	-5.06859	4.00764e-07	2.80302e-06
LINC00954	6.86917	-2.14272	0.423517	-5.05934	4.20717e-07	2.94102e-06
STRIP2	18.7234	-0.99162	0.196067	-5.05757	4.24642e-07	2.96689e-06
MRPL19	58.457	-0.409395	0.0809598	-5.05676	4.26428e-07	2.9778e-06
VPS26B	29.797	-0.523708	0.103595	-5.05535	4.29613e-07	2.99846e-06
CYGB	25.9453	-0.733964	0.145251	-5.05307	4.34769e-07	3.03284e-06
YLPM1	118.734	-0.303333	0.0600417	-5.05203	4.37136e-07	3.04775e-06
AC007349.2	7.40315	1.68689	0.333921	5.05177	4.37745e-07	3.04878e-06
CCDC187	3.71563	-2.00431	0.396747	-5.05185	4.37543e-07	3.04878e-06
RPS6KA5	113.695	-0.374173	0.0740956	-5.04987	4.42114e-07	3.07759e-06
AC020913.1	4.85886	-1.09016	0.215914	-5.04907	4.43959e-07	3.08881e-06
NDUFA5	83.8301	-0.445121	0.0881622	-5.04889	4.44395e-07	3.09021e-06
CRADD	222.498	0.351017	0.0695338	5.04814	4.46126e-07	3.10062e-06
NABP1	5.83574	-1.68959	0.334904	-5.04501	4.53501e-07	3.15022e-06
MAGI1-AS1	5.97971	-1.81952	0.360767	-5.04347	4.57163e-07	3.174e-06
UBE4A	42.4692	-0.4749	0.0941696	-5.04303	4.58217e-07	3.17965e-06
EPN2	125.354	-0.300697	0.059682	-5.03832	4.69635e-07	3.25717e-06
AMY2B	56.46	0.493282	0.0979292	5.03712	4.72579e-07	3.27587e-06
MMAB	38.3878	-0.458603	0.0910855	-5.03486	4.78201e-07	3.31311e-06
FAM161A	45.8474	-0.791271	0.157228	-5.03263	4.83801e-07	3.34844e-06
PTAR1	50.2286	-0.486467	0.0966627	-5.03263	4.83807e-07	3.34844e-06
RPS8	101.191	-0.440215	0.0875047	-5.03076	4.88545e-07	3.37947e-06
AQP3	6.57077	-2.00748	0.399075	-5.03032	4.89674e-07	3.38551e-06
LINGO3	11.8185	-0.899228	0.17877	-5.03009	4.90239e-07	3.38764e-06
CELF3	101.248	-0.367123	0.0729942	-5.02948	4.91808e-07	3.39592e-06
B3GNT2	11.7715	1.48216	0.294705	5.02929	4.92297e-07	3.39592e-06
AC011586.1	24.9493	-2.38475	0.474179	-5.02923	4.92464e-07	3.39592e-06
ARFGAP1	17.3048	-0.675625	0.134339	-5.02924	4.92423e-07	3.39592e-06
AC009053.3	20.6211	0.771314	0.153398	5.02818	4.95159e-07	3.41273e-06
LINC01362	5.48875	1.54599	0.307478	5.02798	4.95673e-07	3.41449e-06
CBFA2T3	17.1339	-0.828867	0.165125	-5.01965	5.17658e-07	3.56408e-06
PCDHB4	4.79067	-1.40574	0.280094	-5.0188	5.19941e-07	3.57794e-06
ANTXR2	78.9056	0.906193	0.180566	5.01864	5.20398e-07	3.57922e-06
AC010478.1	83.5097	-0.666321	0.132806	-5.01724	5.24184e-07	3.60339e-06
NFYB	22.6307	-0.611865	0.122007	-5.01501	5.30311e-07	3.64362e-06
CERS6	122.697	0.526633	0.105069	5.01225	5.37976e-07	3.69437e-06
SERTM1	18.8393	-1.83465	0.366212	-5.00981	5.44841e-07	3.73956e-06
HIST1H2BN	7.21847	-1.14659	0.229077	-5.00524	5.57926e-07	3.82739e-06
TPRG1	20.3462	-2.00245	0.400126	-5.00455	5.59922e-07	3.83909e-06
ULK2	100.406	-0.342605	0.0684729	-5.00351	5.62967e-07	3.85797e-06
VPS37B	47.3488	0.524557	0.104891	5.00096	5.70441e-07	3.90717e-06
B4GALNT1	4.91938	-1.06968	0.214009	-4.99828	5.78443e-07	3.95993e-06
STX8	99.2891	0.354287	0.0709073	4.99649	5.83847e-07	3.99485e-06
ZFYVE28	102.937	0.469979	0.0941054	4.99418	5.90866e-07	4.04079e-06
KCNH5	304.332	0.77546	0.155318	4.99273	5.95322e-07	4.06916e-06
SHOC2	60.4755	-0.414958	0.0831249	-4.99199	5.97607e-07	4.08267e-06
SLC25A27	207.024	-0.290226	0.0581451	-4.99141	5.99397e-07	4.09278e-06
C5orf56	38.31	-0.510628	0.102347	-4.98919	6.0634e-07	4.13806e-06
C16orf95	13.8154	-0.719285	0.144187	-4.98857	6.08286e-07	4.1492e-06
NET1	15.0611	-0.789675	0.158302	-4.98841	6.08774e-07	4.15039e-06
EBPL	13.4322	-0.871393	0.174798	-4.98513	6.192e-07	4.2193e-06
XKR4	170.246	-1.28248	0.257525	-4.98003	6.35745e-07	4.32981e-06
AL359504.2	31.0501	-0.570671	0.114611	-4.97918	6.38547e-07	4.34665e-06
ANKRD13D	45.7293	-0.42328	0.0850211	-4.97853	6.40696e-07	4.35904e-06
TPBGL	6.4182	-1.98109	0.398155	-4.97566	6.50251e-07	4.42177e-06
PTCH1	44.0863	-0.554009	0.11136	-4.97493	6.5271e-07	4.43622e-06
SSH1	51.4083	-0.45097	0.0906843	-4.97296	6.59381e-07	4.47925e-06
SHANK2	236.665	-0.361895	0.0727837	-4.9722	6.61957e-07	4.49247e-06
PDIA2	5.33025	-1.1528	0.231849	-4.97219	6.62005e-07	4.49247e-06
EMB	6.66817	-1.31197	0.263892	-4.9716	6.64034e-07	4.50393e-06
TAP2	10.2503	-0.884529	0.177948	-4.97071	6.67065e-07	4.52217e-06
AC005487.1	10.2887	-2.24457	0.451576	-4.97053	6.67695e-07	4.52412e-06
CHRNA7	42.4029	-1.82293	0.366775	-4.97016	6.68985e-07	4.53054e-06
TMEM181	34.9034	0.709885	0.142943	4.96621	6.82723e-07	4.62122e-06
CDK5RAP3	59.0891	-0.367069	0.0739562	-4.96332	6.9297e-07	4.68818e-06
RD3	82.8817	0.629646	0.126878	4.96263	6.95461e-07	4.70262e-06
LINC02506	19.9954	-2.47882	0.499806	-4.95956	7.06541e-07	4.77511e-06
FAM133B	87.0922	-0.353094	0.071282	-4.95348	7.28984e-07	4.92427e-06
SMARCA5	104.579	-0.350414	0.0708004	-4.94932	7.44743e-07	5.02816e-06
VDAC3	113.972	-0.317253	0.0641019	-4.9492	7.45205e-07	5.02819e-06
CHCHD7	21.1945	-0.628698	0.127032	-4.94912	7.45509e-07	5.02819e-06
GABRG3	7.31457	-1.9337	0.390919	-4.94655	7.55406e-07	5.08976e-06
IGDCC4	19.0729	-0.640669	0.129518	-4.94655	7.55396e-07	5.08976e-06
GNG7	13.8546	-0.786654	0.159126	-4.94359	7.66964e-07	5.16501e-06
MSH4	6.96864	1.22385	0.247604	4.94278	7.70175e-07	5.18399e-06
ZNF608	269.364	0.308491	0.0624141	4.94266	7.70653e-07	5.18457e-06
ESF1	81.5356	-0.400229	0.0809826	-4.94215	7.72642e-07	5.19531e-06
FBXO31	25.383	-0.556492	0.11265	-4.94002	7.8113e-07	5.24971e-06
WNT5A	5.97542	1.61915	0.327826	4.93906	7.84984e-07	5.27294e-06
ACVR1C	2.52855	-1.94772	0.394418	-4.93821	7.8841e-07	5.29327e-06
XPR1	113.643	-0.3387	0.0686195	-4.93591	7.97779e-07	5.35346e-06
TWISTNB	9.36114	-0.95999	0.194505	-4.93556	7.99219e-07	5.3604e-06
LINC02456	60.0969	0.587536	0.11907	4.93438	8.04072e-07	5.39022e-06
PCSK2	58.1934	0.699637	0.141811	4.93358	8.07364e-07	5.40954e-06
USP34	562.69	0.145369	0.0294886	4.92967	8.23684e-07	5.5161e-06
MRS2	56.6828	-0.384915	0.078106	-4.9281	8.30311e-07	5.55767e-06
LIN7A	316.811	0.42226	0.0856866	4.92796	8.30922e-07	5.55894e-06
NAALADL2	248.333	0.351155	0.071335	4.92262	8.53941e-07	5.71006e-06
PCBP4	196.007	0.359168	0.0729919	4.92065	8.62552e-07	5.76347e-06
HS3ST2	94.1513	-1.39355	0.283208	-4.9206	8.628e-07	5.76347e-06
MAPK14	74.7065	-0.355427	0.0722348	-4.92045	8.63471e-07	5.76504e-06
CASKIN1	37.2743	-0.480436	0.0976443	-4.92026	8.64274e-07	5.76749e-06
CRTAP	15.1143	-0.68257	0.138774	-4.91859	8.71711e-07	5.81419e-06
TRMT13	56.5103	-0.385032	0.0783067	-4.91697	8.78931e-07	5.85939e-06
UBTD2	33.2814	-0.654135	0.133045	-4.91666	8.80337e-07	5.86581e-06
HEBP2	11.7098	1.2356	0.251404	4.9148	8.8874e-07	5.91882e-06
FER	393	-0.207982	0.0423393	-4.91226	9.00316e-07	5.9929e-06
WDR11-AS1	57.857	-0.444876	0.0905987	-4.9104	9.08901e-07	6.04701e-06
TNS2	21.4474	-0.55335	0.112715	-4.90926	9.1419e-07	6.07914e-06
XPC	41.3194	-0.452171	0.0921448	-4.90717	9.23982e-07	6.14116e-06
RPSA	103.899	-0.405388	0.0826538	-4.90465	9.35944e-07	6.21754e-06
EMP2	4.89107	-2.25211	0.459536	-4.90084	9.54266e-07	6.33607e-06
GNAI3	59.3023	0.47118	0.096187	4.89858	9.65296e-07	6.4061e-06
YWHAB	94.1464	-0.409788	0.0836696	-4.89769	9.69705e-07	6.43213e-06
LMOD2	12.8604	-2.15003	0.439062	-4.89687	9.73768e-07	6.45584e-06
PCF11	55.7006	-0.407704	0.0832664	-4.89638	9.76163e-07	6.46849e-06
SOX2-OT	167.287	0.474688	0.0969589	4.89576	9.79253e-07	6.48571e-06
[truncated: 11,235 more rows]
