# Supplementary material for: Integrated multi-omics single cell atlas of the human retina
Source: Research Square preprint supplement (doi:10.21203/rs.3.rs-3471275/v1), 2023-11-16
Supplement: Supplementary file 13 [file 7f27c6b3fed352c7a6f47520.xlsx]

## Sheet: snRNA_vs_scRNA_full_cells
Table S5. Differential gene expression analysis of snRNA-seq samples compared to scRNA-seq samples
symbol	baseMean	log2FoldChange	lfcSE	stat	pvalue	padj
MRPL20	203.292	-2.05756	0.0425539	-48.3519	0	0
SSU72	230.667	-1.81136	0.0398786	-45.4217	0	0
AL691432.2	42.9891	-2.3983	0.0526078	-45.5884	0	0
LRRC47	73.1183	-1.46363	0.0387553	-37.7659	0	0
PARK7	518.119	-2.67091	0.0686934	-38.8816	0	0
SDHB	207.283	-1.11387	0.022575	-49.3408	0	0
AKR7A2	108.834	-1.75741	0.044779	-39.2462	0	0
USP48	420.444	0.783934	0.0208101	37.6708	0	0
PITHD1	194.759	-1.82375	0.0460659	-39.5901	0	0
SYF2	150.201	-1.93897	0.0427965	-45.3067	0	0
MTFR1L	106.718	-1.56165	0.0411619	-37.9392	0	0
HMGN2	499.491	-1.79182	0.0455451	-39.3417	0	0
GPATCH3	20.6427	-1.6643	0.0374277	-44.467	0	0
NUDC	294.48	-2.17916	0.0414985	-52.5119	0	0
RPA2	87.5487	-1.51578	0.0381831	-39.6976	0	0
DNAJC8	260.028	-1.86649	0.0449221	-41.5496	0	0
YTHDF2	123.012	-1.23805	0.0306055	-40.452	0	0
PEF1	88.5765	-2.07608	0.0464097	-44.7338	0	0
KHDRBS1	362.196	-1.10132	0.0232087	-47.453	0	0
EIF3I	120.151	-2.33622	0.0510816	-45.7351	0	0
ZMYM4	578.264	0.849563	0.0219098	38.7755	0	0
PSMB2	157.515	-1.22717	0.0305075	-40.2251	0	0
ADPRHL2	50.4035	-1.62269	0.0411511	-39.4326	0	0
TRAPPC3	125.801	-1.84832	0.0340911	-54.2172	0	0
LSM10	54.876	-2.21864	0.0534755	-41.4889	0	0
MRPS15	80.1606	-1.82473	0.0441073	-41.3702	0	0
MEAF6	180.377	-1.73942	0.0417489	-41.6638	0	0
GNL2	51.3956	-1.35969	0.0305096	-44.5661	0	0
CAP1	161.054	-1.67995	0.0389512	-43.1295	0	0
PPT1	182.989	-1.7709	0.0417784	-42.3879	0	0
PPCS	59.4076	-1.87712	0.047204	-39.7661	0	0
RPS8	927.887	-3.29009	0.0723012	-45.5053	0	0
UROD	61.1066	-2.06247	0.0498153	-41.4022	0	0
RNF11	230.379	-1.56327	0.0348981	-44.7954	0	0
TXNDC12	99.0935	-1.04639	0.0272638	-38.3803	0	0
MAGOH	99.6187	-1.40209	0.0359548	-38.996	0	0
TMEM59	532.997	-1.77546	0.0439805	-40.3693	0	0
SERBP1	250.567	-1.55461	0.0395124	-39.3449	0	0
RPF1	68.0797	-1.70806	0.0375288	-45.5133	0	0
EVI5	476.416	0.743199	0.019734	37.6608	0	0
RPL5	740.409	-2.72697	0.0619991	-43.9839	0	0
SARS	292.368	-1.52903	0.0365463	-41.8383	0	0
LAMTOR5	303.493	-2.80781	0.0699647	-40.1318	0	0
RBM8A	126.901	-2.29528	0.0520821	-44.0705	0	0
POLR3GL	102.359	-1.60834	0.0344797	-46.6461	0	0
AC239799.2	11.6485	-4.21881	0.108001	-39.0628	0	0
HIST2H2BE	102.573	-3.07229	0.0725794	-42.33	0	0
BOLA1	35.6173	-2.1258	0.0551436	-38.5503	0	0
MRPS21	226.758	-1.77635	0.0368195	-48.2447	0	0
ARNT	291.886	0.852779	0.0203362	41.934	0	0
VPS72	57.7332	-1.54623	0.0349047	-44.2985	0	0
PSMD4	185.329	-1.53397	0.0328272	-46.7287	0	0
MRPL9	54.3264	-1.90754	0.041638	-45.8125	0	0
CHTOP	114.835	-1.31283	0.0302461	-43.4048	0	0
SNAPIN	70.5189	-2.26936	0.0508462	-44.6319	0	0
ILF2	101.207	-1.94686	0.0415082	-46.9029	0	0
JTB	159.464	-2.40022	0.0496159	-48.3759	0	0
C1orf43	300.45	-1.97495	0.0400221	-49.3464	0	0
HAX1	137.783	-1.79878	0.0418503	-42.9813	0	0
PMVK	151.333	-2.62726	0.0505458	-51.9777	0	0
DPM3	83.4274	-2.24098	0.0516488	-43.3888	0	0
SSR2	125.024	-2.15824	0.050795	-42.4892	0	0
LAMTOR2	86.2997	-2.64068	0.0607897	-43.4396	0	0
NAXE	51.7544	-2.51745	0.0566661	-44.426	0	0
MRPL24	54.9629	-2.17038	0.0462475	-46.9298	0	0
DUSP23	45.9918	-2.93404	0.0754932	-38.865	0	0
PEA15	341.576	-2.26011	0.0583991	-38.7011	0	0
PEX19	49.2632	-1.66481	0.0422662	-39.3888	0	0
PFDN2	162.094	-2.18826	0.0553186	-39.5574	0	0
UFC1	141.727	-2.44501	0.0514759	-47.4982	0	0
SDHC	252.158	-1.04323	0.0273323	-38.1684	0	0
PRDX6	243.528	-2.28854	0.0598634	-38.2293	0	0
GAS5	161.826	-2.23325	0.0517221	-43.1778	0	0
CACYBP	245.193	-2.54647	0.0561413	-45.3583	0	0
MRPS14	92.2344	-1.48645	0.0366614	-40.5454	0	0
TIMM17A	110.728	-1.89642	0.0407919	-46.4902	0	0
RABIF	32.5255	-2.20677	0.0473037	-46.6512	0	0
TMEM183A	70.3511	-1.82444	0.0419023	-43.5404	0	0
SNRPE	138.619	-2.31373	0.056519	-40.9373	0	0
NENF	192.202	-2.75087	0.0590203	-46.6089	0	0
ANGEL2	141.807	0.868993	0.0227962	38.1201	0	0
SRP9	368.674	-2.17621	0.0546242	-39.8396	0	0
ARF1	288.958	-1.71042	0.0455276	-37.5688	0	0
MRPL55	106.022	-2.59611	0.0545531	-47.5886	0	0
ZNF669	22.9899	-1.88051	0.0440608	-42.6798	0	0
ACP1	167.478	-1.49588	0.0362908	-41.2192	0	0
YWHAQ	563.445	-1.90111	0.037048	-51.3148	0	0
NBAS	584.815	1.15792	0.0241055	48.0356	0	0
ATAD2B	442.886	0.999173	0.0248152	40.2646	0	0
SF3B6	140.907	-2.42898	0.0582535	-41.6966	0	0
PTRHD1	43.6171	-3.20092	0.0806281	-39.6998	0	0
OST4	216.149	-3.1404	0.0684882	-45.8531	0	0
PREB	37.7994	-1.88982	0.0473594	-39.9037	0	0
SNX17	86.4059	-2.25597	0.0530223	-42.5476	0	0
GPN1	34.0076	-1.40666	0.0355579	-39.5596	0	0
MRPL33	285.399	-1.66705	0.044246	-37.6769	0	0
YPEL5	216.546	-2.04399	0.0443461	-46.0918	0	0
DPY30	136.839	-1.63708	0.0386819	-42.3215	0	0
MAP4K3	784.602	0.930302	0.0215232	43.2232	0	0
CALM2	2487.82	-2.17053	0.057033	-38.0575	0	0
USP34	1479.02	0.897578	0.0202094	44.4139	0	0
CCT4	230.545	-1.87553	0.0377342	-49.7037	0	0
NFU1	140.164	-1.17726	0.0287173	-40.995	0	0
SNRNP27	107.726	-1.88674	0.0424783	-44.4166	0	0
SNRPG	269.987	-2.53394	0.0469585	-53.9612	0	0
DGUOK	174.651	-1.22393	0.0295495	-41.4197	0	0
BOLA3	107.999	-2.09682	0.0517138	-40.5466	0	0
WBP1	112.25	-1.68183	0.044286	-37.9765	0	0
AUP1	97.4163	-1.75294	0.0406027	-43.1731	0	0
RNF181	79.5749	-2.80097	0.05916	-47.3457	0	0
KANSL3	158.949	1.0616	0.0252489	42.0456	0	0
COX5B	673.224	-2.79605	0.0694674	-40.2498	0	0
TMEM131	418.268	1.01095	0.025371	39.8465	0	0
REV1	381.597	0.692944	0.0172483	40.1746	0	0
RPL31	631.66	-3.72502	0.0666709	-55.8717	0	0
CHCHD5	55.1667	-2.21197	0.0530294	-41.7122	0	0
CCDC115	79.4511	-2.38132	0.0571053	-41.7004	0	0
IMP4	56.7435	-2.15096	0.0530397	-40.5538	0	0
ZRANB3	415.814	1.02434	0.0251917	40.662	0	0
MMADHC	100.069	-1.64645	0.0387691	-42.468	0	0
PPIG	518.745	-0.769539	0.0194716	-39.5211	0	0
SSB	245.927	-1.39241	0.0363075	-38.3505	0	0
UBR3	998.501	0.87856	0.0219182	40.0836	0	0
COQ10B	150.482	-1.70552	0.0396357	-43.0299	0	0
HSPE1	477.76	-2.88133	0.0666711	-43.2171	0	0
MOB4	176.313	-1.12531	0.0290404	-38.7499	0	0
SUMO1	346.232	-1.91868	0.0364705	-52.6092	0	0
ARPC2	320.259	-1.48227	0.0314691	-47.1025	0	0
AAMP	128.246	-1.83478	0.0390717	-46.9593	0	0
PNKD	190.578	-1.82372	0.0449919	-40.5343	0	0
TRIP12	467.475	0.873474	0.0220491	39.615	0	0
GIGYF2	585.112	0.779013	0.0170795	45.6109	0	0
USP40	229.196	1.06305	0.0276819	38.4024	0	0
COPS8	224.348	-1.88721	0.0326776	-57.7524	0	0
COPS9	232.39	-3.2899	0.0743325	-44.2593	0	0
PPP1R7	160.276	-1.50358	0.0391181	-38.4371	0	0
TADA3	105.956	-1.299	0.0330145	-39.3465	0	0
BRK1	169.551	-2.44733	0.0532973	-45.9184	0	0
CHCHD4	24.2733	-2.81568	0.0687724	-40.942	0	0
LSM3	131.91	-2.39353	0.0623267	-38.4029	0	0
NKIRAS1	153.677	-1.01003	0.0258317	-39.1005	0	0
RPL15	1348.91	-3.39295	0.0876338	-38.7173	0	0
EIF1B	383.888	-1.98728	0.0477303	-41.6355	0	0
HIGD1A	185.937	-3.31002	0.0684786	-48.3366	0	0
CCDC12	167.467	-1.23307	0.0307548	-40.0935	0	0
TMA7	533.768	-2.61195	0.0627698	-41.6116	0	0
UQCRC1	187.362	-1.67682	0.0418058	-40.1096	0	0
IP6K2	271.906	-0.947546	0.0242508	-39.0728	0	0
NDUFAF3	137.523	-3.04211	0.067252	-45.2344	0	0
RHOA	292.718	-1.74729	0.0416003	-42.0018	0	0
TUSC2	112.282	-2.24709	0.0582957	-38.5464	0	0
ALAS1	44.2486	-1.76244	0.0468815	-37.5936	0	0
PDHB	99.9173	-1.72965	0.0428825	-40.3347	0	0
ATXN7	299.337	0.891571	0.0235188	37.9089	0	0
MTRNR2L12	59.1283	-7.5846	0.145988	-51.9536	0	0
SENP7	414.611	1.10132	0.0236281	46.6105	0	0
PCNP	317.296	-1.63038	0.0353855	-46.075	0	0
ATG3	96.21	-1.39047	0.0311503	-44.6374	0	0
COX17	340.576	-2.94972	0.0757841	-38.9227	0	0
NDUFB4	349.737	-2.3887	0.0547118	-43.6596	0	0
RAB7A	518.239	-1.0886	0.0260347	-41.8137	0	0
CNBP	406.037	-2.04295	0.0472251	-43.2599	0	0
HMCES	99.0048	-1.05446	0.0273294	-38.5832	0	0
ANAPC13	92.4667	-2.92433	0.0613862	-47.6382	0	0
RNF7	127.538	-2.01368	0.0530775	-37.9385	0	0
PFN2	221.213	-2.82807	0.0606674	-46.6159	0	0
MLF1	131.363	-2.10953	0.0545188	-38.6937	0	0
SEC62	1015.92	-1.71866	0.0414623	-41.4513	0	0
PHC3	620.918	0.839878	0.0216346	38.8212	0	0
TBL1XR1	918.62	1.00898	0.0262422	38.4486	0	0
MFN1	222.073	0.936688	0.022743	41.1857	0	0
DNAJC19	138.052	-1.44295	0.0378536	-38.1192	0	0
AP2M1	441.912	-2.14868	0.0470639	-45.6546	0	0
PSMD2	152.049	-1.53934	0.0404665	-38.0398	0	0
EIF4A2	1050.8	-2.6363	0.0690365	-38.1871	0	0
PPP1R2	216.484	-1.29607	0.0255066	-50.8131	0	0
NCBP2	121.074	-1.5996	0.0381275	-41.954	0	0
RPL35A	881.981	-3.2639	0.080892	-40.3489	0	0
GRPEL1	85.4182	-1.86939	0.045876	-40.7488	0	0
TBC1D19	309.723	0.866408	0.0225218	38.4697	0	0
CCNI	1051.76	-2.10418	0.0496133	-42.4116	0	0
ENOPH1	143.899	-1.66646	0.0327323	-50.9119	0	0
MRPS18C	110.848	-1.6032	0.0348252	-46.0356	0	0
WDFY3	889.38	1.07065	0.0249365	42.9353	0	0
WDFY3-AS1	24.6878	3.26767	0.0855824	38.1816	0	0
PYURF	118.109	-2.89171	0.058172	-49.7097	0	0
EIF4E	312.753	-1.01561	0.0241359	-42.0789	0	0
LAMTOR3	89.7065	-1.51563	0.0390612	-38.8013	0	0
AIMP1	159.625	-1.24811	0.0285011	-43.7917	0	0
RPL34	1475	-3.63836	0.0882409	-41.2321	0	0
SNHG8	166.945	-2.34526	0.059809	-39.2125	0	0
NDUFC1	367.918	-2.49296	0.0587789	-42.4125	0	0
DROSHA	202.789	0.884855	0.0225858	39.1775	0	0
SUB1	345.013	-1.93628	0.0428564	-45.1808	0	0
BRIX1	70.0991	-1.53843	0.0401515	-38.3156	0	0
WDR70	513.119	0.92465	0.0242315	38.159	0	0
MOCS2	124.661	-2.23256	0.0501902	-44.482	0	0
SMIM15	56.658	-2.32409	0.0616156	-37.7192	0	0
MRPS36	151.014	-1.71125	0.0413342	-41.4004	0	0
BTF3	392.861	-2.84564	0.067931	-41.8902	0	0
TBCA	548.717	-1.37023	0.029221	-46.892	0	0
COX7C	836.809	-3.27142	0.0713229	-45.8678	0	0
RASA1	607.531	1.16063	0.0251169	46.2089	0	0
FAM172A	845.806	0.726587	0.0189974	38.2467	0	0
YTHDC2	475.907	0.87568	0.0194571	45.0056	0	0
DMXL1	532.707	0.980755	0.0200719	48.8622	0	0
LYRM7	98.1037	-0.931571	0.0246508	-37.7907	0	0
UQCRQ	439.411	-3.30276	0.063499	-52.0127	0	0
SKP1	963.878	-2.27012	0.0545549	-41.6117	0	0
PPP2CA	271.894	-1.27849	0.028395	-45.0254	0	0
CAMLG	224.902	-2.00718	0.0432451	-46.4141	0	0
HNRNPA0	197.112	-2.52102	0.0493667	-51.0671	0	0
PAIP2	464.418	-1.99811	0.0366507	-54.5177	0	0
NDUFA2	235.116	-2.93518	0.0688568	-42.6273	0	0
IK	159.616	-1.71759	0.0434641	-39.5174	0	0
TAF7	281.379	-1.9394	0.0471223	-41.1567	0	0
ATOX1	134.852	-2.25261	0.0508981	-44.2573	0	0
SLU7	127.099	-1.51696	0.0378081	-40.1226	0	0
CCNG1	81.626	-2.14748	0.0428311	-50.1384	0	0
AC022217.3	86.8809	-3.65624	0.0969865	-37.6985	0	0
RPL26L1	56.6093	-2.46601	0.0630453	-39.1149	0	0
NOP16	14.2594	-2.36008	0.0618132	-38.1808	0	0
HIGD2A	152.778	-2.68247	0.0618247	-43.3883	0	0
NHP2	121.549	-2.82225	0.0636528	-44.3383	0	0
HEIH	80.6776	-2.07142	0.0541144	-38.2784	0	0
RACK1	550.867	-2.51159	0.0531561	-47.2494	0	0
MYLIP	87.7454	-2.82912	0.0645092	-43.856	0	0
GMNN	47.3693	-1.64123	0.0434484	-37.7741	0	0
PPP1R11	101.338	-1.99989	0.0501622	-39.8684	0	0
RPP21	76.8414	-1.98262	0.0482446	-41.0952	0	0
MRPS18B	108.607	-1.70735	0.0411817	-41.4591	0	0
BAG6	108.513	-1.34867	0.0338395	-39.855	0	0
CSNK2B	147.647	-2.55215	0.0484532	-52.6725	0	0
LSM2	90.9741	-2.0906	0.0419599	-49.8237	0	0
NELFE	67.3338	-1.67497	0.0407022	-41.1519	0	0
RNF5	82.2338	-2.8436	0.0670603	-42.4037	0	0
BRD2	154.417	-1.521	0.0398824	-38.1372	0	0
CUTA	256.418	-2.32482	0.0583765	-39.8246	0	0
SMIM29	111.435	-2.13571	0.0560825	-38.0816	0	0
SNRPC	86.8437	-1.97668	0.0444619	-44.4579	0	0
CCDC167	48.6521	-2.23174	0.0523791	-42.6074	0	0
GLO1	277.743	-2.07277	0.0419321	-49.4317	0	0
TBCC	85.2741	-2.19691	0.0556208	-39.498	0	0
MEA1	75.7709	-3.2873	0.0685873	-47.9288	0	0
KLHDC3	118.52	-1.7505	0.0436528	-40.1005	0	0
MRPL2	66.574	-1.80164	0.0427565	-42.1371	0	0
DNPH1	53.1391	-2.2945	0.0568371	-40.3698	0	0
YIPF3	137.974	-2.00952	0.049834	-40.3242	0	0
MRPS18A	47.7659	-1.77612	0.0420028	-42.2857	0	0
MRPL14	106.883	-1.92024	0.0492052	-39.0252	0	0
ZNF451	346.632	0.817954	0.0209187	39.1017	0	0
COX7A2	796.367	-3.15505	0.07867	-40.1048	0	0
ASCC3	441.098	0.956636	0.0248154	38.5501	0	0
HACE1	312.496	1.06153	0.0276956	38.3284	0	0
SNX3	331.323	-2.36327	0.0435281	-54.293	0	0
AFG1L	210.731	1.11066	0.0276482	40.1712	0	0
GTF3C6	90.4398	-2.09448	0.0544729	-38.4499	0	0
FAM229B	120.329	-1.79507	0.0365003	-49.1796	0	0
HDAC2	145.779	-1.09699	0.0238948	-45.9094	0	0
RWDD1	335.004	-1.50134	0.0357531	-41.9919	0	0
ASF1A	57.2432	-1.73766	0.0441531	-39.3553	0	0
CITED2	114.997	-3.37253	0.0638123	-52.8507	0	0
SF3B5	115.788	-2.79235	0.071009	-39.3238	0	0
SCAF8	539.615	0.822534	0.0211339	38.9202	0	0
ARID1B	1970.41	0.937023	0.0237979	39.3741	0	0
GTF2H5	153.381	-1.93856	0.050425	-38.4443	0	0
TCP1	159.093	-2.06328	0.0512348	-40.271	0	0
MRPL18	140.4	-2.4842	0.056058	-44.3148	0	0
FAM120B	377.995	0.910468	0.0236081	38.5659	0	0
PSMB1	275.178	-1.81221	0.0480505	-37.7146	0	0
ZFAND2A	57.9813	-2.75869	0.0548232	-50.3196	0	0
ACTB	1587.99	-2.57013	0.0668118	-38.4682	0	0
RAC1	426.839	-2.23741	0.0475618	-47.0422	0	0
ZDHHC4	53.3967	-2.00541	0.0429388	-46.704	0	0
ARL4A	43.4139	-2.81448	0.0679949	-41.3925	0	0
SNX13	298.552	0.979336	0.0250431	39.1061	0	0
TWISTNB	44.2082	-1.92544	0.0482171	-39.9326	0	0
TOMM7	621.95	-3.01241	0.0798935	-37.7054	0	0
CBX3	319.856	-1.43972	0.0356078	-40.4328	0	0
GGCT	92.2721	-1.6502	0.0363075	-45.4508	0	0
LSM5	157.832	-1.33952	0.0303993	-44.064	0	0
AVL9	392.378	0.87712	0.023076	38.01	0	0
POLD2	105.112	-1.30104	0.0322463	-40.3471	0	0
CCT6A	182.558	-1.46391	0.0363151	-40.3113	0	0
CHCHD2	927.724	-2.52019	0.0660357	-38.1641	0	0
BCL7B	73.7206	-2.02942	0.0467528	-43.4074	0	0
BUD23	114.416	-1.3958	0.0315711	-44.2112	0	0
RHBDD2	131.862	-2.23109	0.0457115	-48.808	0	0
MDH2	151.874	-2.14385	0.0497036	-43.1328	0	0
HSPB1	647.158	-4.91175	0.12509	-39.2656	0	0
TMEM60	34.712	-2.25839	0.0595086	-37.9507	0	0
DMTF1	281.806	1.26958	0.026588	47.7499	0	0
TP53TG1	41.0161	-1.81628	0.0479605	-37.8704	0	0
SRI	155.368	-2.23179	0.055336	-40.3317	0	0
GATAD1	242.653	1.1294	0.028471	39.6684	0	0
PEX1	202.79	1.185	0.0305825	38.7476	0	0
ARPC1A	166.248	-1.22042	0.0312052	-39.1096	0	0
PDAP1	199.459	-1.79543	0.0429891	-41.7647	0	0
BUD31	101.696	-2.94542	0.0604218	-48.7477	0	0
COPS6	254.033	-1.48976	0.0337551	-44.1345	0	0
LAMTOR4	214.492	-2.49917	0.0544278	-45.9172	0	0
ZNHIT1	112.776	-2.51101	0.0576858	-43.5291	0	0
IFT22	93.4909	-1.90367	0.0440823	-43.1845	0	0
POLR2J	97.8153	-2.44843	0.0605325	-40.4481	0	0
DNAJB9	133.155	-2.53212	0.0656054	-38.5963	0	0
SMIM30	83.1525	-2.81666	0.0703257	-40.0516	0	0
CAPZA2	404.432	-1.26169	0.0269022	-46.899	0	0
NDUFA5	460.11	-2.05873	0.0531254	-38.7522	0	0
ATP6V1F	412.132	-2.86695	0.0748087	-38.3237	0	0
AKR1B1	136.22	-2.30018	0.0477747	-48.1465	0	0
UBN2	281.341	0.823529	0.0211945	38.8558	0	0
MKRN1	194.727	-1.40927	0.0285588	-49.3465	0	0
NDUFB2	478.964	-2.67118	0.0671539	-39.777	0	0
RBM33	427.175	1.21431	0.02518	48.225	0	0
UBE3C	457.017	0.823801	0.0199598	41.273	0	0
DNAJB6	474.452	-1.88948	0.0436026	-43.3341	0	0
AC100810.1	47.2933	-2.04034	0.0506478	-40.2849	0	0
XPO7	246.309	0.765219	0.0192875	39.6743	0	0
SARAF	721.617	-2.0158	0.0448885	-44.9067	0	0
GOLGA7	97.6184	-2.13824	0.0469885	-45.5057	0	0
ELOC	212.582	-2.41498	0.0420282	-57.4611	0	0
OTUD6B-AS1	238.187	-1.97022	0.0490228	-40.1898	0	0
VPS13B	749.474	1.06058	0.0236336	44.8759	0	0
POLR2K	161.282	-2.74016	0.0724024	-37.8463	0	0
PABPC1	427.32	-1.85302	0.0383199	-48.3566	0	0
UBR5	792.511	0.92219	0.02074	44.4642	0	0
EIF3E	347.39	-1.77546	0.0399009	-44.4966	0	0
EBAG9	101.067	-1.23662	0.0300487	-41.1538	0	0
EIF3H	287.327	-1.46975	0.0324145	-45.3422	0	0
RNF139	51.0849	-2.07749	0.0458289	-45.3314	0	0
NDUFB9	381.436	-2.52125	0.0479493	-52.5815	0	0
PTK2	1267.83	0.844283	0.0198322	42.5713	0	0
EEF1D	287.841	-2.2267	0.0484007	-46.0055	0	0
PUF60	122.353	-2.03287	0.0528471	-38.4669	0	0
EXOSC4	24.6043	-2.33115	0.05671	-41.1065	0	0
CYC1	238.134	-2.43762	0.0539743	-45.1626	0	0
SHARPIN	95.4544	-1.25589	0.033293	-37.7223	0	0
MAF1	88.3451	-2.21044	0.0512618	-43.1206	0	0
RPS6	1069.75	-3.4081	0.0863234	-39.4806	0	0
TOPORS	82.2721	-1.55581	0.0396576	-39.2311	0	0
SMIM27	72.7637	-1.79817	0.0460459	-39.0518	0	0
NDUFB6	230.575	-2.0351	0.0426176	-47.7526	0	0
DNAJA1	413.022	-2.54539	0.06632	-38.3805	0	0
CHMP5	193.062	-2.13	0.0542052	-39.2951	0	0
AL162231.1	51.2451	-2.29215	0.0571946	-40.0763	0	0
VCP	298.852	-1.4782	0.0292207	-50.5876	0	0
STOML2	85.6902	-2.37838	0.0615188	-38.6611	0	0
CREB3	59.0966	-1.97788	0.0513402	-38.5249	0	0
HINT2	93.813	-2.7703	0.0641279	-43.1996	0	0
CLTA	429.778	-1.72767	0.0439829	-39.2805	0	0
ZCCHC7	943.204	0.778028	0.0206156	37.7397	0	0
GRHPR	113.203	-1.49324	0.0367089	-40.678	0	0
TOMM5	123.424	-2.43737	0.0642856	-37.9147	0	0
FAM122A	54.5516	-2.00245	0.0523259	-38.2689	0	0
HNRNPK	557.276	-1.73925	0.0436947	-39.8046	0	0
ANP32B	155.628	-1.43085	0.0367786	-38.9044	0	0
SEC61B	196.222	-2.06463	0.0429382	-48.0837	0	0
ATP6V1G1	398.603	-2.45424	0.0631112	-38.8876	0	0
NDUFA8	175.015	-2.35056	0.0574121	-40.9418	0	0
RBM18	51.1441	-1.60757	0.036599	-43.924	0	0
DENND1A	969.953	1.03221	0.0246863	41.8131	0	0
ARPC5L	94.6947	-2.04044	0.0517892	-39.3989	0	0
AK1	194.704	-2.6342	0.0667008	-39.4927	0	0
C9orf16	163.833	-2.50042	0.0631144	-39.6173	0	0
C9orf78	87.859	-2.22941	0.0428389	-52.0419	0	0
MRPS2	40.1601	-1.90811	0.0499538	-38.1975	0	0
SNHG7	144.041	-1.78862	0.0459863	-38.8945	0	0
PHPT1	184.91	-2.46797	0.062828	-39.2813	0	0
EDF1	380.962	-2.2739	0.0476298	-47.7411	0	0
PHYH	87.0613	-1.50884	0.0379516	-39.757	0	0
ZNF248	571.493	1.06232	0.0280478	37.8755	0	0
HNRNPF	239.642	-1.37126	0.0355129	-38.613	0	0
PCBD1	140.833	-2.60606	0.061521	-42.3605	0	0
FAM149B1	147.089	0.909701	0.0228023	39.8952	0	0
VDAC2	409.494	-2.18481	0.0579101	-37.7276	0	0
GHITM	357.397	-2.57448	0.0667742	-38.555	0	0
GOT1	391.432	-1.51683	0.0389295	-38.9634	0	0
MRPL43	111.831	-1.56472	0.0372544	-42.001	0	0
BTRC	545.197	0.876871	0.021797	40.2289	0	0
CUEDC2	157.556	-1.79833	0.0449253	-40.0294	0	0
BORCS7	148.209	-1.28912	0.0339192	-38.0056	0	0
AC022395.1	37.4935	2.82575	0.0725269	38.9614	0	0
PRDX3	116.433	-1.84977	0.0480784	-38.4741	0	0
BUB3	91.2669	-1.55874	0.0401343	-38.8382	0	0
OAT	182.023	-1.58766	0.0382141	-41.5464	0	0
AL731577.2	146.798	1.3473	0.0334142	40.3211	0	0
UROS	164.859	-1.25069	0.0305352	-40.9588	0	0
ECHS1	126.911	-2.00148	0.0515247	-38.8451	0	0
RIC8A	54.5186	-1.75858	0.0409356	-42.9597	0	0
TALDO1	138.612	-1.70113	0.0387806	-43.8655	0	0
RPLP2	869.37	-3.35368	0.0708231	-47.353	0	0
POLR2L	231.533	-3.47959	0.0661983	-52.5632	0	0
TOLLIP	96.6318	-1.53544	0.0399621	-38.4224	0	0
APBB1	169.727	-1.09543	0.0265488	-41.2611	0	0
ARFIP2	63.5815	-1.77036	0.0389801	-45.417	0	0
EIF3F	194.785	-2.12149	0.0513957	-41.2776	0	0
TMEM9B	136.162	-1.5586	0.0399241	-39.039	0	0
EIF4G2	308.989	-2.05985	0.0491929	-41.8728	0	0
TSG101	185.991	-0.841373	0.0202028	-41.6463	0	0
EIF3M	184.14	-1.06185	0.026719	-39.7413	0	0
COMMD9	61.7815	-1.35856	0.0323369	-42.0129	0	0
TTC17	686.702	0.862113	0.0216617	39.799	0	0
PHF21A	689.123	0.945919	0.0233705	40.4749	0	0
PSMC3	131.64	-2.44873	0.0550282	-44.4995	0	0
NDUFS3	141.639	-2.24342	0.0507242	-44.2277	0	0
KBTBD4	44.4629	-1.53579	0.0397721	-38.6147	0	0
SSRP1	59.2329	-1.63246	0.0412864	-39.5398	0	0
UBE2L6	44.6087	-2.43759	0.061595	-39.5745	0	0
MED19	89.4801	-1.53973	0.037251	-41.334	0	0
TMEM258	190.744	-2.52367	0.0574472	-43.9303	0	0
UBXN1	180.044	-1.86707	0.0434442	-42.9762	0	0
POLR2G	95.4841	-2.71628	0.058356	-46.5468	0	0
WDR74	41.3148	-1.93761	0.0508422	-38.1103	0	0
COX8A	494.612	-3.10222	0.0804162	-38.5771	0	0
BAD	106.355	-2.41418	0.0511201	-47.2256	0	0
TRMT112	219.634	-3.09757	0.0760907	-40.7089	0	0
ARL2	244.21	-2.49942	0.064713	-38.6232	0	0
SNX15	36.5205	-1.88491	0.0460891	-40.897	0	0
ZFPL1	56.0322	-1.61327	0.0404831	-39.8506	0	0
KAT5	123.973	-1.25853	0.0288217	-43.6662	0	0
CFL1	688.511	-3.10493	0.0670227	-46.3265	0	0
DRAP1	179.369	-2.26351	0.0527995	-42.8698	0	0
SART1	68.3849	-0.960938	0.025407	-37.8218	0	0
BANF1	159.497	-2.89875	0.0753252	-38.4831	0	0
SF3B2	293.989	-1.39405	0.0310847	-44.8468	0	0
BRMS1	32.823	-1.914	0.0431776	-44.3286	0	0
MRPL11	47.3909	-1.80961	0.0471367	-38.3907	0	0
PPP1CA	72.7124	-2.23299	0.0436571	-51.1485	0	0
CORO1B	47.6678	-1.70041	0.0443974	-38.2998	0	0
GSTP1	481.276	-2.77811	0.0739678	-37.5583	0	0
NDUFS8	231.02	-2.20742	0.0448555	-49.2119	0	0
PPP6R3	853.865	0.758411	0.0200429	37.8394	0	0
MRPL21	94.4692	-2.13363	0.0514797	-41.446	0	0
LAMTOR1	184.441	-2.20138	0.0550549	-39.9851	0	0
EMSY	291.62	0.970651	0.0251232	38.6356	0	0
CWC15	150.575	-1.77804	0.0416453	-42.6948	0	0
SRSF8	89.8344	-1.89621	0.0440686	-43.0285	0	0
ACAT1	212.076	-0.939489	0.0242206	-38.7888	0	0
TIMM8B	112.113	-2.229	0.053564	-41.6137	0	0
RPS25	962.589	-3.39472	0.087456	-38.8163	0	0
TBRG1	177.652	-1.35255	0.0248797	-54.3637	0	0
EI24	116.159	-1.88766	0.0410627	-45.9701	0	0
THYN1	76.4742	-1.57917	0.0352501	-44.799	0	0
MRPL51	127.162	-2.62235	0.0693805	-37.7967	0	0
COPS7A	106.225	-1.90756	0.0485306	-39.3064	0	0
MLF2	245.083	-1.89011	0.0372807	-50.6994	0	0
TPI1	1391.06	-3.19874	0.0774607	-41.295	0	0
C12orf57	193.501	-2.76779	0.0601638	-46.0043	0	0
STRAP	355.989	-1.65073	0.0334906	-49.2894	0	0
ETFRF1	143.275	-1.22524	0.0320165	-38.2689	0	0
ZCRB1	147.018	-1.66811	0.0400297	-41.6718	0	0
MCRS1	52.3064	-1.44797	0.0357535	-40.4987	0	0
DAZAP2	145.057	-1.88322	0.0388331	-48.4951	0	0
ATG101	41.1076	-2.52028	0.0637895	-39.5094	0	0
PRR13	84.3572	-2.56098	0.0603869	-42.4095	0	0
HNRNPA1	534.262	-2.91881	0.0687352	-42.4645	0	0
COPZ1	125.126	-1.75696	0.0427395	-41.1085	0	0
ZNF385A	359.026	-1.97743	0.0468772	-42.1832	0	0
RPS26	502.649	-3.11229	0.0782717	-39.7627	0	0
PA2G4	150.981	-2.22225	0.0448945	-49.4994	0	0
MYL6B	166.024	-1.6254	0.0397803	-40.8594	0	0
NABP2	54.7411	-2.15928	0.0459111	-47.0317	0	0
PTGES3	606.335	-2.05399	0.0449762	-45.6684	0	0
DCTN2	249.738	-1.59795	0.037446	-42.6734	0	0
OS9	186.409	-1.2573	0.030884	-40.7104	0	0
MON2	663.297	0.901843	0.0218578	41.2596	0	0
CCT2	160.192	-1.47649	0.0385336	-38.317	0	0
UBE2N	269.306	-1.27191	0.0323477	-39.32	0	0
NDUFA12	226.252	-2.07877	0.0543613	-38.2398	0	0
SNRPF	139.511	-1.78696	0.0428404	-41.712	0	0
PPP1CC	345.273	-1.46644	0.0377231	-38.8739	0	0
TRIAP1	19.8758	-2.67542	0.0654321	-40.8885	0	0
DYNLL1	399.575	-2.35443	0.0597126	-39.4294	0	0
PSMD9	112.311	-1.10576	0.0278462	-39.7095	0	0
ARL6IP4	293.208	-1.76044	0.041772	-42.1441	0	0
TMED2	154.256	-2.15802	0.057233	-37.7059	0	0
RAN	329.333	-2.77518	0.0684216	-40.56	0	0
IFT88	562.79	0.933243	0.0238828	39.076	0	0
SAP18	271.031	-2.70982	0.0704755	-38.4506	0	0
MRPL57	185.816	-2.08248	0.0482861	-43.1279	0	0
PAN3	691.949	0.979885	0.023121	42.3808	0	0
POMP	335.332	-2.3072	0.0492884	-46.8103	0	0
HMGB1	1175.85	-1.31071	0.0307071	-42.6841	0	0
WBP4	170.381	-1.14288	0.0288829	-39.5695	0	0
ESD	246.901	-1.63934	0.0392112	-41.808	0	0
COMMD6	208.788	-2.62409	0.0610426	-42.9878	0	0
RBM26	524.905	0.963021	0.0200351	48.0667	0	0
PCCA	753.982	1.01311	0.0261598	38.7278	0	0
TEX30	34.4476	-2.14122	0.0488437	-43.8381	0	0
ANKRD10	393.79	1.04587	0.0256374	40.7945	0	0
TUBGCP3	186.392	0.902435	0.0233147	38.7066	0	0
APEX1	122.802	-1.68879	0.0418937	-40.3113	0	0
OXA1L	71.0329	-1.96961	0.0432658	-45.5234	0	0
MRPL52	85.0729	-2.18857	0.0473402	-46.2307	0	0
PRMT5	33.8211	-1.75646	0.0399937	-43.9185	0	0
PSMB5	193.314	-2.49151	0.0469219	-53.099	0	0
C14orf119	76.5174	-2.51073	0.0539556	-46.5333	0	0
NGDN	81.9839	-1.22672	0.025078	-48.9161	0	0
DCAF11	77.7973	-1.35355	0.0324308	-41.7366	0	0
PSME1	108.339	-2.77805	0.0626806	-44.3208	0	0
NEDD8	336.83	-2.25609	0.0529203	-42.6319	0	0
GMPR2	52.8679	-1.85486	0.04853	-38.221	0	0
TINF2	41.697	-1.93317	0.0481418	-40.1558	0	0
RABGGTA	27.5302	-1.89972	0.0492887	-38.5427	0	0
SDR39U1	106.29	-1.52386	0.0373381	-40.8126	0	0
STRN3	513.844	1.0428	0.0183246	56.9072	0	0
EAPP	256.156	-1.25184	0.0228454	-54.7962	0	0
PSMA6	213.27	-1.1602	0.0290307	-39.9645	0	0
FKBP3	227.856	-1.71022	0.0420578	-40.6637	0	0
RPS29	976.867	-3.00595	0.0743647	-40.4217	0	0
ARF6	60.8544	-2.72298	0.0645221	-42.2023	0	0
TMEM260	160.518	0.967668	0.0252354	38.3456	0	0
KIAA0586	315.394	1.05036	0.0266786	39.3707	0	0
PIGH	132.35	-1.67154	0.0386249	-43.2763	0	0
VTI1B	168.323	-1.43139	0.0324662	-44.0887	0	0
ERH	336.956	-2.04105	0.049112	-41.5592	0	0
COX16	170.937	-1.50208	0.0362712	-41.4124	0	0
AC004816.1	34.3477	-1.44614	0.0353693	-40.8868	0	0
PCNX1	545.168	1.1502	0.0261917	43.9147	0	0
ERG28	131.187	-2.04249	0.0446447	-45.7498	0	0
AHSA1	162.292	-2.30292	0.056852	-40.5073	0	0
SLIRP	358.515	-1.6679	0.0394743	-42.2529	0	0
PSMC1	176.708	-1.38796	0.0364969	-38.0296	0	0
NDUFB1	367.269	-2.49304	0.0534181	-46.6703	0	0
EIF5	370.841	-1.80294	0.0360193	-50.0547	0	0
SIVA1	105.637	-1.91209	0.0414296	-46.1527	0	0
NUDT14	67.2274	-2.29516	0.0590805	-38.8481	0	0
EMC4	120.792	-2.86594	0.0486306	-58.9329	0	0
NOP10	90.7271	-3.04044	0.0751107	-40.4794	0	0
GOLGA8A	414.064	2.2893	0.0606215	37.7638	0	0
NDUFAF1	53.3901	-1.31595	0.0341524	-38.5317	0	0
PDIA3	312.277	-1.4639	0.0376706	-38.8604	0	0
SERF2	377.162	-2.7398	0.0725643	-37.7568	0	0
MFAP1	100.398	-1.2439	0.0323544	-38.4462	0	0
DUT	220.559	-1.63622	0.0404518	-40.4486	0	0
EID1	596.991	-2.71755	0.0571926	-47.5157	0	0
ARPP19	258.951	-1.70856	0.0407026	-41.9768	0	0
RSL24D1	209.293	-2.34865	0.0618097	-37.998	0	0
ZNF280D	483.161	1.23929	0.0276784	44.7744	0	0
POLR2M	36.9492	-1.8766	0.0476297	-39.3998	0	0
VPS13C	836.052	1.24643	0.0269462	46.2563	0	0
OAZ2	271.594	-2.17051	0.044825	-48.4218	0	0
RPL4	431.771	-3.63101	0.0768433	-47.2522	0	0
PKM	2541.83	-2.0323	0.0515356	-39.435	0	0
UBL7	34.5279	-2.248	0.0463685	-48.4813	0	0
COX5A	380.687	-2.40141	0.0565266	-42.4828	0	0
IMP3	76.824	-2.6615	0.0544248	-48.9024	0	0
PSMA4	164.599	-2.14693	0.0543945	-39.4697	0	0
MORF4L1	743.864	-1.99533	0.0431844	-46.2048	0	0
RPS17	476.574	-4.1773	0.096816	-43.1468	0	0
NGRN	419.894	-2.70865	0.0650479	-41.6408	0	0
POLR3K	33.5374	-2.30916	0.0563588	-40.9725	0	0
METTL26	95.1431	-2.10682	0.0553848	-38.0397	0	0
STUB1	228.121	-2.01879	0.0528237	-38.2175	0	0
UBE2I	156.34	-1.06441	0.024122	-44.126	0	0
NUBP2	76.1569	-1.58656	0.0380609	-41.6846	0	0
RNPS1	269.256	-1.04934	0.0219997	-47.6977	0	0
ELOB	414.409	-2.94555	0.0715587	-41.1628	0	0
RSL1D1	104.709	-2.07071	0.0412144	-50.2424	0	0
RPS15A	790.204	-3.17294	0.0736679	-43.0708	0	0
ARL6IP1	685.347	-2.49473	0.0623089	-40.0381	0	0
METTL9	165.975	-1.30609	0.0293335	-44.5256	0	0
UQCRC2	406.443	-0.845063	0.0222867	-37.9178	0	0
NSMCE1	91.2502	-1.54305	0.0347683	-44.381	0	0
TMEM219	110.317	-2.01201	0.0471617	-42.662	0	0
HIRIP3	56.7173	-1.80856	0.0451089	-40.0931	0	0
PPP4C	93.0122	-1.81108	0.034457	-52.5606	0	0
SEPHS2	68.894	-2.40161	0.0616332	-38.9662	0	0
BCKDK	36.6199	-1.89598	0.0500087	-37.9131	0	0
PHKB	416.325	1.07643	0.0239211	44.9992	0	0
AKTIP	116.848	-1.25042	0.031938	-39.1515	0	0
HERPUD1	282.024	-2.14462	0.0502296	-42.6963	0	0
ARL2BP	107.493	-2.02582	0.0400935	-50.5273	0	0
POLR2C	141.263	-1.86554	0.0348923	-53.4656	0	0
CFAP20	85.771	-2.00809	0.0390066	-51.4807	0	0
CNOT1	221.265	0.903829	0.0221049	40.8882	0	0
ATP6V0D1	193.196	-1.65078	0.0401288	-41.137	0	0
PSMD7	194.702	-1.4608	0.0328248	-44.5028	0	0
KARS	92.0858	-1.65874	0.0388732	-42.6706	0	0
PLCG2	78.7835	-5.02786	0.116761	-43.061	0	0
HSBP1	252.551	-2.55974	0.0616492	-41.521	0	0
COX4I1	925.141	-2.66836	0.0703831	-37.912	0	0
GLOD4	103.198	-1.30289	0.030947	-42.1006	0	0
YWHAE	723.303	-1.84112	0.033533	-54.9048	0	0
ITGAE	75.9712	-1.68767	0.0404534	-41.7189	0	0
PSMB6	180.369	-2.74088	0.0701607	-39.0658	0	0
SLC25A11	106.412	-2.01761	0.0525431	-38.3991	0	0
RNF167	120.114	-1.82585	0.0410939	-44.4312	0	0
PFN1	182.919	-3.5425	0.0711847	-49.7649	0	0
SPAG7	178.661	-1.91318	0.041508	-46.0919	0	0
AC012146.1	18.1805	-2.53208	0.0562518	-45.0133	0	0
RPAIN	180.081	-1.00664	0.0252383	-39.8852	0	0
RNASEK	443.025	-2.42924	0.0527996	-46.0087	0	0
C17orf49	77.5706	-2.26342	0.0587926	-38.4984	0	0
GABARAP	427.415	-3.20435	0.0688296	-46.5548	0	0
TMEM256	78.4773	-2.46426	0.0572346	-43.0554	0	0
EIF4A1	396.838	-1.74967	0.0384136	-45.5482	0	0
SOX15	46.8639	-2.07407	0.0498101	-41.6396	0	0
NAA38	350.355	-1.75625	0.0438967	-40.0087	0	0
TRAPPC1	190.42	-2.91933	0.0731758	-39.8947	0	0
VAMP2	1712.13	-2.67733	0.060661	-44.136	0	0
RANGRF	76.8823	-1.74744	0.0426293	-40.9916	0	0
UBB	1039.44	-3.42475	0.0828165	-41.3535	0	0
AC055811.1	24.9389	2.8269	0.0749088	37.7379	0	0
COPS3	106.077	-1.2607	0.0305315	-41.2916	0	0
TMEM11	74.496	-1.91741	0.043505	-44.0733	0	0
POLDIP2	85.433	-1.67982	0.0325445	-51.6163	0	0
TMEM199	46.9774	-1.37851	0.0359749	-38.3188	0	0
AC004253.1	54.9591	2.92021	0.0677543	43.0999	0	0
ZNHIT3	85.212	-1.74358	0.0401921	-43.3811	0	0
GGNBP2	246.759	-0.858196	0.0216151	-39.7035	0	0
PSMB3	172.136	-2.41813	0.0527168	-45.8703	0	0
MIEN1	103.439	-3.04695	0.0600403	-50.7484	0	0
EIF1	1626.05	-2.84294	0.0584387	-48.6482	0	0
NT5C3B	116.568	-1.39904	0.0343288	-40.754	0	0
NKIRAS2	42.5644	-1.54896	0.0394621	-39.2519	0	0
RAB5C	149.674	-2.02731	0.0375642	-53.9693	0	0
COASY	47.6449	-1.64665	0.0424234	-38.8146	0	0
COA3	100.168	-2.82445	0.0671431	-42.0661	0	0
PSME3	49.9675	-1.34445	0.0314827	-42.7043	0	0
RPL27	496.566	-3.22885	0.085231	-37.8835	0	0
HEXIM2	26.2269	-1.87005	0.0476853	-39.2165	0	0
MRPL10	63.215	-1.62465	0.0422723	-38.4329	0	0
CBX1	157.766	-1.45445	0.0326794	-44.5067	0	0
MRPL27	112.23	-1.84734	0.0417111	-44.2889	0	0
SUPT4H1	76.6535	-2.67141	0.0623848	-42.8215	0	0
MED13	502.602	0.805922	0.0212559	37.9153	0	0
KPNA2	60.4517	-1.98288	0.0466325	-42.5214	0	0
AMZ2	78.6639	-1.88368	0.0438885	-42.9198	0	0
PRKAR1A	335.692	-1.47588	0.037151	-39.7266	0	0
RPL38	679.361	-3.22167	0.0851973	-37.8142	0	0
SUMO2	521.037	-2.56956	0.0620774	-41.3929	0	0
MRPS7	134.631	-1.91627	0.0412634	-46.4399	0	0
SRP68	86.2924	-1.25893	0.0292407	-43.0542	0	0
ACTG1	1653.71	-2.22323	0.0587229	-37.8596	0	0
MRPL12	60.0891	-2.49835	0.0569531	-43.8668	0	0
ANAPC11	193.74	-2.90723	0.0683348	-42.544	0	0
CENPX	90.1561	-2.18238	0.0562788	-38.7779	0	0
DCXR	128.375	-2.41086	0.0586047	-41.1377	0	0
MYL12A	102.522	-2.45213	0.0593089	-41.3451	0	0
PPP4R1	205.931	0.977365	0.0244123	40.0357	0	0
CEP192	292.369	0.981541	0.0228094	43.0323	0	0
SNRPD1	146.629	-2.00765	0.0440077	-45.6203	0	0
TRAPPC8	309.285	1.20264	0.0214751	56.0015	0	0
ZSCAN30	91.267	1.1897	0.0294549	40.3906	0	0
TPGS2	133.246	-1.56521	0.0390481	-40.084	0	0
EPG5	205.049	0.88257	0.0216663	40.7346	0	0
IER3IP1	146.228	-1.82259	0.0442353	-41.2023	0	0
DYM	750.305	0.864464	0.0227249	38.0404	0	0
CNDP2	98.5312	-1.62539	0.0408619	-39.7776	0	0
POLR2E	140.895	-1.79141	0.0421422	-42.5087	0	0
GPX4	612.844	-2.38075	0.0633751	-37.5661	0	0
CIRBP	1424.87	-2.11988	0.0410774	-51.607	0	0
NDUFS7	219.409	-2.04985	0.0457115	-44.8433	0	0
GAMT	79.8195	-1.75316	0.0409313	-42.8317	0	0
UQCR11	454.498	-3.27193	0.0571166	-57.285	0	0
OAZ1	798.74	-2.57101	0.0625606	-41.0963	0	0
DOHH	35.4179	-2.05782	0.0540639	-38.0627	0	0
RPL36	767.811	-3.26262	0.0821147	-39.7325	0	0
NDUFA11	272.799	-2.39367	0.0556033	-43.0491	0	0
CLPP	74.7801	-1.78885	0.0381387	-46.9039	0	0
GTF2F1	88.619	-1.56116	0.0414836	-37.6332	0	0
NDUFA7	229.759	-2.38458	0.0593245	-40.1955	0	0
RPS28	1164.67	-3.0322	0.0787698	-38.4945	0	0
RAB11B	179.254	-2.03659	0.042776	-47.6106	0	0
UBL5	466.982	-3.17875	0.0749321	-42.4217	0	0
PIN1	247.414	-2.31255	0.0615111	-37.5956	0	0
EIF3G	110.435	-2.33364	0.0590379	-39.5278	0	0
MRPL4	90.1267	-1.40383	0.0357507	-39.2671	0	0
KEAP1	59.3935	-1.80221	0.0427799	-42.1274	0	0
ELOF1	64.4401	-2.1425	0.0506941	-42.2634	0	0
WDR83OS	159.223	-2.30562	0.0612389	-37.6496	0	0
DHPS	177.067	-1.71931	0.0405674	-42.3815	0	0
TRIR	273.331	-2.52812	0.0490819	-51.5081	0	0
FARSA	75.2319	-1.46665	0.035754	-41.0205	0	0
RAD23A	212.035	-1.76503	0.0356533	-49.5053	0	0
C19orf53	167.604	-3.05516	0.070169	-43.54	0	0
DNAJB1	333.172	-3.60454	0.0868439	-41.5059	0	0
TECR	471.269	-1.84685	0.0471605	-39.1609	0	0
NDUFB7	284.619	-2.72955	0.0690192	-39.5478	0	0
FAM32A	71.1888	-2.41591	0.0554186	-43.5938	0	0
USE1	64.2181	-1.49838	0.0380129	-39.4177	0	0
CCDC124	72.8647	-2.50907	0.0537614	-46.6704	0	0
MPV17L2	20.0421	-2.28973	0.0580091	-39.472	0	0
RAB3A	374.563	-3.09749	0.0741656	-41.7645	0	0
LSM4	175.243	-2.37092	0.0631774	-37.528	0	0
FKBP8	295.236	-2.28296	0.0495414	-46.0818	0	0
COPE	252.468	-2.10436	0.0464937	-45.2611	0	0
RFXANK	34.6139	-1.7484	0.0463429	-37.7274	0	0
UQCRFS1	245.498	-2.24473	0.0541201	-41.4767	0	0
POP4	46.9099	-2.14931	0.0501224	-42.8813	0	0
TMEM147	150.166	-2.42566	0.0637646	-38.0408	0	0
RBM42	58.0688	-2.37027	0.0492438	-48.1333	0	0
COX6B1	510.285	-2.71517	0.0637744	-42.5745	0	0
PSENEN	58.4896	-2.57245	0.0630504	-40.7998	0	0
LIN37	44.6522	-1.6095	0.0374656	-42.9595	0	0
POLR2I	149.825	-2.84922	0.0718891	-39.6336	0	0
TBCB	207.612	-2.47422	0.0443637	-55.7713	0	0
YIF1B	53.2332	-1.7777	0.0434982	-40.8684	0	0
PSMD8	210.787	-2.01682	0.050777	-39.7191	0	0
EIF3K	327.575	-1.69231	0.0413332	-40.9431	0	0
ECH1	93.9391	-2.08743	0.0473424	-44.0921	0	0
PAF1	40.127	-1.82821	0.0449682	-40.6557	0	0
MED29	74.6351	-1.60721	0.039445	-40.7455	0	0
FBL	58.4937	-1.98476	0.047536	-41.7527	0	0
PSMC4	114.789	-1.57264	0.0388932	-40.4347	0	0
ZNF780B	385.653	1.16741	0.0269559	43.3079	0	0
SERTAD1	47.7768	-4.06679	0.107111	-37.9682	0	0
SNRPA	48.0019	-1.64642	0.0437214	-37.6571	0	0
EGLN2	60.1017	-1.64291	0.04276	-38.4216	0	0
ZNF574	24.9735	-1.80074	0.0450665	-39.9575	0	0
DEDD2	56.0063	-2.4688	0.0569682	-43.3365	0	0
PAFAH1B3	79.882	-2.2891	0.0556833	-41.1092	0	0
ETHE1	40.5047	-1.47173	0.038214	-38.5129	0	0
ZNF428	212.035	-2.06481	0.0433222	-47.6617	0	0
SNRPD2	193.25	-3.24698	0.0577364	-56.2381	0	0
AP2S1	176.704	-2.56766	0.0671947	-38.2123	0	0
PPP1R15A	145.174	-3.52967	0.0853753	-41.343	0	0
RUVBL2	83.0258	-2.20686	0.0405892	-54.3706	0	0
PIH1D1	110.026	-1.37387	0.0353419	-38.8738	0	0
NOSIP	112.68	-1.46808	0.0325207	-45.1429	0	0
FUZ	34.3565	-1.66987	0.041814	-39.9356	0	0
AKT1S1	34.5146	-2.02815	0.0466163	-43.5072	0	0
PPP2R1A	291.564	-1.90417	0.0481653	-39.5341	0	0
NDUFA3	187.2	-2.77737	0.0662368	-41.931	0	0
TSEN34	74.6109	-2.13757	0.0437211	-48.8911	0	0
HSPBP1	41.0232	-2.03862	0.045568	-44.7379	0	0
RPL28	924.527	-2.81719	0.0648083	-43.4696	0	0
ISOC2	48.0983	-2.53574	0.0647762	-39.1462	0	0
ZNF580	78.5691	-1.99631	0.0510852	-39.0781	0	0
CCDC106	51.6854	-1.84122	0.047411	-38.8353	0	0
ZNF667-AS1	149.786	-1.72498	0.0374314	-46.0839	0	0
AC010642.2	40.4789	-2.04392	0.0529371	-38.6103	0	0
CHMP2A	173.487	-2.50691	0.0588858	-42.5724	0	0
PSMF1	169.26	-0.91062	0.023362	-38.9787	0	0
NSFL1C	165.376	-1.30154	0.0292299	-44.5278	0	0
SNRPB	95.6357	-2.00126	0.0518709	-38.5815	0	0
NOP56	101.779	-1.48197	0.0394849	-37.5325	0	0
IDH3B	107.127	-2.09184	0.0466159	-44.8739	0	0
TMEM230	296.275	-1.56524	0.0308273	-50.7745	0	0
SNRPB2	120.359	-2.1502	0.0423329	-50.7926	0	0
DSTN	599.09	-2.7262	0.0602595	-45.241	0	0
SMIM26	164.296	-2.66262	0.0664959	-40.0418	0	0
NAA20	144.289	-1.55763	0.0394412	-39.4924	0	0
NXT1	36.2535	-2.44118	0.0617157	-39.5553	0	0
APMAP	97.5279	-1.50891	0.0377335	-39.9887	0	0
PDRG1	41.0479	-1.73028	0.0460861	-37.5446	0	0
RALY	225.136	-1.49206	0.0317641	-46.9731	0	0
EIF2S2	225.104	-1.67848	0.038504	-43.5924	0	0
EIF6	73.9604	-2.24258	0.0563437	-39.8018	0	0
ERGIC3	112.031	-1.84936	0.036413	-50.7884	0	0
ROMO1	124.777	-3.13482	0.0698325	-44.8906	0	0
SCAND1	172.263	-2.48457	0.064938	-38.2607	0	0
MANBAL	78.0466	-2.18607	0.050099	-43.6351	0	0
MAFB	50.1416	-5.01478	0.12492	-40.1441	0	0
PCIF1	37.7743	-1.56627	0.0393053	-39.8488	0	0
ZFAS1	306.213	-2.18581	0.0440468	-49.6248	0	0
PFDN4	93.046	-2.05591	0.0510769	-40.2512	0	0
STX16	287.908	0.831374	0.0211322	39.3416	0	0
PSMA7	358.655	-2.3586	0.0494334	-47.7127	0	0
ADRM1	92.4231	-2.58779	0.0537311	-48.1618	0	0
PPDPF	330.393	-3.06088	0.0706113	-43.3483	0	0
SOD1	946.819	-3.02318	0.0792503	-38.1472	0	0
PAXBP1	370.211	1.30192	0.0319033	40.8082	0	0
BRWD1	711.26	0.795638	0.020442	38.9218	0	0
CSTB	254.675	-2.23222	0.0577376	-38.6614	0	0
SUMO3	145.806	-2.83437	0.0710309	-39.9033	0	0
ATP6V1E1	270.238	-1.92515	0.0492927	-39.0554	0	0
RANBP1	181.679	-1.94897	0.0463946	-42.0086	0	0
UBE2L3	182.587	-1.40167	0.0284412	-49.2833	0	0
SMARCB1	195.204	-1.41772	0.0269878	-52.5318	0	0
ZMAT5	47.2807	-1.66912	0.0391904	-42.59	0	0
TXN2	173.812	-2.09462	0.0493048	-42.4831	0	0
EIF3D	125.183	-1.42593	0.0303372	-47.0027	0	0
IFT27	116.65	-1.35861	0.0342753	-39.638	0	0
EIF3L	167.659	-1.94563	0.0347069	-56.0589	0	0
TOMM22	79.0036	-3.09166	0.0764184	-40.4569	0	0
RPS19BP1	159.095	-2.57573	0.0684022	-37.6557	0	0
ST13	410.221	-2.10472	0.0472728	-44.5228	0	0
RBX1	352.014	-1.62267	0.0374942	-43.2778	0	0
PHF5A	53.4039	-2.36346	0.0474433	-49.8166	0	0
PMM1	83.0634	-1.51035	0.0367936	-41.0492	0	0
XRCC6	304.709	-1.27996	0.0327346	-39.1012	0	0
SNU13	311.675	-2.50688	0.0521734	-48.049	0	0
NDUFA6	208.813	-2.54744	0.0613435	-41.5275	0	0
BRD1	136.16	1.5229	0.0357416	42.6087	0	0
RBBP7	135.861	-1.13196	0.0293345	-38.588	0	0
POLA1	278.174	1.11125	0.0276568	40.1801	0	0
MID1IP1	43.7362	-2.55898	0.0592486	-43.1905	0	0
USP11	287.443	-1.19675	0.0308333	-38.8134	0	0
UXT	92.3894	-2.31634	0.048767	-47.4981	0	0
PQBP1	104.768	-1.73334	0.0436915	-39.6723	0	0
TIMM17B	96.8078	-2.41333	0.050704	-47.5963	0	0
PRAF2	62.7767	-2.58798	0.0652826	-39.6428	0	0
GPKOW	36.005	-1.61307	0.0338189	-47.6972	0	0
HSD17B10	42.8228	-2.49562	0.0620927	-40.1919	0	0
TSR2	130.733	-2.4482	0.0536065	-45.6697	0	0
FAM104B	34.7778	-1.79377	0.0474111	-37.8344	0	0
MAGEH1	87.9303	-2.20115	0.0585866	-37.5709	0	0
NBDY	212.147	-1.20068	0.0315151	-38.0985	0	0
LINC01278	510.677	1.04509	0.027839	37.5407	0	0
IGBP1	131.765	-1.28077	0.0340251	-37.6421	0	0
PDZD11	70.2926	-2.65816	0.0555641	-47.8395	0	0
PIN4	144.765	-1.14728	0.0293654	-39.0691	0	0
FTX	3998.41	1.13122	0.0258674	43.7312	0	0
COX7B	424.616	-2.40468	0.063763	-37.7128	0	0
RPL36A	405.206	-3.55473	0.0791379	-44.9182	0	0
HNRNPH2	156.286	-2.05674	0.051339	-40.062	0	0
ARMCX1	62.8556	-1.83881	0.0481247	-38.2092	0	0
BEX5	114.61	-3.05512	0.0707111	-43.2056	0	0
LINC00630	95.8784	1.25601	0.0311659	40.3009	0	0
TCEAL8	130.706	-2.7633	0.0636793	-43.394	0	0
TCEAL9	201.174	-2.56013	0.0565545	-45.2685	0	0
BEX3	685.879	-2.29116	0.0559867	-40.9232	0	0
TCEAL4	265.709	-2.0962	0.0484979	-43.2225	0	0
TCEAL3	182.159	-2.04574	0.0538796	-37.9686	0	0
TCEAL1	64.1092	-2.00338	0.0423596	-47.2946	0	0
MORF4L2	434.536	-1.48921	0.0355156	-41.9312	0	0
SLC25A5	260.001	-2.73439	0.0700594	-39.0296	0	0
RNF113A	37.6329	-2.33527	0.0560156	-41.6896	0	0
NDUFA1	453.805	-2.93413	0.0677466	-43.3103	0	0
RBMX2	54.3522	-1.52835	0.0395558	-38.6377	0	0
IDH3G	101.895	-1.88223	0.0495893	-37.9564	0	0
NAA10	81.6978	-1.39879	0.0364171	-38.4102	0	0
LAGE3	80.7023	-2.78921	0.0596524	-46.7577	0	0
FUNDC2	143.708	-2.25294	0.0536429	-41.9989	0	0
VBP1	146.59	-2.36885	0.0524471	-45.1664	0	0
LACTB2	73.352	-1.24688	0.033234	-37.5181	4.66553e-308	1.02439e-306
ATXN1	1979.06	0.806395	0.0214986	37.5092	6.52618e-308	1.43119e-306
HTRA2	40.671	-1.64638	0.0439009	-37.5023	8.46428e-308	1.85398e-306
VPS4A	165.298	-1.21852	0.0325014	-37.4914	1.27228e-307	2.78341e-306
SMDT1	247.151	-2.52997	0.06749	-37.4865	1.52764e-307	3.33804e-306
OGT	262.423	1.07416	0.0286596	37.4801	1.94479e-307	4.24444e-306
DCTN3	199.431	-2.51896	0.0672179	-37.4745	2.39498e-307	5.22072e-306
RITA1	40.3727	-1.57488	0.0420256	-37.4743	2.41591e-307	5.26003e-306
LSM1	78.8034	-2.20143	0.0587464	-37.4735	2.49245e-307	5.42018e-306
RPL36AL	314.221	-3.11734	0.0831895	-37.4727	2.56147e-307	5.56362e-306
NTMT1	61.298	-1.45995	0.0389633	-37.4698	2.85828e-307	6.20091e-306
MED13L	1391.49	0.964495	0.0257534	37.4511	5.75941e-307	1.24799e-305
RPL8	986.671	-2.99523	0.0800085	-37.4364	1.00011e-306	2.16452e-305
PSMC5	188.02	-2.41754	0.0645778	-37.436	1.01425e-306	2.19251e-305
Z83843.1	66.7676	1.84704	0.0493476	37.4291	1.31316e-306	2.8353e-305
RPS5	639.663	-2.98076	0.0796515	-37.4225	1.68005e-306	3.62318e-305
PSMA2	169.891	-2.14589	0.0573534	-37.4152	2.20992e-306	4.76023e-305
TCEA2	151.282	-1.62051	0.0433156	-37.4117	2.51914e-306	5.41989e-305
NUCB1	138.355	-1.39371	0.0372606	-37.4045	3.29926e-306	7.0899e-305
PSMB7	269.803	-1.22033	0.0326252	-37.4045	3.30317e-306	7.08993e-305
MED31	98.3299	-1.35018	0.0361093	-37.3913	5.40109e-306	1.15792e-304
CCNY	586.679	0.817992	0.021877	37.3905	5.57161e-306	1.19307e-304
ZNF672	42.7988	-1.40159	0.0374873	-37.3884	6.03701e-306	1.28969e-304
SCYL1	87.3217	-1.20368	0.0321939	-37.3884	6.03323e-306	1.28969e-304
CFL2	157.672	-2.29194	0.0613034	-37.3869	6.38993e-306	1.36348e-304
SREK1IP1	155.987	-1.05855	0.0283275	-37.3684	1.2742e-305	2.71571e-304
RPL6	860.199	-3.03582	0.0812443	-37.3665	1.36625e-305	2.90849e-304
TEN1	22.6402	-1.92835	0.0516105	-37.3635	1.52832e-305	3.2497e-304
ABHD8	157.766	-1.10059	0.0294593	-37.3596	1.77316e-305	3.76588e-304
LENG1	30.5022	-2.01769	0.0540123	-37.3562	2.01365e-305	4.27166e-304
RPL37	643.45	-2.67541	0.0716194	-37.3559	2.03279e-305	4.30723e-304
AKIRIN2	139.835	-1.61716	0.0432935	-37.3533	2.23729e-305	4.73502e-304
EIF3J	190.502	-1.1447	0.0306526	-37.3443	3.14157e-305	6.64113e-304
LDHB	538.166	-2.50119	0.0669784	-37.3433	3.25928e-305	6.88196e-304
KMT2C	1186.74	0.792608	0.0212254	37.3425	3.35725e-305	7.0806e-304
C6orf47	27.833	-1.92024	0.0514386	-37.3307	5.21416e-305	1.09842e-303
STK16	31.3942	-1.71102	0.0458361	-37.329	5.55031e-305	1.16788e-303
TEX14	144.101	-3.21806	0.0862187	-37.3244	6.61083e-305	1.38942e-303
COPS4	196.1	-0.898488	0.0240808	-37.3115	1.07001e-304	2.24627e-303
WDR11	238.102	0.904218	0.0242453	37.2946	2.00928e-304	4.21323e-303
SVIP	112.086	-1.86905	0.0501164	-37.2942	2.04062e-304	4.27402e-303
DNAJC13	254.243	1.09466	0.0293574	37.2874	2.6236e-304	5.48873e-303
LRRC59	47.2242	-1.97889	0.0530745	-37.2852	2.85149e-304	5.95864e-303
FAM136A	53.8532	-1.7638	0.0473483	-37.2516	9.99911e-304	2.08707e-302
CISD2	171.31	-1.56476	0.042009	-37.2483	1.13014e-303	2.35619e-302
DOCK7	546.381	1.0573	0.0283877	37.2449	1.27907e-303	2.66362e-302
PAIP1	168.275	-1.08416	0.0291118	-37.2413	1.46375e-303	3.04474e-302
WBP11	149.377	-1.17471	0.0315495	-37.2338	1.93967e-303	4.03007e-302
CCT8	209.863	-1.57568	0.0423289	-37.2248	2.71126e-303	5.6268e-302
ADIPOR1	114.912	-1.59439	0.0428366	-37.2204	3.19563e-303	6.62447e-302
AL691403.1	80.3763	-3.35128	0.0900499	-37.2158	3.7861e-303	7.83956e-302
BAG1	150.435	-2.46587	0.0662588	-37.2158	3.79398e-303	7.84694e-302
DNTTIP2	54.0737	-1.61717	0.043456	-37.2139	4.06635e-303	8.40072e-302
AC040934.1	39.307	1.7395	0.0467658	37.196	7.93126e-303	1.63667e-301
HINT1	671.055	-2.52855	0.0679912	-37.1894	1.01281e-302	2.08762e-301
NECAP1	169.255	-1.10109	0.029612	-37.184	1.23922e-302	2.55141e-301
ARID2	563.897	0.745643	0.0200686	37.1548	3.67222e-302	7.55214e-301
AURKAIP1	246.74	-2.55093	0.0686948	-37.1343	7.86784e-302	1.61624e-300
SELENOF	304.963	-1.12416	0.0302979	-37.1037	2.45023e-301	5.02768e-300
DDX54	52.9251	-1.35777	0.0365966	-37.1008	2.72322e-301	5.58152e-300
CHMP3	190.801	-1.19821	0.0322987	-37.0979	3.04019e-301	6.22416e-300
TTC21B	253.673	0.929791	0.025066	37.0937	3.5501e-301	7.25994e-300
HIKESHI	161.142	-1.14592	0.0308927	-37.0936	3.56853e-301	7.28942e-300
FLYWCH2	113.366	-1.62394	0.0437811	-37.0923	3.73853e-301	7.62811e-300
RPS13	983.503	-3.24564	0.0875183	-37.0853	4.85268e-301	9.89032e-300
COX7A2L	439.151	-2.08605	0.0562554	-37.0818	5.51584e-301	1.12293e-299
FAM13A-AS1	148.307	1.54853	0.0417687	37.0739	7.3878e-301	1.50235e-299
IMPDH2	46.8819	-2.0049	0.054089	-37.0667	9.68079e-301	1.96644e-299
PPP1R8	56.2336	-1.47508	0.0397969	-37.0651	1.02495e-300	2.07963e-299
DDX56	50.5131	-1.15049	0.0310429	-37.0613	1.18214e-300	2.39591e-299
RGS2	102.838	-3.63737	0.0982165	-37.0342	3.22115e-300	6.52121e-299
TRAPPC11	158.409	0.984059	0.0265721	37.0336	3.29898e-300	6.67136e-299
AC016876.1	13.5763	-2.41402	0.065212	-37.0181	5.85696e-300	1.18311e-298
KCTD5	43.2641	-1.51156	0.0408443	-37.0078	8.59122e-300	1.7335e-298
NUTF2	55.2866	-1.63712	0.0442391	-37.0062	9.09547e-300	1.83321e-298
DCTPP1	49.9632	-2.5006	0.0675824	-37.0009	1.10954e-299	2.23383e-298
TCEA1	283.605	-0.959703	0.0259452	-36.9896	1.68048e-299	3.37956e-298
PSMD6	91.2845	-1.44071	0.0389617	-36.9777	2.61731e-299	5.25775e-298
DCTN6	107.946	-1.97057	0.0532911	-36.9775	2.63788e-299	5.29323e-298
AC099791.2	59.5418	2.07486	0.0561402	36.9586	5.30201e-299	1.06274e-297
DDA1	52.3861	-1.50643	0.0407642	-36.9547	6.12672e-299	1.22669e-297
CLASP1	1506.71	0.912627	0.0247087	36.9354	1.25042e-298	2.50083e-297
DPM2	64.7049	-1.5928	0.0431248	-36.9346	1.28565e-298	2.56848e-297
MIR4458HG	54.4748	-2.08352	0.0564116	-36.9342	1.30611e-298	2.60649e-297
PFDN5	516.062	-2.38349	0.0645569	-36.9208	2.14075e-298	4.26742e-297
CHMP4B	128.082	-1.81231	0.0490928	-36.916	2.555e-298	5.08762e-297
LARP7	178.839	-1.13369	0.0307199	-36.9042	3.95599e-298	7.8687e-297
MRPL49	39.7369	-1.86094	0.0504365	-36.8966	5.24442e-298	1.04201e-296
MRPL28	85.5489	-2.00468	0.0543378	-36.8929	6.01048e-298	1.19291e-296
LOH12CR2	12.7896	-2.31161	0.0626597	-36.8914	6.34167e-298	1.25727e-296
FBXW4	263.191	0.962829	0.0261006	36.8892	6.89219e-298	1.36492e-296
TOMM6	188.154	-2.52628	0.0685051	-36.8773	1.06849e-297	2.11373e-296
AKIRIN1	153.897	-1.03771	0.028142	-36.8739	1.21273e-297	2.39646e-296
BLOC1S2	101.296	-1.74206	0.0472595	-36.8616	1.90845e-297	3.76716e-296
SHPRH	629.363	0.872228	0.0236634	36.8598	2.03699e-297	4.01654e-296
DNAJB2	172.279	-1.4061	0.0381486	-36.8585	2.14014e-297	4.21536e-296
EXOC6B	1006.44	0.86364	0.0234317	36.8577	2.19818e-297	4.32499e-296
STAU1	241.257	-0.705238	0.0191379	-36.8502	2.89831e-297	5.69636e-296
SLC25A4	538.417	-2.10563	0.0571412	-36.8496	2.96529e-297	5.8217e-296
RPS14	1235.44	-3.18752	0.0865127	-36.8445	3.57991e-297	7.02079e-296
NR1H2	128.672	-1.52529	0.0414023	-36.8407	4.11905e-297	8.06943e-296
TRPT1	41.7786	-1.71469	0.0465522	-36.8337	5.329e-297	1.04285e-295
MTM1	136.431	0.943012	0.0256027	36.8325	5.56706e-297	1.08827e-295
ARF4	235.708	-1.27351	0.0345829	-36.8249	7.37198e-297	1.43956e-295
FAAP20	108.295	-1.55374	0.042215	-36.8055	1.51024e-296	2.94594e-295
CETN2	87.0157	-2.82055	0.0766527	-36.7965	2.10072e-296	4.09336e-295
CDK13	745.374	0.765053	0.020793	36.7938	2.31825e-296	4.508e-295
TIMM13	117.033	-2.17067	0.0589956	-36.7938	2.31847e-296	4.508e-295
NDUFAF4	88.8901	-1.6708	0.0454225	-36.7835	3.39333e-296	6.59089e-295
ARPC5	102.517	-1.62345	0.0441467	-36.7741	4.79434e-296	9.30214e-295
ATM	578.563	0.840926	0.0228689	36.7716	5.24795e-296	1.01714e-294
RRAGA	117.025	-2.05511	0.0559273	-36.746	1.34564e-295	2.60529e-294
VPS28	219.772	-1.58827	0.0432246	-36.7444	1.42654e-295	2.759e-294
DYRK1A	785.656	0.96003	0.0261313	36.7386	1.76581e-295	3.41152e-294
POLR2F	169.945	-1.18567	0.0322748	-36.7366	1.9018e-295	3.67035e-294
MAGED2	202.145	-1.79035	0.0487419	-36.7313	2.31153e-295	4.45638e-294
MLLT10	781.351	0.882639	0.0240395	36.7162	4.02872e-295	7.7587e-294
PLPBP	73.0635	-1.14772	0.0312667	-36.7074	5.56936e-295	1.07144e-293
TXN	185.965	-2.54922	0.0694648	-36.6981	7.83888e-295	1.50646e-293
CLPTM1	151.186	-1.22494	0.0333801	-36.6968	8.22708e-295	1.57939e-293
RPL19	919.377	-3.09758	0.0844608	-36.6747	1.8458e-294	3.53973e-293
ZNF736	179.208	1.28925	0.0351595	36.6687	2.3042e-294	4.41416e-293
EEF2	616.99	-2.59069	0.0706571	-36.6657	2.5769e-294	4.93137e-293
SNRNP25	70.0412	-2.57119	0.0701494	-36.6531	4.08392e-294	7.80711e-293
PIK3C3	302.556	0.839091	0.0229047	36.634	8.22272e-294	1.57026e-292
SLC39A6	115.167	-1.39551	0.0380935	-36.6338	8.28976e-294	1.5814e-292
AHCY	51.5787	-1.73237	0.0472914	-36.6317	8.94904e-294	1.70538e-292
VPS54	430.318	0.917991	0.0250615	36.6295	9.70165e-294	1.84687e-292
BCAS2	284.723	-2.03317	0.0555092	-36.6276	1.039e-293	1.97585e-292
HCCS	22.5275	-2.19338	0.0598856	-36.6262	1.09557e-293	2.08124e-292
NDUFS6	229.666	-2.17951	0.0595121	-36.623	1.23208e-293	2.33812e-292
DGCR6L	56.5067	-2.24552	0.0613202	-36.6196	1.39298e-293	2.64071e-292
CHD6	623.982	0.690332	0.0188525	36.6176	1.50071e-293	2.84198e-292
SRP14	951.539	-2.74843	0.0750588	-36.617	1.53261e-293	2.89936e-292
DDX41	45.2877	-1.80823	0.0493868	-36.6137	1.73423e-293	3.27738e-292
CYB5R1	84.1125	-1.56366	0.0427078	-36.613	1.77898e-293	3.35845e-292
COX6C	798.958	-2.92215	0.0798281	-36.6055	2.33823e-293	4.40965e-292
TBPL1	115.89	-1.20848	0.0330155	-36.6035	2.51715e-293	4.74215e-292
PSMD3	134.708	-1.16858	0.0319281	-36.6005	2.80704e-293	5.28281e-292
TUBB	367.55	-2.82711	0.0772481	-36.5979	3.093e-293	5.81497e-292
STMN1	695.854	-2.40916	0.0658561	-36.5822	5.49581e-293	1.03217e-291
ZNF622	56.4495	-1.91886	0.0524542	-36.5816	5.60974e-293	1.05248e-291
FMC1	116.212	-2.16993	0.0593352	-36.5707	8.36271e-293	1.56736e-291
SEC61G	210.898	-2.6917	0.0736297	-36.5573	1.36695e-292	2.55933e-291
UQCRH	628.381	-2.32354	0.0635701	-36.5508	1.7316e-292	3.23873e-291
AP1M1	88.3011	-0.926184	0.0253406	-36.5493	1.8275e-292	3.41459e-291
MCRIP1	152.498	-1.77978	0.0487173	-36.5327	3.35791e-292	6.26764e-291
ZMAT2	91.3517	-2.2684	0.0620998	-36.5282	3.95537e-292	7.37524e-291
RNGTT	424.025	0.924724	0.0253212	36.5197	5.39631e-292	1.00517e-290
AIP	84.1504	-2.2357	0.0612263	-36.5154	6.31293e-292	1.17471e-290
HMOX2	171.022	-1.39555	0.0382283	-36.5056	9.03311e-292	1.67916e-290
FEM1A	21.979	-1.40707	0.038553	-36.4969	1.24007e-291	2.3028e-290
HEXIM1	72.3075	-2.09102	0.0573007	-36.4921	1.47985e-291	2.74527e-290
HELZ	576.978	0.757774	0.0207659	36.4913	1.52222e-291	2.821e-290
ANAPC15	74.0311	-1.71085	0.0468855	-36.49	1.59617e-291	2.95503e-290
LSM7	109.939	-1.81392	0.0497254	-36.4787	2.41178e-291	4.46044e-290
MYL6	861.31	-2.12031	0.0581302	-36.4752	2.74411e-291	5.06992e-290
SPATA6	399.721	1.00402	0.0275268	36.4742	2.84379e-291	5.24874e-290
EEF1E1	98.0009	-1.6227	0.044491	-36.4726	3.01526e-291	5.55957e-290
PYCR2	66.1418	-1.76077	0.0482999	-36.4549	5.76233e-291	1.06139e-289
BLOC1S1	182.212	-2.25749	0.0619337	-36.4501	6.86003e-291	1.2623e-289
POLR1D	165.062	-1.27095	0.0348684	-36.4498	6.9383e-291	1.27541e-289
OCIAD1-AS1	27.4003	2.45502	0.0673727	36.4394	1.01134e-290	1.85718e-289
MRPS24	165.939	-2.66633	0.0732023	-36.4241	1.76668e-290	3.24099e-289
RFK	96.5258	-2.30686	0.0633794	-36.3976	4.64741e-290	8.51712e-289
ORMDL3	40.0068	-1.815	0.0498713	-36.3937	5.3512e-290	9.79706e-289
PTOV1	211.961	-1.1983	0.0329305	-36.3889	6.381e-290	1.16707e-288
FRG1	141.316	-1.34561	0.036979	-36.3885	6.47256e-290	1.18263e-288
NPM1	415.845	-2.30886	0.063454	-36.3863	7.00028e-290	1.27776e-288
CBR1	74.3547	-2.12682	0.0584546	-36.3841	7.59004e-290	1.38402e-288
CNIH1	182.452	-1.27773	0.0351193	-36.3825	8.06091e-290	1.46841e-288
CD2BP2	54.6167	-1.60241	0.0440492	-36.3776	9.62662e-290	1.75187e-288
NEIL2	71.4791	-1.82485	0.0501674	-36.3753	1.04805e-289	1.90535e-288
RPL12	617.612	-3.21564	0.0884134	-36.3705	1.24745e-289	2.26559e-288
AFDN	718.761	0.95578	0.0262914	36.3533	2.33331e-289	4.2335e-288
GPANK1	67.6676	-1.20643	0.0331866	-36.3529	2.36246e-289	4.28211e-288
SELENOH	173.541	-1.85705	0.0510902	-36.3485	2.7735e-289	5.02213e-288
XBP1	117.902	-2.2045	0.0606514	-36.347	2.92691e-289	5.29465e-288
GABARAPL2	691.249	-2.59914	0.0715137	-36.3447	3.18839e-289	5.76193e-288
SRBD1	188.336	1.05407	0.0290143	36.3294	5.55477e-289	1.00284e-287
PICALM	717.602	0.837002	0.023041	36.3266	6.15734e-289	1.11052e-287
DMAC2	63.1272	-1.60759	0.044261	-36.3207	7.63438e-289	1.37555e-287
MAD2L1BP	31.8183	-1.88773	0.051986	-36.3122	1.04016e-288	1.87229e-287
NDUFS5	407.065	-2.77952	0.0765629	-36.3038	1.40969e-288	2.53494e-287
RPS19	884.728	-2.92115	0.0804679	-36.3021	1.49949e-288	2.69374e-287
PNRC2	91.4249	-2.20818	0.0608476	-36.2904	2.29395e-288	4.11689e-287
ACTR1A	125.464	-1.2952	0.0357163	-36.2636	6.07235e-288	1.08871e-286
SMIM20	73.5755	-1.88526	0.0519954	-36.2582	7.37591e-288	1.32112e-286
MBD5	1611.87	0.892043	0.0246084	36.2495	1.01283e-287	1.81233e-286
MORN2	69.258	-2.05335	0.056648	-36.2476	1.08298e-287	1.93595e-286
BSG	850.61	-1.7627	0.0486398	-36.24	1.42918e-287	2.55231e-286
KDELR1	109.908	-1.5748	0.0434584	-36.237	1.59458e-287	2.8449e-286
RPS3	951.146	-2.81233	0.077623	-36.2307	2.00312e-287	3.57027e-286
B4GALT3	32.3348	-1.77741	0.0490592	-36.2299	2.06014e-287	3.66831e-286
RHEB	525.167	-1.61884	0.0446867	-36.2264	2.33666e-287	4.1566e-286
AKT3	1487.48	0.852591	0.0235423	36.2153	3.49126e-287	6.20441e-286
SS18L2	98.448	-1.40259	0.0387338	-36.2111	4.07172e-287	7.2289e-286
GDI1	236.925	-1.63862	0.0452651	-36.2006	5.96423e-287	1.05785e-285
ZNF32	81.1921	-1.37935	0.0381057	-36.1981	6.52398e-287	1.156e-285
EFCAB13	151.768	1.70106	0.0469999	36.1929	7.88001e-287	1.39492e-285
SNHG6	526.249	-2.12823	0.0588186	-36.1828	1.13358e-286	2.00472e-285
POLD4	60.1287	-1.65704	0.0458014	-36.1788	1.31342e-286	2.32051e-285
MAP7D1	118.028	-1.49685	0.0413758	-36.1769	1.40503e-286	2.47995e-285
BTG1	1040.75	-2.011	0.0555979	-36.1704	1.77681e-286	3.13312e-285
EEF1G	664.3	-3.35523	0.0927624	-36.1701	1.79554e-286	3.16308e-285
C11orf1	49.8961	-1.66659	0.0460831	-36.1648	2.17448e-286	3.82692e-285
INTS2	153.614	0.905451	0.0250369	36.1646	2.19475e-286	3.85885e-285
FBXW8	130.57	1.1011	0.0304493	36.1617	2.43689e-286	4.28045e-285
NUDT2	86.6193	-1.3017	0.0359991	-36.1593	2.65869e-286	4.66553e-285
ATE1	530.955	0.782209	0.0216394	36.1474	4.08971e-286	7.1698e-285
SNAP29	81.6018	-0.928429	0.0256857	-36.1457	4.34401e-286	7.6083e-285
CYTH2	85.6973	-1.24644	0.0344855	-36.1437	4.66835e-286	8.16849e-285
YEATS4	79.4028	-1.44941	0.0401014	-36.1437	4.67285e-286	8.1685e-285
TMED3	60.5318	-1.76377	0.0488206	-36.1275	8.38092e-286	1.46364e-284
SF3B4	38.5918	-1.66845	0.0461898	-36.1216	1.03883e-285	1.81247e-284
DDX17	1570.13	0.867844	0.024026	36.1211	1.0577e-285	1.84362e-284
MAGEF1	111.745	-1.91664	0.0530818	-36.1073	1.74211e-285	3.03367e-284
CEP44	140.655	0.895403	0.0247987	36.1069	1.76908e-285	3.07769e-284
GAPDH	6188.45	-2.80774	0.0778021	-36.0882	3.46779e-285	6.0272e-284
MPC1	297.312	-1.18193	0.0327524	-36.0868	3.65581e-285	6.34791e-284
TSSC4	54.7321	-1.98394	0.0549779	-36.0861	3.74987e-285	6.50502e-284
ZNF771	45.5389	-1.41359	0.0391868	-36.073	6.00359e-285	1.04047e-283
SEC24B	464.997	0.880195	0.024404	36.0677	7.29396e-285	1.2629e-283
NIPBL	841.429	0.67573	0.0187486	36.0416	1.86431e-284	3.22485e-283
C12orf29	52.384	-1.57204	0.0436207	-36.0389	2.06055e-284	3.56091e-283
PSMA1	276.396	-1.19599	0.0331885	-36.0363	2.26003e-284	3.90193e-283
RPL37A	1355.72	-2.91253	0.080827	-36.0342	2.44123e-284	4.21078e-283
SELENOW	573.691	-1.77357	0.0492356	-36.0222	3.76077e-284	6.48064e-283
TM2D2	59.3267	-2.15932	0.0599517	-36.0176	4.43338e-284	7.63247e-283
ALKBH7	152.076	-2.42639	0.0673731	-36.0142	5.01484e-284	8.62533e-283
FKBP4	179.109	-2.41751	0.0671284	-36.0132	5.20342e-284	8.94123e-283
UCK1	43.9958	-1.67213	0.0464437	-36.0034	7.41269e-284	1.27255e-282
FTH1	4567	-3.1368	0.0871545	-35.9912	1.14769e-283	1.9684e-282
TUFM	218.27	-1.6786	0.0466431	-35.9883	1.27726e-283	2.18856e-282
CLTB	510.875	-2.14703	0.0596596	-35.988	1.28852e-283	2.20578e-282
P4HB	181.391	-1.34652	0.0374213	-35.9828	1.55345e-283	2.6568e-282
MAP1LC3A	342.45	-1.60683	0.0446668	-35.9736	2.16408e-283	3.69765e-282
GADD45GIP1	163.15	-2.78891	0.0775504	-35.9626	3.21398e-283	5.48641e-282
AC010976.1	94.5405	1.94073	0.0539714	35.9585	3.72317e-283	6.34964e-282
VPS25	68.7876	-2.06325	0.0573814	-35.9569	3.95459e-283	6.73799e-282
ZCCHC10	120.433	-0.932016	0.0259224	-35.9541	4.36341e-283	7.4276e-282
THAP1	28.8988	-1.90182	0.0529249	-35.9343	8.88884e-283	1.51168e-281
ARL3	587.047	-1.11613	0.0310607	-35.9339	9.03571e-283	1.53523e-281
NOP53	214.369	-2.56849	0.0714787	-35.9336	9.13883e-283	1.5513e-281
CDKN2AIPNL	73.9861	-1.70686	0.0475018	-35.9325	9.48912e-283	1.60926e-281
TPMT	73.917	-1.18183	0.0328912	-35.9314	9.86534e-283	1.6715e-281
VPS13A	346.242	0.936755	0.0260711	35.9308	1.01113e-282	1.71157e-281
URM1	71.1087	-1.11867	0.0311579	-35.9032	2.7257e-282	4.6096e-281
DPH3	41.2154	-1.71856	0.0478723	-35.8989	3.17807e-282	5.36964e-281
TTN-AS1	232.216	1.13845	0.0317183	35.8925	4.00217e-282	6.75575e-281
AC108449.1	58.214	2.36484	0.0658998	35.8854	5.16347e-282	8.70797e-281
MPDU1	63.1655	-1.50053	0.0418169	-35.8834	5.55385e-282	9.35765e-281
JPT1	93.0956	-1.91415	0.0533502	-35.879	6.49196e-282	1.09281e-280
THOC7	200.599	-1.39218	0.0388047	-35.8766	7.0816e-282	1.19097e-280
BABAM1	122.166	-1.14138	0.0318203	-35.8697	9.08302e-282	1.52615e-280
TMED9	152.34	-1.96049	0.0546636	-35.8647	1.08596e-281	1.82297e-280
RIDA	48.9846	-1.5509	0.0432433	-35.8645	1.09483e-281	1.83617e-280
CHCHD10	521.94	-1.99312	0.055581	-35.8597	1.29861e-281	2.17592e-280
SMIM7	220.153	-0.85592	0.0238688	-35.8593	1.31864e-281	2.20745e-280
IFI6	110.086	-2.59534	0.0724138	-35.8404	2.59154e-281	4.33433e-280
EBNA1BP2	74.5082	-2.07548	0.0579308	-35.827	4.20293e-281	7.02291e-280
ENO1	1423.31	-2.09067	0.0583588	-35.8244	4.60653e-281	7.69025e-280
PCBP2	455.052	-1.1197	0.031256	-35.8234	4.78099e-281	7.97416e-280
MRPL36	69.7739	-2.30051	0.0642238	-35.8202	5.35013e-281	8.91526e-280
FAU	865.382	-2.90971	0.0812678	-35.804	9.56882e-281	1.59305e-279
MYL12B	250.131	-2.47634	0.0692226	-35.7737	2.8366e-280	4.71815e-279
NRF1	409.765	0.853958	0.0238832	35.7556	5.41249e-280	8.99443e-279
EP400	260.226	0.747328	0.0209018	35.7542	5.6921e-280	9.45044e-279
ERAL1	42.8321	-1.32242	0.036994	-35.7469	7.39744e-280	1.22706e-278
CLDN20	39.3927	2.31456	0.0647613	35.7398	9.53338e-280	1.57992e-278
ABCA5	855.225	0.825416	0.0230966	35.7376	1.03254e-279	1.70962e-278
C11orf71	50.5236	-1.80901	0.0506234	-35.7347	1.14337e-279	1.89139e-278
PSAP	937.513	-1.91418	0.0535717	-35.7311	1.29953e-279	2.14776e-278
RPS27L	152.238	-1.5198	0.0425516	-35.7166	2.18382e-279	3.60598e-278
NOA1	33.8503	-1.09778	0.0307366	-35.7157	2.25601e-279	3.7218e-278
RPL10	1659.26	-2.99651	0.0838993	-35.7155	2.26969e-279	3.74098e-278
MYDGF	99.0662	-1.67262	0.0468375	-35.7111	2.65768e-279	4.37651e-278
MZT2B	306.101	-2.30642	0.0645899	-35.7087	2.89474e-279	4.76256e-278
NFKBIB	46.4869	-1.48184	0.0415053	-35.7024	3.62757e-279	5.96287e-278
PRADC1	48.5702	-1.78387	0.0499664	-35.7015	3.7495e-279	6.15771e-278
NCOA1	1789.9	0.806602	0.0225975	35.6942	4.85509e-279	7.9662e-278
RPS21	499.804	-2.78169	0.0779607	-35.6806	7.89866e-279	1.29484e-277
U47924.2	6.30791	-2.37791	0.0666778	-35.6627	1.49905e-278	2.4552e-277
RPE	112.438	1.16843	0.0327655	35.6604	1.6281e-278	2.66417e-277
SBDS	203.118	-2.31964	0.0650493	-35.6598	1.66184e-278	2.71692e-277
PPIL1	44.0827	-1.72835	0.0484703	-35.6579	1.78047e-278	2.90825e-277
ATG2B	205.315	1.04154	0.0292106	35.6562	1.88549e-278	3.07704e-277
SELENOT	276.401	-1.67275	0.0469141	-35.6557	1.92476e-278	3.13831e-277
C1orf122	228.168	-1.80047	0.0504973	-35.6547	1.98955e-278	3.24103e-277
CEP350	504.329	0.665169	0.0186631	35.641	3.25234e-278	5.29343e-277
MRPS11	96.2609	-1.02893	0.0288744	-35.6346	4.08337e-278	6.64004e-277
MRPS33	83.8021	-2.15609	0.060512	-35.6309	4.6644e-278	7.57809e-277
NEU1	77.7965	-2.00115	0.0561666	-35.6289	5.00835e-278	8.12962e-277
PDIA6	199.897	-1.39871	0.0392584	-35.6282	5.13298e-278	8.3245e-277
SNX12	43.762	-1.69259	0.0475139	-35.623	6.16224e-278	9.9848e-277
RHOB	232.988	-2.64516	0.0742916	-35.6051	1.16712e-277	1.88943e-276
RPL13	1614.13	-2.7347	0.076816	-35.6007	1.36848e-277	2.21344e-276
TACO1	36.3364	-1.60007	0.0449596	-35.5892	2.06161e-277	3.33156e-276
EPB41L4A-AS1	123.187	-1.8403	0.0517122	-35.5874	2.1969e-277	3.54704e-276
MRPL47	82.7196	-1.76168	0.0495032	-35.5873	2.20617e-277	3.55885e-276
CTSA	125.775	-1.51643	0.0426119	-35.5871	2.21684e-277	3.57288e-276
STX5	146.864	-0.949322	0.0266837	-35.5769	3.19071e-277	5.13792e-276
SVBP	64.6011	-1.87634	0.052744	-35.5745	3.4742e-277	5.58947e-276
RNH1	244.967	-1.27582	0.0358834	-35.5547	7.03945e-277	1.13154e-275
RBM22	71.6445	-1.32795	0.0373571	-35.5475	9.06852e-277	1.45641e-275
MTDH	671.154	-0.670661	0.0188736	-35.5343	1.45085e-276	2.32801e-275
PFKM	191.275	-1.48424	0.0417752	-35.5291	1.74492e-276	2.79741e-275
MRPS34	116.137	-1.93144	0.0543688	-35.5249	2.02912e-276	3.25017e-275
NOLC1	63.4458	-1.44028	0.0405617	-35.5084	3.65196e-276	5.84443e-275
MRPL13	88.5369	-1.48844	0.0419497	-35.4816	9.4399e-276	1.50939e-274
BEX2	480.382	-1.48388	0.0418286	-35.4752	1.18448e-275	1.89226e-274
NR2C2	236.797	0.677198	0.0190967	35.4615	1.93134e-275	3.08268e-274
NUDT16	49.4851	-1.51793	0.0428072	-35.4596	2.06427e-275	3.29197e-274
OTUB1	102.09	-1.32022	0.0372356	-35.4558	2.35723e-275	3.75587e-274
RPN2	208.458	-1.18581	0.0334454	-35.455	2.42755e-275	3.86452e-274
TSN	106.643	-1.11213	0.0313783	-35.4428	3.74793e-275	5.96128e-274
SNHG5	285.409	-1.56318	0.0441116	-35.4369	4.61182e-275	7.32892e-274
AKIP1	69.1565	-1.18458	0.0334319	-35.4325	5.39682e-275	8.56893e-274
C6orf136	89.0326	-1.14933	0.0324388	-35.4306	5.77013e-275	9.15366e-274
TXNDC17	62.4038	-2.30969	0.0651975	-35.426	6.78647e-275	1.07566e-273
ATP9B	558.997	0.823331	0.0232539	35.4061	1.3742e-274	2.17621e-273
POP7	63.8082	-2.64883	0.0748646	-35.3815	3.28242e-274	5.19359e-273
C19orf81	50.9554	-1.75611	0.0496472	-35.3718	4.62879e-274	7.31751e-273
MSRB1	15.8193	-2.54045	0.0718235	-35.3707	4.82335e-274	7.61847e-273
BEX4	428.911	-1.64382	0.0464814	-35.3651	5.88144e-274	9.28164e-273
NUCKS1	773.421	-1.14174	0.032285	-35.3644	6.01552e-274	9.48501e-273
SMAD4	201.287	0.842312	0.0238218	35.3589	7.32913e-274	1.15462e-272
PLEKHB2	232.711	-1.31271	0.0371266	-35.3577	7.63571e-274	1.20188e-272
HEXB	120.501	-1.13207	0.0320225	-35.3521	9.2965e-274	1.46203e-272
CSDE1	394.177	-1.18827	0.0336151	-35.3493	1.02804e-273	1.61537e-272
SSNA1	104.355	-1.87334	0.0530028	-35.3441	1.23475e-273	1.93849e-272
PCBP1	180.586	-2.24664	0.0635888	-35.3307	1.98205e-273	3.10903e-272
CHIC1	183.458	0.891205	0.0252269	35.3276	2.21476e-273	3.47106e-272
CETN3	106.549	-1.59254	0.0450881	-35.3208	2.82058e-273	4.41672e-272
UBE2J1	159.806	-0.940726	0.026644	-35.3072	4.55231e-273	7.12229e-272
G6PD	51.2297	-1.58588	0.0449345	-35.2933	7.44687e-273	1.16409e-271
MYCBP2	984.287	0.714663	0.0202773	35.2444	4.1797e-272	6.52809e-271
RPL21	1855.69	-3.38588	0.0960746	-35.2422	4.52355e-272	7.05907e-271
OCEL1	45.9411	-1.79544	0.0509465	-35.2417	4.59894e-272	7.17056e-271
AP001767.3	41.0733	2.35213	0.0667657	35.2296	7.04513e-272	1.09752e-270
SWI5	110.154	-1.15191	0.0326985	-35.2281	7.43808e-272	1.15774e-270
BIRC6	1328.62	0.7855	0.0222991	35.2257	8.07962e-272	1.25652e-270
PIGX	130.435	-0.994712	0.0282402	-35.2232	8.8226e-272	1.3709e-270
YIPF2	73.0492	-1.15465	0.0327816	-35.2226	9.03181e-272	1.40221e-270
FER	896.157	0.967127	0.0274596	35.22	9.88956e-272	1.53406e-270
ATRAID	119.104	-2.0872	0.0592713	-35.2143	1.20729e-271	1.87114e-270
MAGIX	14.2356	-1.78386	0.0506649	-35.209	1.45525e-271	2.25354e-270
DYNLRB1	320.984	-2.52491	0.0717257	-35.2024	1.83835e-271	2.84435e-270
GADD45A	75.4076	-2.92253	0.0830338	-35.1969	2.22851e-271	3.4451e-270
PSMG3	48.5097	-1.98758	0.0564778	-35.1922	2.63635e-271	4.07212e-270
UFD1	81.9827	-1.11126	0.0315788	-35.19	2.84229e-271	4.38649e-270
ACTR10	293.954	-0.818652	0.0232652	-35.1878	3.06809e-271	4.73095e-270
CDC37L1	131.52	-0.912366	0.0259304	-35.1852	3.3637e-271	5.18238e-270
BCAP31	153.437	-2.10641	0.0598761	-35.1795	4.12124e-271	6.34412e-270
ORC3	294.086	0.802175	0.022803	35.1784	4.27626e-271	6.5772e-270
AC008443.5	36.29	-2.31253	0.06576	-35.1662	6.58356e-271	1.01174e-269
UGP2	226.034	-1.23856	0.035227	-35.1595	8.33053e-271	1.27913e-269
CA11	169.715	-1.43945	0.0409456	-35.1551	9.7089e-271	1.48952e-269
AC007566.1	158.1	1.26791	0.0360707	35.1507	1.13542e-270	1.74047e-269
CDKN2AIP	40.9536	-1.84796	0.0525921	-35.1377	1.79393e-270	2.74757e-269
AP000857.2	138.743	2.64868	0.0753917	35.1322	2.17265e-270	3.32481e-269
ARMC8	358.745	0.587498	0.016724	35.1291	2.42753e-270	3.71173e-269
SETD2	530.134	0.688443	0.0196033	35.1187	3.49264e-270	5.33582e-269
H2AFZ	403.459	-2.43918	0.0694563	-35.1182	3.56232e-270	5.4377e-269
PHAX	109.063	-1.49624	0.0426069	-35.1174	3.65842e-270	5.57971e-269
MRPL58	48.0167	-1.41351	0.0402717	-35.0994	6.89026e-270	1.05e-268
FUNDC1	76.2111	-2.35138	0.0669954	-35.0976	7.33924e-270	1.11748e-268
AC093495.1	21.7087	2.5008	0.0712929	35.0779	1.4667e-269	2.23135e-268
WDPCP	925.259	0.878688	0.0250634	35.0586	2.88222e-269	4.38117e-268
RPL41	2191.17	-3.56493	0.101693	-35.0558	3.17743e-269	4.82587e-268
DDIT3	320.613	-2.2356	0.0637767	-35.0535	3.44595e-269	5.22934e-268
SLC35B1	70.8929	-1.19266	0.0340264	-35.051	3.76543e-269	5.70938e-268
ACD	40.0642	-1.5154	0.0432367	-35.0488	4.06469e-269	6.15801e-268
JUN	1041.01	-3.22721	0.0920865	-35.0454	4.5844e-269	6.93958e-268
STIP1	173.767	-2.04891	0.0585025	-35.0226	1.01859e-268	1.54059e-267
C20orf27	43.9184	-1.98776	0.0567784	-35.009	1.63946e-268	2.47758e-267
RTTN	189.842	1.02619	0.029314	35.0068	1.77199e-268	2.67564e-267
AC026704.1	95.946	1.90239	0.054365	34.9929	2.88087e-268	4.34641e-267
PSMD10	40.2702	-2.36756	0.0676686	-34.9876	3.47506e-268	5.23853e-267
PRDX5	522.636	-3.09375	0.0884411	-34.9809	4.3914e-268	6.61438e-267
PLD3	469.731	-0.971964	0.0277859	-34.9804	4.46485e-268	6.71945e-267
PHB2	96.8671	-1.77485	0.0507413	-34.9783	4.8063e-268	7.22734e-267
AC018521.5	49.2039	-2.5369	0.0725398	-34.9726	5.87133e-268	8.82155e-267
IDH3A	172.932	-0.888053	0.0254046	-34.9564	1.03509e-267	1.55391e-266
XRN1	550.951	0.773394	0.0221253	34.9551	1.08195e-267	1.62292e-266
MPV17	94.1408	-1.07014	0.0306319	-34.9356	2.14198e-267	3.21032e-266
PTMA	1865.86	-2.75224	0.0787827	-34.9346	2.22001e-267	3.32453e-266
RCOR3	371.04	0.806767	0.0230941	34.9339	2.27024e-267	3.39695e-266
SDHAF1	43.1735	-2.16013	0.0618425	-34.9296	2.64271e-267	3.95102e-266
NFKBIE	9.44459	-2.73103	0.0781873	-34.9293	2.66881e-267	3.98677e-266
PEBP1	1732.95	-2.53691	0.0726314	-34.9286	2.7407e-267	4.0908e-266
PRELID3B	28.1662	-2.16788	0.062067	-34.9281	2.78431e-267	4.15249e-266
MRFAP1	352.235	-2.61914	0.0749974	-34.9231	3.31914e-267	4.94606e-266
TRAPPC2L	73.5859	-2.3356	0.066883	-34.9207	3.60473e-267	5.36724e-266
NARS	253.052	-1.31599	0.0376861	-34.9197	3.73017e-267	5.54946e-266
PAM16	111.268	-1.1533	0.0330351	-34.9112	5.01977e-267	7.46193e-266
SQSTM1	563.7	-1.55317	0.0444996	-34.903	6.69083e-267	9.93785e-266
KIAA1143	65.4317	-1.52413	0.0436705	-34.9006	7.27452e-267	1.0796e-265
DPM1	132.375	-0.82079	0.0235211	-34.8958	8.59951e-267	1.2752e-265
ERP29	254.117	-1.82211	0.0522162	-34.8955	8.69689e-267	1.28859e-265
AKR1A1	92.6565	-1.26704	0.0363157	-34.8894	1.07479e-266	1.59118e-265
C15orf61	120.863	-1.87714	0.0538316	-34.8707	2.07043e-266	3.06269e-265
TMEM126B	128.143	-1.30432	0.0374223	-34.8541	3.68411e-266	5.44529e-265
MRPL22	90.8593	-1.28994	0.0370138	-34.8502	4.22234e-266	6.23576e-265
RNF41	83.6779	-1.07065	0.0307219	-34.8498	4.29376e-266	6.33609e-265
UBQLN2	75.5522	-1.79293	0.0514489	-34.8487	4.46071e-266	6.57711e-265
MDP1	66.8039	-1.6474	0.0472757	-34.8466	4.79782e-266	7.06843e-265
BOLA2	29.5937	-2.679	0.076917	-34.8297	8.6265e-266	1.26988e-264
PRKCSH	87.0565	-1.37608	0.0395255	-34.8151	1.43723e-265	2.11399e-264
ZNF334	89.7942	1.20128	0.0345134	34.8061	1.9668e-265	2.89058e-264
GPHN	3267.17	0.922004	0.0264974	34.796	2.79582e-265	4.10566e-264
KRT10	160.787	-2.13994	0.0615057	-34.7925	3.15663e-265	4.63176e-264
TRIM52-AS1	47.0386	-1.57752	0.0453414	-34.792	3.21684e-265	4.7163e-264
RPL11	1182.86	-2.67417	0.0768704	-34.7881	3.68644e-265	5.40045e-264
RAB2A	599.516	-0.728649	0.0209491	-34.7818	4.57967e-265	6.70358e-264
MZT2A	161.877	-1.8688	0.0537304	-34.7811	4.69509e-265	6.867e-264
ZMYM2	815.308	0.629249	0.0181066	34.7524	1.27701e-264	1.86625e-263
ALKBH5	245.573	-1.40668	0.0404815	-34.7486	1.45323e-264	2.12206e-263
FGFR1OP	231.999	0.807049	0.0232337	34.7362	2.24012e-264	3.26849e-263
FIS1	176.96	-2.44754	0.0704619	-34.7356	2.28422e-264	3.33016e-263
BTF3L4	175.619	-0.91506	0.0263534	-34.7226	3.58942e-264	5.22882e-263
RPL35	799.195	-3.08638	0.0888931	-34.7202	3.91053e-264	5.69204e-263
AC091133.1	20.1272	2.31193	0.0666229	34.7017	7.42534e-264	1.07994e-262
POLE3	37.9811	-1.89596	0.0546402	-34.6989	8.1784e-264	1.18852e-262
PET100	194.875	-2.45037	0.0706234	-34.6963	8.95883e-264	1.30089e-262
HSPD1	398.08	-1.83729	0.0529677	-34.687	1.23878e-263	1.79737e-262
TBCK	468.031	0.849474	0.0244902	34.6863	1.26948e-263	1.84044e-262
RPL22	705.38	-2.52394	0.0727698	-34.6839	1.37702e-263	1.99475e-262
AL133243.2	19.5904	1.87568	0.0540871	34.6789	1.64135e-263	2.37578e-262
CDK5RAP2	211.611	0.841501	0.0242676	34.6759	1.81617e-263	2.62673e-262
AL118556.1	13.7982	3.36061	0.0969213	34.6736	1.96851e-263	2.8448e-262
GFER	25.8084	-1.60621	0.0463275	-34.6707	2.17927e-263	3.14687e-262
MPC2	188.709	-2.15358	0.0621169	-34.6698	2.24948e-263	3.24567e-262
AVPI1	120.365	-2.09629	0.0604715	-34.6658	2.58053e-263	3.72038e-262
AC087241.2	10.537	-3.49395	0.100799	-34.6625	2.89935e-263	4.17672e-262
PRPF19	93.8861	-1.5476	0.0446517	-34.6593	3.23929e-263	4.66274e-262
TMEM50A	180.616	-1.41315	0.0407774	-34.6552	3.7346e-263	5.37145e-262
TSPAN3	481.329	-1.50707	0.0434897	-34.6535	3.95895e-263	5.68962e-262
ABCF2	44.3511	-1.21841	0.0351646	-34.6489	4.64444e-263	6.6695e-262
CCDC93	259.262	0.823196	0.0237625	34.6427	5.7619e-263	8.26767e-262
MRPS35	109.549	-1.018	0.029388	-34.6401	6.29121e-263	9.02005e-262
C2CD5	419.805	1.01846	0.0294102	34.6295	9.09461e-263	1.30292e-261
TERF2IP	904.645	-1.46938	0.0424318	-34.6292	9.19578e-263	1.31637e-261
RPS20	505.462	-2.8035	0.0809749	-34.6219	1.18298e-262	1.6921e-261
RAB5A	211.545	-0.720974	0.0208277	-34.6162	1.44323e-262	2.06273e-261
CHID1	98.7288	-1.3153	0.0380015	-34.6118	1.67662e-262	2.39442e-261
PRDX4	83.6569	-1.89479	0.054752	-34.6068	1.99644e-262	2.84892e-261
PSMC2	170.457	-0.944518	0.0272956	-34.6033	2.25149e-262	3.21036e-261
RPL10A	540.239	-2.93402	0.0847941	-34.6017	2.38463e-262	3.39754e-261
PLEKHA3	181.585	-1.16131	0.0335795	-34.5839	4.41541e-262	6.28599e-261
PDCD5	171.333	-1.45487	0.0420786	-34.5751	5.97538e-262	8.50019e-261
ISCU	184.136	-2.24481	0.0649285	-34.5736	6.31025e-262	8.96953e-261
THAP7	52.9299	-1.79933	0.0520477	-34.5708	6.94748e-262	9.86759e-261
TMUB1	44.9581	-1.60312	0.0463769	-34.5672	7.85753e-262	1.11514e-260
MANF	78.7357	-2.09149	0.060514	-34.5621	9.38523e-262	1.33092e-260
ZNF587	82.1992	1.02958	0.0297969	34.5534	1.26932e-261	1.79862e-260
HERC4	637.263	0.849514	0.024596	34.5388	2.10271e-261	2.97721e-260
RPL7	1172.11	-3.722	0.107769	-34.537	2.23665e-261	3.16438e-260
PRELID1	145.09	-2.52367	0.073154	-34.4981	8.57538e-261	1.21229e-259
FAM3A	68.4297	-1.26334	0.0366481	-34.472	2.10645e-260	2.97555e-259
MRPL3	125.016	-0.924057	0.0268099	-34.4671	2.50064e-260	3.52963e-259
UGDH	102.447	-1.77999	0.0516643	-34.453	4.05987e-260	5.72602e-259
AC064852.1	17.3145	2.49213	0.0723782	34.432	8.38139e-260	1.18119e-258
MRPS12	48.2249	-2.21353	0.0642976	-34.4264	1.0168e-259	1.43187e-258
MSS51	22.4787	1.48033	0.0430166	34.4129	1.61794e-259	2.27664e-258
BPGM	56.1546	-1.86717	0.0542747	-34.4023	2.33293e-259	3.28018e-258
PNMA1	131.416	-1.93275	0.0561818	-34.4017	2.37662e-259	3.33902e-258
GORASP2	136.195	-0.934413	0.0271747	-34.3854	4.16524e-259	5.84741e-258
MAT2B	74.9638	-1.65132	0.0480489	-34.3676	7.69036e-259	1.07879e-257
DCAF13	55.938	-1.23244	0.0358678	-34.3607	9.74818e-259	1.3664e-257
ARPC3	213.703	-1.44366	0.0420213	-34.3553	1.17192e-258	1.6414e-257
ATF4	255.14	-2.40346	0.0699713	-34.3492	1.44544e-258	2.02295e-257
ZNF407	334.73	1.14469	0.033331	34.3432	1.78226e-258	2.49243e-257
CDC42	392.143	-1.22866	0.0357777	-34.3415	1.88959e-258	2.64048e-257
GDI2	313.526	-0.982136	0.0286018	-34.3383	2.10898e-258	2.9448e-257
KTI12	14.2185	-2.29238	0.0667588	-34.3382	2.11235e-258	2.94724e-257
CIAPIN1	94.0903	-1.19504	0.0348178	-34.3228	3.5834e-258	4.99588e-257
YIPF5	84.9232	-1.37406	0.0400417	-34.3158	4.56538e-258	6.36004e-257
NDUFB8	660.053	-1.3879	0.0404458	-34.315	4.69305e-258	6.5329e-257
FBXL15	108.153	-1.72739	0.0503393	-34.3149	4.70492e-258	6.54442e-257
C8orf33	95.6677	-1.5023	0.0437822	-34.3131	5.0126e-258	6.96705e-257
SLC30A6	138.203	0.790984	0.023057	34.3056	6.48253e-258	9.00324e-257
PSPC1	555.11	0.858509	0.025032	34.2964	8.871e-258	1.23111e-256
TNKS	804.233	0.896429	0.0261403	34.293	9.97082e-258	1.38268e-256
RPS15	1433.3	-3.3392	0.0973867	-34.288	1.18441e-257	1.6412e-256
COA6	51.1653	-1.93301	0.0563822	-34.284	1.36063e-257	1.88395e-256
CMAS	112.44	-1.48239	0.0432423	-34.2811	1.50237e-257	2.07862e-256
EMC6	93.5414	-2.2687	0.0661819	-34.2797	1.57421e-257	2.17636e-256
ELP5	92.2586	-1.18197	0.0344886	-34.2713	2.09962e-257	2.90054e-256
RPS4X	846.313	-3.22974	0.0942494	-34.2681	2.34851e-257	3.24191e-256
BCLAF3	132.5	0.937042	0.0273541	34.256	3.55288e-257	4.90071e-256
ETFB	170.924	-2.17308	0.0634449	-34.2515	4.14419e-257	5.712e-256
RTL8A	104.575	-1.98556	0.0579763	-34.2478	4.71019e-257	6.48722e-256
TOB2	226.116	-1.26057	0.0368138	-34.2418	5.77255e-257	7.94435e-256
PET117	44.5102	-1.81685	0.0530599	-34.2416	5.8194e-257	8.00277e-256
HCFC1R1	149.166	-2.20336	0.0643486	-34.2409	5.95391e-257	8.18156e-256
MIR3936HG	382.787	0.922753	0.0269523	34.2366	6.91444e-257	9.4943e-256
NDUFB11	231.759	-2.68064	0.0783009	-34.2351	7.27065e-257	9.97588e-256
TCF12	1156.21	0.864028	0.0252426	34.229	8.96891e-257	1.22967e-255
ALKBH2	22.7196	-1.75525	0.0512908	-34.2216	1.15349e-256	1.58028e-255
UTP11	43.7955	-1.42306	0.041588	-34.2181	1.30184e-256	1.78219e-255
GSK3B	956.444	0.617758	0.0180608	34.2044	2.07733e-256	2.84167e-255
COA5	86.4428	-1.50808	0.0441152	-34.1851	4.02583e-256	5.50298e-255
METTL23	62.8593	-1.22215	0.0357518	-34.1844	4.1277e-256	5.63798e-255
ARL5A	221.513	-1.08521	0.0317503	-34.1796	4.85714e-256	6.62934e-255
LZIC	115.398	-0.805644	0.023578	-34.1693	6.91605e-256	9.43239e-255
PGAM1	786.267	-2.13217	0.0624073	-34.1654	7.90462e-256	1.07726e-254
RPS12	1235.95	-3.02628	0.0885833	-34.1631	8.55301e-256	1.16475e-254
MNAT1	645.803	0.672841	0.0197047	34.1462	1.52071e-255	2.06936e-254
CHP1	125.535	-1.05223	0.0308191	-34.1422	1.74396e-255	2.37137e-254
CHMP2B	121.58	-1.5262	0.0447088	-34.1365	2.12208e-255	2.88337e-254
RPL23A	912.163	-3.27625	0.0959816	-34.1341	2.29918e-255	3.12166e-254
RPS27	1353.93	-3.24221	0.0949897	-34.1322	2.45768e-255	3.33438e-254
FTL	2224.72	-2.94654	0.0863362	-34.1287	2.77327e-255	3.75974e-254
EEF1A1	2731.2	-3.25927	0.0955289	-34.1181	3.97619e-255	5.38653e-254
HSPA8	783.159	-2.81446	0.0825085	-34.1111	5.04391e-255	6.82787e-254
NUDT16L1	87.8883	-1.46429	0.0429322	-34.107	5.81044e-255	7.85966e-254
CHRNB1	22.252	-1.59109	0.0466501	-34.1069	5.83369e-255	7.88524e-254
HSPA6	266.096	-8.089	0.237204	-34.1014	7.03831e-255	9.50642e-254
PPIA	580.307	-2.59742	0.0761807	-34.0955	8.61169e-255	1.16229e-253
BZW1	147.51	-1.50813	0.0442366	-34.0924	9.55987e-255	1.28931e-253
PPIE	89.8303	-1.30365	0.0382414	-34.0899	1.04208e-254	1.40437e-253
ARPC4	84.6281	-1.34397	0.0394481	-34.0693	2.1031e-254	2.83218e-253
COX14	204.127	-2.54055	0.0745763	-34.0664	2.32246e-254	3.12526e-253
SCOC	324.266	-2.22847	0.0654246	-34.0617	2.72704e-254	3.66699e-253
INO80E	55.9265	-1.17035	0.0343681	-34.0535	3.60555e-254	4.84471e-253
JOSD2	48.4191	-1.85506	0.0544764	-34.0524	3.73462e-254	5.01443e-253
PCGF1	18.5807	-2.08137	0.0611317	-34.0474	4.4422e-254	5.96009e-253
HTATSF1	99.6419	-1.78634	0.0524723	-34.0435	5.06223e-254	6.78697e-253
EHMT1	496.303	0.763423	0.0224268	34.0407	5.57773e-254	7.4726e-253
DMAP1	71.8935	-1.20726	0.0354683	-34.0378	6.15346e-254	8.23785e-253
ZNF678	80.0489	0.994017	0.0292048	34.0361	6.52302e-254	8.72615e-253
EIF4G3	1316.37	0.812168	0.0238627	34.035	6.77119e-254	9.05149e-253
AC004039.1	171.124	1.95611	0.0574751	34.034	6.99681e-254	9.34621e-253
BEX1	647.353	-2.38461	0.0700666	-34.0335	7.1146e-254	9.49658e-253
CNPPD1	39.5999	-1.51066	0.0443911	-34.0306	7.86585e-254	1.04916e-252
NUDT15	30.4339	-2.23122	0.0655866	-34.0195	1.14755e-253	1.5295e-252
POGZ	707.535	0.713229	0.0209772	34.0003	2.20744e-253	2.94002e-252
ATL2	229.896	0.788932	0.0232058	33.9972	2.44858e-253	3.25879e-252
WBP2	340.38	-1.70004	0.0500126	-33.9924	2.88998e-253	3.84345e-252
POLR1E	19.7019	-1.54837	0.0455523	-33.9911	3.01571e-253	4.00773e-252
H2AFY	449.128	-1.01974	0.0300041	-33.9867	3.4996e-253	4.64739e-252
NDFIP1	1203.26	-0.843291	0.0248146	-33.9836	3.88916e-253	5.16095e-252
RABGGTB	119.95	-1.66256	0.04894	-33.9713	5.91368e-253	7.84177e-252
UQCR10	448.302	-2.69014	0.079197	-33.9677	6.67925e-253	8.85049e-252
ARFGEF1	806.519	0.687435	0.0202417	33.9613	8.30498e-253	1.09967e-251
RRNAD1	64.393	-0.914493	0.0269283	-33.9603	8.5995e-253	1.13784e-251
YDJC	20.8246	-1.76216	0.0518941	-33.9569	9.65935e-253	1.27714e-251
TAF1	315.864	0.834703	0.024584	33.9531	1.0989e-252	1.45189e-251
DAXX	25.7188	-1.65189	0.0486589	-33.9484	1.28793e-252	1.70041e-251
EIF4H	252.524	-1.68189	0.049548	-33.9448	1.45764e-252	1.92307e-251
ATXN2	771.1	0.731375	0.0215462	33.9444	1.47359e-252	1.9427e-251
RPL14	713.709	-2.63237	0.0775526	-33.9431	1.54333e-252	2.03318e-251
LIN7B	101.463	-1.57155	0.0463052	-33.9389	1.77847e-252	2.34125e-251
ZBTB20-AS2	54.5353	2.07856	0.0612736	33.9227	3.08476e-252	4.05795e-251
DENND6A	242.963	0.817701	0.0241077	33.9186	3.54304e-252	4.65744e-251
RAB35	60.9364	-1.22283	0.0360588	-33.9122	4.41017e-252	5.79312e-251
C11orf58	603.037	-0.843106	0.0248635	-33.9094	4.84748e-252	6.36297e-251
BSCL2	351.84	-1.49569	0.0441175	-33.9025	6.11919e-252	8.02647e-251
RPS6KC1	377.961	0.805443	0.0237578	33.9022	6.17913e-252	8.09925e-251
NAPA	343.528	-1.35058	0.0398477	-33.8937	8.26194e-252	1.08215e-250
TPGS1	67.2818	-1.96921	0.0581047	-33.8907	9.14322e-252	1.19672e-250
CENPBD1	19.4424	-1.69639	0.0500741	-33.8776	1.42225e-251	1.86018e-250
ARL16	80.495	-1.23067	0.0363271	-33.8773	1.43945e-251	1.88132e-250
PARG	246.723	1.00402	0.0296399	33.8739	1.61537e-251	2.10973e-250
GDE1	55.4238	-1.71516	0.0506347	-33.8733	1.64742e-251	2.15004e-250
BMPR1A	582.683	0.766917	0.0226462	33.8652	2.16929e-251	2.8291e-250
AC093010.3	12.24	27.2893	0.805843	33.8643	2.23499e-251	2.9127e-250
PJA1	35.4526	-2.00301	0.0591526	-33.8617	2.44064e-251	3.17843e-250
MTRNR2L8	35.8819	-6.37983	0.18844	-33.856	2.95686e-251	3.84794e-250
DNTTIP1	89.8863	-0.961248	0.0284047	-33.8412	4.88917e-251	6.35803e-250
CCT3	307.979	-1.47746	0.0436798	-33.8248	8.52497e-251	1.10782e-249
MRPL40	78.5803	-2.30746	0.0682392	-33.8143	1.21585e-250	1.57886e-249
DNAAF2	52.5778	-1.34723	0.0398498	-33.8077	1.52121e-250	1.97399e-249
DMAC1	92.8113	-2.35811	0.0697507	-33.8076	1.52393e-250	1.9761e-249
FAM177A1	185.168	-0.939801	0.0278049	-33.7999	1.9822e-250	2.56853e-249
DHRS7	202.439	-1.48405	0.0439228	-33.7877	2.98779e-250	3.8688e-249
DNAJC4	57.6921	-1.41469	0.0418747	-33.7839	3.40313e-250	4.40348e-249
EIF1AX	330.115	-1.80412	0.0534119	-33.7776	4.20803e-250	5.44111e-249
KLHDC9	45.1831	-1.54405	0.045719	-33.7725	4.99239e-250	6.45072e-249
PHB	105.523	-2.11278	0.0625785	-33.7621	7.09654e-250	9.163e-249
MLLT11	255.506	-2.61876	0.0775769	-33.7569	8.45448e-250	1.09086e-248
H1F0	112.102	-2.46631	0.0730664	-33.7543	9.2338e-250	1.19057e-248
SURF6	49.3762	-1.27002	0.0376305	-33.7497	1.08068e-249	1.3924e-248
SUPT3H	784.286	0.970965	0.0287705	33.7487	1.11803e-249	1.43951e-248
PRKN	1406.92	0.886997	0.0262847	33.7457	1.23418e-249	1.58793e-248
MLST8	62.847	-1.4038	0.0416024	-33.7432	1.3456e-249	1.73006e-248
PUM2	920.671	0.683117	0.0202446	33.7431	1.35012e-249	1.73464e-248
MAP3K4	254.788	0.794988	0.0235652	33.7357	1.7306e-249	2.22192e-248
RPL32	1226.14	-3.23004	0.0958099	-33.713	3.72601e-249	4.78044e-248
MRPL44	44.0309	-1.78137	0.0528435	-33.7103	4.08861e-249	5.24196e-248
AL353759.1	33.0843	-3.51767	0.104357	-33.7081	4.4008e-249	5.63823e-248
NMT1	290.01	-1.01724	0.0301859	-33.6991	5.96686e-249	7.63926e-248
SLC25A3	512.413	-1.98969	0.0590444	-33.6981	6.15471e-249	7.87422e-248
CCDC180	77.8401	1.10518	0.0327986	33.696	6.62229e-249	8.46647e-248
IFI27L2	182.242	-2.62651	0.0779681	-33.687	8.9723e-249	1.14629e-247
C4orf3	336.669	-2.32608	0.0690695	-33.6774	1.2369e-248	1.57913e-247
SCMH1	849.336	0.835735	0.0248187	33.6735	1.41088e-248	1.79999e-247
HSPB6	26.0168	-2.75179	0.0817365	-33.6667	1.77926e-248	2.26837e-247
NOL7	200.756	-1.47094	0.0436949	-33.664	1.94857e-248	2.48248e-247
RPL24	826.814	-2.73418	0.0812579	-33.6482	3.31123e-248	4.21556e-247
SDF2	85.1476	-1.31951	0.0392234	-33.6409	4.2323e-248	5.38441e-247
KAT6A	480.195	0.699157	0.0207839	33.6394	4.45061e-248	5.65819e-247
TARBP1	265.216	1.14891	0.0341784	33.6152	1.00718e-247	1.27957e-246
SAMM50	74.3032	-0.98449	0.0292906	-33.6112	1.1514e-247	1.46176e-246
SRP72	147.834	-0.929164	0.0276596	-33.5928	2.13798e-247	2.71238e-246
MKKS	73.7074	-1.60178	0.0476853	-33.5906	2.29887e-247	2.91447e-246
NCSTN	61.2287	-1.26242	0.037587	-33.5866	2.63235e-247	3.33492e-246
POU2F1	877.539	0.72002	0.0214516	33.5648	5.47412e-247	6.92956e-246
RALGAPA1	1012.35	0.674679	0.0201008	33.5648	5.47733e-247	6.92956e-246
ATG4D	63.962	-1.1421	0.0340351	-33.5564	7.25424e-247	9.17122e-246
METTL5	94.2151	-1.17855	0.0351275	-33.5505	8.83892e-247	1.11669e-245
AC012447.1	41.8484	-2.49163	0.0742793	-33.5441	1.09918e-246	1.38771e-245
MRPS10	103.51	-1.14663	0.0341844	-33.5424	1.16277e-246	1.46698e-245
UQCC1	253.282	0.718347	0.0214286	33.5228	2.24635e-246	2.83208e-245
CCDC25	112.806	-1.17574	0.0350832	-33.513	3.11596e-246	3.92572e-245
YIF1A	73.2153	-1.81956	0.0542966	-33.5115	3.27489e-246	4.12309e-245
WDR61	244.243	-1.23324	0.0368015	-33.5106	3.37951e-246	4.25186e-245
PFDN6	72.8775	-2.15523	0.0643293	-33.5032	4.33646e-246	5.45207e-245
RRAGC	65.401	-1.53239	0.0457428	-33.5002	4.7857e-246	6.01271e-245
AL591242.1	50.477	2.65099	0.0791408	33.4971	5.31086e-246	6.66792e-245
CCDC85B	226.042	-2.24705	0.0671223	-33.477	1.04188e-245	1.3072e-244
AL355075.4	24.559	-3.95531	0.118168	-33.472	1.2337e-245	1.5468e-244
PRPF38B	162.023	-1.07053	0.0320023	-33.4516	2.43657e-245	3.05284e-244
IER2	408.52	-2.73961	0.081915	-33.4446	3.08284e-245	3.85992e-244
MRPL34	133.889	-1.81759	0.054349	-33.443	3.25461e-245	4.07218e-244
AMD1	330.961	-1.65826	0.0495863	-33.4418	3.3876e-245	4.23567e-244
GTF2A2	171.285	-1.89723	0.0567367	-33.4391	3.70712e-245	4.63199e-244
YBX1	671.425	-2.5489	0.076226	-33.4387	3.75947e-245	4.69417e-244
GNL1	98.8129	-1.01838	0.0304568	-33.437	3.97512e-245	4.96004e-244
ANKRD28	699.931	1.0714	0.0320603	33.4183	7.44425e-245	9.28234e-244
TUBG1	42.4195	-1.65547	0.0495499	-33.4101	9.77507e-245	1.21803e-243
ZNHIT2	19.7082	-2.06093	0.0616865	-33.4097	9.90696e-245	1.23362e-243
MIF	1202.97	-3.02958	0.0906977	-33.403	1.23896e-244	1.54171e-243
VPS39	133.523	0.754855	0.0225995	33.4014	1.30703e-244	1.6253e-243
CHMP1B	77.4561	-2.06166	0.0617513	-33.3865	2.15403e-244	2.67671e-243
ANAPC16	498.591	-1.07359	0.0321606	-33.3821	2.4977e-244	3.10165e-243
PIM2	14.3191	-2.24318	0.0672041	-33.3787	2.79301e-244	3.466e-243
TLK2	341.131	0.871886	0.0261213	33.3783	2.83002e-244	3.50953e-243
PKN2	764.936	0.715723	0.0214433	33.3774	2.91638e-244	3.61417e-243
C12orf10	75.0187	-2.06178	0.0617851	-33.3702	3.71045e-244	4.59509e-243
NIPA2	71.5792	-0.965084	0.0289241	-33.3661	4.26001e-244	5.27209e-243
RPS7	995.691	-2.7405	0.0821343	-33.366	4.26448e-244	5.27404e-243
ARMC7	13.8515	-1.69887	0.0509172	-33.3654	4.36103e-244	5.38977e-243
HACD3	389.348	-0.864034	0.0258963	-33.3652	4.38674e-244	5.41787e-243
CDO1	60.2754	-2.01866	0.0605415	-33.3433	9.10607e-244	1.12389e-242
AC023157.3	26.9591	-2.15282	0.0645657	-33.3431	9.17224e-244	1.13128e-242
TRMT6	30.96	-1.60443	0.04813	-33.3353	1.19141e-243	1.46846e-242
PHF23	28.4371	-1.86509	0.0559569	-33.3309	1.37817e-243	1.6975e-242
ATR	395.338	0.934497	0.0280392	33.3283	1.50472e-243	1.85211e-242
BOD1	97.8719	-1.74859	0.052475	-33.3224	1.82954e-243	2.25041e-242
LARP6	63.6864	-2.08175	0.0624752	-33.3213	1.89926e-243	2.33459e-242
AC093297.1	13.1832	3.53047	0.105959	33.3191	2.04034e-243	2.50631e-242
MRPL38	81.3627	-1.25706	0.0377304	-33.3169	2.19468e-243	2.69407e-242
HSD17B8	27.4194	-1.90195	0.0571	-33.3091	2.84781e-243	3.49346e-242
ANKRD54	61.2238	-0.956856	0.0287328	-33.3019	3.62605e-243	4.44515e-242
SESN2	45.5224	-2.21228	0.0664339	-33.3005	3.79273e-243	4.64634e-242
MTMR3	350.69	0.969345	0.0291101	33.2993	3.95168e-243	4.83782e-242
HIST1H4C	398.408	-3.31443	0.0995369	-33.2985	4.06512e-243	4.97334e-242
CES2	62.0788	-1.19197	0.0358065	-33.2892	5.54073e-243	6.77408e-242
GRINA	209.883	-1.76506	0.0530363	-33.2801	7.4828e-243	9.14229e-242
MRPL37	44.9435	-1.27033	0.0381712	-33.2799	7.54823e-243	9.21604e-242
BORCS6	34.3287	-2.26234	0.0680002	-33.2697	1.06065e-242	1.29414e-241
HMGA1	95.7174	-2.12792	0.0639628	-33.268	1.11966e-242	1.36521e-241
RPL17	1257.96	-3.00422	0.0903171	-33.263	1.32422e-242	1.61356e-241
ZFYVE16	416.376	0.842508	0.0253447	33.242	2.66109e-242	3.24037e-241
RPL22L1	54.7425	-2.5561	0.0769009	-33.2389	2.95697e-242	3.59824e-241
ABCB10	92.6028	0.999797	0.0300938	33.2227	5.06261e-242	6.15641e-241
AL031710.1	13.7228	-2.63042	0.0791958	-33.2142	6.72565e-242	8.17328e-241
NDUFB10	247.692	-2.62329	0.0789938	-33.2088	8.03437e-242	9.75718e-241
ESS2	21.821	-1.26703	0.0381539	-33.2084	8.15639e-242	9.89875e-241
PGLS	76.5864	-1.36574	0.0411324	-33.2034	9.60829e-242	1.1653e-240
AC093323.1	30.8145	-1.73295	0.0521957	-33.201	1.04251e-241	1.26352e-240
TRAPPC4	117.408	-1.53128	0.0461223	-33.2004	1.06195e-241	1.28623e-240
DNAJB11	78.9083	-1.6791	0.0505805	-33.1966	1.20533e-241	1.45892e-240
SNHG11	24.096	-1.53543	0.0462533	-33.1961	1.22429e-241	1.48088e-240
HIST1H2BG	30.2395	-3.9779	0.119832	-33.1956	1.24567e-241	1.50574e-240
NCOA2	904.361	0.742094	0.0223557	33.1948	1.27995e-241	1.54614e-240
HUWE1	392.299	0.576941	0.0173996	33.1584	4.28631e-241	5.17432e-240
BRF2	22.4381	-1.57377	0.0474688	-33.1538	4.99804e-241	6.02949e-240
C12orf43	35.7413	-1.49961	0.0452389	-33.1486	5.93065e-241	7.14982e-240
PDK2	57.0345	-1.53692	0.0463688	-33.1455	6.57098e-241	7.91653e-240
EXOSC5	28.1188	-1.60217	0.0483459	-33.1397	7.96373e-241	9.58812e-240
AC009716.1	28.5408	3.03433	0.0915866	33.1307	1.07407e-240	1.29229e-239
NAP1L5	83.0273	-2.35567	0.0711335	-33.1162	1.73654e-240	2.08799e-239
HDDC2	165.433	-2.05437	0.0620392	-33.1141	1.86411e-240	2.23989e-239
UBE2V2	256.364	-1.27497	0.038509	-33.1084	2.24837e-240	2.69982e-239
COX20	295.225	-1.22595	0.0370327	-33.1047	2.54669e-240	3.05603e-239
PEX10	58.8931	-1.17444	0.0354866	-33.0955	3.45259e-240	4.14037e-239
AC040169.1	13.5035	-1.93855	0.0585878	-33.0879	4.43555e-240	5.31565e-239
SRSF3	400.802	-1.62368	0.0490743	-33.0862	4.69027e-240	5.6172e-239
STRN	257.01	0.665235	0.020108	33.0831	5.19415e-240	6.21656e-239
TAF12	92.1696	-0.926481	0.0280092	-33.0778	6.20674e-240	7.42359e-239
KIAA1328	495.238	0.907402	0.0274352	33.0744	6.94464e-240	8.3007e-239
AUH	568.672	0.825726	0.0249704	33.0682	8.50621e-240	1.01605e-238
HDDC3	45.8017	-1.60162	0.0484383	-33.0652	9.39241e-240	1.12117e-238
TMEM14C	162.872	-2.16178	0.0654147	-33.0474	1.69657e-239	2.02386e-238
FOSB	190.843	-5.57057	0.168585	-33.0432	1.94875e-239	2.32317e-238
ANKIB1	502.185	0.702955	0.0212742	33.0426	1.98768e-239	2.36802e-238
ZNF426	56.1655	-1.08251	0.0327686	-33.0351	2.54349e-239	3.02821e-238
ZNF354C	66.1736	0.912373	0.027619	33.0343	2.61825e-239	3.11516e-238
RHBDD1	231.567	0.799624	0.0242111	33.0272	3.31083e-239	3.93662e-238
PEPD	135.845	-1.17893	0.035696	-33.0269	3.33945e-239	3.96805e-238
BGLAP	15.575	-2.34007	0.0708571	-33.0252	3.53084e-239	4.19273e-238
SIX3-AS1	57.3428	-2.34482	0.0710028	-33.0244	3.62747e-239	4.30466e-238
WDR45	77.2077	-1.23304	0.0373459	-33.0169	4.65431e-239	5.51959e-238
PRPS1	41.5329	-1.9433	0.0588775	-33.0058	6.70992e-239	7.95217e-238
CDIPT	123.59	-1.5187	0.0460255	-32.9969	8.99322e-239	1.06513e-237
RIC1	276.367	0.760272	0.0230459	32.9894	1.15229e-238	1.36384e-237
MAD2L2	22.5444	-1.67133	0.0506788	-32.979	1.62615e-238	1.92344e-237
COX7A1	163.363	-2.84451	0.086253	-32.9786	1.64569e-238	1.94529e-237
SRSF9	176.008	-1.62109	0.049159	-32.9765	1.76504e-238	2.08502e-237
SLX4IP	252.116	0.880818	0.0267119	32.9747	1.87045e-238	2.2081e-237
UBA52	411.489	-2.78147	0.0843531	-32.9741	1.91066e-238	2.2541e-237
AC027644.3	52.8012	-1.60505	0.0486844	-32.9684	2.3026e-238	2.71474e-237
TMEM192	132.565	-0.931165	0.0282474	-32.9646	2.61121e-238	3.07659e-237
EDEM1	39.3829	1.19061	0.0361274	32.9558	3.49377e-238	4.11378e-237
GPR137	66.0777	-1.5709	0.0476721	-32.9522	3.93375e-238	4.62884e-237
COL28A1	119.808	1.44166	0.0437518	32.9509	4.10537e-238	4.82766e-237
KIAA1191	94.8336	-1.15758	0.0351334	-32.948	4.51252e-238	5.30301e-237
LCOR	655.983	0.774932	0.0235205	32.9471	4.65286e-238	5.46441e-237
NRBF2	47.32	-1.49853	0.0454828	-32.9471	4.65629e-238	5.46491e-237
TUBA1A	975.123	-2.27683	0.069117	-32.9417	5.56837e-238	6.53116e-237
CHMP4A	112.796	-0.991075	0.0300888	-32.9384	6.20791e-238	7.27658e-237
HNRNPM	452.662	-0.79512	0.0241409	-32.9367	6.56864e-238	7.69445e-237
NUBPL	454.425	0.781721	0.0237346	32.9359	6.74026e-238	7.8904e-237
KIAA0319L	445.697	0.707718	0.0214883	32.935	6.92874e-238	8.10582e-237
C18orf32	450.712	-2.06503	0.0627052	-32.9323	7.5854e-238	8.86833e-237
AC092567.1	90.1268	1.7588	0.05343	32.9179	1.21758e-237	1.4226e-236
TMEM69	42.7308	-1.43653	0.0436406	-32.9174	1.24063e-237	1.4486e-236
HERC1	831.737	0.684642	0.0208029	32.9108	1.53857e-237	1.79533e-236
PBDC1	37.043	-1.92032	0.0583556	-32.9072	1.73612e-237	2.02454e-236
CEP95	267.561	0.88795	0.0269882	32.9014	2.10128e-237	2.44879e-236
NAP1L1	685.166	-1.03489	0.0314744	-32.8804	4.1858e-237	4.87494e-236
LRBA	1328.24	0.958916	0.0291664	32.8774	4.61987e-237	5.37704e-236
RPL27A	990.481	-3.11959	0.0948947	-32.8742	5.13417e-237	5.9718e-236
NDUFB3	214.986	-2.47906	0.0754382	-32.8621	7.65469e-237	8.89785e-236
DNAJB4	112.438	-2.09451	0.0637668	-32.8464	1.28175e-236	1.48896e-235
AC019163.1	15.466	-2.08914	0.0636333	-32.831	2.12981e-236	2.47254e-235
RPS24	1059.23	-2.56764	0.0782189	-32.8264	2.47433e-236	2.87067e-235
COA7	20.3704	-1.71674	0.0523205	-32.8121	3.96334e-236	4.59525e-235
PPA1	881.648	-1.66887	0.0508735	-32.8042	5.12819e-236	5.94204e-235
PGD	93.5677	-1.3429	0.0409369	-32.8042	5.13501e-236	5.94614e-235
ST7L	216.343	0.653175	0.0199141	32.7996	5.96305e-236	6.90058e-235
DDX39A	37.381	-1.50738	0.04597	-32.7905	8.04421e-236	9.30303e-235
RBM7	39.9268	-1.53206	0.0467364	-32.7809	1.10253e-235	1.27426e-234
DCK	54.2748	-2.05587	0.062721	-32.7779	1.21467e-235	1.40297e-234
MOAP1	194.466	-1.95146	0.0595662	-32.7613	2.09807e-235	2.42178e-234
EEF1B2	239.2	-2.46101	0.0751442	-32.7505	2.98283e-235	3.44085e-234
MAP1LC3B	440.332	-1.95792	0.0597851	-32.7493	3.11048e-235	3.58583e-234
TWF2	25.0021	-1.88427	0.0575375	-32.7486	3.18269e-235	3.66675e-234
TM9SF1	50.3343	-1.44084	0.0439997	-32.7467	3.38681e-235	3.89944e-234
ZNF630-AS1	11.0263	2.84448	0.0868903	32.7364	4.73604e-235	5.44944e-234
DNAJC30	54.1114	-1.29011	0.0394117	-32.7343	5.07686e-235	5.8379e-234
R3HDM4	24.1235	-1.35316	0.0413525	-32.7225	7.47041e-235	8.58483e-234
MED4	200.914	-0.980138	0.0299601	-32.7147	9.64049e-235	1.10716e-233
SPAST	190.755	0.812107	0.0248256	32.7124	1.04024e-234	1.19392e-233
SLC25A39	74.5419	-1.33524	0.0408288	-32.7033	1.40086e-234	1.60679e-233
CISD1	267.537	-1.63898	0.0501438	-32.6857	2.49773e-234	2.8631e-233
UBE2D1	96.1769	-1.25868	0.0385106	-32.6841	2.62555e-234	3.00772e-233
FKBP1A	73.3069	-1.38259	0.042304	-32.6823	2.78855e-234	3.19243e-233
RPTOR	296.184	0.868622	0.0265781	32.6818	2.82938e-234	3.23714e-233
KIF22	63.4044	-1.42503	0.0436097	-32.677	3.3169e-234	3.79253e-233
DNPEP	61.8053	-0.985589	0.0301696	-32.6683	4.40984e-234	5.03903e-233
RPL30	781.376	-2.57002	0.0786872	-32.6613	5.54348e-234	6.33043e-233
FAF1	1163.64	0.840423	0.025738	32.6531	7.2492e-234	8.27309e-233
UBL4A	31.2511	-2.04714	0.0627145	-32.6422	1.03422e-233	1.17956e-232
APLP1	200.291	-1.67785	0.0514074	-32.6384	1.1719e-233	1.33574e-232
TMEM14A	168.963	-1.72139	0.0527444	-32.6365	1.2466e-233	1.42e-232
PIBF1	524.775	0.747218	0.0228986	32.6316	1.45967e-233	1.66166e-232
DBNDD2	87.2191	-2.04641	0.0627516	-32.6114	2.83037e-233	3.22004e-232
FAM200B	157.786	-1.53409	0.0470442	-32.6096	2.99783e-233	3.40841e-232
MRPS23	108.078	-1.43476	0.0440073	-32.6027	3.75717e-233	4.26908e-232
USP24	412.208	1.05533	0.0323779	32.5941	4.9701e-233	5.64375e-232
CKS1B	23.6386	-2.66912	0.0818937	-32.5925	5.24483e-233	5.952e-232
C1QBP	162.504	-2.16557	0.0664503	-32.5893	5.81583e-233	6.59587e-232
RPL13A	1697.46	-3.38813	0.104031	-32.5686	1.14208e-232	1.29445e-231
RFX3	650.086	0.871173	0.0267549	32.5612	1.45378e-232	1.64672e-231
CNP	81.7104	-1.64689	0.0505823	-32.5585	1.58528e-232	1.79455e-231
RBM23	252.281	-0.894444	0.0274759	-32.5538	1.85116e-232	2.09422e-231
NELFCD	139.206	-0.752445	0.0231151	-32.5521	1.95385e-232	2.20902e-231
NAGK	97.3379	-1.0291	0.0316195	-32.5462	2.36669e-232	2.67411e-231
ALDH2	207.404	-1.15418	0.0354669	-32.5425	2.67002e-232	3.01496e-231
LMAN2	102.929	-1.52369	0.0468353	-32.5329	3.65914e-232	4.12931e-231
RNF26	26.0217	-2.23941	0.0688535	-32.5242	4.84502e-232	5.46417e-231
DENND5B	936.283	0.724056	0.0222632	32.5226	5.11749e-232	5.76789e-231
RAD1	58.8666	-0.909145	0.0279548	-32.522	5.21197e-232	5.87074e-231
RRS1	24.5574	-2.05649	0.0632386	-32.5195	5.6523e-232	6.36277e-231
RPL29	614.708	-2.85725	0.0878749	-32.515	6.54547e-232	7.36365e-231
POLR2H	73.4184	-1.16012	0.0356822	-32.5127	7.05645e-232	7.9336e-231
PIGBOS1	33.9403	-1.25365	0.0385792	-32.4955	1.23405e-231	1.38659e-230
NDUFAF8	106.346	-1.19944	0.0369195	-32.488	1.57712e-231	1.77098e-230
BECN1	56.1217	-1.08983	0.0335492	-32.4844	1.77202e-231	1.9886e-230
NDUFA13	518.259	-2.11367	0.0650708	-32.4826	1.87816e-231	2.10641e-230
PRPF31	88.8287	-1.00812	0.03104	-32.4782	2.16776e-231	2.4297e-230
ZNF445	107.425	0.738131	0.0227327	32.47	2.82911e-231	3.16902e-230
CMC4	21.641	-2.02766	0.0624595	-32.4637	3.47551e-231	3.89069e-230
NOB1	33.459	-1.33415	0.0410971	-32.4633	3.51214e-231	3.92928e-230
NSA2	120.375	-1.38017	0.0425203	-32.4592	4.0234e-231	4.49849e-230
ENY2	203.491	-0.993694	0.0306372	-32.4342	9.05087e-231	1.01134e-229
UGGT2	451.918	0.901001	0.0277902	32.4216	1.36394e-230	1.52313e-229
THAP11	35.5789	-1.97015	0.0607672	-32.4213	1.37502e-230	1.53456e-229
AKT2	194.836	0.840876	0.025936	32.4212	1.37973e-230	1.53886e-229
RPL18	828.007	-2.36223	0.0728818	-32.4118	1.86982e-230	2.0842e-229
ROGDI	230.099	-1.3804	0.0425985	-32.4048	2.34834e-230	2.61598e-229
PSME2	77.6311	-1.61557	0.0498573	-32.4039	2.42195e-230	2.69633e-229
CKB	4714.36	-1.8213	0.056222	-32.3948	3.25189e-230	3.61807e-229
TRAF3IP2-AS1	555.915	0.788276	0.0243345	32.3933	3.40893e-230	3.79048e-229
TAOK1	536.128	0.707696	0.0218496	32.3894	3.86685e-230	4.29702e-229
CNRIP1	205.774	-1.01371	0.0312982	-32.3888	3.95251e-230	4.38953e-229
SCCPDH	111.001	-1.05953	0.032732	-32.3698	7.29717e-230	8.09906e-229
SLC25A33	304.334	-1.22265	0.0377823	-32.3605	9.86494e-230	1.09423e-228
MRFAP1L1	95.83	-1.83422	0.0567073	-32.3454	1.60965e-229	1.78435e-228
KBTBD7	42.0562	-1.49701	0.0462867	-32.3422	1.78857e-229	1.98148e-228
RPS2	880.951	-2.90767	0.0899065	-32.3411	1.8521e-229	2.05062e-228
TMEM126A	64.9432	-1.65781	0.0512609	-32.3407	1.87285e-229	2.07233e-228
ING2	53.8329	-1.68321	0.0520505	-32.338	2.04307e-229	2.25931e-228
MAGI1-AS1	81.448	2.39859	0.0741736	32.3375	2.07701e-229	2.29545e-228
ULK2	221.523	0.815435	0.0252226	32.3295	2.69412e-229	2.97565e-228
CNPY3	63.2241	-1.31289	0.0406105	-32.3289	2.7482e-229	3.03354e-228
RBM3	147.119	-1.86956	0.0578324	-32.3273	2.89588e-229	3.19461e-228
NACA	787.102	-2.54895	0.0788536	-32.3251	3.10453e-229	3.4227e-228
RPUSD2	26.023	-1.58904	0.0491607	-32.3235	3.27319e-229	3.60646e-228
RTCB	187.728	-0.842243	0.0260588	-32.3208	3.56917e-229	3.93019e-228
ECSIT	114.151	-0.889401	0.027531	-32.3055	5.85931e-229	6.44808e-228
TMCO1	299.421	-1.1784	0.0364787	-32.3039	6.16651e-229	6.78204e-228
PELO	30.7557	-1.95263	0.0604469	-32.3032	6.3002e-229	6.92489e-228
SLC35A4	31.2014	-1.97004	0.0609911	-32.3004	6.90679e-229	7.58704e-228
FADD	13.2738	-2.03367	0.0629694	-32.2961	7.92483e-229	8.70008e-228
PRPF38A	88.4212	-0.862644	0.0267115	-32.2948	8.26368e-229	9.06661e-228
HPF1	123.302	-1.16419	0.0360681	-32.2775	1.44583e-228	1.58536e-227
QSER1	159.931	0.741404	0.0229713	32.2753	1.5551e-228	1.70414e-227
H3F3B	2750.62	-1.9792	0.0613552	-32.2581	2.70568e-228	2.96321e-227
MCM3AP	120.636	0.883012	0.027382	32.2479	3.7686e-228	4.12481e-227
XAB2	42.0278	-1.30028	0.0403322	-32.2394	4.95845e-228	5.42386e-227
MRPL54	116.451	-2.35627	0.0730953	-32.2356	5.59442e-228	6.11585e-227
GAR1	51.1296	-1.08069	0.033533	-32.2277	7.22699e-228	7.89584e-227
MTX1	27.9436	-2.06589	0.0641123	-32.2231	8.38981e-228	9.16077e-227
RPSA	635.3	-2.45894	0.0763356	-32.2122	1.18927e-227	1.29777e-226
BRWD3	314.387	0.8807	0.0273533	32.1972	1.93286e-227	2.10795e-226
CDC26	84.9484	-1.63012	0.05064	-32.1904	2.40614e-227	2.62252e-226
RPS16	839.953	-2.71727	0.0844245	-32.1858	2.78814e-227	3.03705e-226
IFIT5	33.2295	-2.04359	0.0635103	-32.1773	3.6724e-227	3.99786e-226
FTO	939.566	0.693979	0.0215694	32.1742	4.05744e-227	4.41438e-226
AP4E1	103.2	0.830906	0.0258278	32.1711	4.48408e-227	4.87563e-226
MTR	291.835	0.884164	0.0274916	32.1612	6.15663e-227	6.69023e-226
TMEM167B	61.5915	-1.48888	0.0462981	-32.1585	6.72239e-227	7.30066e-226
ISCA2	66.9394	-1.7402	0.0541159	-32.157	7.0591e-227	7.66176e-226
TBC1D5	1082.71	0.785862	0.0244458	32.1472	9.6789e-227	1.04989e-225
SELENOS	152.025	-1.4198	0.0441694	-32.1444	1.05744e-226	1.14635e-225
PYM1	50.5145	-1.37228	0.0426923	-32.1434	1.09101e-226	1.18203e-225
AC006333.2	33.098	-1.78219	0.0554544	-32.138	1.29976e-226	1.40736e-225
METAP2	234.931	-0.7489	0.0233113	-32.126	1.91125e-226	2.06825e-225
PNRC1	426.494	-1.83469	0.0571345	-32.1119	3.00951e-226	3.25478e-225
AL049637.1	13.1267	2.92815	0.0911973	32.1079	3.41821e-226	3.6946e-225
INTU	397.762	1.03038	0.0320965	32.1026	4.05514e-226	4.38041e-225
RXRB	57.2639	-1.15565	0.035999	-32.1022	4.10645e-226	4.43321e-225
SCAMP3	88.2115	-1.19939	0.0373664	-32.098	4.69837e-226	5.06922e-225
SPACA9	41.3329	-1.24327	0.0387517	-32.0829	7.63713e-226	8.23506e-225
ANP32A	289.92	-0.964517	0.0300649	-32.0812	8.06987e-226	8.69652e-225
PDCL	93.1304	-1.15447	0.0359878	-32.0795	8.51876e-226	9.17482e-225
RNASEH1	71.8208	-1.02351	0.0319174	-32.0674	1.25491e-225	1.35075e-224
WDR27	183.566	1.05947	0.0330462	32.0602	1.58008e-225	1.69975e-224
PMPCA	56.4172	-0.97921	0.030543	-32.06	1.59078e-225	1.71025e-224
RYK	238.589	0.964708	0.0301031	32.0467	2.43682e-225	2.61828e-224
MTIF3	301.608	-0.883848	0.02758	-32.0467	2.43966e-225	2.61979e-224
PFDN1	164.563	-1.10101	0.0343588	-32.0446	2.61329e-225	2.80458e-224
CCT7	170.972	-1.75656	0.0548239	-32.0402	3.0107e-225	3.22918e-224
TDRD3	337.581	0.84313	0.026324	32.029	4.30438e-225	4.61401e-224
FAM71E1	19.7531	-2.15883	0.0674152	-32.0229	5.23141e-225	5.60442e-224
ZNF503	41.1043	-2.23414	0.0697752	-32.0191	5.92039e-225	6.33879e-224
PRDX2	770.1	-2.24719	0.0701838	-32.0187	5.98936e-225	6.40886e-224
SNAPC5	69.9182	-1.3699	0.0427902	-32.0143	6.90293e-225	7.38208e-224
HIST1H2BD	90.4173	-2.97327	0.0928747	-32.0138	7.00527e-225	7.48711e-224
COA4	53.9743	-1.3431	0.0419648	-32.0055	9.15567e-225	9.77967e-224
VAPA	530.666	-0.875167	0.0273469	-32.0024	1.01053e-224	1.07877e-223
ATP6V0C	779.942	-2.1842	0.0682645	-31.9961	1.23494e-224	1.31756e-223
SLC35B2	34.7618	-1.93025	0.0603333	-31.9932	1.35609e-224	1.44596e-223
MRPL41	180.046	-2.20905	0.0690729	-31.9815	1.97339e-224	2.10295e-223
SNX14	423.903	0.567155	0.0177372	31.9755	2.39127e-224	2.54676e-223
UGGT1	140.731	0.77157	0.0241305	31.9749	2.43672e-224	2.59366e-223
NPRL2	52.8713	-1.13171	0.035395	-31.9736	2.53724e-224	2.69906e-223
LEMD3	198.14	0.961432	0.0300758	31.9669	3.14252e-224	3.34099e-223
RPS27A	1466.42	-3.06228	0.0958277	-31.9561	4.44684e-224	4.72493e-223
YTHDF3-AS1	15.5062	-1.90353	0.0595712	-31.9538	4.78381e-224	5.08e-223
SELENOK	395.026	-2.29626	0.0719122	-31.9315	9.76889e-224	1.03677e-222
APRT	70.846	-2.22066	0.0695835	-31.9137	1.72467e-223	1.82931e-222
NDUFA4	1233.92	-2.62949	0.0824317	-31.899	2.75591e-223	2.92143e-222
TRPC1	576.291	0.769217	0.024122	31.8886	3.84346e-223	4.07192e-222
PSMB10	30.8033	-2.24373	0.0703681	-31.8856	4.23158e-223	4.4805e-222
TTC37	478.871	0.637588	0.0200042	31.8727	6.37984e-223	6.7512e-222
NFKBIL1	48.0201	-1.21719	0.0381893	-31.8725	6.43282e-223	6.8033e-222
MZT1	76.58	-1.72562	0.0541882	-31.845	1.54314e-222	1.63106e-221
COMMD8	51.4392	-2.03955	0.064048	-31.844	1.59348e-222	1.68329e-221
NDUFAB1	276.012	-2.05131	0.0644382	-31.8337	2.2109e-222	2.33416e-221
LINC00894	243.634	1.09734	0.0344762	31.829	2.57366e-222	2.71557e-221
TBRG4	34.7303	-1.27547	0.0400879	-31.817	3.77144e-222	3.97707e-221
RSRC2	415.026	-0.814183	0.02559	-31.8164	3.8362e-222	4.04302e-221
CCDC43	55.4242	-1.24718	0.0392078	-31.8094	4.80602e-222	5.06219e-221
TEX264	101.462	-1.54727	0.0486438	-31.8082	4.99002e-222	5.25296e-221
CDK8	473.346	0.718742	0.0226021	31.7997	6.52578e-222	6.86566e-221
HSD11B1L	52.6381	-1.4574	0.045831	-31.7993	6.61418e-222	6.95464e-221
KXD1	76.8989	-1.4097	0.0443331	-31.798	6.8998e-222	7.25077e-221
NUP205	111.899	0.790246	0.0248525	31.7974	7.02718e-222	7.38037e-221
ADAM10	412.599	0.76995	0.024215	31.7965	7.24569e-222	7.60546e-221
LYPLA2	51.2436	-1.83644	0.0577825	-31.782	1.14944e-221	1.20582e-220
SERPINH1	30.4694	-4.04791	0.127369	-31.781	1.18423e-221	1.2416e-220
RAPGEF6	580.02	0.774666	0.0243793	31.7756	1.40831e-221	1.47568e-220
MAPRE1	67.0021	-1.28497	0.0404422	-31.773	1.52671e-221	1.59882e-220
BET1	80.9012	-1.04092	0.0327687	-31.7657	1.92824e-221	2.01816e-220
PCMT1	357.273	-1.26693	0.0398916	-31.7594	2.3587e-221	2.46727e-220
DTYMK	46.3097	-1.31921	0.0415382	-31.7589	2.39491e-221	2.50371e-220
HMGN4	65.8013	-1.51518	0.0477107	-31.7577	2.48451e-221	2.59588e-220
ZNF431	168.19	0.873779	0.0275149	31.7566	2.57368e-221	2.68751e-220
TULP2	24.3502	-4.06354	0.127989	-31.7491	3.26745e-221	3.41e-220
KDM1A	192.139	0.745706	0.0234881	31.7483	3.35608e-221	3.50048e-220
LINC00324	6.50888	-2.475	0.0779856	-31.7366	4.86022e-221	5.06644e-220
SBF2	1295.74	0.856779	0.0269995	31.7331	5.42484e-221	5.65178e-220
SON	853.887	-0.882294	0.0278113	-31.7243	7.17515e-221	7.47103e-220
TRIM33	443.202	0.742055	0.0233933	31.7208	8.03179e-221	8.35821e-220
RFC2	43.0116	-1.07815	0.0340094	-31.7014	1.48393e-220	1.54336e-219
DCAF7	278.427	-0.578075	0.0182456	-31.683	2.6602e-220	2.76515e-219
MDM4	365.994	0.686353	0.021669	31.6744	3.50317e-220	3.6393e-219
FAM174A	138.929	-1.17443	0.0370915	-31.6631	5.00783e-220	5.19945e-219
TAF1A-AS1	10.5259	-2.17427	0.0686745	-31.6605	5.4329e-220	5.63756e-219
HSPA1L	12.2621	-3.11737	0.0984783	-31.6554	6.39029e-220	6.62724e-219
DEXI	64.004	-1.84665	0.0583416	-31.6524	7.03345e-220	7.29009e-219
TIMM8A	14.0769	-1.57343	0.0497119	-31.6509	7.36316e-220	7.62747e-219
ARMCX2	33.8911	-1.40067	0.0442575	-31.6481	8.05048e-220	8.33472e-219
NOC4L	19.8275	-1.49076	0.0471179	-31.639	1.07475e-219	1.11206e-218
GPAA1	114.227	-1.49931	0.0473967	-31.6332	1.2925e-219	1.33661e-218
LINC02525	16.9569	-1.96918	0.062254	-31.6314	1.36523e-219	1.41102e-218
QARS	55.8532	-1.13044	0.0357501	-31.6204	1.93337e-219	1.99708e-218
TUBA1B	1596.72	-2.37465	0.0751086	-31.6162	2.20862e-219	2.2801e-218
NRBP1	141.764	-0.897102	0.0283788	-31.6117	2.55221e-219	2.63332e-218
ZNF626	171.887	0.723178	0.0228774	31.6111	2.60137e-219	2.68253e-218
LEPROTL1	101.965	-1.16829	0.0369634	-31.6065	3.00246e-219	3.09437e-218
MGAT2	26.9231	-1.88196	0.0595479	-31.6042	3.23131e-219	3.32834e-218
DIDO1	191.949	0.653615	0.0206823	31.6027	3.39456e-219	3.49452e-218
TMEM205	102.734	-1.58375	0.0501273	-31.5946	4.37298e-219	4.4992e-218
CDC42BPB	261.571	0.696475	0.0220448	31.5936	4.51459e-219	4.64226e-218
HSPB8	162.244	-2.68894	0.0851147	-31.592	4.75653e-219	4.88828e-218
TMEM9	140.133	-1.43198	0.0453365	-31.5857	5.80749e-219	5.96498e-218
LRRC23	254.994	-1.31204	0.0415479	-31.5789	7.20539e-219	7.39661e-218
MINCR	28.2852	-1.75037	0.0554394	-31.5727	8.75145e-219	8.97863e-218
HAGH	307.566	-0.991304	0.0313988	-31.5713	9.13538e-219	9.36725e-218
CD59	271.613	-1.96003	0.0620914	-31.5669	1.05166e-218	1.07774e-217
ZPR1	23.5869	-1.56966	0.0497315	-31.5627	1.19969e-218	1.22875e-217
DIS3L2	448.305	0.718192	0.0227656	31.5473	1.95341e-218	1.9996e-217
WDR18	58.9937	-1.33214	0.0422349	-31.5413	2.36266e-218	2.41718e-217
ATP6V1B2	328.686	-1.41373	0.0448226	-31.5405	2.41966e-218	2.47409e-217
RPGRIP1L	78.5925	1.03999	0.032982	31.532	3.16371e-218	3.23306e-217
ISOC1	43.0539	-2.14111	0.0679262	-31.5212	4.45126e-218	4.54628e-217
ZNF674	54.3503	1.13341	0.035959	31.5196	4.67593e-218	4.77307e-217
AC092574.2	97.8361	1.71347	0.0543831	31.5075	6.85977e-218	6.99836e-217
TWF1	55.1162	-1.349	0.042844	-31.4862	1.3403e-217	1.36661e-216
DKC1	72.8436	-0.938134	0.0297964	-31.4848	1.40415e-217	1.43091e-216
PDHA1	136.972	-0.977261	0.0310404	-31.4835	1.4591e-217	1.48607e-216
KPNB1	326.063	-0.605344	0.0192277	-31.4829	1.49092e-217	1.51763e-216
HSP90B1	294.307	-1.92736	0.061226	-31.4795	1.65793e-217	1.68669e-216
COPRS	114.046	-2.2233	0.0706456	-31.4712	2.15593e-217	2.1921e-216
PPID	127.257	-1.20664	0.0383509	-31.4632	2.77265e-217	2.81759e-216
NCOA6	325.54	0.538372	0.0171151	31.4559	3.48195e-217	3.53642e-216
NCOA4	105.29	-1.2229	0.0388851	-31.449	4.33432e-217	4.39966e-216
BCL10	31.3667	-1.62961	0.0518287	-31.4422	5.36546e-217	5.4433e-216
BLVRA	78.1917	-1.29653	0.0412488	-31.4319	7.42228e-217	7.52577e-216
SNAPC2	26.8224	-1.94867	0.0620079	-31.4261	8.89438e-217	9.01337e-216
ZFP2	63.2455	1.02734	0.0327086	31.4088	1.53352e-216	1.55317e-215
ANKRD17	935.553	0.588693	0.0187464	31.403	1.83944e-216	1.86197e-215
AC018832.1	43.5477	2.41997	0.0771118	31.3826	3.49188e-216	3.53269e-215
RPS9	896.626	-2.75112	0.0876703	-31.3803	3.75501e-216	3.79678e-215
JAGN1	63.252	-1.95791	0.0623966	-31.3785	3.97942e-216	4.02145e-215
SAE1	132.465	-1.12084	0.035725	-31.3743	4.54175e-216	4.58717e-215
P4HTM	205.908	-0.998809	0.031865	-31.345	1.1369e-215	1.14763e-214
NEO1	347.532	0.84787	0.02705	31.3445	1.15566e-215	1.16592e-214
RPLP1	1948.99	-2.90996	0.0928705	-31.3335	1.63116e-215	1.64473e-214
PRMT1	293.058	-1.26577	0.0404009	-31.3302	1.80988e-215	1.82393e-214
BLOC1S4	53.3049	-1.74503	0.0557187	-31.3185	2.61663e-215	2.63547e-214
TPRA1	50.9011	-1.00399	0.0320626	-31.3133	3.07866e-215	3.09911e-214
RPL26	1082.42	-3.07059	0.0980727	-31.3094	3.47992e-215	3.5011e-214
PEX16	59.1588	-1.22472	0.0391176	-31.3088	3.54149e-215	3.56108e-214
ARHGAP17	173.83	0.914146	0.0292004	31.3059	3.87437e-215	3.89364e-214
POLK	271.385	0.554807	0.0177247	31.3014	4.46219e-215	4.48191e-214
LDOC1	74.1168	-1.78138	0.0569464	-31.2816	8.30185e-215	8.33394e-214
CPTP	18.7604	-1.79318	0.0573276	-31.2796	8.85157e-215	8.88088e-214
AC005899.7	14.3403	2.25601	0.0721313	31.2765	9.75588e-215	9.78278e-214
AP001011.1	314.209	1.62317	0.0519074	31.2706	1.1723e-214	1.17488e-213
R3HDM1	621.843	0.707419	0.0226239	31.2687	1.24243e-214	1.24448e-213
ZNF281	58.7643	-1.41962	0.0454083	-31.2635	1.46206e-214	1.46367e-213
SLF2	239.929	0.767362	0.0245461	31.262	1.53227e-214	1.53312e-213
RBL2	321.986	0.695037	0.0222329	31.2616	1.55144e-214	1.55144e-213
ATP6AP2	322.074	-1.75858	0.0562853	-31.244	2.69356e-214	2.69208e-213
ALKBH4	46.3252	-1.1405	0.0365067	-31.2409	2.96378e-214	2.96053e-213
UQCC3	69.851	-2.11997	0.067863	-31.2389	3.16067e-214	3.15546e-213
AP1S1	89.2598	-1.89298	0.0606077	-31.2334	3.7559e-214	3.74765e-213
DBI	293.461	-2.81526	0.0901605	-31.225	4.87401e-214	4.86064e-213
C4orf46	35.9585	-1.48538	0.0476172	-31.1942	1.27805e-213	1.27384e-212
MPHOSPH6	143.313	-1.00261	0.0321414	-31.1937	1.29637e-213	1.2914e-212
VKORC1	129.068	-1.59497	0.0511358	-31.1908	1.4205e-213	1.41428e-212
FAM50B	34.6129	-2.11861	0.067931	-31.1877	1.56471e-213	1.557e-212
C1orf50	50.4341	-1.06638	0.0341957	-31.1845	1.72877e-213	1.71931e-212
ZFAND3	1546.47	0.665289	0.0213368	31.1804	1.96768e-213	1.95584e-212
WWP1	489.347	0.711543	0.0228228	31.1768	2.19558e-213	2.18119e-212
LMO7	84.1696	1.24173	0.039831	31.1749	2.33598e-213	2.31939e-212
URI1	412.859	0.766472	0.0245895	31.1707	2.65775e-213	2.63744e-212
SLC10A3	8.54441	-2.26212	0.0725938	-31.1613	3.56092e-213	3.53178e-212
UBXN6	90.9707	-1.40772	0.0451781	-31.1594	3.78503e-213	3.75201e-212
LYRM1	117.82	-0.947385	0.0304092	-31.1546	4.39537e-213	4.35465e-212
PITPNA-AS1	30.7071	-1.61229	0.0517592	-31.1498	5.10271e-213	5.05268e-212
AL354733.2	22.2901	1.79591	0.0576567	31.1483	5.35419e-213	5.29881e-212
EMC8	72.5883	-0.998889	0.0320721	-31.1451	5.91657e-213	5.85219e-212
RABGAP1	456.564	0.653674	0.0209944	31.1356	7.94905e-213	7.85827e-212
TIMM10	46.6014	-2.64232	0.0848871	-31.1275	1.02387e-212	1.01163e-211
MRM2	40.393	-1.50271	0.0482806	-31.1244	1.12652e-212	1.11245e-211
HSP90AA1	3761.92	-2.15723	0.069338	-31.1118	1.66686e-212	1.64514e-211
NPAS4	12.158	-5.14195	0.165277	-31.111	1.70759e-212	1.68443e-211
FCHO2	225.244	0.942428	0.0302992	31.1041	2.12125e-212	2.09134e-211
TMEM99	24.0245	-1.58408	0.050943	-31.0952	2.79963e-212	2.75866e-211
LLPH	47.3417	-1.32722	0.0426885	-31.0908	3.21198e-212	3.16326e-211
SLC25A16	247.522	0.926961	0.0298163	31.0891	3.3855e-212	3.33235e-211
LINC01003	53.2761	-1.68821	0.0543035	-31.0884	3.45445e-212	3.39837e-211
ORMDL2	33.9999	-1.83586	0.0590648	-31.0822	4.1936e-212	4.12329e-211
ISG20L2	43.9784	-1.13356	0.0364877	-31.067	6.72084e-212	6.60459e-211
PTMS	579.355	-1.71184	0.0551037	-31.0658	6.98816e-212	6.86357e-211
ZNF593	27.4558	-2.47835	0.0797957	-31.0587	8.69258e-212	8.533e-211
PCNX2	514.047	0.907555	0.0292215	31.0578	8.96351e-212	8.79421e-211
IDE	296.793	0.842527	0.0271288	31.0566	9.29373e-212	9.11327e-211
C1orf53	10.9925	-2.05159	0.0660603	-31.0563	9.37831e-212	9.19125e-211
DANCR	98.3126	-2.07629	0.0668624	-31.0532	1.03292e-211	1.01177e-210
OARD1	146.465	-1.09779	0.0353575	-31.0482	1.20741e-211	1.18205e-210
MPI	56.9022	-1.39074	0.0447951	-31.0468	1.26055e-211	1.23341e-210
RNPC3	551.212	1.0784	0.0347425	31.0398	1.56486e-211	1.53035e-210
CHPF	88.0855	-1.80511	0.0581634	-31.0352	1.80553e-211	1.76476e-210
AL163051.1	7.80383	-2.11425	0.0681646	-31.0168	3.19949e-211	3.12557e-210
UBAC2	335.564	0.534351	0.0172354	31.0032	4.88382e-211	4.76842e-210
UQCRB	825.067	-2.73912	0.0883756	-30.9941	6.46852e-211	6.31228e-210
HNRNPUL1	175.136	-0.689144	0.0222409	-30.9854	8.48375e-211	8.27439e-210
UBE2A	98.9461	-1.33549	0.0431136	-30.9761	1.12995e-210	1.10148e-209
FASTK	85.029	-1.16357	0.0375678	-30.9726	1.26242e-210	1.22994e-209
ILVBL	81.0387	-1.26691	0.0409108	-30.9677	1.46992e-210	1.43134e-209
FBXL17	1570.6	0.884889	0.0285764	30.9657	1.56134e-210	1.51955e-209
KMT2A	662.887	0.608799	0.0196628	30.9619	1.75636e-210	1.70844e-209
MIPEP	216.612	0.936394	0.030245	30.9602	1.85023e-210	1.79878e-209
ERCC1	164.039	-1.46801	0.0474273	-30.9529	2.32276e-210	2.25696e-209
SMPD1	40.8977	-1.60138	0.0517822	-30.9253	5.46047e-210	5.30296e-209
XPO6	226.049	0.755948	0.0244475	30.9213	6.17442e-210	5.99311e-209
TMEM242	120.126	-0.96762	0.0313001	-30.9142	7.69136e-210	7.46152e-209
CHURC1	274.063	-1.08529	0.0351115	-30.9098	8.82218e-210	8.55398e-209
TMBIM6	528.745	-1.46348	0.0473493	-30.9082	9.26441e-210	8.97799e-209
MICU3	425.246	0.671206	0.0217191	30.9039	1.0592e-209	1.0259e-208
EBLN3P	88.5496	-1.27237	0.0411737	-30.9025	1.10685e-209	1.07149e-208
TRAPPC6A	66.5143	-1.3988	0.0452744	-30.896	1.35226e-209	1.30836e-208
Z98884.1	69.975	1.94534	0.0629669	30.8947	1.40641e-209	1.36003e-208
UBC	1856.36	-2.21124	0.0715809	-30.8914	1.55706e-209	1.50491e-208
EXOC2	298.465	0.764575	0.0247524	30.8889	1.68347e-209	1.62622e-208
NRBP2	78.4572	1.29508	0.0419294	30.8873	1.76993e-209	1.70883e-208
UQCC2	266.992	-1.26188	0.0408571	-30.8852	1.88591e-209	1.81984e-208
ABHD16A	80.4381	-1.05185	0.0340577	-30.8843	1.93856e-209	1.86966e-208
ZNF148	550.995	0.513317	0.0166252	30.8758	2.5206e-209	2.42972e-208
CISD3	47.5812	-1.86029	0.0602592	-30.8714	2.88999e-209	2.78431e-208
RPS23	1029.7	-3.04222	0.098603	-30.8532	5.07289e-209	4.8848e-208
SEM1	414.2	-1.08564	0.0352037	-30.8389	7.90052e-209	7.60357e-208
NME9	126.105	1.38218	0.0448219	30.8372	8.30819e-209	7.99168e-208
YWHAZ	488.941	-1.01131	0.0327975	-30.835	8.91064e-209	8.56666e-208
ELP3	150.869	0.664115	0.0215452	30.8243	1.23684e-208	1.18847e-207
MAP2K5	493.719	0.831024	0.0269646	30.819	1.45705e-208	1.39933e-207
NR2C2AP	12.3733	-1.74436	0.0566041	-30.8168	1.56166e-208	1.49899e-207
RERE	2742.2	0.752578	0.024424	30.813	1.7554e-208	1.68407e-207
DBP	312.448	-1.60322	0.0520333	-30.8114	1.8424e-208	1.76661e-207
DUSP26	135.488	-1.78798	0.0580374	-30.8073	2.09373e-208	2.00653e-207
KLHDC1	243.333	0.887708	0.0288181	30.8038	2.32877e-208	2.23061e-207
KIF1BP	119.719	-1.07196	0.0348016	-30.8021	2.45489e-208	2.35018e-207
MAGI2	4401.21	0.868713	0.0282101	30.7944	3.11265e-208	2.97831e-207
CEBPG	63.6557	-1.528	0.0496257	-30.7905	3.51517e-208	3.36169e-207
INVS	552.834	0.89503	0.0290872	30.7706	6.49064e-208	6.20399e-207
NDUFV3	266.87	-0.768662	0.0249819	-30.7688	6.85992e-208	6.55352e-207
HNRNPA1P48	7.1884	-2.839	0.0922871	-30.7627	8.26676e-208	7.89337e-207
MRPL23	48.231	-2.78747	0.0906131	-30.7624	8.35793e-208	7.97622e-207
GYG1	74.0942	-1.81101	0.0588867	-30.7541	1.07783e-207	1.02807e-206
MPHOSPH9	407.708	0.710739	0.0231182	30.7438	1.48143e-207	1.41229e-206
HSPH1	314.624	-2.99536	0.0974577	-30.735	1.93973e-207	1.84823e-206
SMS	281.137	-1.0188	0.0331714	-30.713	3.81102e-207	3.62935e-206
ODC1	85.9152	-1.96792	0.0640747	-30.7129	3.82416e-207	3.63996e-206
RPL7L1	104.526	-1.31663	0.0428935	-30.6953	6.56836e-207	6.2487e-206
ZMYM6	172.622	0.691024	0.0225166	30.6895	7.85736e-207	7.47107e-206
BMP2K	344.462	1.04633	0.0340986	30.6854	8.91662e-207	8.47382e-206
TFPT	34.5389	-1.54641	0.0504151	-30.6735	1.28453e-206	1.2201e-205
EFCAB6	191.173	1.11541	0.0363692	30.669	1.47542e-206	1.40068e-205
CD320	75.6392	-1.48974	0.0485956	-30.6558	2.21293e-206	2.09974e-205
VPS13D	661.54	0.752615	0.0245548	30.6505	2.60394e-206	2.46947e-205
C17orf58	31.8787	-1.75318	0.0572195	-30.6395	3.6439e-206	3.45392e-205
TMEM109	41.1179	-1.7337	0.0565882	-30.637	3.93275e-206	3.72576e-205
AHCTF1	214.317	0.82809	0.0270363	30.6289	5.04898e-206	4.78075e-205
RPS3A	1254.07	-2.90853	0.0949825	-30.6218	6.28125e-206	5.94446e-205
TAF9	72.9093	-1.60337	0.0523678	-30.6174	7.17845e-206	6.79002e-205
LUC7L3	1702.62	0.876476	0.0286402	30.603	1.11807e-205	1.05702e-204
AL356599.1	278.798	1.01386	0.0331366	30.5963	1.37008e-205	1.2946e-204
ALG3	29.3178	-1.54826	0.0506132	-30.59	1.66124e-205	1.5689e-204
FYTTD1	146.437	-0.848554	0.027749	-30.5796	2.28443e-205	2.15633e-204
SNF8	135.652	-0.894027	0.0292395	-30.576	2.55211e-205	2.40775e-204
SAR1A	133.878	-0.926817	0.0303149	-30.573	2.79711e-205	2.63752e-204
RBM5-AS1	10.6276	2.81582	0.0921191	30.5671	3.34629e-205	3.15373e-204
SLC30A7	141.595	0.819892	0.0268292	30.5597	4.20845e-205	3.96423e-204
NAA25	345.63	0.8098	0.0265128	30.5437	6.85596e-205	6.45476e-204
TMEM222	96.8547	-1.05592	0.0345828	-30.5332	9.45719e-205	8.89916e-204
NCL	303.587	-1.69714	0.0556098	-30.5187	1.47317e-204	1.38553e-203
THAP10	33.0217	-1.88736	0.0618503	-30.5149	1.65442e-204	1.55519e-203
LINC01504	16.6813	-2.76435	0.0905929	-30.514	1.69741e-204	1.59478e-203
RPL23	431.073	-2.63222	0.0862939	-30.5029	2.38152e-204	2.23636e-203
LDHA	1367.76	-2.2669	0.0743245	-30.5	2.60264e-204	2.44275e-203
GTF3C1	189.919	0.721488	0.0236556	30.4996	2.63756e-204	2.47425e-203
AP004609.3	15.2813	-1.90262	0.062383	-30.499	2.68989e-204	2.52203e-203
USP51	30.8499	-1.61502	0.0529639	-30.4929	3.23294e-204	3.02963e-203
HSPA1B	452.808	-4.1091	0.134761	-30.4918	3.34942e-204	3.13717e-203
CCDC59	103.16	-1.43093	0.0469309	-30.4902	3.51743e-204	3.29283e-203
RAD52	127.547	1.02643	0.0336656	30.489	3.64385e-204	3.40943e-203
ABHD11	34.6662	-1.32894	0.0435961	-30.483	4.3778e-204	4.09405e-203
IMMP2L	1562.39	1.03474	0.0339687	30.4617	8.38299e-204	7.83562e-203
CRK	151.018	-1.00076	0.0328559	-30.4592	9.05844e-204	8.46261e-203
SUMO4	15.2323	2.11854	0.0695616	30.4556	1.00848e-203	9.41661e-203
USP1	117.371	-1.23271	0.0404812	-30.4513	1.15075e-203	1.07395e-202
SCNM1	59.3577	-1.0718	0.0352051	-30.4446	1.41414e-203	1.31909e-202
POLE4	179.871	-1.82556	0.0599742	-30.4392	1.66694e-203	1.5541e-202
PAFAH1B2	160.105	-0.867399	0.0284998	-30.4353	1.87629e-203	1.74839e-202
RPL39	729.049	-3.40765	0.111969	-30.4339	1.95485e-203	1.82065e-202
ZRANB2-AS2	240.944	1.26916	0.0417458	30.402	5.162e-203	4.80518e-202
MIGA1	245.724	0.62831	0.0206731	30.3927	6.86535e-203	6.38751e-202
PDCL3	34.1696	-2.1756	0.071597	-30.3867	8.2403e-203	7.66285e-202
SDCBP2-AS1	98.7261	0.951297	0.0313122	30.381	9.7909e-203	9.10013e-202
SAT1	670.431	-1.50949	0.0496923	-30.3766	1.11831e-202	1.03888e-201
LAPTM4A	213.532	-1.94383	0.0640003	-30.3722	1.27917e-202	1.18771e-201
SNX2	278.585	-0.696505	0.0229338	-30.3702	1.35885e-202	1.26104e-201
MRPL17	59.041	-1.87187	0.0616428	-30.3663	1.52925e-202	1.41846e-201
CAPZB	553.109	-0.742575	0.024454	-30.3662	1.53386e-202	1.42201e-201
VPS29	295.642	-1.01793	0.0335287	-30.3599	1.85924e-202	1.72278e-201
TCEAL5	88.2782	-2.4933	0.0821621	-30.3461	2.83143e-202	2.62228e-201
BAZ2B	1329.2	0.79033	0.0260479	30.3415	3.25575e-202	3.01373e-201
RAB18	339.86	-0.964931	0.0318079	-30.3362	3.8248e-202	3.53867e-201
ZNF576	40.2409	-1.17657	0.0387845	-30.336	3.84297e-202	3.55367e-201
CAPRIN2	158.781	0.793754	0.0261656	30.3358	3.87246e-202	3.57912e-201
MBTD1	248.886	0.688351	0.0226947	30.3309	4.48257e-202	4.14091e-201
ALG13	189.679	0.93168	0.0307194	30.3287	4.8003e-202	4.43218e-201
CTSF	300.421	-1.3972	0.0460755	-30.3241	5.52271e-202	5.0966e-201
LAMP1	165.758	-0.929223	0.0306443	-30.3228	5.73348e-202	5.28841e-201
AC093158.1	17.0917	3.12723	0.103144	30.319	6.43794e-202	5.93518e-201
HSPB11	151.969	-0.861141	0.028405	-30.3165	6.94255e-202	6.39714e-201
PIAS2	347.38	0.787281	0.0259695	30.3157	7.12726e-202	6.56401e-201
ZNF688	39.7879	-1.21015	0.0399434	-30.2967	1.26741e-201	1.16666e-200
NONO	162.896	-0.971564	0.0320724	-30.2929	1.42273e-201	1.30897e-200
ANKRD13C	379.758	0.611284	0.0201792	30.2927	1.42937e-201	1.31441e-200
TMED1	34.6612	-1.81537	0.0599519	-30.2804	2.07628e-201	1.90833e-200
CRAMP1	133.118	0.814795	0.0269103	30.2782	2.22194e-201	2.04118e-200
ALS2	177.487	0.712601	0.0235422	30.2691	2.92625e-201	2.68683e-200
AK6	101.097	-1.51949	0.0502118	-30.2615	3.68049e-201	3.37765e-200
AC244090.1	31.3148	-2.38678	0.0789011	-30.2503	5.1773e-201	4.7489e-200
ETV2	7.27368	-2.53658	0.0838571	-30.2488	5.40783e-201	4.95786e-200
ATP6V1G2	207.836	-2.6401	0.0872877	-30.2459	5.89997e-201	5.40632e-200
ARFRP1	64.1444	-1.09333	0.0361511	-30.2435	6.35492e-201	5.82028e-200
ALG13-AS1	34.8844	2.54856	0.084279	30.2396	7.15635e-201	6.55098e-200
SFT2D1	97.6128	-0.940016	0.0310919	-30.2335	8.60593e-201	7.87397e-200
SERP2	116.191	-1.3714	0.0453799	-30.2204	1.27619e-200	1.16706e-199
TKT	201.35	-1.45664	0.0482187	-30.2091	1.79772e-200	1.64317e-199
PDCD6	189.283	-0.937143	0.0310345	-30.1968	2.61156e-200	2.38583e-199
MSRB2	166.141	-1.4158	0.0468867	-30.1962	2.65731e-200	2.42642e-199
SMCHD1	696.597	0.665223	0.0220391	30.1838	3.86037e-200	3.52317e-199
FAM160B2	63.4803	0.955802	0.0316669	30.183	3.96324e-200	3.61524e-199
GPR108	83.4089	-0.993615	0.0329251	-30.178	4.60442e-200	4.19801e-199
STK3	495.29	0.929895	0.0308186	30.1732	5.33118e-200	4.85819e-199
SH3BGRL3	133.592	-2.89989	0.0961218	-30.1689	6.06004e-200	5.51962e-199
TMEM232	584.76	1.08234	0.0358787	30.1667	6.47216e-200	5.89203e-199
SUCLG1	230.73	-0.938787	0.0311219	-30.1648	6.851e-200	6.2338e-199
[truncated: 16,182 more rows]

## Sheet: Rod
symbol	baseMean	log2FoldChange	lfcSE	stat	pvalue	padj
MLF1	915.101	-2.04603	0.0782599	-26.144	1.15311e-150	2.09635e-146
RBM18	239.958	-1.25832	0.053575	-23.4871	5.51929e-122	5.01704e-118
EAPP	872.507	-1.161	0.0499949	-23.2224	2.70456e-119	1.63896e-115
IFT22	635.885	-1.88811	0.0827107	-22.8279	2.42494e-115	9.0241e-112
EIF5	1038.21	-1.50683	0.0660111	-22.8269	2.48187e-115	9.0241e-112
CFAP20	298.273	-1.5883	0.0706671	-22.4758	7.15815e-112	2.16892e-108
PPP1R2	673.976	-1.08168	0.0485957	-22.2587	9.29933e-110	2.41517e-106
SDHB	744.631	-1.04133	0.0481335	-21.6342	8.569e-104	1.94731e-100
MYLIP	130.151	-3.13123	0.145908	-21.4602	3.66356e-102	7.40038e-99
RSL1D1	308.89	-1.83513	0.0868048	-21.1408	3.35178e-99	6.09353e-96
CCNG1	207.808	-1.77901	0.0848264	-20.9724	1.17272e-97	1.93819e-94
ZNF669	94.1817	-1.78119	0.0851241	-20.9247	3.19252e-97	4.83667e-94
ARL4A	334.745	-3.27645	0.158272	-20.7014	3.36662e-95	4.70809e-92
ERG28	449.299	-1.79917	0.0869758	-20.6859	4.63803e-95	6.02281e-92
CITED2	581.603	-3.38296	0.163594	-20.679	5.35579e-95	6.49122e-92
COQ10B	344.346	-1.47081	0.0715015	-20.5703	5.06715e-94	5.75755e-91
XBP1	265.676	-1.91147	0.0935325	-20.4364	7.93991e-93	8.49104e-90
RNF139	220.376	-2.26706	0.111177	-20.3914	1.993e-92	2.01293e-89
STRAP	959.994	-1.38951	0.0682338	-20.364	3.48829e-92	3.17086e-89
NAPA	945.663	-1.10838	0.0544245	-20.3654	3.39004e-92	3.17086e-89
SLC25A33	1078.9	-1.41353	0.0697189	-20.2747	2.14903e-91	1.86045e-88
C1orf43	756.343	-1.45102	0.0720292	-20.1448	2.98725e-90	2.46855e-87
UBE2J1	384.542	-1.24663	0.0618949	-20.1411	3.22365e-90	2.54808e-87
BCAS2	512.71	-1.82764	0.0908358	-20.1202	4.9079e-90	3.71773e-87
RNPS1	600.228	-0.902509	0.0451375	-19.9947	6.12913e-89	4.45711e-86
HERPUD1	404.78	-1.7744	0.0889099	-19.9573	1.29512e-88	9.05591e-86
ZNF503	105.283	-2.51632	0.126176	-19.943	1.72528e-88	1.16169e-85
IFRD1	443.07	-1.28479	0.0648073	-19.8248	1.81903e-87	1.18107e-84
GNL2	137.393	-1.3735	0.0700642	-19.6034	1.44548e-85	9.06168e-83
HNRNPF	1519.78	-1.35496	0.0693063	-19.5503	4.0982e-85	2.48351e-82
AC008403.3	85.4952	-4.73847	0.243664	-19.4468	3.10448e-84	1.82063e-81
COPS8	719.212	-1.60907	0.0827921	-19.4351	3.90013e-84	2.20032e-81
LIN37	176.792	-1.56001	0.080273	-19.4338	3.99397e-84	2.20032e-81
C9orf116	117.839	-2.37878	0.123453	-19.2687	9.84001e-83	5.26151e-80
VCP	841.22	-1.32871	0.0691015	-19.2285	2.13893e-82	1.11102e-79
SQSTM1	822.218	-1.2651	0.0659091	-19.1946	4.10269e-82	2.07186e-79
TIMM17A	423.392	-1.41645	0.073852	-19.1795	5.48594e-82	2.69552e-79
TMEM8B	149.733	1.56807	0.0821974	19.0769	3.93164e-81	1.88098e-78
RABIF	113.237	-1.55167	0.081538	-19.03	9.62063e-81	4.48469e-78
RUVBL2	311.959	-1.90641	0.100608	-18.9489	4.51299e-80	2.05115e-77
GPATCH3	76.6236	-1.49341	0.0790258	-18.8977	1.19068e-79	5.27965e-77
IP6K2	1106.27	-0.990559	0.0529732	-18.6992	5.02073e-78	2.17326e-75
ZFAND2A	169.352	-2.54297	0.136193	-18.6719	8.3875e-78	3.54616e-75
KIF9	682.236	-1.08736	0.0584644	-18.5987	3.28995e-77	1.35935e-74
TRAPPC8	1459.45	1.11721	0.0601256	18.5813	4.55395e-77	1.8398e-74
GOT1	861.985	-1.21854	0.0658866	-18.4945	2.28637e-76	9.03615e-74
BRIX1	294.066	-1.83446	0.0993879	-18.4576	4.53207e-76	1.75304e-73
RPF1	258.569	-1.43064	0.077904	-18.3642	2.54374e-75	9.63443e-73
PSMD7	449.661	-1.21207	0.0660331	-18.3554	2.98619e-75	1.10794e-72
DPH3	155.161	-1.70553	0.0929677	-18.3453	3.59655e-75	1.30771e-72
CCT4	798.893	-1.80617	0.0985536	-18.3268	5.05952e-75	1.76889e-72
NPAS4	32.6288	-5.94835	0.324563	-18.3273	5.01461e-75	1.76889e-72
MOB4	499.486	-1.03872	0.0567017	-18.319	5.8359e-75	2.00182e-72
AVPI1	112.459	-1.89339	0.103468	-18.2993	8.37901e-75	2.82093e-72
IER2	308.511	-3.10626	0.170588	-18.2091	4.368e-74	1.44382e-71
SPATA2L	144	-2.26457	0.124593	-18.1758	8.02774e-74	2.60615e-71
VPS13C	2386.43	1.33017	0.0736526	18.0601	6.5746e-73	2.09695e-70
BUD23	347.008	-1.11742	0.0619825	-18.028	1.17443e-72	3.68124e-70
C14orf119	231.034	-2.09964	0.116747	-17.9845	2.57561e-72	7.93636e-70
KPNA2	136.18	-2.01755	0.112217	-17.979	2.84399e-72	8.61728e-70
NKIRAS1	585.803	-0.956563	0.0532978	-17.9475	5.02057e-72	1.49629e-69
NGDN	276.9	-0.978314	0.0545739	-17.9264	7.33777e-72	2.15162e-69
COPS3	395.967	-1.01573	0.0567928	-17.8848	1.54993e-71	4.47266e-69
TOPORS	205.742	-1.48868	0.0836732	-17.7916	8.21677e-71	2.33408e-68
RBM7	93.6356	-1.65374	0.0931225	-17.7588	1.47351e-70	4.12128e-68
NXT1	127.566	-2.1872	0.123644	-17.6895	5.04801e-70	1.3905e-67
ARL2BP	326.441	-1.47737	0.0835702	-17.6782	6.17566e-70	1.67572e-67
AC008083.3	5.546	-5.30765	0.300825	-17.6436	1.13898e-69	3.04509e-67
MTERF2	312.157	-1.10698	0.0627498	-17.6411	1.19067e-69	3.13716e-67
POLR2C	375.215	-1.31032	0.0742937	-17.637	1.28115e-69	3.32734e-67
POLDIP2	203.789	-1.08464	0.0615519	-17.6216	1.68306e-69	4.30957e-67
RHBDD2	309.282	-1.4969	0.0849987	-17.6108	2.03419e-69	5.13632e-67
RASA1	2131.98	1.04018	0.0591898	17.5737	3.91601e-69	9.75247e-67
ZCCHC10	463.573	-0.994237	0.0566148	-17.5614	4.86292e-69	1.1947e-66
UAP1	195.224	-1.30723	0.0744828	-17.5508	5.86753e-69	1.42229e-66
CRY1	980.259	-1.71005	0.0976381	-17.5142	1.11642e-68	2.6706e-66
PHF5A	180.656	-1.93929	0.111023	-17.4674	2.53847e-68	5.99343e-66
CDC42EP3	309.612	-2.0041	0.115007	-17.4259	5.24881e-68	1.22338e-65
UGDH	411.061	-1.64762	0.0945906	-17.4185	5.97708e-68	1.37548e-65
PABPC1	860.629	-1.91782	0.110132	-17.4138	6.48515e-68	1.47375e-65
RBM33	1378.41	1.11002	0.0637992	17.3986	8.45148e-68	1.89689e-65
KARS	400.083	-1.49794	0.0861474	-17.3881	1.01478e-67	2.24985e-65
HSPA9	1015.53	-0.958544	0.0551624	-17.3768	1.23743e-67	2.71042e-65
CCDC59	241.953	-1.66934	0.0961358	-17.3644	1.53442e-67	3.32092e-65
ERCC1	436.613	-1.10621	0.0637556	-17.3509	1.94324e-67	4.15624e-65
PPP1CA	159.203	-1.95008	0.112525	-17.3303	2.77931e-67	5.87534e-65
C9orf78	185.105	-1.80774	0.104356	-17.3228	3.16485e-67	6.61344e-65
RBM26	1550.08	0.80578	0.0466802	17.2617	9.13737e-67	1.8877e-64
NT5C3A	738.162	-0.763024	0.0442405	-17.2472	1.17536e-66	2.4009e-64
ENOPH1	423.959	-1.217	0.0706381	-17.2287	1.61677e-66	3.26588e-64
ZNF426	157.86	-1.11774	0.06488	-17.2278	1.6423e-66	3.281e-64
YTHDF2	415.155	-0.954087	0.0554579	-17.2038	2.48683e-66	4.91419e-64
PPP1R15A	119.221	-3.35276	0.195376	-17.1605	5.24538e-66	1.02539e-63
MKRN1	387.055	-0.845192	0.0493008	-17.1436	7.01915e-66	1.35753e-63
STRN3	1594.63	0.883122	0.0516533	17.0971	1.55986e-65	2.98508e-63
SS18L2	283.126	-1.31858	0.0772372	-17.0718	2.40616e-65	4.55667e-63
GDE1	189.928	-1.34198	0.0787384	-17.0436	3.90225e-65	7.3137e-63
AKIRIN1	438.065	-1.00998	0.059349	-17.0176	6.0769e-65	1.12733e-62
PDHB	193.709	-1.27404	0.0748862	-17.013	6.5734e-65	1.20711e-62
TWISTNB	103.983	-1.66676	0.0980831	-16.9933	9.19998e-65	1.67256e-62
GADD45A	315.96	-2.6131	0.154387	-16.9257	2.90887e-64	5.23596e-62
DNAJB1	877.676	-3.47314	0.2056	-16.8927	5.09059e-64	9.07323e-62
TBCB	478.388	-1.73829	0.103038	-16.8703	7.44284e-64	1.3137e-61
C4orf46	281.926	-1.62928	0.0970798	-16.7829	3.25511e-63	5.69018e-61
HEXB	282.904	-1.24542	0.0742499	-16.7733	3.82421e-63	6.62135e-61
SNX3	630.56	-1.52364	0.0910011	-16.7431	6.3583e-63	1.09051e-60
DNAJC7	1032.84	-0.696314	0.0416289	-16.7267	8.37299e-63	1.42263e-60
PLCG2	76.8504	-4.0364	0.241573	-16.7088	1.1305e-62	1.90301e-60
LINC01504	22.1412	-2.94653	0.176607	-16.6841	1.70945e-62	2.85118e-60
CENPBD1	82.545	-1.53367	0.0922894	-16.618	5.15964e-62	8.52748e-60
TSEN34	251.417	-1.70906	0.1029	-16.6089	6.00827e-62	9.84056e-60
SMARCB1	554.335	-0.898247	0.0542233	-16.5657	1.2332e-61	2.00175e-59
KBTBD4	145.031	-1.34667	0.0813453	-16.555	1.47386e-61	2.37121e-59
AMD1	584.364	-1.37365	0.0830338	-16.5432	1.79214e-61	2.85799e-59
GAMT	258.009	-1.32212	0.0799335	-16.5402	1.88429e-61	2.97881e-59
CAPZA2	1275.58	-0.726672	0.043976	-16.5243	2.45369e-61	3.84553e-59
PPP4C	234.917	-1.32183	0.0800377	-16.5151	2.85851e-61	4.44169e-59
SKIL	607.809	-0.969929	0.0587788	-16.5013	3.58806e-61	5.52805e-59
ACAT1	458.785	-0.878034	0.053407	-16.4404	9.82115e-61	1.50041e-58
GSKIP	1215.53	-1.25906	0.0766143	-16.4337	1.09717e-60	1.66221e-58
DEDD2	167.488	-2.0371	0.124122	-16.4121	1.5673e-60	2.33554e-58
CXADR	279.856	-1.15313	0.0702593	-16.4125	1.55689e-60	2.33554e-58
EIF3D	352.63	-1.07469	0.0655457	-16.396	2.04354e-60	3.02045e-58
NUMA1	618.196	0.838946	0.0511982	16.3863	2.39748e-60	3.51502e-58
EMC10	447.113	-1.01788	0.0621213	-16.3853	2.43555e-60	3.54227e-58
SESN2	117.726	-1.88301	0.114977	-16.3773	2.77866e-60	4.00921e-58
STX16	749.385	0.802052	0.0490614	16.3479	4.49971e-60	6.44132e-58
PPP2CA	776.954	-0.803053	0.04918	-16.3289	6.15099e-60	8.73632e-58
ARMC8	1300.5	0.574979	0.0353391	16.2703	1.60243e-59	2.2583e-57
TMEM11	244.347	-1.49711	0.0920306	-16.2675	1.67812e-59	2.34679e-57
HIST2H2BE	287.898	-3.21014	0.197425	-16.2601	1.89573e-59	2.63087e-57
RAB5C	303.603	-1.33671	0.0822187	-16.258	1.96102e-59	2.70086e-57
ELOC	464.19	-1.64504	0.101375	-16.2274	3.22858e-59	4.4132e-57
CASQ1	193.282	-2.08359	0.12866	-16.1946	5.50847e-59	7.47343e-57
TBRG1	368.119	-1.29964	0.0804355	-16.1576	1.00394e-58	1.35197e-56
NOA1	135.884	-1.00794	0.0624827	-16.1315	1.53284e-58	2.04905e-56
SYF2	406.148	-1.46761	0.0910829	-16.1129	2.0714e-58	2.74876e-56
HEXIM2	86.5081	-1.50007	0.093207	-16.0939	2.81487e-58	3.70829e-56
UBE2L3	468.467	-1.09342	0.068009	-16.0775	3.666e-58	4.79482e-56
HDAC2	316.88	-0.940577	0.0586554	-16.0356	7.20467e-58	9.35578e-56
GPKOW	97.7214	-1.34376	0.0838361	-16.0284	8.09122e-58	1.04325e-55
TEX14	215.488	-2.54556	0.159175	-15.9922	1.44767e-57	1.85342e-55
MTRNR2L12	89.422	-6.73435	0.421203	-15.9884	1.54037e-57	1.95832e-55
EMC4	263.044	-2.21574	0.13892	-15.9497	2.86078e-57	3.61174e-55
YWHAQ	920.312	-1.11645	0.0700555	-15.9366	3.53016e-57	4.42609e-55
SNRPB2	264.181	-1.74121	0.109404	-15.9154	4.95098e-57	6.16499e-55
DUSP14	303.198	-1.13508	0.0713623	-15.9058	5.77444e-57	7.14145e-55
ZNF574	143.674	-1.65139	0.103893	-15.8951	6.8533e-57	8.41844e-55
LEPROTL1	336.816	-1.08117	0.0681118	-15.8734	9.68543e-57	1.18175e-54
RBM23	1073.53	-1.13321	0.0714426	-15.8618	1.16492e-56	1.41188e-54
MFAP1	342.877	-1.23275	0.0778352	-15.838	1.70221e-56	2.04942e-54
NQO1	135.335	-1.38327	0.0873591	-15.8343	1.80594e-56	2.16e-54
PGD	375.779	-1.14831	0.0727939	-15.7749	4.63408e-56	5.50638e-54
XRCC6	785.346	-0.964929	0.0612106	-15.7641	5.49615e-56	6.48831e-54
PDE6G	30492.4	-1.70261	0.108051	-15.7576	6.09451e-56	7.14828e-54
ZNF445	335.284	0.705823	0.0448033	15.7538	6.46715e-56	7.53672e-54
ABHD3	416.493	-3.12752	0.198816	-15.7307	9.31441e-56	1.07857e-53
EMSY	1227.08	0.916111	0.0582998	15.7138	1.21656e-55	1.39981e-53
COX5A	1035.3	-1.84487	0.117513	-15.6993	1.53034e-55	1.74979e-53
SARAF	1491.12	-1.64459	0.104776	-15.6963	1.60274e-55	1.82112e-53
FEM1A	70.2994	-1.19395	0.0761341	-15.6822	2.00332e-55	2.26214e-53
RAD1	220.995	-0.913143	0.0582637	-15.6726	2.32935e-55	2.61404e-53
SNRPG	565.592	-2.10773	0.134522	-15.6683	2.49153e-55	2.77299e-53
SENP7	1118.63	0.897213	0.0572639	15.668	2.50149e-55	2.77299e-53
MRPS7	428.554	-1.48099	0.0945999	-15.6553	3.05803e-55	3.36939e-53
EIF3L	356.134	-1.56136	0.0997428	-15.6539	3.12559e-55	3.42308e-53
SMS	684.52	-0.923088	0.0590217	-15.6398	3.89926e-55	4.24482e-53
LSM5	430.935	-1.32734	0.084968	-15.6216	5.18474e-55	5.61063e-53
CCDC173	390.672	-1.5155	0.097153	-15.5991	7.38186e-55	7.94096e-53
CCDC96	40.8048	-2.33269	0.149575	-15.5955	7.81573e-55	8.35823e-53
SF3B2	812.378	-0.982789	0.0630403	-15.5898	8.53342e-55	9.07237e-53
G6PD	260.232	-1.44256	0.09256	-15.5851	9.18655e-55	9.70997e-53
OCIAD2	573.787	-1.59087	0.102347	-15.5438	1.75248e-54	1.84163e-52
LACTB2	233.647	-1.12445	0.0723558	-15.5406	1.84362e-54	1.92627e-52
UQCRQ	1324.35	-2.59779	0.167256	-15.5318	2.11373e-54	2.18339e-52
MCRS1	188.168	-1.1957	0.0769823	-15.5321	2.10309e-54	2.18339e-52
CDKN2AIP	139.625	-1.76726	0.113861	-15.5212	2.49519e-54	2.56286e-52
NUDC	773.443	-1.58753	0.102302	-15.5181	2.61695e-54	2.67281e-52
OCRL	233.111	0.947293	0.06112	15.4989	3.52925e-54	3.58445e-52
MID1IP1	88.9117	-1.89221	0.12209	-15.4985	3.55302e-54	3.58855e-52
SPTY2D1	175.072	-1.1288	0.0729138	-15.4812	4.64377e-54	4.6643e-52
AC129492.4	56.6378	-2.81716	0.182446	-15.4411	8.66556e-54	8.65604e-52
DOCK7	1214.19	0.875283	0.056795	15.4113	1.37455e-53	1.36554e-51
LYSMD3	315.629	-1.13123	0.0734365	-15.4042	1.53449e-53	1.51614e-51
FAM229B	329.243	-1.5008	0.0974437	-15.4017	1.59374e-53	1.56617e-51
UBL7	119.264	-1.47412	0.0957918	-15.3888	1.94705e-53	1.90308e-51
ZNF791	617.077	-0.709419	0.0461215	-15.3815	2.17746e-53	2.11691e-51
PHAX	423.406	-1.36257	0.088614	-15.3765	2.35289e-53	2.27529e-51
CCDC157	244.685	-1.57488	0.102475	-15.3685	2.66186e-53	2.56046e-51
NBAS	1988.58	1.05546	0.0687013	15.363	2.89869e-53	2.77359e-51
ZNF672	152.082	-1.18658	0.077406	-15.3294	4.86667e-53	4.63225e-51
ATG4D	187.2	-1.12	0.0731012	-15.3212	5.51797e-53	5.22483e-51
OS9	377.99	-0.96693	0.0631222	-15.3184	5.7635e-53	5.42904e-51
DCAF7	1196.77	-0.6748	0.0440527	-15.318	5.79786e-53	5.43325e-51
ZNF280D	1289.39	1.07013	0.0698887	15.3119	6.37133e-53	5.94004e-51
KCTD5	125.734	-1.26302	0.0825253	-15.3047	7.11773e-53	6.60206e-51
HNRNPA0	438.007	-2.1946	0.143551	-15.288	9.19872e-53	8.48897e-51
DROSHA	816.573	0.77568	0.0508197	15.2634	1.34102e-52	1.2313e-50
BRF2	68.8832	-1.53599	0.100697	-15.2535	1.55963e-52	1.42483e-50
NFU1	488.191	-0.86575	0.056832	-15.2335	2.12003e-52	1.92711e-50
NME1	1482.05	-2.34403	0.153998	-15.2212	2.55713e-52	2.31286e-50
FAM149B1	574.209	0.725596	0.0476718	15.2206	2.57964e-52	2.32167e-50
COA7	43.9263	-1.59784	0.105038	-15.2119	2.94658e-52	2.63886e-50
FTX	9214.55	0.867266	0.0570278	15.2078	3.13995e-52	2.79825e-50
REV1	942.767	0.62118	0.0408611	15.2022	3.41839e-52	3.03153e-50
ODC1	327.176	-1.84367	0.121426	-15.1835	4.55041e-52	4.01585e-50
MRPL18	394.365	-1.9279	0.127137	-15.164	6.12526e-52	5.37958e-50
NDUFB9	718.278	-1.84253	0.121847	-15.1216	1.16644e-51	1.01952e-49
ZRANB3	1569.68	0.726111	0.0480873	15.0998	1.62323e-51	1.41198e-49
HERC4	1293.2	0.753222	0.0499164	15.0897	1.89362e-51	1.63933e-49
PHKB	1790.83	0.914577	0.060623	15.0863	1.99294e-51	1.71714e-49
SPATA33	307.335	-0.928169	0.0615395	-15.0825	2.11154e-51	1.81074e-49
IGBP1	377.274	-1.08123	0.0717479	-15.0699	2.55671e-51	2.18221e-49
USP34	6037.93	0.77151	0.0512659	15.0492	3.49546e-51	2.96951e-49
GATAD1	856.287	1.01132	0.0672102	15.0472	3.60308e-51	3.0467e-49
ZMYM4	2047.69	0.643604	0.0428322	15.0262	4.94747e-51	4.16412e-49
ANKRD10	1453.59	0.963949	0.0641572	15.0248	5.05017e-51	4.23097e-49
HAUS2	299.801	-1.11817	0.0744976	-15.0095	6.35981e-51	5.30373e-49
PLK3	18.485	-3.2484	0.216454	-15.0073	6.57576e-51	5.45878e-49
NELFE	208.022	-1.21346	0.0809961	-14.9817	9.66746e-51	7.98883e-49
DMXL1	1288.15	0.793059	0.0529762	14.9701	1.15163e-50	9.47355e-49
ABCA5	2323.47	0.67066	0.0448534	14.9523	1.50543e-50	1.23283e-48
AL133243.2	73.4369	2.02038	0.135134	14.951	1.53526e-50	1.25161e-48
MPV17L2	55.4704	-1.7826	0.119237	-14.95	1.55725e-50	1.26387e-48
MLLT6	1508.91	1.0538	0.0705902	14.9285	2.15107e-50	1.73806e-48
CHTOP	403.565	-0.930709	0.0623636	-14.9239	2.30361e-50	1.85308e-48
MME	19.0176	-3.43179	0.230113	-14.9135	2.69277e-50	2.15659e-48
TOB2	1556.61	-1.18284	0.0793178	-14.9127	2.72611e-50	2.17371e-48
UQCR11	940.008	-2.32155	0.155683	-14.912	2.75353e-50	2.18599e-48
SNRPC	252.907	-1.41418	0.0949224	-14.8983	3.38172e-50	2.67303e-48
CEP192	1179.26	0.762767	0.0512199	14.892	3.71439e-50	2.92327e-48
GPN1	114.606	-1.1118	0.074665	-14.8906	3.79593e-50	2.9618e-48
FAM13A-AS1	1079.23	1.44837	0.0972674	14.8906	3.79408e-50	2.9618e-48
DUSP26	393.768	-1.50655	0.101204	-14.8863	4.04807e-50	3.14504e-48
STAT5B	615.981	0.668101	0.0448838	14.8851	4.11757e-50	3.18542e-48
NDUFAF4	219.969	-1.37136	0.0921509	-14.8817	4.3335e-50	3.33826e-48
HSPE1	931.686	-2.95352	0.198482	-14.8806	4.40787e-50	3.38122e-48
MIR7-3HG	128.55	-2.31463	0.155551	-14.8801	4.43691e-50	3.3892e-48
LINC00906	3.62379	-3.89933	0.262392	-14.8607	5.92939e-50	4.5103e-48
GPANK1	211.03	-1.0563	0.0711077	-14.8549	6.46367e-50	4.89623e-48
TRIAP1	53.5024	-2.477	0.166921	-14.8394	8.1512e-50	6.14892e-48
VPS18	63.479	-1.55055	0.104802	-14.7951	1.57534e-49	1.18346e-47
YWHAE	1947.34	-1.18904	0.0804829	-14.7739	2.16005e-49	1.61603e-47
OAZ2	920.392	-1.40837	0.0953444	-14.7714	2.23889e-49	1.66816e-47
TMEM199	166.121	-1.18139	0.0800305	-14.7617	2.58699e-49	1.91965e-47
PRADC1	172.794	-1.4793	0.100274	-14.7525	2.96545e-49	2.19154e-47
ZNF780B	1889.3	0.991199	0.0671901	14.7522	2.97931e-49	2.19287e-47
ZFAS1	629.234	-1.85913	0.126028	-14.7518	2.99743e-49	2.19731e-47
AC004816.1	121.795	-1.20901	0.0819732	-14.7489	3.1272e-49	2.28323e-47
ADGRV1	5497.16	0.868187	0.0589371	14.7307	4.09285e-49	2.97632e-47
TMEM192	301.596	-0.951133	0.064594	-14.7248	4.4693e-49	3.23713e-47
PRPF38B	457.552	-0.98951	0.0672539	-14.713	5.31598e-49	3.8351e-47
CCDC12	574.163	-0.936665	0.0636788	-14.7092	5.62612e-49	4.0428e-47
RIBC1	117.91	-1.32308	0.0900671	-14.6899	7.47812e-49	5.35245e-47
THAP1	112.441	-1.80234	0.122712	-14.6876	7.7464e-49	5.52272e-47
CDC37L1	304.328	-0.670162	0.0456844	-14.6694	1.01278e-48	7.19234e-47
UQCC1	734.335	0.652004	0.0444556	14.6664	1.05776e-48	7.45353e-47
LINC01278	1067.35	0.899476	0.0613287	14.6665	1.0572e-48	7.45353e-47
HSPBP1	110.801	-1.38729	0.0946158	-14.6624	1.12266e-48	7.88028e-47
HMOX2	295.212	-1.07946	0.0736957	-14.6475	1.39823e-48	9.77683e-47
AC019163.1	21.3427	-2.36533	0.161498	-14.6462	1.42501e-48	9.92594e-47
UBE2D1	263.307	-1.1076	0.0756314	-14.6447	1.45548e-48	1.00995e-46
SSR2	289.613	-1.59035	0.108616	-14.642	1.5146e-48	1.04697e-46
MED9	192.33	-0.914256	0.0624444	-14.6411	1.53525e-48	1.05723e-46
ABHD5	277.978	-0.938228	0.0640838	-14.6406	1.54585e-48	1.06051e-46
NCKAP1	1408.85	0.998181	0.068273	14.6204	2.08105e-48	1.42231e-46
AL157392.3	241.833	1.31786	0.0902132	14.6083	2.48566e-48	1.69249e-46
DAZAP2	237.521	-1.22021	0.0835891	-14.5978	2.90177e-48	1.96844e-46
ILF2	249.016	-1.39748	0.0958101	-14.5859	3.45139e-48	2.33257e-46
OXA1L	235.041	-1.75184	0.120116	-14.5846	3.52033e-48	2.37036e-46
SPATA6	1619.43	0.866079	0.0594523	14.5676	4.51238e-48	3.02713e-46
RNF34	698.891	-0.822263	0.0564554	-14.5648	4.7023e-48	3.14294e-46
TBCC	284.881	-2.03846	0.140209	-14.5387	6.88824e-48	4.58711e-46
TRA2B	1309.3	-0.851235	0.0585874	-14.5293	7.89954e-48	5.24137e-46
ZNHIT2	86.5742	-2.1044	0.1449	-14.5231	8.64644e-48	5.71608e-46
CEBPG	134.591	-1.21397	0.0836118	-14.5191	9.16823e-48	6.03907e-46
GLO1	648.873	-1.33488	0.0919753	-14.5134	9.95914e-48	6.53636e-46
KHDRBS1	1212.14	-0.932973	0.0643203	-14.5051	1.12466e-47	7.35481e-46
ARF4	490.954	-0.845104	0.058281	-14.5005	1.20242e-47	7.83512e-46
TMEM230	925.428	-1.25919	0.0868784	-14.4937	1.3279e-47	8.62184e-46
DZANK1	641.934	0.635403	0.0438741	14.4824	1.5652e-47	1.01265e-45
BRWD1	3665.08	0.763989	0.0527927	14.4715	1.83503e-47	1.18301e-45
FAM136A	160.481	-1.52656	0.105512	-14.4681	1.92657e-47	1.23764e-45
CAP1	349.785	-0.923133	0.0638341	-14.4614	2.1233e-47	1.35921e-45
NEK7	2525.36	0.893444	0.0618009	14.4568	2.27101e-47	1.44867e-45
OSCP1	314.831	-0.773735	0.0535235	-14.456	2.29819e-47	1.46088e-45
LYRM7	277.305	-0.934205	0.0646304	-14.4546	2.3456e-47	1.48582e-45
TSG101	535.307	-0.692596	0.0479833	-14.4341	3.15784e-47	1.99338e-45
C16orf46	223.788	-1.03973	0.0720441	-14.4319	3.26197e-47	2.05199e-45
EDEM1	89.2087	1.10845	0.0768076	14.4315	3.27882e-47	2.05548e-45
VTI1B	524.691	-0.756288	0.0524393	-14.4222	3.75454e-47	2.34562e-45
HSPH1	977.977	-3.95412	0.274326	-14.414	4.22671e-47	2.63156e-45
NUBP1	147.393	-1.18956	0.0827485	-14.3756	7.36646e-47	4.57072e-45
VPS39	384.312	0.769009	0.0534979	14.3745	7.47567e-47	4.62271e-45
PHF21A	2604.4	0.873822	0.0607968	14.3728	7.66415e-47	4.7232e-45
PRMT5	101.849	-1.30936	0.0911455	-14.3656	8.50956e-47	5.22648e-45
RPL31	1419.51	-3.11154	0.216641	-14.3626	8.88062e-47	5.43602e-45
NFKBIE	24.2799	-2.24405	0.156331	-14.3544	9.99499e-47	6.09762e-45
BRMS1	78.5879	-1.44547	0.100765	-14.345	1.14524e-46	6.96336e-45
TPMT	202.247	-1.27976	0.0893412	-14.3244	1.54026e-46	9.33396e-45
PPT1	286.697	-1.05385	0.0735907	-14.3205	1.63032e-46	9.84689e-45
ARPP19	782.092	-0.875866	0.0611743	-14.3176	1.69999e-46	1.02337e-44
FHL2	432.502	-0.849219	0.0593141	-14.3173	1.70595e-46	1.02357e-44
PSMB5	345.357	-1.81616	0.126884	-14.3136	1.80078e-46	1.07691e-44
GABARAPL1	1479.4	-1.19232	0.0833264	-14.309	1.92211e-46	1.1457e-44
MPHOSPH6	456.385	-1.12319	0.0785222	-14.3041	2.06331e-46	1.22585e-44
PCNX1	1660.18	1.02175	0.0714715	14.296	2.31841e-46	1.37292e-44
ID2	202.759	-2.9827	0.208802	-14.2848	2.7205e-46	1.6058e-44
CEP44	608.167	0.790916	0.055445	14.2649	3.62165e-46	2.1308e-44
PAIP2	1024.82	-1.22855	0.0861645	-14.2581	3.98907e-46	2.3394e-44
YIPF5	392.474	-1.17847	0.0826603	-14.2567	4.07004e-46	2.3792e-44
PA2G4	324.671	-1.6033	0.112465	-14.256	4.11549e-46	2.39806e-44
RGMB	37.7404	-1.66885	0.117086	-14.2532	4.28274e-46	2.48754e-44
PDIA3	718.938	-1.23246	0.086502	-14.2477	4.63157e-46	2.68159e-44
OAT	332.773	-1.23609	0.0867639	-14.2466	4.70745e-46	2.71687e-44
LYAR	334.025	-0.98465	0.0691461	-14.2401	5.1626e-46	2.97013e-44
SPRY1	274.885	-1.43206	0.10058	-14.2381	5.31833e-46	3.05007e-44
TACO1	134.862	-0.986363	0.0693085	-14.2315	5.8424e-46	3.34009e-44
MOSPD1	140.99	-0.943142	0.0662893	-14.2277	6.17025e-46	3.51646e-44
EIF4A1	973.374	-1.57391	0.110699	-14.2179	7.09741e-46	4.03221e-44
KEAP1	120.451	-1.17607	0.082788	-14.2057	8.43985e-46	4.77995e-44
PTGES3	1610.68	-1.84858	0.130252	-14.1924	1.0216e-45	5.76792e-44
MRPS18B	410.317	-1.37715	0.0971191	-14.18	1.21791e-45	6.855e-44
XPO7	755.795	0.805806	0.0568424	14.1761	1.28735e-45	7.22346e-44
ATXN7	1070.28	0.936909	0.0661346	14.1667	1.47263e-45	8.23765e-44
ZSWIM3	171.12	-1.08681	0.0767353	-14.1631	1.5505e-45	8.64663e-44
GMNN	108.397	-1.37678	0.0972156	-14.1622	1.57083e-45	8.73321e-44
KMT2A	2305	0.729997	0.0515568	14.1591	1.64139e-45	9.09768e-44
TM2D2	187.811	-2.20398	0.155717	-14.1537	1.77204e-45	9.79198e-44
PDIK1L	190.62	-1.07667	0.0761128	-14.1457	1.98477e-45	1.09343e-43
ISG20L2	87.8534	-1.12654	0.0796469	-14.1442	2.02724e-45	1.11345e-43
MED19	412.366	-1.16861	0.082641	-14.1408	2.12948e-45	1.16608e-43
TEX30	77.9782	-1.56983	0.111035	-14.1381	2.2106e-45	1.20687e-43
AL353759.1	118.212	-4.40664	0.311974	-14.125	2.66371e-45	1.44989e-43
HMCES	236.018	-0.611842	0.0433315	-14.12	2.85839e-45	1.55121e-43
CACYBP	617.884	-1.85619	0.13152	-14.1134	3.1415e-45	1.69977e-43
COPS4	579.198	-0.831655	0.0589569	-14.1062	3.48042e-45	1.87757e-43
TUBGCP3	549.355	0.75676	0.0537135	14.0888	4.44927e-45	2.39313e-43
MCL1	399.952	-1.45861	0.103577	-14.0824	4.87147e-45	2.61249e-43
IDH3A	487.022	-0.747032	0.0530754	-14.0749	5.41651e-45	2.89624e-43
MRPL4	217.268	-1.20553	0.0857102	-14.0652	6.21761e-45	3.31484e-43
SLC25A5	982.27	-2.66323	0.189512	-14.0531	7.37206e-45	3.91883e-43
EIF4A3	294.984	-1.44336	0.102734	-14.0495	7.75937e-45	4.11269e-43
ANAPC13	227.504	-2.18159	0.155424	-14.0364	9.3368e-45	4.93439e-43
DNAJB6	1289.76	-1.35456	0.0965881	-14.0241	1.11028e-44	5.8507e-43
DMTF1	727.432	1.03308	0.0737379	14.0102	1.35029e-44	7.09486e-43
Z83843.1	134.006	1.58525	0.113189	14.0053	1.44684e-44	7.58025e-43
MCUR1	4120.38	-0.702536	0.0501688	-14.0034	1.48492e-44	7.75744e-43
COMMD9	171.122	-1.07119	0.07654	-13.9952	1.66692e-44	8.68329e-43
BTG1	1642.75	-1.63308	0.116881	-13.9721	2.30707e-44	1.19836e-42
TBC1D19	1227.62	0.630408	0.0451628	13.9586	2.7895e-44	1.44482e-42
NKIRAS2	143.627	-1.26546	0.090665	-13.9576	2.82847e-44	1.46084e-42
SNRPD2	395.976	-2.43673	0.174594	-13.9565	2.87038e-44	1.47829e-42
SRP68	223.588	-0.647027	0.0464254	-13.9369	3.77937e-44	1.94093e-42
PPP1CC	1171.52	-1.0156	0.0729234	-13.9269	4.34759e-44	2.22646e-42
MEX3B	19.4279	-2.47501	0.177781	-13.9217	4.67967e-44	2.38978e-42
LENG1	94.7265	-1.66671	0.119748	-13.9185	4.89291e-44	2.49168e-42
PTPN6	30.812	-2.55275	0.183449	-13.9153	5.11342e-44	2.5967e-42
GRPEL1	284.321	-1.48275	0.106579	-13.9122	5.33946e-44	2.70394e-42
PPCS	188.509	-1.54142	0.110818	-13.9096	5.54259e-44	2.79901e-42
ZNHIT3	244.997	-1.13578	0.0816697	-13.907	5.74192e-44	2.89164e-42
LINC01220	12.0839	-2.67685	0.192494	-13.9061	5.81513e-44	2.92042e-42
TRAC	698.366	-2.02698	0.145809	-13.9016	6.19188e-44	3.10106e-42
YBX1	3888.69	-2.9477	0.212087	-13.8986	6.46141e-44	3.22716e-42
CHCHD10	1959.14	-1.63576	0.117709	-13.8966	6.63976e-44	3.30714e-42
CAPRIN2	503.39	0.807453	0.0581235	13.892	7.0802e-44	3.51689e-42
ARMC7	43.3514	-1.40812	0.101385	-13.8888	7.40264e-44	3.66703e-42
PPP1R3D	36.8819	-1.5374	0.110728	-13.8844	7.87413e-44	3.88999e-42
FAM174A	570.546	-0.96203	0.0693159	-13.8789	8.50174e-44	4.18866e-42
AC012447.1	76.9155	-1.92113	0.1385	-13.871	9.49863e-44	4.66717e-42
ZSCAN30	252.393	1.04302	0.0752559	13.8597	1.11164e-43	5.44733e-42
BSG	2421.84	-0.936284	0.0675594	-13.8587	1.1274e-43	5.50972e-42
HEY2	65.6902	-1.62506	0.117294	-13.8546	1.19326e-43	5.81594e-42
NFKBIA	202.271	-1.99213	0.14387	-13.8468	1.33096e-43	6.46975e-42
PKIB	846.211	-1.15433	0.0833704	-13.8458	1.3487e-43	6.53851e-42
IFT88	4164.84	0.641615	0.0463464	13.8439	1.385e-43	6.6966e-42
NDUFAF1	147.98	-1.13599	0.0820721	-13.8413	1.4355e-43	6.92238e-42
EIF1B	1089.19	-1.67955	0.12136	-13.8394	1.47478e-43	7.09298e-42
DUSP1	816.673	-3.26417	0.235945	-13.8345	1.57933e-43	7.57581e-42
AP001767.3	124.919	1.92711	0.139344	13.8299	1.68235e-43	8.0487e-42
GSK3B	2335.3	0.650342	0.0470593	13.8196	1.94076e-43	9.26062e-42
CCDC180	380.059	0.974009	0.070511	13.8136	2.11081e-43	1.00457e-41
KLF11	61.6201	-2.56037	0.185383	-13.8113	2.17993e-43	1.03476e-41
ALKBH2	48.8099	-1.58609	0.114919	-13.8018	2.48707e-43	1.17747e-41
RPGRIP1L	197.568	0.981249	0.0711082	13.7994	2.57052e-43	1.21382e-41
AUH	2843.25	0.895377	0.0649003	13.7962	2.6864e-43	1.26525e-41
TBL1XR1	4357.69	1.26293	0.0915595	13.7936	2.78526e-43	1.30745e-41
HUWE1	1117.65	0.663268	0.0480857	13.7935	2.79037e-43	1.30745e-41
LSM2	242.761	-1.50003	0.108761	-13.792	2.84852e-43	1.33126e-41
RND1	23.474	-3.00925	0.218302	-13.7848	3.14675e-43	1.46687e-41
RGS2	151.296	-3.50545	0.254438	-13.7773	3.49288e-43	1.62406e-41
CNIH1	554.952	-1.11323	0.080854	-13.7684	3.9505e-43	1.82748e-41
PSMC4	267.549	-1.20823	0.0877527	-13.7685	3.94072e-43	1.82748e-41
SNRPD1	398.229	-1.52622	0.110907	-13.7612	4.36004e-43	2.01182e-41
MRPL12	110.589	-1.70247	0.123727	-13.7599	4.44159e-43	2.04426e-41
ZBTB2	67.6165	-1.34005	0.0973936	-13.7591	4.4914e-43	2.06196e-41
ZMYND11	1072.72	0.540769	0.0393088	13.7569	4.62696e-43	2.11884e-41
UROS	350.16	-0.891582	0.064852	-13.748	5.23917e-43	2.39317e-41
SACM1L	496.405	0.592396	0.0431255	13.7366	6.13173e-43	2.79385e-41
ANKRD54	172.161	-0.796034	0.0579509	-13.7364	6.14974e-43	2.79506e-41
H3F3B	5653	-1.91137	0.139277	-13.7235	7.34508e-43	3.33002e-41
EIF1	3589.7	-2.14136	0.156045	-13.7227	7.42543e-43	3.35807e-41
CFAP44	792.199	1.09119	0.0795243	13.7215	7.54927e-43	3.4056e-41
RPL4	1459.35	-3.0156	0.219932	-13.7116	8.65772e-43	3.89597e-41
ZNF667-AS1	394.252	-1.0923	0.0796828	-13.7081	9.0778e-43	4.07493e-41
GTF2B	363.809	-0.732848	0.0534653	-13.707	9.22142e-43	4.1292e-41
C12orf65	367.587	-0.812901	0.0593284	-13.7017	9.915e-43	4.42886e-41
GGNBP2	662.925	-0.70394	0.0514032	-13.6945	1.09554e-42	4.88158e-41
BCL10	81.0093	-1.39723	0.102032	-13.694	1.10248e-42	4.90049e-41
CDK5RAP2	706.153	0.782678	0.0571889	13.6858	1.23378e-42	5.47075e-41
FARSA	196.512	-1.04129	0.0761074	-13.6818	1.30395e-42	5.76784e-41
SEZ6L2	816.762	-0.952207	0.0696094	-13.6793	1.35015e-42	5.95771e-41
MAFB	21.1595	-4.19146	0.30643	-13.6783	1.36763e-42	6.02022e-41
SDE2	107.376	-1.09046	0.0797496	-13.6735	1.46193e-42	6.4198e-41
ASTE1	105.922	-1.07501	0.0786398	-13.6701	1.53284e-42	6.71497e-41
LMOD3	38.42	-1.81502	0.132788	-13.6686	1.56441e-42	6.83676e-41
MYL12A	215.373	-1.90632	0.139565	-13.659	1.78367e-42	7.7763e-41
AHSA1	462.354	-2.39088	0.175152	-13.6503	2.01e-42	8.74204e-41
SLC39A6	279.126	-1.2774	0.0936245	-13.6438	2.19732e-42	9.53396e-41
ABCF2	145.961	-0.982673	0.0720278	-13.643	2.223e-42	9.62242e-41
MRPL49	107.668	-1.30911	0.0959708	-13.6407	2.29423e-42	9.90716e-41
PSME3	127.999	-0.913397	0.0669877	-13.6353	2.46995e-42	1.06407e-40
RAB39A	113.259	-3.42561	0.251322	-13.6304	2.64268e-42	1.13579e-40
GLOD4	313.17	-0.703123	0.0515927	-13.6283	2.71669e-42	1.16484e-40
MRPL20	515.055	-1.28284	0.0942194	-13.6155	3.2391e-42	1.38557e-40
MSS51	59.3649	1.28072	0.0940687	13.6148	3.27143e-42	1.39612e-40
MRPS36	506.568	-1.25098	0.0918971	-13.6129	3.3587e-42	1.43e-40
UQCRC2	1661.19	-0.609401	0.0447728	-13.611	3.44677e-42	1.46407e-40
PGF	34.5406	-2.24839	0.165256	-13.6055	3.7145e-42	1.57412e-40
TRAPPC3	214.366	-1.14822	0.0844229	-13.6008	3.96142e-42	1.67485e-40
KAT5	427.985	-1.00356	0.0738451	-13.5901	4.58665e-42	1.93469e-40
IMP3	171.535	-1.94357	0.143058	-13.5858	4.86108e-42	2.04571e-40
PYURF	272.951	-1.97905	0.145678	-13.5851	4.90873e-42	2.06099e-40
USP48	1314.22	0.652097	0.0480189	13.58	5.26198e-42	2.20421e-40
KTI12	26.6654	-2.02829	0.149449	-13.5717	5.891e-42	2.46203e-40
PAN3	2396.76	0.681755	0.0502468	13.5681	6.18689e-42	2.57976e-40
UBR5	2083.73	0.806989	0.0594844	13.5664	6.33696e-42	2.63629e-40
JUN	891.689	-3.45197	0.254524	-13.5624	6.68799e-42	2.76965e-40
DBF4	159.007	-0.86835	0.0640258	-13.5625	6.68167e-42	2.76965e-40
FLYWCH2	201.648	-1.5017	0.110786	-13.555	7.39719e-42	3.05638e-40
IGF1R	3543.89	0.851617	0.0628745	13.5447	8.515e-42	3.51027e-40
SLC25A20	101.903	-1.42778	0.105603	-13.5203	1.18652e-41	4.8803e-40
POP4	110.195	-1.7858	0.132088	-13.5197	1.19612e-41	4.90866e-40
SRSF8	308.161	-1.34002	0.0992023	-13.5079	1.40471e-41	5.75173e-40
RBM8A	430.407	-1.84093	0.136311	-13.5054	1.45403e-41	5.94028e-40
NMT1	1162.26	-1.00401	0.0744923	-13.478	2.10797e-41	8.59259e-40
RAB33B	134.727	-1.22777	0.0911107	-13.4755	2.17908e-41	8.86258e-40
TMEM165	963.252	-0.719286	0.0533904	-13.4722	2.28007e-41	9.25261e-40
TMEM9B	372.359	-1.29501	0.0961423	-13.4698	2.35594e-41	9.5392e-40
KIAA0586	1383.37	0.908066	0.0674325	13.4663	2.46969e-41	9.97753e-40
NDUFS3	330.56	-1.54339	0.114656	-13.461	2.65334e-41	1.06957e-39
NDUFS8	561.47	-1.58371	0.117662	-13.4599	2.69256e-41	1.08298e-39
HNRNPM	1816.41	-0.853409	0.063422	-13.456	2.83716e-41	1.13862e-39
DYNLT1	550.31	-0.850976	0.0632577	-13.4525	2.97545e-41	1.19149e-39
ZNF385A	1466.74	-1.29144	0.096002	-13.4522	2.98699e-41	1.19271e-39
RPS15A	2682.81	-2.7713	0.206012	-13.4521	2.99162e-41	1.19271e-39
KCTD2	233.528	1.28	0.095179	13.4483	3.14962e-41	1.25295e-39
TAF11	425.351	-0.60507	0.0449935	-13.4479	3.16588e-41	1.25667e-39
ETFRF1	535.603	-0.993317	0.0739353	-13.4349	3.7737e-41	1.49468e-39
SLIRP	1259.21	-1.20685	0.089845	-13.4326	3.8941e-41	1.53902e-39
TMEM183A	186.572	-1.00658	0.0749391	-13.432	3.92494e-41	1.54784e-39
MAPK9	359.8	0.894093	0.0665721	13.4304	4.00974e-41	1.57786e-39
MED13	1545.63	0.662791	0.0494019	13.4163	4.85346e-41	1.90574e-39
NIPA2	226.201	-0.837272	0.0624207	-13.4134	5.0487e-41	1.97813e-39
C9orf129	90.4441	2.18916	0.163224	13.4119	5.14732e-41	2.00812e-39
PABPN1	702.149	1.03817	0.0774058	13.412	5.14102e-41	2.00812e-39
TSC1	440.816	0.709509	0.0529037	13.4113	5.1888e-41	2.01996e-39
SF3B6	423.418	-1.99789	0.14911	-13.3988	6.14842e-41	2.38842e-39
TTC21B	782.513	0.83767	0.0625541	13.3911	6.8128e-41	2.64087e-39
C22orf23	32.3644	-1.51867	0.113426	-13.3891	6.99928e-41	2.70738e-39
PPP1R7	515.748	-0.958407	0.0715947	-13.3866	7.24635e-41	2.797e-39
SNU13	655.526	-1.71936	0.128581	-13.3719	8.8303e-41	3.40116e-39
TFPI2	767.197	-2.26078	0.169111	-13.3686	9.22085e-41	3.54408e-39
ARFIP1	1702.01	0.560373	0.0419272	13.3654	9.63094e-41	3.69389e-39
SH2D3C	43.8899	-1.6876	0.126274	-13.3646	9.73254e-41	3.725e-39
SEPHS2	191.249	-2.00927	0.150434	-13.3566	1.08462e-40	4.14254e-39
C17orf49	372.862	-1.98389	0.148665	-13.3447	1.27196e-40	4.83769e-39
FOSB	181.655	-6.24516	0.467986	-13.3448	1.27083e-40	4.83769e-39
PPP1R11	272.59	-1.08789	0.0815248	-13.3442	1.27963e-40	4.85671e-39
ATP1A3	2212	-1.13585	0.0851477	-13.3398	1.35902e-40	5.14729e-39
ARL3	3431.33	-1.01416	0.0760301	-13.3389	1.37519e-40	5.1977e-39
ATM	2500.93	0.580916	0.0435867	13.3278	1.59505e-40	6.0162e-39
RFX3	3348.27	0.964358	0.0723605	13.3271	1.6094e-40	6.05772e-39
SUMO1	719.271	-1.36493	0.102468	-13.3205	1.75889e-40	6.60674e-39
ANGEL2	405.253	0.62228	0.0467539	13.3097	2.03367e-40	7.62312e-39
MRPS35	309.753	-0.761854	0.0572492	-13.3077	2.08858e-40	7.81283e-39
DHPS	676.492	-1.45726	0.109539	-13.3036	2.20692e-40	8.23857e-39
NDUFB1	1102.23	-1.99254	0.149847	-13.2972	2.40331e-40	8.95332e-39
HSPA1A	3377.43	-4.85106	0.3649	-13.2942	2.5009e-40	9.29781e-39
EIF3K	1020.24	-1.31415	0.0988712	-13.2915	2.59392e-40	9.62397e-39
CTR9	627.551	-0.798726	0.0601045	-13.2889	2.68354e-40	9.9362e-39
CIRBP	3478.82	-1.2875	0.0969128	-13.2852	2.82269e-40	1.04302e-38
RACK1	1746.79	-2.23662	0.168465	-13.2764	3.17161e-40	1.16957e-38
ZMAT5	142.244	-0.904466	0.0681464	-13.2724	3.34699e-40	1.23175e-38
TP53RK	60.9176	-1.45869	0.109928	-13.2695	3.47813e-40	1.27742e-38
DPM1	404.063	-0.769261	0.0579756	-13.2687	3.51629e-40	1.28884e-38
MMADHC	282.196	-1.18691	0.0895389	-13.2558	4.17669e-40	1.52781e-38
ADRM1	165.829	-1.93986	0.146501	-13.2413	5.0631e-40	1.84834e-38
METAP2	708.272	-0.737612	0.0557071	-13.2409	5.09357e-40	1.85573e-38
UBE3C	2014.15	0.69012	0.0521252	13.2397	5.17883e-40	1.88302e-38
CYB5R1	237.24	-1.31321	0.0992165	-13.2358	5.45363e-40	1.97898e-38
C12orf29	170.028	-1.26701	0.0957281	-13.2355	5.47244e-40	1.98185e-38
DDX17	6568.6	0.883189	0.0667651	13.2283	6.02296e-40	2.17689e-38
SOWAHC	96.6768	-1.9181	0.145005	-13.2278	6.06523e-40	2.18781e-38
DNAAF2	261.525	-0.981087	0.0741745	-13.2267	6.14941e-40	2.21379e-38
PPP1R8	187.838	-1.08229	0.0818735	-13.2191	6.80793e-40	2.44601e-38
RAB3A	401.206	-2.34217	0.177217	-13.2164	7.05653e-40	2.53033e-38
HDDC3	215.376	-1.35289	0.102376	-13.2149	7.19356e-40	2.57439e-38
SVIP	506.605	-1.29769	0.0982171	-13.2125	7.43255e-40	2.65469e-38
AL691403.1	256.647	-2.97148	0.22505	-13.2036	8.35987e-40	2.98005e-38
ALKBH4	129.708	-1.056	0.0800376	-13.1939	9.518e-40	3.38625e-38
UBE2I	379.151	-0.607895	0.046137	-13.1759	1.20798e-39	4.28928e-38
ATP1A1	1692.83	-1.28258	0.097355	-13.1743	1.23444e-39	4.37467e-38
TALDO1	350.149	-1.41096	0.107357	-13.1427	1.87477e-39	6.631e-38
TUB	3127.22	0.847397	0.0645327	13.1313	2.17965e-39	7.69438e-38
TMEM131	884.87	0.836616	0.0637177	13.13	2.21544e-39	7.80557e-38
DNAJC13	579.768	1.02459	0.0780372	13.1294	2.23298e-39	7.85213e-38
AVL9	1234.63	0.674945	0.0514211	13.1258	2.34184e-39	8.21905e-38
ADPRM	503.809	-0.866199	0.0660097	-13.1223	2.45369e-39	8.59501e-38
JTB	328.392	-1.5902	0.121192	-13.1213	2.48629e-39	8.69245e-38
SH3BP5-AS1	200.052	1.45527	0.110944	13.1171	2.62776e-39	9.16943e-38
EIF3J	536.783	-0.801181	0.0610842	-13.116	2.66561e-39	9.28367e-38
BAD	292.128	-1.75795	0.134117	-13.1076	2.97751e-39	1.03501e-37
IMMP2L	4112.66	0.979441	0.0747843	13.0969	3.43112e-39	1.19042e-37
TBPL1	283.392	-1.01386	0.0774385	-13.0924	3.63844e-39	1.25994e-37
UQCRFS1	644.291	-1.56223	0.119336	-13.091	3.70617e-39	1.28095e-37
VAMP2	3965.13	-2.1383	0.163369	-13.0888	3.81616e-39	1.31647e-37
HMGN4	208.142	-1.20969	0.0924313	-13.0875	3.88427e-39	1.33743e-37
TTN-AS1	742.174	1.02324	0.078283	13.0711	4.81951e-39	1.65412e-37
UBE2B	1390.4	-0.534404	0.0408847	-13.071	4.82223e-39	1.65412e-37
CREB1	1294.22	0.538164	0.0411789	13.0689	4.95648e-39	1.69696e-37
ARF6	144.892	-2.2051	0.168977	-13.0497	6.38269e-39	2.18115e-37
FAM53C	300.808	-1.50206	0.115108	-13.0491	6.43002e-39	2.19321e-37
ADD3	3900.67	0.532237	0.0408101	13.0418	7.07551e-39	2.40885e-37
EPG5	639.513	0.670007	0.051376	13.0412	7.1279e-39	2.42215e-37
RCVRN	17462.2	-2.15024	0.164893	-13.0402	7.22387e-39	2.45019e-37
VPS13B	2573.75	0.879001	0.0674142	13.0388	7.36027e-39	2.4918e-37
MEAF6	450.583	-1.09269	0.083838	-13.0333	7.90795e-39	2.67224e-37
NDUFB6	559.09	-1.53122	0.117502	-13.0314	8.10541e-39	2.73388e-37
PUM2	4169.06	0.663819	0.0509566	13.0271	8.57581e-39	2.88185e-37
EPB41L2	24104.1	0.654961	0.0502762	13.0273	8.56241e-39	2.88185e-37
MORF4L2	911.178	-0.96375	0.0740371	-13.0171	9.77875e-39	3.28003e-37
DMAC2	252.484	-1.21069	0.093013	-13.0164	9.87545e-39	3.30637e-37
NOSIP	298.805	-1.00257	0.0770838	-13.0062	1.12817e-38	3.77025e-37
SNAP29	179.336	-0.754204	0.0580556	-12.9911	1.37488e-38	4.5863e-37
DNAJA1	963.348	-2.5168	0.193775	-12.9882	1.42652e-38	4.74985e-37
RBM42	144.856	-1.72037	0.132476	-12.9863	1.46274e-38	4.86153e-37
B9D2	35.8757	-1.42152	0.109569	-12.9737	1.72532e-38	5.72377e-37
LSM10	90.6957	-1.52738	0.117775	-12.9687	1.8422e-38	6.10039e-37
ABHD8	535.737	-0.68762	0.0530248	-12.9679	1.86066e-38	6.15033e-37
SAMM50	217.119	-0.65111	0.05021	-12.9677	1.86457e-38	6.15205e-37
TSN	330.279	-0.780456	0.0601899	-12.9666	1.89323e-38	6.23531e-37
AAMP	266.614	-1.19735	0.0923547	-12.9647	1.94021e-38	6.37848e-37
TUBA1B	4708.24	-1.79685	0.138602	-12.9641	1.95553e-38	6.41449e-37
CORO7	177.405	-1.32268	0.102028	-12.964	1.95822e-38	6.41449e-37
RAB3GAP1	2386.61	0.613586	0.0473458	12.9597	2.0715e-38	6.77337e-37
CARD19	170.869	-1.22909	0.0948426	-12.9593	2.08133e-38	6.79329e-37
ENY2	645.675	-0.842099	0.0649895	-12.9575	2.13172e-38	6.94529e-37
AL139423.1	856.116	1.8699	0.144315	12.9571	2.14248e-38	6.96785e-37
DPY30	379.141	-1.16178	0.0896748	-12.9554	2.18888e-38	7.10603e-37
MRPL27	269.71	-1.25715	0.0970953	-12.9476	2.42352e-38	7.85377e-37
DNTTIP2	141.539	-1.19739	0.0925746	-12.9343	2.8816e-38	9.32161e-37
HMGN2	2645.75	-1.53725	0.118878	-12.9313	2.99578e-38	9.67375e-37
TTC17	2253.59	0.664563	0.0514985	12.9045	4.24463e-38	1.36822e-36
GNGT1	16684.6	-2.10439	0.163076	-12.9044	4.25341e-38	1.36862e-36
UBALD1	151.221	-1.07861	0.0835871	-12.904	4.27353e-38	1.37266e-36
MAP7D1	259.55	-0.906784	0.0703165	-12.8958	4.75539e-38	1.52474e-36
BUD31	199.11	-2.01114	0.155978	-12.8938	4.8773e-38	1.56108e-36
LYRM2	272.158	-1.04016	0.0806987	-12.8894	5.1627e-38	1.64952e-36
MLF2	407.198	-1.21624	0.0943661	-12.8885	5.2253e-38	1.6666e-36
HIST1H2BG	22.0885	-4.84496	0.37639	-12.8722	6.45552e-38	2.05537e-36
MRPL14	407.274	-1.38716	0.107787	-12.8695	6.68544e-38	2.12309e-36
RALY	1062.58	-0.966609	0.075109	-12.8694	6.6916e-38	2.12309e-36
TMEM109	226.491	-1.28962	0.100227	-12.867	6.8991e-38	2.18512e-36
UQCRC1	540.307	-1.15375	0.0897801	-12.8508	8.50708e-38	2.68972e-36
MED29	179.519	-0.881778	0.0686237	-12.8495	8.66172e-38	2.73386e-36
EML6	2519.99	1.05431	0.0820536	12.849	8.70849e-38	2.74385e-36
FUCA1	78.8831	-1.02884	0.0800767	-12.8482	8.80774e-38	2.77032e-36
CYC1	438.618	-1.77475	0.138149	-12.8466	8.98299e-38	2.82057e-36
SPAG7	431.626	-1.3479	0.10493	-12.8457	9.08953e-38	2.8491e-36
MPZL3	107.492	-1.28664	0.100163	-12.8454	9.13145e-38	2.85731e-36
HIRIP3	230.507	-1.35443	0.105455	-12.8437	9.32698e-38	2.91348e-36
PRPF38A	288.922	-0.664535	0.0517431	-12.843	9.41824e-38	2.93694e-36
STK16	83.1482	-1.27965	0.0996816	-12.8374	1.01215e-37	3.15084e-36
TIMM17B	261.683	-1.72004	0.13403	-12.8333	1.06787e-37	3.3186e-36
CHAC2	193.305	-1.21824	0.0949971	-12.8239	1.20425e-37	3.73046e-36
UBR3	3291.33	0.772771	0.0602601	12.8239	1.2045e-37	3.73046e-36
EIF3I	248.581	-1.80563	0.14086	-12.8187	1.28877e-37	3.98466e-36
PPFIA2	11323.7	0.881144	0.068743	12.8179	1.30099e-37	4.01561e-36
ORC3	1358.28	0.656329	0.05123	12.8114	1.41493e-37	4.35989e-36
FTH1	16621.7	-2.9128	0.227371	-12.8107	1.4277e-37	4.39182e-36
ARPC2	619.963	-0.90217	0.0704439	-12.8069	1.49959e-37	4.60516e-36
ADCY6	111.645	1.03146	0.0805483	12.8054	1.52846e-37	4.68589e-36
MRPS16	257.361	-1.03697	0.0810071	-12.8009	1.61968e-37	4.95719e-36
MAGOH	297.513	-1.21065	0.0945805	-12.8003	1.63411e-37	4.99297e-36
PAM16	324.4	-0.90298	0.0705516	-12.7989	1.66382e-37	5.0752e-36
APOO	628.765	-0.613337	0.0479304	-12.7964	1.71671e-37	5.22778e-36
SWSAP1	37.6579	-1.3285	0.103822	-12.796	1.72716e-37	5.25079e-36
GPATCH2L	1169.47	0.593118	0.0463551	12.7951	1.74649e-37	5.3007e-36
INTS3	267.999	0.855191	0.0668503	12.7926	1.80267e-37	5.4621e-36
SELENOF	1106.69	-1.07266	0.0838638	-12.7906	1.85158e-37	5.60094e-36
IRF1	168.891	-2.4452	0.191227	-12.7869	1.94046e-37	5.86005e-36
GGCT	164.079	-1.22735	0.0959898	-12.7863	1.95683e-37	5.89969e-36
AFDN	976.108	0.840483	0.0657432	12.7843	2.00558e-37	6.03667e-36
ZDHHC4	120.865	-1.4534	0.113694	-12.7835	2.02772e-37	6.0932e-36
POLR2L	410.582	-2.40233	0.187933	-12.7829	2.04282e-37	6.12846e-36
QARS	131.816	-1.21942	0.0954058	-12.7814	2.08378e-37	6.24104e-36
DDIT3	774.359	-1.77574	0.138959	-12.7789	2.14953e-37	6.42736e-36
CEP95	1493.19	0.732193	0.0573142	12.7751	2.2595e-37	6.7451e-36
RPS17	1316.24	-3.56794	0.279454	-12.7676	2.48808e-37	7.41531e-36
OSER1	198.359	-0.807015	0.0632192	-12.7654	2.55991e-37	7.6169e-36
NR2C2	847.419	0.600958	0.0470818	12.7641	2.60032e-37	7.72447e-36
AIMP1	518.295	-0.933127	0.0731261	-12.7605	2.72381e-37	8.07811e-36
AL355075.4	44.026	-2.81387	0.220663	-12.7519	3.04259e-37	9.00883e-36
WDR27	605.027	0.903723	0.070871	12.7517	3.05115e-37	9.0195e-36
ZNF281	186.851	-1.42708	0.111918	-12.7511	3.0744e-37	9.07346e-36
SMIM7	838.697	-0.698728	0.0548003	-12.7504	3.09964e-37	9.13315e-36
HSP90B1	608.251	-1.60147	0.125614	-12.7491	3.15284e-37	9.27487e-36
SERBP1	777.752	-1.26923	0.0995574	-12.7487	3.16932e-37	9.30827e-36
SURF6	130.421	-1.11264	0.0872857	-12.7471	3.23656e-37	9.49044e-36
ASF1A	126.469	-1.36142	0.106836	-12.7431	3.40411e-37	9.96567e-36
LRIF1	1089.27	-1.07036	0.0840251	-12.7386	3.61003e-37	1.05515e-35
TMEM138	1034.94	-1.10496	0.0867478	-12.7377	3.65161e-37	1.06559e-35
CNBP	1129.74	-1.3849	0.108729	-12.7371	3.67652e-37	1.07114e-35
RPF2	191.411	-0.99017	0.0777478	-12.7357	3.74667e-37	1.08983e-35
ZNF678	332.475	0.856064	0.0672289	12.7336	3.84771e-37	1.11565e-35
TECR	968.855	-1.46723	0.115225	-12.7336	3.84586e-37	1.11565e-35
UNC5C	5238.15	0.953715	0.0749076	12.7319	3.93251e-37	1.13661e-35
EIF3M	487.596	-0.800992	0.062912	-12.7319	3.92957e-37	1.13661e-35
PCGF1	69.6082	-1.8938	0.148749	-12.7315	3.9534e-37	1.14084e-35
THG1L	63.6801	-1.30895	0.102844	-12.7275	4.1602e-37	1.19861e-35
AP1B1	1120.04	-0.833747	0.0655171	-12.7256	4.26058e-37	1.22559e-35
ASCC3	1340.67	0.923987	0.0726177	12.724	4.35014e-37	1.24938e-35
GCH1	36.9651	-2.58055	0.202974	-12.7137	4.96345e-37	1.42327e-35
HACD3	980.214	-0.693914	0.0545936	-12.7105	5.1672e-37	1.47937e-35
RAE1	231.956	-0.596443	0.0469434	-12.7056	5.5067e-37	1.57409e-35
ZNF736	1351.22	0.997644	0.0785247	12.7048	5.55801e-37	1.58626e-35
NCSTN	156.827	-1.04395	0.0821769	-12.7037	5.63748e-37	1.60642e-35
PHF3	1659.62	0.816939	0.0643154	12.7021	5.75796e-37	1.63818e-35
ZNF148	1790.5	0.592458	0.0466469	12.7009	5.84454e-37	1.66022e-35
ATG2B	686.478	1.0038	0.0790684	12.6954	6.2747e-37	1.77962e-35
USP1	734.81	-0.999477	0.0787429	-12.6929	6.47263e-37	1.8329e-35
MAD2L1BP	126.97	-1.49918	0.118136	-12.6904	6.68791e-37	1.89092e-35
DHRS7	553.819	-1.25865	0.0992347	-12.6836	7.29383e-37	2.05904e-35
C1orf50	210.304	-0.912151	0.0719231	-12.6823	7.41109e-37	2.08889e-35
PCNP	838.778	-1.21985	0.0962067	-12.6795	7.68445e-37	2.16259e-35
SNAPC5	215.85	-0.944402	0.0745346	-12.6707	8.59876e-37	2.41616e-35
TIGAR	167.922	-1.16954	0.092315	-12.669	8.78325e-37	2.46419e-35
SPRTN	278.607	-1.03974	0.0820844	-12.6667	9.04299e-37	2.53315e-35
ANKRD28	1984.93	0.997695	0.0787775	12.6647	9.27594e-37	2.59441e-35
SNX2	833.412	-0.500583	0.0395322	-12.6627	9.52247e-37	2.65927e-35
CNOT1	723.389	0.79908	0.0631135	12.661	9.72608e-37	2.71197e-35
CCDC181	1071.06	-1.04986	0.0829285	-12.6598	9.87768e-37	2.75002e-35
MAPRE1	172.412	-0.760895	0.0601257	-12.6551	1.04868e-36	2.91515e-35
BCL7B	163.552	-1.28278	0.101382	-12.6529	1.07782e-36	2.99158e-35
HSPA6	455.437	-8.20675	0.648794	-12.6492	1.12966e-36	3.13067e-35
CCT6A	444.324	-1.15538	0.0913487	-12.648	1.14727e-36	3.17464e-35
MRPS14	308.249	-0.878432	0.0694545	-12.6476	1.1537e-36	3.18757e-35
SRSF3	878.561	-1.53874	0.121679	-12.6459	1.17868e-36	3.25167e-35
ARPC5	197.795	-1.20484	0.0953227	-12.6396	1.27624e-36	3.51547e-35
ACTR10	797.307	-0.638269	0.0505143	-12.6354	1.34673e-36	3.70401e-35
SYAP1	329.678	-1.24995	0.0989263	-12.6351	1.35193e-36	3.7127e-35
KANSL3	807.622	0.948044	0.0750427	12.6334	1.38171e-36	3.78875e-35
MRPS18C	278.245	-1.16597	0.0923012	-12.6323	1.40174e-36	3.8379e-35
EIF3H	1056.54	-0.981444	0.0777251	-12.6271	1.4965e-36	4.09119e-35
MTCL1	4987.98	1.12406	0.0890235	12.6266	1.5063e-36	4.11178e-35
AP4E1	358.812	0.637881	0.0505278	12.6244	1.54999e-36	4.22472e-35
HELZ	2144.88	0.695988	0.055142	12.6217	1.60242e-36	4.35791e-35
HNRNPH2	469.101	-1.65129	0.13083	-12.6217	1.60365e-36	4.35791e-35
PSMA6	533.075	-0.820639	0.0650273	-12.6199	1.64004e-36	4.45014e-35
DNAJC8	870.385	-1.31639	0.104319	-12.6188	1.66241e-36	4.5041e-35
MRPL44	104.692	-1.43216	0.1135	-12.6182	1.6771e-36	4.53716e-35
CCDC126	406.074	-0.666497	0.0528338	-12.615	1.74583e-36	4.71608e-35
AC083843.3	141.042	1.92136	0.152337	12.6125	1.80126e-36	4.85859e-35
POU2F2	89.7793	-1.43191	0.113541	-12.6115	1.82512e-36	4.91567e-35
NSDHL	66.2516	-1.08854	0.0863146	-12.6113	1.82962e-36	4.92048e-35
MDH2	333.691	-1.55479	0.123295	-12.6103	1.85221e-36	4.97388e-35
CASP3	172.157	-0.729417	0.0578634	-12.6058	1.96073e-36	5.25754e-35
NME9	573.598	1.08184	0.0858729	12.5982	2.1613e-36	5.78682e-35
JARID2	5663.92	0.801698	0.0636495	12.5955	2.2349e-36	5.97507e-35
DNAJC19	510.631	-1.14041	0.0906625	-12.5786	2.76968e-36	7.39394e-35
TCP1	341.122	-1.49446	0.118814	-12.5781	2.78783e-36	7.4315e-35
ZBTB25	334.66	1.02326	0.0813542	12.5778	2.79567e-36	7.44147e-35
VPS72	155.923	-0.852185	0.0677711	-12.5745	2.9178e-36	7.75521e-35
ARFIP2	154.687	-1.0301	0.0819314	-12.5728	2.98124e-36	7.91225e-35
NDUFA6	534.959	-1.90498	0.151552	-12.5698	3.09576e-36	8.20421e-35
AC018521.5	155.178	-1.91537	0.152567	-12.5543	3.76353e-36	9.95938e-35
HSPB1	181.792	-4.52204	0.360355	-12.5489	4.03264e-36	1.0656e-34
TRIP12	1302.56	0.702777	0.0560064	12.5482	4.06852e-36	1.07352e-34
IMP4	134.274	-1.59323	0.126995	-12.5456	4.204e-36	1.10766e-34
ZFP36L2	105.341	-1.93026	0.153881	-12.5439	4.29506e-36	1.13002e-34
RPA2	274.881	-0.981882	0.0782914	-12.5414	4.43178e-36	1.1643e-34
PIGH	449.432	-1.09095	0.0870301	-12.5353	4.78655e-36	1.25569e-34
EZH1	3743.38	0.848484	0.0677112	12.5309	5.05711e-36	1.32476e-34
PNP	75.6134	-1.52458	0.12168	-12.5294	5.15241e-36	1.34778e-34
GRK1	982.112	1.12162	0.0895385	12.5267	5.33344e-36	1.39313e-34
PSMB3	399.691	-1.84075	0.147018	-12.5206	5.75893e-36	1.50211e-34
WDFY3-AS1	83.0241	2.54101	0.202962	12.5196	5.8312e-36	1.51879e-34
NRBF2	112.314	-1.2282	0.0981509	-12.5134	6.30857e-36	1.64077e-34
HIGD1A	363.115	-2.48828	0.198883	-12.5113	6.47342e-36	1.68124e-34
AKT3	4165.98	0.716282	0.0572557	12.5102	6.56359e-36	1.70223e-34
DENND1A	2063.22	0.888934	0.0710649	12.5088	6.68551e-36	1.73137e-34
SERGEF	740.384	0.858116	0.0686212	12.5051	6.99871e-36	1.80991e-34
AL731577.2	456.457	1.15508	0.0923969	12.5013	7.3414e-36	1.89583e-34
RPE	274.133	1.04406	0.0835213	12.5005	7.41579e-36	1.91233e-34
PBX1	1429.36	0.96502	0.0772581	12.4908	8.37564e-36	2.15679e-34
AC004943.2	604.777	0.74735	0.0598668	12.4836	9.17992e-36	2.36055e-34
VPS13A	898.843	1.00594	0.0805876	12.4826	9.29543e-36	2.38688e-34
TPRA1	166.416	-0.868005	0.0695401	-12.4821	9.35065e-36	2.39767e-34
CCT2	417.236	-1.21767	0.0975547	-12.4819	9.37525e-36	2.40059e-34
TMEM170A	375.586	-0.790025	0.06331	-12.4787	9.75819e-36	2.49513e-34
YPEL5	650.629	-1.2983	0.104141	-12.4668	1.13329e-35	2.8937e-34
CRYGS	72.0401	1.42917	0.114661	12.4643	1.16879e-35	2.98018e-34
CDYL	598.514	0.735907	0.0590485	12.4628	1.19159e-35	3.03405e-34
SNAPIN	147.251	-1.54265	0.123838	-12.4571	1.27986e-35	3.25423e-34
TMX1	820.944	-0.754528	0.0605711	-12.4569	1.2825e-35	3.2564e-34
RPUSD2	108.366	-1.237	0.0993383	-12.4524	1.35702e-35	3.44082e-34
EVI5	1758.03	0.730283	0.0586819	12.4448	1.49305e-35	3.78046e-34
AC004253.1	166.971	1.84212	0.148036	12.4437	1.51324e-35	3.82624e-34
DUSP5	90.6459	-1.84986	0.14866	-12.4436	1.51552e-35	3.82668e-34
DDX56	151.251	-0.95284	0.0765863	-12.4414	1.55787e-35	3.92816e-34
AC110716.1	513.044	-1.99447	0.160317	-12.4408	1.56936e-35	3.95165e-34
AC124283.1	43.5342	1.89572	0.15239	12.4399	1.5864e-35	3.98905e-34
HMGB2	925.897	-1.60747	0.129285	-12.4336	1.71823e-35	4.31457e-34
CDKN2B	62.283	-1.6405	0.131946	-12.4331	1.72714e-35	4.33094e-34
HAX1	422.592	-1.19672	0.0962674	-12.4313	1.76841e-35	4.42832e-34
MRPL55	203.766	-2.06733	0.166311	-12.4305	1.78572e-35	4.4621e-34
CCSER1	18530	0.877599	0.0706009	12.4304	1.7868e-35	4.4621e-34
MLLT10	2744.51	0.61084	0.0491701	12.423	1.96086e-35	4.89004e-34
NIPBL	3376.01	0.653958	0.0526429	12.4225	1.97233e-35	4.91191e-34
ECH1	149.084	-1.10918	0.0892985	-12.4211	2.0086e-35	4.99539e-34
PMVK	276.135	-1.68217	0.135455	-12.4187	2.06876e-35	5.13798e-34
TMEM59	1088.16	-1.33397	0.107432	-12.4169	2.11584e-35	5.24774e-34
YTHDC2	2008.36	0.615767	0.0496025	12.414	2.19342e-35	5.43275e-34
PIM2	22.6064	-1.59696	0.128842	-12.3947	2.79078e-35	6.90291e-34
CDC42BPA	2521.19	0.676587	0.0546113	12.3891	2.99288e-35	7.39275e-34
CETN3	302.961	-1.26789	0.102377	-12.3846	3.16769e-35	7.81392e-34
SRBD1	741.77	0.778878	0.0629172	12.3794	3.37852e-35	8.32271e-34
PCIF1	135.923	-0.979948	0.0791906	-12.3745	3.58902e-35	8.82929e-34
PIK3C3	711.731	0.736152	0.0595009	12.3721	3.69915e-35	9.08792e-34
PAXBP1	1090.23	0.937774	0.0758103	12.37	3.79848e-35	9.31936e-34
AGO1	343.499	0.732423	0.0592241	12.367	3.94439e-35	9.66429e-34
MAP4K3	3641.63	0.720464	0.0582619	12.366	3.99373e-35	9.772e-34
PDRG1	114.56	-1.4139	0.114397	-12.3596	4.32186e-35	1.05607e-33
EIF4E	975.908	-0.671201	0.0543129	-12.358	4.40834e-35	1.07575e-33
CMTM6	202.125	-0.943004	0.0763269	-12.3548	4.58879e-35	1.11829e-33
OCIAD1-AS1	87.4172	1.72538	0.13967	12.3532	4.67942e-35	1.13885e-33
ARF1	634.656	-1.15031	0.093123	-12.3525	4.71962e-35	1.14709e-33
FOS	1195.34	-4.4879	0.363475	-12.3472	5.04406e-35	1.22431e-33
PSMD9	381.015	-0.737318	0.059745	-12.3411	5.44275e-35	1.31932e-33
ELP1	645.042	0.596567	0.0483485	12.3389	5.59309e-35	1.35396e-33
ADPRHL2	148.831	-1.01506	0.0822826	-12.3363	5.77418e-35	1.39594e-33
ASTN1	1814.79	0.953455	0.077297	12.3349	5.87255e-35	1.41783e-33
INTS2	420.468	0.692089	0.0561217	12.332	6.09535e-35	1.46968e-33
ZMYM2	3057.07	0.553792	0.0449103	12.3311	6.16276e-35	1.48396e-33
WBP11	648.109	-0.696569	0.0564993	-12.3288	6.33729e-35	1.52397e-33
CHD6	1920.5	0.594646	0.0482553	12.3229	6.81791e-35	1.63738e-33
SNRPB	256.895	-1.44135	0.117005	-12.3187	7.18345e-35	1.72289e-33
RPN1	284.164	-1.04517	0.0848817	-12.3132	7.68839e-35	1.84157e-33
SNX13	1066.53	0.815697	0.0662628	12.31	7.99906e-35	1.91346e-33
C6orf47	58.7491	-1.42294	0.115609	-12.3082	8.18059e-35	1.95431e-33
DNAJB9	221.35	-1.88935	0.153516	-12.3071	8.29013e-35	1.97788e-33
ZNF622	131.994	-1.58657	0.128923	-12.3063	8.37694e-35	1.99597e-33
ADIPOR1	551.184	-1.57495	0.127983	-12.306	8.41222e-35	2.00176e-33
BRMS1L	268.013	-0.812542	0.0660578	-12.3005	9.00466e-35	2.13993e-33
ATG101	89.2758	-1.81039	0.147202	-12.2986	9.21236e-35	2.18643e-33
AL354733.2	81.5035	1.25239	0.101859	12.2954	9.58733e-35	2.27246e-33
S100PBP	581.736	0.812416	0.0661043	12.2899	1.0263e-34	2.42943e-33
CES2	176.631	-0.886055	0.072097	-12.2898	1.02815e-34	2.43065e-33
RNF11	837.552	-0.703218	0.0572292	-12.2878	1.05391e-34	2.48833e-33
WDR11	931.721	0.648701	0.0528333	12.2783	1.18509e-34	2.79442e-33
WDFY3	2836.92	0.855491	0.0696962	12.2746	1.24035e-34	2.92093e-33
ZNF428	499.964	-1.24483	0.101425	-12.2735	1.25721e-34	2.95681e-33
ZCCHC9	225.28	-0.968461	0.0789197	-12.2715	1.28898e-34	3.0276e-33
POLE3	121.178	-1.32505	0.107998	-12.2692	1.32537e-34	3.10906e-33
SS18	632.093	0.582052	0.0474405	12.2691	1.32722e-34	3.10938e-33
TINF2	102.5	-1.40722	0.114751	-12.2633	1.42519e-34	3.33462e-33
CHD7	3586.55	0.620365	0.0506035	12.2593	1.49731e-34	3.49886e-33
ZNF248	1290.84	0.871144	0.0710656	12.2583	1.51638e-34	3.53887e-33
HSPD1	1004.71	-1.8426	0.150347	-12.2556	1.56806e-34	3.65478e-33
EIF4G3	3943.95	0.677748	0.0553049	12.2547	1.58444e-34	3.68823e-33
RAD23A	475.855	-1.11258	0.0908055	-12.2523	1.63232e-34	3.79482e-33
KIAA1328	1444.46	0.765045	0.0624594	12.2487	1.70767e-34	3.96495e-33
ATG3	260.649	-0.817804	0.0667765	-12.2469	1.74584e-34	4.04838e-33
MEST	433.376	-0.860416	0.0702569	-12.2467	1.74961e-34	4.05197e-33
AC091133.1	69.3845	1.61439	0.131951	12.2347	2.02761e-34	4.68981e-33
HACE1	1693.54	0.791499	0.0647299	12.2277	2.2104e-34	5.10611e-33
NECAP1	573.552	-0.681541	0.0557413	-12.2269	2.23407e-34	5.15425e-33
KIAA0895L	687.196	1.11996	0.0916644	12.2181	2.48896e-34	5.73501e-33
GAS5	371.789	-1.84636	0.151134	-12.2167	2.53173e-34	5.82618e-33
CAMLG	536.662	-1.40456	0.114999	-12.2136	2.62829e-34	6.04074e-33
DYNLL1	1345.38	-1.63783	0.134111	-12.2125	2.66611e-34	6.11992e-33
SNHG7	269.161	-1.39348	0.114108	-12.212	2.68333e-34	6.15169e-33
C5orf15	379.551	-0.731708	0.059926	-12.2102	2.74244e-34	6.27929e-33
CASD1	984.148	0.598304	0.0490024	12.2097	2.75968e-34	6.31082e-33
BRD2	371.341	-1.06211	0.0870138	-12.2063	2.87763e-34	6.57227e-33
KIAA1143	177.997	-1.1393	0.0933424	-12.2056	2.90146e-34	6.61838e-33
TSR2	368.429	-1.69004	0.138473	-12.2048	2.92991e-34	6.67491e-33
MRM2	128.289	-1.05741	0.0866428	-12.2043	2.94971e-34	6.71058e-33
RNF6	340.434	-1.54281	0.126417	-12.2042	2.95295e-34	6.71058e-33
PICALM	1603.97	0.650869	0.0533442	12.2013	3.05827e-34	6.94123e-33
CIART	60.0887	-1.85674	0.152268	-12.1938	3.35241e-34	7.59936e-33
FBXO3	367.607	-0.518581	0.0425319	-12.1928	3.39753e-34	7.69205e-33
YIPF3	366.221	-1.4727	0.120796	-12.1916	3.44542e-34	7.79076e-33
CCM2	419.61	0.798374	0.0655249	12.1843	3.76935e-34	8.51263e-33
TM2D1	655.84	-0.68762	0.0564486	-12.1814	3.90725e-34	8.81312e-33
DEGS1	184.366	-1.06362	0.0873478	-12.1769	4.12882e-34	9.30136e-33
LINC01355	173.725	1.29961	0.106771	12.1718	4.39076e-34	9.87922e-33
INTU	2506.62	0.92506	0.0760122	12.1699	4.49669e-34	1.0105e-32
XRN1	2479.37	0.595939	0.0489929	12.1638	4.8472e-34	1.08793e-32
PSMC1	431.178	-1.00724	0.0828122	-12.163	4.89445e-34	1.09718e-32
TOMM70	756.622	-0.583016	0.0479623	-12.1557	5.34937e-34	1.19768e-32
PDIA6	404.88	-0.958651	0.0788945	-12.151	5.66394e-34	1.26655e-32
EIF2S2	696.899	-1.01301	0.0833743	-12.1501	5.72655e-34	1.27898e-32
BRSK2	240.745	1.09803	0.0904315	12.1421	6.31805e-34	1.40935e-32
RPS27L	378.66	-1.13435	0.0934387	-12.14	6.48111e-34	1.44395e-32
OTUD6B-AS1	711.161	-1.6187	0.133378	-12.1362	6.79446e-34	1.51006e-32
PLEKHB1	3664.23	-1.18227	0.097417	-12.1362	6.79081e-34	1.51006e-32
KIF1BP	345.273	-0.851366	0.0701546	-12.1356	6.844e-34	1.51922e-32
FBXW4	604.634	0.756409	0.062344	12.1328	7.07516e-34	1.56861e-32
USP40	736.948	0.753124	0.0620972	12.1281	7.49369e-34	1.65938e-32
RIC8A	154.399	-1.12603	0.0928583	-12.1263	7.65894e-34	1.69391e-32
ABCB10	242.612	0.802031	0.0661573	12.1231	7.96914e-34	1.75824e-32
TIMM8A	37.9483	-1.3528	0.111587	-12.1232	7.95961e-34	1.75824e-32
CHIC1	465.089	0.803952	0.0663298	12.1205	8.22361e-34	1.81218e-32
SPACA9	126.575	-1.10996	0.0915862	-12.1193	8.34426e-34	1.83655e-32
TAF7	631.056	-1.66664	0.137529	-12.1185	8.42792e-34	1.85272e-32
OTUB1	203.485	-0.805932	0.0665123	-12.117	8.57935e-34	1.88373e-32
TIMM8B	331.338	-1.47154	0.121472	-12.1142	8.88085e-34	1.94757e-32
AC087741.1	55.3655	1.78109	0.147045	12.1125	9.06846e-34	1.98632e-32
TBC1D24	283.827	0.903237	0.0746	12.1077	9.61202e-34	2.10285e-32
POGZ	1685.74	0.574445	0.0474468	12.1071	9.68276e-34	2.11578e-32
FAM32A	129.002	-1.61034	0.133023	-12.1057	9.84954e-34	2.14964e-32
AC108449.1	262.304	1.98413	0.163945	12.1025	1.0249e-33	2.23413e-32
AC138627.1	432.735	1.20258	0.0993721	12.1018	1.03366e-33	2.25054e-32
YIF1B	130.384	-1.14242	0.0944054	-12.1012	1.04109e-33	2.264e-32
HCCS	50.3217	-1.70424	0.140851	-12.0995	1.06194e-33	2.30658e-32
FAIM	2301.47	-1.59085	0.131499	-12.0978	1.0844e-33	2.35256e-32
RFC5	112.876	-0.619994	0.0512535	-12.0966	1.10037e-33	2.38243e-32
AIPL1	18052.9	-1.03789	0.0858005	-12.0966	1.10079e-33	2.38243e-32
CLDN3	62.7238	-2.20022	0.181943	-12.0929	1.15195e-33	2.49019e-32
BAG1	504.571	-1.85705	0.153568	-12.0927	1.15455e-33	2.49123e-32
AC012146.1	33.0688	-1.66412	0.137614	-12.0926	1.15518e-33	2.49123e-32
ALAS1	93.1638	-1.2995	0.107474	-12.0913	1.17475e-33	2.53044e-32
GIGYF2	1761.61	0.532677	0.044138	12.0685	1.5502e-33	3.33523e-32
FAM122A	110.182	-1.67085	0.13846	-12.0674	1.57016e-33	3.37417e-32
LINC01550	6.67917	-2.68948	0.222893	-12.0662	1.59293e-33	3.41907e-32
GBP4	7.85604	-2.44075	0.202337	-12.0628	1.66055e-33	3.56e-32
MAPKAPK5-AS1	296.154	-1.08643	0.0900821	-12.0605	1.70796e-33	3.65732e-32
AC040934.1	105.726	1.39439	0.115622	12.06	1.71886e-33	3.67634e-32
MLLT1	177.662	0.890059	0.073804	12.0598	1.72279e-33	3.68042e-32
AKT2	707.011	0.912925	0.0757024	12.0594	1.73044e-33	3.69242e-32
ZNF516	1885.6	0.97627	0.0809779	12.056	1.80318e-33	3.84311e-32
CDKL1	291.529	1.10437	0.0916296	12.0525	1.88113e-33	4.00456e-32
NOP58	1079.5	-0.943203	0.0782598	-12.0522	1.88837e-33	4.01528e-32
COX19	210.704	-0.671876	0.0557558	-12.0503	1.93156e-33	4.10231e-32
TOR3A	95.9467	-0.78842	0.065482	-12.0403	2.18268e-33	4.63024e-32
MPDU1	162.581	-1.10422	0.091719	-12.0392	2.21119e-33	4.68524e-32
UBR7	415.617	-0.610876	0.0507428	-12.0387	2.22478e-33	4.70855e-32
SHPRH	2120.75	0.69844	0.058031	12.0356	2.30839e-33	4.87984e-32
EMC8	208.031	-0.703455	0.0584487	-12.0354	2.31456e-33	4.88719e-32
ATXN1	11794.3	0.730564	0.060716	12.0325	2.3988e-33	5.05918e-32
SNRPF	337.164	-1.49341	0.12412	-12.032	2.41159e-33	5.08026e-32
RAD51B	3569.33	0.807468	0.0671152	12.0311	2.43985e-33	5.13385e-32
MRPS11	247.355	-0.74753	0.0621913	-12.0198	2.79497e-33	5.87427e-32
DZIP1L	462.334	1.06014	0.0882001	12.0197	2.80058e-33	5.87928e-32
SUPT4H1	135.526	-1.72659	0.143661	-12.0185	2.84118e-33	5.95762e-32
TEAD1	1621.73	0.873774	0.0727052	12.018	2.85659e-33	5.98304e-32
ALG3	82.1942	-1.34997	0.112331	-12.0177	2.86757e-33	5.99914e-32
SRA1	339.558	-0.812224	0.0675877	-12.0173	2.88103e-33	6.01496e-32
DCDC1	1907.97	0.924977	0.0769703	12.0173	2.88176e-33	6.01496e-32
RBM3	501.26	-1.59131	0.132428	-12.0164	2.91317e-33	6.07356e-32
AHCY	136.345	-1.26612	0.105445	-12.0074	3.24759e-33	6.76302e-32
DCAF13	175.096	-1.08497	0.0903629	-12.0068	3.27439e-33	6.81103e-32
LINC00630	261.784	0.977719	0.0814568	12.0029	3.43012e-33	7.1268e-32
CLASP1	8460.33	0.839886	0.0700006	11.9983	3.62761e-33	7.52853e-32
DNAJB4	249.801	-1.63544	0.136342	-11.9951	3.76868e-33	7.81238e-32
BX537318.1	44.4628	-1.43342	0.119568	-11.9883	4.09143e-33	8.47177e-32
AC096733.2	25.0181	-1.74895	0.145918	-11.9858	4.21747e-33	8.72282e-32
PTMA	5105.88	-2.46583	0.205765	-11.9837	4.32396e-33	8.93291e-32
AC239799.2	20.1713	-3.83695	0.320269	-11.9804	4.50091e-33	9.28792e-32
RINL	76.2941	-1.15942	0.0967872	-11.9791	4.57469e-33	9.42946e-32
LIG3	155.075	0.791808	0.0661026	11.9785	4.60679e-33	9.48488e-32
FAM172A	2604.41	0.657044	0.0548686	11.9749	4.81298e-33	9.89818e-32
CCT3	1472.61	-1.02311	0.0854389	-11.9747	4.82087e-33	9.90026e-32
TLNRD1	43.7037	-1.42292	0.118828	-11.9746	4.82488e-33	9.90026e-32
ATAD2B	1711.77	0.729993	0.0609688	11.9732	4.90841e-33	1.00603e-31
OTUD3	234.672	0.800783	0.0668901	11.9716	5.00471e-33	1.02461e-31
MYO7A	525.938	1.03507	0.0864682	11.9705	5.07221e-33	1.03726e-31
DLEU2	4161.48	0.723857	0.0604815	11.9682	5.21234e-33	1.06472e-31
NOP56	203.317	-1.25707	0.105058	-11.9655	5.38854e-33	1.09948e-31
FAM110A	26.6683	-2.2147	0.185135	-11.9626	5.57611e-33	1.13648e-31
MORF4L1	1254.16	-1.04478	0.087339	-11.9624	5.59431e-33	1.13891e-31
POMP	733.179	-1.78473	0.149216	-11.9607	5.70477e-33	1.1601e-31
AL109947.1	29.7907	-1.67628	0.140166	-11.9592	5.80959e-33	1.18009e-31
ZNF526	60.1703	-1.03186	0.0862823	-11.9591	5.82037e-33	1.18096e-31
NAA20	377.683	-1.07062	0.0895292	-11.9583	5.87467e-33	1.19065e-31
ZGRF1	588.336	0.741435	0.0620313	11.9526	6.29282e-33	1.27398e-31
PERP	290.544	-1.41413	0.118323	-11.9514	6.38459e-33	1.29112e-31
NTMT1	108.132	-1.38179	0.115619	-11.9513	6.39309e-33	1.2914e-31
NOP16	23.1796	-1.79491	0.150237	-11.9472	6.71402e-33	1.35473e-31
C6orf136	265.006	-0.784307	0.0656591	-11.9451	6.88328e-33	1.38734e-31
SYT14	1867.67	0.645951	0.0540868	11.9429	7.07384e-33	1.42417e-31
SIVA1	233.092	-1.15881	0.0970303	-11.9428	7.08258e-33	1.42435e-31
RBMX2	111.799	-1.29681	0.108594	-11.9418	7.16678e-33	1.43969e-31
URM1	177.521	-0.883239	0.0739708	-11.9404	7.28871e-33	1.46257e-31
WDR74	84.3109	-1.54282	0.129218	-11.9397	7.35313e-33	1.47387e-31
SNRNP27	295.373	-1.33897	0.112162	-11.9378	7.51439e-33	1.50453e-31
AC023157.3	134.912	-1.37069	0.114821	-11.9376	7.53354e-33	1.50671e-31
FRG1	388.163	-1.0885	0.0912025	-11.9349	7.78178e-33	1.55465e-31
DDX49	191.528	-0.858684	0.0719493	-11.9346	7.81568e-33	1.5597e-31
SEC24B	1941.64	0.72134	0.0604441	11.934	7.86925e-33	1.56867e-31
IQCG	724.613	-0.605437	0.050734	-11.9335	7.91258e-33	1.57558e-31
LINC00894	665.451	1.19631	0.10025	11.9332	7.94835e-33	1.58097e-31
ZBTB37	532.198	0.985959	0.0826993	11.9222	9.06628e-33	1.80137e-31
FKBPL	30.3668	-2.00645	0.168451	-11.9112	1.03529e-32	2.05476e-31
HSPA5	478.499	-1.99137	0.167188	-11.911	1.03751e-32	2.05692e-31
COPZ1	462.81	-1.28543	0.107932	-11.9096	1.05441e-32	2.08814e-31
RAB11FIP2	457.936	0.895844	0.0752222	11.9093	1.05853e-32	2.09403e-31
ZNF451	1128.16	0.635419	0.0533753	11.9047	1.1182e-32	2.20966e-31
C5orf49	28.8357	-1.68841	0.141873	-11.9008	1.17156e-32	2.31258e-31
TRIM23	398.588	0.686884	0.0577321	11.8978	1.21528e-32	2.39629e-31
WDR61	627.548	-1.17849	0.0990619	-11.8965	1.23342e-32	2.42942e-31
PTK2	4697.02	0.677286	0.0569341	11.896	1.24192e-32	2.44352e-31
BTF3L4	461.25	-0.658299	0.0553429	-11.8949	1.25802e-32	2.47253e-31
LCOR	2776.23	0.557705	0.0468981	11.8918	1.30506e-32	2.5622e-31
AC064852.1	50.4245	1.60216	0.134734	11.8912	1.31442e-32	2.57779e-31
ETV3	75.8578	-1.11624	0.0939566	-11.8803	1.49772e-32	2.93412e-31
RPS8	2374.84	-2.68739	0.226277	-11.8766	1.56694e-32	3.06641e-31
PARD3	4769.07	0.915015	0.0770513	11.8754	1.58863e-32	3.10551e-31
FBXO5	31.4641	-1.45391	0.122439	-11.8746	1.60446e-32	3.1331e-31
PIPOX	133.344	-2.30162	0.193847	-11.8734	1.62706e-32	3.17382e-31
LOH12CR2	41.8668	-1.80712	0.152275	-11.8675	1.74605e-32	3.40227e-31
FAM120B	1013.36	0.717487	0.0604759	11.864	1.82041e-32	3.54337e-31
PFDN4	209.879	-1.44659	0.121932	-11.8639	1.82244e-32	3.54353e-31
OGT	645.682	1.10979	0.0935513	11.8629	1.84454e-32	3.58266e-31
CDCA2	31.8318	-1.95104	0.164469	-11.8627	1.84923e-32	3.58795e-31
TOB1	527.696	-1.38609	0.116847	-11.8625	1.8542e-32	3.59374e-31
SCCPDH	412.793	-0.804371	0.0678699	-11.8517	2.10983e-32	4.08484e-31
CSNK2B	280.244	-1.75953	0.148471	-11.851	2.12624e-32	4.11223e-31
TMA7	1929.17	-1.8961	0.160036	-11.848	2.20463e-32	4.25932e-31
TMEM60	97.6619	-1.80753	0.152628	-11.8427	2.34672e-32	4.52901e-31
CSNK2A2	241.841	0.657794	0.0555488	11.8417	2.37542e-32	4.57954e-31
MYDGF	241.023	-1.25608	0.106078	-11.8411	2.39363e-32	4.60977e-31
CDC73	1830.11	0.812853	0.0686515	11.8403	2.41608e-32	4.64808e-31
FUZ	79.0564	-1.14735	0.0969145	-11.8388	2.46072e-32	4.72895e-31
MRPL21	262.668	-1.57962	0.133468	-11.8351	2.56956e-32	4.93291e-31
KCTD3	819.33	0.661463	0.055898	11.8334	2.62328e-32	5.03072e-31
SEC61B	503.516	-1.28505	0.1086	-11.8328	2.64114e-32	5.05964e-31
RIOX1	15.7384	-1.44557	0.122178	-11.8317	2.67568e-32	5.1204e-31
FADD	36.6119	-1.62433	0.137301	-11.8304	2.71823e-32	5.19637e-31
AMY2B	672.785	0.875856	0.0740405	11.8294	2.75049e-32	5.2525e-31
ERP29	738.959	-1.11001	0.0938542	-11.827	2.83186e-32	5.40222e-31
CHCHD5	168.076	-1.50632	0.127373	-11.8261	2.86242e-32	5.4548e-31
AC022217.3	158.122	-3.13281	0.264943	-11.8245	2.91717e-32	5.55332e-31
EIF3E	965.561	-1.61183	0.136341	-11.822	3.0039e-32	5.71244e-31
UCP2	41.1071	-1.89502	0.160303	-11.8215	3.02264e-32	5.74207e-31
RPS6	3637.83	-2.80223	0.237052	-11.8212	3.03376e-32	5.75717e-31
PSMB2	463.273	-0.823459	0.0696918	-11.8157	3.23773e-32	6.13784e-31
TRIR	485.108	-1.47754	0.125074	-11.8133	3.33033e-32	6.30681e-31
SNAP91	4754.1	0.670687	0.0567795	11.8121	3.37813e-32	6.39068e-31
C10orf95	139.074	-1.47048	0.124504	-11.8106	3.43942e-32	6.49985e-31
AKNA	2162.93	0.811772	0.0687525	11.8072	3.58477e-32	6.76751e-31
POLR2G	224.837	-2.03516	0.172383	-11.806	3.63387e-32	6.85309e-31
TAF4	415.941	0.997333	0.0844923	11.8038	3.7289e-32	7.02502e-31
MAPKAP1	1406.85	0.554087	0.0469482	11.8021	3.80694e-32	7.16461e-31
MRPS12	110.17	-1.65194	0.140003	-11.7993	3.93741e-32	7.4025e-31
SHARPIN	281.474	-0.845943	0.071698	-11.7987	3.96426e-32	7.44528e-31
RNF113A	146.049	-1.77911	0.150819	-11.7963	4.07659e-32	7.64833e-31
GOLGA7	231.122	-1.39409	0.118186	-11.7958	4.10355e-32	7.69098e-31
NOLC1	215.515	-0.967607	0.0820396	-11.7944	4.1722e-32	7.81159e-31
AC009716.1	214.139	2.43492	0.20645	11.7942	4.18095e-32	7.81992e-31
NUBP2	204.132	-1.14167	0.096821	-11.7915	4.31702e-32	8.06612e-31
BOLA3	291.552	-1.64056	0.139138	-11.7908	4.35146e-32	8.12212e-31
SPECC1	1072.78	0.851541	0.0722354	11.7884	4.47884e-32	8.35131e-31
SLC25A38	131.171	-0.865802	0.0734674	-11.7849	4.67231e-32	8.70314e-31
PWP1	375.094	-0.685297	0.0581602	-11.7829	4.78124e-32	8.89692e-31
SUB1	677.256	-1.34245	0.113958	-11.7802	4.93763e-32	9.17853e-31
SARS	504.725	-0.870136	0.0739004	-11.7744	5.28619e-32	9.81644e-31
NAA30	279.644	-0.646514	0.0549088	-11.7743	5.29353e-32	9.82004e-31
POLA1	1381.82	0.881026	0.0748269	11.7742	5.30204e-32	9.82581e-31
FAM71E1	55.8911	-2.06106	0.175061	-11.7734	5.35467e-32	9.91324e-31
PPID	315.046	-1.11753	0.0949403	-11.7708	5.5166e-32	1.02026e-30
CAMTA1	4988.9	0.514128	0.0436879	11.7682	5.69269e-32	1.05176e-30
C8orf33	251.398	-1.16563	0.0990608	-11.7669	5.78346e-32	1.06744e-30
ESS2	64.8242	-0.841682	0.0715414	-11.765	5.91572e-32	1.09075e-30
ERRFI1	184.198	-0.969331	0.0823929	-11.7647	5.9311e-32	1.09248e-30
RNF5	159.666	-1.94948	0.16572	-11.7637	6.00391e-32	1.10477e-30
REL	389.349	-0.814161	0.069219	-11.7621	6.11817e-32	1.12465e-30
UNC119	10080.5	-1.36646	0.116293	-11.7502	7.04711e-32	1.29411e-30
SMARCA2	1752.25	0.604914	0.0515095	11.7437	7.60407e-32	1.39498e-30
IER3IP1	436.506	-1.35041	0.11499	-11.7437	7.6122e-32	1.39506e-30
SV2B	6199.18	0.634424	0.0540403	11.7398	7.96558e-32	1.45835e-30
NEO1	1695.42	0.654642	0.0557714	11.7379	8.14389e-32	1.4895e-30
USE1	163.562	-1.19579	0.101893	-11.7357	8.3614e-32	1.52774e-30
RFX7	1531.55	0.537339	0.0458396	11.7222	9.81467e-32	1.79147e-30
SLC40A1	514.415	-1.19223	0.101715	-11.7213	9.91973e-32	1.80883e-30
AP005131.5	174.027	2.06217	0.176086	11.7111	1.11766e-31	2.03598e-30
GORASP2	685.324	-0.629696	0.0537869	-11.7072	1.17019e-31	2.12953e-30
STRN	936.859	0.532107	0.0454536	11.7066	1.17926e-31	2.1439e-30
PEX1	663.241	0.873943	0.0746568	11.7061	1.18548e-31	2.15306e-30
CCDC71	39.489	-1.43036	0.122208	-11.7044	1.21051e-31	2.19631e-30
EIF6	157.311	-1.5887	0.135746	-11.7035	1.22298e-31	2.21673e-30
LMLN	420.856	0.651441	0.0556864	11.6984	1.29893e-31	2.35204e-30
LINC01933	102.356	1.28609	0.109939	11.6982	1.30212e-31	2.35443e-30
CLDN20	142.23	1.63189	0.1395	11.6981	1.30284e-31	2.35443e-30
MRPL58	138.577	-1.06966	0.091498	-11.6905	1.42484e-31	2.57234e-30
ZRANB1	367.595	0.763566	0.0653184	11.6899	1.4355e-31	2.58902e-30
DCAF6	892.104	0.518062	0.04432	11.6891	1.44873e-31	2.6103e-30
TCEAL1	88.0096	-1.41604	0.121175	-11.6859	1.50491e-31	2.70884e-30
PSMF1	473.188	-0.605609	0.0518252	-11.6856	1.5099e-31	2.71513e-30
FER	2356.89	0.920415	0.0787727	11.6844	1.53077e-31	2.74993e-30
ELOVL4	4102.1	-1.07184	0.0917433	-11.683	1.55719e-31	2.79463e-30
PSENEN	165.861	-2.11351	0.18092	-11.682	1.57527e-31	2.8243e-30
KIF21A	2903.69	0.646642	0.055369	11.6788	1.63669e-31	2.93152e-30
SEC62	3843.84	-1.2574	0.107673	-11.678	1.6511e-31	2.95443e-30
JUNB	804.613	-2.9401	0.251791	-11.6767	1.67656e-31	2.99704e-30
ZNF382	225.434	0.719729	0.0616479	11.6748	1.71387e-31	3.06072e-30
ZMYND10	82.6986	-1.17038	0.100259	-11.6735	1.7406e-31	3.10542e-30
MYCBP2	1416.94	0.704618	0.0603783	11.6701	1.81279e-31	3.23102e-30
RICTOR	4733.24	0.738744	0.0633097	11.6687	1.84159e-31	3.27914e-30
UFC1	329.62	-1.69575	0.145342	-11.6674	1.87094e-31	3.32815e-30
CYB5B	397.718	-0.485358	0.0416011	-11.667	1.88035e-31	3.34162e-30
FCF1	239.721	-0.813578	0.0697486	-11.6644	1.93654e-31	3.43812e-30
TOR2A	70.5538	-1.34604	0.115411	-11.663	1.96993e-31	3.49398e-30
MAP3K12	469.179	1.00811	0.0864437	11.6621	1.99098e-31	3.52787e-30
SUPT20H	594.123	0.564378	0.0483948	11.662	1.99399e-31	3.52977e-30
ARG2	503.828	-0.872972	0.0748586	-11.6616	2.00224e-31	3.54093e-30
CD164	403.965	-0.709141	0.0608386	-11.6561	2.13591e-31	3.77364e-30
RHEBL1	16.4	-2.35908	0.202474	-11.6513	2.26096e-31	3.99071e-30
ARPC1A	400.959	-0.751068	0.0644677	-11.6503	2.28648e-31	4.03184e-30
MRPS18A	131.05	-1.14113	0.0979656	-11.6483	2.34056e-31	4.12319e-30
ZDHHC3	169.181	-0.659349	0.0566095	-11.6473	2.3677e-31	4.16697e-30
CCDC134	282.327	-1.13066	0.0970835	-11.6462	2.39886e-31	4.21773e-30
C17orf58	95.1849	-1.668	0.143236	-11.6451	2.43096e-31	4.27003e-30
CWC15	374.833	-1.34388	0.115407	-11.6448	2.44009e-31	4.28193e-30
WWP1	2019.46	0.587113	0.0504306	11.642	2.52062e-31	4.41899e-30
ABHD11	73.8887	-1.17875	0.101262	-11.6406	2.56221e-31	4.48757e-30
C12orf57	478.917	-1.83717	0.157828	-11.6403	2.57116e-31	4.49892e-30
TRAM1	392.179	-1.10489	0.0949353	-11.6383	2.63181e-31	4.6006e-30
N4BP2L2-IT2	59.6679	1.68471	0.144806	11.6343	2.75888e-31	4.81811e-30
ESD	924.944	-1.16531	0.10017	-11.6333	2.78936e-31	4.86666e-30
UXT	244.837	-1.44572	0.12429	-11.6319	2.83736e-31	4.94566e-30
FAM160B2	178.707	1.02381	0.0880399	11.6289	2.93891e-31	5.11776e-30
MRPS23	383.307	-1.24816	0.107343	-11.6277	2.97845e-31	5.18165e-30
MON2	2696.8	0.631575	0.0543289	11.625	3.07543e-31	5.34525e-30
MRPL15	432.572	-1.00378	0.0863638	-11.6227	3.15814e-31	5.48377e-30
LIN7B	242.098	-1.08154	0.0930598	-11.622	3.18496e-31	5.52506e-30
API5	466.461	-0.464138	0.0399365	-11.6219	3.19036e-31	5.52915e-30
IQCD	103.845	-0.722994	0.062211	-11.6217	3.19888e-31	5.53863e-30
RPL28	2658.87	-2.12779	0.183182	-11.6157	3.42932e-31	5.93197e-30
PPP2R5C	1299.06	0.579637	0.0499021	11.6155	3.43897e-31	5.94302e-30
MRPL54	477.161	-1.65144	0.1422	-11.6135	3.51894e-31	6.07544e-30
MEA1	149.906	-2.26364	0.19492	-11.6132	3.53056e-31	6.08972e-30
MOCS3	32.1093	-1.55605	0.134093	-11.6043	3.9196e-31	6.75434e-30
ZFP2	203.372	0.824828	0.0710986	11.6012	4.06407e-31	6.99666e-30
MRPL9	134.024	-1.28649	0.11091	-11.5994	4.15023e-31	7.13824e-30
GDI2	601.626	-0.504769	0.0435177	-11.5992	4.16111e-31	7.15018e-30
CISD2	534.785	-1.131	0.0975219	-11.5974	4.24714e-31	7.29112e-30
CHP1	313.747	-0.704462	0.0607489	-11.5963	4.30362e-31	7.38112e-30
PCDH15	31514.4	0.725235	0.0625629	11.5921	4.51926e-31	7.74365e-30
ULK2	581.618	0.630854	0.0544304	11.5901	4.62577e-31	7.9187e-30
ZNF689	32.1234	-1.29439	0.111695	-11.5887	4.70414e-31	8.04527e-30
COL28A1	500.078	1.19858	0.103457	11.5853	4.89319e-31	8.36074e-30
POLR1E	50.9667	-1.27116	0.109722	-11.5852	4.89843e-31	8.36183e-30
MED18	35.2517	-1.31957	0.113914	-11.5839	4.97182e-31	8.47914e-30
TMED2	441.698	-1.75303	0.151391	-11.5795	5.23304e-31	8.91628e-30
SLC25A25-AS1	144.993	1.20443	0.104019	11.5789	5.26914e-31	8.96937e-30
SLC25A19	40.0717	-1.47227	0.12719	-11.5754	5.49381e-31	9.34308e-30
ZNF529-AS1	300.124	0.823611	0.0711528	11.5752	5.50161e-31	9.3476e-30
RTBDN	3447.68	-2.22148	0.191957	-11.5728	5.66316e-31	9.6131e-30
ANKIB1	1384.05	0.585198	0.0505691	11.5722	5.69765e-31	9.66262e-30
ABCA10	500.914	1.27387	0.110081	11.5721	5.70362e-31	9.66373e-30
AC040169.1	46.394	-1.40239	0.121196	-11.5713	5.75923e-31	9.74886e-30
TRMT112	507.419	-2.2843	0.1975	-11.5661	6.12169e-31	1.03528e-29
GOLGA8A	1170.87	1.81132	0.156608	11.566	6.12958e-31	1.03565e-29
UQCRH	2043.8	-1.83618	0.158793	-11.5633	6.32155e-31	1.06709e-29
PPFIA1	1327.13	0.571771	0.0494753	11.5567	6.82965e-31	1.15179e-29
PHYH	208.315	-1.0515	0.091023	-11.552	7.21431e-31	1.21553e-29
PDCL	332.885	-1.03782	0.0898735	-11.5476	7.59528e-31	1.27854e-29
C18orf21	102.896	-1.22252	0.105877	-11.5466	7.67618e-31	1.29096e-29
IK	622.459	-1.43449	0.124254	-11.5448	7.84222e-31	1.31767e-29
ARHGEF12	2325.36	0.709325	0.0615154	11.5309	9.22139e-31	1.54797e-29
PFDN2	422.938	-1.55572	0.134927	-11.5301	9.30674e-31	1.56085e-29
PPP1R9A	5576.45	0.703718	0.0610384	11.5291	9.41268e-31	1.57717e-29
AC005306.1	47.4894	1.80928	0.156966	11.5266	9.68717e-31	1.62166e-29
UBB	1971.82	-2.56478	0.222513	-11.5265	9.70578e-31	1.62328e-29
RAB3GAP2	1180.46	0.581384	0.0504452	11.5251	9.86492e-31	1.64838e-29
OST4	454.627	-2.23073	0.193581	-11.5235	1.00437e-30	1.67672e-29
SLC25A5-AS1	46.7	-1.26869	0.110135	-11.5194	1.053e-30	1.7563e-29
TXNDC12	227.295	-0.721618	0.0626729	-11.514	1.12105e-30	1.86807e-29
RAB7A	1103.79	-0.476173	0.0413571	-11.5137	1.1256e-30	1.87393e-29
NAXE	85.117	-1.80079	0.156414	-11.513	1.13424e-30	1.8866e-29
AC013733.1	55.0354	2.90459	0.252366	11.5095	1.1822e-30	1.96457e-29
ZDHHC17	1001.12	0.48447	0.0420946	11.5091	1.18762e-30	1.97177e-29
PDZD11	131.774	-1.73506	0.150821	-11.5041	1.25771e-30	2.08624e-29
EXOC6B	2825.76	0.728114	0.0633027	11.5021	1.28735e-30	2.13346e-29
SNHG8	432.373	-1.78178	0.154977	-11.4971	1.36441e-30	2.2591e-29
PDHA1	498.442	-0.731018	0.0635847	-11.4968	1.36971e-30	2.26582e-29
PBX3	3779.39	0.740667	0.0644447	11.4931	1.42961e-30	2.36275e-29
LEMD3	903.949	1.33499	0.116179	11.4909	1.46621e-30	2.42104e-29
RWDD1	1095.52	-0.936703	0.0815247	-11.4898	1.48441e-30	2.44888e-29
ATF4	1196.72	-1.9949	0.173792	-11.4787	1.68795e-30	2.78213e-29
AC092828.1	79.765	1.81991	0.158548	11.4786	1.68958e-30	2.7823e-29
SNX15	58.7871	-1.32427	0.115372	-11.4782	1.69757e-30	2.79292e-29
AC015912.3	43.4686	-1.87045	0.163049	-11.4717	1.83094e-30	3.00963e-29
MYNN	581.025	-0.680648	0.0593417	-11.47	1.86707e-30	3.06423e-29
DNAJB11	195.117	-1.25526	0.109439	-11.47	1.86753e-30	3.06423e-29
FOPNL	146.121	-0.798851	0.0696495	-11.4696	1.87545e-30	3.07445e-29
STK33	4932.42	0.710378	0.0619364	11.4695	1.87796e-30	3.0758e-29
SPIN1	1157.85	0.579213	0.0505084	11.4677	1.91785e-30	3.1383e-29
UBN2	1010.78	0.549065	0.0478867	11.4659	1.95659e-30	3.19882e-29
EIF1AX	907.592	-1.64839	0.143857	-11.4586	2.12994e-30	3.47909e-29
ROCK2	1490.55	0.566249	0.0494182	11.4583	2.13642e-30	3.48654e-29
AC005899.7	46.8351	1.9565	0.170869	11.4503	2.34276e-30	3.81986e-29
PPP6R3	2678.75	0.526465	0.0459803	11.4498	2.35718e-30	3.83992e-29
NDUFA8	441.1	-1.56596	0.136779	-11.4488	2.38404e-30	3.8802e-29
EIF4G2	720.615	-1.47461	0.128804	-11.4485	2.39293e-30	3.89118e-29
PIGBOS1	112.527	-0.950464	0.0830309	-11.4471	2.4312e-30	3.94954e-29
BECN1	145.283	-0.798424	0.0697494	-11.447	2.43316e-30	3.94954e-29
AC108471.2	102.016	0.847295	0.0740196	11.4469	2.43702e-30	3.95228e-29
AKIRIN2	310.513	-0.915175	0.0799716	-11.4437	2.52739e-30	4.09519e-29
C16orf87	126.435	-0.937193	0.0819144	-11.4411	2.60462e-30	4.21655e-29
TOR1AIP1	181.809	-0.711002	0.0621529	-11.4396	2.65257e-30	4.29037e-29
NABP2	113.199	-1.42301	0.124423	-11.4368	2.73735e-30	4.42356e-29
CDC123	364.04	-0.533397	0.0466563	-11.4325	2.87816e-30	4.64697e-29
LRRFIP2	1330.63	0.43551	0.0381082	11.4282	3.02222e-30	4.87524e-29
SMIM15	141.159	-1.92256	0.168269	-11.4255	3.11873e-30	5.02647e-29
TMCC2	350.956	-1.1386	0.09966	-11.4248	3.14333e-30	5.06163e-29
TMED9	380.806	-1.49003	0.130442	-11.423	3.21115e-30	5.16625e-29
OPA3	516.473	-0.857301	0.0750585	-11.4218	3.25542e-30	5.2284e-29
SNHG11	60.169	-1.31421	0.115062	-11.4218	3.25553e-30	5.2284e-29
SWI5	315.567	-1.0089	0.0883578	-11.4184	3.38474e-30	5.43111e-29
NELFCD	364.343	-0.630581	0.0552271	-11.418	3.40097e-30	5.45235e-29
BLOC1S2	197.525	-1.2792	0.112103	-11.4109	3.68807e-30	5.90741e-29
STK11	144.656	0.882234	0.0773278	11.409	3.77012e-30	6.03351e-29
CREG1	543.863	-0.803467	0.0704383	-11.4067	3.87221e-30	6.19145e-29
FAM177A1	602.915	-0.669887	0.058774	-11.3977	4.29419e-30	6.86014e-29
DDX28	24.8774	-1.89097	0.16594	-11.3955	4.40165e-30	7.02563e-29
SLC38A2	323.008	-1.43354	0.125821	-11.3935	4.5061e-30	7.18605e-29
AMZ2	131.201	-1.40032	0.122921	-11.392	4.58192e-30	7.30055e-29
ZNF334	233.474	1.00903	0.0886155	11.3866	4.87714e-30	7.76414e-29
AC093495.1	83.8954	1.82967	0.160696	11.3859	4.91365e-30	7.81542e-29
BRWD3	968.461	0.819806	0.072007	11.3851	4.96136e-30	7.88439e-29
DCAF11	253.761	-0.685535	0.060219	-11.384	5.02314e-30	7.97561e-29
AC016876.1	29.9462	-1.84867	0.162457	-11.3794	5.29375e-30	8.39794e-29
GCC1	27.0279	-1.45753	0.12809	-11.3789	5.32625e-30	8.44213e-29
ZNF670	212.174	-0.858222	0.0754251	-11.3785	5.35272e-30	8.47669e-29
RRN3	391.267	-0.723535	0.0635949	-11.3773	5.42801e-30	8.58845e-29
SERPINB9	154.24	-2.64547	0.232532	-11.3768	5.45833e-30	8.62891e-29
CACNA2D4	6540	0.71167	0.0625696	11.374	5.63185e-30	8.89549e-29
BNIP2	521.854	-0.639364	0.0562184	-11.3729	5.70829e-30	9.0084e-29
LRRC59	103.935	-1.3483	0.118582	-11.3701	5.89029e-30	9.28756e-29
UBQLN2	197.092	-1.31919	0.11603	-11.3694	5.93713e-30	9.35329e-29
NR3C2	2715.27	0.763899	0.0672033	11.367	6.10603e-30	9.61104e-29
AC087241.2	10.8123	-2.96912	0.261279	-11.3638	6.33386e-30	9.96103e-29
NDUFA1	1151.84	-2.15848	0.189951	-11.3634	6.36531e-30	1.00018e-28
RPL34	3856.76	-2.82556	0.248704	-11.3611	6.52891e-30	1.025e-28
CSNK1G2	325.704	0.971713	0.085547	11.3588	6.70387e-30	1.05157e-28
PSMA1	510.005	-1.00564	0.0885406	-11.3579	6.77553e-30	1.06189e-28
RP2	169.529	-0.690841	0.0608289	-11.3571	6.8363e-30	1.07049e-28
NEU1	134.005	-1.44588	0.127343	-11.3542	7.06645e-30	1.10558e-28
DNTTIP1	315.962	-0.795211	0.0700554	-11.3512	7.31842e-30	1.14401e-28
CCDC7	1512.73	0.905687	0.0797957	11.3501	7.41037e-30	1.15739e-28
MRPL32	157.565	-1.44804	0.127591	-11.3491	7.49516e-30	1.16963e-28
ARL6IP1	2884.79	-1.90826	0.168192	-11.3457	7.78962e-30	1.21454e-28
HIST1H1C	322.744	-1.97648	0.174278	-11.3409	8.22696e-30	1.28163e-28
TTC37	1018.74	0.524773	0.0462765	11.3399	8.32042e-30	1.29508e-28
SSB	639.678	-1.07039	0.0943989	-11.339	8.41439e-30	1.30835e-28
AAR2	110.087	-0.678161	0.0598084	-11.3389	8.42009e-30	1.30835e-28
EPS15	1198.74	0.735642	0.0649142	11.3325	9.05615e-30	1.40599e-28
SNX12	113.208	-0.830634	0.0733269	-11.3278	9.55599e-30	1.48232e-28
SART1	247.565	-0.486315	0.0429424	-11.3248	9.88857e-30	1.5326e-28
SELENOS	428.584	-1.34502	0.118769	-11.3247	9.90339e-30	1.53359e-28
TM9SF1	122.277	-1.03776	0.091653	-11.3227	1.01274e-29	1.56694e-28
MFN1	508.228	0.525028	0.0463701	11.3226	1.01474e-29	1.56871e-28
MAP3K4	751.83	0.60662	0.0535788	11.322	1.02088e-29	1.57686e-28
PRKCSH	174.545	-1.12149	0.099101	-11.3167	1.08497e-29	1.67443e-28
RPLP2	1620.68	-2.44684	0.216225	-11.3162	1.09114e-29	1.68251e-28
RIOK1	192.738	-0.835259	0.0738269	-11.3137	1.12197e-29	1.7286e-28
PRDM5	512.671	0.866742	0.076614	11.3131	1.13018e-29	1.73978e-28
R3HCC1	680.357	-1.05261	0.0930573	-11.3115	1.15157e-29	1.7712e-28
DPP3	470.146	-1.17971	0.104306	-11.3101	1.1697e-29	1.79756e-28
TCF12	4299.43	0.587468	0.0519502	11.3083	1.1938e-29	1.83305e-28
IMPG2	8985.95	0.915876	0.0809954	11.3078	1.20124e-29	1.84291e-28
MBD5	5419	0.696363	0.0615864	11.3071	1.21026e-29	1.85519e-28
PSMA2	427.685	-1.56209	0.138173	-11.3053	1.23508e-29	1.89164e-28
NDUFAF3	263.813	-2.13486	0.188893	-11.3019	1.2834e-29	1.96399e-28
ARHGAP39	467.712	0.705914	0.062469	11.3002	1.30877e-29	2.00114e-28
DDOST	252.325	-0.961001	0.0850464	-11.2997	1.31627e-29	2.01091e-28
NDUFS6	814.143	-1.62288	0.143623	-11.2996	1.31855e-29	2.0127e-28
AUP1	247.485	-1.35353	0.11979	-11.2992	1.32448e-29	2.02005e-28
FGFR1OP	1183.17	0.533393	0.047216	11.2969	1.35977e-29	2.07214e-28
RAB8A	115.588	-0.96736	0.0856655	-11.2923	1.43247e-29	2.1811e-28
RDH12	3629.13	-1.28798	0.114078	-11.2903	1.46507e-29	2.22886e-28
R3HDM1	2136.05	0.583356	0.0516919	11.2852	1.55204e-29	2.3592e-28
AP005131.6	52.4036	2.26244	0.200504	11.2837	1.57878e-29	2.39784e-28
SIN3B	167.636	0.919815	0.0815326	11.2816	1.61852e-29	2.45615e-28
EXOC2	1027.67	0.68943	0.0611117	11.2815	1.62016e-29	2.45659e-28
VBP1	308.201	-1.70184	0.150894	-11.2784	1.67717e-29	2.54092e-28
TEX264	319.026	-1.01158	0.0897088	-11.2762	1.71945e-29	2.60279e-28
SOX15	67.6747	-1.68768	0.149694	-11.2742	1.7594e-29	2.66105e-28
HDAC1	270.267	-0.550179	0.0488126	-11.2713	1.81955e-29	2.74974e-28
DDX54	103.725	-0.754543	0.0669452	-11.2711	1.82377e-29	2.75384e-28
PSMD6	270.015	-1.13509	0.100734	-11.2681	1.88599e-29	2.84542e-28
POLR2D	109.835	-0.850346	0.0754958	-11.2635	1.98739e-29	2.99344e-28
VPS41	651.064	0.719992	0.0639224	11.2635	1.98628e-29	2.99344e-28
SNW1	836.646	-0.504913	0.044838	-11.2608	2.04875e-29	3.08075e-28
CCDC124	133.869	-1.71047	0.151895	-11.2608	2.048e-29	3.08075e-28
RHBDD1	784.732	0.672411	0.0597382	11.256	2.16481e-29	3.25258e-28
RPS25	3026.83	-2.80611	0.249313	-11.2553	2.17994e-29	3.27261e-28
DTNBP1	1558.97	-0.723234	0.0642684	-11.2533	2.23011e-29	3.34517e-28
MAF1	181.984	-1.52683	0.135694	-11.252	2.26376e-29	3.39284e-28
TCERG1	975.329	0.527078	0.0468529	11.2496	2.32554e-29	3.48256e-28
AC100810.1	110.764	-1.57525	0.140102	-11.2436	2.49087e-29	3.72707e-28
ZFYVE16	1174.73	0.657213	0.0584745	11.2393	2.61405e-29	3.90817e-28
INPP5K	188.377	-0.748373	0.0666038	-11.2362	2.70808e-29	4.04543e-28
SERPINB6	918.892	0.650686	0.0579135	11.2355	2.72999e-29	4.07481e-28
CDC42BPB	889.132	0.673905	0.0599846	11.2346	2.75644e-29	4.11092e-28
MZT1	230.625	-1.44733	0.128907	-11.2277	2.98081e-29	4.4419e-28
CEP120	561.133	0.839398	0.0747623	11.2276	2.9859e-29	4.44583e-28
PAXIP1	282.494	0.566565	0.0504741	11.2249	3.07876e-29	4.58035e-28
PYCR2	257.55	-1.34213	0.119573	-11.2243	3.09723e-29	4.60406e-28
APEX1	343.264	-1.46756	0.130808	-11.2192	3.28098e-29	4.87322e-28
GFER	60.1289	-1.44124	0.12847	-11.2185	3.30776e-29	4.90899e-28
CHRNB1	48.0325	-1.31672	0.11738	-11.2176	3.34224e-29	4.95611e-28
SRC	130.048	1.14617	0.102208	11.2141	3.47876e-29	5.15435e-28
NR4A1	216.133	-2.47327	0.220583	-11.2124	3.54453e-29	5.24752e-28
CLPTM1	366.104	-0.779768	0.0695611	-11.2098	3.64848e-29	5.39701e-28
HMBOX1	1445.09	0.709695	0.0633372	11.205	3.85251e-29	5.68957e-28
ERGIC3	267.403	-1.23195	0.109945	-11.2051	3.85021e-29	5.68957e-28
KDM4C	4243.99	0.953543	0.0851075	11.204	3.89803e-29	5.75213e-28
CBX1	359.865	-0.71698	0.0640115	-11.2008	4.04081e-29	5.95798e-28
TAF1A-AS1	33.1406	-1.69455	0.151292	-11.2005	4.05293e-29	5.97101e-28
AGAP2-AS1	22.9559	-1.77068	0.158098	-11.1999	4.08328e-29	6.00598e-28
COPE	476.104	-1.3556	0.121037	-11.1999	4.08133e-29	6.00598e-28
PFN1	176.693	-2.07583	0.185388	-11.1972	4.20848e-29	6.18513e-28
EXOSC4	51.2526	-1.60253	0.143185	-11.192	4.46304e-29	6.55397e-28
DYNC2H1	2974.31	0.62545	0.0558972	11.1893	4.60085e-29	6.75088e-28
PRR13	148.659	-1.40947	0.125976	-11.1884	4.64719e-29	6.81337e-28
NDUFA12	579.06	-1.35674	0.121314	-11.1838	4.89749e-29	7.17457e-28
CUL9	156.145	0.794749	0.0710967	11.1784	5.20039e-29	7.61217e-28
TRMT10C	180.534	-1.49742	0.133968	-11.1775	5.25781e-29	7.69002e-28
FGD3	515.05	1.2938	0.115761	11.1765	5.31163e-29	7.76249e-28
FAM193B	496.28	0.721563	0.0645663	11.1755	5.37168e-29	7.84394e-28
MED31	299.016	-1.07743	0.0964222	-11.1741	5.46176e-29	7.96908e-28
WNK1	2183.83	0.615015	0.0550407	11.1738	5.47755e-29	7.98571e-28
MAB21L1	913.682	-1.416	0.126777	-11.1692	5.76953e-29	8.40465e-28
VPS54	1299.1	0.666026	0.0596322	11.1689	5.79052e-29	8.42848e-28
MRPL57	433.303	-1.55722	0.13943	-11.1684	5.81891e-29	8.46302e-28
CCDC43	178.111	-1.15358	0.103322	-11.1649	6.05595e-29	8.80073e-28
EID1	1400.26	-1.60075	0.143378	-11.1645	6.08371e-29	8.83401e-28
C1orf52	250.358	-0.749259	0.0671242	-11.1623	6.23638e-29	9.04125e-28
COQ7	292.797	-0.72611	0.06505	-11.1623	6.23297e-29	9.04125e-28
TIGD3	17.4098	-1.70522	0.152798	-11.16	6.40163e-29	9.27344e-28
RBMX	1424.75	-0.873928	0.0783243	-11.1578	6.55831e-29	9.49284e-28
WBP4	476.365	-0.899329	0.0806037	-11.1574	6.58786e-29	9.52802e-28
PSMA7	674.553	-1.58446	0.142038	-11.1552	6.75518e-29	9.76226e-28
ORMDL2	128.862	-1.69127	0.151689	-11.1496	7.19163e-29	1.03847e-27
RNF181	149.325	-2.0088	0.180209	-11.1471	7.39829e-29	1.06747e-27
ALG13	623.669	0.76434	0.0685796	11.1453	7.54928e-29	1.08839e-27
COX17	1040.89	-2.32967	0.209029	-11.1452	7.55941e-29	1.08899e-27
HAP1	11.8304	-2.31193	0.207451	-11.1444	7.6217e-29	1.09709e-27
STX5	368.086	-0.599371	0.0537931	-11.1421	7.82193e-29	1.12502e-27
MYL6	4032.25	-1.54406	0.138583	-11.1417	7.85741e-29	1.12923e-27
RPL36A	866.924	-2.57045	0.230709	-11.1415	7.87555e-29	1.13094e-27
FBXO32	1896.7	-0.818318	0.0734892	-11.1352	8.4537e-29	1.21301e-27
BNIP1	123.217	-0.801605	0.0719946	-11.1342	8.5474e-29	1.22549e-27
UMAD1	3564.46	0.554288	0.049784	11.1339	8.58336e-29	1.22967e-27
HAS2-AS1	6.89106	-2.34195	0.210419	-11.1299	8.96915e-29	1.28393e-27
AC055811.1	62	1.86157	0.167356	11.1234	9.65488e-29	1.38101e-27
CDKN2AIPNL	221.01	-1.25204	0.112577	-11.1216	9.84856e-29	1.4076e-27
SPAST	683.939	0.564471	0.0507646	11.1194	1.00956e-28	1.44064e-27
MPRIP	812.387	0.743281	0.0668452	11.1194	1.00909e-28	1.44064e-27
BOLA1	90.9478	-1.42519	0.128216	-11.1155	1.05432e-28	1.50333e-27
INAFM1	404.001	1.24149	0.111697	11.1148	1.06252e-28	1.51384e-27
BRD1	413.522	1.17785	0.105984	11.1134	1.07921e-28	1.53642e-27
SMAD2	2341.11	0.599507	0.0539449	11.1133	1.08058e-28	1.53716e-27
RITA1	68.035	-0.973075	0.0875834	-11.1103	1.11815e-28	1.58936e-27
TMEM256	220.508	-1.83394	0.16507	-11.1101	1.12085e-28	1.59195e-27
PEX10	154.502	-0.748077	0.0673342	-11.1099	1.12287e-28	1.59358e-27
EFCAB13	345.606	1.18996	0.10713	11.1076	1.15152e-28	1.63296e-27
CETN2	198.717	-1.88712	0.16991	-11.1066	1.16528e-28	1.65119e-27
NAA10	157.822	-1.30692	0.117683	-11.1054	1.18076e-28	1.67182e-27
EXOSC5	53.7084	-1.44625	0.130249	-11.1037	1.2036e-28	1.70284e-27
MANSC1	126.929	-1.03542	0.0932552	-11.103	1.21242e-28	1.71399e-27
GLTP	125.967	-0.894489	0.080569	-11.1022	1.22454e-28	1.72977e-27
CHMP2A	428.82	-1.77255	0.159663	-11.1018	1.22927e-28	1.7351e-27
ABHD16A	196.998	-0.790013	0.0712068	-11.0946	1.33218e-28	1.8789e-27
TMED10	673.595	-0.712484	0.064225	-11.0936	1.34826e-28	1.89864e-27
CLPP	164.17	-1.19119	0.107376	-11.0936	1.34804e-28	1.89864e-27
PTCH1	333.144	0.86501	0.0779765	11.0932	1.35343e-28	1.90443e-27
GRB10	7632.01	1.01968	0.0919264	11.0923	1.3667e-28	1.92163e-27
ETF1	295.713	-0.792041	0.0714155	-11.0906	1.3933e-28	1.95751e-27
NDUFA5	1308.03	-1.54757	0.139553	-11.0894	1.41175e-28	1.98189e-27
GALT	240.628	-0.749469	0.0675927	-11.088	1.43424e-28	2.01191e-27
ZNF677	197.425	-0.786842	0.0709653	-11.0877	1.43943e-28	2.01764e-27
ARHGAP17	377.473	0.699252	0.0631034	11.081	1.55048e-28	2.17162e-27
NDUFA9	624.876	-0.618291	0.0558003	-11.0804	1.56122e-28	2.18499e-27
CPLX4	2769.8	-0.931665	0.0840996	-11.0781	1.60226e-28	2.2407e-27
MTRF1L	417.762	-0.806522	0.072804	-11.078	1.6043e-28	2.24182e-27
PCNA	610.753	-1.64321	0.148345	-11.0769	1.6234e-28	2.26677e-27
LRRC57	576.549	-0.764885	0.0690953	-11.07	1.75417e-28	2.44749e-27
TSPYL2	192.182	-1.59825	0.144413	-11.0672	1.80874e-28	2.52169e-27
AKT1S1	71.736	-1.28034	0.115716	-11.0645	1.86507e-28	2.59823e-27
MRPL34	349.741	-1.28006	0.1157	-11.0636	1.88337e-28	2.62172e-27
MRPL47	241.854	-1.4465	0.13075	-11.0631	1.89415e-28	2.63471e-27
SNED1	176.163	1.39495	0.126103	11.062	1.91809e-28	2.66597e-27
HSPA1B	1174.72	-4.26932	0.38623	-11.0538	2.10035e-28	2.91707e-27
MKLN1	2757.31	0.567525	0.0513474	11.0526	2.12852e-28	2.95393e-27
ATP6V0E2-AS1	258.528	-1.01023	0.0914048	-11.0523	2.13783e-28	2.96459e-27
RALGAPA1	3485.98	0.523358	0.047358	11.0511	2.16579e-28	3.00107e-27
HIST1H4C	1464.77	-2.68578	0.243153	-11.0457	2.30095e-28	3.18593e-27
URI1	1502.96	0.788913	0.0714255	11.0453	2.31099e-28	3.1974e-27
NR4A3	66.721	-2.72527	0.24677	-11.0438	2.3489e-28	3.24738e-27
NOP53	882.07	-2.27004	0.205594	-11.0414	2.41353e-28	3.33419e-27
GSTP1	1523.49	-2.17348	0.196861	-11.0407	2.4318e-28	3.35689e-27
RALGAPA2	826.783	0.835899	0.0757201	11.0393	2.46857e-28	3.40505e-27
EGFLAM	4289.93	0.738789	0.0669629	11.0328	2.65442e-28	3.65863e-27
AP3M1	359.341	-0.782748	0.0709526	-11.032	2.67889e-28	3.68957e-27
AC128707.1	3003.2	1.67868	0.152168	11.0317	2.68648e-28	3.69722e-27
NCOA2	3638.61	0.537313	0.0487166	11.0293	2.75863e-28	3.79364e-27
RCOR3	1130.61	0.546132	0.0495174	11.0291	2.7667e-28	3.80186e-27
EEA1	1963.45	0.674878	0.0612148	11.0248	2.90302e-28	3.98617e-27
ALX3	16.0527	2.61901	0.23768	11.0191	3.09298e-28	4.2438e-27
LRBA	3660.99	0.693511	0.0629584	11.0154	3.22174e-28	4.41713e-27
ATP9B	1631.11	0.660408	0.0599641	11.0134	3.29376e-28	4.51248e-27
PDCL3	113.861	-1.89435	0.172176	-11.0024	3.72158e-28	5.09476e-27
DGUOK	445.483	-0.593844	0.0539776	-11.0017	3.75072e-28	5.13078e-27
B3GAT2	135.467	-1.2457	0.113232	-11.0014	3.76317e-28	5.14394e-27
CBX3	1238.37	-0.985311	0.0895913	-10.9978	3.91381e-28	5.34584e-27
BMT2	734.183	0.684194	0.0622448	10.992	4.17628e-28	5.70006e-27
AC104806.2	153.79	1.56798	0.142653	10.9916	4.1957e-28	5.71797e-27
GTF2F1	260.813	-0.91034	0.0828216	-10.9916	4.19531e-28	5.71797e-27
RPL35A	2375.38	-2.4747	0.225185	-10.9896	4.28775e-28	5.83904e-27
CKS2	81.3579	-2.31202	0.210396	-10.9889	4.32122e-28	5.88023e-27
MYO5A	1326.73	0.598818	0.0545083	10.9858	4.47236e-28	6.08133e-27
RUNDC1	188.678	-0.798558	0.0727026	-10.9839	4.56742e-28	6.20596e-27
TNKS	2577.14	0.707159	0.0643868	10.983	4.61457e-28	6.26533e-27
ASL	224.851	-1.33041	0.121158	-10.9808	4.72596e-28	6.41179e-27
CIAPIN1	173.36	-0.734727	0.0669597	-10.9727	5.17278e-28	7.01276e-27
RPP25	368.921	-2.27115	0.206985	-10.9726	5.1789e-28	7.01582e-27
GPN3	259.563	-1.23689	0.112728	-10.9723	5.19137e-28	7.02671e-27
KIF16B	555.809	0.813407	0.074133	10.9723	5.19467e-28	7.02671e-27
CCDC92	526.409	0.786622	0.0717178	10.9683	5.42856e-28	7.33764e-27
BZW1	264.427	-1.21841	0.111086	-10.9682	5.43333e-28	7.33863e-27
BORCS6	80.9821	-1.68216	0.153371	-10.9679	5.44972e-28	7.3553e-27
EEF1D	581.685	-1.57582	0.143714	-10.965	5.63209e-28	7.5958e-27
FKBP4	317.389	-1.90166	0.173432	-10.9649	5.63788e-28	7.59798e-27
AC018809.2	24.4132	1.46291	0.133433	10.9637	5.71377e-28	7.68885e-27
ANK3	16770.3	0.739601	0.0674589	10.9637	5.71028e-28	7.68885e-27
CNOT6	600.636	0.539834	0.0492589	10.9591	6.00893e-28	8.08006e-27
AC124016.1	451.003	-0.832872	0.076027	-10.9549	6.29161e-28	8.45391e-27
PIGA	54.4218	-1.11635	0.10192	-10.9532	6.41726e-28	8.61638e-27
RRM1	299.308	-0.526272	0.0480721	-10.9476	6.82583e-28	9.15819e-27
SLC35B2	59.4109	-1.59403	0.145664	-10.9432	7.16611e-28	9.60767e-27
TCEAL8	253.665	-1.84541	0.168669	-10.941	7.33484e-28	9.82663e-27
GAR1	168.247	-0.712116	0.0650994	-10.9389	7.5097e-28	1.00535e-26
NDUFA2	558.045	-2.14448	0.196099	-10.9357	7.77965e-28	1.04072e-26
RPS13	2964.72	-2.55563	0.233722	-10.9344	7.88854e-28	1.05451e-26
RPS26	1282.38	-2.30775	0.211063	-10.9339	7.93352e-28	1.05975e-26
OSGEPL1-AS1	61.1406	-1.19342	0.109153	-10.9334	7.97801e-28	1.06491e-26
AL163051.1	26.0328	-1.74368	0.159562	-10.9279	8.48031e-28	1.13112e-26
ANKS1A	4376.67	0.711657	0.0651376	10.9254	8.71168e-28	1.16113e-26
COX16	507.671	-0.721059	0.0660002	-10.9251	8.7436e-28	1.16453e-26
GORASP1	143.298	-0.753127	0.0689408	-10.9243	8.82608e-28	1.17466e-26
MRPL24	119.505	-1.20655	0.110484	-10.9206	9.18775e-28	1.2219e-26
KIAA1109	2929.58	0.760397	0.0696338	10.9199	9.25555e-28	1.23001e-26
ZNF354C	178.007	0.621444	0.0569258	10.9167	9.58785e-28	1.27324e-26
YIPF2	174.835	-0.903805	0.0827915	-10.9166	9.59817e-28	1.27368e-26
SAP18	601.789	-1.87036	0.171394	-10.9127	1.00286e-27	1.32983e-26
TOR1B	144.016	-0.886841	0.0812776	-10.9113	1.01832e-27	1.34935e-26
BAG6	438.997	-0.852361	0.0781308	-10.9094	1.0394e-27	1.37628e-26
MED13L	4375.75	0.668555	0.0612854	10.9089	1.04535e-27	1.38315e-26
BTF3	819.776	-2.08376	0.191043	-10.9072	1.06432e-27	1.40722e-26
TRMT6	65.4995	-1.2149	0.111401	-10.9056	1.08389e-27	1.43206e-26
AP001160.1	48.65	-1.4171	0.130006	-10.9003	1.14906e-27	1.51706e-26
NBDY	685.378	-0.80574	0.0739399	-10.8972	1.18816e-27	1.56755e-26
ISCA1	356.065	-1.1433	0.104934	-10.8954	1.21238e-27	1.59834e-26
MRPS15	135.408	-1.21811	0.111812	-10.8943	1.2264e-27	1.61565e-26
RFK	189.398	-1.67919	0.154168	-10.8919	1.25951e-27	1.65807e-26
ZNF688	106.672	-0.880007	0.0808467	-10.8849	1.36061e-27	1.78986e-26
SCNM1	160.257	-0.966707	0.0888801	-10.8765	1.49139e-27	1.96049e-26
CYP2R1	190.923	-0.701696	0.0645153	-10.8764	1.49276e-27	1.96087e-26
EI24	210.477	-1.0703	0.0984082	-10.8761	1.49783e-27	1.9661e-26
CLIP4	765.109	0.812622	0.0747595	10.8698	1.60507e-27	2.10535e-26
ATAD5	430.376	0.732509	0.0673986	10.8683	1.63203e-27	2.13917e-26
GTF3C6	202.752	-1.53334	0.141171	-10.8616	1.75677e-27	2.30101e-26
KCNIP2	62.7907	1.31564	0.121151	10.8595	1.79704e-27	2.35207e-26
SERTAD1	12.1804	-3.37906	0.311253	-10.8563	1.86122e-27	2.43431e-26
UBC	3980.37	-2.08681	0.192236	-10.8554	1.87903e-27	2.45585e-26
CCNY	2716.03	0.685446	0.0631445	10.8552	1.88396e-27	2.46052e-26
TCF4	1974.14	0.984392	0.0907242	10.8504	1.98578e-27	2.59164e-26
BAG3	56.5937	-3.79371	0.34966	-10.8497	2.00006e-27	2.6084e-26
HBP1	614.256	0.723347	0.0666747	10.8489	2.01849e-27	2.63055e-26
NEUROD1	2829.69	-1.63078	0.150475	-10.8376	2.28508e-27	2.97584e-26
SYNE2	13975.2	0.749686	0.0691772	10.8372	2.29426e-27	2.98566e-26
ZNF655	460.833	0.63906	0.0589756	10.836	2.32359e-27	3.02167e-26
ALS2	596.514	0.510347	0.0471026	10.8348	2.35474e-27	3.05999e-26
TMEM70	117.79	-1.30003	0.120001	-10.8335	2.38978e-27	3.1033e-26
CNOT2	1264.19	0.45609	0.0421005	10.8334	2.39183e-27	3.10375e-26
DNAJC6	1894.21	0.624715	0.0576762	10.8314	2.44329e-27	3.16826e-26
SLC31A2	35.7524	-1.06511	0.0983493	-10.8299	2.48496e-27	3.22e-26
ATP6V0D1	344.813	-0.803046	0.0741626	-10.8282	2.53133e-27	3.27775e-26
TEKT1	8.02371	-2.76364	0.255294	-10.8253	2.61218e-27	3.38002e-26
FKBP3	592.489	-1.22121	0.112814	-10.825	2.62209e-27	3.39045e-26
IFI27L2	669.708	-2.24745	0.207683	-10.8215	2.7217e-27	3.51674e-26
CCDC115	146.15	-1.41851	0.131091	-10.8208	2.74323e-27	3.54204e-26
PSMC3	243.095	-1.51998	0.140499	-10.8184	2.8165e-27	3.63407e-26
C2orf69	213.27	-0.989109	0.0914581	-10.8149	2.9265e-27	3.77331e-26
THYN1	182.248	-1.07204	0.0991411	-10.8133	2.97689e-27	3.83557e-26
FANCL	687.973	0.606419	0.0560924	10.8111	3.05061e-27	3.92777e-26
BOD1L1	1368.98	0.900382	0.0833069	10.808	3.15422e-27	4.05829e-26
R3HDM2	2493.32	0.636016	0.0588651	10.8046	3.27248e-27	4.20747e-26
TPGS1	150.056	-1.35007	0.125016	-10.7992	3.47352e-27	4.46279e-26
TOMM22	155.205	-2.3507	0.217705	-10.7976	3.53152e-27	4.53411e-26
SNX24	714.702	0.608734	0.0563793	10.7971	3.5521e-27	4.55732e-26
TAF1	1497.15	0.678411	0.0628417	10.7956	3.61269e-27	4.63179e-26
ST13	984.992	-1.38702	0.12849	-10.7948	3.64236e-27	4.66653e-26
AC110491.3	111.996	1.95913	0.181566	10.7902	3.82957e-27	4.90292e-26
DUSP12	181.987	-0.888408	0.0823435	-10.789	3.87812e-27	4.96159e-26
RNASEK	831.266	-1.50404	0.139412	-10.7885	3.90083e-27	4.98714e-26
PHF2	300.035	0.613137	0.0568453	10.7861	4.00603e-27	5.11804e-26
PIN4	453.637	-0.742711	0.0688655	-10.785	4.05412e-27	5.17584e-26
TMEM50A	476.731	-1.05058	0.0974265	-10.7833	4.12725e-27	5.2655e-26
POU2F1	3374.72	0.614564	0.0569964	10.7825	4.16364e-27	5.30821e-26
OSBPL2	279.916	0.521188	0.0483542	10.7785	4.34689e-27	5.53794e-26
SF3B4	111.403	-1.03992	0.0964823	-10.7784	4.35443e-27	5.54366e-26
CASC1	783.581	0.564731	0.0524106	10.7751	4.51088e-27	5.73882e-26
BTBD8	904.05	1.09452	0.101585	10.7744	4.54713e-27	5.78089e-26
IMPA1	189.676	-0.850528	0.0789508	-10.7729	4.62285e-27	5.87306e-26
KIAA0100	270.211	0.60772	0.0564296	10.7695	4.79482e-27	6.08728e-26
DNAJC30	162.488	-0.797098	0.0740147	-10.7694	4.79885e-27	6.08814e-26
PAIP1	760.166	-0.688209	0.0639094	-10.7685	4.84784e-27	6.14601e-26
C11orf1	109.862	-1.42886	0.132789	-10.7604	5.29465e-27	6.70778e-26
RALGPS2	7874.5	0.723116	0.0672239	10.7568	5.50303e-27	6.96693e-26
STIP1	491.161	-1.77	0.164562	-10.7558	5.56488e-27	7.04033e-26
PATJ	2544.32	0.659753	0.0613512	10.7537	5.69194e-27	7.19607e-26
PKN2	2956.01	0.587004	0.0546011	10.7508	5.87726e-27	7.42519e-26
AC012442.2	193.071	1.03205	0.0960087	10.7495	5.95685e-27	7.52053e-26
IER5	49.9093	-2.2999	0.21403	-10.7457	6.20882e-27	7.82776e-26
SMIM30	221.374	-2.22576	0.20713	-10.7457	6.20679e-27	7.82776e-26
NDUFB4	823.111	-1.65565	0.1541	-10.744	6.32552e-27	7.96937e-26
CKAP5	1122.49	0.540718	0.0503946	10.7297	7.38497e-27	9.29769e-26
SYNGAP1	194.115	0.897989	0.0836934	10.7295	7.39882e-27	9.30869e-26
TEN1	36.4764	-1.28144	0.119449	-10.7279	7.52927e-27	9.46626e-26
H2AFZ	1300.78	-1.77323	0.16531	-10.7267	7.62759e-27	9.58272e-26
SLC3A2	204.694	-1.29379	0.120614	-10.7266	7.63244e-27	9.58272e-26
SNRPE	313.331	-1.51494	0.14128	-10.723	7.94267e-27	9.96534e-26
MSH3	945.813	0.509126	0.0474843	10.722	8.0277e-27	1.00651e-25
SREK1IP1	475.347	-0.936073	0.0873055	-10.7218	8.04179e-27	1.00758e-25
LRRC37A	130.392	2.01922	0.188359	10.7201	8.19406e-27	1.02595e-25
LINC01535	280.373	0.988004	0.0921739	10.7189	8.29711e-27	1.03814e-25
PRKACB	5060.16	0.753259	0.0702804	10.7179	8.38805e-27	1.0488e-25
ALKBH7	596.605	-1.99727	0.186403	-10.7148	8.67308e-27	1.08369e-25
NCAM1	4366.32	0.758686	0.0708189	10.713	8.84011e-27	1.1038e-25
NBEAL1	1052.64	0.54692	0.0510558	10.7122	8.92065e-27	1.11309e-25
RNH1	731.843	-0.785219	0.0733018	-10.7121	8.9277e-27	1.11321e-25
SIRT6	125.696	-0.843309	0.0787464	-10.7092	9.21748e-27	1.14855e-25
ENDOV	447.433	-0.630973	0.0589318	-10.7068	9.45466e-27	1.1773e-25
INVS	1761.26	0.623557	0.058258	10.7034	9.81483e-27	1.22131e-25
SMAD4	854.735	0.828442	0.0774182	10.7009	1.00841e-26	1.25396e-25
UNC80	3079.63	0.795209	0.0743134	10.7007	1.00964e-26	1.25463e-25
NDUFS7	442.871	-1.29179	0.120745	-10.6985	1.03473e-26	1.28405e-25
COX6B1	998.507	-1.91496	0.178994	-10.6985	1.0347e-26	1.28405e-25
AC007038.1	457.667	0.927567	0.0867254	10.6955	1.06894e-26	1.3256e-25
TTC1	1018.28	-0.575537	0.0538307	-10.6916	1.11419e-26	1.38078e-25
CEP57L1	533.558	0.56658	0.0529957	10.6911	1.12085e-26	1.38808e-25
AKR1A1	376.788	-0.747667	0.0699361	-10.6907	1.12499e-26	1.39226e-25
SLC25A28	306.444	0.970229	0.0907618	10.6898	1.13571e-26	1.40457e-25
CCDC93	940.432	0.665296	0.0622402	10.6892	1.14375e-26	1.41356e-25
HINT2	183.527	-1.77773	0.166335	-10.6877	1.16262e-26	1.4359e-25
DYM	3603.93	0.804393	0.0752836	10.6848	1.19873e-26	1.47949e-25
MAP3K10	126.329	0.990694	0.0927308	10.6835	1.21539e-26	1.49904e-25
RUFY2	1048.72	0.509727	0.0477127	10.6833	1.21909e-26	1.50258e-25
CCDC174	390.546	-0.662153	0.0619828	-10.6828	1.22455e-26	1.50829e-25
ABT1	127.093	-1.33894	0.125337	-10.6827	1.22608e-26	1.50915e-25
SCYL1	214.568	-0.809743	0.0758024	-10.6823	1.23196e-26	1.51536e-25
PHIP	3614.29	0.524408	0.0490976	10.6809	1.25014e-26	1.53668e-25
TMCO1	857.262	-0.885221	0.082896	-10.6787	1.28064e-26	1.57312e-25
EIF3F	622.326	-1.63991	0.15359	-10.6772	1.3015e-26	1.59766e-25
ZNF593	56.8293	-2.0689	0.193824	-10.6741	1.34502e-26	1.64996e-25
AL357153.2	962.95	1.07123	0.10036	10.6739	1.34865e-26	1.6533e-25
CLP1	39.2551	-1.47538	0.138275	-10.6699	1.4074e-26	1.72416e-25
ZNF626	527.794	0.580086	0.0543766	10.6679	1.43786e-26	1.76029e-25
GCHFR	91.757	-1.74466	0.163553	-10.6672	1.44852e-26	1.77214e-25
SUPT3H	3607.76	0.685803	0.0643017	10.6654	1.47774e-26	1.80667e-25
ACP5	160.531	-1.55946	0.146271	-10.6615	1.54147e-26	1.88333e-25
USP12	813.755	0.624594	0.0585955	10.6594	1.5756e-26	1.92374e-25
RPL8	3589.82	-2.35969	0.22142	-10.6571	1.61599e-26	1.97173e-25
MRPL52	175.297	-1.48306	0.139188	-10.6551	1.65091e-26	2.01298e-25
LINC02043	6.97014	-2.11333	0.19835	-10.6545	1.66108e-26	2.02402e-25
LSM14B	240.739	0.788539	0.0740156	10.6537	1.67607e-26	2.04092e-25
SMIM27	189.738	-1.39789	0.131219	-10.6531	1.68704e-26	2.0529e-25
PPIP5K2	652.51	0.710541	0.0667256	10.6487	1.76827e-26	2.15031e-25
VPS45	900.309	0.465475	0.0437205	10.6466	1.80807e-26	2.19724e-25
COX7C	1413.21	-2.11332	0.198548	-10.6439	1.86177e-26	2.26099e-25
MRPL2	161.333	-1.27682	0.119979	-10.6421	1.89873e-26	2.30434e-25
SNHG15	111.458	-1.26805	0.119174	-10.6403	1.93495e-26	2.34672e-25
TTBK2	2533.85	0.593676	0.0557959	10.6401	1.93836e-26	2.34929e-25
ZNF580	142.506	-1.24617	0.117137	-10.6386	1.97024e-26	2.38634e-25
ALKBH5	641.382	-0.920631	0.0865384	-10.6384	1.97474e-26	2.3902e-25
FSCN3	13.2513	-1.80375	0.169567	-10.6374	1.99584e-26	2.41413e-25
SMCHD1	2088.8	0.510882	0.0480364	10.6353	2.0413e-26	2.46747e-25
C15orf61	484.138	-1.48282	0.139427	-10.6351	2.04584e-26	2.46968e-25
NDUFA3	412.441	-2.01524	0.189489	-10.6351	2.04535e-26	2.46968e-25
KLF10	34.6496	-2.8626	0.26919	-10.6341	2.06719e-26	2.49379e-25
CENPS	166.973	-0.744582	0.0700264	-10.6329	2.09568e-26	2.52649e-25
PFN2	334.306	-1.71539	0.161342	-10.632	2.11501e-26	2.54811e-25
TAF12	455.144	-0.595569	0.0560617	-10.6235	2.31823e-26	2.79108e-25
KLHDC2	883.031	-0.47404	0.0446241	-10.6229	2.33079e-26	2.80436e-25
MANF	164.827	-1.26042	0.118682	-10.6202	2.40136e-26	2.88735e-25
EP400	1076.78	0.600261	0.0565323	10.618	2.45717e-26	2.95251e-25
NHLRC1	23.6164	-1.73183	0.163107	-10.6178	2.46407e-26	2.95883e-25
ELP5	395.769	-0.864296	0.081423	-10.6149	2.54109e-26	3.04931e-25
LARP7	453.646	-1.01042	0.0952007	-10.6136	2.57763e-26	3.09112e-25
SLC19A2	207.349	-0.944878	0.0890296	-10.6131	2.59088e-26	3.10496e-25
LAMP1	682.541	-0.71958	0.0678375	-10.6074	2.75297e-26	3.29703e-25
RPL36	2203.13	-2.49268	0.235065	-10.6042	2.84855e-26	3.40926e-25
ELF3	157.815	-2.35346	0.221965	-10.6028	2.89066e-26	3.45738e-25
VPS25	144.938	-1.41533	0.133512	-10.6008	2.95365e-26	3.5304e-25
RPL12	1839.89	-2.75805	0.260283	-10.5964	3.09757e-26	3.69999e-25
TMEM99	76.7995	-1.19486	0.112785	-10.5942	3.17185e-26	3.78622e-25
PDAP1	541.333	-1.29114	0.12189	-10.5927	3.22271e-26	3.84441e-25
IPO8	383.213	0.754751	0.0712557	10.5921	3.24075e-26	3.8634e-25
ZNF407	1186.51	0.927377	0.0875716	10.5899	3.31856e-26	3.95357e-25
ITPR2	3585.77	0.758096	0.071592	10.5891	3.34751e-26	3.98545e-25
ZCWPW2	345.548	0.774967	0.0732539	10.5792	3.72177e-26	4.42812e-25
ACBD7	59.0933	-1.59394	0.15067	-10.579	3.72913e-26	4.43399e-25
PEF1	148.21	-1.02295	0.096697	-10.5789	3.73319e-26	4.43591e-25
NTNG2	1461.1	0.891914	0.0843183	10.5779	3.77139e-26	4.47837e-25
RPS5	2183.42	-2.30993	0.218429	-10.5752	3.88237e-26	4.60715e-25
RNF167	347.509	-1.03895	0.0982525	-10.5742	3.9235e-26	4.65292e-25
EIF4E2	207.28	-0.70352	0.0665583	-10.57	4.10591e-26	4.86606e-25
GALNT4	140.308	-0.884807	0.0837118	-10.5697	4.11903e-26	4.87844e-25
CCDC191	975.534	0.615853	0.0582768	10.5677	4.20617e-26	4.9784e-25
MAPK10	2632.9	1.19734	0.113309	10.567	4.23701e-26	5.01164e-25
METTL9	380.546	-0.851671	0.0805977	-10.5669	4.24132e-26	5.01347e-25
CDKL5	1162.05	0.625072	0.0591782	10.5625	4.44454e-26	5.25027e-25
ERH	905.545	-1.42404	0.134844	-10.5606	4.53634e-26	5.35524e-25
AC091729.3	71.1838	-1.49235	0.141322	-10.5599	4.57157e-26	5.39332e-25
PSMC2	648.508	-0.622112	0.0589478	-10.5536	4.88882e-26	5.76387e-25
RTTN	827.858	0.742168	0.0703315	10.5524	4.95026e-26	5.83252e-25
LLPH	106.713	-1.0844	0.10278	-10.5507	5.03988e-26	5.93426e-25
PRELID3B	80.5047	-1.78028	0.168862	-10.5428	5.48345e-26	6.45237e-25
MAGI2	6829.19	0.752497	0.071395	10.5399	5.65516e-26	6.65011e-25
TFAM	210.06	-0.812627	0.077126	-10.5363	5.87345e-26	6.90235e-25
CCDC28B	224.31	-0.971445	0.0922053	-10.5357	5.91618e-26	6.94807e-25
HSD17B8	85.2421	-1.34538	0.127741	-10.5321	6.14516e-26	7.21233e-25
APPL2	727.345	0.510676	0.0485062	10.528	6.41529e-26	7.52452e-25
DOLK	32.1118	-1.40165	0.133138	-10.5278	6.43504e-26	7.54281e-25
CHD2	2993.13	0.646012	0.0613896	10.5231	6.75812e-26	7.91641e-25
DYNC1LI1	1239.18	-0.493617	0.0469084	-10.523	6.76943e-26	7.92455e-25
PSMD8	416.182	-1.3707	0.130315	-10.5184	7.10782e-26	8.31533e-25
MIR4458HG	174.317	-1.64599	0.15651	-10.5168	7.22741e-26	8.44436e-25
AC020661.3	120.197	-1.32625	0.126108	-10.5168	7.22715e-26	8.44436e-25
AL118556.1	31.7329	2.26271	0.215192	10.5149	7.37921e-26	8.61619e-25
MYO5B	3302.63	0.693512	0.0659586	10.5143	7.4194e-26	8.65755e-25
NAIF1	36.5751	-0.931288	0.0885912	-10.5122	7.59022e-26	8.8512e-25
ANP32E	1242.77	-1.00572	0.0956854	-10.5107	7.71276e-26	8.98833e-25
CD320	181.902	-1.10565	0.105198	-10.5102	7.75436e-26	9.03103e-25
AL591242.1	184.366	1.651	0.157125	10.5075	7.97599e-26	9.2832e-25
DNAJA4	239.275	-2.07662	0.197663	-10.5059	8.11744e-26	9.44178e-25
NSFL1C	415.299	-0.714732	0.0680351	-10.5053	8.16284e-26	9.48852e-25
FNDC4	74.6172	-1.32119	0.125829	-10.4999	8.6477e-26	1.00457e-24
RPL27	1388.1	-2.44437	0.232971	-10.4922	9.38149e-26	1.08912e-24
TRIM56	12.6829	-2.98944	0.284941	-10.4914	9.45667e-26	1.09714e-24
SUMO2	1087.11	-1.78779	0.170423	-10.4903	9.56996e-26	1.10958e-24
PPIB	332.728	-1.29427	0.123396	-10.4887	9.73296e-26	1.12776e-24
ZNF165	27.3148	-1.15434	0.11007	-10.4873	9.88026e-26	1.1441e-24
PAF1	106.975	-1.15993	0.11061	-10.4866	9.94963e-26	1.1514e-24
CDK2AP2	189.06	-1.43698	0.13704	-10.4859	1.00286e-25	1.1598e-24
RPS4X	2594.98	-2.65294	0.253176	-10.4786	1.08281e-25	1.25146e-24
SLC12A6	2336.29	0.498406	0.0475703	10.4773	1.09886e-25	1.2692e-24
RHOA	553.374	-0.72356	0.0690774	-10.4746	1.12995e-25	1.30429e-24
NT5C3B	186.668	-1.01271	0.0967211	-10.4704	1.18174e-25	1.3632e-24
VPS29	1617.95	-0.793487	0.0757893	-10.4696	1.19087e-25	1.37286e-24
SPATA5L1	151.319	-0.714546	0.0682722	-10.4661	1.23583e-25	1.42379e-24
BTRC	2445.02	0.550223	0.0526096	10.4586	1.33822e-25	1.54077e-24
TIMM29	128.63	-0.881083	0.084247	-10.4583	1.34212e-25	1.54429e-24
KRTCAP3	70.8357	1.00677	0.0962695	10.4578	1.34933e-25	1.5516e-24
RPL6	2510.64	-2.31648	0.221531	-10.4567	1.36559e-25	1.5693e-24
CLASP2	9448.81	0.553771	0.0529649	10.4554	1.38346e-25	1.58884e-24
METTL2A	160.313	-0.63936	0.0611538	-10.4549	1.39087e-25	1.59634e-24
UBAC2	985.723	0.445435	0.0426062	10.4547	1.39441e-25	1.5994e-24
N4BP2	537.344	0.722086	0.0690855	10.4521	1.43389e-25	1.64364e-24
ARHGAP10	7594.61	1.08912	0.104205	10.4517	1.43986e-25	1.64944e-24
PRPS1	97.9939	-1.42782	0.136619	-10.451	1.44918e-25	1.65908e-24
HEXIM1	141.263	-1.39734	0.133726	-10.4493	1.47651e-25	1.6893e-24
DLG1	3674.5	0.660522	0.0632177	10.4484	1.49075e-25	1.70452e-24
LRRC41	378.551	-0.528891	0.0506259	-10.4471	1.51151e-25	1.72716e-24
SF3B5	262.74	-1.87427	0.179474	-10.4432	1.57488e-25	1.79845e-24
TMEM167B	164.485	-1.11277	0.106601	-10.4386	1.65222e-25	1.88558e-24
RPL5	1563.39	-1.96068	0.187848	-10.4376	1.67011e-25	1.9048e-24
FRA10AC1	574.235	0.60681	0.0581396	10.4371	1.67841e-25	1.91307e-24
STAU2	1638.93	0.48848	0.0468035	10.4368	1.68328e-25	1.91741e-24
NSL1	819.974	0.361583	0.0346515	10.4349	1.71879e-25	1.95664e-24
AFG1L	514.087	0.689608	0.0661125	10.4308	1.79322e-25	2.0401e-24
LGMN	416.376	-1.20237	0.115272	-10.4307	1.79487e-25	2.0407e-24
RPL7L1	278.589	-1.04394	0.1001	-10.4289	1.82936e-25	2.07861e-24
LSM3	318.53	-1.73081	0.165965	-10.4287	1.83313e-25	2.08159e-24
DIDO1	613.792	0.479371	0.0459795	10.4258	1.89159e-25	2.14663e-24
FO393401.1	277.228	1.42613	0.136866	10.4199	2.01262e-25	2.28256e-24
RAB5A	596.912	-0.464505	0.0445817	-10.4192	2.02693e-25	2.29736e-24
TPGS2	219.144	-0.933269	0.0895869	-10.4175	2.06354e-25	2.33739e-24
ZNF718	558.459	0.702782	0.0674666	10.4167	2.07962e-25	2.35414e-24
ELOA	196.184	-0.56732	0.05449	-10.4115	2.19837e-25	2.48702e-24
RAN	654.168	-1.91675	0.184144	-10.4089	2.2571e-25	2.55187e-24
PREB	85.1551	-1.08332	0.104089	-10.4076	2.28828e-25	2.58552e-24
KIAA0319L	1442.82	0.581152	0.0558409	10.4073	2.29654e-25	2.59324e-24
RBM4	835.762	-0.546375	0.0525053	-10.4061	2.3256e-25	2.62442e-24
AL691432.2	155.833	-1.50948	0.145062	-10.4057	2.33505e-25	2.63345e-24
AC090115.1	145.965	1.22062	0.117308	10.4052	2.34659e-25	2.64482e-24
AC016747.1	71.01	-1.02044	0.0980755	-10.4047	2.36037e-25	2.65871e-24
GSTCD	1101.61	0.634406	0.0609736	10.4046	2.36235e-25	2.65929e-24
DUS3L	164.632	-1.00964	0.0970533	-10.4029	2.40488e-25	2.70549e-24
FBXW11	1520.37	0.492781	0.0473779	10.4011	2.45138e-25	2.7561e-24
AC231533.1	60.3552	1.09943	0.105718	10.3997	2.48837e-25	2.79596e-24
EBAG9	287.412	-0.908609	0.0873809	-10.3983	2.52497e-25	2.83532e-24
MGAT2	83.421	-1.53355	0.147493	-10.3975	2.5452e-25	2.85628e-24
MAN2A2	591.945	0.812828	0.078176	10.3974	2.54777e-25	2.8574e-24
TADA2A	685.48	0.645324	0.062087	10.3939	2.64398e-25	2.96348e-24
SAT1	487.159	-1.2642	0.121637	-10.3932	2.66218e-25	2.98203e-24
TMED1	70.1015	-1.38811	0.133595	-10.3905	2.74003e-25	3.06735e-24
HSP90AA1	16883.2	-1.60122	0.154132	-10.3886	2.79351e-25	3.12529e-24
TMEM219	303.253	-1.06139	0.10218	-10.3874	2.8284e-25	3.16238e-24
CLDN12	229.808	-0.831113	0.0800693	-10.3799	3.06035e-25	3.41962e-24
THRB	3241.64	0.624819	0.0602014	10.3788	3.09631e-25	3.45767e-24
EHBP1	1278.58	0.62756	0.0604749	10.3772	3.14905e-25	3.5144e-24
SPEF2	949.169	0.661655	0.0637801	10.374	3.2559e-25	3.63143e-24
TMEM69	151.145	-1.19804	0.11552	-10.3708	3.36592e-25	3.75183e-24
UROD	106.923	-1.1977	0.115496	-10.3701	3.39168e-25	3.77823e-24
RERE	7839.94	0.66204	0.0638591	10.3672	3.49609e-25	3.89216e-24
SLC39A3	105.785	-1.34995	0.130281	-10.3618	3.69848e-25	4.11496e-24
TWF1	205.609	-0.911837	0.0880026	-10.3615	3.71198e-25	4.12745e-24
CAND1	967.715	-0.346012	0.0333972	-10.3605	3.74937e-25	4.16647e-24
PAFAH1B3	171.23	-1.47641	0.142507	-10.3603	3.75816e-25	4.17369e-24
HEIH	227.616	-1.54383	0.149016	-10.3602	3.76231e-25	4.17575e-24
AL136984.1	25.2222	1.96006	0.189217	10.3588	3.81658e-25	4.2334e-24
PHF12	432.106	0.443176	0.0427873	10.3576	3.86372e-25	4.28307e-24
TMEM19	81.3799	-0.944563	0.0912136	-10.3555	3.95092e-25	4.37707e-24
RRP1	78.0921	-0.838861	0.0810204	-10.3537	4.02596e-25	4.45749e-24
TMEM242	303.752	-0.726286	0.0701566	-10.3524	4.08307e-25	4.51797e-24
CSPP1	3047.88	0.709223	0.0685257	10.3497	4.19624e-25	4.64037e-24
WDR34	138.936	-0.772507	0.0746411	-10.3496	4.20112e-25	4.64294e-24
RPAIN	447.369	-0.672718	0.0650083	-10.3482	4.26528e-25	4.71098e-24
MRPL11	98.8929	-1.4904	0.144068	-10.3451	4.40256e-25	4.85938e-24
RSPH1	288.084	-0.63285	0.0611739	-10.3451	4.40498e-25	4.85938e-24
HTATSF1	295.116	-1.29634	0.125326	-10.3438	4.46492e-25	4.92252e-24
C2CD5	1858.28	0.745893	0.0721194	10.3425	4.5272e-25	4.98815e-24
POLR3K	65.5052	-1.52032	0.147059	-10.3381	4.73697e-25	5.21612e-24
ANP32B	271.636	-0.95769	0.0926612	-10.3354	4.87374e-25	5.36348e-24
CCDC184	49.5119	-1.90673	0.184521	-10.3334	4.97512e-25	5.47173e-24
CHCHD4	43.3242	-1.7519	0.169559	-10.3321	5.04475e-25	5.54495e-24
KCTD1	667.369	0.58639	0.0567583	10.3313	5.08422e-25	5.58496e-24
EFCAB11	689.888	0.652908	0.0632057	10.3299	5.16255e-25	5.66759e-24
DACT3-AS1	23.3643	-2.041	0.197587	-10.3296	5.17561e-25	5.6785e-24
HAT1	530.928	-0.514484	0.0498181	-10.3273	5.30561e-25	5.81761e-24
NCOA6	1614.02	0.489206	0.0473792	10.3253	5.41314e-25	5.93194e-24
OSTM1	310.776	-0.641849	0.0621767	-10.323	5.54694e-25	6.0749e-24
AC007566.1	348.997	1.11544	0.108083	10.3203	5.70651e-25	6.24589e-24
ABCA4	19507	0.601905	0.0583817	10.3098	6.36075e-25	6.95779e-24
DMXL2	1015.41	0.585324	0.0567741	10.3097	6.36992e-25	6.96363e-24
LZIC	363.263	-0.520151	0.0504557	-10.3091	6.41204e-25	7.00546e-24
EML5	2325.81	0.718868	0.0697375	10.3082	6.47053e-25	7.06512e-24
IDH3G	239.489	-1.33544	0.129578	-10.3061	6.61361e-25	7.21702e-24
UTP11	116.342	-0.929338	0.0901826	-10.3051	6.68429e-25	7.28976e-24
ATP6V1G1	897.588	-1.76441	0.171259	-10.3026	6.85921e-25	7.47605e-24
GABARAP	644.874	-1.90229	0.184696	-10.2996	7.07618e-25	7.7079e-24
AL161757.4	8555.76	0.936676	0.0909505	10.2988	7.13822e-25	7.77083e-24
ATP6V1B2	1136.21	-0.983919	0.0955412	-10.2984	7.16566e-25	7.79603e-24
THSD1	193.749	0.91219	0.0886076	10.2947	7.44394e-25	8.09395e-24
PMF1	377.045	-0.609908	0.059247	-10.2943	7.47374e-25	8.1215e-24
TOE1	85.8684	-1.15753	0.112465	-10.2923	7.63067e-25	8.28707e-24
PAPPA2	78.5243	1.29107	0.125479	10.2891	7.89009e-25	8.56369e-24
TMEM232	2384.66	0.742095	0.0721252	10.289	7.90003e-25	8.56936e-24
MBD2	437.339	0.694047	0.0674578	10.2886	7.93068e-25	8.59749e-24
KBTBD7	120.716	-1.19057	0.115734	-10.2871	8.05258e-25	8.72443e-24
SLX4IP	1006.49	0.643408	0.0625474	10.2867	8.08826e-25	8.75786e-24
RIMS2	47967.9	0.714099	0.0694364	10.2842	8.3019e-25	8.98384e-24
SELENOT	634.191	-1.19077	0.115794	-10.2835	8.36273e-25	9.04429e-24
MELTF-AS1	55.8651	1.49778	0.145677	10.2815	8.53829e-25	9.22867e-24
AC012640.1	44.7327	-1.61191	0.156781	-10.2813	8.55862e-25	9.24514e-24
AP003392.1	87.7918	1.34514	0.130843	10.2806	8.61572e-25	9.30129e-24
SNRPA	94.3821	-1.00777	0.0980276	-10.2805	8.63172e-25	9.31303e-24
GANAB	314.14	0.611042	0.0594434	10.2794	8.7286e-25	9.41198e-24
MCPH1-AS1	215.099	0.770137	0.0749278	10.2784	8.81827e-25	9.50303e-24
ILVBL	203.93	-0.96748	0.0941459	-10.2764	9.00385e-25	9.69728e-24
PARP4	325.887	0.612886	0.0596476	10.2751	9.12366e-25	9.8205e-24
FCHSD2	2727.86	0.548514	0.0533842	10.2749	9.14863e-25	9.84154e-24
PPP3CB	1339.11	0.520181	0.0506334	10.2735	9.28178e-25	9.97887e-24
SPTLC2	751.448	0.576983	0.056176	10.271	9.5231e-25	1.02323e-23
SLC25A4	849.15	-1.5139	0.147398	-10.2708	9.53654e-25	1.02407e-23
SPON1-AS1	56.1495	1.23766	0.120544	10.2673	9.89305e-25	1.06172e-23
TATDN2	74.6766	0.755047	0.0735409	10.267	9.9215e-25	1.06415e-23
SBF2	6241.53	0.615852	0.0599865	10.2665	9.97548e-25	1.06931e-23
EMC7	397.014	-1.4806	0.144219	-10.2664	9.99048e-25	1.07028e-23
HLTF	920.07	0.554338	0.0540013	10.2653	1.01027e-24	1.08167e-23
PPP4R1	498.03	0.817304	0.079625	10.2644	1.01949e-24	1.0909e-23
GHITM	755.202	-1.82967	0.178293	-10.2622	1.04303e-24	1.11542e-23
RNPC3	1930.21	0.784383	0.0764481	10.2603	1.06342e-24	1.13656e-23
PRMT9	387.735	-0.824645	0.0804072	-10.2559	1.1139e-24	1.18982e-23
UBL5	1024.51	-2.09092	0.203898	-10.2548	1.12632e-24	1.20237e-23
RNF7	300.857	-1.41921	0.138457	-10.2502	1.18083e-24	1.25983e-23
PLA2G12A	462.821	-0.505408	0.0493083	-10.2499	1.18415e-24	1.26263e-23
C16orf91	122.632	-1.18071	0.115197	-10.2495	1.18981e-24	1.26792e-23
CAMK2D	7628.11	0.590415	0.0576396	10.2432	1.26941e-24	1.35196e-23
POLR2E	286.35	-0.857306	0.0837102	-10.2414	1.29411e-24	1.37746e-23
THSD7B	17569.2	0.853942	0.0833824	10.2413	1.2952e-24	1.3778e-23
PANK3	347.054	0.844229	0.0824541	10.2388	1.32902e-24	1.41296e-23
AP005436.2	46.0815	2.32027	0.226631	10.2381	1.33865e-24	1.42236e-23
SDHA	782.806	-0.567352	0.0554193	-10.2375	1.34735e-24	1.43078e-23
HIST2H2BF	16.6462	-2.38058	0.232646	-10.2326	1.41619e-24	1.503e-23
NCBP2	330.032	-0.914837	0.0894074	-10.2322	1.42212e-24	1.50841e-23
AP000708.1	9.56867	-2.22313	0.217272	-10.232	1.42546e-24	1.51108e-23
GUCA1B	5280.4	-0.941387	0.0920429	-10.2277	1.49028e-24	1.57887e-23
WDR83	188.534	-0.753264	0.0736717	-10.2246	1.53848e-24	1.62898e-23
MORN2	229.597	-1.2017	0.117541	-10.2236	1.55421e-24	1.64467e-23
AC126696.2	49.8859	-1.84185	0.180226	-10.2197	1.61895e-24	1.71219e-23
TUFM	556.129	-1.36811	0.133904	-10.2171	1.66193e-24	1.75662e-23
COX5B	1509.1	-1.95284	0.191153	-10.2161	1.67941e-24	1.77406e-23
FBXL3	324.798	-0.848762	0.0830823	-10.2159	1.68277e-24	1.77659e-23
RPS7	3780.44	-2.30157	0.225298	-10.2157	1.68718e-24	1.77917e-23
SCAMP1-AS1	89.0931	-1.24019	0.121401	-10.2157	1.68713e-24	1.77917e-23
EBNA1BP2	156.601	-1.31188	0.128422	-10.2154	1.6914e-24	1.78259e-23
PLPBP	180.476	-0.777108	0.076112	-10.2101	1.78743e-24	1.88271e-23
CTNND1	875.328	0.61988	0.0607148	10.2097	1.79393e-24	1.88846e-23
TUG1	531.495	0.905208	0.0886718	10.2085	1.81598e-24	1.91056e-23
POLR3GL	179.51	-0.91251	0.0893973	-10.2074	1.83806e-24	1.93267e-23
MCM3AP	330.169	0.68766	0.0673841	10.2051	1.88163e-24	1.97735e-23
CTSL	260.427	-1.10959	0.108739	-10.2041	1.90056e-24	1.99608e-23
ZCCHC7	4306.39	0.584123	0.0572539	10.2023	1.93605e-24	2.03218e-23
TBCA	1427.17	-0.796028	0.0780322	-10.2013	1.95687e-24	2.05167e-23
BCLAF3	317.463	0.690777	0.0677144	10.2013	1.95577e-24	2.05167e-23
RMDN3	263.469	-0.710632	0.0696825	-10.1981	2.02116e-24	2.11785e-23
LSM1	160.845	-1.66112	0.162943	-10.1945	2.0982e-24	2.19731e-23
TMEM74	85.6678	-1.56796	0.15381	-10.1941	2.10616e-24	2.20438e-23
DIP2C	1774.09	0.839838	0.0823996	10.1923	2.14703e-24	2.24586e-23
PHRF1	200.854	0.70921	0.0695889	10.1914	2.16548e-24	2.26385e-23
AC008264.2	209.31	1.54028	0.151152	10.1903	2.19135e-24	2.28958e-23
ZNF33A	990.177	0.426502	0.0418554	10.1899	2.19983e-24	2.29713e-23
FAM104B	132.276	-1.22546	0.120295	-10.1871	2.26424e-24	2.36302e-23
DGKG	26.3523	-2.86676	0.281419	-10.1868	2.27161e-24	2.36936e-23
HIPK2	2302.94	0.554959	0.0544827	10.186	2.29073e-24	2.38793e-23
RBL2	854.655	0.472381	0.0463814	10.1847	2.32052e-24	2.41759e-23
UBXN11	578.024	-0.74004	0.0726666	-10.1841	2.33623e-24	2.43257e-23
AKR1B1	193.993	-1.01982	0.100163	-10.1816	2.39591e-24	2.49328e-23
CEP350	1820.5	0.517913	0.0508683	10.1815	2.39945e-24	2.49554e-23
TPRKB	208	-1.02362	0.100556	-10.1796	2.44641e-24	2.54293e-23
ZNF92	78.0314	-0.834731	0.0820058	-10.1789	2.46269e-24	2.55838e-23
SRCAP	251.707	0.670679	0.0658959	10.1779	2.48995e-24	2.58523e-23
METTL15	1101.68	0.688457	0.0676474	10.1771	2.50848e-24	2.60298e-23
PSMB6	357.863	-1.80759	0.177635	-10.1759	2.54056e-24	2.63476e-23
AL161457.2	38.4209	-1.28329	0.126116	-10.1755	2.55212e-24	2.64524e-23
CRBN	649.43	-0.505809	0.0497126	-10.1747	2.57302e-24	2.66235e-23
USP49	520.03	0.484805	0.047648	10.1747	2.57116e-24	2.66235e-23
SLC30A4	99.6755	-0.867345	0.0852453	-10.1747	2.57215e-24	2.66235e-23
IDH3B	219.099	-1.09803	0.107922	-10.1742	2.58426e-24	2.67246e-23
PARL	662.617	-0.464172	0.0456426	-10.1697	2.70701e-24	2.7978e-23
CCDC171	1644.09	0.859959	0.0845653	10.1692	2.72232e-24	2.81203e-23
ZBTB40	511.444	0.610624	0.0600479	10.1689	2.7285e-24	2.81682e-23
AC136604.2	219.473	-1.47446	0.145011	-10.1679	2.75735e-24	2.84337e-23
ADAM10	956.945	0.60097	0.0591043	10.168	2.75641e-24	2.84337e-23
HIST1H2BN	139.751	-1.51361	0.148876	-10.1669	2.78547e-24	2.87074e-23
C3orf35	660.724	1.10911	0.109137	10.1625	2.91473e-24	3.00225e-23
FYTTD1	477.014	-0.654138	0.0643911	-10.1588	3.02695e-24	3.11608e-23
FKBP7	78.4979	-1.24257	0.122326	-10.1579	3.057e-24	3.14523e-23
TIAM2	622.191	0.977402	0.0962328	10.1566	3.09579e-24	3.18334e-23
DDX39A	46.8963	-1.2244	0.120577	-10.1545	3.16587e-24	3.25357e-23
COMMD8	176.13	-1.6621	0.163693	-10.1538	3.18758e-24	3.27402e-23
DLG3	161.83	0.734587	0.0723559	10.1524	3.23303e-24	3.31883e-23
TCF4-AS2	40.3527	2.33855	0.230367	10.1514	3.26647e-24	3.35127e-23
ZNF221	45.8258	1.19219	0.117463	10.1495	3.33148e-24	3.41603e-23
UBAP2L	363.696	0.452844	0.0446192	10.1491	3.34536e-24	3.42834e-23
ZNF823	85.4216	-1.08954	0.107359	-10.1485	3.36432e-24	3.44582e-23
SEMA3F-AS1	1377.27	1.15757	0.114065	10.1483	3.37127e-24	3.451e-23
EPC2	742.474	0.803417	0.0791771	10.1471	3.41409e-24	3.49287e-23
ZNF747	45.2867	-1.23323	0.121552	-10.1457	3.46417e-24	3.5421e-23
DSTN	903.225	-1.62105	0.159785	-10.1452	3.4796e-24	3.55588e-23
VAPB	638.667	0.523575	0.0516099	10.1449	3.49286e-24	3.56742e-23
DNAL1	454.192	-0.418822	0.0412863	-10.1443	3.51171e-24	3.58467e-23
PNRC2	292.275	-1.59116	0.156868	-10.1433	3.55001e-24	3.62173e-23
RUFY3	4649.02	0.371412	0.0366196	10.1424	3.58092e-24	3.65122e-23
RBX1	1183.02	-0.922058	0.090914	-10.1421	3.593e-24	3.66148e-23
RRP9	71.7675	-1.1166	0.110117	-10.1401	3.66881e-24	3.73663e-23
SLF2	716.409	0.634819	0.0626244	10.1369	3.78796e-24	3.85583e-23
AC069272.1	202.183	1.39394	0.137518	10.1364	3.80837e-24	3.87444e-23
C9orf16	305.407	-1.63576	0.161384	-10.1358	3.83299e-24	3.8973e-23
NOP10	163.646	-2.23349	0.220377	-10.1348	3.8704e-24	3.93314e-23
EWSR1	863.41	-0.562718	0.0555343	-10.1328	3.9514e-24	4.01321e-23
PSMG3	117.256	-1.47928	0.146013	-10.1312	4.01848e-24	4.07906e-23
TMEM265	76.9664	0.994974	0.0982163	10.1304	4.04822e-24	4.10696e-23
FCHO2	541.847	0.864894	0.0853975	10.1279	4.15673e-24	4.21469e-23
C1orf109	81.1577	-0.769367	0.075985	-10.1252	4.26902e-24	4.32613e-23
RPL11	3994.71	-2.16521	0.213847	-10.125	4.27889e-24	4.33372e-23
LINC01266	535.1	1.0291	0.101663	10.1226	4.38487e-24	4.43858e-23
VWA8	8546.21	0.747279	0.0738281	10.1219	4.41889e-24	4.47053e-23
MRPL43	321.647	-1.08541	0.107242	-10.1211	4.45297e-24	4.50188e-23
SLC35B1	199.998	-0.818854	0.0809058	-10.1211	4.45483e-24	4.50188e-23
SGK1	216.293	-1.43841	0.142131	-10.1203	4.48975e-24	4.53465e-23
MAP3K2	1633.41	0.650458	0.0642787	10.1193	4.53507e-24	4.57788e-23
CLK1	944.57	-0.980435	0.0968953	-10.1185	4.5738e-24	4.61441e-23
CAPN3	144.172	0.79184	0.0782627	10.1177	4.61009e-24	4.64844e-23
TBCK	1476.77	0.700422	0.0692583	10.1132	4.82876e-24	4.86623e-23
ZNF879	59.8774	-0.794018	0.078536	-10.1102	4.97601e-24	5.01185e-23
AADAT	144.066	0.792117	0.0783664	10.1079	5.09845e-24	5.13233e-23
ORAI2	159.323	-0.757968	0.0749893	-10.1077	5.10752e-24	5.13861e-23
PARP1	687.889	-0.993645	0.0983284	-10.1054	5.22963e-24	5.25856e-23
GPHN	10162.4	0.575996	0.057014	10.1027	5.37362e-24	5.40036e-23
TRAPPC12	1056.65	0.427115	0.0422785	10.1024	5.38948e-24	5.41031e-23
RSL24D1	473.982	-1.59656	0.158036	-10.1025	5.3868e-24	5.41031e-23
NBEA	5458.9	0.711477	0.0704292	10.102	5.41217e-24	5.43009e-23
GALM	170.925	-1.54966	0.153407	-10.1017	5.4313e-24	5.44628e-23
FUNDC2	323.047	-1.18438	0.117258	-10.1007	5.48702e-24	5.49912e-23
LETM2	66.8498	-0.857053	0.0848527	-10.1005	5.49723e-24	5.50631e-23
RAX2	1636.21	-1.11295	0.110196	-10.0998	5.5366e-24	5.54269e-23
IDI1	438.941	-1.40519	0.139171	-10.0969	5.7027e-24	5.70584e-23
ZMYM1	264.724	0.567752	0.0562331	10.0964	5.73037e-24	5.72813e-23
ARID2	2337.54	0.501012	0.0496229	10.0964	5.73128e-24	5.72813e-23
HIST1H2BD	286.665	-3.10684	0.307762	-10.095	5.81515e-24	5.80876e-23
AGO2	573.709	0.48558	0.0481205	10.0909	6.06071e-24	6.05072e-23
TMEM161B-AS1	1927.35	0.799857	0.0792702	10.0903	6.10026e-24	6.08687e-23
SUMO3	317.728	-1.91719	0.190109	-10.0847	6.45727e-24	6.43956e-23
SRP72	372.14	-0.600501	0.0595752	-10.0797	6.79218e-24	6.76984e-23
ASB8	928.215	-0.705278	0.0699721	-10.0794	6.81264e-24	6.78651e-23
NARS	535.104	-0.94314	0.0935772	-10.0787	6.86021e-24	6.83016e-23
C2orf50	74.3681	-1.07792	0.107015	-10.0726	7.30183e-24	7.26586e-23
TAOK1	1430.54	0.528333	0.05246	10.0712	7.40918e-24	7.36865e-23
TTC28	3097.1	0.623431	0.0619143	10.0693	7.55504e-24	7.5096e-23
EIF3A	570.769	-0.512874	0.0509465	-10.0669	7.73709e-24	7.68635e-23
FAM49B	1097.54	0.544075	0.0540483	10.0665	7.77131e-24	7.71614e-23
CCT5	355.76	-1.33378	0.132509	-10.0656	7.84143e-24	7.7815e-23
RPL21	6002.06	-2.7178	0.270019	-10.0652	7.87351e-24	7.80908e-23
HNRNPA1	1036.59	-1.94754	0.19355	-10.0622	8.1132e-24	8.04242e-23
C11orf80	1388.12	0.687219	0.0682977	10.0621	8.12296e-24	8.04771e-23
FEN1	113.639	-1.43731	0.142865	-10.0606	8.24702e-24	8.16617e-23
KAT2B	1252.52	0.643896	0.0640041	10.0602	8.28035e-24	8.1947e-23
ARPC5L	196.179	-1.06298	0.10567	-10.0595	8.3458e-24	8.25499e-23
ZNF691	60.1178	-1.00797	0.100214	-10.0581	8.45758e-24	8.35832e-23
RHBDD3	282.636	-0.668886	0.0665021	-10.0581	8.45946e-24	8.35832e-23
PIAS2	600.638	0.652856	0.064914	10.0573	8.53434e-24	8.42771e-23
MPP7	1040.07	0.63017	0.0626815	10.0535	8.86432e-24	8.74882e-23
AL117335.1	501.872	1.12075	0.11149	10.0525	8.95872e-24	8.8372e-23
RPS29	2687.86	-2.31249	0.230083	-10.0507	9.12517e-24	8.99651e-23
AP000704.1	43.1288	-0.91193	0.0907346	-10.0505	9.13768e-24	9.00396e-23
PSPC1	2775.63	0.728966	0.0725387	10.0493	9.24826e-24	9.10798e-23
MIATNB	193.703	0.794133	0.0790316	10.0483	9.34646e-24	9.19971e-23
HS2ST1	2359.02	0.505116	0.0502719	10.0477	9.4046e-24	9.25193e-23
FAM161B	230.918	-0.966542	0.096196	-10.0476	9.40992e-24	9.25215e-23
AC139887.2	693.31	0.801626	0.0797904	10.0466	9.50512e-24	9.34071e-23
YBX3	2450.14	-1.04283	0.103827	-10.044	9.76656e-24	9.59244e-23
AL160313.1	387.12	1.27562	0.127029	10.042	9.96208e-24	9.77919e-23
DENND4B	254.788	0.99808	0.099404	10.0406	1.01015e-23	9.91074e-23
RIDA	131.018	-0.991274	0.0987455	-10.0387	1.03045e-23	1.01044e-22
AC009686.2	47.0233	-1.60456	0.159882	-10.0359	1.05952e-23	1.03839e-22
PYM1	160.177	-0.880768	0.0877679	-10.0352	1.06751e-23	1.04565e-22
PROM1	10899.1	0.601906	0.0599849	10.0343	1.0773e-23	1.05467e-22
YLPM1	808.249	0.574781	0.0572821	10.0342	1.07813e-23	1.05492e-22
THAP7	132.701	-1.37593	0.137126	-10.034	1.08007e-23	1.05625e-22
AC108159.1	71.1544	1.57087	0.156572	10.0329	1.09263e-23	1.06796e-22
KPNA1	1722.56	0.377759	0.0376661	10.0292	1.13486e-23	1.10864e-22
AC138123.1	21.1777	-2.02062	0.201482	-10.0288	1.13891e-23	1.112e-22
DTWD2	363.228	0.678146	0.067623	10.0283	1.14433e-23	1.11669e-22
SLU7	347.236	-0.856144	0.0853773	-10.0278	1.15083e-23	1.12243e-22
COMMD5	71.3842	-0.922169	0.0919707	-10.0268	1.16259e-23	1.13329e-22
ZNF668	28.6351	-1.06708	0.106441	-10.0251	1.18258e-23	1.15216e-22
GPATCH11	618.665	-0.798639	0.0796759	-10.0236	1.20048e-23	1.16897e-22
C12orf43	76.4919	-1.18843	0.118582	-10.0219	1.22073e-23	1.18805e-22
C19orf48	61.5041	-1.17485	0.11723	-10.0217	1.22358e-23	1.19019e-22
TOMM5	267.804	-1.72683	0.172315	-10.0213	1.22842e-23	1.19426e-22
CENPN	12.8483	-1.86576	0.186208	-10.0198	1.24818e-23	1.21282e-22
AFAP1L1	698.959	0.979399	0.0977702	10.0173	1.27889e-23	1.242e-22
NDUFB2	997.23	-1.79211	0.179011	-10.0112	1.36127e-23	1.32129e-22
TCEA1	957.429	-0.562086	0.0561668	-10.0074	1.41356e-23	1.37132e-22
LRRC6	735.224	0.538402	0.0538106	10.0055	1.44155e-23	1.39772e-22
AC118555.1	66.2649	1.96466	0.196405	10.0031	1.47663e-23	1.43098e-22
TERF2IP	1802.89	-0.970383	0.0970586	-9.99791	1.55655e-23	1.50624e-22
MIEN1	86.885	-1.81632	0.18167	-9.99789	1.55678e-23	1.50624e-22
EIF3G	272.478	-1.61943	0.161976	-9.99796	1.55565e-23	1.50624e-22
ABHD10	287.099	-0.717134	0.0717316	-9.99745	1.56365e-23	1.51208e-22
KDF1	33.2416	-0.945439	0.0946132	-9.99268	1.64083e-23	1.58587e-22
CDK8	1477.34	0.555955	0.0556391	9.99217	1.64934e-23	1.59325e-22
TBC1D22A	1579.9	0.647793	0.0648546	9.98839	1.71343e-23	1.65429e-22
GLS	2781.66	0.808267	0.0809346	9.98666	1.74351e-23	1.68243e-22
AP1M1	217.183	-0.589849	0.0590717	-9.98531	1.76751e-23	1.70468e-22
NFKBIB	77.1489	-0.830978	0.0832486	-9.98188	1.82972e-23	1.76375e-22
PGLS	158.479	-0.98516	0.0987408	-9.97723	1.91743e-23	1.84732e-22
ACP1	446.339	-1.02743	0.10298	-9.97694	1.92304e-23	1.85174e-22
AC009506.1	143.967	-1.69409	0.169817	-9.97598	1.94178e-23	1.8688e-22
ELOF1	133.421	-1.38304	0.138639	-9.97583	1.94464e-23	1.87056e-22
PELO	79.9362	-1.50739	0.151129	-9.97422	1.97642e-23	1.90012e-22
EML1	4076.07	0.66261	0.0664331	9.9741	1.97894e-23	1.90154e-22
AC025034.1	173.513	1.40625	0.141045	9.97022	2.05765e-23	1.97613e-22
NGRN	725.727	-1.85326	0.185913	-9.96841	2.09556e-23	2.01147e-22
FAM217B	150.239	-0.836818	0.0839513	-9.9679	2.1064e-23	2.02081e-22
POLR2M	64.2598	-1.30821	0.131274	-9.96543	2.15928e-23	2.07045e-22
ZNF891	294.055	0.827489	0.0830413	9.96479	2.1733e-23	2.08213e-22
ZNF576	116.758	-0.772349	0.077508	-9.96477	2.17375e-23	2.08213e-22
CCDC66	1978.43	0.501191	0.0502985	9.96433	2.18348e-23	2.09034e-22
SBDS	367.24	-1.53807	0.154367	-9.96373	2.19671e-23	2.10191e-22
MIR3936HG	1084.66	0.746721	0.0749512	9.96275	2.21835e-23	2.1215e-22
ARHGAP21	909.938	0.523271	0.0525334	9.96073	2.26402e-23	2.16397e-22
KATNBL1	1408.55	0.410282	0.0411902	9.96068	2.26515e-23	2.16397e-22
ZNF77	85.6259	-0.876055	0.0879839	-9.95699	2.3506e-23	2.24443e-22
RPL32	3768.76	-2.60441	0.261635	-9.95436	2.41374e-23	2.30351e-22
KIAA0753	414.566	0.750257	0.0754001	9.95034	2.51313e-23	2.39709e-22
WDR33	1440.49	0.430924	0.0433309	9.94496	2.6529e-23	2.52909e-22
U47924.2	12.6994	-1.58481	0.159365	-9.94453	2.66432e-23	2.53864e-22
FTO	3486.53	0.631013	0.0634591	9.94362	2.68885e-23	2.56067e-22
ALDOC	3453.07	-1.9939	0.200542	-9.94259	2.7167e-23	2.58584e-22
SDHAF1	89.8617	-1.47129	0.147995	-9.94143	2.74851e-23	2.61475e-22
FRYL	5276.62	0.457938	0.0460662	9.94087	2.76409e-23	2.6282e-22
DOHH	75.8249	-1.10225	0.110885	-9.94042	2.7765e-23	2.63862e-22
NRBP2	64.7702	1.31062	0.131881	9.93785	2.84917e-23	2.70627e-22
MTDH	2902.98	-0.370424	0.037278	-9.93679	2.87959e-23	2.73373e-22
SCAND1	434.496	-1.81978	0.18316	-9.9355	2.91714e-23	2.76794e-22
CASC2	881.102	0.724236	0.0728978	9.93495	2.93329e-23	2.78181e-22
ARAF	199.45	-0.952529	0.0958821	-9.93438	2.9501e-23	2.79629e-22
CFL2	360.096	-1.19794	0.120598	-9.93336	2.98049e-23	2.82362e-22
SDF2	229.601	-0.995885	0.100287	-9.93034	3.07206e-23	2.90886e-22
AFF1	9252.83	0.559239	0.0563378	9.92654	3.19151e-23	3.02039e-22
AGBL4	11410.4	0.790363	0.0796256	9.92599	3.20894e-23	3.03531e-22
CEP70	1104.43	0.538871	0.0542972	9.92448	3.2581e-23	3.0802e-22
CALR	492.181	-1.37937	0.139036	-9.92097	3.37461e-23	3.18869e-22
TMEM260	594.49	0.608635	0.0613623	9.91872	3.45152e-23	3.25967e-22
PI4KB	378.825	-0.54815	0.0552666	-9.9183	3.46626e-23	3.27189e-22
AC110285.2	345.125	1.47136	0.14837	9.91683	3.51754e-23	3.31857e-22
FAN1	447.666	0.573383	0.0578398	9.91329	3.6444e-23	3.43647e-22
CCDC121	90.2818	-1.42458	0.143711	-9.91282	3.66146e-23	3.45077e-22
PSMA4	274.935	-1.58501	0.159901	-9.91245	3.67516e-23	3.46188e-22
P4HTM	413.188	-0.731247	0.0737728	-9.91214	3.68659e-23	3.47086e-22
MAP4K5	1157.87	0.569727	0.0574957	9.90903	3.80312e-23	3.57872e-22
PBDC1	175.111	-1.54012	0.155442	-9.90799	3.84284e-23	3.61422e-22
CAMSAP1	4949.83	0.629672	0.0635806	9.90353	4.01829e-23	3.77728e-22
TSSC4	145.911	-1.46998	0.148437	-9.90306	4.03717e-23	3.79306e-22
KIF5B	1245.44	-0.507573	0.0512596	-9.902	4.08043e-23	3.83173e-22
SLC38A6	592.274	0.595058	0.0600999	9.90113	4.11588e-23	3.86302e-22
APTR	603.112	-0.685874	0.0692754	-9.90069	4.13403e-23	3.87805e-22
TDRD3	832.701	0.495704	0.0500832	9.89762	4.26309e-23	3.99706e-22
CYCS	887.782	-1.92382	0.194409	-9.89577	4.34264e-23	4.06954e-22
MRPS2	79.8518	-1.45689	0.147283	-9.89178	4.51919e-23	4.23281e-22
BCCIP	497.617	-0.526368	0.0532215	-9.89013	4.5943e-23	4.30094e-22
RPN2	744.411	-0.785097	0.0793837	-9.88991	4.60454e-23	4.30831e-22
FAM210B	142.027	-1.38583	0.140131	-9.8895	4.6232e-23	4.32355e-22
RAB11B	311.354	-1.22913	0.124289	-9.8893	4.63256e-23	4.33008e-22
RREB1	1090.44	0.745111	0.0753634	9.88691	4.74468e-23	4.43259e-22
TMEM258	325.893	-1.56077	0.157884	-9.88549	4.81208e-23	4.49325e-22
NEMF	1388.51	0.401343	0.0406217	9.88	5.08319e-23	4.74396e-22
ZNF587	266.647	0.700704	0.0709218	9.87995	5.08589e-23	4.74405e-22
TMEM147	310.029	-1.77485	0.179664	-9.87868	5.15077e-23	4.8021e-22
C1QBP	426.113	-1.70564	0.172668	-9.87813	5.1788e-23	4.82576e-22
DENND3	20.4899	1.97107	0.199558	9.87714	5.23063e-23	4.87156e-22
POLD2	328.194	-0.673536	0.0681987	-9.87608	5.28615e-23	4.92075e-22
NFASC	4576.98	0.960033	0.0972096	9.87591	5.29516e-23	4.92661e-22
TMEM178A	129.195	1.27146	0.128748	9.87558	5.31271e-23	4.94041e-22
VKORC1	340.097	-1.00022	0.101296	-9.87425	5.38326e-23	5.00346e-22
IFT74	993.747	0.476294	0.048243	9.87281	5.46148e-23	5.07356e-22
POLE4	1323.41	-1.0481	0.106162	-9.87265	5.47013e-23	5.079e-22
ID1	62.8439	-3.32356	0.336764	-9.86912	5.66596e-23	5.25815e-22
SSUH2	3.39835	-1.96641	0.199284	-9.86736	5.76642e-23	5.34865e-22
NPRL2	157.532	-0.870286	0.088205	-9.86662	5.80876e-23	5.38517e-22
KDM1A	492.58	0.660185	0.0669266	9.86431	5.94402e-23	5.50776e-22
GADD45GIP1	435.323	-1.94427	0.197242	-9.85728	6.3754e-23	5.90447e-22
ZNF473	141.011	-0.995569	0.101016	-9.85556	6.48522e-23	6.00312e-22
ARHGAP26	5234.34	0.730561	0.0741375	9.85414	6.57764e-23	6.08557e-22
MRPS21	425.305	-1.05131	0.106709	-9.85221	6.70558e-23	6.20079e-22
RPL22L1	100.538	-1.84226	0.187036	-9.84978	6.86912e-23	6.34878e-22
LAMTOR2	161.471	-1.81808	0.184601	-9.84868	6.94496e-23	6.41561e-22
BLOC1S4	146.787	-1.43542	0.145777	-9.84667	7.08538e-23	6.54201e-22
LAPTM4A	189.41	-1.07102	0.108771	-9.84661	7.08951e-23	6.5425e-22
NCOA4	250.628	-0.984593	0.10003	-9.84298	7.34974e-23	6.77921e-22
XAB2	152.095	-0.960025	0.0975555	-9.8408	7.51083e-23	6.92429e-22
KNTC1	134.321	0.780759	0.0793618	9.83796	7.726e-23	7.11544e-22
CGRRF1	215.263	-0.869317	0.0883635	-9.83797	7.72512e-23	7.11544e-22
MAGIX	46.5412	-1.0058	0.102269	-9.8348	7.97271e-23	7.33893e-22
EGLN2	92.5518	-1.06311	0.108115	-9.8331	8.10839e-23	7.46005e-22
RPS6KC1	1217.98	0.521193	0.0530072	9.8325	8.15689e-23	7.50088e-22
TMED3	102.595	-1.2468	0.12682	-9.83118	8.26445e-23	7.59594e-22
PCCA	3717.22	0.686984	0.0698929	9.8291	8.43705e-23	7.75066e-22
ZNF674	178.17	0.757559	0.077081	9.82809	8.52183e-23	7.82459e-22
ADCY1	5377.22	0.804853	0.0818952	9.82784	8.54301e-23	7.84008e-22
SELENOK	1972.54	-1.88593	0.191907	-9.82733	8.58661e-23	7.87611e-22
AC011379.1	18.0952	-1.32593	0.134943	-9.82586	8.7125e-23	7.98755e-22
COG5	1882.87	0.467015	0.0475406	9.82349	8.91999e-23	8.17366e-22
TRAPPC4	312.9	-1.12925	0.114967	-9.82242	9.01492e-23	8.25648e-22
METTL23	212.347	-0.741091	0.0754622	-9.82069	9.17121e-23	8.3954e-22
DENND1B	888.879	0.619358	0.0630729	9.81971	9.26051e-23	8.47287e-22
NSD3	1342.98	0.394923	0.0402303	9.81657	9.55421e-23	8.7372e-22
DIAPH1	2238.75	0.572867	0.0583607	9.81596	9.61175e-23	8.7854e-22
DISC1	13820.7	0.665966	0.0678512	9.81509	9.69543e-23	8.85743e-22
PSMD4	391.891	-0.854246	0.087048	-9.8135	9.8488e-23	8.99302e-22
PITPNA-AS1	115.143	-1.31775	0.134289	-9.81284	9.91415e-23	9.04816e-22
TMEM185B	39.571	-1.66788	0.169972	-9.81265	9.93216e-23	9.06005e-22
BBS9	14488	0.733564	0.0747581	9.8125	9.94696e-23	9.06899e-22
COX7A2	1596.6	-2.28245	0.232619	-9.81199	9.9979e-23	9.11087e-22
TRAM1L1	32.2573	-1.52781	0.15571	-9.81191	1.00057e-22	9.11341e-22
ROMO1	242.409	-2.05999	0.209955	-9.81161	1.00354e-22	9.13588e-22
KCNJ14	1946.96	-1.02224	0.104194	-9.81099	1.00976e-22	9.18792e-22
ACD	90.7148	-1.16765	0.119092	-9.80457	1.07601e-22	9.78579e-22
[truncated: 16,181 more rows]

## Sheet: Cone
symbol	baseMean	log2FoldChange	lfcSE	stat	pvalue	padj
UQCR11	209.782	-3.63817	0.188367	-19.3142	4.07903e-83	7.41567e-79
SQSTM1	112.978	-1.75198	0.094364	-18.5661	6.03935e-77	5.48977e-73
UQCRQ	253.607	-3.35054	0.184426	-18.1674	9.35382e-74	5.66841e-70
BCAS2	125.526	-1.99315	0.113456	-17.5676	4.36476e-69	1.98378e-65
PABPC1	120.136	-2.15579	0.123659	-17.4333	4.60708e-68	1.67514e-64
RPL31	233.457	-3.86673	0.222858	-17.3507	1.94894e-67	5.9053e-64
NDUFB9	186.062	-2.49737	0.144597	-17.2712	7.75598e-67	2.01434e-63
NDUFB1	253.203	-2.8785	0.16745	-17.1902	3.14194e-66	7.14005e-63
ID2	41.1633	-4.02704	0.235275	-17.1163	1.122e-65	2.01897e-62
CCT4	99.2685	-2.00235	0.117007	-17.113	1.18718e-65	2.01897e-62
EMC4	47.4795	-2.91378	0.170284	-17.1113	1.2216e-65	2.01897e-62
RUVBL2	62.9549	-2.67601	0.156606	-17.0876	1.83718e-65	2.78332e-62
PDIA3	89.3086	-1.7603	0.10312	-17.0704	2.46377e-65	3.34937e-62
SNRPD2	67.157	-3.45012	0.202143	-17.0678	2.57928e-65	3.34937e-62
IFT22	101.954	-2.07001	0.122888	-16.8446	1.149e-63	1.39259e-60
ELOC	78.7869	-2.36698	0.140611	-16.8335	1.3857e-63	1.5745e-60
HIST2H2BE	31.517	-3.60125	0.216816	-16.6097	5.92467e-62	6.33592e-59
SUMO1	163.021	-1.92711	0.11614	-16.593	7.8367e-62	7.91507e-59
SNRPG	94.676	-2.92906	0.177587	-16.4936	4.07657e-61	3.90063e-58
MTRNR2L12	31.4517	-9.0541	0.553502	-16.3578	3.82477e-60	3.47672e-57
AC073896.4	19.9811	21.2396	1.30422	16.2853	1.25545e-59	1.08686e-56
COPS8	105.178	-1.81614	0.11217	-16.1909	5.84694e-59	4.8317e-56
HSPB8	34.5881	-2.96539	0.183325	-16.1756	7.49268e-59	5.92248e-56
HIGD1A	85.8369	-3.35244	0.209414	-16.0087	1.11119e-57	8.41726e-55
TEX14	36.4909	-3.3247	0.208281	-15.9626	2.32898e-57	1.69363e-54
YBX1	620.44	-3.86994	0.242687	-15.9463	3.02522e-57	2.11533e-54
MYLIP	8.58614	-3.77946	0.237249	-15.9304	3.90126e-57	2.62685e-54
POLR2L	78.3119	-3.57941	0.225057	-15.9045	5.89817e-57	3.8296e-54
CAPZA2	83.6164	-1.63517	0.103186	-15.8467	1.48076e-56	9.2828e-54
C1orf43	114.084	-1.57729	0.0998262	-15.8004	3.09264e-56	1.87414e-53
NME1	545.276	-2.50597	0.158835	-15.7772	4.46723e-56	2.61982e-53
CHCHD10	453.444	-2.20891	0.140422	-15.7305	9.34719e-56	5.31037e-53
COX5A	190.9	-2.58233	0.164666	-15.6823	2.00004e-55	1.10184e-52
POMP	138.563	-2.64888	0.169158	-15.6592	2.87327e-55	1.53635e-52
PSAP	161.172	-2.07301	0.132576	-15.6364	4.11333e-55	2.13658e-52
YWHAE	289.632	-1.47778	0.0950411	-15.5488	1.61996e-54	8.18079e-52
TBRG1	71.1608	-1.60432	0.103211	-15.5441	1.74359e-54	8.56714e-52
EAPP	110.004	-1.18924	0.0765471	-15.536	1.97949e-54	9.47029e-52
IER2	36.8772	-3.16773	0.204248	-15.5093	3.00202e-54	1.3994e-51
HSPE1	148.155	-2.86938	0.185472	-15.4707	5.47048e-54	2.48633e-51
UQCRH	524.118	-2.6949	0.175374	-15.3666	2.74346e-53	1.18753e-50
JUN	99.5604	-3.82353	0.248809	-15.3673	2.71051e-53	1.18753e-50
RAB3A	85.0059	-3.26236	0.213054	-15.3124	6.3232e-53	2.67339e-50
HERPUD1	43.9016	-2.02467	0.132916	-15.2327	2.1446e-52	8.8611e-50
TMA7	378.706	-2.76725	0.182362	-15.1744	5.2219e-52	2.10965e-49
FOSB	11.7744	-4.90111	0.323527	-15.149	7.69523e-52	3.04129e-49
BAG1	106.137	-2.88608	0.190655	-15.1377	9.13747e-52	3.53445e-49
SARAF	226.023	-2.15639	0.142692	-15.1121	1.34694e-51	5.10154e-49
GOT1	216.676	-0.98845	0.0657816	-15.0262	4.94274e-51	1.83386e-48
NDUFS8	116.67	-2.11485	0.141333	-14.9636	1.27012e-50	4.61816e-48
RNF181	28.8959	-2.96516	0.1982	-14.9604	1.33182e-50	4.74755e-48
CHCHD5	30.4338	-2.445	0.163774	-14.9291	2.13236e-50	7.45507e-48
NENF	53.5233	-3.22048	0.215828	-14.9215	2.38767e-50	8.19016e-48
COX7C	343.145	-3.51705	0.236322	-14.8824	4.28572e-50	1.44286e-47
H3F3B	675.242	-2.67493	0.180042	-14.8573	6.24233e-50	2.06337e-47
PAIP2	186.275	-1.81311	0.12206	-14.8543	6.52607e-50	2.11864e-47
SNX3	116.05	-1.86955	0.126317	-14.8005	1.45363e-49	4.63631e-47
PFN1	31.537	-3.33497	0.225695	-14.7764	2.07959e-49	6.51843e-47
NDUFA6	100.043	-2.7161	0.184195	-14.7458	3.2748e-49	1.00908e-46
NAA38	145.559	-2.16672	0.147087	-14.7309	4.08469e-49	1.23766e-46
PHKB	390.922	0.966078	0.0658565	14.6694	1.01171e-48	3.01522e-46
VAMP2	620.891	-2.7685	0.18904	-14.645	1.45e-48	4.25177e-46
RPL4	189.954	-3.96928	0.271277	-14.6319	1.75874e-48	5.07523e-46
CITED2	20.6841	-3.12692	0.213791	-14.6261	1.91524e-48	5.44049e-46
SNU13	100.732	-2.43101	0.166718	-14.5816	3.67947e-48	1.02912e-45
EIF1	430.544	-2.87696	0.19767	-14.5543	5.4822e-48	1.5101e-45
MIEN1	21.5818	-3.37463	0.232095	-14.5398	6.77528e-48	1.83843e-45
CSNK2B	42.954	-2.40271	0.165574	-14.5114	1.02578e-47	2.74244e-45
STRAP	172.511	-1.46375	0.100962	-14.4981	1.24526e-47	3.28099e-45
PSMA7	109.548	-2.46305	0.170226	-14.4693	1.89421e-47	4.91954e-45
NDUFB4	163.375	-2.69429	0.186277	-14.4639	2.04934e-47	5.24747e-45
YPEL5	164.227	-1.63349	0.112954	-14.4615	2.12235e-47	5.35893e-45
ANAPC13	39.5805	-2.81523	0.194839	-14.449	2.54246e-47	6.33176e-45
NDUFA2	114.648	-3.40821	0.2361	-14.4354	3.09653e-47	7.60742e-45
SNCB	121.286	-2.15254	0.149243	-14.423	3.709e-47	8.99061e-45
GABARAP	106.593	-3.12397	0.216657	-14.419	3.93168e-47	9.405e-45
LSM5	67.1862	-1.6703	0.115905	-14.411	4.41338e-47	1.04202e-44
PDE6H	4024.79	-2.58709	0.179996	-14.3731	7.6365e-47	1.77989e-44
MORF4L1	317.078	-1.47658	0.102832	-14.3592	9.33119e-47	2.14736e-44
AMD1	64.283	-1.8612	0.129967	-14.3205	1.63004e-46	3.70426e-44
NDUFB6	104.369	-2.09094	0.146117	-14.31	1.89434e-46	4.25173e-44
OST4	81.0484	-3.29188	0.230507	-14.281	2.87326e-46	6.37023e-44
ZFAS1	101.65	-2.32227	0.163151	-14.2339	5.6464e-46	1.23676e-43
TMEM59	178.061	-1.95277	0.13773	-14.1782	1.2498e-45	2.70492e-43
ELOVL4	265.227	-1.39863	0.098799	-14.1564	1.70629e-45	3.64945e-43
TBCB	55.7197	-2.42917	0.171718	-14.1463	1.96798e-45	4.16021e-43
JTB	55.1356	-2.28559	0.161978	-14.1105	3.27167e-45	6.83666e-43
RACK1	203.425	-2.85978	0.202732	-14.1062	3.47902e-45	7.18735e-43
NUDC	108.878	-1.76492	0.125302	-14.0853	4.67394e-45	9.54744e-43
RBM8A	60.7459	-2.01341	0.143009	-14.0789	5.11689e-45	1.03361e-42
TIMM17B	42.6639	-2.42905	0.172542	-14.078	5.18537e-45	1.03594e-42
GAMT	60.7484	-1.58043	0.112343	-14.0679	5.98162e-45	1.18202e-42
TRIR	79.7537	-2.16235	0.153744	-14.0647	6.26038e-45	1.2238e-42
RAC1	92.2604	-1.56276	0.111213	-14.0519	7.49537e-45	1.44964e-42
NDUFS7	100.815	-1.98216	0.141127	-14.0452	8.2492e-45	1.57864e-42
BSG	325.938	-1.45179	0.103406	-14.0396	8.91885e-45	1.68901e-42
VCP	188.491	-1.39789	0.0997465	-14.0144	1.27205e-44	2.38412e-42
COX6B1	217.044	-2.93978	0.209874	-14.0074	1.40483e-44	2.60611e-42
EIF4A1	123.28	-1.774	0.12684	-13.9861	1.89442e-44	3.47884e-42
ACOT7	135.735	-1.24732	0.0892353	-13.9779	2.1279e-44	3.86853e-42
SPAG7	86.1552	-1.63655	0.117108	-13.9747	2.22522e-44	4.00539e-42
ANKRD10	289.319	1.17474	0.0840952	13.9691	2.40565e-44	4.28772e-42
PTGES3	187.73	-2.10955	0.151232	-13.9491	3.18389e-44	5.61972e-42
BOLA3	57.816	-2.07088	0.148578	-13.938	3.72452e-44	6.51074e-42
ARPC2	108.03	-1.30599	0.0937268	-13.934	3.93508e-44	6.78166e-42
NDUFA1	236.149	-3.16262	0.226977	-13.9337	3.9541e-44	6.78166e-42
MRPL20	75.1662	-1.98727	0.142774	-13.919	4.85818e-44	8.25436e-42
NHP2	42.3939	-2.75601	0.198197	-13.9054	5.87315e-44	9.88646e-42
PTRHD1	19.7054	-3.79949	0.27404	-13.8647	1.03593e-43	1.72782e-41
PFN2	69.3809	-2.34859	0.170166	-13.8018	2.48589e-43	4.1085e-41
ZNF385A	251.937	-1.77736	0.129656	-13.7083	9.05549e-43	1.48314e-40
TBCA	279.027	-1.29752	0.0947644	-13.692	1.13289e-42	1.83892e-40
HNRNPA0	58.1364	-2.03347	0.148586	-13.6855	1.24026e-42	1.99539e-40
EIF3E	132.073	-1.8501	0.135612	-13.6426	2.23329e-42	3.56152e-40
YWHAQ	145.12	-1.34056	0.0983954	-13.6242	2.87379e-42	4.54308e-40
GABARAPL1	204.859	-1.37979	0.101322	-13.6178	3.13701e-42	4.91645e-40
RPLP2	265.41	-3.46947	0.254806	-13.6162	3.21032e-42	4.98835e-40
AC034154.1	31.1059	20.8108	1.52932	13.6079	3.5947e-42	5.53827e-40
CCDC124	28.2379	-2.6042	0.191682	-13.5861	4.84308e-42	7.39893e-40
BAD	45.5028	-2.33358	0.17192	-13.5736	5.74249e-42	8.69987e-40
TRAC	97.4966	-2.36849	0.174608	-13.5646	6.49134e-42	9.7531e-40
CACYBP	88.3254	-2.01099	0.148398	-13.5514	7.77595e-42	1.15874e-39
COX17	168.576	-3.46166	0.255566	-13.5451	8.47395e-42	1.25249e-39
CIART	37.1869	-1.94826	0.143877	-13.5412	8.9317e-42	1.3095e-39
POLR2G	42.4062	-2.83106	0.209179	-13.5342	9.82515e-42	1.42897e-39
OAZ2	197.134	-1.61505	0.11943	-13.5231	1.14335e-41	1.64969e-39
RPS15A	325.783	-3.36192	0.248648	-13.5208	1.1792e-41	1.68802e-39
OAZ1	284.018	-2.76473	0.204856	-13.496	1.65199e-41	2.34635e-39
NDUFA11	102.4	-2.41025	0.178689	-13.4885	1.82684e-41	2.57457e-39
BEX5	29.6451	-2.99027	0.221908	-13.4753	2.18651e-41	3.05775e-39
PSMB5	54.2914	-2.34946	0.174381	-13.4732	2.24993e-41	3.12243e-39
HINT2	43.9124	-2.81963	0.20937	-13.4672	2.44018e-41	3.36079e-39
SLC25A5	136.876	-3.15995	0.234653	-13.4665	2.46317e-41	3.36695e-39
ANAPC11	82.9078	-3.14328	0.233567	-13.4577	2.77493e-41	3.76479e-39
COX5B	300.18	-2.92841	0.217611	-13.4571	2.79747e-41	3.76725e-39
SERF2	185.094	-2.66412	0.198051	-13.4517	3.00952e-41	4.02302e-39
PMVK	45.605	-2.57151	0.19122	-13.4479	3.16715e-41	4.20284e-39
ARL4A	29.2485	-2.33287	0.173713	-13.4295	4.06276e-41	5.35225e-39
RPL36A	139.512	-3.40886	0.253942	-13.4238	4.38807e-41	5.73921e-39
NDUFA3	79.4126	-2.85359	0.212617	-13.4213	4.53836e-41	5.89338e-39
STMN1	239.584	-2.44385	0.182243	-13.4098	5.2959e-41	6.82833e-39
AHSA1	62.8734	-2.23795	0.166954	-13.4046	5.68151e-41	7.27394e-39
FKBP3	98.9679	-1.79159	0.133677	-13.4023	5.86057e-41	7.45072e-39
UBE2L3	91.5051	-1.17096	0.087391	-13.3991	6.12269e-41	7.72989e-39
PSMC3	40.9613	-2.20692	0.164931	-13.3809	7.81959e-41	9.80414e-39
RPL28	341.752	-3.18219	0.237946	-13.3736	8.62628e-41	1.07415e-38
BLOC1S1	102.064	-2.29965	0.172039	-13.367	9.42131e-41	1.16517e-38
PYURF	42.58	-2.3703	0.177447	-13.3578	1.06673e-40	1.30545e-38
PPP1CA	24.8592	-2.40807	0.180277	-13.3576	1.06993e-40	1.30545e-38
RNF139	27.492	-1.87867	0.140701	-13.3522	1.14975e-40	1.39349e-38
HSPA9	143.364	-0.898377	0.0673114	-13.3466	1.2402e-40	1.49317e-38
TRAPPC8	333.866	0.900085	0.0675879	13.3173	1.83735e-40	2.19757e-38
COX7A2	324.091	-3.44723	0.259041	-13.3077	2.08886e-40	2.48206e-38
UXT	35.299	-2.09881	0.157749	-13.3047	2.17325e-40	2.56557e-38
EEF1D	68.0235	-2.29352	0.172571	-13.2903	2.63344e-40	3.08877e-38
DSTN	155.759	-2.50784	0.189281	-13.2493	4.5553e-40	5.30867e-38
XRCC6	116.965	-1.05988	0.0800157	-13.2459	4.76524e-40	5.51796e-38
RBX1	148.844	-1.70663	0.128863	-13.2437	4.90454e-40	5.64333e-38
COX7B	218.023	-2.45471	0.185563	-13.2285	6.01012e-40	6.87195e-38
LAMTOR2	31.6569	-2.69906	0.204112	-13.2234	6.42493e-40	7.30033e-38
HIST1H2BD	6.28125	-4.43291	0.335407	-13.2165	7.0458e-40	7.95606e-38
ERG28	70.492	-1.96452	0.148788	-13.2034	8.38417e-40	9.4089e-38
DDX17	974.467	0.927085	0.0702217	13.2023	8.51284e-40	9.49469e-38
SEZ6L2	138.984	-1.35332	0.102597	-13.1906	9.93707e-40	1.10156e-37
SEC62	693.891	-1.58504	0.120227	-13.1837	1.0892e-39	1.19287e-37
KARS	93.0106	-1.42129	0.107805	-13.1839	1.08697e-39	1.19287e-37
GAS5	55.1537	-2.46558	0.187031	-13.1827	1.10318e-39	1.20095e-37
NDUFB2	237.242	-2.81743	0.21378	-13.1791	1.15794e-39	1.25306e-37
SNRPF	51.6056	-1.84019	0.139765	-13.1663	1.37186e-39	1.47576e-37
RPS17	173.143	-4.46345	0.339411	-13.1506	1.6884e-39	1.80559e-37
NDUFA7	108.956	-2.71652	0.206696	-13.1426	1.87719e-39	1.99575e-37
COPS9	79.6215	-3.29031	0.25042	-13.1392	1.96306e-39	2.07491e-37
MEA1	24.3974	-3.36584	0.256373	-13.1287	2.25589e-39	2.37064e-37
NDUFA8	84.5837	-2.36233	0.180333	-13.0998	3.3e-39	3.44793e-37
BTG1	140.408	-2.35201	0.179688	-13.0894	3.78755e-39	3.93472e-37
SCG3	122.896	-2.02536	0.154759	-13.0872	3.89948e-39	4.02799e-37
HMGB1	427.318	-1.5641	0.119689	-13.068	5.01377e-39	5.14974e-37
RNASEK	133.588	-2.28551	0.174989	-13.0609	5.50746e-39	5.62503e-37
PA2G4	45.6469	-1.96388	0.150457	-13.0527	6.13067e-39	6.22657e-37
SNRPB2	33.2449	-1.89716	0.145402	-13.0477	6.55072e-39	6.61622e-37
PPP4C	46.2216	-1.43915	0.110515	-13.0222	9.14392e-39	9.18434e-37
ZNHIT1	44.5562	-2.29281	0.176079	-13.0215	9.2294e-39	9.21926e-37
HSP90B1	92.3392	-2.26184	0.173969	-13.0014	1.20145e-38	1.19357e-36
CCNG1	31.7457	-1.99182	0.153454	-12.9799	1.59015e-38	1.57113e-36
CIRBP	581.65	-1.70502	0.131396	-12.9762	1.66975e-38	1.64087e-36
EIF5	148.274	-1.31638	0.101507	-12.9684	1.84898e-38	1.80723e-36
EIF3K	177.099	-1.70097	0.131227	-12.9621	2.00671e-38	1.95091e-36
TSR2	38.5551	-2.29142	0.176859	-12.9562	2.16604e-38	2.09461e-36
MYL6	762.824	-2.03146	0.156813	-12.9547	2.21078e-38	2.12656e-36
KHDRBS1	231.079	-0.933454	0.0720895	-12.9485	2.3948e-38	2.29144e-36
MRPL57	75.1624	-2.35951	0.182353	-12.9392	2.70412e-38	2.56046e-36
SUMO2	175.37	-2.5447	0.196666	-12.9392	2.70384e-38	2.56046e-36
COPE	81.741	-2.15939	0.166922	-12.9365	2.79965e-38	2.63718e-36
TSEN34	34.8934	-2.10932	0.163136	-12.9299	3.05375e-38	2.86171e-36
C9orf116	22.6896	-2.41466	0.186934	-12.9172	3.60001e-38	3.35632e-36
UBL5	184.18	-3.25595	0.252113	-12.9146	3.72268e-38	3.45298e-36
RBM42	23.034	-2.36624	0.183247	-12.9128	3.81165e-38	3.51756e-36
NAXE	18.2196	-2.65039	0.205307	-12.9094	3.98404e-38	3.65808e-36
NDUFS3	75.2073	-1.96887	0.152688	-12.8948	4.81761e-38	4.40121e-36
NDUFC1	140.492	-2.5496	0.197786	-12.8907	5.07938e-38	4.61716e-36
NDUFB7	113.852	-2.93712	0.227969	-12.8838	5.55109e-38	5.02084e-36
SEC61B	84.3644	-1.85654	0.144212	-12.8737	6.332e-38	5.6988e-36
DPY30	61.6211	-1.69241	0.131515	-12.8686	6.763e-38	6.05672e-36
CYC1	88.8505	-2.27713	0.177195	-12.851	8.48977e-38	7.56588e-36
UQCRFS1	105.457	-2.04735	0.159441	-12.8408	9.6867e-38	8.59045e-36
FAM229B	53.5276	-1.79774	0.140074	-12.8342	1.05434e-37	9.30478e-36
RPS19BP1	63.3436	-2.82798	0.22038	-12.8323	1.08143e-37	9.49776e-36
RALY	123.36	-1.25118	0.0976468	-12.8134	1.3801e-37	1.20626e-35
SF3B6	58.6353	-2.59927	0.202863	-12.8129	1.38793e-37	1.20655e-35
C12orf57	56.2069	-2.10571	0.164347	-12.8126	1.3937e-37	1.20655e-35
CFAP20	51.1382	-1.63316	0.127514	-12.8077	1.48477e-37	1.2793e-35
PIN1	75.6414	-2.3086	0.180257	-12.8073	1.49297e-37	1.28029e-35
SLC39A6	39.402	-1.84573	0.144384	-12.7835	2.02773e-37	1.73071e-35
RNF5	27.5538	-2.6737	0.209352	-12.7713	2.37094e-37	2.01419e-35
PDZD11	25.2856	-2.21829	0.173785	-12.7646	2.58615e-37	2.1868e-35
UFC1	55.3185	-2.16363	0.169508	-12.7642	2.59924e-37	2.18769e-35
PFDN2	69.0476	-2.11316	0.165713	-12.7519	3.0419e-37	2.54847e-35
MLF1	87.7688	-1.66789	0.130817	-12.7498	3.12441e-37	2.60558e-35
RCVRN	1668.81	-2.40842	0.189043	-12.7401	3.54114e-37	2.93963e-35
HACD3	150.547	-0.865033	0.0679203	-12.736	3.72998e-37	3.08232e-35
TMEM230	189.849	-1.52437	0.119731	-12.7316	3.94568e-37	3.24581e-35
ARL4D	209.339	-2.4047	0.188975	-12.7249	4.29784e-37	3.51958e-35
TMEM258	54.8284	-2.52233	0.198309	-12.7192	4.62498e-37	3.7705e-35
OCIAD2	76.4024	-2.06228	0.162216	-12.7132	4.99474e-37	4.05377e-35
HIST1H1C	60.8213	-3.02136	0.238119	-12.6885	6.8518e-37	5.53626e-35
SCAND1	81.9869	-2.5133	0.198313	-12.6734	8.30233e-37	6.6786e-35
PSME1	31.7671	-2.77314	0.218843	-12.6718	8.4749e-37	6.78739e-35
NOP10	31.6223	-3.12092	0.246347	-12.6688	8.80432e-37	7.02028e-35
IP6K2	179.515	-0.9574	0.0756518	-12.6553	1.04517e-36	8.29745e-35
TIMM8B	58.6691	-1.87747	0.148373	-12.6537	1.06683e-36	8.43258e-35
RPN2	79.8013	-1.23242	0.097431	-12.6492	1.1309e-36	8.90035e-35
GNGT2	421.965	-2.02771	0.160317	-12.6481	1.14671e-36	8.98588e-35
FKBP8	74.3175	-2.235	0.176754	-12.6447	1.19639e-36	9.33489e-35
PSMB3	62.9578	-2.47279	0.195646	-12.6392	1.28424e-36	9.97752e-35
RPS26	209.742	-3.0758	0.243363	-12.6387	1.29143e-36	9.99075e-35
NDUFA12	107.549	-1.99252	0.157666	-12.6376	1.30997e-36	1.00912e-34
PHF5A	23.4359	-2.04454	0.161839	-12.6331	1.38619e-36	1.06333e-34
NEDD8	118.497	-2.13559	0.169054	-12.6326	1.39619e-36	1.0665e-34
POLR2C	56.4229	-1.58672	0.125617	-12.6314	1.41681e-36	1.07772e-34
MRPL55	44.3649	-2.26766	0.179593	-12.6267	1.50539e-36	1.14033e-34
RAD23A	73.5601	-1.54851	0.12267	-12.6234	1.56984e-36	1.18422e-34
EIF4G2	108.9	-1.8937	0.150056	-12.6199	1.63977e-36	1.23186e-34
DNAJB6	202.385	-1.38617	0.110028	-12.5984	2.15558e-36	1.61269e-34
SNRPC	36.9742	-1.70768	0.135762	-12.5785	2.7732e-36	2.06626e-34
NDUFS6	118.755	-2.21134	0.175972	-12.5665	3.22828e-36	2.39551e-34
AKR1B1	28.16	-1.94593	0.154902	-12.5623	3.40118e-36	2.51355e-34
HIGD2A	49.5648	-2.35212	0.187257	-12.5609	3.46362e-36	2.54934e-34
ATRAID	46.749	-2.419	0.192719	-12.5519	3.87855e-36	2.84323e-34
TMEM256	34.7861	-2.38033	0.189664	-12.5503	3.96099e-36	2.892e-34
PRDX6	69.7296	-1.94152	0.154844	-12.5386	4.59155e-36	3.33897e-34
PCNP	116.095	-1.51466	0.120855	-12.5329	4.93213e-36	3.57235e-34
CFL1	117.412	-2.76778	0.220894	-12.5299	5.12205e-36	3.69519e-34
ROMO1	56.9744	-2.86484	0.228708	-12.5262	5.36863e-36	3.85777e-34
SYF2	53.8159	-1.62708	0.130012	-12.5148	6.19389e-36	4.41588e-34
ZCRB1	73.5746	-1.67376	0.133742	-12.5148	6.19273e-36	4.41588e-34
ARL2BP	43.9014	-1.73733	0.138916	-12.5063	6.89395e-36	4.89578e-34
C19orf53	56.3524	-3.10665	0.248545	-12.4994	7.52589e-36	5.32376e-34
BUD31	28.6354	-2.77013	0.221973	-12.4796	9.65023e-36	6.80005e-34
RPS8	290.769	-3.45004	0.276682	-12.4693	1.09732e-35	7.70244e-34
NDUFAF3	37.2715	-3.02653	0.242813	-12.4644	1.16723e-35	8.16164e-34
LAMTOR4	64.6984	-2.48597	0.199489	-12.4617	1.20772e-35	8.41239e-34
SELENOW	260.011	-1.69131	0.135734	-12.4604	1.22737e-35	8.51663e-34
COX14	114.686	-2.83255	0.227478	-12.452	1.3639e-35	9.42801e-34
PAFAH1B3	28.1982	-2.63378	0.211531	-12.451	1.38105e-35	9.51042e-34
FLYWCH2	39.956	-1.87536	0.150668	-12.447	1.45195e-35	9.9609e-34
SUB1	113.91	-1.8864	0.151583	-12.4447	1.49513e-35	1.02186e-33
MRPS7	77.9765	-1.62564	0.130694	-12.4386	1.61313e-35	1.09838e-33
HSBP1	95.9207	-2.73169	0.219653	-12.4364	1.659e-35	1.1254e-33
PPP1R2	125.705	-1.07991	0.0868393	-12.4357	1.67275e-35	1.1305e-33
TM2D2	21.7103	-2.64676	0.212945	-12.4293	1.8129e-35	1.22069e-33
TMEM219	55.2876	-1.7606	0.141727	-12.4224	1.97474e-35	1.32475e-33
DYNLL1	204.892	-1.96873	0.158646	-12.4096	2.31906e-35	1.55002e-33
EIF3H	137.656	-1.1765	0.0948096	-12.4091	2.33155e-35	1.55266e-33
ATP6AP2	64.6748	-2.24127	0.180775	-12.3981	2.67695e-35	1.77616e-33
MRPL12	23.2904	-2.27808	0.183819	-12.3931	2.84864e-35	1.88321e-33
ITM2B	460.402	-1.85957	0.150101	-12.3888	3.00539e-35	1.97964e-33
EDF1	125.22	-2.01127	0.162395	-12.385	3.15014e-35	2.0675e-33
PTMS	402.399	-1.63926	0.132405	-12.3807	3.32594e-35	2.17502e-33
ERH	134.52	-2.06103	0.166537	-12.3758	3.53545e-35	2.30375e-33
RPS25	415.603	-3.7184	0.300838	-12.3602	4.29343e-35	2.78766e-33
EIF3D	46.3298	-1.38341	0.112008	-12.3511	4.80634e-35	3.10958e-33
NFIA-AS2	4.87221	-6.17888	0.500607	-12.3428	5.32808e-35	3.43491e-33
RPF1	44.4945	-1.35982	0.110178	-12.342	5.38075e-35	3.45661e-33
ARPP19	167.261	-1.05774	0.085825	-12.3244	6.69434e-35	4.28532e-33
CHMP2A	73.4214	-2.47309	0.200704	-12.3221	6.88788e-35	4.39374e-33
GADD45GIP1	72.5525	-3.02395	0.245598	-12.3126	7.74561e-35	4.92361e-33
ELOB	138.989	-3.15849	0.256709	-12.3038	8.64101e-35	5.47364e-33
DDAH2	64.4928	-1.95776	0.159126	-12.3032	8.70608e-35	5.49571e-33
SSU72	64.8161	-1.70211	0.138382	-12.3001	9.04491e-35	5.68985e-33
BAMBI	9.32084	-2.81559	0.229131	-12.2882	1.04878e-34	6.57479e-33
PFDN5	275.613	-2.5884	0.210708	-12.2843	1.09995e-34	6.87188e-33
AC018521.5	31.0131	-2.50048	0.203562	-12.2836	1.10933e-34	6.90669e-33
TUBA1B	537.862	-2.40536	0.195857	-12.2812	1.14295e-34	7.09175e-33
NGRN	133.833	-2.92734	0.238371	-12.2806	1.15155e-34	7.12083e-33
DNAJB1	78.167	-2.02074	0.164655	-12.2725	1.27209e-34	7.81305e-33
NAPA	177.688	-1.04612	0.0852398	-12.2726	1.27082e-34	7.81305e-33
SLC25A33	195.257	-1.03187	0.0840912	-12.2708	1.29932e-34	7.95339e-33
AC136604.2	48.8729	-1.85275	0.151069	-12.2642	1.40917e-34	8.59689e-33
SNHG7	37.3873	-1.85711	0.151548	-12.2542	1.59485e-34	9.69709e-33
EIF1B	130.67	-1.82291	0.148787	-12.2518	1.6431e-34	9.95719e-33
MRPS36	99.389	-1.39539	0.114086	-12.231	2.12198e-34	1.28164e-32
HIST1H2AC	56.0684	-2.74855	0.224902	-12.2211	2.39861e-34	1.44393e-32
CWC15	52.2109	-1.79402	0.146804	-12.2205	2.41631e-34	1.44978e-32
DAZAP2	34.4539	-1.58182	0.12971	-12.195	3.30459e-34	1.97623e-32
GEM	176.494	-2.08615	0.171074	-12.1945	3.32743e-34	1.98336e-32
SKP1	269.784	-2.1172	0.173666	-12.1912	3.46102e-34	2.05625e-32
MOCS2	43.5014	-1.97266	0.161851	-12.1881	3.59509e-34	2.12895e-32
ALKBH7	81.8785	-2.81722	0.231219	-12.1842	3.77218e-34	2.22657e-32
MRPL14	100.019	-1.75292	0.144041	-12.1696	4.51354e-34	2.65554e-32
OXA1L	22.8331	-2.01157	0.16535	-12.1655	4.74417e-34	2.78222e-32
RPS6	441.91	-3.62792	0.298251	-12.164	4.83371e-34	2.82562e-32
RSL1D1	42.2542	-1.53176	0.125943	-12.1623	4.93241e-34	2.87408e-32
UNC119	1474.54	-1.62138	0.13333	-12.1607	5.03407e-34	2.92394e-32
EIF3I	37.9404	-2.25969	0.186042	-12.1462	6.01218e-34	3.48094e-32
FAM32A	21.532	-2.09155	0.172206	-12.1456	6.05195e-34	3.49284e-32
CDH20	33.2076	-4.95013	0.408098	-12.1298	7.34696e-34	4.22683e-32
EIF3L	56.8581	-1.53478	0.126572	-12.1257	7.72037e-34	4.42764e-32
COX4I1	321.281	-2.46029	0.202989	-12.1203	8.24523e-34	4.71378e-32
MRPL52	29.3802	-2.05668	0.169786	-12.1134	8.97389e-34	5.11427e-32
TECR	185.619	-1.82148	0.150428	-12.1087	9.50296e-34	5.39887e-32
NUDT14	26.2327	-2.11741	0.174931	-12.1043	1.00267e-33	5.67868e-32
AP000893.2	20.6907	20.3953	1.68505	12.1036	1.01022e-33	5.70364e-32
CPE	918.626	-0.86245	0.0712625	-12.1024	1.02534e-33	5.77113e-32
PPP2CA	121.406	-0.857195	0.0708922	-12.0915	1.17099e-33	6.57053e-32
TOMM5	48.4485	-2.41026	0.199413	-12.0868	1.24048e-33	6.93903e-32
SMIM30	50.2358	-2.68055	0.22201	-12.074	1.44924e-33	8.08197e-32
DRAP1	66.6058	-2.31062	0.191426	-12.0706	1.51066e-33	8.3987e-32
MAFB	5.40029	-5.08133	0.421209	-12.0637	1.64266e-33	9.10475e-32
BTF3	112.559	-2.8346	0.235202	-12.0518	1.89781e-33	1.0487e-31
SF3B2	126.398	-1.19396	0.0992064	-12.0352	2.322e-33	1.27921e-31
C9orf16	42.4661	-2.56889	0.213547	-12.0296	2.48283e-33	1.36368e-31
RAB39A	14.2825	-3.08873	0.256851	-12.0254	2.61433e-33	1.43158e-31
ST13	130.444	-1.86173	0.154993	-12.0118	3.08224e-33	1.68274e-31
HIST1H2BG	10.4207	-5.98329	0.498238	-12.0089	3.19107e-33	1.73694e-31
AC022217.3	5.93165	-4.19727	0.349539	-12.008	3.22417e-33	1.74451e-31
COMMD6	64.3504	-2.22431	0.185231	-12.0083	3.21465e-33	1.74451e-31
TUB	356.331	0.861162	0.0718439	11.9866	4.17792e-33	2.25384e-31
SERINC1	130.015	-1.43295	0.119569	-11.9843	4.29438e-33	2.30982e-31
DDIT3	128.627	-2.00978	0.167743	-11.9813	4.45369e-33	2.38844e-31
CRY1	119.756	-1.43992	0.12019	-11.9804	4.50272e-33	2.40763e-31
RPL5	223.445	-2.51203	0.209804	-11.9733	4.90631e-33	2.61574e-31
DNAJA1	114.631	-2.42436	0.202519	-11.971	5.04086e-33	2.6718e-31
TMEM147	62.1916	-2.59194	0.216515	-11.9712	5.0318e-33	2.6718e-31
MLF2	86.523	-1.54254	0.128867	-11.97	5.10056e-33	2.69558e-31
RHBDD2	41.5081	-1.81516	0.15194	-11.9466	6.76282e-33	3.56371e-31
PPP1R15A	22.9159	-3.47035	0.290551	-11.944	6.97759e-33	3.66626e-31
HNRNPH2	61.0986	-1.87914	0.157337	-11.9434	7.02877e-33	3.68251e-31
ADIPOR1	106.047	-1.7988	0.15064	-11.941	7.23237e-33	3.77829e-31
LSM1	34.85	-2.0733	0.173799	-11.9293	8.32968e-33	4.33907e-31
ARL6IP1	401.686	-2.58977	0.217221	-11.9223	9.05892e-33	4.70546e-31
CANX	182.488	-1.23558	0.103674	-11.918	9.54138e-33	4.94195e-31
C15orf61	71.2196	-2.12268	0.178193	-11.9123	1.02137e-32	5.27513e-31
CRY2	105.545	-1.11669	0.0937655	-11.9094	1.05756e-32	5.44659e-31
CETN2	30.9661	-2.51296	0.211012	-11.9091	1.06141e-32	5.45098e-31
LSM3	50.419	-2.57803	0.216491	-11.9082	1.07221e-32	5.49092e-31
TTR	549.78	-2.97335	0.250273	-11.8804	1.49591e-32	7.63923e-31
DNAJB9	26.6054	-2.46435	0.207465	-11.8784	1.53322e-32	7.80783e-31
RPL35A	334.66	-3.38419	0.285071	-11.8714	1.66637e-32	8.4622e-31
COX8A	168.31	-3.29311	0.277447	-11.8693	1.70854e-32	8.65215e-31
GLO1	146.329	-1.92544	0.162234	-11.8683	1.72993e-32	8.73617e-31
NABP2	25.3097	-1.93795	0.163436	-11.8575	1.96656e-32	9.9036e-31
AIPL1	953.103	-1.55889	0.131516	-11.8532	2.07206e-32	1.04061e-30
ATP6V1F	88.5708	-2.97461	0.251055	-11.8485	2.19169e-32	1.09766e-30
SDHB	118.857	-0.941553	0.0795084	-11.8422	2.36203e-32	1.17972e-30
RPL34	519.231	-3.65992	0.30914	-11.839	2.4522e-32	1.2214e-30
ERGIC3	43.8578	-1.61954	0.136827	-11.8365	2.52928e-32	1.25635e-30
AL691403.1	11.4761	-3.53149	0.298431	-11.8335	2.61856e-32	1.29715e-30
TEX264	74.8864	-1.75216	0.148557	-11.7945	4.16539e-32	2.05779e-30
UROS	84.3993	-1.2396	0.105111	-11.7932	4.23139e-32	2.08473e-30
PPDPF	63.8659	-2.94476	0.249713	-11.7926	4.26354e-32	2.0949e-30
MRPL21	45.3825	-1.95732	0.166014	-11.7901	4.39047e-32	2.15145e-30
AK1	53.1897	-3.01267	0.255593	-11.787	4.55667e-32	2.22689e-30
UQCR10	243.445	-3.05854	0.259865	-11.7697	5.59183e-32	2.72545e-30
CDC42EP3	37.5894	-2.27655	0.193513	-11.7643	5.95993e-32	2.8971e-30
LSM2	35.7177	-1.80688	0.153843	-11.745	7.4963e-32	3.63421e-30
CLPP	25.4006	-1.74185	0.148411	-11.7367	8.26798e-32	3.99766e-30
RPL12	261.506	-3.67306	0.312995	-11.7352	8.41156e-32	4.05629e-30
CTR9	115.116	-0.997604	0.0850119	-11.7349	8.445e-32	4.06164e-30
CAMLG	78.0508	-1.65825	0.141392	-11.728	9.15439e-32	4.39121e-30
PIGH	68.2863	-1.37566	0.117344	-11.7232	9.68967e-32	4.63574e-30
PPP2R1A	82.6123	-1.49693	0.12821	-11.6756	1.69859e-31	8.10507e-30
TRAPPC1	39.8501	-2.96525	0.254073	-11.6709	1.79588e-31	8.54687e-30
MTRNR2L8	26.5335	-8.0229	0.687607	-11.6679	1.86056e-31	8.8316e-30
TCEAL8	36.6963	-2.21912	0.190241	-11.6648	1.92915e-31	9.13332e-30
LIN7B	42.4863	-1.75531	0.150496	-11.6635	1.95936e-31	9.25227e-30
ATP6V1G1	139.069	-2.60784	0.223701	-11.6577	2.09659e-31	9.87459e-30
TIMM17A	87.2705	-1.26723	0.108745	-11.6532	2.20918e-31	1.0378e-29
PTMA	540.76	-3.11239	0.267123	-11.6515	2.25448e-31	1.05635e-29
GTF3C6	33.416	-2.1916	0.188232	-11.6431	2.48785e-31	1.1627e-29
APLP1	25.4687	-2.29645	0.197308	-11.6389	2.61261e-31	1.21788e-29
IFI6	21.2463	-2.61995	0.225195	-11.6341	2.76367e-31	1.285e-29
RPS29	416.608	-3.12927	0.269426	-11.6146	3.47484e-31	1.61154e-29
NDUFA4	708.436	-3.06154	0.263613	-11.6138	3.50873e-31	1.62312e-29
CUTA	79.6449	-2.43672	0.210055	-11.6004	4.10144e-31	1.89249e-29
RPL6	330.339	-3.10662	0.267869	-11.5975	4.24199e-31	1.95239e-29
GRINA	133.396	-1.75762	0.15158	-11.5954	4.3504e-31	1.99723e-29
CCDC85B	105.323	-2.56517	0.221302	-11.5913	4.56309e-31	2.0896e-29
MLLT11	42.698	-2.47348	0.213398	-11.5909	4.58245e-31	2.09319e-29
RPS28	460.724	-3.25307	0.280673	-11.5903	4.61668e-31	2.10354e-29
EMC6	40.1354	-2.32988	0.201141	-11.5833	5.00525e-31	2.27488e-29
PPP1CC	246.455	-1.1248	0.0971806	-11.5743	5.56183e-31	2.52155e-29
VBP1	52.2871	-2.0017	0.172964	-11.5729	5.65263e-31	2.55634e-29
ADRM1	20.1902	-2.41649	0.208825	-11.5718	5.72447e-31	2.58241e-29
COA3	27.9533	-2.66793	0.230596	-11.5697	5.86709e-31	2.64019e-29
DEDD2	17.0061	-2.01972	0.17458	-11.5691	5.91135e-31	2.65354e-29
SNRPD1	53.3531	-1.9451	0.168145	-11.568	5.9889e-31	2.68173e-29
TPI1	399.543	-2.8868	0.249667	-11.5626	6.3751e-31	2.84765e-29
AP2S1	46.6589	-2.58419	0.223581	-11.5582	6.71292e-31	2.9912e-29
HAX1	62.8388	-1.70636	0.147742	-11.5496	7.41871e-31	3.29761e-29
NOP53	89.7793	-2.79114	0.241748	-11.5457	7.76487e-31	3.44306e-29
NDUFA5	233.366	-1.90999	0.165451	-11.5442	7.90056e-31	3.4947e-29
MRPS24	49.8573	-2.95423	0.255946	-11.5424	8.06303e-31	3.55791e-29
PSMD7	63.8374	-1.20217	0.104161	-11.5415	8.14672e-31	3.58614e-29
ATOX1	31.3568	-2.13981	0.185406	-11.5412	8.17697e-31	3.59076e-29
PCSK2	19.4633	-3.78258	0.327801	-11.5392	8.36692e-31	3.66532e-29
GUK1	1949.28	-1.90555	0.165214	-11.5338	8.91051e-31	3.89406e-29
RPL27	204.591	-3.38051	0.293101	-11.5336	8.93567e-31	3.8957e-29
RHEB	102.248	-1.79471	0.155635	-11.5315	9.15293e-31	3.98087e-29
SLIRP	255.124	-1.41917	0.12309	-11.5295	9.36418e-31	4.06303e-29
UQCRC1	102.538	-1.35178	0.117249	-11.5291	9.41285e-31	4.07442e-29
LDHB	185.786	-2.35131	0.203964	-11.5281	9.52518e-31	4.11325e-29
LAMTOR5	121.23	-2.95246	0.256437	-11.5134	1.12935e-30	4.86532e-29
GADD45A	17.409	-3.24337	0.281715	-11.5129	1.1354e-30	4.87981e-29
ATF4	93.1177	-2.20101	0.191192	-11.512	1.14779e-30	4.92143e-29
C1orf54	13.5499	-2.67031	0.231992	-11.5104	1.16957e-30	5.00303e-29
GOLGA8A	364.46	2.09698	0.182287	11.5037	1.26334e-30	5.39143e-29
ELOF1	20.374	-2.05977	0.17925	-11.4911	1.46274e-30	6.22779e-29
CEP70	448.202	0.990673	0.0862745	11.4828	1.60973e-30	6.83757e-29
TOMM22	24.6471	-2.99969	0.261315	-11.4792	1.67818e-30	7.11174e-29
AL353759.1	3.01415	-4.94357	0.430765	-11.4763	1.73608e-30	7.34e-29
ATP6V0D1	68.0389	-1.27274	0.110909	-11.4756	1.75032e-30	7.38301e-29
SESN2	6.34412	-3.91647	0.341346	-11.4736	1.79052e-30	7.53511e-29
RTBDN	508.583	-2.79742	0.243883	-11.4703	1.85971e-30	7.8082e-29
TAF7	91.2787	-1.84465	0.160839	-11.4689	1.8906e-30	7.9196e-29
PSMC1	69.4958	-1.23253	0.107493	-11.4662	1.9511e-30	8.15427e-29
MAPRE2	209.835	-0.967553	0.0843989	-11.464	1.99945e-30	8.33716e-29
DTNBP1	205.803	-0.924504	0.0806819	-11.4586	2.12837e-30	8.8544e-29
EID1	249.954	-2.21168	0.19303	-11.4577	2.15248e-30	8.93427e-29
UAP1	32.0775	-1.41785	0.123766	-11.4559	2.19704e-30	9.09843e-29
RPS20	259.783	-3.22101	0.281543	-11.4406	2.62177e-30	1.08327e-28
MRPS21	106.31	-1.53064	0.133916	-11.4298	2.96859e-30	1.22379e-28
MRPS33	38.6869	-2.10039	0.184035	-11.413	3.60107e-30	1.48117e-28
PLCG2	8.36726	-3.18719	0.279298	-11.4114	3.66686e-30	1.50482e-28
TMEM50A	73.412	-1.32606	0.11629	-11.4031	4.0357e-30	1.65246e-28
DUSP26	80.0476	-1.51045	0.132506	-11.399	4.22712e-30	1.72694e-28
SARS	74.0935	-1.19534	0.104901	-11.3949	4.43184e-30	1.80652e-28
DHPS	72.7045	-1.60513	0.140908	-11.3913	4.62156e-30	1.87964e-28
BCAP31	43.9467	-2.19003	0.19228	-11.3898	4.70071e-30	1.90757e-28
HNRNPM	264.867	-0.802178	0.070455	-11.3857	4.9282e-30	1.99543e-28
BRD2	59.2735	-1.51194	0.132802	-11.3849	4.97208e-30	2.00872e-28
PSMA4	49.1847	-2.18322	0.191781	-11.3839	5.03072e-30	2.0279e-28
C14orf119	32.0275	-2.12288	0.186645	-11.3739	5.64215e-30	2.26934e-28
GTF2H5	75.103	-1.72484	0.151675	-11.372	5.76722e-30	2.31453e-28
SSB	98.6808	-1.31251	0.115451	-11.3685	5.99904e-30	2.40226e-28
ZNF780B	428.792	0.986389	0.0867789	11.3667	6.12674e-30	2.448e-28
TUSC2	36.1495	-2.14879	0.189054	-11.366	6.17559e-30	2.4595e-28
SAP18	86.7278	-2.64249	0.232493	-11.3659	6.18257e-30	2.4595e-28
H2AFZ	168.432	-2.29101	0.201715	-11.3577	6.79353e-30	2.69664e-28
RPS5	252.512	-3.24484	0.285702	-11.3574	6.81188e-30	2.69804e-28
CSTB	60.7631	-2.31995	0.204313	-11.3549	7.01068e-30	2.77074e-28
ZNF428	96.4317	-1.51695	0.133709	-11.3451	7.84208e-30	3.0926e-28
ZFAND2A	16.0782	-2.02118	0.178275	-11.3374	8.56457e-30	3.37021e-28
DCTN2	78.5105	-1.30319	0.114983	-11.3337	8.9311e-30	3.50686e-28
TCEAL9	46.9125	-2.16325	0.190928	-11.3301	9.30538e-30	3.64594e-28
COX6C	311.973	-3.15835	0.278761	-11.3299	9.32605e-30	3.64618e-28
C9orf78	25.2913	-1.95684	0.172752	-11.3275	9.59562e-30	3.74353e-28
SPATA2L	16.7728	-1.96113	0.173174	-11.3246	9.90814e-30	3.85717e-28
PAXBP1	308.683	1.16876	0.103208	11.3243	9.94313e-30	3.86253e-28
MRPL18	53.7409	-1.94984	0.172189	-11.3238	9.99906e-30	3.87597e-28
ATP1A3	267.226	-1.31665	0.116337	-11.3175	1.07464e-29	4.15679e-28
BCL10	14.5557	-2.29979	0.203215	-11.3171	1.08043e-29	4.17031e-28
G6PD	39.8383	-1.65562	0.146321	-11.315	1.10631e-29	4.26115e-28
EEF1G	247.582	-3.57578	0.316519	-11.2972	1.35461e-29	5.20649e-28
ARL2	63.1413	-2.37128	0.209907	-11.2968	1.36078e-29	5.21918e-28
PET100	113.989	-2.76004	0.244368	-11.2946	1.39576e-29	5.34208e-28
RPL36AL	106.478	-2.91944	0.259024	-11.2709	1.82691e-29	6.97755e-28
RNF7	68.7514	-1.96611	0.17459	-11.2613	2.03704e-29	7.76382e-28
DNAJC8	99.6092	-1.74938	0.155376	-11.259	2.09091e-29	7.95244e-28
MRPL54	62.9632	-2.11811	0.188159	-11.257	2.13857e-29	8.11675e-28
KPNA2	27.391	-1.70219	0.151298	-11.2506	2.30117e-29	8.71568e-28
SNRPB	30.3326	-1.87692	0.166879	-11.2472	2.39117e-29	9.03774e-28
RAB5C	44.5765	-1.44157	0.12822	-11.2429	2.51074e-29	9.46996e-28
RPL8	410.05	-3.27527	0.291444	-11.2381	2.65129e-29	9.97939e-28
SNRPA	32.1893	-2.53056	0.22542	-11.226	3.03923e-29	1.14159e-27
SAMSN1	14.5916	-3.73886	0.333268	-11.2188	3.29775e-29	1.23615e-27
PARK7	191.258	-2.68138	0.239283	-11.2059	3.81644e-29	1.42763e-27
RGS2	11.8462	-4.09433	0.365634	-11.1979	4.17561e-29	1.55878e-27
TRMT112	66.5967	-3.0672	0.273966	-11.1955	4.28828e-29	1.59756e-27
SRP9	136.392	-2.02514	0.180944	-11.1921	4.45854e-29	1.65759e-27
SUPT4H1	19.5931	-2.46235	0.220061	-11.1894	4.59627e-29	1.70531e-27
SLC25A4	177.061	-2.24403	0.200772	-11.177	5.28195e-29	1.95572e-27
EEF1A1	1276.15	-3.49185	0.312481	-11.1746	5.43048e-29	2.00663e-27
SERPINF1	257.307	-1.5487	0.138652	-11.1697	5.73836e-29	2.11609e-27
ARF6	16.4671	-2.42445	0.217166	-11.1641	6.11356e-29	2.24989e-27
LAGE3	14.591	-2.82359	0.253068	-11.1574	6.58569e-29	2.41874e-27
ACTB	158.045	-2.68746	0.240966	-11.1528	6.93697e-29	2.54262e-27
SMIM26	55.7359	-2.54153	0.227927	-11.1506	7.10902e-29	2.60044e-27
HINT1	184.106	-2.54023	0.227853	-11.1486	7.27804e-29	2.65692e-27
CLTA	151.107	-1.55744	0.139709	-11.1477	7.34545e-29	2.67616e-27
HKDC1	24.8985	-5.95838	0.534923	-11.1388	8.12428e-29	2.95399e-27
HSP90AA1	1300.22	-2.08154	0.187066	-11.1273	9.23721e-29	3.35195e-27
SSR2	37.4077	-1.84431	0.165788	-11.1245	9.53653e-29	3.45367e-27
PCBD1	36.5827	-2.2106	0.198755	-11.1222	9.78233e-29	3.53564e-27
CHMP5	80.683	-1.86208	0.167499	-11.117	1.03708e-28	3.74088e-27
RNF167	51.404	-1.43217	0.128873	-11.113	1.08417e-28	3.903e-27
HNRNPF	123.873	-1.20802	0.108715	-11.1118	1.09927e-28	3.94955e-27
SMDT1	104.681	-2.71201	0.244142	-11.1083	1.14281e-28	4.0979e-27
TXN2	46.0948	-1.75691	0.158169	-11.1078	1.14932e-28	4.11312e-27
CISD1	114.232	-1.64275	0.147905	-11.1068	1.16238e-28	4.1517e-27
APLP2	558.634	-1.21564	0.109505	-11.1012	1.23723e-28	4.41035e-27
DFFB	224.103	1.52917	0.137896	11.0893	1.41335e-28	5.02832e-27
POLR2K	62.6843	-2.71019	0.244403	-11.0891	1.41785e-28	5.03448e-27
EIF3F	79.408	-1.95122	0.175986	-11.0873	1.44544e-28	5.12244e-27
FTX	2550.39	0.711181	0.0641615	11.0842	1.49635e-28	5.29254e-27
EIF2S2	91.749	-1.21683	0.109783	-11.084	1.50099e-28	5.29865e-27
RPL36	271.892	-3.30884	0.298653	-11.0792	1.58261e-28	5.57594e-27
PRKAR1A	98.0158	-1.05631	0.0953917	-11.0734	1.68821e-28	5.93651e-27
KIAA0355	192.628	-1.14009	0.103028	-11.0658	1.8382e-28	6.45145e-27
NTNG2	429.316	0.948004	0.0857263	11.0585	1.99412e-28	6.98519e-27
BRK1	58.8622	-1.82703	0.165255	-11.0558	2.05418e-28	7.18174e-27
CTSA	37.4149	-1.45966	0.132031	-11.0554	2.06421e-28	7.20296e-27
BSCL2	77.6543	-1.45748	0.131864	-11.0529	2.12179e-28	7.38969e-27
GABARAPL2	219.759	-2.66065	0.240762	-11.0509	2.16971e-28	7.54212e-27
TLE4	200.81	-1.23022	0.111346	-11.0485	2.22806e-28	7.73018e-27
SUMO3	43.816	-2.65188	0.240059	-11.0468	2.27187e-28	7.86715e-27
GHITM	129.108	-2.5566	0.231572	-11.0402	2.44516e-28	8.45114e-27
SAT1	87.4376	-1.76492	0.159887	-11.0386	2.48945e-28	8.58788e-27
GPAA1	41.3858	-1.74683	0.158269	-11.0371	2.53175e-28	8.71727e-27
PSMB6	62.7715	-2.6975	0.244413	-11.0366	2.54398e-28	8.74282e-27
OS9	88.1042	-1.09659	0.0993855	-11.0337	2.62967e-28	9.02025e-27
FMN1	5351.78	0.763923	0.0692803	11.0265	2.84585e-28	9.74343e-27
RAN	88.3217	-2.61002	0.23675	-11.0244	2.91503e-28	9.96152e-27
PSMB7	124.639	-0.943681	0.0856216	-11.0215	3.00927e-28	1.02643e-26
SRI	31.4857	-2.37921	0.216003	-11.0147	3.24646e-28	1.10526e-26
MRPS18B	63.2425	-1.39069	0.12635	-11.0066	3.55041e-28	1.20647e-26
FAU	339.759	-3.21473	0.292168	-11.003	3.69522e-28	1.25334e-26
ADI1	27.8593	-2.10327	0.191221	-10.9992	3.85622e-28	1.30551e-26
NAA10	26.3011	-1.85243	0.168451	-10.9968	3.95781e-28	1.33741e-26
SNHG6	317.942	-2.49748	0.22717	-10.9939	4.08948e-28	1.37935e-26
POLR2I	51.6662	-3.15593	0.287141	-10.9909	4.22789e-28	1.42339e-26
NT5C3A	199.697	-0.768776	0.0699748	-10.9865	4.43931e-28	1.4918e-26
DCAF7	243.001	-0.677537	0.0617092	-10.9795	4.79549e-28	1.60853e-26
HDDC2	48.3632	-1.99643	0.1819	-10.9754	5.01697e-28	1.67971e-26
GNB3	1600.78	-1.38421	0.126143	-10.9733	5.13589e-28	1.71637e-26
GPX4	227.944	-2.52013	0.229753	-10.9689	5.39531e-28	1.79976e-26
PLK3	3.22344	-4.45058	0.405896	-10.9648	5.64094e-28	1.87825e-26
AC100810.1	21.4041	-1.96249	0.179059	-10.96	5.94764e-28	1.97675e-26
RFK	33.4911	-2.49381	0.227778	-10.9485	6.75918e-28	2.24237e-26
SIAH2	14.2958	-2.31554	0.21156	-10.9451	7.01735e-28	2.32378e-26
HMGN2	334.25	-1.50562	0.137566	-10.9447	7.04247e-28	2.32786e-26
SRP14	324.875	-2.7825	0.254282	-10.9426	7.21074e-28	2.37915e-26
UBB	294.84	-3.1948	0.291984	-10.9417	7.28375e-28	2.39889e-26
EEF2	144.928	-2.72055	0.248683	-10.9398	7.43413e-28	2.44399e-26
RPS13	345.181	-3.44344	0.314932	-10.9339	7.93652e-28	2.60444e-26
SVIP	46.34	-1.58991	0.145444	-10.9314	8.15679e-28	2.6719e-26
RPS3	393.489	-3.01452	0.2758	-10.9301	8.27595e-28	2.70606e-26
HSPD1	125.299	-1.59744	0.146181	-10.9279	8.48285e-28	2.75882e-26
NR4A1	20.2542	-3.14415	0.287713	-10.9281	8.46454e-28	2.75882e-26
NAA20	61.6865	-1.60584	0.146949	-10.9279	8.4808e-28	2.75882e-26
CHCHD2	318.639	-2.5994	0.237881	-10.9273	8.53784e-28	2.77175e-26
NDUFS5	150.796	-3.09183	0.282992	-10.9255	8.7054e-28	2.82111e-26
ZDHHC4	21.6303	-1.92525	0.176247	-10.9236	8.89137e-28	2.87625e-26
PSMD4	79.3584	-1.24862	0.114307	-10.9234	8.91129e-28	2.87757e-26
SIVA1	36.3319	-1.62537	0.14884	-10.9203	9.22201e-28	2.97263e-26
LAPTM4A	26.6553	-1.81973	0.166688	-10.917	9.56428e-28	3.0775e-26
MKNK2	36.1863	-1.47299	0.134941	-10.9158	9.68408e-28	3.11054e-26
ISCA1	56.9379	-1.48877	0.136483	-10.9081	1.05474e-27	3.38186e-26
MXD1	74.723	-1.06904	0.0980143	-10.9069	1.06783e-27	3.41781e-26
AURKAIP1	90.5376	-2.72152	0.24966	-10.9009	1.14083e-27	3.64504e-26
LSM4	63.6638	-2.36857	0.217354	-10.8973	1.18714e-27	3.78635e-26
IFI27L2	112.676	-2.46	0.225762	-10.8964	1.19901e-27	3.8175e-26
ATP6V1E1	82.8128	-1.47311	0.135269	-10.8902	1.28306e-27	4.07799e-26
PSMA6	102.798	-0.903583	0.083009	-10.8854	1.35374e-27	4.2951e-26
AAMP	40.1495	-1.60823	0.147747	-10.885	1.35913e-27	4.29831e-26
COX6A1	313.973	-3.55099	0.326229	-10.885	1.35948e-27	4.29831e-26
MGST3	300.447	-1.60399	0.147396	-10.8822	1.40145e-27	4.42332e-26
RPS7	470.752	-3.01623	0.277305	-10.877	1.4842e-27	4.6764e-26
SMIM29	25.8742	-2.19577	0.202042	-10.8679	1.63959e-27	5.15704e-26
DGCR6L	20.6837	-2.37323	0.218505	-10.8612	1.76464e-27	5.54078e-26
MRPL34	73.0335	-1.65085	0.151999	-10.8609	1.76962e-27	5.54684e-26
CCDC191	237.507	0.980207	0.0902946	10.8556	1.87469e-27	5.86607e-26
POLR2J	30.5887	-2.68042	0.246922	-10.8554	1.88083e-27	5.87516e-26
MYL12B	78.8424	-2.48263	0.228867	-10.8475	2.05004e-27	6.39274e-26
ARL6IP4	95.6973	-1.66867	0.153867	-10.8449	2.10907e-27	6.56556e-26
TMEM11	32.7458	-1.65661	0.152784	-10.8428	2.15795e-27	6.70624e-26
ZNHIT3	35.1363	-1.40948	0.130014	-10.841	2.20124e-27	6.82911e-26
MEAF6	61.9545	-1.2811	0.118218	-10.8368	2.30477e-27	7.13811e-26
STRN3	298.312	0.789216	0.0728327	10.836	2.32391e-27	7.18516e-26
NFKBIA	21.3265	-2.14356	0.197849	-10.8343	2.36663e-27	7.30482e-26
CETN3	50.3982	-1.35945	0.125554	-10.8276	2.54612e-27	7.84549e-26
YIPF3	64.4092	-1.61286	0.148967	-10.827	2.56558e-27	7.87876e-26
BUD23	64.881	-1.11728	0.103194	-10.827	2.56301e-27	7.87876e-26
RPS19	326.294	-3.09271	0.285683	-10.8257	2.60135e-27	7.97513e-26
RAB2A	217.623	-0.661187	0.0611383	-10.8146	2.93522e-27	8.98356e-26
IER3IP1	82.7714	-1.59477	0.147509	-10.8113	3.04337e-27	9.29891e-26
GPX3	207.897	-4.5996	0.425495	-10.81	3.08628e-27	9.41419e-26
CECR2	1560.61	0.749855	0.0693698	10.8095	3.10254e-27	9.44795e-26
TBL1XR1	678.147	0.804184	0.0744187	10.8062	3.21714e-27	9.78054e-26
AP001160.1	9.9923	-2.07213	0.191914	-10.7972	3.54929e-27	1.07723e-25
PDHB	38.0014	-1.33947	0.124251	-10.7804	4.26253e-27	1.29155e-25
DDOST	54.9516	-1.22516	0.113652	-10.7799	4.28461e-27	1.29608e-25
SMAD2	1021.81	0.800479	0.0742644	10.7788	4.3363e-27	1.30954e-25
RPS2	291.997	-3.30021	0.306269	-10.7756	4.49089e-27	1.35397e-25
ELOVL5	100.533	-1.03011	0.0956186	-10.7731	4.61307e-27	1.3885e-25
BANF1	52.1344	-2.48862	0.231086	-10.7692	4.81038e-27	1.4455e-25
PSMC5	59.8271	-2.27172	0.21098	-10.7675	4.90293e-27	1.47088e-25
PRPF19	26.6489	-1.51842	0.141027	-10.7669	4.93244e-27	1.47729e-25
IFI27	19.8622	-2.01886	0.187518	-10.7662	4.97008e-27	1.48612e-25
COPS6	101.271	-1.32447	0.123038	-10.7647	5.05032e-27	1.50763e-25
PCBP2	258.329	-1.08874	0.101161	-10.7625	5.17459e-27	1.5422e-25
METTL9	143.748	-1.07024	0.099444	-10.7622	5.19103e-27	1.54457e-25
RASA1	340.238	0.665462	0.0618698	10.7558	5.56194e-27	1.65222e-25
TRAM1	49.8525	-1.3058	0.121433	-10.7533	5.71743e-27	1.69564e-25
MCL1	30.5752	-1.45844	0.135755	-10.7431	6.3831e-27	1.88998e-25
TMBIM6	196.87	-1.39721	0.130067	-10.7423	6.44205e-27	1.90433e-25
TUBB	88.8983	-2.64152	0.245915	-10.7416	6.48996e-27	1.91538e-25
ILF2	37.5119	-1.5657	0.145809	-10.7381	6.74374e-27	1.98705e-25
HSPH1	107.243	-2.52042	0.234746	-10.7368	6.83727e-27	2.01135e-25
NDUFB10	84.3677	-2.89302	0.269511	-10.7343	7.0236e-27	2.06283e-25
CKB	3098.93	-1.96564	0.18312	-10.7342	7.0353e-27	2.06293e-25
ZDHHC2	605.024	0.689003	0.0642926	10.7167	8.50118e-27	2.48875e-25
AVPI1	14.2852	-2.11501	0.197373	-10.7158	8.57802e-27	2.50721e-25
TCP1	44.1939	-1.71634	0.160371	-10.7023	9.92295e-27	2.89565e-25
DNPH1	18.1384	-2.40736	0.224967	-10.7009	1.00788e-26	2.93642e-25
AFF1	2757.21	0.705122	0.06593	10.695	1.07411e-26	3.12436e-25
RPL15	413.566	-3.44308	0.322068	-10.6905	1.12729e-26	3.27381e-25
DNAJA4	28.022	-2.10852	0.197275	-10.6883	1.15528e-26	3.34977e-25
BEX3	93.8694	-2.2194	0.207662	-10.6876	1.16352e-26	3.36829e-25
CCT2	72.6492	-1.30854	0.122447	-10.6866	1.17571e-26	3.39817e-25
PSMB1	116.205	-1.8199	0.170349	-10.6834	1.21748e-26	3.5133e-25
GALM	16.1966	-2.19937	0.205927	-10.6804	1.25757e-26	3.62325e-25
AKR7A2	32.1032	-1.59535	0.149378	-10.68	1.2631e-26	3.63342e-25
PPP1R7	60.2527	-1.42636	0.133583	-10.6777	1.29476e-26	3.71275e-25
AMZ2	23.8096	-1.51935	0.142292	-10.6777	1.29428e-26	3.71275e-25
IDH1	39.4358	-1.28667	0.120582	-10.6705	1.39879e-26	4.00473e-25
SNHG5	138.288	-1.18758	0.111368	-10.6636	1.5063e-26	4.30574e-25
CYCS	184.505	-2.53971	0.238211	-10.6616	1.53906e-26	4.39248e-25
NFU1	82.5852	-0.857079	0.0804033	-10.6597	1.5703e-26	4.47462e-25
MDH2	78.956	-1.71439	0.160839	-10.6591	1.58204e-26	4.50102e-25
DHRS7	305.34	-1.46397	0.137348	-10.6588	1.58628e-26	4.50603e-25
TXN	47.9642	-2.7848	0.261491	-10.6497	1.74944e-26	4.96174e-25
PSENEN	28.881	-2.50674	0.235698	-10.6354	2.03978e-26	5.7762e-25
ZNF503	10.0197	-2.50636	0.235864	-10.6263	2.24808e-26	6.35615e-25
MYL12A	30.3752	-2.02858	0.190947	-10.6238	2.31015e-26	6.52151e-25
AC211476.2	72.6205	2.01492	0.189686	10.6223	2.34581e-26	6.6119e-25
PSMA1	71.4945	-1.38566	0.130456	-10.6216	2.36355e-26	6.6516e-25
ADGRV1	2400.5	0.933709	0.0879422	10.6173	2.47631e-26	6.95815e-25
MED19	62.0876	-1.19682	0.11278	-10.612	2.62161e-26	7.35507e-25
MYDGF	35.1442	-1.64549	0.155073	-10.6111	2.64697e-26	7.41479e-25
NME2	175.889	-2.06813	0.194916	-10.6104	2.66732e-26	7.4603e-25
CALM2	430.57	-2.27151	0.214257	-10.6018	2.92313e-26	8.16322e-25
RPL41	814.331	-3.74556	0.353338	-10.6005	2.96466e-26	8.26648e-25
IFRD1	59.6848	-1.19543	0.112781	-10.5995	2.99456e-26	8.33707e-25
CCDC59	32.3444	-1.32756	0.125263	-10.5982	3.0376e-26	8.44397e-25
MIR7-3HG	12.7655	-2.54937	0.240631	-10.5945	3.15983e-26	8.77034e-25
TOMM6	68.6111	-2.89867	0.27361	-10.5942	3.17102e-26	8.78798e-25
GATAD1	151.534	1.14998	0.10858	10.5911	3.27709e-26	9.0681e-25
RPS14	423.191	-3.26555	0.308567	-10.583	3.57467e-26	9.87651e-25
ECHS1	43.8941	-1.99383	0.18845	-10.5802	3.68298e-26	1.01603e-24
MRPS18C	52.6176	-1.29655	0.122598	-10.5756	3.86508e-26	1.06465e-24
DCTN3	67.2762	-2.51522	0.237895	-10.5728	3.98358e-26	1.09564e-24
RPL37	185.27	-2.84083	0.268785	-10.5692	4.14111e-26	1.13724e-24
NDUFAB1	140.508	-2.06345	0.195303	-10.5654	4.3109e-26	1.18209e-24
ABHD3	62.9514	-2.37407	0.224802	-10.5607	4.53212e-26	1.24087e-24
AP000857.2	201.561	1.93681	0.18343	10.5588	4.62308e-26	1.26387e-24
CLPTM1	57.6652	-1.11624	0.105757	-10.5548	4.8268e-26	1.31759e-24
C1QBP	76.8716	-2.36793	0.224354	-10.5544	4.84576e-26	1.32078e-24
RNF6	48.0197	-1.68356	0.159523	-10.5537	4.88314e-26	1.32897e-24
SELENOK	264.628	-2.63129	0.249376	-10.5515	4.99954e-26	1.35862e-24
MRPL51	44.9223	-2.48913	0.235953	-10.5493	5.12003e-26	1.38929e-24
IDH3G	36.8414	-1.85632	0.175994	-10.5476	5.2102e-26	1.41165e-24
RSL24D1	56.9529	-2.14485	0.203357	-10.5472	5.23209e-26	1.41547e-24
EIF1AX	131.348	-1.78044	0.16886	-10.5438	5.42471e-26	1.4654e-24
NR4A3	5.76852	-4.35878	0.413408	-10.5435	5.44096e-26	1.46761e-24
CCDC47	59.6751	-1.03621	0.0982815	-10.5433	5.45532e-26	1.4693e-24
TMED9	59.1832	-1.95581	0.185581	-10.5388	5.72039e-26	1.53841e-24
ARHGAP28	245.936	1.06729	0.101318	10.5341	6.01425e-26	1.61505e-24
TALDO1	46.3607	-1.64518	0.156222	-10.531	6.21567e-26	1.66668e-24
WDR83OS	46.9459	-2.19114	0.208084	-10.5301	6.27757e-26	1.6808e-24
RPL13	595.449	-3.02294	0.287151	-10.5274	6.46231e-26	1.72772e-24
SRSF3	113.152	-1.70795	0.162251	-10.5265	6.51881e-26	1.74027e-24
SNRPE	41.2023	-2.20496	0.209546	-10.5225	6.80203e-26	1.81321e-24
PRR13	22.4208	-1.74921	0.166385	-10.513	7.52721e-26	2.00358e-24
SPON1	16.3633	-2.98214	0.283673	-10.5126	7.55775e-26	2.00877e-24
SELENOF	193.788	-1.12446	0.10699	-10.5099	7.77595e-26	2.06375e-24
GABRG3	20.9072	-5.10024	0.48555	-10.5041	8.275e-26	2.193e-24
PCP4	618.264	-3.55436	0.338401	-10.5034	8.33461e-26	2.20558e-24
HSPA5	52.4158	-2.38217	0.22683	-10.502	8.4536e-26	2.23381e-24
FAAP20	37.1347	-1.45669	0.138708	-10.5019	8.46975e-26	2.23483e-24
ALKBH5	122.813	-1.23952	0.118138	-10.4921	9.38874e-26	2.47373e-24
ZNF10	138.681	-1.13378	0.108063	-10.4918	9.42081e-26	2.47859e-24
PEA15	164.481	-1.59003	0.151646	-10.4851	1.011e-25	2.65607e-24
ZNF532	208.113	1.06915	0.101984	10.4836	1.02806e-25	2.697e-24
ABCB11	5.42867	-4.97516	0.474774	-10.479	1.07865e-25	2.82563e-24
SNHG8	61.042	-2.0015	0.191039	-10.477	1.10236e-25	2.88359e-24
MRPL24	23.1101	-1.72349	0.164605	-10.4704	1.18089e-25	3.08455e-24
AUP1	36.8084	-1.4988	0.143219	-10.4651	1.24918e-25	3.25825e-24
WDR61	97.808	-1.26506	0.120905	-10.4633	1.27374e-25	3.31757e-24
DPM3	38.3955	-1.83029	0.17494	-10.4624	1.28557e-25	3.3388e-24
SLC25A11	47.9904	-1.74776	0.167051	-10.4624	1.28521e-25	3.3388e-24
POP4	16.9083	-2.05746	0.196747	-10.4574	1.35555e-25	3.51554e-24
ITGAE	34.1317	-1.57364	0.150675	-10.4439	1.56235e-25	4.04607e-24
CCNI	320.968	-1.62582	0.155765	-10.4376	1.66938e-25	4.31711e-24
POLE4	185.417	-1.57991	0.1514	-10.4353	1.71084e-25	4.41806e-24
TOMM7	216.954	-3.13992	0.300955	-10.4332	1.74908e-25	4.51039e-24
RAB11B	45.5417	-1.57841	0.151348	-10.429	1.8274e-25	4.70568e-24
AC020661.3	27.2002	-1.79409	0.172065	-10.4269	1.86973e-25	4.80787e-24
RPLP0	334.225	-2.84268	0.272702	-10.4241	1.92388e-25	4.94014e-24
FHOD3	1879.15	0.916725	0.0879448	10.4239	1.92943e-25	4.94741e-24
CTSD	57.7943	-2.04419	0.196279	-10.4147	2.12435e-25	5.43953e-24
TSG101	89.0335	-0.777755	0.0746957	-10.4123	2.1787e-25	5.57084e-24
NELFE	27.8407	-1.37697	0.132251	-10.4118	2.19077e-25	5.59384e-24
CA11	54.4363	-1.78019	0.171052	-10.4073	2.29535e-25	5.85267e-24
EI24	36.7903	-1.43253	0.13767	-10.4055	2.34005e-25	5.95829e-24
MRPL43	51.5525	-1.40707	0.135289	-10.4005	2.46636e-25	6.27112e-24
MED31	38.8329	-1.26115	0.121324	-10.3949	2.61493e-25	6.63959e-24
RNF11	154.516	-0.81154	0.0780861	-10.3929	2.6716e-25	6.77402e-24
TARS	51.7012	-1.02941	0.0990961	-10.388	2.81181e-25	7.1196e-24
DCXR	25.7244	-2.36993	0.228156	-10.3873	2.8322e-25	7.16126e-24
RPL11	437.151	-2.81067	0.2706	-10.3868	2.84693e-25	7.18849e-24
GDE1	27.5082	-1.4314	0.137938	-10.3771	3.15185e-25	7.94739e-24
PDIA6	67.8239	-1.20613	0.116237	-10.3764	3.17414e-25	7.99251e-24
MRPL27	59.2231	-1.34631	0.129793	-10.3727	3.30013e-25	8.29826e-24
POLR2A	172.353	-1.70864	0.164844	-10.3652	3.57193e-25	8.96929e-24
SMIM27	35.1718	-1.66339	0.160569	-10.3594	3.79463e-25	9.51535e-24
AC108449.1	111.794	2.01537	0.194569	10.3581	3.84416e-25	9.62627e-24
PHB	40.5482	-2.03604	0.196731	-10.3494	4.21096e-25	1.05303e-23
COPS3	47.7948	-1.11373	0.107682	-10.3427	4.51534e-25	1.12759e-23
DNAJC19	60.2061	-1.43922	0.139164	-10.3419	4.55555e-25	1.13608e-23
RPS16	371.053	-3.03962	0.293991	-10.3391	4.68705e-25	1.16727e-23
USP11	66.9818	-1.2448	0.120421	-10.3371	4.78981e-25	1.19123e-23
NPHS1	5.20215	-4.31411	0.417652	-10.3294	5.18637e-25	1.28809e-23
RPL38	221.545	-3.20509	0.310423	-10.3249	5.43689e-25	1.34847e-23
PFDN4	27.9954	-1.90663	0.184678	-10.3241	5.48514e-25	1.35858e-23
FUNDC2	43.3707	-1.72343	0.166979	-10.3212	5.64919e-25	1.39731e-23
MRPL13	52.3088	-1.43314	0.13886	-10.3208	5.67757e-25	1.40242e-23
AC110296.1	6.04127	-4.39397	0.425838	-10.3184	5.81788e-25	1.43513e-23
SEPHS2	31.9017	-1.92451	0.186518	-10.3181	5.83812e-25	1.43817e-23
MPC2	84.621	-2.15427	0.209011	-10.307	6.55439e-25	1.61243e-23
SNRNP27	40.6106	-1.4736	0.142977	-10.3066	6.58122e-25	1.61685e-23
AC010642.2	20.3281	-1.87915	0.182338	-10.3059	6.62924e-25	1.62644e-23
HMOX2	66.1181	-1.2091	0.117343	-10.3039	6.76466e-25	1.65743e-23
PSMD8	66.0571	-1.84878	0.179574	-10.2953	7.39513e-25	1.80947e-23
MIR4458HG	34.1355	-2.05313	0.199442	-10.2944	7.4711e-25	1.8256e-23
TMEM14A	42.5411	-2.13254	0.207161	-10.2941	7.48937e-25	1.82761e-23
RPSA	243.611	-2.91763	0.283492	-10.2917	7.67788e-25	1.8711e-23
AC012146.1	5.67092	-2.71711	0.264212	-10.2838	8.33566e-25	2.02868e-23
ACP1	67.2756	-1.50897	0.146807	-10.2786	8.79865e-25	2.1385e-23
SMIM15	18.0087	-2.36434	0.230184	-10.2716	9.46688e-25	2.29784e-23
H3F3A	347.098	-2.42412	0.236013	-10.2712	9.50606e-25	2.3012e-23
GSTP1	135.003	-3.13084	0.304818	-10.2712	9.50358e-25	2.3012e-23
MRPS12	21.4288	-2.11166	0.205784	-10.2615	1.05014e-24	2.53878e-23
NFIB	23.9704	-3.13112	0.30514	-10.2613	1.05307e-24	2.54248e-23
RPL14	273.017	-2.87696	0.280481	-10.2572	1.09806e-24	2.64758e-23
PRADC1	34.3409	-1.86743	0.182094	-10.2553	1.1201e-24	2.69714e-23
ISOC2	12.8519	-2.41037	0.235071	-10.2538	1.13786e-24	2.73629e-23
WBP11	93.7531	-0.897273	0.0875702	-10.2463	1.22924e-24	2.95211e-23
HSPB11	35.1085	-1.35133	0.1319	-10.2451	1.24507e-24	2.98619e-23
TRPM1	28.8042	-4.34962	0.425223	-10.229	1.46971e-24	3.52034e-23
RBM33	250.113	0.979265	0.0957711	10.225	1.53149e-24	3.66349e-23
RPL10A	183.296	-3.11632	0.304926	-10.2199	1.61467e-24	3.85737e-23
FIS1	48.5499	-2.41342	0.236172	-10.2189	1.6317e-24	3.89295e-23
BZW1	30.2985	-1.50986	0.147768	-10.2178	1.65129e-24	3.93453e-23
RPL27A	450.855	-3.07669	0.301154	-10.2163	1.67579e-24	3.98768e-23
SERBP1	145.063	-1.11155	0.108879	-10.2091	1.8062e-24	4.29238e-23
HSPA4	220.675	-1.04524	0.102396	-10.2079	1.82839e-24	4.33945e-23
AL162231.1	14.66	-2.2175	0.217253	-10.207	1.84433e-24	4.37156e-23
CTSF	48.9954	-1.73254	0.169754	-10.2062	1.85997e-24	4.40291e-23
HSPBP1	23.1952	-1.56953	0.153821	-10.2036	1.91046e-24	4.51654e-23
SF3B5	39.8068	-2.29014	0.22471	-10.1916	2.16257e-24	5.10591e-23
VTI1B	125.163	-0.926889	0.0909644	-10.1896	2.20728e-24	5.20471e-23
PNKD	48.3989	-1.79268	0.175942	-10.189	2.21959e-24	5.22695e-23
ASAH1	110.604	-1.28936	0.126611	-10.1836	2.34666e-24	5.51905e-23
CREB1	220.155	0.723369	0.0710574	10.1801	2.4339e-24	5.71683e-23
AC012447.1	8.17019	-2.2917	0.225143	-10.1789	2.46429e-24	5.78074e-23
PPIA	150.483	-2.56349	0.251998	-10.1726	2.62715e-24	6.15484e-23
DDT	65.6254	-2.67605	0.263084	-10.1718	2.64834e-24	6.1965e-23
RTN4	820.389	-1.61677	0.15896	-10.1709	2.67311e-24	6.24642e-23
PSMD10	13.0487	-2.44297	0.240353	-10.1641	2.86722e-24	6.69142e-23
RPL32	478.75	-3.50435	0.344804	-10.1633	2.89144e-24	6.73929e-23
NDUFB8	305.483	-1.47586	0.145227	-10.1625	2.91607e-24	6.78799e-23
TMED2	54.2981	-1.89527	0.186582	-10.1579	3.05726e-24	7.10755e-23
UBXN1	72.2615	-1.33024	0.131043	-10.1512	3.27359e-24	7.60075e-23
UBE2B	222.312	-0.803834	0.0791996	-10.1495	3.3314e-24	7.72512e-23
IK	79.4522	-1.45954	0.14383	-10.1477	3.39378e-24	7.85972e-23
BCL7B	25.5309	-1.60203	0.157885	-10.1468	3.42466e-24	7.92117e-23
GAPDH	1575.26	-2.88012	0.283909	-10.1445	3.50474e-24	8.09609e-23
CBR1	10.6506	-2.62883	0.259181	-10.1428	3.56555e-24	8.2261e-23
POLR2E	52.9346	-1.29143	0.127328	-10.1426	3.57584e-24	8.23939e-23
STUB1	69.5733	-1.80151	0.177624	-10.1423	3.58668e-24	8.2539e-23
NDUFB3	102.555	-2.6108	0.257497	-10.1392	3.70204e-24	8.5086e-23
LYSMD3	57.8777	-1.05496	0.104068	-10.1372	3.7774e-24	8.67086e-23
ESD	134.326	-1.28635	0.126924	-10.1348	3.87204e-24	8.87689e-23
PABPN1	240.739	1.10344	0.108905	10.1322	3.97777e-24	9.10779e-23
PRDX5	127.051	-3.15681	0.311581	-10.1316	4.00112e-24	9.14972e-23
LBH	743.975	-1.04389	0.103071	-10.1279	4.15381e-24	9.48696e-23
RPS27	474.265	-3.35125	0.330943	-10.1264	4.22084e-24	9.62796e-23
IDI1	87.8223	-1.90406	0.188075	-10.1239	4.32743e-24	9.85873e-23
FAM177A1	106.141	-0.925677	0.0915011	-10.1166	4.66504e-24	1.06146e-22
PLEKHA7	1335.85	0.881175	0.0871933	10.106	5.19679e-24	1.18097e-22
CLGN	11.9702	-2.77256	0.274483	-10.101	5.4667e-24	1.24076e-22
MAF1	23.6065	-1.91823	0.189984	-10.0968	5.70904e-24	1.29414e-22
CENPX	27.2429	-1.93179	0.191345	-10.0959	5.7626e-24	1.30466e-22
SVBP	34.2581	-1.42844	0.141554	-10.0911	6.04924e-24	1.36785e-22
ARL3	458.085	-1.04751	0.103808	-10.0908	6.06595e-24	1.36992e-22
CMTM7	14.3544	-2.07691	0.205831	-10.0904	6.09497e-24	1.37477e-22
ATG3	45.9076	-1.0913	0.10818	-10.0879	6.25021e-24	1.40804e-22
IDH3B	43.2261	-1.55205	0.153863	-10.0872	6.29435e-24	1.41623e-22
PRELID3B	11.3954	-2.30857	0.228914	-10.0849	6.44472e-24	1.44827e-22
UQCRB	393.744	-3.02722	0.300262	-10.0819	6.6408e-24	1.49049e-22
RPS4X	304.612	-3.45405	0.342934	-10.0721	7.3429e-24	1.64604e-22
LAMTOR1	49.1764	-1.88836	0.187579	-10.0671	7.72545e-24	1.72966e-22
RHOC	12.3468	-3.59845	0.357533	-10.0647	7.91521e-24	1.76997e-22
ERP29	100.179	-1.2666	0.125921	-10.0587	8.40879e-24	1.87803e-22
TMEM160	48.5272	-2.48899	0.247525	-10.0555	8.68608e-24	1.93758e-22
SLC25A3	165.194	-1.97234	0.196176	-10.0539	8.826e-24	1.96638e-22
VPS28	83.777	-1.48254	0.14749	-10.0518	9.0205e-24	2.00725e-22
NPTN	384.271	0.739481	0.0735787	10.0502	9.16793e-24	2.03757e-22
EWSR1	115.126	-0.776719	0.0772932	-10.049	9.28085e-24	2.06014e-22
UGDH	70.9043	-1.19333	0.118793	-10.0454	9.62504e-24	2.13394e-22
EIF3M	83.9848	-0.91935	0.0916466	-10.0315	1.10854e-23	2.45473e-22
RPL35	317.431	-3.17916	0.316996	-10.029	1.13635e-23	2.51324e-22
RANBP1	49.2907	-1.7489	0.174418	-10.027	1.15932e-23	2.56093e-22
COQ10B	88.0399	-1.09856	0.109581	-10.0251	1.182e-23	2.60786e-22
FAM120B	453.484	0.893799	0.0891665	10.0239	1.1965e-23	2.63665e-22
NXT1	20.8981	-1.82561	0.182186	-10.0206	1.23808e-23	2.72498e-22
TCEAL4	62.4915	-1.91474	0.191105	-10.0193	1.25362e-23	2.75585e-22
PRAF2	14.0698	-2.02624	0.202241	-10.0189	1.25846e-23	2.76313e-22
LIN37	25.2207	-1.46112	0.145919	-10.0132	1.33351e-23	2.92439e-22
RPE	100.839	1.46364	0.146175	10.0129	1.33764e-23	2.92992e-22
AC239799.2	2.49317	-3.70609	0.370177	-10.0117	1.35461e-23	2.96352e-22
ACTG1	382.205	-1.98175	0.198045	-10.0066	1.42616e-23	3.11629e-22
EEF1B2	79.2861	-2.73769	0.273717	-10.0019	1.49549e-23	3.26386e-22
RPL19	281.471	-3.243	0.324279	-10.0006	1.51417e-23	3.30067e-22
RPL7	432.446	-3.8298	0.38302	-9.99895	1.54023e-23	3.35345e-22
RBM18	30.4613	-1.10931	0.110951	-9.99815	1.55277e-23	3.37672e-22
UROD	17.9093	-1.88218	0.188257	-9.99793	1.55619e-23	3.38012e-22
RPL26L1	18.7718	-2.25879	0.226007	-9.99437	1.61315e-23	3.49966e-22
COA6	26.283	-1.76065	0.176202	-9.99223	1.64826e-23	3.57156e-22
ENOPH1	75.1448	-1.06497	0.106584	-9.9919	1.65376e-23	3.5792e-22
CCT8	74.2178	-1.40669	0.140813	-9.98978	1.68951e-23	3.65224e-22
MRPL41	61.2257	-2.76237	0.276592	-9.98714	1.73514e-23	3.74642e-22
TSPAN3	318.368	-1.39502	0.139714	-9.98478	1.77687e-23	3.83197e-22
CA10	40.2851	-5.25083	0.526264	-9.97757	1.91097e-23	4.11629e-22
AC010976.1	103.381	1.81954	0.182379	9.97667	1.9283e-23	4.14547e-22
UBA52	155.305	-3.13241	0.313974	-9.97663	1.92908e-23	4.14547e-22
ZNF280D	287.133	0.91938	0.0922034	9.97122	2.03708e-23	4.37239e-22
DCAF11	33.7832	-1.14881	0.115269	-9.96638	2.13878e-23	4.58526e-22
MORN2	44.3505	-1.71379	0.171963	-9.96604	2.14609e-23	4.59551e-22
DMTF1	149.034	1.07034	0.107403	9.96566	2.15443e-23	4.60794e-22
CYB5R1	40.2916	-1.57026	0.157604	-9.96337	2.2045e-23	4.70949e-22
RPL21	691.186	-3.43347	0.344737	-9.95969	2.28783e-23	4.88177e-22
ENO2	971.627	-1.90087	0.190894	-9.95777	2.33238e-23	4.971e-22
THOC7	113.547	-1.34639	0.135251	-9.95473	2.4048e-23	5.11936e-22
NAP1L1	175.219	-1.03891	0.104391	-9.95214	2.46825e-23	5.24828e-22
BRIX1	38.6264	-1.49196	0.150064	-9.94214	2.72894e-23	5.79581e-22
DYNLRB1	94.7953	-2.45149	0.246583	-9.94184	2.73727e-23	5.80672e-22
HCFC1R1	35.4246	-2.26704	0.228082	-9.9396	2.79938e-23	5.93155e-22
AC007038.1	177.283	0.937853	0.0943783	9.93716	2.86888e-23	6.07174e-22
TRAPPC3	42.0427	-1.21158	0.12194	-9.93583	2.90738e-23	6.14606e-22
RPS15	458.761	-3.49361	0.351628	-9.93553	2.91613e-23	6.1574e-22
SWI5	56.3017	-1.30494	0.13144	-9.92801	3.14481e-23	6.63255e-22
MFAP1	46.2504	-1.07854	0.108743	-9.91818	3.47042e-23	7.3108e-22
HNRNPK	196.129	-1.45098	0.146356	-9.91401	3.6181e-23	7.61308e-22
CCT6A	74.6485	-1.3771	0.138923	-9.91269	3.66641e-23	7.69693e-22
NKIRAS2	23.1266	-1.47134	0.14843	-9.91271	3.66553e-23	7.69693e-22
ECH1	31.4489	-1.47107	0.148417	-9.91173	3.70195e-23	7.76256e-22
RPL24	332.513	-2.83039	0.285589	-9.91069	3.7406e-23	7.83458e-22
RPL10	548.506	-3.09339	0.312265	-9.90632	3.90774e-23	8.17523e-22
PHPT1	50.392	-2.34352	0.236599	-9.90502	3.95905e-23	8.27305e-22
ARFIP1	315.507	0.681773	0.068833	9.90474	3.9699e-23	8.2862e-22
ZNF248	366.933	0.912586	0.0921448	9.90383	4.00634e-23	8.35266e-22
SSNA1	32.1863	-1.96327	0.198332	-9.89892	4.20809e-23	8.76323e-22
UQCC2	242.967	-1.22842	0.124108	-9.89803	4.24543e-23	8.83088e-22
DUSP23	7.77465	-3.08787	0.311989	-9.89735	4.27456e-23	8.8813e-22
LCOR	571.514	0.786418	0.0794662	9.89626	4.32152e-23	8.96863e-22
SOD1	181.87	-2.83267	0.286496	-9.88728	4.72708e-23	9.79912e-22
TSPYL2	16.4118	-2.19201	0.221713	-9.88669	4.75503e-23	9.84583e-22
PSMD2	41.3158	-1.34451	0.136018	-9.88481	4.84488e-23	1.00205e-21
MCF2L	864.75	0.875101	0.088559	9.88156	5.00466e-23	1.03392e-21
TXNDC17	24.0787	-2.12218	0.214766	-9.88138	5.01372e-23	1.03461e-21
PITHD1	43.6718	-1.4251	0.14424	-9.88005	5.08094e-23	1.0473e-21
CCDC115	23.0897	-1.90481	0.1928	-9.87969	5.09928e-23	1.04989e-21
MTSS1	416.134	0.61066	0.0618289	9.87661	5.25823e-23	1.08139e-21
CDK2AP2	21.3836	-1.76247	0.178456	-9.87622	5.27863e-23	1.08436e-21
SPOCK1	15.6179	-2.92418	0.296138	-9.87436	5.37732e-23	1.10338e-21
TMEM60	18.4285	-1.8535	0.187711	-9.87419	5.38684e-23	1.10409e-21
POLDIP2	35.2438	-1.24572	0.126188	-9.87194	5.50884e-23	1.12782e-21
MAGOH	41.0246	-1.37046	0.138925	-9.86477	5.91705e-23	1.21003e-21
PRKCSH	29.1969	-1.44214	0.146347	-9.85429	6.56806e-23	1.34165e-21
SAMSN1-AS1	2.3892	-4.94085	0.501433	-9.85346	6.62228e-23	1.35121e-21
IMP3	24.135	-1.73411	0.176023	-9.85162	6.74498e-23	1.37471e-21
COMMD8	28.0273	-2.16033	0.219491	-9.84246	7.38842e-23	1.50416e-21
PSMA2	60.5901	-2.00378	0.203688	-9.83754	7.75853e-23	1.57774e-21
PIP5K1A	505.742	0.83937	0.0853346	9.83622	7.86086e-23	1.59676e-21
IDE	424.502	0.673001	0.0684217	9.83608	7.87193e-23	1.59723e-21
RWDD1	215.012	-1.13264	0.115153	-9.83595	7.88205e-23	1.5975e-21
AC008050.1	576.351	1.44657	0.147135	9.83158	8.23199e-23	1.66657e-21
ISOC1	38.8415	-1.54608	0.157258	-9.83146	8.24162e-23	1.66666e-21
USP34	1422.57	0.606212	0.0616727	9.82951	8.40295e-23	1.6974e-21
MAPK4	16.2928	-3.49865	0.356016	-9.82723	8.59491e-23	1.73425e-21
KBTBD4	24.4772	-1.43575	0.146119	-9.82589	8.70992e-23	1.7555e-21
INTU	452.634	0.956942	0.0974382	9.82101	9.14249e-23	1.84065e-21
HAGH	135.706	-1.02574	0.104446	-9.82076	9.16532e-23	1.8432e-21
HNRNPA1	148.639	-2.35819	0.240192	-9.81792	9.42729e-23	1.89379e-21
RAX2	245.744	-1.18921	0.121131	-9.81759	9.45785e-23	1.89783e-21
CBX1	58.0191	-1.10626	0.112758	-9.81088	1.01085e-22	2.02615e-21
SELENOS	114.876	-1.50713	0.153631	-9.81006	1.01911e-22	2.04046e-21
NXNL1	419.523	-0.92406	0.0942005	-9.80951	1.02469e-22	2.04937e-21
PMP22	7.74509	-3.47259	0.35411	-9.80653	1.05533e-22	2.10834e-21
RPS23	442.661	-3.30393	0.336977	-9.80462	1.07547e-22	2.14622e-21
IMP4	21.3516	-1.7356	0.177061	-9.80229	1.10062e-22	2.19401e-21
FBXL15	39.4401	-1.73463	0.177002	-9.80005	1.12527e-22	2.24068e-21
B4GAT1	40.3399	-2.1601	0.220503	-9.79623	1.16867e-22	2.32455e-21
LUC7L3	971.849	0.90918	0.0928104	9.79609	1.17024e-22	2.32514e-21
DYRK1A	534.128	0.714501	0.0729562	9.79357	1.19981e-22	2.38128e-21
CHGB	29.6338	-2.19344	0.224026	-9.791	1.23067e-22	2.43988e-21
WWC2	543.426	0.788159	0.0805011	9.79066	1.23488e-22	2.44554e-21
TRAPPC5	124.312	-2.19597	0.224344	-9.78838	1.26308e-22	2.49868e-21
IRF2BPL	39.703	-1.59195	0.162668	-9.78647	1.28708e-22	2.54339e-21
UBE3C	379.152	0.660698	0.0675195	9.7853	1.30203e-22	2.57014e-21
HIST1H2BC	6.66021	-3.17122	0.324112	-9.78435	1.31436e-22	2.59166e-21
TSTD1	44.8814	-1.74868	0.178814	-9.77933	1.38121e-22	2.72052e-21
SMARCB1	79.3813	-1.01064	0.103404	-9.77367	1.46069e-22	2.87395e-21
SC5D	36.1706	-1.39922	0.143215	-9.77005	1.51383e-22	2.97529e-21
RPL37A	479.366	-3.04128	0.311302	-9.76954	1.52143e-22	2.98699e-21
STOML2	27.2719	-2.18551	0.223984	-9.75743	1.71446e-22	3.36234e-21
AC110716.1	32.6412	-2.17708	0.223169	-9.75527	1.7513e-22	3.43088e-21
FKBP4	40.1032	-1.89988	0.194942	-9.74589	1.92089e-22	3.75908e-21
POLR3K	10.4191	-2.24537	0.230426	-9.74442	1.94879e-22	3.80958e-21
CASC1	154.694	0.934914	0.0959464	9.74413	1.95448e-22	3.81659e-21
RPL23	169.583	-2.73017	0.280246	-9.74206	1.99468e-22	3.89091e-21
PRELID1	51.1499	-2.58253	0.265174	-9.739	2.05572e-22	4.00567e-21
SLC38A2	37.0642	-1.78689	0.183481	-9.73879	2.05993e-22	4.00959e-21
IQGAP2	1701.29	0.729517	0.0749338	9.7355	2.12775e-22	4.13717e-21
TIMP1	17.6219	-3.56802	0.366506	-9.73521	2.13384e-22	4.14457e-21
DBP	79.7439	-1.65378	0.169925	-9.73241	2.19342e-22	4.25576e-21
RPS27L	52.2708	-1.41363	0.14526	-9.73171	2.20839e-22	4.28022e-21
PHYHIPL	90.7788	-1.11416	0.114506	-9.73008	2.24412e-22	4.34485e-21
ISCU	43.1403	-2.21177	0.227574	-9.71892	2.50431e-22	4.84343e-21
HIKESHI	78.9662	-0.93443	0.0961478	-9.71869	2.50996e-22	4.84921e-21
CDC42EP4	23.6342	-2.495	0.256754	-9.71748	2.53987e-22	4.90179e-21
CAP1	52.9324	-1.05496	0.108586	-9.71545	2.59096e-22	4.99508e-21
PGD	88.6751	-1.02095	0.105092	-9.71479	2.60783e-22	5.02228e-21
PDCD5	55.4076	-1.65697	0.17062	-9.71147	2.69419e-22	5.1831e-21
CALR	57.9353	-1.89418	0.195095	-9.70899	2.76061e-22	5.30527e-21
BRMS1	13.9103	-1.85785	0.1915	-9.70161	2.96791e-22	5.69764e-21
MIR99AHG	17.4035	-3.49502	0.360382	-9.6981	3.07179e-22	5.89083e-21
NDUFA13	198.441	-2.24309	0.231373	-9.69471	3.17537e-22	6.08305e-21
ETFB	70.1235	-2.1883	0.225931	-9.68571	3.46794e-22	6.63654e-21
TMEM9B	55.4104	-1.26833	0.130996	-9.68217	3.58996e-22	6.86283e-21
ANAPC15	42.3786	-1.57453	0.162754	-9.67429	3.87765e-22	7.405e-21
MRPL47	36.2382	-1.56266	0.161601	-9.66989	4.04794e-22	7.7221e-21
TM7SF2	21.3018	-1.79327	0.185507	-9.66687	4.16929e-22	7.94526e-21
HSPA8	176.013	-2.61871	0.271047	-9.66144	4.39638e-22	8.36924e-21
QARS	31.4778	-1.45517	0.15065	-9.65926	4.49086e-22	8.54014e-21
GOLGA1	436.764	0.840415	0.0870121	9.6586	4.52003e-22	8.58663e-21
NPAS4	2.03541	-5.35261	0.554857	-9.64684	5.06959e-22	9.62058e-21
MRPL40	33.8747	-2.27258	0.235659	-9.64352	5.23595e-22	9.92593e-21
KIAA1143	26.0256	-1.424	0.147685	-9.64216	5.30611e-22	1.00484e-20
ATG101	11.9755	-2.37252	0.246066	-9.64177	5.326e-22	1.00756e-20
THYN1	34.4989	-1.48689	0.154216	-9.64161	5.33437e-22	1.0081e-20
GABRR2	9.97658	-3.0255	0.313918	-9.63786	5.5327e-22	1.04449e-20
RPL22	368.982	-1.99518	0.207047	-9.63634	5.61565e-22	1.05905e-20
STIP1	52.5019	-1.7998	0.186823	-9.63373	5.7602e-22	1.08519e-20
RPL13A	673.669	-3.58488	0.372432	-9.62561	6.23388e-22	1.17321e-20
HIST1H4C	161.114	-3.71607	0.386177	-9.6227	6.41243e-22	1.20556e-20
FAM71E1	9.34774	-2.20313	0.229024	-9.61964	6.60612e-22	1.2407e-20
PSMC4	40.7427	-1.3439	0.139754	-9.61621	6.82996e-22	1.28141e-20
TP53TG1	22.8222	-1.63628	0.170172	-9.61543	6.8823e-22	1.2899e-20
CBX3	248.551	-1.014	0.10548	-9.6132	7.03318e-22	1.31682e-20
TMEM192	52.2154	-1.17075	0.121836	-9.60925	7.30808e-22	1.36688e-20
RPL29	230.317	-2.98647	0.310915	-9.60545	7.58233e-22	1.41672e-20
NUCB1	51.8558	-1.23619	0.128714	-9.60418	7.67686e-22	1.43291e-20
UBC	416.625	-2.44757	0.254961	-9.59978	8.01124e-22	1.49379e-20
PHYH	34.6097	-1.29166	0.134554	-9.59958	8.0273e-22	1.49525e-20
PARP1	194.628	-1.06167	0.110607	-9.59867	8.09856e-22	1.50698e-20
WWP1	632.203	0.613959	0.0639719	9.59732	8.20512e-22	1.52525e-20
COPS7A	35.7046	-1.60032	0.166846	-9.59159	8.67374e-22	1.61071e-20
BOLA2	9.5563	-2.80235	0.292188	-9.5909	8.73162e-22	1.6198e-20
NDUFB11	93.3975	-2.66459	0.278118	-9.58079	9.63064e-22	1.78476e-20
AUH	509.377	0.866675	0.0905073	9.57575	1.01121e-21	1.87208e-20
GYG1	67.2553	-1.13921	0.119068	-9.56769	1.09322e-21	2.02184e-20
TLNRD1	8.12583	-2.07348	0.216731	-9.56706	1.0999e-21	2.03213e-20
RREB1	321.884	0.830678	0.0868538	9.56409	1.13193e-21	2.08918e-20
RPS21	154.197	-2.80423	0.293278	-9.56169	1.15845e-21	2.13597e-20
MIR3936HG	333.561	1.02184	0.106885	9.56015	1.17582e-21	2.1658e-20
RPS12	451.431	-3.1654	0.33112	-9.55967	1.1813e-21	2.17368e-20
B3GNT5	179.548	1.73551	0.181632	9.55513	1.23431e-21	2.26893e-20
AC007376.2	450.988	1.1512	0.120509	9.55279	1.2625e-21	2.31842e-20
COX16	73.1324	-0.8968	0.0938802	-9.5526	1.26482e-21	2.32032e-20
SELENOT	126.888	-1.44342	0.151146	-9.54987	1.29855e-21	2.37981e-20
PGLS	33.1685	-1.41358	0.148044	-9.54839	1.31729e-21	2.41171e-20
ALDOC	401.124	-2.57657	0.269919	-9.54571	1.35178e-21	2.47237e-20
FAM200B	72.9791	-1.41531	0.14831	-9.54286	1.38943e-21	2.53868e-20
TIMM13	43.3335	-1.6151	0.169286	-9.5407	1.41874e-21	2.58963e-20
RNF144A	1020.48	0.99398	0.10429	9.53091	1.55909e-21	2.84296e-20
PPCS	31.5521	-1.64306	0.17256	-9.52169	1.70383e-21	3.10376e-20
LINC02058	121.717	1.22452	0.128637	9.51922	1.74489e-21	3.17221e-20
UBR5	530.518	0.625495	0.065708	9.51931	1.74339e-21	3.17221e-20
NMT1	218.418	-0.868992	0.0912985	-9.51815	1.76297e-21	3.20188e-20
NDFIP1	646.236	-0.761343	0.080075	-9.50788	1.94587e-21	3.53053e-20
CKS2	9.09879	-3.19215	0.335898	-9.50332	2.03298e-21	3.6849e-20
PRDX3	46.4009	-1.64165	0.172772	-9.5018	2.06294e-21	3.73548e-20
EIF3G	37.238	-2.08994	0.22001	-9.49927	2.11373e-21	3.82364e-20
SREK1IP1	80.3126	-0.967209	0.101836	-9.49772	2.14541e-21	3.8771e-20
C11orf80	547.688	0.739838	0.0779057	9.49659	2.16875e-21	3.91537e-20
PNRC1	164.532	-1.59369	0.167825	-9.49617	2.17747e-21	3.92722e-20
KCNB2	11139.5	0.877998	0.0925031	9.49154	2.27636e-21	4.10151e-20
FAM174A	92.1046	-0.946834	0.0997942	-9.48787	2.35808e-21	4.24455e-20
GABRG3-AS1	3.56033	-5.8906	0.620957	-9.48632	2.39331e-21	4.3037e-20
NCSTN	40.1942	-1.25521	0.13232	-9.48612	2.39797e-21	4.30782e-20
MIF	428.029	-2.97686	0.313933	-9.48248	2.48316e-21	4.45646e-20
RPS9	362.805	-3.01299	0.317781	-9.48137	2.50968e-21	4.4996e-20
DYNC1I2	163.463	-0.929878	0.0980823	-9.4806	2.52833e-21	4.52035e-20
EIF4A2	191.187	-1.93781	0.204396	-9.48066	2.52687e-21	4.52035e-20
PAM16	63.2615	-1.09268	0.115255	-9.48058	2.52871e-21	4.52035e-20
C18orf32	276.64	-1.98886	0.209868	-9.47669	2.62477e-21	4.68745e-20
SELENOH	56.6597	-1.67958	0.177311	-9.47254	2.73111e-21	4.87258e-20
CCDC167	20.9944	-1.45229	0.153444	-9.46465	2.94555e-21	5.25002e-20
VDAC2	175.925	-1.92602	0.203601	-9.45977	3.08612e-21	5.49517e-20
TMEM14C	62.1028	-2.20169	0.232769	-9.45873	3.11702e-21	5.54476e-20
FUNDC1	25.5003	-2.32614	0.246004	-9.4557	3.2086e-21	5.70209e-20
FSD1L	2469.26	1.27317	0.1347	9.45189	3.3276e-21	5.90778e-20
RBP3	392.323	-2.3264	0.246249	-9.44737	3.47466e-21	6.16287e-20
SEM1	166.832	-1.08095	0.114441	-9.44542	3.53998e-21	6.2726e-20
DBNDD2	19.3178	-1.82755	0.193622	-9.43872	3.77366e-21	6.68014e-20
IFT88	561.688	0.569956	0.060396	9.43698	3.8367e-21	6.78514e-20
PODXL2	63.7091	-1.17102	0.124157	-9.4318	4.03095e-21	7.12173e-20
ZBTB2	10.1665	-1.71141	0.181529	-9.42775	4.18969e-21	7.395e-20
HMGB2	74.6796	-2.02913	0.215249	-9.42686	4.22534e-21	7.45069e-20
MRPS18A	24.443	-1.56108	0.165688	-9.4218	4.43411e-21	7.81125e-20
APMAP	58.7829	-1.26211	0.133964	-9.42131	4.45484e-21	7.84017e-20
CNIH1	83.8046	-1.08564	0.115283	-9.41717	4.63413e-21	8.14782e-20
C8orf37	20.1318	-1.39003	0.147624	-9.41602	4.68516e-21	8.22958e-20
RPL23A	290.048	-3.30267	0.350878	-9.41258	4.84116e-21	8.4954e-20
CNBP	157.809	-1.88795	0.2006	-9.41149	4.89146e-21	8.57538e-20
JUNB	54.841	-2.94495	0.312918	-9.41127	4.90195e-21	8.58549e-20
EBAG9	44.7296	-1.19588	0.127072	-9.41103	4.91289e-21	8.59637e-20
CXXC5	50.7171	-1.42942	0.152055	-9.40065	5.42261e-21	9.47914e-20
CUEDC2	55.0729	-1.29445	0.137751	-9.39705	5.61123e-21	9.79944e-20
PKM	1782.18	-1.58929	0.169193	-9.3934	5.8095e-21	1.0136e-19
TGFB2	5.16595	-3.0954	0.329578	-9.39198	5.88806e-21	1.02632e-19
P4HB	55.056	-1.32426	0.14104	-9.38925	6.04291e-21	1.0523e-19
SEMA5A	8.41666	-3.22864	0.344008	-9.38539	6.26863e-21	1.08952e-19
AL157938.3	51.9992	-1.68832	0.179887	-9.38541	6.26745e-21	1.08952e-19
RPS27A	521.518	-3.08266	0.328504	-9.38392	6.35646e-21	1.10373e-19
ELP5	102.097	-0.980779	0.104529	-9.3828	6.42448e-21	1.11448e-19
NEUROD1	308.893	-1.25466	0.133786	-9.37808	6.71855e-21	1.16438e-19
OAT	66.2768	-1.15073	0.122774	-9.37277	7.06538e-21	1.22332e-19
MRPS15	30.2194	-1.38146	0.147396	-9.37246	7.08618e-21	1.22575e-19
AC009163.4	16.1469	18.5342	1.97769	9.37161	7.14312e-21	1.23443e-19
IGF1R	818.922	0.885733	0.0945139	9.37146	7.1536e-21	1.23507e-19
TRAPPC2L	23.5146	-2.39732	0.255821	-9.37106	7.18079e-21	1.23858e-19
EIF6	25.6729	-1.82096	0.194441	-9.36513	7.59555e-21	1.30888e-19
ARL6IP5	358.179	-1.50576	0.160941	-9.35598	8.28273e-21	1.42595e-19
TULP2	6.73881	-4.49252	0.480604	-9.34766	8.9608e-21	1.54122e-19
ZRANB3	407.77	0.681911	0.0730819	9.33078	1.05094e-20	1.80587e-19
RPL26	407.755	-3.14446	0.337038	-9.32969	1.06184e-20	1.82287e-19
DCTPP1	15.887	-2.34175	0.251055	-9.32767	1.08226e-20	1.85618e-19
TMCO1	174.439	-0.995945	0.106799	-9.32538	1.10592e-20	1.89496e-19
BAG6	70.223	-1.1412	0.122414	-9.32246	1.13669e-20	1.94585e-19
PPA1	745.691	-1.43472	0.153983	-9.31743	1.1919e-20	2.03846e-19
CD63	241.798	-2.45077	0.2631	-9.31496	1.21996e-20	2.08448e-19
LINC01322	31.2552	-1.524	0.163616	-9.3145	1.22533e-20	2.09168e-19
WBP4	70.0738	-0.999367	0.107324	-9.31168	1.25824e-20	2.14586e-19
MCRIP1	41.7165	-1.69746	0.182312	-9.31074	1.2695e-20	2.16302e-19
TWISTNB	12.5427	-1.74428	0.187385	-9.30854	1.29607e-20	2.20623e-19
MDH1	215.016	-1.39038	0.149408	-9.30592	1.32831e-20	2.259e-19
C3orf14	37.5143	-1.68478	0.181088	-9.30366	1.35691e-20	2.30548e-19
COPRS	36.9536	-2.1306	0.229071	-9.30105	1.39071e-20	2.3607e-19
RDH12	217.881	-1.16656	0.125431	-9.30044	1.39866e-20	2.37199e-19
COPZ1	68.7561	-1.27096	0.136659	-9.30021	1.40166e-20	2.37486e-19
NQO2	25.8954	-1.56542	0.168364	-9.29783	1.43339e-20	2.42635e-19
NELFCD	30.8375	-1.25243	0.13475	-9.29445	1.47975e-20	2.5025e-19
AL358115.1	18.8698	-1.80288	0.194028	-9.29186	1.51622e-20	2.56178e-19
NINL	193.462	1.1281	0.121413	9.2914	1.52278e-20	2.57049e-19
RPL18	257.992	-2.53716	0.273069	-9.29127	1.52454e-20	2.57107e-19
ZNF669	9.06172	-1.88122	0.202481	-9.29087	1.53039e-20	2.57854e-19
PLD3	107.714	-0.909881	0.0979359	-9.29057	1.5346e-20	2.58324e-19
NEDD4L	3576.49	0.730243	0.0787133	9.27725	1.73911e-20	2.9248e-19
TMEM203	17.1776	-1.91623	0.206715	-9.26992	1.86277e-20	3.12987e-19
KANSL3	132.036	0.984904	0.106263	9.26855	1.88698e-20	3.16762e-19
AP001439.1	12.9573	-3.55812	0.383902	-9.26831	1.89111e-20	3.17162e-19
EFCAB6	220.496	0.865383	0.0933776	9.26757	1.90438e-20	3.19093e-19
DUT	74.2418	-1.44186	0.155591	-9.26698	1.91499e-20	3.20576e-19
FUZ	18.2137	-1.60684	0.173487	-9.26202	2.00605e-20	3.3551e-19
DCTN6	41.2176	-1.65623	0.178823	-9.26185	2.00924e-20	3.35736e-19
HSPA1A	196.999	-3.60364	0.389179	-9.25959	2.05212e-20	3.42586e-19
FZD3	365.554	0.824482	0.0890532	9.25831	2.07701e-20	3.46422e-19
HIST3H2A	103.967	-1.71604	0.185374	-9.25715	2.09962e-20	3.49873e-19
POLR3GL	44.0106	-1.24611	0.134616	-9.25675	2.10743e-20	3.50853e-19
LINC02141	4.85452	-3.73692	0.403722	-9.25617	2.11894e-20	3.52445e-19
GRN	15.9769	-1.68768	0.182375	-9.25393	2.16378e-20	3.59576e-19
MCF2L2	1783.37	0.683073	0.0738222	9.25295	2.18379e-20	3.62569e-19
ANGPTL1	450.68	-1.35878	0.146866	-9.25182	2.20709e-20	3.66103e-19
RPLP1	755.39	-3.03996	0.328615	-9.25081	2.22792e-20	3.69222e-19
ROGDI	176.125	-1.05637	0.114208	-9.24948	2.25588e-20	3.73515e-19
RPL17	426.698	-3.00945	0.325433	-9.24753	2.29743e-20	3.80048e-19
ALDH2	122.476	-0.789303	0.0853889	-9.24363	2.3828e-20	3.93812e-19
CFL2	39.6928	-1.76841	0.191344	-9.24204	2.41848e-20	3.99346e-19
TMED3	18.6254	-1.69984	0.183961	-9.24023	2.45965e-20	4.05775e-19
SPIN1	381.599	0.659263	0.0713603	9.23852	2.49935e-20	4.1195e-19
C12orf10	31.5317	-2.00448	0.217086	-9.23358	2.61732e-20	4.31004e-19
COX7A1	47.2712	-2.95268	0.319833	-9.23194	2.65767e-20	4.37253e-19
TMEFF2	4.3605	-3.2715	0.35449	-9.22876	2.73794e-20	4.50052e-19
EEF1E1	33.2768	-1.46675	0.159114	-9.21825	3.01994e-20	4.95957e-19
CHPF	10.2192	-2.26655	0.245977	-9.2145	3.12725e-20	5.12829e-19
MRPL36	26.1995	-2.05169	0.222659	-9.21447	3.12831e-20	5.12829e-19
PSMF1	71.3416	-0.864984	0.0938994	-9.21181	3.2066e-20	5.25189e-19
LEKR1	189.213	1.08114	0.117383	9.21036	3.25035e-20	5.31875e-19
EMC7	63.6398	-1.71692	0.186445	-9.20872	3.30039e-20	5.39578e-19
STK33	945.862	0.668066	0.0725593	9.20717	3.34824e-20	5.4691e-19
DOK6	39.7446	-3.31674	0.360277	-9.20609	3.38219e-20	5.51958e-19
UBE2J1	82.7565	-0.995093	0.108187	-9.19788	3.6507e-20	5.95244e-19
GSK3B	825.139	0.687317	0.0747505	9.19482	3.75611e-20	6.11883e-19
MTTP	12.7386	-2.81461	0.306125	-9.19432	3.77375e-20	6.14206e-19
PFDN6	29.238	-2.22688	0.242255	-9.1923	3.84531e-20	6.25293e-19
KLF6	36.703	-1.47157	0.160147	-9.18887	3.96972e-20	6.44946e-19
ARPC5L	24.6396	-1.64051	0.178672	-9.18168	4.24426e-20	6.88934e-19
PCNA	47.3108	-1.97843	0.215552	-9.17844	4.37384e-20	7.09335e-19
MAP4K3	701.006	0.57426	0.0625954	9.17417	4.55086e-20	7.37385e-19
TSSC4	18.4895	-1.99511	0.217485	-9.17355	4.5771e-20	7.40976e-19
FTL	415.89	-3.30717	0.360593	-9.17148	4.66552e-20	7.54618e-19
GDI1	56.8528	-1.20149	0.131035	-9.16923	4.76421e-20	7.69896e-19
RAB7A	206.348	-0.518566	0.0565682	-9.16709	4.85957e-20	7.84609e-19
PTPRT	18.8627	-2.77687	0.303013	-9.16418	4.99246e-20	8.0535e-19
CIB1	27.5849	-1.98913	0.217093	-9.16255	5.06874e-20	8.16929e-19
TMBIM4	109.948	-1.29388	0.14124	-9.16083	5.14996e-20	8.29284e-19
IFT27	56.8767	-1.07616	0.117518	-9.15745	5.31364e-20	8.54598e-19
ATP6AP1	38.0564	-1.99423	0.217772	-9.15739	5.31656e-20	8.54598e-19
PEBP1	329.382	-2.49974	0.273057	-9.15466	5.45279e-20	8.75723e-19
HEXB	35.504	-1.00915	0.11024	-9.15418	5.47705e-20	8.78841e-19
GGCT	26.7973	-1.38439	0.151258	-9.15252	5.56194e-20	8.91676e-19
NPM1	130.19	-1.80231	0.197087	-9.14472	5.97834e-20	9.57588e-19
SMPD3	7.53103	-2.60317	0.284709	-9.14328	6.05846e-20	9.69568e-19
GSKIP	95.0537	-0.972651	0.106383	-9.14293	6.07839e-20	9.71901e-19
ARNT	251.111	0.571417	0.0625127	9.14081	6.19885e-20	9.89311e-19
SPCS1	247.486	-1.91597	0.209605	-9.14086	6.19553e-20	9.89311e-19
STX16	168.243	0.86017	0.0941031	9.14072	6.2036e-20	9.89311e-19
CYP51A1	116.315	-1.12639	0.123248	-9.13919	6.29238e-20	1.00259e-18
ANKRD28	612.826	0.612663	0.0670636	9.13555	6.50777e-20	1.036e-18
BMPR1A	558.381	0.603388	0.0660499	9.13533	6.52079e-20	1.03717e-18
MANBAL	18.9248	-1.48764	0.162946	-9.12964	6.87286e-20	1.09221e-18
RPS24	356.878	-2.69336	0.295057	-9.12829	6.95918e-20	1.10496e-18
SLC44A1	1624.91	0.750952	0.0822705	9.12784	6.98767e-20	1.10852e-18
ZNF804B	32.7613	-5.50199	0.602851	-9.12662	7.06721e-20	1.12016e-18
ZNF503-AS1	4.15533	-3.60861	0.395499	-9.1242	7.22677e-20	1.14445e-18
CTSL	36.4133	-1.48493	0.162752	-9.12384	7.251e-20	1.14729e-18
VPS35	146.425	-0.82976	0.0909709	-9.12116	7.43273e-20	1.17502e-18
TSC22D4	23.9375	-3.75922	0.41222	-9.11945	7.55091e-20	1.19266e-18
NACA	275.197	-2.73877	0.300491	-9.11431	7.91709e-20	1.24942e-18
GCH1	20.4429	-1.98434	0.217932	-9.1053	8.60251e-20	1.35641e-18
MAP1LC3B	249.664	-1.48052	0.162694	-9.10004	9.02987e-20	1.42256e-18
CLU	207.688	-3.41953	0.375907	-9.09675	9.30732e-20	1.465e-18
SLC35B2	8.77445	-2.09851	0.230701	-9.09624	9.35168e-20	1.47071e-18
NKIRAS1	98.479	-0.749355	0.0824207	-9.09183	9.73888e-20	1.53028e-18
UBE2N	175.915	-0.989983	0.108894	-9.09128	9.78811e-20	1.53668e-18
STOM	67.3577	-1.06623	0.117287	-9.09077	9.83371e-20	1.54251e-18
CDC42	137.521	-1.01773	0.111955	-9.09051	9.85755e-20	1.54492e-18
PRDX1	314.684	-2.607	0.286821	-9.0893	9.96765e-20	1.56083e-18
TOB2	206.678	-0.894214	0.0984006	-9.08749	1.01351e-19	1.58568e-18
TRIAP1	8.91695	-2.16385	0.238146	-9.08625	1.02514e-19	1.60249e-18
FO393418.1	8.5376	-2.30725	0.253951	-9.08542	1.03299e-19	1.61339e-18
PDCL	49.3176	-1.11769	0.123025	-9.08505	1.0365e-19	1.61747e-18
IER5	8.13017	-2.6441	0.291109	-9.08286	1.05756e-19	1.64892e-18
MOK	628.171	0.744785	0.0820219	9.08032	1.08252e-19	1.68639e-18
PDAP1	81.4003	-1.34603	0.148257	-9.07904	1.09538e-19	1.70497e-18
WDR11	237.245	0.722748	0.0796079	9.07886	1.09721e-19	1.70636e-18
GPSM2	380.222	0.930271	0.102517	9.07433	1.1438e-19	1.77729e-18
MYL9	5.52765	-5.27868	0.581832	-9.07251	1.16303e-19	1.80563e-18
MRPL2	30.1076	-1.39117	0.153343	-9.07226	1.16577e-19	1.80833e-18
IKBKB	416.161	0.770676	0.0849577	9.07129	1.1762e-19	1.82295e-18
RPL18A	364.804	-3.42552	0.377639	-9.07088	1.18055e-19	1.82815e-18
SLC39A3	14.4584	-1.94572	0.214512	-9.07046	1.18519e-19	1.83377e-18
ZNF281	27.6574	-1.35878	0.149836	-9.06845	1.20727e-19	1.86634e-18
CMTM6	26.9436	-1.292	0.142497	-9.06691	1.22445e-19	1.89129e-18
YIF1A	31.0174	-1.70388	0.187935	-9.06631	1.23116e-19	1.90004e-18
ATP6V1B2	171.037	-1.0555	0.116459	-9.0633	1.26557e-19	1.9515e-18
XBP1	46.774	-1.27915	0.141171	-9.06099	1.29266e-19	1.99157e-18
UQCC3	44.0237	-1.93523	0.213725	-9.05475	1.36878e-19	2.10706e-18
GNL2	24.0247	-1.22189	0.135009	-9.05045	1.42383e-19	2.18996e-18
VGLL4	690.342	0.541445	0.0598281	9.05002	1.42946e-19	2.19675e-18
COL9A2	7.60152	-3.39571	0.37537	-9.04631	1.47885e-19	2.27073e-18
ZFAND5	50.1887	-1.21367	0.134165	-9.04613	1.48121e-19	2.27243e-18
CLTB	238.247	-2.03999	0.225584	-9.04313	1.52245e-19	2.33374e-18
SLX4IP	247.281	0.694487	0.076833	9.03893	1.58218e-19	2.42325e-18
FAM210B	22.6616	-1.6456	0.182175	-9.0331	1.66879e-19	2.55375e-18
WDR27	171.824	0.884453	0.0979496	9.02967	1.72184e-19	2.63272e-18
ALDH9A1	33.4561	-1.48091	0.164056	-9.02686	1.76665e-19	2.69896e-18
RPL30	274.441	-2.29196	0.25395	-9.02523	1.79318e-19	2.7372e-18
PARD3	1136.16	1.03862	0.115081	9.02512	1.79499e-19	2.73767e-18
SON	374.266	-0.825367	0.0915185	-9.01859	1.9053e-19	2.90347e-18
CEP164	1006.45	0.73611	0.0816262	9.01805	1.91464e-19	2.91525e-18
AP001790.1	118.927	1.67565	0.185824	9.01742	1.92575e-19	2.92972e-18
C1orf122	116.589	-1.52781	0.169455	-9.01597	1.95139e-19	2.96624e-18
TUBA4A	97.2125	-1.51358	0.168004	-9.0092	2.07564e-19	3.15247e-18
PRR16	1544.23	0.874494	0.0970804	9.00793	2.09978e-19	3.18648e-18
APRT	16.7674	-2.15785	0.239565	-9.00737	2.11054e-19	3.20013e-18
CCT7	52.6333	-1.73769	0.192928	-9.00694	2.11879e-19	3.20996e-18
INSIG1	28.802	-2.21345	0.245855	-9.00308	2.19472e-19	3.32223e-18
PCBP1	50.5832	-2.06077	0.22917	-8.99231	2.42091e-19	3.65853e-18
PRDX4	25.6783	-1.74152	0.193666	-8.99238	2.41927e-19	3.65853e-18
TRAPPC6A	27.516	-1.33833	0.14885	-8.9911	2.44775e-19	3.69603e-18
POLR2M	9.32131	-1.71565	0.190841	-8.98999	2.47263e-19	3.73049e-18
CHRDL1	6.80528	-4.10274	0.456403	-8.98928	2.48858e-19	3.75144e-18
SRA1	51.066	-0.974911	0.108455	-8.98911	2.49244e-19	3.75414e-18
EIF4G3	1064.46	0.557265	0.062003	8.98771	2.52425e-19	3.79891e-18
TRIM52-AS1	16.2765	-1.67752	0.186719	-8.98418	2.6066e-19	3.91961e-18
NR1D1	27.049	-1.85434	0.206636	-8.97398	2.85987e-19	4.29689e-18
KDELR1	28.8184	-1.32599	0.147763	-8.97372	2.86677e-19	4.30371e-18
CREBZF	200.944	0.968062	0.107993	8.96416	3.12665e-19	4.68998e-18
KHDRBS3	20.5068	-2.25014	0.251034	-8.96346	3.14639e-19	4.71569e-18
FOXP2	11.6433	-4.12234	0.459931	-8.96294	3.16123e-19	4.73403e-18
AL355075.4	3.88915	-3.24488	0.362052	-8.96246	3.17526e-19	4.75113e-18
RPP21	25.5151	-1.45992	0.162942	-8.95972	3.25497e-19	4.8664e-18
FIBP	32.5859	-1.99031	0.222168	-8.95857	3.28927e-19	4.91364e-18
ZNF667-AS1	57.9507	-1.09667	0.122429	-8.95763	3.31739e-19	4.95157e-18
NARS	93.7754	-1.05912	0.118238	-8.95753	3.32041e-19	4.95201e-18
PUF60	32.9017	-1.88175	0.210166	-8.95364	3.43939e-19	5.12526e-18
MRPL33	124.316	-1.48008	0.165319	-8.95284	3.46461e-19	5.1586e-18
ERLEC1	84.1449	-1.02889	0.114938	-8.95171	3.50008e-19	5.20715e-18
POP7	14.5027	-2.61327	0.292054	-8.94791	3.6229e-19	5.38548e-18
FAIM	233.685	-1.32829	0.148472	-8.9464	3.6725e-19	5.45475e-18
PSMB2	57.9508	-1.08937	0.121804	-8.94365	3.76535e-19	5.58808e-18
MRPS14	60.2159	-0.973222	0.108855	-8.94051	3.87366e-19	5.74413e-18
TINF2	15.895	-1.71517	0.19189	-8.93832	3.95144e-19	5.8547e-18
SLC10A1	34.9161	-1.95184	0.21839	-8.93738	3.98489e-19	5.89945e-18
RHOA	97.4887	-0.838816	0.0938639	-8.93651	4.0165e-19	5.94142e-18
MRPS34	38.9216	-1.52725	0.170909	-8.93609	4.03173e-19	5.95909e-18
SERP2	43.4644	-1.43608	0.160722	-8.93518	4.06515e-19	6.00361e-18
SET	98.2728	-1.75512	0.196534	-8.93037	4.2458e-19	6.26531e-18
AC009716.1	38.4929	2.74599	0.307498	8.93011	4.25579e-19	6.27496e-18
YTHDF2	67.6518	-0.7477	0.0837434	-8.92846	4.31973e-19	6.36407e-18
AL627171.1	10.944	-2.44531	0.273922	-8.92702	4.37653e-19	6.44254e-18
CREB3	20.4939	-1.64482	0.184341	-8.92268	4.55124e-19	6.69431e-18
ARPC3	57.3108	-1.3426	0.150513	-8.92017	4.65575e-19	6.84248e-18
CORO7	26.04	-1.48583	0.166632	-8.91681	4.79915e-19	7.04755e-18
CYTH1	957.447	0.684569	0.0767895	8.91489	4.88306e-19	7.16497e-18
OTUD6B-AS1	181.705	-1.69754	0.19042	-8.91473	4.89008e-19	7.16949e-18
SURF2	20.4511	-2.29225	0.257476	-8.9028	5.44576e-19	7.97776e-18
FBL	21.8608	-1.64384	0.184663	-8.90187	5.49112e-19	8.03773e-18
ETFRF1	76.5647	-1.21381	0.136392	-8.89949	5.61064e-19	8.20606e-18
FTH1	1153.97	-3.43108	0.385599	-8.89805	5.68361e-19	8.30425e-18
PER1	104.997	-1.53704	0.17274	-8.89799	5.6869e-19	8.30425e-18
WBP2	110.371	-1.21198	0.136219	-8.89725	5.72454e-19	8.35249e-18
B3GAT3	63.107	-1.13312	0.127397	-8.89438	5.87453e-19	8.56448e-18
PRDX2	313.196	-2.29596	0.258237	-8.89093	6.0598e-19	8.82749e-18
PABPC4	201.42	-1.43199	0.161104	-8.88861	6.18788e-19	9.00687e-18
AL139423.1	123.834	1.57748	0.177513	8.88659	6.30139e-19	9.16474e-18
HEIH	30.5035	-1.63341	0.183845	-8.8847	6.40921e-19	9.3141e-18
TRDN	34.2815	-3.6766	0.413868	-8.8835	6.47886e-19	9.4078e-18
GOLGA7	30.6498	-1.48799	0.16754	-8.88142	6.60123e-19	9.57784e-18
HEBP2	26.86	-1.80648	0.203429	-8.88014	6.67734e-19	9.68054e-18
MZT2B	68.8534	-2.20146	0.24794	-8.87903	6.74471e-19	9.77042e-18
MCRS1	31.7245	-1.1469	0.129249	-8.87357	7.08365e-19	1.02532e-17
PHC3	449.716	0.643799	0.0725606	8.87256	7.14816e-19	1.03302e-17
OPN1SW	318.6	-2.96976	0.33471	-8.87264	7.14335e-19	1.03302e-17
BBIP1	142.082	-0.67171	0.0758174	-8.85957	8.03261e-19	1.15991e-17
BLOC1S2	41.8686	-1.44802	0.16355	-8.85366	8.46931e-19	1.222e-17
ANAPC16	258.164	-1.14231	0.129065	-8.85067	8.6999e-19	1.25428e-17
EXOSC4	9.57382	-1.97145	0.222758	-8.85022	8.73478e-19	1.25831e-17
NBAS	375.945	0.714771	0.0807952	8.8467	9.01478e-19	1.29761e-17
RCN1	16.7463	-2.64124	0.298579	-8.84605	9.06724e-19	1.30413e-17
ACAT1	79.3475	-0.929401	0.105102	-8.84282	9.33333e-19	1.34134e-17
RPA2	34.5211	-1.32482	0.149823	-8.84256	9.35512e-19	1.34341e-17
MPHOSPH6	68.6369	-1.02613	0.116144	-8.83503	1.00069e-18	1.43587e-17
LRCH1	687.959	0.68235	0.0772358	8.83464	1.0042e-18	1.43977e-17
NUBP2	32.3174	-1.35511	0.1534	-8.83383	1.01152e-18	1.44912e-17
SS18L2	47.6606	-1.24562	0.141067	-8.82995	1.04725e-18	1.49914e-17
APEX1	71.5191	-1.30892	0.148261	-8.82852	1.06074e-18	1.51725e-17
PEF1	23.225	-1.30392	0.147696	-8.82839	1.06195e-18	1.51778e-17
CEMIP	98.5836	1.99431	0.22591	8.82789	1.06672e-18	1.5234e-17
CCT3	193.583	-1.17045	0.132607	-8.82642	1.08076e-18	1.54225e-17
CEP192	196.213	0.626731	0.0710232	8.82431	1.10135e-18	1.57039e-17
TCF7	48.8212	-1.48661	0.168566	-8.81915	1.15337e-18	1.64328e-17
METTL26	28.3074	-1.77947	0.201832	-8.81659	1.18e-18	1.67991e-17
PAK3	9.94085	-2.91475	0.330706	-8.81373	1.21048e-18	1.72195e-17
SPRY1	29.6864	-1.67616	0.190295	-8.80821	1.27165e-18	1.80755e-17
AC008067.1	2.72031	-4.40273	0.500221	-8.80156	1.3493e-18	1.91643e-17
CHCHD1	34.1608	-1.93423	0.219772	-8.80107	1.35516e-18	1.92325e-17
DNAJC13	152.121	0.828266	0.0941134	8.80072	1.35943e-18	1.9278e-17
TKT	44.0855	-1.23961	0.140861	-8.80019	1.36583e-18	1.93537e-17
NUBP1	21.965	-1.30325	0.148213	-8.7931	1.45485e-18	2.05991e-17
RPS18	423.391	-3.28549	0.373691	-8.79201	1.46912e-18	2.07849e-17
AC016716.2	3.5982	-4.87812	0.554948	-8.79023	1.49259e-18	2.11005e-17
ARPC1A	77.6308	-0.795788	0.0905922	-8.78429	1.57356e-18	2.22205e-17
ZNF862	149.963	0.981754	0.111763	8.78424	1.57426e-18	2.22205e-17
FYN	14.1771	-3.03036	0.345026	-8.78299	1.59189e-18	2.24346e-17
YWHAZ	188.782	-0.727187	0.0827943	-8.78306	1.5909e-18	2.24346e-17
TPGS1	23.6968	-1.70564	0.194316	-8.77768	1.66888e-18	2.35013e-17
ENO1	269.239	-1.87685	0.213827	-8.77744	1.67241e-18	2.35329e-17
MRPL28	37.8672	-1.87169	0.21338	-8.77162	1.76118e-18	2.47627e-17
DGKB	14.0927	-4.01061	0.45732	-8.76981	1.78973e-18	2.51447e-17
CLIC4	113.721	-0.927482	0.1058	-8.7664	1.84466e-18	2.58965e-17
FAM3C	44.8161	-1.43848	0.164199	-8.76061	1.942e-18	2.72419e-17
UQCRC2	267.255	-0.584585	0.0667514	-8.75764	1.99373e-18	2.79461e-17
TRA2B	156.075	-0.699574	0.079918	-8.75365	2.06556e-18	2.89306e-17
SDR39U1	41.0326	-1.33489	0.152533	-8.7515	2.10528e-18	2.94642e-17
DNAJB11	24.6386	-1.61424	0.184468	-8.7508	2.1185e-18	2.96264e-17
CRABP1	100.179	-3.63337	0.415327	-8.74821	2.16769e-18	3.0291e-17
ERCC1	51.4658	-1.03937	0.118812	-8.74801	2.17142e-18	3.03198e-17
KBTBD7	17.6482	-1.49448	0.170863	-8.74666	2.19766e-18	3.06627e-17
SKIL	155.898	-0.749673	0.0857183	-8.74578	2.21478e-18	3.08778e-17
TM9SF1	17.5482	-1.45	0.165954	-8.73736	2.38624e-18	3.32428e-17
GRPEL1	37.4983	-1.24138	0.142119	-8.73476	2.44174e-18	3.39899e-17
PBX3	1060.19	0.688282	0.0788204	8.73227	2.49608e-18	3.47197e-17
COA5	43.4894	-1.32805	0.15211	-8.73086	2.52741e-18	3.51286e-17
TUFM	125.152	-1.47926	0.169432	-8.73069	2.53123e-18	3.51549e-17
CHCHD4	7.76367	-2.09259	0.239801	-8.72639	2.6293e-18	3.6489e-17
TRAPPC4	43.0404	-1.51965	0.174157	-8.72574	2.64439e-18	3.66704e-17
SOX2	10.0432	-3.64242	0.417484	-8.72471	2.66867e-18	3.69633e-17
TUBG1	14.9662	-1.56034	0.178842	-8.72467	2.66957e-18	3.69633e-17
ROM1	538.1	-2.13974	0.245327	-8.72199	2.73347e-18	3.78193e-17
MRPL23	15.2273	-2.82222	0.323614	-8.72095	2.75882e-18	3.8141e-17
PROX1-AS1	7.60143	-3.79151	0.434937	-8.71738	2.84722e-18	3.93331e-17
NECAP2	55.2294	-1.70544	0.19577	-8.71146	2.9999e-18	4.14109e-17
MAP1B	1893.47	-0.790648	0.0907692	-8.71053	3.02461e-18	4.17204e-17
DBI	48.8097	-3.23535	0.371455	-8.70995	3.04001e-18	4.1901e-17
COX7A2L	162.761	-1.41264	0.162268	-8.70562	3.15846e-18	4.35005e-17
KCNH3	11.7449	-1.97277	0.226656	-8.70381	3.20922e-18	4.41663e-17
LINC02062	60.9296	1.34003	0.154006	8.70115	3.28533e-18	4.51795e-17
CDH2	1598.58	0.638865	0.073468	8.69582	3.44326e-18	4.73156e-17
SPINK4	46.3297	-2.65071	0.304842	-8.69535	3.45757e-18	4.74538e-17
NDUFAF8	58.9388	-1.02926	0.11837	-8.69532	3.45854e-18	4.74538e-17
ARF1	96.0878	-1.34157	0.15429	-8.69514	3.46404e-18	4.74935e-17
TBPL1	52.0925	-1.13119	0.130098	-8.69486	3.4726e-18	4.75748e-17
COPS4	104.766	-0.674393	0.0775883	-8.69194	3.56306e-18	4.87774e-17
FAM136A	26.5013	-1.62492	0.186954	-8.69154	3.57548e-18	4.89106e-17
PMM1	26.1201	-1.32273	0.15222	-8.6896	3.63728e-18	4.97186e-17
CHST9	6.6482	-3.63465	0.418357	-8.68791	3.69182e-18	5.04262e-17
SLU7	56.2922	-1.16845	0.134497	-8.68761	3.70157e-18	5.05214e-17
ATP6V0C	268.066	-2.06168	0.237331	-8.68697	3.72226e-18	5.07657e-17
PDCL3	16.9562	-1.93504	0.222773	-8.68613	3.74993e-18	5.11048e-17
RPL39	263.523	-3.49235	0.402118	-8.6849	3.79062e-18	5.16206e-17
TSPAN13	30.4193	-1.3249	0.152571	-8.68381	3.82731e-18	5.20812e-17
COX20	193.704	-1.15689	0.133236	-8.68304	3.85313e-18	5.23934e-17
DENND3	29.509	2.54787	0.293504	8.68086	3.92799e-18	5.33713e-17
SBDS	42.1386	-1.87591	0.216216	-8.67609	4.09612e-18	5.56143e-17
CD2BP2	21.2315	-1.46233	0.168573	-8.67471	4.14606e-18	5.62503e-17
TULP4	920.167	0.601388	0.0693827	8.6677	4.40919e-18	5.97756e-17
MTMR3	290.357	0.697364	0.0804592	8.66731	4.4246e-18	5.99399e-17
ARGLU1	698.331	0.958733	0.110617	8.6671	4.43257e-18	6.0003e-17
ABHD11	12.9578	-1.54383	0.178129	-8.66687	4.44147e-18	6.00788e-17
RUNDC3A	24.1443	-1.36095	0.157056	-8.6654	4.49914e-18	6.08137e-17
ATP6V0B	189.09	-2.08582	0.240779	-8.66279	4.60358e-18	6.21791e-17
NFKBIZ	6.94075	-2.38805	0.275824	-8.65788	4.80607e-18	6.48659e-17
CCDC12	120.723	-0.670344	0.0774466	-8.65556	4.90489e-18	6.61505e-17
CHURC1	116.453	-0.874162	0.100999	-8.65519	4.92113e-18	6.63203e-17
THAP11	12.8706	-1.85513	0.214345	-8.65486	4.93498e-18	6.64578e-17
SLC25A16	182.333	0.854812	0.0987777	8.6539	4.97689e-18	6.69725e-17
RGS20	748.708	0.930141	0.107513	8.65144	5.08519e-18	6.83793e-17
NTMT1	17.7398	-1.42364	0.164581	-8.65008	5.14624e-18	6.91491e-17
DUXB	12.8352	-2.29897	0.265826	-8.64841	5.22232e-18	7.01195e-17
MZT1	32.9195	-1.5046	0.174033	-8.64546	5.3591e-18	7.19029e-17
KHDRBS2	24.1982	-3.47508	0.402032	-8.6438	5.4373e-18	7.28984e-17
CCDC28B	38.3993	-1.26748	0.146668	-8.64184	5.53165e-18	7.41087e-17
PRNP	138.297	-1.29732	0.150175	-8.63874	5.68349e-18	7.60867e-17
PYCR2	34.3794	-1.51752	0.17567	-8.63844	5.69867e-18	7.62338e-17
RPL3	787.032	-3.3274	0.38532	-8.6354	5.8521e-18	7.82288e-17
CDH12	71.578	-2.1676	0.251037	-8.63461	5.89279e-18	7.87149e-17
POLR2H	23.2378	-1.4941	0.173057	-8.63358	5.94621e-18	7.93701e-17
TM2D1	95.6271	-0.773508	0.0896151	-8.63145	6.05779e-18	8.08001e-17
EIF4A3	31.4609	-1.26985	0.147164	-8.62882	6.19883e-18	8.26208e-17
SEC61G	57.3307	-2.59051	0.300432	-8.6226	6.54511e-18	8.71723e-17
LDHA	476.801	-2.11433	0.245221	-8.62214	6.57156e-18	8.74605e-17
KLHDC2	177.857	-0.661712	0.0767546	-8.62115	6.62873e-18	8.81567e-17
ANKRD26	577.495	0.791513	0.0918126	8.62096	6.63934e-18	8.82333e-17
AC126696.2	25.5013	-2.12122	0.24606	-8.62074	6.65204e-18	8.83376e-17
ATXN7	311.695	0.720557	0.0835956	8.61956	6.72105e-18	8.91888e-17
CEP104	970.576	0.892533	0.103579	8.61696	6.87556e-18	9.11726e-17
AL161716.1	804.11	1.55039	0.180063	8.61026	7.28936e-18	9.65893e-17
ZNF516	389.358	0.906762	0.105371	8.60545	7.60151e-18	1.00652e-16
MAGEF1	44.2066	-1.52156	0.176829	-8.60468	7.65311e-18	1.01262e-16
TSPO	15.7306	-2.60813	0.303159	-8.60318	7.7536e-18	1.02517e-16
ZNF721	221.993	0.67113	0.0780295	8.60098	7.90377e-18	1.04426e-16
MOAP1	101.448	-1.30264	0.151482	-8.59933	8.01798e-18	1.05858e-16
AC116535.1	7.22462	-2.3745	0.276271	-8.59483	8.33895e-18	1.10016e-16
P3H3	165.163	-0.843906	0.0981997	-8.59377	8.41591e-18	1.10951e-16
DMAC2	42.0356	-1.28049	0.149053	-8.59079	8.6372e-18	1.13786e-16
NDRG2	18.5841	-2.18515	0.254385	-8.58991	8.70388e-18	1.14581e-16
NGDN	42.1254	-0.881774	0.102668	-8.58863	8.80106e-18	1.15777e-16
MAGED2	34.9068	-1.66829	0.194261	-8.5879	8.85704e-18	1.16429e-16
CACNA1G	4.70333	-3.12721	0.364166	-8.58731	8.9026e-18	1.16943e-16
NOSIP	103.821	-0.858433	0.100044	-8.58058	9.43998e-18	1.23912e-16
HIRIP3	24.9105	-1.50764	0.175722	-8.57967	9.51416e-18	1.24796e-16
SQLE	37.0864	-1.70296	0.198571	-8.5761	9.81439e-18	1.28641e-16
CDC26	56.6056	-1.52053	0.177304	-8.57584	9.8367e-18	1.28841e-16
NT5C3B	44.5158	-1.13859	0.132813	-8.57287	1.0094e-17	1.32116e-16
AP1B1	208.879	-0.728965	0.0850817	-8.56782	1.05461e-17	1.37934e-16
PCYOX1	29.2372	-1.37734	0.16077	-8.56719	1.06043e-17	1.38595e-16
AL357153.2	255.063	1.15794	0.135184	8.56564	1.07473e-17	1.40364e-16
TMED10	90.1153	-0.717704	0.0838035	-8.56414	1.08888e-17	1.42109e-16
UBQLN2	34.1272	-1.15193	0.134532	-8.56252	1.10424e-17	1.44011e-16
PQBP1	48.7666	-1.348	0.157499	-8.55874	1.14108e-17	1.48709e-16
AIP	22.5519	-1.91743	0.224057	-8.55775	1.15089e-17	1.49772e-16
MRPS23	86.8867	-1.24401	0.145365	-8.5578	1.15042e-17	1.49772e-16
AP1M1	35.038	-0.932281	0.108952	-8.55681	1.16029e-17	1.50888e-16
MAGEH1	13.7108	-2.00512	0.234495	-8.55082	1.2222e-17	1.58825e-16
TMED1	13.617	-1.71545	0.200644	-8.54971	1.23401e-17	1.60245e-16
RHOB	10.9618	-2.78322	0.325548	-8.54934	1.23794e-17	1.60641e-16
SERPINH1	1.51591	-4.46393	0.522165	-8.54889	1.24278e-17	1.61154e-16
VWA8	1126.27	0.711333	0.0832095	8.5487	1.2448e-17	1.61301e-16
OAF	8.82763	-3.78449	0.442805	-8.54662	1.26747e-17	1.64121e-16
PTK2	755.358	0.585057	0.068498	8.54122	1.3281e-17	1.7185e-16
AK3	236.504	0.766794	0.089796	8.53929	1.3505e-17	1.74624e-16
BBS1	148.436	0.848191	0.09934	8.53826	1.36255e-17	1.76056e-16
FAM53C	78.0829	-1.22861	0.143959	-8.53445	1.40818e-17	1.81824e-16
HSBP1L1	58.7492	-0.982024	0.115069	-8.53422	1.41102e-17	1.8206e-16
MEGF11	285.752	1.58778	0.186092	8.53223	1.43559e-17	1.85099e-16
CD38	160.797	2.07093	0.242756	8.53089	1.45225e-17	1.87115e-16
PPP1R8	29.0598	-1.12549	0.13194	-8.53033	1.45937e-17	1.87899e-16
LSM10	12.046	-1.74044	0.204066	-8.52882	1.47854e-17	1.90232e-16
HTATSF1	33.2683	-1.59144	0.186621	-8.52769	1.49305e-17	1.91964e-16
TTYH1	27.24	-1.84412	0.21633	-8.52458	1.53359e-17	1.97036e-16
GRIA1	10.9952	-3.05757	0.358721	-8.52355	1.54733e-17	1.98662e-16
PHB2	36.1838	-1.52661	0.179161	-8.52085	1.58386e-17	2.03209e-16
TBX2-AS1	13.5758	-3.15222	0.370012	-8.51923	1.60622e-17	2.05931e-16
ZSCAN30	51.8874	1.23341	0.144808	8.51757	1.62943e-17	2.0876e-16
DHRS3	235.885	-0.90276	0.105997	-8.51683	1.63985e-17	2.09947e-16
PTOV1	77.0338	-0.928017	0.108977	-8.51575	1.65513e-17	2.11754e-16
SLAIN1	233.824	0.913858	0.107345	8.51327	1.69095e-17	2.16185e-16
COG7	167.029	0.680957	0.0799956	8.51244	1.70316e-17	2.17593e-16
JAGN1	22.0846	-1.90421	0.223819	-8.5078	1.7726e-17	2.26306e-16
DANT2	510.051	0.857989	0.10085	8.50761	1.77551e-17	2.26518e-16
USP12	267.107	0.675485	0.0794144	8.50582	1.80313e-17	2.2988e-16
KEAP1	20.4162	-1.37479	0.161634	-8.50559	1.80672e-17	2.30176e-16
CD59	76.6052	-1.41387	0.166259	-8.50403	1.83116e-17	2.33126e-16
SPCS2	166.13	-0.987324	0.116105	-8.5037	1.83641e-17	2.33631e-16
CAMK4	10.2368	-2.93036	0.34484	-8.49774	1.93317e-17	2.4577e-16
AC004054.1	101.184	2.03005	0.23897	8.495	1.97927e-17	2.51454e-16
HACE1	279.731	0.759044	0.0893615	8.49409	1.99495e-17	2.5327e-16
IL6ST	105.035	-1.01562	0.119582	-8.49308	2.01238e-17	2.55304e-16
CFAP70	209.468	0.852056	0.10033	8.49251	2.02214e-17	2.56363e-16
YIF1B	17.5605	-1.43481	0.168966	-8.49173	2.03581e-17	2.57917e-16
SNAPIN	35.7966	-1.45024	0.170862	-8.48783	2.10537e-17	2.66544e-16
TMEM165	138.355	-0.680648	0.0802176	-8.48502	2.15677e-17	2.7286e-16
AC073333.1	28.9367	-1.88898	0.222684	-8.48278	2.19867e-17	2.77969e-16
KRTCAP2	55.255	-2.08496	0.245871	-8.4799	2.25382e-17	2.84743e-16
AC110285.2	87.0149	1.70909	0.201579	8.4785	2.28107e-17	2.87986e-16
LSAMP-AS1	2.41198	-3.78198	0.446176	-8.47641	2.32241e-17	2.93001e-16
LINC01176	70.7102	1.28299	0.151378	8.47545	2.34169e-17	2.95229e-16
GRID2	34.6695	-3.98045	0.46987	-8.47138	2.42494e-17	3.05513e-16
AL031280.1	205.184	-1.06407	0.125662	-8.46768	2.5032e-17	3.15154e-16
ZCCHC9	35.3039	-1.01508	0.119893	-8.46653	2.52811e-17	3.18069e-16
TMEM138	70.6613	-0.991068	0.11708	-8.46487	2.56433e-17	3.22403e-16
PBDC1	18.7881	-1.72557	0.203857	-8.46463	2.56977e-17	3.22864e-16
RGR	67.1486	-1.95479	0.230967	-8.4635	2.59476e-17	3.25778e-16
GSTO1	39.8662	-2.00453	0.236861	-8.46288	2.60857e-17	3.27287e-16
ASL	37.2906	-1.33536	0.157823	-8.46113	2.64801e-17	3.31777e-16
OSBP2	282.069	-0.859433	0.101573	-8.4612	2.64639e-17	3.31777e-16
IGF1	6.46882	-2.78387	0.329022	-8.46104	2.64996e-17	3.31792e-16
VPS13C	693.588	0.865419	0.102317	8.45819	2.71548e-17	3.39763e-16
HPF1	24.3847	-1.58122	0.187008	-8.45536	2.78217e-17	3.47867e-16
UGP2	109.398	-0.72198	0.0854224	-8.45188	2.86644e-17	3.58157e-16
EGLN2	14.7547	-1.42671	0.168812	-8.45142	2.87781e-17	3.5933e-16
VSX1	11.4831	-3.06265	0.362397	-8.45108	2.88617e-17	3.60127e-16
CST3	68.4607	-3.05225	0.361174	-8.4509	2.89072e-17	3.60448e-16
DOCK9	603.807	0.829553	0.0981787	8.44942	2.92756e-17	3.64791e-16
ZNHIT2	8.97069	-1.85449	0.219537	-8.44727	2.98182e-17	3.71298e-16
EGFLAM	2445.69	0.692168	0.0819892	8.44218	3.11467e-17	3.87575e-16
SMIM20	28.3099	-1.52068	0.180162	-8.44065	3.15572e-17	3.92414e-16
MRFAP1	75.0269	-2.26162	0.267981	-8.43948	3.1876e-17	3.96107e-16
BRD1	66.7412	1.20929	0.143446	8.43026	3.44897e-17	4.28295e-16
ARID1B	1262.26	0.66128	0.0784455	8.4298	3.46245e-17	4.29675e-16
LINC02242	451.531	2.37939	0.282284	8.42907	3.48434e-17	4.31802e-16
PRMT1	128.417	-1.27707	0.151507	-8.42912	3.48265e-17	4.31802e-16
PEX5L-AS1	82.561	2.28455	0.2711	8.42697	3.54726e-17	4.393e-16
LNP1	218.084	-1.1053	0.131261	-8.42066	3.74384e-17	4.63328e-16
LRIF1	109.573	-1.12779	0.133961	-8.4188	3.80353e-17	4.70395e-16
TOB1	86.0873	-1.21399	0.144201	-8.4187	3.80675e-17	4.70474e-16
RBMX2	21.3188	-1.5257	0.181242	-8.41804	3.82837e-17	4.72825e-16
PROM1	2880.01	0.676869	0.0805116	8.4071	4.20255e-17	5.18685e-16
RPL7A	267.568	-2.69006	0.319987	-8.40677	4.21443e-17	5.19799e-16
AGBL4	3826.87	0.740503	0.0880929	8.40594	4.24452e-17	5.23155e-16
LYPLA2	19.0489	-1.78409	0.21229	-8.40401	4.315e-17	5.31481e-16
NOVA1	17.1852	-2.63912	0.3141	-8.40218	4.38252e-17	5.39433e-16
SLC35F1	27.7674	-1.89286	0.225303	-8.40142	4.41099e-17	5.4257e-16
AC104117.3	8.98402	-2.77406	0.330219	-8.40068	4.43917e-17	5.45667e-16
TMEM126B	66.7484	-1.08142	0.128788	-8.39686	4.58576e-17	5.63305e-16
SMCR5	45.0422	-1.78092	0.212118	-8.39588	4.62426e-17	5.6765e-16
MORF4L2	125.328	-0.937347	0.111647	-8.39563	4.63399e-17	5.68462e-16
B3GALNT2	700.183	0.708887	0.0844655	8.39262	4.75413e-17	5.82806e-16
ZNF580	22.7474	-1.55986	0.185922	-8.38989	4.86611e-17	5.96132e-16
ETV2	3.50144	-2.63193	0.31383	-8.38646	5.00991e-17	6.13334e-16
TAGLN2	16.7323	-2.24512	0.267806	-8.38337	5.14342e-17	6.29256e-16
SNRNP25	14.2774	-2.21186	0.263863	-8.38259	5.17757e-17	6.33007e-16
RBM23	166.984	-0.796127	0.094977	-8.38231	5.18993e-17	6.34092e-16
LIX1	9.56423	-3.14014	0.374655	-8.38143	5.22867e-17	6.37967e-16
VTN	183.939	-3.09446	0.369201	-8.38151	5.22551e-17	6.37967e-16
CDK5RAP3	66.5357	-1.07215	0.127933	-8.38061	5.26554e-17	6.42036e-16
NEU1	17.2879	-1.63086	0.194661	-8.37794	5.38609e-17	6.56294e-16
CARD19	38.757	-1.10806	0.13231	-8.37469	5.53714e-17	6.74248e-16
TCEAL1	15.5692	-1.59491	0.190451	-8.37437	5.55193e-17	6.75596e-16
DNTTIP2	21.966	-1.46473	0.174943	-8.3726	5.63628e-17	6.85402e-16
RPS11	236.605	-2.69861	0.322334	-8.37209	5.6606e-17	6.87899e-16
CHMP3	55.2596	-1.09791	0.131179	-8.36954	5.78438e-17	7.02472e-16
PITPNA-AS1	18.3408	-1.69917	0.203031	-8.369	5.81087e-17	7.05218e-16
RPTOR	271.522	0.762484	0.0911411	8.36598	5.96195e-17	7.2307e-16
SV2B	1113.55	0.616035	0.0736599	8.36324	6.102e-17	7.39562e-16
C17orf49	18.6047	-2.13988	0.255876	-8.36293	6.11778e-17	7.40928e-16
SYAP1	55.4074	-1.13877	0.13617	-8.36286	6.12142e-17	7.40928e-16
ZNF511	22.7506	-1.28361	0.153514	-8.3615	6.19283e-17	7.49073e-16
NDUFV2	414.18	-0.996159	0.119138	-8.36137	6.1992e-17	7.49345e-16
TPGS2	27.4925	-1.45504	0.174043	-8.36024	6.25892e-17	7.56061e-16
GUCA1C	1584.58	-0.722043	0.086377	-8.3592	6.31432e-17	7.62246e-16
SPINT2	16.3804	-1.76622	0.211295	-8.35905	6.32267e-17	7.62749e-16
ANP32E	159.284	-1.07539	0.128685	-8.35674	6.44778e-17	7.77325e-16
ATP6V1G2	28.8683	-2.23717	0.267736	-8.35588	6.49452e-17	7.82441e-16
DENND5A	589.761	0.809565	0.0968879	8.35569	6.50522e-17	7.82693e-16
TTC7B	331.844	0.867111	0.103775	8.35571	6.50386e-17	7.82693e-16
AP001160.3	5.34266	-2.25937	0.270448	-8.35418	6.58914e-17	7.92266e-16
TOX3	7.49849	-3.54559	0.42445	-8.35339	6.63323e-17	7.9704e-16
CCDC93	203.302	0.740307	0.0886329	8.3525	6.68338e-17	8.02536e-16
RERE	3413.83	0.598852	0.0717048	8.35163	6.73256e-17	8.07907e-16
MTDH	448.804	-0.426215	0.0510454	-8.34974	6.84144e-17	8.20432e-16
AC008443.5	13.0295	-2.05837	0.246531	-8.34935	6.86424e-17	8.22623e-16
PPT1	39.9872	-1.10258	0.132094	-8.347	7.00207e-17	8.38587e-16
PPIB	38.4256	-1.42764	0.171051	-8.34627	7.04522e-17	8.432e-16
VPS29	198.999	-0.884038	0.105923	-8.34608	7.05644e-17	8.43987e-16
TMEM232	1003.28	0.867668	0.104025	8.34092	7.3716e-17	8.81103e-16
DNAJC7	153.033	-0.67449	0.0808816	-8.33922	7.47818e-17	8.93255e-16
ITM2C	284.228	-1.80184	0.216117	-8.33737	7.59589e-17	9.06719e-16
PRKCA	27.9556	-3.07463	0.368801	-8.33682	7.63133e-17	9.10351e-16
AP2M1	200.967	-1.08029	0.129603	-8.33531	7.72935e-17	9.2144e-16
NT5DC1	228.801	0.703903	0.0844692	8.33325	7.86518e-17	9.37018e-16
LINC02320	194.138	1.19619	0.143566	8.33204	7.94627e-17	9.46059e-16
RAB35	34.6302	-1.05458	0.12658	-8.33137	7.99149e-17	9.50821e-16
RPS3A	424.679	-2.87964	0.345839	-8.32653	8.32439e-17	9.8978e-16
TULP1	793.36	-0.687081	0.0825829	-8.31989	8.80471e-17	1.04621e-15
RPAIN	83.1076	-0.776452	0.0933328	-8.31917	8.85788e-17	1.05184e-15
GPHN	3293.86	0.639046	0.0769059	8.30944	9.6152e-17	1.14102e-15
TMEM183A	32.9311	-1.09455	0.131727	-8.30921	9.63383e-17	1.14249e-15
TYW3	33.5724	-1.16369	0.140062	-8.30835	9.70436e-17	1.1501e-15
RDX	184.381	-0.572561	0.0689241	-8.30712	9.80492e-17	1.16126e-15
AL731577.2	124.01	1.04852	0.126238	8.30587	9.90891e-17	1.17281e-15
FAP	3.62408	-4.30939	0.519078	-8.30202	1.02358e-16	1.21071e-15
FMNL3	134.033	0.800405	0.0964316	8.30024	1.03904e-16	1.2282e-15
AGTPBP1	1634.12	0.518165	0.0624341	8.2994	1.04636e-16	1.23606e-15
PHF21A	457.176	0.692387	0.0834736	8.29469	1.08868e-16	1.28521e-15
C11orf1	20.5031	-1.50745	0.181826	-8.29066	1.12621e-16	1.32866e-15
LINC01184	579.852	0.760019	0.0916891	8.28909	1.1412e-16	1.345e-15
KCTD5	19.0978	-1.26904	0.153098	-8.28905	1.14154e-16	1.345e-15
MYO3A	8.54495	-3.26357	0.39374	-8.28863	1.14565e-16	1.34895e-15
MOB4	76.4104	-0.836527	0.100948	-8.28669	1.16442e-16	1.37017e-15
C1orf61	44.0338	-3.3196	0.400787	-8.28272	1.20396e-16	1.41578e-15
AC079193.2	39.7761	2.38257	0.287802	8.27853	1.24708e-16	1.46554e-15
MORN1	81.4905	1.01152	0.12219	8.27827	1.24975e-16	1.46584e-15
IMPDH2	12.5625	-1.63236	0.197184	-8.27836	1.24882e-16	1.46584e-15
FMC1	62.0396	-1.71482	0.207145	-8.27832	1.24926e-16	1.46584e-15
NSD3	375.428	0.571155	0.0689979	8.27787	1.25403e-16	1.46991e-15
TRPT1	17.9606	-1.49801	0.180996	-8.27649	1.26855e-16	1.48597e-15
RPL9	399.251	-3.07596	0.371751	-8.27425	1.29265e-16	1.51322e-15
HSPA1B	78.5259	-3.44701	0.41661	-8.27394	1.29605e-16	1.51622e-15
LINC01504	2.23148	-2.78204	0.336278	-8.27303	1.30598e-16	1.52686e-15
TMEM18	31.0146	-1.32151	0.159776	-8.27101	1.32825e-16	1.5519e-15
DCP1B	77.5295	0.919366	0.11116	8.27065	1.33233e-16	1.55567e-15
MT1F	22.2369	-4.4071	0.532904	-8.26996	1.34001e-16	1.56364e-15
ATXN1	1967.92	0.566833	0.0685916	8.26388	1.41015e-16	1.64443e-15
TFPI2	64.5073	-3.65599	0.442492	-8.26229	1.42909e-16	1.66544e-15
SLC3A2	23.5322	-1.5142	0.183326	-8.25964	1.46107e-16	1.70162e-15
CNDP2	22.9382	-1.24488	0.150734	-8.25878	1.47171e-16	1.71291e-15
CHID1	49.6928	-1.06461	0.129053	-8.24939	1.59204e-16	1.85178e-15
GPR137B	98.2681	-1.29421	0.156926	-8.24731	1.62002e-16	1.88312e-15
NSMCE1	32.6288	-1.06397	0.129064	-8.2437	1.66964e-16	1.93956e-15
RLBP1	63.355	-3.65913	0.443968	-8.24186	1.69548e-16	1.96832e-15
KCNH7	13.1121	-3.7543	0.455537	-8.24148	1.701e-16	1.97347e-15
HDDC3	13.6469	-1.94097	0.235527	-8.24095	1.70853e-16	1.98093e-15
AC025034.1	53.4649	1.676	0.203473	8.23696	1.76638e-16	2.0467e-15
DGKG	3.95	-3.23317	0.392537	-8.2366	1.77181e-16	2.05128e-15
LMTK3	14.8264	-2.13087	0.25871	-8.23654	1.77258e-16	2.05128e-15
FBXW4	135.217	0.771965	0.0937258	8.23642	1.77443e-16	2.05211e-15
TIMM10	14.2334	-2.82737	0.34333	-8.23514	1.79343e-16	2.07276e-15
C17orf58	12.3968	-1.68143	0.20424	-8.23259	1.83206e-16	2.11607e-15
CISD2	86.2753	-1.21364	0.147651	-8.21966	2.04073e-16	2.35559e-15
FAM122C	125.73	0.984992	0.119845	8.21887	2.05427e-16	2.36971e-15
SELENOM	25.9961	-2.4546	0.298771	-8.21567	2.1099e-16	2.43233e-15
PSMD6	46.6641	-1.05757	0.128731	-8.21536	2.11531e-16	2.43703e-15
POLD4	21.6845	-1.43586	0.17481	-8.21382	2.14256e-16	2.46687e-15
RBM3	56.8489	-1.76881	0.215385	-8.21229	2.17003e-16	2.4969e-15
VPS13B	520.263	0.609175	0.0741804	8.21208	2.17389e-16	2.49977e-15
ARMC8	251.145	0.527556	0.0642559	8.21024	2.20746e-16	2.53677e-15
ISCA2	28.2853	-1.4236	0.173403	-8.20978	2.21599e-16	2.54496e-15
GPATCH1	157.656	-2.38659	0.290732	-8.20887	2.23279e-16	2.56263e-15
ZBTB37	89.7945	1.24881	0.15216	8.20718	2.26443e-16	2.59731e-15
RNPS1	111.986	-0.651345	0.0793666	-8.20679	2.27181e-16	2.60413e-15
YIPF5	35.7048	-1.10744	0.134977	-8.20465	2.31263e-16	2.64925e-15
WBP1	61.725	-1.24243	0.151474	-8.20228	2.35867e-16	2.7003e-15
CHMP4B	89.417	-0.883018	0.107679	-8.2005	2.39398e-16	2.73899e-15
HSD17B10	10.2658	-1.94595	0.237335	-8.1992	2.41998e-16	2.76699e-15
PIN4	85.4576	-0.754046	0.0919775	-8.19815	2.44112e-16	2.78942e-15
CHGA	20.7971	-1.73328	0.211485	-8.19575	2.49033e-16	2.84386e-15
GMNN	15.9955	-1.27706	0.155834	-8.19499	2.50607e-16	2.86003e-15
NCL	95.2412	-1.40764	0.171786	-8.19419	2.52289e-16	2.87742e-15
LAPTM4B	583.296	-0.710162	0.0866813	-8.19279	2.5524e-16	2.90926e-15
RPL22L1	13.7502	-2.44546	0.298495	-8.19263	2.55572e-16	2.91121e-15
LINC01550	1.4917	-3.19572	0.390166	-8.19065	2.5981e-16	2.95764e-15
YWHAG	84.3236	-0.990812	0.121006	-8.18809	2.65402e-16	3.0194e-15
CCDC25	48.8084	-1.01571	0.124126	-8.18293	2.77014e-16	3.14954e-15
MANF	30.2961	-1.51765	0.185507	-8.1811	2.81275e-16	3.19598e-15
NBDY	97.3434	-0.982182	0.120072	-8.17993	2.84012e-16	3.22507e-15
LITAF	8.49382	-3.09638	0.378547	-8.17966	2.84658e-16	3.23038e-15
GNG5	24.1553	-1.77808	0.217483	-8.17575	2.94024e-16	3.33459e-15
RASGRF2	1281.27	0.656897	0.0803482	8.17563	2.94336e-16	3.33605e-15
GALT	46.8662	-0.924411	0.11309	-8.1741	2.98075e-16	3.37633e-15
KATNBL1	463.747	0.469872	0.0575148	8.16957	3.0948e-16	3.50333e-15
CDIPT	56.5156	-1.12617	0.137887	-8.16736	3.15207e-16	3.56594e-15
NOL7	75.658	-1.23845	0.151668	-8.16551	3.20078e-16	3.61879e-15
NPC1	125.519	-1.25509	0.153787	-8.16122	3.31651e-16	3.74731e-15
GRIK1	74.383	-3.95192	0.484273	-8.16052	3.33578e-16	3.76674e-15
GCHFR	17.306	-1.89884	0.232723	-8.15922	3.37183e-16	3.80272e-15
ZNF526	9.18484	-1.54102	0.188867	-8.15927	3.37043e-16	3.80272e-15
AC139887.2	120.662	1.16273	0.142512	8.15886	3.38189e-16	3.81171e-15
FAM50B	10.6121	-2.06863	0.253553	-8.15858	3.3899e-16	3.81836e-15
AK6	59.7674	-1.34561	0.164999	-8.15528	3.48382e-16	3.91929e-15
MESP1	11.6383	-2.24025	0.274699	-8.15528	3.48368e-16	3.91929e-15
AL391650.1	51.0865	-2.40881	0.295584	-8.14933	3.65937e-16	4.11425e-15
TMEM205	36.2044	-1.46411	0.179663	-8.14921	3.66295e-16	4.11572e-15
MAP3K2	347.336	0.577933	0.0709443	8.1463	3.75242e-16	4.21365e-15
DPM1	63.3321	-0.708033	0.086936	-8.1443	3.81478e-16	4.28103e-15
RANGRF	42.017	-1.23619	0.151812	-8.1429	3.85928e-16	4.3283e-15
CNTN4	39.3479	-3.50788	0.430887	-8.14108	3.9177e-16	4.39111e-15
BEX2	130.309	-1.11883	0.137468	-8.13885	3.99034e-16	4.46977e-15
ZEB1-AS1	129.907	1.06944	0.131405	8.13851	4.00171e-16	4.47975e-15
AC069185.1	11.8236	-2.15865	0.265324	-8.1359	4.0888e-16	4.57443e-15
MID1IP1	11.0845	-1.70911	0.210085	-8.13535	4.10735e-16	4.59235e-15
VIPR2	6.0472	-3.27179	0.402196	-8.13482	4.12553e-16	4.60984e-15
MRFAP1L1	23.7509	-1.53298	0.188592	-8.1286	4.34284e-16	4.84968e-15
ATAD3C	4.18829	-2.85238	0.350949	-8.12763	4.37757e-16	4.88547e-15
TEX30	10.8639	-1.66254	0.204578	-8.12668	4.41198e-16	4.92085e-15
ABHD17B	85.237	-0.818928	0.100777	-8.12618	4.43017e-16	4.93811e-15
TRPC1	529.973	0.659413	0.0811593	8.12493	4.47636e-16	4.98653e-15
SSBP1	101.352	-1.01608	0.125099	-8.12224	4.57672e-16	5.09521e-15
C4orf3	139.046	-1.95213	0.240406	-8.12016	4.65582e-16	5.1801e-15
EZR	7.62051	-2.55265	0.314372	-8.11985	4.66744e-16	5.18985e-15
ESRRG	1453.85	0.662361	0.0815771	8.11945	4.68319e-16	5.20418e-15
CCDC66	362.765	0.572215	0.0705139	8.11493	4.86084e-16	5.3983e-15
TBC1D2	25.9558	-1.4231	0.175474	-8.11002	5.06097e-16	5.61712e-15
HMGA1	32.9183	-1.50898	0.186119	-8.10763	5.16177e-16	5.7255e-15
AC008083.3	1.35123	-4.87261	0.60107	-8.10656	5.20751e-16	5.77271e-15
RABAC1	65.7243	-2.11503	0.261056	-8.10184	5.41321e-16	5.99708e-15
ARF4	74.5059	-0.878702	0.108487	-8.09961	5.51341e-16	6.10437e-15
CSDE1	180.054	-0.757932	0.0935791	-8.09937	5.52443e-16	6.11285e-15
PSMD9	70.3593	-0.7829	0.0966654	-8.09907	5.53818e-16	6.12433e-15
CCDC181	154.584	-0.859774	0.106165	-8.0985	5.56421e-16	6.14939e-15
ST3GAL1	4.6573	-2.91045	0.359514	-8.09553	5.70143e-16	6.29721e-15
NEDD4	364.912	0.684801	0.084624	8.09228	5.85578e-16	6.46375e-15
APOO	118.819	-0.60604	0.074893	-8.09208	5.86538e-16	6.47043e-15
TPP1	15.8862	-1.3445	0.166281	-8.0857	6.18102e-16	6.81449e-15
LAMP2	26.6387	-1.04659	0.129449	-8.08498	6.21769e-16	6.85076e-15
DOHH	12.4047	-1.7158	0.212261	-8.08343	6.29694e-16	6.93388e-15
MRPL11	21.2913	-1.53797	0.19031	-8.08135	6.4052e-16	7.04882e-15
GNG13	18.8319	-2.96459	0.366893	-8.08024	6.46416e-16	7.1094e-15
EPB41L4A-AS1	36.1273	-1.49932	0.185721	-8.07298	6.86037e-16	7.5406e-15
NDUFC2	178.602	-2.07292	0.256788	-8.0725	6.88728e-16	7.5656e-15
PNRC2	33.5616	-1.53677	0.19049	-8.06746	7.17738e-16	7.87951e-15
HSP90AB1	264.772	-1.97414	0.244811	-8.06394	7.38744e-16	8.10523e-15
DPH3	25.3483	-1.25755	0.155987	-8.06191	7.51108e-16	8.23592e-15
SLC8B1	7.76686	-2.32796	0.288814	-8.06043	7.60265e-16	8.3313e-15
PPID	54.8966	-1.04943	0.130233	-8.05808	7.75041e-16	8.4881e-15
GLUD1	219.752	-0.61898	0.0768348	-8.05599	7.8838e-16	8.62802e-15
COMMD9	25.7924	-1.14572	0.142221	-8.05593	7.88766e-16	8.62802e-15
RGS9	1161.66	0.623719	0.0774259	8.05569	7.90332e-16	8.63995e-15
WIF1	63.4179	-3.35917	0.417252	-8.05071	8.2318e-16	8.99364e-15
AC138123.1	4.8701	-2.48415	0.308622	-8.04918	8.33498e-16	9.1009e-15
YWHAB	115.321	-1.69832	0.211005	-8.04872	8.36677e-16	9.13012e-15
CDH11	5.32087	-3.34441	0.415756	-8.04417	8.68307e-16	9.46553e-15
PCSK1N	151.668	-2.14021	0.266058	-8.04415	8.68454e-16	9.46553e-15
RBM12B	59.3368	1.03917	0.129225	8.04154	8.87135e-16	9.66334e-15
BAG3	4.86455	-3.45982	0.430272	-8.041	8.91065e-16	9.70034e-15
CDKN2AIPNL	33.5174	-1.2475	0.155197	-8.03819	9.11768e-16	9.91977e-15
UFD1	43.4167	-0.85105	0.105881	-8.03783	9.14435e-16	9.94284e-15
EMB	971.649	0.974008	0.121199	8.03643	9.24975e-16	1.00514e-14
RASSF1	21.4458	-1.47504	0.183566	-8.03548	9.32104e-16	1.01228e-14
IGSF11	1297.45	1.1298	0.140615	8.03469	9.38164e-16	1.01826e-14
BCO2	1044.48	0.629409	0.078343	8.03402	9.43334e-16	1.02326e-14
PITPNA	48.6653	-1.10709	0.137805	-8.03369	9.45866e-16	1.02539e-14
PAUPAR	7.17861	-4.1252	0.513512	-8.03331	9.48804e-16	1.02796e-14
ALG3	15.1279	-1.52626	0.190015	-8.03232	9.56484e-16	1.03567e-14
SSR4	61.8087	-2.2655	0.282438	-8.02123	1.04691e-15	1.1329e-14
NECTIN2	23.1141	-1.2185	0.15192	-8.02069	1.05154e-15	1.13723e-14
CHMP2B	27.289	-1.33375	0.166299	-8.02017	1.05595e-15	1.14133e-14
CHRNA3	183.223	-0.877806	0.10947	-8.0187	1.06872e-15	1.15445e-14
SLC1A3	19.6365	-3.16913	0.395273	-8.01759	1.07844e-15	1.16425e-14
ANP32A	171.91	-0.730097	0.0910866	-8.01542	1.09761e-15	1.18424e-14
YTHDC2	306.299	0.598679	0.0747013	8.01432	1.10751e-15	1.19422e-14
LINC01278	374.914	0.6898	0.0861092	8.01076	1.14e-15	1.22853e-14
HSD17B7	47.9637	-1.73353	0.216563	-8.00475	1.19711e-15	1.28931e-14
SCYL1	26.3475	-1.16378	0.145392	-8.00442	1.20029e-15	1.29197e-14
AC091078.1	4.41803	-2.46601	0.30818	-8.00186	1.22552e-15	1.31834e-14
CLRN1	6.69058	-3.32324	0.415399	-8.00012	1.24293e-15	1.33628e-14
SMIM4	74.6866	-0.954954	0.119389	-7.99868	1.25757e-15	1.35122e-14
HSPB1	68.2192	-4.09271	0.511724	-7.99788	1.26577e-15	1.35922e-14
ACP5	10.0523	-2.09732	0.262549	-7.9883	1.36815e-15	1.4683e-14
NBEA	1986.62	0.678052	0.0849004	7.98644	1.38889e-15	1.48968e-14
KLF10	3.55988	-3.21063	0.402055	-7.98556	1.39889e-15	1.49952e-14
AC080112.4	4.71721	-2.74409	0.343698	-7.98403	1.41633e-15	1.51732e-14
SLC35A4	11.4016	-1.85045	0.23179	-7.9833	1.42471e-15	1.52539e-14
MYL6B	54.2969	-1.10292	0.138218	-7.97952	1.46905e-15	1.57195e-14
AP000640.2	3.5527	-2.46311	0.308719	-7.97849	1.48131e-15	1.58413e-14
PERP	24.3287	-1.67952	0.210645	-7.97325	1.54557e-15	1.65188e-14
AC007285.1	48.9748	1.18169	0.148289	7.96886	1.60142e-15	1.71057e-14
THAP10	9.33989	-1.78567	0.224088	-7.9686	1.60477e-15	1.71313e-14
OXLD1	25.0989	-1.40578	0.176439	-7.96749	1.61935e-15	1.72769e-14
AC099792.1	4.15992	-4.33209	0.544037	-7.96285	1.68115e-15	1.79257e-14
ABHD5	39.1443	-0.974682	0.122429	-7.96121	1.70365e-15	1.8155e-14
DENND5B	632.606	0.58289	0.0732354	7.95913	1.73249e-15	1.84515e-14
MPV17L2	10.3354	-2.00177	0.251577	-7.9569	1.76397e-15	1.87758e-14
BEX1	87.9634	-2.14054	0.269039	-7.95626	1.77318e-15	1.88628e-14
LSAMP	70.6628	-3.70231	0.465408	-7.95498	1.79158e-15	1.90473e-14
SYT14	324.979	0.594002	0.0746792	7.95405	1.8051e-15	1.91799e-14
TBC1D19	274.612	0.503481	0.06331	7.95263	1.82599e-15	1.93905e-14
ZNF593	6.48552	-2.49809	0.314216	-7.95024	1.86154e-15	1.97564e-14
AC087457.1	258.45	0.912399	0.114823	7.94613	1.92424e-15	2.041e-14
CEP120	208.87	0.910545	0.114596	7.9457	1.93099e-15	2.04696e-14
WFDC1	5.79637	-2.89631	0.364539	-7.94513	1.93981e-15	2.05511e-14
CAMTA1	1309.15	0.457809	0.0576278	7.94424	1.95391e-15	2.06885e-14
SLC9A3R1	6.21032	-2.06077	0.259417	-7.94386	1.9598e-15	2.07387e-14
SOX15	11.9529	-1.67429	0.210821	-7.94173	1.99381e-15	2.10863e-14
PPP1R11	32.7054	-1.20031	0.151173	-7.93994	2.02278e-15	2.13803e-14
RGMB	8.46114	-1.69275	0.213207	-7.93946	2.03056e-15	2.145e-14
STK32C	34.3852	-1.69489	0.21348	-7.93934	2.03256e-15	2.14587e-14
TMEM141	22.3323	-1.99093	0.250788	-7.93871	2.04299e-15	2.15563e-14
KIAA0895L	124.665	1.22551	0.154446	7.9349	2.1067e-15	2.22156e-14
MRPS35	54.4623	-0.790053	0.09958	-7.93386	2.12446e-15	2.23899e-14
SPATA6	487.995	0.784888	0.0989593	7.93142	2.16657e-15	2.28205e-14
SELENOP	14.2607	-3.47993	0.43884	-7.92983	2.19449e-15	2.31013e-14
SLN	19.6268	-4.69136	0.591719	-7.92836	2.22066e-15	2.33632e-14
MT2A	76.7578	-4.07715	0.514427	-7.92561	2.27029e-15	2.38715e-14
USP1	58.6775	-0.974417	0.122986	-7.92296	2.31914e-15	2.43711e-14
IFT74	182.08	0.575775	0.072691	7.92086	2.3587e-15	2.47725e-14
SEZ6	60.4748	-0.915323	0.115593	-7.91849	2.4042e-15	2.52357e-14
MRPL3	52.3758	-0.917639	0.115915	-7.91647	2.44344e-15	2.56328e-14
AC022634.2	40.4931	2.80038	0.353784	7.91551	2.46243e-15	2.58171e-14
CCND3	11.6026	-2.09534	0.264738	-7.91477	2.47713e-15	2.59563e-14
DUSP1	51.9757	-3.50946	0.443617	-7.91102	2.55296e-15	2.67355e-14
TFPT	15.9314	-1.33479	0.168772	-7.90884	2.59806e-15	2.71922e-14
TERF2IP	428.462	-1.10077	0.139213	-7.9071	2.63462e-15	2.7559e-14
CES2	30.1493	-1.155	0.146117	-7.90466	2.68658e-15	2.80863e-14
DGUOK	56.8244	-0.844238	0.106825	-7.90302	2.72225e-15	2.84428e-14
WDR74	12.2946	-1.53285	0.194021	-7.90044	2.77926e-15	2.90217e-14
AL161757.4	1492.07	1.0569	0.133779	7.9003	2.78234e-15	2.90373e-14
ODC1	39.0353	-1.33331	0.168777	-7.89985	2.79245e-15	2.90927e-14
KIF21A	1117.48	0.614634	0.0778022	7.89996	2.78986e-15	2.90927e-14
MED29	27.733	-1.07977	0.136681	-7.8999	2.79134e-15	2.90927e-14
PLEKHB1	1064.99	-1.00263	0.127081	-7.88972	3.02876e-15	3.15366e-14
GADD45G	22.7876	-2.57789	0.326797	-7.88836	3.06173e-15	3.18617e-14
GSTM3	23.9056	-1.84297	0.233681	-7.88672	3.10241e-15	3.22664e-14
POLR1D	69.5829	-0.839319	0.106462	-7.88371	3.1779e-15	3.30327e-14
AP005131.5	70.6526	1.73366	0.21995	7.88206	3.22027e-15	3.3454e-14
CDKN2AIP	13.3895	-1.58785	0.201518	-7.87941	3.28936e-15	3.41522e-14
MAT2B	24.674	-1.35245	0.171732	-7.87534	3.39823e-15	3.52624e-14
SDF2L1	6.70318	-2.47027	0.31368	-7.87512	3.4042e-15	3.53043e-14
HIF3A	7.95321	-3.99272	0.507039	-7.87458	3.41892e-15	3.54367e-14
PKIB	192.053	-0.678156	0.086162	-7.87071	3.52644e-15	3.65303e-14
PNMA1	28.6217	-1.53491	0.195023	-7.8704	3.53515e-15	3.65997e-14
ACTR10	111.318	-0.789111	0.100277	-7.8693	3.56644e-15	3.69026e-14
ZNF141	95.6611	0.922352	0.117222	7.86842	3.59141e-15	3.71398e-14
NME9	119.118	1.06645	0.135574	7.86616	3.65681e-15	3.77947e-14
ZBTB25	64.1652	1.06485	0.135381	7.86557	3.67412e-15	3.7952e-14
PRR7	16.9347	-1.53623	0.195315	-7.86537	3.67993e-15	3.79905e-14
TUBB4B	507.599	-1.34117	0.170634	-7.85994	3.84318e-15	3.96532e-14
CTNNA2	87.8639	-3.22883	0.410909	-7.85777	3.91019e-15	4.03217e-14
SDCBP	19.9467	-1.8635	0.237165	-7.85738	3.9225e-15	4.04258e-14
LAMTOR3	37.1961	-0.986583	0.125571	-7.85679	3.94098e-15	4.05932e-14
VDAC1	286.573	-1.85382	0.236005	-7.85502	3.99693e-15	4.11462e-14
NUCKS1	281.658	-0.816029	0.10391	-7.85325	4.05407e-15	4.17108e-14
ZNF608	529.816	0.636686	0.0810913	7.85147	4.11179e-15	4.22807e-14
CYB5B	65.0266	-0.656327	0.0835961	-7.85117	4.1218e-15	4.23597e-14
IGFL4	124.581	1.3667	0.174106	7.84984	4.16569e-15	4.27866e-14
TMEM37	4.36326	-3.13774	0.399831	-7.84766	4.23856e-15	4.35104e-14
LMCD1-AS1	1042.34	0.762045	0.0971555	7.84356	4.3796e-15	4.49329e-14
DNAJC4	22.8639	-1.29371	0.164952	-7.84294	4.4013e-15	4.51301e-14
SNX10	57.6902	-1.23274	0.157208	-7.84146	4.45353e-15	4.56399e-14
VPS25	20.9868	-1.64958	0.210555	-7.83447	4.7084e-15	4.82246e-14
CPA6	8.91505	-3.20994	0.409753	-7.83386	4.7313e-15	4.84319e-14
MCRIP2	24.2005	-1.42098	0.181432	-7.83204	4.80027e-15	4.91102e-14
AC092828.1	24.0086	2.28238	0.291523	7.82914	4.91199e-15	5.0225e-14
PFDN1	86.7742	-0.703699	0.0898837	-7.829	4.91781e-15	5.02562e-14
PDZRN4	6.48165	-3.37937	0.43174	-7.82732	4.9837e-15	5.09009e-14
MRPL9	25.1377	-1.21964	0.155884	-7.82401	5.11659e-15	5.22289e-14
HNRNPC	1139.53	0.569731	0.0728272	7.82306	5.15559e-15	5.25975e-14
PEX5L-AS2	156.677	2.5081	0.320676	7.8213	5.22824e-15	5.33087e-14
SDF2	37.2053	-1.05029	0.134367	-7.81654	5.42952e-15	5.533e-14
LARP7	80.9429	-1.00864	0.12905	-7.81584	5.45968e-15	5.56061e-14
TCEA1	172.6	-0.600049	0.0767772	-7.81546	5.47628e-15	5.5744e-14
AC092675.1	218.357	0.944742	0.120889	7.81499	5.49679e-15	5.59215e-14
BCAT1	17.694	-2.8972	0.370764	-7.81414	5.53374e-15	5.62659e-14
NEBL	972.547	1.03011	0.131862	7.81203	5.62731e-15	5.71853e-14
FRZB	104.232	-2.34752	0.300507	-7.81187	5.63448e-15	5.72262e-14
TUBA1A	133.569	-2.27809	0.29165	-7.81104	5.67171e-15	5.75721e-14
DPCD	126.713	-1.11682	0.143071	-7.80605	5.90062e-15	5.98623e-14
SLC6A11	3.64797	-3.21639	0.412243	-7.80216	6.08543e-15	6.17028e-14
QDPR	40.6607	-1.39027	0.178209	-7.80131	6.12699e-15	6.20896e-14
SLC31A2	11.8631	-1.50909	0.193594	-7.79515	6.43317e-15	6.5156e-14
BECN1	23.0477	-1.04128	0.133625	-7.7926	6.56434e-15	6.64475e-14
DUSP5	28.3768	-1.39899	0.179561	-7.7912	6.63774e-15	6.71531e-14
SLC35B1	36.801	-1.06662	0.136921	-7.79002	6.69992e-15	6.77444e-14
ZNF358	20.9468	-1.52466	0.19574	-7.78924	6.74128e-15	6.81248e-14
SAT2	158.448	-0.936031	0.120195	-7.7876	6.82957e-15	6.89787e-14
AC005726.5	48.176	-1.75136	0.224897	-7.78738	6.84149e-15	6.90606e-14
TBC1D24	77.7546	1.25498	0.161163	7.78698	6.86321e-15	6.92415e-14
HSD17B8	13.7919	-1.6113	0.206939	-7.78636	6.89688e-15	6.95425e-14
KIAA0319L	283.191	0.559556	0.0719029	7.78211	7.13222e-15	7.18756e-14
CDHR3	3.62035	-3.18906	0.409866	-7.78072	7.21123e-15	7.26317e-14
TMEM108	3772.33	0.733657	0.0943024	7.77984	7.2619e-15	7.31015e-14
RIDA	35.1422	-1.18887	0.152916	-7.7747	7.56293e-15	7.60897e-14
ZNF622	19.5244	-1.54063	0.198165	-7.77445	7.57742e-15	7.61933e-14
DNMBP	280.532	0.537688	0.0691731	7.77307	7.66059e-15	7.6987e-14
WDR33	271.149	0.511599	0.0658187	7.77286	7.67347e-15	7.70739e-14
MYLK-AS1	63.5605	1.05617	0.135953	7.76863	7.93398e-15	7.96465e-14
LMAN2	44.8411	-1.01755	0.13101	-7.767	8.03684e-15	8.06346e-14
APOE	171.614	-3.37701	0.434835	-7.76619	8.08819e-15	8.1105e-14
SEC11C	105.068	-1.79054	0.230575	-7.76555	8.12889e-15	8.14682e-14
CCSER1	7961	0.706171	0.0909541	7.76404	8.22641e-15	8.24001e-14
SCOC	82.4658	-1.76436	0.227343	-7.7608	8.43927e-15	8.44856e-14
KLC2	40.0795	-1.1634	0.149955	-7.75835	8.60407e-15	8.6088e-14
DDX19B	58.1715	-0.792753	0.102184	-7.75809	8.62201e-15	8.62201e-14
ELOVL2	361.176	0.570615	0.0735886	7.75413	8.89529e-15	8.8904e-14
AC009053.3	65.5812	1.54601	0.199455	7.75121	9.10232e-15	9.09232e-14
RIMS1	20.3434	-2.79643	0.360847	-7.74963	9.21627e-15	9.20109e-14
ANKRD39	18.9818	-1.10953	0.143217	-7.74718	9.39532e-15	9.37469e-14
SCCPDH	63.5132	-0.762318	0.098429	-7.74485	9.56942e-15	9.54317e-14
KDM4C	1053.64	0.690333	0.0891389	7.74446	9.59918e-15	9.56761e-14
BICRAL	394.597	0.480973	0.0621083	7.74411	9.62544e-15	9.58852e-14
MDP1	30.6136	-1.21365	0.156748	-7.74268	9.73446e-15	9.69181e-14
LINC01896	225.873	0.904291	0.116798	7.74232	9.76157e-15	9.71349e-14
RALGPS2	1273.89	0.573436	0.0740672	7.74211	9.77788e-15	9.72439e-14
SRSF8	43.7375	-1.37887	0.178106	-7.74186	9.79767e-15	9.73874e-14
KLHDC3	40.0831	-1.08116	0.139667	-7.74099	9.86494e-15	9.80025e-14
AC091729.3	12.4236	-1.42517	0.184141	-7.73957	9.97573e-15	9.9049e-14
MRPS2	11.5659	-1.57636	0.203712	-7.73816	1.00869e-14	1.00099e-13
ARF3	48.6013	-1.15852	0.149784	-7.73461	1.03721e-14	1.02872e-13
ZNF571	89.9227	0.91937	0.11888	7.7336	1.0455e-14	1.03637e-13
GABRB1	8.08562	-3.4847	0.450716	-7.73146	1.06318e-14	1.05333e-13
RARRES2	18.5808	-3.34656	0.432906	-7.73045	1.07163e-14	1.06113e-13
TAF1	243.163	0.567761	0.0734799	7.72676	1.10321e-14	1.0918e-13
MMADHC	36.2217	-1.14049	0.147604	-7.72667	1.10394e-14	1.09192e-13
MARCKSL1	17.0558	-2.89903	0.375238	-7.72584	1.11119e-14	1.09851e-13
RBBP7	57.4082	-0.799608	0.103547	-7.72218	1.14355e-14	1.12987e-13
NSA2	48.5022	-1.02916	0.133311	-7.72	1.16326e-14	1.14873e-13
DIAPH2-AS1	750.501	1.09035	0.141343	7.71421	1.21731e-14	1.20145e-13
LRRC59	12.3426	-1.66639	0.216159	-7.70907	1.26742e-14	1.25023e-13
FOS	73.7507	-4.28654	0.5561	-7.70822	1.27586e-14	1.25787e-13
C8orf33	34.2185	-1.18222	0.15341	-7.70631	1.29509e-14	1.27614e-13
SNHG22	91.3191	1.16317	0.151029	7.70161	1.34362e-14	1.32324e-13
MCUR1	331.597	-0.565728	0.0734668	-7.70046	1.35576e-14	1.33447e-13
INPP5K	31.3208	-1.3731	0.178378	-7.69767	1.38571e-14	1.36322e-13
FH	54.457	-1.01872	0.132362	-7.69646	1.39889e-14	1.37544e-13
ADAMTS20	4.04499	-2.91689	0.379089	-7.69447	1.42078e-14	1.39621e-13
CADM2-AS1	89.9218	1.65166	0.214771	7.69036	1.46717e-14	1.44101e-13
SLC18A2	9.22554	-1.96872	0.25604	-7.68912	1.48154e-14	1.45434e-13
NOC4L	8.12243	-1.62625	0.211544	-7.68754	1.49988e-14	1.47155e-13
GLUL	148.92	-2.86502	0.372785	-7.68547	1.52441e-14	1.49481e-13
AC012640.1	4.48729	-2.20738	0.287283	-7.68364	1.5463e-14	1.51546e-13
TOX	9.68206	-2.80446	0.365028	-7.68286	1.5557e-14	1.52384e-13
WDFY3	508.002	0.544663	0.0709209	7.67986	1.59257e-14	1.55829e-13
MALSU1	43.2796	-0.853628	0.111151	-7.67988	1.59238e-14	1.55829e-13
AC026704.1	65.3678	1.45095	0.188956	7.67878	1.60609e-14	1.57067e-13
MKRN3	144.238	0.84964	0.110669	7.67732	1.62452e-14	1.58784e-13
HSPA1L	4.62288	-2.90122	0.377968	-7.67585	1.64323e-14	1.60526e-13
BACH2	1325.43	0.786887	0.102516	7.67574	1.64462e-14	1.60576e-13
DKK3	51.2628	-2.74392	0.357844	-7.66792	1.74809e-14	1.70586e-13
LRRC63	150.367	1.11137	0.144957	7.66685	1.76272e-14	1.71921e-13
HSD11B1L	18.7934	-1.29901	0.169617	-7.6585	1.88119e-14	1.83379e-13
ARL16	35.4949	-1.10011	0.143678	-7.65683	1.90585e-14	1.85682e-13
NCBP2	83.4318	-0.809341	0.105722	-7.6554	1.92709e-14	1.87651e-13
UNC13C	39.9329	-2.19594	0.286927	-7.65329	1.95906e-14	1.90663e-13
BICDL2	3.33015	-2.47377	0.323303	-7.65154	1.9859e-14	1.93171e-13
TCEA2	38.1198	-1.19539	0.156299	-7.64809	2.0399e-14	1.98318e-13
GALNT7	8.89588	-2.44721	0.319993	-7.64769	2.04614e-14	1.98818e-13
DNAJB4	57.7399	-1.22492	0.160214	-7.64553	2.08094e-14	2.02091e-13
SERTAD1	1.97961	-4.06453	0.531767	-7.64345	2.11477e-14	2.05267e-13
TAPT1-AS1	185.16	0.954371	0.124872	7.64278	2.12589e-14	2.06236e-13
FBXO36	212.355	0.702423	0.0919138	7.64219	2.13561e-14	2.07068e-13
DNAI1	157.198	0.771207	0.100948	7.63964	2.17831e-14	2.11096e-13
TTC8	679.461	0.631645	0.082696	7.63816	2.20356e-14	2.1343e-13
AC009562.1	1.75007	-3.68795	0.482838	-7.63807	2.20499e-14	2.13454e-13
CDC42BPB	166.898	0.676168	0.088528	7.6379	2.20792e-14	2.13624e-13
CCNY	304.196	0.532214	0.0697181	7.6338	2.27938e-14	2.20303e-13
CEBPG	20.6097	-1.17941	0.154498	-7.63383	2.27874e-14	2.20303e-13
SMPD1	15.1213	-1.45929	0.191257	-7.63	2.34757e-14	2.26774e-13
FAM126A	7.61703	-2.19467	0.287647	-7.62972	2.35269e-14	2.27148e-13
MRPL32	25.0076	-1.4759	0.193526	-7.62634	2.41518e-14	2.33057e-13
LMLN	81.9395	0.742259	0.0973558	7.62418	2.45584e-14	2.36855e-13
NUDT4	96.6601	-0.754795	0.0990148	-7.62305	2.47742e-14	2.3881e-13
DAD1	62.9798	-1.57361	0.20644	-7.62259	2.48639e-14	2.39547e-13
TRAF3IP1	184.336	0.747485	0.0980645	7.62238	2.4904e-14	2.39806e-13
EHMT1	339.641	0.621652	0.0815722	7.62088	2.51957e-14	2.42487e-13
GTF2F1	34.8824	-1.15935	0.15217	-7.61877	2.56105e-14	2.46348e-13
UBR3	617.692	0.549289	0.0721	7.61844	2.56768e-14	2.46855e-13
RAPGEF4	1411.31	0.592168	0.0777603	7.6153	2.63089e-14	2.52799e-13
AC027031.2	85.6297	-1.39849	0.183678	-7.61383	2.66085e-14	2.55543e-13
DMAP1	40.3199	-0.991293	0.130202	-7.61349	2.66795e-14	2.5609e-13
MPC1	112.154	-0.842645	0.110719	-7.61068	2.72654e-14	2.61575e-13
NUDT16L1	36.8258	-1.28612	0.168997	-7.61033	2.73403e-14	2.62156e-13
LRRC7	39.3874	-1.74516	0.229392	-7.60779	2.78816e-14	2.67205e-13
UBN2	215.794	0.480437	0.0631572	7.60701	2.80515e-14	2.68691e-13
TRIP11	186.988	0.608995	0.0800842	7.60444	2.86148e-14	2.73942e-13
AIMP1	76.0231	-0.740227	0.0974161	-7.59861	2.99333e-14	2.86415e-13
PDP1	9.69791	-1.67421	0.220339	-7.59831	3.00015e-14	2.86916e-13
GCSH	58.0403	-1.39253	0.18333	-7.59576	3.06001e-14	2.92487e-13
APH1A	18.2023	-1.43187	0.188517	-7.59543	3.06766e-14	2.92913e-13
LRRC24	48.223	-1.5719	0.206953	-7.59543	3.06769e-14	2.92913e-13
CCDC7	206.03	0.7018	0.0924589	7.59039	3.18932e-14	3.04366e-13
CAMSAP1	783.926	0.515868	0.0679831	7.58819	3.24403e-14	3.09426e-13
SHARPIN	47.2205	-1.04592	0.13785	-7.58742	3.26341e-14	3.11111e-13
ARHGEF11	812.447	0.736333	0.0970491	7.58722	3.26838e-14	3.11421e-13
USPL1	92.486	-0.993389	0.130949	-7.58605	3.29814e-14	3.14092e-13
PCSK5	10.6811	-2.6826	0.353701	-7.58437	3.34115e-14	3.18021e-13
MLST8	36.4209	-1.12044	0.147763	-7.58267	3.38512e-14	3.22038e-13
GPR37	18.0109	-3.11025	0.41025	-7.58135	3.41983e-14	3.2517e-13
FRMPD4	9.54608	-3.29216	0.434271	-7.58089	3.43202e-14	3.26159e-13
AKTIP	55.5177	-0.790767	0.104313	-7.58069	3.43717e-14	3.26477e-13
RIMS2	7796.32	0.428843	0.0565821	7.57913	3.4787e-14	3.30249e-13
SIX6	100.035	-1.16838	0.154173	-7.57834	3.5e-14	3.32098e-13
SH3RF3	2.94904	-3.89656	0.514226	-7.57753	3.52203e-14	3.34014e-13
ITGB5-AS1	10.4355	-1.89647	0.250311	-7.57644	3.55175e-14	3.36657e-13
RFX3	539.14	0.769583	0.101586	7.57571	3.5717e-14	3.38371e-13
APLF	51.8225	1.10608	0.14602	7.57486	3.5952e-14	3.4042e-13
SLC22A15	198.004	0.857432	0.113258	7.5706	3.71494e-14	3.51575e-13
KMT2C	867.751	0.529384	0.0699435	7.56874	3.76867e-14	3.56475e-13
ZSCAN16-AS1	83.9892	-0.88264	0.116647	-7.56678	3.82598e-14	3.61708e-13
TSTA3	13.67	-1.55458	0.205467	-7.56606	3.84721e-14	3.63525e-13
ARL5A	118.843	-1.03922	0.137367	-7.5653	3.86963e-14	3.65454e-13
NUMA1	117.023	0.740024	0.0978648	7.5617	3.97847e-14	3.75538e-13
MIPEP	211.657	0.813237	0.107559	7.56083	4.00519e-14	3.77864e-13
FHL1	9.41978	-2.43927	0.322776	-7.55715	4.1201e-14	3.88503e-13
PELI1	15.2365	-1.58711	0.210081	-7.55474	4.19698e-14	3.95547e-13
AC004039.1	125.041	1.35895	0.180018	7.54897	4.38717e-14	4.13258e-13
GATB	41.96	-1.04066	0.137884	-7.54741	4.43992e-14	4.1801e-13
TTN-AS1	175.022	0.763975	0.101234	7.54663	4.46665e-14	4.20309e-13
GULP1	8.30729	-3.60977	0.478438	-7.54492	4.52576e-14	4.25431e-13
UBE2V2	112.056	-0.831467	0.110202	-7.54492	4.52569e-14	4.25431e-13
APOLD1	9.17351	-2.54764	0.337677	-7.54462	4.53595e-14	4.26169e-13
FXYD3	11.414	-3.53636	0.468825	-7.54304	4.5914e-14	4.31155e-13
CDKL5	430.263	0.725468	0.0961801	7.54281	4.59944e-14	4.31687e-13
IRF1	12.3	-1.64354	0.217899	-7.54266	4.60492e-14	4.31979e-13
CPNE1	80.2144	1.03035	0.136651	7.54002	4.69906e-14	4.40582e-13
PPP3CB	276.927	0.579554	0.0768711	7.5393	4.72504e-14	4.4279e-13
OSTM1	46.5317	-0.897324	0.119072	-7.53598	4.84666e-14	4.53953e-13
PIGP	58.5118	-1.54015	0.2044	-7.53497	4.88457e-14	4.57268e-13
COMT	86.4001	-0.733704	0.0973906	-7.53362	4.93524e-14	4.61774e-13
MPHOSPH9	350.423	0.586921	0.0779228	7.53208	4.99388e-14	4.6702e-13
SLC2A1	68.3023	-1.30685	0.173527	-7.53107	5.03277e-14	4.70415e-13
PET117	16.9933	-1.43519	0.190614	-7.52927	5.10239e-14	4.76678e-13
FAM122A	15.3469	-1.59961	0.212487	-7.52806	5.14992e-14	4.80871e-13
WDR45	40.1139	-1.02024	0.135557	-7.52628	5.22082e-14	4.87241e-13
BOD1L1	183.896	0.774913	0.103056	7.51933	5.50566e-14	5.1356e-13
BOD1	34.136	-1.38451	0.18415	-7.51836	5.54682e-14	5.17134e-13
PHAX	42.7087	-1.08123	0.14392	-7.51273	5.79063e-14	5.39588e-13
APOC1	13.6922	-4.10143	0.54594	-7.51261	5.79579e-14	5.39792e-13
LRRC37A	31.1506	2.41148	0.321063	7.51093	5.87105e-14	5.46522e-13
AC096536.3	3.27105	-3.93344	0.52372	-7.51057	5.8871e-14	5.47735e-13
MFGE8	233.714	-0.780116	0.103961	-7.5039	6.19453e-14	5.76044e-13
FRMD6-AS1	8.17039	-1.79529	0.239303	-7.50215	6.27805e-14	5.83512e-13
EIF4E	158.537	-0.561483	0.0748573	-7.50072	6.34704e-14	5.89623e-13
HECW1	7.68102	-3.11857	0.416003	-7.49651	6.5541e-14	6.08547e-13
AKIRIN2	50.5907	-1.03335	0.13789	-7.49404	6.67876e-14	6.19805e-13
DIRAS2	38.8149	-1.18773	0.158503	-7.49344	6.70916e-14	6.22309e-13
SPECC1	575.516	0.684951	0.0914158	7.4927	6.7472e-14	6.25518e-13
ZMAT2	27.6337	-1.66888	0.222749	-7.49222	6.77161e-14	6.27461e-13
LINC01748	2.09933	-4.11575	0.549465	-7.49046	6.86306e-14	6.35611e-13
ABCA4	2244.11	0.55434	0.0740073	7.49034	6.86959e-14	6.35892e-13
TTC23L	248.234	1.25513	0.167589	7.48932	6.92334e-14	6.40541e-13
ANKS1A	786.844	0.537842	0.0718155	7.48922	6.92833e-14	6.40677e-13
FLT1	10.3769	-2.84806	0.380393	-7.48717	7.03764e-14	6.50454e-13
CLEC16A	621.458	0.71939	0.096172	7.48025	7.41835e-14	6.85292e-13
GGPS1	28.0031	-1.87923	0.251327	-7.47725	7.58913e-14	7.00713e-13
KLHDC9	20.8076	-1.30138	0.174055	-7.47685	7.61266e-14	7.02529e-13
ASF1A	20.656	-1.23003	0.164539	-7.47561	7.68466e-14	7.08813e-13
GRHPR	29.5312	-1.03404	0.138348	-7.47422	7.76606e-14	7.15958e-13
ETV3	14.4472	-1.21309	0.162323	-7.47332	7.81993e-14	7.2056e-13
PTTG1	2.14715	-3.48805	0.466791	-7.47241	7.87363e-14	7.2514e-13
PRKACB	1031.72	0.529224	0.0708471	7.46995	8.02277e-14	7.38501e-13
CRYAB	48.1008	-3.10934	0.416316	-7.4687	8.099e-14	7.45141e-13
CFAP52	82.0346	1.29591	0.173556	7.46681	8.21592e-14	7.55515e-13
ZEB2	15.5751	-2.69681	0.361179	-7.46669	8.22373e-14	7.55852e-13
PRMT5	17.2185	-1.26112	0.168977	-7.46327	8.43983e-14	7.75322e-13
PIH1D1	49.4838	-0.993315	0.133117	-7.46196	8.52421e-14	7.82677e-13
OPTN	33.405	-1.72752	0.231667	-7.45689	8.85864e-14	8.12973e-13
TAF9	45.0231	-1.28948	0.172936	-7.45638	8.89289e-14	8.15705e-13
EBP	26.9136	-1.28448	0.172328	-7.45368	9.07695e-14	8.32168e-13
HVCN1	33.1797	2.17787	0.292198	7.45342	9.09528e-14	8.33429e-13
MYCBP2	393.087	0.48668	0.0652986	7.45314	9.11443e-14	8.34762e-13
BEX4	95.4795	-1.23225	0.165354	-7.45222	9.17829e-14	8.40188e-13
LGALS3BP	10.5646	-1.72085	0.230965	-7.45068	9.28592e-14	8.49613e-13
DNAJB2	83.0598	-0.9549	0.128198	-7.44863	9.43178e-14	8.62524e-13
ZNF382	58.064	0.93131	0.125044	7.44783	9.48894e-14	8.67315e-13
FARSA	39.9405	-0.990233	0.133	-7.44536	9.66787e-14	8.83226e-13
AC004982.2	53.6597	1.32909	0.178532	7.44457	9.72627e-14	8.88114e-13
PGAM1	351.91	-1.54359	0.207457	-7.44051	1.00295e-13	9.15343e-13
CFAP46	151.445	0.909917	0.122387	7.43473	1.04783e-13	9.55821e-13
LRRC4C	49.768	-3.78276	0.508821	-7.43435	1.0508e-13	9.5805e-13
FAM171B	124.648	-0.638036	0.0858264	-7.43403	1.05337e-13	9.59909e-13
FDPS	112.435	-0.943089	0.126875	-7.43322	1.05989e-13	9.6537e-13
DEGS1	22.5113	-1.16005	0.156084	-7.43222	1.06791e-13	9.7219e-13
NSD2	357.89	0.545795	0.0734405	7.4318	1.07131e-13	9.74798e-13
CA2	288.796	-1.42359	0.191581	-7.43075	1.07982e-13	9.82052e-13
[truncated: 16,181 more rows]

## Sheet: BC
symbol	baseMean	log2FoldChange	lfcSE	stat	pvalue	padj
C1orf43	653.383	-2.16725	0.0544527	-39.8006	0	0
HDAC2	359.071	-1.31161	0.0398379	-32.9237	1.00536e-237	9.13869e-234
MKRN1	361.389	-1.50456	0.0487276	-30.877	2.43184e-209	1.10527e-205
LAGE3	314.946	-3.1253	0.101193	-30.8844	1.93354e-209	1.10527e-205
TRAPPC3	213.022	-1.85819	0.0603854	-30.7721	6.18462e-208	2.24873e-204
ZNF385A	1156.26	-2.2061	0.0718886	-30.6877	8.29989e-207	2.51487e-203
VPS72	127.673	-1.7403	0.057281	-30.3817	9.57162e-203	2.48589e-199
COPS8	471.711	-1.78828	0.0596984	-29.9552	3.76849e-197	8.5639e-194
TMEM230	636.796	-1.55383	0.052629	-29.5242	1.40941e-191	2.84702e-188
EIF3L	342.792	-2.10338	0.0719912	-29.2172	1.17418e-187	2.13466e-184
NSFL1C	338.239	-1.4982	0.0516598	-29.0013	6.33526e-185	1.04705e-181
CDIP1	437.342	-1.53869	0.0531595	-28.9448	3.26598e-184	4.94797e-181
CLTB	1408.78	-2.30755	0.0812583	-28.3977	2.16146e-177	3.02271e-174
CPLX3	2185.44	-2.72803	0.0963424	-28.316	2.19498e-176	2.85034e-173
EMC4	232.221	-2.52351	0.0892314	-28.2805	5.99697e-176	7.26833e-173
POLDIP2	159.771	-1.65139	0.0586184	-28.1718	1.29521e-174	1.47168e-171
AL691432.2	85.2702	-2.52419	0.0902326	-27.9742	3.34362e-172	3.5757e-169
GNG13	2818.94	-3.5365	0.126473	-27.9626	4.63154e-172	4.67785e-169
TBRG1	281.419	-1.38159	0.0495475	-27.8843	4.14103e-171	3.96231e-168
RD3L	580.85	-2.18667	0.078896	-27.7159	4.49164e-169	4.0829e-166
SMARCB1	425.464	-1.60443	0.0579005	-27.7102	5.26804e-169	4.56062e-166
YWHAQ	1078.75	-1.96603	0.0712204	-27.6049	9.71501e-168	8.02813e-165
PAIP2	1045.05	-2.11422	0.0768546	-27.5094	1.35606e-166	1.07187e-163
UBE2I	296.287	-1.24404	0.0454121	-27.3945	3.1921e-165	2.41802e-162
RAB3A	736.011	-3.37156	0.123128	-27.3826	4.41788e-165	3.21268e-162
ELOC	444.88	-2.30053	0.0842191	-27.316	2.74085e-164	1.91649e-161
EIF4E	743.189	-1.37038	0.0503476	-27.2184	3.93072e-163	2.64668e-160
CITED2	267.224	-3.55479	0.131334	-27.0669	2.41601e-161	1.56868e-158
UBE2V2	518.009	-1.41368	0.0523718	-26.9931	1.77915e-160	1.11535e-157
CNBP	933.986	-2.02759	0.0753672	-26.9029	2.03385e-159	1.23251e-156
STAU1	376.484	-0.869648	0.0324173	-26.8267	1.57777e-158	9.25288e-156
NGDN	196.322	-1.28166	0.0477918	-26.8176	2.01669e-158	1.14573e-155
VAMP2	5606.63	-2.9693	0.110833	-26.7907	4.14485e-158	2.28344e-155
POLR3GL	216.78	-1.72773	0.0645587	-26.7622	8.90032e-158	4.75905e-155
RAB5C	252.375	-1.80875	0.0676977	-26.7181	2.9009e-157	1.50681e-154
ENOPH1	279.214	-1.63676	0.0612871	-26.7064	3.96239e-157	2.00101e-154
YWHAE	1452.38	-1.82849	0.0685703	-26.6659	1.17022e-156	5.74989e-154
RFC2	96.5804	-1.28528	0.0482391	-26.644	2.10084e-156	1.00509e-153
MLF2	502.59	-1.89066	0.0711648	-26.5673	1.62211e-155	7.56152e-153
SUMO1	790.093	-1.98222	0.0746483	-26.5542	2.298e-155	1.04444e-152
SRP68	158.727	-1.23849	0.0466602	-26.5428	3.11039e-155	1.37919e-152
STX3	2038.61	-1.13432	0.0428052	-26.4995	9.82258e-155	4.25177e-152
RUVBL2	139.34	-1.99417	0.0753973	-26.4488	3.76537e-154	1.59196e-151
GPKOW	75.9262	-1.79808	0.068062	-26.4183	8.43901e-154	3.48685e-151
RNF113A	88.7279	-2.53636	0.0962034	-26.3646	3.49163e-153	1.41062e-150
NECAP1	388.961	-1.35577	0.0516081	-26.2705	4.16359e-152	1.64552e-149
MRPS21	465.914	-1.81821	0.0693127	-26.2319	1.14923e-151	4.44534e-149
USP11	888.608	-1.42706	0.0544625	-26.2027	2.47726e-151	9.38263e-149
POLR2C	374.722	-1.92069	0.0734059	-26.1654	6.58631e-151	2.44366e-148
AP2M1	850.692	-2.33385	0.0893159	-26.1303	1.65236e-150	6.00799e-148
CDO1	247.752	-2.07732	0.079715	-26.0594	1.05276e-149	3.75277e-147
DCAF11	182.181	-1.40047	0.0538889	-25.9881	6.75842e-149	2.36285e-146
ZNF580	165.679	-1.99571	0.0768831	-25.9578	1.48617e-148	5.09786e-146
CSNK2B	316.403	-2.44623	0.0948793	-25.7826	1.39115e-146	4.68354e-144
CLPP	181.194	-1.77212	0.0688829	-25.7266	5.89812e-146	1.9496e-143
ETV2	40.4106	-3.26771	0.127302	-25.6689	2.59892e-145	8.43721e-143
RAB11B	390.655	-2.12724	0.0829493	-25.6451	4.79458e-145	1.52922e-142
TCEAL1	124.502	-2.29495	0.0895058	-25.6402	5.43329e-145	1.70306e-142
APMAP	254.498	-1.75419	0.0685027	-25.6076	1.25565e-144	3.86911e-142
NDUFB9	730.411	-2.75578	0.108157	-25.4794	3.3342e-143	1.01026e-140
ANP32A	697.978	-1.24861	0.0490844	-25.4381	9.55787e-143	2.84856e-140
TIMM17B	276.399	-2.4497	0.0964764	-25.3917	3.11668e-142	9.13891e-140
TMEM11	158.877	-1.78783	0.0706568	-25.303	2.96109e-141	8.54486e-139
BAD	271.442	-2.44246	0.0965602	-25.2947	3.65592e-141	1.03851e-138
H3F3B	6978.17	-2.37552	0.093918	-25.2935	3.7655e-141	1.05318e-138
NELFCD	346.636	-0.999481	0.0396031	-25.2374	1.55617e-140	4.28654e-138
ERGIC3	188.382	-1.90825	0.0756415	-25.2276	1.99431e-140	5.41143e-138
LSM2	220.009	-2.0564	0.0817993	-25.1396	1.83642e-139	4.90971e-137
TRAPPC8	457.085	1.14563	0.0457449	25.0439	2.03282e-138	5.35604e-136
TRIR	581.685	-2.44034	0.0975376	-25.0195	3.75476e-138	9.75166e-136
RBM42	140.331	-2.20562	0.0884394	-24.9394	2.78276e-137	7.12543e-135
IDH3B	258.79	-2.09459	0.0841869	-24.8802	1.21894e-136	3.07781e-134
TBCB	376.968	-2.44571	0.0983104	-24.8775	1.30418e-136	3.24794e-134
ARPC2	557.913	-1.34123	0.0539412	-24.8647	1.79466e-136	4.40905e-134
HIST2H2BE	462.398	-3.39431	0.137038	-24.7692	1.92762e-135	4.67255e-133
BABAM1	242.218	-1.36381	0.0551688	-24.7206	6.41789e-135	1.53523e-132
CNRIP1	570.965	-1.34336	0.0543488	-24.7173	6.96616e-135	1.64474e-132
UQCR11	1021.83	-3.2353	0.131048	-24.688	1.43854e-134	3.35292e-132
RNF11	414.657	-1.33238	0.0540469	-24.6522	3.4846e-134	8.01898e-132
CCNI	3058.52	-2.20955	0.0897142	-24.6287	6.21926e-134	1.41333e-131
UBL7	59.8411	-2.12348	0.0862931	-24.6078	1.04292e-133	2.34077e-131
NUDC	629.319	-2.1698	0.0884241	-24.5386	5.7301e-133	1.27041e-130
PHF5A	120.058	-2.29819	0.0936753	-24.5336	6.47062e-133	1.4173e-130
ACAT1	381.284	-0.946928	0.038661	-24.4931	1.74896e-132	3.78525e-130
ZNF428	581.284	-1.9497	0.079639	-24.4818	2.31085e-132	4.94249e-130
THYN1	156.246	-1.70247	0.0695958	-24.4622	3.729e-132	7.88292e-130
TARBP1	480.304	1.10307	0.0452423	24.3814	2.6908e-131	5.62284e-129
CCNG1	168.786	-2.1263	0.0875554	-24.2852	2.81125e-130	5.80779e-128
PFN1	279.162	-3.18734	0.131393	-24.2581	5.4338e-130	1.10996e-127
C12orf57	504.126	-2.54738	0.105051	-24.2489	6.7931e-130	1.37221e-127
RAB7A	782.848	-1.06915	0.0441759	-24.2021	2.11283e-129	4.22102e-127
STRAP	701.605	-1.61691	0.0670585	-24.1119	1.87639e-128	3.70791e-126
AC004816.1	67.4809	-1.58867	0.0658981	-24.108	2.05969e-128	4.0259e-126
POLR2E	287.677	-1.51342	0.0627779	-24.1076	2.0816e-128	4.0259e-126
NDUFS8	481.653	-2.14694	0.0890609	-24.1064	2.13929e-128	4.09392e-126
PCNP	712.594	-1.85063	0.0768158	-24.0918	3.04815e-128	5.77244e-126
PPP1CA	133.228	-2.0285	0.0844435	-24.0219	1.64051e-127	3.07469e-125
C9orf78	188.382	-2.28133	0.0950818	-23.9934	3.25902e-127	6.04581e-125
SUB1	939.054	-1.57519	0.0656574	-23.991	3.45334e-127	6.34159e-125
ALKBH5	446.2	-1.70235	0.0709767	-23.9847	4.01694e-127	7.3028e-125
DGUOK	348.918	-1.30222	0.0543168	-23.9746	5.12293e-127	9.22128e-125
SNRPD2	385.653	-3.07903	0.128581	-23.9462	1.01177e-126	1.80333e-124
ARL2BP	225.696	-1.80196	0.0752946	-23.9321	1.41856e-126	2.50382e-124
FAM122A	104.054	-2.2881	0.0956459	-23.9227	1.77973e-126	3.1111e-124
SARAF	1730.68	-1.92116	0.0803104	-23.9216	1.82466e-126	3.15926e-124
PA2G4	334.264	-2.02426	0.0847798	-23.8766	5.36039e-126	9.19358e-124
APBB1	426.477	-1.20134	0.050397	-23.8375	1.36483e-125	2.31894e-123
GGCT	188.654	-1.81629	0.0762547	-23.8187	2.13592e-125	3.56588e-123
TSEN34	134.508	-1.9316	0.0810959	-23.8187	2.13796e-125	3.56588e-123
PEF1	162.678	-1.87702	0.0788179	-23.8147	2.3541e-125	3.89068e-123
EAPP	558.431	-1.23704	0.0519718	-23.8021	3.1773e-125	5.20389e-123
RANGRF	169.483	-2.00087	0.0840759	-23.7984	3.46963e-125	5.63196e-123
BEX3	1347.17	-2.05254	0.0862615	-23.7944	3.81807e-125	6.1427e-123
EIF3H	640.466	-1.56681	0.0659197	-23.7685	7.07525e-125	1.12832e-122
EI24	198.994	-1.66738	0.070202	-23.7512	1.06701e-124	1.6868e-122
RPF1	152.255	-1.83128	0.0772598	-23.7029	3.36821e-124	5.2788e-122
MIEN1	132.14	-2.7581	0.116363	-23.7025	3.39871e-124	5.28107e-122
NOSIP	193.31	-1.5503	0.0654299	-23.6941	4.14757e-124	6.39007e-122
UBE2L6	80.9198	-2.25933	0.0954231	-23.677	6.22957e-124	9.51711e-122
ANP32B	392.688	-1.28625	0.0543469	-23.6673	7.82805e-124	1.18595e-121
PIGH	231.179	-1.52623	0.0645044	-23.6609	9.12597e-124	1.37116e-121
YTHDC2	1039.25	0.923175	0.0391621	23.5732	7.26074e-123	1.08197e-120
RAD23A	400.395	-1.77898	0.0755105	-23.5594	1.00485e-122	1.48522e-120
SNRPA	79.7452	-1.62078	0.0687979	-23.5585	1.02688e-122	1.50554e-120
STRN3	918.565	0.959777	0.0407822	23.5342	1.82139e-122	2.64903e-120
EIF1	3766.31	-2.62128	0.111391	-23.5321	1.91295e-122	2.76011e-120
FKBP8	467.154	-2.04107	0.0867678	-23.5234	2.34913e-122	3.36277e-120
PPIG	1501.35	-0.852651	0.036269	-23.5091	3.29168e-122	4.67521e-120
RPP21	222.995	-2.10445	0.0895321	-23.505	3.62392e-122	5.1072e-120
ZMAT5	69.9377	-1.69621	0.0721748	-23.5014	3.94861e-122	5.49895e-120
EIF3D	270.085	-1.37211	0.0583846	-23.5012	3.96239e-122	5.49895e-120
SRSF8	266.728	-1.79456	0.076542	-23.4454	1.47271e-121	2.02832e-119
GGNBP2	488.287	-0.938557	0.0400585	-23.4296	2.13246e-121	2.91489e-119
SNRPB2	229.954	-1.8736	0.0799959	-23.4212	2.59766e-121	3.52429e-119
CHTOP	236.14	-1.49787	0.0640028	-23.4032	3.96034e-121	5.29404e-119
XRCC6	601.363	-1.4773	0.0631236	-23.4033	3.95448e-121	5.29404e-119
ZNF667-AS1	279.066	-1.82703	0.07809	-23.3965	4.63717e-121	6.15356e-119
AL031710.1	35.7546	-2.87908	0.123139	-23.3807	6.71226e-121	8.84268e-119
APLP1	800.711	-1.78952	0.0765475	-23.3779	7.17594e-121	9.38551e-119
ANAPC13	221.219	-2.79245	0.119838	-23.3019	4.24392e-120	5.51103e-118
ARFIP2	129.117	-1.76814	0.0759064	-23.2936	5.14541e-120	6.6343e-118
CNOT1	405.817	1.03232	0.0443203	23.2923	5.3094e-120	6.79753e-118
VPS4A	327.693	-1.17679	0.050537	-23.2857	6.18404e-120	7.86195e-118
NENF	351.024	-2.3185	0.0996218	-23.273	8.31882e-120	1.05025e-117
ATP6V1G2	597.732	-3.11184	0.133837	-23.2509	1.39205e-119	1.74535e-117
KIAA0586	583.544	1.02241	0.0440807	23.194	5.23585e-119	6.51971e-117
ABHD8	328.689	-1.0365	0.0447196	-23.1777	7.64846e-119	9.45912e-117
TBPL1	325.358	-1.25866	0.0543678	-23.1509	1.42418e-118	1.73918e-116
STX5	229.671	-1.00962	0.0436106	-23.1508	1.4254e-118	1.73918e-116
PSMD4	337.054	-1.64918	0.0712484	-23.147	1.55982e-118	1.8905e-116
ZNF791	328.015	-0.764908	0.0330626	-23.1352	2.05048e-118	2.46872e-116
GADD45G	367.224	-2.78731	0.120537	-23.124	2.65391e-118	3.17422e-116
ARPC1A	307.839	-1.15682	0.050033	-23.1211	2.83802e-118	3.37224e-116
TSR2	329.63	-2.4892	0.107669	-23.119	2.98552e-118	3.52447e-116
PPP2CA	454.838	-1.14997	0.0498041	-23.0898	5.86228e-118	6.87589e-116
GDI1	492.702	-1.68727	0.0730938	-23.0836	6.76348e-118	7.88205e-116
TBCA	1309.37	-1.65171	0.0715544	-23.0833	6.81231e-118	7.88839e-116
PCIF1	83.7281	-1.6704	0.0723967	-23.0729	8.6643e-118	9.96943e-116
EBAG9	256.861	-1.27747	0.0553712	-23.071	9.05918e-118	1.03582e-115
OXA1L	137.688	-1.94196	0.0842556	-23.0484	1.52557e-117	1.73343e-115
MAFB	100.489	-5.98494	0.259734	-23.0426	1.74552e-117	1.97102e-115
RSL1D1	210.161	-1.97901	0.0859042	-23.0374	1.96852e-117	2.20912e-115
TADA3	206.456	-1.17706	0.0510995	-23.0347	2.09521e-117	2.33687e-115
RPE	264.551	1.5646	0.0679546	23.0241	2.6724e-117	2.96246e-115
PRAF2	122.65	-2.5979	0.112876	-23.0155	3.25942e-117	3.59129e-115
OGT	395.779	1.05302	0.0457795	23.002	4.44939e-117	4.87289e-115
TCEAL5	245.972	-2.80905	0.122175	-22.9921	5.5954e-117	6.09128e-115
IER3IP1	371.872	-1.95697	0.0851795	-22.9746	8.35875e-117	9.04536e-115
AMZ2	131.64	-1.95189	0.0850612	-22.9469	1.58265e-116	1.70252e-114
NABP2	109.075	-2.03308	0.0886837	-22.9251	2.61025e-116	2.79143e-114
RABIF	63.457	-2.02545	0.0883674	-22.9208	2.88097e-116	3.05067e-114
ZFPL1	125.461	-1.88495	0.0822376	-22.9207	2.88622e-116	3.05067e-114
MRPS18C	229.947	-1.66017	0.0724482	-22.9153	3.27375e-116	3.44028e-114
MANBAL	127.879	-1.95307	0.085241	-22.9123	3.49996e-116	3.65685e-114
MMADHC	242.878	-1.46552	0.063992	-22.9016	4.47797e-116	4.65197e-114
PMVK	279.482	-2.2041	0.0962564	-22.8982	4.84415e-116	5.00379e-114
HNRNPA0	417.685	-2.20515	0.0963042	-22.8978	4.88809e-116	5.02065e-114
BCAS2	418.982	-2.05113	0.0895959	-22.8931	5.44176e-116	5.55793e-114
NAA10	163.322	-1.74927	0.0764317	-22.8867	6.30424e-116	6.40285e-114
SNU13	726.93	-2.51302	0.109859	-22.8749	8.25366e-116	8.33619e-114
UXT	188.769	-2.12684	0.0930449	-22.8582	1.21225e-115	1.2176e-113
MEA1	149.283	-2.91094	0.127432	-22.8431	1.71297e-115	1.71109e-113
MRPL24	106.092	-2.14988	0.0941313	-22.8392	1.87116e-115	1.85889e-113
POLR2L	462.475	-3.19742	0.140005	-22.8379	1.92693e-115	1.90389e-113
DUSP26	380.312	-2.0532	0.0899378	-22.8291	2.35604e-115	2.31529e-113
AKR1B1	225.526	-2.05454	0.090022	-22.8226	2.73431e-115	2.67257e-113
ZNF669	53.0948	-2.0274	0.0889419	-22.7947	5.17665e-115	5.0327e-113
MOCS2	355.168	-1.95134	0.0856421	-22.7848	6.48155e-115	6.2678e-113
PDZD11	164.743	-2.69914	0.118479	-22.7816	6.97828e-115	6.71244e-113
IMP3	132.363	-2.45932	0.10798	-22.7757	7.97974e-115	7.63536e-113
NAPA	603.908	-1.55537	0.0683053	-22.7708	8.93272e-115	8.50245e-113
AC093297.1	78.6946	4.37082	0.192157	22.7461	1.5694e-114	1.48602e-112
NEIL2	158.603	-1.83025	0.0806048	-22.7065	3.86728e-114	3.64286e-112
NDUFS7	460.513	-1.96061	0.0863626	-22.702	4.27857e-114	4.00951e-112
PHKB	561.585	1.06132	0.0467678	22.6934	5.20126e-114	4.84918e-112
SSU72	488.661	-1.90141	0.0837923	-22.692	5.37917e-114	4.98945e-112
SDHB	388.315	-1.22673	0.0540677	-22.6888	5.78237e-114	5.33622e-112
FARSA	158.517	-1.53169	0.0676522	-22.6407	1.72286e-113	1.5819e-111
AC004253.1	107.478	2.81305	0.124397	22.6135	3.19318e-113	2.91719e-111
DDX41	90.854	-1.8816	0.0832218	-22.6095	3.4966e-113	3.17841e-111
MRPL9	118.691	-2.01575	0.0892585	-22.5832	6.33459e-113	5.72949e-111
EIF3E	720.671	-1.92609	0.085339	-22.5698	8.57874e-113	7.72087e-111
RPL31	1310.82	-3.55431	0.157558	-22.5588	1.10184e-112	9.86773e-111
GOLGA7	194.713	-2.00836	0.0890341	-22.5572	1.14246e-112	1.01814e-110
HSPB6	98.4801	-3.08061	0.136576	-22.556	1.172e-112	1.03937e-110
TAF12	162.344	-1.11888	0.0496649	-22.5286	2.17797e-112	1.92211e-110
PYURF	201.33	-2.49803	0.110941	-22.5168	2.84145e-112	2.49553e-110
NSMCE1	161.965	-1.37103	0.0609244	-22.5038	3.80839e-112	3.32868e-110
CYC1	518.117	-2.3332	0.103716	-22.4961	4.53006e-112	3.9405e-110
CDC37L1	260.925	-0.877659	0.0390518	-22.4742	7.41681e-112	6.42084e-110
UNC119	2409.68	-1.84324	0.0820224	-22.4724	7.72226e-112	6.65358e-110
FBL	123.196	-1.9841	0.0882919	-22.4721	7.78929e-112	6.67968e-110
CAPZA2	1017.25	-1.17997	0.052565	-22.4478	1.34567e-111	1.14856e-109
SQSTM1	621.101	-1.38642	0.0617745	-22.4433	1.48835e-111	1.2644e-109
JTB	317.363	-2.17552	0.0970232	-22.4227	2.36401e-111	1.99896e-109
LIN37	126.342	-1.66841	0.0744549	-22.4083	3.26567e-111	2.7486e-109
CIRBP	3094.76	-2.25469	0.100665	-22.398	4.11892e-111	3.45079e-109
PPP4C	189.041	-1.87104	0.0835782	-22.3867	5.30833e-111	4.42685e-109
VBP1	384.564	-2.4882	0.111152	-22.3855	5.4476e-111	4.52226e-109
SARS	516.024	-1.5376	0.0687125	-22.3774	6.5416e-111	5.40574e-109
CCT4	566.314	-1.90107	0.0849799	-22.3708	7.58003e-111	6.23552e-109
GLO1	447.163	-1.85051	0.0828236	-22.3428	1.42001e-110	1.16287e-108
GORASP2	296.509	-0.9387	0.0420531	-22.3218	2.26956e-110	1.85025e-108
AVPI1	90.8602	-2.20508	0.0988427	-22.309	3.02296e-110	2.45346e-108
LARP6	196.064	-2.02976	0.0909924	-22.3069	3.16557e-110	2.55778e-108
AAMP	274.708	-1.82453	0.081851	-22.2909	4.52991e-110	3.64397e-108
PRMT5	61.9	-1.6282	0.0730508	-22.2885	4.77238e-110	3.82211e-108
RACK1	1095.27	-2.36352	0.106092	-22.2781	6.02864e-110	4.80705e-108
TEX30	79.5637	-2.16554	0.0972125	-22.2763	6.26874e-110	4.97667e-108
EXOSC7	238.138	-0.872355	0.0391708	-22.2706	7.13172e-110	5.63716e-108
PRRT1	215.504	-1.59017	0.071457	-22.2535	1.04402e-109	8.21655e-108
ADRM1	185.955	-2.49416	0.11214	-22.2414	1.36541e-109	1.06996e-107
HSF1	400.116	-1.13783	0.0511998	-22.2234	2.03988e-109	1.59163e-107
PSMB5	309.445	-2.14943	0.0968083	-22.203	3.21456e-109	2.49746e-107
TPGS2	200.791	-1.54274	0.0695258	-22.1894	4.34833e-109	3.36394e-107
GOT1	582.675	-1.57328	0.0709108	-22.1868	4.60599e-109	3.54818e-107
GPATCH3	44.3842	-1.66941	0.0752558	-22.1832	4.9924e-109	3.82962e-107
BRK1	286.13	-2.24117	0.101051	-22.1787	5.51818e-109	4.19751e-107
PSMF1	366.611	-0.847382	0.0382069	-22.1788	5.50835e-109	4.19751e-107
CDKN2AIPNL	176.013	-1.70929	0.0770872	-22.1734	6.19813e-109	4.69508e-107
KCNA5	405.704	-2.19718	0.0991912	-22.151	1.02099e-108	7.7019e-107
SNRPD1	378.175	-1.96522	0.0887352	-22.1471	1.1135e-108	8.36508e-107
TPM3	666.767	-1.06591	0.0481964	-22.116	2.21524e-108	1.65733e-106
NT5C3B	172.138	-1.57877	0.071389	-22.1151	2.26175e-108	1.68519e-106
LSM5	356.968	-1.36872	0.061917	-22.1057	2.78554e-108	2.06698e-106
BEX2	1023.32	-1.82073	0.0824172	-22.0916	3.80448e-108	2.81161e-106
SNX3	491.116	-2.20687	0.100018	-22.0648	6.89017e-108	5.07139e-106
KANSL3	241.679	1.11306	0.0504972	22.0421	1.13722e-107	8.33656e-106
RPA2	202.681	-1.57209	0.0713687	-22.0277	1.56211e-107	1.14052e-105
EID1	1447.58	-2.61441	0.118847	-21.9981	3.00343e-107	2.1841e-105
PPP1R2	349.529	-1.11646	0.0508003	-21.9774	4.74212e-107	3.43473e-105
U47924.2	23.4567	-2.52747	0.115135	-21.9523	8.23187e-107	5.93871e-105
RNPS1	511.658	-0.997268	0.0454622	-21.9362	1.1728e-106	8.42748e-105
TXN2	410.87	-1.8986	0.0865519	-21.936	1.17849e-106	8.43505e-105
RBM18	110.761	-1.6113	0.0734928	-21.9246	1.51202e-106	1.07798e-104
BTG1	2624.28	-1.70729	0.0779153	-21.9121	1.99059e-106	1.41363e-104
POLD2	233.887	-1.25764	0.0574143	-21.9047	2.34388e-106	1.65804e-104
TUBG2	190.624	-1.01629	0.0464288	-21.8892	3.29274e-106	2.32023e-104
METTL9	386.847	-1.44611	0.0660886	-21.8813	3.9117e-106	2.74574e-104
OS9	364.593	-1.16541	0.0533118	-21.8603	6.20672e-106	4.33993e-104
HEXIM2	56.5486	-2.00263	0.0916674	-21.8467	8.36412e-106	5.82604e-104
TMEM183A	143.397	-1.8909	0.0866345	-21.8261	1.3102e-105	9.09137e-104
COPS6	575.972	-1.44314	0.0661719	-21.809	1.90734e-105	1.31845e-103
PSMA7	727.683	-2.22287	0.10198	-21.7971	2.47005e-105	1.70097e-103
PSMD7	337.064	-1.38948	0.0637764	-21.7867	3.10345e-105	2.12908e-103
CDK2AP2	168.197	-2.40027	0.11025	-21.7711	4.3622e-105	2.98138e-103
[truncated: 17,914 more rows]

## Sheet: AC
symbol	baseMean	log2FoldChange	lfcSE	stat	pvalue	padj
[truncated: 18,180 more rows]

[truncated: 6 more sheets: RGC, HC, MG, RPE, Astrocyte, Microglia]
