# Supplementary material for: Integrated multi-omics single cell atlas of the human retina
Source: Research Square preprint supplement (doi:10.21203/rs.3.rs-3471275/v1), 2023-11-16
Supplement: Supplementary file 14 [file 87959f688c6e608063d66c24.xlsx]

## Sheet: Table S3
Table S3: Summary of donor information for the atlas
donor	gender	age	race	# cells
Chen_19_D011	Female	90	Caucasian	196119
Chen_19D015	Male	73	Hispanic	121307
Chen_19_D006	Male	90	Caucasian	114672
Chen_19_D019	Female	82	Caucasian	106866
Chen_D013_13	Male	69	Caucasian	102150
Chen_19_D008	Female	64	Hispanic	97243
Chen_D005_13	Male	80	Caucasian	82799
Chen_19_D009	Male	68	Hispanic	78114
Chen_19_D007	Male	66	Caucasian	72889
Roska_R-00646_01	Male	50-80	Unknown	67522
Chen_19_D005	Male	53	Hispanic	64643
Chen_19D013	Female	78	Caucasian	64302
Chen_19_D003	Male	86	Caucasian	61626
Chen_19D014	Male	84	Caucasian	55411
Chen_19_D010	Female	88	Caucasian	55320
Chen_D28_13	Male	67	Caucasian	49304
Chen_D30_13	Female	73	Caucasian	43914
Chen_D19_13	Male	82	Caucasian	43299
Chen_D21_13	Male	86	Caucasian	43150
Chen_mix_D017_13_D018_13	Male_Female	65_91	Caucasian	39794
Chen_D27_13	Male	77	Caucasian	35971
Hackney_109373	Male	70	Caucasian	35836
Roska_R-00646_07	Male	50-80	Unknown	34404
Roska_R-00646_04	Female	50-80	Unknown	32412
Sanes_H5	Male	69	Caucasian	32059
Chen_D009_13	Male	85	Asian	31585
Hackney_120974	Male	79	Caucasian	28064
Chen_D026_13	Male	81	Caucasian	27651
Sanes_H3	Male	60	Caucasian	27514
Chen_mix_D018_13_D026_13	Male_Female	91_81	Caucasian	24001
Chen_19D016	Male	83	Caucasian	22296
Chen_D001-12	Female	78	Caucasian	21298
Hackney_109829	Female	77	Caucasian	20707
Hackney_110814	Male	65	Caucasian	20410
Chen_19_D016	Male	83	Caucasian	15607
Roska_R-00646_03	Female	50-80	Unknown	15514
Sanes_H1	Male	74	Caucasian	11721
Sanes_H9	Female	53	Caucasian	9187
Chen_19_D017	Male	71	Caucasian	8670
Sanes_H2	Male	78	Caucasian	8101
Chen_17D013	Male	65	Caucasian	7942
Chen_D018_13	Female	91	Caucasian	6786
Chen_D017_13	Male	65	Caucasian	5150
Wong_Donor_2	Male	42	Caucasian	4681
Sanes_H4	Male	64	Caucasian	3807
Wong_Donor_3	Female	53	Caucasian	3709
Hafler_574	Male	71	Unknown	3118
Scheetz_Donor2	Male	54	Caucasian	2659
Hafler_607	Male	86	Unknown	2009
Scheetz_Donor3	Female	82	Caucasian	1753
Scheetz_Donor1	Male	89	Caucasian	1649
Sanes_H11	Male	65	Caucasian	1453
Wong_Donor_1	Female	80	Caucasian	1304
Hafler_555	Male	68	Unknown	1191
total				2070663
