# Supplementary material for: Integrated multi-omics single cell atlas of the human retina
Source: Research Square preprint supplement (doi:10.21203/rs.3.rs-3471275/v1), 2023-11-16
Supplement: Supplementary file 15 [file 933e5775b4dc456bc7864690.xlsx]

## Sheet: Table S10
Table S10. Summary of collected snATAC-seq data for the human retina
name	study_PI	Institute	access	n_donor	n_sample	n_cell	accession/note
Chen	Rui Chen	Baylor College of Medicine	private	23	49	354776	lobe, fovea, macular
Beier	David R. Beier	Seattle Children's Research Institute	public	3	3	18191	GSE183684
total				26	52	372967
