# Supplementary material for: Integrated multi-omics single cell atlas of the human retina
Source: Research Square preprint supplement (doi:10.21203/rs.3.rs-3471275/v1), 2023-11-16
Supplement: Supplementary file 16 [file b267fa78a3f77773ae2e2ad5.xlsx]

## Sheet: Ratnapriya retinal eQTL
Table S21. Fine-mapped eQTL variants
eGene	eQTL variant	Z score	functional PIP	uniform PIP	genomic annotation
A1BG-AS1_1	19:58860812:G:T:A1BG-AS1:rs12980208	-5.6657	0.00813776	0.0285689	anno;
A1BG-AS1_1	19:58856812:T:C:A1BG-AS1:rs1265955	-5.62255	0.00755182	0.0259727	anno;
A1BG-AS1_1	19:58859822:G:A:A1BG-AS1:rs1265960	-5.64864	0.18612	0.0236259	anno;Promoter|peak|
A1BG-AS1_1	19:58860387:A:T:A1BG-AS1:rs1265961	-5.64845	0.111472	0.0236044	anno;Exon|
A1BG-AS1_1	19:58847132:A:T:A1BG-AS1:rs73572630	-5.56468	0.00649736	0.0226929	anno;
A1BG-AS1_1	19:58854600:G:A:A1BG-AS1:rs1265954	-5.58802	0.00641201	0.0220086	anno;
A1BG-AS1_1	19:58858676:A:G:A1BG-AS1:rs1265957	-5.64704	0.193879	0.0218524	anno;Promoter|peak|
A1BG-AS1_1	19:58857131:T:C:A1BG-AS1:rs1265956	-5.62061	0.00615221	0.021328	anno;
A1BG-AS1_1	19:58851462:C:A:A1BG-AS1:rs61460516	-5.56621	0.00578634	0.0198345	anno;3_UTR|
A1BG-AS1_1	19:58851928:A:G:A1BG-AS1:rs112072625	-5.56616	0.00578505	0.01983	anno;3_UTR|
A1BG-AS1_1	19:58851238:C:T:A1BG-AS1:rs56688575	-5.56615	0.0057849	0.0198295	anno;3_UTR|
A1BG-AS1_1	19:58850341:C:G:A1BG-AS1:rs59054150	-5.56603	0.0167549	0.019818	anno;3_UTR|
A1BG-AS1_1	19:58853363:T:C:A1BG-AS1:rs1268538	-5.566	0.0997578	0.0198148	anno;3_UTR|
A1BG-AS1_1	19:58852541:C:T:A1BG-AS1:rs73572641	-5.56584	0.00577634	0.0197997	anno;3_UTR|
A1BG-AS1_1	19:58851686:A:G:A1BG-AS1:rs57201473	-5.56535	0.00576311	0.0197538	anno;3_UTR|
A1BG-AS1_1	19:58846866:T:G:A1BG-AS1:rs45535435	-5.5641	0.00572936	0.0196365	anno;Promoter|
A1BG-AS1_1	19:58845553:C:T:A1BG-AS1:rs73572627	-5.5593	0.00579037	0.0194999	anno;Promoter|
A1BG-AS1_1	19:58845441:A:G:A1BG-AS1:rs73572621	-5.55905	0.00578365	0.0194769	anno;Promoter|
A1BG-AS1_1	19:58845296:G:A:A1BG-AS1:rs61096651	-5.55864	0.00577241	0.0194386	anno;Promoter|
A1BG-AS1_1	19:58845187:A:C:A1BG-AS1:rs56654816	-5.55783	0.00575073	0.0193646	anno;Promoter|
A1BG-AS1_1	19:58844606:A:C:A1BG-AS1:rs61514202	-5.55544	0.00568664	0.0191459	anno;
A1BG-AS1_1	19:58840850:T:C:A1BG-AS1:rs16988659	-5.54955	0.00556607	0.0191236	anno;
A1BG-AS1_1	19:58864479:T:C:A1BG-AS1:rs893184	-5.69678	0.00586797	0.0188895	anno;Promoter|
A1BG-AS1_1	19:58843881:C:T:A1BG-AS1:rs60296671	-5.55127	0.00557659	0.0187704	anno;
A1BG-AS1_1	19:58843344:A:T:A1BG-AS1:rs112923015	-5.54798	0.00549151	0.0184801	anno;
A1BG-AS1_1	19:58843146:C:T:A1BG-AS1:rs113909979	-5.54669	0.00545846	0.0183674	anno;
A1BG-AS1_1	19:58843003:T:C:A1BG-AS1:rs139211863	-5.5457	0.00543323	0.0182813	anno;
A1BG-AS1_1	19:58842883:T:C:A1BG-AS1:rs61219003	-5.54516	0.00541952	0.0182346	anno;
A1BG-AS1_1	19:58842735:A:G:A1BG-AS1:rs60818748	-5.54438	0.00539972	0.018167	anno;
A1BG-AS1_1	19:58842745:G:T:A1BG-AS1:rs60245393	-5.5443	0.00539782	0.0181605	anno;
A1BG-AS1_1	19:58850756:C:G:A1BG-AS1:rs16988668	-5.5622	0.0153438	0.01815	anno;3_UTR|peak|
A1BG-AS1_1	19:58842534:A:G:A1BG-AS1:rs58617733	-5.54263	0.00535594	0.0180177	anno;
A1BG-AS1_1	19:58842450:T:C:A1BG-AS1:rs55827758	-5.542	0.00534024	0.0179641	anno;
A1BG-AS1_1	19:58841939:C:T:A1BG-AS1:rs60348321	-5.53781	0.00523676	0.0176112	anno;
A1BG-AS1_1	19:58841940:T:C:A1BG-AS1:rs59119314	-5.53781	0.00523676	0.0176112	anno;
A1BG-AS1_1	19:58841066:C:T:A1BG-AS1:rs56066701	-5.53185	0.00513271	0.0175972	anno;
A1BG-AS1_1	19:58841861:C:T:A1BG-AS1:rs59874238	-5.53719	0.00522166	0.0175597	anno;
A1BG-AS1_1	19:58840905:G:A:A1BG-AS1:rs16988665	-5.53023	0.00509416	0.017463	anno;
A1BG-AS1_1	19:58841605:G:A:A1BG-AS1:rs58807256	-5.53513	0.00517175	0.0173894	anno;
A1BG-AS1_1	19:58841515:T:G:A1BG-AS1:rs73570694	-5.53458	0.00515852	0.0173443	anno;
A1BG-AS1_1	19:58841364:G:C:A1BG-AS1:rs73570691	-5.53297	0.00511986	0.0172125	anno;
A1BG-AS1_1	19:58864150:T:C:A1BG-AS1:rs6510137	-5.68606	0.00521544	0.0168093	anno;Promoter|
A1BG-AS1_1	19:58842180:G:A:A1BG-AS1:rs16988667	-5.53923	0.00491332	0.0165277	anno;
A1BG-AS1_1	19:58865054:T:C:A1BG-AS1:rs893183	-5.67625	0.0049832	0.0160512	anno;Promoter|
A1BG-AS1_1	19:58865068:T:C:A1BG-AS1:rs893182	-5.67596	0.0049766	0.0160297	anno;Promoter|
A1BG-AS1_1	19:58865082:A:T:A1BG-AS1:rs893181	-5.67568	0.00496999	0.0160081	anno;Promoter|
A1BG-AS1_1	19:58863449:C:T:A1BG-AS1:rs4801579	-5.67626	0.134669	0.0156297	anno;Promoter|
A1BG-AS1_1	19:58864867:A:G:A1BG-AS1:rs2375470	-5.65685	0.00483155	0.0155257	anno;Promoter|
A1BG-AS1_1	19:58840490:T:C:A1BG-AS1:rs58509147	-5.52606	0.00442122	0.0152405	anno;
A1BG-AS1_1	19:58865091:A:G:A1BG-AS1:rs893180	-5.67601	0.00477946	0.0150075	anno;Promoter|
A1BG-AS1_1	19:58854566:C:T:A1BG-AS1:rs1265953	-5.44763	0.0035099	0.0119129	anno;
A2M-AS1_1	12:9263647:T:C:A2M-AS1:ss1388094903	9.93071	0.0479064	0.108596	anno;
A2M-AS1_1	12:9242924:C:G:A2M-AS1:ss1388094322	9.93641	0.112894	0.0879766	anno;DAR|peak|
A2M-AS1_1	12:9255831:T:G:A2M-AS1:ss1388094716	9.92819	0.0388061	0.0861254	anno;
A2M-AS1_1	12:9262289:T:G:A2M-AS1:ss1388094880	9.93296	0.0382293	0.0849574	anno;
A2M-AS1_1	12:9264946:G:T:A2M-AS1:ss1388094937	9.92987	0.0371442	0.0823535	anno;
A2M-AS1_1	12:9254783:G:C:A2M-AS1:ss1388094682	9.92918	0.0369075	0.0817857	anno;
A2M-AS1_2	12:9435639:C:T:A2M-AS1:ss1388099767	-5.11272	0.0533557	0.0688387	anno;Promoter|
A2M-AS1_2	12:9433426:A:T:A2M-AS1:ss1388099698	-5.1118	0.0516526	0.0660129	anno;
A2M-AS1_2	12:9434060:C:T:A2M-AS1:ss1388099718	-5.1118	0.0516526	0.0660129	anno;
A2M-AS1_2	12:9434538:A:G:A2M-AS1:ss1388099729	-5.1118	0.0516526	0.0660129	anno;
A2M-AS1_2	12:9431402:T:C:A2M-AS1:ss1388099635	-5.1118	0.0490384	0.0642048	anno;
A2M-AS1_2	12:9432850:G:A:A2M-AS1:ss1388099681	-5.1118	0.0426927	0.055331	anno;
A2M-AS1_2	12:9432988:T:G:A2M-AS1:ss1388099687	-5.1118	0.0426927	0.055331	anno;
A2M-AS1_2	12:9432789:C:G:A2M-AS1:ss1388099680	-5.1118	0.0401095	0.0537619	anno;
A2M-AS1_2	12:9435574:C:T:A2M-AS1:ss1388099762	-5.06433	0.0413673	0.0537166	anno;Promoter|
A2M-AS1_2	12:9435244:T:C:A2M-AS1:ss1388099751	-5.06402	0.0412861	0.0536176	anno;
A2M-AS1_2	12:9435768:G:A:A2M-AS1:ss1388099772	-5.06501	0.040542	0.0521658	anno;Promoter|
A2M-AS1_2	12:9436081:T:C:A2M-AS1:ss1388099790	-5.05446	0.114848	0.0520392	anno;Promoter|
A2M-AS1_2	12:9433483:C:T:A2M-AS1:ss1388099700	-5.06402	0.04029	0.0518625	anno;
A2M-AS1_2	12:9433605:G:A:A2M-AS1:ss1388099704	-5.06402	0.04029	0.0518625	anno;
A2M-AS1_2	12:9433983:T:C:A2M-AS1:ss1388099715	-5.06402	0.04029	0.0518625	anno;
A2M-AS1_2	12:9434423:A:G:A2M-AS1:ss1388099723	-5.06402	0.04029	0.0518625	anno;
A2M-AS1_2	12:9434852:G:A:A2M-AS1:ss1388099740	-5.06402	0.04029	0.0518625	anno;
A2M-AS1_2	12:9434940:A:G:A2M-AS1:ss1388099744	-5.06402	0.04029	0.0518625	anno;
A2M-AS1_2	12:9436055:T:C:A2M-AS1:ss1388099787	-5.05143	0.109682	0.0501967	anno;Promoter|
A2M-AS1_2	12:9432903:A:G:A2M-AS1:ss1388099683	-5.06436	0.0372874	0.0486107	anno;
A2M-AS1_2	12:9434815:G:T:A2M-AS1:ss1388099738	-5.04889	0.0366562	0.0474866	anno;
A2M-AS1_2	12:9432952:G:A:A2M-AS1:ss1388099686	-5.06402	0.0337053	0.0440643	anno;
A2M-AS1_2	12:9448920:G:T:A2M-AS1:ss1388100024	-5.94227	0.0679894	0.0386507	anno;
A2M-AS1_1	12:9214659:G:A:A2M-AS1:ss1388093523	9.77415	0.0154853	0.0306754	anno;
A2M-AS1_1	12:9233552:T:C:A2M-AS1:ss1388094053	9.81478	0.0152377	0.0298659	anno;
A2M-AS1_1	12:9234098:A:G:A2M-AS1:ss1388094066	9.81475	0.0152347	0.029859	anno;
A2M-AS1_1	12:9235427:G:C:A2M-AS1:ss1388094102	9.81432	0.0151978	0.0297711	anno;
A2M-AS1_1	12:9235739:A:G:A2M-AS1:ss1388094110	9.81411	0.01518	0.0297288	anno;
A2M-AS1_1	12:9238212:C:G:A2M-AS1:ss1388094171	9.81207	0.0150096	0.0293237	anno;
A2M-AS1_1	12:9238311:A:G:A2M-AS1:ss1388094178	9.81151	0.0149632	0.0292134	anno;
A2M-AS1_1	12:9228255:C:T:A2M-AS1:ss1388093904	9.81877	0.0134652	0.0257192	anno;
A2M-AS1_1	12:9228298:C:T:A2M-AS1:ss1388093906	9.81877	0.0134652	0.0257192	anno;
A2M-AS1_1	12:9228434:C:T:A2M-AS1:ss1388093911	9.81877	0.0134652	0.0257192	anno;
A2M-AS1_1	12:9228631:T:C:A2M-AS1:ss1388093915	9.81877	0.0134652	0.0257192	anno;
A2M-AS1_1	12:9228644:C:T:A2M-AS1:ss1388093917	9.81877	0.0134652	0.0257192	anno;
A2M-AS1_1	12:9228823:G:A:A2M-AS1:ss1388093921	9.81877	0.0134652	0.0257192	anno;
A2M-AS1_1	12:9229157:A:G:A2M-AS1:ss1388093928	9.81877	0.0134652	0.0257192	anno;
A2M-AS1_1	12:9229170:T:C:A2M-AS1:ss1388093929	9.81877	0.0134652	0.0257192	anno;
A2M-AS1_1	12:9229629:T:C:A2M-AS1:ss1388093939	9.81877	0.0134652	0.0257192	anno;
A2M-AS1_1	12:9230038:T:C:A2M-AS1:ss1388093954	9.81877	0.0386345	0.0257192	anno;peak|
A2M-AS1_1	12:9230131:A:G:A2M-AS1:ss1388093959	9.81877	0.0134652	0.0257192	anno;peak|
A2M-AS1_1	12:9230572:T:G:A2M-AS1:ss1388093966	9.81877	0.0134652	0.0257192	anno;
A2M-AS1_1	12:9230662:A:T:A2M-AS1:ss1388093969	9.81877	0.0134652	0.0257192	anno;
A2M-AS1_1	12:9230706:T:C:A2M-AS1:ss1388093972	9.81877	0.0134652	0.0257192	anno;
A2M-AS1_1	12:9230732:A:G:A2M-AS1:ss1388093974	9.81877	0.0134652	0.0257192	anno;
A2M-AS1_1	12:9232268:C:T:A2M-AS1:ss1388094016	9.81877	0.213405	0.0257192	anno;Exon|
A2M-AS1_1	12:9228024:G:T:A2M-AS1:ss1388093890	9.81865	0.0134577	0.0257015	anno;
A2M-AS1_1	12:9228031:G:A:A2M-AS1:ss1388093893	9.81865	0.0134577	0.0257015	anno;
A2M-AS1_1	12:9227868:A:T:A2M-AS1:ss1388093885	9.81859	0.0134541	0.0256927	anno;
A2M-AS1_1	12:9227058:A:T:A2M-AS1:ss1388093862	9.81825	0.0134318	0.0256396	anno;
A2M-AS1_1	12:9212951:C:T:A2M-AS1:ss1388093469	9.85184	0.0134258	0.0252604	anno;
A2M-AS1_1	12:9226224:A:G:A2M-AS1:ss1388093843	9.81535	0.0132487	0.0252028	anno;
A2M-AS1_1	12:9231638:C:T:A2M-AS1:ss1388093997	9.819	0.0130938	0.0248588	anno;
A2M-AS1_1	12:9223953:T:C:A2M-AS1:ss1388093785	9.81414	0.0127784	0.0238253	anno;
A2M-AS1_1	12:9223696:A:G:A2M-AS1:ss1388093779	9.79661	0.012205	0.0227143	anno;
A2M-AS1_1	12:9223635:C:T:A2M-AS1:ss1388093776	9.79607	0.0121783	0.0226508	anno;
A2M-AS1_1	12:9223574:T:G:A2M-AS1:ss1388093772	9.79576	0.0118697	0.0219331	anno;
A2M-AS1_1	12:9222902:G:A:A2M-AS1:ss1388093755	9.78972	0.0118755	0.0219293	anno;
A2M-AS1_1	12:9222097:C:G:A2M-AS1:ss1388093724	9.7859	0.0114198	0.020661	anno;
A2M-AS1_1	12:9218000:C:T:A2M-AS1:ss1388093591	9.78347	0.285991	0.0204745	anno;Promoter|
A2ML1_1	12:9015779:C:G:A2ML1:ss1388087941	4.76709	0.517136	0.517136	anno;
A2ML1_1	12:9014717:C:T:A2ML1:ss1388087898	4.68325	0.35429	0.35429	anno;
A2ML1_1	12:9015996:T:C:A2ML1:ss1388087957	4.45078	0.128573	0.128573	anno;
A2M_1	12:9311678:A:G:A2M:ss1388096110	-9.20257	0.0538787	0.116336	anno;
A2M_1	12:9311281:T:C:A2M:ss1388096099	-9.19359	0.0476215	0.109911	anno;peak|
A2M_1	12:9311251:G:C:A2M:ss1388096097	-9.19355	0.0475983	0.109887	anno;peak|
A2M_1	12:9309995:A:G:A2M:ss1388096058	-9.19293	0.441997	0.109463	anno;CRE|DAR|peak|
A2M_1	12:9287162:G:T:A2M:ss1388095491	-9.1797	0.0376386	0.106072	anno;
A2M_1	12:9292598:A:G:A2M:ss1388095619	-9.18023	0.0396403	0.101345	anno;
A2M_1	12:9293474:G:A:A2M:ss1388095641	-9.18023	0.0396403	0.101345	anno;
A2M_1	12:9295457:T:C:A2M:ss1388095688	-9.18023	0.0396403	0.101345	anno;
A2M_1	12:9295512:G:A:A2M:ss1388095689	-9.18023	0.0396403	0.101345	anno;
A2M_1	12:9289549:A:C:A2M:ss1388095550	-9.17827	0.0385835	0.100175	anno;
A2M_1	12:9290862:G:A:A2M:ss1388095570	-9.17963	0.0404964	0.0994029	anno;
A2M_1	12:9285974:G:A:A2M:ss1388095462	-9.15985	0.0312865	0.0954351	anno;
A2M_1	12:9313304:G:A:A2M:ss1388096149	-9.13693	0.0172904	0.0817798	anno;
A2M_1	12:9284050:G:C:A2M:ss1388095414	-9.10349	0.0229558	0.0725846	anno;
A2M_1	12:9282913:A:G:A2M:ss1388095386	-9.09502	0.0204425	0.0699892	anno;
A2M_1	12:9278681:G:A:A2M:ss1388095293	-9.06441	0.0113179	0.0621061	anno;
A2M_1	12:9275778:T:C:A2M:ss1388095219	-9.04663	0.022941	0.0596657	anno;
A4GALT_1	22:43263432:A:G:A4GALT:rs5759002	6.0273	0.0167796	0.0258143	anno;
A4GALT_1	22:43291529:A:C:A4GALT:rs5759015	-5.9568	0.0322714	0.017129	anno;
A4GALT_1	22:43311010:T:C:A4GALT:rs2267473	-5.95501	0.0110197	0.0169532	anno;peak|
A4GALT_1	22:43308526:T:G:A4GALT:rs5759029	-5.95465	0.0109966	0.0169176	anno;peak|
A4GALT_1	22:43311523:A:G:A4GALT:rs5751402	-5.95463	0.0318684	0.0169152	anno;
A4GALT_1	22:43303687:A:G:A4GALT:rs2017874	-5.94913	0.0308719	0.0163862	anno;peak|
A4GALT_1	22:43312615:T:C:A4GALT:rs8142102	-5.94384	0.0299434	0.0158934	anno;peak|
A4GALT_1	22:43298697:G:A:A4GALT:rs4822224	-5.93565	0.00985442	0.0151605	anno;
A4GALT_1	22:43296317:T:C:A4GALT:rs6519349	-5.92774	0.00941551	0.0144852	anno;
A4GALT_1	22:43298810:A:G:A4GALT:rs5759019	-5.92592	0.00931757	0.0143346	anno;
A4GALT_1	22:43297680:T:C:A4GALT:rs7285844	-5.92576	0.0269806	0.0143208	anno;
A4GALT_1	22:43297397:A:G:A4GALT:rs9611957	-5.9257	0.00930565	0.0143162	anno;
A4GALT_1	22:43296474:T:A:A4GALT:rs6519351	-5.92559	0.00929966	0.014307	anno;
A4GALT_1	22:43296051:A:C:A4GALT:rs2002595	-5.92553	0.00929669	0.0143024	anno;
A4GALT_1	22:43292632:T:C:A4GALT:rs4588289	-5.92503	0.00926978	0.014261	anno;
A4GALT_1	22:43323582:T:G:A4GALT:rs8136052	-5.9176	0.00888206	0.0136646	anno;
A4GALT_1	22:43316145:A:G:A4GALT:rs8135794	-5.91139	0.00857116	0.0131863	anno;
A4GALT_1	22:43316232:A:G:A4GALT:rs8135830	-5.90931	0.00846942	0.0130297	anno;
A4GALT_1	22:43278220:T:C:A4GALT:rs2899365	-5.90466	0.0239019	0.0126868	anno;Exon|
A4GALT_1	22:43283989:T:C:A4GALT:rs9611954	-5.90466	0.00824647	0.0126868	anno;peak|
A4GALT_1	22:43284334:A:G:A4GALT:rs9607978	-5.90466	0.00824647	0.0126868	anno;peak|
A4GALT_1	22:43285309:T:C:A4GALT:rs5751399	-5.90466	0.00824647	0.0126868	anno;
A4GALT_1	22:43285922:T:C:A4GALT:rs7288133	-5.90466	0.00824647	0.0126868	anno;
A4GALT_1	22:43286876:G:A:A4GALT:rs5759012	-5.90466	0.00824647	0.0126868	anno;
A4GALT_1	22:43277147:G:A:A4GALT:rs4822216	-5.90282	0.00815973	0.0125533	anno;peak|
A4GALT_1	22:43274722:A:G:A4GALT:rs9611950	-5.90247	0.00814362	0.0125285	anno;
A4GALT_1	22:43274772:G:A:A4GALT:rs9611951	-5.90244	0.00814222	0.0125264	anno;
A4GALT_1	22:43274889:A:G:A4GALT:rs9611952	-5.90244	0.00814222	0.0125264	anno;
A4GALT_1	22:43274283:T:C:A4GALT:rs5759007	-5.90229	0.00813501	0.0125153	anno;
A4GALT_1	22:43273891:G:T:A4GALT:rs4822215	-5.9019	0.0235265	0.0124875	anno;peak|
A4GALT_1	22:43273740:G:C:A4GALT:rs5759006	-5.9018	0.0235138	0.0124808	anno;peak|
A4GALT_1	22:43317129:A:G:A4GALT:rs2413735	-5.90005	0.00803153	0.0123561	anno;
A4GALT_1	22:43317568:C:A:A4GALT:rs9607980	-5.89944	0.00800345	0.0123129	anno;peak|
A4GALT_1	22:43318948:C:G:A4GALT:rs2092212	-5.89901	0.0231408	0.0122828	anno;peak|
A4GALT_1	22:43318648:C:G:A4GALT:rs2092209	-5.89853	0.0230775	0.0122492	anno;peak|
A4GALT_1	22:43318700:A:G:A4GALT:rs2092210	-5.89846	0.0230681	0.0122442	anno;peak|
A4GALT_1	22:43319320:C:T:A4GALT:rs738385	-5.89794	0.0229991	0.0122076	anno;
A4GALT_1	22:43319558:T:C:A4GALT:rs1807570	-5.89791	0.00793347	0.0122052	anno;
A4GALT_1	22:43319703:G:C:A4GALT:rs8141945	-5.89746	0.00791322	0.0121741	anno;
A4GALT_1	22:43319527:A:G:A4GALT:rs1807569	-5.89656	0.00787265	0.0121117	anno;
A4GALT_1	22:43317899:T:C:A4GALT:rs4822227	-5.89471	0.00778968	0.011984	anno;
A4GALT_1	22:43324183:T:C:A4GALT:rs5759042	-5.85364	0.00616299	0.00948149	anno;
A4GALT_1	22:43279282:G:A:A4GALT:rs9611953	-5.84703	0.0172048	0.00913209	anno;peak|
A4GALT_1	22:43262745:T:C:A4GALT:rs5759000	-5.84391	0.00583159	0.00897164	anno;
A4GALT_1	22:43303417:G:T:A4GALT:rs732439	-5.8423	0.00577872	0.00889031	anno;
A4GALT_1	22:43324565:A:G:A4GALT:rs7290497	-5.84209	0.00577196	0.00887991	anno;
A4GALT_1	22:43262740:C:T:A4GALT:rs5758999	-5.83111	0.00542356	0.00834392	anno;
A4GALT_1	22:43294744:C:T:A4GALT:rs4822223	-5.8189	0.00506174	0.00778728	anno;peak|
A4GALT_1	22:43315393:C:T:A4GALT:rs738383	-5.81484	0.0143385	0.00761069	anno;peak|
A4GALT_1	22:43299294:A:T:A4GALT:rs1076117	-5.80845	0.0138309	0.00734128	anno;peak|
A4GALT_1	22:43281581:C:G:A4GALT:rs4820493	-5.79858	0.00451378	0.00694428	anno;
A4GALT_1	22:43281879:G:A:A4GALT:rs738538	-5.79858	0.00451378	0.00694428	anno;
A4GALT_1	22:43283255:C:A:A4GALT:rs2267463	-5.79858	0.00451378	0.00694428	anno;
A4GALT_1	22:43290583:C:T:A4GALT:rs4822220	-5.79858	0.00451378	0.00694428	anno;peak|
A4GALT_1	22:43291095:T:C:A4GALT:rs3091382	-5.79858	0.0130829	0.00694428	anno;CRE|DAR|peak|
A4GALT_1	22:43278162:C:T:A4GALT:rs4822217	-5.79817	0.0130522	0.00692799	anno;
A4GALT_1	22:43276030:C:A:A4GALT:rs4820492	-5.79644	0.00445973	0.00686113	anno;peak|
A4GALT_1	22:43272792:T:C:A4GALT:rs5751397	-5.79456	0.00441281	0.00678894	anno;peak|
A4GALT_1	22:43272085:C:G:A4GALT:rs5751396	-5.79288	0.00437116	0.00672487	anno;
A4GALT_1	22:43252280:G:A:A4GALT:rs5758990	-5.792	0.012607	0.00669168	anno;
A4GALT_1	22:43271171:C:T:A4GALT:rs2007395	-5.79114	0.00432855	0.00665932	anno;
A4GALT_1	22:43249093:C:T:A4GALT:rs5758988	-5.79111	0.00432795	0.00665839	anno;
A4GALT_1	22:43270440:C:A:A4GALT:rs2092664	-5.7904	0.00431062	0.00663173	anno;
A4GALT_1	22:43270819:G:A:A4GALT:rs4822213	-5.7904	0.0124941	0.00663173	anno;peak|
A4GALT_1	22:43269547:T:C:A4GALT:rs2267461	-5.79033	0.0124891	0.00662905	anno;
A4GALT_1	22:43268502:G:A:A4GALT:rs9607973	-5.79029	0.00430801	0.00662772	anno;
A4GALT_1	22:43266363:T:C:A4GALT:rs7073	-5.79018	0.00430538	0.00662367	anno;3_UTR|peak|
A4GALT_1	22:43265827:T:G:A4GALT:rs7074	-5.79015	0.00430451	0.00662233	anno;3_UTR|
A4GALT_1	22:43264770:G:A:A4GALT:rs4822210	-5.79011	0.0124738	0.00662097	anno;DAR|peak|
A4GALT_1	22:43264851:C:T:A4GALT:rs5759003	-5.79011	0.0124738	0.00662097	anno;DAR|peak|
A4GALT_1	22:43264252:G:A:A4GALT:rs5751393	-5.79007	0.0124713	0.00661962	anno;
A4GALT_1	22:43261499:A:G:A4GALT:rs5751391	-5.78993	0.00429922	0.00661419	anno;
A4GALT_1	22:43261694:G:T:A4GALT:rs5751392	-5.78993	0.00429922	0.00661419	anno;
A4GALT_1	22:43260427:A:G:A4GALT:rs738536	-5.78989	0.00429833	0.00661282	anno;
A4GALT_1	22:43259172:C:T:A4GALT:rs5758995	-5.78982	0.00429655	0.00661008	anno;
A4GALT_1	22:43257945:T:C:A4GALT:rs5758994	-5.78974	0.00429476	0.00660733	anno;
A4GALT_1	22:43257261:G:A:A4GALT:rs4822207	-5.78971	0.00429387	0.00660595	anno;peak|
A4GALT_1	22:43255397:A:T:A4GALT:rs1983648	-5.78963	0.00429207	0.00660319	anno;
A4GALT_1	22:43255609:C:T:A4GALT:rs9607968	-5.78963	0.00429207	0.00660319	anno;peak|
A4GALT_1	22:43261223:T:C:A4GALT:rs4822208	-5.7895	0.00428895	0.00659839	anno;
A4GALT_1	22:43193323:C:T:A4GALT:rs5751372	-5.78834	0.00426094	0.0065553	anno;3_UTR|
A4GALT_1	22:43244723:T:A:A4GALT:rs5758982	-5.77842	0.0040302	0.00620032	anno;
A4GALT_1	22:43241787:T:C:A4GALT:rs5751385	-5.77769	0.00401373	0.00617499	anno;
A4GALT_1	22:43270877:G:A:A4GALT:rs2092665	-5.7686	0.0110556	0.00586823	anno;peak|
A4GALT_1	22:43270879:C:A:A4GALT:rs2092666	-5.7686	0.0110556	0.00586823	anno;peak|
A4GALT_1	22:43262513:G:A:A4GALT:rs7287107	-5.76565	0.00375192	0.0057722	anno;
A4GALT_1	22:43256166:G:A:A4GALT:rs9607970	-5.75554	0.0035456	0.00545479	anno;
A4GALT_1	22:43235156:A:C:A4GALT:rs4822202	-5.75511	0.00353714	0.00544177	anno;
A4GALT_1	22:43202340:A:G:A4GALT:rs2413726	-5.75473	0.0102302	0.00543011	anno;DAR|peak|
A4GALT_1	22:43200220:T:C:A4GALT:rs2413723	-5.75328	0.00350101	0.0053862	anno;peak|
A4GALT_1	22:43206228:C:G:A4GALT:rs6002956	-5.7512	0.00346074	0.00532424	anno;peak|
A4GALT_1	22:43200448:C:T:A4GALT:rs2899363	-5.75111	0.00345903	0.00532161	anno;peak|
A4GALT_1	22:43215470:T:C:A4GALT:rs8141000	-5.75093	0.00345547	0.00531614	anno;
A4GALT_1	22:43216733:G:A:A4GALT:rs9607955	-5.75093	0.00345547	0.00531614	anno;
A4GALT_1	22:43219836:G:C:A4GALT:rs5751378	-5.75093	0.00345547	0.00531614	anno;
A4GALT_1	22:43228345:T:C:A4GALT:rs5751381	-5.75025	0.00344232	0.0052959	anno;
A4GALT_1	22:43228789:C:T:A4GALT:rs5758968	-5.75025	0.00344232	0.0052959	anno;
A4GALT_1	22:43228969:C:A:A4GALT:rs5758969	-5.75025	0.00344232	0.0052959	anno;
A4GALT_1	22:43230140:G:C:A4GALT:rs2273142	-5.75025	0.00344232	0.0052959	anno;
AACS_1	12:125699648:T:C:AACS:rs4765228	-4.03067	0.206439	0.241949	anno;
AACS_1	12:125603152:T:C:AACS:rs35814268	-4.48361	0.132084	0.15921	anno;
AACS_2	12:125646283:G:C:AACS:rs12823172	4.35752	0.342589	0.152893	anno;peak|
AACS_1	12:125637541:C:A:AACS:rs34479569	-4.46277	0.104226	0.125636	anno;
AACS_2	12:125658174:C:T:AACS:rs34579346	4.22004	0.0742727	0.0961104	anno;
AACS_2	12:125658603:T:C:AACS:rs35698828	4.21112	0.0705879	0.0912858	anno;
AACS_1	12:125674429:T:C:AACS:rs1571884	-4.20658	0.0691276	0.082707	anno;peak|
AACS_1	12:125674490:A:G:AACS:rs1571885	-4.20635	0.0690802	0.0826498	anno;peak|
AACS_2	12:125654641:C:T:AACS:rs12581367	4.15293	0.06032	0.0779256	anno;
AACS_2	12:125656263:T:C:AACS:rs12831151	4.1472	0.0592865	0.0765925	anno;
AACS_2	12:125648197:A:G:AACS:rs35508749	4.14035	0.0580758	0.0750308	anno;
AACS_2	12:125647456:T:C:AACS:rs2062150	4.13792	0.0576535	0.0744859	anno;
AACS_2	12:125651442:G:A:AACS:rs36097456	4.12918	0.0561609	0.0725604	anno;
AACS_1	12:125640788:C:T:AACS:rs2170624	-4.32214	0.0588729	0.0714771	anno;
AACS_2	12:125656402:G:A:AACS:rs12581813	4.10859	0.0540438	0.0698727	anno;
AACS_2	12:125653490:T:C:AACS:rs12811438	4.10524	0.0535064	0.0691789	anno;
AACS_2	12:125647752:T:C:AACS:rs12579211	4.10281	0.0531206	0.0686808	anno;peak|
AACS_2	12:125651823:T:C:AACS:rs12822191	4.10165	0.0529369	0.0684435	anno;
AACS_1	12:125669216:T:C:AACS:rs10773147	-4.10278	0.135676	0.0560706	anno;DAR|peak|
AACS_1	12:125651631:C:T:AACS:rs11058060	-4.08294	0.0417706	0.0499347	anno;
AACS_1	12:125646451:A:C:AACS:rs11058057	-4.107	0.113755	0.0470762	anno;peak|
AACS_1	12:125665242:A:G:AACS:rs12809174	-4.08115	0.0365892	0.0437957	anno;
AACS_1	12:125656727:T:C:AACS:rs4237992	-4.07981	0.0364491	0.0436248	anno;
AADAT_2	4:170990053:T:C:AADAT:rs2279267	7.73978	0.411099	0.44724	anno;
AADAT_1	4:170931223:T:C:AADAT:rs4692780	-8.38022	0.653067	0.401213	anno;peak|
AADAT_2	4:170975204:C:T:AADAT:rs12650424	7.7361	0.332503	0.36415	anno;
AADAT_1	4:170928045:T:C:AADAT:rs6844099	-8.31641	0.167533	0.298094	anno;
AADAT_1	4:170929075:A:G:AADAT:rs11935418	-8.30319	0.157622	0.280446	anno;peak|
AADAT_3	4:171040214:G:T:AADAT:rs190657226	-7.44234	0.178841	0.215686	anno;
AADAT_2	4:170967028:A:C:AADAT:rs13141331	7.4161	0.0875028	0.032989	anno;
AADAT_3	4:171049059:T:C:AADAT:rs111323769	-7.43256	0.0221174	0.0264737	anno;
AADAT_2	4:170965709:T:C:AADAT:rs13133562	7.40526	0.0204136	0.0222144	anno;
AADAT_2	4:170964896:T:C:AADAT:rs12642583	7.40196	0.0200195	0.0217849	anno;
AADAT_2	4:170963591:A:G:AADAT:rs62344679	7.39647	0.0193822	0.0210907	anno;
AADAT_2	4:170962516:G:A:AADAT:rs6817357	7.39186	0.0188637	0.0205258	anno;
AADAT_3	4:171036112:G:A:AADAT:rs113572538	-7.5389	0.0161093	0.0192595	anno;
AADAT_3	4:171038903:T:G:AADAT:rs139361559	-7.5389	0.0161093	0.0192595	anno;
AADAT_3	4:171051123:C:T:AADAT:rs4692801	-7.5389	0.0161093	0.0192595	anno;
AADAT_3	4:171053519:A:G:AADAT:rs11726248	-7.5389	0.0161093	0.0192595	anno;
AADAT_3	4:171053563:A:G:AADAT:rs11726249	-7.5389	0.0161093	0.0192595	anno;
AADAT_3	4:171051627:T:C:AADAT:rs11732383	-7.57355	0.0157381	0.0188155	anno;
AADAT_3	4:171031170:T:C:AADAT:rs11736939	-7.5389	0.04467	0.0185013	anno;DAR|peak|
AADAT_3	4:171031611:A:G:AADAT:rs79488685	-7.5389	0.04467	0.0185013	anno;peak|
AADAT_3	4:171032231:G:A:AADAT:rs76393969	-7.5389	0.04467	0.0185013	anno;
AADAT_3	4:171030807:C:T:AADAT:rs17628931	-7.53741	0.0443694	0.0183769	anno;DAR|peak|
AADAT_3	4:171028664:T:G:AADAT:rs28417607	-7.53527	0.0151713	0.0181993	anno;
AADAT_3	4:171028516:A:C:AADAT:rs28626594	-7.535	0.0151529	0.0181773	anno;
AADAT_3	4:171027704:G:T:AADAT:rs6822866	-7.53435	0.0151078	0.0181232	anno;
AADAT_3	4:171024744:A:G:AADAT:rs77855653	-7.53113	0.0148892	0.0178611	anno;
AADAT_3	4:171024601:A:G:AADAT:rs77665099	-7.53079	0.014866	0.0178332	anno;
AADAT_3	4:171024528:G:A:AADAT:rs113751790	-7.53062	0.0148544	0.0178193	anno;
AADAT_3	4:171021499:T:G:AADAT:rs6846741	-7.50129	0.0148073	0.0177826	anno;
AADAT_3	4:171023301:T:C:AADAT:rs11733850	-7.52925	0.0147629	0.0177096	anno;
AADAT_3	4:171021185:T:C:AADAT:rs17628895	-7.53898	0.0145702	0.0174889	anno;
AADAT_3	4:171020067:A:T:AADAT:rs75336711	-7.58622	0.0144306	0.0173096	anno;
AADAT_3	4:171019391:T:C:AADAT:rs11729169	-7.53571	0.0143563	0.0172322	anno;
AADAT_3	4:171019411:C:T:AADAT:rs78027130	-7.58428	0.0143047	0.0171587	anno;
AADAT_3	4:171018383:T:C:AADAT:rs4692793	-7.58075	0.0140781	0.016887	anno;
AADAT_3	4:171016540:A:G:AADAT:rs4692792	-7.53118	0.0140653	0.0168831	anno;
AADAT_3	4:171017475:G:A:AADAT:rs6828499	-7.57945	0.0139958	0.0167884	anno;
AADAT_3	4:171014655:C:G:AADAT:rs79751662	-7.57235	0.013555	0.0162598	anno;
AADAT_3	4:171014283:C:G:AADAT:rs74703215	-7.57139	0.0134966	0.0161898	anno;
AADAT_3	4:171013752:A:G:AADAT:rs77314892	-7.56993	0.0134078	0.0160833	anno;peak|
AADAT_3	4:171013233:C:T:AADAT:rs112071449	-7.56865	0.0133309	0.0159912	anno;peak|
AADAT_3	4:171040332:G:A:AADAT:rs148577353	-7.44439	0.0132925	0.0159033	anno;
AADAT_3	4:171012741:C:T:AADAT:rs4692791	-7.56732	0.0132518	0.0158963	anno;
AADAT_3	4:171012708:C:T:AADAT:rs4692790	-7.56719	0.0132437	0.0158866	anno;peak|
AADAT_3	4:171040797:G:A:AADAT:rs189595752	-7.44311	0.0132165	0.0158124	anno;
AADAT_3	4:171047434:A:G:AADAT:rs113752978	-7.44311	0.0132162	0.0158121	anno;
AADAT_3	4:171049923:C:T:AADAT:rs113031122	-7.44303	0.0382657	0.0158068	anno;
AADAT_3	4:171024368:A:G:AADAT:rs112564090	-7.43351	0.0120781	0.0144999	anno;
AADAT_3	4:171010101:A:G:AADAT:rs11732763	-7.49014	0.0338898	0.0140457	anno;peak|
AADAT_3	4:171007504:T:C:AADAT:rs716822	-7.5356	0.0114408	0.0137061	anno;
AADAT_3	4:171039654:T:C:AADAT:rs114809993	-7.40592	0.00889511	0.0106379	anno;
AADAT_2	4:170960193:T:C:AADAT:rs6821641	7.38411	0.00973109	0.0104935	anno;
AADAT_3	4:171002401:T:C:AADAT:rs77489187	-7.48258	0.0085961	0.0103335	anno;
AADAT_2	4:170961308:A:G:AADAT:rs62344678	7.38596	0.00945963	0.0102155	anno;peak|
AADAT_3	4:171009009:A:G:AADAT:rs17628883	-7.52608	0.00836531	0.0100339	anno;
AADAT_2	4:170960284:G:A:AADAT:rs34149802	7.38136	0.00921568	0.00995225	anno;
AADAT_3	4:171036205:T:G:AADAT:rs199787545	-7.2264	0.00717187	0.0085423	anno;
AADAT_3	4:171006215:C:T:AADAT:rs11731442	-7.53563	0.00669082	0.00803739	anno;
AADAT_3	4:171001269:A:T:AADAT:rs76029311	-7.52722	0.0064558	0.0077552	anno;
AADAT_3	4:170999468:G:A:AADAT:rs79603910	-7.51984	0.00625682	0.00751628	anno;
AADAT_3	4:171063897:G:A:AADAT:rs113104740	-7.28311	0.00536761	0.00641331	anno;
AADAT_3	4:171082172:A:G:AADAT:rs1947859	-7.47858	0.00475936	0.00565323	anno;
AADAT_3	4:171087355:T:G:AADAT:rs185400331	-7.47773	0.00474304	0.00563389	anno;
AAED1_1	9:99480940:G:T:AAED1:rs10816458	-4.75703	0.0411961	0.0583581	anno;
AAED1_1	9:99483442:T:C:AAED1:rs2278648	-4.75694	0.0411798	0.058335	anno;
AAED1_1	9:99486241:T:C:AAED1:rs7039498	-4.66472	0.0272288	0.0385756	anno;
AAED1_1	9:99448564:C:T:AAED1:rs2165890	-4.6645	0.0272032	0.0385392	anno;peak|
AAED1_1	9:99485907:C:A:AAED1:rs77365293	-4.66424	0.0271717	0.0384947	anno;
AAED1_1	9:99476080:G:A:AAED1:rs7034729	-4.66104	0.0776449	0.0379519	anno;peak|
AAED1_1	9:99478181:T:C:AAED1:rs141542925	-4.65945	0.0770981	0.0376847	anno;
AAED1_1	9:99619081:T:C:AAED1:rs2296812	-4.65534	0.0757063	0.0370045	anno;peak|
AAED1_1	9:99468996:A:C:AAED1:rs76481767	-4.65062	0.0741374	0.0362378	anno;
AAED1_1	9:99449290:T:C:AAED1:rs10978594	-4.6426	0.0715544	0.0349755	anno;peak|
AAED1_1	9:99453855:C:T:AAED1:rs10739226	-4.64221	0.0246441	0.0349145	anno;peak|
AAED1_1	9:99454284:T:C:AAED1:rs10978615	-4.64221	0.0246441	0.0349145	anno;peak|
AAED1_1	9:99455367:A:G:AAED1:rs10759194	-4.64221	0.0246441	0.0349145	anno;
AAED1_1	9:99456705:T:C:AAED1:rs4532707	-4.64221	0.0246441	0.0349145	anno;
AAED1_1	9:99447888:G:C:AAED1:rs10759192	-4.64147	0.0245642	0.0348013	anno;peak|
AAED1_1	9:99444929:G:T:AAED1:rs10978574	-4.63541	0.0239155	0.0338825	anno;
AAED1_1	9:99620270:T:A:AAED1:rs10816667	-4.62153	0.0224966	0.0318727	anno;peak|
AAED1_1	9:99699485:C:G:AAED1:rs7866127	-4.62063	0.0224073	0.0317461	anno;Exon|
AAED1_1	9:99477258:A:G:AAED1:rs10816457	-4.61499	0.0218588	0.0309693	anno;
AAED1_1	9:99675221:T:G:AAED1:rs370198822	-4.58434	0.019113	0.0270798	anno;
AAED1_1	9:99477843:C:T:AAED1:rs2120259	-4.34911	0.00702827	0.00995999	anno;
AAED1_1	9:99445455:C:G:AAED1:rs10759189	-4.33973	0.00676073	0.00958093	anno;
AAED1_1	9:99443512:C:T:AAED1:rs6477616	-4.33001	0.0188253	0.0092044	anno;
AAED1_1	9:99470002:G:A:AAED1:rs10978667	-4.32008	0.0180709	0.00883563	anno;peak|
AAED1_1	9:99486817:G:A:AAED1:rs6477657	-4.29767	0.0056871	0.00805974	anno;
AAED1_1	9:99463539:T:C:AAED1:rs10122404	-4.25088	0.0136254	0.00666244	anno;
AAED1_1	9:99470888:G:A:AAED1:rs28744544	-4.24178	0.00453118	0.00642189	anno;
AAED1_1	9:99470801:A:C:AAED1:rs10816450	-4.2415	0.00452594	0.00641447	anno;
AAED1_1	9:99470619:G:A:AAED1:rs10978668	-4.24139	0.00452402	0.00641175	anno;
AAED1_1	9:99470835:C:T:AAED1:rs10816451	-4.24134	0.00452301	0.00641031	anno;
AAED1_1	9:99471854:G:C:AAED1:rs12351755	-4.24132	0.00452262	0.00640976	anno;
AAED1_1	9:99473335:A:G:AAED1:rs10119476	-4.24017	0.00450182	0.00638029	anno;
AAED1_1	9:99467539:T:C:AAED1:rs10125803	-4.24013	0.0130458	0.00637908	anno;
AAED1_1	9:99452916:T:A:AAED1:rs10816427	-4.23949	0.00448938	0.00636267	anno;
AAED1_1	9:99452968:G:T:AAED1:rs10978609	-4.23949	0.00448938	0.00636267	anno;
AAED1_1	9:99455673:C:T:AAED1:rs10123868	-4.23949	0.00448938	0.00636267	anno;
AAED1_1	9:99455929:A:C:AAED1:rs10120129	-4.23949	0.00448938	0.00636267	anno;
AAED1_1	9:99456160:C:T:AAED1:rs10759196	-4.23949	0.00448938	0.00636267	anno;
AAED1_1	9:99456161:A:T:AAED1:rs10816430	-4.23949	0.00448938	0.00636267	anno;
AAED1_1	9:99457956:T:G:AAED1:rs6477624	-4.23949	0.00448938	0.00636267	anno;
AAED1_1	9:99458826:G:A:AAED1:rs10978636	-4.23949	0.00448938	0.00636267	anno;
AAED1_1	9:99460364:G:A:AAED1:rs10816433	-4.23949	0.00448938	0.00636267	anno;
AAED1_1	9:99461810:C:T:AAED1:rs2083825	-4.23949	0.00448938	0.00636267	anno;
AAED1_1	9:99462122:A:G:AAED1:rs10816435	-4.23949	0.00448938	0.00636267	anno;
AAED1_1	9:99462435:C:T:AAED1:rs10816437	-4.23949	0.00448938	0.00636267	anno;
AAED1_1	9:99462625:A:G:AAED1:rs10759202	-4.23949	0.00448938	0.00636267	anno;
AAED1_1	9:99463601:T:C:AAED1:rs10122421	-4.23949	0.00448938	0.00636267	anno;
AAED1_1	9:99463793:G:C:AAED1:rs10122477	-4.23949	0.00448938	0.00636267	anno;
AAED1_1	9:99463916:G:A:AAED1:rs10125623	-4.23949	0.00448938	0.00636267	anno;
AAED1_1	9:99464178:C:T:AAED1:rs7858050	-4.23949	0.00448938	0.00636267	anno;
AAGAB_1	15:67428334:T:C:AAGAB:rs2118610	4.66618	0.142065	0.181738	anno;
AAGAB_1	15:67425456:C:G:AAGAB:rs7178117	4.66368	0.140496	0.179731	anno;peak|
AAGAB_1	15:67423306:T:C:AAGAB:rs6494633	4.66324	0.140219	0.179376	anno;peak|
AAGAB_1	15:67420680:G:A:AAGAB:rs1545161	4.6609	0.138769	0.17752	anno;
AAGAB_1	15:67426602:A:G:AAGAB:rs34783441	4.6184	0.333271	0.147088	anno;DAR|peak|
AAGAB_1	15:67427897:T:A:AAGAB:rs28587205	4.59812	0.105181	0.134548	anno;
AAK1_2	2:70595465:G:C:AAK1:rs1478645	-3.9744	0.937565	0.965525	anno;
AAK1_1	2:69646504:A:G:AAK1:rs7605572	-5.60735	0.0183918	0.0597274	anno;
AAK1_1	2:69646236:A:G:AAK1:rs13388690	-5.60544	0.17006	0.0591103	anno;
AAK1_1	2:69645848:G:A:AAK1:rs111794927	-5.60225	0.167184	0.0580991	anno;
AAK1_1	2:69645828:T:C:AAK1:rs75137187	-5.6021	0.167045	0.0580501	anno;
AAK1_1	2:69645422:T:C:AAK1:rs67938413	-5.59813	0.16353	0.0568144	anno;CRE|peak|
AAK1_1	2:69648829:A:G:AAK1:rs7560364	-5.5551	0.0158275	0.0513795	anno;
AAK1_1	2:69672871:G:A:AAK1:rs112826171	-5.49583	0.0145816	0.0477155	anno;
AAK1_1	2:69642615:A:G:AAK1:rs7557646	-5.56187	0.0144303	0.0467175	anno;
AAK1_1	2:69640722:A:C:AAK1:rs12612489	-5.5579	0.0409297	0.0457299	anno;
AAK1_1	2:69640145:A:G:AAK1:rs7602427	-5.55705	0.0140665	0.0455226	anno;
AAK1_1	2:69677296:G:T:AAK1:rs66641893	-5.4655	0.0110216	0.0357608	anno;
AAK1_1	2:69582526:G:T:AAK1:rs55797343	-5.38945	0.00673454	0.0215062	anno;
AAK1_1	2:69704941:G:A:AAK1:rs2312205	-5.3818	0.0148541	0.0159597	anno;
AAK1_1	2:69704970:T:G:AAK1:rs11688141	-5.37602	0.00498582	0.0154966	anno;
AAK1_1	2:69647277:G:A:AAK1:rs4131555	-5.29592	0.00397797	0.0123622	anno;
AAK1_1	2:69560024:G:A:AAK1:rs12466648	-5.30544	0.0114767	0.0122755	anno;
AAK1_1	2:69649968:A:C:AAK1:rs112076318	-5.29542	0.00375958	0.0116194	anno;
AAK1_1	2:69650445:A:T:AAK1:rs67662551	-5.29524	0.0108816	0.011609	anno;
AAK1_1	2:69656354:C:T:AAK1:rs59129812	-5.29393	0.00373318	0.011533	anno;
AAK1_1	2:69564580:G:A:AAK1:rs72826571	-5.31826	0.00372113	0.0114867	anno;
AAK1_1	2:69558112:T:C:AAK1:rs12473304	-5.31625	0.00350505	0.0107637	anno;
AAK1_1	2:69556144:C:A:AAK1:rs55885494	-5.31572	0.00349639	0.0107354	anno;
AAK1_1	2:69555902:A:G:AAK1:rs55962715	-5.31544	0.00349173	0.0107202	anno;
AAK1_1	2:69567272:A:C:AAK1:rs72826573	-5.31498	0.00348415	0.0106954	anno;CRE|DAR|peak|
AAK1_1	2:69548495:G:T:AAK1:rs67016706	-5.3138	0.00346504	0.010633	anno;3_UTR|
AAK1_1	2:69546480:A:G:AAK1:rs56250322	-5.31183	0.00343313	0.0105289	anno;
AAK1_1	2:69533492:G:A:AAK1:rs60680381	-5.3092	0.00988928	0.0104608	anno;CRE|peak|
AAK1_1	2:69589883:T:C:AAK1:rs113952888	-5.30996	0.00340314	0.010431	anno;
AAK1_1	2:69599024:C:A:AAK1:rs67052036	-5.30984	0.00340135	0.0104251	anno;
AAK1_1	2:69574658:A:G:AAK1:rs7599338	-5.30926	0.00339205	0.0103947	anno;
AAK1_1	2:69529531:T:C:AAK1:rs12620315	-5.30631	0.00338982	0.0103802	anno;
AAK1_1	2:69580970:T:C:AAK1:rs66931274	-5.30881	0.00338489	0.0103714	anno;
AAK1_1	2:69584616:A:C:AAK1:rs67560216	-5.30881	0.00338489	0.0103714	anno;
AAK1_1	2:69645760:A:G:AAK1:rs112020804	-5.29677	0.0314474	0.010327	anno;
AAK1_1	2:69643848:G:T:AAK1:rs12618636	-5.27359	0.0030227	0.0092055	anno;
AAK1_1	2:69638700:G:T:AAK1:rs12466680	-5.25193	0.0027388	0.00827552	anno;
AAK1_1	2:69678853:C:T:AAK1:rs72833929	-5.1784	0.00268811	0.00819251	anno;
AAK1_1	2:69679197:A:G:AAK1:rs55932708	-5.17663	0.00266678	0.00812193	anno;
AAK1_1	2:69673898:C:T:AAK1:rs150923658	-5.17539	0.00265188	0.00807259	anno;
AAK1_1	2:69671683:C:A:AAK1:rs113394164	-5.1745	0.00264139	0.0080379	anno;
AAK1_1	2:69668004:A:C:AAK1:rs67481136	-5.17301	0.00262373	0.00797942	anno;
AAK1_1	2:69666626:G:C:AAK1:rs72833923	-5.17255	0.00261837	0.00796167	anno;peak|
AAK1_1	2:69666423:C:A:AAK1:rs149316175	-5.17246	0.00261723	0.0079579	anno;
AAK1_1	2:69664921:T:A:AAK1:rs67347664	-5.19938	0.0236249	0.00759942	anno;Promoter|
AAK1_1	2:69628491:G:T:AAK1:rs12477398	-5.18002	0.00221153	0.00656931	anno;
AAK1_1	2:69620650:C:G:AAK1:rs56175187	-5.19323	0.00615503	0.00626393	anno;peak|
AAK1_1	2:69632620:C:T:AAK1:rs6759021	-5.18223	0.00212106	0.00626032	anno;
AAK1_1	2:69615794:C:G:AAK1:rs67340771	-5.18112	0.0021109	0.00622693	anno;
AAK1_1	2:69618072:T:G:AAK1:rs6708008	-5.18088	0.00210877	0.00621991	anno;peak|
AAK1_1	2:69619288:A:G:AAK1:rs7563719	-5.18076	0.0021077	0.0062164	anno;peak|
AAK1_1	2:69631483:T:G:AAK1:rs112913113	-5.18067	0.00210685	0.00621362	anno;
AAK1_1	2:69623932:T:C:AAK1:rs6729268	-5.18042	0.00210462	0.00620628	anno;
AARS2_2	6:43951297:G:C:AARS2:rs13211044	4.26452	0.997267	0.998457	anno;
AARS2_1	6:44284899:T:C:AARS2:rs115268874	-4.91871	0.0253478	0.0909056	anno;
AARS2_1	6:44270870:T:C:AARS2:rs35623954	-4.86849	0.0241377	0.0860901	anno;Exon|
AARS2_1	6:44264037:A:C:AARS2:rs76323302	-4.86366	0.0235663	0.0840558	anno;
AARS2_1	6:44275195:T:G:AARS2:rs41282670	-4.86209	0.403898	0.0834041	anno;3_UTR|
AARS2_1	6:44275517:T:G:AARS2:rs76731976	-4.75341	0.230034	0.0475809	anno;3_UTR|
AARS2_1	6:44269570:T:C:AARS2:rs2236500	-4.69026	0.0321004	0.0394437	anno;peak|
AARS2_1	6:44258330:A:G:AARS2:rs79959806	-4.70825	0.0107143	0.0382872	anno;
AARS2_1	6:44259737:C:G:AARS2:rs79067180	-4.70812	0.0310339	0.0382638	anno;peak|
AARS2_1	6:44257684:T:C:AARS2:rs76138074	-4.7079	0.0310022	0.0382247	anno;peak|
AARS2_1	6:44261373:T:C:AARS2:rs78340719	-4.70693	0.010647	0.0380467	anno;
AARS2_1	6:44261984:A:G:AARS2:rs145397974	-4.70628	0.0106139	0.0379285	anno;
AARS2_1	6:44255387:T:C:AARS2:rs61742784	-4.7052	0.0105591	0.0377328	anno;Exon|
AARS2_1	6:44254924:A:T:AARS2:rs77867000	-4.70468	0.010533	0.0376398	anno;
AARS2_1	6:44251826:A:G:AARS2:rs76198198	-4.70074	0.0103359	0.0369357	anno;peak|
AARS2_1	6:44265918:G:C:AARS2:rs79254974	-4.69933	0.0297547	0.0366875	anno;Promoter|
AARS2_1	6:44272324:A:C:AARS2:rs74964556	-4.69789	0.0295514	0.036437	anno;
AARS2_1	6:44272284:C:G:AARS2:rs74950428	-4.69771	0.0295252	0.0364046	anno;
AARS2_1	6:44243463:A:G:AARS2:rs3734709	-4.575	0.00829114	0.0293166	anno;Exon|peak|
AARS2_1	6:44243117:A:G:AARS2:rs3734708	-4.55945	0.00707872	0.0250902	anno;peak|
AARS2_1	6:44241651:A:G:AARS2:rs80118001	-4.59958	0.00659459	0.0235465	anno;Promoter|peak|
AARS2_1	6:44242789:G:A:AARS2:rs190669824	-4.52825	0.00665211	0.0235222	anno;peak|
AARS2_1	6:44282283:G:A:AARS2:rs6458377	-4.44699	0.00202589	0.00730237	anno;
AARS_1	16:70315911:T:C:AARS:rs775208	-6.38398	0.155078	0.268234	anno;
AARS_1	16:70297568:C:T:AARS:rs73575193	-6.1693	0.17534	0.100922	anno;peak|
AARS_1	16:70285901:A:G:AARS:rs4985407	-6.12291	0.0987941	0.0585001	anno;Promoter|peak|
AARS_1	16:70382179:C:T:AARS:rs7192268	-6.11266	0.0331347	0.0568093	anno;3_UTR|
AARS_1	16:70303580:G:A:AARS:rs2070203	-6.09882	0.0825236	0.0494255	anno;Exon|peak|
AARS_1	16:70397203:G:A:AARS:rs12102803	-6.06757	0.0257265	0.043998	anno;
AARS_1	16:70393756:G:A:AARS:rs7189474	-6.06197	0.0247708	0.0423539	anno;
AARS_1	16:70408329:T:G:AARS:rs3859068	-6.05952	0.0246622	0.042164	anno;
AARS_1	16:70409844:T:C:AARS:rs9927553	-6.0588	0.0711013	0.0418845	anno;
AARS_1	16:70411111:C:G:AARS:rs72790691	-6.05731	0.0243632	0.0415575	anno;
AARS_1	16:70400857:A:G:AARS:rs8058224	-6.06001	0.0239524	0.0406164	anno;
AARS_1	16:70442408:C:T:AARS:rs936994	-6.04531	0.0656627	0.0379446	anno;
AARS_1	16:70231428:T:C:AARS:rs2549638	-5.92938	0.0186621	0.0323275	anno;
AARS_1	16:70439105:C:T:AARS:rs9934440	-5.98386	0.0172493	0.0285164	anno;
AARS_1	16:70440559:C:G:AARS:rs9939726	-5.98305	0.0166706	0.0278822	anno;peak|
AARS_1	16:70241566:G:A:AARS:rs9924898	-5.91727	0.0106246	0.0183443	anno;
AARS_1	16:70235983:T:C:AARS:rs3874602	-5.93553	0.0104872	0.0178364	anno;
AARS_1	16:70227366:C:T:AARS:rs656267	-5.83693	0.0820741	0.0152166	anno;
AASS_1	7:121725961:G:A:AASS:rs3213699	-7.03998	0.303384	0.406334	anno;
AASS_1	7:121743463:T:C:AASS:rs28764931	-7.03107	0.285335	0.383475	anno;
AASS_1	7:121774968:A:C:AASS:rs10246405	-6.77882	0.0518904	0.0873122	anno;
AASS_1	7:121718597:T:C:AASS:rs565043855	-6.72006	0.0351995	0.0665546	anno;
AASS_1	7:121729494:C:T:AASS:rs2268075	-6.61452	0.017679	0.0440556	anno;
AASS_1	7:121730897:A:C:AASS:rs2016284	-6.61414	0.0511151	0.0440005	anno;
AASS_1	7:121731324:G:A:AASS:rs12113314	-6.61392	0.0176105	0.0439693	anno;peak|
AASS_1	7:121755802:G:T:AASS:rs17144099	-6.56159	0.0364256	0.0375974	anno;CRE|DAR|peak|
ABCA10_2	17:67172988:A:G:ABCA10:rs112350463	-4.65849	0.0261694	0.0481944	anno;
ABCA10_1	17:67119593:G:C:ABCA10:rs4603621	6.08139	0.0134271	0.0421647	anno;
ABCA10_1	17:67125840:C:T:ABCA10:rs4968839	6.00249	0.00902537	0.0283391	anno;Exon|
ABCA10_1	17:67119725:T:C:ABCA10:rs4334355	6.00249	0.00885089	0.0277738	anno;
ABCA10_1	17:67120025:A:G:ABCA10:rs4968838	6.00249	0.00885089	0.0277738	anno;
ABCA10_1	17:67121939:A:G:ABCA10:rs7208586	6.00249	0.00885089	0.0277738	anno;
ABCA10_1	17:67122603:T:C:ABCA10:rs12952117	6.00249	0.00885089	0.0277738	anno;
ABCA10_1	17:67123160:C:T:ABCA10:rs7213831	6.00249	0.00862044	0.0267775	anno;
ABCA10_1	17:67123911:T:C:ABCA10:rs8079981	5.98578	0.00785315	0.0243873	anno;
ABCA10_1	17:67106226:A:G:ABCA10:rs9303012	5.94524	0.0078912	0.0243742	anno;
ABCA10_1	17:67138563:T:A:ABCA10:rs9916693	5.97365	0.0075176	0.0233557	anno;Promoter|
ABCA10_2	17:67191821:T:C:ABCA10:rs116757386	-4.30131	0.0102805	0.019527	anno;
ABCA10_2	17:67168604:G:T:ABCA10:rs75806516	-4.29661	0.00872091	0.0165643	anno;
ABCA10_2	17:67184909:A:G:ABCA10:rs12602007	-4.29661	0.00872091	0.0165643	anno;
ABCA10_2	17:67188384:G:T:ABCA10:rs36145749	-4.29661	0.00872091	0.0165643	anno;
ABCA10_2	17:67188565:G:A:ABCA10:rs12602962	-4.29661	0.00872091	0.0165643	anno;
ABCA10_2	17:67192911:G:C:ABCA10:rs112789642	-4.29661	0.00872091	0.0165643	anno;
ABCA10_2	17:67193881:C:G:ABCA10:rs12604047	-4.29661	0.00872091	0.0165643	anno;
ABCA10_2	17:67196471:A:G:ABCA10:rs76490884	-4.29661	0.00872091	0.0165643	anno;
ABCA10_2	17:67198974:T:A:ABCA10:rs3891333	-4.29661	0.00872091	0.0165643	anno;
ABCA10_2	17:67199050:C:T:ABCA10:rs764178	-4.29661	0.00872091	0.0165643	anno;
ABCA10_2	17:67188545:C:G:ABCA10:rs8068468	-4.29649	0.00871778	0.0165583	anno;
ABCA10_2	17:67115765:C:T:ABCA10:rs8080508	-4.27588	0.00818686	0.0155398	anno;
ABCA10_2	17:67115882:C:T:ABCA10:rs8065842	-4.27566	0.0081816	0.0155297	anno;
ABCA10_2	17:67176462:G:A:ABCA10:rs57736258	-4.29569	0.00818993	0.0154963	anno;
ABCA10_2	17:67115077:T:A:ABCA10:rs9909265	-4.27335	0.0235476	0.0154197	anno;peak|
ABCA10_2	17:67117428:G:A:ABCA10:rs8067965	-4.27267	0.00810766	0.0153879	anno;
ABCA10_2	17:67155160:A:C:ABCA10:rs74548282	-4.29661	0.00754565	0.0143556	anno;
ABCA10_2	17:67164941:G:A:ABCA10:rs4968786	-4.29661	0.00754565	0.0143556	anno;
ABCA10_2	17:67165160:G:T:ABCA10:rs77719853	-4.29661	0.00754565	0.0143556	anno;
ABCA10_2	17:67167957:T:C:ABCA10:rs58761646	-4.29661	0.00754565	0.0143556	anno;
ABCA10_2	17:67173574:C:T:ABCA10:rs76672942	-4.29661	0.00754565	0.0143556	anno;
ABCA10_2	17:67179639:A:G:ABCA10:rs79466258	-4.29661	0.00754565	0.0143556	anno;
ABCA10_2	17:67179697:C:G:ABCA10:rs7501929	-4.29661	0.00754565	0.0143556	anno;
ABCA10_2	17:67180739:A:G:ABCA10:rs9905622	-4.29661	0.00754565	0.0143556	anno;
ABCA10_2	17:67181325:T:C:ABCA10:rs1968099	-4.29661	0.00754565	0.0143556	anno;
ABCA10_2	17:67186755:G:C:ABCA10:rs12602816	-4.29661	0.00754565	0.0143556	anno;
ABCA10_2	17:67187166:A:G:ABCA10:rs16973722	-4.29661	0.00754565	0.0143556	anno;
ABCA10_2	17:67190930:G:T:ABCA10:rs77650613	-4.29661	0.00754565	0.0143556	anno;
ABCA10_2	17:67191149:C:A:ABCA10:rs41496448	-4.29661	0.00754565	0.0143556	anno;
ABCA10_2	17:67191474:A:G:ABCA10:rs74611413	-4.29661	0.00754565	0.0143556	anno;
ABCA10_2	17:67192036:A:C:ABCA10:rs147222331	-4.29661	0.0218707	0.0143556	anno;
ABCA10_2	17:67192252:G:C:ABCA10:rs188079369	-4.29661	0.00754565	0.0143556	anno;
ABCA10_2	17:67192359:A:G:ABCA10:rs144496313	-4.29661	0.00754565	0.0143556	anno;
ABCA10_2	17:67193014:T:C:ABCA10:rs113464685	-4.29661	0.00754565	0.0143556	anno;
ABCA10_2	17:67195813:A:C:ABCA10:rs35991088	-4.29661	0.00754565	0.0143556	anno;
ABCA10_2	17:67195935:A:G:ABCA10:rs4968853	-4.29661	0.00754565	0.0143556	anno;
ABCA10_2	17:67197278:C:T:ABCA10:rs80064693	-4.29661	0.00754565	0.0143556	anno;
ABCA10_2	17:67198091:T:C:ABCA10:rs55821831	-4.29661	0.00754565	0.0143556	anno;
ABCA10_2	17:67205333:G:A:ABCA10:rs4968787	-4.29661	0.00754565	0.0143556	anno;
ABCA10_2	17:67209871:A:G:ABCA10:rs76605871	-4.29661	0.130405	0.0143556	anno;Exon|
ABCA10_2	17:67153374:C:G:ABCA10:rs12103556	-4.29596	0.00753077	0.014327	anno;
ABCA10_1	17:67112456:C:G:ABCA10:rs5025273	5.67775	0.00458516	0.0143169	anno;
ABCA10_2	17:67215088:T:C:ABCA10:rs16973774	-4.29542	0.00751853	0.0143035	anno;
ABCA10_2	17:67213596:G:A:ABCA10:rs74936601	-4.29533	0.00751651	0.0142996	anno;
ABCA10_2	17:67118617:A:G:ABCA10:rs8081118	-4.24757	0.00751491	0.0142517	anno;
ABCA10_2	17:67108362:G:C:ABCA10:rs9282553	-4.21266	0.00755684	0.0141365	anno;Exon|
ABCA10_2	17:67108577:C:T:ABCA10:rs9889289	-4.21266	0.00755684	0.0141365	anno;
ABCA10_2	17:67108882:C:T:ABCA10:rs736528	-4.21266	0.00755684	0.0141365	anno;
ABCA10_2	17:67110367:C:T:ABCA10:rs9904389	-4.21187	0.00753882	0.0141024	anno;
ABCA10_1	17:67096691:T:C:ABCA10:rs7214079	5.83115	0.00455427	0.0140335	anno;Promoter|
ABCA10_1	17:67164420:A:G:ABCA10:rs4968785	5.87769	0.0044359	0.0138882	anno;
ABCA10_1	17:67096153:T:C:ABCA10:rs16973567	5.82586	0.0044375	0.0136661	anno;Promoter|
ABCA10_2	17:67115758:T:C:ABCA10:rs76518566	-4.27588	0.00708992	0.0134796	anno;
ABCA10_2	17:67117526:G:A:ABCA10:rs12602766	-4.27246	0.00701774	0.0133409	anno;
ABCA10_1	17:67216773:T:C:ABCA10:rs1158495	5.88039	0.0041691	0.0131201	anno;
ABCA10_1	17:67214805:T:C:ABCA10:rs7216899	5.87934	0.00414701	0.0130503	anno;
ABCA10_1	17:67208644:T:C:ABCA10:rs2108738	5.87922	0.00414445	0.0130423	anno;
ABCA10_1	17:67199646:C:T:ABCA10:rs8081003	5.87922	0.0119517	0.0129754	anno;peak|
ABCA10_1	17:67211118:T:C:ABCA10:rs9909083	5.87922	0.11881	0.0129754	anno;Promoter|
ABCA10_1	17:67211399:C:T:ABCA10:rs9902996	5.87922	0.11881	0.0129754	anno;Promoter|
ABCA10_1	17:67178954:C:T:ABCA10:rs4968851	5.87814	0.00410146	0.0129042	anno;
ABCA10_1	17:67217796:C:G:ABCA10:rs10775359	5.8822	0.00407408	0.012696	anno;
ABCA10_1	17:67217727:T:C:ABCA10:rs10775358	5.8811	0.00405139	0.0126251	anno;
ABCA10_1	17:67180920:T:C:ABCA10:rs9892172	5.87418	0.00400266	0.0125871	anno;
ABCA10_1	17:67217433:T:C:ABCA10:rs11656539	5.88022	0.00403354	0.0125693	anno;
ABCA10_1	17:67181333:G:A:ABCA10:rs1968100	5.87387	0.00399641	0.0125674	anno;
ABCA10_1	17:67209463:A:C:ABCA10:rs9916084	5.87922	0.00401307	0.0125053	anno;
ABCA10_1	17:67209553:T:C:ABCA10:rs9894689	5.87922	0.00401307	0.0125053	anno;
ABCA10_1	17:67195117:G:C:ABCA10:rs7210259	5.87961	0.0115986	0.0124696	anno;
ABCA10_1	17:67195583:C:G:ABCA10:rs9899837	5.87954	0.00400076	0.0124652	anno;
ABCA10_1	17:67196352:A:G:ABCA10:rs7217887	5.87944	0.0039987	0.0124588	anno;
ABCA10_1	17:67200801:A:G:ABCA10:rs9898868	5.87922	0.00399426	0.0124449	anno;
ABCA10_1	17:67201008:A:G:ABCA10:rs9904672	5.87922	0.00399426	0.0124449	anno;
ABCA10_1	17:67207846:T:A:ABCA10:rs2364993	5.87922	0.00399426	0.0124449	anno;
ABCA10_1	17:67210267:A:C:ABCA10:rs8066449	5.87922	0.115072	0.0124449	anno;Promoter|
ABCA10_1	17:67169500:C:T:ABCA10:rs8080863	5.87851	0.00398004	0.0124004	anno;
ABCA10_1	17:67170736:A:G:ABCA10:rs740520	5.87851	0.00398004	0.0124004	anno;
ABCA10_2	17:67127922:G:A:ABCA10:rs78078634	-4.24697	0.00650446	0.012355	anno;
ABCA10_1	17:67163667:C:T:ABCA10:rs8077551	5.87753	0.00396036	0.0123389	anno;
ABCA10_1	17:67191448:T:G:ABCA10:rs9902643	5.87768	0.00394691	0.0122925	anno;
ABCA10_2	17:67109833:A:T:ABCA10:rs9282554	-4.21266	0.00654248	0.0122603	anno;Exon|
ABCA10_2	17:67109997:G:A:ABCA10:rs9282555	-4.21247	0.00653865	0.0122531	anno;
ABCA10_1	17:67159082:G:A:ABCA10:rs4577157	5.87585	0.0039267	0.0122337	anno;
ABCA10_2	17:67110622:C:G:ABCA10:rs4968837	-4.21147	0.0065194	0.0122167	anno;
ABCA10_1	17:67212768:C:T:ABCA10:rs9911770	5.8662	0.00388029	0.0122083	anno;
ABCA10_1	17:67166948:C:A:ABCA10:rs1558166	5.8761	0.00391568	0.0121949	anno;peak|
ABCA10_1	17:67213524:C:T:ABCA10:rs9891283	5.87779	0.00381788	0.0119726	anno;
ABCA10_1	17:67183676:C:G:ABCA10:rs12953127	5.86321	0.00380316	0.0119623	anno;
ABCA10_1	17:67144197:G:A:ABCA10:rs4968843	5.86074	0.0639541	0.0115463	anno;3_UTR|
ABCA10_1	17:67144628:C:A:ABCA10:rs1974576	5.86158	0.0630799	0.011381	anno;3_UTR|
ABCA10_1	17:67144684:T:A:ABCA10:rs1974577	5.86118	0.0629529	0.011358	anno;3_UTR|
ABCA10_1	17:67184196:G:A:ABCA10:rs8074654	5.86087	0.00364083	0.01134	anno;
ABCA10_1	17:67147580:C:T:ABCA10:rs740518	5.85094	0.102999	0.0112419	anno;Promoter|
ABCA10_1	17:67178316:A:G:ABCA10:rs4968849	5.85466	0.0620274	0.0111973	anno;Exon|
ABCA10_1	17:67212574:A:C:ABCA10:rs9912127	5.84961	0.00347959	0.010929	anno;
ABCA10_2	17:67105504:A:G:ABCA10:rs58452744	-4.17055	0.00577775	0.0108146	anno;
ABCA10_1	17:67149013:G:A:ABCA10:rs2364986	5.84588	0.00342554	0.0107617	anno;
ABCA10_2	17:67199133:C:T:ABCA10:rs4331393	-4.16294	0.00585298	0.0107054	anno;
ABCA10_2	17:67125337:T:C:ABCA10:rs16973622	-4.15563	0.00572892	0.0104769	anno;
ABCA10_1	17:67138138:C:T:ABCA10:rs3744489	5.85638	0.0033769	0.0103831	anno;Promoter|peak|
ABCA10_1	17:67118522:T:C:ABCA10:rs6501183	5.81169	0.00328942	0.0101749	anno;
ABCA10_1	17:67118787:A:G:ABCA10:rs8064595	5.81169	0.00328942	0.0101749	anno;
ABCA10_1	17:67134928:C:T:ABCA10:rs7211358	5.84788	0.00329478	0.0101385	anno;
ABCA10_2	17:67136005:A:G:ABCA10:rs145528226	-4.17948	0.00533447	0.0101109	anno;
ABCA10_2	17:67139474:T:G:ABCA10:rs73356149	-4.12684	0.00525817	0.00993459	anno;
ABCA10_1	17:67137247:G:T:ABCA10:rs8078314	5.84286	0.00321367	0.00988624	anno;Promoter|
ABCA10_1	17:67136143:G:A:ABCA10:rs12601388	5.84161	0.00319374	0.00982425	anno;
ABCA10_1	17:67159432:C:G:ABCA10:rs981452	5.80722	0.00310935	0.00972166	anno;
ABCA10_1	17:67133021:G:A:ABCA10:rs2041170	5.83802	0.00313748	0.00964926	anno;
ABCA10_1	17:67127173:A:G:ABCA10:rs12940298	5.83398	0.00307538	0.00945611	anno;
ABCA10_1	17:67135643:A:C:ABCA10:rs8070292	5.84108	0.00309447	0.00942492	anno;
ABCA10_1	17:67126564:T:C:ABCA10:rs11652530	5.83304	0.00306119	0.00941197	anno;
ABCA10_1	17:67138878:C:A:ABCA10:rs12453914	5.82355	0.00300143	0.00938907	anno;Promoter|
ABCA10_1	17:67133352:T:G:ABCA10:rs2041171	5.83841	0.00305389	0.00929996	anno;
ABCA10_1	17:67132699:T:G:ABCA10:rs2190900	5.83775	0.00304391	0.0092692	anno;
ABCA10_1	17:67132022:T:C:ABCA10:rs7219200	5.83741	0.00303881	0.00925349	anno;3_UTR|
ABCA10_1	17:67129129:G:T:ABCA10:rs12939282	5.83545	0.00300946	0.0091631	anno;
ABCA10_2	17:67144395:G:A:ABCA10:rs2233767	-4.09915	0.0838833	0.00916273	anno;3_UTR|
ABCA10_2	17:67158994:G:A:ABCA10:rs185830070	-4.13073	0.00473085	0.0090157	anno;
ABCA10_2	17:67140211:A:G:ABCA10:rs77008409	-4.12136	0.00451191	0.00853618	anno;
ABCA10_1	17:67152734:G:A:ABCA10:rs2215148	5.7897	0.00263343	0.0082676	anno;
ABCA10_2	17:67143765:T:G:ABCA10:rs74935944	-4.10238	0.00427458	0.00808236	anno;peak|
ABCA10_2	17:67144576:T:C:ABCA10:rs2233768	-4.09879	0.0731246	0.00799949	anno;3_UTR|
ABCA10_2	17:67145241:A:G:ABCA10:rs75706760	-4.09763	0.00421732	0.00797292	anno;
ABCA10_2	17:67103111:A:T:ABCA10:rs11077946	-3.9127	0.00461606	0.00793152	anno;
ABCA12_1	2:215787725:A:G:ABCA12:rs34206771	4.34304	0.119408	0.985425	anno;
ABCA12_3	2:215813331:T:C:ABCA12:rs726070	4.16124	0.900104	0.960855	anno;Exon|
ABCA12_2	2:216321788:G:C:ABCA12:rs1250221	-3.99806	0.341887	0.358339	anno;
ABCA12_2	2:216321971:T:C:ABCA12:rs1250222	-3.995	0.338086	0.35451	anno;
ABCA12_2	2:216322388:T:C:ABCA12:rs1250223	-3.9561	0.293471	0.309526	anno;
ABCA17P_1	16:2544361:T:C:ABCA17P:rs113480613	4.22553	0.626986	0.626986	anno;
ABCA17P_1	16:2553869:T:A:ABCA17P:rs4786287	4.09309	0.373014	0.373014	anno;3_UTR|
ABCA1_2	9:108653654:C:T:ABCA1:rs73506383	-4.33716	0.407729	0.753854	anno;
ABCA1_2	9:108610067:A:G:ABCA1:rs7036204	-4.23484	0.418821	0.233291	anno;
ABCA1_1	9:107690057:A:C:ABCA1:rs2437817	-5.69759	0.421367	0.219467	anno;Promoter|DAR|peak|
ABCA1_1	9:107690124:G:A:ABCA1:rs2243312	-5.68977	0.404584	0.211958	anno;Promoter|DAR|peak|
ABCA1_1	9:107690450:A:G:ABCA1:rs1800977	-5.49429	0.136049	0.0842122	anno;Promoter|DAR|peak|
ABCA1_1	9:107688059:A:G:ABCA1:rs2515609	-5.12468	0.00106999	0.0407488	anno;peak|
ABCA1_1	9:107687906:T:G:ABCA1:rs2515610	-5.17867	0.00114219	0.0373371	anno;peak|
ABCA1_1	9:107687711:T:C:ABCA1:rs2472506	-5.17304	0.00111826	0.0365091	anno;
ABCA1_1	9:107690733:A:G:ABCA1:rs2246298	-5.23783	0.0357303	0.0359396	anno;Promoter|DAR|peak|
ABCA1_1	9:107687496:A:G:ABCA1:rs2515611	-5.16594	0.00108891	0.0354913	anno;peak|
ABCA1_1	9:107687193:C:A:ABCA1:rs2472507	-5.15395	0.00104151	0.0338424	anno;peak|
ABCA1_1	9:107686752:A:G:ABCA1:rs2515612	-5.13465	0.000970501	0.0313594	anno;
ABCA1_1	9:107686241:C:T:ABCA1:rs2437821	-5.12018	0.000921232	0.0296271	anno;
ABCA1_1	9:107686292:T:C:ABCA1:rs2487051	-5.119	0.00091737	0.0294909	anno;
ABCA1_1	9:107685577:A:C:ABCA1:rs2487050	-5.10121	0.000868353	0.0277917	anno;
ABCA1_1	9:107686405:T:C:ABCA1:rs2487052	-5.10028	0.000858558	0.0274115	anno;
ABCA1_1	9:107687425:T:C:ABCA1:rs2487053	-5.1401	0.000971219	0.0254648	anno;peak|
ABCA1_1	9:107689710:G:C:ABCA1:rs2472373	-4.85166	0.0131404	0.0106139	anno;Promoter|DAR|peak|
ABCA1_1	9:107743579:G:T:ABCA1:rs13289668	-4.5712	0.000796542	0.00802344	anno;
ABCA1_1	9:107716170:A:G:ABCA1:rs2472518	-4.6428	0.00114548	0.00797937	anno;
ABCA1_1	9:107712209:T:C:ABCA1:rs2472451	-4.62411	0.000380856	0.00755291	anno;
ABCA1_1	9:107691934:G:C:ABCA1:rs2487047	-4.70892	0.00518909	0.00594452	anno;Exon|
ABCA1_1	9:107717481:T:C:ABCA1:rs1890884	-4.58617	0.000312166	0.00512763	anno;
ABCA1_1	9:107719444:G:A:ABCA1:rs2487029	-4.58883	0.000329603	0.00498203	anno;
ABCA1_1	9:107692827:T:C:ABCA1:rs2487044	-4.67235	0.000281849	0.00490932	anno;
ABCA1_1	9:107693298:A:G:ABCA1:rs2437813	-4.66445	0.000278013	0.00479224	anno;
ABCA1_1	9:107716910:T:C:ABCA1:rs2472515	-4.58141	0.000306115	0.00462157	anno;
ABCA1_1	9:107693935:A:G:ABCA1:rs2487043	-4.64265	0.000272958	0.00452419	anno;
ABCA1_1	9:107694198:A:T:ABCA1:rs2994376	-4.63334	0.000268801	0.00439974	anno;
ABCA1_1	9:107694522:T:C:ABCA1:rs2487042	-4.62099	0.000263481	0.00424105	anno;
ABCA1_1	9:107694780:C:T:ABCA1:rs2472500	-4.60977	0.00025883	0.00410291	anno;
ABCA4_3	1:95120228:C:T:ABCA4:rs11165191	-3.91209	0.968058	0.996367	anno;
ABCA4_1	1:94577423:T:C:ABCA4:rs1889404	-5.42958	0.611416	0.647864	anno;CRE|DAR|peak|
ABCA4_2	1:94514957:A:G:ABCA4:rs484110	4.28137	0.185911	0.426848	anno;
ABCA4_1	1:94577410:T:C:ABCA4:rs1889405	-5.2969	0.384513	0.414593	anno;CRE|DAR|peak|
ABCA4_2	1:94520080:A:G:ABCA4:rs566927	4.31061	0.172192	0.398272	anno;
ABCA4_2	1:94516985:A:C:ABCA4:rs1191231	-4.11178	0.0949612	0.252364	anno;
ABCA4_2	1:94511717:C:G:ABCA4:rs3789399	4.06536	0.20387	0.210438	anno;
ABCA4_1	1:94575440:A:G:ABCA4:rs3789433	-4.89485	0.0465499	0.168672	anno;CRE|peak|
ABCA4_2	1:94531324:C:T:ABCA4:rs3789405	-4.46168	0.0442706	0.159681	anno;peak|
ABCA4_2	1:94530163:A:C:ABCA4:rs6661519	-4.44064	0.346131	0.158015	anno;CRE|DAR|peak|
ABCA4_2	1:94529743:G:A:ABCA4:rs4847273	-4.43698	0.345072	0.15776	anno;
ABCA4_2	1:94530518:C:T:ABCA4:rs1007347	-4.4174	0.345284	0.157667	anno;CRE|peak|
ABCA4_2	1:94530337:G:A:ABCA4:rs1007348	-4.41252	0.342252	0.157201	anno;
ABCA4_2	1:94531439:A:G:ABCA4:rs3789406	-4.39417	0.0415466	0.155055	anno;peak|
ABCA5_2	17:66683179:C:T:ABCA5:rs4491596	4.13043	0.325289	0.350536	anno;
ABCA5_2	17:66681582:A:G:ABCA5:rs35186465	4.08421	0.274429	0.296904	anno;
ABCA5_2	17:66678300:A:G:ABCA5:rs8070086	4.08684	0.180234	0.191336	anno;
ABCA5_2	17:66675720:C:T:ABCA5:rs11868207	4.08158	0.176443	0.173779	anno;
ABCA5_1	17:67294456:G:A:ABCA5:rs201595032	-4.12905	0.0205673	0.125605	anno;
ABCA5_1	17:67294457:A:G:ABCA5:rs199502367	-4.12905	0.0205673	0.125605	anno;
ABCA5_1	17:67220060:T:G:ABCA5:rs1468513	-4.36892	0.0601968	0.0846447	anno;CRE|DAR|peak|
ABCA5_1	17:67321498:C:G:ABCA5:rs10512527	-4.36766	0.0229023	0.0816057	anno;peak|
ABCA5_1	17:67301970:T:C:ABCA5:rs488714	-4.28812	0.0159124	0.0652076	anno;
ABCA5_1	17:67298422:G:C:ABCA5:rs494946	-4.2477	0.417861	0.0630432	anno;Promoter|
ABCA5_1	17:67272778:T:C:ABCA5:rs523505	-4.23098	0.0140853	0.061381	anno;
ABCA5_1	17:67270493:A:G:ABCA5:rs817127	-4.2272	0.0135061	0.0598144	anno;
ABCA5_1	17:67296411:G:C:ABCA5:rs476677	-4.22562	0.0134273	0.0595736	anno;
ABCA5_1	17:67293580:G:C:ABCA5:rs568536	-4.24684	0.0136429	0.0586543	anno;
ABCA5_1	17:67292975:A:G:ABCA5:rs481876	-4.24191	0.013396	0.0579249	anno;
ABCA5_1	17:67285635:A:G:ABCA5:rs486840	-4.22204	0.0124495	0.0550951	anno;
ABCA5_1	17:67290644:A:C:ABCA5:rs2441358	-4.22172	0.0124347	0.0550504	anno;
ABCA5_1	17:67286723:G:A:ABCA5:rs544940	-4.20194	0.0119189	0.0533191	anno;
ABCA5_1	17:67319862:A:T:ABCA5:rs7213377	-4.23498	0.0126675	0.0528217	anno;
ABCA5_1	17:67318946:T:C:ABCA5:rs12949267	-4.22642	0.0122751	0.0517206	anno;
ABCA5_1	17:67255386:A:G:ABCA5:rs7223895	-4.16522	0.0107599	0.0511891	anno;
ABCA5_1	17:67264339:G:A:ABCA5:rs817126	-4.15154	0.293192	0.0490568	anno;Promoter|
ABCA8_1	17:66968082:G:C:ABCA8:rs764426	5.4584	0.152646	0.0598273	anno;peak|
ABCA8_1	17:66933003:T:C:ABCA8:rs4147967	5.37148	0.0103577	0.0380277	anno;
ABCA8_1	17:66961258:T:A:ABCA8:rs577775168	5.36656	0.0100976	0.037073	anno;
ABCA8_1	17:66961259:G:A:ABCA8:rs202012861	5.36656	0.0100976	0.037073	anno;
ABCA8_1	17:66917234:T:C:ABCA8:rs8077155	5.30087	0.00720637	0.0264594	anno;
ABCA8_1	17:66967893:G:A:ABCA8:rs1344055	5.29264	0.0647252	0.0253717	anno;peak|
ABCA8_1	17:66966274:A:G:ABCA8:rs6501919	5.28518	0.00665228	0.0244253	anno;
ABCA8_1	17:66967865:T:C:ABCA8:rs764425	5.28437	0.0620545	0.024325	anno;peak|
ABCA8_1	17:66966487:C:T:ABCA8:rs2364310	5.27149	0.00620538	0.0227847	anno;
ABCA8_1	17:66967483:T:C:ABCA8:rs7221169	5.26359	0.0558402	0.0218894	anno;
ABCA8_1	17:66966982:A:C:ABCA8:rs1122265	5.26304	0.00594501	0.0218288	anno;
ABCA8_1	17:66967598:G:A:ABCA8:rs6501920	5.25127	0.0524647	0.0205664	anno;
ABCA8_1	17:66960822:A:C:ABCA8:rs12945526	5.20952	0.004539	0.016667	anno;
ABCA8_1	17:66960839:G:T:ABCA8:rs12940203	5.20944	0.00453701	0.0166597	anno;
ABCA8_1	17:66960843:C:T:ABCA8:rs12940209	5.20944	0.00453701	0.0166597	anno;
ABCA8_1	17:66962636:C:T:ABCA8:rs7225771	5.19186	0.00415462	0.0152558	anno;
ABCA8_1	17:66920268:A:G:ABCA8:rs6501870	5.18627	0.00404036	0.0148363	anno;
ABCA8_1	17:66963001:A:T:ABCA8:rs7210891	5.18488	0.00401225	0.0147331	anno;
ABCA8_1	17:66963134:G:C:ABCA8:rs10852773	5.17859	0.00388831	0.0142781	anno;
ABCA8_1	17:66963301:T:C:ABCA8:rs9905330	5.17725	0.00386255	0.0141835	anno;
ABCA8_1	17:66953909:T:C:ABCA8:rs11868372	5.17529	0.00382499	0.0140456	anno;
ABCA8_1	17:66954003:C:T:ABCA8:rs11869992	5.17525	0.00382412	0.0140424	anno;
ABCA8_1	17:66956958:G:A:ABCA8:rs12944603	5.17519	0.00382309	0.0140386	anno;
ABCA8_1	17:66957033:A:T:ABCA8:rs4968979	5.17519	0.00382309	0.0140386	anno;
ABCA8_1	17:66957351:A:G:ABCA8:rs4968980	5.17497	0.0110686	0.0140229	anno;peak|
ABCA8_1	17:66962303:A:T:ABCA8:rs6501916	5.1748	0.00381565	0.0140113	anno;
ABCA8_1	17:66963284:C:G:ABCA8:rs10852774	5.17334	0.00378788	0.0139094	anno;
ABCA8_1	17:66955765:A:G:ABCA8:rs8065455	5.17267	0.00377533	0.0138633	anno;
ABCA8_1	17:66962851:G:A:ABCA8:rs7225239	5.17223	0.00376711	0.0138331	anno;
ABCA8_1	17:66962854:A:C:ABCA8:rs7217589	5.17217	0.00376593	0.0138288	anno;
ABCA8_1	17:66964682:C:T:ABCA8:rs2159433	5.17109	0.00374568	0.0137544	anno;
ABCA8_1	17:66963513:A:G:ABCA8:rs10852776	5.16948	0.00371591	0.0136451	anno;
ABCA8_1	17:66963627:A:G:ABCA8:rs11077852	5.16776	0.00368415	0.0135285	anno;
ABCA8_1	17:66958538:G:A:ABCA8:rs12938677	5.16674	0.00366543	0.0134598	anno;
ABCA8_1	17:66922993:A:C:ABCA8:rs6501873	5.16564	0.00364558	0.0133869	anno;peak|
ABCA8_1	17:66963868:T:G:ABCA8:rs7207730	5.16347	0.00360635	0.0132429	anno;
ABCA8_1	17:66964599:A:G:ABCA8:rs1121077	5.16332	0.00360366	0.013233	anno;
ABCA8_1	17:66923711:C:T:ABCA8:rs7212686	5.14504	0.00329121	0.0120858	anno;
ABCA8_1	17:66938232:A:G:ABCA8:rs4147958	5.13659	0.00315631	0.0115905	anno;peak|
ABCA8_1	17:66920355:T:C:ABCA8:rs6501871	5.13506	0.00313259	0.0115034	anno;
ABCA8_1	17:66952622:T:C:ABCA8:rs9916792	5.11286	0.00280758	0.0103101	anno;
ABCA8_1	17:66917068:G:A:ABCA8:rs9896352	5.11148	0.00278856	0.0102403	anno;
ABCA8_1	17:66916904:G:T:ABCA8:rs8068633	5.0992	0.0026252	0.00964053	anno;
ABCA8_1	17:66953629:G:C:ABCA8:rs9897075	5.09906	0.00262342	0.00963399	anno;
ABCA8_1	17:66912101:A:C:ABCA8:rs1838102	5.09288	0.00254498	0.00934596	anno;
ABCA8_1	17:66950499:A:G:ABCA8:rs4147947	5.08736	0.0071796	0.00909657	anno;
ABCA8_1	17:66951984:G:A:ABCA8:rs58680324	5.07153	0.0661676	0.00841883	anno;Promoter|
ABCA8_1	17:66950627:T:A:ABCA8:rs4147946	5.07099	0.0659943	0.00839678	anno;Promoter|
ABCA8_1	17:66950686:C:T:ABCA8:rs2041321	5.07099	0.0659943	0.00839678	anno;Promoter|
ABCA8_1	17:66951094:C:T:ABCA8:rs4147945	5.07099	0.0659943	0.00839678	anno;Promoter|
ABCA8_1	17:66951156:C:T:ABCA8:rs4147944	5.07099	0.0659943	0.00839678	anno;Promoter|
ABCA8_1	17:66950182:C:G:ABCA8:rs59830399	5.0689	0.00656003	0.0083117	anno;
ABCA8_1	17:66950098:T:C:ABCA8:rs4147949	5.06832	0.00654155	0.00828829	anno;
ABCA8_1	17:66925116:G:A:ABCA8:rs4147980	5.06636	0.00223541	0.00820933	anno;
ABCA8_1	17:66924555:G:A:ABCA8:rs767690	5.05931	0.0202306	0.00793178	anno;
ABCA8_1	17:66950453:A:G:ABCA8:rs4147948	5.05156	0.0060286	0.00763848	anno;
ABCA8_1	17:66949823:G:A:ABCA8:rs4147950	5.01586	0.00507069	0.00642495	anno;peak|
ABCA8_1	17:66926678:G:A:ABCA8:rs4147973	5.00127	0.00163056	0.00598839	anno;
ABCA8_1	17:66926621:C:A:ABCA8:rs4147974	4.94331	0.00123544	0.00453747	anno;
ABCA8_1	17:66947954:A:G:ABCA8:rs8068037	4.90237	0.00101752	0.00373723	anno;
ABCA8_1	17:66925910:T:C:ABCA8:rs4147977	4.8656	0.000855916	0.00314378	anno;
ABCA8_1	17:66948955:C:T:ABCA8:rs1990334	4.8581	0.000826382	0.00303532	anno;
ABCA8_1	17:66948508:C:T:ABCA8:rs8079972	4.85561	0.000816835	0.00300026	anno;
ABCA8_1	17:66948096:T:C:ABCA8:rs8072891	4.85548	0.000816318	0.00299836	anno;
ABCA8_1	17:66946028:G:A:ABCA8:rs7225473	4.83985	0.000758896	0.00278748	anno;
ABCA8_1	17:66946424:T:G:ABCA8:rs4968827	4.83651	0.000747176	0.00274444	anno;
ABCA8_1	17:66946189:A:C:ABCA8:rs4968978	4.83372	0.000737515	0.00270896	anno;
ABCA8_1	17:66944842:C:T:ABCA8:rs2191214	4.82819	0.000718812	0.00264027	anno;
ABCA8_1	17:66943640:G:A:ABCA8:rs4147953	4.81624	0.000679987	0.00249769	anno;
ABCA8_1	17:66943738:A:G:ABCA8:rs4147951	4.81596	0.000679127	0.00249453	anno;
ABCA8_1	17:66928920:C:G:ABCA8:rs4147970	4.80554	0.000647111	0.00237695	anno;
ABCA8_1	17:66942266:G:T:ABCA8:rs11077818	4.79452	0.000614974	0.00225893	anno;
ABCA8_1	17:66942328:T:C:ABCA8:rs11077819	4.79337	0.000611725	0.00224699	anno;
ABCA8_1	17:66926017:A:G:ABCA8:rs4147975	4.79082	0.000604571	0.00222072	anno;
ABCA9_1	17:67057288:T:C:ABCA9:rs11871944	7.52805	0.903842	0.580644	anno;Promoter|CRE|peak|
ABCA9_1	17:67051337:A:T:ABCA9:rs11659114	7.30026	0.0070107	0.127547	anno;
ABCA9_1	17:67058953:G:A:ABCA9:rs7217543	7.28302	0.00667609	0.120096	anno;
ABCA9_1	17:67042762:T:G:ABCA9:rs1076401	7.17498	0.00406741	0.0725403	anno;
ABCA9_1	17:67056283:T:G:ABCA9:rs11657541	7.1262	0.0811967	0.0489294	anno;Promoter|
ABCA9_1	17:67033486:C:T:ABCA9:rs111346513	6.98658	0.00134642	0.0217115	anno;
ABCB8_1	7:150717550:T:C:ABCB8:rs12703108	5.07793	0.889017	0.734197	anno;CRE|DAR|peak|
ABCB8_1	7:150720071:A:G:ABCB8:rs11760487	4.86512	0.110983	0.265803	anno;
ABCB9_1	12:123447928:T:C:ABCB9:rs4275659	5.72658	0.0777371	0.261912	anno;peak|
ABCB9_1	12:123451018:G:C:ABCB9:rs61955196	5.46996	0.560937	0.0655963	anno;Promoter|peak|
ABCB9_1	12:123529056:A:G:ABCB9:rs11608811	5.26443	0.019429	0.0226564	anno;peak|
ABCB9_1	12:123483426:G:A:ABCB9:rs1984658	5.26003	0.00655522	0.0221568	anno;
ABCB9_1	12:123572495:C:T:ABCB9:rs10848428	5.2528	0.00631895	0.0213592	anno;peak|
ABCB9_1	12:123501972:T:C:ABCB9:rs12425850	5.24781	0.00616143	0.0208274	anno;
ABCB9_1	12:123502044:C:T:ABCB9:rs12425009	5.24781	0.00616143	0.0208274	anno;
ABCB9_1	12:123541606:C:T:ABCB9:rs10773921	5.24704	0.00613747	0.0207465	anno;peak|
ABCB9_1	12:123569375:A:G:ABCB9:rs4148863	5.24634	0.0177256	0.0206726	anno;CRE|DAR|peak|
ABCB9_1	12:123568619:A:C:ABCB9:rs4148862	5.24547	0.0176484	0.0205826	anno;Exon|DAR|peak|
ABCB9_1	12:123575742:A:G:ABCB9:rs1727307	5.24547	0.00608892	0.0205826	anno;peak|
ABCB9_1	12:123544878:A:G:ABCB9:rs7957096	5.23843	0.00587593	0.0198636	anno;peak|
ABCB9_1	12:123520071:C:T:ABCB9:rs11613937	5.23362	0.00573481	0.0193871	anno;
ABCB9_1	12:123591596:G:T:ABCB9:rs1790106	5.2083	0.0146313	0.0170681	anno;peak|
ABCB9_1	12:123586688:T:C:ABCB9:rs1790094	5.20638	0.00499943	0.0169041	anno;peak|
ABCB9_1	12:123595163:G:A:ABCB9:rs949143	5.20142	0.00487642	0.0164887	anno;Promoter|peak|
ABCB9_1	12:123460962:T:C:ABCB9:rs884956	5.1792	0.00436283	0.0147542	anno;5_UTR|peak|
ABCB9_1	12:123460719:C:G:ABCB9:rs883562	5.17845	0.00434657	0.0146993	anno;Promoter|peak|
ABCB9_1	12:123604492:G:A:ABCB9:rs1790121	5.17759	0.004328	0.0146366	anno;peak|
ABCB9_1	12:123464279:T:C:ABCB9:rs3759115	5.17655	0.00430559	0.0145609	anno;Promoter|peak|
ABCB9_1	12:123476586:G:A:ABCB9:rs7135296	5.1759	0.00429152	0.0145134	anno;
ABCB9_1	12:123466111:C:T:ABCB9:rs55742290	5.17391	0.0042491	0.0143701	anno;Promoter|peak|
ABCB9_1	12:123469647:G:T:ABCB9:rs3741530	5.17372	0.0397629	0.0143566	anno;3_UTR|peak|
ABCB9_1	12:123486282:A:T:ABCB9:rs28755851	5.16964	0.0041595	0.0140675	anno;peak|
ABCB9_1	12:123457619:C:T:ABCB9:rs7296418	5.1644	0.00405222	0.0137051	anno;
ABCB9_1	12:123606739:G:A:ABCB9:rs1790122	5.16367	0.00403763	0.0136559	anno;
ABCB9_1	12:123498253:G:T:ABCB9:rs7305511	5.08502	0.0079322	0.0092606	anno;peak|
ABCB9_1	12:123616861:G:A:ABCB9:rs1727295	5.05016	0.00668878	0.00781068	anno;DAR|peak|
ABCB9_1	12:123450765:G:C:ABCB9:rs4148856	5.00618	0.0538079	0.00631148	anno;Promoter|
ABCB9_1	12:123707529:A:G:ABCB9:rs12579925	4.96673	0.00154194	0.00522157	anno;
ABCB9_1	12:123550813:A:G:ABCB9:rs585522	4.88875	0.00308463	0.00360563	anno;peak|
ABCB9_1	12:123516917:C:G:ABCB9:rs1630820	4.88655	0.00105328	0.00356856	anno;
ABCB9_1	12:123460823:A:G:ABCB9:rs883563	4.88081	0.00102516	0.0034734	anno;5_UTR|
ABCB9_1	12:123622731:C:G:ABCB9:rs1611973	4.87826	0.0010129	0.00343193	anno;peak|
ABCB9_1	12:123697898:T:C:ABCB9:rs1790134	4.84821	0.0008797	0.00298115	anno;
ABCB9_1	12:123633382:T:C:ABCB9:rs1727305	4.84587	0.000870122	0.00294874	anno;
ABCB9_1	12:123667952:A:G:ABCB9:rs1616484	4.83993	0.000846287	0.00286807	anno;
ABCB9_1	12:123477311:T:C:ABCB9:rs937564	4.83871	0.00084149	0.00285183	anno;
ABCB9_1	12:123637509:G:C:ABCB9:rs1716184	4.83653	0.000832951	0.00282293	anno;peak|
ABCB9_1	12:123666649:G:A:ABCB9:rs12229700	4.83621	0.000831707	0.00281872	anno;
ABCB9_1	12:123680563:T:C:ABCB9:rs1727286	4.83498	0.000826975	0.0028027	anno;
ABCB9_1	12:123682594:G:A:ABCB9:rs11610710	4.83452	0.000825198	0.00279669	anno;
ABCB9_1	12:123673258:G:A:ABCB9:rs1790088	4.83441	0.000824768	0.00279523	anno;
ABCB9_1	12:123641200:C:T:ABCB9:rs1051434	4.83293	0.000819083	0.00277599	anno;3_UTR|
ABCB9_1	12:123851874:C:T:ABCB9:rs28498205	4.83063	0.000810361	0.00274647	anno;
ABCB9_1	12:123485188:A:G:ABCB9:rs883263	4.83055	0.00234794	0.00274548	anno;
ABCB9_1	12:123689897:G:A:ABCB9:rs1790129	4.82651	0.000794936	0.00269426	anno;
ABCB9_1	12:123518866:T:C:ABCB9:rs641760	4.82003	0.000771331	0.00261435	anno;peak|
ABCB9_1	12:123522150:C:G:ABCB9:rs520088	4.82003	0.00223566	0.00261435	anno;peak|
ABCB9_1	12:123528405:G:A:ABCB9:rs655293	4.82003	0.00223566	0.00261435	anno;peak|
ABCB9_1	12:123473254:T:C:ABCB9:rs1463877	4.81663	0.00075925	0.00257346	anno;
ABCB9_1	12:123648032:C:T:ABCB9:rs1727293	4.80887	0.000732347	0.00248239	anno;
ABCB9_1	12:123590165:T:C:ABCB9:rs1617156	4.79829	0.000697328	0.00236384	anno;Promoter|peak|
ABCB9_1	12:123794581:A:C:ABCB9:rs11057254	4.75613	0.000574134	0.00194672	anno;Promoter|
ABCB9_1	12:123856443:G:A:ABCB9:rs78455769	4.74588	0.000547788	0.0018575	anno;
ABCB9_1	12:123709409:C:T:ABCB9:rs1790104	4.73954	0.000532125	0.00180446	anno;
ABCB9_1	12:123710364:C:T:ABCB9:rs1790096	4.73881	0.00053035	0.00179844	anno;peak|
ABCB9_1	12:123704598:G:A:ABCB9:rs1716178	4.73112	0.000512032	0.00173641	anno;
ABCB9_1	12:123797567:T:C:ABCB9:rs11057261	4.72695	0.000502386	0.00170374	anno;
ABCB9_1	12:123794450:A:T:ABCB9:rs2277343	4.72639	0.000501097	0.00169937	anno;Promoter|
ABCB9_1	12:123810873:G:A:ABCB9:rs61388686	4.72504	0.000498023	0.00168896	anno;Exon|
ABCB9_1	12:123812629:G:C:ABCB9:rs28419092	4.72414	0.000496004	0.00168212	anno;
ABCB9_1	12:123791227:C:T:ABCB9:rs11057251	4.72329	0.000494079	0.0016756	anno;
ABCB9_1	12:123791165:C:G:ABCB9:rs11608305	4.72317	0.000493797	0.00167465	anno;
ABCB9_1	12:123817563:C:A:ABCB9:rs11611677	4.72233	0.000491915	0.00166827	anno;
ABCB9_1	12:123817576:C:G:ABCB9:rs11611680	4.72233	0.000491915	0.00166827	anno;
ABCB9_1	12:123767971:C:A:ABCB9:rs11057238	4.72219	0.000491598	0.0016672	anno;
ABCB9_1	12:123819125:C:T:ABCB9:rs11057275	4.72194	0.000491048	0.00166534	anno;
ABCB9_1	12:123820397:T:C:ABCB9:rs11057276	4.72163	0.000490356	0.00166299	anno;
ABCB9_1	12:123782866:C:T:ABCB9:rs12582153	4.72113	0.00048924	0.00165921	anno;
ABCB9_1	12:123826642:T:C:ABCB9:rs11608297	4.72087	0.000488659	0.00165725	anno;
ABCB9_1	12:123826774:G:A:ABCB9:rs56197170	4.72087	0.000488659	0.00165725	anno;
ABCB9_1	12:123830692:G:C:ABCB9:rs11057284	4.72042	0.000487657	0.00165385	anno;
ABCB9_1	12:123832912:T:C:ABCB9:rs35818434	4.72031	0.000487413	0.00165303	anno;
ABCB9_1	12:123620268:G:C:ABCB9:rs1619561	4.71772	0.000481687	0.00163363	anno;peak|
ABCB9_1	12:123762572:C:G:ABCB9:rs61953412	4.71387	0.000473334	0.00160534	anno;
ABCB9_1	12:123846812:T:C:ABCB9:rs28631104	4.70902	0.000463009	0.00157036	anno;peak|
ABCB9_1	12:123762004:G:A:ABCB9:rs7303754	4.70661	0.000457962	0.00155327	anno;
ABCB9_1	12:123614813:G:C:ABCB9:rs2510885	4.70355	0.000451642	0.00153186	anno;peak|
ABCB9_1	12:123682396:C:T:ABCB9:rs11614406	4.69994	0.000444306	0.00150701	anno;
ABCB9_1	12:123743927:G:A:ABCB9:rs10846489	4.69078	0.000426254	0.00144586	anno;
ABCB9_1	12:123615098:C:A:ABCB9:rs1790119	4.68814	0.000421193	0.00142872	anno;
ABCB9_1	12:123616514:A:G:ABCB9:rs1727294	4.68503	0.00120372	0.00140875	anno;DAR|peak|
ABCB9_1	12:123860939:T:C:ABCB9:rs60835840	4.67563	0.000398044	0.00135029	anno;
ABCB9_1	12:123861420:G:A:ABCB9:rs28450974	4.67539	0.000397606	0.00134881	anno;
ABCB9_1	12:123886384:C:T:ABCB9:rs28574664	4.66569	0.0003806	0.00129119	anno;
ABCB9_1	12:123878262:T:C:ABCB9:rs28825193	4.66458	0.000378712	0.00128479	anno;
ABCB9_1	12:123738876:C:T:ABCB9:rs1568428	4.66054	0.00107788	0.00126165	anno;Exon|DAR|peak|
ABCB9_1	12:123710835:A:C:ABCB9:rs1626703	4.65127	0.000356724	0.00121029	anno;5_UTR|
ABCB9_1	12:123533239:A:G:ABCB9:rs71444568	4.64245	0.000342878	0.00116338	anno;peak|
ABCB9_1	12:123717362:A:G:ABCB9:rs1619283	4.63549	0.000963354	0.00112776	anno;Promoter|peak|
ABCB9_1	12:123750073:T:C:ABCB9:rs11057219	4.63281	0.000328406	0.00111433	anno;
ABCB9_1	12:123750748:G:C:ABCB9:rs4553407	4.62572	0.000318166	0.00107963	anno;peak|
ABCB9_1	12:123771475:A:G:ABCB9:rs7974099	4.62095	0.000902774	0.00105693	anno;
ABCB9_1	12:123891209:C:T:ABCB9:rs73216931	4.6201	0.000899366	0.00105295	anno;peak|
ABCB9_1	12:123618544:G:T:ABCB9:rs1790116	4.60883	0.000295102	0.00100147	anno;peak|
ABCB9_1	12:123618603:C:T:ABCB9:rs1727316	4.60847	0.000294633	0.000999879	anno;peak|
ABCB9_1	12:123619838:G:A:ABCB9:rs1616131	4.599	0.0002825	0.000958756	anno;peak|
ABCB9_1	12:123619856:T:A:ABCB9:rs1616181	4.59879	0.000282227	0.000957829	anno;peak|
ABCB9_1	12:123620270:C:G:ABCB9:rs1790115	4.59492	0.000277428	0.000941565	anno;peak|
ABCB9_1	12:123621210:T:C:ABCB9:rs1727318	4.5859	0.000266565	0.000904741	anno;
ABCB9_1	12:123622209:A:G:ABCB9:rs2851441	4.5754	0.000254468	0.000863737	anno;
ABCB9_1	12:123623174:C:T:ABCB9:rs2695482	4.57067	0.000249219	0.000845942	anno;peak|
ABCB9_1	12:123632930:G:A:ABCB9:rs1727302	4.56783	0.000713348	0.000835416	anno;DAR|peak|
ABCB9_1	12:123627016:T:C:ABCB9:rs1106241	4.56164	0.000694154	0.000812967	anno;peak|
ABCB9_1	12:123632276:G:A:ABCB9:rs1569068	4.54976	0.000227311	0.000771669	anno;peak|
ABCB9_1	12:123471094:A:G:ABCB9:rs12811109	4.54946	0.000657965	0.000770638	anno;Exon|
ABCB9_1	12:123633424:G:A:ABCB9:rs1790090	4.54944	0.000226991	0.000770585	anno;
ABCB9_1	12:123634043:T:C:ABCB9:rs949142	4.54901	0.000656674	0.000769127	anno;peak|
ABCB9_1	12:123634122:A:G:ABCB9:rs884548	4.54897	0.00065657	0.000769006	anno;
ABCB9_1	12:123636841:A:G:ABCB9:rs1790108	4.5471	0.000651207	0.000762732	anno;peak|
ABCB9_1	12:123638930:G:A:ABCB9:rs1727315	4.54557	0.000223173	0.000757642	anno;peak|
ABCB9_1	12:123640664:C:A:ABCB9:rs1727314	4.5443	0.000221928	0.000753421	anno;peak|
ABCB9_1	12:123893910:T:C:ABCB9:rs28642812	4.54318	0.000220842	0.000749739	anno;
ABCB9_1	12:123893830:C:T:ABCB9:rs16917496	4.54137	0.0002191	0.000743831	anno;3_UTR|
ABCB9_1	12:123637752:C:G:ABCB9:rs1790109	4.5413	0.000219032	0.000743599	anno;peak|
ABCB9_1	12:123638070:A:T:ABCB9:rs1716185	4.54104	0.000218784	0.000742761	anno;
ABCB9_1	12:123638580:T:A:ABCB9:rs1627724	4.54066	0.000218412	0.000741499	anno;peak|
ABCB9_1	12:123643420:T:C:ABCB9:rs2695481	4.54053	0.000218287	0.000741076	anno;
ABCB9_1	12:123643689:T:C:ABCB9:rs2851438	4.54009	0.00021787	0.000739662	anno;peak|
ABCB9_1	12:123895906:G:C:ABCB9:rs28577594	4.53596	0.00062018	0.000726438	anno;DAR|peak|
ABCB9_1	12:123642955:C:G:ABCB9:rs2682429	4.53563	0.000213658	0.000725378	anno;
ABCB9_1	12:123644056:C:A:ABCB9:rs1047158	4.53372	0.000211875	0.000719336	anno;
ABCB9_1	12:123671310:T:C:ABCB9:rs1716156	4.53191	0.000210213	0.000713699	anno;
ABCB9_1	12:123669508:A:G:ABCB9:rs1716158	4.53188	0.000210177	0.000713576	anno;
ABCB9_1	12:123666948:A:G:ABCB9:rs10846478	4.53184	0.000210141	0.000713454	anno;
ABCB9_1	12:123668022:A:G:ABCB9:rs1615694	4.53184	0.000210141	0.000713454	anno;
ABCB9_1	12:123671761:T:C:ABCB9:rs10772995	4.5306	0.00020901	0.00070962	anno;
ABCB9_1	12:123645803:G:A:ABCB9:rs1051431	4.53034	0.0006051	0.000708796	anno;Exon|
ABCB9_1	12:123650335:C:T:ABCB9:rs1615350	4.52741	0.000206115	0.000699804	anno;
ABCB9_1	12:123651966:G:C:ABCB9:rs1716168	4.52632	0.000205138	0.000696492	anno;
ABCB9_1	12:123657338:T:C:ABCB9:rs2049114	4.52406	0.000588738	0.000689655	anno;
ABCB9_1	12:123670473:T:C:ABCB9:rs1716157	4.52362	0.000202735	0.000688341	anno;
ABCB9_1	12:123669468:T:C:ABCB9:rs1716159	4.52358	0.0002027	0.000688223	anno;
ABCB9_1	12:123667354:G:T:ABCB9:rs2851436	4.52354	0.000202665	0.000688104	anno;
ABCB9_1	12:123667950:T:C:ABCB9:rs1790105	4.52354	0.000202665	0.000688104	anno;
ABCB9_1	12:123665256:C:T:ABCB9:rs1790125	4.52351	0.000202635	0.000688002	anno;
ABCB9_1	12:123665695:A:G:ABCB9:rs1727306	4.52351	0.000202635	0.000688002	anno;
ABCB9_1	12:123672634:T:C:ABCB9:rs1790087	4.52239	0.000201644	0.000684642	anno;
ABCB9_1	12:123647725:G:C:ABCB9:rs1727296	4.51839	0.000198154	0.000672808	anno;
ABCB9_1	12:123648881:C:T:ABCB9:rs1716165	4.51786	0.0001977	0.000671268	anno;peak|
ABCB9_1	12:123660721:A:T:ABCB9:rs1716173	4.51173	0.000192491	0.000653605	anno;
ABCB9_1	12:123719528:T:G:ABCB9:rs7139321	4.50725	0.000188771	0.000640991	anno;peak|
ABCB9_1	12:123650714:A:G:ABCB9:rs1618679	4.50547	0.00018732	0.000636068	anno;
ABCB9_1	12:123651018:T:C:ABCB9:rs1621194	4.50547	0.00018732	0.000636068	anno;
ABCB9_1	12:123651162:A:G:ABCB9:rs1716167	4.4974	0.000180865	0.000614178	anno;
ABCB9_1	12:123733086:A:T:ABCB9:rs2337630	4.49605	0.000179814	0.000610614	anno;
ABCB9_1	12:123733324:C:A:ABCB9:rs2337631	4.49593	0.000520904	0.00061029	anno;
ABCB9_1	12:123560289:C:T:ABCB9:rs1260294	4.4941	0.000516785	0.00060547	anno;CRE|DAR|peak|
ABCB9_1	12:123697007:C:T:ABCB9:rs3018099	4.48985	0.000175042	0.000594431	anno;
ABCC1_2	16:17032151:C:T:ABCC1:rs79394433	-4.52218	0.999917	0.999917	anno;
ABCC1_1	16:15816881:A:G:ABCC1:rs11641598	4.43215	0.530055	0.530055	anno;Exon|
ABCC1_1	16:15781092:T:G:ABCC1:rs55734390	4.40244	0.469955	0.469955	anno;Promoter|
ABCC2_1	10:101689378:G:C:ABCC2:rs7077718	4.32986	0.0693027	0.044242	anno;Exon|peak|
ABCC2_1	10:101618381:C:T:ABCC2:rs11598441	-4.32036	0.023001	0.0425597	anno;
ABCC2_1	10:101617259:G:A:ABCC2:rs12416647	-4.3175	0.022734	0.0420658	anno;
ABCC2_1	10:101616744:C:G:ABCC2:rs7068581	-4.31695	0.0226829	0.0419713	anno;
ABCC2_1	10:101610723:G:A:ABCC2:rs3740063	-4.29269	0.0205533	0.0380314	anno;
ABCC2_1	10:101651165:T:C:ABCC2:rs61872202	-4.28463	0.186339	0.0368108	anno;
ABCC2_1	10:101650740:T:C:ABCC2:rs12415442	-4.28215	0.0196953	0.036444	anno;
ABCC2_1	10:101648996:C:G:ABCC2:rs11596617	-4.27857	0.0194128	0.0359213	anno;
ABCC2_1	10:101647611:T:C:ABCC2:rs11595871	-4.27399	0.0190571	0.0352632	anno;
ABCC2_1	10:101646975:G:A:ABCC2:rs35409024	-4.2632	0.170906	0.0337625	anno;
ABCC2_1	10:101621534:C:G:ABCC2:rs12781527	-4.24146	0.0167213	0.0309416	anno;
ABCC2_1	10:101635138:C:T:ABCC2:rs7088560	-4.23259	0.0161381	0.0298627	anno;
ABCC2_1	10:101635077:A:C:ABCC2:rs7070537	-4.2325	0.046759	0.0298522	anno;
ABCC2_1	10:101633020:T:C:ABCC2:rs11598781	-4.22847	0.0158751	0.029376	anno;
ABCC2_1	10:101632915:T:C:ABCC2:rs11190302	-4.22674	0.0157658	0.0291739	anno;
ABCC2_1	10:101625018:C:T:ABCC2:rs11819318	-4.22629	0.0157373	0.0291212	anno;
ABCC2_1	10:101628169:G:T:ABCC2:rs12776526	-4.22577	0.0157048	0.0290611	anno;
ABCC2_1	10:101631869:T:C:ABCC2:rs2862919	-4.22517	0.0156671	0.0289912	anno;
ABCC2_1	10:101631765:C:T:ABCC2:rs2862918	-4.22503	0.0156585	0.0289754	anno;
ABCC2_1	10:101631669:C:T:ABCC2:rs2862917	-4.22489	0.0156499	0.0289595	anno;
ABCC2_1	10:101630921:T:A:ABCC2:rs7076230	-4.22474	0.0156405	0.028942	anno;
ABCC2_1	10:101631013:T:C:ABCC2:rs7076478	-4.22468	0.0156368	0.0289352	anno;
ABCC2_1	10:101631353:C:T:ABCC2:rs7095052	-4.22434	0.0156156	0.028896	anno;
ABCC2_1	10:101619431:A:G:ABCC2:rs7903716	-4.22204	0.0154732	0.0286325	anno;
ABCC2_1	10:101622523:T:C:ABCC2:rs2862691	-4.22118	0.0154201	0.0285343	anno;
ABCC2_1	10:101686064:T:C:ABCC2:rs12259793	4.20306	0.014348	0.0265507	anno;Promoter|peak|
ABCC2_1	10:101675675:T:G:ABCC2:rs12768064	4.13435	0.0109485	0.0202609	anno;
ABCC2_1	10:101636163:G:C:ABCC2:rs12769233	-4.06794	0.00846638	0.0156682	anno;3_UTR|
ABCC2_1	10:101681962:A:G:ABCC2:rs11190322	4.05826	0.00815778	0.0150972	anno;
ABCC2_1	10:101668986:T:C:ABCC2:rs6584331	4.03055	0.0212711	0.0135818	anno;CRE|peak|
ABCC2_1	10:101662856:C:T:ABCC2:rs11595598	4.01832	0.0203051	0.0129651	anno;
ABCC2_1	10:101620771:G:C:ABCC2:rs12762549	-3.96384	0.0057057	0.0105598	anno;
ABCC2_1	10:101620948:G:A:ABCC2:rs11190298	-3.94972	0.00541251	0.0100173	anno;
ABCC3_1	17:48702463:A:G:ABCC3:rs2107440	-4.29787	0.149897	0.264833	anno;
ABCC3_1	17:48698906:A:C:ABCC3:rs4794172	-4.26519	0.380709	0.232065	anno;CRE|DAR|peak|
ABCC3_1	17:48705686:C:T:ABCC3:rs17717246	-4.18991	0.281893	0.171831	anno;peak|
ABCC3_1	17:48706151:T:A:ABCC3:rs9911750	-4.18198	0.0942573	0.166531	anno;
ABCC3_1	17:48715271:A:G:ABCC3:rs2412333	-4.17924	0.0932437	0.164741	anno;
ABCC4_1	13:96000749:T:C:ABCC4:rs10508016	7.56495	0.119768	0.175192	anno;
ABCC4_1	13:95996355:A:T:ABCC4:rs2992883	7.47713	0.0626127	0.0915869	anno;
ABCC4_1	13:96015484:A:G:ABCC4:rs9524942	7.466	0.0577001	0.0844009	anno;
ABCC4_1	13:96011615:C:T:ABCC4:rs9590246	7.46343	0.0566262	0.0828301	anno;
ABCC4_1	13:96010237:T:C:ABCC4:rs9590245	7.46282	0.056373	0.0824598	anno;
ABCC4_1	13:96011081:G:T:ABCC4:rs13313300	7.46155	0.161871	0.0816913	anno;
ABCC4_1	13:96013005:T:G:ABCC4:rs9590247	7.46108	0.161315	0.0814107	anno;DAR|peak|
ABCC4_1	13:96012790:G:A:ABCC4:rs3904878	7.4598	0.15981	0.0806507	anno;DAR|peak|
ABCC4_1	13:96001109:A:T:ABCC4:rs10851365	7.45843	0.0545893	0.0798505	anno;
ABCC4_1	13:96014829:T:C:ABCC4:rs9590248	7.44916	0.0510054	0.0746082	anno;
ABCC4_1	13:96016860:C:T:ABCC4:rs11070123	7.39302	0.0338782	0.0495552	anno;
ABCC5_1	3:184508101:A:G:ABCC5:rs7627535	4.0187	0.999637	0.999637	anno;
ABCC5_2	3:184383621:T:C:ABCC5:rs9851637	3.96535	0.999551	0.999551	anno;
ABCC6_2	16:16327885:G:A:ABCC6:rs201681904	8.09924	0.732255	0.858765	anno;
ABCC6_1	16:16285560:G:T:ABCC6:rs8057689	8.18444	0.184198	0.190383	anno;
ABCC6_1	16:16285652:C:T:ABCC6:rs6498617	8.18412	0.183898	0.190096	anno;
ABCC6_1	16:16289940:A:G:ABCC6:rs62030313	8.2019	0.186837	0.189399	anno;
ABCC6_1	16:16286614:G:C:ABCC6:rs6498618	8.15848	0.156384	0.161521	anno;
ABCC6_1	16:16286586:T:C:ABCC6:rs76470239	8.16588	0.152216	0.157173	anno;
ABCC6_1	16:16288356:G:A:ABCC6:rs7403832	8.12318	0.123653	0.129928	anno;
ABCC6_2	16:16351324:G:T:ABCC6:rs71236035	7.2891	0.235625	0.111778	anno;
ABCC8_1	11:17497794:G:C:ABCC8:rs985136	9.84919	0.999984	0.999611	anno;Promoter|CRE|DAR|peak|
ABCC8_2	11:17424711:T:C:ABCC8:rs2067043	7.22358	0.087193	0.108488	anno;peak|
ABCC8_2	11:17421790:A:G:ABCC8:rs2074312	7.19355	0.074765	0.0937761	anno;
ABCC8_2	11:17420537:T:C:ABCC8:rs11024275	7.19345	0.0725708	0.0910353	anno;peak|
ABCC8_2	11:17422955:A:C:ABCC8:rs4148638	7.19514	0.0598858	0.0761768	anno;
ABCC8_2	11:17414757:T:C:ABCC8:rs41282912	7.15097	0.0583502	0.0739733	anno;
ABCC8_2	11:17413568:C:T:ABCC8:rs10766396	7.12661	0.0412768	0.0526474	anno;
ABCC8_2	11:17412717:T:G:ABCC8:rs11024273	7.11679	0.0391876	0.050077	anno;
ABCC8_2	11:17412175:G:A:ABCC8:rs2074313	7.11002	0.0378138	0.0483857	anno;peak|
ABCC8_2	11:17380562:A:T:ABCC8:rs10766389	6.84535	0.0310372	0.0396543	anno;
ABCC8_2	11:17387403:T:C:ABCC8:rs2079042	6.88582	0.0256546	0.0331406	anno;peak|
ABCC8_2	11:17405347:A:C:ABCC8:rs1002227	6.92352	0.232675	0.0324631	anno;
ABCC8_2	11:17386329:T:G:ABCC8:rs34327804	6.83128	0.0230657	0.029917	anno;
ABCC8_2	11:17393268:G:A:ABCC8:rs10766391	6.82284	0.0220944	0.0287252	anno;
ABCC8_2	11:17394629:G:A:ABCC8:rs10832779	6.8203	0.0218117	0.0283781	anno;3_UTR|
ABCC8_2	11:17409069:A:G:ABCC8:rs5218	6.97039	0.0148038	0.0202965	anno;Exon|peak|
ABCC8_2	11:17366659:A:G:ABCC8:rs10832770	6.4204	0.0135906	0.0187394	anno;
ABCC8_2	11:17366158:C:G:ABCC8:rs10832769	6.35092	0.00976613	0.0138592	anno;
ABCC8_2	11:17365888:G:T:ABCC8:rs10832768	6.34274	0.00940213	0.013393	anno;
ABCC8_2	11:17365827:C:G:ABCC8:rs11024260	6.34156	0.0093509	0.0133273	anno;
ABCC8_2	11:17365132:A:G:ABCC8:rs10219196	6.32944	0.00884214	0.0126748	anno;
ABCC8_2	11:17364106:G:T:ABCC8:rs10766388	6.31622	0.00832334	0.0120087	anno;
ABCC8_2	11:17403163:T:A:ABCC8:rs3741203	6.7398	0.00822403	0.0116162	anno;
ABCC8_2	11:17401087:C:T:ABCC8:rs9633836	6.73935	0.00820695	0.0115947	anno;
ABCC8_2	11:17400288:T:G:ABCC8:rs10766392	6.7388	0.00818646	0.0115689	anno;
ABCC8_2	11:17330109:G:A:ABCC8:rs10766384	6.28795	0.00732772	0.0107276	anno;
ABCC8_2	11:17367249:A:G:ABCC8:rs10832771	6.53319	0.00679035	0.00988867	anno;
ABCC8_2	11:17404652:A:G:ABCC8:rs10766393	6.73837	0.00670271	0.00974301	anno;
ABCC8_2	11:17350640:G:A:ABCC8:rs4582955	6.21353	0.00531162	0.00812006	anno;
ABCC8_2	11:17350421:G:C:ABCC8:rs10832762	6.21348	0.00531055	0.00811867	anno;
ABCC8_2	11:17329798:T:G:ABCC8:rs10766383	6.21299	0.00529972	0.0081046	anno;
ABCC8_2	11:17348685:A:G:ABCC8:rs10766387	6.21196	0.00530733	0.00808633	anno;
ABCC8_2	11:17348276:C:G:ABCC8:rs11525338	6.21136	0.0052941	0.00806922	anno;
ABCC8_2	11:17353910:C:A:ABCC8:rs10832765	6.20976	0.00522861	0.00801222	anno;Exon|
ABCC8_2	11:17333377:G:T:ABCC8:rs12225041	6.20707	0.00517058	0.0079368	anno;
ABCC8_2	11:17334242:G:A:ABCC8:rs11024250	6.20582	0.00514376	0.00790194	anno;
ABCC8_2	11:17351286:T:C:ABCC8:rs10832764	6.2054	0.00513472	0.00789019	anno;
ABCC8_2	11:17341577:G:T:ABCC8:rs10832758	6.2045	0.00514503	0.00787641	anno;
ABCC8_2	11:17347455:T:C:ABCC8:rs11024254	6.2016	0.00508353	0.00779681	anno;
ABCC9_1	12:22044210:T:C:ABCC9:rs2032775	17.7682	0.000696045	0.167793	anno;
ABCC9_1	12:22045853:G:A:ABCC9:rs1914361	17.7535	0.774849	0.141832	anno;
ABCC9_1	12:22045799:T:C:ABCC9:rs2292771	17.753	0.000671077	0.136294	anno;
ABCC9_1	12:22042512:A:G:ABCC9:rs4762717	17.7468	0.000668031	0.12268	anno;
ABCC9_1	12:22044843:T:C:ABCC9:rs4148661	17.7461	0.00625392	0.121152	anno;DAR|peak|
ABCC9_1	12:22037349:T:G:ABCC9:rs7314764	17.7315	0.0920714	0.098138	anno;
ABCC9_1	12:22037102:T:C:ABCC9:rs1283808	17.7286	0.0691447	0.093417	anno;
ABCC9_1	12:22036979:C:T:ABCC9:rs1388698	17.727	0.059117	0.0909307	anno;
ABCC9_1	12:22047455:T:C:ABCC9:rs7978092	17.7048	0.00738154	0.063205	anno;
ABCE1_1	4:145863474:G:A:ABCE1:rs114344213	5.46821	0.420363	0.474076	anno;
ABCE1_1	4:145895241:A:T:ABCE1:rs76455137	5.08162	0.079972	0.0900275	anno;
ABCE1_1	4:146072502:T:C:ABCE1:rs36226294	5.04437	0.0617773	0.069085	anno;
ABCE1_1	4:145982586:C:T:ABCE1:rs76949030	4.94892	0.131886	0.0514173	anno;peak|
ABCE1_1	4:146042445:C:G:ABCE1:rs10519725	4.9572	0.0448684	0.0502364	anno;
ABCE1_1	4:146037320:A:G:ABCE1:rs34330278	4.9568	0.0447953	0.0501537	anno;
ABCE1_1	4:145952508:A:G:ABCE1:rs116580152	4.77975	0.041676	0.0467896	anno;
ABCE1_1	4:145923676:G:T:ABCE1:rs17781187	4.77907	0.0415629	0.0466609	anno;
ABCE1_1	4:146095528:C:T:ABCE1:rs36224528	4.78035	0.038568	0.0431129	anno;Promoter|peak|
ABCE1_1	4:146080339:C:T:ABCE1:rs12498677	4.77958	0.0384512	0.0429803	anno;3_UTR|
ABCE1_1	4:146077132:T:C:ABCE1:rs36225838	4.7841	0.0360054	0.0400794	anno;Exon|
ABCF2_1	7:150941609:T:C:ABCF2:rs219230	7.65645	0.654891	0.57893	anno;peak|
ABCF2_1	7:150948325:G:C:ABCF2:rs58125572	7.50496	0.21463	0.183451	anno;peak|
ABCF2_1	7:150952990:A:G:ABCF2:rs12668799	7.3863	0.0364752	0.0816709	anno;
ABCF2_1	7:150951016:A:G:ABCF2:rs4472433	7.31896	0.0241612	0.0617325	anno;peak|
ABCF2_1	7:150953539:A:G:ABCF2:rs4236429	7.25767	0.0161938	0.0436482	anno;
ABCF2_1	7:150953562:T:C:ABCF2:rs4236430	7.25602	0.0160405	0.0433363	anno;
ABCF2_1	7:150954184:T:C:ABCF2:rs2530459	7.22232	0.0132321	0.03764	anno;
ABCF2_1	7:150951819:G:A:ABCF2:rs3789823	7.17978	0.0102552	0.0313745	anno;
ABCF3_2	3:183916129:T:C:ABCF3:rs4485747	5.94909	0.0480265	0.196744	anno;
ABCF3_2	3:183916134:A:G:ABCF3:rs4549300	5.94909	0.0480265	0.196744	anno;
ABCF3_2	3:183920167:A:G:ABCF3:rs6787471	5.94364	0.0168696	0.179221	anno;
ABCF3_2	3:183921254:A:G:ABCF3:rs1877359	5.92958	0.0154685	0.158324	anno;
ABCF3_1	3:183948762:G:C:ABCF3:rs6783338	7.78503	0.112843	0.0572054	anno;Promoter|CRE|peak|
ABCF3_1	3:183947365:G:C:ABCF3:rs6795462	7.78466	0.112566	0.0570476	anno;Promoter|CRE|DAR|peak|
ABCF3_1	3:183941375:C:G:ABCF3:rs111278050	7.79621	0.0255395	0.0463734	anno;
ABCF3_1	3:183952130:G:A:ABCF3:rs112534894	7.7844	0.0684317	0.0424613	anno;Promoter|CRE|DAR|peak|
ABCF3_1	3:183943824:G:A:ABCF3:rs113836476	7.78219	0.023282	0.0417671	anno;
ABCF3_1	3:183957218:T:C:ABCF3:rs113200353	7.78173	0.0232121	0.0416255	anno;Exon|
ABCF3_1	3:183962862:A:G:ABCF3:rs77177287	7.77741	0.022562	0.040312	anno;3_UTR|
ABCF3_1	3:183963916:C:T:ABCF3:rs77579397	7.77658	0.022438	0.0400622	anno;
ABCF3_1	3:183965666:T:C:ABCF3:rs112783958	7.77509	0.0222188	0.039621	anno;peak|
ABCF3_1	3:183966818:A:C:ABCF3:rs2233462	7.77413	0.206255	0.0393412	anno;Promoter|peak|
ABCF3_1	3:183974480:T:C:ABCF3:rs112813049	7.76614	0.0209506	0.0370822	anno;
ABCF3_1	3:183975678:T:C:ABCF3:rs111485207	7.76469	0.0207525	0.0366876	anno;peak|
ABCF3_1	3:183977565:A:C:ABCF3:rs113537348	7.76384	0.0206366	0.0364572	anno;3_UTR|
ABCF3_1	3:183982788:C:T:ABCF3:rs112895117	7.76384	0.0206366	0.0364572	anno;
ABCF3_1	3:183984746:A:G:ABCF3:rs111732103	7.76384	0.0206366	0.0364572	anno;
ABCF3_1	3:183986380:C:T:ABCF3:rs113784931	7.76384	0.0206366	0.0364572	anno;
ABCF3_1	3:183986979:C:T:ABCF3:rs112196647	7.76384	0.0206366	0.0364572	anno;
ABCF3_1	3:183988107:G:A:ABCF3:rs112464283	7.76384	0.0206366	0.0364572	anno;
ABCF3_1	3:183997734:T:C:ABCF3:rs140724301	7.82263	0.0256445	0.0363504	anno;
ABCF3_2	3:183893271:G:C:ABCF3:rs1976700	8.1133	0.837539	0.0351623	anno;Promoter|
ABCF3_1	3:183974535:T:C:ABCF3:rs111506986	7.76667	0.0176286	0.0284076	anno;
ABCF3_2	3:183900338:C:T:ABCF3:rs843367	5.00713	0.0110627	0.027608	anno;
ABCF3_1	3:183938783:A:G:ABCF3:rs113628099	7.77448	0.0118061	0.0267702	anno;
ABCF3_1	3:183875419:T:C:ABCF3:rs71318356	7.86667	0.00366764	0.0244447	anno;Promoter|
ABCF3_1	3:183993908:A:G:ABCF3:rs199785048	7.76384	0.0504991	0.0237248	anno;Promoter|CRE|DAR|peak|
ABCF3_1	3:184004748:A:T:ABCF3:rs112718059	7.75619	0.0165872	0.0224674	anno;
ABCF3_2	3:183900729:C:T:ABCF3:rs843365	4.95356	0.00966641	0.0210086	anno;Exon|
ABCF3_2	3:183900836:A:G:ABCF3:rs843364	4.95356	0.00966641	0.0210086	anno;3_UTR|
ABCF3_2	3:183902801:C:T:ABCF3:rs6443954	4.95302	0.00965343	0.020952	anno;
ABCF3_2	3:183904868:G:A:ABCF3:rs2942057	4.95285	0.00964938	0.0209344	anno;peak|
ABCF3_2	3:183904977:C:T:ABCF3:rs3792305	4.91053	0.00893196	0.0167759	anno;peak|
ABCF3_1	3:184005785:G:A:ABCF3:rs112975088	7.71106	0.0123926	0.0163868	anno;
ABCF3_2	3:183906515:C:T:ABCF3:rs843345	4.85643	0.242661	0.015152	anno;Promoter|
ABCF3_2	3:183907032:C:G:ABCF3:rs843344	4.85632	0.242598	0.0151443	anno;Promoter|
ABCF3_2	3:183908002:C:T:ABCF3:rs843342	4.856	0.00846867	0.0151219	anno;
ABCF3_1	3:183905309:C:G:ABCF3:rs35315125	7.79586	0.00246201	0.0151121	anno;
ABCF3_2	3:183907902:G:A:ABCF3:rs843343	4.85608	0.00823459	0.0146267	anno;
ABCF3_2	3:183897625:T:C:ABCF3:rs843368	4.85431	0.00758471	0.0130522	anno;Promoter|
ABCF3_1	3:184006578:G:A:ABCF3:rs113927964	7.67223	0.00967522	0.0126057	anno;
ABCF3_1	3:183930638:T:C:ABCF3:rs6806162	7.56992	0.00361889	0.0113639	anno;
ABCF3_2	3:183912225:G:A:ABCF3:rs843337	5.63076	0.00262822	0.0107016	anno;peak|
ABCF3_1	3:183928747:A:G:ABCF3:rs71318361	7.72926	0.00213502	0.0105654	anno;
ABCF3_1	3:183929775:C:T:ABCF3:rs71318362	7.72668	0.00210584	0.0103958	anno;
ABCF3_1	3:183931860:T:C:ABCF3:rs71631245	7.72133	0.00204688	0.0100548	anno;
ABCF3_1	3:183932056:G:C:ABCF3:rs113961320	7.72053	0.0020382	0.0100047	anno;
ABCF3_2	3:183919950:G:A:ABCF3:rs7371826	5.62608	0.00272064	0.00996716	anno;
ABCF3_1	3:183932486:A:G:ABCF3:rs112702723	7.71923	0.00202428	0.00992457	anno;
ABCF3_1	3:183926364:C:T:ABCF3:rs12696513	7.69671	0.00255631	0.00975959	anno;
ABCF3_2	3:183905103:C:G:ABCF3:rs2942056	5.57116	0.00232608	0.00913562	anno;
ABCF3_2	3:183875822:C:T:ABCF3:rs843370	5.45861	0.00361215	0.00898342	anno;
ABCG1_1	21:43723820:A:G:ABCG1:rs34948282	-4.15048	0.0456258	0.251912	anno;
ABCG1_1	21:43722227:T:C:ABCG1:rs67556845	-4.14893	0.131445	0.250391	anno;peak|
ABCG1_1	21:43720875:C:T:ABCG1:rs35803624	-4.14772	0.0451363	0.24921	anno;Exon|peak|
ABCG1_1	21:43719916:A:G:ABCG1:rs55859894	-4.14698	0.777793	0.248487	anno;Exon|peak|
ABCG4_1	11:118994417:T:A:ABCG4:rs11217156	-5.65499	0.0190584	0.0442944	anno;peak|
ABCG4_1	11:118992177:T:C:ABCG4:rs583713	-5.65012	0.0537897	0.043131	anno;Promoter|CRE|peak|
ABCG4_1	11:118992919:A:C:ABCG4:rs673454	-5.64897	0.0184413	0.0428592	anno;Promoter|peak|
ABCG4_1	11:118993549:T:C:ABCG4:rs2508950	-5.64802	0.0183465	0.0426389	anno;
ABCG4_1	11:118993632:G:A:ABCG4:rs1179920	-5.64786	0.0183298	0.0425999	anno;peak|
ABCG4_1	11:118994357:T:A:ABCG4:rs7119384	-5.64684	0.0182283	0.042364	anno;5_UTR|peak|
ABCG4_1	11:118994516:G:A:ABCG4:rs7103544	-5.6465	0.0181949	0.0422862	anno;peak|
ABCG4_1	11:118995353:C:G:ABCG4:rs624588	-5.64539	0.0180845	0.0420294	anno;
ABCG4_1	11:118996781:A:G:ABCG4:rs652872	-5.6433	0.0178798	0.0415534	anno;
ABCG4_1	11:119000044:C:G:ABCG4:rs616458	-5.64086	0.0176435	0.041004	anno;
ABCG4_1	11:119006300:A:C:ABCG4:rs641382	-5.63609	0.0171906	0.0399507	anno;
ABCG4_1	11:119003322:A:C:ABCG4:rs662069	-5.63497	0.0170858	0.0397069	anno;
ABCG4_1	11:119004009:T:G:ABCG4:rs672189	-5.63403	0.0169986	0.0395043	anno;
ABCG4_1	11:119004026:T:C:ABCG4:rs537153	-5.63403	0.0169979	0.0395026	anno;
ABCG4_1	11:119005132:T:C:ABCG4:rs100803	-5.63235	0.0488193	0.039143	anno;3_UTR|peak|
ABCG4_1	11:119005485:T:C:ABCG4:rs7234	-5.63229	0.0488039	0.0391306	anno;3_UTR|peak|
ABCG4_1	11:119006760:T:A:ABCG4:rs199951506	-5.63107	0.0167263	0.0388709	anno;
ABCG4_1	11:119006764:T:G:ABCG4:rs200907799	-5.57773	0.0125279	0.0291087	anno;
ABCG4_1	11:119006755:T:G:ABCG4:rs4262736	-5.55125	0.0108646	0.0252417	anno;
ABCG4_1	11:119019877:A:G:ABCG4:rs71482170	-5.53338	0.28496	0.022936	anno;Promoter|CRE|peak|
ABCG4_1	11:118985638:C:G:ABCG4:rs2509855	-5.41301	0.00522156	0.0121254	anno;
ABCG4_1	11:119041659:T:C:ABCG4:rs626984	-5.38518	0.0422968	0.0104851	anno;CRE|DAR|peak|
ABCG4_1	11:118985151:C:T:ABCG4:rs595782	-5.37973	0.00438937	0.0101918	anno;
ABCG4_1	11:118983681:C:T:ABCG4:rs682795	-5.3784	0.00435896	0.0101211	anno;
ABCG4_1	11:118985670:T:A:ABCG4:rs1305527	-5.37803	0.00435067	0.0101019	anno;
ABCG4_1	11:118982670:T:C:ABCG4:rs554589	-5.37603	0.00430579	0.00999758	anno;
ABCG4_1	11:118982671:G:A:ABCG4:rs588539	-5.37603	0.00430579	0.00999758	anno;
ABCG4_1	11:118964330:A:G:ABCG4:rs640603	-5.34632	0.0106986	0.00856957	anno;
ABCG4_1	11:118980039:T:C:ABCG4:rs510435	-5.31279	0.029089	0.0072092	anno;CRE|DAR|peak|
ABCG4_1	11:118978132:G:C:ABCG4:rs7936752	-5.31134	0.0288721	0.00715541	anno;Promoter|CRE|peak|
ABCG4_1	11:118977911:G:A:ABCG4:rs2509050	-5.31096	0.0288166	0.00714165	anno;Promoter|CRE|peak|
ABCG4_1	11:118974485:G:A:ABCG4:rs599385	-5.28516	0.00269564	0.00625708	anno;peak|
ABCG4_1	11:118970696:A:C:ABCG4:rs604714	-5.24692	0.00221865	0.00514923	anno;Promoter|peak|
ABCG4_1	11:119055362:G:A:ABCG4:rs7929799	-5.23054	0.00204204	0.0047391	anno;Promoter|
ABCG4_1	11:118976719:A:G:ABCG4:rs639373	-5.21286	0.00186768	0.00433419	anno;peak|
ABCG4_1	11:118970878:C:A:ABCG4:rs603826	-5.20673	0.00181087	0.00420227	anno;Promoter|
ABCG4_1	11:118966780:C:A:ABCG4:rs2509851	-5.20669	0.00181054	0.00420149	anno;Promoter|peak|
ABCG4_1	11:118967291:G:A:ABCG4:rs7759	-5.20633	0.00180722	0.0041938	anno;3_UTR|peak|
ABCG4_1	11:119054488:T:C:ABCG4:rs10790286	-5.19341	0.00169359	0.00392993	anno;3_UTR|
ABCG4_1	11:118999877:G:A:ABCG4:rs627651	5.1584	0.00142145	0.00329806	anno;
ABCG4_1	11:119015232:A:G:ABCG4:rs686452	5.14768	0.00134752	0.00312642	anno;peak|
ABCG4_1	11:118965048:A:G:ABCG4:rs7350	-5.13773	0.0120125	0.00297536	anno;3_UTR|CRE|peak|
ABCG4_1	11:118986630:G:A:ABCG4:rs608444	-5.12391	0.0011975	0.00277816	anno;DAR|peak|
ABCG4_1	11:118987971:G:A:ABCG4:rs571445	-5.1219	0.0011856	0.00275051	anno;peak|
ABCG4_1	11:118989739:G:A:ABCG4:rs533993	-5.11914	0.00116952	0.0027132	anno;
ABCG4_1	11:118971251:G:A:ABCG4:rs649870	-5.11018	0.00111887	0.00259562	anno;Promoter|peak|
ABCG4_1	11:118965479:A:G:ABCG4:rs1134734	-5.08655	0.00932764	0.00230998	anno;Promoter|
ABCG4_1	11:118967524:T:C:ABCG4:rs8551	-5.08219	0.000974714	0.00226099	anno;3_UTR|peak|
ABCG4_1	11:119019520:C:A:ABCG4:rs4301800	5.08202	0.0281098	0.00225911	anno;Promoter|
ABCG4_1	11:119018023:T:C:ABCG4:rs1168815	5.07613	0.000946155	0.0021947	anno;CRE|peak|
ABCG4_1	11:119016176:A:G:ABCG4:rs671872	5.0682	0.00852425	0.0021109	anno;CRE|DAR|peak|
ABCG4_1	11:119015932:C:T:ABCG4:rs595412	5.06715	0.00848064	0.00210009	anno;CRE|DAR|peak|
ABHD11_1	7:73212129:G:A:ABHD11:rs9690193	-6.03167	0.130215	0.136111	anno;
ABHD11_1	7:73160624:T:C:ABHD11:rs67418520	-5.93059	0.0286979	0.0779565	anno;
ABHD11_1	7:73159381:C:G:ABHD11:rs11761190	-5.92984	0.0286082	0.0776939	anno;peak|
ABHD11_1	7:73157315:T:C:ABHD11:rs34062071	-5.92818	0.0814576	0.0771142	anno;CRE|DAR|peak|
ABHD11_1	7:73154783:C:G:ABHD11:rs13228948	-5.92577	0.0281248	0.0762778	anno;peak|
ABHD11_1	7:73188087:A:G:ABHD11:rs13228585	-5.92788	0.0283766	0.0758933	anno;
ABHD11_1	7:73150511:C:T:ABHD11:rs1059779	-5.90903	0.0262614	0.0730351	anno;3_UTR|peak|
ABHD11_1	7:73201957:T:G:ABHD11:rs59773062	-5.91322	0.0267086	0.071086	anno;
ABHD11_1	7:73148316:T:A:ABHD11:rs68143071	-5.89004	0.0243589	0.0684942	anno;
ABHD11_1	7:73148168:T:C:ABHD11:rs141117486	-5.88343	0.0237415	0.0665309	anno;
ABHD11_1	7:73153228:T:G:ABHD11:rs3812318	-5.88612	0.590354	0.0659879	anno;Promoter|CRE|peak|
ABHD11_1	7:73148664:C:T:ABHD11:rs34465531	-5.88469	0.0238527	0.0655758	anno;Promoter|peak|
ABHD11_1	7:73149033:G:C:ABHD11:rs35614186	-5.88108	0.023524	0.0645493	anno;Promoter|CRE|DAR|peak|
ABHD11_1	7:73149124:G:A:ABHD11:rs35554452	-5.88065	0.210355	0.0644284	anno;Promoter|CRE|DAR|peak|
ABHD11_1	7:73147125:T:C:ABHD11:rs11768181	-5.86836	0.022428	0.0635566	anno;
ABHD12_1	20:25262403:T:C:ABHD12:rs2261785	11.1415	0.00498741	0.00798346	anno;peak|
ABHD12_1	20:25262396:C:G:ABHD12:rs2261784	11.1415	0.00498557	0.00798051	anno;peak|
ABHD12_1	20:25336445:A:G:ABHD12:rs2482932	11.1247	0.0120111	0.00663338	anno;
ABHD12_1	20:25272633:C:T:ABHD12:rs2474777	11.1232	0.0118094	0.00652197	anno;
ABHD12_1	20:25431749:T:C:ABHD12:rs6050631	11.1221	0.00402664	0.00644555	anno;
ABHD12_1	20:25267893:G:A:ABHD12:rs1077889	11.122	0.00401967	0.00643438	anno;peak|
ABHD12_1	20:25275843:T:C:ABHD12:rs2258719	11.1056	0.0033566	0.005373	anno;CRE|peak|
ABHD12_1	20:25387521:A:G:ABHD12:rs4815423	11.1037	0.00952828	0.00526219	anno;Promoter|
ABHD12_1	20:25273929:G:A:ABHD12:rs2424704	11.1025	0.00324358	0.00519208	anno;peak|
ABHD12_1	20:25275890:A:C:ABHD12:rs2257420	11.1021	0.00322992	0.00517022	anno;CRE|peak|
ABHD12_1	20:25404027:A:C:ABHD12:rs2500448	11.1015	0.00320633	0.00513245	anno;
ABHD12_1	20:25268920:C:T:ABHD12:rs3002702	11.1014	0.00320472	0.00512987	anno;Exon|
ABHD12_1	20:25269743:T:G:ABHD12:rs2257985	11.1014	0.00320472	0.00512987	anno;
ABHD12_1	20:25270003:C:T:ABHD12:rs2257988	11.1014	0.00320472	0.00512987	anno;
ABHD12_1	20:25270339:C:T:ABHD12:rs2257991	11.1014	0.00320472	0.00512987	anno;peak|
ABHD12_1	20:25271086:C:T:ABHD12:rs2257432	11.1014	0.00320472	0.00512987	anno;peak|
ABHD12_1	20:25271326:T:C:ABHD12:rs2258066	11.1014	0.00320472	0.00512987	anno;peak|
ABHD12_1	20:25272323:A:C:ABHD12:rs2258135	11.1014	0.0092887	0.00512987	anno;CRE|DAR|peak|
ABHD12_1	20:25272490:C:G:ABHD12:rs2258201	11.1014	0.0092887	0.00512987	anno;
ABHD12_1	20:25273435:T:C:ABHD12:rs2258563	11.1014	0.00320472	0.00512987	anno;
ABHD12_1	20:25274318:T:C:ABHD12:rs2258617	11.1014	0.00320472	0.00512987	anno;
ABHD12_1	20:25276680:C:G:ABHD12:rs2258769	11.1014	0.0092887	0.00512987	anno;CRE|DAR|peak|
ABHD12_1	20:25278261:G:A:ABHD12:rs7018	11.1014	0.00320472	0.00512987	anno;3_UTR|DAR|peak|
ABHD12_1	20:25279213:C:T:ABHD12:rs2258879	11.1014	0.00320472	0.00512987	anno;
ABHD12_1	20:25279315:G:A:ABHD12:rs2257496	11.1014	0.00320472	0.00512987	anno;
ABHD12_1	20:25279539:T:C:ABHD12:rs2258884	11.1014	0.00320472	0.00512987	anno;peak|
ABHD12_1	20:25280205:C:T:ABHD12:rs2259837	11.1014	0.00320472	0.00512987	anno;peak|
ABHD12_1	20:25280781:G:A:ABHD12:rs2259873	11.1014	0.00320472	0.00512987	anno;peak|
ABHD12_1	20:25281184:C:G:ABHD12:rs11100	11.1014	0.0092887	0.00512987	anno;3_UTR|
ABHD12_1	20:25281333:A:G:ABHD12:rs1046073	11.1014	0.0092887	0.00512987	anno;3_UTR|
ABHD12_1	20:25281398:T:C:ABHD12:rs2424708	11.1014	0.0092887	0.00512987	anno;3_UTR|
ABHD12_1	20:25281733:C:T:ABHD12:rs2259926	11.1014	0.0092887	0.00512987	anno;CRE|DAR|peak|
ABHD12_1	20:25281834:C:G:ABHD12:rs2259928	11.1014	0.0092887	0.00512987	anno;CRE|DAR|peak|
ABHD12_1	20:25282433:G:A:ABHD12:rs2259956	11.1014	0.00320472	0.00512987	anno;peak|
ABHD12_1	20:25283886:G:C:ABHD12:rs2424710	11.1014	0.00320472	0.00512987	anno;
ABHD12_1	20:25285507:A:C:ABHD12:rs6115140	11.1014	0.00320472	0.00512987	anno;
ABHD12_1	20:25286059:T:C:ABHD12:rs2424711	11.1014	0.00320472	0.00512987	anno;
ABHD12_1	20:25286160:A:G:ABHD12:rs6132826	11.1014	0.00320472	0.00512987	anno;
ABHD12_1	20:25288505:C:T:ABHD12:rs884613	11.1014	0.00320472	0.00512987	anno;DAR|peak|
ABHD12_1	20:25290512:C:A:ABHD12:rs2500432	11.1014	0.0300179	0.00512987	anno;CRE|DAR|peak|
ABHD12_1	20:25290543:T:C:ABHD12:rs6037083	11.1014	0.0300179	0.00512987	anno;CRE|DAR|peak|
ABHD12_1	20:25291826:A:G:ABHD12:rs1888998	11.1014	0.00320472	0.00512987	anno;peak|
ABHD12_1	20:25291848:A:G:ABHD12:rs1888999	11.1014	0.00320472	0.00512987	anno;peak|
ABHD12_1	20:25292545:C:T:ABHD12:rs4813557	11.1014	0.00320472	0.00512987	anno;
ABHD12_1	20:25292712:C:T:ABHD12:rs4355182	11.1014	0.00320472	0.00512987	anno;
ABHD12_1	20:25293570:G:A:ABHD12:rs66999585	11.1014	0.00320472	0.00512987	anno;
ABHD12_1	20:25295787:T:C:ABHD12:rs2297496	11.1014	0.0092887	0.00512987	anno;CRE|peak|
ABHD12_1	20:25296335:A:G:ABHD12:rs2500433	11.1014	0.0092887	0.00512987	anno;
ABHD12_1	20:25296499:T:C:ABHD12:rs2482948	11.1014	0.00320472	0.00512987	anno;
ABHD12_1	20:25296970:G:T:ABHD12:rs6083799	11.1014	0.00320472	0.00512987	anno;
ABHD12_1	20:25297909:G:A:ABHD12:rs2297497	11.1014	0.00320472	0.00512987	anno;
ABHD12_1	20:25298087:A:G:ABHD12:rs7267979	11.1014	0.00320472	0.00512987	anno;
ABHD12_1	20:25298988:G:A:ABHD12:rs1888997	11.1014	0.00320472	0.00512987	anno;
ABHD12_1	20:25299756:T:C:ABHD12:rs2482919	11.1014	0.00320472	0.00512987	anno;peak|
ABHD12_1	20:25300113:C:T:ABHD12:rs7343481	11.1014	0.00320472	0.00512987	anno;peak|
ABHD12_1	20:25301845:T:G:ABHD12:rs4815404	11.1014	0.00320472	0.00512987	anno;peak|
ABHD12_1	20:25304507:G:A:ABHD12:rs6115146	11.1014	0.00320472	0.00512987	anno;
ABHD12_1	20:25305202:C:T:ABHD12:rs6037085	11.1014	0.00320472	0.00512987	anno;DAR|peak|
ABHD12_1	20:25306338:A:G:ABHD12:rs6037086	11.1014	0.00320472	0.00512987	anno;peak|
ABHD12_1	20:25308793:A:T:ABHD12:rs6050532	11.1014	0.0092887	0.00512987	anno;peak|
ABHD12_1	20:25308981:T:C:ABHD12:rs2482923	11.1014	0.00320472	0.00512987	anno;
ABHD12_1	20:25317060:A:G:ABHD12:rs6083804	11.1014	0.00320472	0.00512987	anno;
ABHD12_1	20:25317356:T:C:ABHD12:rs6083805	11.1014	0.0092887	0.00512987	anno;peak|
ABHD12_1	20:25318879:T:C:ABHD12:rs6050542	11.1014	0.0092887	0.00512987	anno;peak|
ABHD12_1	20:25319212:C:T:ABHD12:rs6076336	11.1014	0.0092887	0.00512987	anno;
ABHD12_1	20:25320228:T:A:ABHD12:rs6050544	11.1014	0.00320472	0.00512987	anno;CRE|peak|
ABHD12_1	20:25332906:A:G:ABHD12:rs2990512	11.1014	0.00320472	0.00512987	anno;
ABHD12_1	20:25334445:G:A:ABHD12:rs2482931	11.1014	0.0092887	0.00512987	anno;
ABHD12_1	20:25335687:A:G:ABHD12:rs6037095	11.1014	0.00320472	0.00512987	anno;peak|
ABHD12_1	20:25336186:C:G:ABHD12:rs6050562	11.1014	0.00320472	0.00512987	anno;
ABHD12_1	20:25346439:A:C:ABHD12:rs4813561	11.1014	0.00320472	0.00512987	anno;
ABHD12_1	20:25346678:C:T:ABHD12:rs4815408	11.1014	0.00320472	0.00512987	anno;
ABHD12_1	20:25354694:T:G:ABHD12:rs2500399	11.1014	0.00320472	0.00512987	anno;
ABHD12_1	20:25354705:A:G:ABHD12:rs2500400	11.1014	0.00320472	0.00512987	anno;
ABHD12_1	20:25359758:A:C:ABHD12:rs2500404	11.1014	0.00320472	0.00512987	anno;peak|
ABHD12_1	20:25360826:A:G:ABHD12:rs2500405	11.1014	0.00320472	0.00512987	anno;
ABHD12_1	20:25361216:T:C:ABHD12:rs2482941	11.1014	0.0092887	0.00512987	anno;
ABHD12_1	20:25365340:T:C:ABHD12:rs4813563	11.1014	0.00320472	0.00512987	anno;
ABHD12_1	20:25369095:A:G:ABHD12:rs6037103	11.1014	0.00320472	0.00512987	anno;
ABHD12_1	20:25374882:G:A:ABHD12:rs2500423	11.1014	0.00320472	0.00512987	anno;
ABHD12_1	20:25377688:A:T:ABHD12:rs2263204	11.1014	0.00320472	0.00512987	anno;
ABHD12_1	20:25378172:A:G:ABHD12:rs2387881	11.1014	0.00320472	0.00512987	anno;
ABHD12_1	20:25383287:A:G:ABHD12:rs2500417	11.1014	0.00320472	0.00512987	anno;
ABHD12_1	20:25387465:A:G:ABHD12:rs2482906	11.1014	0.0092887	0.00512987	anno;Promoter|
ABHD12_1	20:25390284:T:C:ABHD12:rs4815424	11.1014	0.00320472	0.00512987	anno;
ABHD12_1	20:25391969:C:T:ABHD12:rs2500424	11.1014	0.00320472	0.00512987	anno;
ABHD12_1	20:25392384:A:G:ABHD12:rs6083847	11.1014	0.00320472	0.00512987	anno;
ABHD12_1	20:25395528:T:C:ABHD12:rs2482911	11.1014	0.00320472	0.00512987	anno;
ABHD12_1	20:25405086:T:A:ABHD12:rs2482913	11.1014	0.00320472	0.00512987	anno;
ABHD12_1	20:25406366:G:C:ABHD12:rs2500436	11.1014	0.00320472	0.00512987	anno;
ABHD12_1	20:25407391:G:C:ABHD12:rs8113919	11.1014	0.00320472	0.00512987	anno;
ABHD12_1	20:25407585:C:T:ABHD12:rs6083856	11.1014	0.00320472	0.00512987	anno;
ABHD12_1	20:25414419:C:T:ABHD12:rs6050611	11.1014	0.00320472	0.00512987	anno;
ABHD12_1	20:25414539:T:G:ABHD12:rs6515651	11.1014	0.00320472	0.00512987	anno;
ABHD12_1	20:25415224:G:A:ABHD12:rs2387885	11.1014	0.00320472	0.00512987	anno;
ABHD12_1	20:25418482:T:C:ABHD12:rs2424713	11.1014	0.00320472	0.00512987	anno;
ABHD12_1	20:25423538:A:G:ABHD12:rs2424716	11.1013	0.00320051	0.00512314	anno;
ABHD12_1	20:25424708:G:C:ABHD12:rs6132833	11.1013	0.00320051	0.00512314	anno;
ABHD12_1	20:25424713:A:T:ABHD12:rs6037120	11.1013	0.00320051	0.00512314	anno;
ABHD12_1	20:25426968:A:G:ABHD12:rs761025	11.1013	0.00320051	0.00512314	anno;3_UTR|
ABHD12_1	20:25426234:T:C:ABHD12:rs6107044	11.1013	0.00319939	0.00512134	anno;
ABHD12_1	20:25334115:G:C:ABHD12:rs2482930	11.1013	0.00319868	0.0051202	anno;peak|
ABHD12_1	20:25267301:A:G:ABHD12:rs910997	11.1012	0.00319692	0.00511739	anno;
ABHD12_1	20:25303379:C:G:ABHD12:rs3002698	11.101	0.00319007	0.00510643	anno;
ABHD12_1	20:25266450:C:G:ABHD12:rs2257808	11.1006	0.0297587	0.00508557	anno;
ABHD12_1	20:25266513:G:A:ABHD12:rs2424700	11.1006	0.0297544	0.00508485	anno;
ABHD12_1	20:25266476:T:C:ABHD12:rs2257809	11.1006	0.0297511	0.00508429	anno;
ABHD12_1	20:25449818:C:T:ABHD12:rs367666	11.1005	0.00317318	0.00507939	anno;
ABHD12_1	20:25269630:G:A:ABHD12:rs2257982	11.1005	0.00317043	0.00507499	anno;
ABHD12_1	20:25278278:T:C:ABHD12:rs7019	11.1002	0.00316101	0.00505991	anno;3_UTR|DAR|peak|
ABHD12_1	20:25356497:A:G:ABHD12:rs2500401	11.1001	0.00315878	0.00505633	anno;
ABHD12_1	20:25339664:C:T:ABHD12:rs2500446	11.0993	0.00312977	0.0050099	anno;
ABHD12_1	20:25340786:A:G:ABHD12:rs2482937	11.0993	0.00312977	0.0050099	anno;
ABHD12_1	20:25341478:G:C:ABHD12:rs4815407	11.0993	0.00312977	0.0050099	anno;
ABHD12_1	20:25349830:C:T:ABHD12:rs2482940	11.0993	0.00312977	0.0050099	anno;
ABHD12_1	20:25350618:C:T:ABHD12:rs2027004	11.0993	0.00312977	0.0050099	anno;
ABHD12_1	20:25351071:G:A:ABHD12:rs6050566	11.0993	0.00312977	0.0050099	anno;
ABHD12_1	20:25380593:G:A:ABHD12:rs2482943	11.0925	0.00290347	0.00464766	anno;
ABHD12_1	20:25382268:C:T:ABHD12:rs2500418	11.0869	0.0027304	0.00437063	anno;
ABHD12_1	20:25441433:T:C:ABHD12:rs13038834	11.0854	0.00268656	0.00430044	anno;
ABHD12_1	20:25434667:G:A:ABHD12:rs6132835	11.0838	0.0026394	0.00422496	anno;
ABHD12_1	20:25350498:A:G:ABHD12:rs2027003	11.0833	0.00262567	0.00420298	anno;
ABHD12_1	20:25435067:T:C:ABHD12:rs7270835	11.0798	0.00252652	0.00404427	anno;
ABHD12_1	20:25435934:C:G:ABHD12:rs6138572	11.0798	0.00252545	0.00404255	anno;
ABHD12_1	20:25436827:T:C:ABHD12:rs11087520	11.0797	0.00252436	0.00404081	anno;
ABHD12_1	20:25435169:C:G:ABHD12:rs11699203	11.0797	0.00252418	0.00404053	anno;
ABHD12_1	20:25435388:G:A:ABHD12:rs6138571	11.0797	0.00252418	0.00404053	anno;
ABHD12_1	20:25439850:T:C:ABHD12:rs398036	11.0797	0.00252344	0.00403934	anno;Promoter|
ABHD12_1	20:25441936:A:G:ABHD12:rs6107045	11.0797	0.00252251	0.00403785	anno;peak|
ABHD12_1	20:25442049:A:G:ABHD12:rs6107046	11.0797	0.00252251	0.00403785	anno;peak|
ABHD12_1	20:25442097:A:G:ABHD12:rs6107047	11.0797	0.00252251	0.00403785	anno;peak|
ABHD12_1	20:25440187:A:C:ABHD12:rs397119	11.0797	0.00252236	0.0040376	anno;Promoter|
ABHD12_1	20:25440269:A:G:ABHD12:rs448396	11.0797	0.00252236	0.0040376	anno;Promoter|
ABHD12_1	20:25440478:T:C:ABHD12:rs6115191	11.0797	0.00252236	0.0040376	anno;Promoter|
ABHD12_1	20:25440593:A:G:ABHD12:rs453329	11.0797	0.00252236	0.0040376	anno;Promoter|
ABHD12_1	20:25440648:A:G:ABHD12:rs11087521	11.0797	0.00252236	0.0040376	anno;
ABHD12_1	20:25438868:C:T:ABHD12:rs416745	11.0797	0.0025222	0.00403735	anno;Promoter|peak|
ABHD12_1	20:25438928:C:G:ABHD12:rs454723	11.0797	0.0025222	0.00403735	anno;Promoter|peak|
ABHD12_1	20:25438952:A:G:ABHD12:rs6138575	11.0797	0.0025222	0.00403735	anno;Promoter|peak|
ABHD12_1	20:25444805:C:T:ABHD12:rs408853	11.0796	0.00252155	0.00403631	anno;CRE|peak|
ABHD12_1	20:25443510:T:C:ABHD12:rs447722	11.0796	0.00252143	0.00403611	anno;
ABHD12_1	20:25445591:C:T:ABHD12:rs422844	11.0796	0.0236084	0.00403452	anno;CRE|DAR|peak|
ABHD12_1	20:25445446:C:G:ABHD12:rs422424	11.0795	0.0235969	0.00403256	anno;CRE|DAR|peak|
ABHD12_1	20:25446308:G:C:ABHD12:rs401166	11.0774	0.00246021	0.00393813	anno;peak|
ABHD12_1	20:25263277:G:T:ABHD12:rs2261796	11.0706	0.00228357	0.00365537	anno;peak|
ABHD12_1	20:25447896:G:A:ABHD12:rs404394	11.0684	0.00222837	0.00356702	anno;
ABHD12_1	20:25373779:C:A:ABHD12:rs9679929	11.0676	0.00220813	0.00353462	anno;
ABHD12_1	20:25373782:C:A:ABHD12:rs59934506	11.0675	0.00220586	0.00353098	anno;
ABHD12_1	20:25449854:A:G:ABHD12:rs444699	11.06	0.00203226	0.0032531	anno;
ABHD12_1	20:25449879:G:C:ABHD12:rs35849893	11.0598	0.00202815	0.00324652	anno;
ABHD12_1	20:25265872:T:C:ABHD12:rs2257464	11.0587	0.0187784	0.00320912	anno;
ABHD12_1	20:25451180:T:C:ABHD12:rs449370	11.0573	0.00197244	0.00315734	anno;
ABHD12_1	20:25259910:G:A:ABHD12:rs2261698	11.0562	0.00194947	0.00312058	anno;peak|
ABHD12_1	20:25263648:A:G:ABHD12:rs2145126	11.0561	0.00194805	0.0031183	anno;peak|
ABHD12_1	20:25264196:G:A:ABHD12:rs910996	11.056	0.00194616	0.00311527	anno;
ABHD12_1	20:25264664:C:T:ABHD12:rs2257705	11.056	0.00194616	0.00311527	anno;
ABHD12_1	20:25264814:C:T:ABHD12:rs2227892	11.056	0.00194616	0.00311527	anno;Exon|
ABHD12_1	20:25264910:C:T:ABHD12:rs2257712	11.056	0.00194616	0.00311527	anno;
ABHD12_1	20:25265984:T:G:ABHD12:rs2257233	11.0559	0.0181987	0.00311005	anno;CRE|DAR|peak|
ABHD12_1	20:25263062:G:T:ABHD12:rs2261794	11.0558	0.00194052	0.00310625	anno;
ABHD12_1	20:25265554:G:A:ABHD12:rs2257461	11.0558	0.00194007	0.00310552	anno;
ABHD12_1	20:25262789:C:T:ABHD12:rs2261790	11.0557	0.00193985	0.00310517	anno;
ABHD12_1	20:25262291:A:G:ABHD12:rs2261753	11.0547	0.00191807	0.00307031	anno;peak|
ABHD12_1	20:25260931:G:A:ABHD12:rs2227890	11.0539	0.00190036	0.00304196	anno;Exon|peak|
ABHD12_1	20:25260641:G:T:ABHD12:rs2261720	11.0538	0.00189961	0.00304077	anno;
ABHD12_1	20:25259200:C:T:ABHD12:rs2261109	11.0538	0.00189867	0.00303926	anno;
ABHD12_1	20:25261784:A:G:ABHD12:rs2261747	11.0536	0.00189401	0.00303179	anno;
ABHD12_1	20:25317492:T:C:ABHD12:rs4815405	11.0505	0.00531001	0.00293257	anno;peak|
ABHD12_1	20:25449883:C:T:ABHD12:rs34507264	11.0494	0.00180922	0.00289608	anno;
ABHD12_1	20:25449887:G:T:ABHD12:rs11474838	11.0493	0.0018071	0.00289267	anno;
ABHD12_1	20:25404541:T:C:ABHD12:rs6083853	11.049	0.00180136	0.00288349	anno;
ABHD12_1	20:25324410:A:G:ABHD12:rs8125868	11.037	0.0015792	0.00252787	anno;
ABHD12_1	20:25326012:C:T:ABHD12:rs6050547	11.037	0.0015792	0.00252787	anno;
ABHD12_1	20:25327151:T:C:ABHD12:rs2482927	11.037	0.0015792	0.00252787	anno;
ABHD12_1	20:25329915:G:A:ABHD12:rs6050559	11.037	0.0015792	0.00252786	anno;
ABHD12_1	20:25331442:C:T:ABHD12:rs2500443	11.037	0.00457721	0.00252786	anno;CRE|DAR|peak|
ABHD12_1	20:25331530:A:G:ABHD12:rs2482928	11.037	0.00457721	0.00252786	anno;CRE|DAR|peak|
ABHD12_1	20:25411086:A:T:ABHD12:rs6083862	11.0345	0.0015364	0.00245936	anno;
ABHD12_1	20:25425943:A:G:ABHD12:rs6115185	11.0229	0.00135352	0.00216662	anno;
ABHD12_1	20:25282944:G:A:ABHD12:rs10966	11.0188	0.00129509	0.00207308	anno;Exon|peak|
ABHD12_1	20:25311544:T:A:ABHD12:rs6050535	11.0188	0.00129506	0.00207304	anno;
ABHD12_1	20:25314439:C:T:ABHD12:rs6050541	11.0181	0.00128457	0.00205625	anno;
ABHD12_1	20:25334855:C:T:ABHD12:rs6050561	11.0112	0.00345291	0.00190695	anno;
ABHD12_1	20:25343998:G:C:ABHD12:rs6083817	11.0112	0.0011913	0.00190695	anno;
ABHD12_1	20:25344231:G:A:ABHD12:rs6050564	11.0112	0.0011913	0.00190695	anno;
ABHD12_1	20:25346082:G:A:ABHD12:rs6083818	11.0112	0.0011913	0.00190695	anno;
ABHD12_1	20:25346697:C:A:ABHD12:rs4815409	11.0112	0.0011913	0.00190695	anno;
ABHD12_1	20:25347221:T:C:ABHD12:rs6037097	11.0112	0.0011913	0.00190695	anno;
ABHD12_1	20:25347563:T:G:ABHD12:rs6050565	11.0112	0.0011913	0.00190695	anno;
ABHD12_1	20:25348712:T:C:ABHD12:rs6076339	11.0112	0.0011913	0.00190695	anno;
ABHD12_1	20:25354561:C:T:ABHD12:rs6050567	11.0112	0.0011913	0.00190695	anno;
ABHD12_1	20:25356876:T:G:ABHD12:rs6037099	11.0112	0.0011913	0.00190695	anno;
ABHD12_1	20:25361701:A:G:ABHD12:rs4815414	11.0112	0.00345291	0.00190695	anno;
ABHD12_1	20:25363591:A:G:ABHD12:rs6107033	11.0112	0.0011913	0.00190695	anno;
ABHD12_1	20:25366424:T:C:ABHD12:rs6083825	11.0112	0.0011913	0.00190695	anno;
ABHD12_1	20:25366625:T:G:ABHD12:rs6083826	11.0112	0.0011913	0.00190695	anno;
ABHD12_1	20:25368373:A:G:ABHD12:rs34645895	11.0112	0.0011913	0.00190695	anno;peak|
ABHD12_1	20:25369918:T:C:ABHD12:rs6083828	11.0112	0.0011913	0.00190695	anno;peak|
ABHD12_1	20:25374199:C:A:ABHD12:rs6037105	11.0112	0.0011913	0.00190695	anno;peak|
ABHD12_1	20:25376118:G:T:ABHD12:rs6050583	11.0112	0.0011913	0.00190695	anno;
ABHD12_1	20:25377787:T:C:ABHD12:rs2387880	11.0112	0.0011913	0.00190695	anno;
ABHD12_1	20:25378802:C:T:ABHD12:rs2387882	11.0112	0.0011913	0.00190695	anno;
ABHD12_1	20:25379004:T:C:ABHD12:rs2387883	11.0112	0.0011913	0.00190695	anno;
ABHD12_1	20:25379069:C:T:ABHD12:rs2387884	11.0112	0.0011913	0.00190695	anno;
ABHD12_1	20:25379526:C:T:ABHD12:rs4815417	11.0112	0.00345291	0.00190695	anno;
ABHD12_1	20:25381895:T:G:ABHD12:rs6076345	11.0112	0.0011913	0.00190695	anno;
ABHD12_1	20:25386465:G:T:ABHD12:rs4813566	11.0112	0.0011913	0.00190695	anno;
ABHD12_1	20:25386509:G:A:ABHD12:rs4815421	11.0112	0.0011913	0.00190695	anno;
ABHD12_1	20:25386832:C:T:ABHD12:rs6083844	11.0112	0.0011913	0.00190695	anno;peak|
ABHD12_1	20:25388070:G:A:ABHD12:rs3761117	11.0112	0.00345291	0.00190695	anno;Promoter|peak|
ABHD12_1	20:25388133:C:T:ABHD12:rs8123949	11.0112	0.00345291	0.00190695	anno;Promoter|peak|
ABHD12_1	20:25392529:A:G:ABHD12:rs6076346	11.0112	0.0011913	0.00190695	anno;
ABHD12_1	20:25392974:G:A:ABHD12:rs6050595	11.0112	0.0011913	0.00190695	anno;
ABHD12_1	20:25395878:G:A:ABHD12:rs2184000	11.0112	0.0011913	0.00190695	anno;
ABHD12_1	20:25398876:G:C:ABHD12:rs4815425	11.0112	0.0011913	0.00190695	anno;
ABHD12_1	20:25400240:T:C:ABHD12:rs6050599	11.0112	0.0011913	0.00190695	anno;
ABHD12_1	20:25400873:G:A:ABHD12:rs6050600	11.0112	0.0011913	0.00190695	anno;
ABHD12_1	20:25401203:A:G:ABHD12:rs6050602	11.0112	0.0011913	0.00190695	anno;
ABHD12_1	20:25405118:A:G:ABHD12:rs6083855	11.0112	0.0011913	0.00190695	anno;
ABHD12_1	20:25405186:A:C:ABHD12:rs4815426	11.0112	0.0011913	0.00190695	anno;
ABHD12_1	20:25410259:G:A:ABHD12:rs6115182	11.0112	0.0011913	0.00190695	anno;
ABHD12_1	20:25411751:A:G:ABHD12:rs6050609	11.0112	0.0011913	0.00190695	anno;
ABHD12_1	20:25416375:T:C:ABHD12:rs6115183	11.0112	0.0011913	0.00190695	anno;
ABHD12_1	20:25416942:C:T:ABHD12:rs2424712	11.0112	0.0011913	0.00190695	anno;
ABHD12_1	20:25418681:G:T:ABHD12:rs2424714	11.0112	0.0011913	0.00190695	anno;
ABHD12_1	20:25420077:G:A:ABHD12:rs2424715	11.0111	0.00119052	0.00190571	anno;
ABHD12_1	20:25421648:T:C:ABHD12:rs6050617	11.0111	0.00119052	0.00190571	anno;
ABHD12_1	20:25427081:T:G:ABHD12:rs2387887	11.0111	0.00118975	0.00190447	anno;3_UTR|
ABHD12_1	20:25427836:C:T:ABHD12:rs6050623	11.0111	0.00118975	0.00190447	anno;3_UTR|
ABHD12_1	20:25428311:A:G:ABHD12:rs6037121	11.0111	0.00118975	0.00190447	anno;3_UTR|
ABHD12_1	20:25430680:A:G:ABHD12:rs6050629	11.011	0.00118897	0.00190321	anno;
ABHD12_1	20:25430745:G:A:ABHD12:rs6050630	11.011	0.00118897	0.00190321	anno;
ABHD12_1	20:25432601:G:A:ABHD12:rs6050632	11.011	0.00118897	0.00190321	anno;
ABHD12_1	20:25433536:C:T:ABHD12:rs2856	11.0109	0.00118774	0.00190125	anno;3_UTR|
ABHD12_1	20:25393036:A:T:ABHD12:rs369592217	11.0108	0.00118629	0.00189893	anno;
ABHD12_1	20:25397257:G:C:ABHD12:rs6050598	11.0107	0.00118497	0.00189681	anno;
ABHD12_1	20:25428786:C:T:ABHD12:rs1047171	11.0107	0.00118456	0.00189616	anno;3_UTR|
ABHD12_1	20:25428261:C:T:ABHD12:rs6050626	11.0106	0.00118365	0.00189471	anno;3_UTR|
ABHD12_1	20:25372890:G:A:ABHD12:rs6115167	11.0078	0.00114811	0.00183782	anno;peak|
ABHD12_1	20:25372891:C:A:ABHD12:rs6115168	11.0078	0.00114811	0.00183782	anno;peak|
ABHD12_1	20:25339829:G:A:ABHD12:rs6037096	11.006	0.00112533	0.00180136	anno;
ABHD12_1	20:25341316:C:G:ABHD12:rs4815406	11.006	0.00112533	0.00180136	anno;
ABHD12_1	20:25342457:G:A:ABHD12:rs8113968	11.006	0.00112533	0.00180136	anno;
ABHD12_1	20:25343455:C:T:ABHD12:rs6050563	11.006	0.00112533	0.00180136	anno;
ABHD12_1	20:25350223:A:G:ABHD12:rs4815411	11.006	0.00112533	0.00180136	anno;
ABHD15_1	17:27895528:T:C:ABHD15:rs497993	12.1698	0.57155	0.33412	anno;Promoter|DAR|peak|
ABHD15_1	17:27898828:T:C:ABHD15:rs565977	12.1552	0.15646	0.263974	anno;
ABHD15_1	17:27897131:C:T:ABHD15:rs62070807	12.1233	0.117483	0.203667	anno;
ABHD15_1	17:27897585:T:C:ABHD15:rs8081275	12.1211	0.114436	0.1986	anno;peak|
ABHD16A_1	6:31578465:A:G:ABHD16A:rs150043706	4.98225	0.110108	0.393756	anno;
ABHD16A_1	6:31444753:G:C:ABHD16A:rs115793853	4.7551	0.0618927	0.20136	anno;
ABHD16A_1	6:31823003:A:G:ABHD16A:rs554854300	4.66813	0.106942	0.136662	anno;
ABHD16A_1	6:31682213:C:G:ABHD16A:rs11575850	4.56385	0.766404	0.12725	anno;Promoter|
ABHD16A_1	6:31606813:G:A:ABHD16A:rs115247800	4.52434	0.0276926	0.103622	anno;3_UTR|peak|
ABHD16A_1	6:31737279:A:G:ABHD16A:rs116311752	4.49285	0.0255618	0.0956626	anno;
ABHD16A_1	6:31694859:T:C:ABHD16A:rs45565837	4.48959	0.025353	0.0948833	anno;3_UTR|
ABHD16A_1	6:31787120:T:G:ABHD16A:rs190263387	4.4826	0.0249123	0.093238	anno;peak|
ABHD17A_1	19:1889716:G:C:ABHD17A:rs9749385	-5.57845	0.0125577	0.108571	anno;
ABHD17A_1	19:1880557:T:C:ABHD17A:rs10410369	-5.51995	0.00917638	0.0793398	anno;
ABHD17A_1	19:1880950:T:C:ABHD17A:rs4807160	-5.49202	0.22827	0.068381	anno;Promoter|peak|
ABHD17A_1	19:1879687:A:G:ABHD17A:rs7249096	-5.47717	0.00731026	0.0632069	anno;
ABHD17A_1	19:1885948:G:C:ABHD17A:rs10414095	-5.46386	0.196659	0.0589124	anno;Promoter|
ABHD17A_1	19:1879197:T:C:ABHD17A:rs11084915	-5.46303	0.00678387	0.0586561	anno;
ABHD17A_1	19:1880586:A:C:ABHD17A:rs4807159	-5.46129	0.00672178	0.0581192	anno;
ABHD17A_1	19:1878507:C:T:ABHD17A:rs10402026	-5.46113	0.00671621	0.0580711	anno;
ABHD17A_1	19:1882762:G:A:ABHD17A:rs3810416	-5.46042	0.193117	0.0578516	anno;Promoter|peak|
ABHD17A_1	19:1880523:G:A:ABHD17A:rs12461295	-5.45995	0.0066745	0.0577105	anno;
ABHD17A_1	19:1883433:C:T:ABHD17A:rs1610107	-5.45854	0.00662497	0.0572823	anno;peak|
ABHD17A_1	19:1884552:G:A:ABHD17A:rs7246402	-5.45429	0.186978	0.0560127	anno;Promoter|peak|
ABHD17A_1	19:1876009:T:C:ABHD17A:rs8607	-5.43379	0.0544765	0.0502877	anno;peak|
ABHD17A_1	19:1876566:A:G:ABHD17A:rs10414308	-5.4302	0.0534582	0.0493478	anno;peak|
ABHD17A_1	19:1893842:A:T:ABHD17A:rs11084916	-5.39847	0.0048341	0.0417992	anno;
ABHD17A_1	19:1886899:T:C:ABHD17A:rs8113280	-5.28648	0.00271152	0.0234475	anno;peak|
ABHD17A_1	19:1874017:G:A:ABHD17A:rs10422110	-5.20019	0.00507553	0.0151433	anno;CRE|DAR|peak|
ABHD17C_1	15:81043546:T:A:ABHD17C:rs7175754	6.1133	0.160924	0.349855	anno;
ABHD17C_1	15:81006007:T:G:ABHD17C:rs141138337	5.96599	0.0654975	0.158066	anno;
ABHD17C_1	15:81004997:A:C:ABHD17C:rs75615067	5.99342	0.018365	0.0362978	anno;peak|
ABHD17C_1	15:80995226:T:A:ABHD17C:rs75839672	5.9943	0.170199	0.0353337	anno;CRE|peak|
ABHD17C_1	15:80995623:C:G:ABHD17C:rs77919991	5.99284	0.169178	0.0351459	anno;peak|
ABHD17C_1	15:81017936:T:C:ABHD17C:rs74589631	5.96975	0.017524	0.0336283	anno;peak|
ABHD17C_1	15:81018433:C:G:ABHD17C:rs142960579	5.97422	0.0171237	0.0324435	anno;
ABHD17C_1	15:81012503:T:G:ABHD17C:rs78621755	5.98052	0.0163835	0.0313341	anno;
ABHD17C_1	15:81020429:C:G:ABHD17C:rs76706049	5.95147	0.135436	0.0282051	anno;peak|
ABHD17C_1	15:81021903:G:A:ABHD17C:rs74438474	5.93598	0.0134052	0.0262411	anno;
ABHD17C_1	15:81024081:C:T:ABHD17C:rs76043009	5.92309	0.0127246	0.0250594	anno;
ABHD17C_1	15:81024964:G:A:ABHD17C:rs80188222	5.91972	0.12021	0.0249798	anno;CRE|DAR|peak|
ABHD17C_1	15:81028593:T:C:ABHD17C:rs77965151	5.89454	0.011346	0.0226424	anno;
ABHD17C_1	15:81030150:A:G:ABHD17C:rs75604867	5.88519	0.01093	0.0219063	anno;peak|
ABHD17C_1	15:81031181:T:A:ABHD17C:rs78854728	5.87961	0.0106897	0.0214795	anno;
ABHD17C_1	15:81041332:T:C:ABHD17C:rs76097222	5.83175	0.00884941	0.0181709	anno;
ABHD17C_1	15:81068363:G:T:ABHD17C:rs78024697	5.66254	0.00771459	0.0177854	anno;
ABHD17C_1	15:81063104:T:C:ABHD17C:rs79269972	5.62833	0.00676825	0.015808	anno;
ABHD17C_1	15:81053651:A:T:ABHD17C:rs142902847	5.62864	0.00641945	0.0151889	anno;
ABHD17C_1	15:81055082:A:G:ABHD17C:rs140084585	5.61789	0.00618549	0.0144419	anno;
ABHD17C_1	15:81056803:C:G:ABHD17C:rs79479788	5.60018	0.00578733	0.0136009	anno;
ABHD17C_1	15:81002463:A:C:ABHD17C:rs78884292	5.53942	0.00365476	0.00772382	anno;CRE|peak|
ABHD17C_1	15:81065816:A:G:ABHD17C:rs78465413	5.36349	0.00283538	0.00668118	anno;
ABHD17C_1	15:81064062:T:C:ABHD17C:rs12440422	5.33904	0.0026111	0.0061954	anno;
ABHD2_1	15:89698044:G:A:ABHD2:rs12101898	4.42767	0.103812	0.133395	anno;
ABHD2_1	15:89686484:G:A:ABHD2:rs16942758	4.39129	0.0892132	0.114641	anno;
ABHD2_1	15:89691345:A:G:ABHD2:rs146189546	4.37373	0.0829572	0.106605	anno;
ABHD2_1	15:89706770:C:A:ABHD2:rs8028123	4.32087	0.193518	0.0858034	anno;DAR|peak|
ABHD2_1	15:89689583:T:G:ABHD2:rs4932475	4.31592	0.0654321	0.0840896	anno;
ABHD2_1	15:89699247:A:G:ABHD2:rs28503568	4.30442	0.0624381	0.0802429	anno;CRE|DAR|peak|
ABHD2_1	15:89701479:C:A:ABHD2:rs28392758	4.25014	0.14533	0.0644426	anno;CRE|DAR|peak|
ABHD2_1	15:89753349:A:C:ABHD2:rs834	4.05617	0.0234236	0.0301115	anno;3_UTR|
ABHD2_1	15:89714860:C:T:ABHD2:rs10852117	4.05432	0.0232583	0.029899	anno;peak|
ABHD2_1	15:89715940:C:T:ABHD2:rs6496559	4.03116	0.0212899	0.0273693	anno;peak|
ABHD2_1	15:89715539:T:C:ABHD2:rs8028119	4.03021	0.0212126	0.02727	anno;
ABHD2_1	15:89715077:C:A:ABHD2:rs4932210	4.02743	0.0209894	0.0269832	anno;peak|
ABHD2_1	15:89744004:C:T:ABHD2:rs7179900	4.02145	0.0205178	0.0263771	anno;3_UTR|
ABHD2_1	15:89744476:G:T:ABHD2:rs6416547	4.01805	0.0202542	0.0260382	anno;3_UTR|peak|
ABHD2_1	15:89735897:G:A:ABHD2:rs4932213	4.00595	0.0193463	0.0248714	anno;
ABHD2_1	15:89737643:A:G:ABHD2:rs6496563	3.99827	0.0187929	0.0241601	anno;
ABHD2_1	15:89755962:C:T:ABHD2:rs28593051	3.99291	0.0184164	0.0236763	anno;
ABHD2_1	15:89718913:T:C:ABHD2:rs1005399	3.97184	0.0170127	0.0218721	anno;peak|
ABHD4_1	14:23099619:C:T:ABHD4:rs1681589	-6.21477	0.038723	0.0544313	anno;
ABHD4_1	14:23099685:G:T:ABHD4:rs11846129	-6.21359	0.0384464	0.0540424	anno;
ABHD4_1	14:23099874:T:C:ABHD4:rs544918239	-6.08925	0.0182834	0.0256976	anno;
ABHD4_1	14:23099875:G:A:ABHD4:rs561252871	-6.08925	0.0182834	0.0256976	anno;
ABHD4_1	14:23099876:G:C:ABHD4:rs530084556	-6.08917	0.0182756	0.0256867	anno;
ABHD4_1	14:23099885:G:A:ABHD4:rs374993468	-6.08904	0.0182607	0.0256657	anno;
ABHD4_1	14:23099196:A:G:ABHD4:rs8006456	-6.05272	0.0427211	0.0207157	anno;
ABHD4_1	14:23099390:G:A:ABHD4:rs1753458	-6.00481	0.0111321	0.0156453	anno;
ABHD4_1	14:23109529:G:C:ABHD4:rs148656069	-6.00218	0.0109625	0.0154069	anno;
ABHD4_1	14:23099742:G:A:ABHD4:rs11845237	-5.96669	0.00891815	0.0125334	anno;
ABHD4_1	14:23113484:C:T:ABHD4:rs35137509	-5.96346	0.0819847	0.0123008	anno;DAR|peak|
ABHD4_1	14:23099849:A:G:ABHD4:rs73599383	-5.957	0.00843143	0.0118493	anno;
ABHD4_1	14:23099998:C:G:ABHD4:rs116690419	-5.95321	0.00824835	0.0115919	anno;
ABHD4_1	14:23099641:C:T:ABHD4:rs1681590	-5.95282	0.00822978	0.0115658	anno;
ABHD4_1	14:23099728:A:G:ABHD4:rs11848984	-5.95066	0.0081275	0.0114221	anno;
ABHD4_1	14:23099765:G:T:ABHD4:rs34321490	-5.94971	0.00808299	0.0113595	anno;
ABHD4_1	14:23099798:C:T:ABHD4:rs149564058	-5.94889	0.00804496	0.0113061	anno;
ABHD4_1	14:23104042:C:T:ABHD4:rs1681583	-5.94168	0.00771652	0.0108444	anno;
ABHD4_1	14:23104043:A:G:ABHD4:rs1628360	-5.94168	0.00771652	0.0108444	anno;
ABHD4_1	14:23100023:G:T:ABHD4:rs117737073	-5.93522	0.00743418	0.0104476	anno;
ABHD4_1	14:23100053:C:T:ABHD4:rs141914619	-5.93452	0.00740453	0.0104059	anno;
ABHD4_1	14:23109335:G:T:ABHD4:rs72679830	-5.93433	0.00739636	0.0103944	anno;
ABHD4_1	14:23100614:G:C:ABHD4:rs11844200	-5.92822	0.0206954	0.0100343	anno;
ABHD4_1	14:23100094:C:T:ABHD4:rs147222560	-5.92621	0.00705827	0.00991923	anno;
ABHD4_1	14:23100698:C:G:ABHD4:rs11852206	-5.92606	0.0204402	0.0099106	anno;
ABHD4_1	14:23104000:G:A:ABHD4:rs1628239	-5.92602	0.00705035	0.0099081	anno;
ABHD4_1	14:23104007:A:G:ABHD4:rs1628267	-5.9259	0.00704571	0.00990157	anno;
ABHD4_1	14:23100135:G:A:ABHD4:rs145317362	-5.9251	0.00701322	0.00985591	anno;
ABHD4_1	14:23100765:G:A:ABHD4:rs1681591	-5.9243	0.0202334	0.00981031	anno;
ABHD4_1	14:23100171:C:T:ABHD4:rs150950364	-5.92427	0.00697951	0.00980854	anno;
ABHD4_1	14:23100205:A:G:ABHD4:rs113110160	-5.92329	0.00694033	0.00975347	anno;
ABHD4_1	14:23100248:G:A:ABHD4:rs72679812	-5.92231	0.0069013	0.0096986	anno;
ABHD4_1	14:23100291:G:A:ABHD4:rs72679813	-5.92118	0.00685683	0.00963611	anno;
ABHD4_1	14:23100909:G:A:ABHD4:rs1753425	-5.92056	0.0198028	0.00960149	anno;
ABHD4_1	14:23100342:T:C:ABHD4:rs139854525	-5.91992	0.00680702	0.00956609	anno;
ABHD4_1	14:23100387:T:C:ABHD4:rs145489636	-5.91865	0.00675744	0.00949641	anno;
ABHD4_1	14:23100417:A:G:ABHD4:rs148665102	-5.91794	0.0195065	0.00945782	anno;
ABHD4_1	14:23101070:C:T:ABHD4:rs1681592	-5.91631	0.00666731	0.00936973	anno;
ABHD4_1	14:23101118:G:T:ABHD4:rs1753426	-5.91498	0.00661667	0.00929855	anno;
ABHD4_1	14:23100545:C:T:ABHD4:rs11849302	-5.91467	0.0191431	0.00928159	anno;
ABHD4_1	14:23100571:A:G:ABHD4:rs11852162	-5.91395	0.0190646	0.00924354	anno;
ABHD4_1	14:23100522:G:A:ABHD4:rs11848414	-5.91373	0.0190398	0.00923151	anno;
ABHD4_1	14:23101169:G:A:ABHD4:rs66727569	-5.91365	0.00656628	0.00922773	anno;
ABHD4_1	14:23101199:A:G:ABHD4:rs112618900	-5.91222	0.00651225	0.00915179	anno;
ABHD4_1	14:23101205:A:G:ABHD4:rs113793111	-5.91207	0.0065067	0.00914399	anno;
ABHD4_1	14:23101226:G:A:ABHD4:rs111609908	-5.91147	0.00648455	0.00911286	anno;
ABHD4_1	14:23101255:A:G:ABHD4:rs112710050	-5.91073	0.00645692	0.00907402	anno;
ABHD4_1	14:23101295:A:G:ABHD4:rs113552745	-5.91039	0.00644414	0.00905606	anno;
ABHD4_1	14:23101342:A:G:ABHD4:rs111563779	-5.90904	0.00639461	0.00898644	anno;
ABHD4_1	14:23101674:C:T:ABHD4:rs67119608	-5.90828	0.00636685	0.00894743	anno;
ABHD4_1	14:23101379:G:A:ABHD4:rs111275667	-5.90814	0.00636173	0.00894024	anno;
ABHD4_1	14:23101689:G:C:ABHD4:rs67151628	-5.90783	0.00635013	0.00892393	anno;
ABHD4_1	14:23101435:G:C:ABHD4:rs113167695	-5.90664	0.00630718	0.00886356	anno;
ABHD4_1	14:23101750:A:G:ABHD4:rs67435807	-5.90614	0.00628912	0.00883818	anno;
ABHD4_1	14:23101456:A:G:ABHD4:rs112348693	-5.90604	0.00628543	0.008833	anno;
ABHD4_1	14:23101757:G:C:ABHD4:rs67207355	-5.90599	0.00628358	0.0088304	anno;
ABHD4_1	14:23101465:T:C:ABHD4:rs112854205	-5.90574	0.00627458	0.00881774	anno;
ABHD4_1	14:23101624:G:C:ABHD4:rs60216077	-5.90151	0.00612402	0.00860613	anno;
ABHD4_1	14:23101812:T:G:ABHD4:rs66934255	-5.89632	0.00594445	0.00835375	anno;
ABHD4_1	14:23101852:C:A:ABHD4:rs72679819	-5.89524	0.00590794	0.00830243	anno;
ABHD4_1	14:23101902:G:A:ABHD4:rs66909785	-5.89385	0.00586121	0.00823675	anno;
ABHD4_1	14:23102014:G:C:ABHD4:rs1753428	-5.89076	0.00575826	0.00809206	anno;
ABHD4_1	14:23102626:A:G:ABHD4:rs11846290	-5.88862	0.00568826	0.00799367	anno;
ABHD4_1	14:23104316:G:A:ABHD4:rs11157710	-5.88714	0.00564021	0.00792615	anno;
ABHD4_1	14:23102192:T:C:ABHD4:rs11846400	-5.88577	0.00559615	0.00786421	anno;
ABHD4_1	14:23103040:T:C:ABHD4:rs3829405	-5.88373	0.0055313	0.00777306	anno;
ABHD4_1	14:23103355:T:C:ABHD4:rs3751484	-5.88343	0.00552195	0.00775993	anno;
ABHD4_1	14:23099645:T:C:ABHD4:rs8008424	-5.88236	0.00548821	0.00771251	anno;
ABHD4_1	14:23102316:T:C:ABHD4:rs1681593	-5.88231	0.00548654	0.00771017	anno;
ABHD4_1	14:23102317:T:C:ABHD4:rs1681594	-5.88215	0.00548158	0.0077032	anno;
ABHD4_1	14:23102439:A:C:ABHD4:rs1681595	-5.87773	0.00534468	0.00751078	anno;
ABHD4_1	14:23104883:T:G:ABHD4:rs1681585	-5.87589	0.00528881	0.00743226	anno;
ABHD4_1	14:23104648:A:G:ABHD4:rs1753431	-5.87533	0.00527199	0.00740862	anno;
ABHD4_1	14:23104545:A:G:ABHD4:rs1681584	-5.87527	0.00527036	0.00740633	anno;
ABHD4_1	14:23104534:G:T:ABHD4:rs1632549	-5.87512	0.00526571	0.00739979	anno;
ABHD4_1	14:23104464:G:A:ABHD4:rs1631791	-5.87494	0.00526044	0.00739238	anno;
ABHD4_1	14:23103743:T:C:ABHD4:rs56305436	-5.87123	0.00515025	0.00723751	anno;
ABHD4_1	14:23103347:C:T:ABHD4:rs3751482	-5.86864	0.00507448	0.00713102	anno;
ABHD4_1	14:23103354:G:A:ABHD4:rs3751483	-5.86858	0.00507285	0.00712874	anno;
ABHD4_1	14:23102882:A:C:ABHD4:rs1681596	-5.86834	0.0050659	0.00711897	anno;
ABHD4_1	14:23102896:G:A:ABHD4:rs1681597	-5.86827	0.00506391	0.00711617	anno;
ABHD4_1	14:23103282:C:T:ABHD4:rs3751481	-5.86821	0.00506223	0.00711381	anno;
ABHD4_1	14:23102784:G:A:ABHD4:rs1753429	-5.86614	0.00500265	0.00703007	anno;
ABHD4_1	14:23101954:G:C:ABHD4:rs56108058	-5.85434	0.00467776	0.00657345	anno;
ABHD4_1	14:23101965:G:A:ABHD4:rs57345974	-5.85403	0.00466952	0.00656188	anno;
ABHD4_1	14:23101977:C:T:ABHD4:rs1753427	-5.85357	0.00465718	0.00654453	anno;
ABHD6_1	3:58269712:G:T:ABHD6:rs3773008	10.8124	0.0437654	0.110016	anno;
ABHD6_1	3:58269511:A:C:ABHD6:rs3773005	10.8116	0.125518	0.109078	anno;
ABHD6_1	3:58271866:A:C:ABHD6:rs9826898	10.811	0.0431655	0.108449	anno;
ABHD6_1	3:58278901:T:C:ABHD6:rs2056121	10.8066	0.11576	0.0994394	anno;peak|
ABHD6_1	3:58277658:T:C:ABHD6:rs1123976	10.8059	0.114968	0.0987312	anno;
ABHD6_1	3:58263151:G:T:ABHD6:rs4681834	10.7652	0.081126	0.0691281	anno;
ABHD6_1	3:58240217:T:C:ABHD6:rs12715528	10.7067	0.0202404	0.0525022	anno;CRE|DAR|peak|
ABHD6_1	3:58240486:G:A:ABHD6:rs9854917	10.7071	0.0193229	0.0507355	anno;
ABHD6_1	3:58243898:A:G:ABHD6:rs13091746	10.7122	0.019283	0.0501687	anno;
ABHD6_1	3:58239380:T:C:ABHD6:rs9311672	10.7053	0.17631	0.0498498	anno;CRE|DAR|peak|
ABHD6_1	3:58239102:T:C:ABHD6:rs2037122	10.7047	0.175381	0.0495683	anno;CRE|DAR|peak|
ABHD6_1	3:58241059:C:A:ABHD6:rs2037124	10.7081	0.0185777	0.0482064	anno;
ABHD6_1	3:58237003:A:C:ABHD6:rs4681832	10.6964	0.0175404	0.0457327	anno;
ABHD6_1	3:58276016:T:G:ABHD6:rs6781836	10.6928	0.0586756	0.0359365	anno;
ABI1_1	10:27031214:G:A:ABI1:rs10764638	-5.18985	0.0343797	0.0821019	anno;
ABI1_1	10:27045387:T:C:ABI1:rs1031858	-5.14557	0.0276031	0.0659095	anno;
ABI1_1	10:27034320:G:A:ABI1:rs10741117	-5.13427	0.0261077	0.0623366	anno;
ABI1_1	10:27038983:T:C:ABI1:rs7078227	-5.09906	0.0219636	0.0524361	anno;
ABI1_1	10:27038969:T:C:ABI1:rs7078119	-5.09904	0.0219622	0.0524327	anno;
ABI1_1	10:27047739:A:G:ABI1:rs1998632	-5.09764	0.0218121	0.0520742	anno;
ABI1_1	10:27047820:G:A:ABI1:rs1998631	-5.0936	0.0213853	0.0510546	anno;
ABI1_1	10:27047593:A:G:ABI1:rs1998634	-5.09291	0.199638	0.0508829	anno;peak|
ABI1_1	10:27039517:G:T:ABI1:rs2368184	-5.08614	0.0597659	0.0492265	anno;
ABI1_1	10:27039844:G:C:ABI1:rs10764639	-5.08614	0.02062	0.0492265	anno;
ABI1_1	10:27044049:T:C:ABI1:rs2368185	-5.08614	0.02062	0.0492265	anno;
ABI1_1	10:27037893:G:C:ABI1:rs3802612	-4.95877	0.0323545	0.0266385	anno;
ABI1_1	10:27150873:G:A:ABI1:rs2031562	-4.84408	0.187894	0.0155297	anno;Promoter|
ABI1_1	10:27143872:C:G:ABI1:rs1409130	-4.83467	0.00623141	0.014865	anno;
ABI1_1	10:27141301:G:A:ABI1:rs7895559	-4.83073	0.00611865	0.0145959	anno;
ABI1_1	10:27141178:G:A:ABI1:rs7895417	-4.83055	0.00611363	0.0145839	anno;
ABI1_1	10:27072989:T:G:ABI1:rs10829064	-4.8268	0.00600826	0.0143324	anno;
ABI1_1	10:27131645:G:A:ABI1:rs4376804	-4.81392	0.0530243	0.0135032	anno;peak|
ABI1_1	10:27130625:T:G:ABI1:rs4749192	-4.81206	0.0525723	0.013388	anno;
ABI1_1	10:27126690:T:G:ABI1:rs12221102	-4.80491	0.00543036	0.012953	anno;
ABI1_1	10:27030431:A:C:ABI1:rs7918403	-4.79967	0.0153641	0.0126438	anno;peak|
ABI1_1	10:27119145:T:A:ABI1:rs2148110	-4.79922	0.00528998	0.0126179	anno;
ABI1_1	10:27102668:T:C:ABI1:rs4749185	-4.79297	0.00513998	0.0122599	anno;
ABI1_1	10:27069902:T:G:ABI1:rs10764641	-4.78822	0.014576	0.0119948	anno;peak|
ABI1_1	10:27102957:A:G:ABI1:rs3916988	-4.78618	0.00498211	0.0118831	anno;
ABI1_1	10:27101718:C:T:ABI1:rs10829071	-4.78602	0.00497852	0.0118746	anno;
ABI1_1	10:27099870:A:G:ABI1:rs1543849	-4.78592	0.00497617	0.011869	anno;
ABI1_1	10:27096068:A:T:ABI1:rs1542553	-4.78566	0.00497022	0.0118548	anno;
ABI1_1	10:27094095:C:G:ABI1:rs10764643	-4.78551	0.0143959	0.0118465	anno;peak|
ABI1_1	10:27085818:G:A:ABI1:rs10741121	-4.78522	0.014377	0.0118309	anno;
ABI1_1	10:27075473:T:C:ABI1:rs10741119	-4.78497	0.0049546	0.0118175	anno;
ABI1_1	10:27071565:T:A:ABI1:rs10829063	-4.78471	0.0143434	0.0118033	anno;
ABI1_1	10:27070605:C:G:ABI1:rs6482575	-4.78466	0.0143401	0.0118006	anno;
ABI1_1	10:27071250:G:A:ABI1:rs1590445	-4.78466	0.00494753	0.0118006	anno;peak|
ABI1_1	10:27070290:T:C:ABI1:rs7907630	-4.78461	0.0143365	0.0117976	anno;
ABI1_1	10:27102522:C:T:ABI1:rs4747575	-4.78312	0.00491268	0.0117174	anno;
ABI1_1	10:27151681:G:A:ABI1:rs2505969	-4.768	0.0045838	0.0109325	anno;
ABI2_2	2:204866973:G:A:ABI2:rs139144717	-4.09912	0.981047	0.981047	anno;
ABI2_1	2:204727133:A:G:ABI2:rs56182719	-4.11477	0.515581	0.515581	anno;
ABI2_1	2:204749795:A:G:ABI2:rs72941427	-4.09731	0.489085	0.489085	anno;
ABI3BP_1	3:100625703:A:G:ABI3BP:rs17398137	-8.01861	0.845094	0.363662	anno;CRE|DAR|peak|
ABI3BP_1	3:100627655:C:T:ABI3BP:rs142287284	-7.99708	0.0609633	0.242403	anno;
ABI3BP_1	3:100650929:A:G:ABI3BP:rs9843102	-7.94577	0.0385295	0.150695	anno;
ABI3BP_2	3:100716820:C:T:ABI3BP:rs2595908	4.97926	0.0467614	0.0514633	anno;
ABI3BP_2	3:100716877:G:A:ABI3BP:rs2713799	4.97579	0.132859	0.050606	anno;
ABI3BP_2	3:100718249:G:A:ABI3BP:rs2713800	4.95468	0.0414972	0.0457089	anno;
ABI3BP_2	3:100719420:C:T:ABI3BP:rs6769529	4.9507	0.0407054	0.0448428	anno;
ABI3BP_2	3:100722280:A:G:ABI3BP:rs13059921	4.94079	0.0411071	0.0444818	anno;
ABI3BP_2	3:100722321:A:C:ABI3BP:rs13061221	4.94068	0.0410855	0.0444586	anno;
ABI3BP_2	3:100720874:T:C:ABI3BP:rs13097148	4.94449	0.039504	0.0435284	anno;
ABI3BP_2	3:100725741:C:A:ABI3BP:rs7616582	4.92853	0.0387484	0.0419502	anno;
ABI3BP_2	3:100724043:T:C:ABI3BP:rs150245477	4.93452	0.0376555	0.0415053	anno;
ABI3BP_2	3:100726361:C:A:ABI3BP:rs4586854	4.92624	0.0383236	0.0414941	anno;
ABI3BP_2	3:100726485:A:G:ABI3BP:rs4575930	4.92579	0.0382412	0.0414056	anno;
ABI3BP_2	3:100724410:G:A:ABI3BP:rs116549134	4.93331	0.0374368	0.041266	anno;
ABI3BP_2	3:100724314:G:A:ABI3BP:rs146057537	4.93316	0.0374092	0.0412357	anno;
ABI3BP_2	3:100728349:G:T:ABI3BP:rs2873448	4.91903	0.0370188	0.0400928	anno;
ABI3BP_1	3:100639697:T:C:ABI3BP:rs9847485	-7.77052	0.0109387	0.0397692	anno;
ABI3BP_2	3:100730963:G:A:ABI3BP:rs13062274	4.91628	0.0365348	0.0395729	anno;
ABI3BP_2	3:100733523:A:T:ABI3BP:rs13079773	4.91539	0.0363803	0.039407	anno;
ABI3BP_2	3:100732377:C:T:ABI3BP:rs1449320	4.9148	0.0362777	0.0392968	anno;
ABI3BP_2	3:100729651:C:T:ABI3BP:rs1449302	4.91435	0.0361997	0.0392129	anno;
ABI3BP_2	3:100730492:T:C:ABI3BP:rs16843148	4.91429	0.0361889	0.0392013	anno;
ABI3BP_2	3:100729756:C:T:ABI3BP:rs1449300	4.91424	0.0361795	0.0391912	anno;
ABI3BP_2	3:100732788:A:C:ABI3BP:rs13090397	4.91403	0.0361434	0.0391524	anno;
ABI3BP_2	3:100730939:A:C:ABI3BP:rs13082727	4.91041	0.0355233	0.0384862	anno;
ABI3BP_2	3:100730940:A:C:ABI3BP:rs13082728	4.91041	0.0355233	0.0384862	anno;
ABI3BP_2	3:100730038:G:A:ABI3BP:rs7631509	4.9142	0.0341686	0.0376865	anno;
ABI3BP_1	3:100637871:G:A:ABI3BP:rs9860250	-7.77583	0.0104095	0.0373286	anno;
ABI3BP_1	3:100636101:T:C:ABI3BP:rs28729791	-7.77545	0.0103835	0.0372244	anno;
ABI3BP_1	3:100636843:T:C:ABI3BP:rs9831620	-7.77528	0.0103717	0.0371768	anno;
ABI3BP_1	3:100645475:T:G:ABI3BP:rs2304513	-7.75287	0.00974305	0.0349318	anno;
ABI3BP_1	3:100648298:A:G:ABI3BP:rs9827694	-7.75132	0.00964551	0.034537	anno;
ABL2_1	1:179457770:T:C:ABL2:rs12737798	-4.10619	0.216334	0.216334	anno;
ABL2_1	1:179423953:C:G:ABL2:rs61826000	-4.08825	0.201893	0.201893	anno;
ABL2_1	1:179431259:C:A:ABL2:rs4651034	-4.07776	0.193925	0.193925	anno;
ABL2_1	1:179431260:A:G:ABL2:rs4652390	-4.07776	0.193925	0.193925	anno;
ABL2_1	1:179431386:G:A:ABL2:rs4652391	-4.07776	0.193923	0.193923	anno;
ABLIM1_2	10:116255898:C:T:ABLIM1:rs11816035	-3.8492	0.979667	0.995348	anno;
ABLIM1_1	10:116387668:A:T:ABLIM1:rs7904491	7.13133	0.0412347	0.226119	anno;
ABLIM1_1	10:116382508:T:C:ABLIM1:rs4752043	7.0908	0.312102	0.183004	anno;
ABLIM1_1	10:116378080:T:C:ABLIM1:rs11196807	7.08267	0.0314461	0.172538	anno;peak|
ABLIM1_1	10:116370918:G:A:ABLIM1:rs11594779	7.02127	0.165359	0.0964787	anno;peak|
ABLIM1_1	10:116370934:A:C:ABLIM1:rs11599283	7.00484	0.154955	0.0904558	anno;peak|
ABLIM1_1	10:116393326:C:G:ABLIM1:rs11196819	7.006	0.145801	0.0849853	anno;CRE|DAR|peak|
ABLIM1_1	10:116383343:T:G:ABLIM1:rs17719089	6.99981	0.141234	0.0823252	anno;peak|
ABLIM1_1	10:116405348:C:T:ABLIM1:rs1109267	6.79107	0.00367644	0.0196932	anno;
ABLIM3_1	5:148601243:G:A:ABLIM3:rs13171669	-6.90172	0.319768	0.406722	anno;DAR|peak|
ABLIM3_1	5:148615946:T:C:ABLIM3:rs1109114	-6.79144	0.493844	0.232932	anno;CRE|peak|
ABLIM3_1	5:148615269:T:C:ABLIM3:rs13161048	-6.75887	0.0424896	0.190201	anno;CRE|peak|
ABLIM3_1	5:148593958:T:C:ABLIM3:rs2963489	-6.27645	0.00196286	0.0114489	anno;peak|
ABLIM3_1	5:148604890:A:G:ABLIM3:rs34564665	-6.26044	0.00177944	0.011171	anno;
ABLIM3_1	5:148606052:C:A:ABLIM3:rs13156539	-6.25728	0.0163479	0.0109809	anno;CRE|DAR|peak|
ABLIM3_1	5:148611528:A:G:ABLIM3:rs2400829	-6.16458	0.000993877	0.00672946	anno;
ABLIM3_1	5:148596375:T:G:ABLIM3:rs2963495	-6.19253	0.0110221	0.00597516	anno;CRE|peak|
ABLIM3_1	5:148596041:T:C:ABLIM3:rs2963493	-6.1687	0.00101891	0.00567356	anno;CRE|peak|
ABLIM3_1	5:148596131:C:T:ABLIM3:rs2963494	-6.16866	0.00101864	0.00567232	anno;CRE|peak|
ABLIM3_1	5:148596841:A:G:ABLIM3:rs2918278	-6.16512	0.00934026	0.0055734	anno;
ABLIM3_1	5:148597378:G:A:ABLIM3:rs2963496	-6.16217	0.00917566	0.00549234	anno;CRE|DAR|peak|
ABLIM3_1	5:148595046:C:T:ABLIM3:rs2963491	-6.17114	0.00299698	0.005472	anno;
ABLIM3_1	5:148595285:G:A:ABLIM3:rs2963492	-6.1706	0.00103065	0.00545747	anno;DAR|peak|
ABLIM3_1	5:148618964:A:G:ABLIM3:rs34180939	-6.08932	0.00593062	0.00513364	anno;CRE|peak|
ABLIM3_1	5:148618424:T:C:ABLIM3:rs11168096	-6.08928	0.00592907	0.00513254	anno;CRE|DAR|peak|
ABLIM3_1	5:148618749:T:C:ABLIM3:rs59032271	-6.08925	0.00592798	0.00513175	anno;CRE|peak|
ABLIM3_1	5:148618752:A:G:ABLIM3:rs59757169	-6.08925	0.00592798	0.00513175	anno;CRE|peak|
ABLIM3_1	5:148617988:T:A:ABLIM3:rs10036768	-6.08913	0.00592379	0.00512876	anno;
ABLIM3_1	5:148615987:A:G:ABLIM3:rs4295373	-6.08484	0.00577457	0.00502183	anno;CRE|peak|
ABLIM3_1	5:148620848:A:G:ABLIM3:rs7714706	-6.08306	0.000609987	0.00497812	anno;CRE|peak|
ABLIM3_1	5:148612061:G:A:ABLIM3:rs1011399	-6.06608	0.00516551	0.00472986	anno;CRE|peak|
ABLIM3_1	5:148611207:A:C:ABLIM3:rs1465850	-6.08212	0.000606589	0.00446584	anno;CRE|peak|
ABLIM3_1	5:148611675:C:G:ABLIM3:rs2014787	-6.07876	0.000594584	0.00439448	anno;
ABLIM3_1	5:148611623:A:C:ABLIM3:rs1975340	-6.07478	0.000580697	0.00431183	anno;
ABLIM3_1	5:148594477:G:A:ABLIM3:rs2963490	-6.12631	0.0022889	0.00420512	anno;DAR|peak|
ABLIM3_1	5:148613189:T:C:ABLIM3:rs10079296	-6.03723	0.000464894	0.00411953	anno;CRE|peak|
ABRACL_1	6:139350182:A:G:ABRACL:rs12196247	-6.55546	0.995902	0.955758	anno;Promoter|CRE|DAR|peak|
ABR_3	17:1463808:C:T:ABR:rs59640477	-4.17251	0.996158	0.997768	anno;Promoter|
ABR_4	17:908502:G:A:ABR:rs11247571	4.97523	0.99782	0.994827	anno;3_UTR|peak|
ABR_2	17:1083785:C:G:ABR:rs73975665	4.71437	0.77785	0.752016	anno;Promoter|
ABR_5	17:925764:G:A:ABR:rs2663345	4.47448	0.525105	0.474445	anno;Promoter|peak|
ABR_2	17:1082577:A:G:ABR:rs112222393	4.55622	0.218527	0.290791	anno;Promoter|peak|
ABR_5	17:926359:C:A:ABR:rs2663344	4.30583	0.182123	0.239906	anno;Promoter|peak|
ABR_5	17:926740:A:G:ABR:rs2663343	4.28348	0.0579541	0.231482	anno;Promoter|peak|
ABR_5	17:926121:A:G:ABR:rs2586252	4.27219	0.157213	0.223999	anno;Promoter|peak|
ABR_5	17:927516:C:A:ABR:rs2663339	4.23701	0.0451404	0.20682	anno;peak|
ABR_5	17:925304:G:A:ABR:rs2663349	4.23511	0.0303491	0.17699	anno;Promoter|peak|
ABR_2	17:1070398:T:C:ABR:rs10902642	4.78898	0.00145991	0.155643	anno;peak|
ABTB2_1	11:34311031:A:G:ABTB2:rs2420520	4.60084	0.30686	0.129192	anno;peak|
ABTB2_1	11:34309863:T:C:ABTB2:rs7125686	4.61432	0.0324446	0.127916	anno;
ABTB2_1	11:34310403:G:A:ABTB2:rs7935569	4.61244	0.301431	0.126902	anno;CRE|DAR|peak|
ABTB2_1	11:34304825:C:T:ABTB2:rs10836181	4.54346	0.0279226	0.110348	anno;
ABTB2_1	11:34297211:A:G:ABTB2:rs2420525	4.51481	0.0801252	0.109118	anno;peak|
ABTB2_2	11:34422715:G:A:ABTB2:rs11605706	-4.33125	0.101233	0.106287	anno;
ABTB2_2	11:34423616:A:G:ABTB2:rs10836214	-4.32754	0.0997384	0.104705	anno;
ABTB2_2	11:34422989:T:A:ABTB2:rs113780763	-4.32712	0.0995742	0.104531	anno;
ABTB2_2	11:34422938:T:C:ABTB2:rs112673775	-4.32689	0.0994819	0.104433	anno;
ABTB2_2	11:34420530:C:T:ABTB2:rs10836212	-4.32663	0.0993788	0.104324	anno;
ABTB2_2	11:34421312:T:C:ABTB2:rs7928635	-4.32386	0.0982844	0.103166	anno;
ABTB2_2	11:34420723:A:T:ABTB2:rs7940061	-4.32351	0.0981467	0.10302	anno;
ABTB2_2	11:34420978:A:G:ABTB2:rs7928368	-4.31906	0.0964172	0.101189	anno;
ABTB2_1	11:34309519:C:T:ABTB2:rs1998276	4.28702	0.0208442	0.0839025	anno;peak|
ABTB2_2	11:34418885:T:C:ABTB2:rs10836210	-4.27182	0.080182	0.0826683	anno;
ABTB2_1	11:34307712:G:T:ABTB2:rs2611087	4.27779	0.0205304	0.0826339	anno;
ABTB2_1	11:34310975:C:A:ABTB2:rs2254302	4.2643	0.171297	0.0734137	anno;peak|
ABTB2_1	11:34309237:G:A:ABTB2:rs1998277	4.17281	0.0137143	0.0551387	anno;peak|
ABTB2_1	11:34308774:T:C:ABTB2:rs714969	4.17255	0.0136998	0.0550803	anno;
ABTB2_2	11:34418700:T:A:ABTB2:rs35843556	-4.10959	0.0465219	0.0484695	anno;
AC000068.10_1	22:19447182:C:T:AC000068.10:rs17811276	4.46142	0.145281	0.21318	anno;
AC000068.10_1	22:19428511:G:A:AC000068.10:rs11744	4.42987	0.368726	0.186682	anno;3_UTR|peak|
AC000068.10_1	22:19292446:G:T:AC000068.10:rs8135222	4.41267	0.118382	0.173725	anno;
AC000068.10_1	22:19457743:C:T:AC000068.10:rs2238770	4.21671	0.0531733	0.0780592	anno;
AC000068.10_1	22:19458412:G:A:AC000068.10:rs17811336	4.21665	0.0531589	0.0780379	anno;
AC000068.10_1	22:19461105:A:G:AC000068.10:rs75077817	4.1933	0.0484419	0.0711162	anno;
AC000068.10_1	22:19453727:G:C:AC000068.10:rs2238769	4.14892	0.117838	0.0596898	anno;peak|
AC000068.10_1	22:19440597:A:G:AC000068.10:rs75637138	4.06169	0.0289662	0.042534	anno;3_UTR|
AC000068.10_1	22:19397149:A:G:AC000068.10:rs7284201	3.99002	0.0220432	0.0323722	anno;
AC000068.10_1	22:19386633:C:T:AC000068.10:rs2238768	3.98967	0.0220138	0.0323291	anno;5_UTR|
AC000068.5_1	22:19440597:A:G:AC000068.5:rs75637138	-10.1694	0.514558	0.478981	anno;3_UTR|
AC000068.5_1	22:19457743:C:T:AC000068.5:rs2238770	-10.0395	0.11783	0.129999	anno;
AC000068.5_1	22:19458412:G:A:AC000068.5:rs17811336	-10.0395	0.117751	0.129923	anno;
AC000068.5_1	22:19461105:A:G:AC000068.5:rs75077817	-10.0331	0.104532	0.122041	anno;
AC000068.5_1	22:19365286:C:T:AC000068.5:rs2285334	-9.90246	0.035553	0.0380599	anno;
AC000068.5_1	22:19397149:A:G:AC000068.5:rs7284201	-9.85649	0.026324	0.0274338	anno;
AC000068.5_1	22:19362618:T:G:AC000068.5:rs2073773	-9.85648	0.0219802	0.0259118	anno;
AC000068.5_1	22:19386633:C:T:AC000068.5:rs2238768	-9.85625	0.0219289	0.0258645	anno;5_UTR|
AC000068.5_1	22:19453727:G:C:AC000068.5:rs2238769	-9.75966	0.021196	0.0129574	anno;peak|
AC000068.5_1	22:19322239:G:C:AC000068.5:rs74276659	-9.7396	0.00700556	0.0118343	anno;
AC000124.1_1	7:127108310:A:T:AC000124.1:rs1419406	-9.85621	0.0150943	0.0195352	anno;
AC000124.1_1	7:127109732:A:G:AC000124.1:rs13309123	-9.7898	0.00791527	0.010244	anno;peak|
AC000124.1_1	7:127108363:T:C:AC000124.1:rs1419407	-9.78877	0.00783682	0.0101424	anno;
AC000124.1_1	7:127108939:C:T:AC000124.1:rs55724193	-9.78869	0.00783097	0.0101349	anno;
AC000124.1_1	7:127109659:G:T:AC000124.1:rs62471168	-9.78869	0.00783097	0.0101349	anno;
AC000124.1_1	7:127109713:C:T:AC000124.1:rs13309325	-9.78869	0.00783097	0.0101349	anno;peak|
AC000124.1_1	7:127109906:C:T:AC000124.1:rs13309424	-9.78869	0.00783097	0.0101349	anno;peak|
AC000124.1_1	7:127110018:A:C:AC000124.1:rs13309150	-9.78869	0.00783097	0.0101349	anno;peak|
AC000124.1_1	7:127102428:C:T:AC000124.1:rs6963346	-9.78867	0.00782914	0.0101325	anno;
AC000124.1_1	7:127108126:A:C:AC000124.1:rs35931427	-9.78861	0.00782519	0.0101274	anno;
AC000124.1_1	7:127110765:T:G:AC000124.1:rs13243596	-9.78859	0.00782361	0.0101253	anno;
AC000124.1_1	7:127109083:A:G:AC000124.1:rs36077624	-9.78858	0.00782269	0.0101242	anno;
AC000124.1_1	7:127095859:A:C:AC000124.1:rs6467131	-9.78855	0.00782063	0.0101215	anno;
AC000124.1_1	7:127099576:T:G:AC000124.1:rs6965471	-9.78852	0.00781808	0.0101182	anno;
AC000124.1_1	7:127101508:A:G:AC000124.1:rs6976096	-9.78852	0.00781808	0.0101182	anno;
AC000124.1_1	7:127103455:C:A:AC000124.1:rs6958074	-9.78852	0.00781808	0.0101182	anno;
AC000124.1_1	7:127111144:G:A:AC000124.1:rs1419409	-9.78851	0.00781771	0.0101177	anno;
AC000124.1_1	7:127107825:G:A:AC000124.1:rs2106178	-9.78851	0.00781741	0.0101173	anno;
AC000124.1_1	7:127092736:G:A:AC000124.1:rs10246834	-9.78845	0.0078131	0.0101117	anno;
AC000124.1_1	7:127091887:G:A:AC000124.1:rs7784526	-9.78842	0.0078108	0.0101088	anno;
AC000124.1_1	7:127096068:T:A:AC000124.1:rs6944378	-9.78842	0.00781062	0.0101085	anno;
AC000124.1_1	7:127095724:A:T:AC000124.1:rs4492321	-9.7884	0.00780916	0.0101066	anno;
AC000124.1_1	7:127093659:C:T:AC000124.1:rs6953389	-9.78839	0.0078085	0.0101058	anno;
AC000124.1_1	7:127093793:T:C:AC000124.1:rs6971199	-9.78839	0.0078085	0.0101058	anno;
AC000124.1_1	7:127098420:C:A:AC000124.1:rs1582251	-9.78837	0.00780662	0.0101033	anno;
AC000124.1_1	7:127098577:C:T:AC000124.1:rs1582252	-9.78837	0.00780662	0.0101033	anno;
AC000124.1_1	7:127098917:C:T:AC000124.1:rs6942509	-9.78837	0.00780662	0.0101033	anno;
AC000124.1_1	7:127099058:A:G:AC000124.1:rs6961001	-9.78837	0.00780662	0.0101033	anno;
AC000124.1_1	7:127099433:G:A:AC000124.1:rs6964923	-9.78837	0.00780662	0.0101033	anno;
AC000124.1_1	7:127099921:C:G:AC000124.1:rs11971040	-9.78837	0.00780662	0.0101033	anno;
AC000124.1_1	7:127100123:G:A:AC000124.1:rs11977840	-9.78837	0.00780662	0.0101033	anno;
AC000124.1_1	7:127100215:T:C:AC000124.1:rs11971083	-9.78837	0.00780662	0.0101033	anno;
AC000124.1_1	7:127100957:C:T:AC000124.1:rs7786742	-9.78837	0.00780662	0.0101033	anno;
AC000124.1_1	7:127101880:T:C:AC000124.1:rs6976434	-9.78837	0.00780662	0.0101033	anno;
AC000124.1_1	7:127102282:A:G:AC000124.1:rs6977367	-9.78837	0.00780662	0.0101033	anno;
AC000124.1_1	7:127102639:T:C:AC000124.1:rs6943471	-9.78837	0.00780662	0.0101033	anno;
AC000124.1_1	7:127102640:G:A:AC000124.1:rs6943326	-9.78837	0.00780662	0.0101033	anno;
AC000124.1_1	7:127103660:G:A:AC000124.1:rs6958391	-9.78837	0.00780662	0.0101033	anno;
AC000124.1_1	7:127103982:G:T:AC000124.1:rs34849540	-9.78837	0.00780662	0.0101033	anno;
AC000124.1_1	7:127092322:C:T:AC000124.1:rs113378577	-9.78828	0.00780015	0.010095	anno;
AC000124.1_1	7:127093030:C:T:AC000124.1:rs2188183	-9.78818	0.00779254	0.0100851	anno;
AC000124.1_1	7:127091494:T:C:AC000124.1:rs6467128	-9.78813	0.00778856	0.01008	anno;
AC000124.1_1	7:127106469:C:A:AC000124.1:rs10487485	-9.78801	0.00777929	0.010068	anno;
AC000124.1_1	7:127104763:A:G:AC000124.1:rs6964250	-9.78795	0.00777503	0.0100625	anno;
AC000124.1_1	7:127104766:C:T:AC000124.1:rs6946059	-9.78795	0.00777503	0.0100625	anno;
AC000124.1_1	7:127090438:T:C:AC000124.1:rs10267540	-9.78787	0.00776867	0.0100542	anno;
AC000124.1_1	7:127090331:T:G:AC000124.1:rs10267624	-9.78783	0.00776573	0.0100504	anno;
AC000124.1_1	7:127106316:G:A:AC000124.1:rs55986765	-9.78757	0.00774679	0.0100259	anno;
AC000124.1_1	7:127090645:G:A:AC000124.1:rs10238301	-9.78756	0.00774542	0.0100241	anno;
AC000124.1_1	7:127090125:G:C:AC000124.1:rs2213967	-9.78734	0.00772937	0.0100034	anno;
AC000124.1_1	7:127108977:T:C:AC000124.1:rs17656920	-9.78684	0.00769165	0.00995455	anno;
AC000124.1_1	7:127099288:A:G:AC000124.1:rs6961344	-9.78618	0.00764314	0.00989177	anno;
AC000124.1_1	7:127087758:C:T:AC000124.1:rs6949560	-9.7848	0.021858	0.00975995	anno;CRE|DAR|peak|
AC000124.1_1	7:127087304:T:C:AC000124.1:rs6963011	-9.78443	0.0217802	0.00972523	anno;
AC000124.1_1	7:127087338:T:C:AC000124.1:rs6966790	-9.78415	0.0217216	0.00969905	anno;
AC000124.1_1	7:127086961:A:G:AC000124.1:rs6962782	-9.78399	0.0216877	0.00968392	anno;
AC000124.1_1	7:127090107:T:C:AC000124.1:rs2213966	-9.7822	0.00735412	0.00951772	anno;
AC000124.1_1	7:127085539:T:C:AC000124.1:rs7789682	-9.78066	0.00724515	0.00937668	anno;
AC000124.1_1	7:127111478:T:C:AC000124.1:rs13246859	-9.77821	0.00707524	0.00915679	anno;
AC000124.1_1	7:127084249:A:T:AC000124.1:rs1894722	-9.77786	0.00705156	0.00912613	anno;
AC000124.1_1	7:127111863:A:G:AC000124.1:rs35145716	-9.7731	0.00673402	0.00871518	anno;
AC000124.1_1	7:127111944:A:T:AC000124.1:rs1894724	-9.77063	0.0065756	0.00851015	anno;
AC000124.1_1	7:127112287:T:G:AC000124.1:rs13220954	-9.76544	0.00625331	0.00809303	anno;
AC000124.1_1	7:127114401:T:C:AC000124.1:rs55662335	-9.76533	0.00624674	0.00808453	anno;
AC000124.1_1	7:127114555:A:G:AC000124.1:rs11975300	-9.76533	0.00624674	0.00808453	anno;
AC000124.1_1	7:127112546:G:A:AC000124.1:rs13223578	-9.7653	0.00624501	0.00808229	anno;
AC000124.1_1	7:127112569:A:G:AC000124.1:rs34631930	-9.7653	0.00624501	0.00808229	anno;
AC000124.1_1	7:127112911:A:G:AC000124.1:rs17656985	-9.7653	0.00624501	0.00808229	anno;
AC000124.1_1	7:127113498:T:C:AC000124.1:rs34636667	-9.76505	0.00623024	0.00806317	anno;
AC000124.1_1	7:127114846:A:G:AC000124.1:rs10487486	-9.76497	0.00622506	0.00805647	anno;
AC000124.1_1	7:127114943:C:A:AC000124.1:rs11982078	-9.76357	0.00614155	0.00794839	anno;
AC000124.1_1	7:127115284:T:C:AC000124.1:rs12534009	-9.75955	0.0171234	0.00764585	anno;CRE|peak|
AC000124.1_1	7:127115832:T:A:AC000124.1:rs6956745	-9.75809	0.0168827	0.00753839	anno;
AC000124.1_1	7:127116150:A:G:AC000124.1:rs6957647	-9.75604	0.0165524	0.00739091	anno;CRE|peak|
AC000124.1_1	7:127116527:C:A:AC000124.1:rs6961560	-9.75336	0.0161306	0.00720256	anno;
AC000124.1_1	7:127117174:A:C:AC000124.1:rs6962699	-9.74918	0.0154926	0.00691766	anno;
AC000124.1_1	7:127118825:A:G:AC000124.1:rs35598729	-9.74503	0.00513528	0.00664607	anno;peak|
AC000124.1_1	7:127118239:T:C:AC000124.1:rs35267522	-9.74501	0.0148819	0.00664497	anno;
AC000124.1_1	7:127122824:G:T:AC000124.1:rs1419411	-9.74452	0.00510992	0.00661324	anno;
AC000124.1_1	7:127125494:A:G:AC000124.1:rs2301561	-9.74421	0.0147666	0.00659351	anno;
AC000124.1_1	7:127117925:C:T:AC000124.1:rs1361949	-9.74413	0.014756	0.00658878	anno;CRE|peak|
AC000124.1_1	7:127117945:G:A:AC000124.1:rs1361950	-9.74413	0.014756	0.00658878	anno;CRE|peak|
AC000124.1_1	7:127117969:A:G:AC000124.1:rs2896390	-9.74413	0.014756	0.00658878	anno;CRE|peak|
AC000124.1_1	7:127118073:G:A:AC000124.1:rs1361951	-9.74413	0.014756	0.00658878	anno;CRE|peak|
AC000124.1_1	7:127118102:C:T:AC000124.1:rs1361952	-9.74413	0.014756	0.00658878	anno;CRE|peak|
AC000124.1_1	7:127120099:G:A:AC000124.1:rs6978509	-9.74403	0.00508579	0.00658202	anno;
AC000124.1_1	7:127127584:T:A:AC000124.1:rs62471203	-9.74397	0.0147332	0.0065786	anno;DAR|peak|
AC000124.1_1	7:127128240:G:C:AC000124.1:rs6966849	-9.74389	0.00507931	0.00657363	anno;peak|
AC000124.1_1	7:127120751:G:C:AC000124.1:rs34686367	-9.74383	0.00507624	0.00656966	anno;
AC000124.1_1	7:127121481:T:C:AC000124.1:rs1361953	-9.74383	0.00507624	0.00656966	anno;
AC000124.1_1	7:127131611:T:A:AC000124.1:rs17150921	-9.74358	0.00506399	0.00655381	anno;
AC000124.1_1	7:127125173:T:C:AC000124.1:rs4141411	-9.74352	0.0146689	0.00654986	anno;peak|
AC000124.1_1	7:127125370:C:T:AC000124.1:rs13228164	-9.74344	0.0146579	0.00654497	anno;peak|
AC000124.1_1	7:127126049:G:A:AC000124.1:rs34510716	-9.74332	0.00505143	0.00653755	anno;
AC000124.1_1	7:127126185:A:G:AC000124.1:rs33957168	-9.74332	0.00505143	0.00653755	anno;
AC000124.1_1	7:127129209:A:G:AC000124.1:rs71578233	-9.74323	0.00504714	0.006532	anno;
AC000124.1_1	7:127127766:G:T:AC000124.1:rs36062251	-9.7432	0.0146247	0.00653015	anno;DAR|peak|
AC000124.1_1	7:127136378:T:C:AC000124.1:rs13235733	-9.74315	0.00504296	0.00652658	anno;
AC000124.1_1	7:127128688:A:G:AC000124.1:rs12706806	-9.74313	0.0050419	0.00652522	anno;
AC000124.1_1	7:127128901:T:C:AC000124.1:rs13225881	-9.74313	0.0050419	0.00652522	anno;
AC000124.1_1	7:127129239:G:A:AC000124.1:rs2402862	-9.74301	0.00503618	0.00651782	anno;
AC000124.1_1	7:127129331:G:A:AC000124.1:rs2402863	-9.74301	0.00503618	0.00651782	anno;
AC000124.1_1	7:127129839:C:T:AC000124.1:rs148956265	-9.74301	0.00503618	0.00651782	anno;
AC000124.1_1	7:127131007:G:A:AC000124.1:rs2402864	-9.74281	0.0145696	0.00650553	anno;
AC000124.1_1	7:127131150:A:G:AC000124.1:rs2896393	-9.74281	0.00502669	0.00650553	anno;
AC000124.1_1	7:127133701:A:G:AC000124.1:rs1419400	-9.74274	0.00502321	0.00650103	anno;
AC000124.1_1	7:127134095:T:C:AC000124.1:rs34976296	-9.74274	0.00502321	0.00650103	anno;
AC000124.1_1	7:127134504:A:G:AC000124.1:rs13228307	-9.74262	0.00501748	0.00649361	anno;peak|
AC000124.1_1	7:127129754:C:T:AC000124.1:rs10278458	-9.74021	0.00490209	0.00634427	anno;
AC002055.4_1	22:51182090:A:G:AC002055.4:rs28516879	-7.08117	0.58294	0.557068	anno;
AC002055.4_1	22:51181687:T:A:AC002055.4:rs9616955	-7.00026	0.211165	0.244802	anno;
AC002055.4_1	22:51181600:G:A:AC002055.4:rs9616954	-6.78695	0.196074	0.213357	anno;
AC002055.4_1	22:51161093:T:C:AC002055.4:rs56207913	-6.80922	0.163386	0.192028	anno;
AC002055.4_1	22:51155446:T:A:AC002055.4:rs78342408	-6.78281	0.153725	0.179562	anno;
AC002055.4_1	22:51158301:C:T:AC002055.4:rs117910162	-6.76174	0.148484	0.174612	anno;peak|
AC002064.5_1	7:89930180:G:T:AC002064.5:rs2040517	-9.92057	0.0330336	0.0407837	anno;
AC002064.5_1	7:89908851:A:G:AC002064.5:rs3810891	-9.90403	0.0286349	0.035313	anno;Promoter|
AC002064.5_1	7:89912513:C:T:AC002064.5:rs2027965	-9.90268	0.0279508	0.0344887	anno;
AC002064.5_1	7:89908833:G:T:AC002064.5:rs3810890	-9.90126	0.0279045	0.0344092	anno;Promoter|
AC002064.5_1	7:89909442:G:A:AC002064.5:rs10262603	-9.90126	0.0279045	0.0344092	anno;Promoter|
AC002064.5_1	7:89909982:G:A:AC002064.5:rs10266179	-9.90121	0.0278925	0.0343944	anno;Promoter|
AC002064.5_1	7:89913269:C:T:AC002064.5:rs1015402	-9.90112	0.0278683	0.0343645	anno;
AC002064.5_1	7:89914388:G:T:AC002064.5:rs12704518	-9.90112	0.0278683	0.0343645	anno;
AC002064.5_1	7:89938086:C:T:AC002064.5:rs6970376	-9.90112	0.0278683	0.0343645	anno;
AC002064.5_1	7:89938680:C:T:AC002064.5:rs1134956	-9.90112	0.0278683	0.0343645	anno;Exon|
AC002064.5_1	7:89931515:A:G:AC002064.5:rs6465257	-9.90157	0.027857	0.0343448	anno;
AC002064.5_1	7:89913702:A:G:AC002064.5:rs1015403	-9.9004	0.0276836	0.034136	anno;
AC002064.5_1	7:89915338:G:A:AC002064.5:rs3761804	-9.9004	0.0800927	0.034136	anno;peak|
AC002064.5_1	7:89921511:A:G:AC002064.5:rs10260905	-9.9004	0.0276836	0.034136	anno;
AC002064.5_1	7:89924232:T:G:AC002064.5:rs4728878	-9.9004	0.0276836	0.034136	anno;
AC002064.5_1	7:89924400:C:A:AC002064.5:rs13239439	-9.9004	0.0276836	0.034136	anno;
AC002064.5_1	7:89924767:G:A:AC002064.5:rs7786771	-9.9004	0.0276836	0.034136	anno;
AC002064.5_1	7:89937781:T:A:AC002064.5:rs6948139	-9.9004	0.0276836	0.034136	anno;
AC002064.5_1	7:89938191:G:A:AC002064.5:rs6970750	-9.9004	0.0276836	0.034136	anno;
AC002064.5_1	7:89941884:T:C:AC002064.5:rs12374728	-9.89905	0.0273363	0.0337062	anno;
AC002064.5_1	7:89945403:C:T:AC002064.5:rs174059	-9.88903	0.0249121	0.0307069	anno;
AC002064.5_1	7:89949855:A:T:AC002064.5:rs42609	-9.87447	0.021782	0.0268351	anno;peak|
AC002064.5_1	7:89950060:C:A:AC002064.5:rs42611	-9.87431	0.0629255	0.0267947	anno;peak|
AC002064.5_1	7:89950303:C:T:AC002064.5:rs42613	-9.8741	0.0628095	0.0267452	anno;peak|
AC002064.5_1	7:89950501:G:T:AC002064.5:rs42615	-9.87394	0.0627144	0.0267045	anno;peak|
AC002064.5_1	7:89952046:T:A:AC002064.5:rs42617	-9.86984	0.0214983	0.0263846	anno;
AC002064.5_1	7:89892286:T:G:AC002064.5:rs10251227	-9.83425	0.0152492	0.0187227	anno;
AC002064.5_1	7:89913946:G:C:AC002064.5:rs1015404	-9.8064	0.0118126	0.0145129	anno;
AC002064.5_1	7:89900383:T:C:AC002064.5:rs10262472	-9.79588	0.0107985	0.0132533	anno;
AC002064.5_1	7:89918278:T:C:AC002064.5:rs10234301	-9.79468	0.010687	0.0131156	anno;
AC002064.5_1	7:89921072:C:T:AC002064.5:rs6973816	-9.79468	0.010687	0.0131156	anno;
AC002064.5_1	7:89924237:T:G:AC002064.5:rs4728879	-9.79468	0.010687	0.0131156	anno;
AC002064.5_1	7:89940331:G:A:AC002064.5:rs12375075	-9.79439	0.0106604	0.0130829	anno;3_UTR|
AC002064.5_1	7:89950363:C:G:AC002064.5:rs42614	-9.76826	0.0246721	0.01045	anno;peak|
AC002064.5_1	7:89956484:A:G:AC002064.5:rs42621	-9.71355	0.00571659	0.00695479	anno;
AC002064.5_1	7:89956824:A:G:AC002064.5:rs42622	-9.71263	0.0056756	0.00690453	anno;
AC002064.5_1	7:89957541:C:G:AC002064.5:rs42624	-9.71038	0.00557679	0.00678339	anno;
AC002064.5_1	7:89986525:A:C:AC002064.5:rs42668	-9.68746	0.00473866	0.00573744	anno;
AC002064.5_1	7:89961876:G:A:AC002064.5:rs42627	-9.66549	0.00399071	0.00483983	anno;peak|
AC002076.10_1	7:93429857:A:G:AC002076.10:rs2374679	-7.18514	0.248311	0.273233	anno;
AC002076.10_1	7:93434308:T:G:AC002076.10:rs6952162	-7.1801	0.239651	0.263703	anno;
AC002076.10_1	7:93435967:G:A:AC002076.10:rs10464585	-7.06186	0.105009	0.11554	anno;
AC002076.10_1	7:93425567:A:C:AC002076.10:rs34344013	-7.05805	0.102277	0.112535	anno;
AC002076.10_1	7:93510254:A:G:AC002076.10:rs987047	-6.94718	0.0477931	0.0525834	anno;
AC002076.10_1	7:93515993:G:T:AC002076.10:rs4517	-6.94713	0.047776	0.0525645	anno;3_UTR|
AC002076.10_1	7:93511595:C:G:AC002076.10:rs56929562	-6.94708	0.138429	0.0525468	anno;
AC002076.10_1	7:93521261:C:G:AC002076.10:rs59805398	-6.93539	0.0441081	0.0485288	anno;Promoter|
AC002467.7_1	7:107360916:C:G:AC002467.7:rs6947099	7.102	0.0871377	0.127141	anno;
AC002467.7_1	7:107404473:G:A:AC002467.7:rs12539555	7.08326	0.192019	0.099638	anno;
AC002467.7_1	7:107383744:G:C:AC002467.7:rs3735609	7.08258	0.191669	0.0994327	anno;Promoter|
AC002467.7_1	7:107388911:C:T:AC002467.7:rs6956243	7.08195	0.0695649	0.0992448	anno;
AC002467.7_1	7:107401429:G:A:AC002467.7:rs12705421	7.08189	0.069553	0.0992261	anno;3_UTR|
AC002467.7_1	7:107386396:A:G:AC002467.7:rs10808154	7.08171	0.0695195	0.0991736	anno;
AC002467.7_1	7:107384278:T:C:AC002467.7:rs3735607	7.08167	0.191206	0.0991611	anno;Promoter|peak|
AC002467.7_1	7:107390875:T:C:AC002467.7:rs78400305	7.08004	0.0692028	0.098676	anno;
AC002467.7_1	7:107395342:A:G:AC002467.7:rs13226711	7.07924	0.0690522	0.0984395	anno;
AC002467.7_1	7:107389979:T:C:AC002467.7:rs13231387	7.07906	0.069018	0.0983857	anno;
AC002467.7_1	7:107396232:G:A:AC002467.7:rs4730258	7.08642	0.0690354	0.0974008	anno;
AC002467.7_1	7:107384309:G:C:AC002467.7:rs3735606	7.08184	0.187388	0.0963587	anno;Promoter|peak|
AC002467.7_1	7:107404360:A:C:AC002467.7:rs7787927	7.08268	0.185362	0.0946937	anno;
AC002467.7_1	7:107386251:T:C:AC002467.7:rs7782475	7.08177	0.0671736	0.0944491	anno;
AC002467.7_1	7:107384127:A:G:AC002467.7:rs739518	7.05824	0.176794	0.0903766	anno;Promoter|peak|
AC002467.7_1	7:107382352:T:G:AC002467.7:rs13224313	7.01179	0.0598202	0.083792	anno;
AC002467.7_1	7:107375245:A:G:AC002467.7:rs13242107	7.00042	0.0574845	0.0802415	anno;
AC002467.7_1	7:107370034:A:G:AC002467.7:rs66560125	7.00026	0.0574668	0.0802135	anno;
AC002467.7_1	7:107380703:A:C:AC002467.7:rs28690459	6.99949	0.0573808	0.0800782	anno;
AC002467.7_1	7:107379455:C:G:AC002467.7:rs34986332	6.99589	0.0569826	0.0794507	anno;
AC002467.7_1	7:107370632:A:G:AC002467.7:rs9718496	6.98916	0.0565909	0.0787979	anno;
AC002467.7_1	7:107377681:G:A:AC002467.7:rs6942747	6.97668	0.053826	0.0739458	anno;
AC002467.7_1	7:107409810:G:A:AC002467.7:rs41666	6.94402	0.0526015	0.0725554	anno;
AC002472.13_1	22:21405546:T:C:AC002472.13:rs73164873	9.49114	0.906694	0.906445	anno;
AC002472.13_1	22:21404113:G:A:AC002472.13:rs9625422	9.23659	0.185897	0.218654	anno;
AC003075.4_1	7:17338055:A:G:AC003075.4:rs41351350	5.53667	0.82745	0.60282	anno;Promoter|peak|
AC003075.4_1	7:17301557:T:G:AC003075.4:rs138250592	5.43213	0.163969	0.455873	anno;
AC003102.3_1	17:42380737:C:A:AC003102.3:rs4793088	10.2584	0.462802	0.556754	anno;Exon|
AC003102.3_1	17:42393494:T:C:AC003102.3:rs2074104	10.1833	0.248718	0.287473	anno;
AC003102.3_1	17:42415772:T:C:AC003102.3:rs11655476	10.0809	0.336985	0.132201	anno;
AC003102.3_1	17:42418603:T:C:AC003102.3:rs8071944	10.0334	0.0918158	0.0943781	anno;
AC004069.2_1	4:106154259:T:G:AC004069.2:rs62330908	4.2734	0.807896	0.579937	anno;Promoter|
AC004069.2_1	4:105852603:C:G:AC004069.2:rs143262555	4.08739	0.235214	0.517979	anno;peak|
AC004069.2_1	4:105966762:G:C:AC004069.2:rs62331090	3.84441	0.459003	0.337382	anno;
AC004069.2_1	4:106408838:G:A:AC004069.2:rs62317286	3.86789	0.170117	0.297522	anno;
AC004156.3_3	19:667400:C:T:AC004156.3:rs75308942	-4.53511	0.572509	0.790496	anno;
AC004156.3_1	19:614805:T:C:AC004156.3:rs28413822	-4.93783	0.485045	0.484205	anno;
AC004156.3_1	19:614865:T:C:AC004156.3:rs10409425	-4.9312	0.460499	0.462571	anno;
AC004156.3_2	19:1174602:T:C:AC004156.3:rs873074	-4.12148	0.483962	0.367899	anno;Promoter|
AC004156.3_2	19:1176281:C:G:AC004156.3:rs138878009	-4.10344	0.161052	0.357384	anno;peak|
AC004156.3_2	19:1173826:T:G:AC004156.3:rs111467467	-4.06863	0.364638	0.279876	anno;Promoter|
AC004156.3_3	19:663956:C:A:AC004156.3:rs7255896	-4.17237	0.403462	0.188502	anno;Promoter|peak|
AC004156.3_1	19:614538:A:G:AC004156.3:rs28631088	-4.32535	0.0570533	0.0599717	anno;
AC004466.1_1	12:48172058:A:G:AC004466.1:rs4760742	-4.08884	0.119061	0.190932	anno;peak|
AC004466.1_1	12:48170172:T:C:AC004466.1:rs3782906	-4.00779	0.0875667	0.140398	anno;
AC004466.1_1	12:48179044:C:G:AC004466.1:rs3815133	-4.00641	0.0871159	0.139675	anno;
AC004466.1_1	12:48173570:T:C:AC004466.1:rs7960277	-3.94737	0.202667	0.112093	anno;peak|
AC004466.1_1	12:48176792:C:T:AC004466.1:rs7418	-3.93709	0.0673172	0.107913	anno;3_UTR|peak|
AC004466.1_1	12:48177073:A:G:AC004466.1:rs2408874	-3.92684	0.187889	0.103914	anno;3_UTR|peak|
AC004466.1_1	12:48178127:A:G:AC004466.1:rs3192737	-3.92541	0.0644842	0.103369	anno;
AC004466.1_1	12:48175604:A:G:AC004466.1:rs4760652	-3.921	0.1839	0.101706	anno;3_UTR|peak|
AC004540.5_1	7:26438728:G:T:AC004540.5:rs1238010	-7.74485	0.436586	0.319419	anno;Promoter|
AC004540.5_1	7:26440708:G:T:AC004540.5:rs976347	-7.71284	0.118108	0.250458	anno;peak|
AC004540.5_1	7:26442474:T:A:AC004540.5:rs1229669	-7.65292	0.0751171	0.15929	anno;Promoter|
AC004540.5_1	7:26436774:A:G:AC004540.5:rs1229659	-7.60783	0.155246	0.11358	anno;
AC004540.5_1	7:26438699:A:G:AC004540.5:rs1229664	-7.57924	0.125415	0.0917547	anno;Promoter|
AC004540.5_1	7:26439331:T:G:AC004540.5:rs1013688	-7.53386	0.0895273	0.0654987	anno;Promoter|
AC004980.11_1	7:76632993:C:T:AC004980.11:rs62474181	-6.99542	0.239975	0.279583	anno;
AC004980.11_1	7:76640894:T:C:AC004980.11:rs113634522	-6.88461	0.113077	0.131742	anno;
AC004980.11_1	7:76639782:T:C:AC004980.11:rs6969667	-6.82263	0.216282	0.0869367	anno;DAR|peak|
AC004980.11_1	7:76638504:G:A:AC004980.11:rs7811614	-6.80202	0.065041	0.0757767	anno;
AC004980.11_1	7:76633856:A:T:AC004980.11:rs2260333	-6.80097	0.0645892	0.0752503	anno;
AC004980.11_1	7:76637441:A:G:AC004980.11:rs10278476	-6.78173	0.0568383	0.0662201	anno;
AC004980.11_1	7:76686910:G:T:AC004980.11:rs73705172	-6.66325	0.026071	0.0303745	anno;
AC004980.11_1	7:76692282:A:G:AC004980.11:rs3972451	-6.66176	0.0258193	0.0300812	anno;
AC004980.11_1	7:76600524:C:T:AC004980.11:rs2539615	-6.65261	0.024326	0.0283414	anno;
AC004980.11_1	7:76686838:G:A:AC004980.11:rs200613679	-6.63808	0.0221328	0.0257862	anno;
AC004980.11_1	7:76681764:C:A:AC004980.11:rs71249369	-6.6372	0.0220059	0.0256384	anno;Exon|
AC004980.11_1	7:76691575:C:T:AC004980.11:rs28376470	-6.63332	0.0214595	0.0250017	anno;
AC004980.11_1	7:76578148:C:A:AC004980.11:rs2539595	-6.61879	0.0195295	0.0227532	anno;
AC004980.11_1	7:76596007:T:C:AC004980.11:rs2539609	-6.60317	0.0176529	0.0205669	anno;
AC004980.11_1	7:76568645:G:A:AC004980.11:rs60624303	-6.59011	0.0162258	0.0189042	anno;
AC004980.11_1	7:76596992:A:G:AC004980.11:rs2462303	-6.58743	0.0159482	0.0185808	anno;
AC004980.7_1	7:76209459:G:A:AC004980.7:rs17718122	9.95562	0.142642	0.164709	anno;
AC004980.7_1	7:76224198:G:A:AC004980.7:rs75292946	9.92285	0.103339	0.119325	anno;
AC004980.7_1	7:76217156:T:C:AC004980.7:rs6948444	9.92144	0.101916	0.117681	anno;
AC004980.7_1	7:76211025:G:A:AC004980.7:rs147253019	9.91759	0.0981347	0.113315	anno;
AC004980.7_1	7:76207594:T:C:AC004980.7:rs140080401	9.9117	0.0926202	0.106947	anno;
[truncated: 314,418+ more rows]
