# Supplementary material for: Integrated multi-omics single cell atlas of the human retina
Source: Research Square preprint supplement (doi:10.21203/rs.3.rs-3471275/v1), 2023-11-16
Supplement: Supplementary file 17 [file b729ebfd4a7f1fb97b3a34ba.xlsx]

## Sheet: Table S11
Table S11. Metadata information of snATAC-seq samples
institute	study_PI	sampleid	dataset_name	donor	tissue	race	gender	age	disociation	sequencing_platform	cell_enrichment	reference_genome_build	reference_genome	reads_processing
Baylor College of Medicine	Rui Chen	19D013_fovea	Chen_e	Chen_19D013	fovea	Caucasian	Female	78	single nuclei	Illumina Novaseq 6000	None	cellranger/arc-GRCh38-2020-A-2.0.0	GRCh38	cellranger-atac-2.1.0
Baylor College of Medicine	Rui Chen	19D013_macular	Chen_e	Chen_19D013	macular	Caucasian	Female	78	single nuclei	Illumina Novaseq 6000	None	cellranger/arc-GRCh38-2020-A-2.0.0	GRCh38	cellranger-atac-2.1.0
Baylor College of Medicine	Rui Chen	19D014_fovea	Chen_e	Chen_19D014	fovea	Caucasian	Male	84	single nuclei	Illumina Novaseq 6000	None	cellranger/arc-GRCh38-2020-A-2.0.0	GRCh38	cellranger-atac-2.1.0
Baylor College of Medicine	Rui Chen	19D016_macular	Chen_e	Chen_19D016	macular	Caucasian	Male	83	single nuclei	Illumina Novaseq 6000	None	cellranger/arc-GRCh38-2020-A-2.0.0	GRCh38	cellranger-atac-2.1.0
Baylor College of Medicine	Rui Chen	19_D003_lobe	Chen_e	Chen_19_D003	lobe	Caucasian	Male	86	single nuclei	Illumina Novaseq 6000	None	cellranger/arc-GRCh38-2020-A-2.0.0	GRCh38	cellranger-atac-2.1.0
Baylor College of Medicine	Rui Chen	19_D003_macular	Chen_e	Chen_19_D003	macular	Caucasian	Male	86	single nuclei	Illumina Novaseq 6000	None	cellranger/arc-GRCh38-2020-A-2.0.0	GRCh38	cellranger-atac-2.1.0
Baylor College of Medicine	Rui Chen	19_D003_macular_NeuN	Chen_e	Chen_19_D003	macular	Caucasian	Male	86	single nuclei	Illumina Novaseq 6000	NeuN	cellranger/arc-GRCh38-2020-A-2.0.0	GRCh38	cellranger-atac-2.1.0
Baylor College of Medicine	Rui Chen	19_D005_lobe	Chen_e	Chen_19_D005	lobe	Hispanic	Male	53	single nuclei	Illumina Novaseq 6000	None	cellranger/arc-GRCh38-2020-A-2.0.0	GRCh38	cellranger-atac-2.1.0
Baylor College of Medicine	Rui Chen	19_D005_macular	Chen_e	Chen_19_D005	macular	Hispanic	Male	53	single nuclei	Illumina Novaseq 6000	None	cellranger/arc-GRCh38-2020-A-2.0.0	GRCh38	cellranger-atac-2.1.0
Baylor College of Medicine	Rui Chen	19_D006_lobe	Chen_e	Chen_19_D006	lobe	Caucasian	Male	90	single nuclei	Illumina Novaseq 6000	None	cellranger/arc-GRCh38-2020-A-2.0.0	GRCh38	cellranger-atac-2.1.0
Baylor College of Medicine	Rui Chen	19_D006_macular	Chen_e	Chen_19_D006	macular	Caucasian	Male	90	single nuclei	Illumina Novaseq 6000	None	cellranger/arc-GRCh38-2020-A-2.0.0	GRCh38	cellranger-atac-2.1.0
Baylor College of Medicine	Rui Chen	19_D006_macular_NeuN	Chen_e	Chen_19_D006	macular	Caucasian	Male	90	single nuclei	Illumina Novaseq 6000	NeuN	cellranger/arc-GRCh38-2020-A-2.0.0	GRCh38	cellranger-atac-2.1.0
Baylor College of Medicine	Rui Chen	19_D007_lobe	Chen_e	Chen_19_D007	lobe	Caucasian	Male	66	single nuclei	Illumina Novaseq 6000	None	cellranger/arc-GRCh38-2020-A-2.0.0	GRCh38	cellranger-atac-2.1.0
Baylor College of Medicine	Rui Chen	19_D007_macular	Chen_e	Chen_19_D007	macular	Caucasian	Male	66	single nuclei	Illumina Novaseq 6000	None	cellranger/arc-GRCh38-2020-A-2.0.0	GRCh38	cellranger-atac-2.1.0
Baylor College of Medicine	Rui Chen	19_D008_lobe	Chen_e	Chen_19_D008	lobe	Hispanic	Female	64	single nuclei	Illumina Novaseq 6000	None	cellranger/arc-GRCh38-2020-A-2.0.0	GRCh38	cellranger-atac-2.1.0
Baylor College of Medicine	Rui Chen	19_D008_macular	Chen_e	Chen_19_D008	macular	Hispanic	Female	64	single nuclei	Illumina Novaseq 6000	None	cellranger/arc-GRCh38-2020-A-2.0.0	GRCh38	cellranger-atac-2.1.0
Baylor College of Medicine	Rui Chen	19_D009_lobe	Chen_e	Chen_19_D009	lobe	Hispanic	Male	68	single nuclei	Illumina Novaseq 6000	None	cellranger/arc-GRCh38-2020-A-2.0.0	GRCh38	cellranger-atac-2.1.0
Baylor College of Medicine	Rui Chen	19_D009_macular	Chen_e	Chen_19_D009	macular	Hispanic	Male	68	single nuclei	Illumina Novaseq 6000	None	cellranger/arc-GRCh38-2020-A-2.0.0	GRCh38	cellranger-atac-2.1.0
Baylor College of Medicine	Rui Chen	19_D010_lobe	Chen_e	Chen_19_D010	lobe	Caucasian	Female	88	single nuclei	Illumina Novaseq 6000	None	cellranger/arc-GRCh38-2020-A-2.0.0	GRCh38	cellranger-atac-2.1.0
Baylor College of Medicine	Rui Chen	19_D010_macular	Chen_e	Chen_19_D010	macular	Caucasian	Female	88	single nuclei	Illumina Novaseq 6000	None	cellranger/arc-GRCh38-2020-A-2.0.0	GRCh38	cellranger-atac-2.1.0
Baylor College of Medicine	Rui Chen	19_D010_macular_NeuN	Chen_e	Chen_19_D010	macular	Caucasian	Female	88	single nuclei	Illumina Novaseq 6000	NeuN	cellranger/arc-GRCh38-2020-A-2.0.0	GRCh38	cellranger-atac-2.1.0
Baylor College of Medicine	Rui Chen	19_D011_lobe	Chen_e	Chen_19_D011	lobe	Caucasian	Female	90	single nuclei	Illumina Novaseq 6000	None	cellranger/arc-GRCh38-2020-A-2.0.0	GRCh38	cellranger-atac-2.1.0
Baylor College of Medicine	Rui Chen	19_D011_macular	Chen_e	Chen_19_D011	macular	Caucasian	Female	90	single nuclei	Illumina Novaseq 6000	None	cellranger/arc-GRCh38-2020-A-2.0.0	GRCh38	cellranger-atac-2.1.0
Baylor College of Medicine	Rui Chen	19_D019_lobe	Chen_e	Chen_19_D019	lobe	Caucasian	Female	82	single nuclei	Illumina Novaseq 6000	None	cellranger/arc-GRCh38-2020-A-2.0.0	GRCh38	cellranger-atac-2.1.0
Baylor College of Medicine	Rui Chen	19_D019_macular	Chen_e	Chen_19_D019	macular	Caucasian	Female	82	single nuclei	Illumina Novaseq 6000	None	cellranger/arc-GRCh38-2020-A-2.0.0	GRCh38	cellranger-atac-2.1.0
Baylor College of Medicine	Rui Chen	19_D019_macular_NeuN	Chen_e	Chen_19_D019	macular	Caucasian	Female	82	single nuclei	Illumina Novaseq 6000	NeuN	cellranger/arc-GRCh38-2020-A-2.0.0	GRCh38	cellranger-atac-2.1.0
Baylor College of Medicine	Rui Chen	D005_13_lobe	Chen_e	Chen_D005_13	lobe	Caucasian	Male	80	single nuclei	Illumina Novaseq 6000	None	cellranger/arc-GRCh38-2020-A-2.0.0	GRCh38	cellranger-atac-2.1.0
Baylor College of Medicine	Rui Chen	D005_13_macular	Chen_e	Chen_D005_13	macular	Caucasian	Male	80	single nuclei	Illumina Novaseq 6000	None	cellranger/arc-GRCh38-2020-A-2.0.0	GRCh38	cellranger-atac-2.1.0
Baylor College of Medicine	Rui Chen	D009_13_lobe	Chen_e	Chen_D009_13	lobe	Asian	Male	85	single nuclei	Illumina Novaseq 6000	None	cellranger/arc-GRCh38-2020-A-2.0.0	GRCh38	cellranger-atac-2.1.0
Baylor College of Medicine	Rui Chen	D009_13_macular	Chen_e	Chen_D009_13	macular	Asian	Male	85	single nuclei	Illumina Novaseq 6000	None	cellranger/arc-GRCh38-2020-A-2.0.0	GRCh38	cellranger-atac-2.1.0
Baylor College of Medicine	Rui Chen	D013_13_lobe	Chen_e	Chen_D013_13	lobe	Caucasian	Male	69	single nuclei	Illumina Novaseq 6000	None	cellranger/arc-GRCh38-2020-A-2.0.0	GRCh38	cellranger-atac-2.1.0
Baylor College of Medicine	Rui Chen	D013_13_macular	Chen_e	Chen_D013_13	macular	Caucasian	Male	69	single nuclei	Illumina Novaseq 6000	None	cellranger/arc-GRCh38-2020-A-2.0.0	GRCh38	cellranger-atac-2.1.0
Baylor College of Medicine	Rui Chen	D017_13_lobe	Chen_e	Chen_D017_13	lobe	Caucasian	Male	65	single nuclei	Illumina Novaseq 6000	None	cellranger/arc-GRCh38-2020-A-2.0.0	GRCh38	cellranger-atac-2.1.0
Baylor College of Medicine	Rui Chen	D017_13_macular	Chen_e	Chen_D017_13	macular	Caucasian	Male	65	single nuclei	Illumina Novaseq 6000	None	cellranger/arc-GRCh38-2020-A-2.0.0	GRCh38	cellranger-atac-2.1.0
Baylor College of Medicine	Rui Chen	D018_13_lobe	Chen_e	Chen_D018_13	lobe	Caucasian	Female	91	single nuclei	Illumina Novaseq 6000	None	cellranger/arc-GRCh38-2020-A-2.0.0	GRCh38	cellranger-atac-2.1.0
Baylor College of Medicine	Rui Chen	D018_13_macular	Chen_e	Chen_D018_13	macular	Caucasian	Female	91	single nuclei	Illumina Novaseq 6000	None	cellranger/arc-GRCh38-2020-A-2.0.0	GRCh38	cellranger-atac-2.1.0
Baylor College of Medicine	Rui Chen	D019_13_lobe	Chen_e	Chen_D19_13	lobe	Caucasian	Male	82	single nuclei	Illumina Novaseq 6000	None	cellranger/arc-GRCh38-2020-A-2.0.0	GRCh38	cellranger-atac-2.1.0
Baylor College of Medicine	Rui Chen	D019_13_macular	Chen_e	Chen_D19_13	macular	Caucasian	Male	82	single nuclei	Illumina Novaseq 6000	None	cellranger/arc-GRCh38-2020-A-2.0.0	GRCh38	cellranger-atac-2.1.0
Baylor College of Medicine	Rui Chen	D021_13_lobe	Chen_e	Chen_D21_13	lobe	Caucasian	Male	86	single nuclei	Illumina Novaseq 6000	None	cellranger/arc-GRCh38-2020-A-2.0.0	GRCh38	cellranger-atac-2.1.0
Baylor College of Medicine	Rui Chen	D021_13_macular	Chen_e	Chen_D21_13	macular	Caucasian	Male	86	single nuclei	Illumina Novaseq 6000	None	cellranger/arc-GRCh38-2020-A-2.0.0	GRCh38	cellranger-atac-2.1.0
Baylor College of Medicine	Rui Chen	D026_13_lobe	Chen_e	Chen_D026_13	lobe	Caucasian	Male	81	single nuclei	Illumina Novaseq 6000	None	cellranger/arc-GRCh38-2020-A-2.0.0	GRCh38	cellranger-atac-2.1.0
Baylor College of Medicine	Rui Chen	D026_13_macular	Chen_e	Chen_D026_13	macular	Caucasian	Male	81	single nuclei	Illumina Novaseq 6000	None	cellranger/arc-GRCh38-2020-A-2.0.0	GRCh38	cellranger-atac-2.1.0
Baylor College of Medicine	Rui Chen	D027_13_lobe	Chen_e	Chen_D27_13	lobe	Caucasian	Male	77	single nuclei	Illumina Novaseq 6000	None	cellranger/arc-GRCh38-2020-A-2.0.0	GRCh38	cellranger-atac-2.1.0
Baylor College of Medicine	Rui Chen	D027_13_macular	Chen_e	Chen_D27_13	macular	Caucasian	Male	77	single nuclei	Illumina Novaseq 6000	None	cellranger/arc-GRCh38-2020-A-2.0.0	GRCh38	cellranger-atac-2.1.0
Baylor College of Medicine	Rui Chen	D028_13_lobe	Chen_e	Chen_D28_13	lobe	Caucasian	Male	67	single nuclei	Illumina Novaseq 6000	None	cellranger/arc-GRCh38-2020-A-2.0.0	GRCh38	cellranger-atac-2.1.0
Baylor College of Medicine	Rui Chen	D028_13_macular	Chen_e	Chen_D28_13	macular	Caucasian	Male	67	single nuclei	Illumina Novaseq 6000	None	cellranger/arc-GRCh38-2020-A-2.0.0	GRCh38	cellranger-atac-2.1.0
Baylor College of Medicine	Rui Chen	D028_13_macular_NeuN	Chen_e	Chen_D28_13	macular	Caucasian	Male	67	single nuclei	Illumina Novaseq 6000	NeuN	cellranger/arc-GRCh38-2020-A-2.0.0	GRCh38	cellranger-atac-2.1.0
Baylor College of Medicine	Rui Chen	D030_13_lobe	Chen_e	Chen_D30_13	lobe	Caucasian	Female	73	single nuclei	Illumina Novaseq 6000	None	cellranger/arc-GRCh38-2020-A-2.0.0	GRCh38	cellranger-atac-2.1.0
Baylor College of Medicine	Rui Chen	D030_13_macular	Chen_e	Chen_D30_13	macular	Caucasian	Female	73	single nuclei	Illumina Novaseq 6000	None	cellranger/arc-GRCh38-2020-A-2.0.0	GRCh38	cellranger-atac-2.1.0
Seattle Children's Research Institute	David R. Beier	GSM5567523	Beier	GSM5567523	Unknown	Unknown	Male	54	single nuclei	Illumina Novaseq 6000	Unknown	cellranger/arc-GRCh38-2020-A-2.0.0	GRCh38	cellranger-atac-2.1.0
Seattle Children's Research Institute	David R. Beier	GSM5567524	Beier	GSM5567524	Unknown	African	Female	50	single nuclei	Illumina Novaseq 6000	Unknown	cellranger/arc-GRCh38-2020-A-2.0.0	GRCh38	cellranger-atac-2.1.0
Seattle Children's Research Institute	David R. Beier	GSM5567533	Beier	GSM5567533	Unknown	Caucasian	Female	52	single nuclei	Illumina Novaseq 6000	Unknown	cellranger/arc-GRCh38-2020-A-2.0.0	GRCh38	cellranger-atac-2.1.0
