# Supplementary material for: Integrated multi-omics single cell atlas of the human retina
Source: Research Square preprint supplement (doi:10.21203/rs.3.rs-3471275/v1), 2023-11-16
Supplement: Supplementary file 18 [file bce0dad532b91e524bbb02d9.xlsx]

## Sheet: Major class top20 RSS TFs
Table S13. Identified transcription factors and regulon specificity scores for major classes, subclasses and BC types using snRNA-seq and snATAC-seq
Celltype	Top 1 TF	Top 2 TF	Top 3 TF	Top 4 TF	Top 5 TF	Top 6 TF	Top 7 TF	Top 8 TF	Top 9 TF	Top 10 TF	Top 11 TF	Top 12 TF	Top 13 TF	Top 14 TF	Top 15 TF	Top 16 TF	Top 17 TF	Top 18 TF	Top 19 TF	Top 20 TF
AC	PEG3_+_(257r)	NHLH2_+_(226r)	TFAP2A_+_(1236r)	BHLHE22_+_(606r)	MEIS3_+_(1192r)	HLF_+_(298r)	TFAP2C_+_(1768r)	SCRT2_extended_+_(644r)	SCRT1_extended_+_(626r)	PAX6_+_(3161r)	AR_+_(75r)	ZNF765_+_(102r)	DEAF1_+_(58r)	ZNF704_+_(540r)	ZFHX2_+_(669r)	SREBF2_+_(2807r)	HSF4_+_(657r)	RFX4_+_(286r)	MITF_extended_+_(828r)	CUX2_+_(1587r)
Astrocyte	ZIC4_+_(138r)	ZIC2_extended_+_(50r)	FOXK1_+_(47r)	TCF7L1_+_(1239r)	SOX9_+_(1915r)	SOX6_+_(1747r)	PAX5_+_(704r)	PAX2_+_(709r)	SMAD3_+_(1182r)	SOX2_+_(1311r)	BNC2_+_(709r)	NFIX_+_(1915r)	SOX13_+_(82r)	PAX8_+_(361r)	NFATC4_+_(92r)	STAT3_+_(975r)	NFATC1_+_(309r)	MAFF_+_(876r)	CREB5_+_(433r)	ZBTB21_+_(233r)
BC	NEUROD4_extended_+_(823r)	LHX3_+_(130r)	ELK4_+_(170r)	ZFHX2_+_(669r)	NEUROD1_+_(566r)	OTX2_+_(1780r)	SIX3_+_(195r)	VSX2_+_(466r)	BHLHE22_+_(606r)	LHX4_+_(256r)	SCRT1_extended_+_(626r)	SCRT2_extended_+_(644r)	LYL1_+_(26r)	NHLH2_+_(226r)	HLF_+_(298r)	KLF16_+_(172r)	MECP2_+_(450r)	TFAP2A_+_(1236r)	SREBF2_+_(2807r)	ISL2_+_(381r)
Cone	ISL2_+_(381r)	RAX2_+_(427r)	CRX_+_(3171r)	MECP2_+_(450r)	OTX2_+_(1780r)	RAX_+_(2657r)	NEUROD1_+_(566r)	TEAD3_+_(54r)	LHX4_+_(256r)	LHX3_+_(130r)	KLF16_+_(172r)	POU2F1_+_(1544r)	TCF7L2_+_(722r)	NEUROD4_extended_+_(823r)	ELK4_+_(170r)	VSX2_+_(466r)	NR2E3_+_(20r)	ZFHX2_+_(669r)	PPARG_+_(800r)	PPARD_+_(52r)
HC	ONECUT3_+_(732r)	ONECUT2_+_(982r)	ONECUT1_+_(1020r)	LHX1_+_(891r)	CUX2_+_(1587r)	BARHL2_+_(216r)	KLF13_+_(1787r)	PEG3_+_(257r)	HMX1_+_(464r)	SCRT2_extended_+_(644r)	TFEB_+_(493r)	SREBF2_+_(2807r)	ZNF765_+_(102r)	DEAF1_+_(58r)	MEIS3_+_(1192r)	SCRT1_extended_+_(626r)	PAX6_+_(3161r)	POU4F2_extended_+_(209r)	HLF_+_(298r)	ZNF704_+_(540r)
MG	SOX8_+_(1022r)	HES5_extended_+_(89r)	NFIB_+_(1952r)	LHX2_+_(1478r)	NR2E1_+_(880r)	SOX2_+_(1311r)	ZBTB21_+_(233r)	BCL6_+_(466r)	NFIX_+_(1915r)	MAFF_+_(876r)	JUNB_+_(1595r)	FOS_+_(2124r)	HMX1_+_(464r)	SOX6_+_(1747r)	FOXK1_+_(47r)	BHLHE40_+_(644r)	SOX9_+_(1915r)	FOSB_+_(621r)	SOX13_+_(82r)	HES1_+_(139r)
Microglia	REL_+_(236r)	RUNX1_+_(1121r)	IRF8_+_(1508r)	RUNX3_+_(610r)	FLI1_+_(2459r)	IKZF1_+_(1949r)	SPI1_+_(1691r)	ETS2_+_(2577r)	NFATC2_+_(1277r)	PHF20_+_(419r)	TFEC_+_(352r)	CEBPA_+_(268r)	ELF1_+_(3015r)	JDP2_+_(126r)	PPARD_+_(52r)	KLF2_+_(813r)	ETV5_+_(631r)	STAT6_+_(1177r)	MAFB_+_(1245r)	MLXIPL_+_(120r)
RGC	EBF2_+_(691r)	EBF3_+_(1310r)	ZNF765_+_(102r)	EBF1_+_(3875r)	POU4F2_extended_+_(209r)	ZNF511_+_(601r)	KLF7_+_(1513r)	DEAF1_+_(58r)	PPARG_+_(800r)	HSF4_+_(657r)	ZNF273_+_(549r)	MEF2A_+_(437r)	AR_+_(75r)	ZNF704_+_(540r)	MEIS3_+_(1192r)	MITF_extended_+_(828r)	SCRT1_extended_+_(626r)	NHLH2_+_(226r)	PEG3_+_(257r)	ZNF846_+_(642r)
Rod	NR2E3_+_(20r)	CRX_+_(3171r)	RAX2_+_(427r)	NEUROD1_+_(566r)	OTX2_+_(1780r)	MECP2_+_(450r)	KLF16_+_(172r)	TEAD3_+_(54r)	RAX_+_(2657r)	ISL2_+_(381r)	LHX3_+_(130r)	POU2F1_+_(1544r)	LHX4_+_(256r)	TCF7L2_+_(722r)	NEUROD4_extended_+_(823r)	VSX2_+_(466r)	PPARG_+_(800r)	STAT3_+_(975r)	ELK4_+_(170r)	ZFHX2_+_(669r)

## Sheet: Major class RSS
	NEUROD4_extended_+_(823r)	BHLHE40_+_(644r)	KLF10_+_(453r)	DEAF1_+_(58r)	JUN_+_(1817r)	LHX1_+_(891r)	TFAP2C_+_(1768r)	SOX9_+_(1915r)	EGR1_+_(741r)	REL_+_(236r)	SIX3_+_(195r)	EBF1_+_(3875r)	SOX2_+_(1311r)	JUND_+_(2110r)	NEUROD1_+_(566r)	ZNF846_+_(642r)	ATF6_+_(357r)	KLF4_+_(594r)	SREBF2_+_(2807r)	HES5_extended_+_(89r)	HLF_+_(298r)	NHLH2_+_(226r)	SOX13_+_(82r)	NFATC2_+_(1277r)	BCL6_+_(466r)	VSX2_+_(466r)	PHF20_+_(419r)	KLF9_+_(1949r)	BHLHE22_+_(606r)	LHX3_+_(130r)	NR2E1_+_(880r)	TFEB_+_(493r)	MEIS3_+_(1192r)	KLF7_+_(1513r)	SOX8_+_(1022r)	ZNF704_+_(540r)	MAFB_+_(1245r)	ZBTB21_+_(233r)	TCF7L1_+_(1239r)	ONECUT2_+_(982r)	TCF7L2_+_(722r)	HMX1_+_(464r)	ETV1_+_(704r)	HES1_+_(139r)	FLI1_+_(2459r)	MITF_extended_+_(828r)	ZIC4_+_(138r)	BARHL2_+_(216r)	ZNF69_+_(150r)
AC	0.277246	0.282141	0.227619	0.362752	0.225126	0.302938	0.415124	0.222456	0.248842	0.182022	0.30452	0.285113	0.22342	0.250282	0.221329	0.283327	0.274844	0.213884	0.349573	0.255324	0.423745	0.472904	0.265434	0.19534	0.2487	0.254822	0.197145	0.271306	0.459163	0.221793	0.22539	0.324583	0.457031	0.314804	0.218584	0.352918	0.245456	0.238589	0.222451	0.283501	0.21368	0.260618	0.223218	0.249745	0.201986	0.333163	0.202934	0.331144	0.31629
Astrocyte	0.193966	0.362358	0.424052	0.234545	0.424365	0.264602	0.300484	0.5131	0.408295	0.237326	0.299058	0.327473	0.492656	0.425555	0.180373	0.329783	0.355295	0.381739	0.267961	0.346479	0.266354	0.220893	0.489684	0.284498	0.426385	0.288401	0.260858	0.388455	0.207747	0.200824	0.449483	0.288418	0.22168	0.280502	0.439464	0.299214	0.353298	0.45125	0.516734	0.212181	0.401339	0.333729	0.440766	0.439755	0.256438	0.275464	0.579319	0.277158	0.362214
BC	0.580428	0.239942	0.211371	0.264656	0.19132	0.235161	0.249536	0.19813	0.210468	0.177876	0.399045	0.228623	0.19834	0.202128	0.404042	0.214171	0.189193	0.218053	0.288558	0.2154	0.295595	0.318907	0.194974	0.186872	0.19892	0.384568	0.18268	0.221755	0.370044	0.546481	0.204415	0.253841	0.276798	0.242403	0.196816	0.279157	0.217936	0.201352	0.19161	0.230285	0.239935	0.21207	0.201132	0.239845	0.191809	0.260212	0.211606	0.235386	0.233086
Cone	0.264448	0.180829	0.177721	0.20859	0.181352	0.192321	0.200676	0.182311	0.183351	0.177758	0.21216	0.187818	0.182903	0.178317	0.406039	0.178708	0.173255	0.196049	0.191725	0.182047	0.177975	0.179655	0.188597	0.178115	0.184209	0.261632	0.212116	0.18121	0.200058	0.35801	0.178406	0.176725	0.17802	0.190149	0.181167	0.182396	0.181695	0.177964	0.178551	0.187457	0.301825	0.178828	0.177122	0.182089	0.18417	0.189966	0.213947	0.172728	0.167514
HC	0.235765	0.273137	0.230588	0.363638	0.22535	0.515929	0.297783	0.23044	0.245944	0.189376	0.313469	0.260116	0.217927	0.248011	0.194451	0.296084	0.256729	0.218102	0.36524	0.2724	0.332891	0.324765	0.245119	0.206772	0.267326	0.273264	0.210986	0.289389	0.292676	0.197137	0.231622	0.366152	0.358809	0.301778	0.214506	0.330684	0.235524	0.224671	0.217705	0.61946	0.208301	0.395548	0.22633	0.243045	0.20948	0.324636	0.229305	0.436479	0.304434
MG	0.201071	0.413019	0.40277	0.240086	0.397911	0.302963	0.290329	0.408228	0.395504	0.213968	0.304577	0.25746	0.441518	0.399773	0.182094	0.307255	0.344122	0.320351	0.262452	0.481142	0.289513	0.2017	0.403203	0.2547	0.437133	0.386911	0.234969	0.375292	0.224101	0.216535	0.444787	0.28215	0.23306	0.276588	0.510493	0.286045	0.276894	0.441145	0.384138	0.233967	0.319558	0.425484	0.331954	0.402876	0.232166	0.266839	0.32947	0.364329	0.339144
Microglia	0.198084	0.298308	0.363678	0.219514	0.387056	0.213671	0.24607	0.266909	0.354289	0.771337	0.233839	0.274926	0.25885	0.336802	0.19369	0.378166	0.441432	0.485204	0.275126	0.305198	0.235722	0.205172	0.236212	0.671509	0.271521	0.218029	0.666523	0.314151	0.201919	0.198494	0.283686	0.351465	0.204239	0.296445	0.247108	0.237925	0.50824	0.291686	0.308758	0.202191	0.353006	0.252104	0.432198	0.303253	0.693207	0.332967	0.256138	0.214541	0.290247
RGC	0.22748	0.25385	0.217521	0.407005	0.219101	0.24356	0.310009	0.206409	0.228081	0.186609	0.243207	0.469207	0.209999	0.232578	0.206041	0.322507	0.240555	0.212907	0.320026	0.219354	0.283264	0.332644	0.223175	0.197224	0.234222	0.213076	0.216927	0.262582	0.309003	0.187071	0.230132	0.273265	0.339212	0.408224	0.204098	0.349419	0.24413	0.220602	0.211753	0.246088	0.211244	0.220475	0.215944	0.211295	0.207178	0.339094	0.185235	0.251376	0.30215
Rod	0.248277	0.17736	0.186348	0.167453	0.175768	0.177192	0.192036	0.182011	0.184963	0.178944	0.197111	0.181839	0.178441	0.174714	0.423224	0.179108	0.171944	0.192336	0.18389	0.167445	0.176987	0.181692	0.184863	0.178733	0.175154	0.224635	0.193819	0.177316	0.188168	0.286974	0.178917	0.176665	0.177161	0.189658	0.179201	0.179387	0.178876	0.177215	0.17409	0.184316	0.249618	0.169134	0.173612	0.182311	0.180638	0.185389	0.204452	0.17155	0.167445
[truncated: 72 more columns]

## Sheet: AC subclass RSS 
	ZBTB18_+_(234r)	ZNF536_+_(137r)	EBF3_+_(100r)	MEIS2_+_(2308r)	POU6F2_+_(322r)	E2F3_+_(95r)	NR4A2_+_(38r)	NPAS2_extended_+_(24r)	TFAP2C_+_(1051r)	TCF4_+_(1408r)	ESR1_+_(86r)	HMGA2_+_(105r)	BCL11A_+_(49r)	NFIB_+_(818r)	SOX9_+_(20r)	ESRRG_+_(231r)	ZNF385D_+_(60r)	BCL6_+_(89r)	LHX9_+_(313r)	NFIX_+_(454r)	SATB2_extended_+_(67r)	MAF_+_(1073r)	MITF_+_(825r)	PBX1_+_(883r)	LHX2_+_(254r)	PBX3_+_(800r)	ZNF676_+_(58r)	NEUROD2_+_(474r)	SOX5_extended_+_(137r)	MEIS1_+_(3045r)	TBX3_+_(76r)	NR3C2_+_(16r)	ZNF823_+_(42r)	CUX2_+_(274r)	SMAD9_extended_+_(97r)	KLF13_+_(452r)	CREB5_+_(17r)	SMAD3_+_(577r)	NFIA_+_(911r)	MYRF_+_(11r)	NEUROD1_+_(219r)
Both	0.762755	0.265607	0.273412	0.194092	0.216587	0.176308	0.199325	0.270736	0.210941	0.38293	0.196514	0.791973	0.847936	0.25435	0.405977	0.167533	0.316058	0.168273	0.195618	0.247278	0.211516	0.212239	0.225172	0.240126	0.209454	0.203803	0.169247	0.493337	0.479803	0.203574	0.249916	0.181588	0.169998	0.216997	0.31557	0.168473	0.167445	0.217622	0.23801	0.234824	0.618671
GABAergic	0.173649	0.226231	0.175116	0.882864	0.526563	0.714587	0.656902	0.167535	0.830309	0.178623	0.640057	0.228136	0.182896	0.173089	0.350929	0.397914	0.692688	0.46349	0.626243	0.171144	0.333932	0.813974	0.201482	0.807183	0.297279	0.869298	0.168267	0.169258	0.547525	0.791812	0.68188	0.168974	0.700949	0.582063	0.268289	0.673448	0.704436	0.632958	0.183577	0.167622	0.174993
Glycinergic	0.312857	0.766752	0.753179	0.197319	0.467392	0.332326	0.259755	0.766767	0.226196	0.684304	0.388025	0.248932	0.226105	0.818545	0.525704	0.58796	0.223667	0.519359	0.40399	0.825025	0.621976	0.238951	0.832158	0.220701	0.669048	0.198845	0.861543	0.573969	0.233841	0.269119	0.302066	0.904085	0.355858	0.424146	0.6834	0.341873	0.193896	0.409287	0.828047	0.795151	0.449166

## Sheet: BC subclass RSS
	NR3C2_extended_+_(17r)	SREBF2_+_(76r)	NR2F1_+_(118r)	MEIS2_extended_+_(93r)	MXI1_+_(63r)	POU6F2_+_(39r)	POU2F2_+_(38r)	NFIX_+_(83r)	SOX5_+_(64r)	PKNOX2_+_(15r)	BHLHE22_+_(254r)	BACH1_+_(210r)	RORB_extended_+_(11r)	ISL1_+_(347r)	MEF2C_+_(115r)	DMBX1_+_(100r)	EBF1_+_(34r)	ASCL1_+_(64r)	FEZF2_extended_+_(15r)	CUX2_+_(33r)	LHX4_+_(60r)	NEUROD4_extended_+_(265r)	STAT5B_+_(116r)	SATB2_extended_+_(14r)	LHX3_+_(108r)	E2F3_+_(53r)
OFF	0.84061	0.832371	0.232048	0.856415	0.826507	0.269888	0.696992	0.257116	0.168507	0.711719	0.910206	0.949684	0.167831	0.188229	0.175414	0.189001	0.912846	0.846445	0.939668	0.225829	0.746362	0.806632	0.932735	0.624673	0.906564	0.170492
ON	0.170046	0.23508	0.838278	0.226198	0.251432	0.744729	0.357686	0.752864	0.887993	0.33586	0.192087	0.173232	0.823652	0.921944	0.930172	0.901626	0.167445	0.189388	0.168244	0.851666	0.263736	0.268836	0.179824	0.388172	0.198988	0.918836

## Sheet: HC celltype RSS
	ASCL1_+_(10r)	HEY1_extended_+_(10r)	LHX2_+_(105r)	ISL1_+_(15r)	MITF_+_(31r)	LHX1_+_(108r)
HC0	0.838526	0.950577	0.985902	0.167445	0.92396	0.988799
HC1	0.167445	0.167445	0.167445	0.995334	0.167445	0.167445

## Sheet: Cone celltype RSS
	STAT4_+_(15r)	RARB_+_(32r)
ML	0.96313	0.968747
S	0.167445	0.167445

## Sheet: BC celltype RSS
	ELK4_+_(99r)	BACH1_+_(365r)	NFIA_+_(1418r)	SMAD9_extended_+_(40r)	ASCL1_+_(123r)	MEF2C_+_(254r)	POU6F2_+_(187r)	MEIS2_extended_+_(146r)	NFIX_+_(504r)	SALL4_+_(56r)	ISL1_+_(521r)	KLF9_+_(56r)	DMBX1_+_(239r)	BHLHE22_+_(648r)	NEUROG1_+_(188r)	FEZF2_extended_+_(43r)
BB	0.299346	0.22683	0.194387	0.250779	0.190534	0.214727	0.199068	0.214988	0.189094	0.436059	0.24599	0.210832	0.350946	0.206415	0.203189	0.192221
DB1	0.188447	0.245155	0.189242	0.319866	0.42362	0.211103	0.191457	0.205361	0.184089	0.231423	0.213974	0.169955	0.217947	0.296763	0.190239	0.231256
DB2	0.371989	0.343202	0.272892	0.194001	0.237291	0.172021	0.22002	0.306288	0.222771	0.184316	0.183748	0.3234	0.228963	0.244993	0.285318	0.360201
DB3a	0.208276	0.285582	0.246708	0.2921	0.270982	0.269247	0.222339	0.268062	0.217823	0.167502	0.195488	0.272804	0.212778	0.366807	0.222735	0.273067
DB3b	0.270757	0.30086	0.347231	0.189246	0.21535	0.190224	0.29826	0.389858	0.292434	0.185599	0.190423	0.326816	0.221076	0.229827	0.351543	0.407309
DB4a	0.184593	0.194498	0.355956	0.193014	0.195533	0.29462	0.34787	0.279749	0.416363	0.208605	0.259558	0.307113	0.224476	0.205832	0.299404	0.222325
DB4b	0.180571	0.194672	0.33582	0.203658	0.19659	0.308967	0.388418	0.262065	0.394167	0.220065	0.260116	0.283182	0.232782	0.217513	0.266463	0.207013
DB5	0.186992	0.195895	0.258741	0.20901	0.210058	0.287904	0.321249	0.243385	0.267166	0.239421	0.290679	0.291057	0.229973	0.213764	0.352265	0.181909
DB6	0.192847	0.195071	0.190159	0.352993	0.261858	0.275917	0.209268	0.189233	0.195917	0.242891	0.276404	0.211291	0.233429	0.23177	0.177695	0.172333
FMB	0.302353	0.340645	0.214189	0.217528	0.267755	0.174128	0.173357	0.236528	0.189913	0.203123	0.192371	0.196571	0.22819	0.307966	0.236689	0.289629
GB	0.294059	0.20706	0.191225	0.262016	0.193334	0.221962	0.197844	0.204463	0.19186	0.416575	0.259943	0.196885	0.351338	0.201626	0.200992	0.182452
IMB	0.250317	0.18185	0.198796	0.205641	0.184281	0.259712	0.206497	0.199865	0.20563	0.198721	0.280535	0.214097	0.269071	0.191165	0.208255	0.167445
OFFx	0.282327	0.31296	0.213433	0.285226	0.340424	0.206645	0.19264	0.236161	0.195848	0.21886	0.218707	0.210112	0.229606	0.311342	0.222398	0.290396
RBC	0.190926	0.180782	0.196212	0.257413	0.20374	0.337358	0.219598	0.194992	0.198751	0.190721	0.366851	0.211063	0.224491	0.206798	0.199846	0.1777

## Sheet: BC celltype regulon module
Regulon	Module ID
CUX2_-_+_(82r)	9
SALL4_+_+_(56r)	5
ZNF385D_-_+_(46r)	3
PBX3_+_+_(17r)	5
SOX6_+_+_(11r)	7
NFIA_-_+_(269r)	3
ETV6_-_+_(12r)	9
NEUROG1_+_+_(188r)	7
ARID5A_extended_+_+_(20r)	4
SOX5_-_+_(23r)	3
BACH2_-_+_(57r)	4
E2F3_-_+_(27r)	6
ASCL1_+_+_(123r)	6
SREBF2_+_+_(415r)	9
BHLHE22_-_+_(181r)	7
TCF4_-_+_(152r)	5
MEIS2_extended_+_+_(146r)	9
SMAD9_extended_+_+_(40r)	6
VSX2_+_+_(412r)	2
EBF1_+_+_(41r)	6
KLF12_+_+_(335r)	5
NEUROG1_-_+_(186r)	4
FEZF2_extended_-_+_(32r)	7
LHX4_-_+_(33r)	1
NR3C2_extended_+_+_(109r)	8
NFIA_+_+_(1418r)	7
VSX1_extended_+_+_(111r)	7
NEUROD4_extended_+_+_(551r)	7
PHF21A_extended_+_+_(88r)	3
POU6F2_extended_-_+_(34r)	1
NR3C1_-_+_(208r)	7
SIX3_+_+_(110r)	6
HLF_+_+_(60r)	5
FEZF2_extended_+_+_(43r)	9
BACH1_+_+_(365r)	9
STAT5B_+_+_(184r)	9
MEIS2_extended_-_+_(165r)	8
DMBX1_+_+_(239r)	5
PBX1_-_+_(51r)	2
ZNF142_+_+_(88r)	3
KLF9_+_+_(56r)	7
BHLHE22_+_+_(648r)	8
FOXO1_-_+_(21r)	7
PKNOX2_+_+_(48r)	9
LHX4_+_+_(403r)	7
SOX6_-_+_(48r)	3
SIX3_-_+_(176r)	8
ZFHX3_-_+_(9r)	7
ZNF536_+_+_(145r)	7
NR2F1_-_+_(193r)	10
MEF2C_-_+_(22r)	4
ISL1_+_+_(521r)	3
ZNF536_-_+_(41r)	1
EBF1_-_+_(28r)	3
KLF3_extended_-_+_(15r)	6
TCF4_+_+_(1503r)	9
PLAGL1_extended_+_+_(93r)	9
LHX3_-_+_(257r)	2
NFIB_+_+_(480r)	7
ZSCAN31_+_+_(22r)	3
NFIX_+_+_(504r)	7
ELK4_+_+_(99r)	4
MEIS1_+_+_(479r)	8
FOXO1_+_+_(87r)	4
E2F3_+_+_(60r)	3
MEF2C_+_+_(254r)	2
POU6F2_+_+_(187r)	7
NR2F1_+_+_(176r)	7
DMBX1_-_+_(149r)	9
SATB2_+_+_(17r)	8
SOX5_extended_+_+_(194r)	1
BACH1_-_+_(176r)	2
MEIS1_-_+_(316r)	7
CUX2_+_+_(114r)	2
ESRRG_+_+_(202r)	8
JUN_+_+_(32r)	9
PBX1_+_+_(175r)	5
ZEB1_+_+_(232r)	3
TFCP2_+_+_(91r)	3
TEAD1_+_+_(27r)	4
VSX1_-_+_(236r)	9
ZEB2_-_+_(18r)	8
ELF2_-_+_(10r)	9
