# Supplementary material for: Integrated multi-omics single cell atlas of the human retina
Source: Research Square preprint supplement (doi:10.21203/rs.3.rs-3471275/v1), 2023-11-16
Supplement: Supplementary file 19 [file d5ab80ec09327248f5cd31b8.xlsx]

## Sheet: Table S14
Table S14. Metadata information of snRNA-seq samples from young donors
institute	study_PI	sampleid	dataset_name	donor	tissue	race	gender	age	disociation	library_platform	strand_sequence	sequencing_platform	cell_enrichment	reference_genome_build	reference_genome	reads_processing
Baylor College of Medicine	Rui Chen	chen_d_22_0183_Mac_NeuN	chen_d	BCM_22-0183	macular	Caucasian	Male	21	single nuclei	10x-3'-v3	3'	Illumina Novaseq 6000	NeuN	GRCh38	cellranger/GRCh38-2020-A	cellranger-7.0.1
Baylor College of Medicine	Rui Chen	chen_d_22_0183_Mac_Nu	chen_d	BCM_22-0183	macular	Caucasian	Male	21	single nuclei	10x-3'-v3	3'	Illumina Novaseq 6000	None	GRCh38	cellranger/GRCh38-2020-A	cellranger-7.0.1
Baylor College of Medicine	Rui Chen	chen_d_22_0458_Mac_NeuN	chen_d	BCM_22-0458	macular	Hispanic	Female	25	single nuclei	10x-3'-v3	3'	Illumina Novaseq 6000	NeuN	GRCh38	cellranger/GRCh38-2020-A	cellranger-7.0.1
Baylor College of Medicine	Rui Chen	chen_d_22_0458_Mac_Nu	chen_d	BCM_22-0458	macular	Hispanic	Female	25	single nuclei	10x-3'-v3	3'	Illumina Novaseq 6000	None	GRCh38	cellranger/GRCh38-2020-A	cellranger-7.0.1
Baylor College of Medicine	Rui Chen	chen_d_22_0784_Mac_NeuN	chen_d	BCM_22-0784	macular	African	Female	43	single nuclei	10x-3'-v3	3'	Illumina Novaseq 6000	NeuN	GRCh38	cellranger/GRCh38-2020-A	cellranger-7.0.1
Baylor College of Medicine	Rui Chen	chen_d_22_0784_Mac_Nu	chen_d	BCM_22-0784	macular	African	Female	43	single nuclei	10x-3'-v3	3'	Illumina Novaseq 6000	None	GRCh38	cellranger/GRCh38-2020-A	cellranger-7.0.1
Baylor College of Medicine	Rui Chen	chen_d_3v31_22_0434_Mac_NeuN	chen_d	BCM_22-0434	macular	African	Female	32	single nuclei	10x-3'-v3	3'	Illumina Novaseq 6000	NeuN	GRCh38	cellranger/GRCh38-2020-A	cellranger-7.0.1
Baylor College of Medicine	Rui Chen	chen_d_3v31_22_0434_Mac_Nu	chen_d	BCM_22-0434	macular	African	Female	32	single nuclei	10x-3'-v3	3'	Illumina Novaseq 6000	None	GRCh38	cellranger/GRCh38-2020-A	cellranger-7.0.1
Baylor College of Medicine	Rui Chen	chen_d_3v31_22_200_mac_NeuN	chen_d	BCM_22-0200	macular	Hispanic	Female	43	single nuclei	10x-3'-v3	3'	Illumina Novaseq 6000	NeuN	GRCh38	cellranger/GRCh38-2020-A	cellranger-7.0.1
Baylor College of Medicine	Rui Chen	chen_d_3v31_22_200_mac_Nu	chen_d	BCM_22-0200	macular	Hispanic	Female	43	single nuclei	10x-3'-v3	3'	Illumina Novaseq 6000	None	GRCh38	cellranger/GRCh38-2020-A	cellranger-7.0.1
Baylor College of Medicine	Rui Chen	chen_d_3v31_22_698_mac_NeuN	chen_d	BCM_22-0698	macular	Caucasian	Male	0(1day)	single nuclei	10x-3'-v3	3'	Illumina Novaseq 6000	NeuN	GRCh38	cellranger/GRCh38-2020-A	cellranger-7.0.1
Baylor College of Medicine	Rui Chen	chen_d_3v31_22_698_mac_Nu	chen_d	BCM_22-0698	macular	Caucasian	Male	0(1day)	single nuclei	10x-3'-v3	3'	Illumina Novaseq 6000	None	GRCh38	cellranger/GRCh38-2020-A	cellranger-7.0.1
Baylor College of Medicine	Rui Chen	chen_d_3v31_22_0131_PerT_Nu	chen_d	BCM_23-0131	lobe	Hispanic	Male	16	single nuclei	10x-3'-v3	3'	Illumina Novaseq 6000	None	GRCh38	cellranger/GRCh38-2020-A	cellranger-7.0.1
Baylor College of Medicine	Rui Chen	chen_d_3v31_22_0183_PerT_Nu	chen_d	BCM_22-0183	lobe	Caucasian	Male	21	single nuclei	10x-3'-v3	3'	Illumina Novaseq 6000	None	GRCh38	cellranger/GRCh38-2020-A	cellranger-7.0.1
Baylor College of Medicine	Rui Chen	chen_d_3v31_22_0200_PerT_Nu	chen_d	BCM_22-0200	lobe	Hispanic	Female	43	single nuclei	10x-3'-v3	3'	Illumina Novaseq 6000	None	GRCh38	cellranger/GRCh38-2020-A	cellranger-7.0.1
Baylor College of Medicine	Rui Chen	chen_d_3v31_22_0434_PerT_Nu	chen_d	BCM_22-0434	lobe	African	Female	32	single nuclei	10x-3'-v3	3'	Illumina Novaseq 6000	None	GRCh38	cellranger/GRCh38-2020-A	cellranger-7.0.1
Baylor College of Medicine	Rui Chen	chen_d_3v31_22_0458_PerT_Nu	chen_d	BCM_22-0458	lobe	Hispanic	Female	25	single nuclei	10x-3'-v3	3'	Illumina Novaseq 6000	None	GRCh38	cellranger/GRCh38-2020-A	cellranger-7.0.1
Baylor College of Medicine	Rui Chen	chen_d_3v31_22_0698_PerT_Nu	chen_d	BCM_22-0698	lobe	Caucasian	Male	0(1day)	single nuclei	10x-3'-v3	3'	Illumina Novaseq 6000	None	GRCh38	cellranger/GRCh38-2020-A	cellranger-7.0.1
Baylor College of Medicine	Rui Chen	chen_d_3v31_22_0784_PerT_Nu	chen_d	BCM_22-0784	lobe	African	Female	43	single nuclei	10x-3'-v3	3'	Illumina Novaseq 6000	None	GRCh38	cellranger/GRCh38-2020-A	cellranger-7.0.1
Baylor College of Medicine	Rui Chen	chen_d_3v31_22_769_PerT_Nu	chen_d	BCM_22-0769	lobe	Caucasian	Male	11	single nuclei	10x-3'-v3	3'	Illumina Novaseq 6000	None	GRCh38	cellranger/GRCh38-2020-A	cellranger-7.0.1
