# Supplementary material for: Integrated multi-omics single cell atlas of the human retina
Source: Research Square preprint supplement (doi:10.21203/rs.3.rs-3471275/v1), 2023-11-16
Supplement: Supplementary file 20 [file f2469019c0cc9f863aa59ffc.xlsx]

## Sheet: Table S4
Table S4. Cell proportion distribution of the major classes
Majjor class	# cells	Proportion
Rod	734558	0.354745
BC	495330	0.239213
AC	411712	0.198831
MG	163573	0.0789955
RGC	140132	0.0676749
Cone	75240	0.0363362
HC	31494	0.0152096
Astrocyte	7922	0.00382583
Microglia	5711	0.00275805
RPE	4991	0.00241034
total	2070663	1
